# Supplementary material for: Gene expression changes in response to aging compared to heat stress, oxidative stress and ionizing radiation in Drosophila melanogaster
Source: Aging (Albany NY). 2012 Nov 30;4(11):768–89. doi: 10.18632/aging.100499 (PMC3560439; doi:10.18632/aging.100499)
Supplement: Supplementary file 5 [file aging-04-768-s005.xlsx]

## Sheet: TableS4a.Ageup
Table S4a. Age up
Index	ID	M	A	t	P.Value	adj.P.Val	B	FlyBase	Ensembl	Gene.Symbol	Gene.Title	Entrez.Gene	Gene.Ontology.Molecular.Function	Gene.Ontology.Biological.Process	Gene.Ontology.Cellular.Component	InterPro
9837	151036_f_at	5.57997	0.423338	24.4568	4.95e-22	3.09e-19	40.2533	FBgn0051354 /// FBgn0013277 /// FBgn0013276 /// FBgn0013278 /// FBgn0013279	CG18743 /// CG31449 /// CG5834 /// CG31359 /// CG6489	Hsp70Bbb /// Hsp70Ba /// Hsp70Ab /// Hsp70Bb /// Hsp70Bc	Hsp70Bbb /// Heat-shock-protein-70Ba /// Heat-shock-protein-70Ab /// Heat-shock-protein-70Bb /// Heat-shock-protein-70Bc	44920 /// 44921 /// 48582 /// 48583 /// 50022	5524 // ATP binding // inferred from electronic annotation /// 166 // nucleotide binding // inferred from electronic annotation	6457 // protein folding // inferred from electronic annotation /// 6461 // protein complex assembly // inferred from electronic annotation /// 6952 // defense response // inferred from electronic annotation /// 9408 // response to heat // inferred from sequence or structural similarity /// 9408 // response to heat // non-traceable author statement /// 6986 // response to unfolded protein // infer…	---	IPR001023 // Heat shock protein Hsp70 // 1.0E-126
8583	149782_at	5.51522	1.72579	26.3243	5.43e-23	3.81e-20	42.4033	FBgn0013279 /// FBgn0013278 /// FBgn0013277 /// FBgn0051354	CG31449 /// CG5834 /// CG31359 /// CG6489	Hsp70Bc /// Hsp70Bb /// Hsp70Ba /// Hsp70Bbb	Heat-shock-protein-70Bc /// Heat-shock-protein-70Bb /// Heat-shock-protein-70Ba /// Hsp70Bbb	44921 /// 48582 /// 48583 /// 50022	5524 // ATP binding // inferred from electronic annotation /// 166 // nucleotide binding // inferred from electronic annotation	6457 // protein folding // inferred from electronic annotation /// 6461 // protein complex assembly // inferred from electronic annotation /// 6952 // defense response // inferred from electronic annotation /// 9408 // response to heat // non-traceable author statement /// 9408 // response to heat // inferred from sequence or structural similarity /// 6986 // response to unfolded protein // infer…	---	IPR001023 // Heat shock protein Hsp70 // 1.0E-126
2244	143443_at	4.71145	0.89054	6.84214	1.06e-07	9.37e-07	7.18037	FBgn0004240	CG12763	Dpt	Diptericin	37183	5515 // protein binding // inferred from physical interaction	6961 // antibacterial humoral response (sensu Protostomia) // inferred from expression pattern /// 6961 // antibacterial humoral response (sensu Protostomia) // non-traceable author statement /// 42742 // defense response to bacteria // inferred from sequence or structural similarity /// 42742 // defense response to bacteria // non-traceable author statement /// 42742 // defense response to bacte…	5576 // extracellular region // inferred from electronic annotation	IPR005521 // Attacin, C-terminal region // 5.5E-42
2408	143607_at	4.32819	-0.148197	28.0812	7.72e-24	9.01e-21	44.2876	FBgn0010385	CG1385	Def	Defensin	36047	---	6961 // antibacterial humoral response (sensu Protostomia) // inferred from expression pattern /// 6961 // antibacterial humoral response (sensu Protostomia) // inferred from sequence or structural similarity /// 6965 // anti-Gram-positive bacterial polypeptide induction // non-traceable author statement /// 42742 // defense response to bacteria // non-traceable author statement /// 42742 // defe…	---	IPR001542 // Arthropod defensin // 3.7E-23
10827	152026_at	4.32566	2.43074	12.356	1.31e-13	5.57e-12	20.913	FBgn0027584	CG4757	CG4757	CG4757	41330	4091 // carboxylesterase activity // inferred from sequence or structural similarity /// 3824 // catalytic activity // inferred from electronic annotation /// 4759 // serine esterase activity // inferred from electronic annotation /// 4091 // carboxylesterase activity // inferred from sequence similarity	---	---	IPR002018 // Carboxylesterase, type B // 1.0E-126
5951	147150_at	4.03251	0.918201	9.05658	2.83e-10	4.48e-09	13.1579	FBgn0041579	CG4740	AttC	Attacin-C	36484	---	6952 // defense response // inferred from direct assay /// 6961 // antibacterial humoral response (sensu Protostomia) // inferred from sequence or structural similarity /// 6961 // antibacterial humoral response (sensu Protostomia) // non-traceable author statement /// 19731 // antibacterial humoral response // inferred from direct assay /// 42742 // defense response to bacteria // non-traceable …	5576 // extracellular region // inferred from direct assay /// 5576 // extracellular region // inferred from electronic annotation	IPR005521 // Attacin, C-terminal region // 4.2E-63 /// IPR005520 // Attacin, N-terminal region // 3.3E-37
11046	152245_at	4.01519	3.4503	13.1035	2.77e-14	1.47e-12	22.4826	FBgn0033857	CG13335	CG42807	CG13335	36511	---	---	---	---
6021	147220_s_at	3.86435	1.79942	9.77226	4.76e-11	9.14e-10	14.9599	FBgn0041581 /// FBgn0012042	CG10146 /// CG18372	AttB /// AttA	Attacin-B /// Attacin-A	36636 /// 36637	---	6961 // antibacterial humoral response (sensu Protostomia) // inferred from expression pattern /// 6961 // antibacterial humoral response (sensu Protostomia) // non-traceable author statement /// 42742 // defense response to bacteria // traceable author statement /// 50829 // defense response to Gram-negative bacteria // inferred from expression pattern /// 50829 // defense response to Gram-negat…	5576 // extracellular region // inferred from electronic annotation /// 5576 // extracellular region // traceable author statement	IPR005521 // Attacin, C-terminal region // 3.5E-70 /// IPR005520 // Attacin, N-terminal region // 7.5E-34 /// IPR005521 // Attacin, C-terminal region // 2.2E-69 /// IPR005520 // Attacin, N-terminal region // 1.7E-33 /// IPR005520 // Attacin, N-terminal region // 9.8E-24
2410	143609_at	3.81454	0.936196	7.90176	5.79e-09	6.74e-08	10.1115	FBgn0010388	CG10816	Dro	Drosocin	36635	8368 // Gram-negative bacterial binding // inferred from direct assay /// 51076 // Gram-positive bacterial binding // inferred from direct assay	6952 // defense response // inferred from direct assay /// 6961 // antibacterial humoral response (sensu Protostomia) // inferred from expression pattern /// 42742 // defense response to bacteria // non-traceable author statement /// 42742 // defense response to bacteria // traceable author statement /// 50829 // defense response to Gram-negative bacteria // inferred from direct assay /// 50829 /…	5576 // extracellular region // inferred from direct assay	---
2571	143770_at	3.58806	1.60963	5.89194	1.58e-06	1.11e-05	4.47238	FBgn0014865	CG8175	Mtk	Metchnikowin	36708	---	6952 // defense response // inferred from direct assay /// 6961 // antibacterial humoral response (sensu Protostomia) // inferred from expression pattern /// 6961 // antibacterial humoral response (sensu Protostomia) // non-traceable author statement /// 6966 // antifungal humoral response (sensu Protostomia) // inferred from expression pattern /// 6966 // antifungal humoral response (sensu Proto…	5576 // extracellular region // inferred from direct assay	---
5206	146405_at	3.57275	0.419578	10.2448	1.52e-11	3.4e-10	16.1128	FBgn0032638	CG6639	CG6639	CG6639	35049	4252 // serine-type endopeptidase activity // non-traceable author statement /// 4263 // chymotrypsin activity // inferred from electronic annotation /// 4295 // trypsin activity // inferred from electronic annotation /// 4871 // signal transducer activity // inferred from electronic annotation /// 4252 // serine-type endopeptidase activity // inferred from electronic annotation	6508 // proteolysis // inferred from electronic annotation /// 7186 // G-protein coupled receptor protein signaling pathway // inferred from electronic annotation /// 7242 // intracellular signaling cascade // inferred from electronic annotation	5834 // heterotrimeric G-protein complex // inferred from electronic annotation	IPR001254 // Peptidase S1, chymotrypsin // 3.1E-54
6274	147473_at	3.49657	1.41914	7.55865	1.47e-08	1.57e-07	9.17527	FBgn0034407 /// FBgn0068165	CG10794	DptB /// DyakDptB	Diptericin B /// DptB	37184	---	6961 // antibacterial humoral response (sensu Protostomia) // inferred from sequence or structural similarity /// 6961 // antibacterial humoral response (sensu Protostomia) // inferred from electronic annotation /// 6961 // antibacterial humoral response (sensu Protostomia) // inferred from sequence similarity	5576 // extracellular region // inferred from electronic annotation	IPR005521 // Attacin, C-terminal region // 8.6E-17
175	141374_at	3.24383	1.36497	8.91187	4.1e-10	6.26e-09	12.7855	FBgn0012042	CG10146	AttA	Attacin-A	36636	---	6961 // antibacterial humoral response (sensu Protostomia) // inferred from expression pattern /// 6961 // antibacterial humoral response (sensu Protostomia) // non-traceable author statement /// 42742 // defense response to bacteria // traceable author statement /// 50829 // defense response to Gram-negative bacteria // inferred from expression pattern /// 50829 // defense response to Gram-negat…	5576 // extracellular region // inferred from electronic annotation	IPR005521 // Attacin, C-terminal region // 3.5E-70 /// IPR005520 // Attacin, N-terminal region // 7.5E-34 /// IPR005520 // Attacin, N-terminal region // 9.8E-24
5792	146991_at	3.23913	1.81775	18.4427	2.01e-18	4.73e-16	32.0473	FBgn0033593	CG9080	Listericin	Listericin	36183	---	---	---	---
4647	145846_at	3.23851	0.00154663	17.2682	1.33e-17	2.14e-15	30.1616	FBgn0031736	CG11030	CG11030	CG11030	33805	---	---	---	---
1998	143197_at	3.23	2.04211	16.2778	7.11e-17	9.12e-15	28.4836	FBgn0001230	CG5436	Hsp68	Heat shock protein 68	42852	5524 // ATP binding // inferred from electronic annotation /// 51082 // unfolded protein binding // inferred from sequence or structural similarity /// 166 // nucleotide binding // inferred from electronic annotation /// 51082 // unfolded protein binding // inferred from sequence similarity	6457 // protein folding // inferred from electronic annotation /// 6457 // protein folding // inferred from sequence or structural similarity /// 6461 // protein complex assembly // inferred from electronic annotation /// 6952 // defense response // inferred from electronic annotation /// 8340 // determination of adult life span // inferred from mutant phenotype /// 9408 // response to heat // in…	5739 // mitochondrion // inferred from sequence or structural similarity /// 5739 // mitochondrion // inferred from sequence similarity	IPR001023 // Heat shock protein Hsp70 // 1.0E-126
4621	145820_at	3.0655	1.78256	8.24163	2.34e-09	2.98e-08	11.0253	FBgn0031701	CG14027	TotM	Turandot M	33764	---	16065 // humoral defense mechanism (sensu Protostomia) // non-traceable author statement	---	IPR010825 // Stress-inducible humoral factor Turandot // 2.3E-80 /// IPR010825 // Stress-inducible humoral factor Turandot // 1.1E-9
12532	153731_at	3.03717	2.44948	17.7256	6.29e-18	1.2e-15	30.9089	FBgn0001225	CG4183	Hsp26	Heat shock protein 26	39075	---	6457 // protein folding // inferred from electronic annotation /// 6952 // defense response // inferred from electronic annotation /// 8340 // determination of adult life span // inferred from mutant phenotype /// 9408 // response to heat // inferred from sequence or structural similarity /// 9408 // response to heat // non-traceable author statement /// 6986 // response to unfolded protein // in…	---	IPR002068 // Heat shock protein Hsp20 // 6.6E-47
7340	148539_at	2.96126	2.12471	32.2817	1.11e-25	3.11e-22	48.3279	FBgn0036110	CG18348	Cpr67Fb	Cuticular protein 67Fb	39225	42302 // structural constituent of cuticle // inferred from electronic annotation	---	---	IPR000618 // Insect cuticle protein // 9.6E-28
2406	143605_at	2.89296	3.91562	10.3406	1.21e-11	2.81e-10	16.3427	FBgn0010381	CG10810	Drs	Drosomycin	38419	8200 // ion channel inhibitor activity // inferred from electronic annotation	6952 // defense response // inferred from direct assay /// 6961 // antibacterial humoral response (sensu Protostomia) // traceable author statement /// 6966 // antifungal humoral response (sensu Protostomia) // inferred from expression pattern /// 6966 // antifungal humoral response (sensu Protostomia) // non-traceable author statement /// 9405 // pathogenesis // inferred from electronic annotati…	5576 // extracellular region // inferred from direct assay /// 5576 // extracellular region // inferred from electronic annotation	IPR008176 // Gamma thionin // 2.7E-19
8650	149849_at	2.77953	1.19913	41.9161	3.61e-29	5.06e-25	55.7096	FBgn0038160	CG9759	CG9759	CG9759	41661	---	---	---	---
6486	147685_at	2.75259	0.889156	15.6794	2.04e-16	2.18e-14	27.4279	FBgn0034741	CG4269	CG4269	CG4269	37578	---	---	---	---
10568	151767_at	2.65046	2.69898	19.8553	2.36e-19	7.88e-17	34.1789	FBgn0010222	CG18466	Nmdmc	NAD-dependent methylenetetrahydrofolate dehydrogenase	47895	287 // magnesium ion binding // non-traceable author statement /// 4477 // methenyltetrahydrofolate cyclohydrolase activity // inferred from sequence or structural similarity /// 4477 // methenyltetrahydrofolate cyclohydrolase activity // non-traceable author statement /// 4487 // methylenetetrahydrofolate dehydrogenase (NAD+) activity // non-traceable author statement /// 4488 // methylenetetrah…	5975 // carbohydrate metabolism // inferred from sequence or structural similarity /// 8652 // amino acid biosynthesis // inferred from electronic annotation /// 9256 // 10-formyltetrahydrofolate metabolism // inferred from sequence or structural similarity /// 9396 // folic acid and derivative biosynthesis // inferred from electronic annotation /// 46653 // tetrahydrofolate metabolism // inferre…	5739 // mitochondrion // inferred from sequence or structural similarity /// 5739 // mitochondrion // non-traceable author statement /// 5739 // mitochondrion // inferred from electronic annotation /// 5739 // mitochondrion // inferred from sequence similarity	IPR000672 // Tetrahydrofolate dehydrogenase/cyclohydrolase // 5.3E-79 /// IPR000672 // Tetrahydrofolate dehydrogenase/cyclohydrolase // 3.5E-112 /// IPR000672 // Tetrahydrofolate dehydrogenase/cyclohydrolase // 5.3E-79 /// IPR000672 // Tetrahydrofolate dehydrogenase/cyclohydrolase // 3.5E-112
6752	147951_at	2.59798	2.06916	14.1698	3.35e-15	2.46e-13	24.6129	FBgn0035176	CG13905	CG13905	CG13905	38107	---	---	---	---
12562	153761_at	2.46383	3.03911	26.6688	3.67e-23	2.86e-20	42.7828	FBgn0039241	CG11089	CG11089	CG11089	42973	3937 // IMP cyclohydrolase activity // inferred from sequence or structural similarity /// 4643 // phosphoribosylaminoimidazolecarboxamide formyltransferase activity // inferred from sequence or structural similarity /// 3937 // IMP cyclohydrolase activity // inferred from electronic annotation /// 4643 // phosphoribosylaminoimidazolecarboxamide formyltransferase activity // inferred from electro…	6144 // purine base metabolism // inferred from electronic annotation /// 6164 // purine nucleotide biosynthesis // inferred from electronic annotation	---	IPR002695 // AICARFT/IMPCHase bienzyme // 1.0E-126 /// IPR004362 // Methylglyoxal synthase-like domain // 3.3E-49
12108	153307_at	2.42268	2.16043	15.4591	3.02e-16	3.09e-14	27.0309	FBgn0001226	CG4466	Hsp27	Heat shock protein 27	39078	5515 // protein binding // inferred from physical interaction	6457 // protein folding // inferred from electronic annotation /// 6952 // defense response // inferred from electronic annotation /// 8340 // determination of adult life span // inferred from mutant phenotype /// 9408 // response to heat // inferred from sequence or structural similarity /// 9408 // response to heat // non-traceable author statement /// 42026 // protein refolding // non-traceabl…	---	IPR002068 // Heat shock protein Hsp20 // 1.6E-43
1862	143061_at	2.36826	2.37573	13.176	2.39e-14	1.3e-12	22.6314	FBgn0000047	CG5178	Act88F	Actin 88F	41885	5200 // structural constituent of cytoskeleton // inferred from sequence or structural similarity /// 5200 // structural constituent of cytoskeleton // inferred from sequence similarity	7010 // cytoskeleton organization and biogenesis // inferred from sequence or structural similarity /// 7010 // cytoskeleton organization and biogenesis // inferred from sequence similarity	5884 // actin filament // inferred from sequence or structural similarity /// 5884 // actin filament // non-traceable author statement /// 5884 // actin filament // inferred from sequence similarity	IPR004000 // Actin/actin-like // 1.0E-126
10635	151834_at	2.34813	3.33199	14.6912	1.24e-15	1.01e-13	25.6109	FBgn0052130	CG32130	stv	starvin	39518	4263 // chymotrypsin activity // inferred from electronic annotation /// 4295 // trypsin activity // inferred from electronic annotation /// 5515 // protein binding // inferred from electronic annotation /// 5515 // protein binding // inferred from physical interaction /// 4252 // serine-type endopeptidase activity // inferred from electronic annotation /// 8233 // peptidase activity // inferred …	6508 // proteolysis // inferred from electronic annotation /// 6915 // apoptosis // inferred from electronic annotation	---	IPR003103 // Apoptosis regulator Bcl-2 protein, BAG // 1.4E-17 /// IPR003103 // Apoptosis regulator Bcl-2 protein, BAG // 1.4E-17 /// IPR003103 // Apoptosis regulator Bcl-2 protein, BAG // 1.4E-17
8595	149794_at	2.31721	4.21484	20.7945	6.09e-20	2.44e-17	35.5205	FBgn0038074	CG6188	CG6188	CG6188	41561	17174 // glycine N-methyltransferase activity // inferred from sequence or structural similarity /// 8168 // methyltransferase activity // inferred from electronic annotation /// 8757 // S-adenosylmethionine-dependent methyltransferase activity // inferred from electronic annotation /// 16740 // transferase activity // inferred from electronic annotation /// 17174 // glycine N-methyltransferase a…	8652 // amino acid biosynthesis // inferred from electronic annotation	---	---
4981	146180_at	2.31435	0.570021	18.623	1.52e-18	3.73e-16	32.3275	FBgn0032281	CG17107	CG17107	CG17107	34467	---	---	---	---
1458	142657_at	2.28011	1.99345	10.1363	1.97e-11	4.21e-10	15.8506	FBgn0043578	CG9681	PGRP-SB1	PGRP-SB1	39870	4872 // receptor activity // inferred from electronic annotation /// 8745 // N-acetylmuramoyl-L-alanine amidase activity // inferred from electronic annotation /// 42834 // peptidoglycan binding // inferred from sequence or structural similarity /// 42834 // peptidoglycan binding // non-traceable author statement /// 5515 // protein binding // inferred from electronic annotation /// 8270 // zinc …	6952 // defense response // non-traceable author statement /// 6955 // immune response // inferred from sequence or structural similarity /// 9253 // peptidoglycan catabolism // inferred from electronic annotation /// 6955 // immune response // inferred from electronic annotation /// 45087 // innate immune response // inferred from electronic annotation /// 9253 // peptidoglycan catabolism // non…	5576 // extracellular region // inferred from sequence or structural similarity /// 5887 // integral to plasma membrane // non-traceable author statement /// 5576 // extracellular region // inferred from direct assay /// 5576 // extracellular region // inferred from sequence similarity	IPR002502 // N-acetylmuramoyl-L-alanine amidase, family 2 // 2.0E-64
6348	147547_at	2.26871	5.59971	15.7192	1.9e-16	2.09e-14	27.4993	FBgn0034512	CG18067	CG18067	CG18067	37314	---	---	---	---
5952	147151_at	2.26369	4.45083	10.8975	3.3e-12	9.02e-11	17.657	FBgn0033835	---	IM10	Immune induced molecule 10	36486	---	6952 // defense response // inferred from direct assay /// 8063 // Toll signaling pathway // non-traceable author statement /// 19731 // antibacterial humoral response // inferred from direct assay /// 6955 // immune response // inferred from electronic annotation /// 45087 // innate immune response // inferred from electronic annotation	5576 // extracellular region // inferred from direct assay	---
9870	151069_at	2.19975	4.21249	9.03319	3.01e-10	4.73e-09	13.0979	FBgn0040582	CG5791	CG5791	CG5791	50055	---	---	---	---
6315	147514_at	2.18774	0.76289	21.6649	1.82e-20	7.97e-18	36.7142	FBgn0034468	CG11797	Obp56a	Odorant-binding protein 56a	37264	5549 // odorant binding // inferred from sequence or structural similarity /// 5549 // odorant binding // non-traceable author statement /// 5515 // protein binding // inferred from physical interaction /// 5549 // odorant binding // inferred from electronic annotation /// 5549 // odorant binding // inferred from sequence similarity	7606 // sensory perception of chemical stimulus // inferred from sequence or structural similarity /// 7608 // sensory perception of smell // inferred from expression pattern /// 19236 // response to pheromone // inferred from sequence or structural similarity /// 42048 // olfactory behavior // inferred from sequence or structural similarity /// 6810 // transport // inferred from electronic annot…	5576 // extracellular region // inferred from sequence or structural similarity /// 5576 // extracellular region // inferred from sequence similarity	IPR006170 // Pheromone/general odorant binding protein, PBP/GOBP // 3.5E-31
11399	152598_at	2.15924	2.91714	17.5865	7.89e-18	1.44e-15	30.6834	FBgn0034335	CG5164	GstE1	Glutathione S transferase E1	37106	4364 // glutathione transferase activity // inferred from sequence or structural similarity /// 4364 // glutathione transferase activity // non-traceable author statement /// 5515 // protein binding // inferred from physical interaction /// 16740 // transferase activity // inferred from electronic annotation /// 4364 // glutathione transferase activity // inferred from sequence similarity	6952 // defense response // inferred from electronic annotation /// 6979 // response to oxidative stress // non-traceable author statement /// 9636 // response to toxin // inferred from electronic annotation	---	IPR004046 // Glutathione S-transferase, C-terminal // 4.7E-11 /// IPR004045 // Glutathione S-transferase, N-terminal // 1.1E-19
2636	143835_at	2.11773	2.62832	13.0688	2.98e-14	1.55e-12	22.4112	FBgn0015657	CG10578	DnaJ-1	DnaJ-like-1	38643	51082 // unfolded protein binding // inferred from electronic annotation /// 5515 // protein binding // inferred from physical interaction /// 31072 // heat shock protein binding // inferred from electronic annotation	6457 // protein folding // inferred from electronic annotation /// 6950 // response to stress // inferred from electronic annotation /// 6952 // defense response // inferred from electronic annotation /// 9408 // response to heat // inferred from sequence or structural similarity /// 6986 // response to unfolded protein // inferred from electronic annotation /// 9408 // response to heat // inferr…	5737 // cytoplasm // non-traceable author statement	IPR002939 // Chaperone DnaJ, C-terminal // 2.2E-9 /// IPR001623 // Heat shock protein DnaJ, N-terminal // 9.7E-39 /// IPR002939 // Chaperone DnaJ, C-terminal // 1.7E-6
7463	148662_at	2.04814	1.99986	26.5005	4.44e-23	3.28e-20	42.598	FBgn0036290	CG10638	CG10638	CG10638	39424	4032 // aldehyde reductase activity // inferred from sequence or structural similarity /// 16491 // oxidoreductase activity // inferred from electronic annotation /// 4032 // aldehyde reductase activity // inferred from sequence similarity	6081 // aldehyde metabolism // inferred from sequence or structural similarity /// 6081 // aldehyde metabolism // inferred from sequence similarity	---	IPR001395 // Aldo/keto reductase // 1.0E-126
5823	147022_at	2.01579	0.752555	12.6878	6.54e-14	3.09e-12	21.6177	FBgn0040503	CG7763	CG7763	CG7763	36235	5529 // sugar binding // inferred from electronic annotation	---	---	IPR001304 // C-type lectin // 2.6E-18
11923	153122_at	2.00871	3.47582	20.5266	8.91e-20	3.38e-17	35.1437	FBgn0000052	CG9127	ade2	adenosine 2	33847	4642 // phosphoribosylformylglycinamidine synthase activity // inferred from sequence or structural similarity /// 4642 // phosphoribosylformylglycinamidine synthase activity // non-traceable author statement /// 3824 // catalytic activity // inferred from electronic annotation /// 4642 // phosphoribosylformylglycinamidine synthase activity // inferred from electronic annotation /// 4642 // phosp…	6144 // purine base metabolism // inferred from electronic annotation /// 6189 // 'de novo' IMP biosynthesis // inferred from sequence or structural similarity /// 6189 // 'de novo' IMP biosynthesis // non-traceable author statement /// 6189 // 'de novo' IMP biosynthesis // inferred from electronic annotation /// 6189 // 'de novo' IMP biosynthesis // inferred from sequence similarity	---	IPR010918 // AIR synthase related protein, C-terminal // 2.2E-29 /// IPR010918 // AIR synthase related protein, C-terminal // 3.0E-14 /// IPR000728 // AIR synthase related protein // 1.3E-41
7285	148484_at	2.00865	3.43151	11.3992	1.06e-12	3.38e-11	18.8069	FBgn0036030	CG6767	CG6767	CG6767	39132	4749 // ribose phosphate diphosphokinase activity // inferred from sequence or structural similarity /// 16978 // lipoate-protein ligase B activity // inferred from electronic annotation /// 19201 // nucleotide kinase activity // inferred from electronic annotation /// 5515 // protein binding // inferred from physical interaction /// 42802 // identical protein binding // inferred from physical in…	6144 // purine base metabolism // inferred from electronic annotation /// 6206 // pyrimidine base metabolism // inferred from electronic annotation /// 9116 // nucleoside metabolism // inferred from electronic annotation /// 9156 // ribonucleoside monophosphate biosynthesis // inferred from electronic annotation /// 9165 // nucleotide biosynthesis // inferred from electronic annotation	---	IPR000836 // Phosphoribosyltransferase // 4.6E-38 /// IPR000836 // Phosphoribosyltransferase // 4.6E-38
1898	143097_f_at	1.96317	1.57254	9.43426	1.1e-10	1.93e-09	14.1172	FBgn0000277	CG1367	CecA2	Cecropin A2	43597	---	6961 // antibacterial humoral response (sensu Protostomia) // inferred from expression pattern /// 6961 // antibacterial humoral response (sensu Protostomia) // inferred from sequence or structural similarity /// 6961 // antibacterial humoral response (sensu Protostomia) // non-traceable author statement /// 42742 // defense response to bacteria // non-traceable author statement /// 50829 // defe…	5576 // extracellular region // inferred from electronic annotation	IPR000875 // Cecropin // 4.9E-21
5086	146285_at	1.90381	2.25696	15.7758	1.71e-16	1.94e-14	27.6002	FBgn0043841	CG31764	vir-1	virus-induced RNA 1	34652	---	---	---	---
2869	144068_at	1.89546	4.0017	11.2317	1.54e-12	4.69e-11	18.4264	FBgn0025583	CG18106	IM2	Immune induced molecule 2	49802	---	6952 // defense response // inferred from direct assay /// 6952 // defense response // non-traceable author statement /// 6955 // immune response // inferred from electronic annotation /// 45087 // innate immune response // inferred from electronic annotation	5576 // extracellular region // inferred from direct assay /// 5576 // extracellular region // non-traceable author statement	---
12328	153527_at	1.88125	2.33058	13.116	2.7e-14	1.44e-12	22.5083	FBgn0030309	CG1572	CG1572	CG1572	32098	---	---	16020 // membrane // inferred from electronic annotation	IPR008253 // Marvel // 1.7E-31
9136	150335_at	1.88086	0.904604	12.5681	8.4e-14	3.79e-12	21.365	FBgn0038914	CG17820	fit	female-specific independent of transformer	42578	---	---	---	---
1863	143062_at	1.85811	2.01652	17.7533	6.02e-18	1.17e-15	30.9536	FBgn0000053	CG31628	ade3	adenosine 3	33986	4637 // phosphoribosylamine-glycine ligase activity // inferred from sequence or structural similarity /// 4637 // phosphoribosylamine-glycine ligase activity // non-traceable author statement /// 4641 // phosphoribosylformylglycinamidine cyclo-ligase activity // inferred from sequence or structural similarity /// 4641 // phosphoribosylformylglycinamidine cyclo-ligase activity // non-traceable au…	6144 // purine base metabolism // inferred from electronic annotation /// 6189 // 'de novo' IMP biosynthesis // inferred from sequence or structural similarity /// 6189 // 'de novo' IMP biosynthesis // non-traceable author statement /// 9113 // purine base biosynthesis // inferred from electronic annotation /// 6189 // 'de novo' IMP biosynthesis // inferred from sequence similarity	5737 // cytoplasm // inferred from electronic annotation	IPR000115 // Phosphoribosylglycinamide synthetase // 7.3E-66 /// IPR010918 // AIR synthase related protein, C-terminal // 1.8E-24 /// IPR010918 // AIR synthase related protein, C-terminal // 1.8E-44 /// IPR002376 // Formyl transferase, N-terminal // 1.6E-101 /// IPR000115 // Phosphoribosylglycinamide synthetase // 2.9E-99 /// IPR000115 // Phosphoribosylglycinamide synthetase // 2.5E-50 /// IPR000…
10923	152122_at	1.84509	2.89166	11.0971	2.09e-12	6.13e-11	18.1183	FBgn0034296	CG10912	CG10912	CG10912	37059	---	---	---	IPR007931 // Protein of unknown function DUF725 // 1.3E-71
5207	146406_at	1.8254	0.459926	14.7495	1.11e-15	9.46e-14	25.7207	FBgn0032639	CG18563	CG18563	CG18563	35050	4252 // serine-type endopeptidase activity // non-traceable author statement /// 4295 // trypsin activity // inferred from electronic annotation /// 4252 // serine-type endopeptidase activity // inferred from electronic annotation	6508 // proteolysis // inferred from electronic annotation	---	IPR001254 // Peptidase S1, chymotrypsin // 1.4E-34 /// IPR001254 // Peptidase S1, chymotrypsin // 1.4E-34
6592	147791_at	1.81775	1.41114	7.67168	1.08e-08	1.19e-07	9.48514	FBgn0067903	CG10332 /// CG33706	IM18	Immune induced molecule 18	3772138	---	6952 // defense response // inferred from direct assay	5576 // extracellular region // inferred from direct assay	---
9483	150682_at	1.81049	4.01201	14.0237	4.44e-15	3.19e-13	24.3284	---	CG14245 /// CG14246	CG14245	CG14245	---	---	---	---	---
9367	150566_at	1.75974	1.37082	19.3366	5.1e-19	1.43e-16	33.4126	FBgn0039299	CG11854	CG11854	CG11854	43037	---	---	---	IPR004272 // Odorant binding protein // 2.9E-58
3322	144521_at	1.75608	3.06501	11.3863	1.09e-12	3.45e-11	18.7777	FBgn0029766	CG15784	CG15784	CG15784	31461	---	---	---	---
4704	145903_at	1.74723	-0.657064	9.275	1.63e-10	2.74e-09	13.715	FBgn0051638	CG31638	CG31638	CG31638	33910	---	---	16459 // myosin // inferred from sequence or structural similarity /// 16459 // myosin // inferred from sequence similarity	---
1897	143096_f_at	1.73148	2.35465	10.224	1.6e-11	3.55e-10	16.0624	FBgn0000276	CG1365	CecA1	Cecropin A1	43596	---	6961 // antibacterial humoral response (sensu Protostomia) // inferred from direct assay /// 6961 // antibacterial humoral response (sensu Protostomia) // inferred from expression pattern /// 6961 // antibacterial humoral response (sensu Protostomia) // inferred from sequence or structural similarity /// 6961 // antibacterial humoral response (sensu Protostomia) // non-traceable author statement …	5576 // extracellular region // inferred from direct assay	IPR000875 // Cecropin // 4.9E-21
10012	151211_at	1.72247	5.93469	8.63304	8.4e-10	1.18e-08	12.0601	FBgn0040736 /// FBgn0031035	CG16844	IM3 /// RpS10b	Immune induced molecule 3 /// Ribosomal protein S10b	32953 /// 50209	3676 // nucleic acid binding // inferred from electronic annotation /// 3735 // structural constituent of ribosome // inferred from sequence or structural similarity /// 3779 // actin binding // inferred from electronic annotation /// 5200 // structural constituent of cytoskeleton // inferred from electronic annotation /// 8017 // microtubule binding // inferred from electronic annotation /// 192…	6412 // protein biosynthesis // inferred from electronic annotation /// 7010 // cytoskeleton organization and biogenesis // inferred from electronic annotation /// 6952 // defense response // inferred from direct assay /// 8063 // Toll signaling pathway // non-traceable author statement /// 19731 // antibacterial humoral response // inferred from direct assay	5843 // cytosolic small ribosomal subunit (sensu Eukaryota) // inferred from sequence or structural similarity /// 5576 // extracellular region // inferred from direct assay /// 30529 // ribonucleoprotein complex // inferred from electronic annotation /// 5843 // cytosolic small ribosomal subunit (sensu Eukaryota) // inferred from sequence similarity	IPR005326 // Plectin/S10, N-terminal // 2.1E-77
10640	151839_at	1.72089	4.77673	12.8305	4.86e-14	2.37e-12	21.9167	FBgn0043841	CG31764	vir-1	virus-induced RNA 1	34652	---	---	---	---
4347	145546_i_at	1.66712	4.0455	8.31774	1.91e-09	2.48e-08	11.228	FBgn0031277	CG13947	CG13947	CG13947	33250	---	---	---	---
6232	147431_at	1.66665	4.35395	7.44243	2.01e-08	2.08e-07	8.85521	FBgn0034329	CG18108	IM1	Immune induced molecule 1	37100	---	6952 // defense response // inferred from direct assay	5576 // extracellular region // inferred from direct assay	---
7153	148352_at	1.65792	-0.0129997	14.6962	1.23e-15	1.01e-13	25.6203	FBgn0035806	CG7496	PGRP-SD	PGRP-SD	38858	8745 // N-acetylmuramoyl-L-alanine amidase activity // inferred from electronic annotation /// 42834 // peptidoglycan binding // inferred from sequence or structural similarity /// 42834 // peptidoglycan binding // non-traceable author statement /// 42834 // peptidoglycan binding // inferred from sequence similarity	6952 // defense response // non-traceable author statement /// 6955 // immune response // inferred from sequence or structural similarity /// 9253 // peptidoglycan catabolism // inferred from electronic annotation /// 9253 // peptidoglycan catabolism // non-traceable author statement /// 50830 // defense response to Gram-positive bacteria // inferred from direct assay /// 6955 // immune response …	5576 // extracellular region // inferred from sequence or structural similarity /// 5887 // integral to plasma membrane // non-traceable author statement /// 5576 // extracellular region // inferred from sequence similarity	IPR002502 // N-acetylmuramoyl-L-alanine amidase, family 2 // 4.0E-52
6231	147430_at	1.65711	0.660906	4.87474	2.97e-05	0.000152745	1.5518	FBgn0034328	CG15066	IM23	Immune induced molecule 23	37099	---	6952 // defense response // inferred from direct assay /// 8063 // Toll signaling pathway // non-traceable author statement /// 19731 // antibacterial humoral response // inferred from direct assay /// 6955 // immune response // inferred from electronic annotation /// 45087 // innate immune response // inferred from electronic annotation	5576 // extracellular region // inferred from direct assay	---
8319	149518_at	1.63507	1.64434	17.3365	1.19e-17	2.01e-15	30.2743	FBgn0037612	CG8112	CG8112	CG8112	41033	4772 // sterol O-acyltransferase activity // inferred from sequence or structural similarity /// 4772 // sterol O-acyltransferase activity // inferred from sequence similarity	8203 // cholesterol metabolism // inferred from electronic annotation	---	IPR004299 // Membrane bound O-acyl transferase, MBOAT // 4.7E-23
11169	152368_at	1.62176	3.31013	19.8301	2.45e-19	7.88e-17	34.142	FBgn0038465	CG8913	Irc	Immune-regulated catalase	42049	4601 // peroxidase activity // inferred from sequence or structural similarity /// 4601 // peroxidase activity // inferred from electronic annotation /// 5506 // iron ion binding // inferred from electronic annotation /// 16491 // oxidoreductase activity // inferred from electronic annotation /// 46872 // metal ion binding // inferred from electronic annotation /// 4601 // peroxidase activity // …	6800 // oxygen and reactive oxygen species metabolism // inferred from electronic annotation /// 6952 // defense response // inferred from electronic annotation	---	IPR002007 // Animal haem peroxidase // 1.1E-41 /// IPR002007 // Animal haem peroxidase // 7.5E-30
11951	153150_at	1.62176	2.90208	17.2898	1.28e-17	2.11e-15	30.1974	FBgn0014427	CG11899	CG11899	CG11899	46391	4648 // phosphoserine transaminase activity // inferred from sequence or structural similarity /// 4648 // phosphoserine transaminase activity // non-traceable author statement /// 5515 // protein binding // inferred from physical interaction /// 8483 // transaminase activity // inferred from electronic annotation /// 4648 // phosphoserine transaminase activity // inferred from electronic annotat…	6564 // L-serine biosynthesis // non-traceable author statement /// 8615 // pyridoxine biosynthesis // non-traceable author statement /// 6564 // L-serine biosynthesis // inferred from electronic annotation /// 8152 // metabolism // inferred from electronic annotation /// 8652 // amino acid biosynthesis // inferred from electronic annotation	---	IPR000192 // Aminotransferase, class V // 1.6E-86
10010	151209_at	1.59357	5.04802	8.67668	7.5e-10	1.07e-08	12.1743	FBgn0040734	CG15065	CG15065	CG15065	50207	---	---	---	---
154	141353_at	1.58814	2.00383	10.8064	4.07e-12	1.08e-10	17.4447	FBgn0038299	CG6687	Spn88Eb	Serpin 88Eb	41829	4867 // serine-type endopeptidase inhibitor activity // inferred from sequence or structural similarity /// 46933 // hydrogen-transporting ATP synthase activity, rotational mechanism // inferred from electronic annotation /// 46961 // hydrogen-transporting ATPase activity, rotational mechanism // inferred from electronic annotation /// 5515 // protein binding // inferred from physical interaction…	6508 // proteolysis // inferred from electronic annotation /// 15986 // ATP synthesis coupled proton transport // inferred from electronic annotation	16020 // membrane // inferred from electronic annotation /// 16469 // proton-transporting two-sector ATPase complex // inferred from electronic annotation	IPR000215 // Serpin // 4.7E-69
4108	145307_at	1.57101	1.93395	9.4631	1.02e-10	1.81e-09	14.1897	FBgn0030929	CG15043	CG15043	CG15043	32835	---	---	---	---
5058	146257_at	1.5648	2.71534	13.0896	2.85e-14	1.5e-12	22.4539	FBgn0032382	CG14935	Mal-B2	Maltase B2	34598	4556 // alpha-amylase activity // inferred from electronic annotation /// 4558 // alpha-glucosidase activity // inferred from sequence or structural similarity /// 5215 // transporter activity // inferred from electronic annotation /// 4558 // alpha-glucosidase activity // inferred from sequence similarity	5975 // carbohydrate metabolism // inferred from electronic annotation	---	IPR006047 // Alpha amylase, catalytic domain // 3.7E-113 /// IPR006047 // Alpha amylase, catalytic domain // 3.7E-113
12985	154184_at	1.56467	4.01528	16.3366	6.42e-17	8.48e-15	28.5857	FBgn0023129	CG3705	aay	astray	39085	4647 // phosphoserine phosphatase activity // inferred from sequence or structural similarity /// 4647 // phosphoserine phosphatase activity // non-traceable author statement /// 287 // magnesium ion binding // inferred from electronic annotation /// 3824 // catalytic activity // inferred from electronic annotation /// 4647 // phosphoserine phosphatase activity // inferred from electronic annotat…	6563 // L-serine metabolism // inferred from sequence or structural similarity /// 6564 // L-serine biosynthesis // non-traceable author statement /// 7411 // axon guidance // inferred from mutant phenotype /// 7422 // peripheral nervous system development // traceable author statement /// 6564 // L-serine biosynthesis // inferred from electronic annotation /// 8152 // metabolism // inferred from…	---	IPR005834 // Haloacid dehalogenase-like hydrolase // 5.7E-9
6500	147699_at	1.55174	2.82129	12.5794	8.2e-14	3.74e-12	21.3889	FBgn0034761	CG4250	CG4250	CG4250	37599	---	---	---	---
11084	152283_at	1.54427	2.70089	4.05705	0.000305472	0.0011806	-0.739999	FBgn0052549	CG32549	CG32549	CG32549	32822	8253 // 5'-nucleotidase activity // inferred from sequence or structural similarity /// 8253 // 5'-nucleotidase activity // inferred from sequence similarity	6139 // nucleobase, nucleoside, nucleotide and nucleic acid metabolism // inferred from sequence or structural similarity /// 6144 // purine base metabolism // inferred from electronic annotation /// 6139 // nucleobase, nucleoside, nucleotide and nucleic acid metabolism // inferred from sequence similarity	5829 // cytosol // inferred from sequence or structural similarity /// 5829 // cytosol // inferred from sequence similarity	IPR008380 // Purine 5-nucleotidase // 1.0E-126 /// IPR008380 // Purine 5-nucleotidase // 1.0E-126 /// IPR008380 // Purine 5-nucleotidase // 1.0E-126 /// IPR008380 // Purine 5-nucleotidase // 1.0E-126 /// IPR008380 // Purine 5-nucleotidase // 1.0E-126
11510	152709_at	1.53622	2.45678	13.2028	2.27e-14	1.26e-12	22.6862	FBgn0041194	CG10078	Prat2	Phosphoribosylamidotransferase 2	38753	4044 // amidophosphoribosyltransferase activity // inferred from sequence or structural similarity /// 4182 // carboxypeptidase A activity // inferred from electronic annotation /// 5515 // protein binding // inferred from physical interaction /// 4044 // amidophosphoribosyltransferase activity // inferred from electronic annotation /// 16740 // transferase activity // inferred from electronic an…	5996 // monosaccharide metabolism // inferred from electronic annotation /// 6144 // purine base metabolism // inferred from electronic annotation /// 6189 // 'de novo' IMP biosynthesis // inferred from sequence or structural similarity /// 6508 // proteolysis // inferred from electronic annotation /// 9113 // purine base biosynthesis // inferred from electronic annotation /// 9116 // nucleoside …	---	IPR000583 // Glutamine amidotransferase, class-II // 3.9E-48 /// IPR000836 // Phosphoribosyltransferase // 3.7E-7 /// IPR000583 // Glutamine amidotransferase, class-II // 1.3E-40 /// IPR000836 // Phosphoribosyltransferase // 3.7E-7
5998	147197_at	1.51811	0.945784	15.0594	6.27e-16	5.78e-14	26.2989	FBgn0033928	CG13941	Arc2	Arc2	36597	---	---	---	IPR005162 // Retrotransposon gag protein // 1.5E-6
12229	153428_at	1.51173	4.73518	19.8304	2.45e-19	7.88e-17	34.1425	FBgn0020513	CG3989	ade5	ade5	32228	4638 // phosphoribosylaminoimidazole carboxylase activity // inferred from sequence or structural similarity /// 4639 // phosphoribosylaminoimidazolesuccinocarboxamide synthase activity // inferred from sequence or structural similarity /// 42802 // identical protein binding // inferred from physical interaction /// 3824 // catalytic activity // inferred from electronic annotation /// 4638 // pho…	6144 // purine base metabolism // inferred from electronic annotation /// 6164 // purine nucleotide biosynthesis // inferred from electronic annotation /// 6189 // 'de novo' IMP biosynthesis // inferred from electronic annotation /// 9113 // purine base biosynthesis // inferred from genetic interaction	9320 // phosphoribosylaminoimidazole carboxylase complex // inferred from electronic annotation	IPR001636 // SAICAR synthetase // 2.4E-96 /// IPR000031 // 1-(5-Phosphoribosyl)-5-amino-4-imidazole-carboxylate (AIR) carboxylase // 2.8E-50
4348	145547_r_at	1.5043	3.3789	9.28268	1.6e-10	2.7e-09	13.7345	FBgn0031277	CG13947	CG13947	CG13947	33250	---	---	---	---
12384	153583_at	1.49773	1.92886	10.4682	8.97e-12	2.15e-10	16.6475	FBgn0001224	CG4463	Hsp23	Heat shock protein 23	39077	3779 // actin binding // inferred from sequence or structural similarity /// 5515 // protein binding // inferred from physical interaction /// 3779 // actin binding // inferred from sequence similarity	6457 // protein folding // inferred from electronic annotation /// 6952 // defense response // inferred from electronic annotation /// 9408 // response to heat // inferred from sequence or structural similarity /// 9408 // response to heat // non-traceable author statement /// 6986 // response to unfolded protein // inferred from electronic annotation /// 9408 // response to heat // inferred from…	---	IPR002068 // Heat shock protein Hsp20 // 5.6E-47
12742	153941_at	1.47841	1.41468	4.39417	0.000117845	0.000514815	0.193282	FBgn0037724 /// FBgn0003334	CG9434	Fst /// Scm	Frost /// Sex comb on midleg	41168 /// 41169	3682 // chromatin binding // inferred from electronic annotation /// 3704 // specific RNA polymerase II transcription factor activity // non-traceable author statement	9409 // response to cold // inferred from expression pattern /// 9409 // response to cold // non-traceable author statement /// 16458 // gene silencing // inferred from genetic interaction /// 16458 // gene silencing // inferred from mutant phenotype /// 30708 // female germ-line cyst encapsulation (sensu Insecta) // inferred from mutant phenotype /// 30713 // stalk formation (sensu Insecta) // i…	5634 // nucleus // non-traceable author statement /// 35102 // PRC1 complex // traceable author statement	---
8557	149756_at	1.46982	2.01697	9.03174	3.02e-10	4.74e-09	13.0942	FBgn0010038	CG4181	GstD2	Glutathione S transferase D2	48335	4364 // glutathione transferase activity // inferred from direct assay /// 4364 // glutathione transferase activity // inferred from sequence or structural similarity /// 4364 // glutathione transferase activity // non-traceable author statement /// 4602 // glutathione peroxidase activity // traceable author statement /// 4364 // glutathione transferase activity // inferred from sequence similari…	6952 // defense response // inferred from electronic annotation /// 9636 // response to toxin // inferred from electronic annotation	---	IPR004046 // Glutathione S-transferase, C-terminal // 8.6E-12 /// IPR004045 // Glutathione S-transferase, N-terminal // 6.4E-18
4815	146014_at	1.46093	0.882697	10.1711	1.82e-11	3.92e-10	15.9348	FBgn0032002	CG8353	CG8353	CG8353	34123	4126 // cytidine deaminase activity // inferred from sequence or structural similarity /// 8270 // zinc ion binding // inferred from electronic annotation /// 4126 // cytidine deaminase activity // inferred from electronic annotation /// 16787 // hydrolase activity // inferred from electronic annotation /// 4126 // cytidine deaminase activity // inferred from sequence similarity	6206 // pyrimidine base metabolism // inferred from electronic annotation /// 46087 // cytidine metabolism // inferred from electronic annotation	---	IPR002125 // Cytidine/deoxycytidylate deaminase, zinc-binding region // 1.4E-22
12166	153365_at	1.44744	2.84886	17.3164	1.23e-17	2.05e-15	30.2411	FBgn0032773	CG15825	fon	fondue	35211	---	---	---	---
12474	153673_at	1.43717	2.6869	15.4857	2.88e-16	2.97e-14	27.0791	FBgn0000083	CG5730	AnnIX	Annexin IX	42492	3779 // actin binding // inferred from sequence or structural similarity /// 5509 // calcium ion binding // inferred from sequence or structural similarity /// 5509 // calcium ion binding // non-traceable author statement /// 5543 // phospholipid binding // non-traceable author statement /// 5544 // calcium-dependent phospholipid binding // inferred from sequence or structural similarity /// 5515…	6629 // lipid metabolism // inferred from electronic annotation /// 50819 // negative regulation of coagulation // inferred from electronic annotation	---	IPR001464 // Annexin // 2.3E-30 /// IPR001464 // Annexin // 1.9E-29 /// IPR001464 // Annexin // 2.1E-26 /// IPR001464 // Annexin // 2.1E-27 /// IPR001464 // Annexin // 2.4E-32 /// IPR001464 // Annexin // 9.5E-24
1637	142836_at	1.43566	3.51267	9.67636	6.02e-11	1.13e-09	14.7223	FBgn0068141	CG4460 /// CG4456	Hsp67Bb	Hsp67Bb	---	---	8340 // determination of adult life span // inferred from mutant phenotype /// 9408 // response to heat // inferred from sequence or structural similarity /// 9408 // response to heat // non-traceable author statement /// 42026 // protein refolding // non-traceable author statement /// 6457 // protein folding // inferred from electronic annotation /// 6986 // response to unfolded protein // infer…	---	---
4771	145970_at	1.39159	2.26101	17.6314	7.33e-18	1.35e-15	30.7564	FBgn0041182	CG7052	TepII	Thiolester containing protein II	34044	4867 // serine-type endopeptidase inhibitor activity // inferred from electronic annotation /// 17114 // wide-spectrum protease inhibitor activity // inferred from sequence or structural similarity /// 4866 // endopeptidase inhibitor activity // inferred from electronic annotation /// 17114 // wide-spectrum protease inhibitor activity // inferred from sequence similarity	6961 // antibacterial humoral response (sensu Protostomia) // inferred from direct assay	---	IPR001599 // Alpha-2-macroglobulin // 1.4E-126 /// IPR001599 // Alpha-2-macroglobulin // 3.7E-15 /// IPR002890 // Alpha-2-macroglobulin, N-terminal // 4.1E-35 /// IPR002890 // Alpha-2-macroglobulin, N-terminal // 8.1E-13 /// IPR001599 // Alpha-2-macroglobulin // 1.7E-125 /// IPR001599 // Alpha-2-macroglobulin // 3.7E-15 /// IPR001599 // Alpha-2-macroglobulin // 2.3E-124 /// IPR001599 // Alpha-2-m…
11522	152721_at	1.39081	2.66617	19.257	5.75e-19	1.58e-16	33.2935	FBgn0020416	CG4472	Idgf1	Imaginal disc growth factor 1	34978	4568 // chitinase activity // inferred from sequence or structural similarity /// 8084 // imaginal disc growth factor activity // inferred from direct assay /// 16799 // hydrolase activity, hydrolyzing N-glycosyl compounds // inferred from electronic annotation /// 4553 // hydrolase activity, hydrolyzing O-glycosyl compounds // inferred from electronic annotation /// 4568 // chitinase activity //…	7165 // signal transduction // inferred from electronic annotation /// 7267 // cell-cell signaling // inferred from electronic annotation /// 7444 // imaginal disc development // inferred from direct assay /// 8152 // metabolism // inferred from electronic annotation /// 5975 // carbohydrate metabolism // inferred from electronic annotation /// 6032 // chitin catabolism // inferred from electroni…	5576 // extracellular region // inferred from direct assay /// 5576 // extracellular region // non-traceable author statement	IPR001223 // Glycoside hydrolase, family 18 // 7.9E-86
8023	149222_at	1.37782	1.19755	11.4432	9.59e-13	3.1e-11	18.9063	FBgn0037151	CG7130	CG7130	CG7130	40450	42623 // ATPase activity, coupled // inferred from electronic annotation /// 51082 // unfolded protein binding // inferred from electronic annotation	6457 // protein folding // inferred from electronic annotation /// 6950 // response to stress // inferred from electronic annotation /// 6952 // defense response // inferred from electronic annotation /// 9408 // response to heat // inferred from sequence or structural similarity /// 9408 // response to heat // inferred from sequence similarity	---	IPR001623 // Heat shock protein DnaJ, N-terminal // 9.4E-33
11945	153144_at	1.37311	3.20177	10.1735	1.8e-11	3.9e-10	15.9405	FBgn0014455	CG11654	Ahcy13	Adenosylhomocysteinase at 13	32471	4013 // adenosylhomocysteinase activity // inferred from sequence or structural similarity /// 4013 // adenosylhomocysteinase activity // non-traceable author statement /// 4013 // adenosylhomocysteinase activity // inferred from electronic annotation /// 16787 // hydrolase activity // inferred from electronic annotation /// 4013 // adenosylhomocysteinase activity // inferred from sequence simila…	6144 // purine base metabolism // inferred from electronic annotation /// 6730 // one-carbon compound metabolism // inferred from electronic annotation	---	IPR000043 // S-adenosyl-L-homocysteine hydrolase // 2.6E-116 /// IPR000043 // S-adenosyl-L-homocysteine hydrolase // 7.9E-88 /// IPR000043 // S-adenosyl-L-homocysteine hydrolase // 6.4E-69
8842	150041_at	1.35884	1.62642	15.9086	1.36e-16	1.58e-14	27.8362	FBgn0038467	CG3590	CG3590	CG3590	42051	4018 // adenylosuccinate lyase activity // inferred from sequence or structural similarity /// 3824 // catalytic activity // inferred from electronic annotation /// 4018 // adenylosuccinate lyase activity // inferred from electronic annotation /// 16829 // lyase activity // inferred from electronic annotation /// 4018 // adenylosuccinate lyase activity // inferred from sequence similarity	6144 // purine base metabolism // inferred from electronic annotation /// 9152 // purine ribonucleotide biosynthesis // inferred from electronic annotation	---	IPR000362 // Fumarate lyase // 6.3E-70
11628	152827_at	1.35834	1.10759	10.9485	2.94e-12	8.23e-11	17.7753	FBgn0037906	CG14704	PGRP-LB	Peptidoglycan recognition protein LB	41379	4040 // amidase activity // non-traceable author statement /// 5515 // protein binding // inferred from electronic annotation /// 5515 // protein binding // inferred from physical interaction /// 8745 // N-acetylmuramoyl-L-alanine amidase activity // inferred from electronic annotation /// 42834 // peptidoglycan binding // inferred from sequence or structural similarity /// 42834 // peptidoglycan…	270 // peptidoglycan metabolism // non-traceable author statement /// 6952 // defense response // non-traceable author statement /// 6955 // immune response // inferred from sequence or structural similarity /// 9253 // peptidoglycan catabolism // inferred from electronic annotation /// 16045 // detection of bacteria // non-traceable author statement /// 50830 // defense response to Gram-positive…	5576 // extracellular region // inferred from direct assay /// 5887 // integral to plasma membrane // non-traceable author statement	IPR002502 // N-acetylmuramoyl-L-alanine amidase, family 2 // 2.3E-65 /// IPR002502 // N-acetylmuramoyl-L-alanine amidase, family 2 // 2.3E-65
10623	151822_at	1.35596	2.08941	9.51351	9e-11	1.61e-09	14.3161	FBgn0014018	CG11992	Rel	Relish	41087	3700 // transcription factor activity // non-traceable author statement /// 3700 // transcription factor activity // traceable author statement /// 3704 // specific RNA polymerase II transcription factor activity // non-traceable author statement /// 5515 // protein binding // inferred from physical interaction /// 30528 // transcription regulator activity // inferred from electronic annotation /…	6357 // regulation of transcription from RNA polymerase II promoter // inferred from electronic annotation /// 6955 // immune response // inferred from expression pattern /// 6955 // immune response // traceable author statement /// 6963 // antibacterial polypeptide induction // inferred from expression pattern /// 6963 // antibacterial polypeptide induction // inferred from mutant phenotype /// …	5634 // nucleus // inferred from direct assay /// 5634 // nucleus // non-traceable author statement /// 5737 // cytoplasm // inferred from direct assay /// 5739 // mitochondrion // inferred from sequence or structural similarity /// 5739 // mitochondrion // inferred from electronic annotation /// 5634 // nucleus // inferred from electronic annotation	IPR000451 // NF-kappa-B/Rel/dorsal // 1.1E-98 /// IPR002110 // Ankyrin // 4.1E-7 /// IPR002110 // Ankyrin // 3.9E-4 /// IPR002110 // Ankyrin // 3.5E-5 /// IPR002110 // Ankyrin // 0.058 /// IPR002110 // Ankyrin // 6.7 /// IPR002909 // Cell surface receptor IPT/TIG // 5.5E-8 /// IPR000451 // NF-kappa-B/Rel/dorsal // 1.1E-98 /// IPR002110 // Ankyrin // 4.1E-7 /// IPR002110 // Ankyrin // 3.9E-4 /// I…
5795	146994_at	1.35472	3.04714	12.7316	5.97e-14	2.84e-12	21.7098	---	CG7738	---	---	---	5515 // protein binding // inferred from physical interaction	---	---	---
1997	143196_at	1.34564	0.902944	16.8114	2.85e-17	4.04e-15	29.3982	FBgn0001229	CG4190	Hsp67Bc	Heat shock gene 67Bc	39071	---	6457 // protein folding // inferred from electronic annotation /// 6950 // response to stress // inferred from electronic annotation /// 6952 // defense response // inferred from electronic annotation /// 9408 // response to heat // inferred from sequence or structural similarity /// 9408 // response to heat // non-traceable author statement /// 9408 // response to heat // inferred from sequence …	---	IPR002068 // Heat shock protein Hsp20 // 1.5E-30
10851	152050_at	1.34563	3.28773	12.2119	1.79e-13	7.19e-12	20.6029	FBgn0037057	CG10512	CG10512	CG10512	40339	16491 // oxidoreductase activity // inferred from electronic annotation	5975 // carbohydrate metabolism // inferred from electronic annotation /// 6099 // tricarboxylic acid cycle // inferred from electronic annotation /// 8152 // metabolism // inferred from electronic annotation	---	IPR003767 // Malate/L-lactate dehydrogenase // 5.5E-89 /// IPR003767 // Malate/L-lactate dehydrogenase // 5.5E-89 /// IPR003767 // Malate/L-lactate dehydrogenase // 5.5E-89
10956	152155_at	1.34101	2.6102	19.4046	4.61e-19	1.34e-16	33.5142	FBgn0032899	CG9338	CG9338	CG9338	35357	---	---	---	---
2039	143238_at	1.33295	0.374572	20.1908	1.45e-19	5.19e-17	34.6648	FBgn0002562	CG2559	Lsp1	Larval serum protein 1	32199	5344 // oxygen transporter activity // inferred from electronic annotation /// 45735 // nutrient reservoir activity // non-traceable author statement	6810 // transport // inferred from electronic annotation	5576 // extracellular region // non-traceable author statement /// 5616 // larval serum protein complex // inferred from direct assay /// 5616 // larval serum protein complex // inferred from sequence or structural similarity /// 5616 // larval serum protein complex // inferred from sequence similarity	IPR000896 // Arthropod hemocyanin/insect LSP // 1.0E-95 /// IPR005204 // Hemocyanin, N-terminal // 1.6E-6 /// IPR005204 // Hemocyanin, N-terminal // 2.6E-32 /// IPR005203 // Hemocyanin, C-terminal // 1.9E-103
9549	150748_at	1.33105	1.23153	22.3178	7.56e-21	3.65e-18	37.58	FBgn0039544	CG12877	CG12877	CG12877	43333	3676 // nucleic acid binding // inferred from electronic annotation /// 4518 // nuclease activity // inferred from electronic annotation /// 4532 // exoribonuclease activity // inferred from electronic annotation /// 4527 // exonuclease activity // inferred from electronic annotation /// 16787 // hydrolase activity // inferred from electronic annotation	6139 // nucleobase, nucleoside, nucleotide and nucleic acid metabolism // inferred from electronic annotation	5622 // intracellular // inferred from electronic annotation /// 5634 // nucleus // inferred from electronic annotation	IPR006055 // Exonuclease // 5.6E-11 /// IPR006055 // Exonuclease // 1.1E-14 /// IPR006055 // Exonuclease // 5.6E-11 /// IPR006055 // Exonuclease // 1.1E-14
5386	146585_at	1.32569	1.614	10.4501	9.36e-12	2.24e-10	16.6045	FBgn0032945	CG8665	CG8665	CG8665	35407	16155 // formyltetrahydrofolate dehydrogenase activity // inferred from sequence or structural similarity /// 16742 // hydroxymethyl-, formyl- and related transferase activity // inferred from electronic annotation /// 48037 // cofactor binding // inferred from electronic annotation /// 16155 // formyltetrahydrofolate dehydrogenase activity // inferred from electronic annotation /// 16491 // oxid…	6730 // one-carbon compound metabolism // inferred from electronic annotation /// 9058 // biosynthesis // inferred from electronic annotation /// 9063 // amino acid catabolism // inferred from electronic annotation /// 9258 // 10-formyltetrahydrofolate catabolism // inferred from electronic annotation /// 8152 // metabolism // inferred from electronic annotation	5737 // cytoplasm // inferred from electronic annotation	IPR005793 // Formyl transferase, C-terminal // 2.6E-6 /// IPR002376 // Formyl transferase, N-terminal // 3.8E-40 /// IPR002086 // Aldehyde dehydrogenase // 1.0E-126
2634	143833_at	1.32027	0.430061	11.9585	3.09e-13	1.14e-11	20.0515	FBgn0015621	CG3642	Clp	Clipper	33259	3676 // nucleic acid binding // inferred from electronic annotation /// 4521 // endoribonuclease activity // inferred from direct assay /// 5515 // protein binding // inferred from physical interaction /// 8270 // zinc ion binding // inferred from electronic annotation	6378 // mRNA polyadenylylation // inferred from sequence or structural similarity /// 6379 // mRNA cleavage // inferred from sequence or structural similarity /// 6378 // mRNA polyadenylylation // inferred from sequence similarity /// 6379 // mRNA cleavage // inferred from sequence similarity	5847 // mRNA cleavage and polyadenylation specificity factor complex // inferred from sequence or structural similarity /// 5847 // mRNA cleavage and polyadenylation specificity factor complex // inferred from sequence similarity	IPR001878 // Zn-finger, CCHC type // 8.0E-5 /// IPR001878 // Zn-finger, CCHC type // 1.4E-6 /// IPR000571 // Zn-finger, C-x8-C-x5-C-x3-H type // 1.3E-7
1346	142545_at	1.31597	2.32481	15.3029	4.01e-16	3.93e-14	26.7467	FBgn0010173	CG9633	RpA-70	Replication Protein A 70	40972	3697 // single-stranded DNA binding // inferred from direct assay /// 3697 // single-stranded DNA binding // non-traceable author statement /// 3676 // nucleic acid binding // inferred from electronic annotation /// 3677 // DNA binding // inferred from electronic annotation /// 8270 // zinc ion binding // inferred from electronic annotation /// 46872 // metal ion binding // inferred from electron…	6261 // DNA-dependent DNA replication // inferred from direct assay /// 6261 // DNA-dependent DNA replication // non-traceable author statement /// 6260 // DNA replication // inferred from electronic annotation	5634 // nucleus // inferred from direct assay /// 5634 // nucleus // non-traceable author statement /// 5662 // DNA replication factor A complex // inferred from direct assay /// 5662 // DNA replication factor A complex // non-traceable author statement /// 5634 // nucleus // inferred from electronic annotation	IPR004365 // OB-fold nucleic acid binding domain // 4.5E-17 /// IPR007199 // Replication factor-A protein 1, N-terminal // 3.6E-53
11419	152618_at	1.29917	1.57169	12.5066	9.56e-14	4.23e-12	21.2345	FBgn0033134	CG12840	Tsp42El	Tetraspanin 42El	35622	5057 // receptor signaling protein activity // inferred from electronic annotation /// 5515 // protein binding // inferred from physical interaction	7398 // ectoderm development // inferred from electronic annotation /// 7399 // nervous system development // inferred from electronic annotation /// 19226 // transmission of nerve impulse // inferred from electronic annotation /// 7416 // synaptogenesis // inferred from mutant phenotype	16021 // integral to membrane // inferred from sequence or structural similarity /// 5576 // extracellular region // inferred from direct assay /// 16020 // membrane // inferred from electronic annotation /// 16021 // integral to membrane // inferred from electronic annotation /// 45202 // synapse // inferred from electronic annotation /// 16021 // integral to membrane // inferred from sequence s…	IPR000301 // CD9/CD37/CD63 antigen // 1.5E-29
4805	146004_at	1.29185	2.71836	10.5156	8.02e-12	1.95e-10	16.76	FBgn0031977	CG7380	baf	barrier to autointegration factor	34095	3677 // DNA binding // non-traceable author statement /// 5515 // protein binding // inferred from physical interaction /// 3677 // DNA binding // inferred from electronic annotation	---	5634 // nucleus // non-traceable author statement /// 5634 // nucleus // inferred from electronic annotation	IPR004122 // Barrier to autointegration factor, BAF // 5.1E-90
2074	143273_at	1.28696	4.31485	16.6283	3.89e-17	5.34e-15	29.0871	FBgn0002856	CG9024	Acp26Ab	Accessory gland-specific peptide 26Ab	33816	5179 // hormone activity // non-traceable author statement	18991 // oviposition // non-traceable author statement /// 45297 // post-mating behavior // non-traceable author statement /// 7610 // behavior // inferred from electronic annotation /// 7617 // mating behavior // inferred from electronic annotation	5576 // extracellular region // non-traceable author statement /// 5576 // extracellular region // inferred from electronic annotation	IPR008392 // Drosophila accessory gland-specific peptide 26Ab // 4.4E-79
3362	144561_at	1.28388	2.08364	9.14477	2.27e-10	3.7e-09	13.3836	FBgn0029823	CG3011	CG3011	CG3011	31524	4372 // glycine hydroxymethyltransferase activity // inferred from sequence or structural similarity /// 5515 // protein binding // inferred from physical interaction /// 4372 // glycine hydroxymethyltransferase activity // inferred from electronic annotation /// 4372 // glycine hydroxymethyltransferase activity // inferred from sequence similarity	6139 // nucleobase, nucleoside, nucleotide and nucleic acid metabolism // inferred from electronic annotation /// 6544 // glycine metabolism // inferred from electronic annotation /// 6564 // L-serine biosynthesis // inferred from sequence or structural similarity /// 6563 // L-serine metabolism // inferred from electronic annotation /// 6564 // L-serine biosynthesis // inferred from sequence sim…	5739 // mitochondrion // inferred from sequence or structural similarity /// 5739 // mitochondrion // inferred from sequence similarity	IPR001085 // Glycine hydroxymethyltransferase // 1.0E-126
3525	144724_at	1.28059	2.73626	15.2006	4.84e-16	4.64e-14	26.5593	FBgn0030079	CG7267	CG7267	CG7267	31831	---	---	---	---
4533	145732_at	1.26554	1.3183	14.0423	4.29e-15	3.1e-13	24.3646	FBgn0031562	CG3604	CG3604	CG3604	33593	4867 // serine-type endopeptidase inhibitor activity // inferred from sequence or structural similarity /// 4867 // serine-type endopeptidase inhibitor activity // inferred from electronic annotation /// 4867 // serine-type endopeptidase inhibitor activity // inferred from sequence similarity	---	---	IPR002223 // Pancreatic trypsin inhibitor (Kunitz) // 9.4E-30
9315	150514_at	1.26549	2.41317	16.3102	6.72e-17	8.8e-15	28.5399	FBgn0039203	CG13618	CG13618	CG13618	42924	---	---	---	IPR004272 // Odorant binding protein // 9.3E-60
4531	145730_at	1.25635	2.77569	7.31229	2.88e-08	2.87e-07	8.49509	FBgn0031560	CG16713	CG16713	CG16713	33591	4867 // serine-type endopeptidase inhibitor activity // inferred from sequence or structural similarity /// 4867 // serine-type endopeptidase inhibitor activity // inferred from sequence similarity	---	---	IPR002223 // Pancreatic trypsin inhibitor (Kunitz) // 2.4E-21
10631	151830_at	1.25477	3.46679	12.4886	9.93e-14	4.35e-12	21.1961	FBgn0011296	CG4533	l(2)efl	lethal (2) essential for life	37744	42802 // identical protein binding // inferred from physical interaction	6457 // protein folding // inferred from electronic annotation /// 6950 // response to stress // inferred from electronic annotation /// 6952 // defense response // inferred from electronic annotation /// 9408 // response to heat // non-traceable author statement /// 9790 // embryonic development // non-traceable author statement /// 6986 // response to unfolded protein // inferred from electroni…	---	IPR002068 // Heat shock protein Hsp20 // 1.0E-18 /// IPR002068 // Heat shock protein Hsp20 // 1.2E-35 /// IPR002068 // Heat shock protein Hsp20 // 6.7E-19
284	141483_at	1.23815	3.26242	8.71813	6.74e-10	9.68e-09	12.2825	FBgn0038661	CG17836	Xrp1	Xrp1	42267	3677 // DNA binding // inferred from electronic annotation /// 46983 // protein dimerization activity // inferred from sequence or structural similarity /// 46983 // protein dimerization activity // inferred from sequence similarity	6355 // regulation of transcription, DNA-dependent // inferred from electronic annotation /// 50875 // cellular physiological process // inferred from mutant phenotype	5634 // nucleus // inferred from electronic annotation	---
10234	151433_at	1.22564	1.67869	6.42758	3.42e-07	2.74e-06	6.00559	FBgn0040972	CG16978	CG16978	CG16978	50446	---	---	---	---
9913	151112_s_at	1.21902	0.878912	14.3795	2.24e-15	1.73e-13	25.0177	---	---	---	---	---	---	---	---	IPR009882 // Gypsy // 1.0E-126
2469	143668_at	1.20538	1.70838	17.9448	4.42e-18	9.11e-16	31.2612	FBgn0011638	CG10922	La	La autoantigen-like	35305	3718 // RNA polymerase III transcription termination factor activity // inferred from sequence or structural similarity /// 3718 // RNA polymerase III transcription termination factor activity // non-traceable author statement /// 3729 // mRNA binding // inferred from sequence or structural similarity /// 3729 // mRNA binding // non-traceable author statement /// 8098 // 5S rRNA primary transcrip…	6396 // RNA processing // inferred from electronic annotation /// 6399 // tRNA metabolism // inferred from electronic annotation /// 6405 // RNA export from nucleus // inferred from electronic annotation	5634 // nucleus // non-traceable author statement /// 5737 // cytoplasm // inferred from electronic annotation /// 30529 // ribonucleoprotein complex // inferred from electronic annotation /// 5634 // nucleus // inferred from electronic annotation	IPR000504 // RNA-binding region RNP-1 (RNA recognition motif) // 2.7E-11 /// IPR006630 // RNA-binding protein Lupus Lal // 8.0E-35
12380	153579_at	1.19769	0.884565	18.8312	1.1e-18	2.91e-16	32.6479	FBgn0011703	CG5371	RnrL	Ribonucleoside diphosphate reductase large subunit	34392	4748 // ribonucleoside-diphosphate reductase activity // inferred from sequence or structural similarity /// 4748 // ribonucleoside-diphosphate reductase activity // non-traceable author statement /// 166 // nucleotide binding // inferred from electronic annotation /// 3824 // catalytic activity // inferred from electronic annotation /// 4748 // ribonucleoside-diphosphate reductase activity // in…	6144 // purine base metabolism // inferred from electronic annotation /// 6206 // pyrimidine base metabolism // inferred from electronic annotation /// 6260 // DNA replication // non-traceable author statement /// 6260 // DNA replication // inferred from electronic annotation	5971 // ribonucleoside-diphosphate reductase complex // inferred from sequence or structural similarity /// 5971 // ribonucleoside-diphosphate reductase complex // inferred from electronic annotation /// 5971 // ribonucleoside-diphosphate reductase complex // inferred from sequence similarity	IPR000788 // Ribonucleotide reductase large subunit // 1.0E-126 /// IPR005144 // ATP cone domain // 5.1E-26 /// IPR000788 // Ribonucleotide reductase large subunit // 8.8E-34
5509	146708_at	1.19075	3.52523	11.426	9.97e-13	3.21e-11	18.8675	FBgn0029507	CG12846	Tsp42Ed	Tetraspanin 42Ed	35613	---	---	16021 // integral to membrane // inferred from sequence or structural similarity /// 16021 // integral to membrane // inferred from electronic annotation /// 16021 // integral to membrane // inferred from sequence similarity	IPR000301 // CD9/CD37/CD63 antigen // 1.4E-59
5360	146559_at	1.18855	4.53868	14.6302	1.39e-15	1.11e-13	25.4955	FBgn0032897	CG9336	CG9336	CG9336	35355	---	---	---	---
9195	150394_at	1.18565	1.58628	15.3081	3.97e-16	3.92e-14	26.7563	FBgn0039008	CG6972	CG6972	CG6972	42684	---	---	---	---
5512	146711_at	1.18199	1.68561	18.7089	1.33e-18	3.45e-16	32.4601	FBgn0033129	CG12844	Tsp42Eh	Tetraspanin 42Eh	35617	---	---	16021 // integral to membrane // inferred from sequence or structural similarity /// 16021 // integral to membrane // inferred from electronic annotation /// 16021 // integral to membrane // inferred from sequence similarity	IPR000301 // CD9/CD37/CD63 antigen // 3.3E-17 /// IPR000301 // CD9/CD37/CD63 antigen // 4.6E-24
12235	153434_at	1.17645	3.6519	13.1002	2.79e-14	1.47e-12	22.4757	FBgn0001208	CG7399	Hn	Henna	38871	4505 // phenylalanine 4-monooxygenase activity // inferred from direct assay /// 4505 // phenylalanine 4-monooxygenase activity // inferred from mutant phenotype /// 4505 // phenylalanine 4-monooxygenase activity // inferred from sequence or structural similarity /// 4505 // phenylalanine 4-monooxygenase activity // non-traceable author statement /// 4510 // tryptophan 5-monooxygenase activity //…	6559 // L-phenylalanine catabolism // inferred from mutant phenotype /// 6559 // L-phenylalanine catabolism // non-traceable author statement /// 6726 // eye pigment biosynthesis // inferred from direct assay /// 7165 // signal transduction // inferred from electronic annotation /// 6559 // L-phenylalanine catabolism // inferred from electronic annotation /// 6587 // serotonin biosynthesis from t…	---	IPR001273 // Aromatic amino acid hydroxylase // 1.0E-126 /// IPR002912 // Amino acid-binding ACT // 1.4E-7 /// IPR001273 // Aromatic amino acid hydroxylase // 1.0E-126 /// IPR002912 // Amino acid-binding ACT // 1.4E-7 /// IPR001273 // Aromatic amino acid hydroxylase // 1.0E-126
102	141301_at	1.17297	2.70587	17.2004	1.49e-17	2.34e-15	30.0493	FBgn0004885	CG6863	tok	tolkin	42944	5509 // calcium ion binding // inferred from electronic annotation /// 8270 // zinc ion binding // inferred from electronic annotation /// 8533 // astacin activity // inferred from electronic annotation /// 17026 // procollagen C-endopeptidase activity // inferred from sequence or structural similarity /// 8237 // metallopeptidase activity // inferred from electronic annotation /// 17026 // proco…	6508 // proteolysis // inferred from electronic annotation /// 9950 // dorsal/ventral axis specification // inferred from electronic annotation	---	IPR001506 // Peptidase M12A, astacin // 4.0E-120 /// IPR006209 // EGF-like domain // 1.5E-8 /// IPR006209 // EGF-like domain // 1.6E-7 /// IPR000859 // CUB // 6.5E-34 /// IPR000859 // CUB // 9.0E-57 /// IPR000859 // CUB // 2.9E-46 /// IPR000859 // CUB // 1.8E-51 /// IPR000859 // CUB // 1.7E-32
13227	154426_at	1.15882	1.83075	12.2453	1.66e-13	6.74e-12	20.675	FBgn0028519	CG4500	CG4500	CG4500	34822	4467 // long-chain-fatty-acid-CoA ligase activity // inferred from sequence or structural similarity /// 3824 // catalytic activity // inferred from electronic annotation /// 4467 // long-chain-fatty-acid-CoA ligase activity // inferred from sequence similarity	6631 // fatty acid metabolism // inferred from electronic annotation /// 7498 // mesoderm development // inferred from expression pattern /// 8152 // metabolism // inferred from electronic annotation	---	IPR000873 // AMP-dependent synthetase and ligase // 3.4E-83
11470	152669_at	1.15384	2.84327	10.1763	1.79e-11	3.88e-10	15.9475	FBgn0020385	CG4067	pug	pugilist	41279	4329 // formate-tetrahydrofolate ligase activity // inferred from sequence or structural similarity /// 4477 // methenyltetrahydrofolate cyclohydrolase activity // inferred from sequence or structural similarity /// 4488 // methylenetetrahydrofolate dehydrogenase (NADP+) activity // inferred from sequence or structural similarity /// 5524 // ATP binding // inferred from electronic annotation /// …	8652 // amino acid biosynthesis // inferred from electronic annotation /// 9396 // folic acid and derivative biosynthesis // inferred from electronic annotation /// 105 // histidine biosynthesis // inferred from electronic annotation /// 6164 // purine nucleotide biosynthesis // inferred from electronic annotation /// 6730 // one-carbon compound metabolism // inferred from electronic annotation /…	5737 // cytoplasm // inferred from direct assay	IPR000559 // Formate-tetrahydrofolate ligase, FTHFS // 1.0E-126 /// IPR000672 // Tetrahydrofolate dehydrogenase/cyclohydrolase // 1.0E-80 /// IPR000672 // Tetrahydrofolate dehydrogenase/cyclohydrolase // 4.0E-114 /// IPR000559 // Formate-tetrahydrofolate ligase, FTHFS // 1.0E-126 /// IPR000672 // Tetrahydrofolate dehydrogenase/cyclohydrolase // 1.0E-80 /// IPR000672 // Tetrahydrofolate dehydrogen…
7440	148639_at	1.15226	4.5425	14.7196	1.18e-15	9.77e-14	25.6643	FBgn0036262	CG6910	CG6910	CG6910	39391	16491 // oxidoreductase activity // inferred from electronic annotation	5975 // carbohydrate metabolism // inferred from electronic annotation /// 6139 // nucleobase, nucleoside, nucleotide and nucleic acid metabolism // inferred from electronic annotation	---	IPR007828 // Protein of unknown function DUF706 // 1.0E-126
13472	154671_at	1.14432	1.10184	13.3791	1.59e-14	9.43e-13	23.045	FBgn0039094	CG10184	CG10184	CG10184	42783	4793 // threonine aldolase activity // inferred from sequence or structural similarity /// 16829 // lyase activity // inferred from electronic annotation /// 4793 // threonine aldolase activity // inferred from sequence similarity	9063 // amino acid catabolism // inferred from electronic annotation /// 9072 // aromatic amino acid family metabolism // inferred from electronic annotation /// 6520 // amino acid metabolism // inferred from electronic annotation	---	---
4901	146100_at	1.14398	0.972019	10.5065	8.2e-12	1.99e-10	16.7385	FBgn0032140	CG13117	CG13117	CG13117	34289	5515 // protein binding // inferred from physical interaction	---	---	---
533	141732_at	1.14001	3.22404	9.70115	5.67e-11	1.07e-09	14.7838	FBgn0004210	CG7850	puc	puckered	40958	4721 // phosphoprotein phosphatase activity // inferred from direct assay /// 4725 // protein tyrosine phosphatase activity // inferred from sequence or structural similarity /// 8138 // protein tyrosine/serine/threonine phosphatase activity // inferred from sequence or structural similarity /// 8138 // protein tyrosine/serine/threonine phosphatase activity // non-traceable author statement /// 8…	165 // MAPKKK cascade // inferred from electronic annotation /// 1736 // establishment of planar polarity // non-traceable author statement /// 6470 // protein amino acid dephosphorylation // inferred from direct assay /// 6470 // protein amino acid dephosphorylation // inferred from sequence or structural similarity /// 6470 // protein amino acid dephosphorylation // non-traceable author stateme…	---	IPR000340 // Dual specificity protein phosphatase // 2.4E-45
12764	153963_at	1.133	1.75649	12.2476	1.66e-13	6.74e-12	20.68	FBgn0053229	CG33229	CG33229	CG33229	2768996	---	---	---	---
12618	153817_at	1.13141	3.81957	17.8477	5.17e-18	1.03e-15	31.1056	FBgn0003514	CG3595	sqh	spaghetti squash	31554	5509 // calcium ion binding // non-traceable author statement /// 5516 // calmodulin binding // inferred from electronic annotation /// 42623 // ATPase activity, coupled // inferred from sequence or structural similarity /// 5509 // calcium ion binding // inferred from electronic annotation /// 42623 // ATPase activity, coupled // inferred from sequence similarity	910 // cytokinesis // inferred from mutant phenotype /// 910 // cytokinesis // non-traceable author statement /// 910 // cytokinesis // traceable author statement /// 1736 // establishment of planar polarity // non-traceable author statement /// 6936 // muscle contraction // inferred from electronic annotation /// 7298 // border follicle cell migration (sensu Insecta) // inferred from mutant phen…	16461 // unconventional myosin // inferred from sequence or structural similarity /// 16461 // unconventional myosin // non-traceable author statement /// 16461 // unconventional myosin // inferred from sequence similarity	IPR002048 // Calcium-binding EF-hand // 1.1E-7
8837	150036_at	1.13015	1.9021	12.1112	2.22e-13	8.66e-12	20.3847	FBgn0038455	CG14907	CG14907	CG14907	42031	8168 // methyltransferase activity // inferred from electronic annotation	6139 // nucleobase, nucleoside, nucleotide and nucleic acid metabolism // inferred from electronic annotation	5634 // nucleus // inferred from electronic annotation	---
1901	143100_f_at	1.12941	-0.0443849	7.3244	2.78e-08	2.78e-07	8.52869	FBgn0000279	CG1373	CecC	Cecropin C	43599	---	6961 // antibacterial humoral response (sensu Protostomia) // inferred from direct assay /// 6961 // antibacterial humoral response (sensu Protostomia) // non-traceable author statement /// 42742 // defense response to bacteria // non-traceable author statement /// 42742 // defense response to bacteria // traceable author statement /// 50829 // defense response to Gram-negative bacteria // inferr…	5576 // extracellular region // inferred from direct assay /// 5576 // extracellular region // inferred from electronic annotation	IPR000875 // Cecropin // 9.9E-20
5362	146561_at	1.12586	2.13922	14.6869	1.25e-15	1.01e-13	25.6027	FBgn0032900	CG14401	CG14401	CG14401	35358	---	---	---	---
2202	143401_at	1.11872	2.62291	5.98392	1.22e-06	8.75e-06	4.73652	FBgn0003961	CG7171	Uro	Urate oxidase	34060	4846 // urate oxidase activity // inferred from sequence or structural similarity /// 4846 // urate oxidase activity // non-traceable author statement /// 4846 // urate oxidase activity // inferred from sequence similarity	6144 // purine base metabolism // inferred from electronic annotation /// 19428 // allantoin biosynthesis // traceable author statement	5777 // peroxisome // non-traceable author statement	IPR002042 // Uricase // 4.2E-68 /// IPR002042 // Uricase // 4.0E-70
5308	146507_at	1.11666	1.20456	18.3692	2.26e-18	5.1e-16	31.9325	FBgn0032810	CG13077	CG13077	CG13077	35252	5515 // protein binding // inferred from physical interaction	6118 // electron transport // inferred from electronic annotation	16021 // integral to membrane // inferred from electronic annotation	IPR004877 // Cytochrome b561 // 1.5E-86
12659	153858_at	1.11562	3.69676	7.35352	2.57e-08	2.6e-07	8.60938	FBgn0000308	CG9553	chic	chickadee	33834	3779 // actin binding // inferred from sequence or structural similarity /// 3779 // actin binding // non-traceable author statement /// 5200 // structural constituent of cytoskeleton // inferred from electronic annotation /// 5546 // phosphatidylinositol-4,5-bisphosphate binding // non-traceable author statement /// 3779 // actin binding // inferred from electronic annotation /// 3779 // actin b…	902 // cellular morphogenesis // inferred from mutant phenotype /// 910 // cytokinesis // inferred from mutant phenotype /// 915 // cytokinesis, contractile ring formation // traceable author statement /// 7015 // actin filament organization // inferred from mutant phenotype /// 7015 // actin filament organization // traceable author statement /// 7283 // spermatogenesis // inferred from mutant p…	15629 // actin cytoskeleton // inferred from electronic annotation /// 5856 // cytoskeleton // inferred from electronic annotation	IPR002097 // Profilin/allergen // 5.8E-66
9119	150318_at	1.11489	1.0496	13.1421	2.56e-14	1.37e-12	22.5619	FBgn0038893	CG6353	CG6353	CG6353	42551	---	---	---	IPR002804 // Protein of unknown function DUF101 // 3.2E-81
9938	151137_r_at	1.11418	5.55536	6.22013	6.18e-07	4.72e-06	5.41341	FBgn0040653	CG15231	IM4	Immune induced molecule 4	50126	---	6952 // defense response // inferred from direct assay /// 6955 // immune response // traceable author statement /// 6955 // immune response // inferred from electronic annotation /// 45087 // innate immune response // inferred from electronic annotation /// 6952 // defense response // non-traceable author statement	5576 // extracellular region // inferred from direct assay /// 5576 // extracellular region // non-traceable author statement	---
5150	146349_at	1.11082	1.00816	15.1454	5.35e-16	5e-14	26.4578	FBgn0032536	---	Ance-3	Ance-3	---	4246 // peptidyl-dipeptidase A activity // inferred from electronic annotation	6508 // proteolysis // inferred from electronic annotation	16020 // membrane // inferred from electronic annotation	---
11535	152734_at	1.10973	3.02101	14.3905	2.19e-15	1.71e-13	25.0388	FBgn0028940	CG8864	Cyp28a5	Cyp28a5	34817	4497 // monooxygenase activity // inferred from electronic annotation /// 16491 // oxidoreductase activity // inferred from electronic annotation /// 5506 // iron ion binding // inferred from electronic annotation /// 20037 // heme binding // inferred from electronic annotation /// 46872 // metal ion binding // inferred from electronic annotation	6118 // electron transport // inferred from electronic annotation /// 8202 // steroid metabolism // inferred from electronic annotation	5792 // microsome // non-traceable author statement /// 16020 // membrane // non-traceable author statement /// 5783 // endoplasmic reticulum // inferred from electronic annotation /// 5792 // microsome // inferred from electronic annotation /// 16020 // membrane // inferred from electronic annotation	IPR001128 // Cytochrome P450 // 1.9E-68
13794	154993_at	1.10861	1.80898	14.0118	4.55e-15	3.23e-13	24.3051	FBgn0037447	CG2330	CG2330	CG2330	40796	5198 // structural molecule activity // inferred from electronic annotation /// 5201 // extracellular matrix structural constituent // inferred from electronic annotation	1501 // skeletal development // inferred from electronic annotation /// 7275 // development // inferred from electronic annotation /// 7398 // ectoderm development // inferred from electronic annotation /// 7399 // nervous system development // inferred from electronic annotation /// 7498 // mesoderm development // inferred from electronic annotation	---	IPR008709 // Neurochondrin // 1.0E-126
5927	147126_i_at	1.10766	3.33344	10.0523	2.41e-11	4.99e-10	15.6467	FBgn0033788 /// FBgn0033789	CG13323 /// CG13324	CG13323 /// CG13324	CG13323 /// CG13324	36433 /// 36434	---	---	---	---
34	141233_at	1.10689	2.76223	8.15939	2.91e-09	3.63e-08	10.8054	FBgn0029831	CG5966	CG5966	CG5966	31532	4806 // triacylglycerol lipase activity // inferred from sequence or structural similarity /// 3824 // catalytic activity // inferred from electronic annotation /// 4806 // triacylglycerol lipase activity // inferred from sequence similarity	6629 // lipid metabolism // inferred from electronic annotation	---	IPR000734 // Lipase // 5.1E-77
6138	147337_at	1.10275	1.34243	12.0468	2.55e-13	9.79e-12	20.2445	FBgn0046999	CG6429	CG6429	CG6429	36893	5515 // protein binding // inferred from physical interaction	6952 // defense response // inferred from electronic annotation /// 42742 // defense response to bacteria // inferred from electronic annotation	---	IPR008597 // Destabilase // 5.5E-73
6207	147406_at	1.09438	2.95007	4.37431	0.000124694	0.000541025	0.13776	FBgn0034289	CG10910	CG10910	CG10910	37052	---	---	---	---
8765	149964_at	1.09346	1.48989	7.16617	4.31e-08	4.15e-07	8.08874	FBgn0038346	CG14872	CG14872	CG14872	41893	---	---	---	---
12034	153233_at	1.09292	4.2987	8.95515	3.67e-10	5.66e-09	12.8971	FBgn0033875	CG6357	CG6357	CG6357	36532	4217 // cathepsin L activity // inferred from sequence or structural similarity /// 4217 // cathepsin L activity // inferred from sequence similarity	---	---	---
1999	143198_at	1.09108	4.46284	7.32883	2.75e-08	2.75e-07	8.54096	FBgn0001233	CG1242	Hsp83	Heat shock protein 83	38389	5524 // ATP binding // inferred from electronic annotation /// 42623 // ATPase activity, coupled // inferred from sequence or structural similarity /// 51082 // unfolded protein binding // inferred from electronic annotation /// 5515 // protein binding // inferred from physical interaction /// 166 // nucleotide binding // inferred from electronic annotation /// 42623 // ATPase activity, coupled /…	6457 // protein folding // inferred from sequence or structural similarity /// 6457 // protein folding // traceable author statement /// 6461 // protein complex assembly // inferred from electronic annotation /// 6952 // defense response // inferred from electronic annotation /// 7015 // actin filament organization // inferred from mutant phenotype /// 7098 // centrosome cycle // inferred from mu…	5737 // cytoplasm // inferred from sequence or structural similarity /// 5737 // cytoplasm // non-traceable author statement /// 5813 // centrosome // inferred from direct assay /// 5813 // centrosome // inferred from sequence or structural similarity /// 5737 // cytoplasm // inferred from sequence similarity	IPR001404 // Heat shock protein Hsp90 // 1.0E-126 /// IPR003594 // ATP-binding region, ATPase-like // 6.0E-18
7225	148424_at	1.08944	1.09446	12.1331	2.12e-13	8.36e-12	20.4324	FBgn0035929	CG13311	CG13311	CG13311	39008	5198 // structural molecule activity // non-traceable author statement	8152 // metabolism // inferred from electronic annotation	---	---
7514	148713_at	1.08744	1.4329	11.9483	3.16e-13	1.17e-11	20.0293	FBgn0036364	CG14109	CG14109	CG14109	39512	---	---	---	---
12466	153665_at	1.08229	3.36218	9.92352	3.3e-11	6.56e-10	15.3321	---	---	---	---	---	4672 // protein kinase activity // inferred from electronic annotation /// 4740 // [pyruvate dehydrogenase (lipoamide)] kinase activity // inferred from sequence or structural similarity /// 4740 // [pyruvate dehydrogenase (lipoamide)] kinase activity // non-traceable author statement /// 5524 // ATP binding // inferred from electronic annotation /// 16491 // oxidoreductase activity // inferred f…	6090 // pyruvate metabolism // inferred from sequence or structural similarity /// 6099 // tricarboxylic acid cycle // inferred from electronic annotation /// 6468 // protein amino acid phosphorylation // inferred from electronic annotation /// 19220 // regulation of phosphate metabolism // inferred from electronic annotation	5759 // mitochondrial matrix // inferred from sequence or structural similarity /// 5759 // mitochondrial matrix // non-traceable author statement /// 5739 // mitochondrion // inferred from electronic annotation	---
2916	144115_at	1.08092	2.378	8.96068	3.62e-10	5.6e-09	12.9114	FBgn0026084	CG4944	cib	ciboulot	31359	3779 // actin binding // inferred from sequence or structural similarity /// 3785 // actin monomer binding // inferred from direct assay /// 3779 // actin binding // inferred from electronic annotation /// 3779 // actin binding // inferred from sequence similarity	7010 // cytoskeleton organization and biogenesis // inferred from electronic annotation /// 7420 // brain development // inferred from mutant phenotype /// 35193 // central nervous system remodeling (sensu Insecta) // inferred from mutant phenotype	5829 // cytosol // inferred from direct assay /// 5737 // cytoplasm // inferred from electronic annotation	IPR001152 // Thymosin beta-4 // 2.5E-10 /// IPR001152 // Thymosin beta-4 // 1.2E-11
6011	147210_at	1.07953	3.01457	11.7856	4.5e-13	1.58e-11	19.6709	FBgn0033945	CG12868	CG12868	CG12868	36620	---	---	---	---
5928	147127_s_at	1.07806	4.20529	8.02074	4.21e-09	5.08e-08	10.4329	FBgn0033789 /// FBgn0033788	CG13323 /// CG13324	CG13324 /// CG13323	CG13324 /// CG13323	36433 /// 36434	---	---	---	---
6251	147450_at	1.07797	1.75223	9.13767	2.31e-10	3.76e-09	13.3655	FBgn0034364	CG5493	CG5493	CG5493	37139	17172 // cysteine dioxygenase activity // inferred from sequence or structural similarity /// 17172 // cysteine dioxygenase activity // inferred from sequence similarity	9063 // amino acid catabolism // inferred from electronic annotation	---	IPR010300 // Cysteine dioxygenase type I // 4.1E-118
13052	154251_at	1.07701	2.71975	16.0637	1.03e-16	1.25e-14	28.1097	FBgn0028388	---	capt	capulet	---	---	902 // cellular morphogenesis // inferred from mutant phenotype /// 7015 // actin filament organization // inferred from mutant phenotype /// 7456 // eye development (sensu Endopterygota) // inferred from mutant phenotype /// 8103 // oocyte microtubule cytoskeleton polarization // inferred from mutant phenotype /// 8154 // actin polymerization and/or depolymerization // inferred from mutant pheno…	16020 // membrane // inferred from electronic annotation	---
5126	146325_at	1.07331	1.93251	9.71506	5.48e-11	1.04e-09	14.8183	FBgn0032497	CG6043	CG6043	CG6043	34732	---	---	---	---
11617	152816_at	1.07161	5.40542	9.37173	1.28e-10	2.2e-09	13.9597	FBgn0029990	CG2233	CG2233	CG2233	31721	---	---	---	---
270	141469_at	1.06772	2.28647	10.1423	1.94e-11	4.16e-10	15.8651	---	---	---	---	---	---	---	---	IPR009882 // Gypsy // 1.0E-126
12079	153278_at	1.06672	2.0128	10.0816	2.25e-11	4.71e-10	15.7178	FBgn0010621	CG8439	Cct5	T-complex Chaperonin 5	36308	5524 // ATP binding // inferred from electronic annotation /// 42623 // ATPase activity, coupled // inferred from sequence or structural similarity /// 51082 // unfolded protein binding // inferred from sequence or structural similarity /// 166 // nucleotide binding // inferred from electronic annotation /// 5515 // protein binding // inferred from electronic annotation /// 51082 // unfolded prot…	6457 // protein folding // inferred from sequence or structural similarity /// 6457 // protein folding // inferred from electronic annotation /// 44267 // cellular protein metabolism // inferred from electronic annotation /// 6457 // protein folding // inferred from sequence similarity	5832 // chaperonin-containing T-complex // inferred from sequence or structural similarity /// 5832 // chaperonin-containing T-complex // inferred from sequence similarity	IPR002423 // Chaperonin Cpn60/TCP-1 // 1.0E-126 /// IPR002423 // Chaperonin Cpn60/TCP-1 // 1.0E-126
6432	147631_at	1.06068	-0.0665792	20.2359	1.35e-19	4.99e-17	34.7295	FBgn0034647	CG15678	CG15678	CG15678	37468	---	---	---	---
9144	150343_at	1.05835	3.67101	7.81123	7.39e-09	8.4e-08	9.86575	FBgn0038930	CG5778	CG5778	CG5778	42598	---	---	---	---
10790	151989_at	1.05245	4.18804	7.55575	1.48e-08	1.58e-07	9.16729	FBgn0031645	CG3036	CG3036	CG3036	33695	5436 // sodium:phosphate symporter activity // inferred from sequence or structural similarity /// 5215 // transporter activity // inferred from electronic annotation /// 5436 // sodium:phosphate symporter activity // inferred from sequence similarity	5975 // carbohydrate metabolism // inferred from electronic annotation /// 6796 // phosphate metabolism // inferred from electronic annotation /// 6812 // cation transport // inferred from electronic annotation /// 6817 // phosphate transport // inferred from sequence or structural similarity /// 6858 // extracellular transport // inferred from electronic annotation /// 8643 // carbohydrate trans…	16021 // integral to membrane // inferred from sequence or structural similarity /// 16020 // membrane // inferred from electronic annotation /// 16021 // integral to membrane // inferred from electronic annotation /// 16021 // integral to membrane // inferred from sequence similarity	---
12599	153798_at	1.05196	2.77582	9.65928	6.28e-11	1.17e-09	14.6799	FBgn0035715	CG10103	CG10103	CG10103	38750	3676 // nucleic acid binding // inferred from electronic annotation /// 4522 // pancreatic ribonuclease activity // inferred from electronic annotation /// 5515 // protein binding // inferred from physical interaction	---	---	IPR005061 // Eukaryotic protein of unknown function DUF292 // 1.7E-75
10857	152056_at	1.0502	4.60611	10.4594	9.16e-12	2.2e-10	16.6265	FBgn0003231	CG10360	ref(2)P	refractory to sigma P	35246	4197 // cysteine-type endopeptidase activity // inferred from electronic annotation /// 8270 // zinc ion binding // inferred from electronic annotation /// 30528 // transcription regulator activity // inferred from electronic annotation /// 5515 // protein binding // inferred from physical interaction /// 3677 // DNA binding // inferred from electronic annotation /// 46872 // metal ion binding //…	6508 // proteolysis // inferred from electronic annotation /// 19058 // viral infectious cycle // non-traceable author statement	5634 // nucleus // non-traceable author statement /// 5634 // nucleus // inferred from electronic annotation	IPR000433 // Zn-finger, ZZ type // 8.7E-25 /// IPR000270 // Octicosapeptide/Phox/Bem1p // 4.3E-8
1770	142969_at	1.04981	4.76367	9.96245	3e-11	6.07e-10	15.4274	FBgn0004629	CG8050	Cys	Cystatin-like	41767	4869 // cysteine protease inhibitor activity // inferred from sequence or structural similarity /// 4869 // cysteine protease inhibitor activity // non-traceable author statement /// 5515 // protein binding // inferred from physical interaction /// 4866 // endopeptidase inhibitor activity // inferred from electronic annotation /// 4869 // cysteine protease inhibitor activity // inferred from elec…	---	---	IPR000010 // Cysteine protease inhibitor // 1.4E-18
1280	142479_at	1.04711	1.84356	10.1217	2.04e-11	4.31e-10	15.8153	FBgn0063492	CG17533	GstE8	Glutathione S transferase E8	37113	5515 // protein binding // inferred from physical interaction /// 4364 // glutathione transferase activity // inferred from electronic annotation /// 16740 // transferase activity // inferred from electronic annotation	---	---	IPR004046 // Glutathione S-transferase, C-terminal // 8.9E-12 /// IPR004045 // Glutathione S-transferase, N-terminal // 6.0E-18 /// IPR004046 // Glutathione S-transferase, C-terminal // 9.0E-13
9820	151019_at	1.03367	3.95666	12.0058	2.79e-13	1.05e-11	20.1551	FBgn0040532	CG8369	CG8369	CG8369	50005	---	---	---	---
10232	151431_at	1.03349	1.04699	6.6268	1.95e-07	1.63e-06	6.57172	---	---	---	---	---	---	---	---	---
3036	144235_at	1.02768	1.24752	17.7118	6.44e-18	1.2e-15	30.8867	FBgn0028545	CG8942	CG8942	CG8942	34816	5198 // structural molecule activity // inferred from electronic annotation /// 5529 // sugar binding // inferred from electronic annotation /// 17147 // Wnt-protein binding // inferred from sequence or structural similarity /// 17147 // Wnt-protein binding // inferred from sequence similarity	16055 // Wnt receptor signaling pathway // inferred from sequence or structural similarity /// 16055 // Wnt receptor signaling pathway // inferred from sequence similarity	---	IPR003019 // Metallothionein superfamily // 0.05 /// IPR003341 // Protein of unknown function DUF139 // 2.4E-6
10011	151210_at	1.02169	5.24295	10.2952	1.35e-11	3.09e-10	16.234	FBgn0040735	CG16836	CG16836	CG16836	50208	---	---	---	---
9581	150780_at	1.01713	1.37968	13.3475	1.69e-14	9.84e-13	22.9809	FBgn0039593	CG9989	CG9989	CG9989	43390	5515 // protein binding // inferred from physical interaction /// 3676 // nucleic acid binding // inferred from electronic annotation /// 4519 // endonuclease activity // inferred from electronic annotation	---	---	IPR001604 // DNA/RNA non-specific endonuclease // 1.5E-8
11130	152329_at	1.01287	1.54967	8.51188	1.15e-09	1.57e-08	11.7418	FBgn0037646	CG11967	CG11967	CG11967	41070	4089 // carbonate dehydratase activity // inferred from electronic annotation /// 8270 // zinc ion binding // inferred from electronic annotation /// 16829 // lyase activity // inferred from electronic annotation /// 16836 // hydro-lyase activity // inferred from electronic annotation	8152 // metabolism // inferred from electronic annotation /// 15976 // carbon utilization // inferred from electronic annotation	---	IPR001765 // Carbonic anhydrase, prokaryotic and plant // 2.1E-23
7351	148550_at	1.01272	2.29923	13.9717	4.92e-15	3.47e-13	24.2264	FBgn0036126	CG6272	CG6272	CG6272	39243	3677 // DNA binding // inferred from electronic annotation /// 46982 // protein heterodimerization activity // inferred from sequence or structural similarity /// 43565 // sequence-specific DNA binding // inferred from electronic annotation /// 46983 // protein dimerization activity // inferred from electronic annotation /// 46982 // protein heterodimerization activity // inferred from sequence s…	6355 // regulation of transcription, DNA-dependent // inferred from electronic annotation	5634 // nucleus // inferred from electronic annotation	---
5510	146709_at	1.01144	3.94974	13.6879	8.58e-15	5.59e-13	23.6654	FBgn0029506	CG10106	Tsp42Ee	Tetraspanin 42Ee	35614	---	---	16021 // integral to membrane // inferred from sequence or structural similarity /// 16021 // integral to membrane // inferred from electronic annotation /// 16021 // integral to membrane // inferred from sequence similarity	IPR000301 // CD9/CD37/CD63 antigen // 4.0E-56
5015	146214_at	1.00997	1.77138	9.37723	1.26e-10	2.18e-09	13.9736	FBgn0032322	CG16743	CG16743	CG16743	34517	---	---	---	---
990	142189_at	1.00952	2.03423	13.5967	1.03e-14	6.55e-13	23.4832	FBgn0013772	CG10248	Cyp6a8	Cytochrome P450-6a8	36666	4497 // monooxygenase activity // inferred from electronic annotation /// 8393 // fatty acid (omega-1)-hydroxylase activity // inferred from direct assay /// 16491 // oxidoreductase activity // inferred from electronic annotation /// 5506 // iron ion binding // inferred from electronic annotation /// 20037 // heme binding // inferred from electronic annotation /// 46872 // metal ion binding // in…	6118 // electron transport // inferred from electronic annotation /// 8202 // steroid metabolism // inferred from electronic annotation /// 17143 // insecticide metabolism // inferred from direct assay /// 48252 // lauric acid metabolism // inferred from direct assay	5792 // microsome // non-traceable author statement /// 16020 // membrane // non-traceable author statement /// 5783 // endoplasmic reticulum // inferred from electronic annotation /// 5792 // microsome // inferred from electronic annotation /// 16020 // membrane // inferred from electronic annotation	IPR001128 // Cytochrome P450 // 2.4E-126
6234	147433_at	1.0067	4.12009	5.93125	1.41e-06	9.99e-06	4.58529	FBgn0034331	CG15067	CG15067	CG15067	37102	---	---	---	---
10887	152086_at	1.00426	4.3536	12.6013	7.84e-14	3.61e-12	21.4353	FBgn0036106	CG6409	CG6409	CG6409	39220	---	6506 // GPI anchor biosynthesis // inferred from sequence or structural similarity /// 6506 // GPI anchor biosynthesis // inferred from sequence similarity	5783 // endoplasmic reticulum // inferred from sequence or structural similarity /// 5783 // endoplasmic reticulum // inferred from sequence similarity	---
8443	149642_at	0.994356	1.80711	8.01068	4.32e-09	5.19e-08	10.4058	FBgn0051272	CG31272	CG31272	CG31272	326130	5215 // transporter activity // inferred from sequence or structural similarity /// 16298 // lipase activity // inferred from sequence or structural similarity /// 5215 // transporter activity // inferred from electronic annotation /// 5215 // transporter activity // inferred from sequence similarity /// 16298 // lipase activity // inferred from sequence similarity	6629 // lipid metabolism // inferred from sequence or structural similarity /// 6810 // transport // inferred from sequence or structural similarity /// 7269 // neurotransmitter secretion // inferred from electronic annotation /// 6810 // transport // inferred from electronic annotation /// 6629 // lipid metabolism // inferred from sequence similarity /// 6810 // transport // inferred from sequen…	16021 // integral to membrane // inferred from electronic annotation /// 30672 // synaptic vesicle membrane // inferred from sequence or structural similarity /// 16020 // membrane // inferred from electronic annotation /// 30672 // synaptic vesicle membrane // inferred from sequence similarity	IPR005828 // General substrate transporter // 8.6E-6 /// IPR005828 // General substrate transporter // 8.8E-7
11462	152661_at	0.993148	2.21017	13.1613	2.47e-14	1.33e-12	22.6012	FBgn0030749	CG9968	Anxb11	Annexin B11	32612	3779 // actin binding // inferred from sequence or structural similarity /// 5509 // calcium ion binding // inferred from electronic annotation /// 5544 // calcium-dependent phospholipid binding // non-traceable author statement /// 8237 // metallopeptidase activity // inferred from electronic annotation /// 8270 // zinc ion binding // inferred from electronic annotation /// 5515 // protein bindi…	6508 // proteolysis // inferred from electronic annotation /// 6629 // lipid metabolism // inferred from electronic annotation /// 7155 // cell adhesion // inferred from mutant phenotype /// 8360 // regulation of cell shape // inferred from mutant phenotype /// 50819 // negative regulation of coagulation // inferred from electronic annotation	---	IPR001464 // Annexin // 2.6E-34 /// IPR001464 // Annexin // 6.6E-28 /// IPR001464 // Annexin // 7.0E-27 /// IPR001464 // Annexin // 1.7E-29 /// IPR001464 // Annexin // 2.6E-34 /// IPR001464 // Annexin // 6.6E-28 /// IPR001464 // Annexin // 7.0E-27 /// IPR001464 // Annexin // 1.7E-29
4529	145728_at	0.991392	3.59435	6.72677	1.47e-07	1.26e-06	6.85475	FBgn0031558	CG16704	CG16704	CG16704	33589	4867 // serine-type endopeptidase inhibitor activity // inferred from sequence or structural similarity /// 5215 // transporter activity // inferred from electronic annotation /// 4867 // serine-type endopeptidase inhibitor activity // inferred from electronic annotation /// 4867 // serine-type endopeptidase inhibitor activity // inferred from sequence similarity	6810 // transport // inferred from electronic annotation	5576 // extracellular region // inferred from electronic annotation	IPR002223 // Pancreatic trypsin inhibitor (Kunitz) // 5.8E-14
1101	142300_at	0.989145	1.73509	11.3575	1.16e-12	3.63e-11	18.7125	FBgn0015229	CG6575	glec	gliolectin	42571	30246 // carbohydrate binding // inferred from direct assay /// 30246 // carbohydrate binding // non-traceable author statement	7155 // cell adhesion // non-traceable author statement /// 7157 // heterophilic cell adhesion // inferred from mutant phenotype /// 7399 // nervous system development // inferred from expression pattern /// 7399 // nervous system development // inferred from mutant phenotype /// 7399 // nervous system development // non-traceable author statement	5624 // membrane fraction // inferred from direct assay /// 16021 // integral to membrane // inferred from sequence or structural similarity /// 16021 // integral to membrane // inferred from sequence similarity	---
13454	154653_at	0.988585	3.38894	9.94655	3.12e-11	6.26e-10	15.3885	FBgn0010238	CG12369	Lac	Lachesin	36363	5515 // protein binding // inferred from electronic annotation	7156 // homophilic cell adhesion // inferred from direct assay /// 7165 // signal transduction // inferred from electronic annotation /// 7409 // axonogenesis // inferred from sequence or structural similarity /// 7424 // tracheal system development (sensu Insecta) // inferred from expression pattern /// 7424 // tracheal system development (sensu Insecta) // inferred from mutant phenotype /// 163…	5918 // septate junction // inferred from direct assay /// 19898 // extrinsic to membrane // non-traceable author statement /// 16020 // membrane // inferred from electronic annotation	IPR007110 // Immunoglobulin-like // 4.1E-9 /// IPR007110 // Immunoglobulin-like // 2.8E-11 /// IPR007110 // Immunoglobulin-like // 8.8E-4 /// IPR007110 // Immunoglobulin-like // 8.8E-4
8524	149723_at	0.987804	1.25927	11.747	4.9e-13	1.69e-11	19.5854	FBgn0037974	CG12224	CG12224	CG12224	41453	16491 // oxidoreductase activity // inferred from sequence or structural similarity /// 16491 // oxidoreductase activity // inferred from sequence similarity	---	---	IPR001395 // Aldo/keto reductase // 2.9E-12
10798	151997_at	0.987129	2.73004	6.49328	2.84e-07	2.3e-06	6.19259	FBgn0016126	CG1495	CaMKI	Calcium/calmodulin-dependent protein kinase I	43792	4674 // protein serine/threonine kinase activity // non-traceable author statement /// 4684 // calmodulin-dependent protein kinase I activity // inferred from sequence or structural similarity /// 4702 // receptor signaling protein serine/threonine kinase activity // inferred from electronic annotation /// 5516 // calmodulin binding // traceable author statement /// 5524 // ATP binding // inferre…	6468 // protein amino acid phosphorylation // inferred from sequence or structural similarity /// 6468 // protein amino acid phosphorylation // non-traceable author statement /// 6936 // muscle contraction // inferred from electronic annotation /// 7268 // synaptic transmission // inferred from electronic annotation /// 19722 // calcium-mediated signaling // inferred from electronic annotation //…	5829 // cytosol // inferred from sequence or structural similarity /// 5829 // cytosol // inferred from sequence similarity	IPR000719 // Protein kinase // 2.9E-99 /// IPR000719 // Protein kinase // 2.6E-73 /// IPR000719 // Protein kinase // 2.1E-44
2122	143321_at	0.98705	2.82218	13.8438	6.31e-15	4.29e-13	23.9747	FBgn0003250	CG9668	Rh4	Rhodopsin 4	39887	4930 // G-protein coupled receptor activity // non-traceable author statement /// 8020 // G-protein coupled photoreceptor activity // inferred from direct assay /// 8020 // G-protein coupled photoreceptor activity // inferred from sequence or structural similarity /// 8020 // G-protein coupled photoreceptor activity // non-traceable author statement /// 8020 // G-protein coupled photoreceptor act…	7186 // G-protein coupled receptor protein signaling pathway // inferred from sequence or structural similarity /// 7601 // visual perception // inferred from electronic annotation /// 7602 // phototransduction // non-traceable author statement /// 7604 // phototransduction, UV // inferred from direct assay /// 7604 // phototransduction, UV // non-traceable author statement /// 7604 // phototrans…	16021 // integral to membrane // inferred from sequence or structural similarity /// 16021 // integral to membrane // non-traceable author statement /// 16021 // integral to membrane // inferred from electronic annotation /// 16021 // integral to membrane // inferred from sequence similarity	IPR000276 // Rhodopsin-like GPCR superfamily // 4.5E-69
9839	151038_at	0.986663	2.08429	6.66478	1.75e-07	1.48e-06	6.67933	FBgn0040551	CG11686	CG11686	CG11686	50024	---	---	---	---
10949	152148_at	0.984435	2.1826	10.0719	2.3e-11	4.79e-10	15.6942	FBgn0053307	CG33307	CG33307	CG33307	2768914	---	---	---	---
462	141661_at	0.980584	1.20476	13.0652	3e-14	1.56e-12	22.4036	FBgn0010278	CG4817	Ssrp	Structure specific recognition protein	37767	217 // DNA secondary structure binding // inferred from sequence or structural similarity /// 3697 // single-stranded DNA binding // inferred from sequence or structural similarity /// 3697 // single-stranded DNA binding // non-traceable author statement /// 3727 // single-stranded RNA binding // non-traceable author statement /// 5515 // protein binding // inferred from physical interaction /// …	1672 // regulation of chromatin assembly or disassembly // inferred from mutant phenotype /// 6357 // regulation of transcription from RNA polymerase II promoter // inferred from electronic annotation /// 6355 // regulation of transcription, DNA-dependent // inferred from electronic annotation	5634 // nucleus // inferred from sequence or structural similarity /// 5634 // nucleus // non-traceable author statement /// 5730 // nucleolus // non-traceable author statement /// 35101 // FACT complex // traceable author statement /// 5634 // nucleus // inferred from electronic annotation /// 5634 // nucleus // inferred from sequence similarity	IPR000969 // Structure-specific recognition protein // 1.0E-126 /// IPR000910 // HMG1/2 (high mobility group) box // 3.1E-33
10111	151310_at	0.980268	0.748633	15.3235	3.87e-16	3.84e-14	26.7843	FBgn0040837	CG8620	CG8620	CG8620	50310	---	---	---	---
6120	147319_at	0.979547	3.10555	6.80826	1.17e-07	1.02e-06	7.08485	FBgn0034140	CG8317	CG8317	CG8317	36853	---	---	---	---
10449	151648_at	0.979221	2.69656	13.6788	8.74e-15	5.67e-13	23.6474	FBgn0025866	CG8107	CalpB	Calpain-B	39165	4198 // calpain activity // inferred from direct assay /// 4198 // calpain activity // non-traceable author statement /// 5509 // calcium ion binding // inferred from electronic annotation /// 5509 // calcium ion binding // non-traceable author statement /// 5516 // calmodulin binding // inferred from electronic annotation /// 5515 // protein binding // inferred from physical interaction /// 4197…	6508 // proteolysis // inferred from direct assay /// 6508 // proteolysis // inferred from electronic annotation /// 16540 // protein autoprocessing // traceable author statement	5622 // intracellular // inferred from electronic annotation /// 5737 // cytoplasm // inferred from direct assay /// 5737 // cytoplasm // non-traceable author statement /// 16020 // membrane // inferred from direct assay /// 16020 // membrane // inferred from electronic annotation	IPR001300 // Peptidase C2, calpain // 1.0E-126 /// IPR002048 // Calcium-binding EF-hand // 1.2E-5 /// IPR002048 // Calcium-binding EF-hand // 0.16 /// IPR001300 // Peptidase C2, calpain // 1.0E-99
1339	142538_at	0.970717	1.97662	10.2221	1.61e-11	3.56e-10	16.0579	FBgn0063493	CG17531	GstE7	Glutathione S transferase E7	37112	4364 // glutathione transferase activity // inferred from sequence or structural similarity /// 4364 // glutathione transferase activity // inferred from sequence similarity	6800 // oxygen and reactive oxygen species metabolism // inferred from electronic annotation /// 6952 // defense response // inferred from electronic annotation /// 9636 // response to toxin // inferred from electronic annotation	---	IPR004046 // Glutathione S-transferase, C-terminal // 3.3E-13 /// IPR004045 // Glutathione S-transferase, N-terminal // 7.1E-20
12168	153367_at	0.961562	1.21765	17.1835	1.53e-17	2.38e-15	30.0213	FBgn0037977	CG3132	Ect3	Ect3	41457	4565 // beta-galactosidase activity // inferred from sequence or structural similarity /// 4565 // beta-galactosidase activity // inferred from electronic annotation /// 4565 // beta-galactosidase activity // inferred from sequence similarity	5975 // carbohydrate metabolism // inferred from electronic annotation /// 35071 // salivary gland cell autophagic cell death // inferred from expression pattern /// 48102 // autophagic cell death // inferred from expression pattern	5764 // lysosome // inferred from sequence or structural similarity /// 9341 // beta-galactosidase complex // inferred from electronic annotation /// 5764 // lysosome // inferred from sequence similarity	IPR001944 // Glycoside hydrolase, family 35 // 1.5E-119 /// IPR001944 // Glycoside hydrolase, family 35 // 2.8E-8
2524	143723_at	0.958517	3.56594	16.8825	2.53e-17	3.65e-15	29.5181	FBgn0013771	CG10246	Cyp6a9	Cytochrome P450-6a9	36663	4497 // monooxygenase activity // inferred from electronic annotation /// 16491 // oxidoreductase activity // inferred from electronic annotation /// 5515 // protein binding // inferred from physical interaction /// 5506 // iron ion binding // inferred from electronic annotation /// 20037 // heme binding // inferred from electronic annotation /// 46872 // metal ion binding // inferred from electr…	6118 // electron transport // inferred from electronic annotation /// 8202 // steroid metabolism // inferred from electronic annotation /// 17143 // insecticide metabolism // non-traceable author statement	5792 // microsome // non-traceable author statement /// 16020 // membrane // non-traceable author statement /// 5783 // endoplasmic reticulum // inferred from electronic annotation /// 5792 // microsome // inferred from electronic annotation /// 16020 // membrane // inferred from electronic annotation	IPR001128 // Cytochrome P450 // 3.1E-113
10930	152129_at	0.951008	3.01378	14.9025	8.37e-16	7.38e-14	26.0073	FBgn0027569	CG7207	CG7207	CG7207	38928	4674 // protein serine/threonine kinase activity // inferred from sequence or structural similarity /// 4702 // receptor signaling protein serine/threonine kinase activity // inferred from electronic annotation /// 5515 // protein binding // inferred from physical interaction /// 4674 // protein serine/threonine kinase activity // inferred from sequence similarity	6468 // protein amino acid phosphorylation // inferred from electronic annotation	---	IPR001849 // Pleckstrin-like // 1.6E-21 /// IPR002913 // Lipid-binding START // 1.5E-13
10230	151429_at	0.947669	5.17025	10.974	2.77e-12	7.78e-11	17.8343	FBgn0040968	CG14933	CG14933	CG14933	50442	---	---	---	IPR002350 // Serine protease inhibitor, Kazal type // 8.8E-8
10728	151927_at	0.942991	2.54709	7.57011	1.42e-08	1.53e-07	9.20675	FBgn0036619	CG4784	CG4784	CG4784	39816	42302 // structural constituent of cuticle // inferred from electronic annotation	---	---	IPR000618 // Insect cuticle protein // 2.2E-7
13119	154318_at	0.942659	1.92783	13.6688	8.91e-15	5.75e-13	23.6273	FBgn0033304	CG2397	Cyp6a13	Cyp6a13	35837	4497 // monooxygenase activity // inferred from electronic annotation /// 16491 // oxidoreductase activity // inferred from electronic annotation /// 5515 // protein binding // inferred from physical interaction /// 5506 // iron ion binding // inferred from electronic annotation /// 20037 // heme binding // inferred from electronic annotation /// 46872 // metal ion binding // inferred from electr…	6118 // electron transport // inferred from electronic annotation /// 8202 // steroid metabolism // inferred from electronic annotation	5792 // microsome // non-traceable author statement /// 16020 // membrane // non-traceable author statement /// 5783 // endoplasmic reticulum // inferred from electronic annotation /// 5792 // microsome // inferred from electronic annotation /// 16020 // membrane // inferred from electronic annotation	IPR001128 // Cytochrome P450 // 1.5E-109
4900	146099_at	0.936861	1.37728	6.54417	2.46e-07	2.02e-06	6.33724	FBgn0032139	CG13116	CG13116	CG13116	34288	---	---	---	---
13543	154742_at	0.93576	1.56876	10.2904	1.37e-11	3.11e-10	16.2223	FBgn0011744	CG7558	Arp66B	Actin-related protein 66B	38898	3779 // actin binding // inferred from sequence or structural similarity /// 5200 // structural constituent of cytoskeleton // inferred from sequence or structural similarity /// 5515 // protein binding // inferred from physical interaction /// 166 // nucleotide binding // inferred from electronic annotation /// 5198 // structural molecule activity // inferred from electronic annotation /// 5515 …	7010 // cytoskeleton organization and biogenesis // inferred from sequence or structural similarity /// 7303 // cytoplasmic transport, nurse cell to oocyte // inferred from mutant phenotype /// 7413 // axonal fasciculation // inferred from mutant phenotype /// 8064 // regulation of actin polymerization and/or depolymerization // non-traceable author statement /// 8335 // ovarian ring canal stabil…	5884 // actin filament // inferred from sequence or structural similarity /// 5885 // Arp2/3 protein complex // inferred from sequence or structural similarity /// 5885 // Arp2/3 protein complex // non-traceable author statement /// 15629 // actin cytoskeleton // non-traceable author statement /// 5856 // cytoskeleton // inferred from electronic annotation /// 5884 // actin filament // inferred f…	IPR004000 // Actin/actin-like // 3.3E-98
10826	152025_at	0.934202	2.22982	15.578	2.44e-16	2.55e-14	27.2458	FBgn0030159	CG9689	CG9689	CG9689	31922	---	---	---	---
1679	142878_at	0.933606	2.09014	13.5926	1.04e-14	6.56e-13	23.4751	FBgn0030932	CG6461	CG6461	CG6461	32839	3840 // gamma-glutamyltransferase activity // inferred from sequence or structural similarity /// 8233 // peptidase activity // inferred from electronic annotation /// 8415 // acyltransferase activity // inferred from electronic annotation /// 5515 // protein binding // inferred from physical interaction /// 3840 // gamma-glutamyltransferase activity // inferred from electronic annotation /// 384…	6464 // protein modification // inferred from electronic annotation /// 6508 // proteolysis // inferred from electronic annotation /// 6520 // amino acid metabolism // inferred from electronic annotation /// 6629 // lipid metabolism // inferred from electronic annotation	---	IPR000101 // Peptidase T3, gamma-glutamyltranspeptidase // 1.0E-126
2946	144145_at	0.931651	1.74109	6.56898	2.29e-07	1.89e-06	6.4077	FBgn0026431	CG6176	Grip75	Grip75	34441	3677 // DNA binding // inferred from electronic annotation /// 4519 // endonuclease activity // inferred from electronic annotation /// 5200 // structural constituent of cytoskeleton // non-traceable author statement /// 8017 // microtubule binding // inferred from electronic annotation /// 15631 // tubulin binding // inferred from sequence or structural similarity /// 5200 // structural constitu…	6281 // DNA repair // inferred from electronic annotation /// 7020 // microtubule nucleation // non-traceable author statement /// 7049 // cell cycle // inferred from electronic annotation /// 226 // microtubule cytoskeleton organization and biogenesis // inferred from electronic annotation	8274 // gamma-tubulin ring complex // non-traceable author statement /// 8274 // gamma-tubulin ring complex // traceable author statement /// 8274 // gamma-tubulin ring complex // inferred from sequence or structural similarity /// 922 // spindle pole // inferred from electronic annotation /// 5815 // microtubule organizing center // inferred from electronic annotation /// 5874 // microtubule // …	IPR007259 // Spc97/Spc98 // 2.3E-14 /// IPR007259 // Spc97/Spc98 // 1.0E-23
4007	145206_at	0.931462	1.69072	9.52681	8.71e-11	1.57e-09	14.3495	FBgn0030782	CG18358	CG18358	CG18358	32656	---	---	---	---
12100	153299_at	0.927862	1.84674	12.1509	2.04e-13	8.11e-12	20.4709	FBgn0032451	CG12292	CG12292	CG12292	34681	5515 // protein binding // inferred from physical interaction	---	---	IPR008521 // Protein of unknown function DUF803 // 1.0E-126
5844	147043_at	0.926691	1.37593	8.26153	2.22e-09	2.85e-08	11.0784	FBgn0033659	CG18188	Damm	Death associated molecule related to Mch2	36266	30693 // caspase activity // inferred from direct assay /// 30693 // caspase activity // inferred from sequence or structural similarity /// 30693 // caspase activity // non-traceable author statement /// 30693 // caspase activity // traceable author statement /// 8233 // peptidase activity // inferred from electronic annotation /// 30693 // caspase activity // inferred from electronic annotation…	6508 // proteolysis // inferred from electronic annotation /// 6915 // apoptosis // inferred from genetic interaction /// 6917 // induction of apoptosis // inferred from mutant phenotype /// 7242 // intracellular signaling cascade // inferred from electronic annotation /// 12501 // programmed cell death // traceable author statement	---	IPR001309 // Caspase-1, p20 // 1.5E-60
11382	152581_at	0.925452	2.44036	13.6091	1e-14	6.45e-13	23.5081	FBgn0028984	CG18525	Spn5	Serine protease inhibitor 5	49804	4867 // serine-type endopeptidase inhibitor activity // non-traceable author statement /// 5515 // protein binding // inferred from physical interaction /// 4867 // serine-type endopeptidase inhibitor activity // inferred from electronic annotation /// 8233 // peptidase activity // inferred from electronic annotation	6508 // proteolysis // inferred from electronic annotation	---	IPR000215 // Serpin // 2.1E-81
10541	151740_at	0.921918	4.09657	12.8207	4.96e-14	2.41e-12	21.8963	FBgn0030086	CG7033	CG7033	CG7033	31838	3676 // nucleic acid binding // inferred from electronic annotation /// 5524 // ATP binding // inferred from electronic annotation /// 8026 // ATP-dependent helicase activity // inferred from electronic annotation /// 42623 // ATPase activity, coupled // inferred from electronic annotation /// 51082 // unfolded protein binding // inferred from electronic annotation /// 5515 // protein binding // …	6457 // protein folding // inferred from electronic annotation /// 6457 // protein folding // inferred from sequence or structural similarity /// 44267 // cellular protein metabolism // inferred from electronic annotation /// 6457 // protein folding // inferred from sequence similarity	5832 // chaperonin-containing T-complex // inferred from sequence or structural similarity /// 5832 // chaperonin-containing T-complex // inferred from sequence similarity	IPR002423 // Chaperonin Cpn60/TCP-1 // 1.0E-126 /// IPR002423 // Chaperonin Cpn60/TCP-1 // 1.0E-126
12586	153785_at	0.905847	2.58573	8.95933	3.63e-10	5.61e-09	12.9079	FBgn0034117	CG7997	CG7997	CG7997	36829	4557 // alpha-galactosidase activity // inferred from sequence or structural similarity /// 5515 // protein binding // inferred from physical interaction /// 4553 // hydrolase activity, hydrolyzing O-glycosyl compounds // inferred from electronic annotation /// 4557 // alpha-galactosidase activity // inferred from sequence similarity	5976 // polysaccharide metabolism // inferred from electronic annotation /// 5975 // carbohydrate metabolism // inferred from electronic annotation	---	IPR000111 // Glycoside hydrolase, clan GH-D // 1.3E-13
13182	154381_at	0.904075	1.43418	11.786	4.5e-13	1.58e-11	19.6718	FBgn0036357	CG10724	CG10724	CG10724	39505	3779 // actin binding // inferred from sequence or structural similarity /// 5200 // structural constituent of cytoskeleton // inferred from electronic annotation /// 3779 // actin binding // inferred from electronic annotation /// 3779 // actin binding // inferred from sequence similarity	6928 // cell motility // inferred from electronic annotation /// 8154 // actin polymerization and/or depolymerization // inferred from sequence or structural similarity /// 30042 // actin filament depolymerization // inferred from sequence or structural similarity /// 8154 // actin polymerization and/or depolymerization // inferred from sequence similarity /// 30042 // actin filament depolymeriza…	5856 // cytoskeleton // inferred from electronic annotation	IPR001680 // G-protein beta WD-40 repeat // 5.4E-7 /// IPR001680 // G-protein beta WD-40 repeat // 8.4E-5 /// IPR001680 // G-protein beta WD-40 repeat // 8.5E-9 /// IPR001680 // G-protein beta WD-40 repeat // 1.4E-8 /// IPR001680 // G-protein beta WD-40 repeat // 2.5E-6 /// IPR001680 // G-protein beta WD-40 repeat // 0.19 /// IPR001680 // G-protein beta WD-40 repeat // 0.0051 /// IPR001680 // G-p…
12731	153930_at	0.896506	1.15244	10.206	1.67e-11	3.67e-10	16.0191	FBgn0034354	CG5224	CG5224	CG5224	37128	4364 // glutathione transferase activity // inferred from sequence or structural similarity /// 16740 // transferase activity // inferred from electronic annotation /// 4364 // glutathione transferase activity // inferred from sequence similarity	6952 // defense response // inferred from electronic annotation /// 9636 // response to toxin // inferred from electronic annotation	---	IPR004046 // Glutathione S-transferase, C-terminal // 1.0E-12 /// IPR004045 // Glutathione S-transferase, N-terminal // 4.9E-16
12859	154058_at	0.895358	2.51867	8.54652	1.05e-09	1.45e-08	11.833	FBgn0036449	CG5295	CG5295	CG5295	39611	5515 // protein binding // inferred from physical interaction	6629 // lipid metabolism // inferred from electronic annotation	---	IPR002641 // Patatin // 4.6E-38
11034	152233_at	0.895009	3.71597	10.5367	7.63e-12	1.86e-10	16.8101	FBgn0027657	CG9734	glob1	globin 1	41930	5344 // oxygen transporter activity // inferred from sequence or structural similarity /// 5386 // carrier activity // inferred from electronic annotation /// 5515 // protein binding // inferred from physical interaction /// 5344 // oxygen transporter activity // inferred from electronic annotation /// 5488 // binding // inferred from electronic annotation /// 5506 // iron ion binding // inferred…	15671 // oxygen transport // inferred from electronic annotation /// 6810 // transport // inferred from electronic annotation	---	IPR000971 // Globin // 8.7E-26 /// IPR000971 // Globin // 9.3E-4
10236	151435_f_at	0.888473	0.927339	7.60289	1.3e-08	1.41e-07	9.29673	---	---	---	---	---	---	---	---	---
11691	152890_at	0.884119	3.78132	10.9146	3.18e-12	8.71e-11	17.6967	FBgn0038088	CG10126	CG10126	CG10126	41579	5509 // calcium ion binding // inferred from sequence or structural similarity /// 5515 // protein binding // inferred from physical interaction /// 5509 // calcium ion binding // inferred from electronic annotation /// 5509 // calcium ion binding // inferred from sequence similarity	---	---	IPR002048 // Calcium-binding EF-hand // 0.0019 /// IPR002048 // Calcium-binding EF-hand // 3.1E-5 /// IPR002048 // Calcium-binding EF-hand // 2.6E-5 /// IPR002048 // Calcium-binding EF-hand // 0.17 /// IPR002048 // Calcium-binding EF-hand // 0.0019 /// IPR002048 // Calcium-binding EF-hand // 3.1E-5 /// IPR002048 // Calcium-binding EF-hand // 2.6E-5 /// IPR002048 // Calcium-binding EF-hand // 0.17
11152	152351_at	0.882592	2.63577	7.73031	9.19e-09	1.03e-07	9.64532	FBgn0035950	CG5288	CG5288	CG5288	39031	4335 // galactokinase activity // inferred from sequence or structural similarity /// 5524 // ATP binding // inferred from electronic annotation /// 5515 // protein binding // inferred from physical interaction /// 4335 // galactokinase activity // inferred from electronic annotation /// 16301 // kinase activity // inferred from electronic annotation /// 16773 // phosphotransferase activity, alco…	5996 // monosaccharide metabolism // inferred from electronic annotation /// 6012 // galactose metabolism // inferred from electronic annotation /// 16310 // phosphorylation // inferred from electronic annotation /// 8152 // metabolism // inferred from electronic annotation /// 46835 // carbohydrate phosphorylation // inferred from electronic annotation	5737 // cytoplasm // inferred from electronic annotation	IPR006204 // GHMP kinase // 5.3E-41
13470	154669_at	0.881435	2.67351	8.69453	7.16e-10	1.02e-08	12.2209	FBgn0031313	CG5080	CG5080	CG5080	33299	---	---	---	---
6271	147470_at	0.879482	2.46057	13.2777	1.95e-14	1.11e-12	22.8391	FBgn0034399	CG15083	CG15083	CG15083	37175	---	---	---	---
58	141257_at	0.878926	2.62587	7.71178	9.66e-09	1.08e-07	9.59473	FBgn0001142	CG2718	Gs1	Glutamine synthetase 1	33172	4356 // glutamate-ammonia ligase activity // inferred from direct assay /// 4356 // glutamate-ammonia ligase activity // inferred from sequence or structural similarity /// 4356 // glutamate-ammonia ligase activity // non-traceable author statement /// 15930 // glutamate synthase activity // non-traceable author statement /// 4356 // glutamate-ammonia ligase activity // inferred from electronic a…	6541 // glutamine metabolism // non-traceable author statement /// 8652 // amino acid biosynthesis // inferred from electronic annotation /// 9399 // nitrogen fixation // inferred from electronic annotation /// 6542 // glutamine biosynthesis // inferred from electronic annotation /// 6807 // nitrogen compound metabolism // inferred from electronic annotation	5739 // mitochondrion // inferred from direct assay /// 5739 // mitochondrion // non-traceable author statement /// 5739 // mitochondrion // inferred from electronic annotation	IPR008147 // Glutamine synthetase, beta-Grasp domain // 4.4E-32 /// IPR008146 // Glutamine synthetase, catalytic domain // 4.9E-109
5450	146649_at	0.878473	1.87099	10.134	1.98e-11	4.23e-10	15.845	FBgn0033032	CG1298	CG1298	CG1298	35504	---	---	---	---
4485	145684_at	0.876261	2.11137	8.81983	5.19e-10	7.69e-09	12.5471	FBgn0031489	CG17224	CG17224	CG17224	33510	4850 // uridine phosphorylase activity // inferred from sequence or structural similarity /// 3824 // catalytic activity // inferred from electronic annotation /// 4850 // uridine phosphorylase activity // inferred from electronic annotation /// 4850 // uridine phosphorylase activity // inferred from sequence similarity	6206 // pyrimidine base metabolism // inferred from electronic annotation /// 9116 // nucleoside metabolism // inferred from electronic annotation /// 9166 // nucleotide catabolism // inferred from electronic annotation	5737 // cytoplasm // inferred from electronic annotation	---
10443	151642_at	0.875746	2.49481	9.48391	9.69e-11	1.73e-09	14.242	FBgn0037813	CG17100	CG17100	CG17100	44669	3677 // DNA binding // inferred from electronic annotation /// 3702 // RNA polymerase II transcription factor activity // non-traceable author statement /// 30528 // transcription regulator activity // inferred from electronic annotation	6355 // regulation of transcription, DNA-dependent // inferred from electronic annotation /// 45449 // regulation of transcription // inferred from sequence or structural similarity /// 7275 // development // inferred from electronic annotation /// 30154 // cell differentiation // inferred from electronic annotation /// 45449 // regulation of transcription // inferred from electronic annotation /…	5634 // nucleus // non-traceable author statement /// 5634 // nucleus // inferred from electronic annotation	IPR001092 // Basic helix-loop-helix dimerization domain bHLH // 1.1E-14
8707	149906_i_at	0.874308	1.19581	7.60674	1.29e-08	1.39e-07	9.30728	FBgn0038243	CG8066	CG8066	CG8066	41766	4869 // cysteine protease inhibitor activity // inferred from sequence or structural similarity /// 5515 // protein binding // inferred from physical interaction /// 4869 // cysteine protease inhibitor activity // inferred from electronic annotation /// 4869 // cysteine protease inhibitor activity // inferred from sequence similarity	---	---	IPR000010 // Cysteine protease inhibitor // 9.8E-12
7266	148465_at	0.872469	1.59946	9.70089	5.67e-11	1.07e-09	14.7832	FBgn0035996	CG3448	CG3448	CG3448	39094	5515 // protein binding // inferred from physical interaction	---	---	---
13244	154443_at	0.870825	1.17042	10.7602	4.53e-12	1.18e-10	17.3366	FBgn0033453	CG1667	CG1667	CG1667	36016	---	---	---	---
3633	144832_at	0.870021	0.0380932	9.11717	2.43e-10	3.93e-09	13.3131	FBgn0030244	CG2157	CG2157	CG2157	32018	5515 // protein binding // inferred from physical interaction	---	---	---
3024	144223_at	0.867352	1.56517	11.1297	1.94e-12	5.77e-11	18.1932	FBgn0028515	CG4930	CG4930	CG4930	34953	---	---	---	---
12755	153954_at	0.867195	2.72082	12.5703	8.36e-14	3.79e-12	21.3697	FBgn0027865	CG6120	Tsp96F	Tetraspanin 96F	43127	5102 // receptor binding // inferred from electronic annotation	7165 // signal transduction // inferred from electronic annotation /// 16337 // cell-cell adhesion // inferred from electronic annotation /// 19724 // B cell mediated immunity // inferred from electronic annotation	16021 // integral to membrane // inferred from sequence or structural similarity /// 16021 // integral to membrane // inferred from electronic annotation /// 16021 // integral to membrane // inferred from sequence similarity	IPR000301 // CD9/CD37/CD63 antigen // 2.5E-79
10917	152116_at	0.864187	3.164	11.7571	4.79e-13	1.66e-11	19.6078	FBgn0020414	CG4559	Idgf3	Imaginal disc growth factor 3	34981	4568 // chitinase activity // inferred from sequence or structural similarity /// 8084 // imaginal disc growth factor activity // inferred from direct assay /// 16799 // hydrolase activity, hydrolyzing N-glycosyl compounds // inferred from electronic annotation /// 4553 // hydrolase activity, hydrolyzing O-glycosyl compounds // inferred from electronic annotation /// 4568 // chitinase activity //…	7165 // signal transduction // inferred from electronic annotation /// 7267 // cell-cell signaling // inferred from electronic annotation /// 7444 // imaginal disc development // inferred from direct assay /// 8152 // metabolism // inferred from electronic annotation /// 5975 // carbohydrate metabolism // inferred from electronic annotation /// 6032 // chitin catabolism // inferred from electroni…	5576 // extracellular region // inferred from direct assay /// 5576 // extracellular region // non-traceable author statement	IPR001223 // Glycoside hydrolase, family 18 // 1.5E-97
6904	148103_at	0.863605	3.59024	4.09979	0.000270948	0.0010636	-0.622833	FBgn0035434	CG10812	dro5	drosomycin-5	38409	8200 // ion channel inhibitor activity // inferred from electronic annotation	6952 // defense response // non-traceable author statement /// 9405 // pathogenesis // inferred from electronic annotation /// 6952 // defense response // inferred from electronic annotation	5576 // extracellular region // inferred from electronic annotation	IPR008176 // Gamma thionin // 5.4E-18
2583	143782_at	0.862689	2.96873	10.9851	2.7e-12	7.69e-11	17.8602	FBgn0015037	CG10842	Cyp4p1	Cytochrome P450-4p1	45524	4497 // monooxygenase activity // inferred from electronic annotation /// 16491 // oxidoreductase activity // inferred from electronic annotation /// 5515 // protein binding // inferred from physical interaction /// 5506 // iron ion binding // inferred from electronic annotation /// 20037 // heme binding // inferred from electronic annotation /// 46872 // metal ion binding // inferred from electr…	6118 // electron transport // inferred from electronic annotation /// 8202 // steroid metabolism // inferred from electronic annotation	5792 // microsome // non-traceable author statement /// 16020 // membrane // non-traceable author statement /// 5783 // endoplasmic reticulum // inferred from electronic annotation /// 5792 // microsome // inferred from electronic annotation /// 16020 // membrane // inferred from electronic annotation	IPR001128 // Cytochrome P450 // 7.7E-79
2022	143221_at	0.861026	2.06676	10.7176	5e-12	1.29e-10	17.2369	FBgn0001987	CG3903	Gli	Gliotactin	34927	4759 // serine esterase activity // inferred from sequence or structural similarity /// 5102 // receptor binding // inferred from electronic annotation /// 3824 // catalytic activity // inferred from electronic annotation /// 4759 // serine esterase activity // inferred from sequence similarity	6952 // defense response // inferred from electronic annotation /// 7274 // neuromuscular synaptic transmission // inferred from electronic annotation /// 7398 // ectoderm development // inferred from electronic annotation /// 8065 // establishment of blood-nerve barrier // inferred from mutant phenotype /// 9636 // response to toxin // inferred from electronic annotation /// 16321 // female meio…	5886 // plasma membrane // inferred from direct assay /// 5886 // plasma membrane // non-traceable author statement /// 5918 // septate junction // inferred from direct assay	IPR002018 // Carboxylesterase, type B // 1.0E-126 /// IPR002018 // Carboxylesterase, type B // 1.0E-126
4776	145975_at	0.85899	2.52485	12.431	1.12e-13	4.86e-12	21.0735	FBgn0031937	CG13795	CG13795	CG13795	34049	5215 // transporter activity // inferred from electronic annotation /// 5328 // neurotransmitter:sodium symporter activity // inferred from electronic annotation /// 15171 // amino acid transporter activity // inferred from electronic annotation /// 15293 // symporter activity // inferred from electronic annotation	6520 // amino acid metabolism // inferred from electronic annotation /// 6810 // transport // inferred from electronic annotation /// 6811 // ion transport // inferred from electronic annotation /// 6836 // neurotransmitter transport // inferred from electronic annotation /// 6858 // extracellular transport // inferred from electronic annotation /// 6865 // amino acid transport // inferred from e…	5887 // integral to plasma membrane // inferred from electronic annotation /// 16020 // membrane // inferred from electronic annotation /// 16021 // integral to membrane // inferred from electronic annotation	---
2280	143479_at	0.857617	1.8506	10.2927	1.36e-11	3.1e-10	16.2279	FBgn0004552	CG1171	Akh	Adipokinetic hormone-like	38495	5179 // hormone activity // non-traceable author statement /// 5184 // neuropeptide hormone activity // inferred from direct assay /// 5184 // neuropeptide hormone activity // inferred from sequence or structural similarity /// 5184 // neuropeptide hormone activity // non-traceable author statement /// 5184 // neuropeptide hormone activity // traceable author statement /// 5184 // neuropeptide ho…	7218 // neuropeptide signaling pathway // traceable author statement	---	---
12119	153318_at	0.855514	3.23001	8.06475	3.74e-09	4.58e-08	10.5514	FBgn0027348	CG4501	bgm	bubblegum	44117	4467 // long-chain-fatty-acid-CoA ligase activity // inferred from sequence or structural similarity /// 3824 // catalytic activity // inferred from electronic annotation /// 4467 // long-chain-fatty-acid-CoA ligase activity // inferred from sequence similarity	6631 // fatty acid metabolism // inferred from electronic annotation /// 8152 // metabolism // inferred from electronic annotation	---	IPR000873 // AMP-dependent synthetase and ligase // 1.5E-79
5262	146461_at	0.854325	2.15228	7.47555	1.84e-08	1.92e-07	8.94656	FBgn0032726	CG10621	CG10621	CG10621	35152	8898 // homocysteine S-methyltransferase activity // inferred from electronic annotation /// 16205 // selenocysteine methyltransferase activity // inferred from sequence or structural similarity /// 16205 // selenocysteine methyltransferase activity // inferred from sequence similarity	8652 // amino acid biosynthesis // inferred from electronic annotation	---	IPR003726 // Homocysteine S-methyltransferase // 3.7E-61
1007	142206_s_at	0.852408	1.64324	7.21882	3.73e-08	3.64e-07	8.23539	FBgn0027578 /// FBgn0039613	CG14527 /// CG14526	CG14526 /// CG14527	CG14526 /// CG14527	43412 /// 43413	4222 // metalloendopeptidase activity // inferred from sequence or structural similarity /// 4245 // neprilysin activity // inferred from electronic annotation /// 8270 // zinc ion binding // inferred from electronic annotation /// 16511 // endothelin-converting enzyme activity // inferred from sequence or structural similarity /// 8233 // peptidase activity // inferred from electronic annotation…	6508 // proteolysis // inferred from electronic annotation /// 7165 // signal transduction // inferred from electronic annotation	16020 // membrane // inferred from electronic annotation	IPR008753 // Peptidase M13 // 8.0E-12 /// IPR008753 // Peptidase M13 // 7.5E-5 /// IPR000718 // Peptidase M13, neprilysin // 1.3E-45 /// IPR008753 // Peptidase M13 // 9.3E-10 /// IPR000718 // Peptidase M13, neprilysin // 2.0E-46
11253	152452_at	0.850482	3.04893	6.69084	1.63e-07	1.39e-06	6.7531	FBgn0020415	CG4475	Idgf2	Imaginal disc growth factor 2	34979	4568 // chitinase activity // inferred from sequence or structural similarity /// 8084 // imaginal disc growth factor activity // inferred from direct assay /// 16799 // hydrolase activity, hydrolyzing N-glycosyl compounds // inferred from electronic annotation /// 45735 // nutrient reservoir activity // inferred from electronic annotation /// 5515 // protein binding // inferred from physical int…	7165 // signal transduction // inferred from electronic annotation /// 7267 // cell-cell signaling // inferred from electronic annotation /// 7444 // imaginal disc development // inferred from direct assay /// 8152 // metabolism // inferred from electronic annotation /// 5975 // carbohydrate metabolism // inferred from electronic annotation /// 6032 // chitin catabolism // inferred from electroni…	5576 // extracellular region // inferred from direct assay /// 5576 // extracellular region // non-traceable author statement	IPR001223 // Glycoside hydrolase, family 18 // 7.8E-100
9333	150532_at	0.847208	1.38867	10.1916	1.73e-11	3.77e-10	15.9844	FBgn0039238	CG7016	CG7016	CG7016	42968	---	---	---	---
590	141789_at	0.847168	1.59369	8.84317	4.88e-10	7.29e-09	12.6077	FBgn0010812	CG2708	Tom34	Translocase of outer membrane 34	44910	3910 // DNA ligase (ATP) activity // inferred from electronic annotation /// 5386 // carrier activity // inferred from electronic annotation /// 5524 // ATP binding // inferred from electronic annotation /// 5488 // binding // inferred from electronic annotation	6260 // DNA replication // inferred from electronic annotation /// 6281 // DNA repair // inferred from electronic annotation /// 6310 // DNA recombination // inferred from electronic annotation	5742 // mitochondrial outer membrane translocase complex // inferred from sequence or structural similarity /// 5742 // mitochondrial outer membrane translocase complex // inferred from sequence similarity	IPR001440 // TPR repeat // 1.3E-4 /// IPR001440 // TPR repeat // 2.9E-9 /// IPR001440 // TPR repeat // 1.4E-4
10773	151972_at	0.846205	3.10148	9.64737	6.47e-11	1.2e-09	14.6503	FBgn0030679	CG8206	CG8206	CG8206	32516	5515 // protein binding // inferred from physical interaction	---	---	IPR007853 // DNL zinc finger // 9.8E-41
11803	153002_at	0.846177	3.78153	9.75463	4.97e-11	9.52e-10	14.9163	FBgn0025879	CG6281	Timp	Tissue inhibitor of metalloproteases	41248	8191 // metalloendopeptidase inhibitor activity // inferred from direct assay /// 8191 // metalloendopeptidase inhibitor activity // inferred from sequence or structural similarity /// 8191 // metalloendopeptidase inhibitor activity // non-traceable author statement /// 4857 // enzyme inhibitor activity // inferred from electronic annotation /// 8191 // metalloendopeptidase inhibitor activity // …	6508 // proteolysis // inferred from electronic annotation	5576 // extracellular region // inferred from sequence or structural similarity /// 5578 // extracellular matrix (sensu Metazoa) // inferred from electronic annotation /// 5576 // extracellular region // inferred from sequence similarity	IPR001820 // Tissue inhibitor of metalloproteinase // 1.4E-9
12437	153636_at	0.845567	2.06828	12.873	4.45e-14	2.2e-12	22.0055	FBgn0027049	CG7769	DDB1	DDB1	41611	3684 // damaged DNA binding // inferred from sequence or structural similarity /// 4365 // glyceraldehyde-3-phosphate dehydrogenase (phosphorylating) activity // inferred from electronic annotation /// 3676 // nucleic acid binding // inferred from electronic annotation /// 3684 // damaged DNA binding // inferred from sequence similarity	6096 // glycolysis // inferred from electronic annotation /// 6139 // nucleobase, nucleoside, nucleotide and nucleic acid metabolism // inferred from electronic annotation /// 6289 // nucleotide-excision repair // inferred from sequence or structural similarity /// 6289 // nucleotide-excision repair // non-traceable author statement /// 6289 // nucleotide-excision repair // inferred from sequence…	5634 // nucleus // inferred from electronic annotation	IPR004871 // CPSF A subunit, C-terminal // 1.0E-126
10220	151419_at	0.843761	0.415879	5.3824	6.87e-06	4.11e-05	3.00677	FBgn0040955	CG13790	CG13790	CG13790	50429	---	---	---	---
8656	149855_at	0.842952	1.74254	12.517	9.35e-14	4.16e-12	21.2566	FBgn0038172	CG9621	Adgf-D	Adenosine deaminase-related growth factor D	41679	4000 // adenosine deaminase activity // inferred from direct assay /// 8083 // growth factor activity // inferred from direct assay /// 19239 // deaminase activity // inferred from electronic annotation	8283 // cell proliferation // inferred from direct assay /// 9168 // purine ribonucleoside monophosphate biosynthesis // inferred from electronic annotation	5615 // extracellular space // non-traceable author statement	IPR001365 // Adenosine/AMP deaminase // 1.3E-47
12101	153300_at	0.836045	1.58014	11.4844	8.75e-13	2.84e-11	18.999	FBgn0030048	CG12112	CG12112	CG12112	31794	---	---	---	---
4671	145870_at	0.835087	0.392876	17.4431	9.97e-18	1.72e-15	30.4494	FBgn0031775	CG9150	CG9150	CG9150	33856	16614 // oxidoreductase activity, acting on CH-OH group of donors // inferred from sequence or structural similarity /// 16614 // oxidoreductase activity, acting on CH-OH group of donors // inferred from sequence similarity	8152 // metabolism // inferred from electronic annotation	---	IPR002198 // Short-chain dehydrogenase/reductase SDR // 2.3E-43
1347	142546_at	0.834811	2.56679	9.2363	1.8e-10	2.99e-09	13.6168	FBgn0037560	CG18228	CG18228	CG18228	40971	3676 // nucleic acid binding // inferred from electronic annotation	---	5634 // nucleus // inferred from electronic annotation	---
502	141701_at	0.833673	1.69764	7.48695	1.78e-08	1.87e-07	8.97799	FBgn0033205	CG2064	CG2064	CG2064	35708	16491 // oxidoreductase activity // inferred from electronic annotation	8152 // metabolism // inferred from electronic annotation	---	IPR002198 // Short-chain dehydrogenase/reductase SDR // 1.2E-36
5558	146757_at	0.829072	1.4887	4.9313	2.53e-05	0.000132251	1.71319	FBgn0033204	CG2065	CG2065	CG2065	35707	16491 // oxidoreductase activity // inferred from electronic annotation	8152 // metabolism // inferred from electronic annotation	---	IPR002198 // Short-chain dehydrogenase/reductase SDR // 2.1E-35
8560	149759_at	0.827348	0.678301	9.88923	3.58e-11	7.06e-10	15.2479	FBgn0010041	CG12242	GstD5	Glutathione S transferase D5	48338	4364 // glutathione transferase activity // inferred from sequence or structural similarity /// 4364 // glutathione transferase activity // non-traceable author statement /// 4364 // glutathione transferase activity // inferred from sequence similarity	---	---	IPR004046 // Glutathione S-transferase, C-terminal // 1.9E-10 /// IPR004045 // Glutathione S-transferase, N-terminal // 9.0E-17
2002	143201_at	0.827145	0.78775	10.5763	6.96e-12	1.73e-10	16.904	FBgn0001258	CG10160	ImpL3	Ecdysone-inducible gene L3	45880	4459 // L-lactate dehydrogenase activity // inferred from sequence or structural similarity /// 4459 // L-lactate dehydrogenase activity // non-traceable author statement /// 4459 // L-lactate dehydrogenase activity // traceable author statement /// 5515 // protein binding // inferred from physical interaction /// 4459 // L-lactate dehydrogenase activity // inferred from electronic annotation ///…	6096 // glycolysis // non-traceable author statement /// 6100 // tricarboxylic acid cycle intermediate metabolism // inferred from electronic annotation /// 6096 // glycolysis // inferred from electronic annotation /// 19642 // anaerobic glycolysis // inferred from electronic annotation	5737 // cytoplasm // inferred from electronic annotation	IPR001236 // Lactate/malate dehydrogenase // 4.6E-61 /// IPR001236 // Lactate/malate dehydrogenase // 6.5E-71
11914	153113_at	0.827081	2.70743	10.1545	1.89e-11	4.06e-10	15.8946	FBgn0036318	CG11009	CG11009	CG11009	39460	---	---	---	IPR004182 // GRAM domain // 3.1E-15
6298	147497_at	0.82682	3.37849	8.04723	3.92e-09	4.77e-08	10.5043	FBgn0034443	CG10460	cer	crammer	37229	4869 // cysteine protease inhibitor activity // inferred from direct assay	7616 // long-term memory // inferred from mutant phenotype	---	---
11560	152759_at	0.825882	3.28218	11.9157	3.39e-13	1.24e-11	19.9578	FBgn0032774	CG17549	CG17549	CG17549	35212	---	---	---	---
1475	142674_at	0.824952	1.89948	9.93106	3.24e-11	6.45e-10	15.3505	FBgn0032005	CG8282	Snx6	Snx6	34126	5515 // protein binding // inferred from physical interaction /// 5515 // protein binding // inferred from electronic annotation /// 35091 // phosphoinositide binding // inferred from electronic annotation	6886 // intracellular protein transport // inferred from sequence or structural similarity /// 7242 // intracellular signaling cascade // inferred from electronic annotation /// 6886 // intracellular protein transport // inferred from sequence similarity	---	IPR001683 // Phox-like // 8.5E-22
12729	153928_at	0.82293	2.59165	6.75501	1.36e-07	1.17e-06	6.93454	FBgn0032955	CG2201	CG2201	CG2201	35417	4103 // choline kinase activity // inferred from sequence or structural similarity /// 4103 // choline kinase activity // non-traceable author statement /// 4305 // ethanolamine kinase activity // non-traceable author statement /// 5515 // protein binding // inferred from physical interaction /// 16301 // kinase activity // inferred from electronic annotation /// 16740 // transferase activity // …	6644 // phospholipid metabolism // inferred from electronic annotation /// 16310 // phosphorylation // non-traceable author statement	---	IPR002573 // Choline/ethanolamine kinase // 6.9E-93 /// IPR002573 // Choline/ethanolamine kinase // 6.9E-93 /// IPR002573 // Choline/ethanolamine kinase // 6.9E-93
9877	151076_at	0.822633	1.15358	10.2643	1.45e-11	3.27e-10	16.1595	FBgn0040588	CG13841	CG13841	CG13841	50061	---	---	---	---
1439	142638_at	0.822454	1.74255	13.0038	3.4e-14	1.73e-12	22.2769	FBgn0014029	CG4173	2017-09-02	Septin-2	42438	3924 // GTPase activity // inferred from electronic annotation /// 3924 // GTPase activity // non-traceable author statement /// 5200 // structural constituent of cytoskeleton // inferred from electronic annotation /// 5515 // protein binding // inferred from physical interaction /// 5525 // GTP binding // inferred from sequence or structural similarity /// 166 // nucleotide binding // inferred f…	910 // cytokinesis // inferred from mutant phenotype /// 910 // cytokinesis // inferred from sequence or structural similarity /// 910 // cytokinesis // non-traceable author statement /// 7067 // mitosis // inferred from electronic annotation /// 7349 // cellularization // traceable author statement /// 7049 // cell cycle // inferred from electronic annotation /// 51301 // cell division // inferr…	5940 // septin ring // inferred from sequence or structural similarity /// 45172 // ring canal (sensu Insecta) // non-traceable author statement /// 5940 // septin ring // inferred from sequence similarity	IPR000038 // Cell division/GTP binding protein // 1.3E-120
5929	147128_r_at	0.81964	-0.18945	5.26719	9.59e-06	5.55e-05	2.6756	FBgn0033789	CG13324	CG13324	CG13324	36434	---	---	---	---
8708	149907_r_at	0.816499	1.5775	8.15296	2.96e-09	3.69e-08	10.7882	FBgn0038243	CG8066	CG8066	CG8066	41766	4869 // cysteine protease inhibitor activity // inferred from sequence or structural similarity /// 5515 // protein binding // inferred from physical interaction /// 4869 // cysteine protease inhibitor activity // inferred from electronic annotation /// 4869 // cysteine protease inhibitor activity // inferred from sequence similarity	---	---	IPR000010 // Cysteine protease inhibitor // 9.8E-12
11206	152405_at	0.815765	2.30744	7.07483	5.55e-08	5.21e-07	7.83366	FBgn0027542	CG6014	CG6014	CG6014	40368	5529 // sugar binding // inferred from electronic annotation	---	---	IPR001304 // C-type lectin // 5.8E-5
5513	146712_at	0.812639	2.00313	8.39075	1.58e-09	2.1e-08	11.4218	FBgn0033130	CG12843	Tsp42Ei	Tetraspanin 42Ei	35618	---	---	16021 // integral to membrane // inferred from sequence or structural similarity /// 16021 // integral to membrane // inferred from electronic annotation /// 16021 // integral to membrane // inferred from sequence similarity	IPR000301 // CD9/CD37/CD63 antigen // 3.6E-48
6909	148108_at	0.812359	1.91126	14.2445	2.9e-15	2.17e-13	24.7577	FBgn0035444	CG12012	CG12012	CG12012	38422	---	---	---	---
2681	143880_at	0.811544	5.46135	8.99467	3.32e-10	5.16e-09	12.9989	FBgn0016726	CG10071	RpL29	Ribosomal protein L29	37430	3735 // structural constituent of ribosome // inferred from sequence or structural similarity /// 3735 // structural constituent of ribosome // non-traceable author statement /// 5515 // protein binding // inferred from physical interaction /// 3735 // structural constituent of ribosome // inferred from electronic annotation /// 3735 // structural constituent of ribosome // inferred from sequence…	6412 // protein biosynthesis // inferred from sequence or structural similarity /// 6412 // protein biosynthesis // non-traceable author statement /// 6412 // protein biosynthesis // inferred from electronic annotation /// 6412 // protein biosynthesis // inferred from sequence similarity	5840 // ribosome // non-traceable author statement /// 5842 // cytosolic large ribosomal subunit (sensu Eukaryota) // inferred from sequence or structural similarity /// 5842 // cytosolic large ribosomal subunit (sensu Eukaryota) // non-traceable author statement /// 5622 // intracellular // inferred from electronic annotation /// 5840 // ribosome // inferred from electronic annotation /// 30529 …	IPR002673 // Ribosomal L29e protein // 4.3E-25
4448	145647_at	0.810861	1.5542	10.876	3.47e-12	9.39e-11	17.6069	FBgn0031432	CG9964	Cyp309a1	Cyp309a1	33438	3677 // DNA binding // inferred from electronic annotation /// 4497 // monooxygenase activity // inferred from electronic annotation /// 16491 // oxidoreductase activity // inferred from electronic annotation /// 5506 // iron ion binding // inferred from electronic annotation /// 20037 // heme binding // inferred from electronic annotation /// 46872 // metal ion binding // inferred from electroni…	6118 // electron transport // inferred from electronic annotation /// 6306 // DNA methylation // inferred from electronic annotation /// 8202 // steroid metabolism // inferred from electronic annotation	5792 // microsome // non-traceable author statement /// 16020 // membrane // non-traceable author statement /// 5783 // endoplasmic reticulum // inferred from electronic annotation /// 5792 // microsome // inferred from electronic annotation /// 16020 // membrane // inferred from electronic annotation	IPR001128 // Cytochrome P450 // 1.8E-6 /// IPR001128 // Cytochrome P450 // 2.2E-44
13808	155007_at	0.809744	2.57262	10.9324	3.05e-12	8.49e-11	17.7381	FBgn0052428	CG32428	CG32428	CG32428	50105	---	---	---	---
9380	150579_at	0.808856	2.25107	7.35024	2.59e-08	2.62e-07	8.60029	FBgn0039316	CG11893	CG11893	CG11893	43056	5515 // protein binding // inferred from physical interaction /// 16301 // kinase activity // inferred from electronic annotation /// 16740 // transferase activity // inferred from electronic annotation	---	---	IPR004119 // Protein of unknown function DUF227 // 1.8E-76
11157	152356_at	0.808754	1.54788	13.9587	5.04e-15	3.52e-13	24.2009	FBgn0052412	CG32412	CG32412	CG32412	38663	8233 // peptidase activity // inferred from electronic annotation /// 16603 // glutaminyl-peptide cyclotransferase activity // inferred from sequence or structural similarity /// 16603 // glutaminyl-peptide cyclotransferase activity // inferred from sequence similarity	6508 // proteolysis // inferred from electronic annotation /// 8652 // amino acid biosynthesis // inferred from electronic annotation	---	IPR005191 // Peptidase M28, glutaminyl cyclase // 1.0E-126
12137	153336_at	0.804407	2.8488	8.21615	2.5e-09	3.17e-08	10.9573	FBgn0002069	CG3821	Aats-asp	Aspartyl-tRNA synthetase	36420	3729 // mRNA binding // inferred from electronic annotation /// 4815 // aspartate-tRNA ligase activity // inferred from sequence or structural similarity /// 5524 // ATP binding // inferred from electronic annotation /// 5515 // protein binding // inferred from physical interaction /// 3676 // nucleic acid binding // inferred from electronic annotation /// 4812 // aminoacyl-tRNA ligase activity /…	6422 // aspartyl-tRNA aminoacylation // inferred from sequence or structural similarity /// 40007 // growth // inferred from mutant phenotype /// 6418 // tRNA aminoacylation for protein translation // inferred from electronic annotation /// 6422 // aspartyl-tRNA aminoacylation // inferred from electronic annotation /// 6422 // aspartyl-tRNA aminoacylation // inferred from sequence similarity	5737 // cytoplasm // inferred from electronic annotation	IPR004365 // OB-fold nucleic acid binding domain // 3.7E-14 /// IPR004364 // tRNA synthetase, class II (D, K and N) // 1.0E-126
1900	143099_i_at	0.795207	-0.0772129	5.50916	4.77e-06	2.99e-05	3.37139	FBgn0000279	CG1373	CecC	Cecropin C	43599	---	6961 // antibacterial humoral response (sensu Protostomia) // inferred from direct assay /// 6961 // antibacterial humoral response (sensu Protostomia) // non-traceable author statement /// 42742 // defense response to bacteria // non-traceable author statement /// 42742 // defense response to bacteria // traceable author statement /// 50829 // defense response to Gram-negative bacteria // inferr…	5576 // extracellular region // inferred from direct assay /// 5576 // extracellular region // inferred from electronic annotation	IPR000875 // Cecropin // 9.9E-20
6222	147421_at	0.794861	0.27712	4.21216	0.000197438	0.000808331	-0.313133	---	---	---	---	---	---	---	---	---
312	141511_at	0.794579	2.88622	8.08579	3.54e-09	4.33e-08	10.608	FBgn0016794	CG1044	dos	daughter of sevenless	38321	5070 // SH3/SH2 adaptor activity // inferred from sequence or structural similarity /// 42169 // SH2 domain binding // inferred from physical interaction /// 5070 // SH3/SH2 adaptor activity // inferred from sequence similarity	8293 // torso signaling pathway // non-traceable author statement /// 8595 // determination of anterior/posterior axis, embryo // traceable author statement /// 45500 // sevenless signaling pathway // traceable author statement	5886 // plasma membrane // inferred from sequence or structural similarity /// 5886 // plasma membrane // inferred from sequence similarity	IPR001849 // Pleckstrin-like // 3.9E-29 /// IPR001849 // Pleckstrin-like // 1.4E-10
11834	153033_at	0.791249	1.58889	7.94947	5.09e-09	5.99e-08	10.2406	FBgn0038610	CG7675	CG7675	CG7675	42211	16614 // oxidoreductase activity, acting on CH-OH group of donors // inferred from sequence or structural similarity /// 16491 // oxidoreductase activity // inferred from electronic annotation /// 16614 // oxidoreductase activity, acting on CH-OH group of donors // inferred from sequence similarity	8152 // metabolism // inferred from electronic annotation	---	IPR002198 // Short-chain dehydrogenase/reductase SDR // 2.9E-31 /// IPR002198 // Short-chain dehydrogenase/reductase SDR // 2.9E-31
399	141598_at	0.791121	2.61662	6.98536	7.12e-08	6.52e-07	7.58303	FBgn0032731	CG10641	CG10641	CG10641	35158	5509 // calcium ion binding // inferred from sequence or structural similarity /// 5509 // calcium ion binding // non-traceable author statement /// 5509 // calcium ion binding // inferred from electronic annotation /// 5509 // calcium ion binding // inferred from sequence similarity	7498 // mesoderm development // inferred from expression pattern	---	IPR002048 // Calcium-binding EF-hand // 2.5E-5 /// IPR002048 // Calcium-binding EF-hand // 8.0E-8
4775	145974_at	0.786475	1.5824	7.42871	2.09e-08	2.15e-07	8.81733	FBgn0031936	CG13794	CG13794	CG13794	34048	5328 // neurotransmitter:sodium symporter activity // inferred from electronic annotation /// 15293 // symporter activity // inferred from electronic annotation	6810 // transport // inferred from electronic annotation /// 6836 // neurotransmitter transport // inferred from electronic annotation	5887 // integral to plasma membrane // inferred from electronic annotation /// 16020 // membrane // inferred from electronic annotation /// 16021 // integral to membrane // inferred from electronic annotation	---
3719	144918_at	0.785982	3.04355	7.12884	4.78e-08	4.54e-07	7.98458	FBgn0052656	CG32656	CG32656	CG32656	32174	8061 // chitin binding // inferred from electronic annotation	6030 // chitin metabolism // inferred from electronic annotation	5576 // extracellular region // inferred from electronic annotation	IPR002557 // Chitin binding Peritrophin-A // 1.5E-8
9376	150575_at	0.78527	2.94401	5.58661	3.81e-06	2.44e-05	3.59424	FBgn0039310	CG11878	CG11878	CG11878	43050	5515 // protein binding // inferred from physical interaction /// 16301 // kinase activity // inferred from electronic annotation /// 16740 // transferase activity // inferred from electronic annotation	---	---	IPR004119 // Protein of unknown function DUF227 // 1.2E-123
1899	143098_at	0.78461	-0.0242446	4.77324	3.98e-05	0.000197667	1.26283	FBgn0000278	CG1878	CecB	Cecropin B	43598	---	6961 // antibacterial humoral response (sensu Protostomia) // inferred from direct assay /// 6961 // antibacterial humoral response (sensu Protostomia) // inferred from expression pattern /// 6961 // antibacterial humoral response (sensu Protostomia) // inferred from sequence or structural similarity /// 6961 // antibacterial humoral response (sensu Protostomia) // non-traceable author statement …	5576 // extracellular region // inferred from direct assay	IPR000875 // Cecropin // 3.8E-18
161	141360_at	0.784423	1.07294	10.4127	1.02e-11	2.43e-10	16.5151	FBgn0036659	CG9701	CG9701	CG9701	39872	15926 // glucosidase activity // inferred from electronic annotation /// 16787 // hydrolase activity // inferred from electronic annotation /// 16799 // hydrolase activity, hydrolyzing N-glycosyl compounds // inferred from electronic annotation /// 4553 // hydrolase activity, hydrolyzing O-glycosyl compounds // inferred from electronic annotation	5975 // carbohydrate metabolism // inferred from electronic annotation	---	IPR001360 // Glycoside hydrolase, family 1 // 1.0E-126
11641	152840_at	0.783472	1.74648	8.05912	3.8e-09	4.64e-08	10.5363	FBgn0039208	CG6643	CG6643	CG6643	42929	---	---	---	IPR000008 // C2 domain // 5.4E-26 /// IPR000008 // C2 domain // 3.2E-19 /// IPR000008 // C2 domain // 3.4E-24 /// IPR000008 // C2 domain // 5.4E-26 /// IPR000008 // C2 domain // 3.2E-19 /// IPR000008 // C2 domain // 3.4E-24
10297	151496_s_at	0.782982	3.95175	6.96615	7.52e-08	6.86e-07	7.52913	FBgn0027578	CG14526	CG14526	CG14526	43413	4245 // neprilysin activity // inferred from electronic annotation /// 8270 // zinc ion binding // inferred from electronic annotation /// 16511 // endothelin-converting enzyme activity // inferred from sequence or structural similarity /// 8233 // peptidase activity // inferred from electronic annotation /// 8237 // metallopeptidase activity // inferred from electronic annotation /// 16787 // hy…	6508 // proteolysis // inferred from electronic annotation /// 7165 // signal transduction // inferred from electronic annotation	16020 // membrane // inferred from electronic annotation	IPR008753 // Peptidase M13 // 9.3E-10 /// IPR000718 // Peptidase M13, neprilysin // 2.0E-46
11652	152851_at	0.780287	3.09263	9.8592	3.85e-11	7.58e-10	15.1742	FBgn0032618	CG31743	CG31743	CG31743	326156	16232 // HNK-1 sulfotransferase activity // inferred from sequence or structural similarity /// 5515 // protein binding // inferred from physical interaction /// 16232 // HNK-1 sulfotransferase activity // inferred from sequence similarity	---	---	IPR005331 // Chondroitin 4-O-sulfotransferase // 1.0E-126
467	141666_at	0.779844	2.47229	7.5782	1.39e-08	1.5e-07	9.22897	FBgn0046214	CG11844	CG11844	CG11844	43016	---	---	---	IPR006861 // Hyaluronan/mRNA binding protein // 6.0E-73 /// IPR006861 // Hyaluronan/mRNA binding protein // 6.0E-73
6025	147224_at	0.776005	0.949667	8.64795	8.08e-10	1.14e-08	12.0992	FBgn0033970	CG10205	CG10205	CG10205	36650	5515 // protein binding // inferred from physical interaction	---	---	---
13592	154791_at	0.773772	3.15238	4.99268	2.12e-05	0.000113341	1.8886	FBgn0031037	CG14207	CG14207	CG14207	32955	5515 // protein binding // inferred from physical interaction	---	---	IPR002068 // Heat shock protein Hsp20 // 2.4E-23 /// IPR002068 // Heat shock protein Hsp20 // 2.4E-23
1864	143063_at	0.772802	1.23242	9.7503	5.02e-11	9.59e-10	14.9056	---	CG3481 /// CG3484	---	---	---	4022 // alcohol dehydrogenase activity // inferred from direct assay /// 4022 // alcohol dehydrogenase activity // non-traceable author statement /// 4022 // alcohol dehydrogenase activity // traceable author statement /// 16491 // oxidoreductase activity // non-traceable author statement /// 51287 // NAD binding // traceable author statement /// 4022 // alcohol dehydrogenase activity // inferred…	6069 // ethanol oxidation // non-traceable author statement /// 48149 // behavioral response to ethanol // inferred from mutant phenotype /// 8152 // metabolism // inferred from electronic annotation /// 46164 // alcohol catabolism // inferred from mutant phenotype /// 6066 // alcohol metabolism // inferred from electronic annotation /// 6614 // SRP-dependent cotranslational protein targeting to …	5786 // signal recognition particle (sensu Eukaryota) // inferred from electronic annotation	---
12425	153624_at	0.767618	3.42582	13.2423	2.09e-14	1.18e-12	22.767	FBgn0032694	CG15162	MESR3	Misexpression suppressor of ras 3	35116	---	---	---	---
11417	152616_at	0.766139	3.93727	11.5643	7.33e-13	2.43e-11	19.1784	---	CG9008	---	---	---	4034 // aldose 1-epimerase activity // inferred from electronic annotation	6012 // galactose metabolism // inferred from electronic annotation	---	IPR008183 // Aldose 1-epimerase // 5.1E-59 /// IPR008183 // Aldose 1-epimerase // 1.7E-30
11360	152559_at	0.762353	1.78304	9.79211	4.54e-11	8.74e-10	15.0089	FBgn0003965	CG2155	v	vermilion	32026	4833 // tryptophan 2,3-dioxygenase activity // inferred from sequence or structural similarity /// 4833 // tryptophan 2,3-dioxygenase activity // traceable author statement /// 4833 // tryptophan 2,3-dioxygenase activity // inferred from electronic annotation /// 16491 // oxidoreductase activity // inferred from electronic annotation /// 16702 // oxidoreductase activity, acting on single donors w…	6569 // tryptophan catabolism // traceable author statement /// 6727 // ommochrome biosynthesis // inferred from mutant phenotype /// 6727 // ommochrome biosynthesis // non-traceable author statement /// 48072 // eye pigmentation (sensu Endopterygota) // traceable author statement /// 6568 // tryptophan metabolism // inferred from electronic annotation	---	IPR004981 // Tryptophan 2,3-dioxygenase // 1.0E-126
1216	142415_at	0.759909	3.74448	10.1217	2.04e-11	4.31e-10	15.8153	FBgn0013305	CG3798	Nmda1	N-methyl-D-aspartate receptor-associated protein	36419	1584 // rhodopsin-like receptor activity // inferred from electronic annotation /// 4972 // N-methyl-D-aspartate selective glutamate receptor activity // inferred from sequence or structural similarity /// 4872 // receptor activity // inferred from electronic annotation /// 4972 // N-methyl-D-aspartate selective glutamate receptor activity // inferred from sequence similarity	7186 // G-protein coupled receptor protein signaling pathway // inferred from electronic annotation /// 7601 // visual perception // inferred from electronic annotation	17146 // N-methyl-D-aspartate selective glutamate receptor complex // inferred from sequence or structural similarity /// 17146 // N-methyl-D-aspartate selective glutamate receptor complex // inferred from sequence similarity	IPR006214 // Protein of unknown function UPF0005 // 1.9E-72 /// IPR006214 // Protein of unknown function UPF0005 // 1.9E-72 /// IPR006214 // Protein of unknown function UPF0005 // 1.9E-72
11847	153046_at	0.757414	2.13045	8.38045	1.62e-09	2.14e-08	11.3945	FBgn0014031	CG3926	Spat	Serine pyruvate aminotransferase	31587	4760 // serine-pyruvate transaminase activity // inferred from sequence or structural similarity /// 4760 // serine-pyruvate transaminase activity // non-traceable author statement /// 8453 // alanine-glyoxylate transaminase activity // inferred from direct assay /// 8453 // alanine-glyoxylate transaminase activity // inferred from sequence or structural similarity /// 8483 // transaminase activi…	5975 // carbohydrate metabolism // inferred from electronic annotation /// 6952 // defense response // inferred from electronic annotation /// 9636 // response to toxin // inferred from electronic annotation /// 8152 // metabolism // inferred from electronic annotation	5759 // mitochondrial matrix // inferred from sequence or structural similarity /// 5777 // peroxisome // inferred from sequence or structural similarity /// 5759 // mitochondrial matrix // inferred from sequence similarity /// 5777 // peroxisome // inferred from sequence similarity	IPR000192 // Aminotransferase, class V // 3.0E-28
2659	143858_at	0.757101	2.96499	9.85272	3.91e-11	7.68e-10	15.1582	FBgn0015924	CG4280	crq	croquemort	33219	5044 // scavenger receptor activity // inferred from sequence or structural similarity /// 5044 // scavenger receptor activity // non-traceable author statement /// 5044 // scavenger receptor activity // traceable author statement /// 4872 // receptor activity // inferred from electronic annotation /// 5044 // scavenger receptor activity // inferred from sequence similarity	6909 // phagocytosis // inferred from mutant phenotype /// 6909 // phagocytosis // traceable author statement /// 6911 // phagocytosis, engulfment // traceable author statement /// 6915 // apoptosis // inferred from mutant phenotype /// 6915 // apoptosis // non-traceable author statement /// 6915 // apoptosis // traceable author statement /// 6952 // defense response // non-traceable author state…	5887 // integral to plasma membrane // non-traceable author statement /// 16020 // membrane // inferred from electronic annotation /// 16021 // integral to membrane // inferred from electronic annotation	IPR002159 // CD36 antigen // 1.0E-126
13627	154826_at	0.750656	2.52966	9.94851	3.1e-11	6.24e-10	15.3933	FBgn0032940	CG18362	Mio	Mlx interactor	35402	3700 // transcription factor activity // inferred from sequence or structural similarity /// 3700 // transcription factor activity // non-traceable author statement /// 5515 // protein binding // inferred from physical interaction /// 30528 // transcription regulator activity // inferred from electronic annotation /// 3700 // transcription factor activity // inferred from sequence similarity	45449 // regulation of transcription // inferred from sequence or structural similarity /// 7275 // development // inferred from electronic annotation /// 30154 // cell differentiation // inferred from electronic annotation /// 45449 // regulation of transcription // inferred from electronic annotation /// 45449 // regulation of transcription // inferred from sequence similarity	5634 // nucleus // inferred from sequence or structural similarity /// 5634 // nucleus // inferred from electronic annotation /// 5634 // nucleus // inferred from sequence similarity	IPR001092 // Basic helix-loop-helix dimerization domain bHLH // 2.1E-16 /// IPR001092 // Basic helix-loop-helix dimerization domain bHLH // 2.1E-16 /// IPR001092 // Basic helix-loop-helix dimerization domain bHLH // 2.1E-16 /// IPR001092 // Basic helix-loop-helix dimerization domain bHLH // 2.1E-16
498	141697_at	0.747994	3.78234	9.20383	1.95e-10	3.21e-09	13.5342	FBgn0010225	CG1106	Gel	Gelsolin	46008	3779 // actin binding // inferred from sequence or structural similarity /// 5200 // structural constituent of cytoskeleton // inferred from electronic annotation /// 5351 // sugar porter activity // inferred from electronic annotation /// 3779 // actin binding // inferred from electronic annotation /// 5509 // calcium ion binding // inferred from electronic annotation /// 3779 // actin binding /…	7010 // cytoskeleton organization and biogenesis // inferred from electronic annotation /// 9401 // phosphoenolpyruvate-dependent sugar phosphotransferase system // inferred from electronic annotation /// 30041 // actin filament polymerization // inferred from sequence or structural similarity	5576 // extracellular region // inferred from direct assay /// 5829 // cytosol // inferred from direct assay /// 5884 // actin filament // inferred from direct assay /// 5576 // extracellular region // inferred from expression pattern /// 5829 // cytosol // inferred from expression pattern /// 5856 // cytoskeleton // inferred from electronic annotation	IPR007123 // Gelsolin region // 5.9E-16 /// IPR007123 // Gelsolin region // 8.6E-15 /// IPR007123 // Gelsolin region // 2.6E-16 /// IPR007123 // Gelsolin region // 1.9E-7 /// IPR007123 // Gelsolin region // 7.5E-14 /// IPR007123 // Gelsolin region // 5.9E-16 /// IPR007123 // Gelsolin region // 8.6E-15 /// IPR007123 // Gelsolin region // 2.6E-16 /// IPR007123 // Gelsolin region // 1.9E-7 /// IPR00…
3065	144264_at	0.747434	2.55311	5.96659	1.28e-06	9.14e-06	4.68676	FBgn0028853	CG15263	CG15263	CG15263	34898	---	---	---	---
431	141630_at	0.747188	1.92767	10.3824	1.1e-11	2.57e-10	16.4429	FBgn0034728	CG6339	rad50	rad50	37564	3684 // damaged DNA binding // inferred from electronic annotation /// 4520 // endodeoxyribonuclease activity // inferred from electronic annotation /// 4529 // exodeoxyribonuclease activity // inferred from electronic annotation /// 5524 // ATP binding // inferred from electronic annotation /// 16829 // lyase activity // inferred from electronic annotation /// 16887 // ATPase activity // inferre…	723 // telomere maintenance // inferred from mutant phenotype /// 2168 // larval development (sensu Insecta) // inferred from mutant phenotype /// 6281 // DNA repair // inferred from sequence or structural similarity /// 6310 // DNA recombination // inferred from electronic annotation /// 7001 // chromosome organization and biogenesis (sensu Eukaryota) // inferred from mutant phenotype /// 722 //…	30870 // Mre11 complex // inferred from electronic annotation /// 793 // condensed chromosome // inferred from direct assay /// 781 // chromosome, telomeric region // inferred from electronic annotation /// 5634 // nucleus // inferred from electronic annotation /// 5694 // chromosome // inferred from electronic annotation /// 30870 // Mre11 complex // traceable author statement	IPR007517 // Rad50 zinc hook motif // 2.3E-19
13791	154990_at	0.743154	1.65398	8.14147	3.05e-09	3.79e-08	10.7574	FBgn0037680	CG8121	CG8121	CG8121	41113	5515 // protein binding // inferred from physical interaction	---	---	---
11081	152280_at	0.741361	1.45421	7.44955	1.97e-08	2.04e-07	8.87485	FBgn0030355	CG2467	CG2467	CG2467	32154	---	---	---	IPR001507 // Endoglin/CD105 antigen // 2.3E-10
9334	150533_at	0.740377	0.173233	8.38824	1.59e-09	2.11e-08	11.4151	FBgn0039239	CG13641	CG13641	CG13641	42969	---	---	---	---
1776	142975_at	0.738815	3.41151	7.65317	1.13e-08	1.24e-07	9.4345	FBgn0011673	CG7438	Myo31DF	Myosin 31DF	34445	3774 // motor activity // non-traceable author statement /// 3779 // actin binding // non-traceable author statement /// 5200 // structural constituent of cytoskeleton // inferred from electronic annotation /// 5524 // ATP binding // inferred from electronic annotation /// 42623 // ATPase activity, coupled // inferred from sequence or structural similarity /// 166 // nucleotide binding // inferre…	6886 // intracellular protein transport // inferred from electronic annotation /// 7498 // mesoderm development // inferred from expression pattern /// 7601 // visual perception // inferred from electronic annotation /// 7605 // sensory perception of sound // inferred from electronic annotation /// 16192 // vesicle-mediated transport // inferred from electronic annotation	5737 // cytoplasm // non-traceable author statement /// 16459 // myosin // inferred from sequence or structural similarity /// 16459 // myosin // inferred from electronic annotation /// 16459 // myosin // inferred from sequence similarity	IPR001609 // Myosin head (motor domain) // 1.0E-126 /// IPR000048 // IQ calmodulin-binding region // 3.1E-5 /// IPR010926 // Myosin tail 2 // 9.5E-74
13952	155151_at	0.732374	1.70935	14.3927	2.18e-15	1.71e-13	25.0429	FBgn0034312	CG10916	CG10916	CG10916	37081	5515 // protein binding // inferred from electronic annotation /// 8270 // zinc ion binding // inferred from electronic annotation /// 46872 // metal ion binding // inferred from electronic annotation	6512 // ubiquitin cycle // inferred from electronic annotation	5634 // nucleus // inferred from electronic annotation	IPR001841 // Zn-finger, RING // 9.1E-14
9178	150377_at	0.732207	1.11151	3.62273	0.00101473	0.00330468	-1.90615	FBgn0053110	CG33110	CG33110	CG33110	42659	8415 // acyltransferase activity // inferred from electronic annotation	38 // very-long-chain fatty acid metabolism // inferred from sequence or structural similarity /// 6633 // fatty acid biosynthesis // inferred from sequence or structural similarity /// 38 // very-long-chain fatty acid metabolism // inferred from sequence similarity /// 6633 // fatty acid biosynthesis // inferred from sequence similarity	16021 // integral to membrane // inferred from electronic annotation	IPR002076 // GNS1/SUR4 membrane protein // 1.8E-17
10889	152088_at	0.729268	3.52239	5.36541	7.22e-06	4.29e-05	2.95791	FBgn0027579	CG5508	CG5508	CG5508	43350	4366 // glycerol-3-phosphate O-acyltransferase activity // inferred from sequence or structural similarity /// 5515 // protein binding // inferred from physical interaction /// 4366 // glycerol-3-phosphate O-acyltransferase activity // inferred from electronic annotation /// 8415 // acyltransferase activity // inferred from electronic annotation /// 4366 // glycerol-3-phosphate O-acyltransferase …	7009 // plasma membrane organization and biogenesis // inferred from sequence or structural similarity /// 8654 // phospholipid biosynthesis // inferred from sequence or structural similarity /// 8152 // metabolism // inferred from electronic annotation /// 8654 // phospholipid biosynthesis // inferred from electronic annotation /// 44255 // cellular lipid metabolism // inferred from electronic a…	5741 // mitochondrial outer membrane // inferred from sequence or structural similarity /// 16020 // membrane // inferred from electronic annotation /// 5741 // mitochondrial outer membrane // inferred from sequence similarity	IPR002123 // Phospholipid/glycerol acyltransferase // 2.1E-20 /// IPR002123 // Phospholipid/glycerol acyltransferase // 2.1E-20 /// IPR002123 // Phospholipid/glycerol acyltransferase // 2.1E-20
8141	149340_at	0.728935	1.20274	10.7964	4.17e-12	1.1e-10	17.4213	FBgn0037345	CG2948	rev7	rev7	40677	5515 // protein binding // inferred from physical interaction	---	---	IPR003511 // DNA-binding HORMA // 1.0E-60
368	141567_at	0.72704	1.69009	9.26708	1.66e-10	2.79e-09	13.6949	FBgn0028894	CG5869	CG5869	CG5869	34963	3779 // actin binding // inferred from sequence or structural similarity /// 5200 // structural constituent of cytoskeleton // inferred from electronic annotation /// 5515 // protein binding // inferred from physical interaction /// 3779 // actin binding // inferred from electronic annotation /// 8083 // growth factor activity // inferred from electronic annotation /// 3779 // actin binding // in…	7398 // ectoderm development // inferred from electronic annotation /// 42063 // gliogenesis // inferred from sequence or structural similarity /// 42063 // gliogenesis // inferred from sequence similarity	5622 // intracellular // inferred from electronic annotation	IPR002108 // Actin-binding, cofilin/tropomyosin type // 6.3E-19
235	141434_at	0.727022	3.61886	9.21924	1.88e-10	3.11e-09	13.5734	FBgn0035165	CG13887	CG13887	CG13887	38096	5102 // receptor binding // inferred from electronic annotation /// 5515 // protein binding // inferred from physical interaction	6886 // intracellular protein transport // inferred from electronic annotation /// 6915 // apoptosis // inferred from electronic annotation /// 6952 // defense response // inferred from electronic annotation /// 19724 // B cell mediated immunity // inferred from electronic annotation	5783 // endoplasmic reticulum // inferred from electronic annotation /// 16021 // integral to membrane // inferred from electronic annotation	IPR008417 // B-cell receptor-associated 31-like // 1.3E-123
9981	151180_at	0.726759	-0.528382	5.39534	6.62e-06	3.97e-05	3.04398	---	---	---	---	---	---	---	---	---
1592	142791_at	0.724999	5.37603	7.25866	3.34e-08	3.3e-07	8.34621	FBgn0004922	CG10944	RpS6	Ribosomal protein S6	31700	3676 // nucleic acid binding // inferred from electronic annotation /// 3735 // structural constituent of ribosome // inferred from sequence or structural similarity /// 3735 // structural constituent of ribosome // non-traceable author statement /// 3735 // structural constituent of ribosome // inferred from electronic annotation /// 3735 // structural constituent of ribosome // inferred from se…	6412 // protein biosynthesis // inferred from sequence or structural similarity /// 6412 // protein biosynthesis // non-traceable author statement /// 6445 // regulation of translation // inferred from electronic annotation /// 6955 // immune response // traceable author statement /// 6412 // protein biosynthesis // inferred from electronic annotation /// 6412 // protein biosynthesis // inferred …	5840 // ribosome // non-traceable author statement /// 5843 // cytosolic small ribosomal subunit (sensu Eukaryota) // inferred from sequence or structural similarity /// 5843 // cytosolic small ribosomal subunit (sensu Eukaryota) // non-traceable author statement /// 5622 // intracellular // inferred from electronic annotation /// 5840 // ribosome // inferred from electronic annotation /// 30529 …	IPR001377 // Ribosomal protein S6e // 1.1E-88 /// IPR001377 // Ribosomal protein S6e // 2.2E-66 /// IPR001377 // Ribosomal protein S6e // 1.9E-91
8952	150151_at	0.724004	2.99004	6.79959	1.2e-07	1.04e-06	7.06039	FBgn0038631	CG7695	CG7695	CG7695	42234	---	---	---	---
1473	142672_at	0.723631	1.60525	8.63159	8.43e-10	1.18e-08	12.0563	FBgn0039099	CG10157	CG10157	CG10157	42788	5515 // protein binding // inferred from physical interaction	---	---	IPR004911 // Gamma interferon inducible lysosomal thiol reductase GILT // 5.7E-56
2759	143958_at	0.722516	4.25572	5.12267	1.45e-05	8.12e-05	2.26083	FBgn0022355	CG6186	Tsf1	Transferrin 1	32821	5381 // iron ion transporter activity // inferred from sequence or structural similarity /// 5381 // iron ion transporter activity // non-traceable author statement /// 5386 // carrier activity // inferred from electronic annotation /// 8199 // ferric iron binding // inferred from sequence or structural similarity /// 8199 // ferric iron binding // inferred from electronic annotation /// 5381 // …	6826 // iron ion transport // non-traceable author statement /// 6879 // iron ion homeostasis // inferred from sequence or structural similarity /// 6952 // defense response // non-traceable author statement /// 6826 // iron ion transport // inferred from electronic annotation /// 6879 // iron ion homeostasis // inferred from electronic annotation /// 6879 // iron ion homeostasis // inferred from…	5576 // extracellular region // inferred from electronic annotation	IPR001156 // Peptidase S60, transferrin lactoferrin // 8.1E-9 /// IPR001156 // Peptidase S60, transferrin lactoferrin // 1.4E-4 /// IPR001156 // Peptidase S60, transferrin lactoferrin // 0.013
12929	154128_at	0.720602	2.24358	12.8745	4.44e-14	2.2e-12	22.0085	FBgn0012051	CG7563	CalpA	Calpain-A	37232	4198 // calpain activity // non-traceable author statement /// 5509 // calcium ion binding // inferred from electronic annotation /// 5516 // calmodulin binding // inferred from electronic annotation /// 5515 // protein binding // inferred from physical interaction /// 4198 // calpain activity // inferred from direct assay /// 4197 // cysteine-type endopeptidase activity // inferred from electron…	6508 // proteolysis // inferred from electronic annotation /// 16540 // protein autoprocessing // traceable author statement /// 19538 // protein metabolism // inferred from electronic annotation /// 30036 // actin cytoskeleton organization and biogenesis // non-traceable author statement /// 6508 // proteolysis // inferred from direct assay	5737 // cytoplasm // non-traceable author statement /// 5622 // intracellular // inferred from direct assay /// 15629 // actin cytoskeleton // inferred from direct assay /// 43025 // cell soma // inferred from direct assay /// 5622 // intracellular // inferred from electronic annotation	IPR001300 // Peptidase C2, calpain // 1.0E-126 /// IPR002048 // Calcium-binding EF-hand // 9.9E-6 /// IPR002048 // Calcium-binding EF-hand // 0.0069 /// IPR001300 // Peptidase C2, calpain // 7.3E-107
1840	143039_at	0.719866	1.48913	10.2017	1.69e-11	3.69e-10	16.0088	FBgn0028411	CG12752	Nxt1	NTF2-related export protein 1	37769	8565 // protein transporter activity // inferred from electronic annotation /// 5215 // transporter activity // inferred from electronic annotation	6406 // mRNA export from nucleus // non-traceable author statement /// 6408 // snRNA export from nucleus // non-traceable author statement /// 6409 // tRNA export from nucleus // non-traceable author statement /// 6606 // protein import into nucleus // inferred from electronic annotation /// 6611 // protein export from nucleus // non-traceable author statement /// 16973 // poly(A)+ mRNA export fr…	5634 // nucleus // non-traceable author statement /// 5635 // nuclear envelope // inferred from direct assay /// 5654 // nucleoplasm // inferred from direct assay /// 5737 // cytoplasm // inferred from direct assay /// 5622 // intracellular // inferred from electronic annotation /// 5634 // nucleus // inferred from electronic annotation	IPR002075 // Nuclear transport factor 2 (NTF2) // 3.0E-36
5674	146873_at	0.719253	2.48895	9.13105	2.35e-10	3.82e-09	13.3486	FBgn0033397	CG10843	Cyp4p3	Cyp4p3	35948	4497 // monooxygenase activity // inferred from electronic annotation /// 16491 // oxidoreductase activity // inferred from electronic annotation /// 5506 // iron ion binding // inferred from electronic annotation /// 20037 // heme binding // inferred from electronic annotation /// 46872 // metal ion binding // inferred from electronic annotation	6118 // electron transport // inferred from electronic annotation /// 8202 // steroid metabolism // inferred from electronic annotation	5792 // microsome // non-traceable author statement /// 16020 // membrane // non-traceable author statement /// 5783 // endoplasmic reticulum // inferred from electronic annotation /// 5792 // microsome // inferred from electronic annotation /// 16020 // membrane // inferred from electronic annotation	IPR001128 // Cytochrome P450 // 3.6E-92
13561	154760_at	0.717585	1.76254	10.9281	3.08e-12	8.54e-11	17.7281	FBgn0035589	CG4618	CG4618	CG4618	38599	---	---	---	IPR005024 // Snf7 // 1.2E-59
3028	144227_at	0.716588	4.88944	5.56751	4.03e-06	2.55e-05	3.53929	FBgn0028526	CG15293	CG15293	CG15293	34828	---	---	---	---
6317	147516_at	0.715243	4.48244	7.34855	2.6e-08	2.63e-07	8.59562	FBgn0034470	CG11218	Obp56d	Odorant-binding protein 56d	37266	5549 // odorant binding // inferred from electronic annotation /// 5549 // odorant binding // inferred from sequence or structural similarity /// 5549 // odorant binding // non-traceable author statement /// 5549 // odorant binding // inferred from sequence similarity	6810 // transport // inferred from electronic annotation /// 7606 // sensory perception of chemical stimulus // inferred from sequence or structural similarity /// 19236 // response to pheromone // inferred from sequence or structural similarity /// 42048 // olfactory behavior // inferred from sequence or structural similarity /// 7608 // sensory perception of smell // inferred from expression pa…	5576 // extracellular region // inferred from sequence or structural similarity /// 5576 // extracellular region // inferred from sequence similarity	IPR006170 // Pheromone/general odorant binding protein, PBP/GOBP // 1.9E-31
5511	146710_at	0.714928	1.92361	10.6481	5.88e-12	1.49e-10	17.0735	FBgn0033127	CG12845	Tsp42Ef	Tetraspanin 42Ef	35615	---	---	16021 // integral to membrane // inferred from sequence or structural similarity /// 16021 // integral to membrane // inferred from electronic annotation /// 16021 // integral to membrane // inferred from sequence similarity	IPR000301 // CD9/CD37/CD63 antigen // 1.7E-28
13660	154859_at	0.714347	1.56007	4.16649	0.000224589	0.000903905	-0.439298	FBgn0032597	CG17904	CG17904	CG17904	35000	166 // nucleotide binding // inferred from sequence or structural similarity /// 5515 // protein binding // inferred from physical interaction /// 166 // nucleotide binding // inferred from sequence similarity	---	---	---
1199	142398_at	0.714011	0.828601	14.9106	8.25e-16	7.31e-14	26.0225	FBgn0033630	CG13200	CG13200	CG13200	36231	---	---	---	---
4878	146077_at	0.713883	1.98776	3.03664	0.00477773	0.0124324	-3.38743	FBgn0028433	CG3694	G30A	G protein 30A	45234	3924 // GTPase activity // inferred from physical interaction /// 3924 // GTPase activity // inferred from sequence or structural similarity /// 3924 // GTPase activity // non-traceable author statement /// 4871 // signal transducer activity // inferred from electronic annotation /// 3924 // GTPase activity // inferred from sequence similarity	7186 // G-protein coupled receptor protein signaling pathway // non-traceable author statement /// 7602 // phototransduction // inferred from physical interaction /// 7165 // signal transduction // inferred from electronic annotation /// 7186 // G-protein coupled receptor protein signaling pathway // inferred from electronic annotation /// 7601 // visual perception // inferred from electronic ann…	5737 // cytoplasm // inferred from direct assay /// 5834 // heterotrimeric G-protein complex // inferred from physical interaction /// 5834 // heterotrimeric G-protein complex // non-traceable author statement /// 16028 // rhabdomere // inferred from direct assay /// 5834 // heterotrimeric G-protein complex // inferred from electronic annotation /// 16020 // membrane // inferred from electronic a…	IPR001770 // G-protein, gamma subunit // 2.3E-13
2271	143470_at	0.713235	1.04224	8.33901	1.81e-09	2.37e-08	11.2845	FBgn0004431	CG9120	LysX	Lysozyme X	38122	3796 // lysozyme activity // inferred from sequence or structural similarity /// 3796 // lysozyme activity // non-traceable author statement /// 3796 // lysozyme activity // inferred from electronic annotation /// 3824 // catalytic activity // inferred from electronic annotation /// 16787 // hydrolase activity // inferred from electronic annotation /// 16798 // hydrolase activity, acting on glyco…	6952 // defense response // inferred from sequence or structural similarity /// 6960 // antimicrobial humoral response (sensu Protostomia) // non-traceable author statement /// 16998 // cell wall catabolism // inferred from electronic annotation /// 5975 // carbohydrate metabolism // inferred from electronic annotation /// 19835 // cytolysis // inferred from electronic annotation /// 42742 // def…	5576 // extracellular region // inferred from electronic annotation	IPR001916 // Glycoside hydrolase, family 22 // 2.4E-55
4589	145788_at	0.710738	2.10562	7.09435	5.26e-08	4.97e-07	7.88822	FBgn0031643	CG3008	CG3008	CG3008	33693	4672 // protein kinase activity // non-traceable author statement /// 16301 // kinase activity // inferred from electronic annotation /// 16740 // transferase activity // inferred from electronic annotation	6468 // protein amino acid phosphorylation // inferred from electronic annotation	---	IPR000687 // Protein of unknown function RIO1 // 5.4E-107
2118	143317_at	0.710411	3.24356	8.61206	8.87e-10	1.24e-08	12.0051	FBgn0003205	CG9375	Ras85D	Ras oncogene at 85D	41140	3924 // GTPase activity // inferred from sequence or structural similarity /// 3924 // GTPase activity // non-traceable author statement /// 5525 // GTP binding // inferred from electronic annotation /// 19003 // GDP binding // non-traceable author statement /// 166 // nucleotide binding // inferred from electronic annotation /// 5525 // GTP binding // non-traceable author statement /// 3924 // G…	82 // G1/S transition of mitotic cell cycle // traceable author statement /// 1558 // regulation of cell growth // traceable author statement /// 1708 // cell fate specification // traceable author statement /// 6886 // intracellular protein transport // inferred from electronic annotation /// 6898 // receptor mediated endocytosis // inferred from electronic annotation /// 6916 // anti-apoptosis …	5622 // intracellular // inferred from electronic annotation /// 16020 // membrane // inferred from electronic annotation	IPR001806 // Ras GTPase superfamily // 1.5E-93
8523	149722_at	0.705124	2.26806	6.37969	3.92e-07	3.1e-06	5.86909	FBgn0037973	CG18547	CG18547	CG18547	41452	16491 // oxidoreductase activity // inferred from electronic annotation	---	---	IPR001395 // Aldo/keto reductase // 1.1E-29
7478	148677_at	0.704887	2.78147	6.5634	2.33e-07	1.92e-06	6.39186	FBgn0036320	CG10943	CG10943	CG10943	39462	---	---	---	---
11188	152387_at	0.702006	1.91495	4.02441	0.000334704	0.00128015	-0.829204	FBgn0027544	CG2217	CG2217	CG2217	43607	5515 // protein binding // inferred from physical interaction	---	---	---
5063	146262_at	0.701317	1.26696	11.6637	5.88e-13	1.99e-11	19.4004	FBgn0032387	CG16965	CG16965	CG16965	34607	4555 // alpha,alpha-trehalase activity // inferred from sequence or structural similarity /// 4645 // phosphorylase activity // inferred from electronic annotation /// 4555 // alpha,alpha-trehalase activity // inferred from sequence similarity	5996 // monosaccharide metabolism // inferred from electronic annotation	---	IPR005195 // Glycoside hydrolase, family 65, central catalytic // 1.0E-126
10737	151936_at	0.700199	3.52271	12.2719	1.57e-13	6.44e-12	20.7323	FBgn0030726	CG9216	CG9216	CG9216	32576	---	---	---	---
11148	152347_at	0.698628	2.97396	6.6047	2.07e-07	1.73e-06	6.50905	FBgn0039628	CG11841	CG11841	CG11841	43430	4252 // serine-type endopeptidase activity // inferred from sequence or structural similarity /// 4263 // chymotrypsin activity // inferred from electronic annotation /// 4295 // trypsin activity // non-traceable author statement /// 4252 // serine-type endopeptidase activity // inferred from electronic annotation /// 4252 // serine-type endopeptidase activity // inferred from sequence similarity	6508 // proteolysis // non-traceable author statement /// 6508 // proteolysis // inferred from electronic annotation	---	IPR001254 // Peptidase S1, chymotrypsin // 2.1E-47 /// IPR001254 // Peptidase S1, chymotrypsin // 3.6E-26
6347	147546_at	0.697039	2.07528	3.68063	0.000866505	0.00288973	-1.75352	FBgn0034511	CG13422	CG13422	CG13422	37313	15926 // glucosidase activity // inferred from electronic annotation /// 5515 // protein binding // inferred from physical interaction	5976 // polysaccharide metabolism // inferred from electronic annotation /// 6952 // defense response // inferred from electronic annotation /// 50829 // defense response to Gram-negative bacteria // inferred from sequence or structural similarity /// 50829 // defense response to Gram-negative bacteria // inferred from sequence similarity	---	---
12879	154078_at	0.696296	4.14292	8.05267	3.87e-09	4.71e-08	10.5189	FBgn0014469	CG2060	Cyp4e2	Cytochrome P450-4e2	35822	4497 // monooxygenase activity // inferred from electronic annotation /// 16491 // oxidoreductase activity // inferred from electronic annotation /// 5515 // protein binding // inferred from physical interaction /// 5506 // iron ion binding // inferred from electronic annotation /// 20037 // heme binding // inferred from electronic annotation /// 46872 // metal ion binding // inferred from electr…	6118 // electron transport // inferred from electronic annotation /// 8202 // steroid metabolism // inferred from electronic annotation	5792 // microsome // non-traceable author statement /// 16020 // membrane // non-traceable author statement /// 5783 // endoplasmic reticulum // inferred from electronic annotation /// 5792 // microsome // inferred from electronic annotation /// 16020 // membrane // inferred from electronic annotation	IPR001128 // Cytochrome P450 // 2.3E-94
10763	151962_at	0.696271	2.30279	4.7929	3.76e-05	0.000188003	1.31873	FBgn0034920	CG5597	CG5597	CG5597	37789	---	---	---	IPR007110 // Immunoglobulin-like // 5.7E-5
7251	148450_at	0.69455	1.57517	9.42148	1.13e-10	1.97e-09	14.0851	FBgn0035968	CG4484	CG4484	CG4484	39055	8506 // sucrose:hydrogen symporter activity // inferred from sequence or structural similarity /// 5515 // protein binding // inferred from physical interaction /// 8506 // sucrose:hydrogen symporter activity // inferred from sequence similarity	5975 // carbohydrate metabolism // inferred from electronic annotation /// 8643 // carbohydrate transport // inferred from electronic annotation	---	---
13060	154259_at	0.694199	1.4134	7.07322	5.58e-08	5.22e-07	7.82915	FBgn0028990	CG11331	Spn27A	Serpin-27A	45815	4857 // enzyme inhibitor activity // inferred from direct assay /// 4867 // serine-type endopeptidase inhibitor activity // inferred from sequence or structural similarity /// 4867 // serine-type endopeptidase inhibitor activity // non-traceable author statement /// 4867 // serine-type endopeptidase inhibitor activity // inferred from electronic annotation /// 4867 // serine-type endopeptidase in…	8063 // Toll signaling pathway // inferred from direct assay /// 9611 // response to wounding // inferred from mutant phenotype /// 9613 // response to pest, pathogen or parasite // inferred from mutant phenotype /// 9950 // dorsal/ventral axis specification // inferred from mutant phenotype /// 35006 // melanization defense response // traceable author statement /// 35009 // negative regulation …	---	IPR000215 // Serpin // 4.8E-74
8353	149552_s_at	0.684386	1.20909	7.85183	6.62e-09	7.6e-08	9.97608	FBgn0037683	CG18473	CG18473	CG18473	41116	4063 // aryldialkylphosphatase activity // inferred from sequence or structural similarity /// 8270 // zinc ion binding // inferred from electronic annotation /// 16787 // hydrolase activity // non-traceable author statement /// 16787 // hydrolase activity // inferred from electronic annotation /// 16788 // hydrolase activity, acting on ester bonds // inferred from electronic annotation /// 46872…	9056 // catabolism // inferred from electronic annotation	---	IPR001559 // Aryldialkylphosphatase // 4.2E-90
1136	142335_at	0.68393	2.56786	6.79018	1.23e-07	1.07e-06	7.03384	FBgn0037063	CG9391	CG9391	CG9391	40346	8934 // inositol-1(or 4)-monophosphatase activity // non-traceable author statement /// 4437 // inositol or phosphatidylinositol phosphatase activity // inferred from electronic annotation	6644 // phospholipid metabolism // inferred from electronic annotation /// 7242 // intracellular signaling cascade // inferred from electronic annotation /// 16311 // dephosphorylation // non-traceable author statement	---	IPR000760 // Inositol monophosphatase // 5.2E-109 /// IPR000760 // Inositol monophosphatase // 5.2E-109
12327	153526_at	0.68328	1.7759	10.9774	2.75e-12	7.75e-11	17.8423	FBgn0034417	CG15117	CG15117	CG15117	37197	4566 // beta-glucuronidase activity // inferred from sequence or structural similarity /// 8237 // metallopeptidase activity // inferred from electronic annotation /// 8270 // zinc ion binding // inferred from electronic annotation /// 4553 // hydrolase activity, hydrolyzing O-glycosyl compounds // inferred from electronic annotation /// 4566 // beta-glucuronidase activity // inferred from sequen…	5975 // carbohydrate metabolism // inferred from electronic annotation /// 6508 // proteolysis // inferred from electronic annotation	---	IPR006103 // Glycoside hydrolase, family 2, TIM barrel domain // 4.4E-86 /// IPR006102 // Glycoside hydrolase family 2, immunoglobulin-like beta-sandwich domain // 1.3E-27 /// IPR006104 // Glycoside hydrolase, family 2, sugar binding // 9.9E-45 /// IPR006103 // Glycoside hydrolase, family 2, TIM barrel domain // 4.4E-86 /// IPR006102 // Glycoside hydrolase family 2, immunoglobulin-like beta-sandw…
9058	150257_at	0.683029	3.23839	4.33547	0.000139243	0.000594756	0.0293605	FBgn0038790	CG5097	MtnC	Metallothionein C	42416	46872 // metal ion binding // inferred from electronic annotation	---	---	IPR000966 // Diptera metallothionein, family 5 // 8.7E-17
12534	153733_at	0.681885	1.81439	8.25499	2.26e-09	2.89e-08	11.0609	FBgn0004611	CG4574	Plc21C	Phospholipase C at 21C	33204	4435 // phosphoinositide phospholipase C activity // inferred from sequence or structural similarity /// 4435 // phosphoinositide phospholipase C activity // non-traceable author statement /// 4435 // phosphoinositide phospholipase C activity // inferred from electronic annotation /// 4629 // phospholipase C activity // inferred from electronic annotation /// 4871 // signal transducer activity //…	6651 // diacylglycerol biosynthesis // non-traceable author statement /// 6661 // phosphatidylinositol biosynthesis // non-traceable author statement /// 7186 // G-protein coupled receptor protein signaling pathway // inferred from electronic annotation /// 7242 // intracellular signaling cascade // inferred from electronic annotation /// 6629 // lipid metabolism // inferred from electronic annot…	---	IPR000909 // Phosphatidylinositol-specific phospholipase C, X domain // 1.9E-97 /// IPR001711 // Phosphatidylinositol-specific phospholipase C, Y domain // 6.8E-86 /// IPR000008 // C2 domain // 3.7E-15
11111	152310_at	0.680889	1.389	10.2344	1.56e-11	3.47e-10	16.0876	FBgn0038966	CG13848	CG13848	CG13848	42635	5386 // carrier activity // inferred from electronic annotation /// 8431 // vitamin E binding // inferred from sequence or structural similarity /// 8431 // vitamin E binding // inferred from sequence similarity	---	---	---
1832	143031_at	0.680734	1.64654	10.9989	2.62e-12	7.47e-11	17.8919	FBgn0032026	CG7627	CG7627	CG7627	34148	166 // nucleotide binding // inferred from electronic annotation /// 5215 // transporter activity // inferred from sequence or structural similarity /// 5524 // ATP binding // inferred from electronic annotation /// 8559 // xenobiotic-transporting ATPase activity // inferred from sequence or structural similarity /// 42626 // ATPase activity, coupled to transmembrane movement of substances // inf…	6858 // extracellular transport // inferred from electronic annotation /// 6952 // defense response // inferred from electronic annotation /// 9636 // response to toxin // inferred from electronic annotation /// 6810 // transport // inferred from electronic annotation	16021 // integral to membrane // inferred from electronic annotation /// 43190 // ATP-binding cassette (ABC) transporter complex // inferred from sequence or structural similarity /// 16020 // membrane // inferred from electronic annotation /// 43190 // ATP-binding cassette (ABC) transporter complex // inferred from sequence similarity	IPR001140 // ABC transporter, transmembrane region // 1.5E-20 /// IPR001140 // ABC transporter, transmembrane region // 6.7E-20 /// IPR003439 // ABC transporter // 2.4E-53 /// IPR003439 // ABC transporter // 9.9E-47
1196	142395_at	0.677882	2.64996	5.9069	1.52e-06	1.06e-05	4.51534	FBgn0028543	CG31839	CG31839	CG31839	260645	5102 // receptor binding // inferred from electronic annotation /// 5198 // structural molecule activity // inferred from electronic annotation	7160 // cell-matrix adhesion // inferred from electronic annotation /// 7165 // signal transduction // inferred from electronic annotation /// 7498 // mesoderm development // inferred from expression pattern	5576 // extracellular region // inferred from sequence or structural similarity /// 5576 // extracellular region // inferred from sequence similarity	---
2680	143879_at	0.67735	3.70533	6.32114	4.63e-07	3.62e-06	5.70204	FBgn0016700	CG3320	Rab1	Rab-protein 1	42524	3677 // DNA binding // inferred from electronic annotation /// 3924 // GTPase activity // inferred from sequence or structural similarity /// 5525 // GTP binding // inferred from electronic annotation /// 5524 // ATP binding // inferred from electronic annotation /// 8134 // transcription factor binding // inferred from electronic annotation /// 3924 // GTPase activity // inferred from sequence s…	160 // two-component signal transduction system (phosphorelay) // inferred from electronic annotation /// 6355 // regulation of transcription, DNA-dependent // inferred from electronic annotation /// 6886 // intracellular protein transport // inferred from electronic annotation /// 6888 // ER to Golgi vesicle-mediated transport // traceable author statement /// 6897 // endocytosis // inferred fro…	5622 // intracellular // inferred from electronic annotation	IPR001806 // Ras GTPase superfamily // 2.6E-103 /// IPR001806 // Ras GTPase superfamily // 4.3E-81
1175	142374_at	0.675838	2.65462	9.70741	5.58e-11	1.06e-09	14.7993	FBgn0038349	CG6045	CG6045	CG6045	41896	4854 // xanthine dehydrogenase activity // inferred from sequence or structural similarity /// 5506 // iron ion binding // inferred from electronic annotation /// 16491 // oxidoreductase activity // inferred from electronic annotation /// 30151 // molybdenum ion binding // inferred from electronic annotation /// 46872 // metal ion binding // inferred from electronic annotation /// 51536 // iron-s…	6118 // electron transport // inferred from electronic annotation /// 6144 // purine base metabolism // inferred from electronic annotation /// 6800 // oxygen and reactive oxygen species metabolism // inferred from electronic annotation /// 6952 // defense response // inferred from electronic annotation	---	IPR008274 // Aldehyde oxidase and xanthine dehydrogenase, molybdopterin binding // 5.8E-125 /// IPR002346 // Molybdopterin dehydrogenase, FAD-binding // 2.1E-9 /// IPR000674 // Aldehyde oxidase and xanthine dehydrogenase, a/b hammerhead // 3.3E-26 /// IPR002888 // [2Fe-2S]-binding // 6.2E-47 /// IPR005107 // CO dehydrogenase flavoprotein C-terminal domain // 2.6E-17 /// IPR001041 // Ferredoxin //…
9514	150713_at	0.675673	0.81728	9.99045	2.8e-11	5.71e-10	15.4958	FBgn0039488	CG6066	CG6066	CG6066	43267	---	---	---	IPR009269 // Protein of unknown function DUF926 // 3.7E-91
13253	154452_at	0.67565	3.08502	7.20375	3.88e-08	3.79e-07	8.19343	FBgn0040236	CG12132	c11.1	c11.1	53436	5515 // protein binding // inferred from physical interaction /// 5488 // binding // inferred from electronic annotation	---	---	---
607	141806_at	0.674761	2.03941	8.94416	3.77e-10	5.8e-09	12.8688	FBgn0052158	CG32158	CG32158	CG32158	39835	4016 // adenylate cyclase activity // inferred from sequence or structural similarity /// 4016 // adenylate cyclase activity // non-traceable author statement /// 4383 // guanylate cyclase activity // inferred from electronic annotation /// 16829 // lyase activity // inferred from electronic annotation /// 16849 // phosphorus-oxygen lyase activity // inferred from electronic annotation /// 4016 /…	7186 // G-protein coupled receptor protein signaling pathway // inferred from electronic annotation /// 7242 // intracellular signaling cascade // inferred from electronic annotation /// 9187 // cyclic nucleotide metabolism // inferred from electronic annotation /// 9190 // cyclic nucleotide biosynthesis // inferred from electronic annotation	16021 // integral to membrane // inferred from electronic annotation	IPR001054 // Guanylate cyclase // 3.7E-61 /// IPR001054 // Guanylate cyclase // 1.6E-77 /// IPR009398 // Protein of unknown function DUF1053 // 3.6E-31
479	141678_at	0.674517	1.90076	8.49721	1.2e-09	1.63e-08	11.7032	FBgn0030318	CG1697	rho-4	rhomboid-4	32109	5057 // receptor signaling protein activity // inferred from electronic annotation /// 5102 // receptor binding // inferred from electronic annotation /// 5509 // calcium ion binding // inferred from electronic annotation /// 8236 // serine-type peptidase activity // non-traceable author statement	7292 // female gamete generation // inferred from electronic annotation /// 7398 // ectoderm development // inferred from electronic annotation /// 7399 // nervous system development // inferred from electronic annotation	5886 // plasma membrane // non-traceable author statement /// 16021 // integral to membrane // non-traceable author statement	IPR002048 // Calcium-binding EF-hand // 5.0E-5 /// IPR002048 // Calcium-binding EF-hand // 1.4E-4 /// IPR002610 // Peptidase S54, rhomboid-like protein // 1.0E-34
12555	153754_at	0.670496	1.48693	9.45263	1.05e-10	1.85e-09	14.1634	FBgn0031457	CG3077	CG3077	CG3077	33466	5515 // protein binding // inferred from electronic annotation /// 35091 // phosphoinositide binding // inferred from electronic annotation	7242 // intracellular signaling cascade // inferred from electronic annotation	---	IPR001683 // Phox-like // 8.4E-26
12572	153771_at	0.669273	2.54987	7.89183	5.95e-09	6.91e-08	10.0846	FBgn0002645	CG1483	Map205	Microtubule-associated protein 205	43765	8017 // microtubule binding // inferred from sequence or structural similarity /// 8017 // microtubule binding // non-traceable author statement /// 8017 // microtubule binding // inferred from sequence similarity	7017 // microtubule-based process // inferred from sequence or structural similarity /// 7017 // microtubule-based process // non-traceable author statement /// 7017 // microtubule-based process // inferred from sequence similarity	5875 // microtubule associated complex // inferred from direct assay /// 5875 // microtubule associated complex // inferred from sequence or structural similarity /// 5876 // spindle microtubule // non-traceable author statement /// 5881 // cytoplasmic microtubule // non-traceable author statement /// 5874 // microtubule // inferred from electronic annotation /// 5875 // microtubule associated co…	---
4789	145988_at	0.667604	2.96337	5.82914	1.9e-06	1.3e-05	4.2919	FBgn0040099	CG7106	lectin-28C	lectin-28C	53542	5534 // galactose binding // inferred from sequence or structural similarity /// 5515 // protein binding // inferred from physical interaction /// 1584 // rhodopsin-like receptor activity // inferred from electronic annotation /// 4871 // signal transducer activity // inferred from electronic annotation /// 4872 // receptor activity // inferred from electronic annotation /// 4930 // G-protein cou…	7283 // spermatogenesis // inferred from electronic annotation /// 8594 // photoreceptor cell morphogenesis (sensu Endopterygota) // inferred from mutant phenotype /// 42052 // rhabdomere development // inferred from mutant phenotype /// 7165 // signal transduction // inferred from electronic annotation /// 7186 // G-protein coupled receptor protein signaling pathway // inferred from electronic a…	16027 // inaD signaling complex // inferred from physical interaction /// 5767 // secondary lysosome // inferred from direct assay /// 5771 // multivesicular body // inferred from direct assay /// 5791 // rough endoplasmic reticulum // inferred from direct assay /// 16023 // cytoplasmic membrane-bound vesicle // inferred from direct assay /// 16028 // rhabdomere // inferred from direct assay /// …	IPR001304 // C-type lectin // 4.8E-14 /// IPR001304 // C-type lectin // 4.8E-14
11372	152571_at	0.667275	1.34825	12.2291	1.72e-13	6.96e-12	20.6401	FBgn0038115	CG7966	CG7966	CG7966	41610	8430 // selenium binding // inferred from sequence or structural similarity /// 8430 // selenium binding // inferred from electronic annotation /// 8430 // selenium binding // inferred from sequence similarity	6952 // defense response // inferred from electronic annotation	---	IPR008826 // 56kDa selenium binding // 1.0E-126
7707	148906_s_at	0.665275	0.736934	4.61745	6.23e-05	0.000294915	0.821188	FBgn0042177 /// FBgn0042178	CG32165 /// CG32164	CG32164 /// CG32165	CG32164 /// CG32165	59215 /// 59216	8565 // protein transporter activity // inferred from electronic annotation /// 5488 // binding // inferred from electronic annotation	59 // protein import into nucleus, docking // inferred from electronic annotation	5634 // nucleus // inferred from electronic annotation /// 5643 // nuclear pore // inferred from electronic annotation /// 5737 // cytoplasm // inferred from electronic annotation	IPR001494 // Importin-beta, N-terminal // 8.6E-7
5830	147029_s_at	0.663689	3.86209	5.19792	1.17e-05	6.67e-05	2.47669	FBgn0033644 /// FBgn0050035	CG30035 /// CG8234	CG8234 /// CG30035	CG8234 /// CG30035	36248 /// 36249	5351 // sugar porter activity // inferred from electronic annotation /// 5355 // glucose transporter activity // inferred from sequence or structural similarity /// 5353 // fructose transporter activity // inferred from sequence or structural similarity /// 5215 // transporter activity // inferred from electronic annotation /// 5355 // glucose transporter activity // inferred from sequence simila…	5975 // carbohydrate metabolism // inferred from electronic annotation /// 8643 // carbohydrate transport // inferred from sequence or structural similarity /// 8643 // carbohydrate transport // inferred from electronic annotation /// 6810 // transport // inferred from electronic annotation /// 8643 // carbohydrate transport // inferred from sequence similarity	16021 // integral to membrane // inferred from sequence or structural similarity /// 16020 // membrane // inferred from electronic annotation /// 16021 // integral to membrane // inferred from electronic annotation /// 16021 // integral to membrane // inferred from sequence similarity	IPR005828 // General substrate transporter // 9.9E-99 /// IPR005828 // General substrate transporter // 9.9E-99 /// IPR005828 // General substrate transporter // 2.5E-103 /// IPR005828 // General substrate transporter // 3.7E-101
8007	149206_at	0.663519	1.7268	7.69787	1e-08	1.11e-07	9.55673	FBgn0037126	CG14567	CG14567	CG14567	40420	---	---	---	---
11533	152732_at	0.663217	2.59607	9.01273	3.17e-10	4.94e-09	13.0454	FBgn0036997	CG5955	CG5955	CG5955	40268	3978 // UDP-glucose 4-epimerase activity // inferred from sequence or structural similarity /// 3824 // catalytic activity // inferred from electronic annotation /// 51287 // NAD binding // inferred from electronic annotation /// 3978 // UDP-glucose 4-epimerase activity // inferred from sequence similarity	9225 // nucleotide-sugar metabolism // inferred from electronic annotation	---	---
1884	143083_at	0.660352	2.01846	8.02905	4.12e-09	4.98e-08	10.4553	FBgn0000163	CG5055	baz	bazooka	32703	5080 // protein kinase C binding // inferred from sequence or structural similarity /// 5198 // structural molecule activity // inferred from electronic annotation /// 5515 // protein binding // inferred from sequence or structural similarity /// 5515 // protein binding // inferred from electronic annotation /// 5080 // protein kinase C binding // inferred from sequence similarity /// 5515 // pro…	910 // cytokinesis // inferred from mutant phenotype /// 1738 // morphogenesis of a polarized epithelium // traceable author statement /// 2009 // morphogenesis of an epithelium // non-traceable author statement /// 2009 // morphogenesis of an epithelium // traceable author statement /// 6605 // protein targeting // inferred from electronic annotation /// 7043 // intercellular junction assembly /…	5737 // cytoplasm // non-traceable author statement /// 5913 // cell-cell adherens junction // non-traceable author statement /// 5938 // cell cortex // traceable author statement /// 16324 // apical plasma membrane // non-traceable author statement /// 16324 // apical plasma membrane // traceable author statement /// 16327 // apicolateral plasma membrane // traceable author statement /// 35003 /…	IPR001478 // PDZ/DHR/GLGF domain // 2.4E-12 /// IPR001478 // PDZ/DHR/GLGF domain // 4.8E-17 /// IPR001478 // PDZ/DHR/GLGF domain // 1.7E-12
5940	147139_at	0.659436	3.19209	7.47247	1.85e-08	1.93e-07	8.93806	FBgn0033821	CG10799	CG10799	CG10799	36472	---	---	---	---
8464	149663_at	0.659201	1.54076	7.45931	1.92e-08	1.99e-07	8.90178	FBgn0040256	CG6633	Ugt86Dd	Ugt86Dd	53507	15020 // glucuronosyltransferase activity // inferred from sequence or structural similarity /// 16740 // transferase activity // inferred from electronic annotation /// 16757 // transferase activity, transferring glycosyl groups // inferred from electronic annotation /// 16758 // transferase activity, transferring hexosyl groups // inferred from electronic annotation /// 15020 // glucuronosyltra…	5976 // polysaccharide metabolism // inferred from electronic annotation /// 6952 // defense response // inferred from electronic annotation /// 8202 // steroid metabolism // inferred from electronic annotation /// 9636 // response to toxin // inferred from electronic annotation /// 8152 // metabolism // inferred from electronic annotation	---	IPR002213 // UDP-glucoronosyl/UDP-glucosyl transferase // 1.7E-74 /// IPR002213 // UDP-glucoronosyl/UDP-glucosyl transferase // 1.7E-74
10562	151761_at	0.658422	2.42372	7.47567	1.84e-08	1.92e-07	8.9469	FBgn0040305	CG3743	MTF-1	MTF-1	39089	3700 // transcription factor activity // non-traceable author statement /// 3704 // specific RNA polymerase II transcription factor activity // non-traceable author statement /// 8270 // zinc ion binding // inferred from electronic annotation /// 3676 // nucleic acid binding // inferred from electronic annotation /// 46872 // metal ion binding // inferred from electronic annotation	6350 // transcription // non-traceable author statement /// 6357 // regulation of transcription from RNA polymerase II promoter // inferred from electronic annotation /// 6875 // metal ion homeostasis // inferred from mutant phenotype /// 8283 // cell proliferation // inferred from electronic annotation	5634 // nucleus // non-traceable author statement /// 5654 // nucleoplasm // inferred from electronic annotation /// 5634 // nucleus // inferred from electronic annotation	IPR007087 // Zn-finger, C2H2 type // 1.7E-5 /// IPR007087 // Zn-finger, C2H2 type // 1.5E-5 /// IPR007087 // Zn-finger, C2H2 type // 4.5E-6 /// IPR007087 // Zn-finger, C2H2 type // 8.8E-7 /// IPR007087 // Zn-finger, C2H2 type // 1.0E-6 /// IPR007087 // Zn-finger, C2H2 type // 2.1E-5 /// IPR007087 // Zn-finger, C2H2 type // 1.0E-6 /// IPR007087 // Zn-finger, C2H2 type // 2.1E-5
1806	143005_at	0.658401	1.30038	4.32145	0.000144897	0.000615902	-0.00971718	FBgn0025628	CG4199	CG4199	CG4199	31174	15036 // disulfide oxidoreductase activity // inferred from electronic annotation /// 16491 // oxidoreductase activity // inferred from electronic annotation	6118 // electron transport // inferred from electronic annotation /// 6124 // ferredoxin metabolism // inferred from electronic annotation /// 6800 // oxygen and reactive oxygen species metabolism // inferred from electronic annotation /// 6952 // defense response // inferred from electronic annotation	---	IPR005806 // Rieske [2Fe-2S] domain // 3.3E-19 /// IPR001327 // FAD-dependent pyridine nucleotide-disulphide oxidoreductase // 1.8E-71 /// IPR005806 // Rieske [2Fe-2S] domain // 3.3E-19 /// IPR001327 // FAD-dependent pyridine nucleotide-disulphide oxidoreductase // 1.8E-71 /// IPR005806 // Rieske [2Fe-2S] domain // 3.3E-19 /// IPR001327 // FAD-dependent pyridine nucleotide-disulphide oxidoreducta…
6026	147225_at	0.657529	1.68894	6.17509	7.03e-07	5.32e-06	5.28452	FBgn0033978	CG10242	Cyp6a23	Cyp6a23	36661	4497 // monooxygenase activity // inferred from electronic annotation /// 16491 // oxidoreductase activity // inferred from electronic annotation /// 5506 // iron ion binding // inferred from electronic annotation /// 20037 // heme binding // inferred from electronic annotation /// 46872 // metal ion binding // inferred from electronic annotation	6118 // electron transport // inferred from electronic annotation /// 8202 // steroid metabolism // inferred from electronic annotation	5792 // microsome // non-traceable author statement /// 16020 // membrane // non-traceable author statement /// 16020 // membrane // inferred from electronic annotation	IPR001128 // Cytochrome P450 // 1.0E-114
10941	152140_at	0.657519	1.1118	6.21313	6.31e-07	4.81e-06	5.39338	FBgn0032935	CG8678	CG8678	CG8678	35396	---	---	5635 // nuclear envelope // inferred from electronic annotation	---
3591	144790_at	0.657304	0.576906	9.73764	5.18e-11	9.87e-10	14.8742	FBgn0030189	CG2909	CG2909	CG2909	31958	5515 // protein binding // inferred from physical interaction	---	---	---
2188	143387_at	0.65657	1.41638	7.11873	4.92e-08	4.66e-07	7.95635	FBgn0003867	CG6705	tsl	torso-like	42564	5122 // torso binding // non-traceable author statement	7362 // terminal region determination // inferred from mutant phenotype /// 8293 // torso signaling pathway // traceable author statement /// 8595 // determination of anterior/posterior axis, embryo // traceable author statement /// 9880 // embryonic pattern specification // inferred from expression pattern /// 9880 // embryonic pattern specification // inferred from mutant phenotype /// 7275 // …	5576 // extracellular region // inferred from direct assay	---
13841	155040_at	0.656032	1.95732	8.84478	4.86e-10	7.27e-09	12.6118	FBgn0028546	CG9031	Rsu-1	Ras suppressor-1	34774	4675 // transmembrane receptor protein serine/threonine kinase activity // inferred from electronic annotation /// 5083 // small GTPase regulator activity // inferred from sequence or structural similarity /// 19207 // kinase regulator activity // inferred from electronic annotation /// 5083 // small GTPase regulator activity // inferred from sequence similarity	165 // MAPKKK cascade // inferred from electronic annotation /// 6468 // protein amino acid phosphorylation // inferred from electronic annotation /// 6952 // defense response // inferred from electronic annotation /// 7178 // transmembrane receptor protein serine/threonine kinase signaling pathway // inferred from electronic annotation	---	IPR001611 // Leucine-rich repeat // 0.0091 /// IPR001611 // Leucine-rich repeat // 6.6E-6 /// IPR001611 // Leucine-rich repeat // 0.012 /// IPR001611 // Leucine-rich repeat // 0.018 /// IPR001611 // Leucine-rich repeat // 0.015 /// IPR001611 // Leucine-rich repeat // 0.1 /// IPR001611 // Leucine-rich repeat // 0.0021
9765	150964_at	0.655383	1.23327	5.19346	1.19e-05	6.75e-05	2.46389	FBgn0040206	CG1487	krz	kurtz	53554	5515 // protein binding // inferred from physical interaction	6886 // intracellular protein transport // inferred from electronic annotation /// 6897 // endocytosis // inferred from electronic annotation /// 7165 // signal transduction // inferred from electronic annotation /// 7166 // cell surface receptor linked signal transduction // inferred from electronic annotation /// 7186 // G-protein coupled receptor protein signaling pathway // inferred from elec…	---	IPR000698 // Arrestin // 2.3E-66 /// IPR000698 // Arrestin // 2.2E-53
1155	142354_at	0.654959	1.45588	5.62387	3.42e-06	2.2e-05	3.70146	FBgn0053056	CG33056	CG33056	CG33056	326246	5515 // protein binding // inferred from physical interaction	---	---	---
10915	152114_at	0.654853	1.57623	8.45406	1.34e-09	1.8e-08	11.5893	FBgn0051445	CG31445	CG31445	CG31445	326140	4179 // membrane alanyl aminopeptidase activity // inferred from sequence or structural similarity /// 8270 // zinc ion binding // inferred from electronic annotation /// 4179 // membrane alanyl aminopeptidase activity // inferred from electronic annotation /// 4179 // membrane alanyl aminopeptidase activity // inferred from sequence similarity	6508 // proteolysis // inferred from sequence or structural similarity /// 6508 // proteolysis // inferred from electronic annotation /// 6508 // proteolysis // inferred from sequence similarity	16021 // integral to membrane // inferred from sequence or structural similarity /// 16021 // integral to membrane // inferred from sequence similarity	IPR001930 // Peptidase M1, membrane alanine aminopeptidase // 1.0E-126
237	141436_at	0.654684	1.59688	6.66712	1.74e-07	1.47e-06	6.68596	FBgn0038250	CG3505	CG3505	CG3505	41777	4252 // serine-type endopeptidase activity // non-traceable author statement /// 4263 // chymotrypsin activity // inferred from electronic annotation /// 4295 // trypsin activity // inferred from electronic annotation /// 4252 // serine-type endopeptidase activity // inferred from electronic annotation	6508 // proteolysis // inferred from electronic annotation	---	IPR001254 // Peptidase S1, chymotrypsin // 1.5E-51
11902	153101_at	0.654663	1.19407	8.05707	3.82e-09	4.66e-08	10.5308	FBgn0034648	CG15675	CG15675	CG15675	37469	---	---	---	---
7137	148336_at	0.654137	0.848248	7.78945	7.83e-09	8.88e-08	9.80649	FBgn0035785	CG8546	CG8546	CG8546	38835	15280 // amiloride-sensitive sodium channel activity // inferred from sequence or structural similarity /// 15280 // amiloride-sensitive sodium channel activity // inferred from sequence similarity	6812 // cation transport // inferred from electronic annotation /// 6814 // sodium ion transport // inferred from electronic annotation	16020 // membrane // inferred from electronic annotation	IPR001873 // Na+ channel, amiloride-sensitive // 7.2E-19 /// IPR001873 // Na+ channel, amiloride-sensitive // 1.8E-64
2603	143802_at	0.653321	0.981795	8.49266	1.21e-09	1.65e-08	11.6912	FBgn0015351	CG14906	CG14906	CG14906	42030	8168 // methyltransferase activity // inferred from electronic annotation	6139 // nucleobase, nucleoside, nucleotide and nucleic acid metabolism // inferred from electronic annotation	5634 // nucleus // inferred from electronic annotation	IPR007757 // MT-A70 // 9.4E-92
1479	142678_at	0.652643	1.63457	11.1935	1.68e-12	5.07e-11	18.3393	FBgn0001104	CG10060	G-i65A	G protein i subunit 65A	38765	3924 // GTPase activity // inferred from sequence or structural similarity /// 3924 // GTPase activity // non-traceable author statement /// 4871 // signal transducer activity // inferred from electronic annotation /// 5515 // protein binding // non-traceable author statement /// 5525 // GTP binding // inferred from electronic annotation /// 166 // nucleotide binding // inferred from electronic a…	7186 // G-protein coupled receptor protein signaling pathway // inferred from sequence or structural similarity /// 7186 // G-protein coupled receptor protein signaling pathway // non-traceable author statement /// 40001 // establishment of mitotic spindle localization // traceable author statement /// 45034 // neuroblast division // inferred from mutant phenotype /// 7165 // signal transduction …	5834 // heterotrimeric G-protein complex // inferred from sequence or structural similarity /// 5834 // heterotrimeric G-protein complex // non-traceable author statement /// 5938 // cell cortex // traceable author statement /// 5834 // heterotrimeric G-protein complex // inferred from sequence similarity	IPR001019 // Guanine nucleotide binding protein (G-protein), alpha subunit // 1.0E-126
10984	152183_at	0.652369	0.5216	7.79604	7.7e-09	8.73e-08	9.82443	FBgn0036627	CG4680	CG4680	CG4680	39824	---	---	---	---
453	141652_at	0.652253	1.16612	5.31278	8.4e-06	4.94e-05	2.80662	FBgn0036772	CG5290	CG5290	CG5290	39998	---	---	---	---
3683	144882_at	0.652126	0.747973	7.13287	4.73e-08	4.5e-07	7.99582	FBgn0030310	CG11709	PGRP-SA	Peptidoglycan recognition protein SA	32099	8329 // pattern recognition receptor activity // traceable author statement /// 8745 // N-acetylmuramoyl-L-alanine amidase activity // inferred from electronic annotation /// 16019 // peptidoglycan receptor activity // inferred from sequence or structural similarity /// 16019 // peptidoglycan receptor activity // non-traceable author statement /// 16019 // peptidoglycan receptor activity // trace…	6952 // defense response // non-traceable author statement /// 6955 // immune response // inferred from sequence or structural similarity /// 6955 // immune response // traceable author statement /// 6965 // anti-Gram-positive bacterial polypeptide induction // inferred from mutant phenotype /// 6965 // anti-Gram-positive bacterial polypeptide induction // traceable author statement /// 8063 // T…	5576 // extracellular region // inferred from direct assay /// 5576 // extracellular region // inferred from sequence or structural similarity /// 5887 // integral to plasma membrane // non-traceable author statement /// 5576 // extracellular region // inferred from sequence similarity	IPR002502 // N-acetylmuramoyl-L-alanine amidase, family 2 // 1.1E-64
13211	154410_at	0.651876	2.63121	9.32739	1.43e-10	2.43e-09	13.8477	FBgn0035147	CG12030	CG12030	CG12030	38076	3978 // UDP-glucose 4-epimerase activity // inferred from sequence or structural similarity /// 3978 // UDP-glucose 4-epimerase activity // non-traceable author statement /// 5515 // protein binding // inferred from physical interaction /// 42802 // identical protein binding // inferred from physical interaction /// 3824 // catalytic activity // inferred from electronic annotation /// 3978 // UDP…	6012 // galactose metabolism // non-traceable author statement /// 9225 // nucleotide-sugar metabolism // inferred from electronic annotation /// 5975 // carbohydrate metabolism // inferred from electronic annotation /// 6012 // galactose metabolism // inferred from electronic annotation	---	IPR001509 // NAD-dependent epimerase/dehydratase // 1.0E-126 /// IPR001509 // NAD-dependent epimerase/dehydratase // 3.0E-125
1027	142226_at	0.651398	5.10507	5.82833	1.9e-06	1.3e-05	4.28956	FBgn0000416	CG12070	Sap-r	Saposin-related	43662	---	6629 // lipid metabolism // inferred from electronic annotation /// 6665 // sphingolipid metabolism // inferred from electronic annotation /// 6810 // transport // inferred from electronic annotation /// 6869 // lipid transport // inferred from electronic annotation	5764 // lysosome // inferred from electronic annotation	IPR007856 // Saposin-like type B, 1 // 3.4E-9 /// IPR007856 // Saposin-like type B, 1 // 1.4E-12 /// IPR007856 // Saposin-like type B, 1 // 3.7E-14 /// IPR007856 // Saposin-like type B, 1 // 9.4E-16 /// IPR007856 // Saposin-like type B, 1 // 4.5E-12 /// IPR007856 // Saposin-like type B, 1 // 4.3E-13 /// IPR008138 // Saposin-like type B, 2 // 7.7E-13 /// IPR008138 // Saposin-like type B, 2 // 8.7E…
8221	149420_at	0.650525	2.55364	8.99077	3.35e-10	5.21e-09	12.9889	FBgn0037468	CG1943	CG1943	CG1943	40844	5515 // protein binding // inferred from physical interaction	---	---	---
12904	154103_at	0.650437	3.4992	8.54667	1.05e-09	1.45e-08	11.8334	FBgn0036299	CG10620	Tsf2	Transferrin 2	39435	5381 // iron ion transporter activity // inferred from sequence or structural similarity /// 5386 // carrier activity // inferred from electronic annotation /// 5488 // binding // inferred from electronic annotation /// 8199 // ferric iron binding // inferred from electronic annotation /// 5381 // iron ion transporter activity // inferred from sequence similarity	6812 // cation transport // inferred from electronic annotation /// 6826 // iron ion transport // inferred from electronic annotation /// 6879 // iron ion homeostasis // inferred from electronic annotation	5576 // extracellular region // inferred from sequence or structural similarity /// 5576 // extracellular region // inferred from electronic annotation /// 5576 // extracellular region // inferred from sequence similarity	IPR001156 // Peptidase S60, transferrin lactoferrin // 6.9E-51 /// IPR001156 // Peptidase S60, transferrin lactoferrin // 8.1E-74
5569	146768_at	0.650103	0.640538	8.44742	1.36e-09	1.82e-08	11.5718	FBgn0033222	CG12824	CG12824	CG12824	35727	---	---	---	---
2476	143675_at	0.648882	1.19304	8.02038	4.21e-09	5.08e-08	10.432	FBgn0011674	CG11312	insc	inscuteable	37355	5515 // protein binding // inferred from physical interaction /// 8093 // cytoskeletal adaptor activity // inferred from mutant phenotype /// 8093 // cytoskeletal adaptor activity // inferred from sequence or structural similarity /// 8093 // cytoskeletal adaptor activity // non-traceable author statement /// 5488 // binding // inferred from electronic annotation /// 8093 // cytoskeletal adaptor …	6403 // RNA localization // inferred from mutant phenotype /// 7010 // cytoskeleton organization and biogenesis // non-traceable author statement /// 7400 // neuroblast fate determination // traceable author statement /// 7422 // peripheral nervous system development // inferred from mutant phenotype /// 7423 // sensory organ development // traceable author statement /// 7525 // somatic muscle de…	5737 // cytoplasm // inferred from direct assay /// 5938 // cell cortex // inferred from direct assay /// 45177 // apical part of cell // non-traceable author statement /// 45179 // apical cortex // inferred from direct assay /// 45179 // apical cortex // traceable author statement	---
11602	152801_at	0.648727	4.52015	4.59335	6.67e-05	0.000313871	0.753099	FBgn0001125	CG4233	Got2	Glutamate oxaloacetate transaminase 2	33373	4069 // aspartate transaminase activity // inferred from direct assay /// 4069 // aspartate transaminase activity // inferred from sequence or structural similarity /// 4069 // aspartate transaminase activity // non-traceable author statement /// 3824 // catalytic activity // inferred from electronic annotation /// 8483 // transaminase activity // inferred from electronic annotation /// 16769 // …	6531 // aspartate metabolism // inferred from sequence or structural similarity /// 6537 // glutamate biosynthesis // inferred from mutant phenotype /// 6537 // glutamate biosynthesis // traceable author statement /// 7416 // synaptogenesis // inferred from mutant phenotype /// 45213 // neurotransmitter receptor metabolism // inferred from mutant phenotype /// 6520 // amino acid metabolism // inf…	5739 // mitochondrion // inferred from sequence or structural similarity /// 5759 // mitochondrial matrix // inferred from sequence or structural similarity /// 5739 // mitochondrion // inferred from sequence similarity /// 5759 // mitochondrial matrix // inferred from sequence similarity	IPR004839 // Aminotransferase, class I and II // 2.4E-95 /// IPR004839 // Aminotransferase, class I and II // 2.4E-95
2080	143279_at	0.648447	1.52857	11.3831	1.1e-12	3.45e-11	18.7705	FBgn0011774	CG5247	Irbp	Inverted repeat-binding protein	117419	3677 // DNA binding // inferred from direct assay /// 3677 // DNA binding // inferred from sequence or structural similarity /// 3677 // DNA binding // non-traceable author statement /// 4003 // ATP-dependent DNA helicase activity // non-traceable author statement /// 4677 // DNA-dependent protein kinase activity // inferred from direct assay /// 4677 // DNA-dependent protein kinase activity // i…	723 // telomere maintenance // inferred from mutant phenotype /// 6260 // DNA replication // inferred from electronic annotation /// 6303 // double-strand break repair via nonhomologous end joining // inferred from electronic annotation /// 6310 // DNA recombination // inferred from electronic annotation	5634 // nucleus // non-traceable author statement /// 5634 // nucleus // inferred from electronic annotation /// 5958 // DNA-dependent protein kinase complex // inferred from electronic annotation	IPR006164 // Ku // 3.4E-75 /// IPR005161 // Ku70/Ku80 N-terminal alpha/beta domain // 3.9E-72 /// IPR005160 // Ku70/Ku80 C-terminal arm // 4.8E-24
2754	143953_at	0.64833	1.00795	8.82437	5.12e-10	7.61e-09	12.5589	FBgn0022213	CG13281	Cas	CAS/CSE1 segregation protein	35016	8262 // importin-alpha export receptor activity // non-traceable author statement /// 8565 // protein transporter activity // inferred from electronic annotation /// 5515 // protein binding // inferred from physical interaction /// 5488 // binding // inferred from electronic annotation /// 8262 // importin-alpha export receptor activity // inferred from electronic annotation	59 // protein import into nucleus, docking // inferred from electronic annotation /// 6606 // protein import into nucleus // non-traceable author statement /// 6611 // protein export from nucleus // inferred from mutant phenotype /// 6611 // protein export from nucleus // non-traceable author statement /// 6915 // apoptosis // inferred from sequence or structural similarity /// 6917 // induction …	5634 // nucleus // non-traceable author statement /// 5643 // nuclear pore // inferred from electronic annotation /// 5737 // cytoplasm // non-traceable author statement /// 5634 // nucleus // inferred from electronic annotation /// 5737 // cytoplasm // inferred from electronic annotation	IPR005043 // CAS/CSE, C-terminal // 1.0E-126 /// IPR001494 // Importin-beta, N-terminal // 3.9E-20
11599	152798_at	0.648135	1.47104	9.09448	2.57e-10	4.12e-09	13.2551	FBgn0036806	CG4120	Cyp12c1	Cyp12c1	40037	4497 // monooxygenase activity // inferred from electronic annotation /// 16491 // oxidoreductase activity // inferred from electronic annotation /// 5506 // iron ion binding // inferred from electronic annotation /// 20037 // heme binding // inferred from electronic annotation /// 46872 // metal ion binding // inferred from electronic annotation	6118 // electron transport // inferred from electronic annotation	5739 // mitochondrion // inferred from sequence or structural similarity /// 5739 // mitochondrion // non-traceable author statement /// 5739 // mitochondrion // inferred from electronic annotation /// 16020 // membrane // inferred from electronic annotation /// 5739 // mitochondrion // inferred from sequence similarity	IPR001128 // Cytochrome P450 // 9.5E-74
8267	149466_at	0.648119	0.655107	7.1682	4.29e-08	4.13e-07	8.09438	FBgn0037531	CG10445	CG10445	CG10445	40938	3676 // nucleic acid binding // inferred from electronic annotation /// 3677 // DNA binding // inferred from electronic annotation /// 3678 // DNA helicase activity // inferred from electronic annotation /// 3717 // RNA polymerase II transcription termination factor activity // inferred from sequence or structural similarity /// 5524 // ATP binding // inferred from electronic annotation /// 4386 …	381 // regulation of alternative nuclear mRNA splicing, via spliceosome // inferred from mutant phenotype /// 6357 // regulation of transcription from RNA polymerase II promoter // inferred from electronic annotation	5634 // nucleus // Unknown /// 5634 // nucleus // inferred from curator	IPR000330 // SNF2 related domain // 7.4E-47 /// IPR000330 // SNF2 related domain // 3.5E-5 /// IPR001650 // Helicase, C-terminal // 8.8E-20
2864	144063_at	0.648043	2.93489	9.54787	8.27e-11	1.49e-09	14.4021	FBgn0025456	CG5413	CREG	Cellular Repressor of E1A-stimulated Genes	42092	5515 // protein binding // inferred from physical interaction /// 16564 // transcriptional repressor activity // inferred from sequence or structural similarity /// 16564 // transcriptional repressor activity // inferred from sequence similarity	16481 // negative regulation of transcription // inferred from sequence or structural similarity /// 16481 // negative regulation of transcription // inferred from sequence similarity	5634 // nucleus // Unknown /// 5634 // nucleus // inferred from curator	---
9729	150928_at	0.646697	0.860456	9.30114	1.53e-10	2.58e-09	13.7812	FBgn0051006	CG31006	CG31006	CG31006	43683	---	7242 // intracellular signaling cascade // inferred from electronic annotation	---	---
3112	144311_at	0.64662	1.83424	7.7215	9.41e-09	1.05e-07	9.62129	FBgn0041713	CG4182	yellow-c	yellow-c	34879	5515 // protein binding // inferred from physical interaction	---	---	IPR003534 // Major royal jelly protein // 1.0E-126
4077	145276_at	0.645003	1.9771	10.1898	1.74e-11	3.78e-10	15.9799	FBgn0030894	CG7192	CG7192	CG7192	32791	---	---	---	---
162	141361_at	0.643243	2.99711	6.986	7.11e-08	6.51e-07	7.58483	FBgn0039637	CG11880	CG11880	CG11880	43440	5215 // transporter activity // inferred from electronic annotation	6810 // transport // inferred from electronic annotation	---	IPR007603 // Protein of unknown function DUF580 // 1.0E-126
11549	152748_at	0.642648	3.64767	3.24721	0.00276946	0.0078053	-2.86984	FBgn0030157	CG1468	CG1468	CG1468	31920	---	---	---	---
4465	145664_at	0.638594	3.48481	4.63084	5.99e-05	0.000284681	0.85904	FBgn0031453	CG9894	CG9894	CG9894	33462	---	---	5634 // nucleus // inferred from direct assay	---
4937	146136_at	0.638418	1.5833	7.39784	2.28e-08	2.33e-07	8.73201	FBgn0032209	CG18144	Hand	Hand	34379	3700 // transcription factor activity // inferred from sequence or structural similarity /// 3700 // transcription factor activity // inferred from sequence similarity	1525 // angiogenesis // inferred from electronic annotation /// 6357 // regulation of transcription from RNA polymerase II promoter // inferred from electronic annotation /// 7498 // mesoderm development // inferred from electronic annotation /// 7507 // heart development // inferred from electronic annotation /// 45449 // regulation of transcription // inferred from sequence or structural simila…	5634 // nucleus // Unknown /// 5634 // nucleus // inferred from curator	IPR001092 // Basic helix-loop-helix dimerization domain bHLH // 8.4E-19
2640	143839_at	0.637745	1.8039	7.02575	6.37e-08	5.9e-07	7.69626	FBgn0015765	CG5475	Mpk2	Mpk2	42866	4674 // protein serine/threonine kinase activity // non-traceable author statement /// 4707 // MAP kinase activity // inferred from direct assay /// 4707 // MAP kinase activity // inferred from genetic interaction /// 4707 // MAP kinase activity // inferred from sequence or structural similarity /// 4707 // MAP kinase activity // non-traceable author statement /// 5524 // ATP binding // inferred …	165 // MAPKKK cascade // inferred from direct assay /// 165 // MAPKKK cascade // inferred from sequence or structural similarity /// 165 // MAPKKK cascade // non-traceable author statement /// 6468 // protein amino acid phosphorylation // non-traceable author statement /// 6950 // response to stress // inferred from direct assay /// 6950 // response to stress // inferred from mutant phenotype ///…	5634 // nucleus // non-traceable author statement /// 5634 // nucleus // inferred from electronic annotation	IPR000719 // Protein kinase // 3.3E-87 /// IPR000719 // Protein kinase // 9.4E-85
10879	152078_at	0.636709	1.54682	11.5655	7.31e-13	2.43e-11	19.181	FBgn0031824	CG9547	CG9547	CG9547	33911	4361 // glutaryl-CoA dehydrogenase activity // inferred from sequence or structural similarity /// 5515 // protein binding // inferred from physical interaction /// 3995 // acyl-CoA dehydrogenase activity // inferred from electronic annotation /// 16491 // oxidoreductase activity // inferred from electronic annotation /// 4361 // glutaryl-CoA dehydrogenase activity // inferred from sequence simil…	6118 // electron transport // inferred from electronic annotation /// 6554 // lysine catabolism // inferred from sequence or structural similarity /// 6568 // tryptophan metabolism // inferred from sequence or structural similarity /// 6637 // acyl-CoA metabolism // inferred from electronic annotation /// 46948 // hydroxylysine catabolism // inferred from sequence or structural similarity /// 655…	5759 // mitochondrial matrix // inferred from sequence or structural similarity /// 5759 // mitochondrial matrix // inferred from sequence similarity	IPR006091 // Acyl-CoA dehydrogenase, central domain // 2.6E-16 /// IPR006092 // Acyl-CoA dehydrogenase, N-terminal // 2.1E-13 /// IPR006090 // Acyl-CoA dehydrogenase, C-terminal // 5.8E-42
13541	154740_at	0.634761	1.46924	12.0123	2.75e-13	1.04e-11	20.1692	FBgn0051793	CG31793	CG31793	CG31793	326161	166 // nucleotide binding // inferred from electronic annotation /// 5215 // transporter activity // inferred from sequence or structural similarity /// 5524 // ATP binding // inferred from electronic annotation /// 42626 // ATPase activity, coupled to transmembrane movement of substances // inferred from sequence or structural similarity /// 16887 // ATPase activity // inferred from electronic a…	6810 // transport // inferred from sequence or structural similarity /// 6858 // extracellular transport // inferred from electronic annotation /// 6952 // defense response // inferred from electronic annotation /// 9636 // response to toxin // inferred from electronic annotation /// 6810 // transport // inferred from electronic annotation /// 6810 // transport // inferred from sequence similarity	16021 // integral to membrane // inferred from electronic annotation /// 43190 // ATP-binding cassette (ABC) transporter complex // inferred from sequence or structural similarity /// 16020 // membrane // inferred from electronic annotation /// 43190 // ATP-binding cassette (ABC) transporter complex // inferred from sequence similarity	IPR001140 // ABC transporter, transmembrane region // 6.1E-20 /// IPR001140 // ABC transporter, transmembrane region // 3.3E-21 /// IPR003439 // ABC transporter // 1.7E-49 /// IPR003439 // ABC transporter // 5.5E-45
10901	152100_at	0.634647	3.88674	4.02377	0.000335304	0.0012821	-0.83095	FBgn0028490	CG31705	CG31705	CG31705	34577	---	---	---	---
11427	152626_at	0.634368	0.345864	3.86042	0.000528341	0.00189035	-1.27379	FBgn0037396	CG11459	CG11459	CG11459	40741	4217 // cathepsin L activity // non-traceable author statement /// 8234 // cysteine-type peptidase activity // inferred from electronic annotation	6508 // proteolysis // inferred from electronic annotation	---	IPR000668 // Peptidase C1A, papain // 7.0E-77
12669	153868_at	0.634279	2.29637	10.1296	2e-11	4.25e-10	15.8343	FBgn0031268	CG2813	CG2813	CG2813	33237	5515 // protein binding // inferred from physical interaction	---	---	---
1927	143126_at	0.633546	1.89772	6.44109	3.3e-07	2.65e-06	6.04405	FBgn0000472	CG10798	dm	diminutive	31310	3677 // DNA binding // inferred from direct assay /// 3700 // transcription factor activity // inferred from direct assay /// 3700 // transcription factor activity // inferred from sequence or structural similarity /// 5515 // protein binding // inferred from physical interaction /// 3677 // DNA binding // inferred from electronic annotation /// 30528 // transcription regulator activity // inferr…	74 // regulation of progression through cell cycle // traceable author statement /// 6355 // regulation of transcription, DNA-dependent // inferred from direct assay /// 8283 // cell proliferation // inferred from expression pattern /// 8361 // regulation of cell size // traceable author statement /// 9792 // embryonic development (sensu Metazoa) // inferred from expression pattern /// 9993 // oo…	5634 // nucleus // inferred from sequence or structural similarity /// 5634 // nucleus // inferred from electronic annotation /// 5634 // nucleus // inferred from sequence similarity	IPR001092 // Basic helix-loop-helix dimerization domain bHLH // 3.7E-13
10651	151850_at	0.631304	3.35795	5.50561	4.82e-06	3.01e-05	3.36118	FBgn0029876	---	CG3960	CG3960	31591	3779 // actin binding // inferred from sequence or structural similarity /// 5200 // structural constituent of cytoskeleton // inferred from sequence or structural similarity /// 3779 // actin binding // inferred from sequence similarity /// 5200 // structural constituent of cytoskeleton // inferred from sequence similarity	7498 // mesoderm development // non-traceable author statement	5856 // cytoskeleton // inferred from sequence or structural similarity /// 5856 // cytoskeleton // inferred from sequence similarity	IPR001715 // Calponin-like actin-binding // 3.1E-35 /// IPR001715 // Calponin-like actin-binding // 3.1E-35
12783	153982_at	0.630749	0.959613	6.77621	1.28e-07	1.11e-06	6.99442	FBgn0015019	CG8977	Cct	Cct	42029	5524 // ATP binding // inferred from electronic annotation /// 42623 // ATPase activity, coupled // inferred from sequence or structural similarity /// 42623 // ATPase activity, coupled // non-traceable author statement /// 51082 // unfolded protein binding // inferred from sequence or structural similarity /// 166 // nucleotide binding // inferred from electronic annotation /// 5515 // protein b…	6457 // protein folding // inferred from sequence or structural similarity /// 6457 // protein folding // non-traceable author statement /// 6457 // protein folding // inferred from electronic annotation /// 44267 // cellular protein metabolism // inferred from electronic annotation /// 6457 // protein folding // inferred from sequence similarity	5737 // cytoplasm // non-traceable author statement /// 5832 // chaperonin-containing T-complex // inferred from sequence or structural similarity /// 5832 // chaperonin-containing T-complex // inferred from sequence similarity	IPR002423 // Chaperonin Cpn60/TCP-1 // 1.0E-126
8425	149624_at	0.63053	0.360592	9.75079	5.02e-11	9.59e-10	14.9068	FBgn0037801	CG3999	CG3999	CG3999	41253	4375 // glycine dehydrogenase (decarboxylating) activity // inferred from sequence or structural similarity /// 5515 // protein binding // inferred from physical interaction /// 4375 // glycine dehydrogenase (decarboxylating) activity // inferred from electronic annotation /// 16829 // lyase activity // inferred from electronic annotation /// 4375 // glycine dehydrogenase (decarboxylating) activi…	6544 // glycine metabolism // inferred from electronic annotation /// 9063 // amino acid catabolism // inferred from electronic annotation /// 6520 // amino acid metabolism // inferred from electronic annotation	5961 // glycine dehydrogenase complex (decarboxylating) // inferred from sequence or structural similarity /// 5961 // glycine dehydrogenase complex (decarboxylating) // inferred from electronic annotation /// 5961 // glycine dehydrogenase complex (decarboxylating) // inferred from sequence similarity	IPR003437 // Glycine cleavage system P-protein // 1.0E-126
12025	153224_at	0.627772	2.40967	9.4378	1.09e-10	1.91e-09	14.1261	FBgn0033128	CG12142	Tsp42Eg	Tetraspanin 42Eg	35616	---	---	16021 // integral to membrane // inferred from sequence or structural similarity /// 16021 // integral to membrane // inferred from electronic annotation /// 16021 // integral to membrane // inferred from sequence similarity	IPR000301 // CD9/CD37/CD63 antigen // 2.1E-45
11758	152957_at	0.626952	2.4403	4.38052	0.000122511	0.000532705	0.15512	FBgn0052103	CG32103	CG32103	CG32103	39415	5386 // carrier activity // inferred from sequence or structural similarity /// 5488 // binding // inferred from electronic annotation /// 5509 // calcium ion binding // inferred from electronic annotation /// 5386 // carrier activity // inferred from sequence similarity	6810 // transport // inferred from sequence or structural similarity /// 6812 // cation transport // inferred from electronic annotation /// 6810 // transport // inferred from electronic annotation /// 6810 // transport // inferred from sequence similarity	5740 // mitochondrial envelope // inferred from sequence or structural similarity /// 5743 // mitochondrial inner membrane // inferred from electronic annotation /// 5778 // peroxisomal membrane // inferred from sequence or structural similarity /// 16020 // membrane // inferred from electronic annotation /// 16021 // integral to membrane // inferred from electronic annotation /// 5740 // mitocho…	IPR001993 // Mitochondrial substrate carrier // 4.5E-31 /// IPR001993 // Mitochondrial substrate carrier // 1.9E-35 /// IPR001993 // Mitochondrial substrate carrier // 2.2E-24 /// IPR001993 // Mitochondrial substrate carrier // 4.5E-31 /// IPR001993 // Mitochondrial substrate carrier // 1.9E-35 /// IPR001993 // Mitochondrial substrate carrier // 2.2E-24 /// IPR002048 // Calcium-binding EF-hand //…
2077	143276_at	0.626891	6.46096	5.7821	2.17e-06	1.47e-05	4.15665	FBgn0002868	CG9470	MtnA	Metallothionein A	41202	46872 // metal ion binding // non-traceable author statement /// 5507 // copper ion binding // inferred from electronic annotation /// 8270 // zinc ion binding // inferred from electronic annotation /// 46870 // cadmium ion binding // inferred from electronic annotation /// 46872 // metal ion binding // inferred from electronic annotation	---	---	IPR000966 // Diptera metallothionein, family 5 // 1.6E-20
11780	152979_at	0.626322	2.33138	8.55145	1.04e-09	1.44e-08	11.846	FBgn0051531	CG31531	CG31531	CG31531	40583	---	---	---	---
13269	154468_at	0.626319	1.52279	6.03729	1.04e-06	7.63e-06	4.88966	FBgn0037551	CG7891	CG7891	CG7891	40961	5525 // GTP binding // inferred from sequence or structural similarity /// 5525 // GTP binding // inferred from electronic annotation /// 5525 // GTP binding // inferred from sequence similarity	6886 // intracellular protein transport // inferred from electronic annotation /// 7186 // G-protein coupled receptor protein signaling pathway // inferred from electronic annotation /// 7264 // small GTPase mediated signal transduction // inferred from electronic annotation /// 17157 // regulation of exocytosis // inferred from electronic annotation /// 6364 // rRNA processing // inferred from e…	5622 // intracellular // inferred from electronic annotation	IPR006689 // ARF/SAR superfamily // 1.8E-40
2216	143415_at	0.626119	2.06935	4.50431	8.61e-05	0.000391858	0.502183	FBgn0004028	CG7178	wupA	wings up A	32794	3779 // actin binding // non-traceable author statement /// 5200 // structural constituent of cytoskeleton // inferred from electronic annotation /// 5523 // tropomyosin binding // non-traceable author statement /// 5515 // protein binding // inferred from physical interaction /// 3779 // actin binding // inferred from electronic annotation	6936 // muscle contraction // inferred from electronic annotation /// 7399 // nervous system development // non-traceable author statement /// 7517 // muscle development // non-traceable author statement /// 30239 // myofibril assembly // inferred from mutant phenotype /// 45214 // sarcomere organization // inferred from mutant phenotype /// 7399 // nervous system development // inferred from mut…	5861 // troponin complex // non-traceable author statement	IPR001978 // Troponin // 1.6E-48 /// IPR001978 // Troponin // 1.6E-45 /// IPR001978 // Troponin // 5.0E-44 /// IPR001978 // Troponin // 9.0E-43 /// IPR001978 // Troponin // 1.6E-48
5747	146946_s_at	0.625299	3.77399	4.88283	2.91e-05	0.000149716	1.57486	FBgn0033521 /// FBgn0033520 /// FBgn0033518	CG11765 /// CG12405 /// CG12896	CG12896 /// Prx2540-1 /// Prx2540-2	CG12896 /// Peroxiredoxin 2540 /// Peroxiredoxin 2540	246663 /// 36098 /// 36101	4601 // peroxidase activity // inferred from sequence or structural similarity /// 4601 // peroxidase activity // non-traceable author statement /// 4602 // glutathione peroxidase activity // inferred from sequence or structural similarity /// 16209 // antioxidant activity // inferred from sequence or structural similarity /// 16209 // antioxidant activity // non-traceable author statement /// 46…	6800 // oxygen and reactive oxygen species metabolism // inferred from electronic annotation /// 6952 // defense response // inferred from electronic annotation /// 7498 // mesoderm development // inferred from expression pattern	---	IPR000866 // Alkyl hydroperoxide reductase/ Thiol specific antioxidant/ Mal allergen // 5.7E-50 /// IPR000866 // Alkyl hydroperoxide reductase/ Thiol specific antioxidant/ Mal allergen // 5.4E-50
1332	142531_at	0.625188	2.57666	6.29296	5.02e-07	3.9e-06	5.62158	FBgn0004926	CG4153	eIF-2	Eukaryotic initiation factor 2	39433	49 // tRNA binding // non-traceable author statement /// 3743 // translation initiation factor activity // inferred from sequence or structural similarity /// 3743 // translation initiation factor activity // non-traceable author statement /// 5525 // GTP binding // non-traceable author statement /// 5515 // protein binding // inferred from physical interaction /// 3743 // translation initiation …	1677 // formation of translation initiation ternary complex // non-traceable author statement /// 6413 // translational initiation // inferred from sequence or structural similarity /// 6445 // regulation of translation // inferred from electronic annotation /// 6412 // protein biosynthesis // inferred from electronic annotation /// 6413 // translational initiation // inferred from electronic ann…	5829 // cytosol // inferred from sequence or structural similarity /// 5850 // eukaryotic translation initiation factor 2 complex // inferred from sequence or structural similarity /// 5850 // eukaryotic translation initiation factor 2 complex // non-traceable author statement /// 5829 // cytosol // inferred from sequence similarity /// 5850 // eukaryotic translation initiation factor 2 complex /…	IPR002735 // Translation initiation factor IF5 // 2.7E-74
2184	143383_at	0.623025	2.26745	5.15615	1.32e-05	7.44e-05	2.35683	FBgn0003861	CG7875	trp	transient receptor potential	43542	5218 // intracellular ligand-gated calcium channel activity // non-traceable author statement /// 5262 // calcium channel activity // inferred from sequence or structural similarity /// 5516 // calmodulin binding // traceable author statement /// 8086 // light-activated voltage-gated calcium channel activity // non-traceable author statement /// 15279 // store-operated calcium channel activity //…	6816 // calcium ion transport // inferred from sequence or structural similarity /// 7602 // phototransduction // non-traceable author statement /// 8377 // light-induced release of internally sequestered calcium ion // inferred from direct assay /// 9416 // response to light stimulus // inferred from mutant phenotype /// 9416 // response to light stimulus // traceable author statement /// 19722 …	5887 // integral to plasma membrane // non-traceable author statement /// 8087 // light-activated voltage-gated calcium channel complex // non-traceable author statement /// 16027 // inaD signaling complex // traceable author statement /// 16028 // rhabdomere // inferred from direct assay /// 16028 // rhabdomere // non-traceable author statement /// 16028 // rhabdomere // traceable author stateme…	IPR005821 // Ion transport protein // 3.5E-27 /// IPR002110 // Ankyrin // 24.0 /// IPR002110 // Ankyrin // 7.9E-6
2100	143299_at	0.622993	5.8616	4.17386	0.000219968	0.000887858	-0.418949	FBgn0003067	CG17725	Pepck	Phosphoenolpyruvate carboxykinase	37131	4613 // phosphoenolpyruvate carboxykinase (GTP) activity // inferred from sequence or structural similarity /// 5525 // GTP binding // inferred from electronic annotation /// 166 // nucleotide binding // inferred from electronic annotation /// 4611 // phosphoenolpyruvate carboxykinase activity // inferred from electronic annotation /// 4613 // phosphoenolpyruvate carboxykinase (GTP) activity // i…	6094 // gluconeogenesis // inferred from sequence or structural similarity /// 6094 // gluconeogenesis // non-traceable author statement /// 6094 // gluconeogenesis // inferred from electronic annotation /// 6094 // gluconeogenesis // inferred from sequence similarity	5739 // mitochondrion // inferred from sequence or structural similarity /// 5739 // mitochondrion // inferred from sequence similarity	IPR008209 // Phosphoenolpyruvate carboxykinase (GTP) // 1.0E-126 /// IPR008209 // Phosphoenolpyruvate carboxykinase (GTP) // 1.0E-126
322	141521_at	0.622835	2.2694	7.96912	4.83e-09	5.71e-08	10.2937	FBgn0051864 /// FBgn0032391	CG5202 /// CG31864	CG31864 /// escl	CG31864 /// escl	318990 /// 34611	5515 // protein binding // non-traceable author statement /// 30528 // transcription regulator activity // inferred from electronic annotation	6139 // nucleobase, nucleoside, nucleotide and nucleic acid metabolism // inferred from electronic annotation /// 6357 // regulation of transcription from RNA polymerase II promoter // inferred from electronic annotation /// 6366 // transcription from RNA polymerase II promoter // inferred from electronic annotation /// 7165 // signal transduction // inferred from electronic annotation /// 7166 /…	5700 // polytene chromosome // non-traceable author statement	IPR001680 // G-protein beta WD-40 repeat // 0.18 /// IPR001680 // G-protein beta WD-40 repeat // 1.1 /// IPR001680 // G-protein beta WD-40 repeat // 2.9E-10 /// IPR001680 // G-protein beta WD-40 repeat // 4.2E-5 /// IPR001680 // G-protein beta WD-40 repeat // 0.39 /// IPR001680 // G-protein beta WD-40 repeat // 0.0021
245	141444_at	0.62215	1.85719	5.01704	1.97e-05	0.000106588	1.95828	FBgn0030357	CG2471	CG2471	CG2471	32156	---	---	---	IPR001611 // Leucine-rich repeat // 6.9E-4 /// IPR001611 // Leucine-rich repeat // 0.094
12902	154101_at	0.621323	1.40675	6.85702	1.02e-07	9.04e-07	7.22228	FBgn0032728	CG18398	CG18398	CG18398	35155	5515 // protein binding // inferred from physical interaction /// 5488 // binding // inferred from electronic annotation	---	---	---
11559	152758_at	0.621215	1.93268	4.95564	2.36e-05	0.000124686	1.78273	FBgn0037709	CG8199	CG8199	CG8199	41149	3863 // 3-methyl-2-oxobutanoate dehydrogenase (2-methylpropanoyl-transferring) activity // inferred from sequence or structural similarity /// 16624 // oxidoreductase activity, acting on the aldehyde or oxo group of donors, disulfide as acceptor // inferred from electronic annotation /// 3863 // 3-methyl-2-oxobutanoate dehydrogenase (2-methylpropanoyl-transferring) activity // inferred from seque…	9063 // amino acid catabolism // inferred from electronic annotation /// 46949 // acyl-CoA biosynthesis // inferred from sequence or structural similarity /// 8152 // metabolism // inferred from electronic annotation /// 46949 // acyl-CoA biosynthesis // inferred from sequence similarity	17086 // 3-methyl-2-oxobutanoate dehydrogenase (lipoamide) complex // inferred from sequence or structural similarity /// 17086 // 3-methyl-2-oxobutanoate dehydrogenase (lipoamide) complex // inferred from sequence similarity	IPR001017 // Dehydrogenase, E1 component // 1.1E-113
2026	143225_at	0.621169	1.19115	5.52987	4.49e-06	2.82e-05	3.43099	FBgn0002183	CG1828	dre4	dre4	38248	3677 // DNA binding // inferred from sequence or structural similarity /// 3712 // transcription cofactor activity // inferred from electronic annotation /// 8235 // metalloexopeptidase activity // inferred from electronic annotation /// 16787 // hydrolase activity // inferred from electronic annotation /// 3677 // DNA binding // inferred from sequence similarity	1672 // regulation of chromatin assembly or disassembly // inferred from mutant phenotype /// 6268 // DNA unwinding during replication // inferred from sequence or structural similarity /// 6357 // regulation of transcription from RNA polymerase II promoter // inferred from electronic annotation /// 6508 // proteolysis // inferred from electronic annotation /// 6268 // DNA unwinding during replic…	35101 // FACT complex // traceable author statement	---
10824	152023_at	0.619765	0.640739	8.84179	4.9e-10	7.3e-09	12.6041	FBgn0041181	CG7068	TepIII	Thiolester containing protein III	34045	4866 // endopeptidase inhibitor activity // inferred from sequence or structural similarity /// 4866 // endopeptidase inhibitor activity // inferred from electronic annotation /// 4866 // endopeptidase inhibitor activity // inferred from sequence similarity	---	---	IPR001599 // Alpha-2-macroglobulin // 2.4E-4 /// IPR001599 // Alpha-2-macroglobulin // 1.1E-74 /// IPR002890 // Alpha-2-macroglobulin, N-terminal // 2.1E-19
4532	145731_at	0.619074	5.57256	4.762	4.11e-05	0.000203365	1.23089	FBgn0031561	CG16712	CG16712	CG16712	33592	4867 // serine-type endopeptidase inhibitor activity // inferred from sequence or structural similarity /// 4867 // serine-type endopeptidase inhibitor activity // inferred from electronic annotation /// 4867 // serine-type endopeptidase inhibitor activity // inferred from sequence similarity	---	---	IPR002223 // Pancreatic trypsin inhibitor (Kunitz) // 6.8E-23
1387	142586_at	0.617681	2.17413	5.64217	3.25e-06	2.1e-05	3.75412	FBgn0038981	CG5346	CG5346	CG5346	42653	5506 // iron ion binding // inferred from electronic annotation /// 16491 // oxidoreductase activity // inferred from electronic annotation	---	---	IPR005123 // 2OG-Fe(II) oxygenase superfamily // 1.0E-18
13741	154940_at	0.615818	1.1357	7.32963	2.74e-08	2.75e-07	8.54319	FBgn0036487	CG6876	CG6876	CG6876	39655	31202 // RNA splicing factor activity, transesterification mechanism // inferred from sequence or structural similarity /// 31202 // RNA splicing factor activity, transesterification mechanism // inferred from sequence similarity	398 // nuclear mRNA splicing, via spliceosome // inferred from sequence or structural similarity /// 398 // nuclear mRNA splicing, via spliceosome // inferred from sequence similarity	5681 // spliceosome complex // inferred from sequence or structural similarity /// 5681 // spliceosome complex // inferred from sequence similarity	IPR002687 // Pre-mRNA processing ribonucleoprotein, binding region // 1.8E-58
1741	142940_at	0.613967	0.372521	8.64559	8.13e-10	1.14e-08	12.093	FBgn0037850	CG14695	CG14695	CG14695	41314	---	---	---	---
13133	154332_at	0.613775	2.80586	7.68741	1.03e-08	1.14e-07	9.52815	FBgn0039541	CG12876	CG12876	CG12876	43330	4871 // signal transducer activity // inferred from sequence or structural similarity /// 5057 // receptor signaling protein activity // inferred from electronic annotation /// 5515 // protein binding // inferred from physical interaction /// 4871 // signal transducer activity // inferred from sequence similarity	6917 // induction of apoptosis // inferred from electronic annotation /// 7165 // signal transduction // inferred from electronic annotation	---	IPR004328 // BRO1 // 6.1E-84
12097	153296_at	0.611788	3.27628	3.33695	0.00218611	0.00638071	-2.64396	FBgn0025885	CG11143	Inos	Inos	35671	4512 // inositol-3-phosphate synthase activity // inferred from direct assay /// 4512 // inositol-3-phosphate synthase activity // inferred from sequence or structural similarity /// 4512 // inositol-3-phosphate synthase activity // non-traceable author statement /// 16849 // phosphorus-oxygen lyase activity // inferred from electronic annotation /// 4512 // inositol-3-phosphate synthase activity…	6021 // myo-inositol biosynthesis // inferred from sequence or structural similarity /// 6644 // phospholipid metabolism // inferred from electronic annotation /// 8654 // phospholipid biosynthesis // inferred from electronic annotation /// 6021 // myo-inositol biosynthesis // inferred from electronic annotation /// 6021 // myo-inositol biosynthesis // inferred from sequence similarity	5737 // cytoplasm // inferred from sequence or structural similarity /// 5737 // cytoplasm // inferred from sequence similarity	IPR002587 // Myo-inositol-1-phosphate synthase // 1.0E-126
11384	152583_at	0.611453	1.32776	4.28381	0.000161213	0.000678437	-0.114427	FBgn0019650	CG11186	toy	twin of eyeless	43833	3677 // DNA binding // inferred from electronic annotation /// 3700 // transcription factor activity // inferred from electronic annotation /// 3704 // specific RNA polymerase II transcription factor activity // non-traceable author statement /// 43565 // sequence-specific DNA binding // inferred from electronic annotation	6357 // regulation of transcription from RNA polymerase II promoter // inferred from electronic annotation /// 7398 // ectoderm development // inferred from electronic annotation /// 7399 // nervous system development // inferred from electronic annotation /// 7456 // eye development (sensu Endopterygota) // traceable author statement /// 7492 // endoderm development // inferred from electronic a…	5634 // nucleus // non-traceable author statement /// 5634 // nucleus // inferred from electronic annotation	IPR001523 // Paired box protein, N-terminal // 4.1E-82 /// IPR001356 // Homeobox // 2.0E-31
13926	155125_at	0.611188	2.30676	8.13432	3.11e-09	3.86e-08	10.7383	FBgn0038533	CG7523	CG7523	CG7523	42125	---	---	---	---
2464	143663_at	0.611084	3.08674	4.88055	2.92e-05	0.000150428	1.56838	FBgn0011584	CG4758	Trp1	Translocation protein 1	34333	8565 // protein transporter activity // inferred from electronic annotation	6614 // SRP-dependent cotranslational protein targeting to membrane // inferred from sequence or structural similarity /// 15031 // protein transport // inferred from electronic annotation /// 6614 // SRP-dependent cotranslational protein targeting to membrane // inferred from sequence similarity	5784 // translocon complex // inferred from sequence or structural similarity /// 5784 // translocon complex // non-traceable author statement /// 16021 // integral to membrane // inferred from electronic annotation /// 5784 // translocon complex // inferred from sequence similarity	IPR004728 // Translocation protein Sec62 // 1.0E-126 /// IPR004728 // Translocation protein Sec62 // 1.0E-126
940	142139_at	0.60961	2.89332	4.13445	0.000245795	0.000979126	-0.527575	FBgn0040349	CG3699	CG3699	CG3699	31046	16614 // oxidoreductase activity, acting on CH-OH group of donors // inferred from sequence or structural similarity /// 16491 // oxidoreductase activity // inferred from electronic annotation /// 16614 // oxidoreductase activity, acting on CH-OH group of donors // inferred from sequence similarity	8152 // metabolism // inferred from electronic annotation	---	IPR002198 // Short-chain dehydrogenase/reductase SDR // 4.1E-83
10369	151568_at	0.608562	1.8833	7.60855	1.28e-08	1.39e-07	9.31226	FBgn0031850	CG11326	Tsp	Thrombospondin	33941	5198 // structural molecule activity // inferred from electronic annotation /// 5509 // calcium ion binding // inferred from electronic annotation /// 5515 // protein binding // inferred from physical interaction	7155 // cell adhesion // inferred from electronic annotation /// 7155 // cell adhesion // inferred from sequence or structural similarity /// 7155 // cell adhesion // inferred from sequence similarity	5578 // extracellular matrix (sensu Metazoa) // inferred from sequence or structural similarity /// 16020 // membrane // inferred from electronic annotation /// 5576 // extracellular region // inferred from electronic annotation /// 5578 // extracellular matrix (sensu Metazoa) // inferred from sequence similarity	---
11457	152656_at	0.605288	3.90505	6.6115	2.03e-07	1.7e-06	6.52834	FBgn0020304	CG3365	drongo	drongo	33263	5215 // transporter activity // inferred from electronic annotation	6139 // nucleobase, nucleoside, nucleotide and nucleic acid metabolism // inferred from electronic annotation /// 6810 // transport // inferred from electronic annotation /// 15931 // nucleobase, nucleoside, nucleotide and nucleic acid transport // inferred from electronic annotation /// 43087 // regulation of GTPase activity // inferred from electronic annotation	---	IPR001164 // Human Rev interacting-like protein (hRIP) // 2.5E-28
12953	154152_at	0.602398	2.82596	5.75731	2.33e-06	1.56e-05	4.08535	FBgn0020240	CG7586	Mcr	Macroglobulin complement-related	44071	4866 // endopeptidase inhibitor activity // inferred from sequence or structural similarity /// 4867 // serine-type endopeptidase inhibitor activity // inferred from electronic annotation /// 5125 // cytokine activity // inferred from electronic annotation /// 5515 // protein binding // inferred from physical interaction /// 4866 // endopeptidase inhibitor activity // inferred from electronic ann…	6508 // proteolysis // inferred from electronic annotation /// 6952 // defense response // inferred from electronic annotation /// 7165 // signal transduction // inferred from electronic annotation /// 7267 // cell-cell signaling // inferred from electronic annotation	---	IPR002172 // Low density lipoprotein-receptor, class A // 5.7E-8 /// IPR001599 // Alpha-2-macroglobulin // 3.8E-50 /// IPR002890 // Alpha-2-macroglobulin, N-terminal // 7.0E-14 /// IPR002890 // Alpha-2-macroglobulin, N-terminal // 1.1E-14
2034	143233_at	0.60214	0.829547	5.12339	1.45e-05	8.1e-05	2.2629	FBgn0002533	CG8697	Lcp2	Larval cuticle protein 2	35818	8010 // structural constituent of larval cuticle (sensu Insecta) // non-traceable author statement	---	---	IPR000618 // Insect cuticle protein // 1.3E-23
492	141691_at	0.601834	1.15849	4.90321	2.74e-05	0.00014202	1.63301	FBgn0003495	CG6134	spz	spatzle	43256	5121 // Toll binding // inferred from genetic interaction /// 5121 // Toll binding // non-traceable author statement /// 5121 // Toll binding // traceable author statement /// 5125 // cytokine activity // traceable author statement /// 16015 // morphogen activity // non-traceable author statement /// 5515 // protein binding // inferred from physical interaction /// 5125 // cytokine activity // in…	578 // embryonic axis specification // non-traceable author statement /// 6952 // defense response // non-traceable author statement /// 6952 // defense response // traceable author statement /// 6955 // immune response // traceable author statement /// 6966 // antifungal humoral response (sensu Protostomia) // inferred from mutant phenotype /// 6967 // antifungal polypeptide induction // inferre…	5576 // extracellular region // inferred from direct assay /// 5576 // extracellular region // non-traceable author statement /// 5576 // extracellular region // traceable author statement /// 5615 // extracellular space // inferred from electronic annotation	---
12438	153637_at	0.601549	2.60564	7.53847	1.55e-08	1.65e-07	9.1198	FBgn0029134	CG12323	Pros5	Pros5	45269	4175 // endopeptidase activity // inferred from sequence or structural similarity /// 4175 // endopeptidase activity // non-traceable author statement /// 5515 // protein binding // inferred from physical interaction /// 4175 // endopeptidase activity // inferred from electronic annotation /// 4298 // threonine endopeptidase activity // inferred from electronic annotation /// 8233 // peptidase ac…	6508 // proteolysis // inferred from electronic annotation /// 6511 // ubiquitin-dependent protein catabolism // inferred from electronic annotation	5839 // proteasome core complex (sensu Eukaryota) // inferred from sequence or structural similarity /// 5829 // cytosol // inferred from electronic annotation /// 5839 // proteasome core complex (sensu Eukaryota) // inferred from electronic annotation /// 43234 // protein complex // inferred from electronic annotation /// 5839 // proteasome core complex (sensu Eukaryota) // inferred from sequenc…	IPR001353 // Peptidase T1, 20S proteasome // 7.8E-69
2995	144194_at	0.601164	3.23598	6.24117	5.82e-07	4.47e-06	5.47357	FBgn0027836	CG5729	Dgp-1	Dgp-1	37080	5525 // GTP binding // inferred from sequence or structural similarity /// 16818 // hydrolase activity, acting on acid anhydrides, in phosphorus-containing anhydrides // inferred from electronic annotation /// 5525 // GTP binding // inferred from electronic annotation /// 5525 // GTP binding // inferred from sequence similarity	6412 // protein biosynthesis // inferred from electronic annotation	---	IPR004161 // Elongation factor Tu, domain 2 // 1.2E-11 /// IPR000795 // Protein synthesis factor, GTP-binding // 6.1E-13 /// IPR004160 // Elongation factor Tu, C-terminal // 7.7E-20
11838	153037_at	0.60002	1.14095	7.08939	5.33e-08	5.03e-07	7.87436	FBgn0036279	CG4357	Ncc69	sodium chloride cotransporter 69	39410	5279 // amino acid-polyamine transporter activity // inferred from electronic annotation /// 8324 // cation transporter activity // inferred from electronic annotation /// 15378 // sodium:chloride symporter activity // inferred from sequence or structural similarity /// 5215 // transporter activity // inferred from electronic annotation /// 15377 // cation:chloride symporter activity // inferred …	6812 // cation transport // inferred from electronic annotation /// 6814 // sodium ion transport // inferred from electronic annotation /// 6821 // chloride transport // inferred from electronic annotation /// 6865 // amino acid transport // inferred from electronic annotation /// 6810 // transport // inferred from electronic annotation /// 6811 // ion transport // inferred from electronic annota…	16020 // membrane // inferred from electronic annotation /// 16021 // integral to membrane // inferred from electronic annotation	IPR004841 // Amino acid permease-associated region // 1.0E-126
2665	143864_at	0.599329	1.92763	5.30254	8.65e-06	5.06e-05	2.77719	FBgn0016036	CG14827	mei-P22	meiotic P22	38797	---	7131 // meiotic recombination // inferred from mutant phenotype /// 7131 // meiotic recombination // traceable author statement /// 42138 // meiotic DNA double-strand break formation // non-traceable author statement	---	---
9350	150549_at	0.597301	1.65405	9.36913	1.29e-10	2.21e-09	13.9531	FBgn0039268	CG11819	CG11819	CG11819	43002	---	---	---	IPR010439 // Protein of unknown function DUF1041 // 1.2E-73 /// IPR000008 // C2 domain // 5.0E-19
114	141313_at	0.597192	1.7049	8.25519	2.26e-09	2.89e-08	11.0614	FBgn0025618	CG12311	Pomt2	Protein O-mannosyltransferase 2	31024	30 // mannosyltransferase activity // non-traceable author statement /// 4169 // dolichyl-phosphate-mannose-protein mannosyltransferase activity // inferred from direct assay /// 4169 // dolichyl-phosphate-mannose-protein mannosyltransferase activity // inferred from sequence or structural similarity /// 5515 // protein binding // inferred from physical interaction /// 30 // mannosyltransferase a…	6486 // protein amino acid glycosylation // inferred from electronic annotation /// 35269 // protein amino acid O-linked mannosylation // inferred from direct assay /// 35269 // protein amino acid O-linked mannosylation // non-traceable author statement /// 30259 // lipid glycosylation // inferred from mutant phenotype /// 6493 // protein amino acid O-linked glycosylation // inferred from electro…	16020 // membrane // inferred from electronic annotation /// 16021 // integral to membrane // inferred from sequence or structural similarity /// 5789 // endoplasmic reticulum membrane // inferred from sequence or structural similarity /// 5783 // endoplasmic reticulum // inferred from electronic annotation /// 16021 // integral to membrane // inferred from electronic annotation /// 16021 // inte…	IPR003608 // MIR domain // 8.5E-18 /// IPR003608 // MIR domain // 2.6E-17 /// IPR003608 // MIR domain // 3.3E-15 /// IPR003342 // Glycosyl transferase, family 39 // 1.9E-74
4801	146000_at	0.596843	0.985769	5.67497	2.95e-06	1.93e-05	3.8485	FBgn0031973	CG7219	CG7219	CG7219	34091	4867 // serine-type endopeptidase inhibitor activity // inferred from sequence or structural similarity /// 4867 // serine-type endopeptidase inhibitor activity // inferred from sequence similarity	---	---	IPR000215 // Serpin // 4.2E-8 /// IPR000215 // Serpin // 6.5E-49 /// IPR000215 // Serpin // 2.9E-14
780	141979_r_at	0.59653	2.94599	3.73289	0.000750951	0.00255484	-1.61497	---	---	---	---	---	---	---	---	---
12485	153684_at	0.596395	2.86762	6.71893	1.5e-07	1.29e-06	6.83256	FBgn0000250	CG5848	cact	cactus	34969	5515 // protein binding // inferred from physical interaction /// 8134 // transcription factor binding // traceable author statement /// 30528 // transcription regulator activity // inferred from electronic annotation	6357 // regulation of transcription from RNA polymerase II promoter // inferred from electronic annotation /// 6916 // anti-apoptosis // inferred from electronic annotation /// 6952 // defense response // non-traceable author statement /// 6952 // defense response // traceable author statement /// 6955 // immune response // traceable author statement /// 6960 // antimicrobial humoral response (se…	5737 // cytoplasm // inferred from direct assay /// 5737 // cytoplasm // non-traceable author statement /// 5737 // cytoplasm // traceable author statement	IPR002110 // Ankyrin // 2.2E-9 /// IPR002110 // Ankyrin // 1.3E-6 /// IPR002110 // Ankyrin // 6.3E-4 /// IPR002110 // Ankyrin // 3.6E-8 /// IPR002110 // Ankyrin // 2.6E-5
9389	150588_at	0.596285	3.54098	3.51542	0.00135691	0.00424527	-2.1863	FBgn0039330	CG11909	CG11909	CG11909	43072	4558 // alpha-glucosidase activity // inferred from sequence or structural similarity /// 4553 // hydrolase activity, hydrolyzing O-glycosyl compounds // inferred from electronic annotation /// 4558 // alpha-glucosidase activity // inferred from sequence similarity	5976 // polysaccharide metabolism // inferred from electronic annotation /// 5996 // monosaccharide metabolism // inferred from electronic annotation /// 5975 // carbohydrate metabolism // inferred from electronic annotation	17177 // alpha-glucosidase II complex // inferred from sequence or structural similarity /// 17177 // alpha-glucosidase II complex // inferred from sequence similarity	IPR000322 // Glycoside hydrolase, family 31 // 3.7E-11
7259	148458_at	0.595943	2.085	6.80513	1.18e-07	1.03e-06	7.07602	FBgn0035977	CG4437	PGRP-LF	Peptidoglycan recognition protein LF	39064	5515 // protein binding // inferred from electronic annotation /// 8745 // N-acetylmuramoyl-L-alanine amidase activity // inferred from electronic annotation /// 42834 // peptidoglycan binding // non-traceable author statement	6952 // defense response // non-traceable author statement /// 9253 // peptidoglycan catabolism // inferred from electronic annotation /// 9253 // peptidoglycan catabolism // non-traceable author statement /// 45087 // innate immune response // non-traceable author statement /// 6955 // immune response // inferred from electronic annotation /// 45087 // innate immune response // inferred from ele…	5887 // integral to plasma membrane // non-traceable author statement /// 16020 // membrane // inferred from electronic annotation /// 16021 // integral to membrane // inferred from electronic annotation	IPR002502 // N-acetylmuramoyl-L-alanine amidase, family 2 // 1.7E-64
9888	151087_at	0.592785	0.307585	7.39524	2.29e-08	2.35e-07	8.72482	FBgn0040602	CG14545	CG14545	CG14545	50075	5515 // protein binding // inferred from physical interaction	---	---	---
5615	146814_at	0.592622	1.96618	3.80703	0.000612355	0.00215015	-1.41713	FBgn0033301	CG12780	CG12780	CG12780	35834	8368 // Gram-negative bacterial binding // inferred from sequence or structural similarity /// 15926 // glucosidase activity // inferred from electronic annotation /// 8368 // Gram-negative bacterial binding // inferred from sequence similarity	5976 // polysaccharide metabolism // inferred from electronic annotation /// 6952 // defense response // inferred from electronic annotation	---	---
10719	151918_s_at	0.592153	3.68098	7.46926	1.87e-08	1.94e-07	8.92922	FBgn0027594	CG2086	drpr	draper	38218	4872 // receptor activity // inferred from electronic annotation /// 5201 // extracellular matrix structural constituent // inferred from electronic annotation /// 5198 // structural molecule activity // inferred from electronic annotation	6909 // phagocytosis // inferred from mutant phenotype /// 6909 // phagocytosis // traceable author statement /// 7155 // cell adhesion // inferred from sequence or structural similarity /// 7165 // signal transduction // inferred from electronic annotation /// 7398 // ectoderm development // inferred from electronic annotation /// 7399 // nervous system development // inferred from electronic an…	31224 // intrinsic to membrane // non-traceable author statement	IPR006209 // EGF-like domain // 1.1E-4 /// IPR006209 // EGF-like domain // 7.8E-6 /// IPR006209 // EGF-like domain // 2.0E-4 /// IPR006209 // EGF-like domain // 1.9E-5 /// IPR006209 // EGF-like domain // 7.2E-6 /// IPR006209 // EGF-like domain // 2.1E-4 /// IPR006209 // EGF-like domain // 1.4E-5 /// IPR006209 // EGF-like domain // 2.2E-4 /// IPR006209 // EGF-like domain // 9.2E-5 /// IPR006209 //…
2175	143374_at	0.5915	1.29093	3.62363	0.00101223	0.00329952	-1.90376	FBgn0003676	CG5374	T-cp1	Tcp1-like	42649	5524 // ATP binding // non-traceable author statement /// 8553 // hydrogen-exporting ATPase activity, phosphorylative mechanism // non-traceable author statement /// 42623 // ATPase activity, coupled // inferred from electronic annotation /// 51082 // unfolded protein binding // inferred from sequence or structural similarity /// 166 // nucleotide binding // inferred from electronic annotation //…	6457 // protein folding // inferred from sequence or structural similarity /// 6457 // protein folding // non-traceable author statement /// 6457 // protein folding // inferred from electronic annotation /// 44267 // cellular protein metabolism // inferred from electronic annotation /// 6457 // protein folding // inferred from sequence similarity	5753 // proton-transporting ATP synthase complex (sensu Eukaryota) // non-traceable author statement /// 5832 // chaperonin-containing T-complex // inferred from sequence or structural similarity /// 5832 // chaperonin-containing T-complex // inferred from sequence similarity	IPR002423 // Chaperonin Cpn60/TCP-1 // 1.0E-126
10561	151760_at	0.590624	2.52839	5.45723	5.54e-06	3.4e-05	3.22198	FBgn0033913	CG8468	CG8468	CG8468	36577	15355 // monocarboxylate porter activity // non-traceable author statement	6812 // cation transport // inferred from electronic annotation	---	---
12367	153566_at	0.590477	1.99514	10.2245	1.6e-11	3.55e-10	16.0636	FBgn0034179	CG6805	CG6805	CG6805	36911	46030 // inositol trisphosphate phosphatase activity // non-traceable author statement /// 5515 // protein binding // inferred from physical interaction /// 4437 // inositol or phosphatidylinositol phosphatase activity // inferred from electronic annotation	6629 // lipid metabolism // inferred from electronic annotation /// 7010 // cytoskeleton organization and biogenesis // inferred from electronic annotation /// 16311 // dephosphorylation // non-traceable author statement /// 19722 // calcium-mediated signaling // inferred from electronic annotation	---	IPR005135 // Endonuclease/exonuclease/phosphatase // 1.9E-42
13122	154321_at	0.58997	5.58662	5.074	1.67e-05	9.21e-05	2.12135	FBgn0015222	CG2216	Fer1HCH	Ferritin 1 heavy chain homologue	46415	8198 // ferrous iron binding // inferred from direct assay /// 8198 // ferrous iron binding // inferred from sequence or structural similarity /// 8198 // ferrous iron binding // non-traceable author statement /// 8199 // ferric iron binding // inferred from electronic annotation /// 5515 // protein binding // inferred from physical interaction /// 5488 // binding // inferred from electronic anno…	6826 // iron ion transport // inferred from electronic annotation /// 6879 // iron ion homeostasis // inferred from direct assay /// 6879 // iron ion homeostasis // inferred from sequence or structural similarity /// 6879 // iron ion homeostasis // non-traceable author statement /// 6879 // iron ion homeostasis // inferred from electronic annotation /// 6879 // iron ion homeostasis // inferred fr…	8043 // ferritin complex // inferred from direct assay /// 8043 // ferritin complex // inferred from sequence or structural similarity /// 8043 // ferritin complex // non-traceable author statement /// 8043 // ferritin complex // inferred from sequence similarity	IPR008331 // Ferritin and Dps // 3.0E-47 /// IPR008331 // Ferritin and Dps // 3.1E-22
10828	152027_at	0.589963	2.16831	6.72121	1.49e-07	1.28e-06	6.83902	FBgn0035076	CG10142	Ance-5	Ance-5	37980	4246 // peptidyl-dipeptidase A activity // inferred from electronic annotation /// 8233 // peptidase activity // inferred from sequence or structural similarity /// 8241 // peptidyl-dipeptidase activity // non-traceable author statement /// 8233 // peptidase activity // inferred from sequence similarity	6508 // proteolysis // inferred from electronic annotation /// 9306 // protein secretion // inferred from electronic annotation	16020 // membrane // inferred from electronic annotation	IPR001548 // Peptidase M2, peptidyl-dipeptidase A // 2.8E-31
7582	148781_at	0.58979	1.57314	6.14572	7.65e-07	5.73e-06	5.20043	FBgn0036467	CG12310	CG12310	CG12310	39634	---	---	---	---
11085	152284_at	0.589711	2.82367	8.11301	3.29e-09	4.06e-08	10.6811	FBgn0034577	CG10540	CG10540	CG10540	37387	3779 // actin binding // inferred from electronic annotation /// 5200 // structural constituent of cytoskeleton // inferred from electronic annotation /// 5515 // protein binding // inferred from physical interaction	7015 // actin filament organization // inferred from mutant phenotype /// 7018 // microtubule-based movement // inferred from sequence or structural similarity /// 30036 // actin cytoskeleton organization and biogenesis // non-traceable author statement /// 51016 // barbed-end actin filament capping // inferred from sequence or structural similarity /// 51016 // barbed-end actin filament capping …	5869 // dynactin complex // inferred from sequence or structural similarity /// 5875 // microtubule associated complex // inferred from electronic annotation /// 8290 // F-actin capping protein complex // non-traceable author statement /// 8290 // F-actin capping protein complex // inferred from electronic annotation /// 5869 // dynactin complex // inferred from sequence similarity	IPR002189 // F-actin capping protein, alpha subunit // 1.0E-126
4429	145628_at	0.589567	0.729978	6.90238	8.98e-08	8.04e-07	7.34996	FBgn0031405	CG4267	CG4267	CG4267	33405	4620 // phospholipase activity // inferred from sequence or structural similarity /// 5515 // protein binding // inferred from physical interaction /// 3824 // catalytic activity // inferred from electronic annotation /// 8970 // phospholipase A1 activity // inferred from electronic annotation /// 4620 // phospholipase activity // inferred from sequence similarity	6629 // lipid metabolism // inferred from electronic annotation	---	IPR000734 // Lipase // 2.7E-28
13567	154766_at	0.589189	1.74926	9.91486	3.37e-11	6.67e-10	15.3108	FBgn0030026	CG10964	sni	sniffer	31761	4090 // carbonyl reductase (NADPH) activity // inferred from direct assay /// 16491 // oxidoreductase activity // inferred from electronic annotation	8152 // metabolism // inferred from electronic annotation	---	IPR002198 // Short-chain dehydrogenase/reductase SDR // 7.6E-21
452	141651_at	0.588142	1.07056	10.878	3.45e-12	9.38e-11	17.6118	FBgn0034641	CG10080	CG10080	CG10080	37462	5488 // binding // inferred from electronic annotation	---	---	---
2824	144023_at	0.587872	2.36085	4.4574	9.84e-05	0.00043941	0.370398	FBgn0024732	CG8357	Rep1	Rep1	36290	5515 // protein binding // inferred from electronic annotation /// 5515 // protein binding // inferred from physical interaction	6309 // DNA fragmentation during apoptosis // non-traceable author statement /// 6916 // anti-apoptosis // inferred from genetic interaction /// 42981 // regulation of apoptosis // inferred from sequence or structural similarity /// 6915 // apoptosis // inferred from electronic annotation /// 42981 // regulation of apoptosis // inferred from sequence similarity	5622 // intracellular // inferred from electronic annotation	IPR003508 // Caspase-activated nuclease CIDE-N // 1.9E-48
9179	150378_at	0.58691	1.02315	6.1092	8.49e-07	6.31e-06	5.09582	FBgn0053110	CG33110	CG33110	CG33110	42659	8415 // acyltransferase activity // inferred from electronic annotation	38 // very-long-chain fatty acid metabolism // inferred from sequence or structural similarity /// 6633 // fatty acid biosynthesis // inferred from sequence or structural similarity /// 38 // very-long-chain fatty acid metabolism // inferred from sequence similarity /// 6633 // fatty acid biosynthesis // inferred from sequence similarity	16021 // integral to membrane // inferred from electronic annotation	IPR002076 // GNS1/SUR4 membrane protein // 1.8E-17
12032	153231_at	0.586034	1.3682	4.70937	4.79e-05	0.000231973	1.08148	FBgn0033234	CG8791	CG8791	CG8791	35745	5316 // high affinity inorganic phosphate:sodium symporter activity // inferred from sequence or structural similarity /// 5215 // transporter activity // inferred from electronic annotation /// 5316 // high affinity inorganic phosphate:sodium symporter activity // inferred from sequence similarity	6796 // phosphate metabolism // inferred from electronic annotation /// 6812 // cation transport // inferred from electronic annotation /// 6817 // phosphate transport // inferred from electronic annotation /// 6858 // extracellular transport // inferred from electronic annotation /// 6810 // transport // inferred from electronic annotation	16021 // integral to membrane // inferred from electronic annotation /// 16020 // membrane // inferred from electronic annotation	---
4966	146165_at	0.585956	2.14382	5.25767	9.85e-06	5.68e-05	2.64828	FBgn0032264	CG6113	CG6113	CG6113	34450	4806 // triacylglycerol lipase activity // inferred from sequence or structural similarity /// 3824 // catalytic activity // inferred from electronic annotation /// 16787 // hydrolase activity // inferred from electronic annotation /// 16789 // carboxylic ester hydrolase activity // inferred from electronic annotation /// 4806 // triacylglycerol lipase activity // inferred from sequence similarity	6629 // lipid metabolism // inferred from electronic annotation /// 16042 // lipid catabolism // inferred from electronic annotation	---	IPR000073 // Alpha/beta hydrolase fold // 4.6E-18 /// IPR006693 // Ab-hydrolase associated lipase region // 2.0E-36
6820	148019_at	0.585457	1.58556	10.1321	1.99e-11	4.24e-10	15.8405	FBgn0035300	CG1139	CG1139	CG1139	38264	5279 // amino acid-polyamine transporter activity // inferred from electronic annotation /// 15171 // amino acid transporter activity // inferred from sequence or structural similarity /// 15171 // amino acid transporter activity // inferred from sequence similarity	6520 // amino acid metabolism // inferred from electronic annotation /// 6865 // amino acid transport // inferred from electronic annotation	16020 // membrane // inferred from electronic annotation	IPR002422 // Amino acid/polyamine transporter II // 5.2E-59
10859	152058_at	0.584835	3.69421	3.72379	0.000769934	0.00261055	-1.63915	FBgn0003261	CG10279	Rm62	Rm62	40739	3729 // mRNA binding // inferred from sequence or structural similarity /// 4004 // ATP-dependent RNA helicase activity // inferred from sequence or structural similarity /// 4004 // ATP-dependent RNA helicase activity // non-traceable author statement /// 5515 // protein binding // inferred from physical interaction /// 5524 // ATP binding // inferred from electronic annotation /// 8026 // ATP-d…	381 // regulation of alternative nuclear mRNA splicing, via spliceosome // inferred from mutant phenotype /// 16246 // RNA interference // inferred from mutant phenotype /// 6417 // regulation of protein biosynthesis // inferred from electronic annotation /// 6445 // regulation of translation // inferred from electronic annotation	5634 // nucleus // Unknown /// 5634 // nucleus // inferred from electronic annotation /// 5634 // nucleus // inferred from curator	IPR001650 // Helicase, C-terminal // 2.5E-36 /// IPR001410 // DEAD/DEAH box helicase // 9.0E-83 /// IPR001650 // Helicase, C-terminal // 2.5E-36 /// IPR001410 // DEAD/DEAH box helicase // 9.0E-83 /// IPR001650 // Helicase, C-terminal // 2.5E-36 /// IPR001410 // DEAD/DEAH box helicase // 9.0E-83
426	141625_at	0.584307	2.26225	4.7175	4.67e-05	0.000227408	1.10454	FBgn0003660	CG12210	Syb	Synaptobrevin	36080	5485 // v-SNARE activity // inferred from sequence or structural similarity /// 5485 // v-SNARE activity // non-traceable author statement /// 5485 // v-SNARE activity // inferred from sequence similarity	6886 // intracellular protein transport // inferred from electronic annotation /// 6887 // exocytosis // inferred from electronic annotation /// 7269 // neurotransmitter secretion // non-traceable author statement /// 16081 // synaptic vesicle docking during exocytosis // inferred from sequence or structural similarity /// 16192 // vesicle-mediated transport // inferred from sequence or structura…	5886 // plasma membrane // non-traceable author statement /// 8021 // synaptic vesicle // inferred from sequence or structural similarity /// 8021 // synaptic vesicle // non-traceable author statement /// 16020 // membrane // inferred from electronic annotation /// 16021 // integral to membrane // inferred from electronic annotation /// 19717 // synaptosome // inferred from electronic annotation …	IPR001388 // Synaptobrevin // 3.6E-39
42	141241_at	0.583613	1.46554	8.0371	4.03e-09	4.89e-08	10.477	FBgn0037632	CG8351	CG8351	CG8351	41054	4672 // protein kinase activity // inferred from electronic annotation /// 5524 // ATP binding // inferred from electronic annotation /// 42623 // ATPase activity, coupled // inferred from sequence or structural similarity /// 51082 // unfolded protein binding // inferred from electronic annotation /// 166 // nucleotide binding // inferred from electronic annotation /// 5515 // protein binding //…	6457 // protein folding // inferred from electronic annotation /// 6457 // protein folding // inferred from sequence or structural similarity /// 6468 // protein amino acid phosphorylation // inferred from electronic annotation /// 44267 // cellular protein metabolism // inferred from electronic annotation /// 6457 // protein folding // inferred from sequence similarity	5832 // chaperonin-containing T-complex // inferred from sequence or structural similarity /// 5832 // chaperonin-containing T-complex // inferred from sequence similarity	IPR002423 // Chaperonin Cpn60/TCP-1 // 1.0E-126
12656	153855_at	0.583508	1.63277	10.161	1.86e-11	4e-10	15.9104	FBgn0023214	CG15085	edl	ETS-domain lacking	37149	3677 // DNA binding // inferred from electronic annotation /// 5515 // protein binding // inferred from physical interaction /// 43565 // sequence-specific DNA binding // inferred from electronic annotation	6355 // regulation of transcription, DNA-dependent // inferred from physical interaction /// 7423 // sensory organ development // inferred from mutant phenotype /// 9880 // embryonic pattern specification // inferred from mutant phenotype /// 16481 // negative regulation of transcription // inferred from genetic interaction /// 42058 // regulation of epidermal growth factor receptor signaling pat…	5634 // nucleus // inferred from electronic annotation	IPR003118 // Sterile alpha motif (SAM)/Pointed domain // 2.3E-9
563	141762_at	0.582417	4.59807	8.52277	1.12e-09	1.54e-08	11.7705	FBgn0013770	CG6692	Cp1	Cysteine proteinase-1	36546	3676 // nucleic acid binding // inferred from electronic annotation /// 4217 // cathepsin L activity // inferred from sequence or structural similarity /// 4217 // cathepsin L activity // non-traceable author statement /// 5515 // protein binding // inferred from physical interaction /// 4197 // cysteine-type endopeptidase activity // inferred from electronic annotation /// 8233 // peptidase acti…	6355 // regulation of transcription, DNA-dependent // inferred from electronic annotation /// 6508 // proteolysis // inferred from electronic annotation /// 30163 // protein catabolism // non-traceable author statement /// 35071 // salivary gland cell autophagic cell death // inferred from expression pattern /// 48102 // autophagic cell death // inferred from expression pattern /// 7275 // develo…	5764 // lysosome // non-traceable author statement /// 5764 // lysosome // inferred from electronic annotation	IPR000668 // Peptidase C1A, papain // 1.0E-126 /// IPR000668 // Peptidase C1A, papain // 1.0E-126
10836	152035_at	0.581666	3.26625	8.98763	3.38e-10	5.24e-09	12.9808	FBgn0032704	CG10373	CG10373	CG10373	35128	5215 // transporter activity // inferred from electronic annotation /// 15171 // amino acid transporter activity // inferred from electronic annotation	6520 // amino acid metabolism // inferred from electronic annotation /// 6810 // transport // inferred from electronic annotation /// 6865 // amino acid transport // inferred from electronic annotation	---	IPR004895 // Prenylated rab acceptor PRA1 // 2.5E-58
6495	147694_at	0.581059	1.48246	9.1964	1.99e-10	3.27e-09	13.5153	FBgn0034756	CG4373	Cyp6d2	Cyp6d2	37594	4497 // monooxygenase activity // inferred from electronic annotation /// 16491 // oxidoreductase activity // inferred from electronic annotation /// 5506 // iron ion binding // inferred from electronic annotation /// 16712 // oxidoreductase activity, acting on paired donors, with incorporation or reduction of molecular oxygen, reduced flavin or flavoprotein as one donor, and incorporation of one…	6118 // electron transport // inferred from electronic annotation /// 8202 // steroid metabolism // inferred from electronic annotation	5792 // microsome // non-traceable author statement /// 16020 // membrane // non-traceable author statement /// 5783 // endoplasmic reticulum // inferred from electronic annotation /// 5792 // microsome // inferred from electronic annotation /// 16020 // membrane // inferred from electronic annotation	IPR001128 // Cytochrome P450 // 2.0E-74
10661	151860_at	0.579895	2.94105	10.408	1.03e-11	2.44e-10	16.5039	FBgn0003249	CG10888	Rh3	Rhodopsin 3	42398	4930 // G-protein coupled receptor activity // non-traceable author statement /// 8020 // G-protein coupled photoreceptor activity // inferred from direct assay /// 8020 // G-protein coupled photoreceptor activity // inferred from sequence or structural similarity /// 8020 // G-protein coupled photoreceptor activity // non-traceable author statement /// 8020 // G-protein coupled photoreceptor act…	7186 // G-protein coupled receptor protein signaling pathway // inferred from sequence or structural similarity /// 7601 // visual perception // inferred from electronic annotation /// 7602 // phototransduction // non-traceable author statement /// 7604 // phototransduction, UV // inferred from direct assay /// 7604 // phototransduction, UV // non-traceable author statement /// 7604 // phototrans…	16021 // integral to membrane // inferred from sequence or structural similarity /// 16021 // integral to membrane // non-traceable author statement /// 16020 // membrane // inferred from electronic annotation /// 16021 // integral to membrane // inferred from electronic annotation /// 16021 // integral to membrane // inferred from sequence similarity	IPR000276 // Rhodopsin-like GPCR superfamily // 5.0E-74
11893	153092_at	0.57925	4.20354	5.80162	2.05e-06	1.39e-05	4.21276	FBgn0035499	CG14996	Chd64	Chd64	38490	3779 // actin binding // inferred from sequence or structural similarity /// 5200 // structural constituent of cytoskeleton // inferred from electronic annotation /// 3779 // actin binding // inferred from sequence similarity	6936 // muscle contraction // inferred from electronic annotation /// 6939 // smooth muscle contraction // inferred from sequence or structural similarity /// 6939 // smooth muscle contraction // inferred from sequence similarity	5865 // striated muscle thin filament // inferred from sequence or structural similarity /// 5865 // striated muscle thin filament // inferred from sequence similarity	IPR001715 // Calponin-like actin-binding // 8.3E-27 /// IPR000557 // Calponin repeat // 3.6E-5
6040	147239_at	0.577958	1.1852	3.95664	0.000404413	0.00150327	-1.01367	FBgn0034005	CG16827	PS4	PS4	36693	4872 // receptor activity // inferred from sequence or structural similarity /// 50839 // cell adhesion molecule binding // inferred from sequence or structural similarity /// 4013 // adenosylhomocysteinase activity // inferred from electronic annotation /// 4872 // receptor activity // inferred from electronic annotation /// 5515 // protein binding // inferred from electronic annotation /// 4872…	7155 // cell adhesion // inferred from sequence or structural similarity /// 7157 // heterophilic cell adhesion // traceable author statement /// 7160 // cell-matrix adhesion // traceable author statement /// 6730 // one-carbon compound metabolism // inferred from electronic annotation /// 7155 // cell adhesion // inferred from electronic annotation /// 7229 // integrin-mediated signaling pathway…	8305 // integrin complex // inferred from sequence or structural similarity /// 8305 // integrin complex // non-traceable author statement /// 8305 // integrin complex // inferred from electronic annotation /// 16021 // integral to membrane // inferred from electronic annotation /// 8305 // integrin complex // inferred from sequence similarity	IPR000413 // Integrins alpha chain // 5.9E-9 /// IPR000413 // Integrins alpha chain // 1.3E-9 /// IPR000043 // S-adenosyl-L-homocysteine hydrolase // 5.1E-24
2590	143789_at	0.577445	1.60796	8.7511	6.19e-10	8.97e-09	12.3685	FBgn0015279	CG4141	Pi3K92E	Pi3K92E	42446	16303 // phosphatidylinositol 3-kinase activity // inferred from direct assay /// 16303 // phosphatidylinositol 3-kinase activity // inferred from sequence or structural similarity /// 16303 // phosphatidylinositol 3-kinase activity // non-traceable author statement /// 35004 // phosphoinositide 3-kinase activity // inferred from sequence or structural similarity /// 35005 // phosphatidylinositol…	6914 // autophagy // inferred from mutant phenotype /// 6952 // defense response // inferred from electronic annotation /// 7186 // G-protein coupled receptor protein signaling pathway // inferred from electronic annotation /// 8286 // insulin receptor signaling pathway // non-traceable author statement /// 8286 // insulin receptor signaling pathway // traceable author statement /// 8361 // regul…	35030 // phosphoinositide 3-kinase complex, class IA // inferred from physical interaction /// 35030 // phosphoinositide 3-kinase complex, class IA // non-traceable author statement /// 5942 // phosphoinositide 3-kinase complex // inferred from electronic annotation	IPR003113 // Phosphatidylinositol 3-kinase, p85-binding // 1.5E-45 /// IPR000403 // Phosphatidylinositol 3- and 4-kinase // 2.8E-94 /// IPR002420 // Phosphoinositide 3-kinase, C2 domain // 1.3E-47 /// IPR000341 // Phosphoinositide 3-kinase, ras-binding domain // 1.4E-48 /// IPR001263 // Phosphoinositide 3-kinase accessory domain PIK // 4.9E-59
12418	153617_at	0.577202	1.59923	7.1019	5.15e-08	4.87e-07	7.90931	FBgn0030699	CG8578	CG8578	CG8578	32540	3700 // transcription factor activity // inferred from electronic annotation /// 42802 // identical protein binding // inferred from physical interaction	6355 // regulation of transcription, DNA-dependent // inferred from electronic annotation	---	---
12475	153674_at	0.576408	3.48028	9.40813	1.17e-10	2.04e-09	14.0515	FBgn0017572	CG4083	Mo25	Mo25	39858	5488 // binding // inferred from electronic annotation	1700 // embryonic development (sensu Insecta) // inferred from mutant phenotype	---	IPR004892 // Mo25 // 1.0E-126
4434	145633_at	0.575898	0.750564	7.15777	4.41e-08	4.24e-07	8.06529	FBgn0031412	CG16995	CG16995	CG16995	33413	---	6952 // defense response // inferred from electronic annotation	5576 // extracellular region // inferred from electronic annotation	IPR001283 // Allergen V5/Tpx-1 related // 3.2E-38
13717	154916_at	0.575818	1.57993	9.5483	8.26e-11	1.49e-09	14.4032	FBgn0034431	CG7417	Tab2	Tab2	37216	3700 // transcription factor activity // non-traceable author statement /// 5515 // protein binding // inferred from physical interaction /// 8270 // zinc ion binding // inferred from electronic annotation	43123 // positive regulation of I-kappaB kinase/NF-kappaB cascade // non-traceable author statement /// 45449 // regulation of transcription // non-traceable author statement /// 46330 // positive regulation of JNK cascade // non-traceable author statement	5634 // nucleus // non-traceable author statement	IPR003892 // Ubiquitin system component Cue // 4.8E-10
12852	154051_at	0.575681	1.59513	7.04624	6.01e-08	5.6e-07	7.75364	FBgn0024909	CG2670	Taf7	TBP-associated factor 7	40934	3700 // transcription factor activity // non-traceable author statement /// 16251 // general RNA polymerase II transcription factor activity // inferred from sequence or structural similarity /// 5515 // protein binding // inferred from physical interaction /// 3700 // transcription factor activity // inferred from electronic annotation /// 16251 // general RNA polymerase II transcription factor …	6355 // regulation of transcription, DNA-dependent // non-traceable author statement /// 6357 // regulation of transcription from RNA polymerase II promoter // inferred from electronic annotation /// 6367 // transcription initiation from RNA polymerase II promoter // inferred from sequence or structural similarity /// 45449 // regulation of transcription // inferred from electronic annotation ///…	5634 // nucleus // non-traceable author statement /// 5669 // transcription factor TFIID complex // inferred from sequence or structural similarity /// 5634 // nucleus // inferred from electronic annotation /// 5669 // transcription factor TFIID complex // inferred from sequence similarity	IPR006751 // TAFII55 protein conserved region // 5.4E-99
12252	153451_at	0.575077	2.48989	8.89038	4.33e-10	6.58e-09	12.7299	FBgn0013762	CG8203	Cdk5	Cyclin-dependent kinase 5	36727	4674 // protein serine/threonine kinase activity // non-traceable author statement /// 4693 // cyclin-dependent protein kinase activity // inferred from sequence or structural similarity /// 4702 // receptor signaling protein serine/threonine kinase activity // inferred from electronic annotation /// 5524 // ATP binding // inferred from electronic annotation /// 30332 // cyclin binding // non-tra…	74 // regulation of progression through cell cycle // inferred from electronic annotation /// 6468 // protein amino acid phosphorylation // inferred from sequence or structural similarity /// 6468 // protein amino acid phosphorylation // non-traceable author statement /// 7049 // cell cycle // inferred from mutant phenotype /// 7067 // mitosis // inferred from electronic annotation /// 7269 // ne…	---	IPR000719 // Protein kinase // 2.4E-97
5936	147135_at	0.574694	1.80414	7.94644	5.14e-09	6.04e-08	10.2324	FBgn0033814	CG4670	CG4670	CG4670	36464	15926 // glucosidase activity // inferred from electronic annotation /// 16971 // flavin-linked sulfhydryl oxidase activity // inferred from sequence or structural similarity /// 16971 // flavin-linked sulfhydryl oxidase activity // inferred from sequence similarity	6118 // electron transport // inferred from electronic annotation /// 6464 // protein modification // inferred from electronic annotation	---	IPR006863 // Erv1/Alr // 2.6E-52 /// IPR006662 // Thioredoxin type domain // 3.5E-16
115	141314_at	0.574417	2.29734	4.95445	2.36e-05	0.000124974	1.77932	FBgn0020638	CG10530	Lcp65Ag1	Lcp65Ag1	38703	8010 // structural constituent of larval cuticle (sensu Insecta) // inferred from sequence or structural similarity /// 8010 // structural constituent of larval cuticle (sensu Insecta) // non-traceable author statement /// 5515 // protein binding // inferred from physical interaction /// 5198 // structural molecule activity // inferred from electronic annotation /// 42302 // structural constituen…	8363 // larval cuticle biosynthesis (sensu Insecta) // non-traceable author statement	5576 // extracellular region // non-traceable author statement	IPR000618 // Insect cuticle protein // 2.3E-31
66	141265_at	0.573751	1.65264	6.22469	6.1e-07	4.67e-06	5.42646	FBgn0040475	CG6757	SH3PX1	SH3PX1	39136	5515 // protein binding // inferred from physical interaction /// 5515 // protein binding // inferred from electronic annotation /// 35091 // phosphoinositide binding // inferred from electronic annotation	6886 // intracellular protein transport // inferred from sequence or structural similarity /// 7242 // intracellular signaling cascade // inferred from electronic annotation /// 6886 // intracellular protein transport // inferred from sequence similarity	---	IPR001452 // SH3 // 7.0E-17 /// IPR001683 // Phox-like // 3.9E-37
7471	148670_at	0.573518	1.38891	7.03741	6.16e-08	5.72e-07	7.72893	FBgn0052109	CG32109	CG32109	CG32109	39444	---	---	---	---
13814	155013_at	0.573154	2.01613	7.61595	1.25e-08	1.36e-07	9.33252	FBgn0032601	CG17914	yellow-b	yellow-b	35005	5515 // protein binding // inferred from physical interaction	---	---	IPR003534 // Major royal jelly protein // 1.0E-126
5519	146718_at	0.572989	1.36758	8.64998	8.04e-10	1.13e-08	12.1045	FBgn0033139	CG12837	Tsp42Er	Tetraspanin 42Er	35629	5057 // receptor signaling protein activity // inferred from electronic annotation	7398 // ectoderm development // inferred from electronic annotation /// 7399 // nervous system development // inferred from electronic annotation /// 19226 // transmission of nerve impulse // inferred from electronic annotation	16021 // integral to membrane // inferred from sequence or structural similarity /// 16021 // integral to membrane // inferred from sequence similarity	IPR000301 // CD9/CD37/CD63 antigen // 4.1E-46
10285	151484_i_at	0.57219	2.17428	4.30622	0.000151294	0.000640371	-0.0521191	FBgn0014396	CG3234	tim	timeless	---	5515 // protein binding // traceable author statement	7617 // mating behavior // inferred from mutant phenotype /// 7620 // copulation // inferred from mutant phenotype /// 45187 // regulation of circadian sleep/wake cycle, sleep // inferred from mutant phenotype /// 48512 // circadian behavior // inferred from mutant phenotype /// 48511 // rhythmic process // inferred from electronic annotation /// 7622 // rhythmic behavior // traceable author stat…	5634 // nucleus // inferred from electronic annotation /// 5634 // nucleus // traceable author statement /// 5737 // cytoplasm // traceable author statement /// 5634 // nucleus // non-traceable author statement /// 5737 // cytoplasm // non-traceable author statement	IPR006906 // Timeless protein // 1.0E-126
11359	152558_at	0.571911	1.46262	6.99499	6.93e-08	6.37e-07	7.61004	FBgn0034997	CG3376	CG3376	CG3376	37884	4767 // sphingomyelin phosphodiesterase activity // inferred from sequence or structural similarity /// 16787 // hydrolase activity // inferred from electronic annotation /// 4767 // sphingomyelin phosphodiesterase activity // inferred from electronic annotation /// 4767 // sphingomyelin phosphodiesterase activity // inferred from sequence similarity	6685 // sphingomyelin catabolism // inferred from electronic annotation	---	IPR004843 // Metallo-phosphoesterase // 4.7E-19
12563	153762_at	0.5717	1.15107	5.43463	5.91e-06	3.6e-05	3.15699	FBgn0003963	CG2762	ush	u-shaped	33225	3700 // transcription factor activity // non-traceable author statement /// 4879 // ligand-dependent nuclear receptor activity // non-traceable author statement /// 5515 // protein binding // inferred from physical interaction /// 8134 // transcription factor binding // inferred from mutant phenotype /// 8134 // transcription factor binding // traceable author statement /// 8270 // zinc ion bindi…	7362 // terminal region determination // inferred from genetic interaction /// 7390 // germ-band shortening // inferred from mutant phenotype /// 7390 // germ-band shortening // traceable author statement /// 7391 // dorsal closure // traceable author statement /// 7393 // dorsal closure, leading edge cell fate determination // non-traceable author statement /// 7398 // ectoderm development // tr…	5634 // nucleus // inferred from direct assay /// 5634 // nucleus // non-traceable author statement /// 5634 // nucleus // inferred from electronic annotation	---
2428	143627_at	0.571384	2.94399	7.04035	6.11e-08	5.68e-07	7.73715	FBgn0010434	CG11949	cora	coracle	37205	3779 // actin binding // inferred from electronic annotation /// 5200 // structural constituent of cytoskeleton // inferred from electronic annotation /// 8092 // cytoskeletal protein binding // inferred from sequence or structural similarity /// 5515 // protein binding // inferred from physical interaction /// 5198 // structural molecule activity // inferred from electronic annotation /// 5488 /…	6612 // protein targeting to membrane // traceable author statement /// 7010 // cytoskeleton organization and biogenesis // inferred from sequence or structural similarity /// 7163 // establishment and/or maintenance of cell polarity // non-traceable author statement /// 7391 // dorsal closure // non-traceable author statement /// 7391 // dorsal closure // traceable author statement /// 7435 // s…	5856 // cytoskeleton // inferred from sequence or structural similarity /// 5918 // septate junction // inferred from direct assay /// 5918 // septate junction // non-traceable author statement /// 5918 // septate junction // traceable author statement /// 16327 // apicolateral plasma membrane // non-traceable author statement /// 45169 // fusome // inferred from direct assay /// 45170 // spectro…	IPR000299 // Band 4.1 // 2.6E-75 /// IPR008379 // 4.1, C-terminal // 5.5E-38 /// IPR008379 // 4.1, C-terminal // 5.5E-38 /// IPR008379 // 4.1, C-terminal // 5.5E-38 /// IPR008379 // 4.1, C-terminal // 5.5E-38
13757	154956_at	0.570955	1.48722	8.77676	5.79e-10	8.5e-09	12.4352	FBgn0039073	CG4408	CG4408	CG4408	42762	4181 // metallocarboxypeptidase activity // inferred from sequence or structural similarity /// 4182 // carboxypeptidase A activity // inferred from electronic annotation /// 4181 // metallocarboxypeptidase activity // inferred from sequence similarity	6508 // proteolysis // inferred from electronic annotation	---	IPR000834 // Peptidase M14, carboxypeptidase A // 1.8E-68
12027	153226_at	0.570736	2.07743	4.49932	8.73e-05	0.000397225	0.488148	FBgn0046812	CG7439	AGO2	Argonaute 2	39683	3743 // translation initiation factor activity // inferred from sequence or structural similarity /// 5515 // protein binding // inferred from physical interaction /// 3723 // RNA binding // inferred from electronic annotation /// 3743 // translation initiation factor activity // inferred from sequence similarity	6413 // translational initiation // inferred from sequence or structural similarity /// 16246 // RNA interference // inferred from mutant phenotype /// 16246 // RNA interference // non-traceable author statement /// 16246 // RNA interference // traceable author statement /// 30422 // RNA interference, production of siRNA // inferred from direct assay /// 30423 // RNA interference, targeting of mR…	16442 // RNA-induced silencing complex // inferred from direct assay /// 16442 // RNA-induced silencing complex // traceable author statement	IPR003100 // Argonaute and Dicer protein, PAZ // 4.6E-50 /// IPR003165 // Stem cell self-renewal protein Piwi // 3.8E-89 /// IPR003100 // Argonaute and Dicer protein, PAZ // 4.6E-50 /// IPR003165 // Stem cell self-renewal protein Piwi // 3.8E-89
327	141526_at	0.570136	2.69647	10.032	2.53e-11	5.21e-10	15.5972	FBgn0001222	CG5748	Hsf	Heat shock factor	37068	3677 // DNA binding // inferred from direct assay /// 3677 // DNA binding // non-traceable author statement /// 3677 // DNA binding // traceable author statement /// 3700 // transcription factor activity // inferred from electronic annotation /// 3704 // specific RNA polymerase II transcription factor activity // inferred from direct assay /// 3704 // specific RNA polymerase II transcription fact…	6357 // regulation of transcription from RNA polymerase II promoter // inferred from electronic annotation /// 6952 // defense response // inferred from electronic annotation /// 9408 // response to heat // inferred from direct assay /// 9408 // response to heat // non-traceable author statement /// 9408 // response to heat // traceable author statement /// 6350 // transcription // inferred from …	5634 // nucleus // inferred from direct assay /// 5634 // nucleus // inferred from sequence or structural similarity /// 5634 // nucleus // non-traceable author statement /// 5700 // polytene chromosome // inferred from direct assay /// 5634 // nucleus // inferred from electronic annotation /// 5634 // nucleus // inferred from sequence similarity	IPR000232 // Heat shock factor (HSF)-type DNA-binding domain // 6.1E-123
505	141704_at	0.568315	3.30883	7.50893	1.68e-08	1.77e-07	9.03851	FBgn0032456	CG6214	CG6214	CG6214	34686	166 // nucleotide binding // inferred from electronic annotation /// 4672 // protein kinase activity // inferred from electronic annotation /// 5524 // ATP binding // inferred from electronic annotation /// 8559 // xenobiotic-transporting ATPase activity // inferred from sequence or structural similarity /// 5215 // transporter activity // inferred from electronic annotation /// 16887 // ATPase a…	6468 // protein amino acid phosphorylation // inferred from electronic annotation /// 6858 // extracellular transport // inferred from electronic annotation /// 6952 // defense response // inferred from electronic annotation /// 9636 // response to toxin // inferred from electronic annotation /// 6810 // transport // inferred from electronic annotation	16021 // integral to membrane // inferred from electronic annotation /// 16020 // membrane // inferred from electronic annotation	IPR001140 // ABC transporter, transmembrane region // 5.8E-50 /// IPR001140 // ABC transporter, transmembrane region // 7.7E-30 /// IPR003439 // ABC transporter // 3.6E-30 /// IPR003439 // ABC transporter // 1.8E-52 /// IPR001140 // ABC transporter, transmembrane region // 3.2E-52 /// IPR001140 // ABC transporter, transmembrane region // 4.5E-37 /// IPR003439 // ABC transporter // 1.8E-52 /// IPR…
8969	150168_at	0.568189	3.85961	4.68557	5.12e-05	0.000246587	1.01398	FBgn0038658 /// FBgn0064439	CG14292	CG14292 /// DpseGA12884	CG14292 /// GA12884	42264	---	---	---	---
860	142059_at	0.56804	1.32692	6.71559	1.52e-07	1.3e-06	6.82312	---	---	---	---	---	---	---	---	---
1700	142899_at	0.567389	1.94612	7.55935	1.46e-08	1.57e-07	9.17718	FBgn0032197	CG5694	CG5694	CG5694	34362	5515 // protein binding // inferred from physical interaction	---	---	---
10989	152188_at	0.566626	1.18426	6.27291	5.32e-07	4.11e-06	5.56429	FBgn0020278	CG5248	loco	locomotion defects	42672	5083 // small GTPase regulator activity // inferred from electronic annotation /// 5096 // GTPase activator activity // inferred from electronic annotation /// 5515 // protein binding // inferred from electronic annotation /// 16299 // regulator of G-protein signaling activity // inferred from sequence or structural similarity /// 5057 // receptor signaling protein activity // inferred from elect…	7303 // cytoplasmic transport, nurse cell to oocyte // inferred from mutant phenotype /// 8069 // dorsal/ventral axis determination, follicular epithelium (sensu Insecta) // inferred from mutant phenotype /// 8277 // regulation of G-protein coupled receptor protein signaling pathway // inferred from sequence or structural similarity /// 8277 // regulation of G-protein coupled receptor protein sig…	---	IPR001478 // PDZ/DHR/GLGF domain // 1.3E-12 /// IPR006020 // Phosphotyrosine interaction domain // 1.2E-5 /// IPR003116 // Raf-like Ras-binding // 7.0E-7 /// IPR000342 // Regulator of G protein // 1.1E-33 /// IPR003116 // Raf-like Ras-binding // 7.0E-7 /// IPR000342 // Regulator of G protein // 1.1E-33 /// IPR003116 // Raf-like Ras-binding // 7.0E-7 /// IPR000342 // Regulator of G protein // 1.1E…
10396	151595_at	0.566534	2.62043	7.4923	1.76e-08	1.85e-07	8.99271	---	CG32056	---	---	---	---	---	---	IPR005552 // Scramblase // 1.0E-126 /// IPR005552 // Scramblase // 1.0E-126 /// IPR005552 // Scramblase // 1.0E-126
11662	152861_at	0.565486	1.67718	4.54329	7.7e-05	0.000356673	0.611913	FBgn0033391	CG8026	CG8026	CG8026	35941	5386 // carrier activity // inferred from sequence or structural similarity /// 5488 // binding // inferred from electronic annotation /// 8517 // folic acid transporter activity // inferred from sequence or structural similarity /// 5215 // transporter activity // inferred from electronic annotation /// 5386 // carrier activity // inferred from sequence similarity /// 8517 // folic acid transpor…	6839 // mitochondrial transport // inferred from sequence or structural similarity /// 15884 // folic acid transport // inferred from sequence or structural similarity /// 6810 // transport // inferred from electronic annotation /// 6839 // mitochondrial transport // inferred from electronic annotation /// 6839 // mitochondrial transport // inferred from sequence similarity /// 15884 // folic aci…	5740 // mitochondrial envelope // inferred from sequence or structural similarity /// 5743 // mitochondrial inner membrane // inferred from sequence or structural similarity /// 5739 // mitochondrion // inferred from electronic annotation /// 5743 // mitochondrial inner membrane // inferred from electronic annotation /// 16020 // membrane // inferred from electronic annotation /// 16021 // integr…	IPR001993 // Mitochondrial substrate carrier // 2.5E-30 /// IPR001993 // Mitochondrial substrate carrier // 4.4E-31 /// IPR001993 // Mitochondrial substrate carrier // 1.3E-16 /// IPR001993 // Mitochondrial substrate carrier // 1.7E-10
12035	153234_at	0.564779	1.96514	6.12346	8.15e-07	6.08e-06	5.13666	FBgn0036929	CG7668	CG7668	CG7668	40190	5102 // receptor binding // inferred from electronic annotation	6952 // defense response // inferred from electronic annotation /// 42742 // defense response to bacteria // inferred from electronic annotation	---	IPR002181 // Fibrinogen, beta/gamma chain, C-terminal globular // 4.2E-25 /// IPR002181 // Fibrinogen, beta/gamma chain, C-terminal globular // 4.2E-25
11843	153042_at	0.564042	1.14635	7.81353	7.34e-09	8.35e-08	9.87202	FBgn0036968	CG6680	CG6680	CG6680	40234	4867 // serine-type endopeptidase inhibitor activity // inferred from sequence or structural similarity /// 4867 // serine-type endopeptidase inhibitor activity // inferred from electronic annotation /// 4867 // serine-type endopeptidase inhibitor activity // inferred from sequence similarity	6508 // proteolysis // inferred from electronic annotation /// 6915 // apoptosis // inferred from electronic annotation	---	IPR000215 // Serpin // 1.7E-51
5551	146750_at	0.563403	1.14443	7.12242	4.87e-08	4.62e-07	7.96666	FBgn0033194	CG2093	CG2093	CG2093	35693	---	6623 // protein targeting to vacuole // inferred from sequence or structural similarity /// 6623 // protein targeting to vacuole // inferred from sequence similarity	---	IPR009543 // Protein of unknown function DUF1162 // 1.0E-126
13710	154909_at	0.563203	5.76936	7.29641	3.01e-08	2.99e-07	8.45105	FBgn0005278	CG2674	M(2)21AB	Minute (2) 21AB	48552	4478 // methionine adenosyltransferase activity // inferred from sequence or structural similarity /// 4478 // methionine adenosyltransferase activity // non-traceable author statement /// 5524 // ATP binding // inferred from electronic annotation /// 16779 // nucleotidyltransferase activity // inferred from electronic annotation /// 5515 // protein binding // inferred from physical interaction /…	6556 // S-adenosylmethionine biosynthesis // inferred from mutant phenotype /// 6556 // S-adenosylmethionine biosynthesis // non-traceable author statement /// 6730 // one-carbon compound metabolism // non-traceable author statement /// 6730 // one-carbon compound metabolism // inferred from electronic annotation	---	IPR002133 // S-adenosylmethionine synthetase // 2.5E-66 /// IPR002133 // S-adenosylmethionine synthetase // 3.4E-98 /// IPR002133 // S-adenosylmethionine synthetase // 4.6E-94 /// IPR002133 // S-adenosylmethionine synthetase // 5.3E-65 /// IPR002133 // S-adenosylmethionine synthetase // 1.1E-93 /// IPR002133 // S-adenosylmethionine synthetase // 3.4E-98 /// IPR002133 // S-adenosylmethionine synth…
1457	142656_at	0.56265	1.45585	6.48803	2.88e-07	2.33e-06	6.17765	FBgn0004556	CG9680	Dbp73D	Dead box protein 73D	39871	3676 // nucleic acid binding // inferred from electronic annotation /// 4004 // ATP-dependent RNA helicase activity // non-traceable author statement /// 5524 // ATP binding // inferred from electronic annotation /// 166 // nucleotide binding // inferred from electronic annotation /// 3723 // RNA binding // inferred from electronic annotation /// 4386 // helicase activity // inferred from electro…	6139 // nucleobase, nucleoside, nucleotide and nucleic acid metabolism // inferred from electronic annotation	5634 // nucleus // inferred from electronic annotation	IPR001650 // Helicase, C-terminal // 1.3E-26 /// IPR001410 // DEAD/DEAH box helicase // 1.2E-63
12756	153955_at	0.562545	3.24487	3.35277	0.00209636	0.0061611	-2.60384	FBgn0025381	CG14782	CG14782	CG14782	31105	5085 // guanyl-nucleotide exchange factor activity // inferred from sequence or structural similarity /// 8270 // zinc ion binding // inferred from electronic annotation /// 5085 // guanyl-nucleotide exchange factor activity // inferred from sequence similarity	1501 // skeletal development // inferred from electronic annotation /// 7010 // cytoskeleton organization and biogenesis // inferred from electronic annotation /// 7498 // mesoderm development // inferred from electronic annotation	---	IPR001849 // Pleckstrin-like // 2.2E-19 /// IPR000306 // Zn-finger, FYVE type // 1.1E-26
5829	147028_i_at	0.562499	4.11951	3.81179	0.000604379	0.0021264	-1.4044	FBgn0050035	CG30035	CG30035	CG30035	36248	5351 // sugar porter activity // inferred from electronic annotation /// 5355 // glucose transporter activity // inferred from sequence or structural similarity /// 5215 // transporter activity // inferred from electronic annotation /// 5355 // glucose transporter activity // inferred from sequence similarity	5975 // carbohydrate metabolism // inferred from electronic annotation /// 8643 // carbohydrate transport // inferred from sequence or structural similarity /// 6810 // transport // inferred from electronic annotation /// 8643 // carbohydrate transport // inferred from electronic annotation /// 8643 // carbohydrate transport // inferred from sequence similarity	16021 // integral to membrane // inferred from sequence or structural similarity /// 16020 // membrane // inferred from electronic annotation /// 16021 // integral to membrane // inferred from electronic annotation /// 16021 // integral to membrane // inferred from sequence similarity	IPR005828 // General substrate transporter // 9.9E-99 /// IPR005828 // General substrate transporter // 9.9E-99
5748	146947_at	0.562359	0.462352	4.83639	3.32e-05	0.00016866	1.4425	FBgn0033519	CG11825	CG11825	CG11825	36099	---	---	---	IPR007667 // Hypoxia induced protein conserved region // 2.3E-35
12160	153359_at	0.561951	3.37558	7.17999	4.15e-08	4.01e-07	8.12726	FBgn0040309	CG1633	Jafrac1	thioredoxin peroxidase 1	53578	4601 // peroxidase activity // non-traceable author statement /// 4602 // glutathione peroxidase activity // inferred from direct assay /// 8379 // thioredoxin peroxidase activity // inferred from direct assay /// 8379 // thioredoxin peroxidase activity // inferred from sequence or structural similarity /// 8379 // thioredoxin peroxidase activity // non-traceable author statement /// 16209 // ant…	6800 // oxygen and reactive oxygen species metabolism // inferred from electronic annotation /// 6952 // defense response // inferred from electronic annotation /// 45454 // cell redox homeostasis // inferred from direct assay	5829 // cytosol // inferred from direct assay /// 5829 // cytosol // non-traceable author statement	IPR000866 // Alkyl hydroperoxide reductase/ Thiol specific antioxidant/ Mal allergen // 1.1E-76
4308	145507_at	0.560648	2.37858	5.61399	3.52e-06	2.26e-05	3.67304	FBgn0031213	CG11372	galectin	galectin	33162	5102 // receptor binding // inferred from electronic annotation /// 15143 // urate transporter activity // inferred from sequence or structural similarity /// 16936 // galactoside binding // inferred from direct assay /// 16936 // galactoside binding // inferred from sequence or structural similarity /// 5529 // sugar binding // inferred from electronic annotation /// 15143 // urate transporter a…	6917 // induction of apoptosis // inferred from electronic annotation	5829 // cytosol // inferred from direct assay	IPR001079 // Galectin, galactose-binding lectin // 3.2E-19 /// IPR001079 // Galectin, galactose-binding lectin // 3.1E-9
8091	149290_at	0.560405	3.41697	6.69795	1.59e-07	1.36e-06	6.77323	FBgn0037270	CG9769	CG9769	CG9769	40587	3743 // translation initiation factor activity // inferred from sequence or structural similarity /// 5515 // protein binding // inferred from physical interaction /// 3743 // translation initiation factor activity // inferred from sequence similarity	6413 // translational initiation // inferred from sequence or structural similarity /// 35071 // salivary gland cell autophagic cell death // inferred from expression pattern /// 48102 // autophagic cell death // inferred from expression pattern /// 6413 // translational initiation // inferred from sequence similarity	5852 // eukaryotic translation initiation factor 3 complex // inferred from sequence or structural similarity /// 5852 // eukaryotic translation initiation factor 3 complex // inferred from sequence similarity	IPR000555 // Peptidase M67, Mov34 // 2.4E-27
2729	143928_at	0.560306	3.74716	9.64817	6.46e-11	1.2e-09	14.6523	FBgn0020443	CG6382	Elf	Ef1like factor	34658	3747 // translation release factor activity // inferred from sequence or structural similarity /// 3747 // translation release factor activity // non-traceable author statement /// 3924 // GTPase activity // non-traceable author statement /// 5525 // GTP binding // inferred from sequence or structural similarity /// 8079 // translation termination factor activity // inferred from sequence or stru…	6415 // translational termination // inferred from mutant phenotype /// 6415 // translational termination // inferred from sequence or structural similarity /// 6415 // translational termination // non-traceable author statement /// 6445 // regulation of translation // inferred from electronic annotation /// 6412 // protein biosynthesis // inferred from electronic annotation /// 6415 // translati…	5829 // cytosol // inferred from sequence or structural similarity /// 5829 // cytosol // non-traceable author statement /// 5829 // cytosol // inferred from sequence similarity	IPR004161 // Elongation factor Tu, domain 2 // 5.4E-14 /// IPR000795 // Protein synthesis factor, GTP-binding // 4.0E-89 /// IPR004160 // Elongation factor Tu, C-terminal // 1.5E-38
586	141785_at	0.560209	2.1275	7.74308	8.88e-09	9.97e-08	9.68016	FBgn0034243	CG6501	Ngp	Ngp	36989	5102 // receptor binding // inferred from electronic annotation /// 5525 // GTP binding // non-traceable author statement /// 5525 // GTP binding // inferred from electronic annotation	6886 // intracellular protein transport // inferred from electronic annotation /// 7166 // cell surface receptor linked signal transduction // inferred from electronic annotation /// 7242 // intracellular signaling cascade // inferred from electronic annotation	5634 // nucleus // non-traceable author statement /// 5622 // intracellular // inferred from electronic annotation	IPR002917 // GTP-binding protein, HSR1-related // 4.8E-102
10905	152104_at	0.559828	0.720874	6.03056	1.06e-06	7.76e-06	4.87035	FBgn0050295	CG30295	Ipk1	Ipk1	37360	35299 // inositol pentakisphosphate 2-kinase activity // inferred from mutant phenotype /// 166 // nucleotide binding // inferred from electronic annotation /// 5524 // ATP binding // inferred from electronic annotation /// 16301 // kinase activity // inferred from electronic annotation /// 16740 // transferase activity // inferred from electronic annotation	46853 // inositol and derivative phosphorylation // inferred from mutant phenotype	5634 // nucleus // inferred from electronic annotation	IPR009286 // Protein of unknown function DUF941 // 1.0E-126
11252	152451_at	0.559441	1.05287	11.3079	1.3e-12	4e-11	18.6	---	CG14681 /// CG33676	---	---	---	5198 // structural molecule activity // inferred from direct assay /// 4500 // dopamine beta-monooxygenase activity // traceable author statement /// 4500 // dopamine beta-monooxygenase activity // inferred from electronic annotation	6997 // nuclear organization and biogenesis // non-traceable author statement /// 51227 // mitotic spindle assembly // inferred from direct assay /// 6584 // catecholamine metabolism // traceable author statement /// 7049 // cell cycle // inferred from electronic annotation /// 7067 // mitosis // inferred from electronic annotation /// 51301 // cell division // inferred from electronic annotation…	5634 // nucleus // inferred from direct assay /// 5652 // nuclear lamina // inferred from direct assay /// 5694 // chromosome // inferred from direct assay /// 5694 // chromosome // non-traceable author statement /// 5700 // polytene chromosome // inferred from direct assay /// 5819 // spindle // inferred from direct assay /// 16363 // nuclear matrix // inferred from direct assay /// 5634 // nucl…	---
4814	146013_at	0.558744	3.08817	6.91526	8.66e-08	7.8e-07	7.38617	FBgn0032001	CG8360	CG8360	CG8360	34122	4126 // cytidine deaminase activity // inferred from sequence or structural similarity /// 8270 // zinc ion binding // inferred from electronic annotation /// 42802 // identical protein binding // inferred from physical interaction /// 4126 // cytidine deaminase activity // inferred from electronic annotation /// 16787 // hydrolase activity // inferred from electronic annotation /// 4126 // cytid…	6206 // pyrimidine base metabolism // inferred from electronic annotation /// 46087 // cytidine metabolism // inferred from electronic annotation	---	IPR002125 // Cytidine/deoxycytidylate deaminase, zinc-binding region // 1.3E-23
2585	143784_at	0.55818	5.45138	7.06872	5.65e-08	5.28e-07	7.81655	FBgn0015221	CG1469	Fer2LCH	Ferritin 2 light chain homologue	44965	8198 // ferrous iron binding // inferred from direct assay /// 8199 // ferric iron binding // inferred from electronic annotation	6879 // iron ion homeostasis // inferred from direct assay /// 6879 // iron ion homeostasis // inferred from electronic annotation	8043 // ferritin complex // inferred from direct assay	---
11096	152295_at	0.557953	0.704522	7.65368	1.13e-08	1.24e-07	9.43588	FBgn0027553	CG32721	CG32721	CG32721	31681	3729 // mRNA binding // inferred from sequence or structural similarity /// 3723 // RNA binding // inferred from sequence or structural similarity /// 3729 // mRNA binding // inferred from sequence similarity	7070 // negative regulation of transcription from RNA polymerase II promoter, mitotic // inferred from sequence or structural similarity /// 6350 // transcription // inferred from electronic annotation /// 6355 // regulation of transcription, DNA-dependent // inferred from electronic annotation /// 16481 // negative regulation of transcription // inferred from electronic annotation /// 7070 // ne…	17053 // transcriptional repressor complex // inferred from sequence or structural similarity /// 5634 // nucleus // inferred from electronic annotation /// 17053 // transcriptional repressor complex // inferred from sequence similarity	IPR010405 // Cofactor of BRCA1 // 1.0E-126
13134	154333_at	0.556287	2.91173	7.38331	2.37e-08	2.42e-07	8.69184	FBgn0000634	CG6588	Fas1	Fasciclin 1	42025	50839 // cell adhesion molecule binding // inferred from direct assay /// 5515 // protein binding // inferred from electronic annotation	7156 // homophilic cell adhesion // inferred from direct assay /// 7158 // neuron adhesion // inferred from sequence or structural similarity /// 7158 // neuron adhesion // non-traceable author statement /// 7411 // axon guidance // inferred from genetic interaction /// 7411 // axon guidance // non-traceable author statement /// 8038 // neuron recognition // inferred from direct assay /// 8038 //…	5886 // plasma membrane // inferred from direct assay /// 5886 // plasma membrane // non-traceable author statement /// 16020 // membrane // inferred from electronic annotation	IPR000782 // Beta-Ig-H3/fasciclin // 5.7E-6 /// IPR000782 // Beta-Ig-H3/fasciclin // 7.3E-7 /// IPR000782 // Beta-Ig-H3/fasciclin // 4.9E-21 /// IPR000782 // Beta-Ig-H3/fasciclin // 7.3E-7 /// IPR000782 // Beta-Ig-H3/fasciclin // 4.9E-21 /// IPR000782 // Beta-Ig-H3/fasciclin // 7.3E-7 /// IPR000782 // Beta-Ig-H3/fasciclin // 4.9E-21
12339	153538_at	0.556094	2.23184	10.5403	7.57e-12	1.85e-10	16.8187	FBgn0033717	CG8839	CG8839	CG8839	36340	17064 // fatty acid amide hydrolase activity // inferred from sequence or structural similarity /// 4040 // amidase activity // inferred from electronic annotation /// 17064 // fatty acid amide hydrolase activity // inferred from sequence similarity	6807 // nitrogen compound metabolism // inferred from electronic annotation	---	IPR000120 // Amidase // 1.8E-56 /// IPR000120 // Amidase // 1.7E-15
13186	154385_at	0.555872	1.77255	6.81068	1.16e-07	1.01e-06	7.09166	FBgn0034590	CG30388	Magi	Magi	37403	4385 // guanylate kinase activity // inferred from sequence or structural similarity /// 4385 // guanylate kinase activity // non-traceable author statement /// 5102 // receptor binding // inferred from electronic annotation /// 5515 // protein binding // inferred from electronic annotation /// 4385 // guanylate kinase activity // inferred from sequence similarity	6605 // protein targeting // inferred from electronic annotation /// 7242 // intracellular signaling cascade // inferred from electronic annotation /// 8105 // asymmetric protein localization // inferred from electronic annotation	16020 // membrane // inferred from sequence or structural similarity /// 16020 // membrane // non-traceable author statement /// 16020 // membrane // inferred from sequence similarity	IPR001478 // PDZ/DHR/GLGF domain // 3.6E-6 /// IPR001478 // PDZ/DHR/GLGF domain // 7.5E-6 /// IPR001478 // PDZ/DHR/GLGF domain // 2.6E-10 /// IPR001478 // PDZ/DHR/GLGF domain // 1.7E-16 /// IPR001202 // WW/Rsp5/WWP domain // 1.1E-11 /// IPR001202 // WW/Rsp5/WWP domain // 3.0E-9
2835	144034_at	0.554787	1.64153	9.02054	3.1e-10	4.85e-09	13.0654	FBgn0024943	CG11219	PIP82	PIP82	31791	---	---	---	---
13873	155072_at	0.554558	1.16319	8.62422	8.59e-10	1.2e-08	12.037	FBgn0028383	CG32386	corn	cornetto	38786	5515 // protein binding // inferred from physical interaction /// 8017 // microtubule binding // inferred from direct assay	---	5737 // cytoplasm // inferred from direct assay /// 5938 // cell cortex // inferred from direct assay /// 45177 // apical part of cell // inferred from direct assay	---
11706	152905_at	0.552664	3.2923	6.24678	5.73e-07	4.4e-06	5.48961	FBgn0050344	CG30344	CG30344	CG30344	246552	5515 // protein binding // inferred from physical interaction /// 5215 // transporter activity // inferred from electronic annotation	6810 // transport // inferred from electronic annotation	16020 // membrane // inferred from electronic annotation /// 16021 // integral to membrane // inferred from electronic annotation	IPR005828 // General substrate transporter // 6.6E-5
11238	152437_at	0.552592	1.31415	7.62793	1.21e-08	1.32e-07	9.36538	FBgn0064237	CG5154	Idgf5	Imaginal disc growth factor 5	37104	4568 // chitinase activity // inferred from sequence or structural similarity /// 8083 // growth factor activity // inferred from electronic annotation /// 8084 // imaginal disc growth factor activity // inferred from direct assay /// 16799 // hydrolase activity, hydrolyzing N-glycosyl compounds // inferred from electronic annotation /// 4553 // hydrolase activity, hydrolyzing O-glycosyl compound…	5976 // polysaccharide metabolism // inferred from electronic annotation /// 7165 // signal transduction // inferred from electronic annotation /// 7267 // cell-cell signaling // inferred from electronic annotation /// 7444 // imaginal disc development // inferred from direct assay /// 5975 // carbohydrate metabolism // inferred from electronic annotation /// 6032 // chitin catabolism // inferred…	5576 // extracellular region // non-traceable author statement	IPR001223 // Glycoside hydrolase, family 18 // 1.1E-81
13526	154725_at	0.552563	2.36767	3.79071	0.000640548	0.00223347	-1.46081	FBgn0004603	CG7873	Src42A	Src oncogene at 42A	35524	4713 // protein-tyrosine kinase activity // inferred from direct assay /// 4713 // protein-tyrosine kinase activity // inferred from sequence or structural similarity /// 4713 // protein-tyrosine kinase activity // non-traceable author statement /// 4715 // non-membrane spanning protein tyrosine kinase activity // inferred from sequence or structural similarity /// 5524 // ATP binding // inferred…	74 // regulation of progression through cell cycle // inferred from electronic annotation /// 6468 // protein amino acid phosphorylation // inferred from direct assay /// 6468 // protein amino acid phosphorylation // inferred from mutant phenotype /// 6468 // protein amino acid phosphorylation // non-traceable author statement /// 7154 // cell communication // inferred from direct assay /// 7169 …	5912 // adherens junction // inferred from direct assay /// 16020 // membrane // inferred from electronic annotation /// 16021 // integral to membrane // inferred from electronic annotation	IPR000980 // SH2 motif // 1.2E-48 /// IPR001452 // SH3 // 1.1E-25 /// IPR000719 // Protein kinase // 2.5E-88
11269	152468_at	0.552429	1.84541	7.10326	5.13e-08	4.86e-07	7.91312	FBgn0051199	CG31199	CG31199	CG31199	42456	4252 // serine-type endopeptidase activity // non-traceable author statement /// 4295 // trypsin activity // inferred from electronic annotation /// 4252 // serine-type endopeptidase activity // inferred from electronic annotation	6508 // proteolysis // inferred from electronic annotation	---	IPR001254 // Peptidase S1, chymotrypsin // 1.5E-8
2072	143271_at	0.552045	4.25545	4.8809	2.92e-05	0.000150334	1.56937	FBgn0002789	CG4696	Mp20	Muscle protein 20	36468	3779 // actin binding // inferred from sequence or structural similarity /// 5200 // structural constituent of cytoskeleton // inferred from electronic annotation /// 5509 // calcium ion binding // inferred from sequence or structural similarity /// 5515 // protein binding // inferred from physical interaction /// 3779 // actin binding // inferred from sequence similarity /// 5509 // calcium ion …	6936 // muscle contraction // inferred from electronic annotation /// 7155 // cell adhesion // inferred from mutant phenotype /// 7517 // muscle development // inferred from electronic annotation /// 8360 // regulation of cell shape // inferred from mutant phenotype	43292 // contractile fiber // non-traceable author statement	IPR001715 // Calponin-like actin-binding // 1.2E-21 /// IPR000557 // Calponin repeat // 2.5E-6
2213	143412_at	0.551555	1.93473	6.95088	7.84e-08	7.12e-07	7.48625	FBgn0004002	CG15288	wb	wing blister	43946	3779 // actin binding // inferred from electronic annotation /// 5102 // receptor binding // inferred from electronic annotation /// 5198 // structural molecule activity // inferred from electronic annotation /// 5488 // binding // traceable author statement /// 5515 // protein binding // inferred from electronic annotation	7160 // cell-matrix adhesion // inferred from electronic annotation /// 7165 // signal transduction // inferred from electronic annotation /// 7267 // cell-cell signaling // non-traceable author statement /// 16337 // cell-cell adhesion // inferred from electronic annotation /// 30155 // regulation of cell adhesion // inferred from electronic annotation /// 30334 // regulation of cell migration /…	5604 // basement membrane // inferred from sequence or structural similarity /// 5605 // basal lamina // inferred from direct assay /// 5605 // basal lamina // inferred from sequence or structural similarity /// 5605 // basal lamina // non-traceable author statement /// 5606 // laminin-1 // inferred from electronic annotation /// 5578 // extracellular matrix (sensu Metazoa) // inferred from elect…	IPR008211 // Laminin, N-terminal // 8.6E-52 /// IPR002049 // Laminin-type EGF-like domain // 2.5E-21 /// IPR000034 // Laminin B // 1.6E-4 /// IPR000034 // Laminin B // 1.9E-5 /// IPR000034 // Laminin B // 1.4E-6 /// IPR010307 // Laminin II // 5.9E-56 /// IPR001791 // Laminin G // 8.0E-15 /// IPR001791 // Laminin G // 6.4E-12 /// IPR001791 // Laminin G // 6.7E-19 /// IPR001791 // Laminin G // 5.4E…
12886	154085_at	0.551551	1.59069	5.73064	2.52e-06	1.68e-05	4.00863	FBgn0000566	CG5345	Eip55E	Eip55E	37143	4123 // cystathionine gamma-lyase activity // non-traceable author statement /// 4123 // cystathionine gamma-lyase activity // traceable author statement /// 5515 // protein binding // inferred from physical interaction	96 // sulfur amino acid metabolism // non-traceable author statement /// 6520 // amino acid metabolism // inferred from electronic annotation	---	IPR000277 // Cys/Met metabolism pyridoxal-phosphate-dependent enzymes // 1.0E-126
1359	142558_s_at	0.551068	3.91203	5.6552	3.13e-06	2.02e-05	3.79161	FBgn0027066	CG3265	Eb1	Eb1	35584	5102 // receptor binding // inferred from electronic annotation /// 8017 // microtubule binding // inferred from sequence or structural similarity /// 8017 // microtubule binding // traceable author statement /// 8017 // microtubule binding // inferred from electronic annotation /// 8017 // microtubule binding // inferred from sequence similarity	22 // mitotic spindle elongation // inferred from direct assay /// 74 // regulation of progression through cell cycle // inferred from electronic annotation /// 7017 // microtubule-based process // inferred from sequence or structural similarity /// 7017 // microtubule-based process // traceable author statement /// 7052 // mitotic spindle organization and biogenesis // traceable author statement…	5874 // microtubule // inferred from direct assay /// 5875 // microtubule associated complex // inferred from sequence or structural similarity /// 5875 // microtubule associated complex // traceable author statement /// 5875 // microtubule associated complex // inferred from sequence similarity	IPR004953 // EB1 protein // 1.6E-30 /// IPR001715 // Calponin-like actin-binding // 4.8E-15 /// IPR004953 // EB1 protein // 1.6E-30 /// IPR001715 // Calponin-like actin-binding // 5.8E-16 /// IPR004953 // EB1 protein // 1.6E-30
12430	153629_at	0.550543	1.00227	7.02272	6.42e-08	5.94e-07	7.68776	FBgn0020270	CG16928	mre11	meiotic recombination 11	34565	3676 // nucleic acid binding // inferred from electronic annotation /// 4519 // endonuclease activity // inferred from sequence or structural similarity /// 4519 // endonuclease activity // non-traceable author statement /// 4520 // endodeoxyribonuclease activity // inferred from electronic annotation /// 4527 // exonuclease activity // inferred from sequence or structural similarity /// 4527 // …	723 // telomere maintenance // inferred from mutant phenotype /// 6289 // nucleotide-excision repair // non-traceable author statement /// 6302 // double-strand break repair // inferred from sequence or structural similarity /// 7001 // chromosome organization and biogenesis (sensu Eukaryota) // inferred from mutant phenotype /// 7126 // meiosis // inferred from electronic annotation /// 6259 // …	5634 // nucleus // inferred from electronic annotation	IPR004843 // Metallo-phosphoesterase // 9.5E-21 /// IPR007281 // Mre11 DNA-binding presumed domain // 1.0E-126
5868	147067_at	0.549952	5.99385	8.66112	7.81e-10	1.11e-08	12.1336	FBgn0033699	CG8857	RpS11	Ribosomal protein S11	36321	3676 // nucleic acid binding // inferred from electronic annotation /// 3735 // structural constituent of ribosome // inferred from sequence or structural similarity /// 3735 // structural constituent of ribosome // inferred from sequence similarity	6412 // protein biosynthesis // inferred from sequence or structural similarity /// 6412 // protein biosynthesis // inferred from sequence similarity	5843 // cytosolic small ribosomal subunit (sensu Eukaryota) // inferred from sequence or structural similarity /// 5843 // cytosolic small ribosomal subunit (sensu Eukaryota) // inferred from sequence similarity	IPR000266 // Ribosomal protein S17 // 1.6E-36 /// IPR000266 // Ribosomal protein S17 // 1.6E-36
11702	152901_at	0.548802	3.6743	4.91325	2.66e-05	0.000138519	1.66167	FBgn0032699	CG10383	CG10383	CG10383	35123	5488 // binding // inferred from electronic annotation	---	---	---
7623	148822_at	0.547883	0.876956	7.98474	4.63e-09	5.5e-08	10.3359	FBgn0041160	CG7554	comm2	comm2	39716	---	---	---	---
12019	153218_at	0.547557	2.34001	6.8649	9.98e-08	8.86e-07	7.24446	FBgn0034709	CG3074	CG3074	CG3074	37537	4213 // cathepsin B activity // inferred from sequence or structural similarity /// 5515 // protein binding // inferred from physical interaction /// 4197 // cysteine-type endopeptidase activity // inferred from electronic annotation /// 8234 // cysteine-type peptidase activity // inferred from electronic annotation /// 4213 // cathepsin B activity // inferred from sequence similarity	6508 // proteolysis // inferred from electronic annotation /// 19538 // protein metabolism // inferred from electronic annotation	---	IPR000668 // Peptidase C1A, papain // 4.3E-75
11109	152308_at	0.546172	5.89863	3.8784	0.000502667	0.00181	-1.22536	FBgn0034638	CG10433	CG10433	CG10433	37458	---	6952 // defense response // inferred from sequence or structural similarity /// 6952 // defense response // inferred from sequence similarity	---	---
12577	153776_at	0.54611	1.74704	5.70989	2.67e-06	1.77e-05	3.94894	FBgn0033051	CG7863	dream	dream	35528	30693 // caspase activity // inferred from sequence or structural similarity /// 30693 // caspase activity // non-traceable author statement /// 30693 // caspase activity // traceable author statement /// 30693 // caspase activity // inferred from electronic annotation /// 30693 // caspase activity // inferred from sequence similarity	6508 // proteolysis // inferred from electronic annotation /// 6915 // apoptosis // inferred from electronic annotation /// 7242 // intracellular signaling cascade // inferred from electronic annotation /// 12501 // programmed cell death // traceable author statement	---	IPR001309 // Caspase-1, p20 // 1.1E-68
1357	142556_at	0.54576	0.521167	7.2307	3.6e-08	3.53e-07	8.26846	---	---	---	---	---	5515 // protein binding // inferred from physical interaction /// 3755 // peptidyl-prolyl cis-trans isomerase activity // inferred from electronic annotation /// 16853 // isomerase activity // inferred from electronic annotation	31532 // actin cytoskeleton reorganization // inferred from mutant phenotype /// 6457 // protein folding // inferred from electronic annotation /// 915 // cytokinesis, contractile ring formation // non-traceable author statement	5813 // centrosome // traceable author statement	---
10213	151412_r_at	0.545698	1.88205	3.7174	0.000783545	0.00265225	-1.65612	---	---	---	---	---	---	---	---	---
13066	154265_at	0.545173	0.94422	5.8177	1.96e-06	1.34e-05	4.259	FBgn0033342	CG8258	CG8258	CG8258	35882	5524 // ATP binding // inferred from electronic annotation /// 42623 // ATPase activity, coupled // inferred from sequence or structural similarity /// 51082 // unfolded protein binding // inferred from electronic annotation /// 166 // nucleotide binding // inferred from electronic annotation /// 5515 // protein binding // inferred from electronic annotation /// 42623 // ATPase activity, coupled …	6457 // protein folding // inferred from electronic annotation /// 6457 // protein folding // inferred from sequence or structural similarity /// 44267 // cellular protein metabolism // inferred from electronic annotation /// 6457 // protein folding // inferred from sequence similarity	5832 // chaperonin-containing T-complex // inferred from sequence or structural similarity /// 5832 // chaperonin-containing T-complex // inferred from sequence similarity	IPR002423 // Chaperonin Cpn60/TCP-1 // 1.0E-126
8743	149942_at	0.545122	0.983191	7.1903	4.03e-08	3.91e-07	8.15597	FBgn0045035	CG6535	tefu	telomere fusion	41839	4672 // protein kinase activity // inferred from sequence or structural similarity /// 4672 // protein kinase activity // non-traceable author statement /// 4702 // receptor signaling protein serine/threonine kinase activity // inferred from electronic annotation /// 3677 // DNA binding // inferred from electronic annotation /// 4674 // protein serine/threonine kinase activity // inferred from el…	75 // cell cycle checkpoint // inferred from sequence or structural similarity /// 6281 // DNA repair // inferred from electronic annotation /// 6348 // chromatin silencing at telomere // inferred from mutant phenotype /// 6445 // regulation of translation // inferred from electronic annotation /// 6468 // protein amino acid phosphorylation // inferred from electronic annotation /// 7001 // chrom…	---	IPR000403 // Phosphatidylinositol 3- and 4-kinase // 8.4E-60 /// IPR003151 // PIK-related kinase, FAT // 2.1E-7 /// IPR003152 // PIK-related kinase, FATC // 4.6E-9
8387	149586_at	0.54443	3.10915	7.73137	9.17e-09	1.02e-07	9.6482	FBgn0037752	CG8495	RpS29	Ribosomal protein S29	41200	3676 // nucleic acid binding // inferred from electronic annotation /// 3735 // structural constituent of ribosome // inferred from sequence or structural similarity /// 3735 // structural constituent of ribosome // inferred from electronic annotation /// 3735 // structural constituent of ribosome // inferred from sequence similarity	6412 // protein biosynthesis // inferred from sequence or structural similarity /// 6412 // protein biosynthesis // inferred from electronic annotation /// 6412 // protein biosynthesis // inferred from sequence similarity	5843 // cytosolic small ribosomal subunit (sensu Eukaryota) // inferred from sequence or structural similarity /// 5622 // intracellular // inferred from electronic annotation /// 5840 // ribosome // inferred from electronic annotation /// 30529 // ribonucleoprotein complex // inferred from electronic annotation /// 5843 // cytosolic small ribosomal subunit (sensu Eukaryota) // inferred from sequ…	---
12542	153741_at	0.544193	2.74288	6.81221	1.16e-07	1.01e-06	7.09598	FBgn0028509	CG31811	cenG1A	centaurin gamma 1A	34803	5525 // GTP binding // inferred from electronic annotation /// 8060 // ARF GTPase activator activity // inferred from sequence or structural similarity /// 8060 // ARF GTPase activator activity // non-traceable author statement /// 5515 // protein binding // inferred from physical interaction /// 166 // nucleotide binding // inferred from electronic annotation /// 5096 // GTPase activator activit…	7186 // G-protein coupled receptor protein signaling pathway // inferred from electronic annotation /// 7264 // small GTPase mediated signal transduction // non-traceable author statement /// 43087 // regulation of GTPase activity // inferred from electronic annotation /// 7264 // small GTPase mediated signal transduction // inferred from electronic annotation	5634 // nucleus // non-traceable author statement	IPR001164 // Human Rev interacting-like protein (hRIP) // 2.8E-52 /// IPR002110 // Ankyrin // 7.5E-6 /// IPR001806 // Ras GTPase superfamily // 4.2E-9 /// IPR001849 // Pleckstrin-like // 2.7E-16 /// IPR001164 // Human Rev interacting-like protein (hRIP) // 2.8E-52 /// IPR002110 // Ankyrin // 7.5E-6 /// IPR001806 // Ras GTPase superfamily // 4.2E-9 /// IPR001849 // Pleckstrin-like // 2.7E-16 /// I…
91	141290_at	0.5435	3.17527	6.97769	7.28e-08	6.65e-07	7.56151	FBgn0034494	CG10444	CG10444	CG10444	37294	8324 // cation transporter activity // inferred from electronic annotation /// 8523 // sodium-dependent multivitamin transporter activity // inferred from sequence or structural similarity /// 5215 // transporter activity // inferred from electronic annotation /// 8523 // sodium-dependent multivitamin transporter activity // inferred from sequence similarity	6732 // coenzyme metabolism // inferred from electronic annotation /// 6812 // cation transport // inferred from electronic annotation /// 6858 // extracellular transport // inferred from electronic annotation /// 51189 // prosthetic group metabolism // inferred from electronic annotation /// 6810 // transport // inferred from electronic annotation /// 6811 // ion transport // inferred from elect…	16020 // membrane // inferred from electronic annotation /// 16021 // integral to membrane // inferred from electronic annotation	IPR001734 // Na+/solute symporter // 2.2E-7 /// IPR001734 // Na+/solute symporter // 7.9E-5
1126	142325_at	0.542289	2.14257	10.2452	1.52e-11	3.4e-10	16.1135	FBgn0039328	CG10675	CG10675	CG10675	43068	16301 // kinase activity // inferred from electronic annotation /// 16740 // transferase activity // inferred from electronic annotation	---	---	IPR004119 // Protein of unknown function DUF227 // 7.4E-63
10663	151862_at	0.54198	2.3017	4.16034	0.000228513	0.000917853	-0.45625	FBgn0029526	CG18166	CG18166	CG18166	30992	---	---	---	---
2242	143441_at	0.54128	2.75764	5.34973	7.55e-06	4.47e-05	2.91281	FBgn0004228	CG7936	mex1	midgut expression 1	39677	5515 // protein binding // inferred from physical interaction	7494 // midgut development // non-traceable author statement /// 9790 // embryonic development // non-traceable author statement /// 7275 // development // inferred from electronic annotation	---	---
12347	153546_at	0.540891	2.38495	7.99356	4.53e-09	5.39e-08	10.3597	FBgn0024238	CG8649	Fim	Fimbrin	32721	3779 // actin binding // inferred from sequence or structural similarity /// 3779 // actin binding // non-traceable author statement /// 5200 // structural constituent of cytoskeleton // inferred from electronic annotation /// 5509 // calcium ion binding // inferred from electronic annotation /// 3779 // actin binding // inferred from electronic annotation /// 3779 // actin binding // inferred fr…	7010 // cytoskeleton organization and biogenesis // inferred from electronic annotation /// 16321 // female meiosis chromosome segregation // inferred from mutant phenotype	---	IPR002048 // Calcium-binding EF-hand // 1.8E-6 /// IPR001715 // Calponin-like actin-binding // 1.6E-24 /// IPR001715 // Calponin-like actin-binding // 1.2E-16 /// IPR001715 // Calponin-like actin-binding // 1.5E-25 /// IPR001715 // Calponin-like actin-binding // 1.3E-22 /// IPR002048 // Calcium-binding EF-hand // 5.3E-4 /// IPR001715 // Calponin-like actin-binding // 1.6E-24 /// IPR001715 // Calp…
13422	154621_at	0.540708	3.86979	5.69586	2.78e-06	1.83e-05	3.9086	FBgn0027493	CG17273	CG17273	CG17273	42466	4019 // adenylosuccinate synthase activity // inferred from sequence or structural similarity /// 4019 // adenylosuccinate synthase activity // non-traceable author statement /// 5525 // GTP binding // inferred from electronic annotation /// 5515 // protein binding // inferred from physical interaction /// 166 // nucleotide binding // inferred from electronic annotation /// 287 // magnesium ion b…	6164 // purine nucleotide biosynthesis // non-traceable author statement /// 6164 // purine nucleotide biosynthesis // inferred from electronic annotation	---	IPR001114 // Adenylosuccinate synthetase // 1.0E-126
535	141734_at	0.540109	1.6486	7.43081	2.08e-08	2.14e-07	8.82312	FBgn0030808	CG4937	RhoGAP15B	RhoGAP15B	32686	5083 // small GTPase regulator activity // inferred from sequence or structural similarity /// 5096 // GTPase activator activity // inferred from electronic annotation /// 5083 // small GTPase regulator activity // inferred from sequence similarity	---	---	IPR000198 // RhoGAP domain // 1.6E-48
4917	146116_at	0.539678	1.39317	4.85987	3.1e-05	0.000158727	1.50942	FBgn0032175	CG13131	CG13131	CG13131	34334	---	---	---	---
13685	154884_at	0.538826	2.90533	5.36982	7.13e-06	4.25e-05	2.97057	FBgn0035763	CG8602	CG8602	CG8602	38808	5215 // transporter activity // inferred from electronic annotation	6810 // transport // inferred from electronic annotation /// 6811 // ion transport // inferred from electronic annotation /// 6812 // cation transport // inferred from electronic annotation /// 6858 // extracellular transport // inferred from electronic annotation	16021 // integral to membrane // inferred from electronic annotation /// 16020 // membrane // inferred from electronic annotation	---
11376	152575_at	0.53859	1.32243	8.46204	1.31e-09	1.76e-08	11.6104	FBgn0029810	CG12239	CG12239	CG12239	31509	---	---	---	---
8146	149345_at	0.538525	2.03276	6.48937	2.87e-07	2.33e-06	6.18148	FBgn0037354	CG12171	CG12171	CG12171	40690	16614 // oxidoreductase activity, acting on CH-OH group of donors // inferred from sequence or structural similarity /// 5515 // protein binding // inferred from physical interaction /// 16491 // oxidoreductase activity // inferred from electronic annotation /// 16614 // oxidoreductase activity, acting on CH-OH group of donors // inferred from sequence similarity	6629 // lipid metabolism // inferred from electronic annotation /// 8152 // metabolism // inferred from electronic annotation	---	IPR002198 // Short-chain dehydrogenase/reductase SDR // 7.8E-77
13558	154757_at	0.537846	1.96489	5.15649	1.32e-05	7.44e-05	2.35783	FBgn0035498	CG14991	Fit1	Fermitin 1	38488	50839 // cell adhesion molecule binding // inferred from sequence or structural similarity /// 5515 // protein binding // inferred from physical interaction /// 5488 // binding // inferred from electronic annotation /// 5515 // protein binding // inferred from electronic annotation /// 50839 // cell adhesion molecule binding // inferred from sequence similarity	7160 // cell-matrix adhesion // inferred from sequence or structural similarity /// 7155 // cell adhesion // inferred from electronic annotation /// 7160 // cell-matrix adhesion // inferred from sequence similarity	5737 // cytoplasm // inferred from sequence or structural similarity /// 5856 // cytoskeleton // inferred from electronic annotation /// 5737 // cytoplasm // inferred from sequence similarity	IPR001849 // Pleckstrin-like // 4.9E-15
13661	154860_at	0.537665	3.05111	9.353	1.34e-10	2.3e-09	13.9124	FBgn0020249	CG7954	stck	steamer duck	40999	5200 // structural constituent of cytoskeleton // inferred from electronic annotation /// 8270 // zinc ion binding // inferred from electronic annotation /// 46872 // metal ion binding // inferred from electronic annotation	6928 // cell motility // inferred from electronic annotation /// 7010 // cytoskeleton organization and biogenesis // inferred from electronic annotation /// 7475 // apposition of dorsal and ventral wing surfaces // inferred from mutant phenotype	---	IPR001781 // Zn-binding protein, LIM // 2.8E-20 /// IPR001781 // Zn-binding protein, LIM // 1.3E-11 /// IPR001781 // Zn-binding protein, LIM // 1.9E-9 /// IPR001781 // Zn-binding protein, LIM // 8.0E-22 /// IPR001781 // Zn-binding protein, LIM // 4.8E-19 /// IPR001781 // Zn-binding protein, LIM // 2.8E-20 /// IPR001781 // Zn-binding protein, LIM // 1.3E-11 /// IPR001781 // Zn-binding protein, LIM…
12941	154140_at	0.536796	1.29691	7.89068	5.96e-09	6.92e-08	10.0815	FBgn0032342	CG4713	CG4713	CG4713	34543	---	---	---	IPR000008 // C2 domain // 1.5E-4
6121	147320_at	0.536497	0.122517	5.42526	6.07e-06	3.68e-05	3.13002	FBgn0034143	CG8303	CG8303	CG8303	36858	16491 // oxidoreductase activity // inferred from electronic annotation	---	---	IPR004262 // Male sterility protein // 3.3E-92
13162	154361_at	0.53552	2.25006	5.59716	3.7e-06	2.37e-05	3.62459	FBgn0042185	CG18769	CG18769	CG18769	59223	---	---	---	IPR006769 // Protein of unknown function DUF607 // 1.0E-126 /// IPR006769 // Protein of unknown function DUF607 // 1.0E-126
11345	152544_at	0.534353	2.19483	6.5992	2.11e-07	1.75e-06	6.49346	FBgn0031985	CG31756	CG8683	CG8683	326157	---	---	---	---
1788	142987_at	0.533855	1.18159	7.35509	2.56e-08	2.59e-07	8.61372	FBgn0053548	CG33548	msta	msta	31200	---	---	---	IPR001214 // Nuclear protein SET // 4.2E-27 /// IPR001214 // Nuclear protein SET // 2.0E-5
1964	143163_at	0.533447	0.323209	9.11119	2.47e-10	3.98e-09	13.2978	FBgn0000715	CG2346	Fmrf	FMRFamide-related	36030	5179 // hormone activity // non-traceable author statement /// 5184 // neuropeptide hormone activity // non-traceable author statement /// 5184 // neuropeptide hormone activity // traceable author statement	6936 // muscle contraction // inferred from electronic annotation /// 7218 // neuropeptide signaling pathway // non-traceable author statement /// 7218 // neuropeptide signaling pathway // traceable author statement /// 45822 // negative regulation of heart contraction // inferred from direct assay /// 7218 // neuropeptide signaling pathway // inferred from electronic annotation	---	IPR002544 // FMRFamide-related peptide // 1.3 /// IPR002544 // FMRFamide-related peptide // 0.0037 /// IPR002544 // FMRFamide-related peptide // 0.0037 /// IPR002544 // FMRFamide-related peptide // 0.0037 /// IPR002544 // FMRFamide-related peptide // 0.0037 /// IPR002544 // FMRFamide-related peptide // 0.0037 /// IPR002544 // FMRFamide-related peptide // 0.0021 /// IPR002544 // FMRFamide-related …
11273	152472_at	0.533203	1.25858	8.37405	1.65e-09	2.17e-08	11.3775	FBgn0039056	CG6742	cenB1A	centaurin beta 1A	42735	4553 // hydrolase activity, hydrolyzing O-glycosyl compounds // inferred from electronic annotation /// 8060 // ARF GTPase activator activity // inferred from sequence or structural similarity /// 8060 // ARF GTPase activator activity // inferred from sequence similarity	5975 // carbohydrate metabolism // inferred from electronic annotation /// 7010 // cytoskeleton organization and biogenesis // inferred from electronic annotation /// 7155 // cell adhesion // inferred from electronic annotation /// 7186 // G-protein coupled receptor protein signaling pathway // inferred from electronic annotation /// 43087 // regulation of GTPase activity // inferred from electro…	---	IPR001164 // Human Rev interacting-like protein (hRIP) // 1.1E-49 /// IPR002110 // Ankyrin // 8.2E-4 /// IPR002110 // Ankyrin // 0.035 /// IPR002110 // Ankyrin // 2.7 /// IPR001849 // Pleckstrin-like // 1.3E-21 /// IPR001164 // Human Rev interacting-like protein (hRIP) // 1.1E-49 /// IPR002110 // Ankyrin // 8.2E-4 /// IPR002110 // Ankyrin // 0.035 /// IPR002110 // Ankyrin // 2.7 /// IPR001849 // …
12279	153478_at	0.53301	2.56325	8.08891	3.51e-09	4.31e-08	10.6164	FBgn0027363	CG6521	Stam	Signal transducing adaptor molecule	34505	5102 // receptor binding // inferred from electronic annotation /// 8268 // receptor signaling protein tyrosine kinase signaling protein activity // inferred from sequence or structural similarity /// 8269 // JAK pathway signal transduction adaptor activity // non-traceable author statement /// 5515 // protein binding // inferred from physical interaction /// 8268 // receptor signaling protein ty…	6886 // intracellular protein transport // inferred from electronic annotation /// 7259 // JAK-STAT cascade // non-traceable author statement /// 7269 // neurotransmitter secretion // non-traceable author statement /// 46425 // regulation of JAK-STAT cascade // traceable author statement /// 48488 // synaptic vesicle endocytosis // non-traceable author statement	---	IPR001452 // SH3 // 1.0E-20 /// IPR002014 // VHS // 7.0E-42 /// IPR003903 // Ubiquitin interacting motif // 2.9E-4
10419	151618_at	0.532079	2.51763	6.61798	2e-07	1.67e-06	6.54673	FBgn0040395	CG3981	Unc-76	Unc-76	31179	5198 // structural molecule activity // inferred from electronic annotation /// 19894 // kinesin binding // inferred from direct assay	8088 // axon cargo transport // inferred from mutant phenotype /// 19226 // transmission of nerve impulse // inferred from electronic annotation	5874 // microtubule // inferred from electronic annotation /// 15630 // microtubule cytoskeleton // inferred from electronic annotation	---
12580	153779_at	0.531843	3.04615	6.13954	7.78e-07	5.82e-06	5.18274	FBgn0000368	CG6383	crb	crumbs	42896	4872 // receptor activity // inferred from electronic annotation /// 5102 // receptor binding // inferred from electronic annotation /// 5198 // structural molecule activity // inferred from electronic annotation /// 5509 // calcium ion binding // inferred from electronic annotation /// 5515 // protein binding // inferred from sequence or structural similarity /// 30507 // spectrin binding // tra…	1738 // morphogenesis of a polarized epithelium // traceable author statement /// 2009 // morphogenesis of an epithelium // non-traceable author statement /// 2009 // morphogenesis of an epithelium // traceable author statement /// 7043 // intercellular junction assembly // non-traceable author statement /// 7163 // establishment and/or maintenance of cell polarity // inferred from mutant phenoty…	5886 // plasma membrane // inferred from direct assay /// 5886 // plasma membrane // inferred from sequence or structural similarity /// 5913 // cell-cell adherens junction // non-traceable author statement /// 5918 // septate junction // traceable author statement /// 16021 // integral to membrane // non-traceable author statement /// 16021 // integral to membrane // traceable author statement /…	IPR001791 // Laminin G // 1.5E-46 /// IPR001791 // Laminin G // 9.3E-42 /// IPR001791 // Laminin G // 2.0E-35 /// IPR006209 // EGF-like domain // 5.7E-9 /// IPR006209 // EGF-like domain // 6.1E-8 /// IPR006209 // EGF-like domain // 1.3E-9 /// IPR006209 // EGF-like domain // 1.5E-7 /// IPR006209 // EGF-like domain // 5.9E-8 /// IPR006209 // EGF-like domain // 1.6E-10 /// IPR006209 // EGF-like doma…
12989	154188_at	0.530003	1.26692	5.95151	1.33e-06	9.5e-06	4.64347	FBgn0030817	CG4991	CG4991	CG4991	32695	5279 // amino acid-polyamine transporter activity // inferred from electronic annotation	6865 // amino acid transport // inferred from electronic annotation	16020 // membrane // inferred from electronic annotation	IPR002422 // Amino acid/polyamine transporter II // 6.4E-68
10768	151967_at	0.529718	0.940192	6.88266	9.49e-08	8.46e-07	7.29447	FBgn0032287	CG6415	CG6415	CG6415	34474	4047 // aminomethyltransferase activity // inferred from sequence or structural similarity /// 4047 // aminomethyltransferase activity // inferred from electronic annotation /// 8483 // transaminase activity // inferred from electronic annotation /// 16740 // transferase activity // inferred from electronic annotation /// 4047 // aminomethyltransferase activity // inferred from sequence similarity	6546 // glycine catabolism // inferred from sequence or structural similarity /// 6546 // glycine catabolism // inferred from electronic annotation /// 6546 // glycine catabolism // inferred from sequence similarity	5960 // glycine cleavage complex // inferred from sequence or structural similarity /// 5737 // cytoplasm // inferred from electronic annotation /// 5960 // glycine cleavage complex // inferred from sequence similarity	IPR006222 // Glycine cleavage T protein (aminomethyl transferase) // 2.9E-117
1233	142432_at	0.529347	0.557432	4.47381	9.39e-05	0.000422423	0.416473	FBgn0032377	CG14937	CG14937	CG14937	34591	5515 // protein binding // inferred from physical interaction	---	---	IPR001810 // Cyclin-like F-box // 1.3E-4
3057	144256_at	0.528584	0.998109	5.67007	3e-06	1.95e-05	3.8344	FBgn0028841	CG17330	jhamt	juvenile hormone acid methyltransferase	34977	8757 // S-adenosylmethionine-dependent methyltransferase activity // inferred from electronic annotation /// 35049 // juvenile hormone acid methyltransferase activity // inferred from direct assay /// 35049 // juvenile hormone acid methyltransferase activity // non-traceable author statement /// 8168 // methyltransferase activity // inferred from electronic annotation /// 16740 // transferase act…	6718 // juvenile hormone biosynthesis // inferred from direct assay /// 6718 // juvenile hormone biosynthesis // non-traceable author statement	---	---
11194	152393_at	0.528488	3.61615	6.09154	8.93e-07	6.61e-06	5.04521	FBgn0030593	CG9512	CG9512	CG9512	32419	8812 // choline dehydrogenase activity // inferred from sequence or structural similarity /// 50660 // FAD binding // inferred from electronic annotation /// 16491 // oxidoreductase activity // inferred from electronic annotation /// 16614 // oxidoreductase activity, acting on CH-OH group of donors // inferred from electronic annotation /// 8812 // choline dehydrogenase activity // inferred from …	6118 // electron transport // inferred from electronic annotation /// 6066 // alcohol metabolism // inferred from electronic annotation	---	IPR000172 // Glucose-methanol-choline oxidoreductase // 9.6E-85 /// IPR007867 // GMC oxidoreductase // 9.8E-48
13006	154205_at	0.528269	1.3793	7.09048	5.32e-08	5.02e-07	7.8774	FBgn0039141	CG5977	spas	spastin	42846	166 // nucleotide binding // inferred from electronic annotation /// 5524 // ATP binding // inferred from electronic annotation /// 16887 // ATPase activity // inferred from sequence or structural similarity /// 17111 // nucleoside-triphosphatase activity // inferred from electronic annotation /// 16887 // ATPase activity // inferred from sequence similarity	226 // microtubule cytoskeleton organization and biogenesis // inferred from mutant phenotype /// 6886 // intracellular protein transport // inferred from electronic annotation /// 7626 // locomotory behavior // inferred from mutant phenotype /// 19226 // transmission of nerve impulse // traceable author statement /// 31117 // positive regulation of microtubule depolymerization // inferred from m…	---	IPR007330 // MIT // 5.2E-8 /// IPR003959 // AAA ATPase, central region // 4.6E-76
6233	147432_at	0.52624	3.7425	3.23747	0.00284104	0.00797816	-2.89416	FBgn0034330	CG18107	CG18107	CG18107	37101	---	---	---	---
11615	152814_at	0.526179	3.99265	5.09046	1.6e-05	8.84e-05	2.16851	FBgn0014020	CG8416	Rho1	Rho1	36775	3924 // GTPase activity // inferred from sequence or structural similarity /// 3924 // GTPase activity // non-traceable author statement /// 3924 // GTPase activity // traceable author statement /// 5515 // protein binding // inferred from physical interaction /// 5525 // GTP binding // inferred from electronic annotation /// 166 // nucleotide binding // inferred from electronic annotation /// 39…	910 // cytokinesis // inferred from mutant phenotype /// 1736 // establishment of planar polarity // non-traceable author statement /// 1736 // establishment of planar polarity // traceable author statement /// 1737 // establishment of wing hair orientation // traceable author statement /// 6897 // endocytosis // inferred from mutant phenotype /// 7010 // cytoskeleton organization and biogenesis …	5622 // intracellular // inferred from electronic annotation /// 16020 // membrane // inferred from electronic annotation	IPR001806 // Ras GTPase superfamily // 2.3E-97
5768	146967_s_at	0.525694	5.40777	5.36842	7.16e-06	4.26e-05	2.96657	FBgn0033555 /// FBgn0010198 /// FBgn0068057	CG2033 /// CG12324	RpS15Ab /// RpS15Aa /// DyakRpS15Aa	Ribosomal protein S15Ab /// Ribosomal protein S15Aa /// RpS15Aa	36142 /// 44150	3676 // nucleic acid binding // inferred from electronic annotation /// 3735 // structural constituent of ribosome // inferred from sequence or structural similarity /// 3735 // structural constituent of ribosome // non-traceable author statement /// 3735 // structural constituent of ribosome // inferred from electronic annotation /// 3735 // structural constituent of ribosome // inferred from se…	6412 // protein biosynthesis // inferred from electronic annotation /// 6412 // protein biosynthesis // inferred from sequence or structural similarity /// 6412 // protein biosynthesis // inferred from sequence similarity	5843 // cytosolic small ribosomal subunit (sensu Eukaryota) // inferred from sequence or structural similarity /// 5840 // ribosome // non-traceable author statement /// 5622 // intracellular // inferred from electronic annotation /// 5840 // ribosome // inferred from electronic annotation /// 30529 // ribonucleoprotein complex // inferred from electronic annotation /// 5843 // cytosolic small ri…	IPR000630 // Ribosomal protein S8 // 5.0E-60 /// IPR000630 // Ribosomal protein S8 // 7.2E-60
7460	148659_at	0.525316	1.59183	4.75199	4.23e-05	0.00020842	1.20244	FBgn0036285	CG10704	toe	twin of eyg	39418	3700 // transcription factor activity // inferred from sequence or structural similarity /// 5515 // protein binding // inferred from physical interaction /// 3677 // DNA binding // inferred from electronic annotation /// 3700 // transcription factor activity // inferred from electronic annotation /// 43565 // sequence-specific DNA binding // inferred from electronic annotation /// 3700 // transc…	6357 // regulation of transcription from RNA polymerase II promoter // inferred from electronic annotation /// 7398 // ectoderm development // inferred from electronic annotation /// 7399 // nervous system development // inferred from electronic annotation /// 8283 // cell proliferation // inferred from electronic annotation /// 45449 // regulation of transcription // inferred from sequence or st…	5634 // nucleus // inferred from sequence or structural similarity /// 5667 // transcription factor complex // inferred from sequence or structural similarity /// 5634 // nucleus // inferred from electronic annotation /// 5634 // nucleus // inferred from sequence similarity /// 5667 // transcription factor complex // inferred from sequence similarity	IPR001523 // Paired box protein, N-terminal // 2.3E-36 /// IPR001356 // Homeobox // 3.9E-32
13272	154471_at	0.525253	2.82022	6.14809	7.59e-07	5.7e-06	5.20722	FBgn0026192	CG5884	par-6	par-6	32752	5198 // structural molecule activity // inferred from electronic annotation /// 5515 // protein binding // inferred from sequence or structural similarity /// 5515 // protein binding // inferred from physical interaction /// 5515 // protein binding // inferred from electronic annotation /// 5515 // protein binding // inferred from sequence similarity	1738 // morphogenesis of a polarized epithelium // traceable author statement /// 6605 // protein targeting // inferred from electronic annotation /// 7155 // cell adhesion // inferred from mutant phenotype /// 7298 // border follicle cell migration (sensu Insecta) // inferred from mutant phenotype /// 7309 // oocyte axis determination // traceable author statement /// 7416 // synaptogenesis // i…	5737 // cytoplasm // non-traceable author statement /// 5938 // cell cortex // traceable author statement /// 16324 // apical plasma membrane // traceable author statement /// 35003 // subapical complex // traceable author statement /// 45179 // apical cortex // non-traceable author statement	IPR001478 // PDZ/DHR/GLGF domain // 2.2E-12 /// IPR000270 // Octicosapeptide/Phox/Bem1p // 5.3E-15
5304	146503_at	0.524909	2.93795	6.31675	4.69e-07	3.67e-06	5.68951	FBgn0041180	CG10363	TepIV	Thiolester containing protein IV	35248	4866 // endopeptidase inhibitor activity // inferred from electronic annotation /// 5351 // sugar porter activity // inferred from electronic annotation /// 30414 // protease inhibitor activity // inferred from sequence or structural similarity /// 30414 // protease inhibitor activity // inferred from sequence similarity	6961 // antibacterial humoral response (sensu Protostomia) // inferred from direct assay /// 9401 // phosphoenolpyruvate-dependent sugar phosphotransferase system // inferred from electronic annotation	---	IPR001599 // Alpha-2-macroglobulin // 1.4E-100 /// IPR002890 // Alpha-2-macroglobulin, N-terminal // 1.9E-16 /// IPR002890 // Alpha-2-macroglobulin, N-terminal // 7.5E-11 /// IPR002890 // Alpha-2-macroglobulin, N-terminal // 3.1E-9
1822	143021_at	0.524906	0.188379	5.39638	6.6e-06	3.96e-05	3.04696	FBgn0051150	CG31150	CG31150	CG31150	41921	5319 // lipid transporter activity // inferred from electronic annotation /// 5515 // protein binding // inferred from physical interaction	6869 // lipid transport // inferred from electronic annotation	---	IPR001747 // Lipid transport protein, N-terminal // 1.4E-10 /// IPR001747 // Lipid transport protein, N-terminal // 1.6E-6
12951	154150_at	0.524563	4.67215	5.01473	1.99e-05	0.000107134	1.95168	FBgn0001124	CG8430	Got1	Glutamate oxaloacetate transaminase 1	36782	4069 // aspartate transaminase activity // inferred from direct assay /// 4069 // aspartate transaminase activity // inferred from sequence or structural similarity /// 8483 // transaminase activity // inferred from electronic annotation /// 16740 // transferase activity // inferred from electronic annotation /// 16769 // transferase activity, transferring nitrogenous groups // inferred from elec…	6531 // aspartate metabolism // inferred from sequence or structural similarity /// 6537 // glutamate biosynthesis // traceable author statement /// 6520 // amino acid metabolism // inferred from electronic annotation /// 9058 // biosynthesis // inferred from electronic annotation /// 6531 // aspartate metabolism // inferred from sequence similarity	5759 // mitochondrial matrix // inferred from sequence or structural similarity /// 5759 // mitochondrial matrix // inferred from sequence similarity	IPR004839 // Aminotransferase, class I and II // 2.1E-90 /// IPR004839 // Aminotransferase, class I and II // 2.1E-90
11966	153165_at	0.524267	2.09875	3.7212	0.00077542	0.00262787	-1.64603	FBgn0035533	CG15015	Cip4	Cip4	38534	5515 // protein binding // inferred from sequence or structural similarity /// 17048 // Rho GTPase binding // inferred from sequence or structural similarity /// 5515 // protein binding // inferred from sequence similarity /// 17048 // Rho GTPase binding // inferred from sequence similarity	7049 // cell cycle // inferred from electronic annotation /// 7165 // signal transduction // inferred from sequence or structural similarity /// 7498 // mesoderm development // inferred from expression pattern /// 30036 // actin cytoskeleton organization and biogenesis // inferred from sequence or structural similarity /// 7165 // signal transduction // inferred from sequence similarity /// 30036…	---	IPR001452 // SH3 // 6.6E-12 /// IPR001060 // Cdc15/Fes/CIP4 // 2.5E-20
1344	142543_at	0.523121	1.58862	5.03465	1.88e-05	0.000101975	2.00869	FBgn0042110	CG18765	CG18765	CG18765	59149	---	---	---	IPR004119 // Protein of unknown function DUF227 // 2.3E-5
1755	142954_at	0.52252	2.51996	5.09728	1.57e-05	8.69e-05	2.18804	FBgn0034290	CG5773	CG5773	CG5773	37053	---	---	---	---
402	141601_at	0.52205	1.36853	10.671	5.58e-12	1.42e-10	17.1273	FBgn0034029	CG8190	eIF2B-	eIF2B-	36722	3743 // translation initiation factor activity // inferred from sequence or structural similarity /// 5085 // guanyl-nucleotide exchange factor activity // inferred from sequence or structural similarity /// 16779 // nucleotidyltransferase activity // inferred from electronic annotation /// 3743 // translation initiation factor activity // inferred from electronic annotation /// 3743 // translati…	6413 // translational initiation // inferred from sequence or structural similarity /// 9058 // biosynthesis // inferred from electronic annotation /// 6413 // translational initiation // inferred from sequence similarity	5829 // cytosol // inferred from sequence or structural similarity /// 5829 // cytosol // non-traceable author statement /// 5851 // eukaryotic translation initiation factor 2B complex // inferred from sequence or structural similarity /// 5851 // eukaryotic translation initiation factor 2B complex // non-traceable author statement /// 5829 // cytosol // inferred from sequence similarity /// 5851…	IPR005835 // Nucleotidyl transferase // 1.3E-7
2711	143910_at	0.521608	2.24751	5.57111	3.99e-06	2.53e-05	3.54964	FBgn0020224	CG7037	Cbl	Cbl	38961	4842 // ubiquitin-protein ligase activity // inferred from electronic annotation /// 4871 // signal transducer activity // inferred from electronic annotation /// 8270 // zinc ion binding // inferred from electronic annotation /// 16874 // ligase activity // inferred from electronic annotation /// 16874 // ligase activity // traceable author statement /// 5509 // calcium ion binding // inferred f…	6508 // proteolysis // traceable author statement /// 6968 // cellular defense response // inferred from electronic annotation /// 7173 // epidermal growth factor receptor signaling pathway // traceable author statement /// 7175 // negative regulation of epidermal growth factor receptor activity // inferred from mutant phenotype /// 7175 // negative regulation of epidermal growth factor receptor …	151 // ubiquitin ligase complex // inferred from electronic annotation /// 5634 // nucleus // inferred from electronic annotation	IPR003153 // Adaptor protein Cbl, N-terminal // 2.2E-106 /// IPR003153 // Adaptor protein Cbl, N-terminal // 2.0E-70 /// IPR001841 // Zn-finger, RING // 1.5E-15 /// IPR003153 // Adaptor protein Cbl, N-terminal // 8.8E-67
8135	149334_at	0.521153	5.00621	6.98783	7.07e-08	6.48e-07	7.58995	FBgn0037328	CG2099	RpL35A	Ribosomal protein L35A	40654	3676 // nucleic acid binding // inferred from electronic annotation /// 3735 // structural constituent of ribosome // inferred from sequence or structural similarity /// 3735 // structural constituent of ribosome // inferred from electronic annotation /// 3735 // structural constituent of ribosome // inferred from sequence similarity	6412 // protein biosynthesis // inferred from sequence or structural similarity /// 6412 // protein biosynthesis // inferred from electronic annotation /// 6412 // protein biosynthesis // inferred from sequence similarity	5842 // cytosolic large ribosomal subunit (sensu Eukaryota) // inferred from sequence or structural similarity /// 5622 // intracellular // inferred from electronic annotation /// 5840 // ribosome // inferred from electronic annotation /// 5842 // cytosolic large ribosomal subunit (sensu Eukaryota) // inferred from sequence similarity	IPR001780 // Ribosomal protein L35Ae // 1.3E-49
85	141284_at	0.521128	1.01429	6.66217	1.76e-07	1.49e-06	6.67194	FBgn0039039	CG4677	lmd	lame duck	42717	3700 // transcription factor activity // inferred from sequence or structural similarity /// 8270 // zinc ion binding // inferred from electronic annotation /// 3676 // nucleic acid binding // inferred from electronic annotation /// 46872 // metal ion binding // inferred from electronic annotation /// 3700 // transcription factor activity // inferred from sequence similarity	6355 // regulation of transcription, DNA-dependent // inferred from sequence or structural similarity /// 6357 // regulation of transcription from RNA polymerase II promoter // inferred from electronic annotation /// 7517 // muscle development // inferred from mutant phenotype /// 7517 // muscle development // traceable author statement /// 7519 // striated muscle development // inferred from mut…	5634 // nucleus // inferred from sequence or structural similarity /// 5634 // nucleus // inferred from electronic annotation /// 5634 // nucleus // inferred from sequence similarity	IPR007087 // Zn-finger, C2H2 type // 1.5E-6 /// IPR007087 // Zn-finger, C2H2 type // 7.1E-5 /// IPR007087 // Zn-finger, C2H2 type // 2.0E-5 /// IPR007087 // Zn-finger, C2H2 type // 1.5E-6 /// IPR007087 // Zn-finger, C2H2 type // 7.1E-5 /// IPR007087 // Zn-finger, C2H2 type // 2.0E-5
2783	143982_at	0.519739	2.13519	5.07432	1.67e-05	9.21e-05	2.12227	FBgn0013591	CG8103	Mi-2	Mi-2	---	16564 // transcriptional repressor activity // inferred from genetic interaction /// 5515 // protein binding // inferred from physical interaction /// 3682 // chromatin binding // inferred from sequence or structural similarity /// 4386 // helicase activity // inferred from sequence or structural similarity /// 3677 // DNA binding // inferred from direct assay /// 16887 // ATPase activity // infe…	6333 // chromatin assembly or disassembly // inferred from sequence or structural similarity /// 42766 // nucleosome mobilization // inferred from direct assay /// 6333 // chromatin assembly or disassembly // inferred from electronic annotation /// 6350 // transcription // inferred from electronic annotation /// 6355 // regulation of transcription, DNA-dependent // inferred from electronic annota…	5634 // nucleus // inferred from sequence or structural similarity /// 5700 // polytene chromosome // inferred from direct assay /// 785 // chromatin // inferred from electronic annotation /// 5634 // nucleus // inferred from electronic annotation /// 16581 // NuRD complex // traceable author statement	IPR009463 // Protein of unknown function DUF1087 // 4.4E-32 /// IPR000330 // SNF2 related domain // 6.0E-102 /// IPR001965 // Zn-finger-like, PHD finger // 3.7E-23 /// IPR001965 // Zn-finger-like, PHD finger // 1.5E-22 /// IPR000953 // Chromo // 1.2E-4 /// IPR001650 // Helicase, C-terminal // 7.0E-27 /// IPR009462 // Protein of unknown function DUF1086 // 3.3E-86 /// IPR009463 // Protein of unkno…
12413	153612_at	0.518607	1.67418	9.02142	3.1e-10	4.85e-09	13.0677	FBgn0036240	CG6928	CG6928	CG6928	39367	5215 // transporter activity // non-traceable author statement /// 15381 // high affinity sulfate permease activity // inferred from sequence or structural similarity /// 5215 // transporter activity // inferred from electronic annotation /// 15381 // high affinity sulfate permease activity // inferred from sequence similarity	6790 // sulfur metabolism // inferred from electronic annotation /// 6820 // anion transport // inferred from electronic annotation /// 6858 // extracellular transport // inferred from electronic annotation /// 6810 // transport // inferred from electronic annotation	16021 // integral to membrane // inferred from electronic annotation	IPR001902 // Sulphate transporter // 1.4E-17 /// IPR001902 // Sulphate transporter // 1.8E-39
10963	152162_at	0.518531	1.1261	7.52942	1.59e-08	1.68e-07	9.09491	FBgn0028523	CG5888	CG5888	CG5888	34980	4888 // transmembrane receptor activity // inferred from sequence or structural similarity /// 4888 // transmembrane receptor activity // inferred from sequence similarity	---	---	IPR001611 // Leucine-rich repeat // 0.093 /// IPR001611 // Leucine-rich repeat // 9.1E-4
12453	153652_at	0.518372	1.15677	6.37618	3.96e-07	3.13e-06	5.85908	FBgn0038129	CG8449	CG8449	CG8449	41628	5515 // protein binding // inferred from physical interaction	---	---	---
7325	148524_at	0.517933	0.215727	5.36279	7.27e-06	4.32e-05	2.95036	---	---	---	---	---	---	---	---	---
13121	154320_at	0.516676	1.36085	4.72191	4.62e-05	0.000224938	1.11705	FBgn0001291	CG2275	Jra	Jun-related antigen	36057	3677 // DNA binding // inferred from electronic annotation /// 3700 // transcription factor activity // inferred from electronic annotation /// 3702 // RNA polymerase II transcription factor activity // inferred from sequence or structural similarity /// 3704 // specific RNA polymerase II transcription factor activity // non-traceable author statement /// 5515 // protein binding // inferred from …	165 // MAPKKK cascade // traceable author statement /// 1736 // establishment of planar polarity // non-traceable author statement /// 6357 // regulation of transcription from RNA polymerase II promoter // non-traceable author statement /// 7254 // JNK cascade // inferred from genetic interaction /// 7254 // JNK cascade // inferred from mutant phenotype /// 7254 // JNK cascade // traceable author…	5634 // nucleus // inferred from direct assay /// 5634 // nucleus // inferred from sequence or structural similarity /// 5634 // nucleus // non-traceable author statement /// 5737 // cytoplasm // inferred from direct assay /// 5634 // nucleus // inferred from electronic annotation /// 5634 // nucleus // inferred from sequence similarity	IPR004827 // Basic-leucine zipper (bZIP) transcription factor // 8.7E-26 /// IPR005643 // Jun-like transcription factor // 9.6E-107
10310	151509_at	0.516465	1.59561	7.53534	1.56e-08	1.66e-07	9.11118	FBgn0004607	---	zfh2	Zn finger homeodomain 2	43795	3677 // DNA binding // non-traceable author statement /// 3677 // DNA binding // traceable author statement /// 3700 // transcription factor activity // inferred from electronic annotation /// 3702 // RNA polymerase II transcription factor activity // inferred from sequence or structural similarity /// 3729 // mRNA binding // inferred from electronic annotation /// 8270 // zinc ion binding // inf…	6357 // regulation of transcription from RNA polymerase II promoter // inferred from electronic annotation /// 7398 // ectoderm development // inferred from electronic annotation /// 7399 // nervous system development // inferred from expression pattern /// 7417 // central nervous system development // non-traceable author statement /// 7476 // wing morphogenesis // inferred from mutant phenotype…	5634 // nucleus // inferred from sequence or structural similarity /// 5634 // nucleus // non-traceable author statement /// 5634 // nucleus // inferred from electronic annotation /// 5634 // nucleus // inferred from sequence similarity	---
[truncated: 1,606 more rows]
