# Supplementary material for: Gene expression changes in response to aging compared to heat stress, oxidative stress and ionizing radiation in Drosophila melanogaster
Source: Aging (Albany NY). 2012 Nov 30;4(11):768–89. doi: 10.18632/aging.100499 (PMC3560439; doi:10.18632/aging.100499)
Supplement: Supplementary file 6 [file aging-04-768-s006.xlsx]

## Sheet: TableS4b.Agedown
Table S4b. Age down
index	ID	M	A	t	P.Value	adj.P.Val	B	FlyBase	Ensembl	Gene.Symbol	Gene.Title	Entrez.Gene	Gene.Ontology.Molecular.Function	Gene.Ontology.Biological.Process	Gene.Ontology.Cellular.Component	InterPro
5919	147118_at	-4.72932	3.41103	-35.3529	6.86e-27	4.81e-23	50.9315	FBgn0033774	CG12374	CG12374	CG12374	36410	4182 // carboxypeptidase A activity // inferred from sequence or structural similarity /// 5515 // protein binding // inferred from physical interaction /// 4180 // carboxypeptidase activity // inferred from electronic annotation /// 4182 // carboxypeptidase A activity // inferred from electronic annotation /// 4182 // carboxypeptidase A activity // inferred from sequence similarity	6508 // proteolysis // inferred from electronic annotation	---	IPR000834 // Peptidase M14, carboxypeptidase A // 4.3E-52
7261	148460_at	-3.2854	3.37033	-33.4624	3.7e-26	1.73e-22	49.3606	FBgn0035982	CG4461	CG4461	CG4461	39074	5515 // protein binding // inferred from physical interaction	9408 // response to heat // inferred from sequence or structural similarity /// 9408 // response to heat // inferred from sequence similarity	---	IPR002068 // Heat shock protein Hsp20 // 5.1E-26
9983	151182_at	-2.96447	2.14587	-32.6227	8.06e-26	2.82e-22	48.6304	FBgn0040705	CG15434	CG15434	CG15434	50178	3954 // NADH dehydrogenase activity // inferred from sequence or structural similarity /// 3954 // NADH dehydrogenase activity // inferred from sequence similarity	6120 // mitochondrial electron transport, NADH to ubiquinone // inferred from sequence or structural similarity /// 6120 // mitochondrial electron transport, NADH to ubiquinone // inferred from sequence similarity	5747 // respiratory chain complex I (sensu Eukaryota) // inferred from sequence or structural similarity /// 5747 // respiratory chain complex I (sensu Eukaryota) // inferred from sequence similarity	IPR007741 // Mitochondrial ribosome // 9.7E-23
7678	148877_at	-3.92532	3.70979	-31.8774	1.63e-25	3.81e-22	47.9646	FBgn0042201 /// FBgn0068114	CG13061	Nplp3 /// DyakNplp3	Neuropeptide-like precursor 3 /// Nplp3	59235	5184 // neuropeptide hormone activity // non-traceable author statement	7218 // neuropeptide signaling pathway // non-traceable author statement /// 7218 // neuropeptide signaling pathway // inferred from electronic annotation	5576 // extracellular region // non-traceable author statement	---
10756	151955_at	-2.12059	1.86632	-30.8686	4.35e-25	8.71e-22	47.0356	FBgn0000165	CG5779	Bc	Black cells	37044	4503 // monophenol monooxygenase activity // inferred from sequence or structural similarity /// 4503 // monophenol monooxygenase activity // non-traceable author statement /// 4503 // monophenol monooxygenase activity // traceable author statement /// 5344 // oxygen transporter activity // inferred from electronic annotation /// 4503 // monophenol monooxygenase activity // inferred from electron…	6810 // transport // inferred from electronic annotation /// 6952 // defense response // non-traceable author statement /// 9611 // response to wounding // inferred from mutant phenotype /// 9613 // response to pest, pathogen or parasite // inferred from mutant phenotype /// 35006 // melanization defense response // inferred from genetic interaction /// 35006 // melanization defense response // i…	---	IPR000896 // Arthropod hemocyanin/insect LSP // 2.2E-74 /// IPR005204 // Hemocyanin, N-terminal // 1.5E-6 /// IPR005203 // Hemocyanin, C-terminal // 8.0E-52
10727	151926_at	-2.60318	3.83911	-30.3572	7.24e-25	1.27e-21	46.5519	FBgn0039348	CG4673	CG4673	CG4673	43091	17056 // structural constituent of nuclear pore // inferred from sequence or structural similarity /// 8270 // zinc ion binding // inferred from electronic annotation /// 17056 // structural constituent of nuclear pore // inferred from sequence similarity	6605 // protein targeting // inferred from electronic annotation	5643 // nuclear pore // inferred from sequence or structural similarity /// 5643 // nuclear pore // inferred from sequence similarity	IPR007716 // NPL4, putative zinc binding // 2.0E-125 /// IPR007717 // NPL4 // 1.0E-126 /// IPR007716 // NPL4, putative zinc binding // 2.0E-125 /// IPR007717 // NPL4 // 1.0E-126
1021	142220_at	-2.39529	1.44348	-29.29	2.15e-24	3.35e-21	45.5136	FBgn0033367	CG8193	CG8193	CG8193	35910	4503 // monophenol monooxygenase activity // inferred from sequence or structural similarity /// 4503 // monophenol monooxygenase activity // non-traceable author statement /// 5344 // oxygen transporter activity // inferred from electronic annotation /// 4497 // monooxygenase activity // inferred from electronic annotation /// 4503 // monophenol monooxygenase activity // inferred from electronic…	6810 // transport // inferred from electronic annotation /// 6952 // defense response // non-traceable author statement /// 8152 // metabolism // inferred from electronic annotation /// 6583 // melanin biosynthesis from tyrosine // inferred from sequence or structural similarity /// 6952 // defense response // inferred from sequence or structural similarity /// 6583 // melanin biosynthesis from t…	5576 // extracellular region // inferred from direct assay	IPR000896 // Arthropod hemocyanin/insect LSP // 2.7E-80 /// IPR005204 // Hemocyanin, N-terminal // 5.3E-11 /// IPR005203 // Hemocyanin, C-terminal // 1.4E-57
227	141426_at	-3.03719	2.25709	-28.4022	5.47e-24	7.66e-21	44.6185	FBgn0036996	CG5932	CG5932	CG5932	40267	4806 // triacylglycerol lipase activity // inferred from sequence or structural similarity /// 3824 // catalytic activity // inferred from electronic annotation /// 16789 // carboxylic ester hydrolase activity // inferred from electronic annotation /// 4806 // triacylglycerol lipase activity // inferred from sequence similarity	6629 // lipid metabolism // inferred from electronic annotation /// 16042 // lipid catabolism // inferred from electronic annotation	---	IPR000073 // Alpha/beta hydrolase fold // 2.2E-14 /// IPR006693 // Ab-hydrolase associated lipase region // 1.1E-21
7161	148360_at	-2.39961	3.88018	-28.2907	6.16e-24	7.85e-21	44.504	FBgn0035817	CG7409	CG7409	CG7409	38870	51082 // unfolded protein binding // inferred from sequence or structural similarity /// 5515 // protein binding // inferred from physical interaction /// 51082 // unfolded protein binding // inferred from sequence similarity	6457 // protein folding // inferred from electronic annotation /// 6457 // protein folding // inferred from sequence or structural similarity /// 6950 // response to stress // inferred from electronic annotation /// 6952 // defense response // inferred from electronic annotation /// 6457 // protein folding // inferred from sequence similarity	---	IPR002068 // Heat shock protein Hsp20 // 2.9E-17
11411	152610_at	-2.42545	2.46604	-27.5128	1.43e-23	1.43e-20	43.6917	FBgn0040074 /// FBgn0053060 /// FBgn0053061	CG13057	retinin /// CG33060 /// CG33061	retinin /// CG33060 /// CG33061	318838 /// 39807 /// 53564	---	---	---	IPR007614 // Retinin-like protein // 1.7E-33
11830	153029_at	-2.84744	2.29889	-27.5586	1.36e-23	1.43e-20	43.7402	FBgn0005633	CG7445	fln	flightin	40185	---	30241 // muscle thick filament assembly // inferred from mutant phenotype	5863 // striated muscle thick filament // inferred from direct assay /// 30016 // myofibril // inferred from direct assay /// 43292 // contractile fiber // non-traceable author statement	---
1203	142402_at	-2.41795	1.5392	-27.2943	1.82e-23	1.7e-20	43.4592	FBgn0037678	CG16749	CG16749	CG16749	41111	4252 // serine-type endopeptidase activity // inferred from sequence or structural similarity /// 4252 // serine-type endopeptidase activity // non-traceable author statement /// 4263 // chymotrypsin activity // inferred from electronic annotation /// 4295 // trypsin activity // inferred from electronic annotation /// 4252 // serine-type endopeptidase activity // inferred from electronic annotati…	6508 // proteolysis // non-traceable author statement /// 6508 // proteolysis // inferred from electronic annotation	---	IPR001254 // Peptidase S1, chymotrypsin // 5.2E-67
7133	148332_at	-2.32573	1.67366	-26.9443	2.69e-23	2.36e-20	43.0827	FBgn0035779	CG8562	CG8562	CG8562	38828	4181 // metallocarboxypeptidase activity // inferred from sequence or structural similarity /// 4182 // carboxypeptidase A activity // inferred from electronic annotation /// 4181 // metallocarboxypeptidase activity // inferred from sequence similarity	6508 // proteolysis // inferred from electronic annotation	---	IPR000834 // Peptidase M14, carboxypeptidase A // 1.1E-66
8108	149307_at	-1.26003	1.96166	-26.6694	3.67e-23	2.86e-20	42.7835	FBgn0037292	CG2022	CG2022	CG2022	40615	5057 // receptor signaling protein activity // inferred from electronic annotation	---	5778 // peroxisomal membrane // inferred from sequence or structural similarity /// 16021 // integral to membrane // inferred from electronic annotation /// 5778 // peroxisomal membrane // inferred from sequence similarity	IPR007248 // Mpv17/PMP22 // 5.4E-46
3669	144868_at	-1.30831	2.09821	-25.2424	1.92e-22	1.28e-19	41.1772	FBgn0030292	CG11752	CG11752	CG11752	32076	---	---	---	---
5388	146587_at	-3.15612	2.22396	-24.4362	5.08e-22	3.09e-19	40.2286	FBgn0032947	CG17571	CG17571	CG17571	35409	4252 // serine-type endopeptidase activity // inferred from sequence or structural similarity /// 4263 // chymotrypsin activity // inferred from electronic annotation /// 4295 // trypsin activity // non-traceable author statement /// 4252 // serine-type endopeptidase activity // inferred from sequence similarity	6508 // proteolysis // non-traceable author statement	---	IPR001254 // Peptidase S1, chymotrypsin // 3.6E-83
1384	142583_at	-2.43814	2.86597	-24.2176	6.64e-22	3.88e-19	39.9661	FBgn0034497	CG9090	CG9090	CG9090	37297	5386 // carrier activity // inferred from sequence or structural similarity /// 5488 // binding // inferred from electronic annotation /// 15114 // phosphate transporter activity // inferred from sequence or structural similarity /// 5515 // protein binding // inferred from physical interaction /// 5386 // carrier activity // inferred from sequence similarity /// 15114 // phosphate transporter ac…	6796 // phosphate metabolism // inferred from electronic annotation /// 6817 // phosphate transport // inferred from sequence or structural similarity /// 6810 // transport // inferred from electronic annotation /// 6817 // phosphate transport // inferred from sequence similarity	5740 // mitochondrial envelope // inferred from sequence or structural similarity /// 5743 // mitochondrial inner membrane // inferred from electronic annotation /// 16020 // membrane // inferred from electronic annotation /// 16021 // integral to membrane // inferred from electronic annotation /// 5740 // mitochondrial envelope // inferred from sequence similarity	IPR001993 // Mitochondrial substrate carrier // 4.1E-28 /// IPR001993 // Mitochondrial substrate carrier // 1.4E-24 /// IPR001993 // Mitochondrial substrate carrier // 1.3E-10
9170	150369_at	-2.32098	1.98564	-23.8472	1.05e-21	5.67e-19	39.5156	FBgn0038973	CG18594	CG18594	CG18594	42644	19207 // kinase regulator activity // inferred from electronic annotation /// 19210 // kinase inhibitor activity // inferred from electronic annotation /// 5515 // protein binding // inferred from physical interaction	7165 // signal transduction // inferred from electronic annotation	---	IPR008914 // PEBP // 1.9E-57
11650	152849_at	-1.91212	1.33379	-23.8754	1.02e-21	5.67e-19	39.5502	FBgn0040093	CG1656	lectin-46Ca	lectin-46Ca	53523	5529 // sugar binding // inferred from sequence or structural similarity /// 5534 // galactose binding // inferred from sequence or structural similarity /// 5529 // sugar binding // inferred from electronic annotation /// 5529 // sugar binding // inferred from sequence similarity /// 5534 // galactose binding // inferred from sequence similarity	---	---	IPR001304 // C-type lectin // 3.0E-11
7055	148254_at	-2.85176	1.21933	-22.99	3.13e-21	1.63e-18	38.4462	FBgn0035666	CG6580	Jon65Aii	Jonah 65Aii	38684	4252 // serine-type endopeptidase activity // inferred from sequence or structural similarity /// 4252 // serine-type endopeptidase activity // non-traceable author statement /// 4263 // chymotrypsin activity // inferred from electronic annotation /// 4295 // trypsin activity // inferred from electronic annotation /// 4252 // serine-type endopeptidase activity // inferred from sequence similarity	6508 // proteolysis // non-traceable author statement	---	IPR001254 // Peptidase S1, chymotrypsin // 8.7E-43
5953	147152_at	-2.0494	1.21922	-22.616	5.1e-21	2.55e-18	37.9672	FBgn0019928	CG4812	Ser8	Ser8	36489	4263 // chymotrypsin activity // inferred from electronic annotation /// 4295 // trypsin activity // inferred from sequence or structural similarity /// 4295 // trypsin activity // non-traceable author statement /// 8236 // serine-type peptidase activity // inferred from sequence or structural similarity /// 4252 // serine-type endopeptidase activity // inferred from electronic annotation /// 823…	6508 // proteolysis // non-traceable author statement /// 6508 // proteolysis // inferred from electronic annotation	---	IPR001254 // Peptidase S1, chymotrypsin // 2.4E-86
11567	152766_at	-1.85048	1.32725	-22.1057	1e-20	4.69e-18	37.3014	FBgn0002563	CG4178	Lsp1	Larval serum protein 1	33274	5344 // oxygen transporter activity // inferred from electronic annotation /// 45735 // nutrient reservoir activity // non-traceable author statement /// 45735 // nutrient reservoir activity // inferred from electronic annotation	6810 // transport // inferred from electronic annotation	5576 // extracellular region // non-traceable author statement /// 5616 // larval serum protein complex // inferred from direct assay	IPR000896 // Arthropod hemocyanin/insect LSP // 8.2E-98 /// IPR005204 // Hemocyanin, N-terminal // 8.4E-38 /// IPR005203 // Hemocyanin, C-terminal // 1.8E-109
2785	143984_at	-2.11111	3.24462	-21.8969	1.33e-20	6e-18	37.0247	FBgn0023415	CG4605	Acp32CD	Accessory gland-specific peptide 32CD	34531	5179 // hormone activity // non-traceable author statement	45434 // negative regulation of female receptivity, post-mating // non-traceable author statement /// 7610 // behavior // inferred from electronic annotation	5576 // extracellular region // traceable author statement	---
8474	149673_at	-1.06895	3.02704	-21.3977	2.63e-20	1.11e-17	36.3526	FBgn0037873	CG6666	CG6666	CG6666	41340	104 // succinate dehydrogenase activity // inferred from sequence or structural similarity /// 8177 // succinate dehydrogenase (ubiquinone) activity // inferred from sequence or structural similarity /// 104 // succinate dehydrogenase activity // inferred from electronic annotation /// 104 // succinate dehydrogenase activity // inferred from sequence similarity /// 8177 // succinate dehydrogenase…	6099 // tricarboxylic acid cycle // inferred from sequence or structural similarity /// 6105 // succinate metabolism // inferred from sequence or structural similarity /// 6121 // mitochondrial electron transport, succinate to ubiquinone // inferred from sequence or structural similarity /// 6099 // tricarboxylic acid cycle // inferred from electronic annotation /// 6118 // electron transport // …	5749 // respiratory chain complex II (sensu Eukaryota) // inferred from sequence or structural similarity /// 16020 // membrane // inferred from electronic annotation /// 5749 // respiratory chain complex II (sensu Eukaryota) // inferred from sequence similarity	IPR000701 // Succinate dehydrogenase, cytochrome b subunit // 5.5E-52
4620	145819_at	-1.88545	1.84159	-21.1549	3.68e-20	1.51e-17	36.0203	FBgn0031700	CG14022	CG14022	CG14022	33763	3998 // acylphosphatase activity // inferred from sequence or structural similarity /// 3998 // acylphosphatase activity // inferred from electronic annotation /// 3998 // acylphosphatase activity // inferred from sequence similarity	---	---	IPR001792 // Acylphosphatase // 9.4E-27
2961	144160_i_at	-1.09963	6.06697	-20.6287	7.71e-20	3e-17	35.2878	FBgn0011227	CG8764	ox	oxen	45401	8121 // ubiquinol-cytochrome-c reductase activity // inferred from sequence or structural similarity /// 8121 // ubiquinol-cytochrome-c reductase activity // non-traceable author statement /// 8121 // ubiquinol-cytochrome-c reductase activity // inferred from electronic annotation /// 8121 // ubiquinol-cytochrome-c reductase activity // inferred from sequence similarity	6122 // mitochondrial electron transport, ubiquinol to cytochrome c // inferred from sequence or structural similarity /// 7286 // spermatid development // inferred from mutant phenotype /// 6122 // mitochondrial electron transport, ubiquinol to cytochrome c // inferred from electronic annotation /// 6122 // mitochondrial electron transport, ubiquinol to cytochrome c // inferred from sequence sim…	5750 // respiratory chain complex III (sensu Eukaryota) // inferred from sequence or structural similarity /// 5750 // respiratory chain complex III (sensu Eukaryota) // non-traceable author statement /// 5740 // mitochondrial envelope // inferred from electronic annotation /// 5750 // respiratory chain complex III (sensu Eukaryota) // inferred from sequence similarity	IPR008027 // Ubiquinol-cytochrome C reductase, UQCRXQCR9 like // 2.3E-32 /// IPR008027 // Ubiquinol-cytochrome C reductase, UQCRXQCR9 like // 5.4E-33
11825	153024_at	-1.43981	4.82747	-20.0173	1.86e-19	6.52e-17	34.4144	FBgn0004551	CG3725	Ca-P60A	Calcium ATPase at 60A	49297	5388 // calcium-transporting ATPase activity // inferred from sequence or structural similarity /// 5388 // calcium-transporting ATPase activity // non-traceable author statement /// 5524 // ATP binding // inferred from electronic annotation /// 16820 // hydrolase activity, acting on acid anhydrides, catalyzing transmembrane movement of substances // inferred from electronic annotation /// 166 //…	6816 // calcium ion transport // non-traceable author statement /// 6874 // calcium ion homeostasis // inferred from electronic annotation /// 7274 // neuromuscular synaptic transmission // inferred from mutant phenotype /// 8152 // metabolism // inferred from electronic annotation /// 51282 // regulation of sequestering of calcium ion // inferred from mutant phenotype /// 6810 // transport // in…	5635 // nuclear envelope // inferred from direct assay /// 5783 // endoplasmic reticulum // inferred from direct assay /// 5783 // endoplasmic reticulum // inferred from sequence or structural similarity /// 5789 // endoplasmic reticulum membrane // non-traceable author statement /// 16021 // integral to membrane // non-traceable author statement /// 16529 // sarcoplasmic reticulum // non-traceab…	IPR006068 // Cation transporting ATPase, C-terminal // 8.1E-82 /// IPR008250 // E1-E2 ATPase-associated region // 1.5E-125 /// IPR005834 // Haloacid dehalogenase-like hydrolase // 5.3E-15 /// IPR004014 // Cation transporting ATPase, N-terminal // 3.9E-32
956	142155_at	-1.37971	1.80679	-19.8105	2.52e-19	7.88e-17	34.1133	FBgn0030050	CG12111	CG12111	CG12111	31796	5529 // sugar binding // inferred from sequence or structural similarity /// 5529 // sugar binding // inferred from electronic annotation /// 5529 // sugar binding // inferred from sequence similarity	---	---	IPR001304 // C-type lectin // 6.8E-29
8411	149610_at	-1.93269	1.20336	-19.8071	2.53e-19	7.88e-17	34.1084	FBgn0037782	CG12813	CG12813	CG12813	41232	---	---	---	IPR003172 // E1 protein and Def2/Der2 allergen // 4.6E-40
5703	146902_at	-2.15493	1.27984	-19.7327	2.83e-19	8.61e-17	33.9994	FBgn0040092	CG1652	lectin-46Cb	lectin-46Cb	53522	5529 // sugar binding // inferred from sequence or structural similarity /// 5534 // galactose binding // inferred from sequence or structural similarity /// 5529 // sugar binding // inferred from electronic annotation /// 5529 // sugar binding // inferred from sequence similarity /// 5534 // galactose binding // inferred from sequence similarity	---	---	IPR001304 // C-type lectin // 1.9E-4
7312	148511_at	-2.01733	2.71461	-19.6463	3.21e-19	9.57e-17	33.8724	FBgn0036072	CG6628	CG6628	CG6628	39183	4601 // peroxidase activity // inferred from electronic annotation /// 5506 // iron ion binding // inferred from electronic annotation /// 16491 // oxidoreductase activity // inferred from electronic annotation /// 46872 // metal ion binding // inferred from electronic annotation	6952 // defense response // inferred from electronic annotation	5576 // extracellular region // inferred from electronic annotation	IPR001283 // Allergen V5/Tpx-1 related // 2.7E-37
9377	150576_at	-1.40822	2.6363	-19.3608	4.92e-19	1.41e-16	33.4487	FBgn0039312	CG10514	CG10514	CG10514	43052	5515 // protein binding // inferred from physical interaction /// 16301 // kinase activity // inferred from electronic annotation /// 16740 // transferase activity // inferred from electronic annotation	---	---	IPR004119 // Protein of unknown function DUF227 // 2.2E-121
10945	152144_at	-1.53722	4.70519	-18.8765	1.03e-18	2.77e-16	32.7171	FBgn0033287	CG8701	CG8701	CG8701	35812	5515 // protein binding // inferred from physical interaction	---	---	IPR006611 // Cysteine-rich protein of unknown function DM6 // 1.0E-80
9075	150274_at	-1.78714	2.26459	-18.6929	1.36e-18	3.47e-16	32.4354	FBgn0038820	CG4000	CG4000	CG4000	42451	---	---	---	---
11527	152726_at	-1.90941	1.63778	-18.6781	1.39e-18	3.49e-16	32.4126	FBgn0033271	CG8708	CG8708	CG8708	35792	16740 // transferase activity // inferred from electronic annotation /// 16757 // transferase activity, transferring glycosyl groups // inferred from electronic annotation /// 48531 // beta-1,3-galactosyltransferase activity // inferred from direct assay	6464 // protein modification // inferred from electronic annotation /// 6486 // protein amino acid glycosylation // inferred from direct assay /// 6486 // protein amino acid glycosylation // inferred from electronic annotation /// 19538 // protein metabolism // inferred from electronic annotation	---	---
4967	146166_at	-1.51392	1.79497	-18.4946	1.85e-18	4.48e-16	32.1282	FBgn0032265	CG18301	CG18301	CG18301	34451	16298 // lipase activity // inferred from electronic annotation /// 16787 // hydrolase activity // inferred from electronic annotation /// 5515 // protein binding // inferred from physical interaction /// 3824 // catalytic activity // inferred from electronic annotation /// 16789 // carboxylic ester hydrolase activity // inferred from electronic annotation	6629 // lipid metabolism // inferred from electronic annotation /// 16042 // lipid catabolism // inferred from electronic annotation	---	IPR000073 // Alpha/beta hydrolase fold // 1.5E-13 /// IPR006693 // Ab-hydrolase associated lipase region // 2.9E-30
549	141748_at	-1.51275	4.3963	-18.4373	2.03e-18	4.73e-16	32.039	FBgn0052030	CG32030	CG32030	CG32030	39004	3779 // actin binding // inferred from sequence or structural similarity /// 3677 // DNA binding // inferred from electronic annotation /// 3779 // actin binding // inferred from electronic annotation /// 5488 // binding // inferred from electronic annotation /// 3779 // actin binding // inferred from sequence similarity	16043 // cell organization and biogenesis // inferred from electronic annotation /// 30036 // actin cytoskeleton organization and biogenesis // inferred from electronic annotation	5634 // nucleus // inferred from electronic annotation	IPR003104 // Actin-binding FH2 // 1.4E-123
8700	149899_at	-1.5817	2.82671	-18.3799	2.22e-18	5.1e-16	31.9493	FBgn0038236	CG3360	Cyp313a1	Cyp313a1	41759	3735 // structural constituent of ribosome // inferred from electronic annotation /// 4497 // monooxygenase activity // inferred from electronic annotation /// 16491 // oxidoreductase activity // inferred from electronic annotation	6118 // electron transport // inferred from electronic annotation /// 6412 // protein biosynthesis // inferred from electronic annotation /// 8202 // steroid metabolism // inferred from electronic annotation /// 17143 // insecticide metabolism // non-traceable author statement	5622 // intracellular // inferred from electronic annotation /// 5792 // microsome // non-traceable author statement /// 5840 // ribosome // inferred from electronic annotation /// 16020 // membrane // non-traceable author statement	IPR001128 // Cytochrome P450 // 5.5E-5 /// IPR001128 // Cytochrome P450 // 4.8E-59
4346	145545_s_at	-1.96969	2.09766	-18.3533	2.31e-18	5.14e-16	31.9076	FBgn0031276 /// FBgn0040725	CG12506 /// CG13946	CG12506 /// CG13946	CG12506 /// CG13946	33249 /// 50198	---	---	---	---
8993	150192_at	-1.41476	1.93784	-18.274	2.62e-18	5.74e-16	31.7831	FBgn0038701	CG18493	CG18493	CG18493	42319	8233 // peptidase activity // inferred from electronic annotation /// 8236 // serine-type peptidase activity // inferred from electronic annotation /// 3824 // catalytic activity // inferred from electronic annotation	6508 // proteolysis // inferred from electronic annotation /// 19538 // protein metabolism // inferred from electronic annotation	5764 // lysosome // inferred from electronic annotation	IPR008758 // Peptidase S28 // 1.0E-126
4904	146103_at	-2.29381	2.63932	-18.0863	3.53e-18	7.6e-16	31.4866	FBgn0032144	CG17633	CG17633	CG17633	34297	4182 // carboxypeptidase A activity // inferred from sequence or structural similarity /// 4180 // carboxypeptidase activity // inferred from electronic annotation /// 4182 // carboxypeptidase A activity // inferred from electronic annotation /// 4182 // carboxypeptidase A activity // inferred from sequence similarity	6508 // proteolysis // inferred from electronic annotation	---	IPR000834 // Peptidase M14, carboxypeptidase A // 3.8E-83
158	141357_at	-1.24417	2.37531	-18.0197	3.92e-18	8.33e-16	31.3807	FBgn0030101	CG12118	CG12118	CG12118	31857	5515 // protein binding // inferred from physical interaction	---	---	---
11844	153043_at	-1.77851	2.34491	-17.9727	4.23e-18	8.84e-16	31.3058	---	CG18170 /// CG33791	---	---	---	4591 // oxoglutarate dehydrogenase (succinyl-transferring) activity // inferred from sequence or structural similarity /// 4591 // oxoglutarate dehydrogenase (succinyl-transferring) activity // inferred from electronic annotation /// 30976 // thiamin pyrophosphate binding // inferred from electronic annotation /// 16624 // oxidoreductase activity, acting on the aldehyde or oxo group of donors, di…	6099 // tricarboxylic acid cycle // inferred from sequence or structural similarity /// 6096 // glycolysis // inferred from electronic annotation /// 8152 // metabolism // inferred from electronic annotation	9353 // oxoglutarate dehydrogenase complex (sensu Eukaryota) // inferred from sequence or structural similarity	---
10914	152113_at	-1.10893	2.45276	-17.887	4.85e-18	9.85e-16	31.1687	FBgn0011746	CG8084	ana	anachronism	35913	---	7406 // negative regulation of neuroblast proliferation // non-traceable author statement	5576 // extracellular region // non-traceable author statement	---
10566	151765_at	-1.69546	4.59898	-17.7966	5.61e-18	1.11e-15	31.0234	FBgn0051988	CG31988	CG31988	CG31988	326182	5200 // structural constituent of cytoskeleton // inferred from electronic annotation /// 8270 // zinc ion binding // inferred from electronic annotation /// 46872 // metal ion binding // inferred from electronic annotation	6928 // cell motility // inferred from electronic annotation /// 7010 // cytoskeleton organization and biogenesis // inferred from electronic annotation	---	IPR001781 // Zn-binding protein, LIM // 2.5E-16 /// IPR001781 // Zn-binding protein, LIM // 2.1E-22 /// IPR001781 // Zn-binding protein, LIM // 3.5E-13
7223	148422_at	-2.72051	2.82563	-17.7195	6.36e-18	1.2e-15	30.8992	FBgn0035926	CG5804	CG5804	CG5804	39005	62 // acyl-CoA binding // inferred from sequence or structural similarity /// 4857 // enzyme inhibitor activity // inferred from sequence or structural similarity /// 5386 // carrier activity // inferred from electronic annotation /// 50809 // diazepam binding // inferred from sequence or structural similarity /// 62 // acyl-CoA binding // inferred from electronic annotation /// 62 // acyl-CoA bi…	6869 // lipid transport // inferred from electronic annotation /// 42049 // cell acyl-CoA homeostasis // inferred from sequence or structural similarity /// 42049 // cell acyl-CoA homeostasis // inferred from sequence similarity	---	IPR000582 // Acyl-coA-binding protein, ACBP // 2.7E-15
5446	146645_at	-1.89318	3.95753	-17.5212	8.77e-18	1.58e-15	30.5771	FBgn0033027 /// FBgn0068016	CG12408	TpnC4 /// DyakTpnC4	TpnC4 /// TpnC4	35498	5509 // calcium ion binding // inferred from sequence or structural similarity /// 5509 // calcium ion binding // non-traceable author statement /// 5516 // calmodulin binding // inferred from electronic annotation /// 5515 // protein binding // inferred from physical interaction /// 5509 // calcium ion binding // inferred from electronic annotation /// 5509 // calcium ion binding // inferred fro…	1539 // ciliary or flagellar motility // inferred from electronic annotation /// 6936 // muscle contraction // inferred from electronic annotation /// 19722 // calcium-mediated signaling // inferred from electronic annotation	9288 // flagellum (sensu Bacteria) // inferred from electronic annotation	IPR002048 // Calcium-binding EF-hand // 0.025 /// IPR002048 // Calcium-binding EF-hand // 0.0076 /// IPR002048 // Calcium-binding EF-hand // 4.0E-5 /// IPR002048 // Calcium-binding EF-hand // 1.2E-6
1399	142598_at	-1.14211	1.97761	-17.4676	9.58e-18	1.69e-15	30.4895	FBgn0039010	CG4907	CG4907	CG4907	42686	---	---	---	IPR007070 // Phosphatidylinositolglycan class N (PIG-N) // 1.0E-126
4653	145852_at	-2.02284	5.18404	-17.4642	9.63e-18	1.69e-15	30.484	FBgn0031746	CG9029	CG9029	CG9029	33815	---	6952 // defense response // inferred from sequence or structural similarity /// 6952 // defense response // inferred from sequence similarity	---	---
3068	144267_at	-1.47488	2.48066	-17.3705	1.12e-17	1.92e-15	30.3302	FBgn0028856	CG18063	CG18063	CG18063	34943	---	---	---	IPR000048 // IQ calmodulin-binding region // 5.1E-6 /// IPR000048 // IQ calmodulin-binding region // 9.8E-5 /// IPR000048 // IQ calmodulin-binding region // 5.1E-6 /// IPR000048 // IQ calmodulin-binding region // 9.8E-5
6682	147881_at	-1.11412	3.27693	-17.2853	1.29e-17	2.11e-15	30.1899	FBgn0035046	CG3683	CG3683	CG3683	37946	3954 // NADH dehydrogenase activity // inferred from sequence or structural similarity /// 8137 // NADH dehydrogenase (ubiquinone) activity // inferred from sequence or structural similarity /// 5515 // protein binding // inferred from physical interaction /// 3954 // NADH dehydrogenase activity // inferred from sequence similarity /// 8137 // NADH dehydrogenase (ubiquinone) activity // inferred …	6120 // mitochondrial electron transport, NADH to ubiquinone // inferred from sequence or structural similarity /// 6120 // mitochondrial electron transport, NADH to ubiquinone // inferred from sequence similarity	5747 // respiratory chain complex I (sensu Eukaryota) // inferred from sequence or structural similarity /// 5747 // respiratory chain complex I (sensu Eukaryota) // inferred from sequence similarity	IPR010625 // CHCH // 0.037 /// IPR010625 // CHCH // 3.0E-12
11066	152265_at	-1.78046	2.63127	-17.2516	1.37e-17	2.18e-15	30.1343	FBgn0039313	CG11892	CG11892	CG11892	43053	5515 // protein binding // inferred from physical interaction /// 16301 // kinase activity // inferred from electronic annotation /// 16740 // transferase activity // inferred from electronic annotation	---	---	IPR004119 // Protein of unknown function DUF227 // 5.1E-119
10244	151443_at	-1.59493	4.65955	-17.0723	1.84e-17	2.83e-15	29.8363	FBgn0045827	CG13245	CG13245	CG13245	50456	---	---	---	---
356	141555_at	-0.984909	1.87761	-17.0396	1.94e-17	2.92e-15	29.7818	FBgn0031574	CG3964	CG3964	CG3964	33609	4835 // tubulin-tyrosine ligase activity // inferred from sequence or structural similarity /// 5200 // structural constituent of cytoskeleton // inferred from electronic annotation /// 4835 // tubulin-tyrosine ligase activity // inferred from electronic annotation /// 4835 // tubulin-tyrosine ligase activity // inferred from sequence similarity	6464 // protein modification // inferred from electronic annotation /// 19538 // protein metabolism // inferred from electronic annotation	---	IPR004344 // Tubulin-tyrosine ligase // 1.0E-126
5815	147014_at	-1.92264	1.52473	-17.039	1.95e-17	2.92e-15	29.7807	FBgn0043470	CG12350	Try	Try	36214	4263 // chymotrypsin activity // inferred from electronic annotation /// 4295 // trypsin activity // inferred from sequence or structural similarity /// 4295 // trypsin activity // non-traceable author statement /// 4252 // serine-type endopeptidase activity // inferred from electronic annotation /// 4295 // trypsin activity // inferred from electronic annotation /// 8233 // peptidase activity //…	6508 // proteolysis // non-traceable author statement /// 6508 // proteolysis // inferred from electronic annotation	5576 // extracellular region // inferred from sequence or structural similarity /// 5576 // extracellular region // inferred from sequence similarity	IPR001254 // Peptidase S1, chymotrypsin // 2.5E-81
10193	151392_at	-1.20486	3.53345	-17.0346	1.96e-17	2.92e-15	29.7734	FBgn0040923	CG11368	CG11368	CG11368	50397	---	---	---	---
1916	143115_at	-1.099	4.33775	-17.017	2.02e-17	2.98e-15	29.7439	FBgn0000409	CG17903	Cyt-c-p	Cytochrome c proximal	34996	16491 // oxidoreductase activity // inferred from electronic annotation /// 45155 // electron transporter, transferring electrons from CoQH2-cytochrome c reductase complex and cytochrome c oxidase complex activity // inferred from sequence or structural similarity /// 5515 // protein binding // inferred from physical interaction /// 5506 // iron ion binding // inferred from electronic annotation …	6118 // electron transport // inferred from sequence or structural similarity /// 6118 // electron transport // non-traceable author statement /// 6119 // oxidative phosphorylation // inferred from sequence or structural similarity /// 6118 // electron transport // inferred from direct assay /// 6118 // electron transport // inferred from electronic annotation /// 6810 // transport // inferred fr…	5739 // mitochondrion // inferred from direct assay /// 5743 // mitochondrial inner membrane // inferred from sequence or structural similarity /// 5759 // mitochondrial matrix // inferred from sequence or structural similarity /// 5759 // mitochondrial matrix // non-traceable author statement /// 5739 // mitochondrion // inferred from electronic annotation /// 5746 // mitochondrial electron tran…	IPR003088 // Cytochrome c, class I // 6.0E-34
11010	152209_at	-1.34069	2.82341	-16.9373	2.31e-17	3.37e-15	29.6104	FBgn0030853	CG5703	CG5703	CG5703	32740	3954 // NADH dehydrogenase activity // inferred from sequence or structural similarity /// 8137 // NADH dehydrogenase (ubiquinone) activity // inferred from sequence or structural similarity /// 8137 // NADH dehydrogenase (ubiquinone) activity // inferred from electronic annotation /// 3954 // NADH dehydrogenase activity // inferred from sequence similarity /// 8137 // NADH dehydrogenase (ubiquin…	6120 // mitochondrial electron transport, NADH to ubiquinone // inferred from sequence or structural similarity /// 6120 // mitochondrial electron transport, NADH to ubiquinone // inferred from electronic annotation /// 6120 // mitochondrial electron transport, NADH to ubiquinone // inferred from sequence similarity	5747 // respiratory chain complex I (sensu Eukaryota) // inferred from sequence or structural similarity /// 5747 // respiratory chain complex I (sensu Eukaryota) // inferred from sequence similarity	IPR002023 // NADH dehydrogenase (ubiquinone), 24 kDa subunit // 2.0E-95 /// IPR002023 // NADH dehydrogenase (ubiquinone), 24 kDa subunit // 2.0E-95
10668	151867_at	-1.2864	2.17551	-16.8691	2.59e-17	3.7e-15	29.4956	FBgn0037915	CG6790	CG6790	CG6790	41388	---	---	---	IPR007070 // Phosphatidylinositolglycan class N (PIG-N) // 1.0E-126
11508	152707_at	-0.883854	1.91169	-16.7779	3.02e-17	4.23e-15	29.3414	FBgn0034655	CG10307	CG10307	CG10307	37477	4672 // protein kinase activity // inferred from electronic annotation /// 4675 // transmembrane receptor protein serine/threonine kinase activity // inferred from electronic annotation /// 4872 // receptor activity // inferred from electronic annotation /// 5198 // structural molecule activity // inferred from electronic annotation /// 16301 // kinase activity // inferred from electronic annotat…	6464 // protein modification // inferred from electronic annotation /// 6468 // protein amino acid phosphorylation // inferred from electronic annotation /// 6952 // defense response // inferred from electronic annotation /// 7154 // cell communication // inferred from electronic annotation /// 7165 // signal transduction // inferred from electronic annotation /// 7166 // cell surface receptor li…	---	IPR001611 // Leucine-rich repeat // 0.068 /// IPR001611 // Leucine-rich repeat // 0.18 /// IPR001611 // Leucine-rich repeat // 1.3E-4 /// IPR001611 // Leucine-rich repeat // 0.0090 /// IPR001611 // Leucine-rich repeat // 0.025
8478	149677_s_at	-1.7298	4.51797	-16.6512	3.74e-17	5.19e-15	29.1262	FBgn0037889 /// FBgn0037888 /// FBgn0037879	CG5106 /// CG17210 /// CG5207	scpr-A /// scpr-B /// scpr-C	SCP-containing protein A /// SCP-containing protein B /// SCP-containing protein C	41348 /// 41357 /// 41358	5515 // protein binding // inferred from physical interaction /// 3676 // nucleic acid binding // inferred from electronic annotation /// 8270 // zinc ion binding // inferred from electronic annotation /// 46872 // metal ion binding // inferred from electronic annotation /// 5515 // protein binding // inferred from electronic annotation	6512 // ubiquitin cycle // inferred from electronic annotation	5576 // extracellular region // inferred from electronic annotation /// 5634 // nucleus // inferred from electronic annotation	IPR001283 // Allergen V5/Tpx-1 related // 7.2E-28 /// IPR001283 // Allergen V5/Tpx-1 related // 1.3E-27 /// IPR001283 // Allergen V5/Tpx-1 related // 1.3E-27
11448	152647_at	-1.17475	2.30767	-16.5977	4.1e-17	5.58e-15	29.0349	FBgn0042710	CG32849	Hex-t2	Hex-t2	43191	4396 // hexokinase activity // non-traceable author statement /// 5524 // ATP binding // inferred from electronic annotation /// 166 // nucleotide binding // inferred from electronic annotation /// 4396 // hexokinase activity // inferred from electronic annotation /// 16301 // kinase activity // inferred from electronic annotation /// 16740 // transferase activity // inferred from electronic anno…	6096 // glycolysis // non-traceable author statement /// 6096 // glycolysis // inferred from electronic annotation	---	IPR001312 // Hexokinase // 3.0E-90 /// IPR001312 // Hexokinase // 7.7E-99
4596	145795_at	-3.39496	3.11998	-16.5094	4.77e-17	6.42e-15	28.8836	FBgn0031653	CG8871	Jon25Biii	Jonah 25Biii	33706	4263 // chymotrypsin activity // inferred from electronic annotation /// 4295 // trypsin activity // inferred from electronic annotation /// 8236 // serine-type peptidase activity // inferred from electronic annotation /// 42708 // elastase activity // non-traceable author statement /// 4252 // serine-type endopeptidase activity // inferred from electronic annotation /// 8233 // peptidase activit…	6508 // proteolysis // non-traceable author statement /// 6508 // proteolysis // inferred from electronic annotation	---	IPR001254 // Peptidase S1, chymotrypsin // 1.0E-43
11170	152369_at	-2.35509	3.60346	-16.391	5.84e-17	7.8e-15	28.6796	FBgn0032049	CG13095	CG13095	CG13095	34182	4190 // aspartic-type endopeptidase activity // inferred from sequence or structural similarity /// 4194 // pepsin A activity // inferred from electronic annotation /// 4190 // aspartic-type endopeptidase activity // inferred from electronic annotation /// 8233 // peptidase activity // inferred from electronic annotation /// 16787 // hydrolase activity // inferred from electronic annotation /// 4…	6508 // proteolysis // inferred from electronic annotation	---	IPR001461 // Peptidase A1, pepsin // 1.0E-126
9173	150372_at	-1.83474	3.41771	-16.2923	6.93e-17	8.99e-15	28.5087	FBgn0038978	CG7045	CG7045	CG7045	42650	3677 // DNA binding // inferred from sequence or structural similarity /// 3677 // DNA binding // inferred from sequence similarity	6355 // regulation of transcription, DNA-dependent // inferred from electronic annotation	785 // chromatin // inferred from sequence or structural similarity /// 5634 // nucleus // inferred from sequence or structural similarity /// 785 // chromatin // inferred from sequence similarity /// 5634 // nucleus // inferred from sequence similarity	IPR000910 // HMG1/2 (high mobility group) box // 1.1E-24
3038	144237_at	-1.0622	1.53032	-16.2732	7.16e-17	9.12e-15	28.4756	FBgn0028561	CG17976	sut3	sugar transporter 3	44268	5351 // sugar porter activity // inferred from sequence or structural similarity /// 5355 // glucose transporter activity // inferred from sequence or structural similarity /// 5215 // transporter activity // inferred from electronic annotation /// 5351 // sugar porter activity // inferred from electronic annotation /// 5351 // sugar porter activity // inferred from sequence similarity /// 5355 /…	5975 // carbohydrate metabolism // inferred from electronic annotation /// 8643 // carbohydrate transport // inferred from electronic annotation /// 6810 // transport // inferred from electronic annotation	16020 // membrane // inferred from electronic annotation /// 16021 // integral to membrane // inferred from electronic annotation	IPR005828 // General substrate transporter // 4.3E-82
6549	147748_at	-1.07184	1.66244	-16.2414	7.57e-17	9.55e-15	28.4203	FBgn0034827	CG12192	Klp59D	Klp59D	37674	3774 // motor activity // inferred from sequence or structural similarity /// 3777 // microtubule motor activity // inferred from electronic annotation /// 3777 // microtubule motor activity // inferred from sequence or structural similarity /// 5200 // structural constituent of cytoskeleton // inferred from electronic annotation /// 5524 // ATP binding // inferred from electronic annotation /// …	6605 // protein targeting // inferred from electronic annotation /// 6886 // intracellular protein transport // inferred from electronic annotation /// 7018 // microtubule-based movement // inferred from sequence or structural similarity /// 7018 // microtubule-based movement // inferred from electronic annotation /// 7018 // microtubule-based movement // inferred from sequence similarity	5871 // kinesin complex // inferred from sequence or structural similarity /// 5875 // microtubule associated complex // inferred from electronic annotation /// 5871 // kinesin complex // inferred from sequence similarity	IPR001752 // Kinesin, motor region // 1.0E-126
13278	154477_at	-1.117	3.23425	-16.1989	8.15e-17	1.02e-14	28.3463	FBgn0019957	CG6343	ND42	NADH:ubiquinone reductase 42kD subunit precursor	42591	3954 // NADH dehydrogenase activity // inferred from sequence or structural similarity /// 3954 // NADH dehydrogenase activity // non-traceable author statement /// 5524 // ATP binding // inferred from electronic annotation /// 8137 // NADH dehydrogenase (ubiquinone) activity // non-traceable author statement /// 16773 // phosphotransferase activity, alcohol group as acceptor // inferred from ele…	6118 // electron transport // non-traceable author statement /// 6120 // mitochondrial electron transport, NADH to ubiquinone // inferred from sequence or structural similarity /// 6139 // nucleobase, nucleoside, nucleotide and nucleic acid metabolism // inferred from electronic annotation /// 6120 // mitochondrial electron transport, NADH to ubiquinone // inferred from sequence similarity	5747 // respiratory chain complex I (sensu Eukaryota) // inferred from sequence or structural similarity /// 5747 // respiratory chain complex I (sensu Eukaryota) // non-traceable author statement /// 5759 // mitochondrial matrix // non-traceable author statement /// 5739 // mitochondrion // inferred from electronic annotation /// 5747 // respiratory chain complex I (sensu Eukaryota) // inferred …	IPR002624 // Deoxynucleoside kinase // 1.3E-26
11784	152983_at	-1.69372	4.45187	-16.1538	8.82e-17	1.09e-14	28.2675	FBgn0038762	CG4836	CG4836	CG4836	42387	3939 // L-iditol 2-dehydrogenase activity // inferred from sequence or structural similarity /// 4024 // alcohol dehydrogenase activity, zinc-dependent // inferred from electronic annotation /// 8270 // zinc ion binding // inferred from electronic annotation /// 3939 // L-iditol 2-dehydrogenase activity // inferred from sequence similarity	5975 // carbohydrate metabolism // inferred from electronic annotation	---	IPR002085 // Zinc-containing alcohol dehydrogenase superfamily // 1.2E-44 /// IPR002085 // Zinc-containing alcohol dehydrogenase superfamily // 1.2E-44
12020	153219_at	-1.50088	2.46337	-16.1062	9.58e-17	1.18e-14	28.1841	FBgn0036415	CG7768	CG7768	CG7768	39573	3755 // peptidyl-prolyl cis-trans isomerase activity // inferred from sequence or structural similarity /// 5515 // protein binding // inferred from physical interaction /// 3755 // peptidyl-prolyl cis-trans isomerase activity // inferred from electronic annotation /// 16853 // isomerase activity // inferred from electronic annotation /// 3755 // peptidyl-prolyl cis-trans isomerase activity // in…	6457 // protein folding // inferred from electronic annotation /// 6605 // protein targeting // inferred from electronic annotation /// 6952 // defense response // inferred from electronic annotation	---	IPR002130 // Peptidyl-prolyl cis-trans isomerase, cyclophilin type // 3.1E-115
4818	146017_at	-1.14904	1.57236	-16.0799	1e-16	1.22e-14	28.1381	FBgn0032008	CG14277	CG14277	CG14277	34129	---	---	---	---
1992	143191_at	-1.2554	1.00477	-16.057	1.04e-16	1.25e-14	28.0979	FBgn0001216	CG8937	Hsc70-1	Heat shock protein cognate 1	39542	5524 // ATP binding // inferred from electronic annotation /// 16887 // ATPase activity // non-traceable author statement /// 51082 // unfolded protein binding // inferred from sequence or structural similarity /// 166 // nucleotide binding // inferred from electronic annotation /// 51082 // unfolded protein binding // inferred from sequence similarity	6457 // protein folding // inferred from electronic annotation /// 6457 // protein folding // inferred from sequence or structural similarity /// 6461 // protein complex assembly // inferred from electronic annotation /// 6952 // defense response // inferred from electronic annotation /// 9408 // response to heat // non-traceable author statement /// 6986 // response to unfolded protein // inferr…	5739 // mitochondrion // inferred from sequence or structural similarity /// 5739 // mitochondrion // inferred from sequence similarity	IPR001023 // Heat shock protein Hsp70 // 1.0E-126 /// IPR001023 // Heat shock protein Hsp70 // 1.0E-126
11606	152805_at	-1.70001	3.66171	-16.0248	1.1e-16	1.31e-14	28.0413	FBgn0028870	CG4691	CG4691	CG4691	34856	---	---	---	IPR006611 // Cysteine-rich protein of unknown function DM6 // 4.1E-75
9807	151006_at	-1.35539	4.40108	-16.0059	1.14e-16	1.34e-14	28.008	FBgn0040519	CG15219	CG15219	CG15219	49992	---	---	---	---
4444	145643_at	-1.27672	3.64948	-15.8912	1.4e-16	1.61e-14	27.8054	FBgn0051948	CG31948	CG31948	CG31948	326178	3824 // catalytic activity // inferred from electronic annotation	6629 // lipid metabolism // inferred from electronic annotation	---	IPR000626 // Ubiquitin // 0.015
8130	149329_at	-0.803624	0.496001	-15.8882	1.41e-16	1.61e-14	27.8001	FBgn0037323	CG2663	CG2663	CG2663	40649	5386 // carrier activity // inferred from electronic annotation /// 8431 // vitamin E binding // inferred from sequence or structural similarity /// 5215 // transporter activity // inferred from electronic annotation /// 8431 // vitamin E binding // inferred from sequence similarity	6732 // coenzyme metabolism // inferred from electronic annotation /// 6810 // transport // inferred from electronic annotation /// 51189 // prosthetic group metabolism // inferred from electronic annotation	5622 // intracellular // inferred from electronic annotation	IPR001251 // Cellular retinaldehyde-binding)/triple function, C-terminal // 6.5E-14 /// IPR001251 // Cellular retinaldehyde-binding)/triple function, C-terminal // 6.5E-14
11888	153087_at	-1.08536	2.7081	-15.8036	1.63e-16	1.86e-14	27.6498	FBgn0034479	CG8654	CG8654	CG8654	37275	8513 // organic cation porter activity // inferred from sequence or structural similarity /// 5215 // transporter activity // inferred from electronic annotation /// 8513 // organic cation porter activity // inferred from sequence similarity	6812 // cation transport // inferred from electronic annotation /// 6820 // anion transport // inferred from electronic annotation /// 6858 // extracellular transport // inferred from electronic annotation /// 6810 // transport // inferred from electronic annotation	16021 // integral to membrane // inferred from electronic annotation /// 16020 // membrane // inferred from electronic annotation	IPR005828 // General substrate transporter // 9.8E-25
3107	144306_at	-0.884875	1.52357	-15.7463	1.81e-16	2.01e-14	27.5475	FBgn0028915	CG7532	CG7532	CG7532	34838	4252 // serine-type endopeptidase activity // inferred from sequence or structural similarity /// 4252 // serine-type endopeptidase activity // inferred from sequence similarity	---	---	IPR002861 // Reeler region // 8.5E-11
11595	152794_at	-1.79899	1.9592	-15.7473	1.8e-16	2.01e-14	27.5494	FBgn0035781	CG8560	CG8560	CG8560	38830	4180 // carboxypeptidase activity // non-traceable author statement /// 4182 // carboxypeptidase A activity // inferred from electronic annotation /// 4180 // carboxypeptidase activity // inferred from electronic annotation	6508 // proteolysis // inferred from electronic annotation	---	IPR000834 // Peptidase M14, carboxypeptidase A // 1.8E-71
11303	152502_at	-1.00641	1.67698	-15.6991	1.97e-16	2.15e-14	27.4632	FBgn0032424	CG17010	CG17010	CG17010	34650	4747 // ribokinase activity // inferred from sequence or structural similarity /// 19201 // nucleotide kinase activity // inferred from electronic annotation /// 5515 // protein binding // inferred from physical interaction /// 4747 // ribokinase activity // inferred from electronic annotation /// 3723 // RNA binding // inferred from electronic annotation /// 3743 // translation initiation factor…	5975 // carbohydrate metabolism // inferred from electronic annotation /// 6014 // D-ribose metabolism // inferred from electronic annotation /// 6413 // translational initiation // inferred from electronic annotation	5737 // cytoplasm // inferred from electronic annotation	IPR002173 // Carbohydrate kinase, PfkB // 3.8E-54
236	141435_at	-2.41091	2.45129	-15.694	1.98e-16	2.15e-14	27.4541	FBgn0031249	CG11911	CG11911	CG11911	33206	4252 // serine-type endopeptidase activity // inferred from sequence or structural similarity /// 4263 // chymotrypsin activity // non-traceable author statement /// 4295 // trypsin activity // inferred from electronic annotation /// 4252 // serine-type endopeptidase activity // inferred from electronic annotation /// 8236 // serine-type peptidase activity // inferred from electronic annotation /…	6508 // proteolysis // non-traceable author statement /// 6508 // proteolysis // inferred from electronic annotation	---	IPR001254 // Peptidase S1, chymotrypsin // 1.6E-63
6091	147290_at	-1.24121	2.05797	-15.6805	2.03e-16	2.18e-14	27.4299	FBgn0034097	CG3687	CG3687	CG3687	36803	5515 // protein binding // inferred from physical interaction	---	---	---
11798	152997_at	-1.36517	2.83657	-15.6673	2.08e-16	2.21e-14	27.4063	FBgn0032869	CG17470	CG17470	CG17470	35321	---	7498 // mesoderm development // inferred from expression pattern	---	---
10757	151956_at	-0.988003	1.2036	-15.6405	2.18e-16	2.3e-14	27.3581	FBgn0033423	CG1809	CG1809	CG1809	35981	4035 // alkaline phosphatase activity // inferred from sequence or structural similarity /// 19204 // nucleotide phosphatase activity // inferred from electronic annotation /// 287 // magnesium ion binding // inferred from electronic annotation /// 8270 // zinc ion binding // inferred from electronic annotation /// 16787 // hydrolase activity // inferred from electronic annotation /// 4035 // alk…	1501 // skeletal development // inferred from electronic annotation /// 7498 // mesoderm development // inferred from electronic annotation /// 8152 // metabolism // inferred from electronic annotation	---	IPR001952 // Alkaline phosphatase // 8.2E-96
5921	147120_at	-1.95675	1.991	-15.4924	2.85e-16	2.95e-14	27.0912	FBgn0033776	CG17575	CG17575	CG17575	36414	---	6952 // defense response // inferred from electronic annotation	5576 // extracellular region // inferred from electronic annotation	IPR001283 // Allergen V5/Tpx-1 related // 2.1E-37
11513	152712_at	-1.64165	2.82254	-15.4226	3.23e-16	3.26e-14	26.9647	FBgn0032371	CG4983	CG4983	CG4983	34585	5515 // protein binding // inferred from physical interaction	---	---	---
11753	152952_at	-1.34272	2.32184	-15.424	3.22e-16	3.26e-14	26.9672	FBgn0036029	CG16719	CG16719	CG16719	39131	5515 // protein binding // inferred from physical interaction	7498 // mesoderm development // non-traceable author statement	---	IPR010441 // Protein of unknown function DUF1042 // 3.9E-81
11243	152442_at	-1.47656	1.96775	-15.3884	3.44e-16	3.44e-14	26.9027	FBgn0051233	CG31233	CG31233	CG31233	42557	4179 // membrane alanyl aminopeptidase activity // inferred from sequence or structural similarity /// 4179 // membrane alanyl aminopeptidase activity // inferred from electronic annotation /// 4179 // membrane alanyl aminopeptidase activity // inferred from sequence similarity	6508 // proteolysis // inferred from electronic annotation	---	IPR001930 // Peptidase M1, membrane alanine aminopeptidase // 1.0E-126
7753	148952_at	-1.4898	2.21915	-15.2896	4.11e-16	4e-14	26.7225	FBgn0036723 /// FBgn0036905	CG12229	CG12229 /// CG14101	CG12229 /// CG14101	39945 /// 40154	4743 // pyruvate kinase activity // inferred from electronic annotation /// 5515 // protein binding // inferred from physical interaction /// 16772 // transferase activity, transferring phosphorus-containing groups // inferred from electronic annotation	6096 // glycolysis // inferred from electronic annotation	---	---
11296	152495_at	-1.02684	2.21808	-15.2119	4.74e-16	4.58e-14	26.5801	FBgn0052392	CG32392	CG32392	CG32392	38751	8017 // microtubule binding // inferred from sequence or structural similarity /// 5515 // protein binding // inferred from physical interaction /// 8017 // microtubule binding // inferred from sequence similarity	7017 // microtubule-based process // inferred from sequence or structural similarity /// 7017 // microtubule-based process // inferred from sequence similarity	5875 // microtubule associated complex // inferred from sequence or structural similarity /// 5875 // microtubule associated complex // inferred from sequence similarity	IPR009290 // Radial spoke 3 // 1.0E-126 /// IPR009290 // Radial spoke 3 // 1.0E-126
5600	146799_at	-1.49532	2.65671	-15.1797	5.02e-16	4.77e-14	26.5208	FBgn0033280	CG12126	CG12126	CG12126	35805	5515 // protein binding // inferred from physical interaction	---	---	---
11446	152645_at	-1.18699	3.04078	-15.1783	5.04e-16	4.77e-14	26.5184	FBgn0031690	CG7742	CG7742	CG7742	33750	5515 // protein binding // inferred from physical interaction	---	---	---
13913	155112_at	-0.987321	3.19231	-15.15	5.31e-16	4.99e-14	26.4662	---	CG7215 /// CG7217	---	---	---	16209 // antioxidant activity // inferred from sequence or structural similarity /// 4601 // peroxidase activity // inferred from electronic annotation /// 16209 // antioxidant activity // inferred from electronic annotation /// 16491 // oxidoreductase activity // inferred from electronic annotation	---	5777 // peroxisome // inferred from sequence or structural similarity	---
7989	149188_at	-1.35453	4.90771	-15.1352	5.45e-16	5.06e-14	26.439	FBgn0037097	CG7181	CG7181	CG7181	40390	4129 // cytochrome-c oxidase activity // non-traceable author statement	6123 // mitochondrial electron transport, cytochrome c to oxygen // non-traceable author statement	5751 // respiratory chain complex IV (sensu Eukaryota) // non-traceable author statement	---
11504	152703_at	-0.956655	1.42115	-15.0246	6.68e-16	6.12e-14	26.2344	FBgn0034127	CG7848	CG7848	CG7848	36839	4473 // malate dehydrogenase (oxaloacetate-decarboxylating) (NADP+) activity // inferred from sequence or structural similarity /// 16831 // carboxy-lyase activity // inferred from electronic annotation /// 4470 // malic enzyme activity // inferred from electronic annotation /// 16491 // oxidoreductase activity // inferred from electronic annotation /// 16616 // oxidoreductase activity, acting on…	6099 // tricarboxylic acid cycle // inferred from electronic annotation /// 6108 // malate metabolism // inferred from electronic annotation	---	IPR001891 // Malic oxidoreductase // 7.3E-39 /// IPR001891 // Malic oxidoreductase // 8.8E-9 /// IPR001891 // Malic oxidoreductase // 9.1E-32
5989	147188_at	-0.689192	0.334093	-15.008	6.89e-16	6.27e-14	26.2037	FBgn0033904	CG18327	CG18327	CG18327	36567	5386 // carrier activity // inferred from sequence or structural similarity /// 5488 // binding // inferred from electronic annotation /// 5215 // transporter activity // inferred from electronic annotation /// 5386 // carrier activity // inferred from sequence similarity	6810 // transport // inferred from electronic annotation	5740 // mitochondrial envelope // inferred from sequence or structural similarity /// 5743 // mitochondrial inner membrane // inferred from electronic annotation /// 16020 // membrane // inferred from electronic annotation /// 16021 // integral to membrane // inferred from electronic annotation /// 5740 // mitochondrial envelope // inferred from sequence similarity	IPR001993 // Mitochondrial substrate carrier // 4.1E-18 /// IPR001993 // Mitochondrial substrate carrier // 7.4E-23 /// IPR001993 // Mitochondrial substrate carrier // 5.7E-25
5714	146913_at	-1.16329	2.40201	-14.9931	7.08e-16	6.37e-14	26.1761	FBgn0033468 /// FBgn0064441	CG1418	CG1418 /// DpseGA12807	CG1418 /// GA12807	36035	17137 // Rab GTPase binding // inferred from sequence or structural similarity /// 17137 // Rab GTPase binding // inferred from sequence similarity	6886 // intracellular protein transport // inferred from electronic annotation /// 16192 // vesicle-mediated transport // inferred from electronic annotation	---	IPR004895 // Prenylated rab acceptor PRA1 // 3.4E-55
7884	149083_at	-0.985185	1.80224	-14.992	7.1e-16	6.37e-14	26.1739	FBgn0036925	CG17736	schuy	schumacher-levy	40184	---	---	---	---
9520	150719_at	-1.34637	2.05825	-14.9209	8.09e-16	7.22e-14	26.0418	FBgn0039498	CG17991	CG17991	CG17991	43279	5515 // protein binding // inferred from electronic annotation /// 8270 // zinc ion binding // inferred from electronic annotation /// 46872 // metal ion binding // inferred from electronic annotation	6512 // ubiquitin cycle // inferred from electronic annotation	5634 // nucleus // inferred from electronic annotation	IPR001841 // Zn-finger, RING // 3.6E-26
11935	153134_at	-0.944098	2.76432	-14.8566	9.12e-16	7.99e-14	25.9215	FBgn0017567	CG3944	ND23	NADH:ubiquinone reductase 23kD subunit precursor	44207	3954 // NADH dehydrogenase activity // inferred from sequence or structural similarity /// 5506 // iron ion binding // inferred from electronic annotation /// 8137 // NADH dehydrogenase (ubiquinone) activity // inferred from sequence or structural similarity /// 5515 // protein binding // inferred from physical interaction /// 16491 // oxidoreductase activity // inferred from electronic annotatio…	6120 // mitochondrial electron transport, NADH to ubiquinone // inferred from sequence or structural similarity /// 6118 // electron transport // inferred from electronic annotation /// 6120 // mitochondrial electron transport, NADH to ubiquinone // inferred from sequence similarity	5747 // respiratory chain complex I (sensu Eukaryota) // inferred from sequence or structural similarity /// 5747 // respiratory chain complex I (sensu Eukaryota) // inferred from sequence similarity	IPR001450 // 4Fe-4S ferredoxin, iron-sulfur binding domain // 4.9E-7 /// IPR001450 // 4Fe-4S ferredoxin, iron-sulfur binding domain // 2.5E-10
10935	152134_at	-1.65067	2.54396	-14.8443	9.33e-16	8.12e-14	25.8985	FBgn0034835	CG3092	CG3092	CG3092	37682	---	---	---	---
5535	146734_at	-1.1595	1.21963	-14.837	9.46e-16	8.18e-14	25.885	FBgn0033164	CG11112	CG11112	CG11112	35658	---	---	---	---
11445	152644_at	-1.21859	1.57031	-14.7878	1.04e-15	8.91e-14	25.7927	FBgn0038398	CG4979	sxe2	sex-specific enzyme 2	41954	17063 // phosphatidylserine-specific phospholipase A1 activity // inferred from sequence or structural similarity /// 3824 // catalytic activity // inferred from electronic annotation /// 17063 // phosphatidylserine-specific phospholipase A1 activity // inferred from sequence similarity	6629 // lipid metabolism // inferred from electronic annotation	---	IPR000734 // Lipase // 4.6E-21
3060	144259_at	-0.955176	1.4451	-14.7675	1.08e-15	9.2e-14	25.7546	FBgn0028847	CG9014	CG9014	CG9014	34777	4553 // hydrolase activity, hydrolyzing O-glycosyl compounds // inferred from electronic annotation /// 4842 // ubiquitin-protein ligase activity // inferred from electronic annotation /// 8270 // zinc ion binding // inferred from electronic annotation /// 5515 // protein binding // inferred from physical interaction /// 5515 // protein binding // inferred from electronic annotation /// 46872 // …	5975 // carbohydrate metabolism // inferred from electronic annotation /// 16567 // protein ubiquitination // inferred from electronic annotation	151 // ubiquitin ligase complex // inferred from electronic annotation	IPR001841 // Zn-finger, RING // 1.4E-12
3660	144859_at	-1.73709	2.39546	-14.7371	1.14e-15	9.62e-14	25.6974	FBgn0030283	CG15198	CG15198	CG15198	32065	5515 // protein binding // inferred from physical interaction	---	---	---
10406	151605_at	-1.24414	4.22066	-14.7325	1.15e-15	9.65e-14	25.6887	FBgn0038181	CG9297	CG9297	CG9297	41688	5509 // calcium ion binding // inferred from sequence or structural similarity /// 5516 // calmodulin binding // inferred from electronic annotation /// 5509 // calcium ion binding // inferred from electronic annotation /// 5509 // calcium ion binding // inferred from sequence similarity	6816 // calcium ion transport // inferred from sequence or structural similarity /// 7155 // cell adhesion // inferred from electronic annotation /// 6816 // calcium ion transport // inferred from sequence similarity	---	IPR003367 // Thrombospondin type 3 repeat // 39.0 /// IPR003367 // Thrombospondin type 3 repeat // 28.0 /// IPR003367 // Thrombospondin type 3 repeat // 2.7 /// IPR003367 // Thrombospondin type 3 repeat // 26.0 /// IPR003367 // Thrombospondin type 3 repeat // 3.9 /// IPR003367 // Thrombospondin type 3 repeat // 22.0 /// IPR003367 // Thrombospondin type 3 repeat // 27.0 /// IPR003367 // Thrombospo…
6068	147267_at	-0.690711	0.271685	-14.7293	1.16e-15	9.65e-14	25.6826	FBgn0034052	CG8299	CG8299	CG8299	36751	4252 // serine-type endopeptidase activity // inferred from sequence or structural similarity /// 4263 // chymotrypsin activity // inferred from electronic annotation /// 4295 // trypsin activity // non-traceable author statement /// 4252 // serine-type endopeptidase activity // inferred from sequence similarity	6508 // proteolysis // non-traceable author statement	---	IPR001254 // Peptidase S1, chymotrypsin // 1.2E-73
5593	146792_at	-1.03517	4.5789	-14.6981	1.23e-15	1.01e-13	25.6239	FBgn0033268	CG2297	Obp44a	Obp44a	35789	5549 // odorant binding // inferred from electronic annotation	6810 // transport // inferred from electronic annotation	---	IPR006170 // Pheromone/general odorant binding protein, PBP/GOBP // 9.4E-32
7720	148919_at	-1.10407	2.4248	-14.6373	1.37e-15	1.11e-13	25.5089	FBgn0036669 /// FBgn0064442	CG13030	CG13030 /// DpseGA11985	CG13030 /// GA11985	39885	4842 // ubiquitin-protein ligase activity // inferred from electronic annotation /// 8270 // zinc ion binding // inferred from electronic annotation /// 16874 // ligase activity // inferred from sequence or structural similarity /// 5515 // protein binding // inferred from electronic annotation /// 16874 // ligase activity // inferred from electronic annotation /// 46872 // metal ion binding // i…	6511 // ubiquitin-dependent protein catabolism // inferred from sequence or structural similarity /// 7423 // sensory organ development // inferred from sequence or structural similarity /// 16567 // protein ubiquitination // inferred from electronic annotation /// 45676 // regulation of R7 differentiation // inferred from sequence or structural similarity /// 6511 // ubiquitin-dependent protein …	151 // ubiquitin ligase complex // inferred from electronic annotation /// 5634 // nucleus // inferred from sequence or structural similarity /// 5634 // nucleus // inferred from electronic annotation /// 5634 // nucleus // inferred from sequence similarity	IPR004162 // Seven in absentia protein family // 1.0E-126
11016	152215_at	-1.00853	2.89049	-14.6331	1.39e-15	1.11e-13	25.501	FBgn0028487	CG9611	CG9611	CG9611	41677	5102 // receptor binding // inferred from electronic annotation /// 5198 // structural molecule activity // inferred from electronic annotation	7265 // Ras protein signal transduction // inferred from sequence or structural similarity /// 7265 // Ras protein signal transduction // inferred from sequence similarity	---	IPR001611 // Leucine-rich repeat // 0.039 /// IPR001611 // Leucine-rich repeat // 0.025 /// IPR001611 // Leucine-rich repeat // 0.0028 /// IPR001611 // Leucine-rich repeat // 0.012 /// IPR001611 // Leucine-rich repeat // 0.19 /// IPR001611 // Leucine-rich repeat // 0.011 /// IPR001611 // Leucine-rich repeat // 0.4 /// IPR001611 // Leucine-rich repeat // 0.024 /// IPR001611 // Leucine-rich repeat …
1370	142569_at	-1.01565	3.50436	-14.6202	1.42e-15	1.12e-13	25.4766	FBgn0003423	CG1417	slgA	sluggish A	33117	4657 // proline dehydrogenase activity // inferred from sequence or structural similarity /// 4657 // proline dehydrogenase activity // inferred from electronic annotation /// 16491 // oxidoreductase activity // inferred from electronic annotation /// 4657 // proline dehydrogenase activity // inferred from sequence similarity	6537 // glutamate biosynthesis // inferred from sequence or structural similarity /// 6537 // glutamate biosynthesis // non-traceable author statement /// 6562 // proline catabolism // inferred from sequence or structural similarity /// 6562 // proline catabolism // non-traceable author statement /// 7626 // locomotory behavior // inferred from mutant phenotype /// 6537 // glutamate biosynthesis …	5759 // mitochondrial matrix // inferred from sequence or structural similarity /// 5759 // mitochondrial matrix // non-traceable author statement /// 5739 // mitochondrion // inferred from electronic annotation /// 5759 // mitochondrial matrix // inferred from sequence similarity	IPR002872 // Proline dehydrogenase // 1.0E-126 /// IPR002872 // Proline dehydrogenase // 1.0E-126 /// IPR002872 // Proline dehydrogenase // 1.0E-126
13572	154771_at	-0.620786	3.47362	-14.455	1.94e-15	1.53e-13	25.1622	FBgn0033413	CG8806	prel	preli-like	35969	---	7275 // development // inferred from electronic annotation /// 7498 // mesoderm development // inferred from electronic annotation /// 30097 // hemopoiesis // inferred from electronic annotation	5739 // mitochondrion // inferred from direct assay /// 5739 // mitochondrion // inferred from electronic annotation	IPR006797 // MSF1 // 3.5E-41
163	141362_at	-1.15341	1.79372	-14.3745	2.26e-15	1.74e-13	25.0081	FBgn0035852	CG7387	CG7387	CG7387	38915	51082 // unfolded protein binding // inferred from electronic annotation /// 5515 // protein binding // inferred from physical interaction /// 31072 // heat shock protein binding // inferred from electronic annotation	6457 // protein folding // inferred from electronic annotation /// 6950 // response to stress // inferred from electronic annotation /// 6952 // defense response // inferred from electronic annotation /// 19538 // protein metabolism // inferred from electronic annotation /// 6986 // response to unfolded protein // inferred from electronic annotation	---	IPR001623 // Heat shock protein DnaJ, N-terminal // 3.0E-25 /// IPR002939 // Chaperone DnaJ, C-terminal // 9.2E-27
13946	155145_at	-0.95799	3.17435	-14.3397	2.42e-15	1.85e-13	24.9412	FBgn0028336	CG4094	l(1)G0255	lethal (1) G0255	31605	4333 // fumarate hydratase activity // inferred from sequence or structural similarity /// 3824 // catalytic activity // inferred from electronic annotation /// 4333 // fumarate hydratase activity // inferred from electronic annotation /// 16829 // lyase activity // inferred from electronic annotation /// 4333 // fumarate hydratase activity // inferred from sequence similarity	6099 // tricarboxylic acid cycle // inferred from sequence or structural similarity /// 6106 // fumarate metabolism // inferred from electronic annotation /// 6099 // tricarboxylic acid cycle // inferred from electronic annotation /// 6099 // tricarboxylic acid cycle // inferred from sequence similarity	5737 // cytoplasm // inferred from sequence or structural similarity /// 5739 // mitochondrion // inferred from sequence or structural similarity /// 45239 // tricarboxylic acid cycle enzyme complex // inferred from electronic annotation /// 5737 // cytoplasm // inferred from sequence similarity /// 5739 // mitochondrion // inferred from sequence similarity	IPR000362 // Fumarate lyase // 1.0E-126 /// IPR000362 // Fumarate lyase // 1.0E-126
8674	149873_at	-1.44731	4.32827	-14.3147	2.54e-15	1.92e-13	24.8931	FBgn0038200	CG9920	CG9920	CG9920	41712	5524 // ATP binding // inferred from electronic annotation /// 51082 // unfolded protein binding // inferred from sequence or structural similarity /// 51082 // unfolded protein binding // inferred from electronic annotation /// 51082 // unfolded protein binding // inferred from sequence similarity	6457 // protein folding // inferred from sequence or structural similarity /// 6458 // 'de novo' protein folding // inferred from sequence or structural similarity /// 6457 // protein folding // inferred from electronic annotation /// 6457 // protein folding // inferred from sequence similarity /// 6458 // 'de novo' protein folding // inferred from sequence similarity	5759 // mitochondrial matrix // inferred from sequence or structural similarity /// 5759 // mitochondrial matrix // inferred from sequence similarity	IPR001476 // Chaperonin Cpn10 // 1.5E-34
11123	152322_at	-1.53617	3.21958	-14.3172	2.52e-15	1.92e-13	24.8979	FBgn0035198	CG9130 /// CG9133	CG9133	CG9133	3772453	---	---	---	---
5354	146553_at	-0.82413	1.01523	-14.3032	2.59e-15	1.95e-13	24.871	FBgn0032888	CG14405	CheB38c	CheB38c	35346	5272 // sodium channel activity // inferred from electronic annotation	6814 // sodium ion transport // inferred from electronic annotation	16020 // membrane // inferred from electronic annotation	---
1192	142391_at	-1.53962	3.90059	-14.2346	2.96e-15	2.2e-13	24.7385	FBgn0031859	CG17377	CG17377	CG17377	33954	5102 // receptor binding // traceable author statement /// 5125 // cytokine activity // traceable author statement /// 5102 // receptor binding // non-traceable author statement /// 16015 // morphogen activity // non-traceable author statement	7298 // border follicle cell migration (sensu Insecta) // inferred from mutant phenotype /// 7440 // foregut morphogenesis // inferred from mutant phenotype /// 7442 // hindgut morphogenesis // inferred from mutant phenotype /// 7538 // primary sex determination // inferred from mutant phenotype /// 17145 // stem cell division // inferred from mutant phenotype /// 30707 // ovarian follicle cell d…	5576 // extracellular region // traceable author statement /// 5578 // extracellular matrix (sensu Metazoa) // traceable author statement	---
11351	152550_at	-1.268	2.83225	-14.2128	3.08e-15	2.29e-13	24.6963	FBgn0038598	CG7131	CG7131	CG7131	42197	---	---	---	---
11134	152333_at	-1.36763	3.92807	-14.1684	3.36e-15	2.46e-13	24.6102	FBgn0003435	CG9218	sm	smooth	37254	3729 // mRNA binding // inferred from sequence or structural similarity /// 5515 // protein binding // inferred from physical interaction /// 166 // nucleotide binding // inferred from electronic annotation /// 3676 // nucleic acid binding // inferred from electronic annotation /// 3723 // RNA binding // inferred from electronic annotation /// 3729 // mRNA binding // inferred from sequence simila…	6397 // mRNA processing // inferred from electronic annotation	5634 // nucleus // inferred from electronic annotation /// 30529 // ribonucleoprotein complex // non-traceable author statement	---
10336	151535_at	-1.04987	1.75939	-14.1623	3.4e-15	2.48e-13	24.5983	FBgn0046793	CG32236	CG32236	CG32236	249170	4867 // serine-type endopeptidase inhibitor activity // inferred from electronic annotation	19226 // transmission of nerve impulse // inferred from mutant phenotype /// 6457 // protein folding // inferred from electronic annotation	---	IPR002130 // Peptidyl-prolyl cis-trans isomerase, cyclophilin type // 8.8E-5
10807	152006_at	-2.21575	3.71831	-14.0641	4.11e-15	2.98e-13	24.4073	FBgn0035670	CG10472	CG10472	CG10472	38688	4252 // serine-type endopeptidase activity // inferred from sequence or structural similarity /// 4263 // chymotrypsin activity // non-traceable author statement /// 4295 // trypsin activity // inferred from electronic annotation /// 5515 // protein binding // inferred from physical interaction /// 4252 // serine-type endopeptidase activity // inferred from electronic annotation /// 8233 // pepti…	6508 // proteolysis // non-traceable author statement /// 6508 // proteolysis // inferred from electronic annotation	---	IPR001254 // Peptidase S1, chymotrypsin // 2.5E-70
8712	149911_at	-1.59632	1.48566	-14.014	4.53e-15	3.23e-13	24.3092	FBgn0038248	CG7886	CG7886	CG7886	41775	---	---	---	---
1747	142946_at	-1.04793	2.18	-13.97	4.93e-15	3.47e-13	24.223	FBgn0020129	CG12240	DnaJ-60	DnaJ-like-60	37869	51082 // unfolded protein binding // inferred from sequence or structural similarity /// 31072 // heat shock protein binding // inferred from electronic annotation /// 51082 // unfolded protein binding // inferred from sequence similarity	6457 // protein folding // inferred from sequence or structural similarity /// 7283 // spermatogenesis // non-traceable author statement /// 6457 // protein folding // inferred from sequence similarity	---	IPR001623 // Heat shock protein DnaJ, N-terminal // 2.0E-21
13582	154781_at	-0.98785	1.57245	-13.9588	5.04e-15	3.52e-13	24.2011	FBgn0043792	CG30427	CG30427	CG30427	37986	16491 // oxidoreductase activity // inferred from electronic annotation	---	---	IPR004262 // Male sterility protein // 5.6E-100
5894	147093_at	-1.96076	2.05697	-13.9189	5.45e-15	3.77e-13	24.1227	FBgn0033733	CG8834	CG8834	CG8834	36356	16207 // 4-coumarate-CoA ligase activity // inferred from sequence or structural similarity /// 16874 // ligase activity // inferred from electronic annotation /// 16207 // 4-coumarate-CoA ligase activity // inferred from sequence similarity	8152 // metabolism // inferred from electronic annotation	---	IPR000873 // AMP-dependent synthetase and ligase // 5.9E-85
11117	152316_at	-0.569015	0.379275	-13.9174	5.47e-15	3.77e-13	24.1198	FBgn0037023	CG3698	CG3698	CG3698	40298	---	---	---	---
5018	146217_at	-0.97866	1.11728	-13.8718	5.98e-15	4.1e-13	24.03	FBgn0040096	CG16834	lectin-33A	lectin-33A	53516	5534 // galactose binding // inferred from sequence or structural similarity /// 5529 // sugar binding // inferred from electronic annotation /// 5534 // galactose binding // inferred from sequence similarity	---	---	IPR001304 // C-type lectin // 1.0E-4
4720	145919_at	-1.32194	2.25546	-13.8475	6.27e-15	4.28e-13	23.982	FBgn0031849	CG11327	CG11327	CG11327	33940	---	---	---	---
6351	147550_at	-1.0601	3.43852	-13.8307	6.48e-15	4.38e-13	23.9488	FBgn0034515	CG13428	CG13428	CG13428	37317	5515 // protein binding // inferred from physical interaction	---	---	---
2628	143827_at	-1.32079	2.10335	-13.8204	6.61e-15	4.45e-13	23.9285	FBgn0015586	CG3801	Acp76A	Accessory gland-specific peptide 76A	40078	4867 // serine-type endopeptidase inhibitor activity // inferred from sequence or structural similarity /// 42562 // hormone binding // inferred from sequence or structural similarity /// 4867 // serine-type endopeptidase inhibitor activity // inferred from electronic annotation /// 4867 // serine-type endopeptidase inhibitor activity // inferred from sequence similarity /// 42562 // hormone bind…	45861 // negative regulation of proteolysis // inferred from sequence or structural similarity /// 45861 // negative regulation of proteolysis // inferred from sequence similarity	---	---
13347	154546_at	-0.81333	2.03382	-13.8052	6.81e-15	4.57e-13	23.8983	FBgn0037807	CG6293	CG6293	CG6293	41259	8520 // L-ascorbate:sodium symporter activity // inferred from sequence or structural similarity /// 5515 // protein binding // inferred from physical interaction /// 5215 // transporter activity // inferred from electronic annotation /// 8520 // L-ascorbate:sodium symporter activity // inferred from sequence similarity	6139 // nucleobase, nucleoside, nucleotide and nucleic acid metabolism // inferred from electronic annotation /// 15931 // nucleobase, nucleoside, nucleotide and nucleic acid transport // inferred from electronic annotation /// 6810 // transport // inferred from electronic annotation	16020 // membrane // inferred from electronic annotation	IPR006043 // Xanthine/uracil/vitamin C permease family // 1.6E-87
10986	152185_at	-0.894967	3.0913	-13.7933	6.97e-15	4.64e-13	23.8747	FBgn0039635	CG11876	CG11876	CG11876	43437	3700 // transcription factor activity // inferred from electronic annotation /// 4739 // pyruvate dehydrogenase (acetyl-transferring) activity // inferred from sequence or structural similarity /// 5515 // protein binding // inferred from physical interaction /// 4739 // pyruvate dehydrogenase (acetyl-transferring) activity // inferred from sequence similarity	6090 // pyruvate metabolism // inferred from sequence or structural similarity /// 6099 // tricarboxylic acid cycle // inferred from electronic annotation /// 6355 // regulation of transcription, DNA-dependent // inferred from electronic annotation /// 6090 // pyruvate metabolism // inferred from sequence similarity	45254 // pyruvate dehydrogenase complex // inferred from sequence or structural similarity /// 45254 // pyruvate dehydrogenase complex // inferred from sequence similarity	IPR005476 // Transketolase, C terminal // 4.1E-58 /// IPR005475 // Transketolase, central region // 8.8E-75
11793	152992_at	-1.30603	2.71478	-13.7924	6.98e-15	4.64e-13	23.8729	FBgn0034263	CG10934	CG10934	CG10934	37013	---	---	---	---
12084	153283_at	-0.9317	3.87704	-13.7895	7.02e-15	4.64e-13	23.8673	FBgn0019644	CG8189	ATPsyn-b	ATP synthase, subunit b	39143	8553 // hydrogen-exporting ATPase activity, phosphorylative mechanism // inferred from sequence or structural similarity /// 8553 // hydrogen-exporting ATPase activity, phosphorylative mechanism // non-traceable author statement /// 46933 // hydrogen-transporting ATP synthase activity, rotational mechanism // inferred from electronic annotation /// 46961 // hydrogen-transporting ATPase activity, …	15986 // ATP synthesis coupled proton transport // inferred from electronic annotation /// 15992 // proton transport // inferred from sequence or structural similarity /// 15992 // proton transport // non-traceable author statement /// 6810 // transport // inferred from electronic annotation /// 6811 // ion transport // inferred from electronic annotation /// 15992 // proton transport // inferred…	276 // proton-transporting ATP synthase complex, coupling factor F(o) (sensu Eukaryota) // inferred from sequence or structural similarity /// 16469 // proton-transporting two-sector ATPase complex // inferred from electronic annotation /// 5739 // mitochondrion // inferred from electronic annotation /// 45263 // proton-transporting ATP synthase complex, coupling factor F(o) // inferred from elec…	IPR008688 // Mitochondrial ATP synthase B chain // 5.9E-89 /// IPR008688 // Mitochondrial ATP synthase B chain // 1.0E-126
8213	149412_at	-1.21601	1.93117	-13.7145	8.14e-15	5.36e-13	23.7183	FBgn0037458	CG15180	CG15180	CG15180	40807	5344 // oxygen transporter activity // inferred from electronic annotation /// 5488 // binding // inferred from electronic annotation /// 5506 // iron ion binding // inferred from electronic annotation /// 20037 // heme binding // inferred from electronic annotation /// 46872 // metal ion binding // inferred from electronic annotation	6810 // transport // inferred from electronic annotation /// 15671 // oxygen transport // inferred from electronic annotation	---	---
140	141339_at	-1.43222	5.04194	-13.7006	8.37e-15	5.48e-13	23.6908	FBgn0011823	CG4799	Pen	Pendulin	34338	8320 // protein carrier activity // non-traceable author statement /// 5515 // protein binding // inferred from physical interaction /// 5488 // binding // inferred from electronic annotation /// 8565 // protein transporter activity // inferred from electronic annotation	59 // protein import into nucleus, docking // non-traceable author statement /// 6606 // protein import into nucleus // non-traceable author statement /// 6607 // NLS-bearing substrate import into nucleus // non-traceable author statement /// 7291 // sperm individualization // inferred from mutant phenotype /// 7301 // ovarian ring canal formation // inferred from mutant phenotype /// 7303 // cyt…	5634 // nucleus // non-traceable author statement /// 5643 // nuclear pore // non-traceable author statement /// 5737 // cytoplasm // non-traceable author statement /// 15629 // actin cytoskeleton // non-traceable author statement	IPR000225 // Armadillo // 4.6E-11 /// IPR000225 // Armadillo // 2.0E-13 /// IPR000225 // Armadillo // 3.0E-7 /// IPR000225 // Armadillo // 6.1E-8 /// IPR000225 // Armadillo // 1.5E-12 /// IPR000225 // Armadillo // 8.0E-10 /// IPR002652 // Importin alpha-like protein, beta-binding region // 3.0E-38
10616	151815_at	-1.04631	2.12722	-13.6026	1.02e-14	6.5e-13	23.495	FBgn0037035	CG10589	CG10589	CG10589	40313	5515 // protein binding // inferred from physical interaction	---	---	---
3132	144331_at	-0.984955	0.931323	-13.5892	1.04e-14	6.56e-13	23.4683	FBgn0028949	CG15254	CG15254	CG15254	34915	4222 // metalloendopeptidase activity // inferred from sequence or structural similarity /// 8270 // zinc ion binding // inferred from electronic annotation /// 8533 // astacin activity // inferred from electronic annotation /// 8237 // metallopeptidase activity // inferred from electronic annotation /// 4222 // metalloendopeptidase activity // inferred from sequence similarity	6508 // proteolysis // inferred from electronic annotation	---	IPR001506 // Peptidase M12A, astacin // 5.2E-75
6107	147306_at	-1.07477	2.56302	-13.5895	1.04e-14	6.56e-13	23.469	FBgn0029154 /// FBgn0029153	CG7969 /// CG7964	Menl-1 /// Menl-2	Menl-1 /// Menl-2	3772542 /// 3772692	4473 // malate dehydrogenase (oxaloacetate-decarboxylating) (NADP+) activity // inferred from sequence or structural similarity /// 4473 // malate dehydrogenase (oxaloacetate-decarboxylating) (NADP+) activity // non-traceable author statement /// 4470 // malic enzyme activity // inferred from electronic annotation /// 16491 // oxidoreductase activity // inferred from electronic annotation /// 166…	6108 // malate metabolism // inferred from electronic annotation	5739 // mitochondrion // inferred from sequence or structural similarity /// 5739 // mitochondrion // inferred from sequence similarity	---
7300	148499_at	-1.03035	1.98469	-13.5581	1.11e-14	6.91e-13	23.406	FBgn0036056	CG6709	CG6709	CG6709	39166	---	---	---	---
10641	151840_at	-0.860321	2.38964	-13.5591	1.11e-14	6.91e-13	23.408	FBgn0027615	CG6404	CG6404	CG6404	39222	5386 // carrier activity // inferred from electronic annotation /// 8565 // protein transporter activity // inferred from sequence or structural similarity /// 8565 // protein transporter activity // inferred from sequence similarity	8535 // cytochrome c oxidase complex assembly // inferred from sequence or structural similarity /// 51205 // protein insertion into membrane // inferred from electronic annotation /// 8535 // cytochrome c oxidase complex assembly // inferred from sequence similarity	5740 // mitochondrial envelope // inferred from sequence or structural similarity /// 5743 // mitochondrial inner membrane // inferred from sequence or structural similarity /// 16021 // integral to membrane // inferred from electronic annotation /// 5740 // mitochondrial envelope // inferred from sequence similarity /// 5743 // mitochondrial inner membrane // inferred from sequence similarity	IPR001708 // 60 kDa inner membrane protein // 9.9E-12
11642	152841_at	-1.09949	1.66057	-13.5381	1.16e-14	7.16e-13	23.3658	FBgn0038774	CG5023	CG5023	CG5023	42400	3779 // actin binding // inferred from sequence or structural similarity /// 5200 // structural constituent of cytoskeleton // inferred from electronic annotation /// 3779 // actin binding // inferred from electronic annotation /// 3779 // actin binding // inferred from sequence similarity	6936 // muscle contraction // inferred from electronic annotation /// 6939 // smooth muscle contraction // inferred from electronic annotation /// 31032 // actomyosin structure organization and biogenesis // inferred from electronic annotation	---	IPR001715 // Calponin-like actin-binding // 2.1E-22 /// IPR000557 // Calponin repeat // 8.5E-6
9213	150412_at	-1.39532	1.68184	-13.5277	1.18e-14	7.28e-13	23.3449	FBgn0039040	CG13833	CG13833	CG13833	42718	16491 // oxidoreductase activity // inferred from sequence or structural similarity /// 16491 // oxidoreductase activity // inferred from electronic annotation /// 16491 // oxidoreductase activity // inferred from sequence similarity	7601 // visual perception // inferred from electronic annotation /// 8152 // metabolism // inferred from electronic annotation	---	IPR002198 // Short-chain dehydrogenase/reductase SDR // 1.1E-44
2461	143660_at	-1.37928	1.51962	-13.5132	1.21e-14	7.46e-13	23.3157	FBgn0011555	CG12385	Try	Trypsin	36218	4263 // chymotrypsin activity // inferred from electronic annotation /// 4295 // trypsin activity // inferred from sequence or structural similarity /// 4295 // trypsin activity // non-traceable author statement /// 4252 // serine-type endopeptidase activity // inferred from electronic annotation /// 4295 // trypsin activity // inferred from electronic annotation /// 8233 // peptidase activity //…	6508 // proteolysis // non-traceable author statement /// 6508 // proteolysis // inferred from electronic annotation	5576 // extracellular region // non-traceable author statement	IPR001254 // Peptidase S1, chymotrypsin // 5.3E-85
11614	152813_at	-0.959635	1.46848	-13.5065	1.23e-14	7.53e-13	23.3022	FBgn0031800	CG9497	CG9497	CG9497	33884	16301 // kinase activity // inferred from electronic annotation /// 16740 // transferase activity // inferred from electronic annotation	---	---	IPR004119 // Protein of unknown function DUF227 // 1.8E-85
13070	154269_at	-1.2043	5.35483	-13.4636	1.34e-14	8.17e-13	23.2158	FBgn0010100	CG9244	Acon	Aconitase	44149	3994 // aconitate hydratase activity // inferred from sequence or structural similarity /// 3994 // aconitate hydratase activity // non-traceable author statement /// 3994 // aconitate hydratase activity // inferred from electronic annotation /// 5506 // iron ion binding // inferred from electronic annotation /// 16829 // lyase activity // inferred from electronic annotation /// 16836 // hydro-ly…	6099 // tricarboxylic acid cycle // inferred from electronic annotation /// 8652 // amino acid biosynthesis // inferred from electronic annotation /// 8152 // metabolism // inferred from electronic annotation /// 6118 // electron transport // inferred from electronic annotation	5739 // mitochondrion // inferred from sequence or structural similarity /// 5739 // mitochondrion // non-traceable author statement /// 5739 // mitochondrion // inferred from electronic annotation /// 5739 // mitochondrion // inferred from sequence similarity	IPR000573 // Aconitate hydratase, C-terminal // 3.7E-60 /// IPR001030 // Aconitate hydratase, N-terminal // 1.0E-126
14	141213_at	-0.944783	2.23656	-13.452	1.37e-14	8.31e-13	23.1924	FBgn0033728	CG8505	CG8505	CG8505	36351	5214 // structural constituent of cuticle (sensu Insecta) // inferred from sequence or structural similarity /// 5515 // protein binding // inferred from physical interaction /// 42302 // structural constituent of cuticle // inferred from electronic annotation /// 5214 // structural constituent of cuticle (sensu Insecta) // inferred from sequence similarity	---	---	IPR000618 // Insect cuticle protein // 8.8E-33
11643	152842_at	-1.31731	1.55359	-13.4504	1.38e-14	8.31e-13	23.1893	FBgn0036687	CG6652	CG6652	CG6652	39905	5515 // protein binding // inferred from physical interaction	---	---	---
8197	149396_at	-0.70413	0.79503	-13.4475	1.38e-14	8.32e-13	23.1835	FBgn0037431	CG17917	CG17917	CG17917	40778	1584 // rhodopsin-like receptor activity // inferred from electronic annotation /// 8429 // phosphatidylethanolamine binding // inferred from sequence or structural similarity /// 19210 // kinase inhibitor activity // inferred from electronic annotation /// 8429 // phosphatidylethanolamine binding // inferred from sequence similarity	7165 // signal transduction // inferred from electronic annotation /// 7186 // G-protein coupled receptor protein signaling pathway // inferred from electronic annotation	16021 // integral to membrane // inferred from electronic annotation	IPR008914 // PEBP // 5.7E-47
5201	146400_at	-1.08429	2.32015	-13.4027	1.51e-14	9.07e-13	23.0928	FBgn0032632	CG6380	CG6380	CG6380	35040	4864 // protein phosphatase inhibitor activity // inferred from sequence or structural similarity /// 4864 // protein phosphatase inhibitor activity // inferred from electronic annotation /// 4864 // protein phosphatase inhibitor activity // inferred from sequence similarity	---	---	IPR007062 // Protein phosphatase inhibitor 2 (IPP-2) // 3.4E-80
2697	143896_at	-0.93856	2.79811	-13.3944	1.54e-14	9.18e-13	23.0761	FBgn0017566	CG2286	ND75	NADH:ubiquinone reductase 75kD subunit precursor	31762	3954 // NADH dehydrogenase activity // inferred from sequence or structural similarity /// 3954 // NADH dehydrogenase activity // non-traceable author statement /// 5506 // iron ion binding // inferred from electronic annotation /// 8137 // NADH dehydrogenase (ubiquinone) activity // inferred from sequence or structural similarity /// 8137 // NADH dehydrogenase (ubiquinone) activity // non-tracea…	6120 // mitochondrial electron transport, NADH to ubiquinone // inferred from sequence or structural similarity /// 6120 // mitochondrial electron transport, NADH to ubiquinone // non-traceable author statement /// 6118 // electron transport // inferred from electronic annotation /// 6120 // mitochondrial electron transport, NADH to ubiquinone // inferred from electronic annotation /// 6120 // mi…	5747 // respiratory chain complex I (sensu Eukaryota) // inferred from sequence or structural similarity /// 5747 // respiratory chain complex I (sensu Eukaryota) // non-traceable author statement /// 5739 // mitochondrion // inferred from electronic annotation /// 5747 // respiratory chain complex I (sensu Eukaryota) // inferred from sequence similarity	IPR001041 // Ferredoxin // 4.3E-12 /// IPR006656 // Molybdopterin oxidoreductase // 1.0E-126
216	141415_at	-1.27394	3.4741	-13.362	1.64e-14	9.6e-13	23.0104	FBgn0035047	CG3691	Pof	Painting of fourth	37947	3729 // mRNA binding // inferred from sequence or structural similarity /// 3735 // structural constituent of ribosome // inferred from electronic annotation /// 42802 // identical protein binding // inferred from physical interaction /// 166 // nucleotide binding // inferred from electronic annotation /// 3676 // nucleic acid binding // inferred from electronic annotation /// 3723 // RNA binding…	6412 // protein biosynthesis // inferred from electronic annotation	5694 // chromosome // non-traceable author statement /// 5840 // ribosome // inferred from electronic annotation /// 30849 // autosome // inferred from direct assay /// 5634 // nucleus // inferred from electronic annotation	IPR000504 // RNA-binding region RNP-1 (RNA recognition motif) // 1.6E-8
9241	150440_at	-1.46934	3.56565	-13.3629	1.64e-14	9.6e-13	23.0122	FBgn0039071	CG4434	CG4434	CG4434	42756	4353 // glutamate dehydrogenase [NAD(P)+] activity // inferred from sequence or structural similarity /// 3824 // catalytic activity // inferred from electronic annotation /// 16491 // oxidoreductase activity // inferred from electronic annotation /// 4353 // glutamate dehydrogenase [NAD(P)+] activity // inferred from sequence similarity	19551 // glutamate catabolism to 2-oxoglutarate // inferred from sequence or structural similarity /// 6520 // amino acid metabolism // inferred from electronic annotation /// 19551 // glutamate catabolism to 2-oxoglutarate // inferred from sequence similarity	5759 // mitochondrial matrix // inferred from sequence or structural similarity /// 5759 // mitochondrial matrix // inferred from sequence similarity	IPR006096 // Glu/Leu/Phe/Val dehydrogenase, C terminal // 1.6E-111 /// IPR006097 // Glu/Leu/Phe/Val dehydrogenase, dimerisation domain // 4.7E-49
10997	152196_at	-0.891245	1.82689	-13.3668	1.63e-14	9.6e-13	23.0201	FBgn0027562	CG10345	CG10345	CG10345	42017	5044 // scavenger receptor activity // non-traceable author statement	6915 // apoptosis // inferred from electronic annotation /// 6952 // defense response // non-traceable author statement /// 7155 // cell adhesion // inferred from electronic annotation	5887 // integral to plasma membrane // non-traceable author statement /// 16020 // membrane // inferred from electronic annotation	IPR002159 // CD36 antigen // 1.8E-30 /// IPR002159 // CD36 antigen // 2.3E-21
11160	152359_at	-1.54686	1.47372	-13.3653	1.63e-14	9.6e-13	23.0172	FBgn0031724	CG18266	CG18266	CG18266	33792	5515 // protein binding // inferred from physical interaction	---	---	---
7243	148442_at	-1.3141	1.23639	-13.3394	1.72e-14	9.96e-13	22.9645	FBgn0035957	CG5144	CG5144	CG5144	39040	4054 // arginine kinase activity // inferred from sequence or structural similarity /// 16301 // kinase activity // inferred from electronic annotation /// 16740 // transferase activity // inferred from electronic annotation /// 16772 // transferase activity, transferring phosphorus-containing groups // inferred from electronic annotation /// 4054 // arginine kinase activity // inferred from sequ…	---	---	IPR000749 // ATP:guanido phosphotransferase // 1.2E-28 /// IPR000749 // ATP:guanido phosphotransferase // 1.0E-126
5145	146344_at	-0.945501	1.36396	-13.3268	1.76e-14	1.02e-12	22.9389	FBgn0032530	CG9263	CG9263	CG9263	34770	3824 // catalytic activity // inferred from electronic annotation	6629 // lipid metabolism // inferred from electronic annotation /// 7548 // sex differentiation // traceable author statement /// 7548 // sex differentiation // non-traceable author statement	5576 // extracellular region // traceable author statement	---
11284	152483_at	-0.847427	5.13612	-13.3254	1.77e-14	1.02e-12	22.9361	FBgn0035915	CG6372	CG6372	CG6372	38986	4178 // leucyl aminopeptidase activity // inferred from sequence or structural similarity /// 4177 // aminopeptidase activity // inferred from electronic annotation /// 4178 // leucyl aminopeptidase activity // inferred from sequence similarity	6508 // proteolysis // inferred from electronic annotation	5622 // intracellular // inferred from electronic annotation	IPR008283 // Peptidase M17, cytosol aminopeptidase, N-terminal // 7.1E-54 /// IPR000819 // Peptidase M17, cytosol aminopeptidase, C-terminal // 1.5E-93
9615	150814_at	-0.862621	1.52138	-13.274	1.96e-14	1.12e-12	22.8316	FBgn0039651	CG14508	CG14508	CG14508	43457	16491 // oxidoreductase activity // inferred from electronic annotation /// 45153 // electron transporter, transferring electrons within CoQH2-cytochrome c reductase complex activity // inferred from sequence or structural similarity /// 5515 // protein binding // inferred from physical interaction /// 20037 // heme binding // inferred from electronic annotation /// 45153 // electron transporter,…	6119 // oxidative phosphorylation // inferred from sequence or structural similarity /// 6122 // mitochondrial electron transport, ubiquinol to cytochrome c // inferred from sequence or structural similarity /// 6118 // electron transport // inferred from electronic annotation /// 6119 // oxidative phosphorylation // inferred from sequence similarity /// 6122 // mitochondrial electron transport, …	5750 // respiratory chain complex III (sensu Eukaryota) // inferred from sequence or structural similarity /// 5746 // mitochondrial electron transport chain // inferred from electronic annotation /// 5750 // respiratory chain complex III (sensu Eukaryota) // inferred from sequence similarity	IPR002326 // Cytochrome c1 // 4.9E-113
6292	147491_at	-0.926195	4.03058	-13.2629	2.01e-14	1.14e-12	22.809	FBgn0034435	CG9975	CG9975	CG9975	37220	---	---	---	---
11511	152710_at	-1.10763	1.98192	-13.2356	2.12e-14	1.19e-12	22.7533	FBgn0050350	CG30350	CG30350	CG30350	246556	5515 // protein binding // inferred from electronic annotation	7520 // myoblast fusion // inferred from mutant phenotype /// 7523 // larval visceral muscle development // inferred from mutant phenotype /// 6457 // protein folding // inferred from electronic annotation /// 7155 // cell adhesion // inferred from electronic annotation /// 7520 // myoblast fusion // traceable author statement	5886 // plasma membrane // inferred from direct assay /// 16020 // membrane // inferred from electronic annotation	---
7794	148993_at	-0.9453	1.6425	-13.228	2.15e-14	1.21e-12	22.7377	FBgn0036785	CG13700	CG13700	CG13700	40013	---	---	---	---
2703	143902_at	-1.21367	5.18039	-13.2117	2.23e-14	1.24e-12	22.7043	FBgn0019828	CG1980	dj	don juan	40838	3677 // DNA binding // non-traceable author statement	7283 // spermatogenesis // traceable author statement /// 7286 // spermatid development // non-traceable author statement /// 7291 // sperm individualization // inferred from expression pattern	5634 // nucleus // inferred from direct assay /// 5634 // nucleus // non-traceable author statement /// 5739 // mitochondrion // non-traceable author statement /// 9434 // flagellum (sensu Eukaryota) // inferred from direct assay /// 16007 // mitochondrial derivative // inferred from direct assay /// 5634 // nucleus // inferred from electronic annotation /// 5739 // mitochondrion // inferred from…	---
6546	147745_at	-0.802338	1.31056	-13.1995	2.28e-14	1.26e-12	22.6794	FBgn0034824	CG3219	Klp59C	Klp59C	37671	3774 // motor activity // inferred from direct assay /// 3777 // microtubule motor activity // inferred from sequence or structural similarity /// 5200 // structural constituent of cytoskeleton // inferred from electronic annotation /// 5524 // ATP binding // inferred from electronic annotation /// 166 // nucleotide binding // inferred from electronic annotation /// 3774 // motor activity // infe…	70 // mitotic sister chromatid segregation // inferred from mutant phenotype /// 6605 // protein targeting // inferred from electronic annotation /// 7018 // microtubule-based movement // inferred from sequence or structural similarity /// 7018 // microtubule-based movement // inferred from electronic annotation /// 7018 // microtubule-based movement // inferred from sequence similarity	5828 // kinetochore microtubule // inferred from direct assay /// 5871 // kinesin complex // inferred from sequence or structural similarity /// 5874 // microtubule // inferred from electronic annotation /// 5875 // microtubule associated complex // inferred from electronic annotation /// 5871 // kinesin complex // inferred from sequence similarity	IPR001752 // Kinesin, motor region // 1.0E-126
11337	152536_at	-0.977559	2.22469	-13.2012	2.27e-14	1.26e-12	22.6828	FBgn0034173	CG9010	CG9010	CG9010	36904	4365 // glyceraldehyde-3-phosphate dehydrogenase (phosphorylating) activity // inferred from sequence or structural similarity /// 4365 // glyceraldehyde-3-phosphate dehydrogenase (phosphorylating) activity // inferred from electronic annotation /// 8943 // glyceraldehyde-3-phosphate dehydrogenase activity // inferred from electronic annotation /// 16491 // oxidoreductase activity // inferred fro…	6096 // glycolysis // inferred from electronic annotation /// 6006 // glucose metabolism // inferred from electronic annotation	---	IPR000173 // Glyceraldehyde 3-phosphate dehydrogenase // 4.1E-109 /// IPR000173 // Glyceraldehyde 3-phosphate dehydrogenase // 1.5E-119
4633	145832_at	-0.724605	1.2429	-13.1937	2.31e-14	1.26e-12	22.6675	FBgn0031720	CG14013	CG14013	CG14013	33786	---	---	---	---
7474	148673_at	-0.733899	1.68425	-13.1949	2.3e-14	1.26e-12	22.67	FBgn0036310	CG10969	CG10969	CG10969	39451	---	---	---	---
11070	152269_at	-0.804933	1.95814	-13.1869	2.34e-14	1.28e-12	22.6537	FBgn0030883	CG7772	CG7772	CG7772	32776	---	---	---	---
11801	153000_at	-0.937338	0.800974	-13.1648	2.45e-14	1.32e-12	22.6085	FBgn0035241	CG12105	CG12105	CG12105	38190	---	---	---	---
10117	151316_at	-0.668587	0.795811	-13.1511	2.52e-14	1.35e-12	22.5803	FBgn0040843	CG15213	CG15213	CG15213	50316	---	---	---	---
11429	152628_at	-1.11238	3.16672	-13.1015	2.79e-14	1.47e-12	22.4785	FBgn0029947	CG1999	CG1999	CG1999	31671	---	---	---	---
11314	152513_at	-1.28374	2.67424	-13.0795	2.91e-14	1.52e-12	22.4331	FBgn0039311	CG10513	CG10513	CG10513	43051	16301 // kinase activity // inferred from electronic annotation /// 16740 // transferase activity // inferred from electronic annotation	---	---	IPR004119 // Protein of unknown function DUF227 // 5.7E-122
7977	149176_at	-1.34913	2.41225	-13.061	3.03e-14	1.56e-12	22.395	FBgn0052436	CG32436	CG32436	CG32436	40362	---	---	---	---
11623	152822_at	-0.928197	2.42746	-13.0345	3.19e-14	1.65e-12	22.3404	FBgn0029891	CG4523	CG4523	CG4523	31607	4672 // protein kinase activity // non-traceable author statement /// 4674 // protein serine/threonine kinase activity // inferred from electronic annotation /// 5524 // ATP binding // inferred from electronic annotation /// 166 // nucleotide binding // inferred from electronic annotation /// 4672 // protein kinase activity // inferred from electronic annotation /// 16301 // kinase activity // in…	6468 // protein amino acid phosphorylation // inferred from electronic annotation	---	IPR000719 // Protein kinase // 3.5E-14 /// IPR000719 // Protein kinase // 9.3E-10
2673	143872_at	-1.21009	1.9203	-13.0271	3.24e-14	1.66e-12	22.3251	FBgn0016123	CG1462	Aph-4	Alkaline phosphatase 4	43671	4035 // alkaline phosphatase activity // inferred from sequence or structural similarity /// 4035 // alkaline phosphatase activity // non-traceable author statement /// 19204 // nucleotide phosphatase activity // inferred from electronic annotation /// 287 // magnesium ion binding // inferred from electronic annotation /// 4035 // alkaline phosphatase activity // inferred from electronic annotati…	1501 // skeletal development // inferred from electronic annotation /// 7399 // nervous system development // inferred from expression pattern /// 7498 // mesoderm development // inferred from electronic annotation /// 8152 // metabolism // inferred from electronic annotation /// 42045 // epithelial fluid transport // inferred from mutant phenotype	46658 // anchored to plasma membrane // inferred from sequence or structural similarity /// 16020 // membrane // inferred from electronic annotation /// 16021 // integral to membrane // inferred from electronic annotation /// 46658 // anchored to plasma membrane // inferred from sequence similarity	IPR001952 // Alkaline phosphatase // 3.0E-77 /// IPR001952 // Alkaline phosphatase // 9.8E-89
12651	153850_at	-1.17961	3.64567	-13.0053	3.39e-14	1.73e-12	22.2801	FBgn0038100	CG12358	Paip2	polyA-binding protein interacting protein 2	41591	5515 // protein binding // inferred from physical interaction	1558 // regulation of cell growth // inferred from mutant phenotype /// 16478 // negative regulation of translation // inferred from direct assay /// 16478 // negative regulation of translation // inferred from sequence or structural similarity /// 16478 // negative regulation of translation // inferred from sequence similarity	---	---
238	141437_at	-1.10413	1.29215	-12.9487	3.81e-14	1.93e-12	22.1627	FBgn0036975	CG5618	CG5618	CG5618	40241	4782 // sulfinoalanine decarboxylase activity // inferred from sequence or structural similarity /// 17039 // dipeptidyl-peptidase III activity // inferred from electronic annotation /// 5515 // protein binding // inferred from physical interaction /// 16829 // lyase activity // inferred from electronic annotation /// 16831 // carboxy-lyase activity // inferred from electronic annotation /// 4782…	6508 // proteolysis // inferred from electronic annotation /// 6520 // amino acid metabolism // inferred from electronic annotation /// 6790 // sulfur metabolism // inferred from electronic annotation /// 7268 // synaptic transmission // inferred from electronic annotation /// 19752 // carboxylic acid metabolism // inferred from electronic annotation	5737 // cytoplasm // inferred from electronic annotation	IPR002129 // Pyridoxal-dependent decarboxylase // 1.3E-96 /// IPR002129 // Pyridoxal-dependent decarboxylase // 1.5E-80
11190	152389_at	-1.2208	2.08584	-12.9503	3.8e-14	1.93e-12	22.1662	FBgn0038208	CG14355	CG14355	CG14355	41723	---	---	---	---
9694	150893_f_at	-2.17596	4.23988	-12.9399	3.88e-14	1.96e-12	22.1446	FBgn0039778 /// FBgn0039777	CG2229 /// CG18030	Jon99Fi /// Jon99Fii	Jonah 99Fi /// Jonah 99Fii	43621 /// 43622	4252 // serine-type endopeptidase activity // inferred from sequence or structural similarity /// 4263 // chymotrypsin activity // inferred from electronic annotation /// 4295 // trypsin activity // inferred from electronic annotation /// 42708 // elastase activity // non-traceable author statement /// 3700 // transcription factor activity // inferred from mutant phenotype /// 4252 // serine-type…	6508 // proteolysis // non-traceable author statement /// 2168 // larval development (sensu Insecta) // inferred from mutant phenotype /// 7591 // molting cycle (sensu Insecta) // inferred from mutant phenotype /// 6508 // proteolysis // inferred from electronic annotation	5634 // nucleus // inferred from direct assay	IPR001254 // Peptidase S1, chymotrypsin // 8.0E-56 /// IPR001254 // Peptidase S1, chymotrypsin // 3.7E-55
6944	148143_at	-1.5145	3.42487	-12.9015	4.2e-14	2.11e-12	22.0647	FBgn0035491	CG11591	CG11591	CG11591	38480	5515 // protein binding // inferred from physical interaction	---	---	IPR007858 // Dpy-30 // 2.8E-22
10578	151777_at	-0.874526	2.25509	-12.8937	4.27e-14	2.14e-12	22.0486	FBgn0039379	CG5886	CG5886	CG5886	43125	---	---	---	---
4326	145525_at	-1.09999	1.97388	-12.8858	4.34e-14	2.16e-12	22.032	FBgn0031247	CG11562	CG11562	CG11562	33200	---	---	---	---
7280	148479_at	-1.56213	0.527605	-12.8756	4.43e-14	2.2e-12	22.0109	FBgn0036023	CG18179	CG18179	CG18179	39124	4263 // chymotrypsin activity // non-traceable author statement /// 4295 // trypsin activity // inferred from electronic annotation /// 4252 // serine-type endopeptidase activity // inferred from electronic annotation /// 8233 // peptidase activity // inferred from electronic annotation /// 16787 // hydrolase activity // inferred from electronic annotation	6508 // proteolysis // non-traceable author statement /// 6508 // proteolysis // inferred from electronic annotation	---	IPR001254 // Peptidase S1, chymotrypsin // 2.2E-47
7601	148800_at	-0.827131	0.889123	-12.8583	4.59e-14	2.26e-12	21.9747	FBgn0036495	CG33259	CG33259	CG33259	2768950	---	---	---	IPR002919 // Trypsin inhibitor-like, cysteine-rich TIL region // 1.0E-17
5594	146793_at	-1.6574	1.90285	-12.8392	4.78e-14	2.34e-12	21.935	FBgn0033274	CG14757	CG14757	CG14757	35797	---	---	---	IPR005631 // Protein of unknown function DUF339 // 1.2E-39
6036	147235_at	-1.33703	1.98876	-12.8241	4.93e-14	2.4e-12	21.9035	FBgn0033999	CG8093	CG8093	CG8093	36686	4806 // triacylglycerol lipase activity // inferred from sequence or structural similarity /// 16298 // lipase activity // inferred from sequence or structural similarity /// 5515 // protein binding // inferred from physical interaction /// 3824 // catalytic activity // inferred from electronic annotation /// 16787 // hydrolase activity // inferred from electronic annotation /// 16789 // carboxyl…	6629 // lipid metabolism // inferred from electronic annotation /// 6629 // lipid metabolism // inferred from sequence or structural similarity /// 16042 // lipid catabolism // inferred from electronic annotation /// 6629 // lipid metabolism // inferred from sequence similarity	---	IPR006693 // Ab-hydrolase associated lipase region // 2.1E-27
6920	148119_at	-1.25011	2.38755	-12.7952	5.23e-14	2.53e-12	21.843	FBgn0035455	CG10862	CG10862	CG10862	38437	4840 // ubiquitin conjugating enzyme activity // inferred from sequence or structural similarity /// 16874 // ligase activity // inferred from electronic annotation /// 4840 // ubiquitin conjugating enzyme activity // inferred from sequence similarity	6464 // protein modification // inferred from electronic annotation /// 6512 // ubiquitin cycle // inferred from electronic annotation /// 19538 // protein metabolism // inferred from electronic annotation	---	IPR000608 // Ubiquitin-conjugating enzymes // 2.7E-62
12791	153990_at	-0.949099	4.23726	-12.7866	5.33e-14	2.56e-12	21.825	FBgn0010226	CG8938	GstS1	Glutathione S transferase S1	36927	4364 // glutathione transferase activity // inferred from direct assay /// 4364 // glutathione transferase activity // inferred from sequence or structural similarity /// 4364 // glutathione transferase activity // non-traceable author statement /// 4602 // glutathione peroxidase activity // inferred from direct assay /// 4364 // glutathione transferase activity // inferred from electronic annota…	6936 // muscle contraction // inferred from electronic annotation /// 6952 // defense response // inferred from electronic annotation /// 6979 // response to oxidative stress // non-traceable author statement /// 7010 // cytoskeleton organization and biogenesis // inferred from electronic annotation /// 9636 // response to toxin // inferred from electronic annotation	---	IPR004046 // Glutathione S-transferase, C-terminal // 6.7E-19 /// IPR004045 // Glutathione S-transferase, N-terminal // 1.7E-21
13354	154553_at	-0.973433	2.39311	-12.7746	5.46e-14	2.62e-12	21.7999	FBgn0038296	CG6752	CG6752	CG6752	41826	4842 // ubiquitin-protein ligase activity // inferred from electronic annotation /// 8270 // zinc ion binding // inferred from electronic annotation /// 5515 // protein binding // inferred from electronic annotation /// 46872 // metal ion binding // inferred from electronic annotation	16567 // protein ubiquitination // inferred from electronic annotation /// 6512 // ubiquitin cycle // inferred from electronic annotation	151 // ubiquitin ligase complex // inferred from electronic annotation /// 5634 // nucleus // inferred from electronic annotation	IPR003877 // SPla/RYanodine receptor SPRY // 3.4E-37 /// IPR001841 // Zn-finger, RING // 5.4E-7
8992	150191_at	-1.09423	1.62933	-12.7422	5.84e-14	2.79e-12	21.732	FBgn0038700	CG3734	CG3734	CG3734	42318	8236 // serine-type peptidase activity // inferred from sequence or structural similarity /// 3824 // catalytic activity // inferred from electronic annotation /// 8233 // peptidase activity // inferred from electronic annotation /// 8236 // serine-type peptidase activity // inferred from electronic annotation /// 8236 // serine-type peptidase activity // inferred from sequence similarity	6508 // proteolysis // inferred from electronic annotation	5764 // lysosome // inferred from electronic annotation	IPR008758 // Peptidase S28 // 1.0E-126
6127	147326_at	-0.674898	0.748117	-12.7099	6.25e-14	2.97e-12	21.6641	FBgn0034151	CG15617	CG15617	CG15617	36871	5515 // protein binding // inferred from electronic annotation	---	---	IPR001478 // PDZ/DHR/GLGF domain // 6.1E-6
3409	144608_at	-0.991727	3.20471	-12.7076	6.28e-14	2.97e-12	21.6594	FBgn0029888	CG3192	CG3192	CG3192	31604	3954 // NADH dehydrogenase activity // inferred from sequence or structural similarity /// 8137 // NADH dehydrogenase (ubiquinone) activity // inferred from sequence or structural similarity /// 3954 // NADH dehydrogenase activity // inferred from sequence similarity /// 8137 // NADH dehydrogenase (ubiquinone) activity // inferred from sequence similarity	6120 // mitochondrial electron transport, NADH to ubiquinone // inferred from sequence or structural similarity /// 6120 // mitochondrial electron transport, NADH to ubiquinone // inferred from sequence similarity	5747 // respiratory chain complex I (sensu Eukaryota) // inferred from sequence or structural similarity /// 5747 // respiratory chain complex I (sensu Eukaryota) // inferred from sequence similarity	IPR008699 // NADH-ubiquinone oxidoreductase ASHI subunit // 4.1E-24
5325	146524_at	-0.937339	2.03095	-12.6775	6.68e-14	3.14e-12	21.5961	FBgn0032834	CG13965	CG13965	CG13965	35280	---	---	---	---
9781	150980_at	-0.993193	4.19458	-12.6597	6.93e-14	3.25e-12	21.5586	FBgn0039909	CG1970	CG1970	CG1970	43798	3954 // NADH dehydrogenase activity // inferred from sequence or structural similarity /// 8137 // NADH dehydrogenase (ubiquinone) activity // inferred from sequence or structural similarity /// 3954 // NADH dehydrogenase activity // inferred from sequence similarity /// 8137 // NADH dehydrogenase (ubiquinone) activity // inferred from sequence similarity	6120 // mitochondrial electron transport, NADH to ubiquinone // inferred from sequence or structural similarity /// 6120 // mitochondrial electron transport, NADH to ubiquinone // inferred from sequence similarity	5747 // respiratory chain complex I (sensu Eukaryota) // inferred from sequence or structural similarity /// 5747 // respiratory chain complex I (sensu Eukaryota) // inferred from sequence similarity	IPR001135 // NADH-ubiquinone oxidoreductase, chain 49kDa // 1.0E-126
4578	145777_at	-0.963352	1.63003	-12.6312	7.36e-14	3.44e-12	21.4985	FBgn0031626	CG15631	CG15631	CG15631	33675	---	---	---	---
12996	154195_at	-2.06645	3.74232	-12.6236	7.48e-14	3.48e-12	21.4824	FBgn0014028	CG3283	SdhB	Succinate dehydrogenase B	35590	5506 // iron ion binding // inferred from electronic annotation /// 8177 // succinate dehydrogenase (ubiquinone) activity // inferred from sequence or structural similarity /// 8177 // succinate dehydrogenase (ubiquinone) activity // non-traceable author statement /// 8177 // succinate dehydrogenase (ubiquinone) activity // inferred from electronic annotation /// 16491 // oxidoreductase activity …	6099 // tricarboxylic acid cycle // inferred from sequence or structural similarity /// 6099 // tricarboxylic acid cycle // non-traceable author statement /// 6118 // electron transport // inferred from electronic annotation /// 6099 // tricarboxylic acid cycle // inferred from electronic annotation /// 6810 // transport // inferred from electronic annotation /// 6099 // tricarboxylic acid cycle …	5749 // respiratory chain complex II (sensu Eukaryota) // inferred from sequence or structural similarity /// 5749 // respiratory chain complex II (sensu Eukaryota) // non-traceable author statement /// 5739 // mitochondrion // inferred from electronic annotation /// 16020 // membrane // inferred from electronic annotation /// 5749 // respiratory chain complex II (sensu Eukaryota) // inferred fro…	---
5107	146306_at	-1.19605	1.86175	-12.6174	7.58e-14	3.51e-12	21.4693	FBgn0032464	CG5075	CG5075	CG5075	34695	5524 // ATP binding // inferred from electronic annotation /// 8553 // hydrogen-exporting ATPase activity, phosphorylative mechanism // inferred from sequence or structural similarity /// 46933 // hydrogen-transporting ATP synthase activity, rotational mechanism // inferred from electronic annotation /// 46961 // hydrogen-transporting ATPase activity, rotational mechanism // inferred from electro…	6144 // purine base metabolism // inferred from electronic annotation /// 6754 // ATP biosynthesis // inferred from electronic annotation /// 6812 // cation transport // inferred from electronic annotation /// 15986 // ATP synthesis coupled proton transport // inferred from electronic annotation /// 6810 // transport // inferred from electronic annotation /// 6811 // ion transport // inferred fro…	221 // hydrogen-transporting ATPase V1 domain // inferred from sequence or structural similarity /// 16469 // proton-transporting two-sector ATPase complex // inferred from electronic annotation /// 221 // hydrogen-transporting ATPase V1 domain // inferred from sequence similarity	IPR004100 // H+-transporting two-sector ATPase, alpha/beta subunit, N-terminal // 1.1E-21 /// IPR000194 // H+-transporting two-sector ATPase, alpha/beta subunit, central region // 5.9E-85 /// IPR000793 // H+-transporting two-sector ATPase, alpha/beta subunit, C-terminal // 2.1E-48
172	141371_at	-1.42447	2.15871	-12.6069	7.75e-14	3.58e-12	21.447	FBgn0000408	CG13263	Cyt-c-d	Cytochrome c distal	34995	16491 // oxidoreductase activity // inferred from electronic annotation /// 45155 // electron transporter, transferring electrons from CoQH2-cytochrome c reductase complex and cytochrome c oxidase complex activity // inferred from sequence or structural similarity /// 5506 // iron ion binding // inferred from electronic annotation /// 20037 // heme binding // inferred from electronic annotation /…	6118 // electron transport // inferred from sequence or structural similarity /// 6118 // electron transport // non-traceable author statement /// 6119 // oxidative phosphorylation // inferred from sequence or structural similarity /// 6919 // caspase activation // inferred from mutant phenotype /// 7291 // sperm individualization // inferred from mutant phenotype /// 6118 // electron transport /…	5739 // mitochondrion // inferred from direct assay /// 5743 // mitochondrial inner membrane // inferred from sequence or structural similarity /// 5759 // mitochondrial matrix // inferred from sequence or structural similarity /// 5759 // mitochondrial matrix // non-traceable author statement /// 5739 // mitochondrion // inferred from electronic annotation /// 5746 // mitochondrial electron tran…	IPR003088 // Cytochrome c, class I // 2.5E-40
12195	153394_at	-1.03543	1.80289	-12.5904	8.02e-14	3.68e-12	21.4122	FBgn0036783	CG7313	CheA75a	CheA75a	40011	---	---	---	---
7959	149158_at	-1.2024	1.84859	-12.5812	8.17e-14	3.74e-12	21.3926	FBgn0037040	CG12983	CG12983	CG12983	40319	---	---	---	---
7979	149178_at	-0.968899	2.10715	-12.5772	8.24e-14	3.75e-12	21.3843	FBgn0052440	CG32440	CG32440	CG32440	318030	---	---	---	---
6777	147976_at	-0.79729	1.52161	-12.5675	8.41e-14	3.79e-12	21.3638	FBgn0035218	CG9173	CG9173	CG9173	38165	---	---	---	---
1128	142327_at	-1.55417	2.17946	-12.5505	8.72e-14	3.91e-12	21.3277	FBgn0032520	CG10859	CG10859	CG10859	34756	3774 // motor activity // inferred from sequence or structural similarity /// 5200 // structural constituent of cytoskeleton // inferred from electronic annotation /// 42623 // ATPase activity, coupled // inferred from sequence or structural similarity /// 3774 // motor activity // inferred from sequence similarity /// 42623 // ATPase activity, coupled // inferred from sequence similarity	7018 // microtubule-based movement // inferred from sequence or structural similarity /// 7018 // microtubule-based movement // inferred from sequence similarity	5868 // cytoplasmic dynein complex // inferred from sequence or structural similarity /// 5875 // microtubule associated complex // inferred from sequence or structural similarity /// 30286 // dynein complex // inferred from sequence or structural similarity /// 5868 // cytoplasmic dynein complex // inferred from sequence similarity /// 5875 // microtubule associated complex // inferred from sequ…	---
7112	148311_f_at	-1.17617	1.32525	-12.5315	9.07e-14	4.06e-12	21.2874	FBgn0035744	CG8628	CG8628	CG8628	38783	62 // acyl-CoA binding // inferred from sequence or structural similarity /// 4857 // enzyme inhibitor activity // inferred from sequence or structural similarity /// 5386 // carrier activity // inferred from electronic annotation /// 50809 // diazepam binding // inferred from sequence or structural similarity /// 166 // nucleotide binding // inferred from electronic annotation /// 5524 // ATP bi…	6869 // lipid transport // inferred from electronic annotation /// 42049 // cell acyl-CoA homeostasis // inferred from sequence or structural similarity /// 1700 // embryonic development (sensu Insecta) // inferred from mutant phenotype /// 7399 // nervous system development // inferred from mutant phenotype /// 7411 // axon guidance // inferred from mutant phenotype /// 7413 // axonal fasciculat…	---	IPR000582 // Acyl-coA-binding protein, ACBP // 3.1E-32
4612	145811_at	-1.00359	3.46725	-12.5213	9.27e-14	4.14e-12	21.2657	FBgn0031684	CG8680	CG8680	CG8680	33744	3954 // NADH dehydrogenase activity // inferred from sequence or structural similarity /// 8137 // NADH dehydrogenase (ubiquinone) activity // inferred from sequence or structural similarity /// 5515 // protein binding // inferred from physical interaction /// 3954 // NADH dehydrogenase activity // inferred from sequence similarity /// 8137 // NADH dehydrogenase (ubiquinone) activity // inferred …	6120 // mitochondrial electron transport, NADH to ubiquinone // inferred from sequence or structural similarity /// 6120 // mitochondrial electron transport, NADH to ubiquinone // inferred from sequence similarity	5747 // respiratory chain complex I (sensu Eukaryota) // inferred from sequence or structural similarity /// 5747 // respiratory chain complex I (sensu Eukaryota) // inferred from sequence similarity	---
1752	142951_at	-2.23823	2.99316	-12.5101	9.49e-14	4.21e-12	21.2418	FBgn0028534	CG7916	CG7916	CG7916	34800	5515 // protein binding // inferred from physical interaction	---	---	---
3087	144286_at	-1.06671	2.22918	-12.503	9.63e-14	4.24e-12	21.2268	FBgn0028881	CG4218	CG4218	CG4218	34848	---	---	---	---
219	141418_at	-2.05961	3.59773	-12.5012	9.67e-14	4.25e-12	21.2229	FBgn0036024	CG18180	CG18180	CG18180	39125	4263 // chymotrypsin activity // non-traceable author statement /// 4295 // trypsin activity // inferred from electronic annotation /// 4252 // serine-type endopeptidase activity // inferred from electronic annotation	6508 // proteolysis // non-traceable author statement /// 6508 // proteolysis // inferred from electronic annotation	---	IPR001254 // Peptidase S1, chymotrypsin // 4.4E-46
6776	147975_at	-1.29687	1.53886	-12.4608	1.05e-13	4.6e-12	21.1369	FBgn0035217	CG9169	FucTD	FucTD	38164	46920 // alpha(1,3)-fucosyltransferase activity // inferred from sequence or structural similarity /// 46920 // alpha(1,3)-fucosyltransferase activity // non-traceable author statement /// 5515 // protein binding // inferred from physical interaction /// 8417 // fucosyltransferase activity // inferred from electronic annotation /// 16740 // transferase activity // inferred from electronic annotat…	6486 // protein amino acid glycosylation // inferred from electronic annotation	16020 // membrane // inferred from electronic annotation /// 5795 // Golgi stack // inferred from electronic annotation /// 16021 // integral to membrane // inferred from electronic annotation	---
11828	153027_at	-1.30434	1.9481	-12.448	1.08e-13	4.71e-12	21.1097	FBgn0035598	CG4669	CG4669	CG4669	38608	---	---	---	---
11545	152744_at	-0.816795	3.74278	-12.4156	1.16e-13	5.01e-12	21.0405	FBgn0035032	CG4692	CG4692	CG4692	37931	8553 // hydrogen-exporting ATPase activity, phosphorylative mechanism // inferred from sequence or structural similarity /// 5515 // protein binding // inferred from physical interaction /// 15078 // hydrogen ion transporter activity // inferred from electronic annotation /// 46872 // metal ion binding // inferred from electronic annotation /// 8553 // hydrogen-exporting ATPase activity, phosphor…	6118 // electron transport // inferred from electronic annotation /// 6119 // oxidative phosphorylation // inferred from electronic annotation /// 15992 // proton transport // inferred from sequence or structural similarity /// 6754 // ATP biosynthesis // inferred from electronic annotation /// 6810 // transport // inferred from electronic annotation /// 6811 // ion transport // inferred from ele…	276 // proton-transporting ATP synthase complex, coupling factor F(o) (sensu Eukaryota) // inferred from sequence or structural similarity /// 5739 // mitochondrion // inferred from electronic annotation /// 45263 // proton-transporting ATP synthase complex, coupling factor F(o) // inferred from electronic annotation /// 276 // proton-transporting ATP synthase complex, coupling factor F(o) (sensu…	---
7874	149073_at	-1.57104	1.96535	-12.4051	1.18e-13	5.11e-12	21.0182	FBgn0036905	CG14101	CG14101	CG14101	40154	---	---	---	---
1754	142953_at	-0.802719	0.846451	-12.3968	1.21e-13	5.18e-12	21.0003	FBgn0030774	CG9675	CG9675	CG9675	32648	4252 // serine-type endopeptidase activity // non-traceable author statement /// 4263 // chymotrypsin activity // inferred from electronic annotation /// 4295 // trypsin activity // inferred from electronic annotation /// 5515 // protein binding // inferred from physical interaction /// 4252 // serine-type endopeptidase activity // inferred from electronic annotation	6508 // proteolysis // inferred from electronic annotation	---	IPR001254 // Peptidase S1, chymotrypsin // 4.2E-44
6961	148160_at	-0.821449	1.74191	-12.395	1.21e-13	5.19e-12	20.9965	FBgn0035517	CG1265	CG1265	CG1265	38517	---	---	---	IPR006603 // Cystinosin/ERS1p repeat // 1.3E-18
5564	146763_at	-0.610997	0.581296	-12.3922	1.22e-13	5.2e-12	20.9905	FBgn0033216	CG1946	CG1946	CG1946	35720	---	---	---	IPR007130 // Diacylglycerol acyltransferase // 1.0E-126
9558	150757_at	-1.19639	3.04331	-12.3813	1.25e-13	5.31e-12	20.9671	FBgn0039553	CG5017	CG5017	CG5017	43343	---	6334 // nucleosome assembly // inferred from sequence or structural similarity /// 6461 // protein complex assembly // inferred from electronic annotation /// 6334 // nucleosome assembly // inferred from electronic annotation /// 6334 // nucleosome assembly // inferred from sequence similarity	5634 // nucleus // inferred from electronic annotation	IPR002164 // Nucleosome assembly protein (NAP) // 1.6E-46
2472	143671_at	-0.891536	5.90365	-12.3659	1.29e-13	5.47e-12	20.9343	FBgn0011668	CG9074	Mst57Da	Male-specific RNA 57Da	47954	5515 // protein binding // inferred from physical interaction	6952 // defense response // inferred from sequence or structural similarity /// 18991 // oviposition // non-traceable author statement /// 45297 // post-mating behavior // non-traceable author statement /// 7610 // behavior // inferred from electronic annotation /// 6952 // defense response // inferred from sequence similarity	5576 // extracellular region // non-traceable author statement	---
5235	146434_at	-1.11006	2.78577	-12.3428	1.35e-13	5.7e-12	20.8848	FBgn0051802	CG31802	CG31802	CG31802	318949	5509 // calcium ion binding // inferred from sequence or structural similarity /// 5516 // calmodulin binding // inferred from electronic annotation /// 5509 // calcium ion binding // inferred from electronic annotation /// 5509 // calcium ion binding // inferred from sequence similarity	7059 // chromosome segregation // inferred from electronic annotation /// 7067 // mitosis // inferred from electronic annotation /// 19722 // calcium-mediated signaling // inferred from electronic annotation	5813 // centrosome // inferred from sequence or structural similarity /// 5856 // cytoskeleton // inferred from sequence or structural similarity /// 5813 // centrosome // inferred from sequence similarity /// 5856 // cytoskeleton // inferred from sequence similarity	IPR002048 // Calcium-binding EF-hand // 1.7E-5 /// IPR002048 // Calcium-binding EF-hand // 5.2E-6 /// IPR002048 // Calcium-binding EF-hand // 0.01 /// IPR002048 // Calcium-binding EF-hand // 1.8E-5
11323	152522_at	-1.37652	2.57121	-12.3416	1.36e-13	5.7e-12	20.8821	FBgn0032122	CG31883	CG31883	CG31883	326169	8061 // chitin binding // inferred from electronic annotation	6030 // chitin metabolism // inferred from electronic annotation	5576 // extracellular region // inferred from electronic annotation	---
2090	143289_at	-0.971215	4.58053	-12.3372	1.37e-13	5.74e-12	20.8728	FBgn0003034	CG17673	Acp70A	Accessory gland peptide 70A	39494	5179 // hormone activity // non-traceable author statement /// 5515 // protein binding // inferred from physical interaction	6718 // juvenile hormone biosynthesis // non-traceable author statement /// 7557 // regulation of juvenile hormone biosynthesis // traceable author statement /// 7621 // negative regulation of female receptivity // non-traceable author statement /// 7621 // negative regulation of female receptivity // traceable author statement /// 9993 // oogenesis (sensu Insecta) // traceable author statement /…	5576 // extracellular region // non-traceable author statement /// 5576 // extracellular region // traceable author statement	---
7350	148549_at	-1.2644	2.61439	-12.3329	1.38e-13	5.78e-12	20.8635	FBgn0036125	CG6279	CG6279	CG6279	39242	16491 // oxidoreductase activity // inferred from electronic annotation	6118 // electron transport // inferred from electronic annotation /// 6364 // rRNA processing // inferred from electronic annotation	---	IPR000415 // Nitroreductase // 2.4E-15 /// IPR000415 // Nitroreductase // 7.2E-16
2510	143709_at	-0.913775	3.91174	-12.3277	1.4e-13	5.81e-12	20.8523	FBgn0013348	CG2981	TpnC41C	Troponin C at 41C	35473	5509 // calcium ion binding // inferred from sequence or structural similarity /// 5509 // calcium ion binding // non-traceable author statement /// 5516 // calmodulin binding // inferred from electronic annotation /// 5515 // protein binding // inferred from physical interaction /// 5509 // calcium ion binding // inferred from electronic annotation /// 5509 // calcium ion binding // inferred fro…	6936 // muscle contraction // inferred from electronic annotation /// 19722 // calcium-mediated signaling // inferred from electronic annotation	---	IPR002048 // Calcium-binding EF-hand // 0.0095 /// IPR002048 // Calcium-binding EF-hand // 9.5E-7 /// IPR002048 // Calcium-binding EF-hand // 3.8E-6 /// IPR002048 // Calcium-binding EF-hand // 1.2E-7
9204	150403_at	-1.07916	1.76825	-12.3278	1.4e-13	5.81e-12	20.8526	FBgn0039030	CG6660	CG6660	CG6660	42708	8415 // acyltransferase activity // inferred from electronic annotation /// 16740 // transferase activity // inferred from electronic annotation	6629 // lipid metabolism // inferred from electronic annotation /// 6631 // fatty acid metabolism // inferred from electronic annotation	16021 // integral to membrane // inferred from electronic annotation	IPR002076 // GNS1/SUR4 membrane protein // 4.3E-8 /// IPR002076 // GNS1/SUR4 membrane protein // 4.3E-8
4432	145631_at	-0.855732	1.40016	-12.3172	1.43e-13	5.92e-12	20.8297	FBgn0031410	CG17237	CG17237	CG17237	33411	5509 // calcium ion binding // inferred from electronic annotation /// 42623 // ATPase activity, coupled // inferred from sequence or structural similarity /// 42623 // ATPase activity, coupled // inferred from sequence similarity	---	16459 // myosin // inferred from sequence or structural similarity /// 16459 // myosin // inferred from sequence similarity	---
6179	147378_at	-1.04156	4.57778	-12.2916	1.51e-13	6.23e-12	20.7748	FBgn0034245	CG14482	CG14482	CG14482	36991	8121 // ubiquinol-cytochrome-c reductase activity // inferred from sequence or structural similarity /// 5515 // protein binding // inferred from physical interaction /// 8121 // ubiquinol-cytochrome-c reductase activity // inferred from sequence similarity	6122 // mitochondrial electron transport, ubiquinol to cytochrome c // inferred from sequence or structural similarity /// 6122 // mitochondrial electron transport, ubiquinol to cytochrome c // inferred from sequence similarity	5750 // respiratory chain complex III (sensu Eukaryota) // inferred from sequence or structural similarity /// 5750 // respiratory chain complex III (sensu Eukaryota) // inferred from sequence similarity	---
4817	146016_at	-1.1908	3.05477	-12.2893	1.52e-13	6.24e-12	20.7697	FBgn0028987	CG8137	Spn2	Serine protease inhibitor 2	49807	4867 // serine-type endopeptidase inhibitor activity // inferred from sequence or structural similarity /// 4867 // serine-type endopeptidase inhibitor activity // non-traceable author statement /// 42562 // hormone binding // inferred from sequence or structural similarity /// 4867 // serine-type endopeptidase inhibitor activity // inferred from electronic annotation /// 8233 // peptidase activi…	6508 // proteolysis // inferred from electronic annotation /// 45861 // negative regulation of proteolysis // inferred from sequence or structural similarity /// 45861 // negative regulation of proteolysis // inferred from sequence similarity	---	IPR000215 // Serpin // 1.2E-112
2962	144161_r_at	-0.863064	4.95237	-12.2867	1.52e-13	6.26e-12	20.7641	FBgn0011227	CG8764	ox	oxen	45401	8121 // ubiquinol-cytochrome-c reductase activity // inferred from sequence or structural similarity /// 8121 // ubiquinol-cytochrome-c reductase activity // non-traceable author statement /// 8121 // ubiquinol-cytochrome-c reductase activity // inferred from electronic annotation /// 8121 // ubiquinol-cytochrome-c reductase activity // inferred from sequence similarity	6122 // mitochondrial electron transport, ubiquinol to cytochrome c // inferred from sequence or structural similarity /// 7286 // spermatid development // inferred from mutant phenotype /// 6122 // mitochondrial electron transport, ubiquinol to cytochrome c // inferred from electronic annotation /// 6122 // mitochondrial electron transport, ubiquinol to cytochrome c // inferred from sequence sim…	5750 // respiratory chain complex III (sensu Eukaryota) // inferred from sequence or structural similarity /// 5750 // respiratory chain complex III (sensu Eukaryota) // non-traceable author statement /// 5740 // mitochondrial envelope // inferred from electronic annotation /// 5750 // respiratory chain complex III (sensu Eukaryota) // inferred from sequence similarity	IPR008027 // Ubiquinol-cytochrome C reductase, UQCRXQCR9 like // 2.3E-32 /// IPR008027 // Ubiquinol-cytochrome C reductase, UQCRXQCR9 like // 5.4E-33
7366	148565_at	-0.798537	1.11292	-12.2467	1.66e-13	6.74e-12	20.678	FBgn0036146	CG14141	CG14141	CG14141	39264	---	---	16020 // membrane // inferred from electronic annotation	IPR007110 // Immunoglobulin-like // 5.1E-6
11317	152516_at	-1.02944	2.97265	-12.246	1.66e-13	6.74e-12	20.6766	FBgn0037939	CG14718	CG14718	CG14718	41413	3729 // mRNA binding // inferred from sequence or structural similarity /// 166 // nucleotide binding // inferred from electronic annotation /// 3676 // nucleic acid binding // inferred from electronic annotation /// 8270 // zinc ion binding // inferred from electronic annotation /// 3729 // mRNA binding // inferred from sequence similarity	---	---	IPR001876 // Zn-finger, Ran-binding // 1.5E-4 /// IPR001876 // Zn-finger, Ran-binding // 1.1E-5 /// IPR000504 // RNA-binding region RNP-1 (RNA recognition motif) // 5.3E-13
10620	151819_at	-0.777778	2.05454	-12.2111	1.79e-13	7.19e-12	20.6012	FBgn0038878	CG3301	CG3301	CG3301	42528	16616 // oxidoreductase activity, acting on the CH-OH group of donors, NAD or NADP as acceptor // inferred from sequence or structural similarity /// 42802 // identical protein binding // inferred from physical interaction /// 16491 // oxidoreductase activity // inferred from electronic annotation /// 16616 // oxidoreductase activity, acting on the CH-OH group of donors, NAD or NADP as acceptor /…	8152 // metabolism // inferred from electronic annotation	---	IPR002198 // Short-chain dehydrogenase/reductase SDR // 3.2E-36
5603	146802_at	-1.24271	1.89661	-12.1906	1.87e-13	7.49e-12	20.557	FBgn0033283	CG11635	CG11635	CG11635	35808	5515 // protein binding // inferred from physical interaction	---	---	IPR006611 // Cysteine-rich protein of unknown function DM6 // 9.7E-71
6436	147635_at	-1.1164	2.41511	-12.1534	2.03e-13	8.09e-12	20.4764	FBgn0034659	CG4021	CG4021	CG4021	37484	3676 // nucleic acid binding // inferred from electronic annotation /// 3729 // mRNA binding // inferred from electronic annotation	6139 // nucleobase, nucleoside, nucleotide and nucleic acid metabolism // inferred from electronic annotation /// 6915 // apoptosis // inferred from electronic annotation /// 7275 // development // inferred from electronic annotation /// 7276 // gametogenesis // inferred from electronic annotation /// 7283 // spermatogenesis // inferred from electronic annotation /// 8283 // cell proliferation //…	---	---
11863	153062_at	-0.85615	1.72542	-12.1435	2.07e-13	8.22e-12	20.4549	FBgn0031240	CG3345	CG3345	CG3345	33192	3677 // DNA binding // inferred from electronic annotation	---	---	---
6254	147453_at	-0.897926	0.843354	-12.1329	2.12e-13	8.36e-12	20.4319	FBgn0034374	CG15086	CG15086	CG15086	37150	---	---	---	---
10676	151875_at	-0.932858	3.07515	-12.1274	2.14e-13	8.41e-12	20.4199	FBgn0010213	CG8905	Sod2	Superoxide dismutase 2 (Mn)	36878	4784 // superoxide dismutase activity // non-traceable author statement /// 8383 // manganese superoxide dismutase activity // inferred from sequence or structural similarity /// 8383 // manganese superoxide dismutase activity // non-traceable author statement /// 16209 // antioxidant activity // non-traceable author statement /// 46872 // metal ion binding // inferred from electronic annotation …	6801 // superoxide metabolism // non-traceable author statement /// 6952 // defense response // inferred from electronic annotation /// 8340 // determination of adult life span // inferred from mutant phenotype /// 8340 // determination of adult life span // traceable author statement /// 19430 // removal of superoxide radicals // inferred from sequence or structural similarity /// 6801 // supero…	5759 // mitochondrial matrix // inferred from sequence or structural similarity /// 5759 // mitochondrial matrix // non-traceable author statement /// 5739 // mitochondrion // inferred from electronic annotation /// 5759 // mitochondrial matrix // inferred from sequence similarity	IPR001189 // Manganese and iron superoxide dismutase // 1.2E-76 /// IPR001189 // Manganese and iron superoxide dismutase // 1.4E-58
10832	152031_at	-1.613	2.47829	-12.1283	2.14e-13	8.41e-12	20.422	FBgn0011244	CG2830	Hsp60B	Heat shock protein 60 related	48572	5524 // ATP binding // inferred from electronic annotation /// 42623 // ATPase activity, coupled // inferred from sequence or structural similarity /// 51082 // unfolded protein binding // inferred from sequence or structural similarity /// 166 // nucleotide binding // inferred from electronic annotation /// 5515 // protein binding // inferred from electronic annotation /// 51082 // unfolded prot…	6457 // protein folding // inferred from sequence or structural similarity /// 6458 // 'de novo' protein folding // inferred from sequence or structural similarity /// 6626 // protein targeting to mitochondrion // inferred from sequence or structural similarity /// 7286 // spermatid development // inferred from mutant phenotype /// 9408 // response to heat // inferred from sequence or structural …	5739 // mitochondrion // inferred from sequence or structural similarity /// 5759 // mitochondrial matrix // inferred from sequence or structural similarity /// 5739 // mitochondrion // inferred from sequence similarity /// 5759 // mitochondrial matrix // inferred from sequence similarity	IPR002423 // Chaperonin Cpn60/TCP-1 // 1.0E-126
2487	143686_at	-1.26554	1.59221	-12.1154	2.2e-13	8.61e-12	20.3939	FBgn0011743	CG5409	Arp53D	Actin-related protein 53D	36879	5200 // structural constituent of cytoskeleton // inferred from sequence or structural similarity /// 166 // nucleotide binding // inferred from electronic annotation /// 5198 // structural molecule activity // inferred from electronic annotation /// 5515 // protein binding // inferred from electronic annotation /// 5524 // ATP binding // inferred from electronic annotation /// 5200 // structural…	7010 // cytoskeleton organization and biogenesis // inferred from sequence or structural similarity /// 7010 // cytoskeleton organization and biogenesis // inferred from sequence similarity	5884 // actin filament // inferred from sequence or structural similarity /// 15629 // actin cytoskeleton // non-traceable author statement /// 5856 // cytoskeleton // inferred from electronic annotation /// 5884 // actin filament // inferred from sequence similarity	IPR004000 // Actin/actin-like // 1.0E-126
10866	152065_at	-1.67259	3.71769	-12.1092	2.23e-13	8.67e-12	20.3804	FBgn0034144	CG5089	CG5089	CG5089	36859	---	---	---	---
8770	149969_at	-0.838089	1.75346	-12.1013	2.27e-13	8.8e-12	20.3633	FBgn0038355	CG4520	CG4520	CG4520	41902	8308 // voltage-gated ion-selective channel activity // inferred from electronic annotation	6820 // anion transport // inferred from electronic annotation	5741 // mitochondrial outer membrane // inferred from electronic annotation	---
5627	146826_at	-1.06891	0.190411	-12.0827	2.36e-13	9.13e-12	20.3229	FBgn0001285	CG8579	Jon44E	Jonah 44E	35853	4263 // chymotrypsin activity // inferred from sequence or structural similarity /// 4263 // chymotrypsin activity // non-traceable author statement /// 4295 // trypsin activity // inferred from electronic annotation /// 4252 // serine-type endopeptidase activity // inferred from electronic annotation /// 8233 // peptidase activity // inferred from electronic annotation /// 16787 // hydrolase act…	6508 // proteolysis // non-traceable author statement /// 6508 // proteolysis // inferred from electronic annotation	---	IPR001254 // Peptidase S1, chymotrypsin // 2.0E-64
10135	151334_at	-1.43869	3.88224	-12.0672	2.44e-13	9.41e-12	20.2891	---	---	---	---	---	---	---	---	---
8537	149736_at	-1.40662	1.47362	-12.0529	2.52e-13	9.68e-12	20.2578	FBgn0037995	CG3809	CG3809	CG3809	41476	4001 // adenosine kinase activity // inferred from sequence or structural similarity /// 19201 // nucleotide kinase activity // inferred from electronic annotation /// 4001 // adenosine kinase activity // inferred from electronic annotation /// 4001 // adenosine kinase activity // inferred from sequence similarity	6139 // nucleobase, nucleoside, nucleotide and nucleic acid metabolism // inferred from electronic annotation /// 6166 // purine ribonucleoside salvage // inferred from electronic annotation	---	IPR002173 // Carbohydrate kinase, PfkB // 5.4E-36
8994	150193_at	-2.02892	2.98516	-12.043	2.57e-13	9.84e-12	20.2363	FBgn0038702	CG3739	CG3739	CG3739	42320	8236 // serine-type peptidase activity // inferred from sequence or structural similarity /// 3824 // catalytic activity // inferred from electronic annotation /// 8236 // serine-type peptidase activity // inferred from electronic annotation /// 8236 // serine-type peptidase activity // inferred from sequence similarity	6508 // proteolysis // inferred from electronic annotation	---	IPR008758 // Peptidase S28 // 1.0E-126 /// IPR008758 // Peptidase S28 // 1.0E-126
9996	151195_i_at	-0.772037	1.71436	-12.0252	2.67e-13	1.02e-11	20.1975	FBgn0040718	CG15353	CG15353	CG15353	50191	---	---	---	---
1209	142408_at	-0.886598	2.08077	-12.0207	2.7e-13	1.03e-11	20.1877	FBgn0036623	CG4729	CG4729	CG4729	39820	3841 // 1-acylglycerol-3-phosphate O-acyltransferase activity // inferred from sequence or structural similarity /// 5515 // protein binding // inferred from physical interaction /// 8415 // acyltransferase activity // inferred from electronic annotation /// 3841 // 1-acylglycerol-3-phosphate O-acyltransferase activity // inferred from sequence similarity	8152 // metabolism // inferred from electronic annotation	---	IPR002123 // Phospholipid/glycerol acyltransferase // 8.1E-7
11027	152226_at	-2.44175	3.73692	-12.0072	2.78e-13	1.05e-11	20.1583	FBgn0002865	CG11719	Mst98Ca	Male-specific RNA 98Ca	47854	5515 // protein binding // inferred from physical interaction	---	---	---
1112	142311_at	-1.06359	1.63266	-11.9892	2.89e-13	1.09e-11	20.1189	FBgn0017456	CG12799	Ubc84D	Ubiquitin conjugating enzyme 84D	40900	4840 // ubiquitin conjugating enzyme activity // inferred from sequence or structural similarity /// 4840 // ubiquitin conjugating enzyme activity // non-traceable author statement /// 16874 // ligase activity // inferred from electronic annotation /// 4840 // ubiquitin conjugating enzyme activity // inferred from sequence similarity	6512 // ubiquitin cycle // inferred from sequence or structural similarity /// 19538 // protein metabolism // inferred from electronic annotation /// 6512 // ubiquitin cycle // inferred from sequence similarity	---	IPR000608 // Ubiquitin-conjugating enzymes // 5.8E-55
11607	152806_at	-0.869547	1.63552	-11.9888	2.89e-13	1.09e-11	20.118	FBgn0053519	CG33519	CG33519	CG33519	3346201	5524 // ATP binding // inferred from electronic annotation /// 4672 // protein kinase activity // inferred from electronic annotation	6468 // protein amino acid phosphorylation // inferred from electronic annotation	---	IPR003961 // Fibronectin, type III // 2.8E-8 /// IPR003961 // Fibronectin, type III // 9.2E-14 /// IPR000719 // Protein kinase // 1.9E-51 /// IPR000719 // Protein kinase // 9.3E-42 /// IPR007110 // Immunoglobulin-like // 3.2 /// IPR007110 // Immunoglobulin-like // 7.8E-5 /// IPR007110 // Immunoglobulin-like // 2.2E-5 /// IPR007110 // Immunoglobulin-like // 0.1 /// IPR007110 // Immunoglobulin-like…
11577	152776_at	-1.0619	1.95622	-11.9792	2.95e-13	1.11e-11	20.097	FBgn0030247	CG15208	CG15208	CG15208	32022	5515 // protein binding // inferred from physical interaction	---	---	IPR001611 // Leucine-rich repeat // 0.057 /// IPR001611 // Leucine-rich repeat // 0.24
3947	145146_at	-1.03288	2.35994	-11.976	2.97e-13	1.11e-11	20.0899	FBgn0026666	CG8198	l(1)G0136	lethal (1) G0136	32513	5515 // protein binding // inferred from physical interaction	---	---	IPR000361 // Protein of unknown function, HesB/YadR/YfhF // 3.1E-50
6015	147214_at	-1.33385	4.72596	-11.9632	3.06e-13	1.14e-11	20.0618	FBgn0033953	CG12861	CG12861	CG12861	36628	---	---	---	IPR006611 // Cysteine-rich protein of unknown function DM6 // 8.9E-82
6898	148097_at	-0.569195	1.39942	-11.9628	3.06e-13	1.14e-11	20.0609	FBgn0035426	CG12078	CG12078	CG12078	38401	16791 // phosphoric monoester hydrolase activity // inferred from electronic annotation	7275 // development // inferred from electronic annotation /// 7398 // ectoderm development // inferred from electronic annotation /// 7399 // nervous system development // inferred from electronic annotation	---	IPR004274 // NLI interacting factor // 3.1E-104
11523	152722_at	-1.10489	1.42722	-11.9446	3.18e-13	1.17e-11	20.0212	FBgn0037616	CG8136	CG8136	CG8136	41037	5515 // protein binding // inferred from physical interaction	---	---	---
11378	152577_at	-1.10118	2.87729	-11.9407	3.21e-13	1.18e-11	20.0125	FBgn0029161	CG9131	slmo	slowmo	44132	3700 // transcription factor activity // inferred from electronic annotation /// 5515 // protein binding // inferred from physical interaction	6355 // regulation of transcription, DNA-dependent // inferred from electronic annotation /// 7283 // spermatogenesis // inferred from mutant phenotype /// 8345 // larval locomotory behavior // inferred from mutant phenotype /// 30432 // peristalsis // inferred from mutant phenotype /// 30537 // larval behavior // inferred from mutant phenotype	5739 // mitochondrion // inferred from direct assay /// 5739 // mitochondrion // inferred from mutant phenotype /// 5739 // mitochondrion // inferred from electronic annotation	IPR006797 // MSF1 // 2.7E-83
3061	144260_at	-0.8858	2.19617	-11.926	3.31e-13	1.21e-11	19.9803	FBgn0028848	CG7311	CG7311	CG7311	34776	4368 // glycerol-3-phosphate dehydrogenase activity // inferred from sequence or structural similarity /// 16491 // oxidoreductase activity // inferred from electronic annotation /// 4368 // glycerol-3-phosphate dehydrogenase activity // inferred from electronic annotation /// 4368 // glycerol-3-phosphate dehydrogenase activity // inferred from sequence similarity	6072 // glycerol-3-phosphate metabolism // inferred from electronic annotation /// 6118 // electron transport // inferred from electronic annotation /// 6629 // lipid metabolism // inferred from electronic annotation	5739 // mitochondrion // inferred from sequence or structural similarity /// 9331 // glycerol-3-phosphate dehydrogenase complex // inferred from electronic annotation /// 5739 // mitochondrion // inferred from sequence similarity	IPR006076 // FAD dependent oxidoreductase // 1.9E-37 /// IPR006076 // FAD dependent oxidoreductase // 5.2E-11
10176	151375_at	-1.3024	1.75898	-11.892	3.57e-13	1.3e-11	19.9056	FBgn0040904	CG15577	CG15577	CG15577	50378	---	---	---	---
6098	147297_at	-1.28998	1.41964	-11.8637	3.79e-13	1.38e-11	19.8433	FBgn0034105	CG7755	CG7755	CG7755	36816	4449 // isocitrate dehydrogenase (NAD+) activity // inferred from sequence or structural similarity /// 16491 // oxidoreductase activity // inferred from electronic annotation /// 4449 // isocitrate dehydrogenase (NAD+) activity // inferred from sequence similarity	8152 // metabolism // inferred from electronic annotation	5759 // mitochondrial matrix // inferred from sequence or structural similarity /// 5759 // mitochondrial matrix // inferred from sequence similarity	---
11090	152289_at	-0.706695	0.757498	-11.8493	3.91e-13	1.42e-11	19.8116	FBgn0030148	CG3106	CG3106	CG3106	31909	16747 // transferase activity, transferring groups other than amino-acyl groups // inferred from electronic annotation	---	---	IPR002656 // Acyltransferase 3 family // 5.1E-7
4368	145567_at	-0.777453	2.4799	-11.8474	3.93e-13	1.42e-11	19.8075	FBgn0031323	CG5139	CG5139	CG5139	33309	---	---	---	---
6994	148193_at	-0.97289	2.26176	-11.846	3.94e-13	1.42e-11	19.8042	FBgn0052238	CG32238	CG32238	CG32238	326203	4835 // tubulin-tyrosine ligase activity // inferred from sequence or structural similarity /// 5200 // structural constituent of cytoskeleton // inferred from electronic annotation /// 16874 // ligase activity // inferred from electronic annotation /// 4835 // tubulin-tyrosine ligase activity // inferred from sequence similarity	18166 // C-terminal protein-tyrosinylation // inferred from sequence or structural similarity /// 19538 // protein metabolism // inferred from electronic annotation /// 18166 // C-terminal protein-tyrosinylation // inferred from sequence similarity	---	IPR004344 // Tubulin-tyrosine ligase // 1.0E-126
4213	145412_at	-0.877802	2.29472	-11.8387	4.01e-13	1.44e-11	19.7882	FBgn0031087	CG12656	CG12656	CG12656	33011	5515 // protein binding // inferred from physical interaction	---	---	---
12664	153863_at	-1.09925	2.15132	-11.8325	4.06e-13	1.46e-11	19.7747	FBgn0052062	CG32062	CG32062	CG32062	39198	3729 // mRNA binding // inferred from sequence or structural similarity /// 166 // nucleotide binding // inferred from electronic annotation /// 3676 // nucleic acid binding // inferred from electronic annotation /// 3729 // mRNA binding // inferred from sequence similarity	---	---	IPR000504 // RNA-binding region RNP-1 (RNA recognition motif) // 4.8E-20 /// IPR000504 // RNA-binding region RNP-1 (RNA recognition motif) // 4.8E-20
11684	152883_at	-1.16356	2.82905	-11.8227	4.15e-13	1.49e-11	19.7528	FBgn0039511	CG3330	CG3330	CG3330	43296	---	---	---	---
7111	148310_i_at	-1.1485	1.30947	-11.8189	4.18e-13	1.5e-11	19.7445	FBgn0035744	CG8628	CG8628	CG8628	38783	62 // acyl-CoA binding // inferred from sequence or structural similarity /// 4857 // enzyme inhibitor activity // inferred from sequence or structural similarity /// 5386 // carrier activity // inferred from electronic annotation /// 50809 // diazepam binding // inferred from sequence or structural similarity /// 166 // nucleotide binding // inferred from electronic annotation /// 5524 // ATP bi…	6869 // lipid transport // inferred from electronic annotation /// 42049 // cell acyl-CoA homeostasis // inferred from sequence or structural similarity /// 1700 // embryonic development (sensu Insecta) // inferred from mutant phenotype /// 7399 // nervous system development // inferred from mutant phenotype /// 7411 // axon guidance // inferred from mutant phenotype /// 7413 // axonal fasciculat…	---	IPR000582 // Acyl-coA-binding protein, ACBP // 3.1E-32
3020	144219_at	-1.35586	1.94198	-11.815	4.22e-13	1.5e-11	19.736	FBgn0001989	CG13240	l(2)35Di	lethal (2) 35Di	34925	3954 // NADH dehydrogenase activity // inferred from sequence or structural similarity /// 3954 // NADH dehydrogenase activity // inferred from sequence similarity	6120 // mitochondrial electron transport, NADH to ubiquinone // inferred from sequence or structural similarity /// 6120 // mitochondrial electron transport, NADH to ubiquinone // inferred from sequence similarity	5747 // respiratory chain complex I (sensu Eukaryota) // inferred from sequence or structural similarity /// 5747 // respiratory chain complex I (sensu Eukaryota) // inferred from sequence similarity	---
4975	146174_s_at	-1.51065	3.97832	-11.8099	4.27e-13	1.52e-11	19.7246	FBgn0043825 /// FBgn0051872	CG31872 /// CG18284	CG18284 /// CG31872	CG18284 /// CG31872	34458 /// 34460	4806 // triacylglycerol lipase activity // inferred from sequence or structural similarity /// 16298 // lipase activity // inferred from electronic annotation /// 16298 // lipase activity // inferred from sequence or structural similarity /// 16787 // hydrolase activity // inferred from electronic annotation /// 3824 // catalytic activity // inferred from electronic annotation /// 16789 // carbox…	6629 // lipid metabolism // inferred from electronic annotation /// 6629 // lipid metabolism // inferred from sequence or structural similarity /// 16042 // lipid catabolism // inferred from electronic annotation /// 6629 // lipid metabolism // inferred from sequence similarity	---	IPR006693 // Ab-hydrolase associated lipase region // 1.3E-24 /// IPR006693 // Ab-hydrolase associated lipase region // 1.3E-23
1871	143070_at	-1.30383	4.15097	-11.8084	4.28e-13	1.52e-11	19.7213	FBgn0000093	CG3354	Mst77F	Male-specific transcript 77F	40304	---	---	---	---
3978	145177_at	-0.890403	4.27143	-11.8013	4.35e-13	1.54e-11	19.7056	FBgn0030733	CG3560	CG3560	CG3560	32586	8121 // ubiquinol-cytochrome-c reductase activity // inferred from sequence or structural similarity /// 5515 // protein binding // inferred from physical interaction /// 8121 // ubiquinol-cytochrome-c reductase activity // inferred from electronic annotation /// 8121 // ubiquinol-cytochrome-c reductase activity // inferred from sequence similarity	6122 // mitochondrial electron transport, ubiquinol to cytochrome c // inferred from sequence or structural similarity /// 6118 // electron transport // inferred from electronic annotation /// 6122 // mitochondrial electron transport, ubiquinol to cytochrome c // inferred from electronic annotation /// 6122 // mitochondrial electron transport, ubiquinol to cytochrome c // inferred from sequence s…	5750 // respiratory chain complex III (sensu Eukaryota) // inferred from sequence or structural similarity /// 5750 // respiratory chain complex III (sensu Eukaryota) // inferred from sequence similarity	IPR003197 // Cytochrome bd ubiquinol oxidase, 14 kDa subunit // 1.2E-48
5887	147086_at	-0.704867	0.743175	-11.7802	4.55e-13	1.6e-11	19.6591	FBgn0033723	CG13155	CG13155	CG13155	36346	---	---	---	---
3954	145153_at	-0.853578	1.60727	-11.7721	4.63e-13	1.62e-11	19.641	FBgn0053173	CG33173	CG33173	CG33173	318910	166 // nucleotide binding // inferred from electronic annotation /// 5215 // transporter activity // inferred from sequence or structural similarity /// 5524 // ATP binding // inferred from electronic annotation /// 8061 // chitin binding // inferred from electronic annotation /// 42626 // ATPase activity, coupled to transmembrane movement of substances // inferred from sequence or structural sim…	6030 // chitin metabolism // inferred from electronic annotation /// 6810 // transport // inferred from sequence or structural similarity /// 6810 // transport // inferred from sequence similarity	5576 // extracellular region // inferred from electronic annotation /// 43190 // ATP-binding cassette (ABC) transporter complex // inferred from sequence or structural similarity /// 43190 // ATP-binding cassette (ABC) transporter complex // inferred from sequence similarity	IPR002557 // Chitin binding Peritrophin-A // 8.9E-19 /// IPR002557 // Chitin binding Peritrophin-A // 4.2E-15 /// IPR003439 // ABC transporter // 4.5E-25 /// IPR003439 // ABC transporter // 5.0E-21
1220	142419_at	-2.15791	2.49854	-11.7681	4.67e-13	1.63e-11	19.6323	FBgn0030098	CG12057	CG12057	CG12057	31854	---	---	---	---
7741	148940_at	-0.954668	1.74703	-11.7663	4.69e-13	1.64e-11	19.6282	FBgn0036708	CG13725	CG13725	CG13725	39928	---	---	---	---
8989	150188_at	-0.818859	2.41293	-11.7607	4.75e-13	1.65e-11	19.6158	FBgn0038697	CG3581	CG3581	CG3581	42315	3676 // nucleic acid binding // inferred from electronic annotation /// 3677 // DNA binding // inferred from electronic annotation /// 4386 // helicase activity // inferred from electronic annotation /// 5524 // ATP binding // inferred from electronic annotation	---	---	---
7565	148764_at	-0.93665	1.57296	-11.7563	4.8e-13	1.66e-11	19.6061	FBgn0036442	CG13473	CG13473	CG13473	39603	30508 // thiol-disulfide exchange intermediate activity // inferred from sequence or structural similarity /// 5515 // protein binding // inferred from physical interaction /// 3824 // catalytic activity // inferred from electronic annotation /// 4274 // dipeptidyl-peptidase IV activity // inferred from electronic annotation /// 8236 // serine-type peptidase activity // inferred from electronic a…	6118 // electron transport // inferred from electronic annotation /// 6790 // sulfur metabolism // inferred from electronic annotation /// 6508 // proteolysis // inferred from electronic annotation	16020 // membrane // inferred from electronic annotation	IPR006662 // Thioredoxin type domain // 2.3E-27
6561	147760_at	-1.33122	2.56842	-11.7204	5.19e-13	1.79e-11	19.5264	FBgn0034840	CG3124	CG3124	CG3124	37688	5515 // protein binding // inferred from physical interaction	---	---	---
953	142152_at	-1.16617	2.02035	-11.709	5.32e-13	1.83e-11	19.501	FBgn0033818	CG4712	CG4712	CG4712	36469	---	---	---	---
3022	144221_at	-1.14367	2.36533	-11.7023	5.4e-13	1.85e-11	19.4862	FBgn0028513	CG9254	CG9254	CG9254	34773	5436 // sodium:phosphate symporter activity // inferred from sequence or structural similarity /// 5515 // protein binding // inferred from physical interaction /// 5215 // transporter activity // inferred from electronic annotation /// 5436 // sodium:phosphate symporter activity // inferred from sequence similarity	6796 // phosphate metabolism // inferred from electronic annotation /// 6812 // cation transport // inferred from electronic annotation /// 6817 // phosphate transport // inferred from electronic annotation /// 6858 // extracellular transport // inferred from electronic annotation /// 6810 // transport // inferred from electronic annotation	16021 // integral to membrane // inferred from electronic annotation /// 16020 // membrane // inferred from electronic annotation	IPR005828 // General substrate transporter // 6.5E-5
7597	148796_at	-1.15699	1.80076	-11.6935	5.51e-13	1.88e-11	19.4667	FBgn0036488	CG6878	CG6878	CG6878	39656	---	---	---	---
12061	153260_at	-0.870186	2.29434	-11.6796	5.68e-13	1.94e-11	19.4357	FBgn0026061	CG4123	Mipp1	Multiple inositol polyphosphate phosphatase 1	39841	3993 // acid phosphatase activity // inferred from electronic annotation /// 4437 // inositol or phosphatidylinositol phosphatase activity // inferred from sequence or structural similarity /// 4721 // phosphoprotein phosphatase activity // non-traceable author statement /// 4437 // inositol or phosphatidylinositol phosphatase activity // inferred from sequence similarity	---	---	---
6528	147727_at	-1.10345	1.8954	-11.6701	5.8e-13	1.97e-11	19.4147	FBgn0034800	CG3788	CG3788	CG3788	37644	4850 // uridine phosphorylase activity // inferred from sequence or structural similarity /// 3824 // catalytic activity // inferred from electronic annotation /// 4850 // uridine phosphorylase activity // inferred from electronic annotation /// 4850 // uridine phosphorylase activity // inferred from sequence similarity	6206 // pyrimidine base metabolism // inferred from electronic annotation /// 9116 // nucleoside metabolism // inferred from electronic annotation /// 9166 // nucleotide catabolism // inferred from electronic annotation	5737 // cytoplasm // inferred from electronic annotation	---
11809	153008_at	-1.34824	2.84087	-11.6693	5.81e-13	1.97e-11	19.4128	FBgn0038922	CG6439	CG6439	CG6439	42586	4449 // isocitrate dehydrogenase (NAD+) activity // inferred from sequence or structural similarity /// 5515 // protein binding // inferred from physical interaction /// 4449 // isocitrate dehydrogenase (NAD+) activity // inferred from electronic annotation /// 16491 // oxidoreductase activity // inferred from electronic annotation /// 4449 // isocitrate dehydrogenase (NAD+) activity // inferred …	6099 // tricarboxylic acid cycle // inferred from sequence or structural similarity /// 8652 // amino acid biosynthesis // inferred from electronic annotation /// 6099 // tricarboxylic acid cycle // inferred from electronic annotation /// 8152 // metabolism // inferred from electronic annotation /// 6099 // tricarboxylic acid cycle // inferred from sequence similarity	5739 // mitochondrion // inferred from sequence or structural similarity /// 5739 // mitochondrion // inferred from electronic annotation /// 5739 // mitochondrion // inferred from sequence similarity	IPR001804 // Isocitrate/isopropylmalate dehydrogenase // 1.7E-60 /// IPR001804 // Isocitrate/isopropylmalate dehydrogenase // 7.5E-21
3124	144323_at	-0.975484	1.21999	-11.6476	6.09e-13	2.06e-11	19.3645	FBgn0028941	CG16853	CG16853	CG16853	34771	---	---	---	---
6842	148041_at	-0.65813	1.88305	-11.6352	6.26e-13	2.11e-11	19.3368	FBgn0035335	CG1320	mRpL23	mitochondrial ribosomal protein L23	38302	3676 // nucleic acid binding // inferred from electronic annotation /// 3723 // RNA binding // inferred from sequence or structural similarity /// 3729 // mRNA binding // inferred from electronic annotation /// 3735 // structural constituent of ribosome // inferred from sequence or structural similarity /// 166 // nucleotide binding // inferred from electronic annotation /// 3723 // RNA binding /…	6412 // protein biosynthesis // inferred from sequence or structural similarity /// 6412 // protein biosynthesis // inferred from sequence similarity	5762 // mitochondrial large ribosomal subunit // inferred from sequence or structural similarity /// 5739 // mitochondrion // inferred from electronic annotation /// 30529 // ribonucleoprotein complex // inferred from electronic annotation /// 5762 // mitochondrial large ribosomal subunit // inferred from sequence similarity	IPR001014 // Ribosomal L23 protein // 2.2E-8
8370	149569_at	-0.724716	2.63244	-11.6282	6.36e-13	2.14e-11	19.3212	FBgn0037715	CG9399	CG9399	CG9399	41157	5515 // protein binding // inferred from physical interaction	---	---	IPR005336 // Protein of unknown function UPF0041 // 3.0E-42
6319	147518_at	-1.14752	3.86408	-11.6109	6.61e-13	2.21e-11	19.2827	FBgn0034472	CG8517	CG8517	CG8517	37268	30508 // thiol-disulfide exchange intermediate activity // inferred from sequence or structural similarity /// 30508 // thiol-disulfide exchange intermediate activity // inferred from sequence similarity	6118 // electron transport // inferred from electronic annotation /// 6790 // sulfur metabolism // inferred from electronic annotation	5739 // mitochondrion // inferred from sequence or structural similarity /// 5739 // mitochondrion // inferred from sequence similarity	IPR006662 // Thioredoxin type domain // 3.5E-22
5048	146247_at	-1.1514	2.23517	-11.6084	6.64e-13	2.22e-11	19.2771	FBgn0032370	CG12307	CG12307	CG12307	34584	---	---	---	---
8233	149432_at	-1.08328	2.1906	-11.5822	7.04e-13	2.35e-11	19.2185	FBgn0037486	CG14605	CG14605	CG14605	40867	5215 // transporter activity // inferred from electronic annotation	6810 // transport // inferred from electronic annotation	16020 // membrane // inferred from electronic annotation /// 16021 // integral to membrane // inferred from electronic annotation	IPR005828 // General substrate transporter // 1.3E-27 /// IPR005828 // General substrate transporter // 1.3E-27 /// IPR005828 // General substrate transporter // 6.3E-8
1258	142457_at	-0.756161	2.34204	-11.5642	7.33e-13	2.43e-11	19.1782	FBgn0022344	CG10340	CG10340	CG10340	42020	---	6461 // protein complex assembly // inferred from electronic annotation /// 19538 // protein metabolism // inferred from electronic annotation	5739 // mitochondrion // inferred from electronic annotation	IPR010591 // ATP11 // 1.0E-126 /// IPR010591 // ATP11 // 1.0E-126
2139	143338_f_at	-2.15614	5.2732	-11.5609	7.38e-13	2.44e-11	19.1708	FBgn0003356 /// FBgn0003357	CG31362 /// CG31034	Jon99Cii /// Jon99Ciii	Jonah 99Cii /// Jonah 99Ciii	43543 /// 43544	4252 // serine-type endopeptidase activity // inferred from sequence or structural similarity /// 4252 // serine-type endopeptidase activity // non-traceable author statement /// 4263 // chymotrypsin activity // non-traceable author statement /// 4295 // trypsin activity // inferred from electronic annotation /// 8236 // serine-type peptidase activity // non-traceable author statement /// 5515 //…	6508 // proteolysis // non-traceable author statement /// 7586 // digestion // non-traceable author statement /// 6508 // proteolysis // inferred from electronic annotation	---	IPR001254 // Peptidase S1, chymotrypsin // 1.1E-57 /// IPR001254 // Peptidase S1, chymotrypsin // 1.2E-22
7262	148461_at	-1.49689	3.70364	-11.5444	7.66e-13	2.52e-11	19.1337	FBgn0035988	CG3982	CG3982	CG3982	39084	---	---	---	---
11896	153095_at	-0.652614	1.76433	-11.5401	7.73e-13	2.54e-11	19.1242	FBgn0035268	CG8001	CG8001	CG8001	38224	---	---	---	IPR001680 // G-protein beta WD-40 repeat // 1.2E-7 /// IPR001680 // G-protein beta WD-40 repeat // 0.47 /// IPR001680 // G-protein beta WD-40 repeat // 0.2 /// IPR001680 // G-protein beta WD-40 repeat // 1.2 /// IPR001680 // G-protein beta WD-40 repeat // 0.046 /// IPR001680 // G-protein beta WD-40 repeat // 3.9E-4
12849	154048_at	-0.660081	2.19353	-11.5355	7.81e-13	2.56e-11	19.1137	FBgn0026576	CG5991	CG5991	CG5991	42849	4609 // phosphatidylserine decarboxylase activity // inferred from sequence or structural similarity /// 4609 // phosphatidylserine decarboxylase activity // inferred from electronic annotation /// 4609 // phosphatidylserine decarboxylase activity // inferred from sequence similarity	6644 // phospholipid metabolism // inferred from electronic annotation /// 8654 // phospholipid biosynthesis // inferred from electronic annotation	---	IPR003817 // Phosphatidylserine decarboxylase-related // 5.5E-51
1834	143033_at	-0.946818	1.2656	-11.5316	7.88e-13	2.58e-11	19.105	FBgn0001089	CG9092	Gal	galactosidase	33839	4565 // beta-galactosidase activity // inferred from direct assay /// 4565 // beta-galactosidase activity // inferred from sequence or structural similarity /// 4565 // beta-galactosidase activity // inferred from electronic annotation /// 4565 // beta-galactosidase activity // inferred from sequence similarity	5975 // carbohydrate metabolism // inferred from electronic annotation	5764 // lysosome // inferred from sequence or structural similarity /// 9341 // beta-galactosidase complex // inferred from electronic annotation /// 5764 // lysosome // inferred from sequence similarity	IPR001944 // Glycoside hydrolase, family 35 // 5.1E-100 /// IPR001944 // Glycoside hydrolase, family 35 // 2.3E-8
5578	146777_at	-0.907466	1.77554	-11.5195	8.09e-13	2.64e-11	19.078	FBgn0033238	CG11165	CG11165	CG11165	35751	5509 // calcium ion binding // inferred from sequence or structural similarity /// 5516 // calmodulin binding // inferred from electronic annotation /// 5515 // protein binding // inferred from physical interaction /// 5509 // calcium ion binding // inferred from electronic annotation /// 5509 // calcium ion binding // inferred from sequence similarity	6936 // muscle contraction // inferred from electronic annotation /// 19722 // calcium-mediated signaling // inferred from electronic annotation	---	IPR002048 // Calcium-binding EF-hand // 0.0013 /// IPR002048 // Calcium-binding EF-hand // 0.015 /// IPR002048 // Calcium-binding EF-hand // 3.6E-9 /// IPR002048 // Calcium-binding EF-hand // 7.0E-8
10934	152133_at	-0.800295	2.29692	-11.5196	8.09e-13	2.64e-11	19.0781	FBgn0000256	CG3399	capu	cappuccino	33611	3677 // DNA binding // inferred from electronic annotation /// 3779 // actin binding // inferred from sequence or structural similarity /// 5200 // structural constituent of cytoskeleton // inferred from electronic annotation /// 3779 // actin binding // inferred from electronic annotation /// 3779 // actin binding // inferred from sequence similarity	7242 // intracellular signaling cascade // inferred from electronic annotation /// 7304 // eggshell formation (sensu Insecta) // inferred from mutant phenotype /// 7315 // pole plasm assembly // inferred from mutant phenotype /// 7315 // pole plasm assembly // non-traceable author statement /// 7315 // pole plasm assembly // traceable author statement /// 7316 // pole plasm RNA localization // in…	5634 // nucleus // inferred from electronic annotation /// 15629 // actin cytoskeleton // inferred from electronic annotation	IPR003104 // Actin-binding FH2 // 1.0E-126 /// IPR003104 // Actin-binding FH2 // 1.0E-126 /// IPR003104 // Actin-binding FH2 // 1.0E-126 /// IPR003104 // Actin-binding FH2 // 1.0E-126 /// IPR003104 // Actin-binding FH2 // 1.0E-126 /// IPR003104 // Actin-binding FH2 // 1.0E-126
11596	152795_at	-0.883509	4.45182	-11.4434	9.59e-13	3.1e-11	18.9066	FBgn0038225	CG8489	CG8489	CG8489	41748	---	---	---	---
7094	148293_at	-0.998709	1.27718	-11.4393	9.68e-13	3.12e-11	18.8974	FBgn0035724	CG10064	CG10064	CG10064	38761	---	---	---	IPR001680 // G-protein beta WD-40 repeat // 0.0024 /// IPR001680 // G-protein beta WD-40 repeat // 1.1 /// IPR001680 // G-protein beta WD-40 repeat // 6.5E-5 /// IPR001680 // G-protein beta WD-40 repeat // 1.1 /// IPR001680 // G-protein beta WD-40 repeat // 3.8E-6 /// IPR001680 // G-protein beta WD-40 repeat // 3.3E-7 /// IPR001680 // G-protein beta WD-40 repeat // 0.51 /// IPR001680 // G-protein…
10890	152089_at	-1.06314	2.23234	-11.4246	1e-12	3.21e-11	18.8642	FBgn0036159	CG7557	CG7557	CG7557	39278	---	---	---	---
4044	145243_at	-0.899848	1.64767	-11.4201	1.01e-12	3.24e-11	18.8541	FBgn0030837	CG8661	CG8661	CG8661	32720	---	---	---	---
7235	148434_at	-0.562289	0.968196	-11.3992	1.06e-12	3.38e-11	18.8069	FBgn0035943	CG5653	CG5653	CG5653	39024	16491 // oxidoreductase activity // inferred from electronic annotation	6118 // electron transport // inferred from electronic annotation	---	IPR002937 // Amine oxidase // 2.5E-98
5278	146477_at	-0.981031	2.73021	-11.3936	1.07e-12	3.41e-11	18.7943	FBgn0032755	CG17344	CG17344	CG17344	35185	---	---	---	---
10601	151800_at	-1.13004	2.9106	-11.3888	1.08e-12	3.44e-11	18.7833	FBgn0034229	CG4847	CG4847	CG4847	36973	4216 // cathepsin K activity // inferred from sequence or structural similarity /// 8234 // cysteine-type peptidase activity // inferred from sequence or structural similarity /// 4197 // cysteine-type endopeptidase activity // inferred from electronic annotation /// 8233 // peptidase activity // inferred from electronic annotation /// 8234 // cysteine-type peptidase activity // inferred from ele…	6508 // proteolysis // inferred from electronic annotation /// 6508 // proteolysis // inferred from sequence or structural similarity /// 6508 // proteolysis // inferred from sequence similarity	---	IPR000668 // Peptidase C1A, papain // 2.7E-96 /// IPR000668 // Peptidase C1A, papain // 2.7E-96
10729	151928_at	-0.932381	3.57881	-11.3873	1.09e-12	3.45e-11	18.7799	FBgn0050412	CG30412	CG30412	CG30412	37691	---	---	---	---
13773	154972_at	-0.641812	0.97847	-11.3853	1.09e-12	3.45e-11	18.7754	FBgn0037664	CG8420	CG8420	CG8420	41097	---	---	---	---
7638	148837_at	-0.715231	1.00961	-11.3781	1.11e-12	3.49e-11	18.7591	FBgn0036551	CG17029	CG17029	CG17029	39740	8934 // inositol-1(or 4)-monophosphatase activity // inferred from sequence or structural similarity /// 8934 // inositol-1(or 4)-monophosphatase activity // non-traceable author statement /// 4437 // inositol or phosphatidylinositol phosphatase activity // inferred from electronic annotation /// 8934 // inositol-1(or 4)-monophosphatase activity // inferred from sequence similarity	6644 // phospholipid metabolism // inferred from electronic annotation /// 7242 // intracellular signaling cascade // inferred from electronic annotation /// 16311 // dephosphorylation // non-traceable author statement	---	IPR000760 // Inositol monophosphatase // 7.1E-104
8044	149243_at	-0.57097	1.08213	-11.3753	1.12e-12	3.5e-11	18.7529	FBgn0037176	CG14456	CG14456	CG14456	40481	---	---	---	---
4709	145908_at	-1.04923	5.11664	-11.3598	1.16e-12	3.61e-11	18.7178	FBgn0031830	CG11015	CG11015	CG11015	33918	4129 // cytochrome-c oxidase activity // inferred from sequence or structural similarity /// 4129 // cytochrome-c oxidase activity // inferred from electronic annotation /// 4129 // cytochrome-c oxidase activity // inferred from sequence similarity	6123 // mitochondrial electron transport, cytochrome c to oxygen // inferred from sequence or structural similarity /// 6118 // electron transport // inferred from electronic annotation /// 6123 // mitochondrial electron transport, cytochrome c to oxygen // inferred from sequence similarity	5739 // mitochondrion // inferred from sequence or structural similarity /// 5751 // respiratory chain complex IV (sensu Eukaryota) // inferred from sequence or structural similarity /// 5740 // mitochondrial envelope // inferred from electronic annotation /// 5739 // mitochondrion // inferred from sequence similarity /// 5751 // respiratory chain complex IV (sensu Eukaryota) // inferred from seq…	IPR002124 // Cytochrome c oxidase, subunit Vb // 3.4E-22
9222	150421_at	-0.989585	3.06914	-11.3454	1.19e-12	3.72e-11	18.6852	FBgn0039049	CG6726	CG6726	CG6726	42728	4046 // aminoacylase activity // non-traceable author statement /// 8237 // metallopeptidase activity // inferred from electronic annotation /// 4046 // aminoacylase activity // inferred from electronic annotation /// 16787 // hydrolase activity // inferred from electronic annotation /// 46983 // protein dimerization activity // inferred from electronic annotation	6508 // proteolysis // inferred from electronic annotation /// 6520 // amino acid metabolism // inferred from electronic annotation	5737 // cytoplasm // inferred from electronic annotation	IPR002933 // Peptidase M20 // 7.9E-91 /// IPR002933 // Peptidase M20 // 7.9E-91
13463	154662_at	-0.711177	2.95263	-11.3434	1.2e-12	3.73e-11	18.6806	FBgn0032222	CG5037	CG5037	CG5037	34394	8415 // acyltransferase activity // inferred from electronic annotation /// 8495 // protoheme IX farnesyltransferase activity // inferred from sequence or structural similarity /// 4659 // prenyltransferase activity // inferred from electronic annotation /// 8495 // protoheme IX farnesyltransferase activity // inferred from electronic annotation /// 8495 // protoheme IX farnesyltransferase activi…	6732 // coenzyme metabolism // inferred from electronic annotation /// 48034 // heme o biosynthesis // inferred from sequence or structural similarity /// 6783 // heme biosynthesis // inferred from electronic annotation /// 48034 // heme o biosynthesis // inferred from sequence similarity	5740 // mitochondrial envelope // inferred from sequence or structural similarity /// 16021 // integral to membrane // inferred from electronic annotation /// 5740 // mitochondrial envelope // inferred from sequence similarity	IPR000537 // UbiA prenyltransferase // 2.4E-61
10339	151538_s_at	-2.06156	3.89074	-11.337	1.22e-12	3.77e-11	18.6661	FBgn0016724	CG11064	RfaBp	Retinoid- and fatty-acid binding protein	43827	5198 // structural molecule activity // inferred from sequence or structural similarity /// 5319 // lipid transporter activity // inferred from electronic annotation /// 5501 // retinoid binding // non-traceable author statement /// 5504 // fatty acid binding // non-traceable author statement /// 8017 // microtubule binding // inferred from direct assay /// 19841 // retinol binding // inferred fr…	6810 // transport // traceable author statement /// 6869 // lipid transport // inferred from electronic annotation /// 7224 // smoothened signaling pathway // inferred from mutant phenotype /// 16055 // Wnt receptor signaling pathway // inferred from mutant phenotype /// 6810 // transport // inferred from electronic annotation /// 16055 // Wnt receptor signaling pathway // inferred from electroni…	5576 // extracellular region // non-traceable author statement	IPR009454 // Protein of unknown function DUF1081 // 3.0E-55 /// IPR001846 // von Willebrand factor, type D // 2.9E-29 /// IPR001747 // Lipid transport protein, N-terminal // 7.1E-119
12980	154179_at	-0.673864	1.5126	-11.3322	1.23e-12	3.8e-11	18.6553	FBgn0037746	CG8478	CG8478	CG8478	41194	3676 // nucleic acid binding // inferred from electronic annotation /// 8270 // zinc ion binding // inferred from electronic annotation /// 46872 // metal ion binding // inferred from electronic annotation	---	5634 // nucleus // inferred from electronic annotation	IPR007087 // Zn-finger, C2H2 type // 2.3E-5 /// IPR007087 // Zn-finger, C2H2 type // 2.3E-5
4639	145838_at	-2.31212	3.30551	-11.3266	1.25e-12	3.84e-11	18.6424	FBgn0031728	CG7235	CG7235	CG7235	33796	5524 // ATP binding // inferred from electronic annotation /// 42623 // ATPase activity, coupled // non-traceable author statement /// 51082 // unfolded protein binding // inferred from electronic annotation /// 5515 // protein binding // inferred from physical interaction /// 166 // nucleotide binding // inferred from electronic annotation /// 4672 // protein kinase activity // inferred from ele…	6457 // protein folding // inferred from sequence or structural similarity /// 6458 // 'de novo' protein folding // inferred from sequence or structural similarity /// 6626 // protein targeting to mitochondrion // inferred from sequence or structural similarity /// 6950 // response to stress // non-traceable author statement /// 42026 // protein refolding // non-traceable author statement /// 910…	5739 // mitochondrion // inferred from sequence or structural similarity /// 5759 // mitochondrial matrix // inferred from sequence or structural similarity /// 5759 // mitochondrial matrix // non-traceable author statement /// 5739 // mitochondrion // inferred from electronic annotation /// 5739 // mitochondrion // inferred from sequence similarity /// 5759 // mitochondrial matrix // inferred fr…	IPR002423 // Chaperonin Cpn60/TCP-1 // 1.0E-126
10341	151540_at	-1.01237	2.06502	-11.2999	1.32e-12	4.06e-11	18.5818	FBgn0040696 /// FBgn0003710	CG18675 /// CG1232	CG18675 /// tipE	CG18675 /// temperature-induced paralytic E	38504 /// 50169	5248 // voltage-gated sodium channel activity // inferred from sequence or structural similarity /// 5248 // voltage-gated sodium channel activity // traceable author statement /// 5515 // protein binding // inferred from physical interaction /// 5248 // voltage-gated sodium channel activity // inferred from sequence similarity	6814 // sodium ion transport // non-traceable author statement	5886 // plasma membrane // inferred from direct assay /// 5886 // plasma membrane // inferred from sequence or structural similarity /// 5886 // plasma membrane // traceable author statement /// 5887 // integral to plasma membrane // non-traceable author statement /// 16020 // membrane // inferred from electronic annotation /// 16021 // integral to membrane // inferred from electronic annotation …	---
1300	142499_at	-0.898807	2.47116	-11.281	1.38e-12	4.23e-11	18.539	FBgn0019830	CG3057	colt	congested-like trachea	33470	5215 // transporter activity // inferred from sequence or structural similarity /// 5215 // transporter activity // non-traceable author statement /// 5476 // carnitine:acyl carnitine antiporter activity // inferred from sequence or structural similarity /// 5488 // binding // inferred from electronic annotation /// 5215 // transporter activity // inferred from electronic annotation /// 5215 // t…	6629 // lipid metabolism // inferred from electronic annotation /// 6839 // mitochondrial transport // inferred from sequence or structural similarity /// 6844 // acyl carnitine transport // inferred from sequence or structural similarity /// 6869 // lipid transport // inferred from electronic annotation /// 15879 // carnitine transport // inferred from sequence or structural similarity /// 6810 …	5740 // mitochondrial envelope // inferred from sequence or structural similarity /// 5740 // mitochondrial envelope // non-traceable author statement /// 5743 // mitochondrial inner membrane // inferred from sequence or structural similarity /// 5739 // mitochondrion // inferred from electronic annotation /// 5743 // mitochondrial inner membrane // inferred from electronic annotation /// 16020 /…	IPR001993 // Mitochondrial substrate carrier // 7.3E-35 /// IPR001993 // Mitochondrial substrate carrier // 5.7E-33 /// IPR001993 // Mitochondrial substrate carrier // 2.3E-27
11196	152395_at	-1.28803	2.54947	-11.2767	1.39e-12	4.26e-11	18.5292	FBgn0037329	CG12162	CG12162	CG12162	40655	8168 // methyltransferase activity // inferred from electronic annotation /// 16740 // transferase activity // inferred from electronic annotation /// 5515 // protein binding // inferred from physical interaction	8152 // metabolism // inferred from electronic annotation	---	IPR007474 // Protein of unknown function DUF525 // 2.5E-73 /// IPR007474 // Protein of unknown function DUF525 // 2.5E-73
4888	146087_at	-1.10377	2.66991	-11.2492	1.48e-12	4.52e-11	18.4665	FBgn0032117	CG4435	FucTB	FucTB	34260	8417 // fucosyltransferase activity // non-traceable author statement /// 46920 // alpha(1,3)-fucosyltransferase activity // inferred from sequence or structural similarity /// 46920 // alpha(1,3)-fucosyltransferase activity // non-traceable author statement /// 5515 // protein binding // inferred from physical interaction /// 8417 // fucosyltransferase activity // inferred from electronic annota…	6486 // protein amino acid glycosylation // inferred from electronic annotation	5886 // plasma membrane // non-traceable author statement /// 5795 // Golgi stack // inferred from electronic annotation /// 16020 // membrane // inferred from electronic annotation /// 16021 // integral to membrane // inferred from electronic annotation	IPR001503 // Glycosyl transferase, family 10 // 2.6E-19
7029	148228_at	-1.20998	1.37282	-11.2403	1.51e-12	4.61e-11	18.4462	FBgn0035619	CG10592	CG10592	CG10592	38632	4035 // alkaline phosphatase activity // inferred from sequence or structural similarity /// 19204 // nucleotide phosphatase activity // inferred from electronic annotation /// 4035 // alkaline phosphatase activity // inferred from sequence similarity	1501 // skeletal development // inferred from electronic annotation /// 7498 // mesoderm development // inferred from electronic annotation /// 8152 // metabolism // inferred from electronic annotation	---	IPR001952 // Alkaline phosphatase // 9.2E-84
4393	145592_at	-1.78439	3.31987	-11.2246	1.57e-12	4.75e-11	18.4104	FBgn0021906 /// FBgn0068089	CG7361	RFeSP /// DyakRFeSP	Rieske iron-sulfur protein /// RFeSP	44390	8121 // ubiquinol-cytochrome-c reductase activity // inferred from sequence or structural similarity /// 8121 // ubiquinol-cytochrome-c reductase activity // inferred from electronic annotation /// 8121 // ubiquinol-cytochrome-c reductase activity // inferred from sequence similarity	6122 // mitochondrial electron transport, ubiquinol to cytochrome c // inferred from sequence or structural similarity /// 6118 // electron transport // inferred from electronic annotation /// 6122 // mitochondrial electron transport, ubiquinol to cytochrome c // inferred from sequence similarity	5750 // respiratory chain complex III (sensu Eukaryota) // inferred from sequence or structural similarity /// 5750 // respiratory chain complex III (sensu Eukaryota) // inferred from sequence similarity	IPR004192 // Ubiquinol cytochrome reductase transmembrane region // 1.1E-42 /// IPR005806 // Rieske [2Fe-2S] domain // 2.3E-18
6854	148053_at	-1.00014	1.48054	-11.2242	1.57e-12	4.75e-11	18.4095	FBgn0062517	CG16984	CG16984	CG16984	38322	5515 // protein binding // inferred from physical interaction	---	---	---
11447	152646_at	-1.26801	1.53986	-11.2156	1.6e-12	4.83e-11	18.3897	FBgn0034816	CG3085	CG3085	CG3085	37663	5200 // structural constituent of cytoskeleton // inferred from electronic annotation /// 8017 // microtubule binding // inferred from electronic annotation /// 5515 // protein binding // inferred from physical interaction	226 // microtubule cytoskeleton organization and biogenesis // inferred from electronic annotation /// 7275 // development // inferred from electronic annotation /// 7276 // gametogenesis // inferred from electronic annotation /// 7283 // spermatogenesis // inferred from electronic annotation	5874 // microtubule // inferred from electronic annotation	IPR000435 // Tektin // 1.0E-126
2233	143432_at	-1.26107	3.18132	-11.1745	1.75e-12	5.28e-11	18.2959	FBgn0004171	CG18396	Mst98Cb	Male-specific RNA 98Cb	43367	---	---	---	---
8919	150118_at	-0.864559	1.94088	-11.1599	1.81e-12	5.43e-11	18.2625	FBgn0038575	CG7208	CG7208	CG7208	42172	3824 // catalytic activity // inferred from electronic annotation	6629 // lipid metabolism // inferred from electronic annotation	---	---
2802	144001_at	-0.792062	0.683854	-11.1413	1.89e-12	5.65e-11	18.2198	FBgn0023541	CG3540	Cyp4d14	Cyp4d14	45706	4497 // monooxygenase activity // inferred from electronic annotation /// 16491 // oxidoreductase activity // inferred from electronic annotation	6118 // electron transport // inferred from electronic annotation	5792 // microsome // non-traceable author statement /// 16020 // membrane // non-traceable author statement	IPR001128 // Cytochrome P450 // 7.8E-117
1225	142424_at	-0.79405	1.6085	-11.1385	1.9e-12	5.68e-11	18.2134	FBgn0032483	CG15482	CG15482	CG15482	34717	---	---	---	---
6969	148168_at	-0.824451	1.15834	-11.1375	1.91e-12	5.68e-11	18.2112	FBgn0052250	CG32250	CG32250	CG32250	38532	5215 // transporter activity // inferred from sequence or structural similarity /// 5386 // carrier activity // inferred from sequence or structural similarity /// 5488 // binding // inferred from electronic annotation /// 5215 // transporter activity // inferred from electronic annotation /// 5215 // transporter activity // inferred from sequence similarity /// 5386 // carrier activity // inferr…	6810 // transport // inferred from sequence or structural similarity /// 6810 // transport // inferred from electronic annotation /// 6810 // transport // inferred from sequence similarity	5740 // mitochondrial envelope // inferred from sequence or structural similarity /// 5743 // mitochondrial inner membrane // inferred from electronic annotation /// 5779 // integral to peroxisomal membrane // inferred from sequence or structural similarity /// 16020 // membrane // inferred from electronic annotation /// 16021 // integral to membrane // inferred from electronic annotation /// 574…	IPR001993 // Mitochondrial substrate carrier // 9.1E-19 /// IPR001993 // Mitochondrial substrate carrier // 2.2E-24 /// IPR001993 // Mitochondrial substrate carrier // 1.7E-14
3416	144615_at	-0.642693	0.872246	-11.1247	1.97e-12	5.82e-11	18.1817	FBgn0029502	CG14437	COQ7	COQ7	44007	---	6094 // gluconeogenesis // inferred from electronic annotation /// 6743 // ubiquinone metabolism // inferred from sequence or structural similarity /// 6744 // ubiquinone biosynthesis // inferred from electronic annotation /// 19538 // protein metabolism // inferred from electronic annotation /// 6743 // ubiquinone metabolism // inferred from sequence similarity	5743 // mitochondrial inner membrane // inferred from sequence or structural similarity /// 5743 // mitochondrial inner membrane // inferred from sequence similarity	IPR004916 // Ubiquinone biosyntheis protein COQ7 // 5.0E-54 /// IPR004916 // Ubiquinone biosyntheis protein COQ7 // 2.9E-44
8782	149981_at	-1.15865	2.09322	-11.1181	1.99e-12	5.9e-11	18.1665	FBgn0038373	CG4546	CG4546	CG4546	41922	4054 // arginine kinase activity // inferred from sequence or structural similarity /// 19202 // amino acid kinase activity // inferred from electronic annotation /// 5515 // protein binding // inferred from physical interaction /// 16301 // kinase activity // inferred from electronic annotation /// 16740 // transferase activity // inferred from electronic annotation /// 16772 // transferase acti…	---	---	IPR000749 // ATP:guanido phosphotransferase // 1.2E-14 /// IPR000749 // ATP:guanido phosphotransferase // 1.1E-94
5604	146803_at	-1.44967	3.43769	-11.1083	2.04e-12	6.01e-11	18.1442	FBgn0050365	CG30365	CG30365	CG30365	246568	---	---	---	---
11204	152403_at	-1.25072	0.540327	-11.1033	2.06e-12	6.07e-11	18.1325	FBgn0039647	CG14509	CG14509	CG14509	43453	---	---	---	---
8071	149270_at	-0.716433	1.19205	-11.0994	2.08e-12	6.11e-11	18.1235	FBgn0037226	CG14644	CG14644	CG14644	40536	5200 // structural constituent of cytoskeleton // inferred from electronic annotation	7010 // cytoskeleton organization and biogenesis // inferred from electronic annotation	16020 // membrane // inferred from electronic annotation	IPR001107 // Band 7 protein // 6.7E-70
5539	146738_at	-0.888705	1.62484	-11.0835	2.16e-12	6.31e-11	18.0871	FBgn0033168	CG11145	CG11145	CG11145	35663	---	---	---	---
8473	149672_at	-0.782036	2.15494	-11.0819	2.17e-12	6.32e-11	18.0835	FBgn0037872	CG31299	nocturnin	nocturnin	41339	3676 // nucleic acid binding // inferred from electronic annotation	---	---	IPR005135 // Endonuclease/exonuclease/phosphatase // 1.0E-34 /// IPR005135 // Endonuclease/exonuclease/phosphatase // 1.0E-34 /// IPR005135 // Endonuclease/exonuclease/phosphatase // 1.0E-39
10293	151492_at	-1.03691	1.70779	-11.0669	2.24e-12	6.53e-11	18.0488	FBgn0027540	CG33719	Pif1A	PFTAIRE-interacting factor 1A	3772312	3677 // DNA binding // inferred from electronic annotation /// 5515 // protein binding // inferred from physical interaction	6355 // regulation of transcription, DNA-dependent // inferred from electronic annotation	5634 // nucleus // inferred from electronic annotation	---
5741	146940_at	-1.33644	3.24489	-11.0438	2.36e-12	6.87e-11	17.9957	FBgn0033512	CG12902	CG12902	CG12902	36092	---	---	---	---
3689	144888_at	-0.815216	1.22839	-11.0358	2.41e-12	6.98e-11	17.9771	FBgn0030319	CG2533	CG2533	CG2533	32110	---	---	---	---
2896	144095_at	-0.587258	2.47554	-11.0248	2.47e-12	7.14e-11	17.9517	FBgn0067861	CG9580	Sdic:CG9580	Sdic:CG9580	43984	---	---	---	IPR001680 // G-protein beta WD-40 repeat // 0.047 /// IPR001680 // G-protein beta WD-40 repeat // 0.081 /// IPR001680 // G-protein beta WD-40 repeat // 4.5E-5
11400	152599_at	-0.927745	1.33885	-11.0225	2.48e-12	7.16e-11	17.9466	FBgn0013988	CG18255	Strn-Mlck	Stretchin-Mlck	36753	4674 // protein serine/threonine kinase activity // non-traceable author statement /// 4685 // calcium- and calmodulin-dependent protein kinase activity // inferred from direct assay /// 4687 // myosin light chain kinase activity // inferred from direct assay /// 4687 // myosin light chain kinase activity // inferred from sequence or structural similarity /// 5021 // vascular endothelial growth f…	910 // cytokinesis // inferred from electronic annotation /// 6468 // protein amino acid phosphorylation // inferred from sequence or structural similarity /// 6468 // protein amino acid phosphorylation // non-traceable author statement /// 7059 // chromosome segregation // inferred from electronic annotation /// 7067 // mitosis // inferred from electronic annotation /// 7498 // mesoderm developm…	16020 // membrane // inferred from electronic annotation	IPR007110 // Immunoglobulin-like // 9.5E-8 /// IPR003961 // Fibronectin, type III // 5.9E-8 /// IPR003961 // Fibronectin, type III // 2.2E-12 /// IPR000719 // Protein kinase // 1.8E-80 /// IPR007110 // Immunoglobulin-like // 1.1E-6 /// IPR007110 // Immunoglobulin-like // 0.04 /// IPR007110 // Immunoglobulin-like // 0.02 /// IPR007110 // Immunoglobulin-like // 1.3 /// IPR007110 // Immunoglobulin-l…
2505	143704_s_at	-1.28088	3.79325	-11.0157	2.52e-12	7.23e-11	17.9309	FBgn0013301 /// FBgn0013300	CG4479 /// CG4478	Mst35Bb /// Mst35Ba	Male-specific-transcript-35Bb /// Male-specific-transcript-35Ba	34866 /// 34867	3677 // DNA binding // inferred from sequence or structural similarity /// 3677 // DNA binding // inferred from sequence similarity	---	---	IPR010477 // Protein of unknown function DUF1074 // 8.3E-87 /// IPR010477 // Protein of unknown function DUF1074 // 2.8E-87 /// IPR010477 // Protein of unknown function DUF1074 // 7.2E-87
8441	149640_at	-1.17583	1.84679	-11.0162	2.52e-12	7.23e-11	17.9321	FBgn0037828	CG14690	tomboy20	tomboy20	41285	5386 // carrier activity // inferred from electronic annotation /// 15450 // protein translocase activity // inferred from sequence or structural similarity /// 15450 // protein translocase activity // inferred from sequence similarity	6626 // protein targeting to mitochondrion // inferred from sequence or structural similarity /// 6605 // protein targeting // inferred from electronic annotation /// 6886 // intracellular protein transport // inferred from electronic annotation /// 6626 // protein targeting to mitochondrion // inferred from sequence similarity	5742 // mitochondrial outer membrane translocase complex // inferred from sequence or structural similarity /// 5742 // mitochondrial outer membrane translocase complex // inferred from electronic annotation /// 5742 // mitochondrial outer membrane translocase complex // inferred from sequence similarity	IPR002056 // Protein import receptor MAS20 // 9.1E-7
1122	142321_at	-1.58961	3.62849	-11.0093	2.56e-12	7.32e-11	17.916	FBgn0030277	CG1394	CG1394	CG1394	32059	5524 // ATP binding // inferred from electronic annotation	---	---	---
9571	150770_at	-0.790076	1.97808	-10.9988	2.62e-12	7.47e-11	17.8917	FBgn0039576	CG17856	CG17856	CG17856	43369	8121 // ubiquinol-cytochrome-c reductase activity // inferred from sequence or structural similarity /// 8121 // ubiquinol-cytochrome-c reductase activity // inferred from electronic annotation /// 8121 // ubiquinol-cytochrome-c reductase activity // inferred from sequence similarity	6122 // mitochondrial electron transport, ubiquinol to cytochrome c // inferred from sequence or structural similarity /// 6118 // electron transport // inferred from electronic annotation /// 6122 // mitochondrial electron transport, ubiquinol to cytochrome c // inferred from electronic annotation /// 6122 // mitochondrial electron transport, ubiquinol to cytochrome c // inferred from sequence s…	5750 // respiratory chain complex III (sensu Eukaryota) // inferred from sequence or structural similarity /// 5750 // respiratory chain complex III (sensu Eukaryota) // inferred from sequence similarity	IPR003197 // Cytochrome bd ubiquinol oxidase, 14 kDa subunit // 8.9E-49
5876	147075_at	-1.18002	2.59278	-10.9831	2.71e-12	7.71e-11	17.8554	FBgn0061197	CG13164	SIP2	Syntaxin Interacting Protein 2	36332	---	---	---	IPR001646 // Pentapeptide repeat // 6.4E-9
2235	143434_at	-0.931916	5.22265	-10.9805	2.73e-12	7.73e-11	17.8494	FBgn0004173	CG17934	Mst84Db	Male-specific RNA 84Db	40888	5506 // iron ion binding // inferred from electronic annotation	6118 // electron transport // inferred from electronic annotation /// 7275 // development // inferred from electronic annotation /// 7283 // spermatogenesis // inferred from electronic annotation /// 30154 // cell differentiation // inferred from electronic annotation	---	IPR005634 // Male specific sperm protein // 7.3E-17
2671	143870_at	-0.734734	4.66432	-10.9807	2.73e-12	7.73e-11	17.85	FBgn0016119	CG4412	ATPsyn-Cf6	ATPase coupling factor 6	42759	8553 // hydrogen-exporting ATPase activity, phosphorylative mechanism // inferred from sequence or structural similarity /// 8553 // hydrogen-exporting ATPase activity, phosphorylative mechanism // non-traceable author statement /// 46933 // hydrogen-transporting ATP synthase activity, rotational mechanism // inferred from electronic annotation /// 46961 // hydrogen-transporting ATPase activity, …	6118 // electron transport // inferred from electronic annotation /// 6119 // oxidative phosphorylation // inferred from electronic annotation /// 15986 // ATP synthesis coupled proton transport // inferred from electronic annotation /// 15992 // proton transport // inferred from sequence or structural similarity /// 15992 // proton transport // non-traceable author statement /// 6810 // transpor…	5756 // proton-transporting ATP synthase, central stalk (sensu Eukaryota) // inferred from sequence or structural similarity /// 5739 // mitochondrion // inferred from electronic annotation /// 16469 // proton-transporting two-sector ATPase complex // inferred from electronic annotation /// 45263 // proton-transporting ATP synthase complex, coupling factor F(o) // inferred from electronic annotat…	IPR008387 // Mitochondrial ATP synthase coupling factor 6 // 3.3E-65
157	141356_at	-0.644281	3.02179	-10.9791	2.74e-12	7.74e-11	17.8461	FBgn0036762	CG7430	CG7430	CG7430	39988	4148 // dihydrolipoyl dehydrogenase activity // inferred from sequence or structural similarity /// 15036 // disulfide oxidoreductase activity // inferred from electronic annotation /// 46872 // metal ion binding // inferred from electronic annotation /// 4148 // dihydrolipoyl dehydrogenase activity // inferred from electronic annotation /// 16491 // oxidoreductase activity // inferred from elect…	6096 // glycolysis // inferred from electronic annotation /// 6099 // tricarboxylic acid cycle // inferred from sequence or structural similarity /// 6118 // electron transport // inferred from electronic annotation /// 6546 // glycine catabolism // inferred from sequence or structural similarity /// 6748 // lipoamide metabolism // inferred from sequence or structural similarity /// 6099 // trica…	5947 // alpha-ketoglutarate dehydrogenase complex (sensu Eukaryota) // inferred from sequence or structural similarity /// 5960 // glycine cleavage complex // inferred from sequence or structural similarity /// 5737 // cytoplasm // inferred from electronic annotation /// 5947 // alpha-ketoglutarate dehydrogenase complex (sensu Eukaryota) // inferred from sequence similarity /// 5960 // glycine cl…	IPR004099 // Pyridine nucleotide-disulphide oxidoreductase dimerisation domain // 1.2E-64 /// IPR001327 // FAD-dependent pyridine nucleotide-disulphide oxidoreductase // 5.1E-103
4976	146175_at	-1.3652	3.82536	-10.9761	2.76e-12	7.76e-11	17.8393	FBgn0032275	CG17097	CG17097	CG17097	34461	4806 // triacylglycerol lipase activity // inferred from sequence or structural similarity /// 16298 // lipase activity // inferred from sequence or structural similarity /// 3824 // catalytic activity // inferred from electronic annotation /// 16787 // hydrolase activity // inferred from electronic annotation /// 16789 // carboxylic ester hydrolase activity // inferred from electronic annotation…	6629 // lipid metabolism // inferred from electronic annotation /// 6629 // lipid metabolism // inferred from sequence or structural similarity /// 16042 // lipid catabolism // inferred from electronic annotation /// 6629 // lipid metabolism // inferred from sequence similarity	---	IPR006693 // Ab-hydrolase associated lipase region // 7.9E-24 /// IPR006693 // Ab-hydrolase associated lipase region // 7.9E-24
11339	152538_at	-0.96387	4.6288	-10.9369	3.02e-12	8.44e-11	17.7486	FBgn0017539	CG17246	Scs-fp	Succinyl coenzyme A synthetase flavoprotein subunit	37228	4776 // succinate-CoA ligase (GDP-forming) activity // non-traceable author statement /// 8177 // succinate dehydrogenase (ubiquinone) activity // inferred from sequence or structural similarity /// 8177 // succinate dehydrogenase (ubiquinone) activity // non-traceable author statement /// 15036 // disulfide oxidoreductase activity // inferred from electronic annotation /// 8177 // succinate dehy…	6099 // tricarboxylic acid cycle // inferred from sequence or structural similarity /// 6099 // tricarboxylic acid cycle // non-traceable author statement /// 6118 // electron transport // inferred from electronic annotation /// 6119 // oxidative phosphorylation // inferred from electronic annotation /// 6099 // tricarboxylic acid cycle // inferred from electronic annotation /// 6810 // transport…	5749 // respiratory chain complex II (sensu Eukaryota) // inferred from sequence or structural similarity /// 5749 // respiratory chain complex II (sensu Eukaryota) // non-traceable author statement /// 5739 // mitochondrion // inferred from electronic annotation /// 5749 // respiratory chain complex II (sensu Eukaryota) // inferred from sequence similarity	IPR004112 // Fumarate reductase/succinate dehydrogenase flavoprotein, C-terminal // 5.9E-93 /// IPR003953 // Fumarate reductase/succinate dehydrogenase flavoprotein, N-terminal // 1.0E-126
2141	143340_f_at	-2.18935	5.27556	-10.9324	3.05e-12	8.49e-11	17.738	FBgn0003356 /// FBgn0003357	CG31362 /// CG31034	Jon99Cii /// Jon99Ciii	Jonah 99Cii /// Jonah 99Ciii	43543 /// 43544	4252 // serine-type endopeptidase activity // inferred from sequence or structural similarity /// 4252 // serine-type endopeptidase activity // non-traceable author statement /// 4263 // chymotrypsin activity // non-traceable author statement /// 4295 // trypsin activity // inferred from electronic annotation /// 8236 // serine-type peptidase activity // non-traceable author statement /// 4252 //…	6508 // proteolysis // non-traceable author statement /// 7586 // digestion // non-traceable author statement /// 6508 // proteolysis // inferred from electronic annotation	---	IPR001254 // Peptidase S1, chymotrypsin // 1.1E-57
13198	154397_at	-0.618048	1.85458	-10.9297	3.07e-12	8.53e-11	17.7317	FBgn0033918	CG8531	CG8531	CG8531	36584	31072 // heat shock protein binding // inferred from electronic annotation /// 51082 // unfolded protein binding // inferred from electronic annotation	6457 // protein folding // inferred from electronic annotation /// 19538 // protein metabolism // inferred from electronic annotation /// 6605 // protein targeting // inferred from electronic annotation /// 6810 // transport // inferred from electronic annotation /// 15031 // protein transport // inferred from electronic annotation	16020 // membrane // inferred from electronic annotation /// 16021 // integral to membrane // inferred from electronic annotation	IPR001623 // Heat shock protein DnaJ, N-terminal // 6.2E-29
1088	142287_at	-1.75482	2.78553	-10.9275	3.08e-12	8.54e-11	17.7266	FBgn0051025	CG31025	CG31025	CG31025	43581	---	---	---	---
4403	145602_at	-0.953088	2.22077	-10.9225	3.12e-12	8.62e-11	17.7151	FBgn0031367	CG15623	CG15623	CG15623	33360	---	---	---	---
4388	145587_at	-1.37449	2.0348	-10.9216	3.12e-12	8.62e-11	17.7131	FBgn0031347	CG10869	CG10869	CG10869	33337	5515 // protein binding // inferred from physical interaction	---	---	---
5816	147015_at	-0.698107	1.58957	-10.9201	3.14e-12	8.63e-11	17.7095	FBgn0043471	CG12388	Try	Try	36215	4252 // serine-type endopeptidase activity // non-traceable author statement /// 4263 // chymotrypsin activity // inferred from electronic annotation /// 4295 // trypsin activity // inferred from electronic annotation	6508 // proteolysis // inferred from electronic annotation	---	IPR001254 // Peptidase S1, chymotrypsin // 4.3E-67
210	141409_at	-1.09526	1.36587	-10.9165	3.16e-12	8.68e-11	17.7012	FBgn0039154	CG6164	CG6164	CG6164	42864	5515 // protein binding // inferred from physical interaction	---	---	IPR003172 // E1 protein and Def2/Der2 allergen // 2.3E-29
11286	152485_at	-0.857208	2.48948	-10.9089	3.22e-12	8.8e-11	17.6835	---	CG33934 /// CG33933	---	---	---	17153 // sodium:dicarboxylate symporter activity // inferred from sequence or structural similarity /// 15137 // citrate transporter activity // inferred from sequence or structural similarity /// 15141 // succinate transporter activity // inferred from sequence or structural similarity /// 50833 // pyruvate transporter activity // inferred from sequence or structural similarity /// 5215 // trans…	6810 // transport // inferred from sequence or structural similarity /// 6814 // sodium ion transport // inferred from electronic annotation /// 6848 // pyruvate transport // inferred from sequence or structural similarity /// 8340 // determination of adult life span // inferred from sequence or structural similarity /// 15744 // succinate transport // inferred from sequence or structural similar…	16021 // integral to membrane // inferred from sequence or structural similarity /// 5887 // integral to plasma membrane // inferred from sequence or structural similarity /// 16020 // membrane // inferred from electronic annotation /// 16021 // integral to membrane // inferred from electronic annotation	---
6245	147444_at	-0.775446	1.23996	-10.882	3.42e-12	9.33e-11	17.6211	FBgn0034356	CG10924	CG10924	CG10924	37130	4613 // phosphoenolpyruvate carboxykinase (GTP) activity // inferred from sequence or structural similarity /// 5215 // transporter activity // inferred from electronic annotation /// 5525 // GTP binding // inferred from electronic annotation /// 5515 // protein binding // inferred from physical interaction /// 4611 // phosphoenolpyruvate carboxykinase activity // inferred from electronic annotat…	6094 // gluconeogenesis // inferred from sequence or structural similarity /// 6810 // transport // inferred from electronic annotation /// 6094 // gluconeogenesis // inferred from electronic annotation /// 6094 // gluconeogenesis // inferred from sequence similarity	5739 // mitochondrion // inferred from sequence or structural similarity /// 5739 // mitochondrion // inferred from sequence similarity	IPR008209 // Phosphoenolpyruvate carboxykinase (GTP) // 1.0E-126
11879	153078_at	-1.04001	2.78236	-10.88	3.44e-12	9.35e-11	17.6163	FBgn0011270	CG17645	Pglym87	Pglym87	46246	4619 // phosphoglycerate mutase activity // inferred from sequence or structural similarity /// 3824 // catalytic activity // inferred from electronic annotation /// 16868 // intramolecular transferase activity, phosphotransferases // inferred from electronic annotation /// 4619 // phosphoglycerate mutase activity // inferred from sequence similarity	6096 // glycolysis // inferred from electronic annotation /// 8152 // metabolism // inferred from electronic annotation	---	IPR001345 // Phosphoglycerate/bisphosphoglycerate mutase // 1.4E-113 /// IPR001345 // Phosphoglycerate/bisphosphoglycerate mutase // 1.4E-113
10885	152084_at	-1.04703	2.96822	-10.877	3.46e-12	9.38e-11	17.6094	FBgn0028560	CG1380	sut4	sugar transporter 4	36055	5351 // sugar porter activity // inferred from sequence or structural similarity /// 5355 // glucose transporter activity // inferred from sequence or structural similarity /// 5215 // transporter activity // inferred from electronic annotation /// 5351 // sugar porter activity // inferred from electronic annotation /// 5351 // sugar porter activity // inferred from sequence similarity /// 5355 /…	5975 // carbohydrate metabolism // inferred from electronic annotation /// 8643 // carbohydrate transport // inferred from electronic annotation /// 6810 // transport // inferred from electronic annotation	16020 // membrane // inferred from electronic annotation /// 16021 // integral to membrane // inferred from electronic annotation	IPR005828 // General substrate transporter // 2.9E-96
7402	148601_at	-1.02091	1.37813	-10.8651	3.56e-12	9.61e-11	17.5816	FBgn0036204	CG11611	Tim13	Tim13	39327	15450 // protein translocase activity // inferred from sequence or structural similarity /// 15450 // protein translocase activity // inferred from sequence similarity	6626 // protein targeting to mitochondrion // inferred from sequence or structural similarity /// 15031 // protein transport // inferred from sequence or structural similarity /// 45039 // protein import into mitochondrial inner membrane // inferred from electronic annotation /// 6626 // protein targeting to mitochondrion // inferred from sequence similarity /// 15031 // protein transport // infe…	5744 // mitochondrial inner membrane presequence translocase complex // inferred from sequence or structural similarity /// 42721 // mitochondrial inner membrane protein insertion complex // inferred from electronic annotation /// 5744 // mitochondrial inner membrane presequence translocase complex // inferred from sequence similarity	IPR004217 // Zn-finger, Tim10/DDP type // 3.6E-36
5964	147163_at	-0.92326	2.91141	-10.8531	3.66e-12	9.86e-11	17.5537	FBgn0033862	CG6209	CG6209	CG6209	36517	---	---	---	---
2459	143658_at	-0.729745	3.27884	-10.8382	3.79e-12	1.02e-10	17.5189	FBgn0011361	CG9160	mtacp1	mitochondrial acyl carrier protein 1	38154	36 // acyl carrier activity // inferred from electronic annotation /// 3954 // NADH dehydrogenase activity // inferred from sequence or structural similarity /// 8137 // NADH dehydrogenase (ubiquinone) activity // inferred from sequence or structural similarity /// 8137 // NADH dehydrogenase (ubiquinone) activity // non-traceable author statement /// 48037 // cofactor binding // inferred from ele…	6120 // mitochondrial electron transport, NADH to ubiquinone // inferred from sequence or structural similarity /// 6633 // fatty acid biosynthesis // inferred from electronic annotation /// 8610 // lipid biosynthesis // inferred from electronic annotation /// 6120 // mitochondrial electron transport, NADH to ubiquinone // inferred from sequence similarity	5739 // mitochondrion // non-traceable author statement /// 5747 // respiratory chain complex I (sensu Eukaryota) // inferred from sequence or structural similarity /// 5739 // mitochondrion // inferred from electronic annotation /// 5747 // respiratory chain complex I (sensu Eukaryota) // inferred from sequence similarity	IPR006163 // Phosphopantetheine-binding domain // 4.3E-14 /// IPR006163 // Phosphopantetheine-binding domain // 1.2E-14
10985	152184_at	-0.903909	0.742811	-10.8374	3.79e-12	1.02e-10	17.5171	FBgn0038109	CG11656	CG11656	CG11656	41600	5515 // protein binding // inferred from physical interaction	---	---	---
2474	143673_at	-1.04468	4.04552	-10.82	3.95e-12	1.05e-10	17.4766	FBgn0011670	CG4986	Mst57Dc	Male-specific RNA 57Dc	43121	---	18991 // oviposition // non-traceable author statement /// 45297 // post-mating behavior // non-traceable author statement /// 7610 // behavior // inferred from electronic annotation	5576 // extracellular region // non-traceable author statement	---
2730	143929_at	-0.928657	1.1341	-10.8198	3.95e-12	1.05e-10	17.4759	FBgn0020508	CG9540	Ag5r2	Antigen 5-related 2	44079	---	6952 // defense response // inferred from electronic annotation	5576 // extracellular region // inferred from sequence or structural similarity /// 5576 // extracellular region // inferred from electronic annotation /// 5576 // extracellular region // inferred from sequence similarity	IPR001283 // Allergen V5/Tpx-1 related // 2.2E-45
9922	151121_at	-0.753272	2.21282	-10.82	3.95e-12	1.05e-10	17.4765	FBgn0040636	CG13255	CG13255	CG13255	50109	---	---	---	---
10837	152036_at	-0.648629	2.91711	-10.8201	3.95e-12	1.05e-10	17.4768	FBgn0027785	CG6008	NP15.6	NP15.6	42282	---	---	---	---
3078	144277_at	-0.698693	1.35671	-10.8074	4.07e-12	1.08e-10	17.447	FBgn0028868	CG4701	CG4701	CG4701	34858	5524 // ATP binding // inferred from sequence or structural similarity /// 16887 // ATPase activity // inferred from sequence or structural similarity /// 166 // nucleotide binding // inferred from electronic annotation /// 5524 // ATP binding // inferred from electronic annotation /// 17111 // nucleoside-triphosphatase activity // inferred from electronic annotation /// 5524 // ATP binding // in…	6886 // intracellular protein transport // inferred from electronic annotation	5741 // mitochondrial outer membrane // inferred from sequence or structural similarity /// 5741 // mitochondrial outer membrane // inferred from sequence similarity	IPR003959 // AAA ATPase, central region // 1.1E-70
2597	143796_at	-0.652458	0.975602	-10.7827	4.3e-12	1.14e-10	17.3893	FBgn0015316	CG9564	Try29F	Trypsin 29F	34226	4263 // chymotrypsin activity // inferred from electronic annotation /// 4295 // trypsin activity // inferred from sequence or structural similarity /// 4295 // trypsin activity // non-traceable author statement /// 8233 // peptidase activity // inferred from electronic annotation /// 8236 // serine-type peptidase activity // inferred from electronic annotation /// 4252 // serine-type endopeptida…	6508 // proteolysis // non-traceable author statement /// 6508 // proteolysis // inferred from electronic annotation	---	IPR001254 // Peptidase S1, chymotrypsin // 7.3E-89
9268	150467_at	-2.17794	3.04978	-10.7822	4.31e-12	1.14e-10	17.3883	FBgn0039112	CG10219	CG10219	CG10219	42808	104 // succinate dehydrogenase activity // inferred from sequence or structural similarity /// 8177 // succinate dehydrogenase (ubiquinone) activity // inferred from sequence or structural similarity /// 20037 // heme binding // inferred from electronic annotation /// 5515 // protein binding // inferred from physical interaction /// 5506 // iron ion binding // inferred from electronic annotation …	6099 // tricarboxylic acid cycle // inferred from sequence or structural similarity /// 6118 // electron transport // inferred from electronic annotation /// 6099 // tricarboxylic acid cycle // inferred from electronic annotation /// 6810 // transport // inferred from electronic annotation /// 6099 // tricarboxylic acid cycle // inferred from sequence similarity	5743 // mitochondrial inner membrane // inferred from sequence or structural similarity /// 5749 // respiratory chain complex II (sensu Eukaryota) // inferred from sequence or structural similarity /// 16021 // integral to membrane // inferred from electronic annotation /// 5739 // mitochondrion // inferred from electronic annotation /// 5740 // mitochondrial envelope // inferred from electronic …	IPR007992 // CybS // 8.9E-79
8040	149239_at	-0.670083	1.54065	-10.7778	4.35e-12	1.14e-10	17.378	FBgn0037172	CG6914	CG6914	CG6914	40477	8137 // NADH dehydrogenase (ubiquinone) activity // inferred from sequence or structural similarity /// 8137 // NADH dehydrogenase (ubiquinone) activity // inferred from electronic annotation /// 8137 // NADH dehydrogenase (ubiquinone) activity // inferred from sequence similarity	42773 // ATP synthesis coupled electron transport // inferred from electronic annotation	5747 // respiratory chain complex I (sensu Eukaryota) // inferred from sequence or structural similarity /// 5743 // mitochondrial inner membrane // inferred from electronic annotation /// 5747 // respiratory chain complex I (sensu Eukaryota) // inferred from sequence similarity	IPR009947 // NADH:ubiquinone oxidoreductase subunit B14.5a // 1.5E-24
8416	149615_at	-0.807761	1.58516	-10.7782	4.35e-12	1.14e-10	17.3788	FBgn0037788	CG3940	CG3940	CG3940	41238	4089 // carbonate dehydratase activity // inferred from sequence or structural similarity /// 8270 // zinc ion binding // inferred from electronic annotation /// 4089 // carbonate dehydratase activity // inferred from electronic annotation /// 4089 // carbonate dehydratase activity // inferred from sequence similarity	6730 // one-carbon compound metabolism // inferred from electronic annotation	---	IPR001148 // Carbonic anhydrase, eukaryotic // 7.7E-20 /// IPR001148 // Carbonic anhydrase, eukaryotic // 2.0E-14
6016	147215_at	-1.0884	4.06427	-10.7744	4.39e-12	1.15e-10	17.3699	FBgn0033954	CG12860	CG12860	CG12860	36629	---	---	---	IPR006611 // Cysteine-rich protein of unknown function DM6 // 2.4E-74 /// IPR006611 // Cysteine-rich protein of unknown function DM6 // 2.4E-74
12383	153582_at	-0.689688	1.96147	-10.7723	4.41e-12	1.15e-10	17.3651	FBgn0032084	CG13101	CG13101	CG13101	34221	---	7275 // development // inferred from electronic annotation /// 7498 // mesoderm development // inferred from electronic annotation /// 7517 // muscle development // inferred from electronic annotation	---	---
11105	152304_at	-0.828484	4.83867	-10.7641	4.49e-12	1.17e-10	17.3458	FBgn0037643	CG11963	CG11963	CG11963	41067	4775 // succinate-CoA ligase (ADP-forming) activity // inferred from sequence or structural similarity /// 3824 // catalytic activity // inferred from electronic annotation /// 4775 // succinate-CoA ligase (ADP-forming) activity // inferred from sequence similarity	6099 // tricarboxylic acid cycle // inferred from sequence or structural similarity /// 8152 // metabolism // inferred from electronic annotation /// 6099 // tricarboxylic acid cycle // inferred from sequence similarity	9361 // succinate-CoA ligase complex (ADP-forming) // inferred from sequence or structural similarity /// 9361 // succinate-CoA ligase complex (ADP-forming) // inferred from sequence similarity	IPR003135 // ATP-dependent carboxylate-amine ligase-like, ATP-grasp // 1.2E-19 /// IPR005811 // ATP-citrate lyase/succinyl-CoA ligase // 7.9E-77
2194	143393_at	-1.51597	4.46291	-10.757	4.57e-12	1.19e-10	17.3292	FBgn0003889	CG9359	Tub85D	Tubulin at 85D	41124	5200 // structural constituent of cytoskeleton // inferred from sequence or structural similarity /// 5525 // GTP binding // non-traceable author statement /// 15631 // tubulin binding // inferred from electronic annotation /// 166 // nucleotide binding // inferred from electronic annotation /// 3924 // GTPase activity // inferred from electronic annotation /// 5198 // structural molecule activit…	6886 // intracellular protein transport // inferred from electronic annotation /// 6928 // cell motility // inferred from electronic annotation /// 7017 // microtubule-based process // inferred from sequence or structural similarity /// 7059 // chromosome segregation // inferred from electronic annotation /// 7067 // mitosis // inferred from electronic annotation /// 7018 // microtubule-based mov…	5874 // microtubule // inferred from sequence or structural similarity /// 5874 // microtubule // non-traceable author statement /// 45298 // tubulin // non-traceable author statement /// 5874 // microtubule // inferred from electronic annotation /// 43234 // protein complex // inferred from electronic annotation /// 5737 // cytoplasm // inferred from electronic annotation /// 5874 // microtubule…	IPR003008 // Tubulin/FtsZ, GTPase // 8.4E-111 /// IPR008280 // Tubulin/FtsZ, C-terminal // 1.4E-80
510	141709_i_at	-1.18274	3.768	-10.756	4.58e-12	1.19e-10	17.327	FBgn0003885	CG2512	Tub84D	Tubulin at 84D	40904	3924 // GTPase activity // inferred from electronic annotation /// 5200 // structural constituent of cytoskeleton // inferred from sequence or structural similarity /// 5525 // GTP binding // non-traceable author statement /// 15631 // tubulin binding // inferred from electronic annotation /// 5515 // protein binding // inferred from physical interaction /// 166 // nucleotide binding // inferred …	910 // cytokinesis // inferred from mutant phenotype /// 6886 // intracellular protein transport // inferred from electronic annotation /// 6928 // cell motility // inferred from electronic annotation /// 7017 // microtubule-based process // inferred from sequence or structural similarity /// 7018 // microtubule-based movement // inferred from electronic annotation /// 7059 // chromosome segregat…	5874 // microtubule // inferred from sequence or structural similarity /// 5874 // microtubule // non-traceable author statement /// 45298 // tubulin // non-traceable author statement /// 5874 // microtubule // inferred from electronic annotation /// 43234 // protein complex // inferred from electronic annotation /// 5874 // microtubule // inferred from sequence similarity	IPR003008 // Tubulin/FtsZ, GTPase // 1.9E-109 /// IPR008280 // Tubulin/FtsZ, C-terminal // 4.1E-79
11859	153058_at	-0.631305	1.12834	-10.7532	4.61e-12	1.2e-10	17.3204	FBgn0030814	CG4955	CG4955	CG4955	32692	5515 // protein binding // inferred from physical interaction	---	---	---
11723	152922_at	-0.496135	0.337081	-10.7351	4.81e-12	1.24e-10	17.2779	FBgn0003244	CG6775	rg	rugose	44531	16491 // oxidoreductase activity // inferred from electronic annotation /// 51018 // protein kinase A binding // inferred from direct assay /// 51018 // protein kinase A binding // non-traceable author statement /// 5515 // protein binding // inferred from physical interaction /// 5488 // binding // inferred from electronic annotation	6118 // electron transport // inferred from electronic annotation /// 6605 // protein targeting // inferred from electronic annotation /// 8104 // protein localization // inferred from direct assay /// 8104 // protein localization // non-traceable author statement /// 42674 // cone cell differentiation (sensu Endopterygota) // inferred from mutant phenotype /// 42462 // eye photoreceptor cell dev…	5737 // cytoplasm // inferred from direct assay /// 16021 // integral to membrane // inferred from direct assay /// 16020 // membrane // inferred from electronic annotation /// 16021 // integral to membrane // inferred from electronic annotation	IPR010508 // Protein of unknown function DUF1088 // 1.0E-126 /// IPR000409 // Beige/BEACH domain // 1.0E-126 /// IPR001680 // G-protein beta WD-40 repeat // 1.4E-8 /// IPR001680 // G-protein beta WD-40 repeat // 1.5E-4 /// IPR001680 // G-protein beta WD-40 repeat // 0.088 /// IPR001680 // G-protein beta WD-40 repeat // 0.051 /// IPR010508 // Protein of unknown function DUF1088 // 1.0E-126 /// IPR…
8682	149881_at	-0.729668	2.31521	-10.7282	4.88e-12	1.26e-10	17.2617	FBgn0038210	CG3199	CG3199	CG3199	41725	---	---	---	---
7756	148955_at	-0.585585	2.3534	-10.7235	4.94e-12	1.27e-10	17.2508	FBgn0036726	CG7603	CG7603	CG7603	39948	5515 // protein binding // inferred from physical interaction	---	---	---
5130	146329_at	-0.755146	1.63014	-10.7222	4.95e-12	1.28e-10	17.2478	FBgn0032503	CG16825	CG16825	CG16825	34739	---	---	---	---
11122	152321_at	-0.60758	0.984818	-10.7137	5.05e-12	1.3e-10	17.2277	FBgn0038752	CG4462	CG4462	CG4462	42376	8513 // organic cation porter activity // inferred from sequence or structural similarity /// 8513 // organic cation porter activity // inferred from sequence similarity	6812 // cation transport // inferred from electronic annotation /// 6858 // extracellular transport // inferred from electronic annotation	---	---
9941	151140_at	-0.881053	2.22446	-10.6978	5.24e-12	1.34e-10	17.1903	FBgn0050222	CG30222	CG30222	CG30222	50129	---	---	---	---
5859	147058_at	-0.724286	1.35821	-10.6879	5.36e-12	1.37e-10	17.1672	FBgn0033687	CG8407	CG8407	CG8407	36303	3777 // microtubule motor activity // inferred from electronic annotation /// 5200 // structural constituent of cytoskeleton // inferred from electronic annotation /// 42623 // ATPase activity, coupled // inferred from sequence or structural similarity /// 42623 // ATPase activity, coupled // inferred from sequence similarity	7018 // microtubule-based movement // inferred from sequence or structural similarity /// 7018 // microtubule-based movement // inferred from sequence similarity	30286 // dynein complex // inferred from sequence or structural similarity /// 30286 // dynein complex // inferred from sequence similarity	IPR001372 // Dynein light chain, type 1 // 1.2E-14
4968	146167_at	-0.683056	1.42026	-10.6859	5.39e-12	1.38e-10	17.1623	FBgn0032266	CG18302	CG18302	CG18302	34452	16298 // lipase activity // inferred from electronic annotation /// 16787 // hydrolase activity // inferred from electronic annotation	6629 // lipid metabolism // inferred from electronic annotation	---	IPR006693 // Ab-hydrolase associated lipase region // 4.0E-22
5658	146857_at	-1.2526	2.44235	-10.6813	5.45e-12	1.39e-10	17.1515	FBgn0033364	CG13747	CG13747	CG13747	35907	---	---	---	---
6314	147513_at	-0.804155	1.95289	-10.6581	5.75e-12	1.46e-10	17.097	FBgn0034467	CG15128	CG15128	CG15128	37263	5488 // binding // inferred from electronic annotation	---	---	IPR010782 // Protein of unknown function DUF1377 // 1.0E-126
8531	149730_at	-0.862574	1.38154	-10.6511	5.84e-12	1.48e-10	17.0805	FBgn0037987	CG14739	CG14739	CG14739	41467	4840 // ubiquitin conjugating enzyme activity // inferred from sequence or structural similarity /// 16874 // ligase activity // inferred from electronic annotation /// 5515 // protein binding // inferred from physical interaction /// 4842 // ubiquitin-protein ligase activity // inferred from electronic annotation /// 4840 // ubiquitin conjugating enzyme activity // inferred from sequence similar…	6464 // protein modification // inferred from electronic annotation /// 6512 // ubiquitin cycle // inferred from electronic annotation /// 19538 // protein metabolism // inferred from electronic annotation	---	IPR000608 // Ubiquitin-conjugating enzymes // 1.0E-47
5456	146655_at	-0.67361	0.856373	-10.6466	5.9e-12	1.49e-10	17.07	FBgn0033042	CG14468	Tsp42A	Tetraspanin 42A	35515	---	---	16021 // integral to membrane // inferred from sequence or structural similarity /// 16021 // integral to membrane // inferred from sequence similarity	---
5011	146210_at	-0.738505	2.08489	-10.64	6e-12	1.51e-10	17.0544	FBgn0032318	CG14072	CG14072	CG14072	34513	---	---	---	---
13529	154728_at	-0.57777	2.34792	-10.6376	6.03e-12	1.52e-10	17.0487	FBgn0032236	CG5108	mRpS7	mitochondrial ribosomal protein S7	34412	3676 // nucleic acid binding // inferred from electronic annotation /// 3735 // structural constituent of ribosome // inferred from sequence or structural similarity /// 5515 // protein binding // inferred from physical interaction /// 3735 // structural constituent of ribosome // inferred from electronic annotation /// 3735 // structural constituent of ribosome // inferred from sequence similari…	6412 // protein biosynthesis // inferred from sequence or structural similarity /// 6412 // protein biosynthesis // inferred from electronic annotation /// 6412 // protein biosynthesis // inferred from sequence similarity	5763 // mitochondrial small ribosomal subunit // inferred from sequence or structural similarity /// 5622 // intracellular // inferred from electronic annotation /// 5840 // ribosome // inferred from electronic annotation /// 5763 // mitochondrial small ribosomal subunit // inferred from sequence similarity	IPR000235 // Ribosomal protein S7 // 2.4E-29
1009	142208_at	-1.0649	3.87328	-10.6173	6.32e-12	1.59e-10	17.0008	FBgn0039190	CG5762	CG5762	CG5762	42907	5515 // protein binding // inferred from physical interaction	---	---	---
5544	146743_at	-1.09083	2.39902	-10.606	6.49e-12	1.63e-10	16.9741	FBgn0033174	CG11125	CG11125	CG11125	35669	5515 // protein binding // inferred from physical interaction	---	---	---
2075	143274_at	-0.919473	4.70288	-10.5948	6.66e-12	1.66e-10	16.9476	FBgn0002862	CG17956	Mst87F	Male-specific RNA 87F	41693	5506 // iron ion binding // inferred from electronic annotation	6118 // electron transport // inferred from electronic annotation	---	---
3657	144856_at	-0.878449	3.12312	-10.5948	6.66e-12	1.66e-10	16.9477	FBgn0030280	CG11106	CG11106	CG11106	32062	---	---	---	---
6590	147789_at	-0.977342	4.78838	-10.5764	6.96e-12	1.73e-10	16.9041	FBgn0034877	CG17280	CG17280	CG17280	37728	4129 // cytochrome-c oxidase activity // inferred from sequence or structural similarity /// 4129 // cytochrome-c oxidase activity // inferred from electronic annotation /// 4129 // cytochrome-c oxidase activity // inferred from sequence similarity	6123 // mitochondrial electron transport, cytochrome c to oxygen // inferred from sequence or structural similarity /// 6118 // electron transport // inferred from electronic annotation /// 6123 // mitochondrial electron transport, cytochrome c to oxygen // inferred from sequence similarity	5751 // respiratory chain complex IV (sensu Eukaryota) // inferred from sequence or structural similarity /// 5740 // mitochondrial envelope // inferred from electronic annotation /// 5751 // respiratory chain complex IV (sensu Eukaryota) // inferred from sequence similarity	IPR001349 // Cytochrome c oxidase, subunit VIa // 3.6E-31
9492	150691_at	-0.73791	0.649222	-10.5766	6.95e-12	1.73e-10	16.9047	FBgn0039461	CG5500	CG5500	CG5500	43233	5355 // glucose transporter activity // inferred from electronic annotation	6810 // transport // inferred from electronic annotation	16020 // membrane // inferred from electronic annotation	---
11338	152537_at	-0.974282	1.60037	-10.5609	7.21e-12	1.79e-10	16.8674	FBgn0031723	CG7251	CG7251	CG7251	33791	5515 // protein binding // inferred from physical interaction	---	---	---
3984	145183_at	-1.38065	2.44753	-10.5589	7.25e-12	1.79e-10	16.8628	FBgn0030743	CG9921	CG9921	CG9921	32599	5515 // protein binding // inferred from physical interaction	---	---	IPR007667 // Hypoxia induced protein conserved region // 2.7E-42
7321	148520_at	-1.01514	1.94797	-10.5596	7.23e-12	1.79e-10	16.8645	FBgn0036082	CG12362	CG12362	CG12362	39193	4842 // ubiquitin-protein ligase activity // inferred from electronic annotation /// 8270 // zinc ion binding // inferred from electronic annotation /// 5515 // protein binding // inferred from physical interaction /// 5515 // protein binding // inferred from electronic annotation /// 46872 // metal ion binding // inferred from electronic annotation	16567 // protein ubiquitination // inferred from electronic annotation	151 // ubiquitin ligase complex // inferred from electronic annotation /// 5634 // nucleus // inferred from electronic annotation	IPR002867 // Zn-finger, cysteine-rich C6HC // 1.7E-32
1296	142495_at	-1.25476	2.06561	-10.5574	7.27e-12	1.79e-10	16.8592	FBgn0025111	CG1683	Ant2	Adenine nucleotide translocase 2	32008	5386 // carrier activity // inferred from sequence or structural similarity /// 5471 // ATP:ADP antiporter activity // inferred from sequence or structural similarity /// 5471 // ATP:ADP antiporter activity // non-traceable author statement /// 5488 // binding // inferred from electronic annotation /// 5386 // carrier activity // inferred from sequence similarity /// 5471 // ATP:ADP antiporter ac…	6139 // nucleobase, nucleoside, nucleotide and nucleic acid metabolism // inferred from electronic annotation /// 6812 // cation transport // inferred from electronic annotation /// 15866 // ADP transport // inferred from sequence or structural similarity /// 15867 // ATP transport // inferred from sequence or structural similarity /// 15866 // ADP transport // inferred from sequence similarity /…	5740 // mitochondrial envelope // inferred from sequence or structural similarity /// 5743 // mitochondrial inner membrane // inferred from sequence or structural similarity /// 5743 // mitochondrial inner membrane // non-traceable author statement /// 5740 // mitochondrial envelope // inferred from sequence similarity /// 5743 // mitochondrial inner membrane // inferred from sequence similarity	IPR001993 // Mitochondrial substrate carrier // 3.0E-37 /// IPR001993 // Mitochondrial substrate carrier // 4.6E-35 /// IPR001993 // Mitochondrial substrate carrier // 1.2E-21
4493	145692_at	-0.836644	4.34008	-10.553	7.35e-12	1.81e-10	16.8489	FBgn0031505	CG12400	CG12400	CG12400	33528	3954 // NADH dehydrogenase activity // inferred from sequence or structural similarity /// 8137 // NADH dehydrogenase (ubiquinone) activity // inferred from sequence or structural similarity /// 8137 // NADH dehydrogenase (ubiquinone) activity // inferred from electronic annotation /// 3954 // NADH dehydrogenase activity // inferred from sequence similarity /// 8137 // NADH dehydrogenase (ubiquin…	6120 // mitochondrial electron transport, NADH to ubiquinone // inferred from sequence or structural similarity /// 6120 // mitochondrial electron transport, NADH to ubiquinone // inferred from electronic annotation /// 6120 // mitochondrial electron transport, NADH to ubiquinone // inferred from sequence similarity	5747 // respiratory chain complex I (sensu Eukaryota) // inferred from sequence or structural similarity /// 5743 // mitochondrial inner membrane // inferred from electronic annotation /// 5747 // respiratory chain complex I (sensu Eukaryota) // inferred from sequence similarity	IPR009423 // NADH-ubiquinone oxidoreductase subunit b14.5b // 3.0E-17
1205	142404_s_at	-0.911732	1.6156	-10.5474	7.44e-12	1.82e-10	16.8356	FBgn0046225	CG17230	CG17230	CG17230	41376	5515 // protein binding // inferred from physical interaction	---	---	---
5160	146359_at	-0.902701	1.29172	-10.5476	7.44e-12	1.82e-10	16.8359	FBgn0032563	CG15258	CG15258	CG15258	34904	---	---	---	---
13135	154334_at	-0.683094	2.91947	-10.518	7.98e-12	1.94e-10	16.7659	FBgn0035404	CG12079	CG12079	CG12079	38378	3954 // NADH dehydrogenase activity // inferred from sequence or structural similarity /// 8137 // NADH dehydrogenase (ubiquinone) activity // inferred from sequence or structural similarity /// 5515 // protein binding // inferred from physical interaction /// 8137 // NADH dehydrogenase (ubiquinone) activity // inferred from electronic annotation /// 16491 // oxidoreductase activity // inferred f…	6120 // mitochondrial electron transport, NADH to ubiquinone // inferred from sequence or structural similarity /// 6118 // electron transport // inferred from electronic annotation /// 6120 // mitochondrial electron transport, NADH to ubiquinone // inferred from electronic annotation /// 6120 // mitochondrial electron transport, NADH to ubiquinone // inferred from sequence similarity	5747 // respiratory chain complex I (sensu Eukaryota) // inferred from sequence or structural similarity /// 5747 // respiratory chain complex I (sensu Eukaryota) // inferred from sequence similarity	IPR001268 // NADH dehydrogenase (ubiquinone), 30 kDa subunit // 8.5E-46
1504	142703_at	-0.766229	1.54673	-10.5096	8.13e-12	1.98e-10	16.746	FBgn0042094	CG6612	Adk3	Adenylate kinase-3	41318	4017 // adenylate kinase activity // inferred from sequence or structural similarity /// 4017 // adenylate kinase activity // non-traceable author statement /// 5524 // ATP binding // inferred from electronic annotation /// 46899 // nucleoside triphosphate adenylate kinase activity // inferred from sequence or structural similarity /// 5515 // protein binding // inferred from physical interaction…	6144 // purine base metabolism // inferred from electronic annotation /// 6172 // ADP biosynthesis // inferred from sequence or structural similarity /// 6139 // nucleobase, nucleoside, nucleotide and nucleic acid metabolism // inferred from electronic annotation /// 6172 // ADP biosynthesis // inferred from sequence similarity	5759 // mitochondrial matrix // inferred from sequence or structural similarity /// 5759 // mitochondrial matrix // inferred from sequence similarity	IPR000850 // Adenylate kinase // 1.4E-58 /// IPR007862 // Adenylate kinase, lid region // 1.3E-24
7487	148686_at	-0.768344	1.13442	-10.5016	8.29e-12	2e-10	16.7268	FBgn0036329	CG11262	CG11262	CG11262	39471	5215 // transporter activity // inferred from electronic annotation /// 8324 // cation transporter activity // inferred from electronic annotation /// 15137 // citrate transporter activity // inferred from electronic annotation	6810 // transport // inferred from electronic annotation /// 6811 // ion transport // inferred from electronic annotation /// 6812 // cation transport // inferred from electronic annotation /// 6820 // anion transport // inferred from electronic annotation /// 15746 // citrate transport // inferred from electronic annotation	16021 // integral to membrane // inferred from electronic annotation	---
11184	152383_at	-1.05148	4.62542	-10.5013	8.3e-12	2e-10	16.7262	FBgn0000116	CG32031	Argk	Arginine kinase	39041	4054 // arginine kinase activity // inferred from sequence or structural similarity /// 4054 // arginine kinase activity // non-traceable author statement /// 4054 // arginine kinase activity // inferred from electronic annotation /// 16301 // kinase activity // inferred from electronic annotation /// 16740 // transferase activity // inferred from electronic annotation /// 16772 // transferase ac…	16310 // phosphorylation // inferred from sequence or structural similarity /// 16310 // phosphorylation // inferred from sequence similarity	---	IPR000749 // ATP:guanido phosphotransferase // 8.4E-35 /// IPR000749 // ATP:guanido phosphotransferase // 1.0E-126 /// IPR000749 // ATP:guanido phosphotransferase // 8.4E-35 /// IPR000749 // ATP:guanido phosphotransferase // 1.0E-126 /// IPR000749 // ATP:guanido phosphotransferase // 8.4E-35 /// IPR000749 // ATP:guanido phosphotransferase // 1.0E-126 /// IPR000749 // ATP:guanido phosphotransferas…
6396	147595_at	-0.71429	2.63776	-10.4873	8.57e-12	2.07e-10	16.6929	FBgn0034576	CG9350	CG9350	CG9350	37385	5515 // protein binding // inferred from physical interaction	---	---	---
8440	149639_at	-0.93923	1.40607	-10.4707	8.92e-12	2.15e-10	16.6533	FBgn0037827	CG4073	CG4073	CG4073	41284	5515 // protein binding // inferred from physical interaction	---	---	---
188	141387_at	-0.95016	2.87243	-10.4471	9.42e-12	2.25e-10	16.5973	FBgn0035473	CG14981	mge	maggie	38459	15450 // protein translocase activity // inferred from sequence or structural similarity /// 15450 // protein translocase activity // inferred from sequence similarity	---	5739 // mitochondrion // inferred from direct assay /// 5742 // mitochondrial outer membrane translocase complex // inferred from sequence or structural similarity /// 5742 // mitochondrial outer membrane translocase complex // non-traceable author statement /// 5742 // mitochondrial outer membrane translocase complex // inferred from sequence similarity	---
11898	153097_at	-0.523395	1.70036	-10.4431	9.51e-12	2.27e-10	16.5877	FBgn0030004	CG10958	CG10958	CG10958	31736	---	---	---	---
11526	152725_at	-0.830965	2.04203	-10.4406	9.57e-12	2.28e-10	16.5817	FBgn0038708	CG6255	CG6255	CG6255	42326	4776 // succinate-CoA ligase (GDP-forming) activity // inferred from sequence or structural similarity /// 3824 // catalytic activity // inferred from electronic annotation /// 16874 // ligase activity // inferred from electronic annotation /// 4776 // succinate-CoA ligase (GDP-forming) activity // inferred from sequence similarity	6099 // tricarboxylic acid cycle // inferred from electronic annotation /// 8152 // metabolism // inferred from electronic annotation	45244 // succinate-CoA ligase complex (GDP-forming) // inferred from sequence or structural similarity /// 45244 // succinate-CoA ligase complex (GDP-forming) // inferred from sequence similarity	IPR003781 // CoA-binding domain // 4.9E-61 /// IPR005811 // ATP-citrate lyase/succinyl-CoA ligase // 2.2E-60
3549	144748_at	-0.456782	1.61405	-10.4319	9.77e-12	2.32e-10	16.5611	FBgn0052703	CG32703	CG32703	CG32703	31877	4674 // protein serine/threonine kinase activity // non-traceable author statement /// 4707 // MAP kinase activity // inferred from sequence or structural similarity /// 5524 // ATP binding // inferred from electronic annotation /// 5515 // protein binding // inferred from physical interaction /// 166 // nucleotide binding // inferred from electronic annotation /// 4672 // protein kinase activity…	165 // MAPKKK cascade // inferred from electronic annotation /// 6468 // protein amino acid phosphorylation // non-traceable author statement /// 6916 // anti-apoptosis // inferred from electronic annotation /// 8283 // cell proliferation // inferred from electronic annotation /// 6468 // protein amino acid phosphorylation // inferred from electronic annotation	---	IPR000719 // Protein kinase // 3.5E-80
7635	148834_at	-0.784058	0.89999	-10.4112	1.03e-11	2.43e-10	16.5116	FBgn0036547	CG17032	CG17032	CG17032	39736	5515 // protein binding // inferred from physical interaction	---	---	---
1632	142831_at	-0.855712	1.44046	-10.41	1.03e-11	2.43e-10	16.5088	FBgn0035139	CG13891	CG13891	CG13891	38066	---	---	---	---
408	141607_at	-0.638648	1.05623	-10.4088	1.03e-11	2.44e-10	16.5058	FBgn0024988	CG14801	CG14801	CG14801	31136	3676 // nucleic acid binding // inferred from electronic annotation /// 4527 // exonuclease activity // inferred from sequence or structural similarity /// 4532 // exoribonuclease activity // inferred from electronic annotation /// 4518 // nuclease activity // inferred from electronic annotation /// 4527 // exonuclease activity // inferred from electronic annotation /// 16787 // hydrolase activit…	6139 // nucleobase, nucleoside, nucleotide and nucleic acid metabolism // inferred from electronic annotation	5622 // intracellular // inferred from electronic annotation /// 5634 // nucleus // inferred from electronic annotation	IPR006055 // Exonuclease // 1.3E-36 /// IPR006055 // Exonuclease // 1.3E-36 /// IPR006055 // Exonuclease // 1.3E-36
6579	147778_at	-0.744171	1.30506	-10.4071	1.04e-11	2.44e-10	16.5018	FBgn0034863	CG12227	skpF	skpF	37713	4842 // ubiquitin-protein ligase activity // inferred from sequence or structural similarity /// 19237 // centromeric DNA binding // inferred from electronic annotation /// 5515 // protein binding // inferred from physical interaction /// 4842 // ubiquitin-protein ligase activity // inferred from sequence similarity	74 // regulation of progression through cell cycle // inferred from electronic annotation /// 6508 // proteolysis // inferred from electronic annotation /// 7059 // chromosome segregation // inferred from electronic annotation /// 7067 // mitosis // inferred from electronic annotation	152 // nuclear ubiquitin ligase complex // inferred from sequence or structural similarity /// 152 // nuclear ubiquitin ligase complex // inferred from sequence similarity	IPR001232 // SKP1 component // 1.6E-39 /// IPR001232 // SKP1 component // 2.2E-28
6105	147304_at	-1.01955	1.85692	-10.3932	1.07e-11	2.52e-10	16.4686	FBgn0034121	CG6262	CG6262	CG6262	36833	4555 // alpha,alpha-trehalase activity // inferred from electronic annotation /// 15927 // trehalase activity // inferred from sequence or structural similarity /// 16799 // hydrolase activity, hydrolyzing N-glycosyl compounds // inferred from electronic annotation /// 15927 // trehalase activity // inferred from sequence similarity	5984 // disaccharide metabolism // inferred from electronic annotation /// 5991 // trehalose metabolism // inferred from electronic annotation	---	IPR001661 // Glycoside hydrolase, family 37 // 9.4E-103 /// IPR001661 // Glycoside hydrolase, family 37 // 3.6E-63
3242	144441_at	-0.628885	1.63679	-10.3874	1.09e-11	2.55e-10	16.4547	FBgn0029661	CG16781	CG16781	CG16781	31315	5515 // protein binding // inferred from electronic annotation /// 8270 // zinc ion binding // inferred from electronic annotation /// 46872 // metal ion binding // inferred from electronic annotation	6512 // ubiquitin cycle // inferred from electronic annotation	5634 // nucleus // inferred from electronic annotation	IPR001841 // Zn-finger, RING // 4.7E-18
8218	149417_at	-0.860448	2.11617	-10.3866	1.09e-11	2.55e-10	16.4529	FBgn0037463	CG1984	djl	don juan like	40839	---	---	16007 // mitochondrial derivative // non-traceable author statement /// 19861 // flagellum // non-traceable author statement	---
8521	149720_at	-0.954802	1.07308	-10.3712	1.13e-11	2.63e-10	16.4159	FBgn0037970	CG12201	CG12201	CG12201	41449	5386 // carrier activity // inferred from sequence or structural similarity /// 5488 // binding // inferred from electronic annotation /// 15226 // carnitine transporter activity // inferred from sequence or structural similarity /// 15227 // acyl carnitine transporter activity // inferred from sequence or structural similarity /// 5386 // carrier activity // inferred from sequence similarity ///…	6629 // lipid metabolism // inferred from electronic annotation /// 6810 // transport // inferred from electronic annotation /// 6869 // lipid transport // inferred from electronic annotation	5740 // mitochondrial envelope // inferred from sequence or structural similarity /// 5743 // mitochondrial inner membrane // inferred from electronic annotation /// 5740 // mitochondrial envelope // inferred from sequence similarity	IPR001993 // Mitochondrial substrate carrier // 4.1E-19 /// IPR001993 // Mitochondrial substrate carrier // 2.0E-26 /// IPR001993 // Mitochondrial substrate carrier // 3.4E-28 /// IPR001993 // Mitochondrial substrate carrier // 4.1E-19 /// IPR001993 // Mitochondrial substrate carrier // 2.0E-26
11727	152926_at	-0.867809	5.84378	-10.3578	1.16e-11	2.71e-10	16.3841	FBgn0040992	CG10570	CG10570	CG10570	50466	5515 // protein binding // inferred from physical interaction	---	---	---
11771	152970_at	-0.66379	2.56004	-10.3582	1.16e-11	2.71e-10	16.385	FBgn0010548	CG11140	Aldh-III	Aldehyde dehydrogenase type III	45398	4028 // 3-chloroallyl aldehyde dehydrogenase activity // inferred from sequence or structural similarity /// 4030 // aldehyde dehydrogenase [NAD(P)+] activity // inferred from electronic annotation /// 16491 // oxidoreductase activity // inferred from electronic annotation /// 4028 // 3-chloroallyl aldehyde dehydrogenase activity // inferred from sequence similarity	6952 // defense response // inferred from electronic annotation /// 8152 // metabolism // inferred from electronic annotation /// 9636 // response to toxin // inferred from electronic annotation /// 6081 // aldehyde metabolism // inferred from electronic annotation	---	IPR002086 // Aldehyde dehydrogenase // 3.3E-32 /// IPR002086 // Aldehyde dehydrogenase // 8.4E-8 /// IPR002086 // Aldehyde dehydrogenase // 5.7E-49 /// IPR002086 // Aldehyde dehydrogenase // 1.3E-44 /// IPR002086 // Aldehyde dehydrogenase // 1.3E-44
2007	143206_at	-1.09089	3.81603	-10.3526	1.18e-11	2.74e-10	16.3715	FBgn0001281	CG7931	janB	janus B	43568	---	7548 // sex differentiation // inferred from expression pattern	---	IPR007702 // Janus/Ocnus // 3.1E-72
8589	149788_at	-0.712135	2.09823	-10.351	1.18e-11	2.74e-10	16.3678	FBgn0038067	CG11598	CG11598	CG11598	41554	4806 // triacylglycerol lipase activity // inferred from sequence or structural similarity /// 16298 // lipase activity // inferred from sequence or structural similarity /// 3824 // catalytic activity // inferred from electronic annotation /// 16787 // hydrolase activity // inferred from electronic annotation /// 16789 // carboxylic ester hydrolase activity // inferred from electronic annotation…	6629 // lipid metabolism // inferred from electronic annotation /// 6629 // lipid metabolism // inferred from sequence or structural similarity /// 16042 // lipid catabolism // inferred from electronic annotation /// 6629 // lipid metabolism // inferred from sequence similarity	---	IPR000073 // Alpha/beta hydrolase fold // 2.2E-14 /// IPR006693 // Ab-hydrolase associated lipase region // 3.7E-19 /// IPR000073 // Alpha/beta hydrolase fold // 2.2E-14 /// IPR006693 // Ab-hydrolase associated lipase region // 1.7E-20
4736	145935_at	-1.12942	2.5414	-10.3316	1.24e-11	2.86e-10	16.3213	FBgn0031878 /// FBgn0067929	CG9188	sip2 /// Dyaksip2	septin interacting protein 2 /// sip2	33979	5515 // protein binding // inferred from physical interaction	---	---	---
10666	151865_at	-0.84498	1.75791	-10.3213	1.27e-11	2.93e-10	16.2964	FBgn0035855	CG7366	CG7366	CG7366	38918	5515 // protein binding // inferred from physical interaction	---	---	---
13232	154431_at	-0.909604	3.21841	-10.3182	1.28e-11	2.95e-10	16.2891	FBgn0016122	CG10593	Acer	Angiotensin-converting enzyme-related	34189	4246 // peptidyl-dipeptidase A activity // inferred from sequence or structural similarity /// 4246 // peptidyl-dipeptidase A activity // non-traceable author statement /// 4246 // peptidyl-dipeptidase A activity // traceable author statement /// 8270 // zinc ion binding // inferred from electronic annotation /// 5515 // protein binding // inferred from physical interaction /// 4180 // carboxypep…	6508 // proteolysis // inferred from electronic annotation /// 7507 // heart development // inferred from mutant phenotype /// 6508 // proteolysis // traceable author statement	16020 // membrane // inferred from electronic annotation /// 5576 // extracellular region // inferred from direct assay	IPR001548 // Peptidase M2, peptidyl-dipeptidase A // 1.0E-126
12145	153344_at	-0.986412	4.95497	-10.3162	1.28e-11	2.95e-10	16.2843	FBgn0032833	CG10664	CG10664	CG10664	35279	4129 // cytochrome-c oxidase activity // inferred from sequence or structural similarity /// 5515 // protein binding // inferred from physical interaction /// 4129 // cytochrome-c oxidase activity // inferred from electronic annotation /// 4129 // cytochrome-c oxidase activity // inferred from sequence similarity	6123 // mitochondrial electron transport, cytochrome c to oxygen // inferred from sequence or structural similarity /// 6118 // electron transport // inferred from electronic annotation /// 6123 // mitochondrial electron transport, cytochrome c to oxygen // inferred from sequence similarity	5739 // mitochondrion // inferred from sequence or structural similarity /// 5743 // mitochondrial inner membrane // inferred from electronic annotation /// 5751 // respiratory chain complex IV (sensu Eukaryota) // inferred from sequence or structural similarity /// 5739 // mitochondrion // inferred from sequence similarity /// 5751 // respiratory chain complex IV (sensu Eukaryota) // inferred fr…	IPR004203 // Cytochrome c oxidase subunit IV // 1.3E-89
9331	150530_at	-0.543006	1.3686	-10.3104	1.3e-11	2.99e-10	16.2703	---	---	---	---	---	---	---	---	---
1977	143176_at	-0.891559	2.99997	-10.3011	1.33e-11	3.05e-10	16.2481	---	CG33756 /// CG33755	---	---	---	---	7283 // spermatogenesis // non-traceable author statement /// 9993 // oogenesis (sensu Insecta) // non-traceable author statement	---	IPR010849 // DiGeorge syndrome critical 6 // 1.0E-126
9957	151156_at	-0.91731	2.36251	-10.2989	1.34e-11	3.06e-10	16.2427	FBgn0040679	CG11373	CG11373	CG11373	50152	---	---	---	---
1072	142271_at	-0.899347	2.56687	-10.2854	1.38e-11	3.14e-10	16.2102	FBgn0026314	CG6649	Ugt35b	UDP-glycosyltransferase 35b	41333	15020 // glucuronosyltransferase activity // inferred from sequence or structural similarity /// 15020 // glucuronosyltransferase activity // non-traceable author statement /// 16740 // transferase activity // inferred from electronic annotation /// 16757 // transferase activity, transferring glycosyl groups // inferred from electronic annotation /// 16758 // transferase activity, transferring he…	5976 // polysaccharide metabolism // inferred from electronic annotation /// 6952 // defense response // inferred from electronic annotation /// 8202 // steroid metabolism // inferred from electronic annotation /// 9636 // response to toxin // inferred from electronic annotation /// 8152 // metabolism // inferred from electronic annotation	---	IPR002213 // UDP-glucoronosyl/UDP-glucosyl transferase // 5.4E-93
1193	142392_at	-0.946769	4.53527	-10.2847	1.38e-11	3.14e-10	16.2087	FBgn0042189	CG17376	CG17376	CG17376	59227	---	---	---	---
7009	148208_at	-0.929967	1.70499	-10.2762	1.41e-11	3.2e-10	16.1883	FBgn0035585	CG12027	CG12027	CG12027	38592	8553 // hydrogen-exporting ATPase activity, phosphorylative mechanism // non-traceable author statement /// 46933 // hydrogen-transporting ATP synthase activity, rotational mechanism // inferred from electronic annotation /// 46961 // hydrogen-transporting ATPase activity, rotational mechanism // inferred from electronic annotation	15986 // ATP synthesis coupled proton transport // inferred from electronic annotation	5753 // proton-transporting ATP synthase complex (sensu Eukaryota) // non-traceable author statement /// 16469 // proton-transporting two-sector ATPase complex // inferred from electronic annotation	IPR008387 // Mitochondrial ATP synthase coupling factor 6 // 2.7E-66
11181	152380_at	-1.27732	2.77787	-10.2728	1.42e-11	3.22e-10	16.1802	FBgn0031129	CG1324	CG1324	CG1324	33060	5515 // protein binding // inferred from physical interaction	---	---	---
9632	150831_at	-0.874574	2.99173	-10.2698	1.43e-11	3.24e-10	16.1729	FBgn0039678 /// FBgn0068109	CG18111	Obp99a /// DyakObp99a	Odorant-binding protein 99a /// Obp99a	43488	5549 // odorant binding // inferred from sequence or structural similarity /// 5549 // odorant binding // non-traceable author statement /// 5515 // protein binding // inferred from physical interaction /// 5549 // odorant binding // inferred from electronic annotation /// 5549 // odorant binding // inferred from sequence similarity	6810 // transport // inferred from electronic annotation /// 7606 // sensory perception of chemical stimulus // inferred from sequence or structural similarity /// 19236 // response to pheromone // inferred from sequence or structural similarity /// 42048 // olfactory behavior // inferred from sequence or structural similarity /// 7608 // sensory perception of smell // inferred from electronic an…	5576 // extracellular region // inferred from sequence or structural similarity /// 5576 // extracellular region // inferred from sequence similarity	IPR006170 // Pheromone/general odorant binding protein, PBP/GOBP // 1.2E-33
7088	148287_at	-1.07624	1.47295	-10.2691	1.44e-11	3.24e-10	16.1711	FBgn0035709	CG10124	CG10124	CG10124	38743	339 // RNA cap binding // inferred from sequence or structural similarity /// 3743 // translation initiation factor activity // inferred from sequence or structural similarity /// 3723 // RNA binding // inferred from electronic annotation /// 3743 // translation initiation factor activity // inferred from electronic annotation /// 339 // RNA cap binding // inferred from sequence similarity /// 37…	6413 // translational initiation // inferred from sequence or structural similarity /// 6413 // translational initiation // inferred from electronic annotation /// 6413 // translational initiation // inferred from sequence similarity	16281 // eukaryotic translation initiation factor 4F complex // inferred from sequence or structural similarity /// 5737 // cytoplasm // inferred from electronic annotation /// 16281 // eukaryotic translation initiation factor 4F complex // inferred from sequence similarity	IPR001040 // Eukaryotic translation initiation factor 4E (eIF-4E) // 6.3E-92
5702	146901_at	-1.25855	2.0646	-10.2668	1.44e-11	3.25e-10	16.1657	FBgn0033442	CG1690	CG1690	CG1690	36004	5515 // protein binding // inferred from physical interaction	---	---	---
10781	151980_at	-1.2183	1.52305	-10.2572	1.48e-11	3.32e-10	16.1425	FBgn0035620	CG5150	CG5150	CG5150	38633	4035 // alkaline phosphatase activity // inferred from sequence or structural similarity /// 19204 // nucleotide phosphatase activity // inferred from electronic annotation /// 4035 // alkaline phosphatase activity // inferred from sequence similarity	1501 // skeletal development // inferred from electronic annotation /// 7498 // mesoderm development // inferred from electronic annotation /// 8152 // metabolism // inferred from electronic annotation	---	IPR001952 // Alkaline phosphatase // 2.5E-84
1208	142407_at	-0.663236	1.84807	-10.2554	1.48e-11	3.33e-10	16.1381	FBgn0036622	CG4753	CG4753	CG4753	39819	3841 // 1-acylglycerol-3-phosphate O-acyltransferase activity // inferred from sequence or structural similarity /// 8415 // acyltransferase activity // inferred from electronic annotation /// 3841 // 1-acylglycerol-3-phosphate O-acyltransferase activity // inferred from sequence similarity	8152 // metabolism // inferred from electronic annotation	---	IPR002123 // Phospholipid/glycerol acyltransferase // 8.0E-9
1368	142567_at	-0.673687	1.96569	-10.2472	1.51e-11	3.39e-10	16.1186	FBgn0028372	CG11025	isopeptidase-T-3	isopeptidase-T-3	37261	4221 // ubiquitin thiolesterase activity // non-traceable author statement /// 5515 // protein binding // inferred from physical interaction	---	---	IPR000449 // Ubiquitin-associated domain // 1.3E-7 /// IPR000449 // Ubiquitin-associated domain // 3.5E-11 /// IPR000449 // Ubiquitin-associated domain // 1.3E-7 /// IPR000449 // Ubiquitin-associated domain // 3.5E-11
11858	153057_at	-1.14772	2.04185	-10.2399	1.54e-11	3.43e-10	16.101	FBgn0031476	CG8813	CG8813	CG8813	33490	5515 // protein binding // inferred from physical interaction	---	---	---
6608	147807_at	-0.872835	1.11857	-10.221	1.61e-11	3.56e-10	16.0553	FBgn0034907	CG5539	CG5539	CG5539	37766	---	---	---	IPR004345 // TB2/DP1 and HVA22 related protein // 2.7E-9
6875	148074_at	-0.850425	1.92753	-10.2147	1.64e-11	3.6e-10	16.04	FBgn0035384	CG2113	CG2113	CG2113	38356	---	---	---	---
9250	150449_at	-0.808312	1.43068	-10.2147	1.64e-11	3.6e-10	16.0402	FBgn0039083	CG10177	CG10177	CG10177	42772	4674 // protein serine/threonine kinase activity // inferred from sequence or structural similarity /// 4674 // protein serine/threonine kinase activity // non-traceable author statement /// 5524 // ATP binding // inferred from electronic annotation /// 166 // nucleotide binding // inferred from electronic annotation /// 4672 // protein kinase activity // inferred from electronic annotation /// 4…	6468 // protein amino acid phosphorylation // non-traceable author statement /// 7165 // signal transduction // inferred from electronic annotation /// 7242 // intracellular signaling cascade // inferred from electronic annotation /// 6468 // protein amino acid phosphorylation // inferred from electronic annotation /// 30154 // cell differentiation // inferred from electronic annotation	---	IPR003533 // Doublecortin // 2.8E-24 /// IPR000719 // Protein kinase // 9.3E-57
5347	146546_at	-0.811707	1.79996	-10.2133	1.64e-11	3.61e-10	16.0366	FBgn0032867	CG15475	CG15475	CG15475	35319	---	---	---	---
9404	150603_at	-1.00192	3.42474	-10.2037	1.68e-11	3.68e-10	16.0136	FBgn0039358	CG5028	CG5028	CG5028	43102	4449 // isocitrate dehydrogenase (NAD+) activity // inferred from sequence or structural similarity /// 4449 // isocitrate dehydrogenase (NAD+) activity // inferred from electronic annotation /// 16491 // oxidoreductase activity // inferred from electronic annotation /// 4449 // isocitrate dehydrogenase (NAD+) activity // inferred from sequence similarity	6099 // tricarboxylic acid cycle // inferred from sequence or structural similarity /// 8652 // amino acid biosynthesis // inferred from electronic annotation /// 6099 // tricarboxylic acid cycle // inferred from electronic annotation /// 8152 // metabolism // inferred from electronic annotation /// 6099 // tricarboxylic acid cycle // inferred from sequence similarity	5739 // mitochondrion // inferred from sequence or structural similarity /// 5759 // mitochondrial matrix // inferred from sequence or structural similarity /// 5739 // mitochondrion // inferred from electronic annotation /// 5739 // mitochondrion // inferred from sequence similarity /// 5759 // mitochondrial matrix // inferred from sequence similarity	IPR001804 // Isocitrate/isopropylmalate dehydrogenase // 9.3E-68
1071	142270_at	-1.20119	2.48357	-10.1997	1.69e-11	3.7e-10	16.004	FBgn0069354	CG17137	Porin2	Porin2	34499	5261 // cation channel activity // inferred from direct assay /// 8308 // voltage-gated ion-selective channel activity // inferred from sequence or structural similarity /// 15288 // porin activity // inferred from direct assay /// 15482 // voltage-gated anion channel porin activity // non-traceable author statement /// 8308 // voltage-gated ion-selective channel activity // inferred from electro…	6820 // anion transport // inferred from electronic annotation /// 6839 // mitochondrial transport // inferred from sequence or structural similarity /// 6839 // mitochondrial transport // inferred from sequence similarity	5739 // mitochondrion // inferred from sequence or structural similarity /// 5741 // mitochondrial outer membrane // inferred from sequence or structural similarity /// 5741 // mitochondrial outer membrane // inferred from electronic annotation /// 16021 // integral to membrane // inferred from electronic annotation /// 19867 // outer membrane // inferred from electronic annotation /// 5739 // mi…	IPR001925 // Porin, eukaryotic type // 2.4E-46
7598	148797_at	-0.811756	1.57185	-10.1945	1.72e-11	3.75e-10	15.9913	FBgn0036490	CG6888	CG6888	CG6888	39658	8379 // thioredoxin peroxidase activity // inferred from sequence or structural similarity /// 4601 // peroxidase activity // inferred from electronic annotation /// 16209 // antioxidant activity // inferred from electronic annotation /// 16491 // oxidoreductase activity // inferred from electronic annotation /// 8379 // thioredoxin peroxidase activity // inferred from sequence similarity	6800 // oxygen and reactive oxygen species metabolism // inferred from electronic annotation /// 6952 // defense response // inferred from electronic annotation	---	IPR000866 // Alkyl hydroperoxide reductase/ Thiol specific antioxidant/ Mal allergen // 9.1E-65
11708	152907_at	-1.10162	2.26628	-10.1872	1.75e-11	3.79e-10	15.9738	FBgn0004364	CG8896	18w	18 wheeler	37277	4888 // transmembrane receptor activity // inferred from sequence or structural similarity /// 4888 // transmembrane receptor activity // inferred from electronic annotation /// 4888 // transmembrane receptor activity // inferred from sequence similarity	6952 // defense response // traceable author statement /// 6955 // immune response // inferred from expression pattern /// 6961 // antibacterial humoral response (sensu Protostomia) // inferred from mutant phenotype /// 6961 // antibacterial humoral response (sensu Protostomia) // non-traceable author statement /// 6961 // antibacterial humoral response (sensu Protostomia) // traceable author sta…	5624 // membrane fraction // inferred from direct assay /// 5737 // cytoplasm // inferred from direct assay /// 5886 // plasma membrane // inferred from direct assay /// 5886 // plasma membrane // inferred from sequence or structural similarity /// 16021 // integral to membrane // inferred from sequence or structural similarity /// 16020 // membrane // inferred from electronic annotation /// 5886…	IPR001611 // Leucine-rich repeat // 0.14 /// IPR001611 // Leucine-rich repeat // 0.1 /// IPR001611 // Leucine-rich repeat // 0.091 /// IPR001611 // Leucine-rich repeat // 2.0E-4 /// IPR001611 // Leucine-rich repeat // 3.3E-5 /// IPR001611 // Leucine-rich repeat // 0.023 /// IPR001611 // Leucine-rich repeat // 0.0037 /// IPR001611 // Leucine-rich repeat // 0.019 /// IPR001611 // Leucine-rich repea…
6469	147668_at	-1.08794	2.30196	-10.1818	1.77e-11	3.84e-10	15.9606	FBgn0050278	CG30278	CG30278	CG30278	246523	---	---	---	---
989	142188_at	-1.02415	1.898	-10.1671	1.83e-11	3.95e-10	15.9251	FBgn0053189	CG33189	CG33189	CG33189	326328	---	---	---	---
6279	147478_at	-1.3834	2.21887	-10.1443	1.94e-11	4.15e-10	15.8699	FBgn0034416	CG15109	CG15109	CG15109	37195	---	---	---	---
4753	145952_at	-0.793479	2.12743	-10.142	1.95e-11	4.16e-10	15.8644	FBgn0031905	CG5155	CG5155	CG5155	34014	5488 // binding // inferred from electronic annotation	---	---	IPR000225 // Armadillo // 5.7E-7
4518	145717_at	-0.913766	3.63974	-10.1295	2.01e-11	4.25e-10	15.8342	FBgn0031545	CG3213	CG3213	CG3213	33574	3735 // structural constituent of ribosome // inferred from electronic annotation	6412 // protein biosynthesis // inferred from electronic annotation	5622 // intracellular // inferred from electronic annotation /// 5840 // ribosome // inferred from electronic annotation	---
9895	151094_at	-1.55998	1.33903	-10.1304	2e-11	4.25e-10	15.8362	FBgn0040609	CG3348	CG3348	CG3348	50082	5515 // protein binding // inferred from physical interaction /// 8061 // chitin binding // inferred from electronic annotation	6030 // chitin metabolism // inferred from electronic annotation	5576 // extracellular region // inferred from electronic annotation	---
7500	148699_at	-0.654204	1.11245	-10.1246	2.03e-11	4.29e-10	15.8222	FBgn0036346	CG11251	CG11251	CG11251	39490	16829 // lyase activity // inferred from electronic annotation /// 16831 // carboxy-lyase activity // inferred from electronic annotation /// 16853 // isomerase activity // inferred from electronic annotation /// 3824 // catalytic activity // inferred from electronic annotation	6520 // amino acid metabolism // inferred from electronic annotation /// 9063 // amino acid catabolism // inferred from electronic annotation /// 8152 // metabolism // inferred from electronic annotation	---	IPR002529 // Fumarylacetoacetate (FAA) hydrolase // 5.8E-42
6435	147634_at	-1.18818	1.50968	-10.1211	2.05e-11	4.31e-10	15.8138	FBgn0034658	CG7975	Grx-1	Grx-1	37483	30508 // thiol-disulfide exchange intermediate activity // non-traceable author statement	6118 // electron transport // inferred from electronic annotation /// 6790 // sulfur metabolism // inferred from electronic annotation /// 45454 // cell redox homeostasis // inferred from electronic annotation	---	IPR002109 // Glutaredoxin // 6.2E-26
10707	151906_at	-1.09451	3.08741	-10.1166	2.07e-11	4.35e-10	15.8027	FBgn0038052	CG5538	CG5538	CG5538	41537	---	---	---	---
5225	146424_at	-0.786128	2.08131	-10.0842	2.24e-11	4.7e-10	15.7241	FBgn0032664	CG5755	CG5755	CG5755	35081	5488 // binding // inferred from electronic annotation	6810 // transport // inferred from electronic annotation	16020 // membrane // inferred from electronic annotation /// 16021 // integral to membrane // inferred from electronic annotation	IPR001993 // Mitochondrial substrate carrier // 5.1E-6
4575	145774_at	-0.645766	1.06591	-10.0823	2.25e-11	4.71e-10	15.7195	FBgn0031623	CG15632	Taf12L	TBP-associated factor 30kD subunit 2	33672	16251 // general RNA polymerase II transcription factor activity // inferred from sequence or structural similarity /// 16251 // general RNA polymerase II transcription factor activity // inferred from sequence similarity	6367 // transcription initiation from RNA polymerase II promoter // inferred from sequence or structural similarity /// 7140 // male meiosis // non-traceable author statement /// 7283 // spermatogenesis // non-traceable author statement /// 6352 // transcription initiation // inferred from electronic annotation /// 6367 // transcription initiation from RNA polymerase II promoter // inferred from …	5669 // transcription factor TFIID complex // inferred from sequence or structural similarity /// 5669 // transcription factor TFIID complex // inferred from electronic annotation /// 5669 // transcription factor TFIID complex // inferred from sequence similarity	IPR003228 // Transcription initiation factor TFIID // 1.9E-41
4064	145263_at	-0.667777	0.985555	-10.0769	2.28e-11	4.76e-10	15.7065	FBgn0030872	CG6492	Ucp4A	Ucp4A	32764	5386 // carrier activity // inferred from sequence or structural similarity /// 5488 // binding // inferred from electronic annotation /// 17077 // oxidative phosphorylation uncoupler activity // inferred from sequence or structural similarity /// 5215 // transporter activity // inferred from electronic annotation /// 5386 // carrier activity // inferred from sequence similarity /// 17077 // oxid…	6839 // mitochondrial transport // inferred from electronic annotation /// 15992 // proton transport // inferred from sequence or structural similarity /// 6810 // transport // inferred from electronic annotation /// 15992 // proton transport // inferred from sequence similarity	5740 // mitochondrial envelope // inferred from sequence or structural similarity /// 5743 // mitochondrial inner membrane // inferred from sequence or structural similarity /// 5739 // mitochondrion // inferred from electronic annotation /// 5743 // mitochondrial inner membrane // inferred from electronic annotation /// 16020 // membrane // inferred from electronic annotation /// 16021 // integr…	IPR001993 // Mitochondrial substrate carrier // 3.3E-23 /// IPR001993 // Mitochondrial substrate carrier // 8.9E-27 /// IPR001993 // Mitochondrial substrate carrier // 1.7E-29
9651	150850_at	-1.09168	2.1863	-10.0719	2.3e-11	4.79e-10	15.6942	FBgn0039707	CG15510	CG15510	CG15510	43526	---	---	---	---
10931	152130_at	-1.14185	4.24634	-10.0734	2.29e-11	4.79e-10	15.698	FBgn0034132	CG4439	CG4439	CG4439	36844	4178 // leucyl aminopeptidase activity // inferred from sequence or structural similarity /// 4177 // aminopeptidase activity // inferred from electronic annotation /// 4178 // leucyl aminopeptidase activity // inferred from sequence similarity	6508 // proteolysis // inferred from electronic annotation	5622 // intracellular // inferred from electronic annotation	IPR000819 // Peptidase M17, cytosol aminopeptidase, C-terminal // 9.4E-48 /// IPR000819 // Peptidase M17, cytosol aminopeptidase, C-terminal // 5.4E-14 /// IPR008283 // Peptidase M17, cytosol aminopeptidase, N-terminal // 3.3E-64
11707	152906_at	-0.835956	2.77476	-10.0729	2.3e-11	4.79e-10	15.6968	FBgn0037375	CG1193	CG1193	CG1193	40715	166 // nucleotide binding // inferred from electronic annotation /// 5524 // ATP binding // inferred from electronic annotation /// 8017 // microtubule binding // inferred from sequence or structural similarity /// 16887 // ATPase activity // inferred from sequence or structural similarity /// 17111 // nucleoside-triphosphatase activity // inferred from electronic annotation /// 8017 // microtubu…	6886 // intracellular protein transport // inferred from electronic annotation /// 7017 // microtubule-based process // inferred from sequence or structural similarity /// 51013 // microtubule severing // inferred from sequence or structural similarity /// 7017 // microtubule-based process // inferred from sequence similarity /// 51013 // microtubule severing // inferred from sequence similarity	5783 // endoplasmic reticulum // inferred from sequence or structural similarity /// 5875 // microtubule associated complex // inferred from sequence or structural similarity /// 8352 // katanin // inferred from sequence or structural similarity /// 5783 // endoplasmic reticulum // inferred from sequence similarity /// 5875 // microtubule associated complex // inferred from sequence similarity //…	IPR003959 // AAA ATPase, central region // 2.7E-77 /// IPR003959 // AAA ATPase, central region // 2.7E-77
43	141242_at	-0.961462	1.27341	-10.0623	2.36e-11	4.89e-10	15.671	FBgn0034388 /// FBgn0054020	CG15092	CG15092 /// CG34020	CG15092 /// CG34020	37164 /// 3885593	5515 // protein binding // inferred from physical interaction	---	---	---
8058	149257_at	-0.653208	1.38302	-10.0595	2.37e-11	4.92e-10	15.6641	FBgn0037195	CG11226	CG11226	CG11226	40501	---	---	---	---
9638	150837_at	-1.85065	1.20653	-10.0581	2.38e-11	4.93e-10	15.6607	FBgn0039685	CG7592	Obp99b	Odorant-binding protein 99b	43497	5549 // odorant binding // inferred from electronic annotation /// 5549 // odorant binding // inferred from sequence or structural similarity /// 5549 // odorant binding // non-traceable author statement /// 5549 // odorant binding // inferred from sequence similarity	6810 // transport // inferred from electronic annotation /// 7606 // sensory perception of chemical stimulus // inferred from sequence or structural similarity /// 19236 // response to pheromone // inferred from sequence or structural similarity /// 35071 // salivary gland cell autophagic cell death // inferred from expression pattern /// 42048 // olfactory behavior // inferred from sequence or s…	5576 // extracellular region // inferred from sequence or structural similarity /// 5576 // extracellular region // inferred from sequence similarity	IPR006170 // Pheromone/general odorant binding protein, PBP/GOBP // 5.8E-31
8659	149858_at	-1.10926	2.84672	-10.0424	2.47e-11	5.09e-10	15.6224	FBgn0038175	CG9602	CG9602	CG9602	41682	4840 // ubiquitin conjugating enzyme activity // inferred from electronic annotation /// 4842 // ubiquitin-protein ligase activity // inferred from sequence or structural similarity /// 4842 // ubiquitin-protein ligase activity // inferred from electronic annotation /// 16874 // ligase activity // inferred from electronic annotation /// 4842 // ubiquitin-protein ligase activity // inferred from s…	6464 // protein modification // inferred from electronic annotation /// 6512 // ubiquitin cycle // inferred from electronic annotation /// 19538 // protein metabolism // inferred from electronic annotation	---	IPR000608 // Ubiquitin-conjugating enzymes // 3.2E-85 /// IPR000608 // Ubiquitin-conjugating enzymes // 3.2E-85
10194	151393_s_at	-0.725128	3.71555	-10.04	2.49e-11	5.11e-10	15.6167	FBgn0029971	CG18624	CG18624	CG18624	31697	3954 // NADH dehydrogenase activity // inferred from sequence or structural similarity /// 3954 // NADH dehydrogenase activity // inferred from sequence similarity	6120 // mitochondrial electron transport, NADH to ubiquinone // inferred from sequence or structural similarity /// 6120 // mitochondrial electron transport, NADH to ubiquinone // inferred from sequence similarity	5747 // respiratory chain complex I (sensu Eukaryota) // inferred from sequence or structural similarity /// 5747 // respiratory chain complex I (sensu Eukaryota) // inferred from sequence similarity	---
9984	151183_at	-0.601264	1.16179	-10.0143	2.65e-11	5.43e-10	15.554	FBgn0040706	CG12677	CG12677	CG12677	50179	---	---	---	---
3464	144663_at	-0.879072	3.01622	-10.0078	2.69e-11	5.5e-10	15.5382	FBgn0029971	CG18624	CG18624	CG18624	31697	3954 // NADH dehydrogenase activity // inferred from sequence or structural similarity /// 3954 // NADH dehydrogenase activity // inferred from sequence similarity	6120 // mitochondrial electron transport, NADH to ubiquinone // inferred from sequence or structural similarity /// 6120 // mitochondrial electron transport, NADH to ubiquinone // inferred from sequence similarity	5747 // respiratory chain complex I (sensu Eukaryota) // inferred from sequence or structural similarity /// 5747 // respiratory chain complex I (sensu Eukaryota) // inferred from sequence similarity	---
4977	146176_at	-0.972207	0.658268	-10.0074	2.69e-11	5.5e-10	15.5372	FBgn0032276	CG17098	CG17098	CG17098	34462	3676 // nucleic acid binding // inferred from electronic annotation /// 8270 // zinc ion binding // inferred from electronic annotation	---	5634 // nucleus // inferred from electronic annotation	---
11405	152604_at	-1.06049	3.18039	-9.99892	2.75e-11	5.61e-10	15.5165	FBgn0036015	CG3088	CG3088	CG3088	39115	3735 // structural constituent of ribosome // inferred from electronic annotation /// 4252 // serine-type endopeptidase activity // non-traceable author statement /// 4263 // chymotrypsin activity // inferred from electronic annotation /// 4295 // trypsin activity // inferred from electronic annotation /// 5515 // protein binding // inferred from physical interaction /// 4252 // serine-type endop…	6412 // protein biosynthesis // inferred from electronic annotation /// 6508 // proteolysis // inferred from electronic annotation	5622 // intracellular // inferred from electronic annotation /// 5840 // ribosome // inferred from electronic annotation	IPR001254 // Peptidase S1, chymotrypsin // 7.3E-35
11292	152491_at	-0.733744	0.920674	-9.9877	2.82e-11	5.74e-10	15.4891	FBgn0034957	CG3121	CG3121	CG3121	37831	5200 // structural constituent of cytoskeleton // inferred from electronic annotation /// 8017 // microtubule binding // inferred from sequence or structural similarity /// 8017 // microtubule binding // inferred from sequence similarity	7017 // microtubule-based process // inferred from sequence or structural similarity /// 7017 // microtubule-based process // inferred from sequence similarity	5875 // microtubule associated complex // inferred from sequence or structural similarity /// 5875 // microtubule associated complex // inferred from sequence similarity	IPR006802 // Radial spokehead-like protein // 1.0E-126
7066	148265_at	-0.742487	1.70224	-9.98258	2.86e-11	5.81e-10	15.4766	FBgn0035679	CG10467	CG10467	CG10467	38697	4034 // aldose 1-epimerase activity // inferred from sequence or structural similarity /// 4034 // aldose 1-epimerase activity // inferred from electronic annotation /// 4034 // aldose 1-epimerase activity // inferred from sequence similarity	5996 // monosaccharide metabolism // inferred from electronic annotation /// 6012 // galactose metabolism // inferred from electronic annotation	---	IPR008183 // Aldose 1-epimerase // 1.0E-126
5635	146834_at	-0.99289	1.78777	-9.97948	2.88e-11	5.84e-10	15.469	FBgn0033330	CG8746	CG8746	CG8746	35867	---	---	---	---
370	141569_at	-1.00456	3.31923	-9.96946	2.95e-11	5.98e-10	15.4445	FBgn0039122	CG10192	CG10192	CG10192	42819	3729 // mRNA binding // inferred from electronic annotation /// 3743 // translation initiation factor activity // inferred from sequence or structural similarity /// 3723 // RNA binding // inferred from electronic annotation /// 3743 // translation initiation factor activity // inferred from sequence similarity	6413 // translational initiation // inferred from sequence or structural similarity /// 6445 // regulation of translation // inferred from electronic annotation /// 35071 // salivary gland cell autophagic cell death // inferred from expression pattern /// 48102 // autophagic cell death // inferred from expression pattern /// 6413 // translational initiation // inferred from sequence similarity	16281 // eukaryotic translation initiation factor 4F complex // inferred from sequence or structural similarity /// 16281 // eukaryotic translation initiation factor 4F complex // inferred from sequence similarity	IPR003890 // Initiation factor eIF-4 gamma, middle // 2.1E-66 /// IPR003891 // Initiation factor eIF-4 gamma, MA3 // 7.0E-37
4430	145629_at	-0.888928	1.69877	-9.95796	3.03e-11	6.13e-10	15.4164	FBgn0031407	CG4270	CG4270	CG4270	33408	5515 // protein binding // inferred from physical interaction	---	5576 // extracellular region // inferred from electronic annotation	IPR001283 // Allergen V5/Tpx-1 related // 1.1E-29 /// IPR001283 // Allergen V5/Tpx-1 related // 5.9E-36
11689	152888_at	-0.956807	1.80572	-9.95714	3.04e-11	6.13e-10	15.4144	FBgn0033969	CG10202	CG10202	CG10202	36649	4615 // phosphomannomutase activity // inferred from sequence or structural similarity /// 16868 // intramolecular transferase activity, phosphotransferases // inferred from electronic annotation /// 4615 // phosphomannomutase activity // inferred from sequence similarity	5996 // monosaccharide metabolism // inferred from electronic annotation /// 5975 // carbohydrate metabolism // inferred from electronic annotation	---	IPR005844 // Phosphoglucomutase/phosphomannomutase alpha/beta/alpha domain I // 8.2E-38
1207	142406_at	-0.497133	1.32567	-9.95	3.09e-11	6.23e-10	15.3969	FBgn0036236	CG6931	CG6931	CG6931	39363	---	---	---	---
5270	146469_at	-0.883915	1.52247	-9.94615	3.12e-11	6.26e-10	15.3875	FBgn0032740	CG15172	CG15172	CG15172	35167	---	---	---	---
8554	149753_at	-0.703721	0.71269	-9.94231	3.15e-11	6.31e-10	15.3781	FBgn0038018	CG10090	Tim17a1	Tim17a1	41500	8565 // protein transporter activity // inferred from sequence or structural similarity /// 15450 // protein translocase activity // inferred from sequence or structural similarity /// 8565 // protein transporter activity // inferred from electronic annotation /// 8565 // protein transporter activity // inferred from sequence similarity /// 15450 // protein translocase activity // inferred from s…	6626 // protein targeting to mitochondrion // inferred from sequence or structural similarity /// 45039 // protein import into mitochondrial inner membrane // inferred from sequence or structural similarity /// 6605 // protein targeting // inferred from electronic annotation /// 6810 // transport // inferred from electronic annotation /// 15031 // protein transport // inferred from electronic ann…	5744 // mitochondrial inner membrane presequence translocase complex // inferred from sequence or structural similarity /// 16021 // integral to membrane // inferred from sequence or structural similarity /// 5739 // mitochondrion // inferred from electronic annotation /// 5743 // mitochondrial inner membrane // inferred from electronic annotation /// 16020 // membrane // inferred from electronic…	IPR003397 // Mitochondrial import inner membrane translocase, subunit Tim17/22 // 7.2E-57
5945	147144_at	-1.00047	1.43125	-9.93374	3.21e-11	6.43e-10	15.3571	FBgn0033826	CG4734	CG4734	CG4734	36477	---	---	---	---
7758	148957_at	-1.37168	5.70276	-9.93193	3.23e-11	6.45e-10	15.3527	FBgn0036728	CG7580	CG7580	CG7580	39950	8121 // ubiquinol-cytochrome-c reductase activity // inferred from sequence or structural similarity /// 48039 // ubiquinone binding // inferred from sequence or structural similarity /// 8121 // ubiquinol-cytochrome-c reductase activity // inferred from electronic annotation /// 8121 // ubiquinol-cytochrome-c reductase activity // inferred from sequence similarity /// 48039 // ubiquinone binding…	6122 // mitochondrial electron transport, ubiquinol to cytochrome c // inferred from sequence or structural similarity /// 6118 // electron transport // inferred from electronic annotation /// 6122 // mitochondrial electron transport, ubiquinol to cytochrome c // inferred from sequence similarity	5750 // respiratory chain complex III (sensu Eukaryota) // inferred from sequence or structural similarity /// 5750 // respiratory chain complex III (sensu Eukaryota) // inferred from sequence similarity	IPR004205 // UcrQ // 1.7E-50
11799	152998_at	-0.766997	1.53837	-9.9311	3.24e-11	6.45e-10	15.3506	FBgn0034882	CG5398	CG5398	CG5398	37736	15250 // water channel activity // inferred from sequence or structural similarity /// 5215 // transporter activity // inferred from electronic annotation /// 15250 // water channel activity // inferred from sequence similarity	6810 // transport // inferred from electronic annotation /// 19725 // cell homeostasis // inferred from electronic annotation	16020 // membrane // inferred from electronic annotation /// 16021 // integral to membrane // inferred from electronic annotation	IPR000425 // Major intrinsic protein // 3.2E-20
4675	145874_at	-0.771	2.029	-9.91873	3.33e-11	6.62e-10	15.3203	FBgn0031784	CG9222	CG9222	CG9222	33867	4672 // protein kinase activity // non-traceable author statement /// 4674 // protein serine/threonine kinase activity // inferred from sequence or structural similarity /// 4702 // receptor signaling protein serine/threonine kinase activity // inferred from electronic annotation /// 5524 // ATP binding // inferred from electronic annotation /// 166 // nucleotide binding // inferred from electron…	6468 // protein amino acid phosphorylation // non-traceable author statement /// 7010 // cytoskeleton organization and biogenesis // inferred from electronic annotation /// 6468 // protein amino acid phosphorylation // inferred from electronic annotation	---	IPR000719 // Protein kinase // 5.9E-73
10988	152187_at	-0.774268	4.6129	-9.91581	3.36e-11	6.66e-10	15.3132	FBgn0038224	CG3321	CG3321	CG3321	41745	8553 // hydrogen-exporting ATPase activity, phosphorylative mechanism // inferred from sequence or structural similarity /// 46933 // hydrogen-transporting ATP synthase activity, rotational mechanism // inferred from electronic annotation /// 46961 // hydrogen-transporting ATPase activity, rotational mechanism // inferred from electronic annotation /// 8553 // hydrogen-exporting ATPase activity, …	15986 // ATP synthesis coupled proton transport // inferred from electronic annotation /// 15992 // proton transport // inferred from sequence or structural similarity /// 15992 // proton transport // inferred from sequence similarity	276 // proton-transporting ATP synthase complex, coupling factor F(o) (sensu Eukaryota) // inferred from sequence or structural similarity /// 16469 // proton-transporting two-sector ATPase complex // inferred from electronic annotation /// 276 // proton-transporting ATP synthase complex, coupling factor F(o) (sensu Eukaryota) // inferred from sequence similarity	IPR008386 // ATP synthase E // 3.2E-46
7333	148532_at	-0.82186	1.78762	-9.90052	3.48e-11	6.89e-10	15.2757	FBgn0053493	CG6463	CG33493	CG33493	2768994	5515 // protein binding // inferred from physical interaction /// 16651 // oxidoreductase activity, acting on NADH or NADPH // inferred from electronic annotation	6118 // electron transport // inferred from electronic annotation	5743 // mitochondrial inner membrane // inferred from electronic annotation	IPR003152 // PIK-related kinase, FATC // 2.8E-5 /// IPR006806 // ETC complex I subunit // 1.4E-36
11145	152344_at	-0.751127	1.51328	-9.89508	3.53e-11	6.98e-10	15.2623	FBgn0027795	CG14785	CG14785	CG14785	31094	---	---	---	---
10715	151914_at	-0.844911	2.5444	-9.89438	3.54e-11	6.98e-10	15.2606	FBgn0038771 /// FBgn0064430	CG4390	CG4390 /// DpseGA18152	CG4390 /// GA18152	42396	16787 // hydrolase activity // inferred from electronic annotation /// 16788 // hydrolase activity, acting on ester bonds // inferred from electronic annotation /// 3824 // catalytic activity // inferred from electronic annotation	---	---	IPR000801 // Putative esterase // 3.7E-79 /// IPR000801 // Putative esterase // 3.7E-79
11755	152954_at	-0.830735	0.972668	-9.85889	3.86e-11	7.58e-10	15.1734	FBgn0032769	CG10750	CG10750	CG10750	35206	5515 // protein binding // inferred from physical interaction	---	---	---
11857	153056_at	-1.0986	2.73255	-9.84566	3.98e-11	7.8e-10	15.1408	FBgn0037985	CG14735	CG14735	CG14735	41465	---	---	---	---
9118	150317_at	-0.543863	1.56424	-9.84266	4.01e-11	7.85e-10	15.1335	FBgn0038892	CG15498	CG15498	CG15498	42548	3676 // nucleic acid binding // inferred from electronic annotation	---	5634 // nucleus // inferred from electronic annotation	---
11586	152785_at	-0.596992	1.11645	-9.83595	4.08e-11	7.97e-10	15.117	FBgn0034500	CG11200	CG11200	CG11200	37301	4090 // carbonyl reductase (NADPH) activity // inferred from sequence or structural similarity /// 5515 // protein binding // inferred from physical interaction /// 16491 // oxidoreductase activity // inferred from electronic annotation /// 4090 // carbonyl reductase (NADPH) activity // inferred from sequence similarity	8152 // metabolism // inferred from electronic annotation	---	IPR002198 // Short-chain dehydrogenase/reductase SDR // 1.4E-36
7149	148348_at	-0.632956	1.68288	-9.82468	4.19e-11	8.18e-10	15.0892	FBgn0035800	CG7716	CG7716	CG7716	38852	5200 // structural constituent of cytoskeleton // inferred from sequence or structural similarity /// 8017 // microtubule binding // inferred from electronic annotation /// 5200 // structural constituent of cytoskeleton // inferred from sequence similarity	7020 // microtubule nucleation // inferred from sequence or structural similarity /// 7067 // mitosis // inferred from electronic annotation /// 226 // microtubule cytoskeleton organization and biogenesis // inferred from electronic annotation /// 7020 // microtubule nucleation // inferred from sequence similarity	5813 // centrosome // inferred from sequence or structural similarity /// 922 // spindle pole // inferred from electronic annotation /// 5815 // microtubule organizing center // inferred from electronic annotation /// 5813 // centrosome // inferred from sequence similarity	IPR007259 // Spc97/Spc98 // 1.0E-126
12110	153309_at	-0.91643	2.43434	-9.82189	4.22e-11	8.22e-10	15.0823	FBgn0037001	CG6020	CG6020	CG6020	40272	3954 // NADH dehydrogenase activity // inferred from sequence or structural similarity /// 8137 // NADH dehydrogenase (ubiquinone) activity // inferred from sequence or structural similarity /// 3824 // catalytic activity // inferred from electronic annotation /// 51287 // NAD binding // inferred from electronic annotation /// 3954 // NADH dehydrogenase activity // inferred from sequence similari…	6120 // mitochondrial electron transport, NADH to ubiquinone // inferred from sequence or structural similarity /// 9225 // nucleotide-sugar metabolism // inferred from electronic annotation /// 6120 // mitochondrial electron transport, NADH to ubiquinone // inferred from sequence similarity	5747 // respiratory chain complex I (sensu Eukaryota) // inferred from sequence or structural similarity /// 5747 // respiratory chain complex I (sensu Eukaryota) // inferred from sequence similarity	---
3170	144369_at	-0.713992	0.830749	-9.82009	4.24e-11	8.25e-10	15.0779	FBgn0040364	CG11378	CG11378	CG11378	31060	---	---	---	IPR009832 // Protein of unknown function DUF1397 // 1.0E-126
13764	154963_at	-0.746238	2.32095	-9.81573	4.28e-11	8.32e-10	15.0671	FBgn0032783	CG10237	CG10237	CG10237	35222	5386 // carrier activity // inferred from electronic annotation /// 8431 // vitamin E binding // inferred from sequence or structural similarity /// 16918 // retinal binding // inferred from sequence or structural similarity /// 5215 // transporter activity // inferred from electronic annotation /// 8431 // vitamin E binding // inferred from sequence similarity /// 16918 // retinal binding // inf…	6732 // coenzyme metabolism // inferred from electronic annotation /// 6810 // transport // inferred from electronic annotation /// 51189 // prosthetic group metabolism // inferred from electronic annotation	5622 // intracellular // inferred from electronic annotation	IPR001251 // Cellular retinaldehyde-binding)/triple function, C-terminal // 3.3E-36 /// IPR001251 // Cellular retinaldehyde-binding)/triple function, C-terminal // 3.3E-36 /// IPR001251 // Cellular retinaldehyde-binding)/triple function, C-terminal // 3.3E-36
1824	143023_at	-0.763149	1.46386	-9.81077	4.33e-11	8.39e-10	15.0549	FBgn0033243	CG14763	CG14763	CG14763	35757	42623 // ATPase activity, coupled // inferred from sequence or structural similarity /// 42623 // ATPase activity, coupled // inferred from sequence similarity	7018 // microtubule-based movement // inferred from sequence or structural similarity /// 7018 // microtubule-based movement // inferred from sequence similarity	5875 // microtubule associated complex // inferred from sequence or structural similarity /// 30286 // dynein complex // inferred from sequence or structural similarity /// 5875 // microtubule associated complex // inferred from sequence similarity /// 30286 // dynein complex // inferred from sequence similarity	IPR005334 // Tctex-1 family // 2.2E-7
4619	145818_s_at	-0.818315	5.33351	-9.81083	4.33e-11	8.39e-10	15.0551	FBgn0015031	CG14028	cype	cyclope	46040	4129 // cytochrome-c oxidase activity // inferred from sequence or structural similarity /// 4129 // cytochrome-c oxidase activity // inferred from sequence similarity	6123 // mitochondrial electron transport, cytochrome c to oxygen // inferred from sequence or structural similarity /// 6123 // mitochondrial electron transport, cytochrome c to oxygen // inferred from sequence similarity	5751 // respiratory chain complex IV (sensu Eukaryota) // inferred from sequence or structural similarity /// 5751 // respiratory chain complex IV (sensu Eukaryota) // inferred from sequence similarity	IPR004204 // Cytochrome c oxidase subunit VIc // 2.2E-49
11864	153063_at	-0.556305	2.3302	-9.81058	4.34e-11	8.39e-10	15.0544	FBgn0032713	CG17323	CG17323	CG17323	35138	15020 // glucuronosyltransferase activity // inferred from sequence or structural similarity /// 16740 // transferase activity // inferred from electronic annotation /// 16757 // transferase activity, transferring glycosyl groups // inferred from electronic annotation /// 16758 // transferase activity, transferring hexosyl groups // inferred from electronic annotation /// 15020 // glucuronosyltra…	5976 // polysaccharide metabolism // inferred from electronic annotation /// 6952 // defense response // inferred from electronic annotation /// 8202 // steroid metabolism // inferred from electronic annotation /// 9636 // response to toxin // inferred from electronic annotation /// 8152 // metabolism // inferred from electronic annotation	---	IPR002213 // UDP-glucoronosyl/UDP-glucosyl transferase // 1.9E-42
8534	149733_at	-0.842171	1.65775	-9.80829	4.36e-11	8.43e-10	15.0488	FBgn0051361	CG31361	dpr17	dpr17	41470	---	7275 // development // inferred from electronic annotation	16020 // membrane // inferred from electronic annotation /// 16021 // integral to membrane // inferred from electronic annotation	IPR007110 // Immunoglobulin-like // 0.018 /// IPR007110 // Immunoglobulin-like // 2.5E-9 /// IPR007110 // Immunoglobulin-like // 0.018 /// IPR007110 // Immunoglobulin-like // 2.5E-9
7052	148251_at	-2.30125	2.89289	-9.79256	4.53e-11	8.74e-10	15.01	FBgn0035661	CG10477	CG10477	CG10477	38679	4252 // serine-type endopeptidase activity // inferred from sequence or structural similarity /// 4263 // chymotrypsin activity // inferred from electronic annotation /// 4295 // trypsin activity // inferred from electronic annotation /// 42708 // elastase activity // non-traceable author statement /// 4252 // serine-type endopeptidase activity // inferred from sequence similarity	6508 // proteolysis // non-traceable author statement	---	IPR001254 // Peptidase S1, chymotrypsin // 1.6E-69
4886	146085_at	-0.535199	0.890388	-9.77868	4.69e-11	9.01e-10	14.9757	FBgn0032115	CG4438	CG4438	CG4438	34257	---	---	---	---
13691	154890_at	-0.63753	2.00032	-9.77854	4.69e-11	9.01e-10	14.9754	FBgn0036289	CG10657	CG10657	CG10657	39423	5386 // carrier activity // inferred from electronic annotation /// 16918 // retinal binding // inferred from sequence or structural similarity /// 5515 // protein binding // inferred from physical interaction /// 5215 // transporter activity // inferred from electronic annotation /// 16918 // retinal binding // inferred from sequence similarity	6732 // coenzyme metabolism // inferred from electronic annotation /// 6810 // transport // inferred from electronic annotation /// 51189 // prosthetic group metabolism // inferred from electronic annotation	5622 // intracellular // inferred from electronic annotation	IPR001251 // Cellular retinaldehyde-binding)/triple function, C-terminal // 1.3E-10
2980	144179_at	-0.819458	2.14888	-9.75864	4.92e-11	9.44e-10	14.9262	FBgn0027359	CG1728	Tim8	Tim8	32081	15450 // protein translocase activity // inferred from sequence or structural similarity /// 5515 // protein binding // inferred from physical interaction /// 15450 // protein translocase activity // inferred from sequence similarity	6626 // protein targeting to mitochondrion // inferred from sequence or structural similarity /// 15031 // protein transport // inferred from sequence or structural similarity /// 45039 // protein import into mitochondrial inner membrane // inferred from electronic annotation /// 6605 // protein targeting // inferred from electronic annotation /// 6626 // protein targeting to mitochondrion // inf…	5744 // mitochondrial inner membrane presequence translocase complex // inferred from sequence or structural similarity /// 5744 // mitochondrial inner membrane presequence translocase complex // non-traceable author statement /// 42721 // mitochondrial inner membrane protein insertion complex // inferred from electronic annotation /// 5739 // mitochondrion // inferred from electronic annotation …	IPR004217 // Zn-finger, Tim10/DDP type // 2.0E-29
12958	154157_at	-1.16765	3.16133	-9.74724	5.06e-11	9.65e-10	14.898	FBgn0027505	CG7061	rab3-GAP	rab3-GAP	34626	5097 // Rab GTPase activator activity // inferred from sequence or structural similarity /// 30234 // enzyme regulator activity // inferred from sequence or structural similarity /// 46982 // protein heterodimerization activity // inferred from sequence or structural similarity /// 5096 // GTPase activator activity // inferred from electronic annotation /// 5097 // Rab GTPase activator activity /…	7269 // neurotransmitter secretion // non-traceable author statement /// 16192 // vesicle-mediated transport // non-traceable author statement /// 43087 // regulation of GTPase activity // inferred from sequence or structural similarity /// 43087 // regulation of GTPase activity // inferred from sequence similarity	5625 // soluble fraction // inferred from sequence or structural similarity /// 8021 // synaptic vesicle // non-traceable author statement /// 5625 // soluble fraction // inferred from sequence similarity	---
11163	152362_at	-1.37693	4.13732	-9.73387	5.23e-11	9.94e-10	14.8649	FBgn0011559	CG7157	Acp36DE	Accessory gland peptide 36DE	35096	5179 // hormone activity // non-traceable author statement	7321 // sperm displacement // non-traceable author statement /// 42628 // mating plug formation // traceable author statement /// 45434 // negative regulation of female receptivity, post-mating // non-traceable author statement /// 46692 // sperm competition // traceable author statement /// 46693 // sperm storage // inferred from mutant phenotype /// 46693 // sperm storage // traceable author st…	5576 // extracellular region // non-traceable author statement /// 5576 // extracellular region // traceable author statement	---
1604	142803_at	-0.508147	1.38116	-9.71544	5.47e-11	1.04e-09	14.8192	FBgn0032431	CG5435	CG5435	CG5435	34657	---	---	---	---
5933	147132_at	-0.67209	1.48996	-9.71134	5.53e-11	1.05e-09	14.8091	FBgn0033807 /// FBgn0011211	CG12251	AQP /// blw	aquaporin /// bellwether	36456 /// 37617	5372 // water transporter activity // non-traceable author statement /// 5515 // protein binding // inferred from physical interaction /// 166 // nucleotide binding // inferred from electronic annotation /// 5524 // ATP binding // inferred from electronic annotation /// 15078 // hydrogen ion transporter activity // inferred from electronic annotation /// 16787 // hydrolase activity // inferred fr…	6833 // water transport // non-traceable author statement /// 7286 // spermatid development // inferred from mutant phenotype /// 40007 // growth // inferred from mutant phenotype /// 6754 // ATP biosynthesis // inferred from electronic annotation /// 6810 // transport // inferred from electronic annotation /// 6811 // ion transport // inferred from electronic annotation /// 15986 // ATP synthesi…	5739 // mitochondrion // inferred from electronic annotation /// 16469 // proton-transporting two-sector ATPase complex // inferred from electronic annotation /// 45261 // proton-transporting ATP synthase complex, catalytic core F(1) // inferred from electronic annotation /// 16021 // integral to membrane // inferred from electronic annotation /// 19867 // outer membrane // inferred from electron…	IPR004100 // H+-transporting two-sector ATPase, alpha/beta subunit, N-terminal // 1.4E-25 /// IPR000194 // H+-transporting two-sector ATPase, alpha/beta subunit, central region // 3.2E-109 /// IPR000793 // H+-transporting two-sector ATPase, alpha/beta subunit, C-terminal // 1.1E-42
7344	148543_at	-0.909676	2.7901	-9.69965	5.69e-11	1.07e-09	14.7801	FBgn0052081	CG32081	CG32081	CG32081	326194	5279 // amino acid-polyamine transporter activity // inferred from electronic annotation /// 15171 // amino acid transporter activity // inferred from sequence or structural similarity /// 15171 // amino acid transporter activity // inferred from sequence similarity	6520 // amino acid metabolism // inferred from electronic annotation /// 6810 // transport // inferred from sequence or structural similarity /// 6865 // amino acid transport // inferred from electronic annotation /// 6810 // transport // inferred from sequence similarity	16020 // membrane // inferred from electronic annotation	IPR002422 // Amino acid/polyamine transporter II // 4.2E-52 /// IPR002422 // Amino acid/polyamine transporter II // 2.2E-44
84	141283_at	-0.75997	3.27751	-9.68443	5.91e-11	1.11e-09	14.7423	FBgn0000392	CG11181	cup	cup	33934	5515 // protein binding // inferred from physical interaction /// 45182 // translation regulator activity // inferred from direct assay	6445 // regulation of translation // inferred from direct assay /// 7001 // chromosome organization and biogenesis (sensu Eukaryota) // traceable author statement /// 7143 // female meiosis // inferred from genetic interaction /// 7297 // follicle cell migration (sensu Insecta) // inferred from mutant phenotype /// 7317 // regulation of pole plasm oskar mRNA localization // inferred from mutant p…	5641 // nuclear envelope lumen // inferred from direct assay /// 5737 // cytoplasm // inferred from direct assay /// 5886 // plasma membrane // inferred from sequence or structural similarity /// 5886 // plasma membrane // inferred from sequence similarity	---
5008	146207_at	-0.605656	0.101818	-9.68034	5.97e-11	1.12e-09	14.7322	FBgn0032315	CG14069	CG14069	CG14069	34510	---	---	---	---
3396	144595_at	-0.545816	4.33785	-9.67664	6.02e-11	1.13e-09	14.723	FBgn0029868	CG3446	CG3446	CG3446	31578	3954 // NADH dehydrogenase activity // inferred from sequence or structural similarity /// 3954 // NADH dehydrogenase activity // inferred from sequence similarity	6120 // mitochondrial electron transport, NADH to ubiquinone // inferred from sequence or structural similarity /// 6120 // mitochondrial electron transport, NADH to ubiquinone // inferred from sequence similarity	5747 // respiratory chain complex I (sensu Eukaryota) // inferred from sequence or structural similarity /// 5747 // respiratory chain complex I (sensu Eukaryota) // inferred from sequence similarity	IPR009346 // GRIM-19 // 1.2E-106
6014	147213_at	-0.611655	1.10878	-9.65971	6.28e-11	1.17e-09	14.6809	FBgn0033952	CG10143	Adgf-E	Adenosine deaminase-related growth factor E	36627	4000 // adenosine deaminase activity // non-traceable author statement /// 8083 // growth factor activity // inferred from sequence or structural similarity /// 8083 // growth factor activity // non-traceable author statement /// 19239 // deaminase activity // inferred from electronic annotation /// 8083 // growth factor activity // inferred from sequence similarity	9168 // purine ribonucleoside monophosphate biosynthesis // inferred from electronic annotation	5576 // extracellular region // inferred from sequence or structural similarity /// 5576 // extracellular region // inferred from sequence similarity	IPR001365 // Adenosine/AMP deaminase // 3.1E-82
225	141424_at	-0.978453	1.51013	-9.65712	6.32e-11	1.18e-09	14.6745	FBgn0035776	CG8564	CG8564	CG8564	38825	4181 // metallocarboxypeptidase activity // inferred from sequence or structural similarity /// 4182 // carboxypeptidase A activity // inferred from electronic annotation /// 4181 // metallocarboxypeptidase activity // inferred from sequence similarity	6508 // proteolysis // inferred from electronic annotation	---	IPR000834 // Peptidase M14, carboxypeptidase A // 2.4E-49
4416	145615_at	-0.674246	0.182672	-9.65501	6.35e-11	1.18e-09	14.6693	FBgn0031384	CG4238	CG4238	CG4238	33377	4842 // ubiquitin-protein ligase activity // inferred from sequence or structural similarity /// 4842 // ubiquitin-protein ligase activity // inferred from electronic annotation /// 4842 // ubiquitin-protein ligase activity // inferred from sequence similarity	6464 // protein modification // inferred from electronic annotation /// 6508 // proteolysis // inferred from electronic annotation /// 6512 // ubiquitin cycle // inferred from electronic annotation	5622 // intracellular // inferred from electronic annotation	IPR000569 // HECT domain (Ubiquitin-protein ligase) // 4.3E-60
2672	143871_at	-0.839846	4.56204	-9.65418	6.36e-11	1.18e-09	14.6672	FBgn0016120 /// FBgn0037222	CG6030	ATPsyn-d /// CG14642	ATP synthase, subunit d /// CG14642	40532 /// 42291	8553 // hydrogen-exporting ATPase activity, phosphorylative mechanism // inferred from sequence or structural similarity /// 8553 // hydrogen-exporting ATPase activity, phosphorylative mechanism // non-traceable author statement /// 46933 // hydrogen-transporting ATP synthase activity, rotational mechanism // inferred from electronic annotation /// 46961 // hydrogen-transporting ATPase activity, …	15986 // ATP synthesis coupled proton transport // inferred from electronic annotation /// 15992 // proton transport // inferred from sequence or structural similarity /// 6810 // transport // inferred from electronic annotation /// 6811 // ion transport // inferred from electronic annotation /// 15992 // proton transport // inferred from electronic annotation /// 6508 // proteolysis // inferred …	276 // proton-transporting ATP synthase complex, coupling factor F(o) (sensu Eukaryota) // inferred from sequence or structural similarity /// 5739 // mitochondrion // inferred from electronic annotation /// 16469 // proton-transporting two-sector ATPase complex // inferred from electronic annotation /// 45263 // proton-transporting ATP synthase complex, coupling factor F(o) // inferred from elec…	IPR008689 // ATP synthase D chain, mitochondrial // 2.8E-114 /// IPR001254 // Peptidase S1, chymotrypsin // 1.3E-19 /// IPR008689 // ATP synthase D chain, mitochondrial // 2.8E-114
3928	145127_s_at	-0.433034	1.17986	-9.64973	6.43e-11	1.19e-09	14.6561	FBgn0052584	CG32584	CG32584	CG32584	32487	5515 // protein binding // inferred from physical interaction	---	---	---
7895	149094_at	-0.603371	1.51541	-9.64376	6.53e-11	1.21e-09	14.6413	FBgn0036941	CG7335	CG7335	CG7335	40203	4454 // ketohexokinase activity // inferred from sequence or structural similarity /// 4454 // ketohexokinase activity // inferred from sequence similarity	5996 // monosaccharide metabolism // inferred from electronic annotation	---	IPR002173 // Carbohydrate kinase, PfkB // 4.1E-10 /// IPR002173 // Carbohydrate kinase, PfkB // 6.4E-5
3153	144352_at	-0.567483	-0.0454465	-9.63345	6.69e-11	1.24e-09	14.6156	FBgn0029535	CG14635	CG14635	CG14635	31032	---	---	---	---
5122	146321_at	-0.828175	1.70307	-9.62945	6.76e-11	1.25e-09	14.6057	FBgn0032492	CG5648	Pros6T	Pros6T	34726	4175 // endopeptidase activity // inferred from sequence or structural similarity /// 4175 // endopeptidase activity // non-traceable author statement /// 5515 // protein binding // inferred from physical interaction /// 4175 // endopeptidase activity // inferred from electronic annotation /// 4298 // threonine endopeptidase activity // inferred from electronic annotation /// 8233 // peptidase ac…	6508 // proteolysis // inferred from electronic annotation /// 6511 // ubiquitin-dependent protein catabolism // inferred from electronic annotation	5839 // proteasome core complex (sensu Eukaryota) // inferred from sequence or structural similarity /// 5839 // proteasome core complex (sensu Eukaryota) // non-traceable author statement /// 5829 // cytosol // inferred from electronic annotation /// 5839 // proteasome core complex (sensu Eukaryota) // inferred from electronic annotation /// 43234 // protein complex // inferred from electronic a…	IPR001353 // Peptidase T1, 20S proteasome // 3.3E-67
7773	148972_at	-0.476455	0.948927	-9.62586	6.82e-11	1.26e-09	14.5967	FBgn0036751	CG5998	Adgf-B	Adenosine deaminase-related growth factor B	39975	3735 // structural constituent of ribosome // inferred from electronic annotation /// 4000 // adenosine deaminase activity // non-traceable author statement /// 8083 // growth factor activity // non-traceable author statement /// 19239 // deaminase activity // inferred from electronic annotation	6412 // protein biosynthesis // inferred from electronic annotation /// 9168 // purine ribonucleoside monophosphate biosynthesis // inferred from electronic annotation	5622 // intracellular // inferred from electronic annotation /// 5840 // ribosome // inferred from electronic annotation	IPR001365 // Adenosine/AMP deaminase // 1.4E-88
10560	151759_s_at	-0.657763	2.18335	-9.62132	6.9e-11	1.27e-09	14.5854	FBgn0037811 /// FBgn0037810	CG12819 /// CG12592	CG12592 /// sle	CG12592 /// slender lobes	41262 /// 41263	---	7420 // brain development // non-traceable author statement	---	---
6733	147932_at	-0.721331	1.12267	-9.62054	6.91e-11	1.27e-09	14.5835	FBgn0035143	CG12169	CG12169	CG12169	38071	4722 // protein serine/threonine phosphatase activity // non-traceable author statement /// 287 // magnesium ion binding // inferred from electronic annotation /// 3824 // catalytic activity // inferred from electronic annotation /// 4721 // phosphoprotein phosphatase activity // inferred from electronic annotation /// 4722 // protein serine/threonine phosphatase activity // inferred from electro…	165 // MAPKKK cascade // inferred from electronic annotation /// 6470 // protein amino acid dephosphorylation // non-traceable author statement /// 6470 // protein amino acid dephosphorylation // inferred from electronic annotation	8287 // protein serine/threonine phosphatase complex // inferred from electronic annotation	IPR001932 // Protein phosphatase 2C-like // 2.2E-95
8121	149320_at	-0.471907	1.20051	-9.62023	6.92e-11	1.27e-09	14.5827	FBgn0037310	CG1158	Tim17b1	Tim17b1	40635	15450 // protein translocase activity // inferred from sequence or structural similarity /// 8565 // protein transporter activity // inferred from electronic annotation /// 15450 // protein translocase activity // inferred from sequence similarity	6626 // protein targeting to mitochondrion // inferred from sequence or structural similarity /// 15031 // protein transport // inferred from sequence or structural similarity /// 6605 // protein targeting // inferred from electronic annotation /// 6810 // transport // inferred from electronic annotation /// 15031 // protein transport // inferred from electronic annotation /// 6626 // protein tar…	5744 // mitochondrial inner membrane presequence translocase complex // inferred from sequence or structural similarity /// 5739 // mitochondrion // inferred from electronic annotation /// 5743 // mitochondrial inner membrane // inferred from electronic annotation /// 16020 // membrane // inferred from electronic annotation /// 16021 // integral to membrane // inferred from electronic annotation …	IPR003397 // Mitochondrial import inner membrane translocase, subunit Tim17/22 // 9.1E-59
8839	150038_at	-0.714596	1.258	-9.61087	7.08e-11	1.3e-09	14.5594	FBgn0038458	CG14909	CG14909	CG14909	42041	5215 // transporter activity // inferred from electronic annotation /// 8324 // cation transporter activity // inferred from electronic annotation /// 15078 // hydrogen ion transporter activity // inferred from electronic annotation /// 16787 // hydrolase activity // inferred from electronic annotation /// 16791 // phosphoric monoester hydrolase activity // inferred from electronic annotation ///…	6810 // transport // inferred from electronic annotation /// 6811 // ion transport // inferred from electronic annotation /// 6812 // cation transport // inferred from electronic annotation /// 15986 // ATP synthesis coupled proton transport // inferred from electronic annotation	16021 // integral to membrane // inferred from electronic annotation /// 16469 // proton-transporting two-sector ATPase complex // inferred from electronic annotation	IPR008389 // ATP synthase subunit H // 3.7E-37
11336	152535_at	-0.881531	1.89453	-9.59988	7.27e-11	1.33e-09	14.532	FBgn0032677	CG5790	CG5790	CG5790	35095	4674 // protein serine/threonine kinase activity // inferred from sequence or structural similarity /// 4702 // receptor signaling protein serine/threonine kinase activity // non-traceable author statement /// 5524 // ATP binding // inferred from electronic annotation /// 166 // nucleotide binding // inferred from electronic annotation /// 4672 // protein kinase activity // inferred from electron…	6468 // protein amino acid phosphorylation // non-traceable author statement /// 8360 // regulation of cell shape // inferred from mutant phenotype /// 6468 // protein amino acid phosphorylation // inferred from electronic annotation	---	IPR000719 // Protein kinase // 4.0E-21 /// IPR000719 // Protein kinase // 1.5E-13 /// IPR000719 // Protein kinase // 4.7E-11
8407	149606_at	-0.546925	2.32611	-9.59161	7.42e-11	1.36e-09	14.5114	FBgn0037777	CG11722	CG11722	CG11722	41227	5515 // protein binding // inferred from physical interaction	---	---	IPR009622 // Protein of unknown function UPF0240 // 1.0E-126
5941	147140_at	-1.01897	1.23919	-9.57967	7.64e-11	1.4e-09	14.4816	FBgn0033822	CG17041	CG17041	CG17041	36473	5515 // protein binding // inferred from physical interaction	---	---	---
12301	153500_at	-0.736045	2.27526	-9.57747	7.69e-11	1.4e-09	14.4761	FBgn0037655	CG11984	CG11984	CG11984	41082	3676 // nucleic acid binding // inferred from electronic annotation /// 8270 // zinc ion binding // inferred from electronic annotation /// 15459 // potassium channel regulator activity // inferred from sequence or structural similarity /// 15459 // potassium channel regulator activity // inferred from sequence similarity	---	5634 // nucleus // inferred from electronic annotation	IPR000433 // Zn-finger, ZZ type // 1.2E-12
9453	150652_at	-0.847804	0.4225	-9.55901	8.04e-11	1.46e-09	14.43	FBgn0051086	CG31086	CG31086	CG31086	43179	5515 // protein binding // inferred from physical interaction	---	---	---
2237	143436_at	-0.821731	4.64171	-9.55594	8.11e-11	1.47e-09	14.4223	FBgn0004175	CG17935	Mst84Dd	Male-specific RNA 84Dd	40886	5506 // iron ion binding // inferred from electronic annotation	6118 // electron transport // inferred from electronic annotation /// 7275 // development // inferred from electronic annotation /// 7283 // spermatogenesis // inferred from electronic annotation /// 30154 // cell differentiation // inferred from electronic annotation	---	IPR005634 // Male specific sperm protein // 3.4E-18
8681	149880_at	-0.641559	1.37786	-9.55545	8.12e-11	1.47e-09	14.4211	FBgn0038209	CG9722	CG9722	CG9722	41724	5102 // receptor binding // inferred from sequence or structural similarity /// 5515 // protein binding // inferred from physical interaction /// 5102 // receptor binding // inferred from sequence similarity	---	---	IPR006214 // Protein of unknown function UPF0005 // 2.7E-40
1137	142336_at	-0.949875	1.77225	-9.53323	8.57e-11	1.55e-09	14.3655	FBgn0037064	CG9389	CG9389	CG9389	40347	8934 // inositol-1(or 4)-monophosphatase activity // non-traceable author statement /// 4437 // inositol or phosphatidylinositol phosphatase activity // inferred from electronic annotation	6644 // phospholipid metabolism // inferred from electronic annotation /// 7242 // intracellular signaling cascade // inferred from electronic annotation /// 16311 // dephosphorylation // non-traceable author statement	---	IPR000760 // Inositol monophosphatase // 6.0E-102
11132	152331_at	-0.66648	2.52586	-9.52412	8.77e-11	1.58e-09	14.3427	FBgn0032229	CG5045	CG5045	CG5045	34402	8462 // endopeptidase Clp activity // inferred from sequence or structural similarity /// 4252 // serine-type endopeptidase activity // inferred from electronic annotation /// 8233 // peptidase activity // inferred from electronic annotation /// 8462 // endopeptidase Clp activity // inferred from electronic annotation /// 16787 // hydrolase activity // inferred from electronic annotation /// 8462…	6510 // ATP-dependent proteolysis // inferred from sequence or structural similarity /// 6508 // proteolysis // inferred from electronic annotation /// 6510 // ATP-dependent proteolysis // inferred from sequence similarity	5739 // mitochondrion // inferred from sequence or structural similarity /// 5739 // mitochondrion // inferred from sequence similarity	IPR001907 // Peptidase S14, ClpP // 2.0E-123
4987	146186_at	-1.07287	0.762276	-9.516	8.95e-11	1.61e-09	14.3224	FBgn0032291	CG17118	CG17118	CG17118	34478	3700 // transcription factor activity // inferred from sequence or structural similarity /// 3700 // transcription factor activity // inferred from sequence similarity	---	5634 // nucleus // inferred from sequence or structural similarity /// 5634 // nucleus // inferred from sequence similarity	IPR007714 // Protein of unknown function DUF667 // 1.0E-126
11386	152585_at	-0.530955	2.25077	-9.51377	9e-11	1.61e-09	14.3168	FBgn0035034	CG3565	CG3565	CG3565	37933	5509 // calcium ion binding // inferred from electronic annotation /// 5516 // calmodulin binding // inferred from electronic annotation	7165 // signal transduction // inferred from electronic annotation /// 7242 // intracellular signaling cascade // inferred from electronic annotation	---	---
4451	145650_at	-0.801283	3.12084	-9.50684	9.15e-11	1.64e-09	14.2994	FBgn0031436	CG3214	CG3214	CG3214	33443	3954 // NADH dehydrogenase activity // inferred from sequence or structural similarity /// 8137 // NADH dehydrogenase (ubiquinone) activity // inferred from sequence or structural similarity /// 8137 // NADH dehydrogenase (ubiquinone) activity // inferred from electronic annotation /// 3954 // NADH dehydrogenase activity // inferred from sequence similarity /// 8137 // NADH dehydrogenase (ubiquin…	6120 // mitochondrial electron transport, NADH to ubiquinone // inferred from sequence or structural similarity /// 6118 // electron transport // inferred from electronic annotation /// 6120 // mitochondrial electron transport, NADH to ubiquinone // inferred from sequence similarity	5747 // respiratory chain complex I (sensu Eukaryota) // inferred from sequence or structural similarity /// 16020 // membrane // inferred from electronic annotation /// 5747 // respiratory chain complex I (sensu Eukaryota) // inferred from sequence similarity	IPR007763 // NADH:ubiquinone oxidoreductase 17.2 kD subunit // 7.9E-58 /// IPR007763 // NADH:ubiquinone oxidoreductase 17.2 kD subunit // 7.9E-58
8436	149635_at	-0.731928	1.49581	-9.50271	9.25e-11	1.65e-09	14.2891	FBgn0051391	CG31391	CG31391	CG31391	41280	---	---	---	---
7982	149181_at	-0.720602	1.88822	-9.49642	9.39e-11	1.68e-09	14.2733	FBgn0037086	CG7202	CG7202	CG7202	40376	---	---	---	---
2234	143433_at	-0.977794	5.30612	-9.46534	1.01e-10	1.8e-09	14.1953	FBgn0004172	CG17946	Mst84Da	Male-specific RNA 84Da	40889	5506 // iron ion binding // inferred from electronic annotation	6118 // electron transport // inferred from electronic annotation	---	IPR005634 // Male specific sperm protein // 7.1E-12
11260	152459_at	-0.658924	1.65374	-9.45649	1.04e-10	1.84e-09	14.1731	FBgn0052262	CG32262	CG32262	CG32262	38445	5057 // receptor signaling protein activity // inferred from electronic annotation	---	5778 // peroxisomal membrane // inferred from sequence or structural similarity /// 16021 // integral to membrane // inferred from electronic annotation /// 5778 // peroxisomal membrane // inferred from sequence similarity	IPR007248 // Mpv17/PMP22 // 9.1E-6
5774	146973_at	-0.903879	3.2487	-9.44898	1.06e-10	1.87e-09	14.1543	FBgn0033570	CG7712	CG7712	CG7712	36159	3954 // NADH dehydrogenase activity // inferred from sequence or structural similarity /// 8137 // NADH dehydrogenase (ubiquinone) activity // inferred from sequence or structural similarity /// 5515 // protein binding // inferred from physical interaction /// 3954 // NADH dehydrogenase activity // inferred from sequence similarity /// 8137 // NADH dehydrogenase (ubiquinone) activity // inferred …	6120 // mitochondrial electron transport, NADH to ubiquinone // inferred from sequence or structural similarity /// 6120 // mitochondrial electron transport, NADH to ubiquinone // inferred from sequence similarity	5747 // respiratory chain complex I (sensu Eukaryota) // inferred from sequence or structural similarity /// 5747 // respiratory chain complex I (sensu Eukaryota) // inferred from sequence similarity	IPR008011 // Complex 1 LYR protein // 7.7E-28
5358	146557_at	-0.981271	1.41619	-9.44259	1.07e-10	1.9e-09	14.1382	FBgn0032894	CG14402	CG14402	CG14402	35352	---	---	---	---
11416	152615_at	-0.504476	2.10666	-9.43801	1.09e-10	1.91e-09	14.1267	FBgn0033426	CG1814	CG1814	CG1814	35984	16791 // phosphoric monoester hydrolase activity // inferred from electronic annotation /// 19204 // nucleotide phosphatase activity // inferred from electronic annotation /// 5515 // protein binding // inferred from physical interaction	6139 // nucleobase, nucleoside, nucleotide and nucleic acid metabolism // inferred from electronic annotation /// 6144 // purine base metabolism // inferred from electronic annotation	---	IPR008380 // Purine 5-nucleotidase // 1.0E-126 /// IPR008380 // Purine 5-nucleotidase // 1.0E-126 /// IPR008380 // Purine 5-nucleotidase // 1.0E-126
10924	152123_at	-0.551949	2.47716	-9.43394	1.1e-10	1.93e-09	14.1164	FBgn0038321	CG6218	CG6218	CG6218	41863	16301 // kinase activity // inferred from electronic annotation /// 19200 // carbohydrate kinase activity // inferred from electronic annotation /// 5515 // protein binding // inferred from physical interaction	5975 // carbohydrate metabolism // inferred from electronic annotation /// 5996 // monosaccharide metabolism // inferred from electronic annotation	---	IPR002731 // ATPase, BadF/BadG/BcrA/BcrD type // 1.4E-36
11437	152636_at	-0.781085	4.99707	-9.43324	1.1e-10	1.93e-09	14.1147	FBgn0031066 /// FBgn0042132	CG14235	CG14235 /// CG18809	CG14235 /// CG18809	32989 /// 59170	4129 // cytochrome-c oxidase activity // inferred from sequence or structural similarity /// 4129 // cytochrome-c oxidase activity // inferred from sequence similarity	6118 // electron transport // inferred from electronic annotation /// 6119 // oxidative phosphorylation // inferred from electronic annotation /// 6123 // mitochondrial electron transport, cytochrome c to oxygen // inferred from sequence or structural similarity /// 6123 // mitochondrial electron transport, cytochrome c to oxygen // inferred from sequence similarity	5751 // respiratory chain complex IV (sensu Eukaryota) // inferred from sequence or structural similarity /// 5751 // respiratory chain complex IV (sensu Eukaryota) // inferred from sequence similarity	IPR003213 // Cytochrome oxidase c, subunit VIb // 2.6E-42 /// IPR003213 // Cytochrome oxidase c, subunit VIb // 2.6E-42
6665	147864_at	-0.679685	1.83471	-9.43155	1.1e-10	1.94e-09	14.1104	FBgn0035014	CG13581	CG13581	CG13581	37911	5515 // protein binding // inferred from physical interaction	---	---	---
3031	144230_at	-0.80907	1.62748	-9.42811	1.11e-10	1.95e-09	14.1018	FBgn0028531	CG15286	CG15286	CG15286	34834	3676 // nucleic acid binding // inferred from electronic annotation /// 8270 // zinc ion binding // inferred from electronic annotation	---	5634 // nucleus // inferred from electronic annotation	---
8375	149574_at	-0.939806	1.74827	-9.42496	1.12e-10	1.96e-09	14.0938	FBgn0028997	CG8362	nmdyn-D7	nmdyn-D7	41174	4550 // nucleoside diphosphate kinase activity // inferred from sequence or structural similarity /// 5524 // ATP binding // inferred from electronic annotation /// 4550 // nucleoside diphosphate kinase activity // inferred from electronic annotation /// 4550 // nucleoside diphosphate kinase activity // inferred from sequence similarity	6183 // GTP biosynthesis // inferred from electronic annotation /// 6228 // UTP biosynthesis // inferred from electronic annotation /// 6241 // CTP biosynthesis // inferred from electronic annotation	---	IPR001564 // Nucleoside diphosphate kinase // 5.0E-5 /// IPR001564 // Nucleoside diphosphate kinase // 5.0E-5
8790	149989_at	-0.47708	0.812698	-9.425	1.12e-10	1.96e-09	14.094	FBgn0038386	CG5478	CG5478	CG5478	41936	5515 // protein binding // inferred from physical interaction	---	---	---
8624	149823_at	-0.7188	1.35166	-9.40744	1.17e-10	2.04e-09	14.0497	FBgn0038122	CG8138	CG8138	CG8138	41619	---	---	---	---
12624	153823_at	-0.732071	3.00642	-9.40639	1.17e-10	2.04e-09	14.0471	FBgn0033377	CG8073	Pmm45A	Phosphomannomutase 45A	35923	4615 // phosphomannomutase activity // inferred from sequence or structural similarity /// 4615 // phosphomannomutase activity // non-traceable author statement /// 16868 // intramolecular transferase activity, phosphotransferases // inferred from electronic annotation /// 4615 // phosphomannomutase activity // inferred from sequence similarity	5996 // monosaccharide metabolism // inferred from electronic annotation /// 5975 // carbohydrate metabolism // inferred from electronic annotation	---	IPR005844 // Phosphoglucomutase/phosphomannomutase alpha/beta/alpha domain I // 2.6E-48 /// IPR005844 // Phosphoglucomutase/phosphomannomutase alpha/beta/alpha domain I // 2.6E-48
9705	150904_at	-0.911595	2.96386	-9.40427	1.18e-10	2.05e-09	14.0418	FBgn0039792	CG2267	CG2267	CG2267	43639	---	---	---	---
11760	152959_at	-0.751233	1.57752	-9.4021	1.19e-10	2.06e-09	14.0363	FBgn0030933	CG6470	CG6470	CG6470	32840	3676 // nucleic acid binding // inferred from electronic annotation /// 8270 // zinc ion binding // inferred from electronic annotation /// 5515 // protein binding // inferred from physical interaction /// 46872 // metal ion binding // inferred from electronic annotation	---	5634 // nucleus // inferred from electronic annotation	---
11564	152763_at	-0.39445	0.595949	-9.39343	1.21e-10	2.1e-09	14.0144	FBgn0037512	CG2616	CG2616	CG2616	40915	5386 // carrier activity // inferred from sequence or structural similarity /// 5488 // binding // inferred from electronic annotation /// 5386 // carrier activity // inferred from sequence similarity	6810 // transport // inferred from electronic annotation	5739 // mitochondrion // inferred from sequence or structural similarity /// 5740 // mitochondrial envelope // inferred from sequence or structural similarity /// 16020 // membrane // inferred from electronic annotation /// 16021 // integral to membrane // inferred from electronic annotation /// 5739 // mitochondrion // inferred from sequence similarity /// 5740 // mitochondrial envelope // infer…	IPR001993 // Mitochondrial substrate carrier // 2.0E-27 /// IPR001993 // Mitochondrial substrate carrier // 5.7E-27 /// IPR001993 // Mitochondrial substrate carrier // 7.5E-26
3734	144933_at	-0.629359	2.02904	-9.39094	1.22e-10	2.11e-09	14.0081	FBgn0030386	CG2574	CG2574	CG2574	32190	4840 // ubiquitin conjugating enzyme activity // inferred from sequence or structural similarity /// 16874 // ligase activity // inferred from electronic annotation /// 4842 // ubiquitin-protein ligase activity // inferred from electronic annotation /// 4840 // ubiquitin conjugating enzyme activity // inferred from sequence similarity	6464 // protein modification // inferred from electronic annotation /// 6512 // ubiquitin cycle // inferred from electronic annotation /// 19538 // protein metabolism // inferred from electronic annotation	---	IPR000608 // Ubiquitin-conjugating enzymes // 6.1E-70
293	141492_at	-0.545616	1.56506	-9.37597	1.27e-10	2.18e-09	13.9704	FBgn0030242	CG1655	sofe	sister of feo	32016	155 // two-component sensor activity // inferred from electronic annotation /// 5102 // receptor binding // inferred from electronic annotation /// 4871 // signal transducer activity // inferred from electronic annotation	160 // two-component signal transduction system (phosphorelay) // inferred from electronic annotation /// 910 // cytokinesis // inferred from electronic annotation /// 7049 // cell cycle // inferred from electronic annotation /// 7067 // mitosis // inferred from electronic annotation /// 7186 // G-protein coupled receptor protein signaling pathway // inferred from electronic annotation	5834 // heterotrimeric G-protein complex // inferred from electronic annotation	IPR007145 // MAP65/ASE1 // 1.0E-126
10225	151424_at	-1.18448	2.74742	-9.37629	1.27e-10	2.18e-09	13.9712	FBgn0040963	CG18662	CG18662	CG18662	50437	---	---	---	IPR007702 // Janus/Ocnus // 9.8E-68 /// IPR007702 // Janus/Ocnus // 9.8E-68
12593	153792_at	-0.625476	2.05205	-9.37664	1.27e-10	2.18e-09	13.9721	FBgn0040493	CG7340	granny-smith	granny smith	41587	4177 // aminopeptidase activity // inferred from sequence or structural similarity /// 4178 // leucyl aminopeptidase activity // inferred from sequence or structural similarity /// 30145 // manganese ion binding // inferred from electronic annotation /// 4177 // aminopeptidase activity // inferred from electronic annotation /// 4178 // leucyl aminopeptidase activity // inferred from electronic an…	6508 // proteolysis // inferred from electronic annotation /// 19538 // protein metabolism // inferred from electronic annotation	5737 // cytoplasm // inferred from sequence or structural similarity /// 5622 // intracellular // inferred from electronic annotation /// 5737 // cytoplasm // inferred from electronic annotation /// 5737 // cytoplasm // inferred from sequence similarity	IPR000819 // Peptidase M17, cytosol aminopeptidase, C-terminal // 2.4E-111 /// IPR000819 // Peptidase M17, cytosol aminopeptidase, C-terminal // 2.4E-111 /// IPR000819 // Peptidase M17, cytosol aminopeptidase, C-terminal // 2.4E-111
2027	143226_at	-0.562506	1.64624	-9.36732	1.3e-10	2.22e-09	13.9486	FBgn0002354	CG7620	l(3)87Df	lethal (3) 87Df	49762	5515 // protein binding // inferred from electronic annotation	---	---	IPR000210 // BTB/POZ domain // 5.6E-24
1463	142662_at	-0.684081	0.773492	-9.35285	1.34e-10	2.3e-09	13.912	FBgn0038613	CG7678	CG7678	CG7678	42214	8553 // hydrogen-exporting ATPase activity, phosphorylative mechanism // inferred from sequence or structural similarity /// 8553 // hydrogen-exporting ATPase activity, phosphorylative mechanism // inferred from sequence similarity	6812 // cation transport // inferred from electronic annotation /// 15992 // proton transport // inferred from electronic annotation	220 // hydrogen-transporting ATPase V0 domain // inferred from sequence or structural similarity /// 16020 // membrane // inferred from electronic annotation /// 220 // hydrogen-transporting ATPase V0 domain // inferred from sequence similarity	IPR002490 // V-type ATPase, 116 kDa subunit // 1.0E-126
11773	152972_at	-0.540406	1.04985	-9.35251	1.34e-10	2.3e-09	13.9112	FBgn0033431	CG1827	CG1827	CG1827	35989	3948 // N4-(beta-N-acetylglucosaminyl)-L-asparaginase activity // inferred from sequence or structural similarity /// 4067 // asparaginase activity // inferred from electronic annotation /// 3948 // N4-(beta-N-acetylglucosaminyl)-L-asparaginase activity // inferred from sequence similarity	6516 // glycoprotein catabolism // inferred from electronic annotation /// 9063 // amino acid catabolism // inferred from electronic annotation	---	IPR000246 // Peptidase T2, asparaginase 2 // 1.0E-126 /// IPR000246 // Peptidase T2, asparaginase 2 // 1.0E-126
2921	144120_at	-0.787739	2.14547	-9.35051	1.35e-10	2.3e-09	13.9061	FBgn0026136	CG8914	CkII2	Casein kinase II 2 subunit	37300	4672 // protein kinase activity // non-traceable author statement /// 4702 // receptor signaling protein serine/threonine kinase activity // inferred from electronic annotation /// 8605 // protein kinase CK2 regulator activity // inferred from sequence or structural similarity /// 8605 // protein kinase CK2 regulator activity // non-traceable author statement /// 16301 // kinase activity // infer…	6464 // protein modification // inferred from electronic annotation /// 6468 // protein amino acid phosphorylation // inferred from sequence or structural similarity /// 6468 // protein amino acid phosphorylation // non-traceable author statement /// 7165 // signal transduction // inferred from electronic annotation /// 19538 // protein metabolism // inferred from electronic annotation /// 16055 …	5956 // protein kinase CK2 complex // inferred from sequence or structural similarity /// 5956 // protein kinase CK2 complex // non-traceable author statement /// 5956 // protein kinase CK2 complex // inferred from electronic annotation /// 5956 // protein kinase CK2 complex // inferred from sequence similarity	IPR000704 // Casein kinase II, regulatory subunit // 2.7E-102
10977	152176_at	-1.67875	5.09252	-9.34094	1.38e-10	2.36e-09	13.882	FBgn0040060	CG6457	yip7	yippee interacting protein 7	38680	4252 // serine-type endopeptidase activity // inferred from sequence or structural similarity /// 4263 // chymotrypsin activity // non-traceable author statement /// 4295 // trypsin activity // inferred from electronic annotation /// 4252 // serine-type endopeptidase activity // inferred from electronic annotation /// 8233 // peptidase activity // inferred from electronic annotation /// 16787 // …	6508 // proteolysis // non-traceable author statement /// 6508 // proteolysis // inferred from electronic annotation	---	IPR001254 // Peptidase S1, chymotrypsin // 1.4E-69
11743	152942_at	-0.85928	2.64318	-9.3338	1.41e-10	2.39e-09	13.8639	FBgn0033900	CG8257	CG8257	CG8257	36563	3729 // mRNA binding // inferred from electronic annotation /// 4817 // cysteine-tRNA ligase activity // inferred from sequence or structural similarity /// 5524 // ATP binding // inferred from electronic annotation /// 4817 // cysteine-tRNA ligase activity // inferred from electronic annotation /// 4817 // cysteine-tRNA ligase activity // inferred from sequence similarity	6423 // cysteinyl-tRNA aminoacylation // inferred from electronic annotation /// 19538 // protein metabolism // inferred from electronic annotation	---	IPR002308 // Cysteinyl-tRNA synthetase, class Ia // 8.0E-117
220	141419_at	-0.772386	1.13862	-9.32117	1.45e-10	2.46e-09	13.832	FBgn0038845	CG10827	CG10827	CG10827	42482	4035 // alkaline phosphatase activity // inferred from sequence or structural similarity /// 19204 // nucleotide phosphatase activity // inferred from electronic annotation /// 287 // magnesium ion binding // inferred from electronic annotation /// 8270 // zinc ion binding // inferred from electronic annotation /// 16787 // hydrolase activity // inferred from electronic annotation /// 4035 // alk…	1501 // skeletal development // inferred from electronic annotation /// 7498 // mesoderm development // inferred from electronic annotation /// 8152 // metabolism // inferred from electronic annotation	---	IPR001952 // Alkaline phosphatase // 2.2E-93
6613	147812_at	-0.571521	1.33879	-9.31416	1.48e-10	2.5e-09	13.8142	FBgn0034919	CG5569	CG5569	CG5569	37783	5515 // protein binding // inferred from physical interaction	---	---	IPR006729 // Protein of unknown function DUF598 // 8.4E-72
1176	142375_at	-1.02064	2.07099	-9.28381	1.6e-10	2.69e-09	13.7373	FBgn0032072	CG9483	CG9483	CG9483	34209	---	---	---	---
207	141406_at	-1.17021	1.97497	-9.2787	1.62e-10	2.72e-09	13.7244	FBgn0037684	CG8129	CG8129	CG8129	41117	257 // nitrilase activity // inferred from electronic annotation /// 4794 // threonine ammonia-lyase activity // inferred from sequence or structural similarity /// 16597 // amino acid binding // inferred from electronic annotation /// 16836 // hydro-lyase activity // inferred from electronic annotation /// 5515 // protein binding // inferred from physical interaction /// 42802 // identical prote…	8652 // amino acid biosynthesis // inferred from electronic annotation /// 9063 // amino acid catabolism // inferred from electronic annotation /// 8152 // metabolism // inferred from electronic annotation	---	IPR002912 // Amino acid-binding ACT // 4.3E-6 /// IPR001926 // Pyridoxal-5-phosphate-dependent enzyme, beta subunit // 3.5E-74 /// IPR002912 // Amino acid-binding ACT // 4.3E-6 /// IPR001926 // Pyridoxal-5-phosphate-dependent enzyme, beta subunit // 9.4E-49
4379	145578_at	-0.627095	3.04778	-9.27016	1.65e-10	2.77e-09	13.7027	FBgn0031335	CG5565	CG5565	CG5565	33323	3824 // catalytic activity // inferred from electronic annotation	8152 // metabolism // inferred from electronic annotation	---	IPR005834 // Haloacid dehalogenase-like hydrolase // 5.3E-27
10981	152180_at	-0.68831	1.35732	-9.26151	1.69e-10	2.83e-09	13.6808	FBgn0038607	CG7669	CG7669	CG7669	42207	---	---	---	---
8244	149443_at	-0.93552	2.43386	-9.25688	1.71e-10	2.86e-09	13.669	FBgn0037500	CG17944	CG17944	CG17944	40885	---	---	---	---
10324	151523_s_at	-0.721196	1.74615	-9.25009	1.74e-10	2.9e-09	13.6518	FBgn0053092	CG33092	CG33092	CG33092	326250	3842 // 1-pyrroline-5-carboxylate dehydrogenase activity // inferred from sequence or structural similarity /// 3842 // 1-pyrroline-5-carboxylate dehydrogenase activity // inferred from electronic annotation /// 16491 // oxidoreductase activity // inferred from electronic annotation /// 3842 // 1-pyrroline-5-carboxylate dehydrogenase activity // inferred from sequence similarity	6537 // glutamate biosynthesis // inferred from sequence or structural similarity /// 6562 // proline catabolism // inferred from sequence or structural similarity /// 6561 // proline biosynthesis // inferred from electronic annotation /// 8152 // metabolism // inferred from electronic annotation /// 6537 // glutamate biosynthesis // inferred from sequence similarity /// 6562 // proline catabolis…	5759 // mitochondrial matrix // inferred from sequence or structural similarity /// 5759 // mitochondrial matrix // inferred from electronic annotation /// 5759 // mitochondrial matrix // inferred from sequence similarity	IPR002086 // Aldehyde dehydrogenase // 4.3E-8 /// IPR002086 // Aldehyde dehydrogenase // 1.5E-31 /// IPR002086 // Aldehyde dehydrogenase // 1.7E-9 /// IPR002086 // Aldehyde dehydrogenase // 4.3E-8 /// IPR002086 // Aldehyde dehydrogenase // 1.5E-31 /// IPR002086 // Aldehyde dehydrogenase // 1.7E-9 /// IPR002086 // Aldehyde dehydrogenase // 4.3E-8 /// IPR002086 // Aldehyde dehydrogenase // 1.5E-31 …
1010	142209_at	-0.931112	1.89031	-9.24779	1.75e-10	2.91e-09	13.646	---	CG11714 /// CG6128	---	---	---	4560 // alpha-L-fucosidase activity // inferred from sequence or structural similarity /// 5515 // protein binding // inferred from physical interaction /// 4560 // alpha-L-fucosidase activity // inferred from electronic annotation /// 16787 // hydrolase activity // inferred from electronic annotation /// 16798 // hydrolase activity, acting on glycosyl bonds // inferred from electronic annotation…	6004 // fucose metabolism // inferred from sequence or structural similarity /// 16142 // O-glycoside catabolism // inferred from sequence or structural similarity /// 5975 // carbohydrate metabolism // inferred from electronic annotation /// 6027 // glycosaminoglycan catabolism // non-traceable author statement	---	---
8987	150186_at	-1.14578	1.72914	-9.2467	1.75e-10	2.92e-09	13.6432	FBgn0038694	CG5217	CG5217	CG5217	42311	---	---	---	---
6721	147920_at	-1.13966	2.40301	-9.24196	1.77e-10	2.95e-09	13.6311	FBgn0035124	CG12313	CG12313	CG12313	38049	5515 // protein binding // inferred from physical interaction /// 4722 // protein serine/threonine phosphatase activity // inferred from sequence or structural similarity /// 4725 // protein tyrosine phosphatase activity // inferred from sequence or structural similarity /// 5515 // protein binding // inferred from sequence or structural similarity /// 43021 // ribonucleoprotein binding // inferr…	6470 // protein amino acid dephosphorylation // inferred from sequence or structural similarity /// 7006 // mitochondrial membrane organization and biogenesis // inferred from sequence or structural similarity /// 6605 // protein targeting // inferred from electronic annotation /// 6810 // transport // inferred from electronic annotation /// 15031 // protein transport // inferred from electronic …	5743 // mitochondrial inner membrane // inferred from sequence or structural similarity /// 5744 // mitochondrial inner membrane presequence translocase complex // inferred from sequence or structural similarity /// 16607 // nuclear speck // inferred from sequence or structural similarity /// 5739 // mitochondrion // inferred from electronic annotation /// 16020 // membrane // inferred from elect…	IPR004274 // NLI interacting factor // 2.4E-25 /// IPR004274 // NLI interacting factor // 3.4E-16
10373	151572_r_at	-1.3028	4.07736	-9.22209	1.86e-10	3.09e-09	13.5806	FBgn0001122	CG2204	G-o47A	G protein o 47A	36104	3924 // GTPase activity // inferred from sequence or structural similarity /// 3924 // GTPase activity // non-traceable author statement /// 4871 // signal transducer activity // inferred from electronic annotation /// 5525 // GTP binding // inferred from electronic annotation /// 5515 // protein binding // inferred from physical interaction /// 166 // nucleotide binding // inferred from electron…	1737 // establishment of wing hair orientation // inferred from mutant phenotype /// 7186 // G-protein coupled receptor protein signaling pathway // inferred from sequence or structural similarity /// 7186 // G-protein coupled receptor protein signaling pathway // non-traceable author statement /// 7507 // heart development // traceable author statement /// 16055 // Wnt receptor signaling pathway…	5834 // heterotrimeric G-protein complex // inferred from sequence or structural similarity /// 5834 // heterotrimeric G-protein complex // non-traceable author statement /// 5834 // heterotrimeric G-protein complex // inferred from sequence similarity	IPR001019 // Guanine nucleotide binding protein (G-protein), alpha subunit // 1.0E-126 /// IPR001019 // Guanine nucleotide binding protein (G-protein), alpha subunit // 1.2E-62 /// IPR001019 // Guanine nucleotide binding protein (G-protein), alpha subunit // 1.0E-126
4003	145202_at	-1.00163	1.63979	-9.22056	1.87e-10	3.1e-09	13.5767	FBgn0030775	CG9673	CG9673	CG9673	32649	4252 // serine-type endopeptidase activity // non-traceable author statement /// 4263 // chymotrypsin activity // inferred from electronic annotation /// 4295 // trypsin activity // inferred from electronic annotation /// 4252 // serine-type endopeptidase activity // inferred from electronic annotation	6508 // proteolysis // inferred from electronic annotation	---	IPR001254 // Peptidase S1, chymotrypsin // 1.5E-54
11761	152960_i_at	-0.984123	4.3733	-9.2138	1.9e-10	3.14e-09	13.5595	FBgn0037888	CG17210	scpr-B	SCP-containing protein B	41357	5515 // protein binding // inferred from physical interaction	---	5576 // extracellular region // inferred from electronic annotation	IPR001283 // Allergen V5/Tpx-1 related // 1.3E-27
7765	148964_at	-1.85498	1.93004	-9.20706	1.94e-10	3.19e-09	13.5424	FBgn0036738	CG7542	CG7542	CG7542	39960	4263 // chymotrypsin activity // inferred from sequence or structural similarity /// 4263 // chymotrypsin activity // non-traceable author statement /// 4295 // trypsin activity // inferred from electronic annotation /// 5515 // protein binding // inferred from physical interaction /// 4252 // serine-type endopeptidase activity // inferred from electronic annotation /// 8233 // peptidase activity…	6508 // proteolysis // non-traceable author statement /// 6508 // proteolysis // inferred from electronic annotation	---	IPR001254 // Peptidase S1, chymotrypsin // 2.8E-71
12127	153326_at	-0.635352	4.23813	-9.20582	1.94e-10	3.2e-09	13.5393	FBgn0031771	CG9140	CG9140	CG9140	33852	3954 // NADH dehydrogenase activity // inferred from sequence or structural similarity /// 8137 // NADH dehydrogenase (ubiquinone) activity // inferred from sequence or structural similarity /// 5506 // iron ion binding // inferred from electronic annotation /// 10181 // FMN binding // inferred from electronic annotation /// 16651 // oxidoreductase activity, acting on NADH or NADPH // inferred fr…	6120 // mitochondrial electron transport, NADH to ubiquinone // inferred from sequence or structural similarity /// 6118 // electron transport // inferred from electronic annotation /// 6120 // mitochondrial electron transport, NADH to ubiquinone // inferred from electronic annotation /// 6120 // mitochondrial electron transport, NADH to ubiquinone // inferred from sequence similarity	5747 // respiratory chain complex I (sensu Eukaryota) // inferred from sequence or structural similarity /// 5747 // respiratory chain complex I (sensu Eukaryota) // inferred from sequence similarity	IPR001949 // Respiratory-chain NADH dehydrogenase, 51 kDa subunit // 1.0E-126
8212	149411_at	-0.936282	2.75608	-9.17599	2.09e-10	3.43e-09	13.4633	FBgn0051482	CG31482	CG31482	CG31482	40806	---	---	5576 // extracellular region // inferred from electronic annotation	IPR001283 // Allergen V5/Tpx-1 related // 6.8E-30
1751	142950_at	-1.44241	2.6682	-9.16909	2.13e-10	3.49e-09	13.4457	FBgn0028533	CG7953	CG7953	CG7953	34801	---	---	---	---
6568	147767_at	-0.92051	1.34718	-9.16946	2.13e-10	3.49e-09	13.4466	FBgn0034850	CG9875	CG9875	CG9875	37698	30272 // 5-formyltetrahydrofolate cyclo-ligase activity // inferred from sequence or structural similarity /// 5515 // protein binding // inferred from physical interaction /// 30272 // 5-formyltetrahydrofolate cyclo-ligase activity // inferred from sequence similarity	8152 // metabolism // inferred from electronic annotation	---	---
9396	150595_at	-1.38988	3.544	-9.13015	2.35e-10	3.83e-09	13.3463	FBgn0039345	CG12250	CG12250	CG12250	43088	---	---	---	---
7323	148522_at	-1.08211	2.29657	-9.12921	2.36e-10	3.83e-09	13.3439	FBgn0036085	CG6527	CG6527	CG6527	39197	5198 // structural molecule activity // inferred from electronic annotation	---	---	IPR000535 // Major sperm protein (MSP) domain // 1.1E-29
5629	146828_at	-0.579857	0.980736	-9.1273	2.37e-10	3.84e-09	13.339	FBgn0033322	CG8584	CG8584	CG8584	35856	5515 // protein binding // inferred from physical interaction /// 16791 // phosphoric monoester hydrolase activity // inferred from electronic annotation	7275 // development // inferred from electronic annotation /// 7398 // ectoderm development // inferred from electronic annotation /// 7399 // nervous system development // inferred from electronic annotation	---	IPR004274 // NLI interacting factor // 1.3E-115
8216	149415_at	-1.05596	1.68542	-9.1272	2.37e-10	3.84e-09	13.3387	FBgn0037461	CG15177	CG15177	CG15177	40810	5509 // calcium ion binding // inferred from electronic annotation /// 5516 // calmodulin binding // inferred from electronic annotation	7165 // signal transduction // inferred from electronic annotation /// 7242 // intracellular signaling cascade // inferred from electronic annotation	---	IPR002048 // Calcium-binding EF-hand // 0.0018 /// IPR002048 // Calcium-binding EF-hand // 1.5E-5
8914	150113_at	-0.733521	1.96845	-9.12089	2.41e-10	3.9e-09	13.3226	FBgn0038565	CG7794	CG7794	CG7794	42159	3924 // GTPase activity // inferred from electronic annotation /// 5200 // structural constituent of cytoskeleton // inferred from sequence or structural similarity /// 5525 // GTP binding // inferred from electronic annotation /// 15631 // tubulin binding // inferred from electronic annotation /// 166 // nucleotide binding // inferred from electronic annotation /// 5198 // structural molecule ac…	6886 // intracellular protein transport // inferred from electronic annotation /// 6928 // cell motility // inferred from electronic annotation /// 7010 // cytoskeleton organization and biogenesis // inferred from electronic annotation /// 7018 // microtubule-based movement // inferred from electronic annotation /// 7059 // chromosome segregation // inferred from electronic annotation /// 7067 //…	5874 // microtubule // inferred from sequence or structural similarity /// 45298 // tubulin // inferred from electronic annotation /// 5874 // microtubule // inferred from electronic annotation /// 43234 // protein complex // inferred from electronic annotation /// 5874 // microtubule // inferred from sequence similarity	IPR003008 // Tubulin/FtsZ, GTPase // 2.4E-75 /// IPR008280 // Tubulin/FtsZ, C-terminal // 1.0E-57
111	141310_at	-1.17881	1.72116	-9.11896	2.42e-10	3.91e-09	13.3177	FBgn0039760	CG9682	CG9682	CG9682	43602	---	---	---	IPR004238 // Late embryogenesis abundant protein // 7.1E-9 /// IPR004238 // Late embryogenesis abundant protein // 2.1E-10
2236	143435_at	-1.09782	5.36811	-9.10864	2.48e-10	4e-09	13.2913	FBgn0004174	CG17945	Mst84Dc	Male-specific RNA 84Dc	40887	5506 // iron ion binding // inferred from electronic annotation	6118 // electron transport // inferred from electronic annotation	---	IPR005634 // Male specific sperm protein // 1.8E-4
11368	152567_at	-0.787022	1.55536	-9.10476	2.51e-10	4.03e-09	13.2814	FBgn0031929	CG18585	CG18585	CG18585	34041	4180 // carboxypeptidase activity // inferred from electronic annotation /// 4182 // carboxypeptidase A activity // inferred from electronic annotation /// 8233 // peptidase activity // inferred from electronic annotation /// 8237 // metallopeptidase activity // inferred from electronic annotation	6508 // proteolysis // inferred from electronic annotation /// 19538 // protein metabolism // inferred from electronic annotation	---	IPR000834 // Peptidase M14, carboxypeptidase A // 6.1E-78 /// IPR003146 // Peptidase M14A, carboxypeptidase activation peptide // 2.5E-8 /// IPR000834 // Peptidase M14, carboxypeptidase A // 6.1E-78 /// IPR003146 // Peptidase M14A, carboxypeptidase activation peptide // 6.0E-6
6182	147381_at	-0.438721	0.639112	-9.10089	2.53e-10	4.07e-09	13.2715	FBgn0034251	CG11423	CG11423	CG11423	36998	8137 // NADH dehydrogenase (ubiquinone) activity // inferred from sequence or structural similarity /// 5506 // iron ion binding // inferred from electronic annotation /// 8137 // NADH dehydrogenase (ubiquinone) activity // inferred from electronic annotation /// 10181 // FMN binding // inferred from electronic annotation /// 16651 // oxidoreductase activity, acting on NADH or NADPH // inferred f…	6118 // electron transport // inferred from electronic annotation /// 6119 // oxidative phosphorylation // inferred from electronic annotation /// 6120 // mitochondrial electron transport, NADH to ubiquinone // inferred from electronic annotation	5747 // respiratory chain complex I (sensu Eukaryota) // inferred from sequence or structural similarity /// 5747 // respiratory chain complex I (sensu Eukaryota) // inferred from sequence similarity	IPR001949 // Respiratory-chain NADH dehydrogenase, 51 kDa subunit // 1.0E-126
13235	154434_at	-0.772921	2.43478	-9.09771	2.55e-10	4.1e-09	13.2633	FBgn0032481	CG16972	CG16972	CG16972	34715	5515 // protein binding // inferred from physical interaction	---	---	---
9340	150539_at	-0.462386	0.745179	-9.09675	2.56e-10	4.1e-09	13.2609	FBgn0039251	CG17462	CG17462	CG17462	42983	3676 // nucleic acid binding // inferred from electronic annotation /// 5215 // transporter activity // inferred from electronic annotation /// 19984 // sigma DNA polymerase activity // inferred from sequence or structural similarity /// 19984 // sigma DNA polymerase activity // non-traceable author statement /// 16779 // nucleotidyltransferase activity // inferred from electronic annotation /// …	6260 // DNA replication // inferred from electronic annotation /// 6810 // transport // inferred from electronic annotation /// 7062 // sister chromatid cohesion // inferred from sequence or structural similarity /// 7062 // sister chromatid cohesion // non-traceable author statement /// 7062 // sister chromatid cohesion // inferred from sequence similarity	5634 // nucleus // inferred from sequence or structural similarity /// 16020 // membrane // inferred from electronic annotation /// 5634 // nucleus // inferred from sequence similarity	IPR002934 // DNA polymerase, beta-like region // 2.1E-17 /// IPR002058 // PAP/25A-associated domain // 4.7E-22
128	141327_at	-0.688073	0.825292	-9.07988	2.67e-10	4.27e-09	13.2177	FBgn0038135	CG8773	CG8773	CG8773	41634	4179 // membrane alanyl aminopeptidase activity // inferred from electronic annotation /// 4230 // glutamyl aminopeptidase activity // inferred from sequence or structural similarity /// 8270 // zinc ion binding // inferred from electronic annotation /// 4230 // glutamyl aminopeptidase activity // inferred from sequence similarity	6508 // proteolysis // inferred from electronic annotation	---	IPR001930 // Peptidase M1, membrane alanine aminopeptidase // 1.0E-126
4216	145415_at	-0.58133	0.501027	-9.07934	2.67e-10	4.27e-09	13.2163	FBgn0031092	CG9577	CG9577	CG9577	33016	8416 // delta5-delta2,4-dienoyl-CoA isomerase activity // inferred from sequence or structural similarity /// 16491 // oxidoreductase activity // inferred from electronic annotation /// 16836 // hydro-lyase activity // inferred from electronic annotation /// 5515 // protein binding // inferred from physical interaction /// 42802 // identical protein binding // inferred from physical interaction /…	6635 // fatty acid beta-oxidation // inferred from electronic annotation /// 8152 // metabolism // inferred from electronic annotation	---	IPR001753 // Enoyl-CoA hydratase/isomerase // 8.9E-31
5348	146547_at	-0.658137	3.55068	-9.07901	2.68e-10	4.27e-09	13.2154	FBgn0032868	CG17472	CG17472	CG17472	35320	---	---	---	---
4851	146050_at	-1.60281	2.01751	-9.0773	2.69e-10	4.28e-09	13.2111	FBgn0032069	CG9468	CG9468	CG9468	34206	4559 // alpha-mannosidase activity // inferred from sequence or structural similarity /// 16799 // hydrolase activity, hydrolyzing N-glycosyl compounds // inferred from electronic annotation /// 4559 // alpha-mannosidase activity // inferred from electronic annotation /// 15923 // mannosidase activity // inferred from electronic annotation /// 16787 // hydrolase activity // inferred from electron…	5975 // carbohydrate metabolism // inferred from electronic annotation /// 6013 // mannose metabolism // inferred from electronic annotation	5764 // lysosome // inferred from sequence or structural similarity /// 5764 // lysosome // inferred from sequence similarity	IPR000602 // Glycoside hydrolase, family 38 // 1.0E-126
7499	148698_at	-0.522428	1.457	-9.07349	2.71e-10	4.32e-09	13.2013	FBgn0036345	CG17300	CG17300	CG17300	39489	46933 // hydrogen-transporting ATP synthase activity, rotational mechanism // inferred from electronic annotation /// 46961 // hydrogen-transporting ATPase activity, rotational mechanism // inferred from electronic annotation	15986 // ATP synthesis coupled proton transport // inferred from electronic annotation	16469 // proton-transporting two-sector ATPase complex // inferred from electronic annotation	---
5807	147006_at	-0.506808	2.10153	-9.06654	2.76e-10	4.39e-09	13.1835	FBgn0033608	CG13220	CG13220	CG13220	36200	---	---	---	---
8684	149883_at	-0.780374	1.60871	-9.06331	2.78e-10	4.42e-09	13.1752	FBgn0038213	CG9624	CG9624	CG9624	41730	---	---	---	---
5862	147061_at	-1.18616	1.60242	-9.06258	2.79e-10	4.43e-09	13.1733	FBgn0033692	CG13176	CG13176	CG13176	36311	---	---	5667 // transcription factor complex // inferred from physical interaction	---
7958	149157_at	-0.598482	0.977743	-9.06006	2.81e-10	4.45e-09	13.1669	FBgn0037039	CG10587	CG10587	CG10587	40318	4175 // endopeptidase activity // inferred from sequence or structural similarity /// 4263 // chymotrypsin activity // inferred from electronic annotation /// 4295 // trypsin activity // non-traceable author statement /// 4175 // endopeptidase activity // inferred from sequence similarity	6508 // proteolysis // non-traceable author statement	---	IPR001254 // Peptidase S1, chymotrypsin // 1.3E-51
11020	152219_at	-1.10286	2.6838	-9.04982	2.88e-10	4.56e-09	13.1406	FBgn0032624	CG6304	CG6304	CG6304	35032	5515 // protein binding // inferred from physical interaction	---	---	---
9283	150482_at	-0.949554	1.34264	-9.04468	2.92e-10	4.61e-09	13.1274	FBgn0039151	CG13607	CG13607	CG13607	42859	---	---	---	---
9147	150346_at	-0.764678	2.03737	-9.04263	2.93e-10	4.62e-09	13.1222	FBgn0038934	CG5732	CG5732	CG5732	42602	3676 // nucleic acid binding // inferred from electronic annotation /// 4652 // polynucleotide adenylyltransferase activity // inferred from sequence or structural similarity /// 4652 // polynucleotide adenylyltransferase activity // inferred from sequence similarity	---	---	IPR002058 // PAP/25A-associated domain // 1.1E-23
6728	147927_at	-0.959716	0.498263	-9.02492	3.07e-10	4.82e-09	13.0767	FBgn0040291	CG16988	Roc1b	Roc1b	53445	4842 // ubiquitin-protein ligase activity // inferred from direct assay /// 4842 // ubiquitin-protein ligase activity // inferred from sequence or structural similarity /// 8270 // zinc ion binding // inferred from electronic annotation /// 5515 // protein binding // inferred from physical interaction /// 4840 // ubiquitin conjugating enzyme activity // inferred from sequence or structural simila…	16567 // protein ubiquitination // inferred from direct assay /// 30317 // sperm motility // inferred from mutant phenotype /// 7224 // smoothened signaling pathway // inferred from sequence or structural similarity /// 8283 // cell proliferation // inferred from sequence or structural similarity /// 6512 // ubiquitin cycle // inferred from electronic annotation	19005 // SCF ubiquitin ligase complex // non-traceable author statement /// 5634 // nucleus // inferred from sequence or structural similarity /// 19005 // SCF ubiquitin ligase complex // inferred from sequence or structural similarity /// 5634 // nucleus // inferred from electronic annotation	IPR001841 // Zn-finger, RING // 1.3E-5
120	141319_at	-1.28279	3.00733	-9.02191	3.09e-10	4.85e-09	13.069	FBgn0026141	CG5450	Cdlc2	Cytoplasmic dynein light chain 2	33319	3774 // motor activity // inferred from sequence or structural similarity /// 3777 // microtubule motor activity // inferred from electronic annotation /// 5200 // structural constituent of cytoskeleton // inferred from electronic annotation /// 42623 // ATPase activity, coupled // inferred from sequence or structural similarity /// 5515 // protein binding // inferred from physical interaction //…	6403 // RNA localization // inferred from electronic annotation /// 6886 // intracellular protein transport // inferred from electronic annotation /// 7018 // microtubule-based movement // inferred from sequence or structural similarity /// 7049 // cell cycle // inferred from electronic annotation /// 16192 // vesicle-mediated transport // inferred from electronic annotation /// 7017 // microtubu…	5737 // cytoplasm // non-traceable author statement /// 5856 // cytoskeleton // non-traceable author statement /// 5868 // cytoplasmic dynein complex // inferred from sequence or structural similarity /// 30286 // dynein complex // inferred from sequence or structural similarity /// 5874 // microtubule // inferred from electronic annotation /// 5875 // microtubule associated complex // inferred f…	IPR001372 // Dynein light chain, type 1 // 3.1E-67
11765	152964_at	-0.524695	2.04103	-9.01765	3.13e-10	4.88e-09	13.058	FBgn0033915	CG8485	CG8485	CG8485	36579	4674 // protein serine/threonine kinase activity // non-traceable author statement /// 5524 // ATP binding // inferred from electronic annotation /// 16909 // SAP kinase activity // inferred from sequence or structural similarity /// 166 // nucleotide binding // inferred from electronic annotation /// 4672 // protein kinase activity // inferred from electronic annotation /// 4674 // protein serin…	6468 // protein amino acid phosphorylation // non-traceable author statement /// 6468 // protein amino acid phosphorylation // inferred from electronic annotation	---	IPR000719 // Protein kinase // 2.4E-88
1608	142807_at	-1.104	4.8665	-8.98198	3.42e-10	5.31e-09	12.9663	FBgn0040994	CG17567	CG17567	CG17567	50468	---	---	---	---
995	142194_at	-0.562361	2.24681	-8.9803	3.44e-10	5.33e-09	12.9619	FBgn0031813	CG9527	CG9527	CG9527	33898	16402 // pristanoyl-CoA oxidase activity // non-traceable author statement /// 3995 // acyl-CoA dehydrogenase activity // inferred from electronic annotation /// 3997 // acyl-CoA oxidase activity // inferred from electronic annotation /// 16491 // oxidoreductase activity // inferred from electronic annotation /// 50660 // FAD binding // inferred from electronic annotation	6118 // electron transport // inferred from electronic annotation /// 6635 // fatty acid beta-oxidation // inferred from electronic annotation /// 6631 // fatty acid metabolism // inferred from electronic annotation	5777 // peroxisome // inferred from electronic annotation	IPR002655 // Acyl-CoA oxidase // 5.0E-24 /// IPR006090 // Acyl-CoA dehydrogenase, C-terminal // 5.8E-5
170	141369_at	-2.20773	1.47211	-8.9531	3.69e-10	5.69e-09	12.8919	FBgn0039778	CG18030	Jon99Fi	Jonah 99Fi	43622	4252 // serine-type endopeptidase activity // non-traceable author statement /// 4263 // chymotrypsin activity // inferred from electronic annotation /// 4295 // trypsin activity // inferred from electronic annotation /// 3700 // transcription factor activity // inferred from mutant phenotype /// 4252 // serine-type endopeptidase activity // inferred from electronic annotation /// 8233 // peptida…	6508 // proteolysis // inferred from electronic annotation /// 2168 // larval development (sensu Insecta) // inferred from mutant phenotype /// 7591 // molting cycle (sensu Insecta) // inferred from mutant phenotype	5634 // nucleus // inferred from direct assay	IPR001254 // Peptidase S1, chymotrypsin // 3.7E-55
2044	143243_at	-0.955362	1.99703	-8.95027	3.71e-10	5.72e-09	12.8846	FBgn0002571	CG8695	LvpL	Larval visceral protein L	35826	4556 // alpha-amylase activity // inferred from electronic annotation /// 4558 // alpha-glucosidase activity // inferred from sequence or structural similarity /// 4558 // alpha-glucosidase activity // non-traceable author statement /// 5215 // transporter activity // inferred from electronic annotation /// 4558 // alpha-glucosidase activity // inferred from electronic annotation /// 16787 // hyd…	6006 // glucose metabolism // non-traceable author statement /// 5975 // carbohydrate metabolism // inferred from electronic annotation	---	IPR006047 // Alpha amylase, catalytic domain // 1.0E-126
7378	148577_at	-0.79616	1.04579	-8.94547	3.76e-10	5.79e-09	12.8722	FBgn0036162	CG6140	CG6140	CG6140	39281	4333 // fumarate hydratase activity // inferred from sequence or structural similarity /// 4333 // fumarate hydratase activity // inferred from sequence similarity	6099 // tricarboxylic acid cycle // inferred from sequence or structural similarity /// 6106 // fumarate metabolism // inferred from electronic annotation /// 6099 // tricarboxylic acid cycle // inferred from sequence similarity	5737 // cytoplasm // inferred from sequence or structural similarity /// 5739 // mitochondrion // inferred from sequence or structural similarity /// 45239 // tricarboxylic acid cycle enzyme complex // inferred from electronic annotation /// 5737 // cytoplasm // inferred from sequence similarity /// 5739 // mitochondrion // inferred from sequence similarity	IPR000362 // Fumarate lyase // 1.0E-126
5370	146569_at	-1.25171	2.37369	-8.94402	3.77e-10	5.8e-09	12.8685	FBgn0032913	CG9259	CG9259	CG9259	35372	16301 // kinase activity // inferred from electronic annotation /// 16740 // transferase activity // inferred from electronic annotation	---	---	IPR004119 // Protein of unknown function DUF227 // 1.0E-85
6095	147294_at	-0.625879	0.942901	-8.94227	3.79e-10	5.81e-09	12.8639	FBgn0053017	CG33017	CG33017	CG33017	36811	---	---	---	---
8791	149990_at	-0.635116	0.621625	-8.92966	3.91e-10	6e-09	12.8314	FBgn0038387	CG5268	blp	black pearl	41937	---	1700 // embryonic development (sensu Insecta) // inferred from mutant phenotype /// 2168 // larval development (sensu Insecta) // inferred from mutant phenotype /// 6605 // protein targeting // inferred from electronic annotation /// 6810 // transport // inferred from electronic annotation /// 7275 // development // inferred from electronic annotation /// 15031 // protein transport // inferred fr…	5739 // mitochondrion // inferred from electronic annotation /// 16020 // membrane // inferred from electronic annotation	IPR005341 // Protein of unknown function UPF0108 // 2.3E-50
13626	154825_at	-0.642622	2.082	-8.92674	3.94e-10	6.04e-09	12.8239	FBgn0034689	CG2921	CG2921	CG2921	37515	---	---	---	IPR002791 // Protein of unknown function DUF89 // 1.0E-126
5286	146485_at	-0.499499	1.99635	-8.91794	4.03e-10	6.17e-09	12.8011	FBgn0032768	CG17564	CG17564	CG17564	35205	---	---	---	---
11517	152716_at	-0.920283	2.08853	-8.91145	4.1e-10	6.26e-09	12.7844	FBgn0035007	CG3492	CG3492	CG3492	37902	51082 // unfolded protein binding // inferred from sequence or structural similarity /// 5515 // protein binding // inferred from physical interaction /// 3755 // peptidyl-prolyl cis-trans isomerase activity // inferred from electronic annotation /// 16853 // isomerase activity // inferred from electronic annotation /// 51082 // unfolded protein binding // inferred from sequence similarity	6457 // protein folding // inferred from sequence or structural similarity /// 6457 // protein folding // inferred from electronic annotation /// 6457 // protein folding // inferred from sequence similarity	---	IPR002130 // Peptidyl-prolyl cis-trans isomerase, cyclophilin type // 6.7E-4
2635	143834_at	-0.401488	1.70282	-8.90992	4.12e-10	6.27e-09	12.7804	FBgn0015625	CG5814	CycB3	CycB3	42971	5515 // protein binding // inferred from physical interaction /// 16538 // cyclin-dependent protein kinase regulator activity // inferred from sequence or structural similarity /// 19209 // kinase activator activity // inferred from electronic annotation /// 16538 // cyclin-dependent protein kinase regulator activity // inferred from sequence similarity	74 // regulation of progression through cell cycle // inferred from electronic annotation /// 281 // cytokinesis after mitosis // inferred from direct assay /// 281 // cytokinesis after mitosis // inferred from mutant phenotype /// 7052 // mitotic spindle organization and biogenesis // inferred from mutant phenotype /// 7067 // mitosis // inferred from direct assay /// 910 // cytokinesis // infer…	5634 // nucleus // inferred from direct assay /// 15630 // microtubule cytoskeleton // inferred from electronic annotation /// 5634 // nucleus // inferred from electronic annotation	IPR004367 // Cyclin, C-terminal // 2.3E-36 /// IPR006671 // Cyclin, N-terminal domain // 3.5E-55
1067	142266_at	-1.02737	2.42	-8.8901	4.33e-10	6.58e-09	12.7292	FBgn0028379 /// FBgn0067976	CG7919	fan /// Dyakfan	farinelli /// fan	43926	5198 // structural molecule activity // inferred from electronic annotation /// 5515 // protein binding // inferred from physical interaction	6886 // intracellular protein transport // inferred from electronic annotation /// 7268 // synaptic transmission // inferred from electronic annotation /// 16192 // vesicle-mediated transport // inferred from electronic annotation	5886 // plasma membrane // inferred from sequence or structural similarity /// 5886 // plasma membrane // non-traceable author statement /// 5886 // plasma membrane // inferred from sequence similarity	IPR000535 // Major sperm protein (MSP) domain // 4.0E-34
4265	145464_at	-0.829117	1.43012	-8.88084	4.43e-10	6.73e-09	12.7052	FBgn0031163	CG14579	CG14579	CG14579	33096	5515 // protein binding // inferred from physical interaction	---	---	---
4137	145336_at	-1.0412	2.11736	-8.87818	4.46e-10	6.76e-09	12.6984	FBgn0030975	CG7349	CG7349	CG7349	32887	104 // succinate dehydrogenase activity // inferred from sequence or structural similarity /// 5506 // iron ion binding // inferred from electronic annotation /// 16491 // oxidoreductase activity // inferred from electronic annotation /// 104 // succinate dehydrogenase activity // inferred from sequence similarity	6099 // tricarboxylic acid cycle // inferred from electronic annotation /// 6118 // electron transport // inferred from electronic annotation	5749 // respiratory chain complex II (sensu Eukaryota) // inferred from sequence or structural similarity /// 16020 // membrane // inferred from electronic annotation /// 5749 // respiratory chain complex II (sensu Eukaryota) // inferred from sequence similarity	IPR001041 // Ferredoxin // 5.6E-4
5873	147072_at	-0.913368	1.17767	-8.87807	4.47e-10	6.76e-09	12.6981	FBgn0033705	CG13168	CG13168	CG13168	36327	---	---	---	---
13375	154574_at	-0.69344	3.7885	-8.87717	4.48e-10	6.77e-09	12.6957	FBgn0030718	CG9172	CG9172	CG9172	32565	3954 // NADH dehydrogenase activity // inferred from sequence or structural similarity /// 8137 // NADH dehydrogenase (ubiquinone) activity // inferred from sequence or structural similarity /// 8137 // NADH dehydrogenase (ubiquinone) activity // inferred from electronic annotation /// 3954 // NADH dehydrogenase activity // inferred from sequence similarity /// 8137 // NADH dehydrogenase (ubiquin…	6120 // mitochondrial electron transport, NADH to ubiquinone // inferred from sequence or structural similarity /// 6120 // mitochondrial electron transport, NADH to ubiquinone // inferred from electronic annotation /// 6120 // mitochondrial electron transport, NADH to ubiquinone // inferred from sequence similarity	5747 // respiratory chain complex I (sensu Eukaryota) // inferred from sequence or structural similarity /// 5747 // respiratory chain complex I (sensu Eukaryota) // inferred from sequence similarity	IPR006137 // NADH ubiquinone oxidoreductase domain, 20 kDa subunit // 3.1E-63
1420	142619_at	-0.869424	1.41349	-8.87259	4.53e-10	6.84e-09	12.6839	FBgn0033610	CG18335	CG18335	CG18335	36202	---	---	---	---
1630	142829_at	-0.515648	2.79354	-8.87256	4.53e-10	6.84e-09	12.6838	FBgn0030959	CG6961	CG6961	CG6961	32869	3729 // mRNA binding // inferred from sequence or structural similarity /// 166 // nucleotide binding // inferred from electronic annotation /// 3676 // nucleic acid binding // inferred from electronic annotation /// 3729 // mRNA binding // inferred from sequence similarity	---	---	IPR000504 // RNA-binding region RNP-1 (RNA recognition motif) // 8.7E-16
6100	147299_at	-0.842134	1.38549	-8.8644	4.62e-10	6.97e-09	12.6627	FBgn0050324	CG30324	CG30324	CG30324	246540	---	---	---	---
7099	148298_at	-0.891852	1.51157	-8.86046	4.67e-10	7.03e-09	12.6525	FBgn0035730	CG17744	CG17744	CG17744	38768	5515 // protein binding // inferred from physical interaction	---	---	---
7129	148328_at	-0.781753	1.45397	-8.8555	4.73e-10	7.11e-09	12.6396	FBgn0052380	CG32380	SMSr	SMSr	38823	---	6686 // sphingomyelin biosynthesis // non-traceable author statement /// 6629 // lipid metabolism // inferred from electronic annotation /// 6665 // sphingolipid metabolism // inferred from electronic annotation	16021 // integral to membrane // non-traceable author statement /// 16020 // membrane // inferred from electronic annotation /// 16021 // integral to membrane // inferred from electronic annotation	---
2425	143624_at	-1.19891	3.06914	-8.85298	4.76e-10	7.15e-09	12.6331	FBgn0010425	CG18681	Try	Trypsin	49080	4263 // chymotrypsin activity // inferred from electronic annotation /// 4295 // trypsin activity // non-traceable author statement /// 4252 // serine-type endopeptidase activity // inferred from electronic annotation	6508 // proteolysis // non-traceable author statement /// 6508 // proteolysis // inferred from electronic annotation	5576 // extracellular region // non-traceable author statement	IPR001254 // Peptidase S1, chymotrypsin // 5.6E-86
3193	144392_at	-0.433373	1.6901	-8.85261	4.77e-10	7.15e-09	12.6321	FBgn0029594	CG14806	CG14806	CG14806	31148	---	---	---	---
6085	147284_at	-0.819514	2.981	-8.85015	4.8e-10	7.19e-09	12.6258	FBgn0034082	CG10734	CG10734	CG10734	36787	5515 // protein binding // inferred from physical interaction	---	---	---
12140	153339_at	-1.07018	4.72677	-8.84774	4.83e-10	7.22e-09	12.6195	FBgn0039737	CG7920	CG7920	CG7920	43562	8411 // 4-hydroxybutyrate CoA-transferase activity // inferred from sequence or structural similarity /// 3824 // catalytic activity // inferred from electronic annotation /// 8411 // 4-hydroxybutyrate CoA-transferase activity // inferred from sequence similarity	6084 // acetyl-CoA metabolism // inferred from electronic annotation	---	IPR003702 // Acetyl-CoA hydrolase/transferase // 2.2E-12 /// IPR003702 // Acetyl-CoA hydrolase/transferase // 3.4E-72
8256	149455_at	-0.588284	1.96484	-8.84312	4.88e-10	7.29e-09	12.6076	FBgn0037514	CG10919	CG10919	CG10919	40917	---	---	---	---
3458	144657_at	-0.794005	0.576105	-8.83413	5e-10	7.44e-09	12.5842	FBgn0029963	CG10920	CG10920	CG10920	31688	5386 // carrier activity // inferred from sequence or structural similarity /// 5488 // binding // inferred from electronic annotation /// 5386 // carrier activity // inferred from sequence similarity	6810 // transport // inferred from electronic annotation	5739 // mitochondrion // inferred from sequence or structural similarity /// 16020 // membrane // inferred from electronic annotation /// 5739 // mitochondrion // inferred from sequence similarity	---
1476	142675_at	-0.54342	2.37011	-8.83308	5.01e-10	7.45e-09	12.5815	FBgn0027512	CG10254	CG10254	CG10254	42793	4840 // ubiquitin conjugating enzyme activity // inferred from sequence or structural similarity /// 4857 // enzyme inhibitor activity // inferred from electronic annotation /// 16874 // ligase activity // inferred from electronic annotation /// 4842 // ubiquitin-protein ligase activity // inferred from electronic annotation /// 4840 // ubiquitin conjugating enzyme activity // inferred from seque…	6464 // protein modification // inferred from electronic annotation /// 6508 // proteolysis // inferred from electronic annotation /// 6512 // ubiquitin cycle // inferred from electronic annotation /// 6916 // anti-apoptosis // inferred from electronic annotation	---	IPR000608 // Ubiquitin-conjugating enzymes // 1.7E-39
8100	149299_at	-0.761817	0.845846	-8.82129	5.17e-10	7.67e-09	12.5509	FBgn0037283	CG14658	CG14658	CG14658	40603	5515 // protein binding // inferred from physical interaction	---	---	---
1133	142332_f_at	-0.558232	1.36063	-8.81656	5.23e-10	7.74e-09	12.5386	FBgn0034740	CG3875	CG3875	CG3875	37577	3729 // mRNA binding // inferred from electronic annotation	6139 // nucleobase, nucleoside, nucleotide and nucleic acid metabolism // inferred from electronic annotation /// 6744 // ubiquinone biosynthesis // inferred from sequence or structural similarity /// 6915 // apoptosis // inferred from electronic annotation /// 7283 // spermatogenesis // inferred from electronic annotation /// 8283 // cell proliferation // inferred from electronic annotation /// …	---	---
1311	142510_at	-0.723844	1.15264	-8.81472	5.25e-10	7.77e-09	12.5339	FBgn0024556	CG6050	EfTuM	Elongation factor Tu mitochondrial	44438	3746 // translation elongation factor activity // inferred from sequence or structural similarity /// 3747 // translation release factor activity // inferred from electronic annotation /// 5525 // GTP binding // inferred from electronic annotation /// 5515 // protein binding // inferred from physical interaction /// 3677 // DNA binding // inferred from direct assay /// 166 // nucleotide binding /…	6414 // translational elongation // inferred from sequence or structural similarity /// 6445 // regulation of translation // inferred from electronic annotation /// 122 // negative regulation of transcription from RNA polymerase II promoter // inferred from mutant phenotype /// 6412 // protein biosynthesis // inferred from electronic annotation /// 6414 // translational elongation // inferred fro…	5739 // mitochondrion // inferred from sequence or structural similarity /// 785 // chromatin // inferred from direct assay /// 31523 // Myb complex // inferred from direct assay /// 5622 // intracellular // inferred from electronic annotation /// 5739 // mitochondrion // inferred from sequence similarity	IPR004161 // Elongation factor Tu, domain 2 // 1.3E-24 /// IPR000795 // Protein synthesis factor, GTP-binding // 1.5E-87 /// IPR004160 // Elongation factor Tu, C-terminal // 5.8E-39
7614	148813_at	-0.491466	1.28251	-8.81125	5.3e-10	7.83e-09	12.5249	FBgn0036520	CG13449	CG13449	CG13449	39695	---	---	---	---
1490	142689_at	-0.681769	0.63737	-8.80538	5.38e-10	7.94e-09	12.5096	FBgn0034979	CG13569	CG13569	CG13569	37863	---	6952 // defense response // inferred from electronic annotation	5576 // extracellular region // inferred from electronic annotation	IPR001283 // Allergen V5/Tpx-1 related // 1.4E-36 /// IPR001283 // Allergen V5/Tpx-1 related // 2.4E-38 /// IPR001283 // Allergen V5/Tpx-1 related // 8.4E-32
7793	148992_at	-0.892074	1.10041	-8.79415	5.54e-10	8.17e-09	12.4804	FBgn0036784	CG5103	CG5103	CG5103	40012	4802 // transketolase activity // inferred from sequence or structural similarity /// 4802 // transketolase activity // inferred from electronic annotation /// 4802 // transketolase activity // inferred from sequence similarity	6098 // pentose-phosphate shunt // inferred from electronic annotation	---	IPR005476 // Transketolase, C terminal // 2.7E-35 /// IPR005475 // Transketolase, central region // 4.0E-47 /// IPR005474 // Transketolase, N terminal // 1.8E-78
4433	145632_at	-0.561572	1.3927	-8.78801	5.63e-10	8.29e-09	12.4645	FBgn0028570	CG10838	robl22E	robl22E	33412	5200 // structural constituent of cytoskeleton // inferred from electronic annotation /// 42623 // ATPase activity, coupled // inferred from sequence or structural similarity /// 5515 // protein binding // inferred from physical interaction /// 42623 // ATPase activity, coupled // inferred from sequence similarity	6928 // cell motility // inferred from electronic annotation /// 7018 // microtubule-based movement // inferred from sequence or structural similarity /// 7018 // microtubule-based movement // inferred from sequence similarity	30286 // dynein complex // inferred from sequence or structural similarity /// 30286 // dynein complex // inferred from sequence similarity	IPR004942 // Roadblock/LC7 family // 2.8E-32
9564	150763_at	-0.458411	0.568726	-8.78442	5.68e-10	8.36e-09	12.4552	FBgn0039568	CG4815	CG4815	CG4815	43360	4252 // serine-type endopeptidase activity // inferred from sequence or structural similarity /// 4252 // serine-type endopeptidase activity // non-traceable author statement /// 4263 // chymotrypsin activity // inferred from electronic annotation /// 4295 // trypsin activity // inferred from electronic annotation /// 4252 // serine-type endopeptidase activity // inferred from electronic annotati…	6508 // proteolysis // non-traceable author statement /// 6508 // proteolysis // inferred from electronic annotation	---	IPR001254 // Peptidase S1, chymotrypsin // 1.9E-33
2462	143661_at	-0.524265	0.859319	-8.78019	5.74e-10	8.44e-09	12.4441	FBgn0011556	CG12387	Try	Trypsin	36216	4263 // chymotrypsin activity // inferred from electronic annotation /// 4295 // trypsin activity // inferred from sequence or structural similarity /// 4295 // trypsin activity // non-traceable author statement /// 5515 // protein binding // inferred from physical interaction /// 4252 // serine-type endopeptidase activity // inferred from electronic annotation /// 4295 // trypsin activity // inf…	6508 // proteolysis // non-traceable author statement /// 6508 // proteolysis // inferred from electronic annotation	5576 // extracellular region // non-traceable author statement	IPR001254 // Peptidase S1, chymotrypsin // 3.5E-74
10844	152043_at	-0.652731	1.89299	-8.77978	5.75e-10	8.44e-09	12.4431	FBgn0030624	CG9106	CG9106	CG9106	32454	5515 // protein binding // inferred from physical interaction	---	---	---
6766	147965_at	-0.905387	2.39643	-8.77504	5.82e-10	8.53e-09	12.4308	FBgn0035196	CG9129	CG9129	CG9129	38138	---	---	---	---
6740	147939_at	-0.997198	1.92085	-8.77448	5.83e-10	8.53e-09	12.4293	FBgn0035161	CG13898	CG13898	CG13898	38092	5509 // calcium ion binding // inferred from sequence or structural similarity /// 5516 // calmodulin binding // inferred from electronic annotation /// 5509 // calcium ion binding // inferred from electronic annotation /// 5509 // calcium ion binding // inferred from sequence similarity	7398 // ectoderm development // inferred from electronic annotation /// 19722 // calcium-mediated signaling // inferred from electronic annotation	---	IPR002048 // Calcium-binding EF-hand // 0.016 /// IPR002048 // Calcium-binding EF-hand // 7.4E-5 /// IPR002048 // Calcium-binding EF-hand // 1.6E-6
10991	152190_at	-0.653804	2.33423	-8.77406	5.83e-10	8.53e-09	12.4282	FBgn0028579	CG3268	phtf	phtf	35583	3677 // DNA binding // inferred from electronic annotation	6350 // transcription // inferred from electronic annotation /// 6355 // regulation of transcription, DNA-dependent // inferred from electronic annotation	5634 // nucleus // inferred from electronic annotation	---
1683	142882_at	-0.652385	0.644646	-8.77022	5.89e-10	8.61e-09	12.4182	FBgn0039501	CG5987	CG5987	CG5987	43282	4835 // tubulin-tyrosine ligase activity // inferred from sequence or structural similarity /// 5200 // structural constituent of cytoskeleton // inferred from electronic annotation /// 5515 // protein binding // inferred from physical interaction /// 4835 // tubulin-tyrosine ligase activity // inferred from electronic annotation /// 4835 // tubulin-tyrosine ligase activity // inferred from seque…	6464 // protein modification // inferred from electronic annotation /// 19538 // protein metabolism // inferred from electronic annotation	---	IPR004344 // Tubulin-tyrosine ligase // 1.0E-126
10089	151288_at	-0.672501	1.4104	-8.76939	5.9e-10	8.61e-09	12.4161	FBgn0040814	CG14113	CG14113	CG14113	50287	5515 // protein binding // inferred from physical interaction	---	---	---
10898	152097_at	-0.545498	2.54905	-8.76818	5.92e-10	8.62e-09	12.4129	FBgn0025712	CG13920	CG13920	CG13920	38203	---	---	---	---
13187	154386_at	-0.873238	1.75927	-8.76791	5.93e-10	8.62e-09	12.4122	FBgn0015600	CG9660	toc	toucan	33526	4197 // cysteine-type endopeptidase activity // inferred from electronic annotation /// 19901 // protein kinase binding // non-traceable author statement	70 // mitotic sister chromatid segregation // non-traceable author statement /// 6508 // proteolysis // inferred from electronic annotation /// 7052 // mitotic spindle organization and biogenesis // non-traceable author statement /// 30707 // ovarian follicle cell development (sensu Insecta) // traceable author statement	5634 // nucleus // inferred from direct assay /// 5634 // nucleus // non-traceable author statement /// 5876 // spindle microtubule // non-traceable author statement /// 5938 // cell cortex // inferred from direct assay	---
1441	142640_at	-0.561062	0.974471	-8.7651	5.97e-10	8.68e-09	12.4049	FBgn0031343	CG18131	CG18131	CG18131	33331	---	---	---	---
5066	146265_at	-0.599351	1.97816	-8.75763	6.09e-10	8.83e-09	12.3854	FBgn0032397	CG6756	Tom70	Translocase of outer membrane 70	34618	5386 // carrier activity // inferred from electronic annotation /// 15450 // protein translocase activity // inferred from sequence or structural similarity /// 16757 // transferase activity, transferring glycosyl groups // inferred from electronic annotation /// 5488 // binding // inferred from electronic annotation /// 15450 // protein translocase activity // inferred from sequence similarity	6626 // protein targeting to mitochondrion // inferred from sequence or structural similarity /// 6626 // protein targeting to mitochondrion // inferred from sequence similarity	5742 // mitochondrial outer membrane translocase complex // inferred from sequence or structural similarity /// 5742 // mitochondrial outer membrane translocase complex // inferred from sequence similarity	IPR001440 // TPR repeat // 2.3E-5 /// IPR001440 // TPR repeat // 1.2E-4 /// IPR001440 // TPR repeat // 0.033 /// IPR001440 // TPR repeat // 1.3E-4 /// IPR001440 // TPR repeat // 3.1E-6 /// IPR001440 // TPR repeat // 5.2E-6 /// IPR001440 // TPR repeat // 0.012
3157	144356_at	-0.742345	1.33072	-8.75684	6.1e-10	8.84e-09	12.3834	FBgn0029539	CG11663	CG11663	CG11663	31036	---	---	---	---
10627	151826_at	-0.797161	3.79652	-8.75013	6.2e-10	8.98e-09	12.3659	FBgn0037913	CG6783	CG6783	CG6783	3772232	5215 // transporter activity // inferred from electronic annotation /// 5504 // fatty acid binding // inferred from sequence or structural similarity /// 5488 // binding // inferred from electronic annotation /// 8289 // lipid binding // inferred from electronic annotation /// 5504 // fatty acid binding // inferred from sequence similarity	6810 // transport // inferred from electronic annotation	5743 // mitochondrial inner membrane // inferred from electronic annotation /// 16020 // membrane // inferred from electronic annotation /// 16021 // integral to membrane // inferred from electronic annotation	IPR000566 // Lipocalin-related protein and Bos/Can/Equ allergen // 1.6E-36
5236	146435_at	-0.46145	1.4509	-8.74621	6.27e-10	9.06e-09	12.3557	FBgn0032680 /// FBgn0068827 /// FBgn0068721 /// FBgn0068651	CG10174	Ntf-2r /// DmauNtf-2r /// DsecNtf-2r /// DsimNtf-2r	Nuclear transport factor-2-related /// Nuclear transport factor-2-related /// Nuclear transport factor-2-related /// Nuclear transport factor-2-related	35101	8565 // protein transporter activity // inferred from electronic annotation	6606 // protein import into nucleus // inferred from sequence or structural similarity /// 6606 // protein import into nucleus // inferred from sequence similarity	5622 // intracellular // inferred from electronic annotation /// 5634 // nucleus // inferred from electronic annotation	IPR002075 // Nuclear transport factor 2 (NTF2) // 2.2E-41
2436	143635_at	-0.472603	2.47649	-8.74373	6.31e-10	9.1e-09	12.3493	FBgn0010808	CG1715	l(3)03670	lethal (3) 03670	43672	5515 // protein binding // inferred from physical interaction	---	---	IPR010625 // CHCH // 4.1E-4 /// IPR005180 // Protein of unknown function DUF302 // 1.4E-30
4550	145749_at	-0.701444	1.86804	-8.74365	6.31e-10	9.1e-09	12.3491	FBgn0031591	CG15425	CG15425	CG15425	33630	5515 // protein binding // inferred from physical interaction	---	---	---
10976	152175_at	-0.696012	2.02263	-8.74279	6.32e-10	9.11e-09	12.3468	FBgn0036931	CG14183	CG14183	CG14183	40192	3924 // GTPase activity // inferred from electronic annotation /// 5525 // GTP binding // inferred from electronic annotation /// 5515 // protein binding // inferred from physical interaction	6955 // immune response // inferred from electronic annotation	---	IPR000048 // IQ calmodulin-binding region // 4.2E-7
3923	145122_at	-0.530942	1.66948	-8.73975	6.37e-10	9.18e-09	12.3389	FBgn0030643	CG15641	CG15641	CG15641	32477	---	---	---	---
7008	148207_at	-0.450787	1.61148	-8.73165	6.51e-10	9.36e-09	12.3178	FBgn0035584	CG17030	CG17030	CG17030	38591	4840 // ubiquitin conjugating enzyme activity // inferred from sequence or structural similarity /// 16874 // ligase activity // inferred from electronic annotation /// 5515 // protein binding // inferred from physical interaction /// 4842 // ubiquitin-protein ligase activity // inferred from electronic annotation /// 4840 // ubiquitin conjugating enzyme activity // inferred from sequence similar…	6464 // protein modification // inferred from electronic annotation /// 6512 // ubiquitin cycle // inferred from electronic annotation /// 19538 // protein metabolism // inferred from electronic annotation	---	IPR000608 // Ubiquitin-conjugating enzymes // 9.9E-47
11916	153115_at	-0.669919	3.77802	-8.71316	6.82e-10	9.8e-09	12.2696	FBgn0037891	CG5214	CG5214	CG5214	41360	4149 // dihydrolipoyllysine-residue succinyltransferase activity // inferred from sequence or structural similarity /// 16407 // acetyltransferase activity // inferred from electronic annotation /// 4149 // dihydrolipoyllysine-residue succinyltransferase activity // inferred from electronic annotation /// 8415 // acyltransferase activity // inferred from electronic annotation /// 31405 // lipoic …	6099 // tricarboxylic acid cycle // inferred from sequence or structural similarity /// 6099 // tricarboxylic acid cycle // inferred from electronic annotation /// 8152 // metabolism // inferred from electronic annotation /// 6099 // tricarboxylic acid cycle // inferred from sequence similarity	9353 // oxoglutarate dehydrogenase complex (sensu Eukaryota) // inferred from sequence or structural similarity /// 45252 // oxoglutarate dehydrogenase complex // inferred from electronic annotation /// 9353 // oxoglutarate dehydrogenase complex (sensu Eukaryota) // inferred from sequence similarity	IPR001078 // Catalytic domain of components of various dehydrogenase complexes // 8.9E-119 /// IPR000089 // Biotin/lipoyl attachment // 5.4E-23
12040	153239_at	-0.4418	3.6526	-8.71106	6.86e-10	9.84e-09	12.2641	FBgn0033382	CG8058	CG8058	CG8058	35930	3824 // catalytic activity // inferred from electronic annotation	---	---	---
3292	144491_at	-1.42701	2.34823	-8.70022	7.06e-10	1.01e-08	12.2358	FBgn0029725	CG2871	CG2871	CG2871	31411	---	---	---	---
11540	152739_at	-0.84404	1.33379	-8.69815	7.1e-10	1.02e-08	12.2304	---	CG15891 /// CG15892	---	---	---	---	---	---	---
9592	150791_at	-0.492956	0.531603	-8.69673	7.12e-10	1.02e-08	12.2267	FBgn0039611	CG14528	CG14528	CG14528	43410	4222 // metalloendopeptidase activity // inferred from sequence or structural similarity /// 4245 // neprilysin activity // inferred from electronic annotation /// 8270 // zinc ion binding // inferred from electronic annotation /// 8233 // peptidase activity // inferred from electronic annotation /// 8237 // metallopeptidase activity // inferred from electronic annotation /// 16787 // hydrolase a…	6508 // proteolysis // inferred from electronic annotation	16020 // membrane // inferred from electronic annotation	IPR008753 // Peptidase M13 // 1.0E-7 /// IPR000718 // Peptidase M13, neprilysin // 1.0E-36
1648	142847_at	-0.795216	1.90309	-8.69539	7.15e-10	1.02e-08	12.2232	FBgn0040931	CG9034	CG9034	CG9034	50405	---	---	---	---
10613	151812_at	-0.844022	4.25593	-8.68615	7.32e-10	1.04e-08	12.199	FBgn0016691	CG4307	Oscp	Oligomycin sensitivity-conferring protein	41845	8553 // hydrogen-exporting ATPase activity, phosphorylative mechanism // inferred from sequence or structural similarity /// 8553 // hydrogen-exporting ATPase activity, phosphorylative mechanism // non-traceable author statement /// 46933 // hydrogen-transporting ATP synthase activity, rotational mechanism // inferred from electronic annotation /// 46961 // hydrogen-transporting ATPase activity, …	15986 // ATP synthesis coupled proton transport // inferred from electronic annotation /// 15992 // proton transport // inferred from sequence or structural similarity /// 6754 // ATP biosynthesis // inferred from electronic annotation /// 6810 // transport // inferred from electronic annotation /// 6811 // ion transport // inferred from electronic annotation /// 15992 // proton transport // infe…	5756 // proton-transporting ATP synthase, central stalk (sensu Eukaryota) // inferred from sequence or structural similarity /// 5739 // mitochondrion // inferred from electronic annotation /// 16469 // proton-transporting two-sector ATPase complex // inferred from electronic annotation /// 45261 // proton-transporting ATP synthase complex, catalytic core F(1) // inferred from electronic annotati…	IPR000711 // H+-transporting two-sector ATPase, delta (OSCP) subunit // 9.8E-31 /// IPR000711 // H+-transporting two-sector ATPase, delta (OSCP) subunit // 4.0E-47 /// IPR000711 // H+-transporting two-sector ATPase, delta (OSCP) subunit // 4.7E-44
12149	153348_at	-1.16907	3.41855	-8.66547	7.72e-10	1.1e-08	12.145	FBgn0035600	CG4769	CG4769	CG4769	38612	16491 // oxidoreductase activity // inferred from electronic annotation /// 45153 // electron transporter, transferring electrons within CoQH2-cytochrome c reductase complex activity // inferred from sequence or structural similarity /// 5515 // protein binding // inferred from physical interaction /// 20037 // heme binding // inferred from electronic annotation /// 45153 // electron transporter,…	6119 // oxidative phosphorylation // inferred from sequence or structural similarity /// 6122 // mitochondrial electron transport, ubiquinol to cytochrome c // inferred from sequence or structural similarity /// 6118 // electron transport // inferred from electronic annotation /// 6119 // oxidative phosphorylation // inferred from sequence similarity /// 6122 // mitochondrial electron transport, …	5750 // respiratory chain complex III (sensu Eukaryota) // inferred from sequence or structural similarity /// 5746 // mitochondrial electron transport chain // inferred from electronic annotation /// 5750 // respiratory chain complex III (sensu Eukaryota) // inferred from sequence similarity	IPR002326 // Cytochrome c1 // 1.0E-126
5962	147161_at	-0.935018	1.45606	-8.66219	7.79e-10	1.11e-08	12.1364	FBgn0033860	CG18369	CG18369	CG18369	36515	4177 // aminopeptidase activity // inferred from electronic annotation /// 8237 // metallopeptidase activity // inferred from electronic annotation	6508 // proteolysis // inferred from electronic annotation /// 7498 // mesoderm development // inferred from expression pattern	5622 // intracellular // inferred from electronic annotation	IPR008283 // Peptidase M17, cytosol aminopeptidase, N-terminal // 2.4E-62 /// IPR000819 // Peptidase M17, cytosol aminopeptidase, C-terminal // 3.4E-46 /// IPR000819 // Peptidase M17, cytosol aminopeptidase, C-terminal // 5.0E-19
4608	145807_at	-0.560218	1.17797	-8.65809	7.87e-10	1.11e-08	12.1257	FBgn0031677	CG14036	CG14036	CG14036	33735	---	---	---	IPR007917 // Protein of unknown function UPF0224 // 4.5E-10
7376	148575_at	-0.741224	0.69693	-8.65807	7.87e-10	1.11e-08	12.1256	FBgn0036160	CG12289	CG12289	CG12289	39279	4454 // ketohexokinase activity // inferred from sequence or structural similarity /// 5506 // iron ion binding // inferred from electronic annotation /// 4454 // ketohexokinase activity // inferred from sequence similarity	5996 // monosaccharide metabolism // inferred from electronic annotation /// 6118 // electron transport // inferred from electronic annotation /// 6810 // transport // inferred from electronic annotation	---	IPR002173 // Carbohydrate kinase, PfkB // 1.7E-4 /// IPR002173 // Carbohydrate kinase, PfkB // 1.7E-4
9936	151135_at	-0.562072	0.912403	-8.65818	7.87e-10	1.11e-08	12.1259	FBgn0040651	CG15458	CG15458	CG15458	50124	3735 // structural constituent of ribosome // inferred from electronic annotation	6412 // protein biosynthesis // inferred from electronic annotation	5622 // intracellular // inferred from electronic annotation /// 5840 // ribosome // inferred from electronic annotation	---
11563	152762_at	-0.834773	4.74374	-8.65503	7.93e-10	1.12e-08	12.1177	FBgn0035917	CG6416	CG6416	CG6416	38988	5515 // protein binding // inferred from electronic annotation	7498 // mesoderm development // inferred from expression pattern	---	IPR001478 // PDZ/DHR/GLGF domain // 3.6E-5 /// IPR001478 // PDZ/DHR/GLGF domain // 2.2E-12
2700	143899_at	-1.67713	4.18463	-8.64965	8.04e-10	1.13e-08	12.1036	FBgn0019624	CG14724	CoVa	Cytochrome c oxidase subunit Va	41432	4129 // cytochrome-c oxidase activity // inferred from sequence or structural similarity /// 4129 // cytochrome-c oxidase activity // non-traceable author statement /// 5515 // protein binding // inferred from physical interaction /// 4129 // cytochrome-c oxidase activity // inferred from electronic annotation /// 5506 // iron ion binding // inferred from electronic annotation /// 16491 // oxidor…	6118 // electron transport // non-traceable author statement /// 6123 // mitochondrial electron transport, cytochrome c to oxygen // inferred from sequence or structural similarity /// 6118 // electron transport // inferred from electronic annotation /// 6123 // mitochondrial electron transport, cytochrome c to oxygen // inferred from sequence similarity	5743 // mitochondrial inner membrane // non-traceable author statement /// 5751 // respiratory chain complex IV (sensu Eukaryota) // inferred from sequence or structural similarity /// 5751 // respiratory chain complex IV (sensu Eukaryota) // non-traceable author statement /// 5739 // mitochondrion // inferred from electronic annotation /// 16020 // membrane // inferred from electronic annotation…	IPR003204 // Cytochrome c oxidase, subunit Va // 2.3E-100
[truncated: 1,479 more rows]
