# Supplementary material for: Gene expression changes in response to aging compared to heat stress, oxidative stress and ionizing radiation in Drosophila melanogaster
Source: Aging (Albany NY). 2012 Nov 30;4(11):768–89. doi: 10.18632/aging.100499 (PMC3560439; doi:10.18632/aging.100499)
Supplement: Supplementary file 7 [file aging-04-768-s007.xlsx]

## Sheet: TableS4c.Sugarup
Table S4c. Sugar up
ID	M	A	t	P.Value	adj.P.Val	B	FlyBase	Ensembl	Gene.Symbol	Gene.Title	Entrez.Gene	Gene.Ontology.Molecular.Function	Gene.Ontology.Biological.Process	Gene.Ontology.Cellular.Component	InterPro
5791	146990_at	1.62877	0.2182	19.8081	2.52853e-19	8.85617e-16	33.4984	FBgn0033592	CG13215	CG13215	CG13215	36182	---	---	---	---
6534	147733_r_at	0.989826	0.650592	13.6678	8.92911e-15	8.33979e-12	23.6305	FBgn0034809	CG13542	CG13542	CG13542	37653	---	---	---	---
7440	148639_at	1.06876	4.5425	12.4633	1.04754e-13	8.15332e-11	21.2459	FBgn0036262	CG6910	CG6910	CG6910	39391	16491 // oxidoreductase activity // inferred from electronic annotation	5975 // carbohydrate metabolism // inferred from electronic annotation /// 6139 // nucleobase, nucleoside, nucleotide and nucleic acid metabolism // inferred from electronic annotation	---	IPR007828 // Protein of unknown function DUF706 // 1.0E-126
10146	151345_at	0.811686	0.436826	12.1641	1.98054e-13	1.3213e-10	20.6262	---	---	---	---	---	---	---	---	---
572	141771_at	0.880185	1.49505	11.5237	8.01797e-13	3.30387e-10	19.2621	FBgn0050456	CG30456	CG30456	CG30456	36929	5085 // guanyl-nucleotide exchange factor activity // inferred from electronic annotation	---	---	IPR000219 // DH domain // 2.6E-5 /// IPR000219 // DH domain // 7.1E-5
1183	142382_at	0.999402	-0.274554	11.3935	1.07196e-12	4.29091e-10	18.9782	FBgn0026577	CG8677	CG8677	CG8677	35397	3677 // DNA binding // inferred from electronic annotation /// 5515 // protein binding // inferred from electronic annotation /// 8270 // zinc ion binding // inferred from electronic annotation	6355 // regulation of transcription, DNA-dependent // inferred from electronic annotation	---	IPR001965 // Zn-finger-like, PHD finger // 2.2E-12
5359	146558_at	0.854723	1.14103	11.3427	1.20115e-12	4.67448e-10	18.8669	FBgn0032896	CG14400	CG14400	CG14400	35354	---	---	---	---
11280	152479_at	0.548482	0.72028	11.2253	1.56444e-12	5.82037e-10	18.6083	FBgn0032395	CG6734	CG6734	CG6734	34616	16230 // sphingomyelin phosphodiesterase activator activity // inferred from sequence or structural similarity /// 16230 // sphingomyelin phosphodiesterase activator activity // inferred from sequence similarity	---	---	IPR000409 // Beige/BEACH domain // 1.5E-7 /// IPR000409 // Beige/BEACH domain // 4.2E-24 /// IPR001680 // G-protein beta WD-40 repeat // 4.4E-8 /// IPR001680 // G-protein beta WD-40 repeat // 0.0018 /// IPR001680 // G-protein beta WD-40 repeat // 0.55 /// IPR001680 // G-protein beta WD-40 repeat // 0.21 /// IPR001680 // G-protein beta WD-40 repeat // 0.19
13935	155134_at	0.59114	1.72212	11.2098	1.62023e-12	5.82037e-10	18.574	FBgn0036333	CG11259	MICAL-like	MICAL-like	39475	3779 // actin binding // inferred from sequence or structural similarity /// 5200 // structural constituent of cytoskeleton // inferred from electronic annotation /// 8270 // zinc ion binding // inferred from electronic annotation /// 3779 // actin binding // inferred from sequence similarity	7010 // cytoskeleton organization and biogenesis // inferred from electronic annotation	---	IPR001781 // Zn-binding protein, LIM // 1.8E-11 /// IPR001715 // Calponin-like actin-binding // 6.8E-30
2503	143702_at	0.851121	5.01002	11.1665	1.78707e-12	6.10654e-10	18.4781	FBgn0013272	CG5820	Gp150	Gp150	37549	5524 // ATP binding // inferred from electronic annotation	7155 // cell adhesion // inferred from electronic annotation /// 7185 // transmembrane receptor protein tyrosine phosphatase signaling pathway // inferred from direct assay /// 7456 // eye development (sensu Endopterygota) // inferred from mutant phenotype /// 19226 // transmission of nerve impulse // inferred from electronic annotation	5886 // plasma membrane // inferred from direct assay	IPR001611 // Leucine-rich repeat // 4.3E-4 /// IPR001611 // Leucine-rich repeat // 0.0063 /// IPR001611 // Leucine-rich repeat // 6.1E-4 /// IPR001611 // Leucine-rich repeat // 0.0040 /// IPR001611 // Leucine-rich repeat // 0.0095 /// IPR001611 // Leucine-rich repeat // 0.16 /// IPR001611 // Leucine-rich repeat // 0.75 /// IPR001611 // Leucine-rich repeat // 0.55 /// IPR001611 // Leucine-rich rep…
10839	152038_at	0.832404	1.67731	11.1742	1.75632e-12	6.10654e-10	18.4951	FBgn0021800	CG3920	l(2)k16918	lethal (2) k16918	47399	---	---	---	---
13207	154406_at	1.06549	4.01115	11.1381	1.9062e-12	6.35853e-10	18.4149	FBgn0033356	CG8229	CG8229	CG8229	35898	---	---	---	---
2199	143398_at	1.14776	6.05344	11.0682	2.23458e-12	7.28057e-10	18.2592	FBgn0003942	CG5271	RpS27A	Ribosomal protein S27A	34420	3676 // nucleic acid binding // inferred from electronic annotation /// 3735 // structural constituent of ribosome // inferred from sequence or structural similarity /// 3735 // structural constituent of ribosome // non-traceable author statement /// 5515 // protein binding // inferred from sequence or structural similarity /// 5515 // protein binding // inferred from physical interaction /// 373…	6325 // establishment and/or maintenance of chromatin architecture // non-traceable author statement /// 6355 // regulation of transcription, DNA-dependent // non-traceable author statement /// 6412 // protein biosynthesis // inferred from sequence or structural similarity /// 6464 // protein modification // inferred from sequence or structural similarity /// 6510 // ATP-dependent proteolysis // …	5634 // nucleus // non-traceable author statement /// 5737 // cytoplasm // non-traceable author statement /// 5840 // ribosome // non-traceable author statement /// 5843 // cytosolic small ribosomal subunit (sensu Eukaryota) // inferred from sequence or structural similarity /// 5622 // intracellular // inferred from electronic annotation /// 5840 // ribosome // inferred from electronic annotatio…	IPR002906 // Ribosomal protein S27a // 1.8E-31 /// IPR000626 // Ubiquitin // 3.8E-43
2439	143638_at	0.859958	4.02947	11.0099	2.55266e-12	7.77453e-10	18.1288	FBgn0011217	CG7425	eff	effete	41785	4840 // ubiquitin conjugating enzyme activity // inferred from genetic interaction /// 4840 // ubiquitin conjugating enzyme activity // inferred from sequence or structural similarity /// 4840 // ubiquitin conjugating enzyme activity // non-traceable author statement /// 4840 // ubiquitin conjugating enzyme activity // traceable author statement /// 5515 // protein binding // inferred from physic…	1745 // compound eye morphogenesis (sensu Endopterygota) // inferred from mutant phenotype /// 6512 // ubiquitin cycle // inferred from genetic interaction /// 6512 // ubiquitin cycle // inferred from sequence or structural similarity /// 7001 // chromosome organization and biogenesis (sensu Eukaryota) // inferred from mutant phenotype /// 7067 // mitosis // inferred from mutant phenotype /// 714…	---	IPR000608 // Ubiquitin-conjugating enzymes // 4.2E-81
1048	142247_r_at	0.730395	0.0732319	10.7613	4.52225e-12	1.34801e-09	17.5682	FBgn0033798	CG15870	CG15870	CG15870	36446	---	---	---	---
6974	148173_at	0.787384	2.11117	10.6997	5.21707e-12	1.49166e-09	17.4279	FBgn0035541	CG15019	CG15019	CG15019	38542	---	---	---	---
12450	153649_at	1.08388	4.15053	10.494	8.43892e-12	2.18943e-09	16.9558	FBgn0033393	CG8029	CG8029	CG8029	35944	8900 // hydrogen:potassium-exchanging ATPase activity // inferred from sequence or structural similarity /// 46933 // hydrogen-transporting ATP synthase activity, rotational mechanism // inferred from electronic annotation /// 46961 // hydrogen-transporting ATPase activity, rotational mechanism // inferred from electronic annotation /// 5515 // protein binding // inferred from physical interactio…	15986 // ATP synthesis coupled proton transport // inferred from electronic annotation	5889 // hydrogen:potassium-exchanging ATPase complex // inferred from sequence or structural similarity /// 16469 // proton-transporting two-sector ATPase complex // inferred from electronic annotation /// 16021 // integral to membrane // inferred from electronic annotation /// 5889 // hydrogen:potassium-exchanging ATPase complex // inferred from sequence similarity	IPR008388 // Vacuolar ATP synthase subunit S1 // 1.0E-126
10486	151685_r_at	0.822067	2.2295	10.2335	1.56378e-11	3.77734e-09	16.3496	FBgn0052813	CG32813	CG32813	CG32813	31089	---	---	---	---
10517	151716_s_at	0.707142	1.72843	10.1832	1.76342e-11	4.15153e-09	16.2315	FBgn0052043	CG32043	CG32043	CG32043	39099	---	---	---	---
12040	153239_at	0.565564	3.6526	10.1797	1.77796e-11	4.15153e-09	16.2234	FBgn0033382	CG8058	CG8058	CG8058	35930	3824 // catalytic activity // inferred from electronic annotation	---	---	---
1524	142723_at	1.23166	4.37781	10.1611	1.85897e-11	4.20068e-09	16.1796	FBgn0010348	CG8385	Arf79F	ADP ribosylation factor 79F	40506	3924 // GTPase activity // inferred from sequence or structural similarity /// 3924 // GTPase activity // non-traceable author statement /// 5525 // GTP binding // inferred from sequence or structural similarity /// 5525 // GTP binding // non-traceable author statement /// 5515 // protein binding // inferred from physical interaction /// 166 // nucleotide binding // inferred from electronic annot…	6471 // protein amino acid ADP-ribosylation // inferred from sequence or structural similarity /// 6471 // protein amino acid ADP-ribosylation // non-traceable author statement /// 6886 // intracellular protein transport // inferred from electronic annotation /// 7155 // cell adhesion // inferred from mutant phenotype /// 7166 // cell surface receptor linked signal transduction // inferred from e…	5622 // intracellular // inferred from electronic annotation /// 5795 // Golgi stack // inferred from electronic annotation	IPR006689 // ARF/SAR superfamily // 1.0E-126
5252	146451_at	0.489837	-0.133734	10.0646	2.34368e-11	4.90074e-09	15.9517	FBgn0032708	CG15166	CG15166	CG15166	35133	---	---	---	---
12995	154194_at	0.533518	0.123179	10.0478	2.44e-11	4.96999e-09	15.912	FBgn0030720	CG8939	CG8939	CG8939	32568	3676 // nucleic acid binding // inferred from electronic annotation /// 8649 // rRNA methyltransferase activity // inferred from sequence or structural similarity /// 8649 // rRNA methyltransferase activity // inferred from sequence similarity	6364 // rRNA processing // inferred from sequence or structural similarity /// 16072 // rRNA metabolism // inferred from electronic annotation /// 6364 // rRNA processing // inferred from sequence similarity	5730 // nucleolus // inferred from sequence or structural similarity /// 5730 // nucleolus // inferred from sequence similarity	IPR002877 // Ribosomal RNA methyltransferase RrmJ/FtsJ // 1.0E-87
550	141749_at	1.66466	4.09016	10.019	2.6159e-11	5.09011e-09	15.8435	FBgn0013576	CG32464	l(3)82Fd	l(3)82Fd	45467	5515 // protein binding // inferred from physical interaction	16998 // cell wall catabolism // inferred from electronic annotation	---	IPR002482 // Peptidoglycan-binding LysM // 1.0E-15 /// IPR002482 // Peptidoglycan-binding LysM // 1.0E-15
7081	148280_at	0.64077	-0.338163	10.007	2.69222e-11	5.10844e-09	15.8152	FBgn0035701	CG14911	CG14911	CG14911	38732	---	---	---	---
9381	150580_at	0.634828	0.870309	10.0006	2.73471e-11	5.10844e-09	15.7998	FBgn0051098	CG31098	CG31098	CG31098	43057	---	---	---	IPR004119 // Protein of unknown function DUF227 // 2.2E-103
2772	143971_at	1.32885	3.42583	9.95736	3.03571e-11	5.58899e-09	15.6971	FBgn0023077	CG2457	inaF	inaF	32126	5246 // calcium channel regulator activity // inferred from genetic interaction /// 5246 // calcium channel regulator activity // inferred from mutant phenotype	9416 // response to light stimulus // inferred from mutant phenotype /// 16056 // rhodopsin mediated signaling // inferred from mutant phenotype /// 16058 // maintenance of rhodopsin mediated signaling // inferred from mutant phenotype	---	---
12940	154139_at	0.546277	0.711203	9.94716	3.11164e-11	5.58899e-09	15.6727	FBgn0039709	CG31009	Cad99C	Cad99C	43528	5509 // calcium ion binding // inferred from electronic annotation	7156 // homophilic cell adhesion // inferred from electronic annotation /// 7165 // signal transduction // inferred from electronic annotation /// 16339 // calcium-dependent cell-cell adhesion // inferred from sequence or structural similarity /// 48100 // wing disc anterior/posterior pattern formation // inferred from mutant phenotype /// 16339 // calcium-dependent cell-cell adhesion // inferred…	5887 // integral to plasma membrane // inferred from sequence or structural similarity /// 16021 // integral to membrane // non-traceable author statement /// 16020 // membrane // inferred from electronic annotation /// 5887 // integral to plasma membrane // inferred from sequence similarity	IPR002126 // Cadherin // 2.0E-21 /// IPR002126 // Cadherin // 8.8E-6 /// IPR002126 // Cadherin // 2.7E-12 /// IPR002126 // Cadherin // 1.6E-23 /// IPR002126 // Cadherin // 3.1E-22 /// IPR002126 // Cadherin // 4.1E-12 /// IPR002126 // Cadherin // 3.6E-12 /// IPR002126 // Cadherin // 1.1E-6
8168	149367_at	0.442167	-0.0854216	9.83835	4.05281e-11	6.92437e-09	15.4126	FBgn0046876	CG31557	Obp83ef	Odorant-binding protein 83ef	40747	5549 // odorant binding // inferred from sequence or structural similarity /// 5549 // odorant binding // non-traceable author statement /// 5549 // odorant binding // inferred from electronic annotation /// 5549 // odorant binding // inferred from sequence similarity	6810 // transport // inferred from electronic annotation /// 7606 // sensory perception of chemical stimulus // inferred from sequence or structural similarity /// 7606 // sensory perception of chemical stimulus // inferred from sequence similarity	---	---
9324	150523_at	0.632434	-0.330284	9.81002	4.34265e-11	7.07947e-09	15.3445	FBgn0039222	CG6879	CG6879	CG6879	42949	4601 // peroxidase activity // inferred from sequence or structural similarity /// 4601 // peroxidase activity // inferred from electronic annotation /// 5506 // iron ion binding // inferred from electronic annotation /// 16491 // oxidoreductase activity // inferred from electronic annotation /// 46872 // metal ion binding // inferred from electronic annotation /// 4601 // peroxidase activity // …	6800 // oxygen and reactive oxygen species metabolism // inferred from electronic annotation /// 6952 // defense response // inferred from electronic annotation	---	IPR002007 // Animal haem peroxidase // 1.0E-126
11348	152547_at	0.57237	3.4636	9.80883	4.35517e-11	7.07947e-09	15.3417	FBgn0033385	CG8055	CG8055	CG8055	35933	5386 // carrier activity // inferred from electronic annotation /// 5488 // binding // inferred from electronic annotation /// 5515 // protein binding // inferred from physical interaction /// 42802 // identical protein binding // inferred from physical interaction	6886 // intracellular protein transport // inferred from electronic annotation	---	IPR005024 // Snf7 // 4.7E-72
5464	146663_at	0.554248	1.08252	9.779	4.68426e-11	7.45756e-09	15.27	FBgn0033050	CG7865	PNGase	PNGase	35527	224 // peptide-N4-(N-acetyl-beta-glucosaminyl)asparagine amidase activity // non-traceable author statement /// 224 // peptide-N4-(N-acetyl-beta-glucosaminyl)asparagine amidase activity // inferred from electronic annotation /// 16787 // hydrolase activity // inferred from electronic annotation	6508 // proteolysis // inferred from electronic annotation	---	IPR002931 // Transglutaminase-like domain // 2.8E-14 /// IPR002931 // Transglutaminase-like domain // 2.8E-14
11537	152736_at	0.897578	2.15672	9.70547	5.60827e-11	8.44859e-09	15.0926	FBgn0039629	CG11842	CG11842	CG11842	43431	4252 // serine-type endopeptidase activity // inferred from sequence or structural similarity /// 4263 // chymotrypsin activity // inferred from electronic annotation /// 4295 // trypsin activity // non-traceable author statement /// 4252 // serine-type endopeptidase activity // inferred from electronic annotation /// 8233 // peptidase activity // inferred from electronic annotation /// 16787 // …	6508 // proteolysis // non-traceable author statement /// 6508 // proteolysis // inferred from electronic annotation	---	IPR001254 // Peptidase S1, chymotrypsin // 3.5E-49
13221	154420_at	0.920209	2.76475	9.70987	5.54804e-11	8.44859e-09	15.1032	FBgn0005771	CG4491	noc	no ocelli	34847	3676 // nucleic acid binding // inferred from electronic annotation /// 3702 // RNA polymerase II transcription factor activity // inferred from sequence or structural similarity /// 8270 // zinc ion binding // inferred from electronic annotation /// 5515 // protein binding // inferred from physical interaction /// 3702 // RNA polymerase II transcription factor activity // inferred from sequence …	6357 // regulation of transcription from RNA polymerase II promoter // inferred from sequence or structural similarity /// 7424 // tracheal system development (sensu Insecta) // inferred from mutant phenotype /// 6357 // regulation of transcription from RNA polymerase II promoter // inferred from sequence similarity	5634 // nucleus // inferred from sequence or structural similarity /// 5634 // nucleus // inferred from electronic annotation /// 5634 // nucleus // inferred from sequence similarity	---
2952	144151_at	0.992999	2.82446	9.67917	5.98231e-11	8.73128e-09	15.029	FBgn0026630	CG9655	nes	nessy	40093	---	---	5886 // plasma membrane // non-traceable author statement	IPR004299 // Membrane bound O-acyl transferase, MBOAT // 1.0E-84
3497	144696_at	0.583857	0.334121	9.68103	5.95504e-11	8.73128e-09	15.0335	---	---	---	---	---	---	---	---	---
7914	149113_at	0.741306	2.55808	9.65287	6.38186e-11	9.02146e-09	14.9653	FBgn0036967	CG6597	CG6597	CG6597	40231	---	---	---	IPR005176 // Protein of unknown function DUF298 // 2.9E-64
3723	144922_at	0.575729	-0.107607	9.50258	9.2505e-11	1.16756e-08	14.5994	FBgn0030375	CG11356	CG11356	CG11356	32178	---	---	---	---
5761	146960_at	0.787092	2.1015	9.47871	9.81489e-11	1.22041e-08	14.541	FBgn0033543	CG12338	CG12338	CG12338	36128	3884 // D-amino-acid oxidase activity // inferred from electronic annotation /// 8445 // D-aspartate oxidase activity // inferred from sequence or structural similarity /// 16491 // oxidoreductase activity // inferred from electronic annotation /// 8445 // D-aspartate oxidase activity // inferred from sequence similarity	6118 // electron transport // inferred from electronic annotation /// 6520 // amino acid metabolism // inferred from electronic annotation	---	IPR006076 // FAD dependent oxidoreductase // 7.4E-45
13622	154821_at	1.4095	0.229926	9.47754	9.84339e-11	1.22041e-08	14.5381	FBgn0043791	CG8147	CG8147	CG8147	41135	4035 // alkaline phosphatase activity // inferred from sequence or structural similarity /// 19204 // nucleotide phosphatase activity // inferred from electronic annotation /// 287 // magnesium ion binding // inferred from electronic annotation /// 8270 // zinc ion binding // inferred from electronic annotation /// 16787 // hydrolase activity // inferred from electronic annotation /// 4035 // alk…	1501 // skeletal development // inferred from electronic annotation /// 7498 // mesoderm development // inferred from electronic annotation /// 8152 // metabolism // inferred from electronic annotation	---	IPR001952 // Alkaline phosphatase // 1.6E-99
614	141813_at	0.483765	0.181539	9.46774	1.00859e-10	1.23951e-08	14.5141	FBgn0034923	CG11184	Upf3	Upf3	37792	---	6139 // nucleobase, nucleoside, nucleotide and nucleic acid metabolism // inferred from electronic annotation /// 6401 // RNA catabolism // inferred from electronic annotation	---	IPR005120 // Smg-4/UPF3 // 4.3E-38
10780	151979_at	0.724782	3.79898	9.36797	1.29317e-10	1.54849e-08	14.269	FBgn0019960	CG6455	CG6455	CG6455	42587	---	---	5743 // mitochondrial inner membrane // inferred from sequence or structural similarity /// 5739 // mitochondrion // inferred from electronic annotation /// 16020 // membrane // inferred from electronic annotation /// 16021 // integral to membrane // inferred from electronic annotation /// 5743 // mitochondrial inner membrane // inferred from sequence similarity	---
1052	142251_at	0.639428	3.87777	9.34045	1.38522e-10	1.64466e-08	14.2012	FBgn0000721	CG10033	for	foraging	44817	4674 // protein serine/threonine kinase activity // non-traceable author statement /// 4690 // cyclic nucleotide-dependent protein kinase activity // inferred from sequence or structural similarity /// 4692 // cGMP-dependent protein kinase activity // inferred from direct assay /// 4692 // cGMP-dependent protein kinase activity // non-traceable author statement /// 4702 // receptor signaling prot…	6468 // protein amino acid phosphorylation // inferred from direct assay /// 6468 // protein amino acid phosphorylation // non-traceable author statement /// 6936 // muscle contraction // inferred from electronic annotation /// 7010 // cytoskeleton organization and biogenesis // inferred from electronic annotation /// 7242 // intracellular signaling cascade // inferred from electronic annotation …	5886 // plasma membrane // inferred from direct assay /// 5952 // cAMP-dependent protein kinase complex // inferred from electronic annotation	IPR000719 // Protein kinase // 2.4E-84 /// IPR000595 // Cyclic nucleotide-binding domain // 1.2E-24 /// IPR000595 // Cyclic nucleotide-binding domain // 3.2E-28 /// IPR000961 // Protein kinase C-terminal domain // 9.0E-4 /// IPR000719 // Protein kinase // 2.4E-84 /// IPR000595 // Cyclic nucleotide-binding domain // 2.9E-14 /// IPR000595 // Cyclic nucleotide-binding domain // 3.2E-28 /// IPR000961…
6382	147581_at	0.512701	0.144477	9.31365	1.48132e-10	1.72945e-08	14.135	FBgn0050295	CG30295	Ipk1	Ipk1	37360	35299 // inositol pentakisphosphate 2-kinase activity // inferred from mutant phenotype /// 166 // nucleotide binding // inferred from electronic annotation /// 5524 // ATP binding // inferred from electronic annotation /// 16301 // kinase activity // inferred from electronic annotation /// 16740 // transferase activity // inferred from electronic annotation	46853 // inositol and derivative phosphorylation // inferred from mutant phenotype	5634 // nucleus // inferred from electronic annotation	IPR009286 // Protein of unknown function DUF941 // 1.0E-126
9124	150323_at	0.527947	0.053368	9.2896	1.57336e-10	1.82171e-08	14.0755	FBgn0038900	CG13420	CG13420	CG13420	42559	---	---	---	---
8656	149855_at	0.684605	1.74254	9.27998	1.61179e-10	1.85092e-08	14.0517	FBgn0038172	CG9621	Adgf-D	Adenosine deaminase-related growth factor D	41679	4000 // adenosine deaminase activity // inferred from direct assay /// 8083 // growth factor activity // inferred from direct assay /// 19239 // deaminase activity // inferred from electronic annotation	8283 // cell proliferation // inferred from direct assay /// 9168 // purine ribonucleoside monophosphate biosynthesis // inferred from electronic annotation	5615 // extracellular space // non-traceable author statement	IPR001365 // Adenosine/AMP deaminase // 1.3E-47
12951	154150_at	1.0607	4.67215	9.25665	1.70904e-10	1.93094e-08	13.9939	FBgn0001124	CG8430	Got1	Glutamate oxaloacetate transaminase 1	36782	4069 // aspartate transaminase activity // inferred from direct assay /// 4069 // aspartate transaminase activity // inferred from sequence or structural similarity /// 8483 // transaminase activity // inferred from electronic annotation /// 16740 // transferase activity // inferred from electronic annotation /// 16769 // transferase activity, transferring nitrogenous groups // inferred from elec…	6531 // aspartate metabolism // inferred from sequence or structural similarity /// 6537 // glutamate biosynthesis // traceable author statement /// 6520 // amino acid metabolism // inferred from electronic annotation /// 9058 // biosynthesis // inferred from electronic annotation /// 6531 // aspartate metabolism // inferred from sequence similarity	5759 // mitochondrial matrix // inferred from sequence or structural similarity /// 5759 // mitochondrial matrix // inferred from sequence similarity	IPR004839 // Aminotransferase, class I and II // 2.1E-90 /// IPR004839 // Aminotransferase, class I and II // 2.1E-90
10059	151258_at	0.626579	-0.198619	9.11716	2.42937e-10	2.61796e-08	13.6468	FBgn0053255	CG33255	CG33255	CG33255	2768959	---	---	---	---
11226	152425_at	1.07107	3.04706	9.11415	2.44791e-10	2.61796e-08	13.6393	FBgn0033079	CG3174	Fmo-2	Flavin-containing monooxygenase 2	35561	4497 // monooxygenase activity // inferred from direct assay /// 4499 // dimethylaniline monooxygenase (N-oxide-forming) activity // inferred from sequence or structural similarity /// 4499 // dimethylaniline monooxygenase (N-oxide-forming) activity // non-traceable author statement /// 15036 // disulfide oxidoreductase activity // inferred from electronic annotation /// 5515 // protein binding /…	6118 // electron transport // inferred from electronic annotation /// 6520 // amino acid metabolism // inferred from electronic annotation	5739 // mitochondrion // inferred from direct assay /// 5792 // microsome // inferred from direct assay /// 5829 // cytosol // inferred from direct assay	IPR000960 // Flavin-containing monooxygenase FMO // 6.1E-34
12504	153703_at	1.28256	4.35513	9.10593	2.49938e-10	2.65275e-08	13.6188	FBgn0000575	CG1007	emc	extra macrochaetae	38091	3714 // transcription corepressor activity // inferred from sequence or structural similarity /// 3714 // transcription corepressor activity // non-traceable author statement /// 5515 // protein binding // non-traceable author statement /// 5515 // protein binding // inferred from physical interaction /// 30528 // transcription regulator activity // inferred from electronic annotation /// 3714 //…	122 // negative regulation of transcription from RNA polymerase II promoter // traceable author statement /// 7286 // spermatid development // inferred from mutant phenotype /// 7399 // nervous system development // non-traceable author statement /// 7422 // peripheral nervous system development // inferred from mutant phenotype /// 7423 // sensory organ development // non-traceable author statem…	5634 // nucleus // inferred from sequence or structural similarity /// 5634 // nucleus // non-traceable author statement /// 5634 // nucleus // inferred from electronic annotation /// 5634 // nucleus // inferred from sequence similarity	IPR001092 // Basic helix-loop-helix dimerization domain bHLH // 6.0E-9
13027	154226_at	0.647209	4.15574	9.04756	2.8981e-10	2.96367e-08	13.4727	FBgn0011760	CG6998	ctp	cut up	31405	3777 // microtubule motor activity // non-traceable author statement /// 5200 // structural constituent of cytoskeleton // inferred from electronic annotation /// 42623 // ATPase activity, coupled // inferred from sequence or structural similarity /// 5515 // protein binding // inferred from physical interaction /// 3774 // motor activity // inferred from electronic annotation /// 3777 // microtu…	6403 // RNA localization // inferred from electronic annotation /// 6886 // intracellular protein transport // inferred from electronic annotation /// 7018 // microtubule-based movement // inferred from sequence or structural similarity /// 7049 // cell cycle // inferred from electronic annotation /// 7283 // spermatogenesis // inferred from mutant phenotype /// 7476 // wing morphogenesis // infe…	5856 // cytoskeleton // non-traceable author statement /// 5868 // cytoplasmic dynein complex // inferred from sequence or structural similarity /// 5868 // cytoplasmic dynein complex // non-traceable author statement /// 30286 // dynein complex // inferred from sequence or structural similarity /// 5874 // microtubule // inferred from electronic annotation /// 5875 // microtubule associated comp…	IPR001372 // Dynein light chain, type 1 // 1.6E-67
10701	151900_at	0.706894	1.36992	9.03518	2.99068e-10	3.01435e-08	13.4416	FBgn0027599	CG2790	CG2790	CG2790	37992	3676 // nucleic acid binding // inferred from electronic annotation /// 5198 // structural molecule activity // inferred from electronic annotation /// 8270 // zinc ion binding // inferred from electronic annotation /// 42623 // ATPase activity, coupled // inferred from electronic annotation /// 31072 // heat shock protein binding // inferred from electronic annotation /// 51082 // unfolded prote…	6457 // protein folding // inferred from electronic annotation	5634 // nucleus // inferred from electronic annotation	IPR001623 // Heat shock protein DnaJ, N-terminal // 3.7E-33
2962	144161_r_at	0.69336	4.95237	9.01071	3.18274e-10	3.16242e-08	13.3802	FBgn0011227	CG8764	ox	oxen	45401	8121 // ubiquinol-cytochrome-c reductase activity // inferred from sequence or structural similarity /// 8121 // ubiquinol-cytochrome-c reductase activity // non-traceable author statement /// 8121 // ubiquinol-cytochrome-c reductase activity // inferred from electronic annotation /// 8121 // ubiquinol-cytochrome-c reductase activity // inferred from sequence similarity	6122 // mitochondrial electron transport, ubiquinol to cytochrome c // inferred from sequence or structural similarity /// 7286 // spermatid development // inferred from mutant phenotype /// 6122 // mitochondrial electron transport, ubiquinol to cytochrome c // inferred from electronic annotation /// 6122 // mitochondrial electron transport, ubiquinol to cytochrome c // inferred from sequence sim…	5750 // respiratory chain complex III (sensu Eukaryota) // inferred from sequence or structural similarity /// 5750 // respiratory chain complex III (sensu Eukaryota) // non-traceable author statement /// 5740 // mitochondrial envelope // inferred from electronic annotation /// 5750 // respiratory chain complex III (sensu Eukaryota) // inferred from sequence similarity	IPR008027 // Ubiquinol-cytochrome C reductase, UQCRXQCR9 like // 2.3E-32 /// IPR008027 // Ubiquinol-cytochrome C reductase, UQCRXQCR9 like // 5.4E-33
2839	144038_at	1.01533	1.76611	8.97749	3.46365e-10	3.4173e-08	13.2966	FBgn0024963	CG7535	GluCl	GluCl	---	8068 // glutamate-gated chloride channel activity // inferred from direct assay /// 4872 // receptor activity // inferred from electronic annotation /// 4890 // GABA-A receptor activity // inferred from electronic annotation /// 5216 // ion channel activity // inferred from electronic annotation /// 5230 // extracellular ligand-gated ion channel activity // inferred from electronic annotation ///…	6821 // chloride transport // inferred from direct assay /// 6810 // transport // inferred from electronic annotation /// 6811 // ion transport // inferred from electronic annotation	16020 // membrane // inferred from electronic annotation /// 16021 // integral to membrane // inferred from electronic annotation /// 45211 // postsynaptic membrane // inferred from electronic annotation	IPR006029 // Neurotransmitter-gated ion-channel transmembrane region // 2.4E-33 /// IPR006029 // Neurotransmitter-gated ion-channel transmembrane region // 2.0E-7 /// IPR006202 // Neurotransmitter-gated ion-channel ligand binding domain // 2.7E-65
6901	148100_at	0.412118	-0.132143	8.94888	3.72587e-10	3.65031e-08	13.2246	FBgn0035429	CG12017	CG12017	CG12017	38404	---	---	---	---
13636	154835_at	0.476508	1.28817	8.91557	4.05683e-10	3.84029e-08	13.1405	FBgn0024698	CG10110	cpsf	cleavage and polyadenylation specificity factor	44250	3729 // mRNA binding // non-traceable author statement /// 3730 // mRNA 3'-UTR binding // inferred from sequence or structural similarity /// 8143 // poly(A) binding // inferred from electronic annotation /// 3676 // nucleic acid binding // inferred from electronic annotation /// 3723 // RNA binding // inferred from electronic annotation /// 3730 // mRNA 3'-UTR binding // inferred from sequence s…	6378 // mRNA polyadenylylation // inferred from sequence or structural similarity /// 6378 // mRNA polyadenylylation // non-traceable author statement /// 6379 // mRNA cleavage // inferred from sequence or structural similarity /// 6379 // mRNA cleavage // non-traceable author statement /// 6397 // mRNA processing // inferred from electronic annotation /// 6378 // mRNA polyadenylylation // inferr…	5847 // mRNA cleavage and polyadenylation specificity factor complex // inferred from sequence or structural similarity /// 5847 // mRNA cleavage and polyadenylation specificity factor complex // non-traceable author statement /// 5634 // nucleus // inferred from electronic annotation /// 5847 // mRNA cleavage and polyadenylation specificity factor complex // inferred from sequence similarity	IPR004871 // CPSF A subunit, C-terminal // 1.0E-126 /// IPR004871 // CPSF A subunit, C-terminal // 1.0E-126 /// IPR004871 // CPSF A subunit, C-terminal // 1.0E-126
10312	151511_r_at	0.849235	2.8947	8.87995	4.44401e-10	4.17857e-08	13.0505	FBgn0020306	CG9696	dom	domino	45655	3676 // nucleic acid binding // inferred from electronic annotation /// 3677 // DNA binding // inferred from electronic annotation /// 3678 // DNA helicase activity // inferred from electronic annotation /// 3910 // DNA ligase (ATP) activity // inferred from electronic annotation /// 3918 // DNA topoisomerase (ATP-hydrolyzing) activity // inferred from electronic annotation /// 4386 // helicase a…	381 // regulation of alternative nuclear mRNA splicing, via spliceosome // inferred from mutant phenotype /// 2165 // larval or pupal development (sensu Insecta) // inferred from mutant phenotype /// 6260 // DNA replication // inferred from electronic annotation /// 6265 // DNA topological change // inferred from electronic annotation /// 6281 // DNA repair // inferred from electronic annotation …	5634 // nucleus // Unknown /// 5634 // nucleus // inferred from direct assay /// 16585 // chromatin remodeling complex // inferred from sequence or structural similarity /// 5634 // nucleus // inferred from curator /// 16585 // chromatin remodeling complex // inferred from sequence similarity	IPR000330 // SNF2 related domain // 3.7E-104 /// IPR001650 // Helicase, C-terminal // 9.1E-28
3644	144843_at	0.422836	0.594073	8.87657	4.48269e-10	4.18683e-08	13.0419	FBgn0030259	CG1545	CG1545	CG1545	32036	---	---	---	---
7829	149028_at	0.454531	-0.2907	8.85006	4.79786e-10	4.39333e-08	12.9748	FBgn0002945	CG11614	nkd	naked cuticle	44843	---	7222 // frizzled signaling pathway // non-traceable author statement	---	---
11502	152701_at	1.08917	2.16461	8.85259	4.76682e-10	4.39333e-08	12.9812	FBgn0038865	CG10824	CG10824	CG10824	42512	4190 // aspartic-type endopeptidase activity // inferred from electronic annotation /// 4872 // receptor activity // inferred from electronic annotation	6508 // proteolysis // inferred from electronic annotation /// 6952 // defense response // inferred from electronic annotation /// 7155 // cell adhesion // inferred from electronic annotation /// 7165 // signal transduction // inferred from electronic annotation /// 7166 // cell surface receptor linked signal transduction // inferred from electronic annotation /// 19226 // transmission of nerve i…	---	IPR001611 // Leucine-rich repeat // 0.17 /// IPR001611 // Leucine-rich repeat // 0.0061 /// IPR001611 // Leucine-rich repeat // 0.0016 /// IPR001611 // Leucine-rich repeat // 0.0099 /// IPR001611 // Leucine-rich repeat // 0.071 /// IPR001611 // Leucine-rich repeat // 0.023 /// IPR001611 // Leucine-rich repeat // 1.2E-6
11613	152812_at	0.520776	0.00611039	8.83768	4.95277e-10	4.45622e-08	12.9434	FBgn0037663	CG9746	CG9746	CG9746	41096	4674 // protein serine/threonine kinase activity // inferred from sequence or structural similarity /// 5524 // ATP binding // inferred from electronic annotation /// 166 // nucleotide binding // inferred from electronic annotation /// 4672 // protein kinase activity // inferred from electronic annotation /// 4674 // protein serine/threonine kinase activity // inferred from electronic annotation …	6468 // protein amino acid phosphorylation // inferred from electronic annotation /// 6886 // intracellular protein transport // inferred from electronic annotation /// 7041 // lysosomal transport // inferred from electronic annotation	---	IPR000719 // Protein kinase // 1.0E-9 /// IPR001680 // G-protein beta WD-40 repeat // 1.9E-8 /// IPR001680 // G-protein beta WD-40 repeat // 1.0 /// IPR001680 // G-protein beta WD-40 repeat // 0.47 /// IPR001680 // G-protein beta WD-40 repeat // 5.6E-4 /// IPR001680 // G-protein beta WD-40 repeat // 0.0011
9561	150760_at	0.692498	0.167147	8.82842	5.07199e-10	4.52602e-08	12.9199	FBgn0039564	CG5527	CG5527	CG5527	43356	4245 // neprilysin activity // inferred from electronic annotation /// 8270 // zinc ion binding // inferred from electronic annotation /// 16511 // endothelin-converting enzyme activity // inferred from sequence or structural similarity /// 8233 // peptidase activity // inferred from electronic annotation /// 8237 // metallopeptidase activity // inferred from electronic annotation /// 16787 // hy…	6508 // proteolysis // inferred from electronic annotation /// 7165 // signal transduction // inferred from electronic annotation	16020 // membrane // inferred from electronic annotation	IPR008753 // Peptidase M13 // 1.2E-7 /// IPR008753 // Peptidase M13 // 1.3E-13 /// IPR000718 // Peptidase M13, neprilysin // 1.2E-51
3959	145158_at	0.446219	0.689431	8.82104	5.169e-10	4.5834e-08	12.9012	FBgn0030700	CG15914	CG15914	CG15914	32542	---	---	---	---
11094	152293_at	0.620552	1.42412	8.72348	6.6455e-10	5.57506e-08	12.653	FBgn0039228	CG6980	CG6980	CG6980	42955	5488 // binding // inferred from electronic annotation	---	---	IPR001440 // TPR repeat // 0.0029 /// IPR001440 // TPR repeat // 6.7E-7
5300	146499_at	0.478127	0.500742	8.6444	8.15414e-10	6.63324e-08	12.4508	FBgn0040268	CG10123	Top3	Topoisomerase 3	35236	3676 // nucleic acid binding // inferred from electronic annotation /// 3916 // DNA topoisomerase activity // inferred from direct assay /// 3917 // DNA topoisomerase type I activity // inferred from sequence or structural similarity /// 3917 // DNA topoisomerase type I activity // non-traceable author statement /// 3677 // DNA binding // inferred from electronic annotation /// 3916 // DNA topois…	6259 // DNA metabolism // inferred from electronic annotation /// 6265 // DNA topological change // inferred from electronic annotation /// 6268 // DNA unwinding during replication // inferred from electronic annotation /// 6304 // DNA modification // inferred from electronic annotation	5694 // chromosome // inferred from electronic annotation	IPR000380 // DNA topoisomerase I // 5.3E-113 /// IPR000380 // DNA topoisomerase I // 9.6E-12 /// IPR006171 // TOPRIM // 2.4E-14 /// IPR010666 // GRF zinc finger // 8.2E-24 /// IPR010666 // GRF zinc finger // 1.2E-25
10732	151931_at	0.735918	4.93367	8.63991	8.24967e-10	6.63324e-08	12.4393	FBgn0015795	CG5915	Rab7	Rab-protein 7	42841	3924 // GTPase activity // inferred from sequence or structural similarity /// 3924 // GTPase activity // non-traceable author statement /// 5525 // GTP binding // inferred from electronic annotation /// 166 // nucleotide binding // inferred from electronic annotation /// 3924 // GTPase activity // inferred from sequence similarity	6886 // intracellular protein transport // inferred from electronic annotation /// 6898 // receptor mediated endocytosis // inferred from electronic annotation /// 7165 // signal transduction // inferred from electronic annotation /// 7264 // small GTPase mediated signal transduction // inferred from electronic annotation /// 8333 // endosome to lysosome transport // inferred from genetic interac…	5770 // late endosome // inferred from direct assay /// 16020 // membrane // inferred from electronic annotation	IPR001806 // Ras GTPase superfamily // 4.4E-87
450	141649_at	0.532677	0.692115	8.63012	8.4618e-10	6.6601e-08	12.4142	FBgn0051110	CG31110	CG31110	CG31110	326119	46030 // inositol trisphosphate phosphatase activity // inferred from sequence or structural similarity /// 46030 // inositol trisphosphate phosphatase activity // non-traceable author statement /// 4437 // inositol or phosphatidylinositol phosphatase activity // inferred from electronic annotation /// 46030 // inositol trisphosphate phosphatase activity // inferred from sequence similarity	16311 // dephosphorylation // non-traceable author statement /// 19226 // transmission of nerve impulse // inferred from electronic annotation	---	IPR005135 // Endonuclease/exonuclease/phosphatase // 3.5E-13
9431	150630_at	0.355696	0.721866	8.61444	8.81308e-10	6.82162e-08	12.374	FBgn0051090	CG31090	CG31090	CG31090	43136	8324 // cation transporter activity // inferred from electronic annotation /// 8523 // sodium-dependent multivitamin transporter activity // inferred from sequence or structural similarity /// 5515 // protein binding // inferred from physical interaction /// 5215 // transporter activity // inferred from electronic annotation /// 8523 // sodium-dependent multivitamin transporter activity // inferr…	6520 // amino acid metabolism // inferred from electronic annotation /// 6732 // coenzyme metabolism // inferred from electronic annotation /// 6812 // cation transport // inferred from electronic annotation /// 6858 // extracellular transport // inferred from electronic annotation /// 6865 // amino acid transport // inferred from electronic annotation /// 51180 // vitamin transport // inferred f…	16021 // integral to membrane // inferred from sequence or structural similarity /// 16020 // membrane // inferred from electronic annotation /// 16021 // integral to membrane // inferred from electronic annotation /// 16021 // integral to membrane // inferred from sequence similarity	IPR001734 // Na+/solute symporter // 2.3E-8
5891	147090_at	0.565326	0.549136	8.59654	9.2326e-10	7.02982e-08	12.328	FBgn0050050	CG30050	CG30050	CG30050	246417	---	---	---	---
13754	154953_at	0.475689	0.431234	8.59025	9.38455e-10	7.10689e-08	12.3119	FBgn0028529	CG7516	CG7516	CG7516	34839	5515 // protein binding // inferred from physical interaction	---	5634 // nucleus // inferred from electronic annotation	---
3446	144645_at	0.506102	-0.181607	8.56182	1.01048e-09	7.45099e-08	12.2388	FBgn0029944	CG2079	l(1)G0331	lethal (1) G0331	31667	5158 // insulin receptor binding // inferred from electronic annotation /// 5515 // protein binding // inferred from physical interaction	---	---	IPR002404 // Insulin receptor substrate-1, PTB // 6.3E-14 /// IPR001849 // Pleckstrin-like // 2.5E-9
5578	146777_at	0.737025	1.77554	8.54076	1.06745e-09	7.78902e-08	12.1846	FBgn0033238	CG11165	CG11165	CG11165	35751	5509 // calcium ion binding // inferred from sequence or structural similarity /// 5516 // calmodulin binding // inferred from electronic annotation /// 5515 // protein binding // inferred from physical interaction /// 5509 // calcium ion binding // inferred from electronic annotation /// 5509 // calcium ion binding // inferred from sequence similarity	6936 // muscle contraction // inferred from electronic annotation /// 19722 // calcium-mediated signaling // inferred from electronic annotation	---	IPR002048 // Calcium-binding EF-hand // 0.0013 /// IPR002048 // Calcium-binding EF-hand // 0.015 /// IPR002048 // Calcium-binding EF-hand // 3.6E-9 /// IPR002048 // Calcium-binding EF-hand // 7.0E-8
277	141476_at	0.481205	1.59954	8.5303	1.09695e-09	7.92178e-08	12.1577	FBgn0033905	CG18324	CG18324	CG18324	36568	5386 // carrier activity // inferred from sequence or structural similarity /// 5488 // binding // inferred from electronic annotation /// 5215 // transporter activity // inferred from electronic annotation /// 5386 // carrier activity // inferred from sequence similarity	6810 // transport // inferred from electronic annotation	5740 // mitochondrial envelope // inferred from sequence or structural similarity /// 5743 // mitochondrial inner membrane // inferred from electronic annotation /// 16020 // membrane // inferred from electronic annotation /// 16021 // integral to membrane // inferred from electronic annotation /// 5740 // mitochondrial envelope // inferred from sequence similarity	IPR001993 // Mitochondrial substrate carrier // 1.1E-15 /// IPR001993 // Mitochondrial substrate carrier // 2.9E-13 /// IPR001993 // Mitochondrial substrate carrier // 1.5E-26 /// IPR001993 // Mitochondrial substrate carrier // 2.7E-10 /// IPR001993 // Mitochondrial substrate carrier // 1.5E-26
12639	153838_at	0.52528	0.538559	8.52449	1.11369e-09	7.97593e-08	12.1427	FBgn0032908	CG9270	CG9270	CG9270	35366	166 // nucleotide binding // inferred from electronic annotation /// 5215 // transporter activity // inferred from sequence or structural similarity /// 5524 // ATP binding // inferred from electronic annotation /// 8559 // xenobiotic-transporting ATPase activity // inferred from sequence or structural similarity /// 42626 // ATPase activity, coupled to transmembrane movement of substances // inf…	6858 // extracellular transport // inferred from electronic annotation /// 6952 // defense response // inferred from electronic annotation /// 9636 // response to toxin // inferred from electronic annotation /// 6810 // transport // inferred from electronic annotation	16021 // integral to membrane // inferred from electronic annotation /// 43190 // ATP-binding cassette (ABC) transporter complex // inferred from sequence or structural similarity /// 16020 // membrane // inferred from electronic annotation /// 43190 // ATP-binding cassette (ABC) transporter complex // inferred from sequence similarity	IPR001140 // ABC transporter, transmembrane region // 4.8E-15 /// IPR001140 // ABC transporter, transmembrane region // 3.0E-19 /// IPR003439 // ABC transporter // 2.4E-45 /// IPR003439 // ABC transporter // 1.8E-48 /// IPR001140 // ABC transporter, transmembrane region // 1.5E-15 /// IPR001140 // ABC transporter, transmembrane region // 3.0E-19 /// IPR003439 // ABC transporter // 2.4E-45 /// IPR…
12714	153913_at	0.696354	2.84411	8.52376	1.11583e-09	7.97593e-08	12.1408	FBgn0029996	CG2257	Ubc-E2H	Ubc-E2H	31728	4840 // ubiquitin conjugating enzyme activity // inferred from sequence or structural similarity /// 16874 // ligase activity // inferred from electronic annotation /// 5515 // protein binding // inferred from physical interaction /// 4842 // ubiquitin-protein ligase activity // inferred from electronic annotation /// 4840 // ubiquitin conjugating enzyme activity // inferred from sequence similar…	6464 // protein modification // inferred from electronic annotation /// 6512 // ubiquitin cycle // inferred from electronic annotation /// 19538 // protein metabolism // inferred from electronic annotation	---	IPR000608 // Ubiquitin-conjugating enzymes // 1.1E-51
2517	143716_at	0.839422	2.99867	8.51178	1.15125e-09	8.18732e-08	12.1099	FBgn0013750	CG8156	Arf51F	ADP ribosylation factor 51F	36699	3924 // GTPase activity // inferred from sequence or structural similarity /// 3924 // GTPase activity // non-traceable author statement /// 3956 // NAD(P)+-protein-arginine ADP-ribosyltransferase activity // inferred from direct assay /// 5525 // GTP binding // inferred from sequence or structural similarity /// 5525 // GTP binding // non-traceable author statement /// 166 // nucleotide binding …	6471 // protein amino acid ADP-ribosylation // inferred from direct assay /// 6471 // protein amino acid ADP-ribosylation // inferred from sequence or structural similarity /// 6471 // protein amino acid ADP-ribosylation // non-traceable author statement /// 6886 // intracellular protein transport // inferred from electronic annotation /// 7166 // cell surface receptor linked signal transduction …	5622 // intracellular // inferred from electronic annotation /// 5795 // Golgi stack // inferred from electronic annotation	IPR006689 // ARF/SAR superfamily // 1.1E-123 /// IPR006689 // ARF/SAR superfamily // 1.1E-120
12206	153405_at	0.946	2.29313	8.46739	1.29278e-09	8.92207e-08	11.9953	FBgn0051778	CG31778	CG31778	CG31778	261616	4867 // serine-type endopeptidase inhibitor activity // inferred from electronic annotation	---	---	---
57	141256_at	0.687889	1.02833	8.43131	1.42081e-09	9.44205e-08	11.9019	FBgn0004698	CG8153	mus210	mutagen-sensitive 210	36697	3684 // damaged DNA binding // inferred from sequence or structural similarity /// 3677 // DNA binding // inferred from electronic annotation /// 3684 // damaged DNA binding // inferred from electronic annotation /// 3684 // damaged DNA binding // inferred from sequence similarity	6289 // nucleotide-excision repair // inferred from sequence or structural similarity /// 6281 // DNA repair // inferred from electronic annotation /// 6289 // nucleotide-excision repair // inferred from electronic annotation /// 6974 // response to DNA damage stimulus // inferred from electronic annotation /// 6289 // nucleotide-excision repair // inferred from sequence similarity	5634 // nucleus // non-traceable author statement /// 5634 // nucleus // inferred from electronic annotation	IPR004583 // DNA repair protein Rad4 // 1.0E-126 /// IPR004583 // DNA repair protein Rad4 // 1.0E-126 /// IPR004583 // DNA repair protein Rad4 // 1.0E-126
12589	153788_at	0.48275	1.47634	8.43066	1.42322e-09	9.44205e-08	11.9002	FBgn0031868	CG10354	CG10354	CG10354	33964	3676 // nucleic acid binding // inferred from electronic annotation /// 4534 // 5'-3' exoribonuclease activity // inferred from sequence or structural similarity /// 4527 // exonuclease activity // inferred from electronic annotation /// 4534 // 5'-3' exoribonuclease activity // inferred from sequence similarity	6139 // nucleobase, nucleoside, nucleotide and nucleic acid metabolism // inferred from electronic annotation /// 6259 // DNA metabolism // inferred from electronic annotation	5634 // nucleus // inferred from electronic annotation	IPR004859 // Putative 5-3 exonuclease domain // 1.0E-126
6011	147210_at	0.845461	3.01457	8.42594	1.44093e-09	9.4777e-08	11.888	FBgn0033945	CG12868	CG12868	CG12868	36620	---	---	---	---
6260	147459_at	1.25802	4.63721	8.41674	1.4761e-09	9.57414e-08	11.8642	FBgn0034382	CG18609	CG18609	CG18609	37158	8415 // acyltransferase activity // inferred from electronic annotation /// 16740 // transferase activity // inferred from electronic annotation	6629 // lipid metabolism // inferred from electronic annotation /// 6631 // fatty acid metabolism // inferred from electronic annotation	16021 // integral to membrane // inferred from electronic annotation	---
11579	152778_at	1.13886	2.57086	8.40962	1.50389e-09	9.63749e-08	11.8457	FBgn0039872	CG2196	CG2196	CG2196	43742	8324 // cation transporter activity // inferred from electronic annotation /// 8507 // sodium:iodide symporter activity // inferred from sequence or structural similarity /// 5215 // transporter activity // inferred from electronic annotation /// 8507 // sodium:iodide symporter activity // inferred from sequence similarity	6732 // coenzyme metabolism // inferred from electronic annotation /// 6812 // cation transport // inferred from electronic annotation /// 6858 // extracellular transport // inferred from electronic annotation /// 51189 // prosthetic group metabolism // inferred from electronic annotation /// 6810 // transport // inferred from electronic annotation	16020 // membrane // inferred from electronic annotation	---
2511	143710_at	0.45987	0.111772	8.36059	1.71052e-09	1.08436e-07	11.7184	FBgn0013433	CG4846	beat-Ia	beaten path Ia	34947	5515 // protein binding // inferred from physical interaction	1746 // Bolwig's organ morphogenesis // inferred from mutant phenotype /// 7415 // defasciculation of motor neuron // inferred from mutant phenotype /// 16198 // axon choice point recognition // traceable author statement	5576 // extracellular region // inferred from sequence or structural similarity /// 5576 // extracellular region // inferred from sequence similarity	IPR007110 // Immunoglobulin-like // 4.1E-5
546	141745_at	0.828599	4.50125	8.35672	1.72798e-09	1.08615e-07	11.7084	FBgn0032482 /// FBgn0068101	CG5547	Pect /// DyakPect	Phosphoethanolamine cytidylyltransferase /// Pect	34716	4306 // ethanolamine-phosphate cytidylyltransferase activity // inferred from sequence or structural similarity /// 16779 // nucleotidyltransferase activity // inferred from electronic annotation /// 4306 // ethanolamine-phosphate cytidylyltransferase activity // inferred from sequence similarity	6644 // phospholipid metabolism // inferred from electronic annotation /// 9058 // biosynthesis // inferred from electronic annotation /// 42439 // ethanolamine and derivative metabolism // non-traceable author statement	---	IPR004820 // Cytidylyltransferase // 5.3E-29 /// IPR004820 // Cytidylyltransferase // 1.3E-18 /// IPR004820 // Cytidylyltransferase // 1.3E-18 /// IPR004820 // Cytidylyltransferase // 1.3E-18 /// IPR004820 // Cytidylyltransferase // 1.3E-18
6103	147302_at	0.446264	0.311938	8.34059	1.8029e-09	1.12762e-07	11.6664	FBgn0034113	CG8060	CG8060	CG8060	36824	5515 // protein binding // inferred from electronic annotation	---	---	IPR002110 // Ankyrin // 2.6E-4 /// IPR002110 // Ankyrin // 1.3E-6 /// IPR000210 // BTB/POZ domain // 5.0E-13
10970	152169_at	0.631051	0.41798	8.31739	1.91641e-09	1.18277e-07	11.606	FBgn0036764	CG5535	CG5535	CG5535	39990	15326 // cationic amino acid transporter activity // inferred from sequence or structural similarity /// 5279 // amino acid-polyamine transporter activity // inferred from electronic annotation /// 15326 // cationic amino acid transporter activity // inferred from sequence similarity	6520 // amino acid metabolism // inferred from electronic annotation /// 6865 // amino acid transport // inferred from electronic annotation /// 6865 // amino acid transport // inferred from sequence or structural similarity /// 6810 // transport // inferred from electronic annotation /// 6865 // amino acid transport // inferred from sequence similarity	16020 // membrane // inferred from electronic annotation /// 16021 // integral to membrane // inferred from electronic annotation	IPR004841 // Amino acid permease-associated region // 5.8E-7 /// IPR004841 // Amino acid permease-associated region // 5.4E-13 /// IPR004841 // Amino acid permease-associated region // 5.8E-7 /// IPR004841 // Amino acid permease-associated region // 5.4E-13
5749	146948_at	0.623752	1.53304	8.31296	1.93894e-09	1.18622e-07	11.5945	FBgn0033523	CG12895	CG12895	CG12895	36103	---	---	---	IPR005631 // Protein of unknown function DUF339 // 2.9E-42
10280	151479_at	0.523398	2.81437	8.26791	2.18355e-09	1.30177e-07	11.477	FBgn0032976	CG6448	CG6448	CG6448	35442	---	---	---	---
2790	143989_at	0.526882	0.180884	8.26146	2.22106e-09	1.31295e-07	11.4601	FBgn0023509	CG3480	mip130	Myb-interacting protein 130	31153	3677 // DNA binding // inferred from direct assay /// 5515 // protein binding // inferred from physical interaction	122 // negative regulation of transcription from RNA polymerase II promoter // inferred from mutant phenotype /// 7307 // chorion gene amplification // Unknown /// 7307 // chorion gene amplification // inferred from curator	785 // chromatin // inferred from direct assay /// 5634 // nucleus // inferred from sequence or structural similarity /// 5634 // nucleus // non-traceable author statement /// 5737 // cytoplasm // non-traceable author statement /// 31523 // Myb complex // inferred from direct assay /// 5634 // nucleus // inferred from sequence similarity	IPR010561 // DIRP // 1.5E-73
296	141495_at	0.683821	3.85926	8.19867	2.62231e-09	1.51812e-07	11.2959	FBgn0004687	CG3201	Mlc-c	Myosin light chain cytoplasmic	31474	5200 // structural constituent of cytoskeleton // inferred from electronic annotation /// 5509 // calcium ion binding // inferred from electronic annotation /// 8092 // cytoskeletal protein binding // inferred from electronic annotation /// 42623 // ATPase activity, coupled // inferred from sequence or structural similarity /// 5515 // protein binding // inferred from physical interaction /// 377…	6936 // muscle contraction // inferred from electronic annotation	16459 // myosin // inferred from sequence or structural similarity /// 16461 // unconventional myosin // non-traceable author statement /// 16459 // myosin // inferred from electronic annotation /// 16459 // myosin // inferred from sequence similarity	IPR002048 // Calcium-binding EF-hand // 1.2E-4 /// IPR002048 // Calcium-binding EF-hand // 2.0E-5 /// IPR002048 // Calcium-binding EF-hand // 0.29
3416	144615_at	0.518864	0.872246	8.19873	2.62189e-09	1.51812e-07	11.296	FBgn0029502	CG14437	COQ7	COQ7	44007	---	6094 // gluconeogenesis // inferred from electronic annotation /// 6743 // ubiquinone metabolism // inferred from sequence or structural similarity /// 6744 // ubiquinone biosynthesis // inferred from electronic annotation /// 19538 // protein metabolism // inferred from electronic annotation /// 6743 // ubiquinone metabolism // inferred from sequence similarity	5743 // mitochondrial inner membrane // inferred from sequence or structural similarity /// 5743 // mitochondrial inner membrane // inferred from sequence similarity	IPR004916 // Ubiquinone biosyntheis protein COQ7 // 5.0E-54 /// IPR004916 // Ubiquinone biosyntheis protein COQ7 // 2.9E-44
11661	152860_at	0.472117	1.02988	8.1967	2.63601e-09	1.51977e-07	11.2907	FBgn0034191	CG6984	CG6984	CG6984	36926	4300 // enoyl-CoA hydratase activity // inferred from sequence or structural similarity /// 3824 // catalytic activity // inferred from electronic annotation /// 4300 // enoyl-CoA hydratase activity // inferred from sequence similarity	6635 // fatty acid beta-oxidation // inferred from electronic annotation /// 8152 // metabolism // inferred from electronic annotation	---	IPR001753 // Enoyl-CoA hydratase/isomerase // 3.1E-29
12085	153284_at	0.553862	0.502365	8.18603	2.71166e-09	1.54432e-07	11.2627	FBgn0038275	CG3817	CG3817	CG3817	41805	---	---	---	---
3432	144631_r_at	0.616329	-0.402129	8.15593	2.93701e-09	1.6459e-07	11.1838	FBgn0029920	CG4575	CG4575	CG4575	31637	3700 // transcription factor activity // inferred from sequence or structural similarity /// 42803 // protein homodimerization activity // inferred from sequence or structural similarity /// 3700 // transcription factor activity // inferred from sequence similarity /// 42803 // protein homodimerization activity // inferred from sequence similarity	6355 // regulation of transcription, DNA-dependent // inferred from electronic annotation /// 7379 // segment specification // inferred from electronic annotation	5634 // nucleus // inferred from sequence or structural similarity /// 5634 // nucleus // inferred from sequence similarity	---
586	141785_at	0.645857	2.1275	8.1491	2.99077e-09	1.66273e-07	11.1658	FBgn0034243	CG6501	Ngp	Ngp	36989	5102 // receptor binding // inferred from electronic annotation /// 5525 // GTP binding // non-traceable author statement /// 5525 // GTP binding // inferred from electronic annotation	6886 // intracellular protein transport // inferred from electronic annotation /// 7166 // cell surface receptor linked signal transduction // inferred from electronic annotation /// 7242 // intracellular signaling cascade // inferred from electronic annotation	5634 // nucleus // non-traceable author statement /// 5622 // intracellular // inferred from electronic annotation	IPR002917 // GTP-binding protein, HSR1-related // 4.8E-102
959	142158_at	0.622387	4.15881	8.12868	3.15748e-09	1.74159e-07	11.1122	FBgn0028662	CG7007	VhaPPA1-1	VhaPPA1-1	45247	8553 // hydrogen-exporting ATPase activity, phosphorylative mechanism // inferred from sequence or structural similarity /// 46933 // hydrogen-transporting ATP synthase activity, rotational mechanism // inferred from electronic annotation /// 46961 // hydrogen-transporting ATPase activity, rotational mechanism // inferred from electronic annotation /// 8553 // hydrogen-exporting ATPase activity, …	6812 // cation transport // inferred from electronic annotation /// 15986 // ATP synthesis coupled proton transport // inferred from electronic annotation	220 // hydrogen-transporting ATPase V0 domain // inferred from sequence or structural similarity /// 16469 // proton-transporting two-sector ATPase complex // inferred from electronic annotation /// 16020 // membrane // inferred from electronic annotation /// 16021 // integral to membrane // inferred from electronic annotation /// 220 // hydrogen-transporting ATPase V0 domain // inferred from seq…	IPR002379 // H+-transporting two-sector ATPase, C subunit // 3.3E-7
2398	143597_at	0.636297	3.79093	8.12086	3.22383e-09	1.77121e-07	11.0916	FBgn0010333	CG2248	Rac1	Rac1	38146	3924 // GTPase activity // inferred from sequence or structural similarity /// 3924 // GTPase activity // non-traceable author statement /// 3924 // GTPase activity // traceable author statement /// 5525 // GTP binding // inferred from electronic annotation /// 5515 // protein binding // inferred from physical interaction /// 166 // nucleotide binding // inferred from electronic annotation /// 39…	7017 // microtubule-based process // non-traceable author statement /// 7164 // establishment of tissue polarity // non-traceable author statement /// 7186 // G-protein coupled receptor protein signaling pathway // inferred from electronic annotation /// 7254 // JNK cascade // traceable author statement /// 7264 // small GTPase mediated signal transduction // inferred from electronic annotation /…	16028 // rhabdomere // inferred from direct assay /// 5622 // intracellular // inferred from electronic annotation /// 16020 // membrane // inferred from electronic annotation	IPR001806 // Ras GTPase superfamily // 6.3E-92
8844	150043_at	0.478394	0.197046	8.11741	3.25354e-09	1.77362e-07	11.0825	FBgn0038469	CG4009	CG4009	CG4009	42054	4601 // peroxidase activity // inferred from sequence or structural similarity /// 4601 // peroxidase activity // inferred from sequence similarity	6800 // oxygen and reactive oxygen species metabolism // inferred from electronic annotation /// 6952 // defense response // inferred from electronic annotation	---	IPR002007 // Animal haem peroxidase // 1.0E-126
765	141964_at	0.494161	0.419717	8.10817	3.33441e-09	1.78302e-07	11.0582	---	---	---	---	---	---	---	---	---
6163	147362_at	0.502624	0.19227	8.09514	3.45209e-09	1.83211e-07	11.0239	FBgn0034218	CG18467	CG18467	CG18467	36958	---	---	---	---
12792	153991_at	0.72899	2.0349	8.09511	3.45237e-09	1.83211e-07	11.0238	FBgn0031738	CG9171	CG9171	CG9171	33807	8109 // N-acetyllactosaminide beta-1,6-N-acetylglucosaminyltransferase activity // inferred from sequence or structural similarity /// 8109 // N-acetyllactosaminide beta-1,6-N-acetylglucosaminyltransferase activity // inferred from sequence similarity	---	---	---
631	141830_at	0.569361	0.677434	8.03209	4.08399e-09	2.12702e-07	10.8576	---	---	---	---	---	---	---	---	---
13188	154387_at	0.445379	3.06677	8.02682	4.14187e-09	2.14917e-07	10.8437	FBgn0027086	CG11471	Aats-ile	Isoleucyl-tRNA synthetase	45785	3729 // mRNA binding // inferred from electronic annotation /// 4822 // isoleucine-tRNA ligase activity // inferred from sequence or structural similarity /// 5524 // ATP binding // inferred from electronic annotation /// 4812 // aminoacyl-tRNA ligase activity // inferred from electronic annotation /// 4822 // isoleucine-tRNA ligase activity // inferred from electronic annotation /// 4822 // isol…	6428 // isoleucyl-tRNA aminoacylation // inferred from sequence or structural similarity /// 6418 // tRNA aminoacylation for protein translation // inferred from electronic annotation /// 6428 // isoleucyl-tRNA aminoacylation // inferred from electronic annotation /// 6428 // isoleucyl-tRNA aminoacylation // inferred from sequence similarity	---	IPR002300 // Aminoacyl-tRNA synthetase, class Ia // 1.0E-126
10318	151517_at	0.637088	1.50068	8.00217	4.42376e-09	2.27022e-07	10.7786	FBgn0015277	CG5373	Pi3K59F	Phosphotidylinositol 3 kinase 59F	37733	16303 // phosphatidylinositol 3-kinase activity // inferred from direct assay /// 16303 // phosphatidylinositol 3-kinase activity // inferred from sequence or structural similarity /// 35004 // phosphoinositide 3-kinase activity // non-traceable author statement /// 35005 // phosphatidylinositol-4-phosphate 3-kinase activity // inferred from direct assay /// 46934 // phosphatidylinositol-4,5-bisp…	6605 // protein targeting // inferred from electronic annotation /// 6897 // endocytosis // inferred from electronic annotation /// 46854 // phosphoinositide phosphorylation // inferred from direct assay /// 46854 // phosphoinositide phosphorylation // inferred from sequence or structural similarity /// 46854 // phosphoinositide phosphorylation // non-traceable author statement /// 46854 // phosp…	35032 // phosphoinositide 3-kinase complex, class III // non-traceable author statement /// 5942 // phosphoinositide 3-kinase complex // inferred from electronic annotation	IPR000403 // Phosphatidylinositol 3- and 4-kinase // 1.0E-86 /// IPR002420 // Phosphoinositide 3-kinase, C2 domain // 2.0E-62 /// IPR001263 // Phosphoinositide 3-kinase accessory domain PIK // 1.1E-66
11281	152480_at	0.566181	3.22924	7.99904	4.46096e-09	2.27724e-07	10.7703	FBgn0022097	CG8186	Vha36	Vha36	44702	8553 // hydrogen-exporting ATPase activity, phosphorylative mechanism // inferred from sequence or structural similarity /// 8553 // hydrogen-exporting ATPase activity, phosphorylative mechanism // non-traceable author statement /// 46933 // hydrogen-transporting ATP synthase activity, rotational mechanism // inferred from electronic annotation /// 46961 // hydrogen-transporting ATPase activity, …	6144 // purine base metabolism // inferred from electronic annotation /// 15986 // ATP synthesis coupled proton transport // inferred from electronic annotation /// 15992 // proton transport // inferred from sequence or structural similarity /// 6754 // ATP biosynthesis // inferred from electronic annotation /// 6810 // transport // inferred from electronic annotation /// 6811 // ion transport //…	221 // hydrogen-transporting ATPase V1 domain // inferred from sequence or structural similarity /// 221 // hydrogen-transporting ATPase V1 domain // non-traceable author statement /// 16469 // proton-transporting two-sector ATPase complex // inferred from electronic annotation /// 221 // hydrogen-transporting ATPase V1 domain // inferred from sequence similarity	IPR002699 // H+-transporting two-sector ATPase, D subunit // 9.9E-89
4560	145759_at	0.600378	0.636517	7.9637	4.9034e-09	2.46225e-07	10.6767	FBgn0031603	CG15432	CG15432	CG15432	33647	---	---	---	---
5440	146639_at	0.526236	2.60842	7.93874	5.24261e-09	2.59537e-07	10.6105	FBgn0033017	CG10465	CG10465	CG10465	35488	5249 // voltage-gated potassium channel activity // inferred from electronic annotation /// 5515 // protein binding // inferred from electronic annotation /// 5515 // protein binding // inferred from physical interaction /// 42802 // identical protein binding // inferred from physical interaction	6813 // potassium ion transport // inferred from electronic annotation	8076 // voltage-gated potassium channel complex // inferred from electronic annotation /// 16020 // membrane // inferred from electronic annotation	IPR003131 // K+ channel tetramerisation // 2.6E-30
13808	155007_at	0.644154	2.57262	7.93904	5.2385e-09	2.59537e-07	10.6113	FBgn0052428	CG32428	CG32428	CG32428	50105	---	---	---	---
13903	155102_at	0.433028	0.415239	7.91826	5.53875e-09	2.70376e-07	10.5562	FBgn0010905 /// FBgn0052295	CG16757	Spn /// CG32295	Spinophilin /// CG32295	317962 /// 46194	8157 // protein phosphatase 1 binding // inferred from sequence or structural similarity /// 5515 // protein binding // inferred from electronic annotation /// 8157 // protein phosphatase 1 binding // inferred from sequence similarity	---	---	IPR001478 // PDZ/DHR/GLGF domain // 2.5E-16 /// IPR001660 // Sterile alpha motif SAM // 4.9E-12
13859	155058_at	0.521264	0.3567	7.91165	5.63793e-09	2.7237e-07	10.5386	FBgn0034270	CG6401	CG6401	CG6401	37020	16757 // transferase activity, transferring glycosyl groups // inferred from sequence or structural similarity /// 17176 // phosphatidylinositol N-acetylglucosaminyltransferase activity // inferred from sequence or structural similarity /// 16757 // transferase activity, transferring glycosyl groups // inferred from sequence similarity /// 17176 // phosphatidylinositol N-acetylglucosaminyltransfe…	5976 // polysaccharide metabolism // inferred from electronic annotation /// 6506 // GPI anchor biosynthesis // inferred from sequence or structural similarity /// 9058 // biosynthesis // inferred from electronic annotation /// 6506 // GPI anchor biosynthesis // inferred from sequence similarity	30176 // integral to endoplasmic reticulum membrane // inferred from sequence or structural similarity /// 30176 // integral to endoplasmic reticulum membrane // inferred from sequence similarity	IPR001296 // Glycosyl transferase, group 1 // 5.5E-23
7453	148652_at	0.440561	-0.310015	7.90744	5.70194e-09	2.74516e-07	10.5274	FBgn0052105	CG32105	CG32105	CG32105	39406	3700 // transcription factor activity // inferred from sequence or structural similarity /// 8270 // zinc ion binding // inferred from electronic annotation /// 5515 // protein binding // inferred from physical interaction /// 3677 // DNA binding // inferred from electronic annotation /// 3700 // transcription factor activity // inferred from electronic annotation /// 43565 // sequence-specific D…	6357 // regulation of transcription from RNA polymerase II promoter // inferred from electronic annotation /// 45449 // regulation of transcription // inferred from sequence or structural similarity /// 6350 // transcription // inferred from electronic annotation /// 6355 // regulation of transcription, DNA-dependent // inferred from electronic annotation /// 7275 // development // inferred from …	5634 // nucleus // inferred from sequence or structural similarity /// 5634 // nucleus // inferred from electronic annotation /// 5634 // nucleus // inferred from sequence similarity	IPR001356 // Homeobox // 1.0E-23 /// IPR001781 // Zn-binding protein, LIM // 5.1E-18 /// IPR001781 // Zn-binding protein, LIM // 2.1E-14
2079	143278_at	0.435995	1.04421	7.90357	5.7615e-09	2.75783e-07	10.5172	---	CG13399 /// CG10890	---	---	---	14 // single-stranded DNA specific endodeoxyribonuclease activity // inferred from sequence or structural similarity /// 3677 // DNA binding // inferred from electronic annotation /// 46982 // protein heterodimerization activity // inferred from physical interaction /// 4518 // nuclease activity // inferred from electronic annotation /// 3697 // single-stranded DNA binding // inferred from electr…	6284 // base-excision repair // inferred from sequence or structural similarity /// 6289 // nucleotide-excision repair // non-traceable author statement /// 42766 // nucleosome mobilization // inferred from direct assay /// 6281 // DNA repair // inferred from electronic annotation /// 6289 // nucleotide-excision repair // inferred from electronic annotation	8623 // chromatin accessibility complex // inferred from direct assay /// 8623 // chromatin accessibility complex // inferred from physical interaction /// 8623 // chromatin accessibility complex // non-traceable author statement /// 8623 // chromatin accessibility complex // traceable author statement /// 5634 // nucleus // inferred from electronic annotation /// 5622 // intracellular // inferre…	IPR006086 // XPG I domain // 1.6E-38 /// IPR003903 // Ubiquitin interacting motif // 0.0033 /// IPR006085 // XPG N-terminal // 1.2E-40
12802	154001_at	0.85139	1.62831	7.89174	5.94758e-09	2.8342e-07	10.4857	FBgn0030607	CG5560	CG5560	CG5560	32436	---	6629 // lipid metabolism // inferred from electronic annotation	---	IPR002641 // Patatin // 2.4E-41
4609	145808_at	0.580827	5.30722	7.87862	6.16105e-09	2.91609e-07	10.4508	FBgn0028696	CG5827	RpL37A	Ribosomal protein L37A	44783	3676 // nucleic acid binding // inferred from electronic annotation /// 3735 // structural constituent of ribosome // inferred from sequence or structural similarity /// 5515 // protein binding // inferred from physical interaction /// 3735 // structural constituent of ribosome // inferred from electronic annotation /// 8270 // zinc ion binding // inferred from electronic annotation /// 46872 // …	6412 // protein biosynthesis // inferred from sequence or structural similarity /// 6412 // protein biosynthesis // inferred from electronic annotation /// 6412 // protein biosynthesis // inferred from sequence similarity	5842 // cytosolic large ribosomal subunit (sensu Eukaryota) // inferred from sequence or structural similarity /// 5622 // intracellular // inferred from electronic annotation /// 5840 // ribosome // inferred from electronic annotation /// 30529 // ribonucleoprotein complex // inferred from electronic annotation /// 5842 // cytosolic large ribosomal subunit (sensu Eukaryota) // inferred from sequ…	IPR002674 // Ribosomal L37ae protein // 3.6E-60
12669	153868_at	0.538928	2.29637	7.85691	6.53152e-09	3.05022e-07	10.393	FBgn0031268	CG2813	CG2813	CG2813	33237	5515 // protein binding // inferred from physical interaction	---	---	---
12972	154171_at	0.373101	0.393556	7.8546	6.57224e-09	3.05904e-07	10.3869	FBgn0024364	CG11417	CG11417	CG11417	31083	166 // nucleotide binding // inferred from electronic annotation	---	---	---
10015	151214_at	0.474645	-0.507874	7.85108	6.63489e-09	3.0602e-07	10.3775	---	---	---	---	---	---	---	---	---
5191	146390_at	0.68331	0.665996	7.84753	6.69858e-09	3.07695e-07	10.368	FBgn0032620	CG12288	CG12288	CG12288	35027	3729 // mRNA binding // inferred from sequence or structural similarity /// 8143 // poly(A) binding // inferred from sequence or structural similarity /// 166 // nucleotide binding // inferred from electronic annotation /// 3676 // nucleic acid binding // inferred from electronic annotation /// 3729 // mRNA binding // inferred from sequence similarity /// 8143 // poly(A) binding // inferred from …	---	---	IPR000504 // RNA-binding region RNP-1 (RNA recognition motif) // 2.9E-11 /// IPR000504 // RNA-binding region RNP-1 (RNA recognition motif) // 8.1E-16
6591	147790_at	0.550852	0.0947075	7.83294	6.96696e-09	3.13849e-07	10.3292	FBgn0034880	CG5372	PS5	PS5	37732	4872 // receptor activity // inferred from sequence or structural similarity /// 50839 // cell adhesion molecule binding // inferred from sequence or structural similarity /// 4872 // receptor activity // inferred from sequence similarity /// 50839 // cell adhesion molecule binding // inferred from sequence similarity	7155 // cell adhesion // inferred from sequence or structural similarity /// 7157 // heterophilic cell adhesion // traceable author statement /// 7160 // cell-matrix adhesion // traceable author statement /// 7155 // cell adhesion // inferred from sequence similarity	8305 // integrin complex // inferred from sequence or structural similarity /// 8305 // integrin complex // non-traceable author statement /// 8305 // integrin complex // inferred from sequence similarity	IPR000413 // Integrins alpha chain // 2.4E-8 /// IPR000413 // Integrins alpha chain // 2.7E-7 /// IPR000413 // Integrins alpha chain // 2.7E-6
7562	148761_at	0.415167	0.798119	7.83443	6.939e-09	3.13849e-07	10.3331	FBgn0036439	CG13474	CG13474	CG13474	39600	4001 // adenosine kinase activity // inferred from electronic annotation	6166 // purine ribonucleoside salvage // inferred from electronic annotation	---	---
1068	142267_at	0.462987	-0.193029	7.8171	7.27089e-09	3.26184e-07	10.2869	FBgn0052635	CG32635	CG32635	CG32635	32303	4872 // receptor activity // inferred from electronic annotation /// 17026 // procollagen C-endopeptidase activity // inferred from sequence or structural similarity /// 5515 // protein binding // inferred from physical interaction /// 17026 // procollagen C-endopeptidase activity // inferred from sequence similarity	6508 // proteolysis // inferred from electronic annotation /// 6732 // coenzyme metabolism // inferred from electronic annotation /// 6810 // transport // inferred from electronic annotation /// 51189 // prosthetic group metabolism // inferred from electronic annotation	---	IPR000859 // CUB // 1.2E-32 /// IPR000859 // CUB // 5.8E-10
3392	144591_at	0.507404	0.0135033	7.81038	7.40375e-09	3.26184e-07	10.269	FBgn0043796	CG12219	CG12219	CG12219	31572	3676 // nucleic acid binding // inferred from electronic annotation /// 8270 // zinc ion binding // inferred from electronic annotation /// 46872 // metal ion binding // inferred from electronic annotation	---	5634 // nucleus // inferred from electronic annotation	IPR007087 // Zn-finger, C2H2 type // 1.9E-4 /// IPR007087 // Zn-finger, C2H2 type // 4.3E-5
8864	150063_at	0.622414	0.406108	7.81449	7.32215e-09	3.26184e-07	10.28	---	---	---	---	---	---	---	---	---
10011	151210_at	0.849231	5.24295	7.8118	7.37557e-09	3.26184e-07	10.2728	FBgn0040735	CG16836	CG16836	CG16836	50208	---	---	---	---
12105	153304_at	0.627878	1.05951	7.81239	7.36376e-09	3.26184e-07	10.2744	FBgn0026263	CG7574	bip1	bip1	38891	5515 // protein binding // non-traceable author statement	---	5634 // nucleus // non-traceable author statement	---
10864	152063_at	0.770547	4.51227	7.80719	7.46777e-09	3.27973e-07	10.2605	FBgn0033820	CG4716	CG4716	CG4716	36471	4486 // methylenetetrahydrofolate dehydrogenase activity // non-traceable author statement	---	---	---
11376	152575_at	0.544222	1.32243	7.80553	7.50133e-09	3.28418e-07	10.256	FBgn0029810	CG12239	CG12239	CG12239	31509	---	---	---	---
8767	149966_at	0.566831	0.11639	7.7972	7.67171e-09	3.33791e-07	10.2338	FBgn0038351	CG5302	CG5302	CG5302	41898	4252 // serine-type endopeptidase activity // non-traceable author statement /// 4263 // chymotrypsin activity // inferred from electronic annotation /// 4295 // trypsin activity // inferred from electronic annotation /// 16491 // oxidoreductase activity // inferred from electronic annotation	6508 // proteolysis // inferred from electronic annotation /// 8152 // metabolism // inferred from electronic annotation	---	IPR001254 // Peptidase S1, chymotrypsin // 4.2E-39 /// IPR001254 // Peptidase S1, chymotrypsin // 3.9E-16
591	141790_at	0.754799	3.59747	7.76053	8.47036e-09	3.62135e-07	10.1358	FBgn0011661	CG10701	Moe	Moesin	31816	3779 // actin binding // non-traceable author statement /// 5200 // structural constituent of cytoskeleton // inferred from electronic annotation /// 5515 // protein binding // inferred from physical interaction /// 8092 // cytoskeletal protein binding // inferred from sequence or structural similarity /// 3779 // actin binding // inferred from electronic annotation /// 5198 // structural molecul…	2009 // morphogenesis of an epithelium // traceable author statement /// 7010 // cytoskeleton organization and biogenesis // traceable author statement /// 7315 // pole plasm assembly // traceable author statement /// 7318 // pole plasm protein localization // traceable author statement /// 8104 // protein localization // traceable author statement /// 9952 // anterior/posterior pattern formation…	5737 // cytoplasm // non-traceable author statement /// 5856 // cytoskeleton // inferred from electronic annotation /// 5886 // plasma membrane // inferred from direct assay /// 5886 // plasma membrane // non-traceable author statement /// 5912 // adherens junction // non-traceable author statement /// 35003 // subapical complex // traceable author statement /// 45169 // fusome // inferred from d…	IPR000299 // Band 4.1 // 1.7E-125 /// IPR000798 // Ezrin/radixin/moesin ERM // 1.0E-126 /// IPR000798 // Ezrin/radixin/moesin ERM // 1.0E-126 /// IPR000299 // Band 4.1 // 6.8E-28 /// IPR000299 // Band 4.1 // 1.5E-89 /// IPR000798 // Ezrin/radixin/moesin ERM // 1.0E-126 /// IPR000299 // Band 4.1 // 6.8E-28 /// IPR000299 // Band 4.1 // 1.5E-89 /// IPR000798 // Ezrin/radixin/moesin ERM // 1.0E-126 /…
5282	146481_at	0.454839	1.24552	7.75775	8.53434e-09	3.62135e-07	10.1284	FBgn0032762	CG10685	CG10685	CG10685	35196	3676 // nucleic acid binding // inferred from electronic annotation /// 3677 // DNA binding // inferred from electronic annotation /// 3899 // DNA-directed RNA polymerase activity // inferred from sequence or structural similarity /// 46983 // protein dimerization activity // inferred from electronic annotation /// 3899 // DNA-directed RNA polymerase activity // inferred from sequence similarity	6360 // transcription from RNA polymerase I promoter // inferred from sequence or structural similarity /// 6366 // transcription from RNA polymerase II promoter // inferred from electronic annotation /// 9299 // mRNA transcription // inferred from electronic annotation /// 6360 // transcription from RNA polymerase I promoter // inferred from sequence similarity	5736 // DNA-directed RNA polymerase I complex // Unknown /// 5736 // DNA-directed RNA polymerase I complex // inferred from curator	IPR008193 // DNA-directed RNA polymerase, 13 to 16 kDa subunit // 1.1E-16
8467	149666_at	0.502159	0.861849	7.75682	8.55578e-09	3.62135e-07	10.1259	FBgn0040257	CG4739	Ugt86Dc	Ugt86Dc	53508	3851 // 2-hydroxyacylsphingosine 1-beta-galactosyltransferase activity // inferred from sequence or structural similarity /// 15020 // glucuronosyltransferase activity // inferred from sequence or structural similarity /// 3851 // 2-hydroxyacylsphingosine 1-beta-galactosyltransferase activity // inferred from sequence similarity /// 15020 // glucuronosyltransferase activity // inferred from seque…	5976 // polysaccharide metabolism // inferred from electronic annotation /// 6952 // defense response // inferred from electronic annotation /// 8202 // steroid metabolism // inferred from electronic annotation /// 9636 // response to toxin // inferred from electronic annotation	---	IPR002213 // UDP-glucoronosyl/UDP-glucosyl transferase // 9.1E-77
9231	150430_at	0.513113	-0.0292882	7.75763	8.537e-09	3.62135e-07	10.1281	FBgn0039060	CG13836	CG13836	CG13836	42741	---	---	---	---
6370	147569_at	0.448067	2.06807	7.75001	8.71485e-09	3.67756e-07	10.1077	FBgn0068819 /// FBgn0075698	CG30152	DmirCG10404 /// DpseGA15681	CG10404 /// GA15681	---	---	---	---	IPR002744 // Protein of unknown function DUF59 // 4.1E-10
7585	148784_at	0.472927	0.155804	7.74387	8.86069e-09	3.72787e-07	10.0912	FBgn0036470	CG13463	CG13463	CG13463	39637	---	---	---	---
5726	146925_at	0.572874	0.414073	7.73628	9.04453e-09	3.79383e-07	10.0709	FBgn0033491	CG18011	CG18011	CG18011	36068	3676 // nucleic acid binding // inferred from electronic annotation /// 5506 // iron ion binding // inferred from electronic annotation /// 8270 // zinc ion binding // inferred from electronic annotation /// 5515 // protein binding // inferred from physical interaction /// 46872 // metal ion binding // inferred from electronic annotation	6118 // electron transport // inferred from electronic annotation	5634 // nucleus // inferred from electronic annotation	IPR007087 // Zn-finger, C2H2 type // 3.7E-5 /// IPR007087 // Zn-finger, C2H2 type // 1.3E-5
5289	146488_at	0.537741	0.208067	7.73292	9.12714e-09	3.81386e-07	10.0619	FBgn0032772	CG17350	CG17350	CG17350	35210	---	---	---	---
12366	153565_at	0.614799	2.99987	7.73213	9.14673e-09	3.81386e-07	10.0598	FBgn0002121	CG2671	l(2)gl	lethal (2) giant larvae	33156	5200 // structural constituent of cytoskeleton // inferred from electronic annotation /// 5515 // protein binding // inferred from sequence or structural similarity /// 17022 // myosin binding // inferred from genetic interaction /// 45159 // myosin II binding // inferred from genetic interaction /// 45159 // myosin II binding // traceable author statement /// 5515 // protein binding // inferred …	74 // regulation of progression through cell cycle // non-traceable author statement /// 1738 // morphogenesis of a polarized epithelium // traceable author statement /// 2009 // morphogenesis of an epithelium // traceable author statement /// 6886 // intracellular protein transport // inferred from electronic annotation /// 7179 // transforming growth factor beta receptor signaling pathway // in…	5578 // extracellular matrix (sensu Metazoa) // inferred from direct assay /// 5614 // interstitial matrix // non-traceable author statement /// 5737 // cytoplasm // inferred from direct assay /// 5737 // cytoplasm // non-traceable author statement /// 5829 // cytosol // traceable author statement /// 5856 // cytoskeleton // non-traceable author statement /// 5886 // plasma membrane // inferred f…	---
9380	150579_at	0.930746	2.25107	7.72095	9.42756e-09	3.88471e-07	10.0299	FBgn0039316	CG11893	CG11893	CG11893	43056	5515 // protein binding // inferred from physical interaction /// 16301 // kinase activity // inferred from electronic annotation /// 16740 // transferase activity // inferred from electronic annotation	---	---	IPR004119 // Protein of unknown function DUF227 // 1.8E-76
10368	151567_at	0.618749	2.91602	7.72167	9.40933e-09	3.88471e-07	10.0318	FBgn0039844	CG1607	CG1607	CG1607	43707	5279 // amino acid-polyamine transporter activity // inferred from electronic annotation /// 15171 // amino acid transporter activity // inferred from sequence or structural similarity /// 15171 // amino acid transporter activity // inferred from sequence similarity	6520 // amino acid metabolism // inferred from electronic annotation /// 6865 // amino acid transport // inferred from electronic annotation	16020 // membrane // inferred from electronic annotation	IPR004841 // Amino acid permease-associated region // 2.0E-6 /// IPR004841 // Amino acid permease-associated region // 5.9E-12
12871	154070_at	0.470786	0.160504	7.7075	9.77755e-09	4.01711e-07	9.99379	FBgn0004462	CG7001	Pk17E	Protein kinase-like 17E	45970	4674 // protein serine/threonine kinase activity // inferred from sequence or structural similarity /// 4674 // protein serine/threonine kinase activity // non-traceable author statement /// 4702 // receptor signaling protein serine/threonine kinase activity // inferred from electronic annotation /// 5524 // ATP binding // inferred from electronic annotation /// 166 // nucleotide binding // infer…	165 // MAPKKK cascade // inferred from electronic annotation /// 6468 // protein amino acid phosphorylation // inferred from sequence or structural similarity /// 6468 // protein amino acid phosphorylation // non-traceable author statement /// 7049 // cell cycle // inferred from electronic annotation /// 6468 // protein amino acid phosphorylation // inferred from electronic annotation /// 6468 //…	---	IPR000719 // Protein kinase // 9.1E-63
5032	146231_at	0.476122	0.677547	7.69564	1.00968e-08	4.10548e-07	9.96199	FBgn0032346 /// FBgn0068175	CG6249	Csl4 /// DyakCsl4	Csl4 /// Csl4	34548	175 // 3'-5'-exoribonuclease activity // inferred from sequence or structural similarity /// 3676 // nucleic acid binding // inferred from electronic annotation /// 3729 // mRNA binding // inferred from electronic annotation /// 5515 // protein binding // inferred from physical interaction /// 175 // 3'-5'-exoribonuclease activity // inferred from sequence similarity	6397 // mRNA processing // inferred from sequence or structural similarity /// 16072 // rRNA metabolism // inferred from electronic annotation /// 6397 // mRNA processing // inferred from sequence similarity	176 // nuclear exosome (RNase complex) // inferred from physical interaction /// 176 // nuclear exosome (RNase complex) // inferred from sequence or structural similarity /// 177 // cytoplasmic exosome (RNase complex) // inferred from sequence or structural similarity /// 5700 // polytene chromosome // non-traceable author statement /// 5634 // nucleus // inferred from electronic annotation /// 1…	---
4793	145992_at	0.415203	-0.19838	7.6872	1.03306e-08	4.183e-07	9.93934	FBgn0031959	CG7104	Spz3	Spz3	34077	5515 // protein binding // inferred from physical interaction	---	---	---
12119	153318_at	0.892661	3.23001	7.68174	1.04845e-08	4.23307e-07	9.92471	FBgn0027348	CG4501	bgm	bubblegum	44117	4467 // long-chain-fatty-acid-CoA ligase activity // inferred from sequence or structural similarity /// 3824 // catalytic activity // inferred from electronic annotation /// 4467 // long-chain-fatty-acid-CoA ligase activity // inferred from sequence similarity	6631 // fatty acid metabolism // inferred from electronic annotation /// 8152 // metabolism // inferred from electronic annotation	---	IPR000873 // AMP-dependent synthetase and ligase // 1.5E-79
1305	142504_s_at	0.510883	-0.195519	7.67974	1.05417e-08	4.24392e-07	9.91932	FBgn0001087 /// FBgn0014575 /// FBgn0082798	CG10986	g /// Danag /// Dpaig	garnet /// garnet /// g	44819	5488 // binding // inferred from electronic annotation	6726 // eye pigment biosynthesis // inferred from direct assay /// 6726 // eye pigment biosynthesis // inferred from expression pattern /// 6726 // eye pigment biosynthesis // inferred from mutant phenotype /// 6727 // ommochrome biosynthesis // inferred from mutant phenotype /// 6895 // Golgi to endosome transport // non-traceable author statement /// 7040 // lysosome organization and biogenesis…	5783 // endoplasmic reticulum // inferred from direct assay /// 5795 // Golgi stack // inferred from direct assay /// 5798 // Golgi-associated vesicle // non-traceable author statement /// 30123 // AP-3 adaptor complex // non-traceable author statement /// 30131 // clathrin adaptor complex // inferred from sequence or structural similarity /// 5795 // Golgi stack // inferred from electronic annot…	IPR002553 // Adaptin, N-terminal // 1.0E-126
11667	152866_at	0.999331	3.85691	7.66245	1.1048e-08	4.43502e-07	9.87289	FBgn0031689	CG10833	Cyp28d1	Cyp28d1	33749	4497 // monooxygenase activity // inferred from electronic annotation /// 16491 // oxidoreductase activity // inferred from electronic annotation /// 5515 // protein binding // inferred from physical interaction /// 5506 // iron ion binding // inferred from electronic annotation /// 20037 // heme binding // inferred from electronic annotation /// 46872 // metal ion binding // inferred from electr…	6118 // electron transport // inferred from electronic annotation /// 8202 // steroid metabolism // inferred from electronic annotation	5792 // microsome // non-traceable author statement /// 16020 // membrane // non-traceable author statement /// 5783 // endoplasmic reticulum // inferred from electronic annotation /// 5792 // microsome // inferred from electronic annotation /// 16020 // membrane // inferred from electronic annotation	IPR001128 // Cytochrome P450 // 4.4E-74
13854	155053_at	0.547737	4.23998	7.65285	1.13397e-08	4.48847e-07	9.8471	FBgn0034051	CG8295	Mlf	Myelodysplasia/myeloid leukemia factor	36750	---	---	5737 // cytoplasm // inferred from direct assay /// 5737 // cytoplasm // non-traceable author statement	---
13608	154807_at	0.606567	4.21791	7.64003	1.17415e-08	4.63376e-07	9.81264	FBgn0022959	CG5654	yps	ypsilon schachtel	39377	3676 // nucleic acid binding // inferred from sequence or structural similarity /// 3677 // DNA binding // inferred from electronic annotation /// 3729 // mRNA binding // traceable author statement /// 30528 // transcription regulator activity // inferred from electronic annotation /// 5515 // protein binding // inferred from physical interaction /// 3676 // nucleic acid binding // inferred from …	6357 // regulation of transcription from RNA polymerase II promoter // inferred from electronic annotation /// 9993 // oogenesis (sensu Insecta) // non-traceable author statement /// 6355 // regulation of transcription, DNA-dependent // inferred from electronic annotation	5634 // nucleus // inferred from sequence or structural similarity /// 5634 // nucleus // inferred from sequence similarity	IPR002059 // Cold-shock DNA-binding domain // 4.7E-38
13560	154759_at	0.413425	0.648536	7.63551	1.18866e-08	4.67783e-07	9.80049	FBgn0030851	CG8326	CG8326	CG8326	32738	---	---	---	---
12432	153631_at	0.538184	0.0830451	7.61946	1.24167e-08	4.76839e-07	9.75731	FBgn0030834	CG8675	CG8675	CG8675	32716	---	---	---	---
13190	154389_at	0.450968	1.88201	7.6204	1.2385e-08	4.76839e-07	9.75984	FBgn0031233	CG11490	CG11490	CG11490	33184	5096 // GTPase activator activity // inferred from sequence or structural similarity /// 5509 // calcium ion binding // inferred from electronic annotation /// 5515 // protein binding // inferred from physical interaction /// 5096 // GTPase activator activity // inferred from sequence similarity	6886 // intracellular protein transport // inferred from electronic annotation	---	IPR000195 // RabGAP/TBC domain // 7.5E-6
3502	144701_at	0.702518	3.35101	7.61434	1.25909e-08	4.78527e-07	9.74352	FBgn0030041	CG12116	CG12116	CG12116	31782	4757 // sepiapterin reductase activity // inferred from sequence or structural similarity /// 5515 // protein binding // inferred from physical interaction /// 16491 // oxidoreductase activity // inferred from electronic annotation /// 4757 // sepiapterin reductase activity // inferred from sequence similarity	8152 // metabolism // inferred from electronic annotation	---	---
6857	148056_at	0.838698	0.71141	7.61397	1.26036e-08	4.78527e-07	9.74252	FBgn0035358	CG14949	CG14949	CG14949	38328	---	---	---	---
11359	152558_at	0.680645	1.46262	7.59957	1.31071e-08	4.90991e-07	9.70376	FBgn0034997	CG3376	CG3376	CG3376	37884	4767 // sphingomyelin phosphodiesterase activity // inferred from sequence or structural similarity /// 16787 // hydrolase activity // inferred from electronic annotation /// 4767 // sphingomyelin phosphodiesterase activity // inferred from electronic annotation /// 4767 // sphingomyelin phosphodiesterase activity // inferred from sequence similarity	6685 // sphingomyelin catabolism // inferred from electronic annotation	---	IPR004843 // Metallo-phosphoesterase // 4.7E-19
10485	151684_i_at	0.696946	2.28834	7.56513	1.43963e-08	5.33577e-07	9.61091	FBgn0052813	CG32813	CG32813	CG32813	31089	---	---	---	---
13074	154273_at	0.507109	2.08677	7.54294	1.52943e-08	5.62398e-07	9.55102	FBgn0004362	CG17950	HmgD	High mobility group protein D	37481	3680 // AT DNA binding // inferred from direct assay /// 8301 // DNA bending activity // inferred from direct assay /// 8301 // DNA bending activity // non-traceable author statement /// 5515 // protein binding // inferred from physical interaction /// 3677 // DNA binding // inferred from electronic annotation	6325 // establishment and/or maintenance of chromatin architecture // inferred from direct assay /// 6355 // regulation of transcription, DNA-dependent // inferred from electronic annotation	790 // nuclear chromatin // inferred from direct assay /// 5634 // nucleus // inferred from electronic annotation /// 5694 // chromosome // inferred from electronic annotation	IPR000910 // HMG1/2 (high mobility group) box // 1.2E-28
12645	153844_at	0.608171	0.378646	7.53141	1.5783e-08	5.77338e-07	9.51989	FBgn0021995	CG2173	Rs1	Rs1	44087	3676 // nucleic acid binding // inferred from electronic annotation /// 3724 // RNA helicase activity // inferred from sequence or structural similarity /// 4004 // ATP-dependent RNA helicase activity // inferred from sequence or structural similarity /// 5524 // ATP binding // inferred from electronic annotation /// 166 // nucleotide binding // inferred from electronic annotation /// 4386 // hel…	6139 // nucleobase, nucleoside, nucleotide and nucleic acid metabolism // inferred from electronic annotation /// 7046 // ribosome biogenesis // non-traceable author statement	---	IPR001650 // Helicase, C-terminal // 1.3E-33 /// IPR001410 // DEAD/DEAH box helicase // 7.9E-83
7496	148695_at	0.785495	1.89169	7.53026	1.5833e-08	5.77658e-07	9.51676	FBgn0036342	CG11279	CG11279	CG11279	39486	---	---	---	---
11030	152229_at	0.866643	1.71407	7.52025	1.62715e-08	5.89055e-07	9.48973	FBgn0038952	CG7069	CG7069	CG7069	42621	4743 // pyruvate kinase activity // inferred from sequence or structural similarity /// 19200 // carbohydrate kinase activity // inferred from electronic annotation /// 287 // magnesium ion binding // inferred from electronic annotation /// 4743 // pyruvate kinase activity // inferred from electronic annotation /// 16301 // kinase activity // inferred from electronic annotation /// 16740 // trans…	6096 // glycolysis // inferred from electronic annotation	---	IPR001697 // Pyruvate kinase // 2.8E-6 /// IPR001697 // Pyruvate kinase // 1.0E-126
10246	151445_at	0.896478	3.91259	7.51533	1.64918e-08	5.94278e-07	9.47642	FBgn0040985	CG6115	CG6115	CG6115	50459	---	---	---	IPR008011 // Complex 1 LYR protein // 6.7E-21
10558	151757_s_at	0.616744	0.493699	7.51513	1.65007e-08	5.94278e-07	9.47589	FBgn0026370	CG8174	SRPK	SRPK	36706	4672 // protein kinase activity // inferred from sequence or structural similarity /// 4672 // protein kinase activity // non-traceable author statement /// 4672 // protein kinase activity // traceable author statement /// 4674 // protein serine/threonine kinase activity // inferred from sequence or structural similarity /// 4702 // receptor signaling protein serine/threonine kinase activity // i…	398 // nuclear mRNA splicing, via spliceosome // inferred from electronic annotation /// 6468 // protein amino acid phosphorylation // traceable author statement /// 6468 // protein amino acid phosphorylation // inferred from electronic annotation	---	IPR000719 // Protein kinase // 3.7E-24 /// IPR000719 // Protein kinase // 9.4E-23 /// IPR000719 // Protein kinase // 3.7E-24 /// IPR000719 // Protein kinase // 9.4E-23
12632	153831_at	0.553509	1.55711	7.5029	1.70614e-08	6.11331e-07	9.44281	FBgn0031904	CG5149	CG5149	CG5149	34013	5515 // protein binding // inferred from physical interaction	---	---	---
7852	149051_at	0.664369	-0.184066	7.49431	1.74668e-08	6.2426e-07	9.41957	FBgn0036874	CG9472	CG9472	CG9472	40116	5262 // calcium channel activity // inferred from sequence or structural similarity /// 5509 // calcium ion binding // inferred from electronic annotation /// 5262 // calcium channel activity // inferred from sequence similarity	6816 // calcium ion transport // inferred from sequence or structural similarity /// 6816 // calcium ion transport // inferred from sequence similarity	16020 // membrane // inferred from electronic annotation	IPR005821 // Ion transport protein // 4.2E-15
4291	145490_at	0.60932	0.0620621	7.49141	1.76056e-08	6.26026e-07	9.41174	FBgn0031196	CG17599	CG17599	CG17599	33142	---	---	---	---
12587	153786_at	0.520397	4.02288	7.48319	1.8006e-08	6.37029e-07	9.38948	FBgn0036433	CG9628	CG9628	CG9628	39593	5515 // protein binding // inferred from physical interaction	---	---	---
1919	143118_at	0.543276	1.79837	7.47418	1.84553e-08	6.44197e-07	9.36509	FBgn0000414	CG9695	Dab	Disabled	39866	3824 // catalytic activity // inferred from electronic annotation /// 4197 // cysteine-type endopeptidase activity // inferred from electronic annotation /// 5102 // receptor binding // inferred from electronic annotation /// 5515 // protein binding // inferred from physical interaction /// 17124 // SH3 domain binding // inferred from physical interaction /// 42169 // SH2 domain binding // inferr…	6508 // proteolysis // inferred from electronic annotation /// 7398 // ectoderm development // inferred from electronic annotation /// 7399 // nervous system development // non-traceable author statement /// 42051 // eye photoreceptor development (sensu Endopterygota) // inferred from mutant phenotype /// 45500 // sevenless signaling pathway // inferred from genetic interaction /// 45500 // seven…	5737 // cytoplasm // inferred from direct assay /// 5737 // cytoplasm // non-traceable author statement	IPR006020 // Phosphotyrosine interaction domain // 1.1E-40
4314	145513_at	0.536558	0.256098	7.4736	1.84845e-08	6.44197e-07	9.36353	FBgn0051975	CG31975	CG31975	CG31975	319052	---	---	---	IPR004119 // Protein of unknown function DUF227 // 5.4E-17 /// IPR004119 // Protein of unknown function DUF227 // 1.0E-14
5767	146966_at	0.460173	0.503603	7.47465	1.84317e-08	6.44197e-07	9.36635	FBgn0033554	CG12938	CG12938	CG12938	36141	---	---	---	---
10805	152004_at	0.354968	0.865367	7.4746	1.84343e-08	6.44197e-07	9.36622	FBgn0000320	CG9554	eya	eyes absent	---	5515 // protein binding // inferred from physical interaction /// 4722 // protein serine/threonine phosphatase activity // inferred from direct assay /// 4725 // protein tyrosine phosphatase activity // inferred from direct assay /// 19204 // nucleotide phosphatase activity // inferred from direct assay /// 42577 // lipid phosphatase activity // inferred from direct assay /// 287 // magnesium ion…	1744 // optic placode formation (sensu Endopterygota) // inferred from mutant phenotype /// 1746 // Bolwig's organ morphogenesis // inferred from mutant phenotype /// 7283 // spermatogenesis // inferred from mutant phenotype /// 7455 // eye-antennal disc morphogenesis // inferred from mutant phenotype /// 8584 // male gonad development // inferred from mutant phenotype /// 9996 // negative regula…	5634 // nucleus // inferred from direct assay /// 5634 // nucleus // inferred from electronic annotation	IPR005834 // Haloacid dehalogenase-like hydrolase // 5.9E-9 /// IPR005834 // Haloacid dehalogenase-like hydrolase // 5.9E-9
3449	144648_at	0.566456	3.40747	7.46787	1.87769e-08	6.49543e-07	9.34799	FBgn0029948	CG15033	CheA7a	CheA7a	31672	---	---	---	---
8759	149958_at	0.512395	-0.352437	7.45913	1.92315e-08	6.61998e-07	9.32432	FBgn0038339	CG6118	CG6118	CG6118	41884	5515 // protein binding // inferred from electronic annotation /// 30528 // transcription regulator activity // inferred from electronic annotation	6139 // nucleobase, nucleoside, nucleotide and nucleic acid metabolism // inferred from electronic annotation /// 6333 // chromatin assembly or disassembly // inferred from electronic annotation /// 6357 // regulation of transcription from RNA polymerase II promoter // inferred from electronic annotation /// 6366 // transcription from RNA polymerase II promoter // inferred from electronic annotat…	---	IPR000210 // BTB/POZ domain // 6.4E-23 /// IPR000210 // BTB/POZ domain // 6.4E-23
6323	147522_at	0.465092	-0.149211	7.45264	1.95761e-08	6.67952e-07	9.30674	FBgn0034476	CG8595	Toll-7	Toll-7	37272	4888 // transmembrane receptor activity // inferred from sequence or structural similarity /// 4888 // transmembrane receptor activity // non-traceable author statement /// 4888 // transmembrane receptor activity // inferred from electronic annotation /// 4888 // transmembrane receptor activity // inferred from sequence similarity	6952 // defense response // non-traceable author statement /// 7155 // cell adhesion // inferred from electronic annotation /// 7165 // signal transduction // inferred from sequence or structural similarity /// 19221 // cytokine and chemokine mediated signaling pathway // inferred from electronic annotation /// 42116 // macrophage activation // inferred from electronic annotation /// 42742 // def…	5886 // plasma membrane // non-traceable author statement /// 16021 // integral to membrane // inferred from sequence or structural similarity /// 16020 // membrane // inferred from electronic annotation /// 16021 // integral to membrane // inferred from sequence similarity	IPR001611 // Leucine-rich repeat // 0.024 /// IPR001611 // Leucine-rich repeat // 0.07 /// IPR001611 // Leucine-rich repeat // 0.92 /// IPR001611 // Leucine-rich repeat // 0.032 /// IPR001611 // Leucine-rich repeat // 2.8E-4 /// IPR001611 // Leucine-rich repeat // 4.2E-4 /// IPR001611 // Leucine-rich repeat // 0.13 /// IPR001611 // Leucine-rich repeat // 0.066 /// IPR001611 // Leucine-rich repeat…
287	141486_at	0.542141	4.02282	7.42919	2.08751e-08	7.06426e-07	9.24315	FBgn0004179	CG6395	Csp	Cysteine string protein	40459	5506 // iron ion binding // inferred from electronic annotation /// 42623 // ATPase activity, coupled // inferred from electronic annotation /// 51082 // unfolded protein binding // inferred from electronic annotation /// 31072 // heat shock protein binding // inferred from electronic annotation	6118 // electron transport // inferred from electronic annotation /// 6457 // protein folding // inferred from electronic annotation /// 6457 // protein folding // non-traceable author statement /// 6886 // intracellular protein transport // inferred from electronic annotation /// 6887 // exocytosis // inferred from mutant phenotype /// 6950 // response to stress // inferred from electronic annot…	5886 // plasma membrane // inferred from sequence or structural similarity /// 8021 // synaptic vesicle // traceable author statement /// 16020 // membrane // inferred from electronic annotation /// 5886 // plasma membrane // inferred from sequence similarity	IPR001623 // Heat shock protein DnaJ, N-terminal // 2.4E-36 /// IPR001623 // Heat shock protein DnaJ, N-terminal // 9.6E-36
10381	151580_at	0.609083	0.887127	7.42246	2.12639e-08	7.17848e-07	9.22489	---	---	---	---	---	8601 // protein phosphatase type 2A regulator activity // inferred from sequence or structural similarity /// 8601 // protein phosphatase type 2A regulator activity // non-traceable author statement /// 8601 // protein phosphatase type 2A regulator activity // inferred from electronic annotation	6470 // protein amino acid dephosphorylation // inferred from sequence or structural similarity /// 6916 // anti-apoptosis // non-traceable author statement /// 7242 // intracellular signaling cascade // inferred from electronic annotation /// 7165 // signal transduction // inferred from electronic annotation	159 // protein phosphatase type 2A complex // inferred from sequence or structural similarity /// 159 // protein phosphatase type 2A complex // inferred from electronic annotation	---
4738	145937_at	0.406295	0.488629	7.41382	2.17738e-08	7.28044e-07	9.20144	FBgn0031880	CG13776	CG13776	CG13776	33984	31072 // heat shock protein binding // inferred from electronic annotation /// 51082 // unfolded protein binding // inferred from electronic annotation	6457 // protein folding // inferred from electronic annotation /// 6605 // protein targeting // inferred from electronic annotation /// 6810 // transport // inferred from electronic annotation /// 15031 // protein transport // inferred from electronic annotation	16020 // membrane // inferred from electronic annotation /// 16021 // integral to membrane // inferred from electronic annotation	IPR001623 // Heat shock protein DnaJ, N-terminal // 5.8E-13 /// IPR001623 // Heat shock protein DnaJ, N-terminal // 5.8E-13
3228	144427_at	0.421875	0.147723	7.37955	2.3922e-08	7.86732e-07	9.10831	FBgn0029647	CG17959	CG17959	CG17959	31288	---	---	---	---
2555	143754_at	0.502937	0.132218	7.37454	2.42535e-08	7.95765e-07	9.09469	FBgn0014179	CG12245	gcm	glial cells missing	34277	3677 // DNA binding // inferred from direct assay /// 3677 // DNA binding // non-traceable author statement /// 3700 // transcription factor activity // traceable author statement /// 3677 // DNA binding // inferred from electronic annotation	6355 // regulation of transcription, DNA-dependent // inferred from electronic annotation /// 6952 // defense response // non-traceable author statement /// 7398 // ectoderm development // inferred from electronic annotation /// 7403 // glial cell fate determination // inferred from mutant phenotype /// 7516 // hemocyte development (sensu Arthropoda) // non-traceable author statement /// 7516 // …	5634 // nucleus // inferred from direct assay /// 5634 // nucleus // inferred from electronic annotation	IPR003902 // Transcriptional regulator, GCM-like // 1.9E-80
268	141467_at	0.4345	2.05658	7.35662	2.54778e-08	8.24399e-07	9.04596	FBgn0003175	CG4444	px	plexus	37573	---	8586 // wing vein morphogenesis // traceable author statement	5654 // nucleoplasm // non-traceable author statement	---
8991	150190_at	0.629748	-0.0277297	7.35766	2.54051e-08	8.24399e-07	9.04878	FBgn0051212	CG31212	CG31212	CG31212	42314	3676 // nucleic acid binding // inferred from electronic annotation /// 3677 // DNA binding // inferred from electronic annotation /// 3678 // DNA helicase activity // inferred from electronic annotation /// 4386 // helicase activity // inferred from sequence or structural similarity /// 5524 // ATP binding // inferred from electronic annotation /// 4386 // helicase activity // inferred from elec…	6357 // regulation of transcription from RNA polymerase II promoter // inferred from electronic annotation	---	IPR000330 // SNF2 related domain // 4.8E-103 /// IPR001650 // Helicase, C-terminal // 1.1E-24
12825	154024_at	0.758626	3.8093	7.35923	2.52958e-08	8.24399e-07	9.05305	FBgn0015268	CG5330	Nap1	Nucleosome assembly protein 1	37798	42393 // histone binding // inferred from direct assay /// 42393 // histone binding // traceable author statement /// 5515 // protein binding // inferred from physical interaction	6334 // nucleosome assembly // inferred from direct assay /// 6334 // nucleosome assembly // inferred from sequence or structural similarity /// 6334 // nucleosome assembly // non-traceable author statement /// 6355 // regulation of transcription, DNA-dependent // inferred from direct assay /// 6461 // protein complex assembly // inferred from electronic annotation /// 6334 // nucleosome assembly…	5634 // nucleus // inferred from direct assay /// 5737 // cytoplasm // inferred from direct assay /// 16590 // ACF complex // inferred from direct assay /// 5634 // nucleus // inferred from electronic annotation	IPR002164 // Nucleosome assembly protein (NAP) // 1.0E-126
13047	154246_at	0.555465	2.37228	7.3566	2.54793e-08	8.24399e-07	9.0459	FBgn0030891	CG7098	dik	diskette	32787	4402 // histone acetyltransferase activity // inferred from sequence or structural similarity /// 5515 // protein binding // inferred from physical interaction /// 4402 // histone acetyltransferase activity // inferred from sequence similarity	---	123 // histone acetyltransferase complex // inferred from sequence or structural similarity /// 5671 // Ada2/Gcn5/Ada3 transcription activator complex // non-traceable author statement /// 5700 // polytene chromosome // inferred from direct assay /// 123 // histone acetyltransferase complex // inferred from sequence similarity	---
9318	150517_at	0.661607	0.424814	7.35388	2.56703e-08	8.28664e-07	9.03851	FBgn0039214	CG5794	CG5794	CG5794	42935	4197 // cysteine-type endopeptidase activity // inferred from electronic annotation /// 4221 // ubiquitin thiolesterase activity // inferred from electronic annotation /// 8233 // peptidase activity // inferred from electronic annotation /// 8234 // cysteine-type peptidase activity // inferred from electronic annotation	6508 // proteolysis // inferred from electronic annotation /// 6511 // ubiquitin-dependent protein catabolism // inferred from electronic annotation /// 19538 // protein metabolism // inferred from electronic annotation	---	IPR001394 // Peptidase C19, ubiquitin carboxyl-terminal hydrolase family 2 // 4.1E-93 /// IPR001394 // Peptidase C19, ubiquitin carboxyl-terminal hydrolase family 2 // 4.1E-93
12063	153262_at	0.531145	1.64014	7.34309	2.64436e-08	8.47769e-07	9.00913	FBgn0036998	CG5969	CG5969	CG5969	40269	5515 // protein binding // inferred from physical interaction	---	---	---
44	141243_at	0.504554	0.456599	7.33762	2.68449e-08	8.54614e-07	8.99422	FBgn0052075	CG32075	CG32075	CG32075	326192	---	---	---	IPR007174 // Las1-like // 1.3E-24
6896	148095_at	0.568443	3.51322	7.33145	2.73042e-08	8.65458e-07	8.97743	FBgn0035423	CG17737	CG17737	CG17737	38398	3743 // translation initiation factor activity // inferred from electronic annotation /// 5515 // protein binding // inferred from physical interaction	6412 // protein biosynthesis // non-traceable author statement /// 6413 // translational initiation // inferred from electronic annotation /// 6412 // protein biosynthesis // inferred from electronic annotation /// 6417 // regulation of protein biosynthesis // inferred from electronic annotation /// 6445 // regulation of translation // inferred from electronic annotation	---	IPR001950 // Translation initiation factor SUI1 // 2.2E-42
13049	154248_at	0.516425	1.71218	7.32342	2.79144e-08	8.80813e-07	8.95556	FBgn0036402	CG6650	CG6650	CG6650	39555	8443 // phosphofructokinase activity // inferred from electronic annotation /// 16773 // phosphotransferase activity, alcohol group as acceptor // inferred from electronic annotation	6096 // glycolysis // inferred from electronic annotation /// 5975 // carbohydrate metabolism // inferred from electronic annotation /// 6006 // glucose metabolism // inferred from electronic annotation	---	IPR007666 // ADP-specific Phosphofructokinase/Glucokinase conserved region // 1.0E-126
3781	144980_at	0.457849	0.128984	7.32018	2.81644e-08	8.86264e-07	8.94674	FBgn0030443	CG12715	CG12715	CG12715	32252	---	---	---	IPR008166 // Protein of unknown function DUF23 // 1.5E-76
13593	154792_at	0.50847	2.65417	7.31301	2.87267e-08	8.9835e-07	8.92717	FBgn0013726	CG8705	pnut	peanut	35801	3779 // actin binding // inferred from direct assay /// 3924 // GTPase activity // inferred from electronic annotation /// 5200 // structural constituent of cytoskeleton // inferred from electronic annotation /// 5525 // GTP binding // inferred from electronic annotation /// 8017 // microtubule binding // inferred from direct assay /// 16787 // hydrolase activity // inferred from electronic annot…	910 // cytokinesis // inferred from mutant phenotype /// 910 // cytokinesis // inferred from sequence or structural similarity /// 910 // cytokinesis // non-traceable author statement /// 910 // cytokinesis // traceable author statement /// 915 // cytokinesis, contractile ring formation // non-traceable author statement /// 6903 // vesicle targeting // traceable author statement /// 6904 // vesic…	5940 // septin ring // inferred from sequence or structural similarity /// 16324 // apical plasma membrane // non-traceable author statement /// 45171 // intercellular bridge // non-traceable author statement /// 45172 // ring canal (sensu Insecta) // non-traceable author statement /// 5940 // septin ring // inferred from sequence similarity	IPR000038 // Cell division/GTP binding protein // 1.0E-126
10424	151623_at	0.575229	1.83312	7.31061	2.8917e-08	8.99375e-07	8.92064	FBgn0033987	CG12424	CG12424	CG12424	36673	---	---	---	IPR001660 // Sterile alpha motif SAM // 1.8E-15 /// IPR001660 // Sterile alpha motif SAM // 4.0E-19
2226	143425_at	0.494178	0.45708	7.30862	2.90761e-08	9.00482e-07	8.91521	FBgn0004102	CG12154	oc	ocelliless	31802	3700 // transcription factor activity // inferred from sequence or structural similarity /// 4197 // cysteine-type endopeptidase activity // inferred from electronic annotation /// 3677 // DNA binding // inferred from electronic annotation /// 3700 // transcription factor activity // inferred from electronic annotation /// 43565 // sequence-specific DNA binding // inferred from electronic annotat…	1700 // embryonic development (sensu Insecta) // inferred from mutant phenotype /// 6355 // regulation of transcription, DNA-dependent // inferred from sequence or structural similarity /// 6508 // proteolysis // inferred from electronic annotation /// 7355 // anterior region determination // traceable author statement /// 7389 // pattern specification // non-traceable author statement /// 7398 /…	5634 // nucleus // inferred from sequence or structural similarity /// 5634 // nucleus // non-traceable author statement /// 5634 // nucleus // inferred from electronic annotation /// 5634 // nucleus // inferred from sequence similarity	IPR001356 // Homeobox // 1.7E-28 /// IPR001356 // Homeobox // 1.7E-28
8488	149687_at	0.66492	3.06375	7.30623	2.92675e-08	9.03168e-07	8.90871	FBgn0037899	CG6764	CG6764	CG6764	41372	3676 // nucleic acid binding // inferred from electronic annotation /// 3735 // structural constituent of ribosome // inferred from sequence or structural similarity /// 5515 // protein binding // inferred from physical interaction /// 3735 // structural constituent of ribosome // inferred from electronic annotation /// 3735 // structural constituent of ribosome // inferred from sequence similari…	6412 // protein biosynthesis // inferred from sequence or structural similarity /// 42254 // ribosome biogenesis and assembly // inferred from sequence or structural similarity /// 6412 // protein biosynthesis // inferred from electronic annotation /// 7046 // ribosome biogenesis // inferred from electronic annotation /// 6412 // protein biosynthesis // inferred from sequence similarity /// 42254…	5842 // cytosolic large ribosomal subunit (sensu Eukaryota) // inferred from sequence or structural similarity /// 5622 // intracellular // inferred from electronic annotation /// 5634 // nucleus // inferred from electronic annotation /// 5840 // ribosome // inferred from electronic annotation /// 5842 // cytosolic large ribosomal subunit (sensu Eukaryota) // inferred from sequence similarity	IPR000988 // Ribosomal protein L24E // 3.6E-33
11885	153084_at	0.529218	2.48973	7.28271	3.12282e-08	9.57346e-07	8.84454	FBgn0013467	CG18285	igl	igloo	36681	5516 // calmodulin binding // inferred from direct assay	---	---	IPR000048 // IQ calmodulin-binding region // 4.2E-6 /// IPR000048 // IQ calmodulin-binding region // 8.4E-6 /// IPR000048 // IQ calmodulin-binding region // 4.2E-6 /// IPR000048 // IQ calmodulin-binding region // 8.4E-6
4789	145988_at	0.912698	2.96337	7.27482	3.19152e-08	9.74144e-07	8.823	FBgn0040099	CG7106	lectin-28C	lectin-28C	53542	5534 // galactose binding // inferred from sequence or structural similarity /// 5515 // protein binding // inferred from physical interaction /// 1584 // rhodopsin-like receptor activity // inferred from electronic annotation /// 4871 // signal transducer activity // inferred from electronic annotation /// 4872 // receptor activity // inferred from electronic annotation /// 4930 // G-protein cou…	7283 // spermatogenesis // inferred from electronic annotation /// 8594 // photoreceptor cell morphogenesis (sensu Endopterygota) // inferred from mutant phenotype /// 42052 // rhabdomere development // inferred from mutant phenotype /// 7165 // signal transduction // inferred from electronic annotation /// 7186 // G-protein coupled receptor protein signaling pathway // inferred from electronic a…	16027 // inaD signaling complex // inferred from physical interaction /// 5767 // secondary lysosome // inferred from direct assay /// 5771 // multivesicular body // inferred from direct assay /// 5791 // rough endoplasmic reticulum // inferred from direct assay /// 16023 // cytoplasmic membrane-bound vesicle // inferred from direct assay /// 16028 // rhabdomere // inferred from direct assay /// …	IPR001304 // C-type lectin // 4.8E-14 /// IPR001304 // C-type lectin // 4.8E-14
11493	152692_at	0.760842	3.81582	7.2737	3.20143e-08	9.75044e-07	8.81993	FBgn0027621	CG3400	Pfrx	6-phosphofructo-2-kinase	32938	3873 // 6-phosphofructo-2-kinase activity // inferred from sequence or structural similarity /// 3873 // 6-phosphofructo-2-kinase activity // non-traceable author statement /// 4331 // fructose-2,6-bisphosphate 2-phosphatase activity // inferred from sequence or structural similarity /// 4331 // fructose-2,6-bisphosphate 2-phosphatase activity // non-traceable author statement /// 5524 // ATP bin…	6000 // fructose metabolism // inferred from sequence or structural similarity /// 6003 // fructose 2,6-bisphosphate metabolism // inferred from electronic annotation /// 6096 // glycolysis // inferred from electronic annotation /// 8152 // metabolism // inferred from electronic annotation /// 6000 // fructose metabolism // inferred from sequence similarity	---	IPR003094 // Fructose-2,6-bisphosphatase // 5.8E-114 /// IPR001345 // Phosphoglycerate/bisphosphoglycerate mutase // 2.9E-89 /// IPR003094 // Fructose-2,6-bisphosphatase // 5.8E-114 /// IPR001345 // Phosphoglycerate/bisphosphoglycerate mutase // 2.9E-89
12205	153404_at	0.422602	1.09745	7.27142	3.22163e-08	9.79068e-07	8.81371	FBgn0004864	CG1594	hop	hopscotch	32080	4713 // protein-tyrosine kinase activity // non-traceable author statement /// 4715 // non-membrane spanning protein tyrosine kinase activity // non-traceable author statement /// 4718 // Janus kinase activity // inferred from sequence or structural similarity /// 4718 // Janus kinase activity // non-traceable author statement /// 4718 // Janus kinase activity // traceable author statement /// 55…	910 // cytokinesis // traceable author statement /// 6468 // protein amino acid phosphorylation // non-traceable author statement /// 6508 // proteolysis // inferred from electronic annotation /// 6952 // defense response // non-traceable author statement /// 6955 // immune response // traceable author statement /// 6959 // humoral immune response // traceable author statement /// 6968 // cellula…	5737 // cytoplasm // non-traceable author statement /// 5737 // cytoplasm // traceable author statement /// 5856 // cytoskeleton // inferred from electronic annotation	IPR000719 // Protein kinase // 5.7E-6 /// IPR000719 // Protein kinase // 5.0E-62
21	141220_at	0.476755	1.49499	7.2688	3.24492e-08	9.84011e-07	8.80658	FBgn0039831	CG12054	CG12054	CG12054	43694	3676 // nucleic acid binding // inferred from electronic annotation /// 8270 // zinc ion binding // inferred from electronic annotation /// 5515 // protein binding // inferred from physical interaction /// 46872 // metal ion binding // inferred from electronic annotation	---	5634 // nucleus // inferred from electronic annotation	---
11675	152874_at	0.749744	3.50422	7.26318	3.29571e-08	9.91535e-07	8.79121	FBgn0050015	CG30015	CG30015	CG30015	36147	---	---	---	---
11981	153180_at	0.588068	1.95913	7.26349	3.29283e-08	9.91535e-07	8.79207	FBgn0036534	CG6169	CG6169	CG6169	39722	---	---	---	IPR007722 // Dcp2, box A // 1.6E-24 /// IPR000086 // NUDIX hydrolase // 1.2E-14 /// IPR007722 // Dcp2, box A // 5.0E-38 /// IPR000086 // NUDIX hydrolase // 2.0E-7 /// IPR007722 // Dcp2, box A // 5.0E-38 /// IPR000086 // NUDIX hydrolase // 1.2E-14
9191	150390_at	0.368727	1.22202	7.24902	3.42704e-08	1.02592e-06	8.75254	FBgn0039002	CG17625	CG17625	CG17625	42678	---	---	---	IPR001660 // Sterile alpha motif SAM // 1.2E-9
611	141810_at	0.98616	6.37616	7.22499	3.66224e-08	1.08245e-06	8.68685	FBgn0010352	CG11661	Nc73EF	Neural conserved at 73EF	39899	4591 // oxoglutarate dehydrogenase (succinyl-transferring) activity // inferred from sequence or structural similarity /// 4591 // oxoglutarate dehydrogenase (succinyl-transferring) activity // inferred from electronic annotation /// 16624 // oxidoreductase activity, acting on the aldehyde or oxo group of donors, disulfide as acceptor // inferred from electronic annotation /// 30976 // thiamin py…	6099 // tricarboxylic acid cycle // inferred from sequence or structural similarity /// 6096 // glycolysis // inferred from electronic annotation /// 8152 // metabolism // inferred from electronic annotation /// 6099 // tricarboxylic acid cycle // inferred from sequence similarity	9353 // oxoglutarate dehydrogenase complex (sensu Eukaryota) // inferred from sequence or structural similarity /// 9353 // oxoglutarate dehydrogenase complex (sensu Eukaryota) // inferred from sequence similarity	IPR005475 // Transketolase, central region // 7.4E-67 /// IPR001017 // Dehydrogenase, E1 component // 3.3E-112 /// IPR001017 // Dehydrogenase, E1 component // 1.9E-96 /// IPR005475 // Transketolase, central region // 7.4E-67 /// IPR005475 // Transketolase, central region // 7.4E-67 /// IPR001017 // Dehydrogenase, E1 component // 3.3E-112
6879	148078_at	0.472291	-0.0505509	7.20406	3.88051e-08	1.13736e-06	8.62955	---	---	---	---	---	---	---	---	---
13822	155021_at	0.776867	2.55762	7.19804	3.94562e-08	1.15163e-06	8.61309	FBgn0038932 /// FBgn0053334	CG5740	CG5740 /// CG33334	CG5740 /// CG33334	2768675 /// 42600	5200 // structural constituent of cytoskeleton // inferred from electronic annotation	7010 // cytoskeleton organization and biogenesis // inferred from electronic annotation	---	---
11822	153021_at	0.603078	0.473302	7.19143	4.0185e-08	1.16561e-06	8.59497	FBgn0037727	CG8358	CG8358	CG8358	41172	4245 // neprilysin activity // inferred from sequence or structural similarity /// 8270 // zinc ion binding // inferred from electronic annotation /// 4245 // neprilysin activity // inferred from electronic annotation /// 8233 // peptidase activity // inferred from electronic annotation /// 8237 // metallopeptidase activity // inferred from electronic annotation /// 16787 // hydrolase activity //…	6508 // proteolysis // inferred from electronic annotation /// 7165 // signal transduction // inferred from electronic annotation	16020 // membrane // inferred from electronic annotation	IPR008753 // Peptidase M13 // 2.8E-8 /// IPR000718 // Peptidase M13, neprilysin // 3.9E-36
13727	154926_at	0.455611	0.426598	7.19161	4.01649e-08	1.16561e-06	8.59547	FBgn0002891	CG1925	mus205	mutagen-sensitive 205	47186	166 // nucleotide binding // inferred from electronic annotation /// 3676 // nucleic acid binding // inferred from electronic annotation /// 3677 // DNA binding // inferred from electronic annotation /// 3894 // zeta DNA polymerase activity // inferred from sequence or structural similarity /// 3894 // zeta DNA polymerase activity // non-traceable author statement /// 8408 // 3'-5' exonuclease ac…	6260 // DNA replication // non-traceable author statement /// 19985 // bypass DNA synthesis // non-traceable author statement /// 6260 // DNA replication // inferred from electronic annotation	16035 // zeta DNA polymerase complex // inferred from sequence or structural similarity /// 16035 // zeta DNA polymerase complex // non-traceable author statement /// 16035 // zeta DNA polymerase complex // inferred from sequence similarity	IPR006134 // DNA polymerase B domain // 1.0E-126
1172	142371_at	0.806	1.59098	7.18657	4.0729e-08	1.17652e-06	8.58167	FBgn0016684	CG10207	NaPi-T	Na<up>+</up>-dependent inorganic phosphate cotransporter	36651	5316 // high affinity inorganic phosphate:sodium symporter activity // inferred from sequence or structural similarity /// 5316 // high affinity inorganic phosphate:sodium symporter activity // non-traceable author statement /// 15114 // phosphate transporter activity // inferred from electronic annotation /// 5515 // protein binding // inferred from physical interaction /// 5215 // transporter a…	6796 // phosphate metabolism // inferred from electronic annotation /// 6812 // cation transport // inferred from electronic annotation /// 6817 // phosphate transport // inferred from electronic annotation /// 6858 // extracellular transport // inferred from electronic annotation /// 6810 // transport // inferred from electronic annotation /// 6814 // sodium ion transport // inferred from electr…	16021 // integral to membrane // inferred from electronic annotation /// 16020 // membrane // inferred from electronic annotation	---
12858	154057_at	0.441414	1.33008	7.17389	4.21838e-08	1.21252e-06	8.54693	FBgn0021761	CG4579	Nup154	Nup154	34527	5215 // transporter activity // inferred from electronic annotation /// 5487 // nucleocytoplasmic transporter activity // inferred from electronic annotation /// 17056 // structural constituent of nuclear pore // inferred from electronic annotation /// 15288 // porin activity // inferred from electronic annotation	6605 // protein targeting // inferred from electronic annotation /// 6886 // intracellular protein transport // inferred from electronic annotation /// 6913 // nucleocytoplasmic transport // inferred from electronic annotation /// 7010 // cytoskeleton organization and biogenesis // inferred from electronic annotation	5634 // nucleus // inferred from direct assay /// 5643 // nuclear pore // inferred from sequence or structural similarity /// 5643 // nuclear pore // non-traceable author statement /// 5643 // nuclear pore // inferred from electronic annotation /// 16021 // integral to membrane // inferred from electronic annotation /// 19867 // outer membrane // inferred from electronic annotation /// 5643 // nu…	IPR004870 // Non-repetitive/WGA-negative nucleoporin // 1.0E-126 /// IPR004870 // Non-repetitive/WGA-negative nucleoporin // 1.0E-126
11903	153102_at	0.417466	2.00699	7.16906	4.27527e-08	1.22305e-06	8.53368	FBgn0051224	CG31224	CG31224	CG31224	42237	3676 // nucleic acid binding // inferred from sequence or structural similarity /// 8270 // zinc ion binding // inferred from electronic annotation /// 30528 // transcription regulator activity // inferred from electronic annotation /// 3676 // nucleic acid binding // inferred from electronic annotation /// 3676 // nucleic acid binding // inferred from sequence similarity	6357 // regulation of transcription from RNA polymerase II promoter // inferred from electronic annotation /// 8283 // cell proliferation // inferred from electronic annotation	5634 // nucleus // inferred from sequence or structural similarity /// 5634 // nucleus // inferred from electronic annotation /// 5634 // nucleus // inferred from sequence similarity	IPR007087 // Zn-finger, C2H2 type // 6.0E-5 /// IPR007087 // Zn-finger, C2H2 type // 3.8E-6 /// IPR007087 // Zn-finger, C2H2 type // 4.7E-5 /// IPR007087 // Zn-finger, C2H2 type // 5.1E-5
10349	151548_at	0.597211	1.18963	7.16278	4.35027e-08	1.23642e-06	8.51647	FBgn0034886	CG5411	Pde8	Phosphodiesterase 8	37741	4115 // 3',5'-cyclic-AMP phosphodiesterase activity // inferred from direct assay /// 4115 // 3',5'-cyclic-AMP phosphodiesterase activity // inferred from sequence or structural similarity /// 4871 // signal transducer activity // inferred from electronic annotation /// 156 // two-component response regulator activity // inferred from electronic annotation /// 3824 // catalytic activity // inferr…	7165 // signal transduction // inferred from electronic annotation /// 7498 // mesoderm development // inferred from expression pattern /// 9187 // cyclic nucleotide metabolism // inferred from electronic annotation /// 160 // two-component signal transduction system (phosphorelay) // inferred from electronic annotation /// 6355 // regulation of transcription, DNA-dependent // inferred from elect…	---	IPR000014 // PAS domain // 6.6E-5 /// IPR002073 // 35-cyclic nucleotide phosphodiesterase // 9.0E-70 /// IPR000014 // PAS domain // 6.6E-5 /// IPR002073 // 35-cyclic nucleotide phosphodiesterase // 9.0E-70 /// IPR000014 // PAS domain // 6.6E-5 /// IPR002073 // 35-cyclic nucleotide phosphodiesterase // 9.0E-70 /// IPR002073 // 35-cyclic nucleotide phosphodiesterase // 9.0E-70
7821	149020_at	0.606651	0.718962	7.16018	4.38167e-08	1.24266e-06	8.50935	FBgn0036827	CG6843	CG6843	CG6843	40062	3712 // transcription cofactor activity // inferred from electronic annotation /// 30528 // transcription regulator activity // inferred from electronic annotation	6139 // nucleobase, nucleoside, nucleotide and nucleic acid metabolism // inferred from electronic annotation /// 6357 // regulation of transcription from RNA polymerase II promoter // inferred from electronic annotation /// 6366 // transcription from RNA polymerase II promoter // inferred from electronic annotation	---	---
10376	151575_at	0.598045	1.45123	7.15064	4.4991e-08	1.27338e-06	8.48317	---	---	---	---	---	16564 // transcriptional repressor activity // inferred from genetic interaction /// 5515 // protein binding // inferred from physical interaction /// 3682 // chromatin binding // inferred from sequence or structural similarity /// 4386 // helicase activity // inferred from sequence or structural similarity /// 3677 // DNA binding // inferred from direct assay /// 16887 // ATPase activity // infe…	6333 // chromatin assembly or disassembly // inferred from sequence or structural similarity /// 42766 // nucleosome mobilization // inferred from direct assay /// 6333 // chromatin assembly or disassembly // inferred from electronic annotation /// 6350 // transcription // inferred from electronic annotation /// 6355 // regulation of transcription, DNA-dependent // inferred from electronic annota…	5634 // nucleus // inferred from sequence or structural similarity /// 5700 // polytene chromosome // inferred from direct assay /// 785 // chromatin // inferred from electronic annotation /// 5634 // nucleus // inferred from electronic annotation /// 16581 // NuRD complex // traceable author statement	---
347	141546_at	0.554758	1.1611	7.14733	4.54052e-08	1.27963e-06	8.47411	FBgn0037250	CG1074	CG1074	CG1074	40564	3677 // DNA binding // inferred from electronic annotation /// 8170 // N-methyltransferase activity // inferred from electronic annotation	6306 // DNA methylation // inferred from electronic annotation	---	---
5197	146396_at	0.504733	0.0411317	7.14394	4.58344e-08	1.27963e-06	8.4648	FBgn0045485	CG31748	Gr36c	Gustatory receptor 36c	117486	8527 // taste receptor activity // non-traceable author statement	50909 // sensory perception of taste // non-traceable author statement	16021 // integral to membrane // non-traceable author statement	---
13835	155034_at	0.39636	0.700395	7.12601	4.81711e-08	1.33674e-06	8.41559	FBgn0011836	CG6711	Taf2	TBP-associated factor 2	39164	3677 // DNA binding // inferred from electronic annotation /// 8170 // N-methyltransferase activity // inferred from electronic annotation /// 16251 // general RNA polymerase II transcription factor activity // inferred from sequence or structural similarity /// 4179 // membrane alanyl aminopeptidase activity // inferred from electronic annotation /// 16251 // general RNA polymerase II transcript…	6306 // DNA methylation // inferred from electronic annotation /// 6355 // regulation of transcription, DNA-dependent // non-traceable author statement /// 6357 // regulation of transcription from RNA polymerase II promoter // inferred from electronic annotation /// 6367 // transcription initiation from RNA polymerase II promoter // inferred from sequence or structural similarity /// 6350 // tran…	5634 // nucleus // non-traceable author statement /// 5669 // transcription factor TFIID complex // inferred from sequence or structural similarity /// 5634 // nucleus // inferred from electronic annotation /// 5669 // transcription factor TFIID complex // inferred from sequence similarity	---
2399	143598_at	0.532823	0.627399	7.1072	5.07523e-08	1.39147e-06	8.36393	FBgn0010338	CG32684	Man-I	Mannosidase I	31957	4571 // mannosyl-oligosaccharide 1,2-alpha-mannosidase activity // inferred from sequence or structural similarity /// 4571 // mannosyl-oligosaccharide 1,2-alpha-mannosidase activity // non-traceable author statement /// 5509 // calcium ion binding // inferred from electronic annotation /// 4571 // mannosyl-oligosaccharide 1,2-alpha-mannosidase activity // inferred from electronic annotation /// …	6487 // protein amino acid N-linked glycosylation // inferred from sequence or structural similarity /// 6487 // protein amino acid N-linked glycosylation // non-traceable author statement /// 5975 // carbohydrate metabolism // inferred from electronic annotation /// 6487 // protein amino acid N-linked glycosylation // inferred from electronic annotation /// 6487 // protein amino acid N-linked gl…	139 // Golgi membrane // non-traceable author statement /// 5794 // Golgi apparatus // inferred from sequence or structural similarity /// 5795 // Golgi stack // inferred from electronic annotation /// 16020 // membrane // inferred from electronic annotation /// 16021 // integral to membrane // inferred from electronic annotation /// 5794 // Golgi apparatus // inferred from sequence similarity	IPR001382 // Glycoside hydrolase, family 47 // 1.0E-126
11471	152670_at	0.460558	0.580333	7.10237	5.14382e-08	1.40752e-06	8.35065	FBgn0037561	CG9630	CG9630	CG9630	40974	3676 // nucleic acid binding // inferred from electronic annotation /// 4004 // ATP-dependent RNA helicase activity // inferred from sequence or structural similarity /// 5524 // ATP binding // inferred from electronic annotation /// 166 // nucleotide binding // inferred from electronic annotation /// 4386 // helicase activity // inferred from electronic annotation /// 8026 // ATP-dependent helic…	6139 // nucleobase, nucleoside, nucleotide and nucleic acid metabolism // inferred from electronic annotation	---	IPR001650 // Helicase, C-terminal // 6.1E-24 /// IPR001410 // DEAD/DEAH box helicase // 4.5E-65
10478	151677_at	0.87823	3.06885	7.10081	5.16615e-08	1.41087e-06	8.34636	FBgn0052479	CG32479	CG32479	CG32479	38103	4197 // cysteine-type endopeptidase activity // inferred from electronic annotation /// 4221 // ubiquitin thiolesterase activity // inferred from electronic annotation /// 4843 // ubiquitin-specific protease activity // inferred from sequence or structural similarity /// 4843 // ubiquitin-specific protease activity // inferred from sequence similarity	6508 // proteolysis // inferred from electronic annotation /// 6511 // ubiquitin-dependent protein catabolism // inferred from electronic annotation /// 16579 // protein deubiquitination // inferred from sequence or structural similarity /// 16579 // protein deubiquitination // inferred from sequence similarity	---	IPR001394 // Peptidase C19, ubiquitin carboxyl-terminal hydrolase family 2 // 2.6E-69
8468	149667_at	0.51537	0.0506942	7.0839	5.41452e-08	1.46443e-06	8.29989	FBgn0040253	CG17200	Ugt86Dg	Ugt86Dg	53504	15020 // glucuronosyltransferase activity // inferred from sequence or structural similarity /// 15020 // glucuronosyltransferase activity // inferred from sequence similarity	5976 // polysaccharide metabolism // inferred from electronic annotation /// 6952 // defense response // inferred from electronic annotation /// 8202 // steroid metabolism // inferred from electronic annotation /// 9636 // response to toxin // inferred from electronic annotation	---	IPR002213 // UDP-glucoronosyl/UDP-glucosyl transferase // 1.9E-79
1542	142741_at	0.487332	-0.0927994	7.08094	5.45929e-08	1.46806e-06	8.29175	FBgn0050101	CG30101	CG30101	CG30101	36950	5515 // protein binding // inferred from physical interaction	---	---	---
12376	153575_at	0.516748	1.5949	7.07821	5.5009e-08	1.47639e-06	8.28423	FBgn0035148	CG3402	CG3402	CG3402	38077	5515 // protein binding // inferred from electronic annotation /// 5515 // protein binding // inferred from physical interaction	---	---	IPR001478 // PDZ/DHR/GLGF domain // 9.9E-15
2779	143978_at	0.655707	1.93545	7.07663	5.52503e-08	1.47721e-06	8.2799	FBgn0023179	CG6438	amon	amontillado	43215	4286 // proprotein convertase 2 activity // inferred from sequence or structural similarity /// 4291 // subtilisin activity // non-traceable author statement /// 8233 // peptidase activity // inferred from direct assay /// 8233 // peptidase activity // inferred from sequence or structural similarity /// 4289 // subtilase activity // inferred from electronic annotation /// 8233 // peptidase activi…	6508 // proteolysis // inferred from direct assay /// 16486 // peptide hormone processing // inferred from sequence or structural similarity /// 35187 // hatching behavior // inferred from mutant phenotype /// 6508 // proteolysis // inferred from electronic annotation /// 7218 // neuropeptide signaling pathway // inferred from electronic annotation /// 16486 // peptide hormone processing // infer…	---	IPR002884 // Peptidase S8B, proprotein convertase, P domain // 8.3E-74 /// IPR000209 // Peptidase S8 and S53, subtilisin, kexin, sedolisin // 3.2E-111
5667	146866_at	0.562872	0.349505	7.0749	5.55169e-08	1.48151e-06	8.27514	FBgn0033379	CG8070	Mys45A	Mystery 45A	35925	---	---	---	IPR007949 // SDA1 // 1.0E-126
177	141376_at	0.397136	0.819773	7.06996	5.62845e-08	1.49629e-06	8.26155	FBgn0040238	CG6264	Best1	Bestrophin 1	53431	5254 // chloride channel activity // non-traceable author statement	6810 // transport // inferred from electronic annotation /// 6811 // ion transport // inferred from electronic annotation	---	IPR000615 // Bestrophin // 1.0E-126
9184	150383_at	0.408685	0.242155	7.06814	5.65707e-08	1.50105e-06	8.25653	FBgn0051156	CG31156	CG31156	CG31156	42669	3676 // nucleic acid binding // inferred from electronic annotation /// 3682 // chromatin binding // inferred from electronic annotation /// 3729 // mRNA binding // inferred from electronic annotation /// 16788 // hydrolase activity, acting on ester bonds // inferred from electronic annotation /// 5515 // protein binding // inferred from physical interaction /// 3723 // RNA binding // inferred fr…	6139 // nucleobase, nucleoside, nucleotide and nucleic acid metabolism // inferred from electronic annotation /// 6333 // chromatin assembly or disassembly // inferred from electronic annotation /// 6366 // transcription from RNA polymerase II promoter // inferred from electronic annotation /// 9299 // mRNA transcription // inferred from electronic annotation	---	IPR003029 // RNA binding S1 // 2.5E-14 /// IPR003029 // RNA binding S1 // 2.5E-14
8447	149646_at	0.390632	0.359206	7.06469	5.71149e-08	1.51263e-06	8.24706	FBgn0037836	---	CG14692	CG14692	41298	---	---	---	IPR003117 // cAMP-dependent protein kinase regulator, type II PKA R subunit // 7.5E-6 /// IPR003117 // cAMP-dependent protein kinase regulator, type II PKA R subunit // 2.7E-7 /// IPR000048 // IQ calmodulin-binding region // 4.6E-5 /// IPR000048 // IQ calmodulin-binding region // 9.9E-7
11998	153197_at	0.563185	1.66132	7.0617	5.75922e-08	1.52239e-06	8.23882	FBgn0000568	CG8127	Eip75B	Ecdysone-induced protein 75B	39999	3677 // DNA binding // inferred from electronic annotation /// 3700 // transcription factor activity // inferred from electronic annotation /// 3704 // specific RNA polymerase II transcription factor activity // inferred from sequence or structural similarity /// 3707 // steroid hormone receptor activity // inferred from electronic annotation /// 4879 // ligand-dependent nuclear receptor activity…	6355 // regulation of transcription, DNA-dependent // non-traceable author statement /// 6357 // regulation of transcription from RNA polymerase II promoter // inferred from electronic annotation /// 7242 // intracellular signaling cascade // inferred from electronic annotation /// 7267 // cell-cell signaling // inferred from electronic annotation /// 7553 // regulation of ecdysteroid metabolism …	5634 // nucleus // inferred from sequence or structural similarity /// 5634 // nucleus // non-traceable author statement /// 5634 // nucleus // inferred from electronic annotation /// 5634 // nucleus // inferred from sequence similarity	IPR000536 // Ligand-binding domain of nuclear hormone receptor // 2.2E-38 /// IPR001628 // Zn-finger, C4-type steroid receptor // 3.6E-31 /// IPR000536 // Ligand-binding domain of nuclear hormone receptor // 2.2E-38 /// IPR001628 // Zn-finger, C4-type steroid receptor // 2.1E-55 /// IPR000536 // Ligand-binding domain of nuclear hormone receptor // 2.2E-38 /// IPR001628 // Zn-finger, C4-type stero…
6113	147312_at	0.435127	0.260769	7.05765	5.8245e-08	1.53675e-06	8.22767	FBgn0053550	---	CG33550	CG33550	3346205	---	---	---	---
12373	153572_at	0.436571	0.398213	7.05511	5.86586e-08	1.54475e-06	8.22067	FBgn0038640	CG7706	CG7706	CG7706	42244	17107 // anion exchanger adaptor activity // inferred from sequence or structural similarity /// 17107 // anion exchanger adaptor activity // inferred from sequence similarity	---	---	IPR000253 // Forkhead-associated (FHA) // 1.2E-12
7688	148887_at	0.454332	0.187382	7.04875	5.97054e-08	1.56937e-06	8.20316	FBgn0036615	CG4933	CG4933	CG4933	39811	8270 // zinc ion binding // inferred from electronic annotation /// 8450 // O-sialoglycoprotein endopeptidase activity // inferred from sequence or structural similarity /// 8450 // O-sialoglycoprotein endopeptidase activity // inferred from electronic annotation /// 8450 // O-sialoglycoprotein endopeptidase activity // inferred from sequence similarity	6508 // proteolysis // inferred from electronic annotation	---	IPR000905 // Peptidase M22, glycoprotease // 2.0E-106
6082	147281_at	0.536976	0.208391	7.04458	6.04014e-08	1.57878e-06	8.19169	FBgn0050095	CG30095	CG30095	CG30095	246453	16491 // oxidoreductase activity // inferred from electronic annotation	8152 // metabolism // inferred from electronic annotation	---	---
7353	148552_at	0.481436	0.288652	7.04102	6.10025e-08	1.58856e-06	8.1819	FBgn0036128	CG11801	CG11801	CG11801	39245	8415 // acyltransferase activity // inferred from electronic annotation /// 16740 // transferase activity // inferred from electronic annotation	6629 // lipid metabolism // inferred from electronic annotation /// 6631 // fatty acid metabolism // inferred from electronic annotation	16021 // integral to membrane // inferred from electronic annotation	IPR002076 // GNS1/SUR4 membrane protein // 3.2E-23
11961	153160_at	0.344484	1.5563	7.04159	6.0907e-08	1.58856e-06	8.18345	FBgn0033741	CG8545	CG8545	CG8545	36365	3676 // nucleic acid binding // inferred from electronic annotation	6364 // rRNA processing // inferred from sequence or structural similarity /// 16072 // rRNA metabolism // inferred from electronic annotation /// 6364 // rRNA processing // inferred from sequence similarity	5730 // nucleolus // inferred from sequence or structural similarity /// 5730 // nucleolus // inferred from sequence similarity	IPR001678 // Bacterial Sun/eukaryotic nucleolar Nop1/Nop2 // 4.8E-126
13323	154522_at	0.48436	0.0290839	7.03954	6.12555e-08	1.59219e-06	8.1778	FBgn0031018	CG12200	CG12200	CG12200	32932	5515 // protein binding // inferred from electronic annotation /// 8270 // zinc ion binding // inferred from electronic annotation	---	---	---
5058	146257_at	0.921314	2.71534	7.03532	6.19795e-08	1.59894e-06	8.16617	FBgn0032382	CG14935	CG14935	CG14935	34598	4556 // alpha-amylase activity // inferred from electronic annotation /// 4558 // alpha-glucosidase activity // inferred from sequence or structural similarity /// 5215 // transporter activity // inferred from electronic annotation /// 4558 // alpha-glucosidase activity // inferred from sequence similarity	5975 // carbohydrate metabolism // inferred from electronic annotation	---	IPR006047 // Alpha amylase, catalytic domain // 3.7E-113 /// IPR006047 // Alpha amylase, catalytic domain // 3.7E-113
5948	147147_at	0.33601	0.242784	7.0347	6.20858e-08	1.59894e-06	8.16448	---	---	---	---	---	---	---	---	---
8403	149602_at	0.418068	-0.168932	7.03581	6.18938e-08	1.59894e-06	8.16754	FBgn0037772	CG12807	CG12807	CG12807	41221	4866 // endopeptidase inhibitor activity // inferred from sequence or structural similarity /// 4867 // serine-type endopeptidase inhibitor activity // inferred from electronic annotation /// 4866 // endopeptidase inhibitor activity // inferred from sequence similarity	---	---	---
11273	152472_at	0.490741	1.25858	7.03566	6.19197e-08	1.59894e-06	8.16713	FBgn0039056	CG6742	cenB1A	centaurin beta 1A	42735	4553 // hydrolase activity, hydrolyzing O-glycosyl compounds // inferred from electronic annotation /// 8060 // ARF GTPase activator activity // inferred from sequence or structural similarity /// 8060 // ARF GTPase activator activity // inferred from sequence similarity	5975 // carbohydrate metabolism // inferred from electronic annotation /// 7010 // cytoskeleton organization and biogenesis // inferred from electronic annotation /// 7155 // cell adhesion // inferred from electronic annotation /// 7186 // G-protein coupled receptor protein signaling pathway // inferred from electronic annotation /// 43087 // regulation of GTPase activity // inferred from electro…	---	IPR001164 // Human Rev interacting-like protein (hRIP) // 1.1E-49 /// IPR002110 // Ankyrin // 8.2E-4 /// IPR002110 // Ankyrin // 0.035 /// IPR002110 // Ankyrin // 2.7 /// IPR001849 // Pleckstrin-like // 1.3E-21 /// IPR001164 // Human Rev interacting-like protein (hRIP) // 1.1E-49 /// IPR002110 // Ankyrin // 8.2E-4 /// IPR002110 // Ankyrin // 0.035 /// IPR002110 // Ankyrin // 2.7 /// IPR001849 // …
12440	153639_at	0.508134	1.64262	7.03111	6.27094e-08	1.61203e-06	8.15459	FBgn0039691	CG1972	CG1972	CG1972	43506	4521 // endoribonuclease activity // inferred from electronic annotation /// 8143 // poly(A) binding // inferred from electronic annotation	6378 // mRNA polyadenylylation // inferred from sequence or structural similarity /// 6379 // mRNA cleavage // inferred from sequence or structural similarity /// 6398 // histone mRNA 3'-end processing // inferred from electronic annotation /// 6378 // mRNA polyadenylylation // inferred from sequence similarity /// 6379 // mRNA cleavage // inferred from sequence similarity	5847 // mRNA cleavage and polyadenylation specificity factor complex // inferred from sequence or structural similarity /// 5847 // mRNA cleavage and polyadenylation specificity factor complex // inferred from sequence similarity	IPR001279 // Beta-lactamase-like // 4.0E-16
11765	152964_at	0.446665	2.04103	7.00774	6.6928e-08	1.71106e-06	8.09016	FBgn0033915	CG8485	CG8485	CG8485	36579	4674 // protein serine/threonine kinase activity // non-traceable author statement /// 5524 // ATP binding // inferred from electronic annotation /// 16909 // SAP kinase activity // inferred from sequence or structural similarity /// 166 // nucleotide binding // inferred from electronic annotation /// 4672 // protein kinase activity // inferred from electronic annotation /// 4674 // protein serin…	6468 // protein amino acid phosphorylation // non-traceable author statement /// 6468 // protein amino acid phosphorylation // inferred from electronic annotation	---	IPR000719 // Protein kinase // 2.4E-88
12066	153265_at	0.428482	0.593608	7.00018	6.83525e-08	1.73565e-06	8.06932	FBgn0034194	CG15611	CG15611	CG15611	36930	5515 // protein binding // inferred from physical interaction	---	---	IPR000219 // DH domain // 3.2E-8 /// IPR000219 // DH domain // 3.2E-8
9821	151020_at	0.534804	0.241136	6.99432	6.94775e-08	1.757e-06	8.05317	---	CG31349	---	---	---	5515 // protein binding // inferred from electronic annotation	7391 // dorsal closure // traceable author statement /// 7163 // establishment and/or maintenance of cell polarity // non-traceable author statement /// 7254 // JNK cascade // non-traceable author statement /// 7391 // dorsal closure // non-traceable author statement /// 46328 // regulation of JNK cascade // non-traceable author statement	5912 // adherens junction // traceable author statement /// 5912 // adherens junction // non-traceable author statement	IPR001478 // PDZ/DHR/GLGF domain // 6.1E-24 /// IPR001478 // PDZ/DHR/GLGF domain // 1.7E-17 /// IPR008144 // Guanylate kinase // 1.0E-13
3140	144339_r_at	0.402658	-0.168866	6.99306	6.9723e-08	1.76004e-06	8.04968	FBgn0029518	CG13376	CG13376	CG13376	3346142	---	---	---	---
9575	150774_at	0.311691	-0.209086	6.98957	7.04044e-08	1.77404e-06	8.04006	FBgn0039584	CG14064	beat-VI	beat-VI	43377	5515 // protein binding // inferred from physical interaction /// 5515 // protein binding // inferred from electronic annotation	7155 // cell adhesion // inferred from electronic annotation /// 7275 // development // inferred from electronic annotation	5576 // extracellular region // non-traceable author statement /// 16021 // integral to membrane // inferred from electronic annotation	IPR007110 // Immunoglobulin-like // 5.8E-6
10086	151285_at	0.450238	0.152846	6.98829	7.06562e-08	1.77719e-06	8.03652	FBgn0040811	CG13479	CG13479	CG13479	50284	---	---	---	---
836	142035_at	0.508943	0.429296	6.98695	7.09208e-08	1.78065e-06	8.03283	---	---	---	---	---	---	---	---	---
5422	146621_at	0.664132	6.30256	6.98354	7.15984e-08	1.79444e-06	8.02342	FBgn0032987	CG12775	RpL21	Ribosomal protein L21	35453	3676 // nucleic acid binding // inferred from electronic annotation /// 3735 // structural constituent of ribosome // inferred from electronic annotation	6412 // protein biosynthesis // inferred from sequence or structural similarity /// 6412 // protein biosynthesis // inferred from electronic annotation /// 6412 // protein biosynthesis // inferred from sequence similarity	5842 // cytosolic large ribosomal subunit (sensu Eukaryota) // inferred from sequence or structural similarity /// 5622 // intracellular // inferred from electronic annotation /// 5840 // ribosome // inferred from electronic annotation /// 5842 // cytosolic large ribosomal subunit (sensu Eukaryota) // inferred from sequence similarity	IPR001147 // Ribosomal protein L21e // 1.3E-62
2957	144156_at	0.79665	3.52792	6.97355	7.36216e-08	1.83857e-06	7.99584	FBgn0026753	CG6213	Vha13	Vacuolar H<up>+</up> ATPase G-subunit	42341	8553 // hydrogen-exporting ATPase activity, phosphorylative mechanism // inferred from sequence or structural similarity /// 8553 // hydrogen-exporting ATPase activity, phosphorylative mechanism // non-traceable author statement /// 5515 // protein binding // inferred from physical interaction /// 15078 // hydrogen ion transporter activity // inferred from electronic annotation /// 16787 // hydro…	1700 // embryonic development (sensu Insecta) // inferred from mutant phenotype /// 15992 // proton transport // inferred from sequence or structural similarity /// 6754 // ATP biosynthesis // inferred from electronic annotation /// 6810 // transport // inferred from electronic annotation /// 6811 // ion transport // inferred from electronic annotation /// 15992 // proton transport // inferred fr…	221 // hydrogen-transporting ATPase V1 domain // inferred from sequence or structural similarity /// 221 // hydrogen-transporting ATPase V1 domain // non-traceable author statement /// 221 // hydrogen-transporting ATPase V1 domain // inferred from sequence similarity	IPR005124 // Vacuolar (H+)-ATPase G subunit // 1.2E-55
10453	151652_at	0.398354	1.88932	6.95283	7.80044e-08	1.92598e-06	7.93863	FBgn0034300	CG5098	CG5098	CG5098	37063	---	---	---	---
37	141236_at	0.434645	0.0602058	6.95018	7.85836e-08	1.9315e-06	7.93131	FBgn0020312	CG4050	CG4050	CG4050	37401	16253 // UDP-N-acetylglucosamine-peptide N-acetylglucosaminyltransferase activity // inferred from sequence or structural similarity /// 5488 // binding // inferred from electronic annotation /// 16253 // UDP-N-acetylglucosamine-peptide N-acetylglucosaminyltransferase activity // inferred from sequence similarity	---	17122 // UDP-N-acetylglucosamine-peptide N-acetylglucosaminyltransferase complex // inferred from sequence or structural similarity /// 17122 // UDP-N-acetylglucosamine-peptide N-acetylglucosaminyltransferase complex // inferred from sequence similarity	IPR001440 // TPR repeat // 4.8E-8 /// IPR001440 // TPR repeat // 0.0016 /// IPR001440 // TPR repeat // 4.2E-6 /// IPR001440 // TPR repeat // 8.0E-11 /// IPR001440 // TPR repeat // 7.5E-6 /// IPR001440 // TPR repeat // 0.14 /// IPR001440 // TPR repeat // 0.0047
12663	153862_at	0.483885	0.669816	6.94551	7.96164e-08	1.95346e-06	7.91839	FBgn0010926	CG5824	l(3)07882	lethal (3) 07882	46201	5515 // protein binding // inferred from physical interaction	---	---	IPR007276 // Nop14-like protein // 1.0E-126
11881	153080_at	0.368005	-0.214379	6.94033	8.07757e-08	1.97226e-06	7.90408	FBgn0033702	CG8854	CG8854	CG8854	36324	---	---	---	---
12109	153308_at	0.760109	3.51152	6.93957	8.09481e-08	1.97232e-06	7.90197	FBgn0000181	CG3644	bic	bicaudal	45827	3700 // transcription factor activity // inferred from sequence or structural similarity /// 16251 // general RNA polymerase II transcription factor activity // inferred from electronic annotation /// 5515 // protein binding // inferred from physical interaction /// 8565 // protein transporter activity // traceable author statement /// 3700 // transcription factor activity // inferred from sequen…	6357 // regulation of transcription from RNA polymerase II promoter // inferred from electronic annotation /// 6367 // transcription initiation from RNA polymerase II promoter // inferred from electronic annotation /// 1700 // embryonic development (sensu Insecta) // inferred from mutant phenotype /// 7318 // pole plasm protein localization // inferred from mutant phenotype /// 15031 // protein t…	5854 // nascent polypeptide-associated complex // non-traceable author statement	IPR002715 // Nascent polypeptide-associated complex NAC // 6.3E-26
3406	144605_at	0.560066	0.548375	6.93255	8.25513e-08	2.00441e-06	7.88257	FBgn0029885	CG3224	CG3224	CG3224	31600	5515 // protein binding // inferred from physical interaction /// 3676 // nucleic acid binding // inferred from electronic annotation /// 8270 // zinc ion binding // inferred from electronic annotation /// 46872 // metal ion binding // inferred from electronic annotation	---	5634 // nucleus // inferred from electronic annotation	---
10554	151753_r_at	0.381314	2.80129	6.93007	8.31251e-08	2.01137e-06	7.87572	FBgn0053123	CG33123	CG33123	CG33123	326262	3729 // mRNA binding // inferred from electronic annotation /// 4601 // peroxidase activity // inferred from electronic annotation /// 4823 // leucine-tRNA ligase activity // inferred from sequence or structural similarity /// 5524 // ATP binding // inferred from electronic annotation /// 4812 // aminoacyl-tRNA ligase activity // inferred from electronic annotation /// 4823 // leucine-tRNA ligase…	6418 // tRNA aminoacylation for protein translation // inferred from electronic annotation /// 6979 // response to oxidative stress // inferred from electronic annotation /// 6412 // protein biosynthesis // inferred from electronic annotation	5737 // cytoplasm // inferred from electronic annotation	---
8218	149417_at	0.628648	2.11617	6.92732	8.37662e-08	2.02339e-06	7.86812	FBgn0037463	CG1984	djl	don juan like	40839	---	---	16007 // mitochondrial derivative // non-traceable author statement /// 19861 // flagellum // non-traceable author statement	---
10739	151938_at	0.46031	1.26218	6.92492	8.43304e-08	2.03002e-06	7.86147	FBgn0036035	CG18178	CG18178	CG18178	39138	5515 // protein binding // inferred from physical interaction /// 166 // nucleotide binding // inferred from electronic annotation	---	---	---
11572	152771_at	0.657452	3.42031	6.91473	8.67671e-08	2.07796e-06	7.83329	FBgn0039266	CG11791	CG11791	CG11791	43000	5515 // protein binding // inferred from physical interaction	---	---	---
603	141802_at	0.483272	1.49393	6.90056	9.02726e-08	2.14723e-06	7.7941	FBgn0022960	CG3572	vimar	visceral mesodermal armadillo-repeats	35609	5085 // guanyl-nucleotide exchange factor activity // inferred from electronic annotation /// 17160 // Ral GTPase binding // inferred from sequence or structural similarity /// 5488 // binding // inferred from electronic annotation /// 31072 // heat shock protein binding // inferred from electronic annotation /// 51082 // unfolded protein binding // inferred from electronic annotation /// 17160 /…	7242 // intracellular signaling cascade // inferred from electronic annotation /// 6457 // protein folding // inferred from electronic annotation /// 6605 // protein targeting // inferred from electronic annotation /// 6810 // transport // inferred from electronic annotation /// 15031 // protein transport // inferred from electronic annotation	16020 // membrane // inferred from electronic annotation /// 16021 // integral to membrane // inferred from electronic annotation	---
13080	154279_at	0.431878	3.72838	6.88678	9.38216e-08	2.22034e-06	7.75595	FBgn0028665	CG2934	VhaAC39	VhaAC39	31342	8553 // hydrogen-exporting ATPase activity, phosphorylative mechanism // inferred from sequence or structural similarity /// 8553 // hydrogen-exporting ATPase activity, phosphorylative mechanism // non-traceable author statement /// 46933 // hydrogen-transporting ATP synthase activity, rotational mechanism // inferred from electronic annotation /// 46961 // hydrogen-transporting ATPase activity, …	15986 // ATP synthesis coupled proton transport // inferred from electronic annotation /// 15992 // proton transport // non-traceable author statement /// 6754 // ATP biosynthesis // inferred from electronic annotation /// 6810 // transport // inferred from electronic annotation /// 6811 // ion transport // inferred from electronic annotation /// 15992 // proton transport // inferred from electro…	220 // hydrogen-transporting ATPase V0 domain // inferred from sequence or structural similarity /// 220 // hydrogen-transporting ATPase V0 domain // non-traceable author statement /// 16469 // proton-transporting two-sector ATPase complex // inferred from electronic annotation /// 220 // hydrogen-transporting ATPase V0 domain // inferred from sequence similarity	IPR002843 // H+-transporting two-sector ATPase, C (AC39) subunit // 1.0E-126
10043	151242_at	0.477658	-0.123462	6.87317	9.74639e-08	2.29106e-06	7.71827	---	---	---	---	---	---	---	---	---
9226	150425_at	0.453451	0.12564	6.8695	9.84732e-08	2.30704e-06	7.70808	FBgn0039053	CG6738	CG6738	CG6738	42732	4046 // aminoacylase activity // non-traceable author statement /// 8237 // metallopeptidase activity // inferred from electronic annotation /// 4046 // aminoacylase activity // inferred from electronic annotation /// 16787 // hydrolase activity // inferred from electronic annotation /// 46983 // protein dimerization activity // inferred from electronic annotation	6508 // proteolysis // inferred from electronic annotation /// 6520 // amino acid metabolism // inferred from electronic annotation	5737 // cytoplasm // inferred from electronic annotation	IPR002933 // Peptidase M20 // 8.4E-92
904	142103_at	0.501629	0.937525	6.86334	1.00184e-07	2.3393e-06	7.69104	---	---	---	---	---	---	---	---	---
6456	147655_at	0.374826	0.476188	6.85774	1.0177e-07	2.36844e-06	7.67549	FBgn0050327	CG30327	CG30327	CG30327	246542	3729 // mRNA binding // inferred from sequence or structural similarity /// 3729 // mRNA binding // inferred from sequence similarity	---	5693 // snRNP U12 // non-traceable author statement /// 30532 // small nuclear ribonucleoprotein complex // inferred from sequence or structural similarity /// 30532 // small nuclear ribonucleoprotein complex // inferred from sequence similarity	IPR000504 // RNA-binding region RNP-1 (RNA recognition motif) // 6.7E-8
13549	154748_at	0.350617	2.17759	6.8536	1.02958e-07	2.38814e-06	7.66402	FBgn0038574	CG7212	cdm	cadmus	42171	5215 // transporter activity // inferred from electronic annotation /// 8565 // protein transporter activity // inferred from electronic annotation /// 5488 // binding // inferred from electronic annotation	59 // protein import into nucleus, docking // inferred from electronic annotation	5634 // nucleus // inferred from electronic annotation /// 5643 // nuclear pore // inferred from electronic annotation /// 5737 // cytoplasm // inferred from electronic annotation	IPR001494 // Importin-beta, N-terminal // 2.4E-19
11315	152514_at	0.405093	1.20893	6.83532	1.08369e-07	2.49301e-06	7.61335	FBgn0038716	CG7342	CG7342	CG7342	42335	8513 // organic cation porter activity // inferred from sequence or structural similarity /// 15144 // carbohydrate transporter activity // inferred from electronic annotation /// 8513 // organic cation porter activity // inferred from sequence similarity	6812 // cation transport // inferred from electronic annotation /// 6858 // extracellular transport // inferred from electronic annotation	16021 // integral to membrane // inferred from electronic annotation	IPR005828 // General substrate transporter // 9.9E-10
9469	150668_i_at	0.493485	-0.437416	6.81421	1.14979e-07	2.61928e-06	7.55477	FBgn0039440	CG5471	CG5471	CG5471	43206	---	---	---	IPR004145 // Protein of unknown function DUF243 // 5.4E-76
6241	147440_at	0.493619	1.19524	6.81251	1.15528e-07	2.62752e-06	7.55006	FBgn0034350 /// FBgn0050120	CG5189	CG5189 /// CG30120	CG5189 /// CG30120	246467 /// 37122	---	---	5794 // Golgi apparatus // non-traceable author statement	IPR004942 // Roadblock/LC7 family // 1.8E-21
12537	153736_at	0.445441	0.370163	6.80018	1.19597e-07	2.69381e-06	7.51582	FBgn0034496	CG9143	CG9143	CG9143	37296	3729 // mRNA binding // inferred from sequence or structural similarity /// 4004 // ATP-dependent RNA helicase activity // inferred from sequence or structural similarity /// 5524 // ATP binding // inferred from electronic annotation /// 3676 // nucleic acid binding // inferred from electronic annotation /// 4386 // helicase activity // inferred from electronic annotation /// 8026 // ATP-dependen…	6139 // nucleobase, nucleoside, nucleotide and nucleic acid metabolism // inferred from electronic annotation	---	IPR001650 // Helicase, C-terminal // 7.2E-31 /// IPR001410 // DEAD/DEAH box helicase // 1.8E-55
8743	149942_at	0.564411	0.983191	6.79608	1.2098e-07	2.71623e-06	7.50444	FBgn0045035	CG6535	tefu	telomere fusion	41839	4672 // protein kinase activity // inferred from sequence or structural similarity /// 4672 // protein kinase activity // non-traceable author statement /// 4702 // receptor signaling protein serine/threonine kinase activity // inferred from electronic annotation /// 3677 // DNA binding // inferred from electronic annotation /// 4674 // protein serine/threonine kinase activity // inferred from el…	75 // cell cycle checkpoint // inferred from sequence or structural similarity /// 6281 // DNA repair // inferred from electronic annotation /// 6348 // chromatin silencing at telomere // inferred from mutant phenotype /// 6445 // regulation of translation // inferred from electronic annotation /// 6468 // protein amino acid phosphorylation // inferred from electronic annotation /// 7001 // chrom…	---	IPR000403 // Phosphatidylinositol 3- and 4-kinase // 8.4E-60 /// IPR003151 // PIK-related kinase, FAT // 2.1E-7 /// IPR003152 // PIK-related kinase, FATC // 4.6E-9
2716	143915_at	0.27588	0.169779	6.77259	1.29228e-07	2.89214e-06	7.4392	FBgn0020269	CG10145	mspo	M-spondin	36632	5198 // structural molecule activity // inferred from electronic annotation	7010 // cytoskeleton organization and biogenesis // inferred from electronic annotation /// 7155 // cell adhesion // inferred from electronic annotation /// 7398 // ectoderm development // inferred from electronic annotation /// 7275 // development // inferred from electronic annotation	5578 // extracellular matrix (sensu Metazoa) // non-traceable author statement	IPR000884 // Thrombospondin, type I // 1.2E-9 /// IPR009465 // Spondin, N-terminal // 1.0E-126
12614	153813_at	0.686026	0.4016	6.77061	1.29951e-07	2.89906e-06	7.43368	FBgn0004463	CG8344	RpIII128	RNA polymerase III 128kD subunit	36289	3676 // nucleic acid binding // inferred from electronic annotation /// 3677 // DNA binding // inferred from electronic annotation /// 3899 // DNA-directed RNA polymerase activity // inferred from sequence or structural similarity /// 3899 // DNA-directed RNA polymerase activity // inferred from electronic annotation /// 8270 // zinc ion binding // inferred from electronic annotation /// 16740 //…	6366 // transcription from RNA polymerase II promoter // inferred from electronic annotation /// 6383 // transcription from RNA polymerase III promoter // inferred from sequence or structural similarity /// 6383 // transcription from RNA polymerase III promoter // non-traceable author statement /// 9299 // mRNA transcription // inferred from electronic annotation /// 6350 // transcription // infe…	5634 // nucleus // non-traceable author statement /// 5666 // DNA-directed RNA polymerase III complex // inferred from sequence or structural similarity /// 5634 // nucleus // inferred from electronic annotation /// 5666 // DNA-directed RNA polymerase III complex // inferred from sequence similarity	IPR007641 // RNA polymerase Rpb2, domain 7 // 8.0E-47 /// IPR007644 // RNA polymerase beta subunit // 7.4E-62 /// IPR007642 // RNA polymerase Rpb2, domain 2 // 1.7E-29 /// IPR007645 // RNA polymerase Rpb2, domain 3 // 9.9E-30 /// IPR007646 // RNA polymerase Rpb2, domain 4 // 2.0E-38 /// IPR007647 // RNA polymerase Rpb2, domain 5 // 2.4E-19 /// IPR007120 // RNA polymerase Rpb2, domain 6 // 1.0E-126
7314	148513_at	0.526638	0.258609	6.76388	1.32432e-07	2.92986e-06	7.41497	FBgn0000451	CG6611	ect	ectodermal	44135	---	---	---	---
7456	148655_at	0.369618	0.450649	6.76466	1.32141e-07	2.92986e-06	7.41715	FBgn0052104	CG32104	CG32104	CG32104	39413	5509 // calcium ion binding // inferred from electronic annotation /// 5524 // ATP binding // inferred from electronic annotation /// 16887 // ATPase activity // inferred from electronic annotation /// 5488 // binding // inferred from electronic annotation	---	---	---
204	141403_at	0.55235	1.62415	6.76215	1.33078e-07	2.93148e-06	7.41016	FBgn0030748 /// FBgn0068013	CG4394	Traf3 /// DyakTraf3	Traf3 /// Traf3	32611	5515 // protein binding // inferred from physical interaction	6952 // defense response // inferred from sequence or structural similarity /// 7165 // signal transduction // inferred from sequence or structural similarity /// 6952 // defense response // inferred from sequence similarity /// 7165 // signal transduction // inferred from sequence similarity	---	IPR002083 // MATH // 3.9E-11 /// IPR002083 // MATH // 3.9E-11 /// IPR002083 // MATH // 3.9E-11
12374	153573_at	0.362363	0.274432	6.75659	1.3517e-07	2.96824e-06	7.39473	FBgn0013799	CG8567	Deaf1	Deformed epidermal autoregulatory factor-1	40164	3677 // DNA binding // inferred from electronic annotation /// 3702 // RNA polymerase II transcription factor activity // inferred from direct assay /// 3702 // RNA polymerase II transcription factor activity // inferred from sequence or structural similarity /// 30528 // transcription regulator activity // inferred from electronic annotation /// 5515 // protein binding // inferred from physical …	74 // regulation of progression through cell cycle // inferred from electronic annotation /// 7049 // cell cycle // inferred from electronic annotation /// 9792 // embryonic development (sensu Metazoa) // inferred from mutant phenotype /// 6350 // transcription // inferred from electronic annotation /// 6355 // regulation of transcription, DNA-dependent // inferred from electronic annotation	5634 // nucleus // inferred from direct assay /// 5700 // polytene chromosome // inferred from direct assay /// 5634 // nucleus // inferred from electronic annotation	IPR000770 // SAND // 3.5E-47 /// IPR002893 // Zn-finger, MYND type // 3.1E-21
583	141782_at	0.566213	1.33664	6.74524	1.39556e-07	3.05974e-06	7.36315	FBgn0028633	CG2615	ik2	ik2	35329	4672 // protein kinase activity // non-traceable author statement /// 4674 // protein serine/threonine kinase activity // inferred from sequence or structural similarity /// 5351 // sugar porter activity // inferred from electronic annotation /// 5524 // ATP binding // inferred from electronic annotation /// 8384 // IkappaB kinase activity // non-traceable author statement /// 8965 // phosphoenol…	6468 // protein amino acid phosphorylation // non-traceable author statement /// 6952 // defense response // non-traceable author statement /// 7165 // signal transduction // non-traceable author statement /// 9401 // phosphoenolpyruvate-dependent sugar phosphotransferase system // inferred from electronic annotation /// 19221 // cytokine and chemokine mediated signaling pathway // inferred from …	8385 // IkappaB kinase complex // non-traceable author statement /// 5737 // cytoplasm // inferred from electronic annotation	IPR000626 // Ubiquitin // 3.3E-4 /// IPR000719 // Protein kinase // 2.6E-47
7279	148478_at	0.596989	0.439416	6.74464	1.39791e-07	3.06011e-06	7.36148	FBgn0036019	CG14176	Or67b	Odorant receptor 67b	39120	4984 // olfactory receptor activity // inferred from sequence or structural similarity /// 5549 // odorant binding // inferred from electronic annotation /// 4984 // olfactory receptor activity // inferred from electronic annotation /// 4984 // olfactory receptor activity // inferred from sequence similarity	7608 // sensory perception of smell // inferred from sequence or structural similarity /// 7608 // sensory perception of smell // inferred from electronic annotation /// 7608 // sensory perception of smell // inferred from sequence similarity	16021 // integral to membrane // inferred from sequence or structural similarity /// 16020 // membrane // inferred from electronic annotation /// 16021 // integral to membrane // inferred from sequence similarity	IPR004117 // Olfactory receptor, Drosophila // 5.7E-15 /// IPR004117 // Olfactory receptor, Drosophila // 5.7E-15
246	141445_at	0.874508	2.29969	6.73377	1.44131e-07	3.1453e-06	7.33123	FBgn0024753	CG32593	Flo-2	flotillin 2	32425	5102 // receptor binding // inferred from electronic annotation /// 5198 // structural molecule activity // inferred from expression pattern /// 5515 // protein binding // inferred from electronic annotation	7155 // cell adhesion // non-traceable author statement /// 7398 // ectoderm development // inferred from electronic annotation /// 7399 // nervous system development // inferred from electronic annotation /// 7155 // cell adhesion // inferred from electronic annotation	16021 // integral to membrane // inferred from electronic annotation /// 16600 // flotillin complex // non-traceable author statement /// 16020 // membrane // inferred from electronic annotation /// 16600 // flotillin complex // inferred from electronic annotation	IPR001107 // Band 7 protein // 2.5E-33 /// IPR004851 // Flotillin // 1.7E-113 /// IPR001107 // Band 7 protein // 9.0E-36 /// IPR004851 // Flotillin // 1.7E-113 /// IPR001107 // Band 7 protein // 3.6E-23 /// IPR004851 // Flotillin // 1.7E-113 /// IPR001107 // Band 7 protein // 3.0E-8 /// IPR004851 // Flotillin // 1.7E-113
3834	145033_at	0.429716	0.235709	6.73089	1.45305e-07	3.16105e-06	7.32321	FBgn0053174	CG33174	CG33174	CG33174	32343	3824 // catalytic activity // inferred from electronic annotation /// 4806 // triacylglycerol lipase activity // inferred from electronic annotation	6629 // lipid metabolism // inferred from electronic annotation	---	IPR002921 // Lipase, class 3 // 8.8E-14
6097	147296_at	0.489385	2.01656	6.72476	1.47829e-07	3.20106e-06	7.30618	FBgn0034104	CG15705	CG15705	CG15705	36815	5515 // protein binding // inferred from physical interaction	---	---	---
13552	154751_at	0.498794	2.47877	6.72386	1.48205e-07	3.20424e-06	7.30367	FBgn0002524	CG4162	lace	lace	34910	4758 // serine C-palmitoyltransferase activity // inferred from sequence or structural similarity /// 4758 // serine C-palmitoyltransferase activity // non-traceable author statement /// 8483 // transaminase activity // inferred from electronic annotation /// 5515 // protein binding // inferred from physical interaction /// 16740 // transferase activity // inferred from electronic annotation /// …	6629 // lipid metabolism // inferred from electronic annotation /// 9058 // biosynthesis // inferred from electronic annotation	---	IPR004839 // Aminotransferase, class I and II // 6.9E-29
1297	142496_at	0.384986	-0.0680018	6.72229	1.48862e-07	3.20856e-06	7.29929	---	---	---	---	---	---	---	---	---
317	141516_at	0.515114	1.00932	6.71819	1.50589e-07	3.23433e-06	7.28788	FBgn0038478	CG5148	CG5148	CG5148	42065	---	---	---	---
5882	147081_at	0.3242	0.441814	6.70588	1.55899e-07	3.31434e-06	7.2536	FBgn0033718	CG13162	CG13162	CG13162	36341	---	---	---	---
10498	151697_at	0.489625	1.76602	6.70529	1.56157e-07	3.31479e-06	7.25197	FBgn0040080	CG5692	raps	rapsynoid	53569	5085 // guanyl-nucleotide exchange factor activity // inferred from electronic annotation /// 5096 // GTPase activator activity // inferred from electronic annotation /// 5488 // binding // inferred from electronic annotation /// 5515 // protein binding // inferred from physical interaction	132 // establishment of mitotic spindle orientation // inferred from mutant phenotype /// 6605 // protein targeting // inferred from electronic annotation /// 7186 // G-protein coupled receptor protein signaling pathway // inferred from electronic annotation /// 7400 // neuroblast fate determination // traceable author statement /// 8105 // asymmetric protein localization // traceable author stat…	5938 // cell cortex // traceable author statement /// 45177 // apical part of cell // non-traceable author statement /// 45179 // apical cortex // traceable author statement	IPR003109 // GoLoco // 4.8E-12 /// IPR003109 // GoLoco // 4.3E-11 /// IPR003109 // GoLoco // 7.2E-13 /// IPR001440 // TPR repeat // 2.8E-4 /// IPR001440 // TPR repeat // 1.3E-5 /// IPR001440 // TPR repeat // 0.033 /// IPR001440 // TPR repeat // 1.1E-6 /// IPR001440 // TPR repeat // 6.8E-4 /// IPR001440 // TPR repeat // 3.4E-5 /// IPR001440 // TPR repeat // 0.029
5305	146504_at	0.427848	0.409442	6.69509	1.6071e-07	3.396e-06	7.22354	FBgn0032808	CG13079	CG13079	CG13079	35250	4866 // endopeptidase inhibitor activity // inferred from sequence or structural similarity /// 4866 // endopeptidase inhibitor activity // inferred from sequence similarity	---	---	IPR001599 // Alpha-2-macroglobulin // 1.5E-8 /// IPR001599 // Alpha-2-macroglobulin // 9.7E-17 /// IPR001599 // Alpha-2-macroglobulin // 4.4E-7
247	141446_at	0.455529	1.73461	6.68133	1.67062e-07	3.46776e-06	7.18521	FBgn0039427	CG5447	CG5447	CG5447	43192	5515 // protein binding // inferred from physical interaction	---	---	---
517	141716_at	0.407797	3.03009	6.68275	1.66395e-07	3.46776e-06	7.18916	FBgn0022764	CG8815	Sin3A	Sin3A	36382	3682 // chromatin binding // inferred from electronic annotation /// 3700 // transcription factor activity // inferred from sequence or structural similarity /// 3702 // RNA polymerase II transcription factor activity // non-traceable author statement /// 3712 // transcription cofactor activity // non-traceable author statement /// 5524 // ATP binding // inferred from electronic annotation /// 16…	6357 // regulation of transcription from RNA polymerase II promoter // inferred from electronic annotation /// 7422 // peripheral nervous system development // traceable author statement /// 15986 // ATP synthesis coupled proton transport // inferred from electronic annotation /// 16481 // negative regulation of transcription // inferred from expression pattern /// 45449 // regulation of transcri…	785 // chromatin // inferred from direct assay /// 791 // euchromatin // traceable author statement /// 5634 // nucleus // inferred from direct assay /// 5634 // nucleus // inferred from sequence or structural similarity /// 5634 // nucleus // non-traceable author statement /// 16469 // proton-transporting two-sector ATPase complex // inferred from electronic annotation /// 16580 // Sin3 complex …	IPR003822 // Paired amphipathic helix // 1.8E-14 /// IPR003822 // Paired amphipathic helix // 3.1E-13 /// IPR003822 // Paired amphipathic helix // 3.7E-13
10102	151301_at	0.647986	5.35617	6.68136	1.67045e-07	3.46776e-06	7.18531	FBgn0040827	CG13315	CG13315	CG13315	50300	---	---	---	---
10111	151310_at	0.46834	0.748633	6.68318	1.66194e-07	3.46776e-06	7.19036	FBgn0040837	CG8620	CG8620	CG8620	50310	---	---	---	---
12101	153300_at	0.532939	1.58014	6.6829	1.66323e-07	3.46776e-06	7.18959	FBgn0030048	CG12112	CG12112	CG12112	31794	---	---	---	---
12389	153588_at	0.521569	1.301	6.68381	1.659e-07	3.46776e-06	7.19211	FBgn0035892	CG7127	exo70	exo70	38959	5326 // neurotransmitter transporter activity // inferred from sequence or structural similarity /// 5515 // protein binding // inferred from physical interaction /// 5326 // neurotransmitter transporter activity // inferred from sequence similarity	6886 // intracellular protein transport // inferred from electronic annotation /// 6887 // exocytosis // inferred from sequence or structural similarity /// 7269 // neurotransmitter secretion // non-traceable author statement /// 16080 // synaptic vesicle targeting // inferred from sequence or structural similarity /// 16080 // synaptic vesicle targeting // non-traceable author statement /// 1608…	145 // exocyst // inferred from sequence or structural similarity /// 145 // exocyst // non-traceable author statement /// 145 // exocyst // inferred from electronic annotation /// 145 // exocyst // inferred from sequence similarity	IPR004140 // Exo70 exocyst complex subunit // 1.0E-126
13616	154815_at	0.380982	0.136594	6.68143	1.67015e-07	3.46776e-06	7.18549	FBgn0020633	CG4978	Mcm7	Minichromosome maintenance 7	39014	166 // nucleotide binding // inferred from electronic annotation /// 3678 // DNA helicase activity // inferred from electronic annotation /// 3682 // chromatin binding // inferred from sequence or structural similarity /// 3682 // chromatin binding // non-traceable author statement /// 3688 // DNA replication origin binding // inferred from electronic annotation /// 5524 // ATP binding // inferre…	6267 // pre-replicative complex formation and maintenance // inferred from sequence or structural similarity /// 6267 // pre-replicative complex formation and maintenance // non-traceable author statement /// 6270 // DNA replication initiation // inferred from electronic annotation /// 6267 // pre-replicative complex formation and maintenance // inferred from sequence similarity	5634 // nucleus // inferred from sequence or structural similarity /// 5656 // pre-replicative complex // inferred from sequence or structural similarity /// 5656 // pre-replicative complex // non-traceable author statement /// 5634 // nucleus // inferred from electronic annotation /// 5634 // nucleus // inferred from sequence similarity /// 5656 // pre-replicative complex // inferred from sequen…	IPR001208 // MCM // 1.0E-126
13957	155156_at	0.442953	0.58036	6.6813	1.67076e-07	3.46776e-06	7.18512	FBgn0032925	CG9246	CG9246	CG9246	35386	5351 // sugar porter activity // inferred from electronic annotation	9401 // phosphoenolpyruvate-dependent sugar phosphotransferase system // inferred from electronic annotation	5634 // nucleus // inferred from electronic annotation	IPR005343 // Protein of unknown function UPF0120 // 1.0E-126
12112	153311_at	0.589024	4.65301	6.67953	1.67912e-07	3.47481e-06	7.18019	FBgn0001220	CG8542	Hsc70-5	Heat shock protein cognate 5	36583	5524 // ATP binding // inferred from electronic annotation /// 16887 // ATPase activity // non-traceable author statement /// 51082 // unfolded protein binding // inferred from sequence or structural similarity /// 5515 // protein binding // inferred from physical interaction /// 166 // nucleotide binding // inferred from electronic annotation /// 51082 // unfolded protein binding // inferred fro…	6457 // protein folding // inferred from electronic annotation /// 6457 // protein folding // inferred from sequence or structural similarity /// 6626 // protein targeting to mitochondrion // inferred from electronic annotation /// 6952 // defense response // inferred from electronic annotation /// 9408 // response to heat // non-traceable author statement /// 6986 // response to unfolded protein…	5739 // mitochondrion // inferred from sequence or structural similarity /// 5739 // mitochondrion // non-traceable author statement /// 5739 // mitochondrion // inferred from sequence similarity	IPR001023 // Heat shock protein Hsp70 // 1.0E-126
10538	151737_at	0.539707	3.17897	6.67803	1.68624e-07	3.48126e-06	7.176	FBgn0052210	CG32210	CG32210	CG32210	40127	4842 // ubiquitin-protein ligase activity // inferred from electronic annotation /// 8270 // zinc ion binding // inferred from electronic annotation /// 5488 // binding // inferred from electronic annotation /// 5515 // protein binding // inferred from electronic annotation	16567 // protein ubiquitination // inferred from electronic annotation	151 // ubiquitin ligase complex // inferred from electronic annotation	IPR001841 // Zn-finger, RING // 3.6E-6
8413	149612_at	0.55043	0.756025	6.67234	1.71345e-07	3.52503e-06	7.16017	FBgn0053631	CG33631	CG33631	CG33631	3771784	---	---	---	---
4167	145366_at	0.371112	0.142616	6.67131	1.71846e-07	3.53015e-06	7.15728	FBgn0031016	CG12199	kek5	kekkon5	32930	4601 // peroxidase activity // inferred from electronic annotation /// 16491 // oxidoreductase activity // inferred from electronic annotation	6800 // oxygen and reactive oxygen species metabolism // inferred from electronic annotation /// 6952 // defense response // inferred from electronic annotation /// 7155 // cell adhesion // inferred from electronic annotation /// 19226 // transmission of nerve impulse // inferred from electronic annotation	---	IPR000483 // Cysteine-rich flanking region, C-terminal // 0.0011 /// IPR001611 // Leucine-rich repeat // 0.38 /// IPR001611 // Leucine-rich repeat // 0.0033 /// IPR001611 // Leucine-rich repeat // 0.04 /// IPR001611 // Leucine-rich repeat // 0.25 /// IPR007110 // Immunoglobulin-like // 2.6E-6
11816	153015_i_at	0.759992	3.3312	6.66804	1.73437e-07	3.55762e-06	7.14816	FBgn0051534	CG31534	CG31534	CG31534	40585	8270 // zinc ion binding // inferred from electronic annotation	---	---	IPR001781 // Zn-binding protein, LIM // 2.2E-6
10489	151688_s_at	0.580622	2.16622	6.66363	1.75605e-07	3.58633e-06	7.13588	FBgn0001169	CG5460	H	Hairless	42445	3714 // transcription corepressor activity // inferred from direct assay /// 5515 // protein binding // inferred from physical interaction /// 3677 // DNA binding // inferred from electronic annotation	7219 // Notch signaling pathway // non-traceable author statement /// 8052 // sensory organ determination // inferred from mutant phenotype /// 16360 // sensory organ precursor cell fate determination // inferred from mutant phenotype /// 16360 // sensory organ precursor cell fate determination // traceable author statement /// 45746 // negative regulation of Notch signaling pathway // inferred f…	5634 // nucleus // non-traceable author statement /// 5634 // nucleus // traceable author statement /// 5634 // nucleus // inferred from electronic annotation	---
12442	153641_at	0.395356	0.465395	6.66399	1.75426e-07	3.58633e-06	7.13689	FBgn0036494	CG7250	Toll-6	Toll-6	39663	4675 // transmembrane receptor protein serine/threonine kinase activity // inferred from electronic annotation /// 4888 // transmembrane receptor activity // inferred from sequence or structural similarity /// 4888 // transmembrane receptor activity // non-traceable author statement /// 4888 // transmembrane receptor activity // inferred from electronic annotation /// 4888 // transmembrane recept…	6468 // protein amino acid phosphorylation // inferred from electronic annotation /// 6952 // defense response // non-traceable author statement /// 7155 // cell adhesion // inferred from electronic annotation /// 7165 // signal transduction // inferred from sequence or structural similarity /// 7178 // transmembrane receptor protein serine/threonine kinase signaling pathway // inferred from elec…	5886 // plasma membrane // non-traceable author statement /// 16021 // integral to membrane // inferred from sequence or structural similarity /// 16020 // membrane // inferred from electronic annotation /// 16021 // integral to membrane // inferred from sequence similarity	IPR001611 // Leucine-rich repeat // 9.8E-5 /// IPR001611 // Leucine-rich repeat // 0.0011 /// IPR001611 // Leucine-rich repeat // 0.0064 /// IPR001611 // Leucine-rich repeat // 0.012 /// IPR001611 // Leucine-rich repeat // 0.021 /// IPR001611 // Leucine-rich repeat // 0.0062 /// IPR001611 // Leucine-rich repeat // 0.0031 /// IPR001611 // Leucine-rich repeat // 0.048 /// IPR001611 // Leucine-rich …
320	141519_at	0.369311	0.992056	6.6571	1.78871e-07	3.64243e-06	7.11765	FBgn0037082	CG5664	CG5664	CG5664	40371	---	---	---	---
13286	154485_at	0.422534	2.58016	6.65749	1.78674e-07	3.64243e-06	7.11874	FBgn0001301	CG7210	kel	kelch	35084	3779 // actin binding // inferred from direct assay /// 3779 // actin binding // inferred from sequence or structural similarity /// 3779 // actin binding // non-traceable author statement /// 5515 // protein binding // inferred from physical interaction /// 3779 // actin binding // inferred from electronic annotation /// 5515 // protein binding // inferred from electronic annotation /// 8430 // …	6915 // apoptosis // inferred from electronic annotation /// 7297 // follicle cell migration (sensu Insecta) // inferred from mutant phenotype /// 7301 // ovarian ring canal formation // inferred from direct assay /// 7301 // ovarian ring canal formation // inferred from mutant phenotype /// 7301 // ovarian ring canal formation // non-traceable author statement /// 7303 // cytoplasmic transport, …	5938 // cell cortex // non-traceable author statement /// 35183 // ring canal inner rim // traceable author statement /// 45172 // ring canal (sensu Insecta) // inferred from direct assay /// 45172 // ring canal (sensu Insecta) // non-traceable author statement /// 45172 // ring canal (sensu Insecta) // traceable author statement /// 5856 // cytoskeleton // inferred from electronic annotation	IPR006652 // Kelch repeat // 1.7E-6 /// IPR006652 // Kelch repeat // 1.6E-15 /// IPR006652 // Kelch repeat // 1.1E-18 /// IPR006652 // Kelch repeat // 2.2E-18 /// IPR006652 // Kelch repeat // 1.0E-17 /// IPR006652 // Kelch repeat // 1.0E-15 /// IPR000210 // BTB/POZ domain // 2.7E-45
11522	152721_at	0.526536	2.66617	6.65515	1.79854e-07	3.65711e-06	7.11224	FBgn0020416	CG4472	Idgf1	Imaginal disc growth factor 1	34978	4568 // chitinase activity // inferred from sequence or structural similarity /// 8084 // imaginal disc growth factor activity // inferred from direct assay /// 16799 // hydrolase activity, hydrolyzing N-glycosyl compounds // inferred from electronic annotation /// 4553 // hydrolase activity, hydrolyzing O-glycosyl compounds // inferred from electronic annotation /// 4568 // chitinase activity //…	7165 // signal transduction // inferred from electronic annotation /// 7267 // cell-cell signaling // inferred from electronic annotation /// 7444 // imaginal disc development // inferred from direct assay /// 8152 // metabolism // inferred from electronic annotation /// 5975 // carbohydrate metabolism // inferred from electronic annotation /// 6032 // chitin catabolism // inferred from electroni…	5576 // extracellular region // inferred from direct assay /// 5576 // extracellular region // non-traceable author statement	IPR001223 // Glycoside hydrolase, family 18 // 7.9E-86
8677	149876_at	0.421054	0.261417	6.65062	1.82169e-07	3.67795e-06	7.09959	FBgn0038203	CG14360	Or88a	Odorant receptor 88a	41715	4984 // olfactory receptor activity // non-traceable author statement /// 5549 // odorant binding // inferred from electronic annotation	7608 // sensory perception of smell // non-traceable author statement	16021 // integral to membrane // non-traceable author statement	IPR004117 // Olfactory receptor, Drosophila // 1.4E-90
10097	151296_i_at	0.48851	0.253326	6.65117	1.81887e-07	3.67795e-06	7.10112	---	---	---	---	---	---	---	---	---
1152	142351_at	0.401261	-0.108419	6.64229	1.86501e-07	3.74876e-06	7.07634	FBgn0050053	CG30053	CG30053	CG30053	246419	---	---	---	---
10230	151429_at	0.627956	5.17025	6.63813	1.88704e-07	3.78217e-06	7.06473	FBgn0040968	CG14933	CG14933	CG14933	50442	---	---	---	IPR002350 // Serine protease inhibitor, Kazal type // 8.8E-8
11715	152914_at	0.399229	1.58079	6.63645	1.89595e-07	3.79461e-06	7.06007	FBgn0036684	CG3764	CG3764	CG3764	39902	---	---	---	---
776	141975_at	0.438718	0.292478	6.6354	1.90163e-07	3.80054e-06	7.05712	---	---	---	---	---	---	---	---	---
50	141249_at	0.398606	0.299015	6.61931	1.98995e-07	3.96575e-06	7.01222	FBgn0033740	CG8828	CG8828	CG8828	36364	---	---	---	---
4312	145511_at	0.759013	4.73068	6.61664	2.00503e-07	3.99013e-06	7.00475	FBgn0025683	CG3164	CG3164	CG3164	33171	166 // nucleotide binding // inferred from electronic annotation /// 5215 // transporter activity // inferred from sequence or structural similarity /// 5524 // ATP binding // inferred from electronic annotation /// 42626 // ATPase activity, coupled to transmembrane movement of substances // inferred from sequence or structural similarity /// 16887 // ATPase activity // inferred from electronic a…	6629 // lipid metabolism // inferred from electronic annotation /// 6869 // lipid transport // inferred from electronic annotation	43190 // ATP-binding cassette (ABC) transporter complex // inferred from sequence or structural similarity /// 43190 // ATP-binding cassette (ABC) transporter complex // inferred from sequence similarity	IPR003439 // ABC transporter // 3.1E-37 /// IPR003439 // ABC transporter // 1.4E-18 /// IPR003439 // ABC transporter // 3.1E-37
2911	144110_at	0.357944	0.242723	6.61401	2.01993e-07	4.01407e-06	6.99743	FBgn0026058	CG6352	OdsH	Ods-site homeobox	32758	3700 // transcription factor activity // non-traceable author statement /// 3677 // DNA binding // inferred from electronic annotation /// 3700 // transcription factor activity // inferred from electronic annotation /// 43565 // sequence-specific DNA binding // inferred from electronic annotation	6357 // regulation of transcription from RNA polymerase II promoter // inferred from electronic annotation /// 45449 // regulation of transcription // non-traceable author statement /// 6355 // regulation of transcription, DNA-dependent // inferred from electronic annotation /// 7275 // development // inferred from electronic annotation /// 45449 // regulation of transcription // inferred from el…	5634 // nucleus // non-traceable author statement /// 5634 // nucleus // inferred from electronic annotation	IPR001356 // Homeobox // 1.7E-29 /// IPR001356 // Homeobox // 1.7E-29
11295	152494_at	1.48492	3.67771	6.60913	2.04799e-07	4.06407e-06	6.98379	FBgn0033065	CG8345	Cyp6w1	Cyp6w1	35543	4497 // monooxygenase activity // inferred from electronic annotation /// 16491 // oxidoreductase activity // inferred from electronic annotation /// 5506 // iron ion binding // inferred from electronic annotation /// 20037 // heme binding // inferred from electronic annotation /// 46872 // metal ion binding // inferred from electronic annotation	6118 // electron transport // inferred from electronic annotation	5792 // microsome // non-traceable author statement /// 16020 // membrane // non-traceable author statement /// 5783 // endoplasmic reticulum // inferred from electronic annotation /// 5792 // microsome // inferred from electronic annotation /// 16020 // membrane // inferred from electronic annotation	IPR001128 // Cytochrome P450 // 1.7E-89
9835	151034_at	0.498992	0.0840866	6.60434	2.07588e-07	4.10778e-06	6.97041	---	---	---	---	---	---	---	---	---
3819	145018_at	0.458073	0.852679	6.60288	2.08445e-07	4.11892e-06	6.96634	FBgn0052632	CG32632	CG32632	CG32632	32312	8476 // protein-tyrosine sulfotransferase activity // inferred from sequence or structural similarity /// 8476 // protein-tyrosine sulfotransferase activity // non-traceable author statement /// 8476 // protein-tyrosine sulfotransferase activity // inferred from electronic annotation /// 16740 // transferase activity // inferred from electronic annotation /// 8476 // protein-tyrosine sulfotransfe…	6464 // protein modification // inferred from electronic annotation	16020 // membrane // inferred from electronic annotation /// 16021 // integral to membrane // inferred from electronic annotation	IPR000863 // Sulfotransferase // 6.6E-8
10431	151630_at	0.493912	0.773085	6.59991	2.10201e-07	4.14776e-06	6.95804	FBgn0017590	CG6669	klg	klingon	42707	---	7156 // homophilic cell adhesion // inferred from direct assay /// 7165 // signal transduction // inferred from electronic annotation /// 7611 // learning and/or memory // inferred from mutant phenotype /// 8355 // olfactory learning // inferred from mutant phenotype /// 45466 // R7 cell differentiation // inferred from mutant phenotype	19897 // extrinsic to plasma membrane // inferred from sequence or structural similarity /// 16021 // integral to membrane // inferred from electronic annotation /// 19897 // extrinsic to plasma membrane // inferred from sequence similarity	IPR007110 // Immunoglobulin-like // 3.4E-6 /// IPR007110 // Immunoglobulin-like // 1.3E-6 /// IPR007110 // Immunoglobulin-like // 1.4E-6
6038	147237_at	0.71836	3.11039	6.59706	2.11904e-07	4.17549e-06	6.95006	FBgn0001187	CG8094	Hex-C	Hexokinase C	44008	4396 // hexokinase activity // inferred from direct assay /// 4396 // hexokinase activity // inferred from sequence or structural similarity /// 4396 // hexokinase activity // non-traceable author statement /// 5524 // ATP binding // inferred from electronic annotation /// 166 // nucleotide binding // inferred from electronic annotation /// 4396 // hexokinase activity // inferred from electronic …	6096 // glycolysis // inferred from electronic annotation	---	IPR001312 // Hexokinase // 1.2E-100 /// IPR001312 // Hexokinase // 2.6E-89
11172	152371_at	0.38007	2.09688	6.59585	2.12629e-07	4.18004e-06	6.94668	FBgn0039081 /// FBgn0068135	CG4370	Irk2 /// DyakIrk2	Inwardly rectifying potassium channel 2 /// Irk2	42770	5242 // inward rectifier potassium channel activity // non-traceable author statement /// 15467 // G-protein activated inward rectifier potassium channel activity // inferred from sequence or structural similarity /// 5216 // ion channel activity // inferred from electronic annotation /// 5242 // inward rectifier potassium channel activity // inferred from electronic annotation /// 5244 // voltag…	6812 // cation transport // inferred from electronic annotation /// 6813 // potassium ion transport // inferred from electronic annotation /// 6810 // transport // inferred from electronic annotation /// 6811 // ion transport // inferred from electronic annotation	16020 // membrane // inferred from electronic annotation /// 16021 // integral to membrane // inferred from electronic annotation	IPR001838 // K+ channel, inward rectifier // 1.0E-126 /// IPR001838 // K+ channel, inward rectifier // 1.0E-126
13432	154631_at	0.382263	2.25599	6.59568	2.12731e-07	4.18004e-06	6.94621	FBgn0051342	CG31342	CG31342	CG31342	41592	---	---	---	---
10459	151658_at	0.510418	3.46536	6.5923	2.14772e-07	4.21423e-06	6.93677	FBgn0027356	CG8604	Amph	Amphiphysin	36383	5515 // protein binding // inferred from electronic annotation /// 5515 // protein binding // inferred from physical interaction	6886 // intracellular protein transport // inferred from electronic annotation /// 6887 // exocytosis // traceable author statement /// 6897 // endocytosis // non-traceable author statement /// 6898 // receptor mediated endocytosis // inferred from electronic annotation /// 6937 // regulation of muscle contraction // inferred from mutant phenotype /// 7269 // neurotransmitter secretion // non-tra…	5737 // cytoplasm // inferred from electronic annotation /// 5886 // plasma membrane // inferred from direct assay /// 45202 // synapse // inferred from direct assay	IPR004148 // BAR domain // 1.4E-126 /// IPR001452 // SH3 // 8.3E-15
3906	145105_at	0.597936	5.16381	6.59039	2.15932e-07	4.23106e-06	6.93144	FBgn0030616	CG9091	RpL37a	Ribosomal protein L37a	32446	3676 // nucleic acid binding // inferred from electronic annotation /// 3735 // structural constituent of ribosome // inferred from sequence or structural similarity /// 3735 // structural constituent of ribosome // non-traceable author statement /// 3735 // structural constituent of ribosome // inferred from sequence similarity	6412 // protein biosynthesis // inferred from sequence or structural similarity /// 6412 // protein biosynthesis // inferred from sequence similarity	5840 // ribosome // non-traceable author statement /// 5842 // cytosolic large ribosomal subunit (sensu Eukaryota) // inferred from sequence or structural similarity /// 5842 // cytosolic large ribosomal subunit (sensu Eukaryota) // inferred from sequence similarity	IPR001569 // Ribosomal protein L37e // 1.9E-37
1666	142865_at	0.440118	0.43884	6.58221	2.20983e-07	4.30594e-06	6.90858	FBgn0036754	CG5589	CG5589	CG5589	39979	3729 // mRNA binding // inferred from sequence or structural similarity /// 4004 // ATP-dependent RNA helicase activity // inferred from sequence or structural similarity /// 5524 // ATP binding // inferred from electronic annotation /// 3729 // mRNA binding // inferred from sequence similarity /// 4004 // ATP-dependent RNA helicase activity // inferred from sequence similarity	6139 // nucleobase, nucleoside, nucleotide and nucleic acid metabolism // inferred from electronic annotation	---	IPR001650 // Helicase, C-terminal // 1.5E-33 /// IPR001410 // DEAD/DEAH box helicase // 3.6E-62
6602	147801_at	0.375487	-0.525893	6.57502	2.25521e-07	4.36646e-06	6.88847	FBgn0034899	CG13560	CG13560	CG13560	37758	---	---	---	---
8896	150095_at	0.421872	0.0537586	6.57482	2.25647e-07	4.36646e-06	6.88792	FBgn0038540	CG14321	CG14321	CG14321	42134	---	---	---	---
12098	153297_at	0.3566	1.67884	6.5749	2.25597e-07	4.36646e-06	6.88814	FBgn0037369	CG2100	CG2100	CG2100	40707	4652 // polynucleotide adenylyltransferase activity // inferred from sequence or structural similarity /// 8143 // poly(A) binding // inferred from electronic annotation /// 3723 // RNA binding // inferred from electronic annotation /// 16740 // transferase activity // inferred from electronic annotation /// 16779 // nucleotidyltransferase activity // inferred from electronic annotation /// 4652 …	6378 // mRNA polyadenylylation // inferred from electronic annotation /// 6396 // RNA processing // inferred from electronic annotation	---	IPR002646 // Polynucleotide adenylyltransferase // 4.5E-40 /// IPR002646 // Polynucleotide adenylyltransferase // 1.4E-34
1631	142830_at	0.518219	2.19411	6.56862	2.29639e-07	4.43146e-06	6.87058	FBgn0001316	CG17046	klar	klarsicht	38067	5215 // transporter activity // inferred from electronic annotation /// 5515 // protein binding // inferred from physical interaction /// 42623 // ATPase activity, coupled // inferred from sequence or structural similarity /// 3779 // actin binding // inferred from electronic annotation /// 42623 // ATPase activity, coupled // inferred from sequence similarity	7018 // microtubule-based movement // inferred from sequence or structural similarity /// 7097 // nuclear migration // inferred from mutant phenotype /// 7097 // nuclear migration // traceable author statement /// 7431 // salivary gland development // traceable author statement /// 16044 // membrane organization and biogenesis // traceable author statement /// 42051 // eye photoreceptor developme…	5635 // nuclear envelope // inferred from direct assay /// 16020 // membrane // inferred from electronic annotation /// 30286 // dynein complex // inferred from sequence or structural similarity /// 16021 // integral to membrane // inferred from electronic annotation /// 30286 // dynein complex // inferred from sequence similarity	---
8637	149836_at	0.425604	2.22601	6.56791	2.301e-07	4.43426e-06	6.8686	FBgn0038142	CG14379	CheA87a	CheA87a	41642	---	---	---	---
12499	153698_at	0.488514	2.50867	6.56459	2.32269e-07	4.45765e-06	6.85932	FBgn0032988 /// FBgn0068019	CG3278	Tif-IA /// DyakTif-IA	Tif-IA /// Tif-IA	35454	3701 // RNA polymerase I transcription factor activity // inferred from sequence or structural similarity /// 16251 // general RNA polymerase II transcription factor activity // inferred from electronic annotation /// 5515 // protein binding // inferred from physical interaction /// 3701 // RNA polymerase I transcription factor activity // inferred from sequence similarity	6356 // regulation of transcription from RNA polymerase I promoter // inferred from sequence or structural similarity /// 6367 // transcription initiation from RNA polymerase II promoter // inferred from electronic annotation /// 6356 // regulation of transcription from RNA polymerase I promoter // inferred from sequence similarity	5736 // DNA-directed RNA polymerase I complex // inferred from sequence or structural similarity /// 5736 // DNA-directed RNA polymerase I complex // inferred from sequence similarity	IPR007991 // RNA polymerase I specific transcription initiation factor RRN3 // 1.0E-126
8619	149818_at	0.276377	-0.405882	6.56043	2.35017e-07	4.49394e-06	6.84769	FBgn0038118	CG7855	timeout	timeout	41615	---	7275 // development // inferred from electronic annotation /// 19226 // transmission of nerve impulse // inferred from electronic annotation	---	IPR006906 // Timeless protein // 1.0E-126 /// IPR007725 // Timeless C-terminal // 1.0E-126
12953	154152_at	0.751929	2.82596	6.56027	2.35122e-07	4.49394e-06	6.84725	FBgn0020240	CG7586	Mcr	Macroglobulin complement-related	44071	4866 // endopeptidase inhibitor activity // inferred from sequence or structural similarity /// 4867 // serine-type endopeptidase inhibitor activity // inferred from electronic annotation /// 5125 // cytokine activity // inferred from electronic annotation /// 5515 // protein binding // inferred from physical interaction /// 4866 // endopeptidase inhibitor activity // inferred from electronic ann…	6508 // proteolysis // inferred from electronic annotation /// 6952 // defense response // inferred from electronic annotation /// 7165 // signal transduction // inferred from electronic annotation /// 7267 // cell-cell signaling // inferred from electronic annotation	---	IPR002172 // Low density lipoprotein-receptor, class A // 5.7E-8 /// IPR001599 // Alpha-2-macroglobulin // 3.8E-50 /// IPR002890 // Alpha-2-macroglobulin, N-terminal // 7.0E-14 /// IPR002890 // Alpha-2-macroglobulin, N-terminal // 1.1E-14
10160	151359_at	0.444302	-0.305066	6.55268	2.40226e-07	4.579e-06	6.82602	---	---	---	---	---	---	---	---	---
11291	152490_at	0.744422	3.89104	6.54748	2.43787e-07	4.63427e-06	6.81147	FBgn0015777	CG9261	nrv2	nervana 2	33953	5391 // sodium:potassium-exchanging ATPase activity // inferred from sequence or structural similarity /// 5391 // sodium:potassium-exchanging ATPase activity // non-traceable author statement /// 16820 // hydrolase activity, acting on acid anhydrides, catalyzing transmembrane movement of substances // inferred from electronic annotation /// 5391 // sodium:potassium-exchanging ATPase activity // …	6812 // cation transport // inferred from electronic annotation /// 6813 // potassium ion transport // inferred from electronic annotation /// 6814 // sodium ion transport // inferred from electronic annotation /// 7424 // tracheal system development (sensu Insecta) // inferred from mutant phenotype /// 19991 // septate junction assembly // inferred from mutant phenotype /// 35151 // regulation o…	5886 // plasma membrane // inferred from sequence or structural similarity /// 5890 // sodium:potassium-exchanging ATPase complex // inferred from sequence or structural similarity /// 16020 // membrane // inferred from electronic annotation /// 16021 // integral to membrane // inferred from electronic annotation /// 5886 // plasma membrane // inferred from sequence similarity /// 5890 // sodium:…	IPR000402 // Na+/K+ ATPase, beta subunit // 8.5E-58 /// IPR000402 // Na+/K+ ATPase, beta subunit // 4.6E-62
59	141258_at	0.495371	1.06225	6.54674	2.44295e-07	4.63763e-06	6.80941	FBgn0033059	CG7845	CG7845	CG7845	35536	5515 // protein binding // inferred from physical interaction	---	---	IPR001680 // G-protein beta WD-40 repeat // 0.075 /// IPR001680 // G-protein beta WD-40 repeat // 2.2E-5
10018	151217_at	0.552472	1.17064	6.5405	2.4865e-07	4.70121e-06	6.79194	---	---	---	---	---	---	---	---	---
12945	154144_at	0.456732	1.73107	6.53762	2.50681e-07	4.72683e-06	6.7839	FBgn0030142	CG3004	CG3004	CG3004	31903	3729 // mRNA binding // inferred from electronic annotation /// 3924 // GTPase activity // inferred from sequence or structural similarity /// 5515 // protein binding // inferred from physical interaction /// 3924 // GTPase activity // inferred from sequence similarity	16072 // rRNA metabolism // inferred from electronic annotation	5834 // heterotrimeric G-protein complex // inferred from sequence or structural similarity /// 5834 // heterotrimeric G-protein complex // inferred from sequence similarity	IPR001680 // G-protein beta WD-40 repeat // 0.0018 /// IPR001680 // G-protein beta WD-40 repeat // 0.1 /// IPR001680 // G-protein beta WD-40 repeat // 7.1E-6 /// IPR001680 // G-protein beta WD-40 repeat // 2.5E-4 /// IPR001680 // G-protein beta WD-40 repeat // 0.0042 /// IPR001680 // G-protein beta WD-40 repeat // 1.5E-9 /// IPR001680 // G-protein beta WD-40 repeat // 9.4E-6
11417	152616_at	0.474192	3.93727	6.53396	2.53291e-07	4.76962e-06	6.77366	---	CG9008	---	---	---	4034 // aldose 1-epimerase activity // inferred from electronic annotation	6012 // galactose metabolism // inferred from electronic annotation	---	IPR008183 // Aldose 1-epimerase // 5.1E-59 /// IPR008183 // Aldose 1-epimerase // 1.7E-30
13562	154761_at	0.43006	3.17414	6.53296	2.54013e-07	4.77681e-06	6.77084	FBgn0032956	CG1512	cul-2	cul-2	35420	---	74 // regulation of progression through cell cycle // inferred from electronic annotation /// 6508 // proteolysis // inferred from electronic annotation /// 7049 // cell cycle // inferred from electronic annotation	152 // nuclear ubiquitin ligase complex // inferred from sequence or structural similarity /// 152 // nuclear ubiquitin ligase complex // inferred from sequence similarity	IPR001373 // Cullin // 1.0E-126
10496	151695_at	0.490614	0.711559	6.53204	2.54676e-07	4.78286e-06	6.76826	---	---	---	---	---	42802 // identical protein binding // inferred from physical interaction	1763 // morphogenesis of a branching structure // non-traceable author statement /// 7369 // gastrulation // non-traceable author statement /// 7424 // tracheal system development (sensu Insecta) // non-traceable author statement /// 7427 // tracheal epithelial cell migration (sensu Insecta) // traceable author statement /// 7428 // primary tracheal branching (sensu Insecta) // traceable author s…	5622 // intracellular // traceable author statement /// 5737 // cytoplasm // non-traceable author statement /// 5737 // cytoplasm // traceable author statement	---
13194	154393_at	0.60125	1.72262	6.52498	2.59817e-07	4.85986e-06	6.7485	FBgn0032138	CG4364	CG4364	CG4364	34287	3676 // nucleic acid binding // inferred from electronic annotation /// 3729 // mRNA binding // inferred from electronic annotation /// 3735 // structural constituent of ribosome // inferred from electronic annotation	6139 // nucleobase, nucleoside, nucleotide and nucleic acid metabolism // inferred from electronic annotation /// 6461 // protein complex assembly // inferred from electronic annotation /// 16072 // rRNA metabolism // inferred from electronic annotation /// 19538 // protein metabolism // inferred from electronic annotation /// 8283 // cell proliferation // inferred from electronic annotation	5622 // intracellular // inferred from electronic annotation /// 5730 // nucleolus // inferred from electronic annotation	IPR001357 // BRCT // 1.0E-12 /// IPR010613 // Pescadillo, N-terminal // 1.0E-126
10421	151620_at	0.557514	3.96621	6.51586	2.66611e-07	4.97366e-06	6.72298	---	---	---	---	---	5515 // protein binding // inferred from physical interaction /// 3755 // peptidyl-prolyl cis-trans isomerase activity // inferred from electronic annotation /// 16853 // isomerase activity // inferred from electronic annotation	31532 // actin cytoskeleton reorganization // inferred from mutant phenotype /// 6457 // protein folding // inferred from electronic annotation /// 915 // cytokinesis, contractile ring formation // non-traceable author statement	5813 // centrosome // traceable author statement	---
10028	151227_f_at	0.469336	0.518383	6.50874	2.7204e-07	5.0682e-06	6.70305	FBgn0005613	CG8404	Sox15	Sox box protein 15	36575	3700 // transcription factor activity // inferred from sequence or structural similarity /// 4812 // aminoacyl-tRNA ligase activity // inferred from electronic annotation /// 5524 // ATP binding // inferred from electronic annotation /// 3677 // DNA binding // inferred from electronic annotation /// 3700 // transcription factor activity // inferred from sequence similarity	6357 // regulation of transcription from RNA polymerase II promoter // inferred from electronic annotation /// 6418 // tRNA aminoacylation for protein translation // inferred from electronic annotation /// 7398 // ectoderm development // inferred from electronic annotation /// 7399 // nervous system development // inferred from electronic annotation /// 45449 // regulation of transcription // inf…	5634 // nucleus // inferred from sequence or structural similarity /// 5634 // nucleus // non-traceable author statement /// 5634 // nucleus // inferred from electronic annotation /// 5634 // nucleus // inferred from sequence similarity	IPR000910 // HMG1/2 (high mobility group) box // 1.1E-31
10186	151385_at	0.634389	0.453423	6.50826	2.7241e-07	5.06834e-06	6.70171	FBgn0052758	CG32758	CG32758	CG32758	31493	5515 // protein binding // inferred from electronic annotation /// 5515 // protein binding // inferred from physical interaction /// 35091 // phosphoinositide binding // inferred from electronic annotation	7165 // signal transduction // inferred from electronic annotation /// 7242 // intracellular signaling cascade // inferred from electronic annotation	---	IPR001478 // PDZ/DHR/GLGF domain // 3.3E-17 /// IPR000159 // RA domain // 1.7E-19 /// IPR001683 // Phox-like // 1.7E-28
1449	142648_at	0.394985	0.0475099	6.50599	2.74167e-07	5.09427e-06	6.69535	FBgn0036629	CG4573	CG4573	CG4573	39828	4818 // glutamate-tRNA ligase activity // inferred from sequence or structural similarity /// 5524 // ATP binding // inferred from electronic annotation /// 4812 // aminoacyl-tRNA ligase activity // inferred from electronic annotation /// 4818 // glutamate-tRNA ligase activity // inferred from electronic annotation /// 4818 // glutamate-tRNA ligase activity // inferred from sequence similarity	6418 // tRNA aminoacylation for protein translation // inferred from electronic annotation /// 6424 // glutamyl-tRNA aminoacylation // inferred from electronic annotation /// 6412 // protein biosynthesis // inferred from electronic annotation	5737 // cytoplasm // inferred from electronic annotation /// 17101 // aminoacyl-tRNA synthetase multienzyme complex // inferred from electronic annotation	IPR000924 // Glutamyl-tRNA synthetase, class Ic // 2.1E-121
12405	153604_at	0.47181	2.52861	6.50247	2.76921e-07	5.13863e-06	6.68547	FBgn0037933	CG14716	Ho	Heme oxygenase	41407	4392 // heme oxygenase (decyclizing) activity // inferred from direct assay /// 4392 // heme oxygenase (decyclizing) activity // inferred from sequence or structural similarity /// 4392 // heme oxygenase (decyclizing) activity // inferred from electronic annotation /// 4392 // heme oxygenase (decyclizing) activity // inferred from sequence similarity	6788 // heme oxidation // inferred from electronic annotation	---	IPR002051 // Heme oxygenase // 1.7E-78
7278	148477_at	0.419196	0.197842	6.49542	2.82506e-07	5.22459e-06	6.66573	FBgn0036018	CG3335	CG3335	CG3335	39119	3729 // mRNA binding // inferred from sequence or structural similarity /// 4386 // helicase activity // inferred from sequence or structural similarity /// 166 // nucleotide binding // inferred from electronic annotation /// 3676 // nucleic acid binding // inferred from electronic annotation /// 3729 // mRNA binding // inferred from sequence similarity /// 4386 // helicase activity // inferred f…	---	---	IPR000504 // RNA-binding region RNP-1 (RNA recognition motif) // 1.2E-17 /// IPR000504 // RNA-binding region RNP-1 (RNA recognition motif) // 6.8E-5 /// IPR000504 // RNA-binding region RNP-1 (RNA recognition motif) // 1.0E-21 /// IPR000504 // RNA-binding region RNP-1 (RNA recognition motif) // 2.2E-5 /// IPR000504 // RNA-binding region RNP-1 (RNA recognition motif) // 1.1E-8 /// IPR000504 // RNA-…
2968	144167_at	0.446122	0.798006	6.48371	2.92036e-07	5.35527e-06	6.63293	FBgn0026878	CG4325	CG4325	CG4325	31167	5515 // protein binding // inferred from electronic annotation /// 8270 // zinc ion binding // inferred from electronic annotation /// 46872 // metal ion binding // inferred from electronic annotation	6512 // ubiquitin cycle // inferred from electronic annotation	5634 // nucleus // inferred from electronic annotation	IPR001841 // Zn-finger, RING // 2.4E-12
9910	151109_at	0.434428	-0.459205	6.48033	2.94845e-07	5.39267e-06	6.62346	FBgn0040622	CG11517	CG11517	CG11517	50095	---	---	---	IPR003961 // Fibronectin, type III // 3.3E-5
4933	146132_at	0.536447	4.17325	6.47779	2.96978e-07	5.4246e-06	6.61634	FBgn0032200	CG5676	CG5676	CG5676	34368	---	---	---	IPR007014 // FUN14 family // 2.8E-56
8604	149803_at	0.39611	-0.291969	6.47288	3.01142e-07	5.47212e-06	6.60257	FBgn0038087	CG10134	beat-Va	beat-Va	41578	---	---	5576 // extracellular region // non-traceable author statement	---
8046	149245_at	0.51239	-0.315447	6.46768	3.05621e-07	5.53913e-06	6.58798	FBgn0037178	CG12546	CG12546	CG12546	40483	---	---	---	---
10731	151930_at	0.743313	4.99359	6.46331	3.09428e-07	5.60089e-06	6.57574	FBgn0015324	CG1088	Vha26	Vacuolar H<up>+</up>-ATPase 26kD E subunit	40679	8553 // hydrogen-exporting ATPase activity, phosphorylative mechanism // inferred from sequence or structural similarity /// 8553 // hydrogen-exporting ATPase activity, phosphorylative mechanism // non-traceable author statement /// 46933 // hydrogen-transporting ATP synthase activity, rotational mechanism // inferred from electronic annotation /// 46961 // hydrogen-transporting ATPase activity, …	15986 // ATP synthesis coupled proton transport // inferred from electronic annotation /// 15992 // proton transport // non-traceable author statement /// 6754 // ATP biosynthesis // inferred from electronic annotation /// 6810 // transport // inferred from electronic annotation /// 6811 // ion transport // inferred from electronic annotation /// 15992 // proton transport // inferred from electro…	221 // hydrogen-transporting ATPase V1 domain // inferred from sequence or structural similarity /// 221 // hydrogen-transporting ATPase V1 domain // non-traceable author statement /// 16469 // proton-transporting two-sector ATPase complex // inferred from electronic annotation /// 221 // hydrogen-transporting ATPase V1 domain // inferred from sequence similarity	IPR002842 // H+-transporting two-sector ATPase, E subunit // 4.0E-109
8843	150042_at	0.417881	-0.0561447	6.46092	3.1153e-07	5.62441e-06	6.56905	FBgn0038468	CG5225	CG5225	CG5225	42053	---	6817 // phosphate transport // inferred from electronic annotation	5737 // cytoplasm // inferred from electronic annotation	IPR008160 // Collagen triple helix repeat // 2.7E-14
2383	143582_at	0.476127	4.82665	6.45202	3.19494e-07	5.7386e-06	6.54409	FBgn0010078	CG3661	RpL23	Ribosomal protein L23	37628	3676 // nucleic acid binding // inferred from electronic annotation /// 3735 // structural constituent of ribosome // inferred from sequence or structural similarity /// 3735 // structural constituent of ribosome // non-traceable author statement /// 3735 // structural constituent of ribosome // inferred from sequence similarity	6412 // protein biosynthesis // inferred from sequence or structural similarity /// 6412 // protein biosynthesis // non-traceable author statement /// 6412 // protein biosynthesis // inferred from sequence similarity	5840 // ribosome // non-traceable author statement /// 5842 // cytosolic large ribosomal subunit (sensu Eukaryota) // inferred from sequence or structural similarity /// 5842 // cytosolic large ribosomal subunit (sensu Eukaryota) // non-traceable author statement /// 5842 // cytosolic large ribosomal subunit (sensu Eukaryota) // inferred from sequence similarity	IPR000218 // Ribosomal protein L14b/L23e // 1.4E-59
664	141863_at	0.442607	0.340592	6.44781	3.23336e-07	5.79276e-06	6.53228	FBgn0037888	CG17210	scpr-B	SCP-containing protein B	41357	5515 // protein binding // inferred from physical interaction	---	5576 // extracellular region // inferred from electronic annotation	IPR001283 // Allergen V5/Tpx-1 related // 1.3E-27
10605	151804_at	0.454818	5.26271	6.4472	3.239e-07	5.79545e-06	6.53055	FBgn0037637	CG9836	CG9836	CG9836	41059	5515 // protein binding // inferred from physical interaction	6807 // nitrogen compound metabolism // inferred from electronic annotation /// 19740 // nitrogen utilization // inferred from electronic annotation	---	IPR002871 // Nitrogen-fixing NifU-like, N-terminal // 2.9E-81
10060	151259_at	0.561254	-0.242458	6.4416	3.29087e-07	5.84374e-06	6.51485	---	---	---	---	---	---	---	---	---
11141	152340_at	0.630134	1.53529	6.44283	3.2794e-07	5.84374e-06	6.5183	FBgn0004837	CG3497	Su(H)	Suppressor of Hairless	34881	3677 // DNA binding // non-traceable author statement /// 3677 // DNA binding // traceable author statement /// 3702 // RNA polymerase II transcription factor activity // inferred from sequence or structural similarity /// 5215 // transporter activity // inferred from electronic annotation /// 5515 // protein binding // traceable author statement /// 16563 // transcriptional activator activity //…	1709 // cell fate determination // traceable author statement /// 6310 // DNA recombination // inferred from electronic annotation /// 6367 // transcription initiation from RNA polymerase II promoter // inferred from electronic annotation /// 6810 // transport // inferred from electronic annotation /// 7219 // Notch signaling pathway // inferred from genetic interaction /// 7219 // Notch signalin…	5634 // nucleus // inferred from direct assay /// 5634 // nucleus // inferred from sequence or structural similarity /// 5634 // nucleus // traceable author statement /// 5737 // cytoplasm // inferred from direct assay /// 5634 // nucleus // inferred from electronic annotation /// 5634 // nucleus // inferred from sequence similarity	IPR002909 // Cell surface receptor IPT/TIG // 1.2E-13
593	141792_at	0.363212	1.11362	6.43792	3.32545e-07	5.89741e-06	6.50452	FBgn0034748	CG17807	CG17807	CG17807	37585	166 // nucleotide binding // inferred from electronic annotation /// 8168 // methyltransferase activity // inferred from electronic annotation /// 8757 // S-adenosylmethionine-dependent methyltransferase activity // inferred from electronic annotation	---	---	IPR005123 // 2OG-Fe(II) oxygenase superfamily // 4.1E-14
2387	143586_at	0.677264	4.17303	6.43645	3.33932e-07	5.91452e-06	6.5004	FBgn0010217	CG11154	ATPsyn-	ATP synthase-	43829	166 // nucleotide binding // inferred from electronic annotation /// 5524 // ATP binding // inferred from electronic annotation /// 8553 // hydrogen-exporting ATPase activity, phosphorylative mechanism // inferred from sequence or structural similarity /// 46933 // hydrogen-transporting ATP synthase activity, rotational mechanism // inferred from electronic annotation /// 46961 // hydrogen-transp…	6144 // purine base metabolism // inferred from electronic annotation /// 6754 // ATP biosynthesis // inferred from electronic annotation /// 6928 // cell motility // inferred from electronic annotation /// 7010 // cytoskeleton organization and biogenesis // inferred from electronic annotation /// 15986 // ATP synthesis coupled proton transport // inferred from electronic annotation /// 15992 // …	275 // proton-transporting ATP synthase complex, catalytic core F(1) (sensu Eukaryota) // inferred from sequence or structural similarity /// 5739 // mitochondrion // inferred from electronic annotation /// 16021 // integral to membrane // inferred from electronic annotation /// 16469 // proton-transporting two-sector ATPase complex // inferred from electronic annotation /// 45255 // hydrogen-tra…	IPR004100 // H+-transporting two-sector ATPase, alpha/beta subunit, N-terminal // 3.0E-31 /// IPR000194 // H+-transporting two-sector ATPase, alpha/beta subunit, central region // 3.8E-85 /// IPR000793 // H+-transporting two-sector ATPase, alpha/beta subunit, C-terminal // 1.2E-51
12661	153860_at	0.553241	0.952407	6.43572	3.34624e-07	5.9193e-06	6.49836	FBgn0037066	CG7752	Z4	Z4	40351	3676 // nucleic acid binding // inferred from electronic annotation /// 3677 // DNA binding // non-traceable author statement /// 8270 // zinc ion binding // inferred from electronic annotation /// 5515 // protein binding // inferred from physical interaction /// 46872 // metal ion binding // inferred from electronic annotation	6325 // establishment and/or maintenance of chromatin architecture // non-traceable author statement	5634 // nucleus // inferred from electronic annotation /// 5705 // polytene chromosome interband // non-traceable author statement	---
13358	154557_at	0.572899	1.18082	6.42357	3.46363e-07	6.08852e-06	6.46427	FBgn0035997	CG3445	phol	pleiohomeotic like	39095	3676 // nucleic acid binding // inferred from electronic annotation /// 3677 // DNA binding // traceable author statement /// 8270 // zinc ion binding // inferred from electronic annotation /// 30528 // transcription regulator activity // inferred from electronic annotation /// 46872 // metal ion binding // inferred from electronic annotation	6357 // regulation of transcription from RNA polymerase II promoter // inferred from electronic annotation /// 16458 // gene silencing // inferred from genetic interaction	5634 // nucleus // inferred from electronic annotation	IPR007087 // Zn-finger, C2H2 type // 1.1E-4 /// IPR007087 // Zn-finger, C2H2 type // 2.0E-6 /// IPR007087 // Zn-finger, C2H2 type // 7.7E-6 /// IPR007087 // Zn-finger, C2H2 type // 1.9E-6
10597	151796_at	0.412156	0.175552	6.41822	3.51671e-07	6.15864e-06	6.44924	FBgn0023489	CG2819	Pph13	PvuII-PstI homology 13	33239	3700 // transcription factor activity // inferred from sequence or structural similarity /// 3702 // RNA polymerase II transcription factor activity // non-traceable author statement /// 3677 // DNA binding // inferred from electronic annotation /// 3700 // transcription factor activity // inferred from electronic annotation /// 43565 // sequence-specific DNA binding // inferred from electronic a…	6357 // regulation of transcription from RNA polymerase II promoter // inferred from electronic annotation /// 45449 // regulation of transcription // inferred from sequence or structural similarity /// 6355 // regulation of transcription, DNA-dependent // inferred from electronic annotation /// 7275 // development // inferred from electronic annotation /// 45449 // regulation of transcription //…	5634 // nucleus // inferred from sequence or structural similarity /// 5634 // nucleus // inferred from electronic annotation /// 5634 // nucleus // inferred from sequence similarity	IPR001356 // Homeobox // 3.1E-30
7754	148953_at	0.460511	0.739507	6.4135	3.56412e-07	6.22256e-06	6.436	---	CG32176	---	---	---	---	---	---	---
1069	142268_at	0.521617	1.06412	6.41271	3.5722e-07	6.22468e-06	6.43377	FBgn0051752	CG31752	CG31752	CG31752	35143	---	---	---	---
484	141683_at	0.597835	1.27711	6.41116	3.58793e-07	6.23659e-06	6.42942	FBgn0038872	CG5874	CG5874	CG5874	42520	3729 // mRNA binding // inferred from sequence or structural similarity /// 3723 // RNA binding // inferred from sequence or structural similarity /// 3729 // mRNA binding // inferred from sequence similarity	7070 // negative regulation of transcription from RNA polymerase II promoter, mitotic // inferred from sequence or structural similarity /// 6350 // transcription // inferred from electronic annotation /// 6355 // regulation of transcription, DNA-dependent // inferred from electronic annotation /// 7070 // negative regulation of transcription from RNA polymerase II promoter, mitotic // inferred f…	17053 // transcriptional repressor complex // inferred from sequence or structural similarity /// 5634 // nucleus // inferred from electronic annotation /// 17053 // transcriptional repressor complex // inferred from sequence similarity	---
10630	151829_at	0.442919	0.482967	6.39516	3.75479e-07	6.47043e-06	6.38449	FBgn0034088	CG8445	CG8445	CG8445	36794	4221 // ubiquitin thiolesterase activity // non-traceable author statement /// 4221 // ubiquitin thiolesterase activity // inferred from electronic annotation	6511 // ubiquitin-dependent protein catabolism // inferred from electronic annotation	5622 // intracellular // inferred from electronic annotation	IPR001578 // Peptidase C12, ubiquitin carboxyl-terminal hydrolase family 1 // 1.8E-116
552	141751_at	0.598303	0.747466	6.3912	3.79724e-07	6.53555e-06	6.37338	FBgn0010110	CG4399	east	enhanced adult sensory threshold	46006	4182 // carboxypeptidase A activity // inferred from electronic annotation	89 // mitotic metaphase // inferred from mutant phenotype /// 705 // achiasmate meiosis I // inferred from mutant phenotype /// 6508 // proteolysis // inferred from electronic annotation /// 16321 // female meiosis chromosome segregation // inferred from mutant phenotype	228 // nuclear chromosome // inferred from direct assay /// 5634 // nucleus // inferred from direct assay /// 5634 // nucleus // non-traceable author statement /// 5730 // nucleolus // inferred from direct assay /// 5634 // nucleus // inferred from electronic annotation	---
11602	152801_at	0.988217	4.52015	6.38747	3.83769e-07	6.58091e-06	6.36291	FBgn0001125	CG4233	Got2	Glutamate oxaloacetate transaminase 2	33373	4069 // aspartate transaminase activity // inferred from direct assay /// 4069 // aspartate transaminase activity // inferred from sequence or structural similarity /// 4069 // aspartate transaminase activity // non-traceable author statement /// 3824 // catalytic activity // inferred from electronic annotation /// 8483 // transaminase activity // inferred from electronic annotation /// 16769 // …	6531 // aspartate metabolism // inferred from sequence or structural similarity /// 6537 // glutamate biosynthesis // inferred from mutant phenotype /// 6537 // glutamate biosynthesis // traceable author statement /// 7416 // synaptogenesis // inferred from mutant phenotype /// 45213 // neurotransmitter receptor metabolism // inferred from mutant phenotype /// 6520 // amino acid metabolism // inf…	5739 // mitochondrion // inferred from sequence or structural similarity /// 5759 // mitochondrial matrix // inferred from sequence or structural similarity /// 5739 // mitochondrion // inferred from sequence similarity /// 5759 // mitochondrial matrix // inferred from sequence similarity	IPR004839 // Aminotransferase, class I and II // 2.4E-95 /// IPR004839 // Aminotransferase, class I and II // 2.4E-95
2477	143676_at	0.373225	0.0922043	6.38484	3.8665e-07	6.61412e-06	6.35552	FBgn0011676	CG6713	Nos	Nitric oxide synthase	34495	4517 // nitric-oxide synthase activity // inferred from direct assay /// 4517 // nitric-oxide synthase activity // inferred from mutant phenotype /// 4517 // nitric-oxide synthase activity // inferred from sequence or structural similarity /// 4517 // nitric-oxide synthase activity // traceable author statement /// 5516 // calmodulin binding // non-traceable author statement /// 10181 // FMN bind…	6118 // electron transport // inferred from electronic annotation /// 6809 // nitric oxide biosynthesis // traceable author statement /// 6952 // defense response // non-traceable author statement /// 7263 // nitric oxide mediated signal transduction // inferred from electronic annotation /// 7416 // synaptogenesis // traceable author statement /// 7444 // imaginal disc development // traceable a…	---	IPR008254 // Flavodoxin/nitric oxide synthase // 5.8E-52 /// IPR001433 // Oxidoreductase FAD/NAD(P)-binding // 8.1E-28 /// IPR003097 // FAD-binding // 8.2E-70 /// IPR004030 // Nitric oxide synthase, NOS // 1.0E-126
6099	147298_at	0.396204	-0.181048	6.3783	3.9391e-07	6.7219e-06	6.33713	FBgn0034106	CG9068	CG9068	CG9068	36817	3774 // motor activity // inferred from sequence or structural similarity /// 3777 // microtubule motor activity // inferred from electronic annotation /// 5200 // structural constituent of cytoskeleton // inferred from electronic annotation /// 3774 // motor activity // inferred from sequence similarity	6928 // cell motility // inferred from electronic annotation /// 7010 // cytoskeleton organization and biogenesis // inferred from electronic annotation	5875 // microtubule associated complex // inferred from sequence or structural similarity /// 5875 // microtubule associated complex // inferred from sequence similarity	---
2431	143630_at	0.487958	0.167473	6.3731	3.99776e-07	6.79716e-06	6.32252	---	---	---	---	---	166 // nucleotide binding // inferred from electronic annotation /// 5524 // ATP binding // inferred from electronic annotation /// 16887 // ATPase activity // inferred from electronic annotation /// 17111 // nucleoside-triphosphatase activity // inferred from electronic annotation /// 42626 // ATPase activity, coupled to transmembrane movement of substances // inferred from electronic annotation…	7275 // development // inferred from mutant phenotype /// 6810 // transport // inferred from electronic annotation /// 7275 // development // inferred from electronic annotation /// 6810 // transport // non-traceable author statement	16020 // membrane // inferred from electronic annotation /// 16021 // integral to membrane // inferred from electronic annotation /// 16021 // integral to membrane // non-traceable author statement	---
12207	153406_at	0.589237	2.2027	6.3722	4.00795e-07	6.80622e-06	6.32001	FBgn0017578	CG9648	Max	Max	40095	3700 // transcription factor activity // inferred from direct assay /// 3700 // transcription factor activity // inferred from sequence or structural similarity /// 5515 // protein binding // inferred from physical interaction /// 3677 // DNA binding // inferred from electronic annotation /// 30528 // transcription regulator activity // inferred from electronic annotation /// 3700 // transcriptio…	6355 // regulation of transcription, DNA-dependent // inferred from direct assay /// 6357 // regulation of transcription from RNA polymerase II promoter // inferred from electronic annotation /// 45449 // regulation of transcription // inferred from sequence or structural similarity /// 6350 // transcription // inferred from electronic annotation /// 6355 // regulation of transcription, DNA-depen…	5634 // nucleus // Unknown /// 5634 // nucleus // inferred from sequence or structural similarity /// 5634 // nucleus // inferred from electronic annotation /// 5634 // nucleus // inferred from curator /// 5634 // nucleus // inferred from sequence similarity	IPR001092 // Basic helix-loop-helix dimerization domain bHLH // 4.2E-18
2951	144150_at	0.453325	2.5856	6.36918	4.04257e-07	6.85672e-06	6.31151	FBgn0026619	CG8766	tafazzin	tafazzin	36405	8415 // acyltransferase activity // inferred from electronic annotation /// 5515 // protein binding // inferred from physical interaction	8152 // metabolism // inferred from electronic annotation	16020 // membrane // inferred from electronic annotation /// 16021 // integral to membrane // inferred from electronic annotation /// 16021 // integral to membrane // non-traceable author statement	IPR002123 // Phospholipid/glycerol acyltransferase // 4.0E-16 /// IPR002123 // Phospholipid/glycerol acyltransferase // 4.0E-16 /// IPR002123 // Phospholipid/glycerol acyltransferase // 4.0E-16
4561	145760_at	0.493122	0.572394	6.36742	4.06278e-07	6.87435e-06	6.30658	FBgn0031604	CG15433	CG15433	CG15433	33649	5506 // iron ion binding // inferred from electronic annotation /// 8080 // N-acetyltransferase activity // inferred from electronic annotation /// 16407 // acetyltransferase activity // inferred from electronic annotation /// 16740 // transferase activity // inferred from electronic annotation /// 46933 // hydrogen-transporting ATP synthase activity, rotational mechanism // inferred from electro…	6139 // nucleobase, nucleoside, nucleotide and nucleic acid metabolism // inferred from electronic annotation /// 6333 // chromatin assembly or disassembly // inferred from electronic annotation /// 6754 // ATP biosynthesis // inferred from electronic annotation /// 15986 // ATP synthesis coupled proton transport // inferred from electronic annotation	16469 // proton-transporting two-sector ATPase complex // inferred from electronic annotation	IPR000182 // GCN5-related N-acetyltransferase // 5.4E-9 /// IPR007197 // Radical SAM // 1.9E-16
12812	154011_at	0.624827	2.3685	6.36747	4.06227e-07	6.87435e-06	6.3067	FBgn0028664	CG11589	VhaM9.7-1	VhaM9.7-1	38503	8553 // hydrogen-exporting ATPase activity, phosphorylative mechanism // inferred from sequence or structural similarity /// 19204 // nucleotide phosphatase activity // inferred from electronic annotation /// 46933 // hydrogen-transporting ATP synthase activity, rotational mechanism // inferred from electronic annotation /// 46961 // hydrogen-transporting ATPase activity, rotational mechanism // …	6812 // cation transport // inferred from electronic annotation /// 15986 // ATP synthesis coupled proton transport // inferred from electronic annotation	220 // hydrogen-transporting ATPase V0 domain // inferred from sequence or structural similarity /// 16021 // integral to membrane // inferred from electronic annotation /// 16469 // proton-transporting two-sector ATPase complex // inferred from electronic annotation /// 220 // hydrogen-transporting ATPase V0 domain // inferred from sequence similarity	IPR008389 // ATP synthase subunit H // 1.2E-39
6720	147919_at	0.655459	1.20845	6.36515	4.08911e-07	6.91054e-06	6.30019	FBgn0029002	CG18321	miple2	miple2	44787	8083 // growth factor activity // inferred from electronic annotation	---	---	IPR000762 // PTN/MK heparin-binding protein // 7.1E-28
9577	150776_at	0.460865	0.215625	6.35803	4.17283e-07	7.03505e-06	6.28017	FBgn0039585	CG1894	CG1894	CG1894	43378	4402 // histone acetyltransferase activity // inferred from sequence or structural similarity /// 30528 // transcription regulator activity // inferred from electronic annotation /// 4402 // histone acetyltransferase activity // inferred from sequence similarity	6357 // regulation of transcription from RNA polymerase II promoter // inferred from electronic annotation /// 6473 // protein amino acid acetylation // inferred from electronic annotation	---	IPR002717 // MOZ/SAS-like protein // 1.3E-110
4361	145560_at	0.32172	1.25678	6.35545	4.20351e-07	7.07826e-06	6.27293	FBgn0031307	CG4726	CG4726	CG4726	33292	5316 // high affinity inorganic phosphate:sodium symporter activity // inferred from sequence or structural similarity /// 5215 // transporter activity // inferred from electronic annotation /// 5316 // high affinity inorganic phosphate:sodium symporter activity // inferred from sequence similarity	5975 // carbohydrate metabolism // inferred from electronic annotation /// 6796 // phosphate metabolism // inferred from electronic annotation /// 6812 // cation transport // inferred from electronic annotation /// 6817 // phosphate transport // inferred from electronic annotation /// 6858 // extracellular transport // inferred from electronic annotation /// 8643 // carbohydrate transport // infe…	16021 // integral to membrane // inferred from electronic annotation /// 16020 // membrane // inferred from electronic annotation	---
4696	145895_at	0.408656	-0.426887	6.34446	4.33699e-07	7.2594e-06	6.24203	FBgn0031807	CG13981	CG13981	CG13981	33891	---	---	---	---
1837	143036_at	0.498738	0.376973	6.34134	4.37574e-07	7.29811e-06	6.23324	FBgn0038746	CG4510	Surf6	Surfeit 6	42370	15232 // heme transporter activity // non-traceable author statement	7046 // ribosome biogenesis // inferred from sequence or structural similarity /// 8535 // cytochrome c oxidase complex assembly // non-traceable author statement /// 7046 // ribosome biogenesis // inferred from sequence similarity	5730 // nucleolus // inferred from sequence or structural similarity /// 5634 // nucleus // inferred from electronic annotation /// 5730 // nucleolus // non-traceable author statement /// 5730 // nucleolus // inferred from sequence similarity	IPR007019 // Surfeit locus protein 6 // 3.0E-105
1521	142720_at	0.424834	0.550784	6.34072	4.38343e-07	7.30225e-06	6.23151	FBgn0036187	CG11660	CG11660	CG11660	39309	4672 // protein kinase activity // non-traceable author statement /// 4713 // protein-tyrosine kinase activity // inferred from electronic annotation /// 5524 // ATP binding // inferred from electronic annotation /// 16301 // kinase activity // inferred from electronic annotation /// 16740 // transferase activity // inferred from electronic annotation	6468 // protein amino acid phosphorylation // inferred from electronic annotation	---	IPR000687 // Protein of unknown function RIO1 // 2.6E-121
10484	151683_at	0.684741	4.00123	6.3327	4.48458e-07	7.46187e-06	6.20896	FBgn0037245	CG14648	CG14648	CG14648	40559	3824 // catalytic activity // inferred from electronic annotation /// 166 // nucleotide binding // inferred from electronic annotation	8152 // metabolism // inferred from electronic annotation	---	IPR002698 // 5-formyltetrahydrofolate cyclo-ligase // 3.0E-60 /// IPR002698 // 5-formyltetrahydrofolate cyclo-ligase // 2.7E-5
98	141297_at	0.498594	0.107634	6.32872	4.53569e-07	7.52903e-06	6.19776	FBgn0033806	CG4616	CG4616	CG4616	36455	---	---	---	---
662	141861_at	0.512657	0.600995	6.32672	4.56165e-07	7.56316e-06	6.19212	---	---	---	---	---	---	---	---	---
325	141524_at	0.741154	1.96571	6.32457	4.58961e-07	7.59476e-06	6.18609	FBgn0035688	CG10289	CG10289	CG10289	38714	---	---	---	IPR007587 // SIT4 phosphatase-associated protein // 1.0E-126
11633	152832_at	0.347055	1.1182	6.31693	4.69055e-07	7.7264e-06	6.16459	FBgn0082585	CG30023	sprt	sprite	246397	5515 // protein binding // inferred from electronic annotation	7508 // larval heart development // inferred from mutant phenotype	16023 // cytoplasmic membrane-bound vesicle // inferred from direct assay /// 16328 // lateral plasma membrane // inferred from direct assay /// 31252 // leading edge // inferred from direct assay	---
13340	154539_at	0.829055	4.06224	6.31059	4.77592e-07	7.84415e-06	6.14677	FBgn0037671	CG8444	CG8444	CG8444	41104	4872 // receptor activity // inferred from electronic annotation	---	16021 // integral to membrane // inferred from electronic annotation	---
1640	142839_at	0.438744	0.150825	6.30292	4.88152e-07	7.9895e-06	6.12515	FBgn0026564	CG1162	CG1162	CG1162	40829	---	---	---	---
10242	151441_at	0.584229	0.245894	6.29017	5.06197e-07	8.23002e-06	6.08929	---	---	---	---	---	---	---	---	---
13760	154959_at	0.342061	1.41155	6.29005	5.06372e-07	8.23002e-06	6.08895	FBgn0039182	CG5728	CG5728	CG5728	42899	3729 // mRNA binding // inferred from sequence or structural similarity /// 3676 // nucleic acid binding // inferred from electronic annotation /// 3723 // RNA binding // inferred from electronic annotation /// 5488 // binding // inferred from electronic annotation /// 3729 // mRNA binding // inferred from sequence similarity	381 // regulation of alternative nuclear mRNA splicing, via spliceosome // inferred from mutant phenotype /// 6364 // rRNA processing // inferred from sequence or structural similarity /// 6364 // rRNA processing // inferred from sequence similarity	5634 // nucleus // Unknown /// 5730 // nucleolus // inferred from sequence or structural similarity /// 5634 // nucleus // inferred from curator /// 5730 // nucleolus // inferred from sequence similarity	IPR003029 // RNA binding S1 // 0.082 /// IPR003029 // RNA binding S1 // 5.3E-5
3524	144723_at	0.320305	-0.165763	6.2774	5.24956e-07	8.48285e-06	6.05333	FBgn0030077	CG15365	CG15365	CG15365	31829	---	---	---	IPR009638 // Fez1 // 1.6E-6 /// IPR009638 // Fez1 // 9.9E-10
10342	151541_s_at	0.297842	-0.146392	6.26687	5.40964e-07	8.72141e-06	6.02366	FBgn0051619	CG31619	CG31619	CG31619	35424	17074 // procollagen N-endopeptidase activity // inferred from sequence or structural similarity /// 8233 // peptidase activity // inferred from electronic annotation /// 17074 // procollagen N-endopeptidase activity // inferred from sequence similarity	6508 // proteolysis // inferred from sequence or structural similarity /// 6952 // defense response // inferred from electronic annotation /// 7165 // signal transduction // inferred from electronic annotation /// 16337 // cell-cell adhesion // inferred from electronic annotation /// 6508 // proteolysis // inferred from sequence similarity	---	IPR000884 // Thrombospondin, type I // 1.2E-9 /// IPR000884 // Thrombospondin, type I // 4.9E-7 /// IPR007110 // Immunoglobulin-like // 1.4E-6
10703	151902_at	0.488451	2.22762	6.26443	5.44727e-07	8.77199e-06	6.01681	FBgn0028371	CG30092	jbug	jitterbug	43997	3779 // actin binding // inferred from sequence or structural similarity /// 5200 // structural constituent of cytoskeleton // inferred from electronic annotation /// 3779 // actin binding // inferred from sequence similarity	7010 // cytoskeleton organization and biogenesis // inferred from electronic annotation	---	IPR001715 // Calponin-like actin-binding // 5.2E-23 /// IPR001715 // Calponin-like actin-binding // 4.8E-23 /// IPR001715 // Calponin-like actin-binding // 7.6E-17 /// IPR001298 // Filamin/ABP280 repeat // 1.3E-5 /// IPR001298 // Filamin/ABP280 repeat // 4.1E-7 /// IPR001298 // Filamin/ABP280 repeat // 7.9E-11 /// IPR001298 // Filamin/ABP280 repeat // 2.7E-8 /// IPR001298 // Filamin/ABP280 repeat…
12743	153942_at	0.50665	0.844972	6.26241	5.47875e-07	8.80245e-06	6.01111	FBgn0030710	CG8924	CG8924	CG8924	32557	3677 // DNA binding // non-traceable author statement /// 5515 // protein binding // inferred from electronic annotation /// 30528 // transcription regulator activity // inferred from electronic annotation /// 5515 // protein binding // inferred from physical interaction /// 42802 // identical protein binding // inferred from physical interaction /// 3677 // DNA binding // inferred from electroni…	6357 // regulation of transcription from RNA polymerase II promoter // inferred from electronic annotation /// 7530 // sex determination // inferred from electronic annotation /// 19226 // transmission of nerve impulse // inferred from electronic annotation /// 45449 // regulation of transcription // inferred from electronic annotation	5634 // nucleus // inferred from electronic annotation	IPR000210 // BTB/POZ domain // 3.6E-23
9395	150594_at	0.332055	-0.443074	6.25916	5.5299e-07	8.86429e-06	6.00193	FBgn0039344	CG4582	CG4582	CG4582	43086	4465 // lipoprotein lipase activity // inferred from sequence or structural similarity /// 4465 // lipoprotein lipase activity // inferred from sequence similarity	6629 // lipid metabolism // inferred from electronic annotation	---	IPR000734 // Lipase // 7.3E-38
8446	149645_at	0.637802	1.0119	6.25569	5.58482e-07	8.93189e-06	5.99217	FBgn0037835	CG14687	CG14687	CG14687	41297	---	---	---	IPR000048 // IQ calmodulin-binding region // 1.3E-7 /// IPR000048 // IQ calmodulin-binding region // 2.5E-7 /// IPR000048 // IQ calmodulin-binding region // 1.1E-7
2290	143489_at	0.488666	0.0800197	6.25246	5.63642e-07	8.98365e-06	5.98308	FBgn0004588	CG16931	Eig71Ea	Ecdysone-induced gene 71Ea	39700	---	---	---	IPR003475 // Insect protein of unknown function // 1.4E-50
10693	151892_at	0.584626	1.83219	6.24922	5.68874e-07	9.00557e-06	5.97396	FBgn0038641	CG7708	CG7708	CG7708	42245	5298 // proline:sodium symporter activity // inferred from sequence or structural similarity /// 15220 // choline transporter activity // inferred from sequence or structural similarity /// 5215 // transporter activity // inferred from electronic annotation /// 15293 // symporter activity // inferred from electronic annotation /// 31402 // sodium ion binding // inferred from electronic annotation…	6810 // transport // inferred from electronic annotation /// 8292 // acetylcholine biosynthesis // inferred from sequence or structural similarity /// 6811 // ion transport // inferred from electronic annotation /// 6814 // sodium ion transport // inferred from electronic annotation /// 7268 // synaptic transmission // inferred from electronic annotation /// 42136 // neurotransmitter biosynthesis…	16020 // membrane // inferred from electronic annotation /// 16021 // integral to membrane // inferred from sequence or structural similarity /// 16021 // integral to membrane // inferred from electronic annotation /// 16021 // integral to membrane // inferred from sequence similarity	IPR001734 // Na+/solute symporter // 9.5E-6 /// IPR001734 // Na+/solute symporter // 1.8E-9
8208	149407_at	0.328963	-0.340582	6.244	5.7742e-07	9.07929e-06	5.95923	---	---	---	---	---	---	---	---	---
4889	146088_at	0.383346	0.0563181	6.23926	5.85283e-07	9.19262e-06	5.94586	FBgn0032119	CG3769	CG3769	CG3769	34262	5515 // protein binding // inferred from physical interaction /// 5488 // binding // inferred from electronic annotation	---	---	---
5105	146304_at	0.48034	0.040398	6.23835	5.86798e-07	9.20609e-06	5.94331	FBgn0032462	CG16800	CG16800	CG16800	34693	---	---	---	---
12557	153756_at	0.353882	0.586989	6.23513	5.92217e-07	9.27253e-06	5.93423	FBgn0051156	CG31156	CG31156	CG31156	42669	3676 // nucleic acid binding // inferred from electronic annotation /// 3682 // chromatin binding // inferred from electronic annotation /// 3729 // mRNA binding // inferred from electronic annotation /// 16788 // hydrolase activity, acting on ester bonds // inferred from electronic annotation /// 5515 // protein binding // inferred from physical interaction /// 3723 // RNA binding // inferred fr…	6139 // nucleobase, nucleoside, nucleotide and nucleic acid metabolism // inferred from electronic annotation /// 6333 // chromatin assembly or disassembly // inferred from electronic annotation /// 6366 // transcription from RNA polymerase II promoter // inferred from electronic annotation /// 9299 // mRNA transcription // inferred from electronic annotation	---	IPR003029 // RNA binding S1 // 2.5E-14 /// IPR003029 // RNA binding S1 // 2.5E-14
11071	152270_at	0.517367	1.03743	6.23198	5.97563e-07	9.33317e-06	5.92535	FBgn0034745	CG4329	CG4329	CG4329	37582	---	---	---	IPR001680 // G-protein beta WD-40 repeat // 9.3E-6 /// IPR001680 // G-protein beta WD-40 repeat // 5.6E-9 /// IPR001680 // G-protein beta WD-40 repeat // 1.5
288	141487_at	0.476929	0.63493	6.22898	6.02692e-07	9.4019e-06	5.91691	FBgn0003278	CG4033	RpI135	RNA polymerase I 135kD subunit	33210	3676 // nucleic acid binding // inferred from electronic annotation /// 3677 // DNA binding // inferred from electronic annotation /// 3899 // DNA-directed RNA polymerase activity // inferred from sequence or structural similarity /// 3899 // DNA-directed RNA polymerase activity // inferred from electronic annotation /// 8270 // zinc ion binding // inferred from electronic annotation /// 16740 //…	6360 // transcription from RNA polymerase I promoter // inferred from sequence or structural similarity /// 6360 // transcription from RNA polymerase I promoter // non-traceable author statement /// 6350 // transcription // inferred from electronic annotation /// 6360 // transcription from RNA polymerase I promoter // inferred from sequence similarity	5634 // nucleus // non-traceable author statement /// 5736 // DNA-directed RNA polymerase I complex // inferred from sequence or structural similarity /// 5634 // nucleus // inferred from electronic annotation /// 5736 // DNA-directed RNA polymerase I complex // inferred from sequence similarity	IPR007641 // RNA polymerase Rpb2, domain 7 // 4.0E-30 /// IPR009674 // RNA polymerase I, Rpa2 specific // 6.5E-36 /// IPR007644 // RNA polymerase beta subunit // 1.1E-83 /// IPR007642 // RNA polymerase Rpb2, domain 2 // 1.0E-72 /// IPR007645 // RNA polymerase Rpb2, domain 3 // 2.5E-33 /// IPR007647 // RNA polymerase Rpb2, domain 5 // 5.5E-11 /// IPR007120 // RNA polymerase Rpb2, domain 6 // 1.0E-…
1147	142346_at	0.346947	-0.369171	6.2228	6.13426e-07	9.5384e-06	5.89947	FBgn0026190	CG9726	PH4MP	prolyl-4-hydroxylase-alpha MP	43624	4656 // procollagen-proline 4-dioxygenase activity // inferred from sequence or structural similarity /// 4656 // procollagen-proline 4-dioxygenase activity // non-traceable author statement /// 16706 // oxidoreductase activity, acting on paired donors, with incorporation or reduction of molecular oxygen, 2-oxoglutarate as one donor, and incorporation of one atom each of oxygen into both donors /…	18401 // peptidyl-proline hydroxylation to 4-hydroxy-L-proline // inferred from sequence or structural similarity /// 19538 // protein metabolism // inferred from electronic annotation /// 18401 // peptidyl-proline hydroxylation to 4-hydroxy-L-proline // inferred from sequence similarity	16222 // procollagen-proline, 2-oxoglutarate-4-dioxygenase complex // inferred from sequence or structural similarity /// 16222 // procollagen-proline, 2-oxoglutarate-4-dioxygenase complex // inferred from sequence similarity	IPR005123 // 2OG-Fe(II) oxygenase superfamily // 8.3E-20
9607	150806_at	0.39324	0.874267	6.21968	6.18904e-07	9.60226e-06	5.89069	FBgn0039639	CG14512	CG14512	CG14512	43443	---	---	---	IPR007235 // Glycosyltransferase 28, C-terminal // 1.9E-51
3262	144461_at	0.405454	0.0257952	6.21859	6.20826e-07	9.62144e-06	5.88762	FBgn0029690	CG6414	CG6414	CG6414	31352	4091 // carboxylesterase activity // inferred from sequence or structural similarity /// 3824 // catalytic activity // inferred from electronic annotation /// 4759 // serine esterase activity // inferred from electronic annotation /// 16787 // hydrolase activity // inferred from electronic annotation /// 4091 // carboxylesterase activity // inferred from sequence similarity	---	5783 // endoplasmic reticulum // inferred from electronic annotation	IPR002018 // Carboxylesterase, type B // 1.0E-126
2970	144169_at	0.723375	2.28572	6.21772	6.22382e-07	9.63489e-06	5.88515	FBgn0027052	CG5203	CHIP	CHIP	34433	4842 // ubiquitin-protein ligase activity // inferred from direct assay /// 5515 // protein binding // inferred from physical interaction /// 4842 // ubiquitin-protein ligase activity // inferred from electronic annotation /// 5488 // binding // inferred from electronic annotation /// 16874 // ligase activity // inferred from electronic annotation	6457 // protein folding // inferred from electronic annotation /// 16567 // protein ubiquitination // inferred from electronic annotation /// 19538 // protein metabolism // inferred from electronic annotation	151 // ubiquitin ligase complex // inferred from electronic annotation	IPR001440 // TPR repeat // 9.3E-7 /// IPR001440 // TPR repeat // 0.062 /// IPR001440 // TPR repeat // 9.6E-4 /// IPR003613 // Zn-finger, modified RING // 2.2E-55
11711	152910_at	0.417892	2.96528	6.21272	6.3132e-07	9.75171e-06	5.87106	FBgn0020493	CG5201	Dad	Daughters against dpp	42059	30617 // transforming growth factor beta receptor, inhibitory cytoplasmic mediator activity // inferred from genetic interaction /// 30617 // transforming growth factor beta receptor, inhibitory cytoplasmic mediator activity // traceable author statement	6357 // regulation of transcription from RNA polymerase II promoter // inferred from electronic annotation /// 7242 // intracellular signaling cascade // inferred from electronic annotation /// 17015 // regulation of transforming growth factor beta receptor signaling pathway // inferred from sequence or structural similarity /// 30512 // negative regulation of transforming growth factor beta rece…	5622 // intracellular // inferred from electronic annotation	IPR003619 // Dwarfin protein, domain A // 5.4E-38 /// IPR001132 // Dwarfin protein // 1.2E-98
1431	142630_at	0.347705	-0.266048	6.21017	6.35929e-07	9.81208e-06	5.86388	FBgn0052133	CG32133	CG32133	CG32133	39552	8134 // transcription factor binding // inferred from sequence or structural similarity /// 8134 // transcription factor binding // inferred from sequence similarity	---	5622 // intracellular // inferred from electronic annotation	IPR001357 // BRCT // 4.8E-4 /// IPR001357 // BRCT // 1.8E-11 /// IPR001357 // BRCT // 3.3E-9 /// IPR001357 // BRCT // 4.1E-11 /// IPR001357 // BRCT // 0.17 /// IPR001357 // BRCT // 9.2E-5
2775	143974_at	0.611586	5.94991	6.20254	6.49937e-07	9.99518e-06	5.84236	FBgn0023170	CG3997	RpL39	Ribosomal protein L39	37849	3676 // nucleic acid binding // inferred from electronic annotation /// 3735 // structural constituent of ribosome // inferred from sequence or structural similarity /// 3735 // structural constituent of ribosome // non-traceable author statement /// 3735 // structural constituent of ribosome // inferred from electronic annotation /// 3735 // structural constituent of ribosome // inferred from se…	6412 // protein biosynthesis // inferred from sequence or structural similarity /// 6412 // protein biosynthesis // inferred from electronic annotation /// 6412 // protein biosynthesis // inferred from sequence similarity	5840 // ribosome // non-traceable author statement /// 5842 // cytosolic large ribosomal subunit (sensu Eukaryota) // inferred from sequence or structural similarity /// 5622 // intracellular // inferred from electronic annotation /// 5840 // ribosome // inferred from electronic annotation /// 30529 // ribonucleoprotein complex // inferred from electronic annotation /// 5842 // cytosolic large ri…	IPR000077 // Ribosomal protein L39e // 7.7E-28
795	141994_at	0.46719	-0.107719	6.19987	6.54923e-07	1.00169e-05	5.83481	---	---	---	---	---	---	---	---	---
6622	147821_at	0.414508	0.570182	6.20084	6.53109e-07	1.00169e-05	5.83755	FBgn0029105	CG2987	alpha-catenin-related	alpha-catenin-related	49713	1584 // rhodopsin-like receptor activity // inferred from electronic annotation /// 3779 // actin binding // inferred from sequence or structural similarity /// 5200 // structural constituent of cytoskeleton // inferred from electronic annotation /// 45296 // cadherin binding // inferred from electronic annotation /// 5198 // structural molecule activity // inferred from electronic annotation ///…	6928 // cell motility // inferred from electronic annotation /// 7010 // cytoskeleton organization and biogenesis // inferred from electronic annotation /// 7155 // cell adhesion // inferred from electronic annotation /// 7186 // G-protein coupled receptor protein signaling pathway // inferred from electronic annotation	5915 // zonula adherens // inferred from sequence or structural similarity /// 15629 // actin cytoskeleton // inferred from electronic annotation /// 16021 // integral to membrane // inferred from electronic annotation /// 5915 // zonula adherens // inferred from sequence similarity	IPR006077 // Vinculin/alpha-catenin // 2.2E-11 /// IPR006077 // Vinculin/alpha-catenin // 2.2E-11
5223	146422_at	0.405866	0.178793	6.19937	6.55853e-07	1.00202e-05	5.83341	FBgn0051741	CG31741	CG31741	CG31741	35079	5044 // scavenger receptor activity // inferred from sequence or structural similarity /// 5044 // scavenger receptor activity // non-traceable author statement /// 5044 // scavenger receptor activity // inferred from sequence similarity	6915 // apoptosis // inferred from electronic annotation /// 6952 // defense response // non-traceable author statement /// 7155 // cell adhesion // inferred from electronic annotation	5887 // integral to plasma membrane // non-traceable author statement	IPR002159 // CD36 antigen // 2.7E-76
366	141565_at	0.418941	0.357534	6.197	6.60304e-07	1.00772e-05	5.82673	FBgn0003701	CG5785	thr	three rows	37042	5515 // protein binding // inferred from physical interaction	70 // mitotic sister chromatid segregation // non-traceable author statement /// 70 // mitotic sister chromatid segregation // traceable author statement /// 2009 // morphogenesis of an epithelium // inferred from mutant phenotype /// 7422 // peripheral nervous system development // inferred from mutant phenotype /// 7424 // tracheal system development (sensu Insecta) // inferred from mutant phen…	5737 // cytoplasm // inferred from direct assay	---
4751	145950_at	0.311055	0.108446	6.19046	6.72752e-07	1.02448e-05	5.80828	FBgn0031902	CG4969	Wnt6	Wnt6	34010	4871 // signal transducer activity // inferred from sequence or structural similarity /// 5102 // receptor binding // inferred from sequence or structural similarity /// 4871 // signal transducer activity // inferred from electronic annotation /// 4871 // signal transducer activity // inferred from sequence similarity /// 5102 // receptor binding // inferred from sequence similarity	7223 // frizzled-2 signaling pathway // inferred from sequence or structural similarity /// 7275 // development // inferred from electronic annotation /// 7223 // frizzled-2 signaling pathway // inferred from electronic annotation /// 16055 // Wnt receptor signaling pathway // inferred from electronic annotation /// 7223 // frizzled-2 signaling pathway // inferred from sequence similarity	5576 // extracellular region // inferred from electronic annotation	IPR005817 // Wnt superfamily // 1.0E-126 /// IPR005817 // Wnt superfamily // 2.2E-113
5164	146363_at	0.70535	0.745669	6.18993	6.73769e-07	1.02492e-05	5.80679	FBgn0032585	CG4580	CG4580	CG4580	34983	4245 // neprilysin activity // inferred from electronic annotation /// 8233 // peptidase activity // inferred from electronic annotation /// 8237 // metallopeptidase activity // inferred from electronic annotation	6508 // proteolysis // inferred from electronic annotation /// 19538 // protein metabolism // inferred from electronic annotation	16020 // membrane // inferred from electronic annotation	---
7415	148614_at	0.347657	-0.226832	6.18912	6.75344e-07	1.02509e-05	5.80448	FBgn0036219	CG14127	CG14127	CG14127	39345	---	---	---	---
11987	153186_at	0.511541	2.77313	6.18931	6.74961e-07	1.02509e-05	5.80504	FBgn0040259	CG18578	Ugt86Da	Ugt86Da	53510	15020 // glucuronosyltransferase activity // inferred from sequence or structural similarity /// 5515 // protein binding // inferred from physical interaction /// 16758 // transferase activity, transferring hexosyl groups // inferred from electronic annotation /// 15020 // glucuronosyltransferase activity // inferred from sequence similarity	5976 // polysaccharide metabolism // inferred from electronic annotation /// 6952 // defense response // inferred from electronic annotation /// 8202 // steroid metabolism // inferred from electronic annotation /// 9636 // response to toxin // inferred from electronic annotation /// 8152 // metabolism // inferred from electronic annotation	---	IPR002213 // UDP-glucoronosyl/UDP-glucosyl transferase // 6.7E-74
8081	149280_at	0.405987	0.480948	6.18815	6.77217e-07	1.02682e-05	5.80174	FBgn0037254	CG14651	CG14651	CG14651	40568	---	---	---	---
7349	148548_at	0.406515	2.92347	6.18219	6.88834e-07	1.0417e-05	5.78495	FBgn0010741	CG6302	l(3)01239	lethal (3) 01239	46121	51087 // chaperone binding // inferred from sequence or structural similarity /// 51087 // chaperone binding // inferred from sequence similarity	6458 // 'de novo' protein folding // inferred from sequence or structural similarity /// 9993 // oogenesis (sensu Insecta) // inferred from mutant phenotype /// 6458 // 'de novo' protein folding // inferred from sequence similarity	16272 // prefoldin complex // inferred from sequence or structural similarity /// 16272 // prefoldin complex // inferred from sequence similarity	IPR002777 // Prefoldin-related KE2 protein // 1.8E-20
7815	149014_at	0.394646	0.597645	6.1816	6.90003e-07	1.0417e-05	5.78327	FBgn0036818	CG14074	CG14074	CG14074	40051	5515 // protein binding // inferred from physical interaction	---	---	---
11620	152819_at	0.592141	1.31197	6.17797	6.97193e-07	1.05142e-05	5.77303	FBgn0038733	CG11407	CG11407	CG11407	42354	5324 // long-chain fatty acid transporter activity // inferred from sequence or structural similarity /// 16874 // ligase activity // inferred from electronic annotation /// 5515 // protein binding // inferred from physical interaction /// 3824 // catalytic activity // inferred from electronic annotation /// 5324 // long-chain fatty acid transporter activity // inferred from sequence similarity	8152 // metabolism // inferred from electronic annotation	---	IPR000873 // AMP-dependent synthetase and ligase // 9.1E-88
9285	150484_at	0.377131	0.432368	6.1703	7.12647e-07	1.07126e-05	5.75138	FBgn0039153	CG5463	CG5463	CG5463	42861	17068 // glutamyl-tRNA(Gln) amidotransferase activity // inferred from sequence or structural similarity /// 16874 // ligase activity // inferred from electronic annotation /// 16884 // carbon-nitrogen ligase activity, with glutamine as amido-N-donor // inferred from electronic annotation /// 17068 // glutamyl-tRNA(Gln) amidotransferase activity // inferred from electronic annotation /// 17068 //…	6425 // glutaminyl-tRNA aminoacylation // inferred from sequence or structural similarity /// 6520 // amino acid metabolism // inferred from electronic annotation /// 6412 // protein biosynthesis // inferred from electronic annotation /// 6425 // glutaminyl-tRNA aminoacylation // inferred from sequence similarity	5739 // mitochondrion // inferred from sequence or structural similarity /// 5739 // mitochondrion // inferred from sequence similarity	IPR006075 // GatB N-terminal region // 1.0E-126 /// IPR006107 // GatB central domain // 9.1E-22 /// IPR003789 // GatB/Yqey // 2.9E-18
9254	150453_at	0.340049	0.0896981	6.16093	7.3197e-07	1.09746e-05	5.72496	FBgn0039087	CG10168	CG10168	CG10168	42776	3851 // 2-hydroxyacylsphingosine 1-beta-galactosyltransferase activity // inferred from sequence or structural similarity /// 3851 // 2-hydroxyacylsphingosine 1-beta-galactosyltransferase activity // inferred from sequence similarity	5976 // polysaccharide metabolism // inferred from electronic annotation /// 6952 // defense response // inferred from electronic annotation /// 8202 // steroid metabolism // inferred from electronic annotation /// 9636 // response to toxin // inferred from electronic annotation	---	IPR002213 // UDP-glucoronosyl/UDP-glucosyl transferase // 1.3E-34
12892	154091_at	0.454337	3.66565	6.16072	7.32423e-07	1.09746e-05	5.72434	FBgn0031836	CG11050	CG11050	CG11050	33924	---	---	---	IPR006674 // Metal-dependent phosphohydrolase, HD subdomain // 1.2E-9
11528	152727_at	0.607443	2.67769	6.15839	7.37306e-07	1.10242e-05	5.71778	---	CG7224	---	---	---	---	---	---	---
9740	150939_at	0.36298	0.0512956	6.15695	7.40343e-07	1.1046e-05	5.71372	FBgn0039842	CG15566	CG15566	CG15566	43705	---	---	---	---
881	142080_at	0.392198	-0.553201	6.15314	7.48464e-07	1.11295e-05	5.70295	---	---	---	---	---	---	---	---	---
9034	150233_at	0.604569	3.81077	6.15339	7.47934e-07	1.11295e-05	5.70365	FBgn0038756	CG4783	CG4783	CG4783	42381	---	---	---	---
13939	155138_at	0.344042	1.44086	6.15283	7.49114e-07	1.11295e-05	5.70209	FBgn0037299	CG1115	CG1115	CG1115	40624	5515 // protein binding // inferred from physical interaction	---	---	IPR009851 // Modifier of rudimentary (Mod // 9.8E-87
1201	142400_at	0.423054	1.15401	6.15158	7.51796e-07	1.11357e-05	5.69856	FBgn0027376	CG11908	rha	rha	43071	---	---	5694 // chromosome // non-traceable author statement	---
10027	151226_r_at	0.673652	0.97243	6.15	7.55208e-07	1.11673e-05	5.69409	FBgn0005613	CG8404	Sox15	Sox box protein 15	36575	3700 // transcription factor activity // inferred from sequence or structural similarity /// 4812 // aminoacyl-tRNA ligase activity // inferred from electronic annotation /// 5524 // ATP binding // inferred from electronic annotation /// 3677 // DNA binding // inferred from electronic annotation /// 3700 // transcription factor activity // inferred from sequence similarity	6357 // regulation of transcription from RNA polymerase II promoter // inferred from electronic annotation /// 6418 // tRNA aminoacylation for protein translation // inferred from electronic annotation /// 7398 // ectoderm development // inferred from electronic annotation /// 7399 // nervous system development // inferred from electronic annotation /// 45449 // regulation of transcription // inf…	5634 // nucleus // inferred from sequence or structural similarity /// 5634 // nucleus // non-traceable author statement /// 5634 // nucleus // inferred from electronic annotation /// 5634 // nucleus // inferred from sequence similarity	IPR000910 // HMG1/2 (high mobility group) box // 1.1E-31
998	142197_at	0.376682	0.177182	6.14319	7.70062e-07	1.13239e-05	5.67485	FBgn0026432	CG5688	Grip163	Grip163	39365	43015 // gamma-tubulin binding // inferred from direct assay	226 // microtubule cytoskeleton organization and biogenesis // inferred from electronic annotation	5813 // centrosome // inferred from direct assay /// 8274 // gamma-tubulin ring complex // inferred from physical interaction /// 8274 // gamma-tubulin ring complex // inferred from sequence or structural similarity /// 8274 // gamma-tubulin ring complex // non-traceable author statement /// 922 // spindle pole // inferred from electronic annotation /// 5815 // microtubule organizing center // in…	IPR007259 // Spc97/Spc98 // 2.4E-7 /// IPR007259 // Spc97/Spc98 // 1.1E-10
2925	144124_at	0.339325	0.740514	6.14284	7.7083e-07	1.13239e-05	5.67387	FBgn0026374	CG8497	Rhp	Rhophilin	32531	5083 // small GTPase regulator activity // inferred from electronic annotation /// 17049 // GTP-Rho binding // inferred from sequence or structural similarity /// 17049 // GTP-Rho binding // non-traceable author statement /// 5515 // protein binding // inferred from electronic annotation /// 17049 // GTP-Rho binding // inferred from sequence similarity	7010 // cytoskeleton organization and biogenesis // inferred from electronic annotation /// 7165 // signal transduction // inferred from electronic annotation	5622 // intracellular // inferred from electronic annotation	IPR001478 // PDZ/DHR/GLGF domain // 9.2E-8 /// IPR000861 // PKN/rhophilin/rhotekin rho-binding repeat // 2.1E-11 /// IPR004328 // BRO1 // 9.9E-77 /// IPR001478 // PDZ/DHR/GLGF domain // 9.1E-8
10871	152070_at	0.408364	4.59833	6.1373	7.83123e-07	1.14311e-05	5.65824	FBgn0030521	CG10992	CG10992	CG10992	32341	4213 // cathepsin B activity // inferred from sequence or structural similarity /// 5515 // protein binding // inferred from physical interaction /// 4197 // cysteine-type endopeptidase activity // inferred from electronic annotation /// 8233 // peptidase activity // inferred from electronic annotation /// 8234 // cysteine-type peptidase activity // inferred from electronic annotation /// 16787 /…	6508 // proteolysis // inferred from electronic annotation /// 35071 // salivary gland cell autophagic cell death // inferred from expression pattern /// 48102 // autophagic cell death // inferred from expression pattern	---	IPR000668 // Peptidase C1A, papain // 8.3E-114
5681	146880_at	0.303419	-0.0205174	6.13257	7.93797e-07	1.15484e-05	5.64487	FBgn0041087	CG8805	wun2	wunen-2	53558	8195 // phosphatidate phosphatase activity // inferred from sequence or structural similarity /// 8195 // phosphatidate phosphatase activity // non-traceable author statement /// 8195 // phosphatidate phosphatase activity // inferred from sequence similarity	6629 // lipid metabolism // inferred from electronic annotation /// 7186 // G-protein coupled receptor protein signaling pathway // inferred from electronic annotation /// 7277 // pole cell development // inferred from mutant phenotype /// 7280 // pole cell migration // inferred from mutant phenotype /// 8354 // germ cell migration // inferred from genetic interaction /// 8354 // germ cell migrat…	5886 // plasma membrane // inferred from direct assay /// 5886 // plasma membrane // inferred from sequence or structural similarity /// 16021 // integral to membrane // inferred from sequence or structural similarity /// 5886 // plasma membrane // inferred from sequence similarity /// 16021 // integral to membrane // inferred from sequence similarity	IPR000326 // PA-phosphatase related phosphoesterase // 3.5E-45
8341	149540_at	0.271073	0.13928	6.13115	7.97034e-07	1.15834e-05	5.64086	FBgn0037665	CG16733	CG16733	CG16733	41098	4062 // aryl sulfotransferase activity // inferred from sequence or structural similarity /// 17051 // retinol dehydratase activity // inferred from sequence or structural similarity /// 4062 // aryl sulfotransferase activity // inferred from sequence similarity /// 17051 // retinol dehydratase activity // inferred from sequence similarity	---	---	IPR000863 // Sulfotransferase // 3.1E-100
7751	148950_at	0.430892	2.27309	6.12725	8.05965e-07	1.16915e-05	5.62985	FBgn0042641	CG3874	frc	fringe connection	39943	5457 // GDP-fucose transporter activity // inferred from direct assay /// 5458 // GDP-mannose transporter activity // inferred from direct assay /// 5459 // UDP-galactose transporter activity // inferred from direct assay /// 5460 // UDP-glucose transporter activity // inferred from direct assay /// 5461 // UDP-glucuronic acid transporter activity // inferred from direct assay /// 5462 // UDP-N-a…	1745 // compound eye morphogenesis (sensu Endopterygota) // inferred from mutant phenotype /// 5975 // carbohydrate metabolism // inferred from electronic annotation /// 7220 // Notch receptor processing // non-traceable author statement /// 7423 // sensory organ development // inferred from mutant phenotype /// 7447 // imaginal disc pattern formation // inferred from mutant phenotype /// 7476 //…	5794 // Golgi apparatus // non-traceable author statement /// 5795 // Golgi stack // inferred from electronic annotation /// 16020 // membrane // inferred from electronic annotation /// 16021 // integral to membrane // inferred from electronic annotation	---
5677	146876_at	0.412627	-0.161784	6.12358	8.14474e-07	1.1788e-05	5.61948	FBgn0033404	CG1978	Or45a	Odorant receptor 45a	35958	4984 // olfactory receptor activity // inferred from sequence or structural similarity /// 5549 // odorant binding // inferred from electronic annotation /// 4984 // olfactory receptor activity // inferred from sequence similarity	7608 // sensory perception of smell // inferred from sequence or structural similarity /// 7608 // sensory perception of smell // inferred from sequence similarity	16021 // integral to membrane // inferred from sequence or structural similarity /// 16021 // integral to membrane // inferred from sequence similarity	IPR004117 // Olfactory receptor, Drosophila // 2.2E-85
6931	148130_at	0.479956	0.603355	6.12264	8.16659e-07	1.18074e-05	5.61684	FBgn0041147	CG10850	ida	imaginal discs arrested	45574	16874 // ligase activity // inferred from electronic annotation /// 5488 // binding // inferred from electronic annotation	74 // regulation of progression through cell cycle // inferred from electronic annotation /// 74 // regulation of progression through cell cycle // traceable author statement /// 90 // mitotic anaphase // non-traceable author statement /// 278 // mitotic cell cycle // inferred from mutant phenotype /// 7444 // imaginal disc development // inferred from mutant phenotype /// 30162 // regulation of …	5680 // anaphase-promoting complex // non-traceable author statement /// 5680 // anaphase-promoting complex // traceable author statement	---
5413	146612_at	0.407212	0.0817791	6.11767	8.28355e-07	1.19273e-05	5.60279	FBgn0032978	CG15216	CG15216	CG15216	35444	3676 // nucleic acid binding // inferred from electronic annotation /// 8270 // zinc ion binding // inferred from electronic annotation	---	5634 // nucleus // inferred from electronic annotation	IPR002893 // Zn-finger, MYND type // 6.2E-6
514	141713_at	0.446515	0.646129	6.11498	8.34763e-07	1.19949e-05	5.59518	FBgn0004643	CG9900	mit(1)15	mitotic 15	---	5515 // protein binding // inferred from physical interaction	70 // mitotic sister chromatid segregation // inferred from mutant phenotype /// 7049 // cell cycle // inferred from mutant phenotype /// 7067 // mitosis // inferred from electronic annotation /// 7049 // cell cycle // inferred from electronic annotation /// 7126 // meiosis // inferred from electronic annotation /// 51301 // cell division // inferred from electronic annotation /// 7094 // mitotic…	776 // kinetochore // inferred from direct assay /// 5828 // kinetochore microtubule // inferred from direct assay /// 775 // chromosome, pericentric region // inferred from electronic annotation /// 5634 // nucleus // inferred from electronic annotation /// 776 // kinetochore // non-traceable author statement /// 940 // outer kinetochore of condensed chromosome // non-traceable author statement	IPR009361 // Centromerekinetochore Zw10 // 1.0E-126
4874	146073_at	0.582485	1.2139	6.11109	8.44092e-07	1.20923e-05	5.58421	FBgn0032101	CG9586	CG9586	CG9586	34241	---	---	---	---
11925	153124_at	0.357233	0.0112138	6.10837	8.50701e-07	1.21491e-05	5.57651	FBgn0034734	CG4554	CG4554	CG4554	37570	5488 // binding // inferred from electronic annotation	---	---	---
7287	148486_at	0.880916	4.47322	6.10462	8.59861e-07	1.22675e-05	5.56593	FBgn0045823	CG16707	vsg	visgun	39137	---	7611 // learning and/or memory // inferred from mutant phenotype /// 8355 // olfactory learning // inferred from mutant phenotype	---	IPR007947 // CD164 related protein // 1.4E-10 /// IPR007947 // CD164 related protein // 1.4E-10
6154	147353_at	0.639401	3.19826	6.09854	8.74956e-07	1.24645e-05	5.54875	FBgn0034198	CG11400	CG11400	CG11400	36935	---	---	---	---
10464	151663_at	0.764509	2.76875	6.09626	8.80702e-07	1.25265e-05	5.54229	FBgn0052649	CG32649	CG32649	CG32649	32239	4672 // protein kinase activity // non-traceable author statement	6122 // mitochondrial electron transport, ubiquinol to cytochrome c // inferred from sequence or structural similarity /// 6732 // coenzyme metabolism // inferred from electronic annotation /// 51189 // prosthetic group metabolism // inferred from electronic annotation /// 6122 // mitochondrial electron transport, ubiquinol to cytochrome c // inferred from sequence similarity	5739 // mitochondrion // inferred from sequence or structural similarity /// 5739 // mitochondrion // inferred from sequence similarity	IPR004147 // ABC1 protein // 1.1E-55
10625	151824_at	0.476666	-0.55815	6.09209	8.91263e-07	1.26511e-05	5.53052	FBgn0027616	CG12076	YT521-B	YT521-B	38420	---	---	---	IPR007275 // YT521-B-like protein // 5.5E-52 /// IPR007275 // YT521-B-like protein // 5.5E-52
11516	152715_at	0.617057	3.6711	6.08993	8.96795e-07	1.27167e-05	5.52441	FBgn0033188	CG1600	CG1600	CG1600	35687	4024 // alcohol dehydrogenase activity, zinc-dependent // inferred from electronic annotation /// 8270 // zinc ion binding // inferred from electronic annotation /// 16491 // oxidoreductase activity // inferred from electronic annotation	---	---	IPR002085 // Zinc-containing alcohol dehydrogenase superfamily // 5.0E-25 /// IPR002085 // Zinc-containing alcohol dehydrogenase superfamily // 5.0E-25
4465	145664_at	0.918523	3.48481	6.08043	9.2153e-07	1.30016e-05	5.49754	FBgn0031453	CG9894	CG9894	CG9894	33462	---	---	5634 // nucleus // inferred from direct assay	---
5649	146848_at	0.44041	0.0332999	6.07993	9.22837e-07	1.3007e-05	5.49614	FBgn0033353	CG13749	CG13749	CG13749	35894	---	---	---	---
4342	145541_at	0.462126	0.356324	6.07755	9.29156e-07	1.30829e-05	5.48941	FBgn0031270	CG13689	CG13689	CG13689	33241	5515 // protein binding // inferred from physical interaction	---	---	---
2513	143712_at	0.498751	1.20736	6.07223	9.43408e-07	1.32529e-05	5.47438	FBgn0013469	CG12296	klu	klumpfuss	39228	3676 // nucleic acid binding // inferred from sequence or structural similarity /// 8270 // zinc ion binding // inferred from electronic annotation /// 30528 // transcription regulator activity // inferred from electronic annotation /// 3676 // nucleic acid binding // inferred from electronic annotation /// 46872 // metal ion binding // inferred from electronic annotation /// 3676 // nucleic acid…	6357 // regulation of transcription from RNA polymerase II promoter // inferred from electronic annotation /// 8283 // cell proliferation // inferred from electronic annotation /// 46580 // negative regulation of Ras protein signal transduction // non-traceable author statement /// 46672 // positive regulation of retinal cell programmed cell death (sensu Endopterygota) // inferred from mutant phe…	5634 // nucleus // inferred from sequence or structural similarity /// 5634 // nucleus // inferred from electronic annotation /// 5634 // nucleus // inferred from sequence similarity	IPR007087 // Zn-finger, C2H2 type // 3.1E-5 /// IPR007087 // Zn-finger, C2H2 type // 1.3E-6 /// IPR007087 // Zn-finger, C2H2 type // 3.1E-7 /// IPR007087 // Zn-finger, C2H2 type // 8.8E-5
4327	145526_at	0.479246	1.05221	6.07199	9.44066e-07	1.32529e-05	5.47369	FBgn0031251	CG4213	CG4213	CG4213	33209	---	---	---	---
452	141651_at	0.359527	1.07056	6.0703	9.4865e-07	1.32906e-05	5.46891	FBgn0034641	CG10080	CG10080	CG10080	37462	5488 // binding // inferred from electronic annotation	---	---	---
12859	154058_at	0.696671	2.51867	6.07058	9.47892e-07	1.32906e-05	5.4697	FBgn0036449	CG5295	CG5295	CG5295	39611	5515 // protein binding // inferred from physical interaction	6629 // lipid metabolism // inferred from electronic annotation	---	IPR002641 // Patatin // 4.6E-38
4012	145211_at	0.322552	0.0360183	6.06577	9.61032e-07	1.34372e-05	5.4561	FBgn0030788	CG4756	CG4756	CG4756	32664	3682 // chromatin binding // inferred from electronic annotation /// 3714 // transcription corepressor activity // inferred from sequence or structural similarity /// 5515 // protein binding // inferred from physical interaction /// 3714 // transcription corepressor activity // inferred from sequence similarity	6357 // regulation of transcription from RNA polymerase II promoter // inferred from electronic annotation	---	---
758	141957_at	0.437195	0.732978	6.06464	9.64143e-07	1.34538e-05	5.45291	---	---	---	---	---	---	---	---	---
13547	154746_at	0.415476	0.933132	6.06021	9.76465e-07	1.36122e-05	5.44038	FBgn0034933	CG3735	CG3735	CG3735	37803	---	---	---	IPR010678 // Protein of unknown function DUF1253 // 1.0E-126
12354	153553_at	0.340589	0.730783	6.04892	1.00854e-06	1.40147e-05	5.40847	FBgn0029525	CG18273	CG18273	CG18273	30991	---	---	---	---
1586	142785_at	0.459733	1.96111	6.04757	1.01244e-06	1.40439e-05	5.40466	FBgn0037529	CG2957	mRpS9	mitochondrial ribosomal protein S9	40932	3676 // nucleic acid binding // inferred from electronic annotation /// 3735 // structural constituent of ribosome // inferred from sequence or structural similarity /// 3735 // structural constituent of ribosome // inferred from electronic annotation /// 3735 // structural constituent of ribosome // inferred from sequence similarity	6412 // protein biosynthesis // inferred from sequence or structural similarity /// 6412 // protein biosynthesis // inferred from electronic annotation /// 6412 // protein biosynthesis // inferred from sequence similarity	5763 // mitochondrial small ribosomal subunit // inferred from sequence or structural similarity /// 5622 // intracellular // inferred from electronic annotation /// 5840 // ribosome // inferred from electronic annotation /// 5763 // mitochondrial small ribosomal subunit // inferred from sequence similarity	IPR000754 // Ribosomal protein S9 // 6.7E-40
12497	153696_at	0.331663	0.379328	6.04538	1.01882e-06	1.41184e-05	5.39846	FBgn0052418	CG32418	CG32418	CG32418	326214	5515 // protein binding // inferred from physical interaction	---	---	---
11208	152407_at	0.775083	3.89983	6.03099	1.06172e-06	1.46549e-05	5.35774	FBgn0033246	CG11198	CG11198	CG11198	35761	3989 // acetyl-CoA carboxylase activity // inferred from sequence or structural similarity /// 4075 // biotin carboxylase activity // inferred from electronic annotation /// 5524 // ATP binding // inferred from electronic annotation /// 9374 // biotin binding // inferred from electronic annotation /// 3824 // catalytic activity // inferred from electronic annotation /// 16874 // ligase activity /…	6633 // fatty acid biosynthesis // inferred from electronic annotation /// 8152 // metabolism // inferred from electronic annotation	9343 // biotin carboxylase complex // inferred from electronic annotation	IPR005482 // Biotin carboxylase, C-terminal // 4.5E-53 /// IPR005481 // Carbamoyl-phosphate synthetase large chain, N-terminal // 1.7E-57 /// IPR005479 // Carbamoyl-phosphate synthase L chain, ATP-binding // 2.8E-122 /// IPR000022 // Carboxyl transferase // 1.0E-126 /// IPR000089 // Biotin/lipoyl attachment // 7.1E-19 /// IPR005482 // Biotin carboxylase, C-terminal // 4.5E-53 /// IPR005481 // Car…
12131	153330_at	0.687244	0.998027	6.02888	1.06817e-06	1.47001e-05	5.35176	FBgn0038964	CG13849	Nop56	Nop56	42633	3729 // mRNA binding // inferred from electronic annotation	16072 // rRNA metabolism // inferred from electronic annotation	5730 // nucleolus // inferred from sequence or structural similarity /// 5730 // nucleolus // non-traceable author statement /// 30532 // small nuclear ribonucleoprotein complex // inferred from sequence or structural similarity /// 5730 // nucleolus // inferred from sequence similarity /// 30532 // small nuclear ribonucleoprotein complex // inferred from sequence similarity	IPR002687 // Pre-mRNA processing ribonucleoprotein, binding region // 5.0E-88
6441	147640_at	0.388077	0.0642144	6.02531	1.07914e-06	1.47581e-05	5.34168	FBgn0034668	CG4054	Fili	Fish-lips	37494	---	7155 // cell adhesion // inferred from electronic annotation /// 19226 // transmission of nerve impulse // inferred from electronic annotation	---	IPR001611 // Leucine-rich repeat // 0.29 /// IPR001611 // Leucine-rich repeat // 5.5E-4 /// IPR001611 // Leucine-rich repeat // 0.0097 /// IPR001611 // Leucine-rich repeat // 1.1E-4 /// IPR001611 // Leucine-rich repeat // 0.017 /// IPR001611 // Leucine-rich repeat // 0.33 /// IPR001611 // Leucine-rich repeat // 0.0014
10737	151936_at	0.376588	3.52271	6.02512	1.07973e-06	1.47581e-05	5.34114	FBgn0030726	CG9216	CG9216	CG9216	32576	---	---	---	---
12741	153940_at	0.387426	1.84888	6.02441	1.08194e-06	1.47725e-05	5.33912	FBgn0030499	CG11178	CG11178	CG11178	32315	---	---	---	---
7019	148218_at	0.515403	1.19955	6.02323	1.0856e-06	1.4795e-05	5.33578	FBgn0035603	CG10635	CG10635	CG10635	38615	51087 // chaperone binding // inferred from sequence or structural similarity /// 51082 // unfolded protein binding // inferred from electronic annotation /// 51087 // chaperone binding // inferred from sequence similarity	6458 // 'de novo' protein folding // inferred from sequence or structural similarity /// 6457 // protein folding // inferred from electronic annotation /// 6458 // 'de novo' protein folding // inferred from sequence similarity	16272 // prefoldin complex // inferred from sequence or structural similarity /// 16272 // prefoldin complex // inferred from sequence similarity	IPR002777 // Prefoldin-related KE2 protein // 8.1E-29
11615	152814_at	0.681789	3.99265	6.02119	1.09196e-06	1.48528e-05	5.33002	FBgn0014020	CG8416	Rho1	Rho1	36775	3924 // GTPase activity // inferred from sequence or structural similarity /// 3924 // GTPase activity // non-traceable author statement /// 3924 // GTPase activity // traceable author statement /// 5515 // protein binding // inferred from physical interaction /// 5525 // GTP binding // inferred from electronic annotation /// 166 // nucleotide binding // inferred from electronic annotation /// 39…	910 // cytokinesis // inferred from mutant phenotype /// 1736 // establishment of planar polarity // non-traceable author statement /// 1736 // establishment of planar polarity // traceable author statement /// 1737 // establishment of wing hair orientation // traceable author statement /// 6897 // endocytosis // inferred from mutant phenotype /// 7010 // cytoskeleton organization and biogenesis …	5622 // intracellular // inferred from electronic annotation /// 16020 // membrane // inferred from electronic annotation	IPR001806 // Ras GTPase superfamily // 2.3E-97
9025	150224_at	0.417785	0.659564	6.02074	1.09338e-06	1.48576e-05	5.32874	FBgn0038741	CG17186	CG17186	CG17186	42363	3676 // nucleic acid binding // inferred from electronic annotation /// 8270 // zinc ion binding // inferred from electronic annotation /// 5515 // protein binding // inferred from physical interaction	---	5634 // nucleus // inferred from electronic annotation	---
11144	152343_at	0.330371	1.12949	6.01767	1.10304e-06	1.4931e-05	5.32006	FBgn0025626	CG4281	CG4281	CG4281	31171	---	---	---	---
5380	146579_at	0.468489	0.649418	6.01252	1.11944e-06	1.51091e-05	5.30549	FBgn0032934	CG8679	CG8679	CG8679	35395	---	---	5635 // nuclear envelope // inferred from electronic annotation	IPR003887 // Lamino-associated polypeptide 2/emerin // 2.7E-20 /// IPR002110 // Ankyrin // 27.0 /// IPR002110 // Ankyrin // 1.2E-7 /// IPR002110 // Ankyrin // 2.3
1681	142880_at	0.358024	0.656558	6.00846	1.13254e-06	1.5242e-05	5.294	FBgn0030301	CG1745	CG1745	CG1745	32090	---	---	---	---
10198	151397_at	0.352641	0.0204582	6.00662	1.13854e-06	1.5308e-05	5.28879	FBgn0040928	CG15345	CG15345	CG15345	50402	---	---	---	---
13403	154602_at	0.464911	1.89614	6.0052	1.14317e-06	1.53408e-05	5.28478	FBgn0010389	CG7223	htl	heartless	42160	4713 // protein-tyrosine kinase activity // inferred from sequence or structural similarity /// 4713 // protein-tyrosine kinase activity // non-traceable author statement /// 5007 // fibroblast growth factor receptor activity // inferred from sequence or structural similarity /// 5007 // fibroblast growth factor receptor activity // non-traceable author statement /// 5007 // fibroblast growth fac…	1710 // mesodermal cell fate commitment // inferred from genetic interaction /// 1710 // mesodermal cell fate commitment // inferred from mutant phenotype /// 6468 // protein amino acid phosphorylation // inferred from sequence or structural similarity /// 6468 // protein amino acid phosphorylation // non-traceable author statement /// 7280 // pole cell migration // traceable author statement ///…	5886 // plasma membrane // inferred from sequence or structural similarity /// 16021 // integral to membrane // inferred from sequence or structural similarity /// 16021 // integral to membrane // non-traceable author statement /// 16020 // membrane // inferred from electronic annotation /// 16021 // integral to membrane // inferred from electronic annotation /// 5886 // plasma membrane // inferr…	IPR000719 // Protein kinase // 9.7E-87 /// IPR007110 // Immunoglobulin-like // 8.6E-10
11761	152960_i_at	0.70252	4.3733	6.00423	1.14637e-06	1.5369e-05	5.28203	FBgn0037888	CG17210	scpr-B	SCP-containing protein B	41357	5515 // protein binding // inferred from physical interaction	---	5576 // extracellular region // inferred from electronic annotation	IPR001283 // Allergen V5/Tpx-1 related // 1.3E-27
6432	147631_at	0.344113	-0.0665792	5.99306	1.1837e-06	1.57789e-05	5.2504	FBgn0034647	CG15678	CG15678	CG15678	37468	---	---	---	---
12684	153883_at	0.842609	3.03976	5.99072	1.19165e-06	1.58548e-05	5.24379	FBgn0016685	CG7917	Nlp	Nucleoplasmin	43560	3676 // nucleic acid binding // inferred from electronic annotation /// 42393 // histone binding // non-traceable author statement /// 42393 // histone binding // traceable author statement /// 42623 // ATPase activity, coupled // non-traceable author statement /// 5515 // protein binding // inferred from physical interaction	16584 // nucleosome spacing // non-traceable author statement	5634 // nucleus // inferred from direct assay /// 5634 // nucleus // non-traceable author statement /// 5730 // nucleolus // inferred from direct assay /// 5634 // nucleus // inferred from electronic annotation	IPR004301 // Nucleoplasmin // 1.4E-80
1430	142629_at	0.380256	0.430557	5.98902	1.19748e-06	1.59172e-05	5.23897	FBgn0034300	CG5098	CG5098	CG5098	37063	---	---	---	---
2867	144066_at	0.381601	-0.0275706	5.9863	1.20684e-06	1.60264e-05	5.23129	FBgn0025519	CG7773	fidipidine	fidipidine	36808	---	---	---	---
12034	153233_at	0.800074	4.2987	5.98445	1.21329e-06	1.60966e-05	5.22603	FBgn0033875	CG6357	CG6357	CG6357	36532	4217 // cathepsin L activity // inferred from sequence or structural similarity /// 4217 // cathepsin L activity // inferred from sequence similarity	---	---	---
2670	143869_at	0.660137	3.6546	5.97732	1.23834e-06	1.63363e-05	5.20586	FBgn0016076	CG14029	vri	vrille	33759	3677 // DNA binding // inferred from electronic annotation /// 3702 // RNA polymerase II transcription factor activity // non-traceable author statement /// 30528 // transcription regulator activity // traceable author statement /// 42803 // protein homodimerization activity // inferred from sequence or structural similarity /// 46982 // protein heterodimerization activity // inferred from sequen…	6351 // transcription, DNA-dependent // non-traceable author statement /// 6355 // regulation of transcription, DNA-dependent // inferred from electronic annotation /// 7275 // development // traceable author statement /// 7622 // rhythmic behavior // traceable author statement /// 7623 // circadian rhythm // inferred from direct assay /// 7623 // circadian rhythm // non-traceable author statemen…	5634 // nucleus // non-traceable author statement /// 5634 // nucleus // inferred from electronic annotation	---
2315	143514_s_at	0.509276	-0.423766	5.97592	1.24334e-06	1.63407e-05	5.20188	FBgn0004783 /// FBgn0004782	CG1252 /// CG2360	Ccp84Aa /// Ccp84Ab	Ccp84Aa /// Ccp84Ab	40824 /// 40825	8010 // structural constituent of larval cuticle (sensu Insecta) // inferred from sequence or structural similarity /// 42302 // structural constituent of cuticle // inferred from electronic annotation /// 8010 // structural constituent of larval cuticle (sensu Insecta) // inferred from sequence similarity	---	---	IPR000618 // Insect cuticle protein // 3.3E-31 /// IPR000618 // Insect cuticle protein // 5.5E-31
2564	143763_at	0.385041	0.351861	5.97616	1.24247e-06	1.63407e-05	5.20257	FBgn0014849	CG7327	Eig71Ei	Eig71Ei	39710	---	---	---	IPR003475 // Insect protein of unknown function // 2.2E-52
5540	146739_at	0.335228	0.531877	5.97642	1.24156e-06	1.63407e-05	5.2033	FBgn0033169	CG11123	CG11123	CG11123	35664	3729 // mRNA binding // inferred from electronic annotation /// 3723 // RNA binding // inferred from electronic annotation /// 5488 // binding // inferred from electronic annotation	16071 // mRNA metabolism // inferred from electronic annotation	---	IPR001313 // Pumilio/Puf RNA-binding // 1.8E-5
4335	145534_at	0.809792	1.69123	5.97514	1.24613e-06	1.6362e-05	5.19967	FBgn0043364	CG4427	cbt	cabut	33224	3676 // nucleic acid binding // inferred from electronic annotation /// 8270 // zinc ion binding // inferred from electronic annotation /// 16563 // transcriptional activator activity // inferred from sequence or structural similarity /// 46872 // metal ion binding // inferred from electronic annotation /// 16563 // transcriptional activator activity // inferred from sequence similarity	1736 // establishment of planar polarity // non-traceable author statement /// 6357 // regulation of transcription from RNA polymerase II promoter // inferred from electronic annotation /// 7254 // JNK cascade // non-traceable author statement /// 7390 // germ-band shortening // non-traceable author statement /// 7391 // dorsal closure // non-traceable author statement /// 7423 // sensory organ d…	5634 // nucleus // inferred from electronic annotation	IPR007087 // Zn-finger, C2H2 type // 1.7E-6 /// IPR007087 // Zn-finger, C2H2 type // 1.9E-7 /// IPR007087 // Zn-finger, C2H2 type // 3.2E-5 /// IPR007087 // Zn-finger, C2H2 type // 1.7E-6 /// IPR007087 // Zn-finger, C2H2 type // 1.9E-7 /// IPR007087 // Zn-finger, C2H2 type // 3.2E-5
13109	154308_at	0.371107	0.877844	5.97004	1.2645e-06	1.65567e-05	5.18523	FBgn0038057	CG12267	CG12267	CG12267	41542	3677 // DNA binding // inferred from electronic annotation /// 3899 // DNA-directed RNA polymerase activity // inferred from sequence or structural similarity /// 3899 // DNA-directed RNA polymerase activity // inferred from electronic annotation /// 3899 // DNA-directed RNA polymerase activity // inferred from sequence similarity	6383 // transcription from RNA polymerase III promoter // inferred from sequence or structural similarity /// 6350 // transcription // inferred from electronic annotation /// 6383 // transcription from RNA polymerase III promoter // inferred from sequence similarity	5666 // DNA-directed RNA polymerase III complex // inferred from sequence or structural similarity /// 5666 // DNA-directed RNA polymerase III complex // inferred from sequence similarity	IPR008806 // RNA polymerase III subunit RPC82 // 1.0E-126
13960	155159_at	0.486521	1.69763	5.96959	1.2661e-06	1.65622e-05	5.18398	FBgn0053094	CG33094	Synd	Syndapin	42467	5200 // structural constituent of cytoskeleton // inferred from electronic annotation /// 5515 // protein binding // inferred from physical interaction	6468 // protein amino acid phosphorylation // inferred from electronic annotation /// 6886 // intracellular protein transport // inferred from electronic annotation /// 6898 // receptor mediated endocytosis // inferred from electronic annotation /// 7242 // intracellular signaling cascade // inferred from electronic annotation /// 7269 // neurotransmitter secretion // non-traceable author stateme…	---	IPR001452 // SH3 // 7.9E-21 /// IPR001060 // Cdc15/Fes/CIP4 // 1.6E-31
11220	152419_at	0.381443	1.4668	5.96633	1.27803e-06	1.66604e-05	5.17472	FBgn0028481	CG4341	CG4341	CG4341	33276	5488 // binding // inferred from electronic annotation	---	---	IPR001440 // TPR repeat // 4.9E-8 /// IPR001440 // TPR repeat // 5.9E-8 /// IPR001440 // TPR repeat // 0.013 /// IPR001440 // TPR repeat // 4.9E-5 /// IPR001440 // TPR repeat // 5.1E-5 /// IPR001440 // TPR repeat // 5.2E-7
5859	147058_at	0.442615	1.35821	5.96238	1.2926e-06	1.68146e-05	5.16354	FBgn0033687	CG8407	CG8407	CG8407	36303	3777 // microtubule motor activity // inferred from electronic annotation /// 5200 // structural constituent of cytoskeleton // inferred from electronic annotation /// 42623 // ATPase activity, coupled // inferred from sequence or structural similarity /// 42623 // ATPase activity, coupled // inferred from sequence similarity	7018 // microtubule-based movement // inferred from sequence or structural similarity /// 7018 // microtubule-based movement // inferred from sequence similarity	30286 // dynein complex // inferred from sequence or structural similarity /// 30286 // dynein complex // inferred from sequence similarity	IPR001372 // Dynein light chain, type 1 // 1.2E-14
385	141584_at	0.629253	2.20391	5.95283	1.32851e-06	1.72019e-05	5.1365	FBgn0025864	CG12737	Crag	Calmodulin-binding protein related to a Rab3 GDP/GTP exchange protein	31800	5085 // guanyl-nucleotide exchange factor activity // inferred from sequence or structural similarity /// 5085 // guanyl-nucleotide exchange factor activity // non-traceable author statement /// 5516 // calmodulin binding // inferred from direct assay /// 5085 // guanyl-nucleotide exchange factor activity // inferred from sequence similarity	7165 // signal transduction // inferred from electronic annotation /// 7601 // visual perception // inferred from electronic annotation	---	IPR005112 // dDENN domain // 1.2E-34 /// IPR001194 // DENN (AEX-3) domain // 2.3E-62 /// IPR005113 // uDENN domain // 8.0E-9
13923	155122_at	0.405387	0.226096	5.95053	1.33731e-06	1.72838e-05	5.12999	FBgn0030569	CG9411	CG9411	CG9411	32392	---	---	---	---
12364	153563_at	0.371389	0.624282	5.94797	1.34718e-06	1.73793e-05	5.12273	FBgn0032499	CG6116	CG6116	CG6116	34735	---	---	---	---
13425	154624_at	0.431052	0.686853	5.94757	1.34871e-06	1.73831e-05	5.12161	FBgn0026196	CG10206	nop5	nop5	33966	3729 // mRNA binding // inferred from electronic annotation /// 5515 // protein binding // inferred from physical interaction	6364 // rRNA processing // non-traceable author statement /// 16072 // rRNA metabolism // inferred from electronic annotation	5875 // microtubule associated complex // inferred from sequence or structural similarity /// 5875 // microtubule associated complex // inferred from sequence similarity	IPR002687 // Pre-mRNA processing ribonucleoprotein, binding region // 6.6E-84
12023	153222_at	0.579548	1.01093	5.94588	1.35525e-06	1.74513e-05	5.11683	FBgn0030274	CG1908	CG1908	CG1908	32055	5515 // protein binding // inferred from physical interaction	---	---	---
10021	151220_at	0.358812	0.126117	5.94551	1.35672e-06	1.74543e-05	5.11576	---	---	---	---	---	---	---	---	---
10335	151534_at	0.724268	1.09074	5.94415	1.36202e-06	1.75063e-05	5.11192	FBgn0029761	CG10706	SK	small conductance calcium-activated potassium channel	31456	4623 // phospholipase A2 activity // inferred from electronic annotation /// 4965 // GABA-B receptor activity // inferred from electronic annotation /// 5249 // voltage-gated potassium channel activity // inferred from electronic annotation /// 5509 // calcium ion binding // inferred from electronic annotation /// 5516 // calmodulin binding // inferred from electronic annotation /// 15269 // calc…	6812 // cation transport // inferred from electronic annotation /// 6813 // potassium ion transport // inferred from electronic annotation /// 7268 // synaptic transmission // inferred from electronic annotation /// 16042 // lipid catabolism // inferred from electronic annotation	8076 // voltage-gated potassium channel complex // inferred from electronic annotation /// 16020 // membrane // inferred from electronic annotation /// 16021 // integral to membrane // inferred from electronic annotation	IPR003931 // Calcium-activated SK potassium channel // 1.1E-78 /// IPR004178 // Calmodulin binding domain // 1.8E-52 /// IPR003931 // Calcium-activated SK potassium channel // 1.1E-78 /// IPR004178 // Calmodulin binding domain // 1.8E-52
6843	148042_at	0.377104	0.29997	5.9402	1.37756e-06	1.76667e-05	5.10073	FBgn0035336	CG9004	CG9004	CG9004	38303	3729 // mRNA binding // inferred from electronic annotation /// 3723 // RNA binding // inferred from electronic annotation	6412 // protein biosynthesis // inferred from electronic annotation	---	IPR003890 // Initiation factor eIF-4 gamma, middle // 5.5E-38 /// IPR003891 // Initiation factor eIF-4 gamma, MA3 // 4.3E-36
6571	147770_at	0.323777	0.0787371	5.93624	1.3933e-06	1.78343e-05	5.08951	FBgn0034854	CG3493	CG3493	CG3493	37702	---	6886 // intracellular protein transport // inferred from electronic annotation	---	IPR000237 // GRIP domain // 1.2E-15
10301	151500_at	0.3158	1.12563	5.93573	1.39535e-06	1.78343e-05	5.08806	FBgn0053248	CG33248	CG33248	CG33248	2768893	---	---	---	IPR001849 // Pleckstrin-like // 6.2E-11
13931	155130_at	0.442021	0.943061	5.93545	1.39645e-06	1.78343e-05	5.08728	FBgn0002791	CG3060	mr	morula	45906	16874 // ligase activity // inferred from electronic annotation /// 5515 // protein binding // inferred from physical interaction /// 3677 // DNA binding // inferred from electronic annotation	74 // regulation of progression through cell cycle // inferred from electronic annotation /// 74 // regulation of progression through cell cycle // traceable author statement /// 90 // mitotic anaphase // non-traceable author statement /// 7049 // cell cycle // inferred from electronic annotation /// 7067 // mitosis // inferred from electronic annotation /// 45886 // negative regulation of synapt…	5680 // anaphase-promoting complex // non-traceable author statement /// 5680 // anaphase-promoting complex // traceable author statement /// 5634 // nucleus // inferred from electronic annotation	---
8725	149924_at	0.393013	0.278455	5.93144	1.41264e-06	1.7992e-05	5.07591	FBgn0067629	CG33332	CG33332	CG33332	2768669	---	---	---	---
5104	146303_at	0.413402	0.205402	5.92881	1.42333e-06	1.81116e-05	5.06847	FBgn0040506	CG17178	ACXE	ACXE	53426	4016 // adenylate cyclase activity // inferred from sequence or structural similarity /// 4016 // adenylate cyclase activity // non-traceable author statement /// 4383 // guanylate cyclase activity // inferred from electronic annotation /// 16829 // lyase activity // inferred from electronic annotation /// 16849 // phosphorus-oxygen lyase activity // inferred from electronic annotation /// 4016 /…	7186 // G-protein coupled receptor protein signaling pathway // inferred from electronic annotation /// 7242 // intracellular signaling cascade // inferred from electronic annotation /// 9187 // cyclic nucleotide metabolism // inferred from electronic annotation /// 9190 // cyclic nucleotide biosynthesis // inferred from electronic annotation	---	IPR001054 // Guanylate cyclase // 4.1E-45 /// IPR001054 // Guanylate cyclase // 2.3E-7 /// IPR001054 // Guanylate cyclase // 5.0E-28
12252	153451_at	0.419844	2.48989	5.92503	1.43886e-06	1.82925e-05	5.05777	FBgn0013762	CG8203	Cdk5	Cyclin-dependent kinase 5	36727	4674 // protein serine/threonine kinase activity // non-traceable author statement /// 4693 // cyclin-dependent protein kinase activity // inferred from sequence or structural similarity /// 4702 // receptor signaling protein serine/threonine kinase activity // inferred from electronic annotation /// 5524 // ATP binding // inferred from electronic annotation /// 30332 // cyclin binding // non-tra…	74 // regulation of progression through cell cycle // inferred from electronic annotation /// 6468 // protein amino acid phosphorylation // inferred from sequence or structural similarity /// 6468 // protein amino acid phosphorylation // non-traceable author statement /// 7049 // cell cycle // inferred from mutant phenotype /// 7067 // mitosis // inferred from electronic annotation /// 7269 // ne…	---	IPR000719 // Protein kinase // 2.4E-97
10338	151537_at	0.695395	1.01082	5.92426	1.44208e-06	1.83003e-05	5.05556	FBgn0053278	CG33278	CG33278	CG33278	2768946	---	---	---	---
141	141340_at	0.378782	1.00136	5.9232	1.44644e-06	1.8339e-05	5.05258	FBgn0034439	CG10062	CG10062	CG10062	37224	8233 // peptidase activity // inferred from electronic annotation	6508 // proteolysis // inferred from electronic annotation	---	IPR007484 // Peptidase M28 // 3.4E-8
6201	147400_at	0.3288	-0.433357	5.90963	1.50394e-06	1.8948e-05	5.01412	FBgn0034281	CG14490	CG14490	CG14490	37041	---	---	---	IPR003409 // MORN motif // 2.4E-4 /// IPR003409 // MORN motif // 1.1E-4 /// IPR003409 // MORN motif // 6.3E-8 /// IPR003409 // MORN motif // 4.3E-6 /// IPR003409 // MORN motif // 2.1E-5 /// IPR003409 // MORN motif // 6.3E-4
4072	145271_at	0.471418	1.70615	5.90558	1.52152e-06	1.91179e-05	5.00265	FBgn0003380	CG12348	Sh	Shaker	32780	5249 // voltage-gated potassium channel activity // inferred from sequence or structural similarity /// 5249 // voltage-gated potassium channel activity // non-traceable author statement /// 5249 // voltage-gated potassium channel activity // traceable author statement /// 5515 // protein binding // inferred from electronic annotation /// 5216 // ion channel activity // inferred from electronic a…	6813 // potassium ion transport // non-traceable author statement /// 6813 // potassium ion transport // traceable author statement /// 7611 // learning and/or memory // non-traceable author statement /// 7619 // courtship behavior // non-traceable author statement /// 7619 // courtship behavior // traceable author statement /// 7629 // flight behavior // inferred from mutant phenotype /// 30431 …	8076 // voltage-gated potassium channel complex // non-traceable author statement /// 8076 // voltage-gated potassium channel complex // traceable author statement /// 16021 // integral to membrane // non-traceable author statement /// 8076 // voltage-gated potassium channel complex // inferred from electronic annotation /// 16020 // membrane // inferred from electronic annotation /// 16021 // in…	IPR005821 // Ion transport protein // 2.5E-53 /// IPR003131 // K+ channel tetramerisation // 5.6E-50 /// IPR005821 // Ion transport protein // 2.5E-53 /// IPR003131 // K+ channel tetramerisation // 5.6E-50
10026	151225_at	0.384779	-0.296231	5.90144	1.53973e-06	1.92776e-05	4.99092	---	---	---	---	---	---	---	---	---
754	141953_at	0.517593	0.914003	5.90048	1.54397e-06	1.9279e-05	4.9882	---	---	---	---	---	---	---	---	---
1253	142452_at	0.580422	2.39895	5.90083	1.54244e-06	1.9279e-05	4.98918	FBgn0003498	CG16901	sqd	squid	41666	3729 // mRNA binding // inferred from sequence or structural similarity /// 3729 // mRNA binding // non-traceable author statement /// 3730 // mRNA 3'-UTR binding // traceable author statement /// 166 // nucleotide binding // inferred from electronic annotation /// 3676 // nucleic acid binding // inferred from electronic annotation /// 3723 // RNA binding // inferred from electronic annotation //…	184 // mRNA catabolism, nonsense-mediated decay // traceable author statement /// 381 // regulation of alternative nuclear mRNA splicing, via spliceosome // inferred from mutant phenotype /// 6405 // RNA export from nucleus // traceable author statement /// 6406 // mRNA export from nucleus // non-traceable author statement /// 7297 // follicle cell migration (sensu Insecta) // inferred from mutan…	785 // chromatin // inferred from direct assay /// 5634 // nucleus // Unknown /// 5634 // nucleus // inferred from direct assay /// 5634 // nucleus // traceable author statement /// 5703 // polytene chromosome puff // inferred from direct assay /// 5730 // nucleolus // inferred from direct assay /// 5737 // cytoplasm // traceable author statement /// 30529 // ribonucleoprotein complex // inferred…	IPR000504 // RNA-binding region RNP-1 (RNA recognition motif) // 3.2E-26 /// IPR000504 // RNA-binding region RNP-1 (RNA recognition motif) // 2.6E-21
12012	153211_at	0.431855	0.533501	5.89383	1.57379e-06	1.96338e-05	4.96933	FBgn0004872	CG6122	piwi	piwi	34521	3729 // mRNA binding // non-traceable author statement	1709 // cell fate determination // traceable author statement /// 6342 // chromatin silencing // inferred from mutant phenotype /// 7292 // female gamete generation // inferred from electronic annotation /// 16246 // RNA interference // traceable author statement /// 16441 // posttranscriptional gene silencing // inferred from mutant phenotype /// 17145 // stem cell division // inferred from muta…	5634 // nucleus // traceable author statement /// 5654 // nucleoplasm // non-traceable author statement /// 5654 // nucleoplasm // traceable author statement /// 5737 // cytoplasm // non-traceable author statement /// 5634 // nucleus // inferred from electronic annotation	IPR003165 // Stem cell self-renewal protein Piwi // 1.0E-126
8221	149420_at	0.467008	2.55364	5.89206	1.5818e-06	1.97162e-05	4.96433	FBgn0037468	CG1943	CG1943	CG1943	40844	5515 // protein binding // inferred from physical interaction	---	---	---
12960	154159_at	0.405634	2.4905	5.89161	1.58383e-06	1.9724e-05	4.96306	FBgn0027504	CG8878	CG8878	CG8878	36302	4672 // protein kinase activity // non-traceable author statement /// 4674 // protein serine/threonine kinase activity // inferred from sequence or structural similarity /// 5524 // ATP binding // inferred from electronic annotation /// 166 // nucleotide binding // inferred from electronic annotation /// 4672 // protein kinase activity // inferred from electronic annotation /// 4674 // protein se…	6468 // protein amino acid phosphorylation // non-traceable author statement /// 6468 // protein amino acid phosphorylation // inferred from electronic annotation	---	IPR000719 // Protein kinase // 0.0020 /// IPR000719 // Protein kinase // 0.11
9802	151001_at	0.380501	-0.225076	5.88923	1.59473e-06	1.97995e-05	4.95629	FBgn0039939	CG11231	CG11231	CG11231	43845	---	---	---	---
12762	153961_at	0.422588	0.798139	5.88814	1.59971e-06	1.98336e-05	4.95322	FBgn0010314	CG3738	Cks30A	Cyclin-dependent kinase subunit 30A	34250	4674 // protein serine/threonine kinase activity // non-traceable author statement /// 4693 // cyclin-dependent protein kinase activity // inferred from sequence or structural similarity /// 5515 // protein binding // inferred from physical interaction /// 16538 // cyclin-dependent protein kinase regulator activity // inferred from sequence or structural similarity /// 16538 // cyclin-dependent p…	74 // regulation of progression through cell cycle // inferred from electronic annotation /// 6468 // protein amino acid phosphorylation // inferred from sequence or structural similarity /// 6468 // protein amino acid phosphorylation // non-traceable author statement /// 45842 // positive regulation of mitotic metaphase/anaphase transition // non-traceable author statement /// 7049 // cell cycle…	---	IPR000789 // Cyclin-dependent kinase, regulatory subunit // 1.4E-54
2212	143411_at	0.374046	1.58065	5.88634	1.60798e-06	1.99185e-05	4.94813	FBgn0003997	CG5123	W	Wrinkled	40009	5515 // protein binding // inferred from physical interaction	1700 // embryonic development (sensu Insecta) // traceable author statement /// 2165 // larval or pupal development (sensu Insecta) // inferred from mutant phenotype /// 6915 // apoptosis // non-traceable author statement /// 6915 // apoptosis // traceable author statement /// 6917 // induction of apoptosis // inferred from genetic interaction /// 6917 // induction of apoptosis // inferred from m…	---	---
9654	150853_at	0.697564	5.54799	5.88489	1.61472e-06	1.99843e-05	4.944	FBgn0039713	CG7808	RpS8	Ribosomal protein S8	43532	3676 // nucleic acid binding // inferred from electronic annotation /// 3735 // structural constituent of ribosome // inferred from sequence or structural similarity /// 5515 // protein binding // inferred from physical interaction /// 3735 // structural constituent of ribosome // inferred from sequence similarity	6412 // protein biosynthesis // inferred from sequence or structural similarity /// 6412 // protein biosynthesis // inferred from sequence similarity	5843 // cytosolic small ribosomal subunit (sensu Eukaryota) // inferred from sequence or structural similarity /// 5622 // intracellular // inferred from electronic annotation /// 30529 // ribonucleoprotein complex // inferred from electronic annotation /// 5843 // cytosolic small ribosomal subunit (sensu Eukaryota) // inferred from sequence similarity	IPR001047 // Ribosomal protein S8E // 8.9E-106
963	142162_at	0.317191	1.58727	5.88285	1.62423e-06	2.00842e-05	4.93821	FBgn0011740	CG18802	Man-II	Mannosidase II	41126	4559 // alpha-mannosidase activity // inferred from electronic annotation /// 4572 // mannosyl-oligosaccharide 1,3-1,6-alpha-mannosidase activity // inferred from sequence or structural similarity /// 4572 // mannosyl-oligosaccharide 1,3-1,6-alpha-mannosidase activity // non-traceable author statement /// 16799 // hydrolase activity, hydrolyzing N-glycosyl compounds // inferred from electronic an…	5975 // carbohydrate metabolism // inferred from electronic annotation /// 6486 // protein amino acid glycosylation // inferred from sequence or structural similarity /// 6487 // protein amino acid N-linked glycosylation // non-traceable author statement /// 6013 // mannose metabolism // inferred from electronic annotation /// 6486 // protein amino acid glycosylation // inferred from sequence sim…	139 // Golgi membrane // inferred from sequence or structural similarity /// 139 // Golgi membrane // non-traceable author statement /// 5783 // endoplasmic reticulum // non-traceable author statement /// 5795 // Golgi stack // non-traceable author statement /// 5795 // Golgi stack // inferred from electronic annotation /// 16020 // membrane // inferred from electronic annotation /// 16021 // int…	IPR000602 // Glycoside hydrolase, family 38 // 1.0E-126
7132	148331_at	0.469086	0.157285	5.8797	1.63896e-06	2.02485e-05	4.92931	FBgn0052379	CG32379	CG32379	CG32379	326211	4180 // carboxypeptidase activity // inferred from sequence or structural similarity /// 4182 // carboxypeptidase A activity // inferred from electronic annotation /// 8233 // peptidase activity // inferred from electronic annotation /// 8237 // metallopeptidase activity // inferred from electronic annotation /// 4180 // carboxypeptidase activity // inferred from sequence similarity	6508 // proteolysis // inferred from electronic annotation /// 6508 // proteolysis // inferred from sequence or structural similarity /// 19538 // protein metabolism // inferred from electronic annotation /// 6508 // proteolysis // inferred from sequence similarity	---	IPR000834 // Peptidase M14, carboxypeptidase A // 6.8E-64
11696	152895_at	0.424142	0.11103	5.87559	1.65844e-06	2.04711e-05	4.91765	FBgn0037050	CG10566	CG10566	CG10566	40331	5515 // protein binding // inferred from physical interaction	---	---	IPR010504 // Arfaptin-like // 2.2E-118
1180	142379_s_at	0.493722	0.302132	5.87451	1.66362e-06	2.0499e-05	4.91457	FBgn0037931	CG18476	CG18476	CG18476	41404	3676 // nucleic acid binding // inferred from electronic annotation /// 8270 // zinc ion binding // inferred from electronic annotation /// 30528 // transcription regulator activity // inferred from electronic annotation /// 5515 // protein binding // inferred from physical interaction /// 46872 // metal ion binding // inferred from electronic annotation	6139 // nucleobase, nucleoside, nucleotide and nucleic acid metabolism // inferred from electronic annotation /// 6357 // regulation of transcription from RNA polymerase II promoter // inferred from electronic annotation /// 6366 // transcription from RNA polymerase II promoter // inferred from electronic annotation	5634 // nucleus // inferred from electronic annotation	IPR007087 // Zn-finger, C2H2 type // 8.6E-5 /// IPR007087 // Zn-finger, C2H2 type // 8.2E-5 /// IPR007087 // Zn-finger, C2H2 type // 6.8E-5 /// IPR007087 // Zn-finger, C2H2 type // 5.6E-5 /// IPR007087 // Zn-finger, C2H2 type // 1.8E-6 /// IPR007087 // Zn-finger, C2H2 type // 2.0E-4 /// IPR007087 // Zn-finger, C2H2 type // 8.2E-5
5426	146625_at	0.433958	0.0789404	5.87341	1.66888e-06	2.05458e-05	4.91146	---	---	---	---	---	---	---	---	---
2632	143831_at	0.429942	0.116858	5.87118	1.67959e-06	2.06412e-05	4.90515	FBgn0015615	CG9802	Cap	Chromosome-associated protein	32627	3676 // nucleic acid binding // inferred from electronic annotation /// 3682 // chromatin binding // inferred from electronic annotation /// 5524 // ATP binding // inferred from electronic annotation /// 16887 // ATPase activity // inferred from electronic annotation /// 5515 // protein binding // inferred from electronic annotation	7059 // chromosome segregation // inferred from electronic annotation /// 7062 // sister chromatid cohesion // inferred from sequence or structural similarity /// 7067 // mitosis // inferred from electronic annotation /// 51276 // chromosome organization and biogenesis // inferred from electronic annotation /// 7062 // sister chromatid cohesion // inferred from sequence similarity	5634 // nucleus // inferred from electronic annotation /// 8278 // cohesin complex // inferred from sequence or structural similarity /// 8278 // cohesin complex // non-traceable author statement /// 5694 // chromosome // inferred from electronic annotation /// 8278 // cohesin complex // inferred from sequence similarity	IPR003405 // Structural maintenance of chromosome protein SMC, C-terminal // 1.8E-21 /// IPR003395 // SMC protein, N-terminal // 3.9E-71 /// IPR000533 // Tropomyosin // 6.2E-4 /// IPR010935 // SMCs flexible hinge // 1.7E-34 /// IPR003405 // Structural maintenance of chromosome protein SMC, C-terminal // 1.8E-21 /// IPR000533 // Tropomyosin // 6.2E-4 /// IPR010935 // SMCs flexible hinge // 1.7E-34
4788	145987_at	0.594532	0.222935	5.86764	1.69679e-06	2.08344e-05	4.8951	FBgn0031955	CG14535	CG14535	CG14535	34073	3774 // motor activity // inferred from electronic annotation /// 5524 // ATP binding // inferred from electronic annotation	---	5875 // microtubule associated complex // inferred from electronic annotation	---
1400	142599_at	0.593011	1.33237	5.86554	1.70704e-06	2.09235e-05	4.88916	FBgn0051151	CG31151	CG31151	CG31151	42687	3677 // DNA binding // inferred from electronic annotation /// 5515 // protein binding // inferred from physical interaction	---	---	IPR001025 // Bromo adjacent region // 1.0E-14 /// IPR001025 // Bromo adjacent region // 1.0E-14
389	141588_at	0.596746	1.03843	5.85629	1.75305e-06	2.13939e-05	4.86293	FBgn0003742	CG10128	tra2	transformer 2	36619	3729 // mRNA binding // inferred from sequence or structural similarity /// 3729 // mRNA binding // non-traceable author statement /// 5515 // protein binding // inferred from physical interaction /// 166 // nucleotide binding // inferred from electronic annotation /// 3676 // nucleic acid binding // inferred from electronic annotation /// 3723 // RNA binding // inferred from electronic annotatio…	3 // reproduction // inferred from mutant phenotype /// 3 // reproduction // non-traceable author statement /// 245 // spliceosome assembly // non-traceable author statement /// 6397 // mRNA processing // inferred from mutant phenotype /// 6397 // mRNA processing // non-traceable author statement /// 7283 // spermatogenesis // non-traceable author statement /// 7530 // sex determination // non-tr…	---	IPR000504 // RNA-binding region RNP-1 (RNA recognition motif) // 3.4E-25 /// IPR000504 // RNA-binding region RNP-1 (RNA recognition motif) // 3.4E-25 /// IPR000504 // RNA-binding region RNP-1 (RNA recognition motif) // 3.3E-7 /// IPR000504 // RNA-binding region RNP-1 (RNA recognition motif) // 3.4E-25
12822	154021_at	0.319138	0.483757	5.85558	1.75666e-06	2.14178e-05	4.8609	FBgn0031456	CG2848	Trn-SR	Transportin-Serine/Arginine rich	33465	3677 // DNA binding // inferred from electronic annotation /// 5215 // transporter activity // inferred from electronic annotation /// 5515 // protein binding // inferred from physical interaction /// 8565 // protein transporter activity // inferred from electronic annotation /// 5488 // binding // inferred from electronic annotation	59 // protein import into nucleus, docking // inferred from electronic annotation /// 6355 // regulation of transcription, DNA-dependent // inferred from electronic annotation /// 6406 // mRNA export from nucleus // inferred from sequence or structural similarity /// 6606 // protein import into nucleus // inferred from sequence or structural similarity /// 35048 // splicing factor protein import …	5634 // nucleus // inferred from direct assay /// 5643 // nuclear pore // inferred from electronic annotation /// 5737 // cytoplasm // inferred from direct assay /// 5634 // nucleus // inferred from electronic annotation /// 5737 // cytoplasm // inferred from electronic annotation	IPR001494 // Importin-beta, N-terminal // 3.5E-16
13684	154883_at	0.396491	2.45748	5.8553	1.75807e-06	2.14178e-05	4.86011	FBgn0035848	CG7979	CG7979	CG7979	38911	175 // 3'-5'-exoribonuclease activity // inferred from electronic annotation /// 3729 // mRNA binding // inferred from electronic annotation /// 8460 // dTDP-glucose 4,6-dehydratase activity // inferred from sequence or structural similarity /// 3723 // RNA binding // inferred from electronic annotation /// 3824 // catalytic activity // inferred from electronic annotation /// 51287 // NAD binding…	5975 // carbohydrate metabolism // inferred from electronic annotation /// 6396 // RNA processing // inferred from electronic annotation /// 9225 // nucleotide-sugar metabolism // inferred from electronic annotation	---	IPR001509 // NAD-dependent epimerase/dehydratase // 2.8E-26
3902	145101_at	0.407142	0.165495	5.8522	1.77379e-06	2.15719e-05	4.85132	FBgn0030611	CG15027	CG15027	CG15027	32440	---	---	---	---
10458	151657_at	0.38562	2.64855	5.85104	1.77971e-06	2.16251e-05	4.84804	FBgn0034378	CG18604	CG18604	CG18604	37154	4674 // protein serine/threonine kinase activity // inferred from electronic annotation /// 5524 // ATP binding // inferred from electronic annotation	6468 // protein amino acid phosphorylation // inferred from electronic annotation	---	---
8539	149738_r_at	0.482671	0.321517	5.84839	1.79334e-06	2.17719e-05	4.84051	---	---	---	---	---	---	---	---	---
10671	151870_at	0.532662	2.39198	5.84035	1.83525e-06	2.21845e-05	4.81773	FBgn0035101	CG1212	p130CAS	p130CAS	38021	5200 // structural constituent of cytoskeleton // inferred from electronic annotation /// 5351 // sugar porter activity // inferred from electronic annotation	74 // regulation of progression through cell cycle // inferred from electronic annotation /// 7016 // cytoskeletal anchoring // inferred from sequence or structural similarity /// 7155 // cell adhesion // inferred from electronic annotation /// 9401 // phosphoenolpyruvate-dependent sugar phosphotransferase system // inferred from electronic annotation /// 7016 // cytoskeletal anchoring // inferre…	5925 // focal adhesion // inferred from sequence or structural similarity /// 5925 // focal adhesion // inferred from sequence similarity	IPR001452 // SH3 // 1.1E-11
5077	146276_at	0.409226	0.130044	5.83738	1.85103e-06	2.2356e-05	4.80929	FBgn0032416	CG17213	Gr33a	Gustatory receptor 33a	34641	8527 // taste receptor activity // non-traceable author statement	50909 // sensory perception of taste // non-traceable author statement	16021 // integral to membrane // non-traceable author statement	---
5425	146624_at	0.633022	-0.742643	5.83537	1.86175e-06	2.2466e-05	4.80359	FBgn0032991	CG16937	CG16937	CG16937	35457	---	---	---	---
12602	153801_at	0.322723	0.622751	5.83507	1.86334e-06	2.2466e-05	4.80275	FBgn0035838	CG7942	CG7942	CG7942	38900	3676 // nucleic acid binding // inferred from electronic annotation /// 8419 // RNA lariat debranching enzyme activity // inferred from sequence or structural similarity /// 5515 // protein binding // inferred from physical interaction /// 16787 // hydrolase activity // inferred from electronic annotation /// 16788 // hydrolase activity, acting on ester bonds // inferred from electronic annotatio…	398 // nuclear mRNA splicing, via spliceosome // inferred from electronic annotation /// 6396 // RNA processing // inferred from sequence or structural similarity /// 6397 // mRNA processing // inferred from electronic annotation /// 6396 // RNA processing // inferred from sequence similarity	5681 // spliceosome complex // inferred from electronic annotation	IPR004843 // Metallo-phosphoesterase // 2.1E-17 /// IPR007708 // Lariat debranching enzyme, C-terminal // 1.0E-99
13193	154392_at	0.464858	-0.05577	5.82278	1.93036e-06	2.31544e-05	4.7679	FBgn0038672	CG6005	CG6005	CG6005	42279	---	---	---	---
764	141963_at	0.43852	0.499587	5.82202	1.93459e-06	2.31853e-05	4.76574	---	---	---	---	---	---	---	---	---
13796	154995_at	0.604002	1.55082	5.81978	1.94709e-06	2.33152e-05	4.75939	FBgn0020622	CG2699	Pi3K21B	Pi3K21B	33203	16303 // phosphatidylinositol 3-kinase activity // inferred from electronic annotation /// 19900 // kinase binding // inferred from physical interaction /// 35014 // phosphoinositide 3-kinase regulator activity // inferred from sequence or structural similarity /// 35014 // phosphoinositide 3-kinase regulator activity // non-traceable author statement /// 5515 // protein binding // inferred from …	6468 // protein amino acid phosphorylation // inferred from direct assay /// 7242 // intracellular signaling cascade // inferred from electronic annotation /// 8286 // insulin receptor signaling pathway // traceable author statement /// 8361 // regulation of cell size // inferred from mutant phenotype /// 42127 // regulation of cell proliferation // inferred from mutant phenotype /// 45793 // pos…	5942 // phosphoinositide 3-kinase complex // non-traceable author statement /// 35030 // phosphoinositide 3-kinase complex, class IA // non-traceable author statement /// 35030 // phosphoinositide 3-kinase complex, class IA // inferred from physical interaction /// 5942 // phosphoinositide 3-kinase complex // inferred from electronic annotation	IPR000980 // SH2 motif // 6.2E-28 /// IPR000980 // SH2 motif // 8.6E-19
12667	153866_at	1.03172	3.30365	5.81592	1.96888e-06	2.35358e-05	4.74842	FBgn0016926	CG4710	smi21F	smell impaired 21F	33288	---	42048 // olfactory behavior // inferred from mutant phenotype /// 42221 // response to chemical stimulus // inferred from mutant phenotype	---	---
5112	146311_at	0.940259	3.74234	5.81511	1.97344e-06	2.35702e-05	4.74614	FBgn0032472	CG9928	CG9928	CG9928	34704	5515 // protein binding // inferred from physical interaction	---	---	---
9847	151046_at	0.399847	-0.159002	5.81255	1.98802e-06	2.37242e-05	4.73887	FBgn0038226	CG31319	RhoGAP88C	RhoGAP88C	41749	5100 // Rho GTPase activator activity // inferred from sequence or structural similarity /// 5100 // Rho GTPase activator activity // inferred from sequence similarity	7242 // intracellular signaling cascade // inferred from electronic annotation	---	IPR002913 // Lipid-binding START // 1.6E-24 /// IPR000198 // RhoGAP domain // 7.8E-55
78	141277_at	0.358047	1.24206	5.80907	2.00801e-06	2.39017e-05	4.72901	FBgn0037967	CG3281	CG3281	CG3281	41445	3676 // nucleic acid binding // inferred from electronic annotation /// 3677 // DNA binding // inferred from electronic annotation /// 8270 // zinc ion binding // inferred from electronic annotation /// 30528 // transcription regulator activity // inferred from electronic annotation /// 5515 // protein binding // inferred from physical interaction /// 46872 // metal ion binding // inferred from e…	6139 // nucleobase, nucleoside, nucleotide and nucleic acid metabolism // inferred from electronic annotation /// 6334 // nucleosome assembly // inferred from electronic annotation /// 6357 // regulation of transcription from RNA polymerase II promoter // inferred from electronic annotation /// 6366 // transcription from RNA polymerase II promoter // inferred from electronic annotation /// 7001 /…	786 // nucleosome // inferred from electronic annotation /// 5634 // nucleus // inferred from electronic annotation	IPR007087 // Zn-finger, C2H2 type // 1.1E-5 /// IPR007087 // Zn-finger, C2H2 type // 7.7E-6 /// IPR007087 // Zn-finger, C2H2 type // 1.6E-4 /// IPR007087 // Zn-finger, C2H2 type // 2.3E-6
2215	143414_at	0.463761	0.428046	5.80207	2.04889e-06	2.43263e-05	4.70913	FBgn0004009	CG4889	wg	wingless	34009	4871 // signal transducer activity // traceable author statement /// 5102 // receptor binding // non-traceable author statement /// 5110 // frizzled-2 binding // inferred from direct assay /// 5110 // frizzled-2 binding // inferred from genetic interaction /// 5110 // frizzled-2 binding // non-traceable author statement /// 5112 // Notch binding // traceable author statement /// 16015 // morphoge…	1708 // cell fate specification // traceable author statement /// 1745 // compound eye morphogenesis (sensu Endopterygota) // inferred from mutant phenotype /// 2168 // larval development (sensu Insecta) // traceable author statement /// 6357 // regulation of transcription from RNA polymerase II promoter // traceable author statement /// 6916 // anti-apoptosis // traceable author statement /// 72…	5576 // extracellular region // non-traceable author statement /// 5576 // extracellular region // traceable author statement /// 16023 // cytoplasmic membrane-bound vesicle // non-traceable author statement /// 45121 // lipid raft // inferred from direct assay /// 5576 // extracellular region // inferred from electronic annotation	IPR005817 // Wnt superfamily // 4.9E-126 /// IPR005817 // Wnt superfamily // 1.0E-61 /// IPR005817 // Wnt superfamily // 4.9E-126 /// IPR005817 // Wnt superfamily // 1.0E-61
2534	143733_at	0.441468	5.18857	5.79945	2.06436e-06	2.44684e-05	4.70172	FBgn0013981	CG3379	His4r	Histone H4 replacement	41773	3677 // DNA binding // non-traceable author statement /// 3677 // DNA binding // inferred from direct assay /// 3677 // DNA binding // inferred from electronic annotation	6333 // chromatin assembly or disassembly // non-traceable author statement /// 16321 // female meiosis chromosome segregation // inferred from mutant phenotype /// 6334 // nucleosome assembly // inferred from direct assay /// 6334 // nucleosome assembly // inferred from electronic annotation /// 7001 // chromosome organization and biogenesis (sensu Eukaryota) // inferred from electronic annotati…	786 // nucleosome // non-traceable author statement /// 786 // nucleosome // inferred from direct assay /// 35059 // RCAF complex // inferred from direct assay /// 786 // nucleosome // inferred from electronic annotation /// 5634 // nucleus // inferred from electronic annotation /// 5694 // chromosome // inferred from electronic annotation /// 786 // nucleosome // traceable author statement	IPR007125 // Histone core // 2.0E-12
8166	149365_at	0.470354	0.0124818	5.7952	2.08977e-06	2.47324e-05	4.68966	FBgn0037399	CG15581	Or83c	Odorant receptor 83c	40744	4984 // olfactory receptor activity // inferred from sequence or structural similarity /// 5549 // odorant binding // inferred from electronic annotation /// 4984 // olfactory receptor activity // inferred from sequence similarity	7608 // sensory perception of smell // inferred from sequence or structural similarity /// 7608 // sensory perception of smell // inferred from sequence similarity	16021 // integral to membrane // inferred from sequence or structural similarity /// 16021 // integral to membrane // inferred from sequence similarity	---
20	141219_at	0.409707	0.670192	5.78868	2.12936e-06	2.51114e-05	4.67115	FBgn0032517	CG7099	CG7099	CG7099	34753	3677 // DNA binding // inferred from electronic annotation /// 3700 // transcription factor activity // inferred from electronic annotation /// 3712 // transcription cofactor activity // inferred from electronic annotation /// 30528 // transcription regulator activity // inferred from electronic annotation	6139 // nucleobase, nucleoside, nucleotide and nucleic acid metabolism // inferred from electronic annotation /// 6355 // regulation of transcription, DNA-dependent // inferred from electronic annotation	5634 // nucleus // inferred from electronic annotation	---
11114	152313_at	0.681409	2.38909	5.78699	2.13977e-06	2.51706e-05	4.66634	FBgn0015714	CG10241	Cyp6a17	Cyp6a17	45556	4497 // monooxygenase activity // inferred from electronic annotation /// 16491 // oxidoreductase activity // inferred from electronic annotation /// 5506 // iron ion binding // inferred from electronic annotation /// 20037 // heme binding // inferred from electronic annotation /// 46872 // metal ion binding // inferred from electronic annotation	6118 // electron transport // inferred from electronic annotation /// 8202 // steroid metabolism // inferred from electronic annotation	5792 // microsome // non-traceable author statement /// 16020 // membrane // non-traceable author statement /// 5783 // endoplasmic reticulum // inferred from electronic annotation /// 5792 // microsome // inferred from electronic annotation /// 16020 // membrane // inferred from electronic annotation	IPR001128 // Cytochrome P450 // 8.8E-117
12790	153989_at	0.442063	1.08361	5.7821	2.17007e-06	2.54843e-05	4.65248	FBgn0027537	CG11092	CG11092	CG11092	32350	5215 // transporter activity // inferred from electronic annotation /// 5515 // protein binding // inferred from physical interaction	6605 // protein targeting // inferred from electronic annotation /// 6810 // transport // inferred from electronic annotation	5643 // nuclear pore // inferred from sequence or structural similarity /// 5643 // nuclear pore // inferred from electronic annotation /// 5643 // nuclear pore // inferred from sequence similarity	IPR007231 // Nucleoporin interacting component // 1.0E-126
10479	151678_at	0.416832	0.620872	5.78101	2.17689e-06	2.55429e-05	4.64939	FBgn0036678	CG11905	CG11905	CG11905	39895	---	---	---	---
7563	148762_at	0.582157	1.0007	5.77674	2.20382e-06	2.58372e-05	4.63726	FBgn0036440	CG17177	CG17177	CG17177	39601	---	7154 // cell communication // inferred from electronic annotation /// 7165 // signal transduction // inferred from electronic annotation	---	---
10610	151809_at	0.599623	1.52162	5.77605	2.20816e-06	2.58665e-05	4.63532	FBgn0031745	CG8965	CG8965	CG8965	33814	5515 // protein binding // inferred from physical interaction	7165 // signal transduction // inferred from electronic annotation	---	IPR000159 // RA domain // 6.4E-22 /// IPR000159 // RA domain // 3.3E-11
223	141422_at	0.579935	2.56613	5.77535	2.21265e-06	2.58974e-05	4.63332	FBgn0037925	CG17309	Csk	C-terminal Src kinase	41398	4674 // protein serine/threonine kinase activity // inferred from electronic annotation /// 4713 // protein-tyrosine kinase activity // inferred from direct assay /// 4713 // protein-tyrosine kinase activity // inferred from sequence or structural similarity /// 4713 // protein-tyrosine kinase activity // non-traceable author statement /// 4715 // non-membrane spanning protein tyrosine kinase act…	6468 // protein amino acid phosphorylation // non-traceable author statement /// 7242 // intracellular signaling cascade // inferred from electronic annotation /// 45926 // negative regulation of growth // inferred from genetic interaction /// 45926 // negative regulation of growth // inferred from mutant phenotype /// 6468 // protein amino acid phosphorylation // inferred from electronic annotat…	---	IPR000980 // SH2 motif // 3.1E-43 /// IPR000719 // Protein kinase // 4.8E-80 /// IPR000980 // SH2 motif // 3.1E-43 /// IPR000719 // Protein kinase // 4.8E-80
286	141485_at	0.371938	0.929297	5.77339	2.22517e-06	2.60223e-05	4.62776	FBgn0035033	CG3548	CG3548	CG3548	37932	5515 // protein binding // inferred from physical interaction /// 42802 // identical protein binding // inferred from physical interaction	---	---	---
12178	153377_at	0.639666	2.7777	5.77207	2.23364e-06	2.60882e-05	4.62401	FBgn0010350	CG7962	CdsA	CDP diglyceride synthetase	43950	4605 // phosphatidate cytidylyltransferase activity // inferred from sequence or structural similarity /// 4605 // phosphatidate cytidylyltransferase activity // non-traceable author statement /// 4605 // phosphatidate cytidylyltransferase activity // inferred from sequence similarity	6644 // phospholipid metabolism // inferred from electronic annotation /// 7430 // terminal branching of trachea, cytoplasmic projection extension (sensu Insecta) // non-traceable author statement /// 7602 // phototransduction // inferred from genetic interaction /// 7602 // phototransduction // inferred from mutant phenotype /// 7602 // phototransduction // non-traceable author statement /// 865…	5635 // nuclear envelope // inferred from direct assay /// 5783 // endoplasmic reticulum // inferred from direct assay /// 5790 // smooth endoplasmic reticulum // inferred from direct assay /// 5887 // integral to plasma membrane // non-traceable author statement	IPR000374 // Phosphatidate cytidylyltransferase // 1.0E-126
5306	146505_at	0.473399	0.442379	5.7716	2.23665e-06	2.60911e-05	4.62268	FBgn0032808	CG13079	CG13079	CG13079	35250	4866 // endopeptidase inhibitor activity // inferred from sequence or structural similarity /// 4866 // endopeptidase inhibitor activity // inferred from sequence similarity	---	---	IPR001599 // Alpha-2-macroglobulin // 1.5E-8 /// IPR001599 // Alpha-2-macroglobulin // 9.7E-17 /// IPR001599 // Alpha-2-macroglobulin // 4.4E-7
8475	149674_at	0.556033	5.17394	5.76775	2.26158e-06	2.62725e-05	4.61176	FBgn0037874	CG4800	Tctp	Translationally controlled tumor protein	41341	3677 // DNA binding // inferred from electronic annotation /// 4803 // transposase activity // inferred from electronic annotation /// 5200 // structural constituent of cytoskeleton // inferred from electronic annotation /// 8017 // microtubule binding // inferred from electronic annotation /// 5515 // protein binding // inferred from physical interaction /// 5509 // calcium ion binding // inferr…	6313 // DNA transposition // inferred from electronic annotation /// 6952 // defense response // inferred from electronic annotation	5737 // cytoplasm // non-traceable author statement /// 5737 // cytoplasm // inferred from electronic annotation	IPR001983 // Translationally controlled tumor protein // 8.8E-82
12095	153294_at	0.426689	0.575486	5.76575	2.27462e-06	2.63803e-05	4.60609	FBgn0035048 /// FBgn0053228	CG4806	CG4806 /// CG33228	CG4806 /// CG33228	2768732 /// 37948	3729 // mRNA binding // inferred from sequence or structural similarity /// 166 // nucleotide binding // inferred from electronic annotation /// 3676 // nucleic acid binding // inferred from electronic annotation /// 3729 // mRNA binding // inferred from sequence similarity	6139 // nucleobase, nucleoside, nucleotide and nucleic acid metabolism // inferred from electronic annotation	---	IPR000504 // RNA-binding region RNP-1 (RNA recognition motif) // 1.4E-18 /// IPR000504 // RNA-binding region RNP-1 (RNA recognition motif) // 8.6E-14 /// IPR000504 // RNA-binding region RNP-1 (RNA recognition motif) // 2.4E-5
7425	148624_at	0.612172	3.81095	5.7632	2.29136e-06	2.65525e-05	4.59886	FBgn0036232	CG14125	CG14125	CG14125	39359	---	---	---	IPR006970 // PT repeat // 0.065 /// IPR006970 // PT repeat // 3.2E-9 /// IPR002557 // Chitin binding Peritrophin-A // 1.5E-12
88	141287_at	0.322512	0.302847	5.75953	2.31571e-06	2.67281e-05	4.58844	FBgn0036301	CG4069	CG4069	CG4069	39437	5515 // protein binding // inferred from physical interaction	---	---	IPR006652 // Kelch repeat // 0.22 /// IPR006652 // Kelch repeat // 0.039 /// IPR006652 // Kelch repeat // 2.3E-6 /// IPR006652 // Kelch repeat // 0.087 /// IPR006652 // Kelch repeat // 1.9E-7
589	141788_at	0.375202	1.19014	5.7578	2.32728e-06	2.67281e-05	4.58352	FBgn0037622	CG8202	CG8202	CG8202	41043	---	---	---	---
2538	143737_at	0.406709	2.00175	5.75828	2.32411e-06	2.67281e-05	4.58487	FBgn0013995	CG5685	Calx	Na/Ca-exchange protein	42481	5432 // calcium:sodium antiporter activity // inferred from direct assay /// 5432 // calcium:sodium antiporter activity // inferred from sequence or structural similarity /// 5432 // calcium:sodium antiporter activity // traceable author statement /// 8324 // cation transporter activity // inferred from electronic annotation /// 5432 // calcium:sodium antiporter activity // inferred from electron…	6364 // rRNA processing // inferred from electronic annotation /// 6812 // cation transport // inferred from electronic annotation /// 6816 // calcium ion transport // inferred from electronic annotation /// 7154 // cell communication // inferred from electronic annotation	5886 // plasma membrane // inferred from sequence or structural similarity /// 16021 // integral to membrane // inferred from electronic annotation /// 16020 // membrane // inferred from electronic annotation /// 5886 // plasma membrane // inferred from sequence similarity	IPR004837 // Sodium/calcium exchanger membrane region // 4.9E-27 /// IPR004837 // Sodium/calcium exchanger membrane region // 1.8E-27 /// IPR003644 // Na-Ca exchanger/integrin-beta4 // 5.4E-43 /// IPR003644 // Na-Ca exchanger/integrin-beta4 // 6.1E-40
8165	149364_at	0.435525	0.565431	5.75922	2.31776e-06	2.67281e-05	4.58756	FBgn0037398	CG15580	CG15580	CG15580	40743	---	---	---	---
13802	155001_at	0.47186	2.66916	5.75907	2.31881e-06	2.67281e-05	4.58712	FBgn0033677	CG8321	CG8321	CG8321	36287	---	---	---	---
876	142075_at	0.504651	0.430684	5.75343	2.35678e-06	2.69759e-05	4.57111	---	---	---	---	---	---	---	---	---
4804	146003_at	0.512832	0.474603	5.75257	2.3626e-06	2.70205e-05	4.56867	FBgn0031976	CG7367	CG7367	CG7367	34094	4806 // triacylglycerol lipase activity // inferred from sequence or structural similarity /// 3824 // catalytic activity // inferred from electronic annotation /// 4806 // triacylglycerol lipase activity // inferred from sequence similarity	6629 // lipid metabolism // inferred from electronic annotation	---	IPR000734 // Lipase // 4.1E-47 /// IPR000734 // Lipase // 9.4E-52
1478	142677_s_at	0.833854	3.60921	5.75139	2.37066e-06	2.70905e-05	4.56532	FBgn0020386	CG1210	Pk61C	Protein kinase 61C	38017	4672 // protein kinase activity // non-traceable author statement /// 4674 // protein serine/threonine kinase activity // inferred from sequence or structural similarity /// 4674 // protein serine/threonine kinase activity // non-traceable author statement /// 4702 // receptor signaling protein serine/threonine kinase activity // inferred from electronic annotation /// 5249 // voltage-gated potas…	1558 // regulation of cell growth // inferred from mutant phenotype /// 5977 // glycogen metabolism // inferred from electronic annotation /// 6468 // protein amino acid phosphorylation // inferred from direct assay /// 6468 // protein amino acid phosphorylation // inferred from sequence or structural similarity /// 6468 // protein amino acid phosphorylation // non-traceable author statement /// …	5737 // cytoplasm // inferred from sequence or structural similarity /// 5886 // plasma membrane // inferred from sequence or structural similarity /// 8076 // voltage-gated potassium channel complex // inferred from electronic annotation /// 5737 // cytoplasm // inferred from sequence similarity /// 5886 // plasma membrane // inferred from sequence similarity	IPR000719 // Protein kinase // 3.8E-39 /// IPR000719 // Protein kinase // 5.4E-29 /// IPR000719 // Protein kinase // 3.8E-39 /// IPR000719 // Protein kinase // 5.4E-29 /// IPR000719 // Protein kinase // 3.8E-39 /// IPR000719 // Protein kinase // 5.4E-29 /// IPR000719 // Protein kinase // 1.9E-24 /// IPR000719 // Protein kinase // 5.4E-29
5200	146399_at	0.329923	-0.142084	5.74191	2.43627e-06	2.77497e-05	4.53841	---	---	---	---	---	---	---	---	---
2068	143267_at	0.330992	0.140329	5.74119	2.44133e-06	2.77623e-05	4.53636	FBgn0002775	CG8631	msl-3	male-specific lethal 3	38779	3682 // chromatin binding // inferred from direct assay /// 3682 // chromatin binding // non-traceable author statement /// 3729 // mRNA binding // traceable author statement /// 5515 // protein binding // traceable author statement /// 30528 // transcription regulator activity // inferred from sequence or structural similarity /// 5515 // protein binding // inferred from physical interaction ///…	6333 // chromatin assembly or disassembly // inferred from electronic annotation /// 6357 // regulation of transcription from RNA polymerase II promoter // inferred from electronic annotation /// 7549 // dosage compensation // inferred from mutant phenotype /// 7549 // dosage compensation // traceable author statement /// 9047 // dosage compensation, by hyperactivation of X chromosome // non-trac…	785 // chromatin // inferred from electronic annotation /// 805 // X chromosome // non-traceable author statement /// 5634 // nucleus // non-traceable author statement /// 5694 // chromosome // non-traceable author statement /// 16456 // dosage compensation complex (sensu Insecta) // non-traceable author statement /// 16456 // dosage compensation complex (sensu Insecta) // traceable author statem…	IPR008676 // MRG // 1.0E-126 /// IPR008676 // MRG // 1.0E-126
13591	154790_at	0.367549	1.3438	5.74063	2.44522e-06	2.77645e-05	4.53479	FBgn0026400	CG10009	Noa36	Noa36	43384	46872 // metal ion binding // inferred from sequence or structural similarity /// 5515 // protein binding // inferred from physical interaction /// 8270 // zinc ion binding // inferred from electronic annotation /// 46872 // metal ion binding // inferred from electronic annotation /// 46872 // metal ion binding // inferred from sequence similarity	---	775 // chromosome, pericentric region // inferred from sequence or structural similarity /// 5730 // nucleolus // inferred from sequence or structural similarity /// 5730 // nucleolus // non-traceable author statement /// 30496 // midbody // inferred from sequence or structural similarity /// 5634 // nucleus // inferred from electronic annotation /// 775 // chromosome, pericentric region // infer…	IPR010531 // NOA36 // 1.0E-126
5777	146976_at	0.424205	-0.0640878	5.73629	2.47596e-06	2.80609e-05	4.52248	FBgn0033573	CG12944	Obp47a	Odorant-binding protein 47a	36162	5549 // odorant binding // inferred from sequence or structural similarity /// 5549 // odorant binding // inferred from sequence similarity	7606 // sensory perception of chemical stimulus // inferred from sequence or structural similarity /// 7606 // sensory perception of chemical stimulus // inferred from sequence similarity	---	IPR006170 // Pheromone/general odorant binding protein, PBP/GOBP // 1.6E-21 /// IPR006170 // Pheromone/general odorant binding protein, PBP/GOBP // 1.6E-21
1139	142338_at	0.45916	1.17425	5.73326	2.49769e-06	2.81971e-05	4.51386	FBgn0004368	CG6899	Ptp4E	Protein tyrosine phosphatase 4E	31425	4725 // protein tyrosine phosphatase activity // non-traceable author statement /// 5001 // transmembrane receptor protein tyrosine phosphatase activity // inferred from sequence or structural similarity /// 4721 // phosphoprotein phosphatase activity // inferred from electronic annotation /// 4725 // protein tyrosine phosphatase activity // inferred from electronic annotation /// 4872 // recepto…	6470 // protein amino acid dephosphorylation // inferred from sequence or structural similarity /// 6470 // protein amino acid dephosphorylation // non-traceable author statement /// 6470 // protein amino acid dephosphorylation // inferred from electronic annotation /// 6470 // protein amino acid dephosphorylation // inferred from sequence similarity	5886 // plasma membrane // inferred from sequence or structural similarity /// 5886 // plasma membrane // inferred from sequence similarity	IPR003961 // Fibronectin, type III // 1.7E-12 /// IPR003961 // Fibronectin, type III // 2.3E-17 /// IPR003961 // Fibronectin, type III // 1.6E-10 /// IPR003961 // Fibronectin, type III // 3.0E-7 /// IPR003961 // Fibronectin, type III // 1.8E-12 /// IPR003961 // Fibronectin, type III // 2.5E-13 /// IPR003961 // Fibronectin, type III // 2.9E-6 /// IPR003961 // Fibronectin, type III // 7.6E-16 /// I…
9183	150382_at	0.432894	2.16575	5.73284	2.50073e-06	2.82088e-05	4.51266	FBgn0038993	CG13843	CG13843	CG13843	42668	5515 // protein binding // inferred from physical interaction	---	---	---
9367	150566_at	0.571487	1.37082	5.73253	2.50297e-06	2.82113e-05	4.51178	FBgn0039299	CG11854	CG11854	CG11854	43037	---	---	---	IPR004272 // Odorant binding protein // 2.9E-58
1763	142962_at	0.338548	0.0394885	5.73092	2.51458e-06	2.82966e-05	4.50722	FBgn0036040	CG6749	CG6749	CG6749	39144	4872 // receptor activity // inferred from electronic annotation /// 4930 // G-protein coupled receptor activity // inferred from electronic annotation /// 5515 // protein binding // inferred from physical interaction	6952 // defense response // inferred from electronic annotation /// 7155 // cell adhesion // inferred from electronic annotation /// 7165 // signal transduction // inferred from electronic annotation /// 7166 // cell surface receptor linked signal transduction // inferred from electronic annotation /// 7186 // G-protein coupled receptor protein signaling pathway // inferred from electronic annota…	---	IPR001611 // Leucine-rich repeat // 0.27 /// IPR001611 // Leucine-rich repeat // 0.01 /// IPR001611 // Leucine-rich repeat // 0.0055 /// IPR001611 // Leucine-rich repeat // 0.04 /// IPR001611 // Leucine-rich repeat // 0.081 /// IPR001611 // Leucine-rich repeat // 0.022 /// IPR001611 // Leucine-rich repeat // 0.036 /// IPR001611 // Leucine-rich repeat // 0.2 /// IPR001611 // Leucine-rich repeat //…
9790	150989_at	0.622627	2.40147	5.72978	2.52283e-06	2.83576e-05	4.50399	FBgn0039923	CG1793	MED26	Mediator complex subunit 26	43816	3700 // transcription factor activity // inferred from sequence or structural similarity /// 3774 // motor activity // inferred from electronic annotation /// 5198 // structural molecule activity // inferred from electronic annotation /// 16455 // RNA polymerase II transcription mediator activity // inferred from sequence or structural similarity /// 3700 // transcription factor activity // infer…	1539 // ciliary or flagellar motility // inferred from electronic annotation /// 6367 // transcription initiation from RNA polymerase II promoter // inferred from sequence or structural similarity /// 6367 // transcription initiation from RNA polymerase II promoter // inferred from sequence similarity	119 // mediator complex // inferred from sequence or structural similarity /// 9288 // flagellum (sensu Bacteria) // inferred from electronic annotation /// 119 // mediator complex // inferred from sequence similarity	---
265	141464_at	0.460162	0.891508	5.72417	2.5639e-06	2.86522e-05	4.48807	FBgn0003048	CG3443	pcx	pecanex	31204	---	7398 // ectoderm development // inferred from electronic annotation /// 7399 // nervous system development // inferred from electronic annotation /// 7275 // development // inferred from electronic annotation /// 30154 // cell differentiation // inferred from electronic annotation	5886 // plasma membrane // non-traceable author statement /// 5887 // integral to plasma membrane // non-traceable author statement /// 16020 // membrane // inferred from electronic annotation /// 16021 // integral to membrane // inferred from electronic annotation	IPR007735 // Pecanex // 1.0E-126
762	141961_at	0.552974	0.446303	5.72408	2.56459e-06	2.86522e-05	4.48781	---	---	---	---	---	---	---	---	---
1953	143152_at	0.431517	0.6037	5.72475	2.55969e-06	2.86522e-05	4.4897	FBgn0000594	CG17148	Est-P	Esterase P	39393	4091 // carboxylesterase activity // inferred from sequence or structural similarity /// 4091 // carboxylesterase activity // non-traceable author statement /// 5102 // receptor binding // inferred from electronic annotation /// 3824 // catalytic activity // inferred from electronic annotation /// 4091 // carboxylesterase activity // inferred from sequence similarity	7165 // signal transduction // inferred from electronic annotation /// 7274 // neuromuscular synaptic transmission // inferred from electronic annotation	---	IPR002018 // Carboxylesterase, type B // 1.0E-126
2110	143309_at	0.33754	0.409771	5.72195	2.58038e-06	2.87599e-05	4.48176	FBgn0003130	CG8246	Poxn	Pox neuro	36741	3700 // transcription factor activity // inferred from sequence or structural similarity /// 30528 // transcription regulator activity // non-traceable author statement /// 5515 // protein binding // inferred from physical interaction /// 3677 // DNA binding // inferred from electronic annotation /// 3700 // transcription factor activity // inferred from sequence similarity	6355 // regulation of transcription, DNA-dependent // inferred from sequence or structural similarity /// 6355 // regulation of transcription, DNA-dependent // non-traceable author statement /// 6357 // regulation of transcription from RNA polymerase II promoter // inferred from electronic annotation /// 7398 // ectoderm development // inferred from electronic annotation /// 7399 // nervous syste…	5634 // nucleus // inferred from sequence or structural similarity /// 5634 // nucleus // non-traceable author statement /// 5634 // nucleus // inferred from electronic annotation /// 5634 // nucleus // inferred from sequence similarity	IPR001523 // Paired box protein, N-terminal // 2.3E-72
4715	145914_at	0.329648	0.211056	5.72134	2.58494e-06	2.87649e-05	4.48002	FBgn0031838	CG11053	CG11053	CG11053	33926	4656 // procollagen-proline 4-dioxygenase activity // inferred from sequence or structural similarity /// 4656 // procollagen-proline 4-dioxygenase activity // inferred from sequence similarity	18401 // peptidyl-proline hydroxylation to 4-hydroxy-L-proline // inferred from sequence or structural similarity /// 18401 // peptidyl-proline hydroxylation to 4-hydroxy-L-proline // inferred from sequence similarity	16222 // procollagen-proline, 2-oxoglutarate-4-dioxygenase complex // Unknown /// 16222 // procollagen-proline, 2-oxoglutarate-4-dioxygenase complex // inferred from curator	---
2392	143591_at	0.321865	0.593186	5.71948	2.59877e-06	2.8875e-05	4.47476	FBgn0010287	CG7562	Trf	TBP-related factor	34102	3677 // DNA binding // inferred from direct assay /// 3677 // DNA binding // traceable author statement /// 3702 // RNA polymerase II transcription factor activity // inferred from direct assay /// 3704 // specific RNA polymerase II transcription factor activity // inferred from expression pattern /// 3709 // RNA polymerase III transcription factor activity // inferred from direct assay /// 3709 …	6357 // regulation of transcription from RNA polymerase II promoter // traceable author statement /// 6359 // regulation of transcription from RNA polymerase III promoter // inferred from direct assay /// 6359 // regulation of transcription from RNA polymerase III promoter // traceable author statement /// 6367 // transcription initiation from RNA polymerase II promoter // inferred from direct as…	5667 // transcription factor complex // inferred from physical interaction /// 5669 // transcription factor TFIID complex // inferred from direct assay /// 5669 // transcription factor TFIID complex // inferred from sequence or structural similarity /// 5700 // polytene chromosome // inferred from direct assay /// 5634 // nucleus // inferred from electronic annotation /// 5669 // transcription fa…	IPR000814 // Transcription factor TFIID // 2.5E-43 /// IPR000814 // Transcription factor TFIID // 4.2E-42
13599	154798_at	0.368859	1.14298	5.71918	2.60101e-06	2.8875e-05	4.47391	FBgn0042111	CG18766	CG18766	CG18766	59150	5515 // protein binding // inferred from physical interaction /// 42802 // identical protein binding // inferred from physical interaction	---	---	---
8377	149576_at	0.509014	1.10033	5.71812	2.609e-06	2.89407e-05	4.47089	FBgn0037737	CG8383	Pnn	Pinin	41185	5515 // protein binding // inferred from physical interaction	6396 // RNA processing // non-traceable author statement /// 7160 // cell-matrix adhesion // inferred from electronic annotation /// 7165 // signal transduction // inferred from electronic annotation	30057 // desmosome // inferred from sequence or structural similarity /// 30057 // desmosome // inferred from sequence similarity	IPR006786 // Pinin/SDK/memA protein // 2.0E-101
887	142086_at	0.42389	0.823547	5.71724	2.6156e-06	2.89681e-05	4.4684	FBgn0040754	CG17059	CG17059	CG17059	50227	---	---	---	---
6300	147499_at	0.298657	0.172946	5.7116	2.6585e-06	2.93503e-05	4.45237	FBgn0034446	CG7735	CG7735	CG7735	37236	3924 // GTPase activity // inferred from sequence or structural similarity /// 5525 // GTP binding // inferred from electronic annotation /// 3924 // GTPase activity // inferred from sequence similarity	6886 // intracellular protein transport // inferred from electronic annotation /// 7186 // G-protein coupled receptor protein signaling pathway // inferred from electronic annotation /// 7264 // small GTPase mediated signal transduction // inferred from electronic annotation /// 16192 // vesicle-mediated transport // inferred from electronic annotation	---	IPR006689 // ARF/SAR superfamily // 3.0E-38 /// IPR006689 // ARF/SAR superfamily // 6.8E-21
13742	154941_at	0.418038	1.9251	5.70864	2.6812e-06	2.95544e-05	4.44398	FBgn0032876	CG1962	CG1962	CG1962	35330	---	---	---	---
10561	151760_at	0.676522	2.52839	5.70627	2.69962e-06	2.97107e-05	4.43724	FBgn0033913	CG8468	CG8468	CG8468	36577	15355 // monocarboxylate porter activity // non-traceable author statement	6812 // cation transport // inferred from electronic annotation	---	---
8810	150009_at	0.39577	3.68977	5.70582	2.70308e-06	2.97254e-05	4.43597	FBgn0038421	CG17931	CG17931	CG17931	41985	---	---	---	IPR007513 // Four F5 protein // 2.4E-30 /// IPR007513 // Four F5 protein // 7.0E-27
13014	154213_at	0.375822	0.64674	5.70542	2.70623e-06	2.97367e-05	4.43483	FBgn0015371	CG11798	chn	charlatan	36678	3700 // transcription factor activity // inferred from sequence or structural similarity /// 3700 // transcription factor activity // non-traceable author statement /// 3705 // RNA polymerase II transcription factor activity, enhancer binding // inferred from direct assay /// 8270 // zinc ion binding // inferred from electronic annotation /// 3676 // nucleic acid binding // inferred from electron…	122 // negative regulation of transcription from RNA polymerase II promoter // non-traceable author statement /// 1700 // embryonic development (sensu Insecta) // inferred from mutant phenotype /// 7399 // nervous system development // non-traceable author statement /// 7422 // peripheral nervous system development // inferred from mutant phenotype /// 7423 // sensory organ development // inferre…	5634 // nucleus // Unknown /// 5634 // nucleus // inferred from electronic annotation /// 5634 // nucleus // inferred from curator	---
448	141647_at	0.547892	3.49628	5.70499	2.70955e-06	2.97469e-05	4.43362	FBgn0035436	CG12016	CG12016	CG12016	38411	5515 // protein binding // inferred from physical interaction	---	---	---
11482	152681_at	0.549643	2.11403	5.70448	2.71353e-06	2.97469e-05	4.43217	FBgn0033624	CG12384	CG12384	CG12384	36224	8047 // enzyme activator activity // inferred from electronic annotation /// 30234 // enzyme regulator activity // inferred from electronic annotation	6915 // apoptosis // inferred from electronic annotation /// 6917 // induction of apoptosis // inferred from electronic annotation /// 7165 // signal transduction // inferred from electronic annotation /// 7166 // cell surface receptor linked signal transduction // inferred from electronic annotation /// 7242 // intracellular signaling cascade // inferred from electronic annotation /// 7249 // I-…	---	---
3981	145180_at	0.300682	-0.0649788	5.70236	2.73014e-06	2.98823e-05	4.42616	FBgn0030739	CG13957	CG13957	CG13957	32594	---	---	---	---
12144	153343_at	0.828404	1.175	5.70136	2.73805e-06	2.99454e-05	4.42331	FBgn0039509	CG3350	bigmax	bigmax	43293	3700 // transcription factor activity // inferred from sequence or structural similarity /// 3700 // transcription factor activity // non-traceable author statement /// 5515 // protein binding // inferred from physical interaction /// 30528 // transcription regulator activity // inferred from electronic annotation /// 3700 // transcription factor activity // inferred from sequence similarity	6350 // transcription // non-traceable author statement /// 6357 // regulation of transcription from RNA polymerase II promoter // inferred from electronic annotation /// 35071 // salivary gland cell autophagic cell death // inferred from expression pattern /// 45449 // regulation of transcription // inferred from sequence or structural similarity /// 48102 // autophagic cell death // inferred fr…	5634 // nucleus // inferred from sequence or structural similarity /// 5634 // nucleus // non-traceable author statement /// 5634 // nucleus // inferred from electronic annotation /// 5634 // nucleus // inferred from sequence similarity	IPR001092 // Basic helix-loop-helix dimerization domain bHLH // 2.3E-17
9368	150567_at	0.41889	5.34903	5.69675	2.7747e-06	3.02915e-05	4.4102	FBgn0039300	CG10423	RpS27	Ribosomal protein S27	43039	3676 // nucleic acid binding // inferred from electronic annotation /// 3735 // structural constituent of ribosome // inferred from sequence or structural similarity /// 3735 // structural constituent of ribosome // inferred from electronic annotation /// 8270 // zinc ion binding // inferred from electronic annotation /// 46872 // metal ion binding // inferred from electronic annotation /// 3735 …	6412 // protein biosynthesis // inferred from electronic annotation	5840 // ribosome // inferred from electronic annotation /// 5843 // cytosolic small ribosomal subunit (sensu Eukaryota) // inferred from sequence or structural similarity /// 5622 // intracellular // inferred from electronic annotation /// 30529 // ribonucleoprotein complex // inferred from electronic annotation /// 5843 // cytosolic small ribosomal subunit (sensu Eukaryota) // inferred from sequ…	IPR000592 // Ribosomal protein S27E // 2.1E-33
2337	143536_at	0.727788	2.76485	5.69452	2.79252e-06	3.03752e-05	4.40389	FBgn0004915	CG5193	TfIIB	Transcription factor IIB	34430	8134 // transcription factor binding // inferred from physical interaction /// 16251 // general RNA polymerase II transcription factor activity // inferred from sequence or structural similarity /// 5515 // protein binding // inferred from physical interaction /// 3702 // RNA polymerase II transcription factor activity // inferred from electronic annotation /// 8270 // zinc ion binding // inferre…	6357 // regulation of transcription from RNA polymerase II promoter // non-traceable author statement /// 6367 // transcription initiation from RNA polymerase II promoter // inferred from sequence or structural similarity /// 51101 // regulation of DNA binding // inferred from direct assay /// 6350 // transcription // inferred from electronic annotation /// 6352 // transcription initiation // inf…	5634 // nucleus // non-traceable author statement /// 5667 // transcription factor complex // inferred from sequence or structural similarity /// 5634 // nucleus // inferred from electronic annotation /// 5667 // transcription factor complex // inferred from electronic annotation /// 5667 // transcription factor complex // inferred from sequence similarity	IPR000812 // Transcription factor TFIIB // 8.6E-36 /// IPR000812 // Transcription factor TFIIB // 1.8E-37
8214	149413_at	0.280731	0.110246	5.69518	2.78723e-06	3.03752e-05	4.40576	FBgn0037459	CG15184	CG15184	CG15184	40808	---	---	---	---
11902	153101_at	0.506904	1.19407	5.69502	2.78856e-06	3.03752e-05	4.40529	FBgn0034648	CG15675	CG15675	CG15675	37469	---	---	---	---
7923	149122_at	0.331435	0.527106	5.69375	2.79874e-06	3.04192e-05	4.4017	FBgn0053969	---	CG33969	CG33969	40252	---	---	---	---
13330	154529_at	0.523435	2.90041	5.69056	2.82459e-06	3.06052e-05	4.39264	FBgn0035630	CG10576	CG10576	CG10576	38645	3676 // nucleic acid binding // inferred from electronic annotation /// 4239 // methionyl aminopeptidase activity // inferred from sequence or structural similarity /// 30528 // transcription regulator activity // inferred from electronic annotation /// 8235 // metalloexopeptidase activity // inferred from electronic annotation /// 4239 // methionyl aminopeptidase activity // inferred from sequen…	6412 // protein biosynthesis // inferred from electronic annotation /// 6464 // protein modification // inferred from electronic annotation /// 6508 // proteolysis // inferred from electronic annotation	---	IPR000994 // Peptidase M24 // 9.2E-9 /// IPR000994 // Peptidase M24 // 1.5E-10
6397	147596_at	0.294904	0.724825	5.6874	2.85043e-06	3.08137e-05	4.38367	FBgn0034578	CG15653	CG15653	CG15653	37388	---	---	---	---
7329	148528_at	0.39524	2.27112	5.686	2.86195e-06	3.08905e-05	4.37969	FBgn0036093	CG14154	CG14154	CG14154	39207	---	---	---	---
9537	150736_at	0.346058	-0.152326	5.68563	2.86498e-06	3.08994e-05	4.37865	FBgn0039523	CG12885	CG12885	CG12885	43308	---	---	---	---
3728	144927_s_at	0.450393	1.02282	5.68464	2.8732e-06	3.09167e-05	4.37583	---	---	---	---	---	---	---	---	---
5070	146269_at	0.286543	0.0291323	5.68407	2.87793e-06	3.09438e-05	4.3742	FBgn0032405	---	CG14946	CG14946	34627	16491 // oxidoreductase activity // inferred from sequence or structural similarity /// 16491 // oxidoreductase activity // inferred from electronic annotation /// 16491 // oxidoreductase activity // inferred from sequence similarity	7601 // visual perception // inferred from electronic annotation /// 8152 // metabolism // inferred from electronic annotation	---	---
13700	154899_at	0.51762	1.09702	5.67829	2.92626e-06	3.13672e-05	4.35779	FBgn0031759	CG9088	lid	little imaginal discs	33837	3677 // DNA binding // inferred from electronic annotation /// 30528 // transcription regulator activity // inferred from electronic annotation /// 5515 // protein binding // inferred from electronic annotation /// 8270 // zinc ion binding // inferred from electronic annotation	6355 // regulation of transcription, DNA-dependent // inferred from electronic annotation /// 7275 // development // inferred from electronic annotation	5622 // intracellular // inferred from electronic annotation /// 5634 // nucleus // inferred from electronic annotation	IPR001606 // ARID (AT-rich interaction domain) protein // 2.7E-38 /// IPR003347 // Transcription factor jumonji, jmjC // 8.8E-60 /// IPR001965 // Zn-finger-like, PHD finger // 5.7E-23 /// IPR001965 // Zn-finger-like, PHD finger // 3.6E-12 /// IPR001965 // Zn-finger-like, PHD finger // 2.5E-13 /// IPR003349 // Transcription factor jumonji, JmjN // 3.2E-23 /// IPR004198 // Zn-finger, C5HC2 type // …
877	142076_at	0.581125	1.24322	5.67508	2.95348e-06	3.15383e-05	4.34867	---	---	---	---	---	---	---	---	---
245	141444_at	0.770583	1.85719	5.67259	2.97475e-06	3.17412e-05	4.3416	FBgn0030357	CG2471	CG2471	CG2471	32156	---	---	---	IPR001611 // Leucine-rich repeat // 6.9E-4 /// IPR001611 // Leucine-rich repeat // 0.094
10842	152041_at	0.448076	0.360189	5.6719	2.98067e-06	3.17678e-05	4.33964	FBgn0015799	CG7413	Rbf	Retinoblastoma-family protein	31027	3677 // DNA binding // non-traceable author statement /// 8134 // transcription factor binding // inferred from physical interaction /// 30528 // transcription regulator activity // inferred from electronic annotation /// 5515 // protein binding // inferred from physical interaction /// 3677 // DNA binding // inferred from electronic annotation	74 // regulation of progression through cell cycle // inferred from mutant phenotype /// 74 // regulation of progression through cell cycle // inferred from sequence or structural similarity /// 80 // G1 phase of mitotic cell cycle // inferred from mutant phenotype /// 122 // negative regulation of transcription from RNA polymerase II promoter // inferred from direct assay /// 122 // negative reg…	785 // chromatin // inferred from direct assay /// 5634 // nucleus // non-traceable author statement /// 31523 // Myb complex // inferred from direct assay /// 35189 // Rb-E2F complex // inferred from direct assay /// 35189 // Rb-E2F complex // traceable author statement /// 5634 // nucleus // inferred from electronic annotation	IPR002720 // Retinoblastoma-associated protein, A-box // 1.9E-106 /// IPR002719 // Retinoblastoma-associated protein, B-box // 6.8E-84
9103	150302_at	0.414111	0.800735	5.66729	3.02053e-06	3.21075e-05	4.32655	FBgn0038866	CG5810	CG5810	CG5810	42513	4672 // protein kinase activity // inferred from electronic annotation /// 4675 // transmembrane receptor protein serine/threonine kinase activity // inferred from electronic annotation /// 4872 // receptor activity // inferred from electronic annotation /// 16301 // kinase activity // inferred from electronic annotation /// 19199 // transmembrane receptor protein kinase activity // inferred from…	6952 // defense response // inferred from electronic annotation /// 7155 // cell adhesion // inferred from electronic annotation /// 7165 // signal transduction // inferred from electronic annotation /// 7166 // cell surface receptor linked signal transduction // inferred from electronic annotation /// 7275 // development // inferred from electronic annotation /// 9950 // dorsal/ventral axis spec…	---	IPR001611 // Leucine-rich repeat // 0.22 /// IPR001611 // Leucine-rich repeat // 5.1E-5 /// IPR001611 // Leucine-rich repeat // 0.0037 /// IPR001611 // Leucine-rich repeat // 0.22
3081	144280_at	0.438398	1.31379	5.66486	3.04173e-06	3.23083e-05	4.31966	FBgn0028872	CG18095	CG18095	CG18095	34823	---	7155 // cell adhesion // inferred from electronic annotation /// 19226 // transmission of nerve impulse // inferred from electronic annotation	---	IPR001611 // Leucine-rich repeat // 0.26 /// IPR001611 // Leucine-rich repeat // 0.0070 /// IPR001611 // Leucine-rich repeat // 0.012 /// IPR001611 // Leucine-rich repeat // 4.8E-5 /// IPR001611 // Leucine-rich repeat // 5.4E-4 /// IPR001611 // Leucine-rich repeat // 0.056 /// IPR001611 // Leucine-rich repeat // 0.058 /// IPR001611 // Leucine-rich repeat // 0.0011 /// IPR001611 // Leucine-rich re…
4555	145754_at	0.388635	1.02105	5.66188	3.06795e-06	3.25213e-05	4.3112	FBgn0031596	CG15429	CG15429	CG15429	33637	5506 // iron ion binding // inferred from electronic annotation /// 46872 // metal ion binding // inferred from electronic annotation	---	---	IPR001199 // Cytochrome b5 // 8.4E-18
9524	150723_at	0.54876	0.629137	5.65822	3.10048e-06	3.2808e-05	4.30081	FBgn0039507	CG3361	mrt	martik	43291	---	7611 // learning and/or memory // inferred from mutant phenotype /// 8355 // olfactory learning // inferred from mutant phenotype	---	---
1730	142929_at	0.423383	0.401927	5.65687	3.11258e-06	3.28864e-05	4.29697	FBgn0038798	CG17916	Or92a	Odorant receptor 92a	42425	4984 // olfactory receptor activity // inferred from sequence or structural similarity /// 5549 // odorant binding // inferred from electronic annotation /// 4984 // olfactory receptor activity // inferred from sequence similarity	7608 // sensory perception of smell // inferred from sequence or structural similarity /// 7608 // sensory perception of smell // inferred from sequence similarity	16021 // integral to membrane // inferred from sequence or structural similarity /// 16021 // integral to membrane // inferred from sequence similarity	IPR004117 // Olfactory receptor, Drosophila // 9.6E-75
10870	152069_at	0.331667	1.40187	5.65698	3.11159e-06	3.28864e-05	4.29729	FBgn0005410	CG1903	sno	strawberry notch	32273	3676 // nucleic acid binding // inferred from electronic annotation /// 4386 // helicase activity // inferred from electronic annotation /// 5524 // ATP binding // inferred from electronic annotation	7173 // epidermal growth factor receptor signaling pathway // traceable author statement /// 7219 // Notch signaling pathway // inferred from genetic interaction /// 7219 // Notch signaling pathway // traceable author statement /// 7466 // cone cell fate commitment (sensu Endopterygota) // traceable author statement /// 7560 // imaginal disc morphogenesis // non-traceable author statement /// 858…	5634 // nucleus // inferred from direct assay /// 5634 // nucleus // traceable author statement	---
12472	153671_at	0.463556	1.35789	5.64743	3.19849e-06	3.36671e-05	4.27015	FBgn0026257	CG6219	cav	caravaggio	42881	3696 // satellite DNA binding // non-traceable author statement	16233 // telomere capping // inferred from expression pattern	775 // chromosome, pericentric region // inferred from direct assay /// 781 // chromosome, telomeric region // inferred from direct assay /// 784 // nuclear chromosome, telomeric region // inferred from direct assay /// 5634 // nucleus // inferred from direct assay	---
6192	147391_at	0.324207	0.585909	5.64663	3.20579e-06	3.36715e-05	4.2679	FBgn0034262	CG14485	swi2	swi2	37010	---	7242 // intracellular signaling cascade // inferred from sequence or structural similarity /// 35073 // pupariation // inferred from sequence or structural similarity /// 35075 // response to ecdysone // inferred from sequence or structural similarity /// 7242 // intracellular signaling cascade // inferred from sequence similarity /// 35073 // pupariation // inferred from sequence similarity /// …	---	IPR001611 // Leucine-rich repeat // 0.68 /// IPR001611 // Leucine-rich repeat // 0.5 /// IPR001611 // Leucine-rich repeat // 0.25 /// IPR003903 // Ubiquitin interacting motif // 0.018
8396	149595_at	0.453563	2.71067	5.64711	3.20139e-06	3.36715e-05	4.26926	FBgn0037765	CG9458	CG9458	CG9458	41214	8415 // acyltransferase activity // inferred from electronic annotation /// 16740 // transferase activity // inferred from electronic annotation /// 5515 // protein binding // inferred from physical interaction	6629 // lipid metabolism // inferred from electronic annotation /// 6631 // fatty acid metabolism // inferred from electronic annotation	16021 // integral to membrane // inferred from electronic annotation	---
10240	151439_at	0.489978	-0.241847	5.64634	3.20853e-06	3.36715e-05	4.26706	FBgn0040977	CG15292	CG15292	CG15292	50451	---	---	---	---
13806	155005_at	0.309865	1.68956	5.64657	3.20635e-06	3.36715e-05	4.26773	FBgn0030269	CG18292	CG18292	CG18292	32050	19207 // kinase regulator activity // inferred from electronic annotation /// 19210 // kinase inhibitor activity // inferred from electronic annotation	8283 // cell proliferation // inferred from electronic annotation	---	---
81	141280_at	0.393337	1.30664	5.64585	3.21305e-06	3.36937e-05	4.26567	FBgn0032681	CG10283	CG10283	CG10283	35102	---	---	---	---
4626	145825_at	0.440095	1.08367	5.6444	3.22647e-06	3.37586e-05	4.26157	FBgn0031710	CG7371	CG7371	CG7371	33774	---	---	---	IPR007258 // Vps52/Sac2 // 1.0E-126
882	142081_at	0.429272	0.544428	5.6414	3.25455e-06	3.39769e-05	4.25303	---	---	---	---	---	---	---	---	---
13253	154452_at	0.57955	3.08502	5.64075	3.26061e-06	3.40142e-05	4.2512	FBgn0040236	CG12132	c11.1	c11.1	53436	5515 // protein binding // inferred from physical interaction /// 5488 // binding // inferred from electronic annotation	---	---	---
2054	143253_at	0.303937	0.0938	5.64033	3.26458e-06	3.40303e-05	4.25	FBgn0002632 /// FBgn0082719 /// FBgn0082692	CG8354	m6 /// Dsimm6 /// Dyakm6	E(spl) region transcript m6 /// m6 /// m6	43159	---	---	---	---
8185	149384_at	0.359798	-0.241774	5.63333	3.33114e-06	3.45698e-05	4.23011	FBgn0037418	CG15596	Osi11	Osiris 11	40765	---	---	---	---
5061	146260_at	0.488553	1.77403	5.62858	3.37705e-06	3.48655e-05	4.21663	FBgn0032385	CG16964	CG16964	CG16964	34605	---	---	---	---
3269	144468_at	0.334755	-0.161058	5.62396	3.42235e-06	3.52812e-05	4.2035	FBgn0041252	CG15573	Femcoat	Femcoat	31367	5213 // structural constituent of chorion (sensu Insecta) // non-traceable author statement	7306 // insect chorion formation // inferred from mutant phenotype	5737 // cytoplasm // inferred from direct assay	---
4660	145859_at	0.473024	0.151082	5.62289	3.43298e-06	3.53388e-05	4.20045	FBgn0031756	CG13992	CG13992	CG13992	33831	---	---	---	---
2894	144093_at	0.370892	1.18728	5.61798	3.48186e-06	3.57369e-05	4.18652	FBgn0025781	CG6759	cdc16	cdc16	42753	4842 // ubiquitin-protein ligase activity // inferred from sequence or structural similarity /// 5488 // binding // inferred from electronic annotation /// 4842 // ubiquitin-protein ligase activity // inferred from sequence similarity	74 // regulation of progression through cell cycle // inferred from electronic annotation /// 90 // mitotic anaphase // non-traceable author statement /// 6512 // ubiquitin cycle // inferred from sequence or structural similarity /// 7049 // cell cycle // inferred from mutant phenotype /// 6512 // ubiquitin cycle // inferred from sequence similarity	5680 // anaphase-promoting complex // inferred from sequence or structural similarity /// 5680 // anaphase-promoting complex // non-traceable author statement /// 5680 // anaphase-promoting complex // inferred from sequence similarity	IPR001440 // TPR repeat // 0.023 /// IPR001440 // TPR repeat // 0.33 /// IPR001440 // TPR repeat // 8.5E-5 /// IPR001440 // TPR repeat // 4.7E-7
10872	152071_at	0.322009	0.363788	5.61804	3.4813e-06	3.57369e-05	4.18668	FBgn0039905	CG2052	CG2052	CG2052	43789	3676 // nucleic acid binding // inferred from electronic annotation /// 8270 // zinc ion binding // inferred from electronic annotation /// 30528 // transcription regulator activity // inferred from electronic annotation /// 46872 // metal ion binding // inferred from electronic annotation	6139 // nucleobase, nucleoside, nucleotide and nucleic acid metabolism // inferred from electronic annotation /// 6357 // regulation of transcription from RNA polymerase II promoter // inferred from electronic annotation /// 6366 // transcription from RNA polymerase II promoter // inferred from electronic annotation /// 8283 // cell proliferation // inferred from electronic annotation	5634 // nucleus // inferred from electronic annotation	IPR007087 // Zn-finger, C2H2 type // 2.1E-4 /// IPR007087 // Zn-finger, C2H2 type // 3.2E-5 /// IPR007087 // Zn-finger, C2H2 type // 7.9E-7 /// IPR007087 // Zn-finger, C2H2 type // 3.7E-5
3235	144434_at	0.342664	-0.399066	5.6152	3.50986e-06	3.59715e-05	4.17863	FBgn0000479	CG32498	dnc	dunce	31309	4114 // 3',5'-cyclic-nucleotide phosphodiesterase activity // non-traceable author statement /// 4115 // 3',5'-cyclic-AMP phosphodiesterase activity // inferred from sequence or structural similarity /// 4115 // 3',5'-cyclic-AMP phosphodiesterase activity // traceable author statement /// 4114 // 3',5'-cyclic-nucleotide phosphodiesterase activity // inferred from electronic annotation /// 16787 /…	3 // reproduction // non-traceable author statement /// 7268 // synaptic transmission // inferred from mutant phenotype /// 7610 // behavior // traceable author statement /// 7611 // learning and/or memory // non-traceable author statement /// 7611 // learning and/or memory // traceable author statement /// 7612 // learning // non-traceable author statement /// 7613 // memory // traceable author …	---	IPR002073 // 35-cyclic nucleotide phosphodiesterase // 1.0E-126 /// IPR002073 // 35-cyclic nucleotide phosphodiesterase // 1.0E-126
10207	151406_at	0.385758	-0.0341113	5.61032	3.55963e-06	3.63752e-05	4.16476	FBgn0052685	CG32685	CG32685	CG32685	31942	---	---	---	---
1830	143029_at	0.456402	0.683052	5.6058	3.6064e-06	3.67363e-05	4.1519	FBgn0035312	CG15820	CG15820	CG15820	38277	16787 // hydrolase activity // inferred from electronic annotation /// 3824 // catalytic activity // inferred from electronic annotation	---	---	IPR000073 // Alpha/beta hydrolase fold // 8.2E-18
9963	151162_at	0.387901	-0.477871	5.60591	3.60518e-06	3.67363e-05	4.15224	FBgn0040685	CG12587	CG12587	CG12587	50158	---	---	---	---
11000	152199_at	0.308847	1.13253	5.60563	3.60807e-06	3.67363e-05	4.15145	FBgn0015269	CG8318	Nf1	Neurofibromin 1	43149	5099 // Ras GTPase activator activity // inferred from sequence or structural similarity /// 5099 // Ras GTPase activator activity // traceable author statement /// 5102 // receptor binding // inferred from electronic annotation /// 5099 // Ras GTPase activator activity // inferred from sequence similarity	7611 // learning and/or memory // non-traceable author statement /// 7612 // learning // traceable author statement /// 7614 // short-term memory // traceable author statement /// 7622 // rhythmic behavior // non-traceable author statement /// 8355 // olfactory learning // traceable author statement /// 16049 // cell growth // non-traceable author statement /// 19933 // cAMP-mediated signaling //…	---	IPR001936 // Ras GTPase-activating protein // 1.6E-74
12481	153680_at	0.409909	0.376834	5.60345	3.63084e-06	3.68609e-05	4.14525	FBgn0025807	CG3945	Rad9	Rad9	40054	19209 // kinase activator activity // inferred from electronic annotation	74 // regulation of progression through cell cycle // inferred from electronic annotation /// 6281 // DNA repair // non-traceable author statement /// 6281 // DNA repair // inferred from electronic annotation	---	IPR007268 // Rad9 // 2.2E-13 /// IPR007268 // Rad9 // 3.1E-8
2080	143279_at	0.349586	1.52857	5.60207	3.64533e-06	3.69813e-05	4.14133	FBgn0011774	CG5247	Irbp	Inverted repeat-binding protein	117419	3677 // DNA binding // inferred from direct assay /// 3677 // DNA binding // inferred from sequence or structural similarity /// 3677 // DNA binding // non-traceable author statement /// 4003 // ATP-dependent DNA helicase activity // non-traceable author statement /// 4677 // DNA-dependent protein kinase activity // inferred from direct assay /// 4677 // DNA-dependent protein kinase activity // i…	723 // telomere maintenance // inferred from mutant phenotype /// 6260 // DNA replication // inferred from electronic annotation /// 6303 // double-strand break repair via nonhomologous end joining // inferred from electronic annotation /// 6310 // DNA recombination // inferred from electronic annotation	5634 // nucleus // non-traceable author statement /// 5634 // nucleus // inferred from electronic annotation /// 5958 // DNA-dependent protein kinase complex // inferred from electronic annotation	IPR006164 // Ku // 3.4E-75 /// IPR005161 // Ku70/Ku80 N-terminal alpha/beta domain // 3.9E-72 /// IPR005160 // Ku70/Ku80 C-terminal arm // 4.8E-24
11797	152996_at	0.406613	2.18349	5.59684	3.70077e-06	3.75165e-05	4.12646	---	---	---	---	---	---	---	---	---
625	141824_at	0.411355	0.215271	5.59156	3.75757e-06	3.80334e-05	4.11146	---	---	---	---	---	---	---	---	---
2301	143500_at	0.56313	1.93138	5.5905	3.769e-06	3.80979e-05	4.10847	FBgn0004635	CG1004	rho	rhomboid	38168	5057 // receptor signaling protein activity // inferred from electronic annotation /// 5102 // receptor binding // inferred from electronic annotation /// 8236 // serine-type peptidase activity // inferred from direct assay /// 8236 // serine-type peptidase activity // inferred from genetic interaction /// 8236 // serine-type peptidase activity // inferred from mutant phenotype /// 8236 // serine…	910 // cytokinesis // inferred from mutant phenotype /// 1763 // morphogenesis of a branching structure // non-traceable author statement /// 7173 // epidermal growth factor receptor signaling pathway // traceable author statement /// 7174 // epidermal growth factor ligand processing // inferred from genetic interaction /// 7174 // epidermal growth factor ligand processing // traceable author sta…	5783 // endoplasmic reticulum // inferred from direct assay /// 5794 // Golgi apparatus // inferred from direct assay /// 5794 // Golgi apparatus // traceable author statement /// 5886 // plasma membrane // inferred from direct assay /// 5886 // plasma membrane // inferred from sequence or structural similarity /// 5886 // plasma membrane // traceable author statement /// 5887 // integral to plas…	IPR002610 // Peptidase S54, rhomboid-like protein // 8.0E-51
10507	151706_s_at	0.35619	0.46682	5.58943	3.78069e-06	3.81885e-05	4.10542	FBgn0013263	CG33261	Trl	Trithorax-like	2768981	3677 // DNA binding // non-traceable author statement /// 3702 // RNA polymerase II transcription factor activity // non-traceable author statement /// 3704 // specific RNA polymerase II transcription factor activity // inferred from mutant phenotype /// 3704 // specific RNA polymerase II transcription factor activity // non-traceable author statement /// 5515 // protein binding // inferred from …	280 // nuclear division // inferred from mutant phenotype /// 6325 // establishment and/or maintenance of chromatin architecture // non-traceable author statement /// 6357 // regulation of transcription from RNA polymerase II promoter // non-traceable author statement /// 7549 // dosage compensation // inferred from mutant phenotype /// 35186 // syncytial blastoderm mitotic cell cycle // inferred…	785 // chromatin // non-traceable author statement /// 5634 // nucleus // inferred from direct assay /// 5634 // nucleus // non-traceable author statement /// 5721 // centric heterochromatin // inferred from direct assay /// 5721 // centric heterochromatin // traceable author statement /// 791 // euchromatin // inferred from direct assay /// 5700 // polytene chromosome // inferred from direct ass…	IPR000210 // BTB/POZ domain // 6.7E-30
12447	153646_at	0.365811	1.61011	5.58101	3.87367e-06	3.90714e-05	4.08149	FBgn0027620	CG1966	Acf1	ATP-dependent chromatin assembly factor large subunit	43751	3677 // DNA binding // traceable author statement /// 3682 // chromatin binding // inferred from electronic annotation /// 4402 // histone acetyltransferase activity // inferred from direct assay /// 30528 // transcription regulator activity // inferred from electronic annotation /// 5515 // protein binding // inferred from electronic annotation /// 8270 // zinc ion binding // inferred from elect…	6333 // chromatin assembly or disassembly // non-traceable author statement /// 6333 // chromatin assembly or disassembly // traceable author statement /// 6334 // nucleosome assembly // inferred from direct assay /// 6355 // regulation of transcription, DNA-dependent // inferred from direct assay /// 6357 // regulation of transcription from RNA polymerase II promoter // inferred from electronic …	5678 // chromatin assembly complex // non-traceable author statement /// 8623 // chromatin accessibility complex // non-traceable author statement /// 16589 // NURF complex // inferred from physical interaction /// 16590 // ACF complex // inferred from direct assay /// 16590 // ACF complex // inferred from physical interaction /// 16590 // ACF complex // traceable author statement	IPR001965 // Zn-finger-like, PHD finger // 4.6E-20 /// IPR001965 // Zn-finger-like, PHD finger // 0.0010 /// IPR001487 // Bromodomain // 1.1E-26
5671	146870_at	0.297031	-0.361546	5.58015	3.88324e-06	3.91236e-05	4.07906	FBgn0033389	CG2412	Rad51C	Rad51C	35937	150 // recombinase activity // inferred from sequence or structural similarity /// 8094 // DNA-dependent ATPase activity // inferred from sequence or structural similarity /// 150 // recombinase activity // inferred from sequence similarity /// 8094 // DNA-dependent ATPase activity // inferred from sequence similarity	6281 // DNA repair // inferred from sequence or structural similarity /// 6310 // DNA recombination // inferred from sequence or structural similarity /// 6281 // DNA repair // inferred from sequence similarity /// 6310 // DNA recombination // inferred from sequence similarity	---	---
10666	151865_at	0.499824	1.75791	5.57331	3.96069e-06	3.97204e-05	4.05961	FBgn0035855	CG7366	CG7366	CG7366	38918	5515 // protein binding // inferred from physical interaction	---	---	---
8952	150151_at	0.649981	2.99004	5.57252	3.96967e-06	3.97819e-05	4.05738	FBgn0038631	CG7695	CG7695	CG7695	42234	---	---	---	---
5067	146266_at	0.434889	0.452156	5.57172	3.97882e-06	3.98451e-05	4.05512	FBgn0032401	CG6792	CG6792	CG6792	34622	3676 // nucleic acid binding // inferred from electronic annotation /// 5515 // protein binding // inferred from electronic annotation /// 8270 // zinc ion binding // inferred from electronic annotation /// 30528 // transcription regulator activity // inferred from electronic annotation /// 46872 // metal ion binding // inferred from electronic annotation	6139 // nucleobase, nucleoside, nucleotide and nucleic acid metabolism // inferred from electronic annotation /// 6357 // regulation of transcription from RNA polymerase II promoter // inferred from electronic annotation /// 6366 // transcription from RNA polymerase II promoter // inferred from electronic annotation /// 8283 // cell proliferation // inferred from electronic annotation	5634 // nucleus // inferred from electronic annotation	IPR007087 // Zn-finger, C2H2 type // 2.3E-5 /// IPR007087 // Zn-finger, C2H2 type // 1.1E-5
9755	150954_at	0.393387	0.596733	5.56897	4.01056e-06	4.01343e-05	4.04729	FBgn0039868	CG11563	CG11563	CG11563	43735	---	---	---	---
12748	153947_at	0.340884	0.807622	5.56827	4.0186e-06	4.0186e-05	4.04532	FBgn0002673	CG4965	twe	twine	34954	4725 // protein tyrosine phosphatase activity // inferred from sequence or structural similarity /// 4725 // protein tyrosine phosphatase activity // non-traceable author statement /// 8138 // protein tyrosine/serine/threonine phosphatase activity // non-traceable author statement /// 5515 // protein binding // inferred from physical interaction /// 4721 // phosphoprotein phosphatase activity // …	87 // M phase of mitotic cell cycle // inferred from electronic annotation /// 6470 // protein amino acid dephosphorylation // inferred from sequence or structural similarity /// 6470 // protein amino acid dephosphorylation // non-traceable author statement /// 7053 // male meiotic spindle assembly (sensu Metazoa) // inferred from mutant phenotype /// 7056 // female meiotic spindle assembly (sens…	15630 // microtubule cytoskeleton // inferred from electronic annotation /// 5622 // intracellular // inferred from electronic annotation	IPR001763 // Rhodanese-like // 1.2E-31
244	141443_at	0.637497	1.19219	5.56779	4.02417e-06	4.0213e-05	4.04396	FBgn0031717	CG6957	Oscillin	Oscillin	33783	4342 // glucosamine-6-phosphate deaminase activity // inferred from sequence or structural similarity /// 4342 // glucosamine-6-phosphate deaminase activity // inferred from electronic annotation /// 4342 // glucosamine-6-phosphate deaminase activity // inferred from sequence similarity	5996 // monosaccharide metabolism // inferred from electronic annotation /// 6044 // N-acetylglucosamine metabolism // inferred from electronic annotation /// 5975 // carbohydrate metabolism // inferred from electronic annotation	---	IPR006148 // Glucosamine/galactosamine-6-phosphate isomerase // 1.0E-126
727	141926_at	0.303167	-0.325132	5.56679	4.03586e-06	4.0301e-05	4.0411	---	---	---	---	---	---	---	---	---
2024	143223_at	0.673205	2.75413	5.56495	4.05733e-06	4.04578e-05	4.03588	FBgn0001994	CG7664	crp	cropped	34956	3702 // RNA polymerase II transcription factor activity // inferred from sequence or structural similarity /// 3702 // RNA polymerase II transcription factor activity // non-traceable author statement /// 16491 // oxidoreductase activity // inferred from electronic annotation /// 30528 // transcription regulator activity // inferred from electronic annotation /// 3702 // RNA polymerase II transcr…	7275 // development // inferred from electronic annotation /// 30154 // cell differentiation // inferred from electronic annotation /// 45449 // regulation of transcription // inferred from electronic annotation	5634 // nucleus // inferred from sequence or structural similarity /// 5634 // nucleus // inferred from electronic annotation /// 5634 // nucleus // inferred from sequence similarity	IPR001092 // Basic helix-loop-helix dimerization domain bHLH // 3.1E-18
9424	150623_at	0.369163	0.370329	5.56183	4.09403e-06	4.07368e-05	4.02701	FBgn0039385	CG5913	CG5913	CG5913	43132	---	---	---	---
12666	153865_at	0.446886	3.05341	5.56129	4.10034e-06	4.07706e-05	4.02549	FBgn0034685	CG6393	CG6393	CG6393	37511	4518 // nuclease activity // inferred from electronic annotation /// 4527 // exonuclease activity // inferred from electronic annotation /// 16787 // hydrolase activity // inferred from electronic annotation	---	5622 // intracellular // inferred from electronic annotation /// 5634 // nucleus // inferred from electronic annotation	IPR006055 // Exonuclease // 6.9E-25 /// IPR006055 // Exonuclease // 6.9E-25
1988	143187_at	0.42862	-0.110205	5.56065	4.10801e-06	4.08179e-05	4.02365	FBgn0001170	CG11607	H2.0	Homeodomain protein 2.0	33841	3677 // DNA binding // inferred from electronic annotation /// 3700 // transcription factor activity // inferred from electronic annotation /// 3704 // specific RNA polymerase II transcription factor activity // inferred from sequence or structural similarity /// 43565 // sequence-specific DNA binding // inferred from electronic annotation /// 3704 // specific RNA polymerase II transcription fact…	6357 // regulation of transcription from RNA polymerase II promoter // inferred from electronic annotation /// 7398 // ectoderm development // inferred from electronic annotation /// 7399 // nervous system development // inferred from electronic annotation /// 6355 // regulation of transcription, DNA-dependent // inferred from electronic annotation /// 7275 // development // inferred from electro…	5634 // nucleus // inferred from sequence or structural similarity /// 5634 // nucleus // non-traceable author statement /// 5634 // nucleus // inferred from electronic annotation /// 5634 // nucleus // inferred from sequence similarity	IPR001356 // Homeobox // 1.9E-21
2083	143282_s_at	0.336235	0.168142	5.55747	4.14588e-06	4.11067e-05	4.01462	FBgn0002933 /// FBgn0010294	CG14266 /// CG10781	ng1 /// ng2	new glue 1 /// new glue 2	31298 /// 31300	5198 // structural molecule activity // non-traceable author statement /// 5515 // protein binding // inferred from physical interaction	7594 // puparial adhesion // non-traceable author statement	5576 // extracellular region // non-traceable author statement	---
3162	144361_at	0.436729	-0.00400783	5.5557	4.1671e-06	4.12587e-05	4.00959	FBgn0040338	CG11639	TfIIA-S-2	TfIIA-S-2	31048	16251 // general RNA polymerase II transcription factor activity // inferred from sequence or structural similarity /// 16251 // general RNA polymerase II transcription factor activity // inferred from sequence similarity	6357 // regulation of transcription from RNA polymerase II promoter // non-traceable author statement /// 6367 // transcription initiation from RNA polymerase II promoter // inferred from sequence or structural similarity /// 6367 // transcription initiation from RNA polymerase II promoter // inferred from sequence similarity	5634 // nucleus // non-traceable author statement /// 5672 // transcription factor TFIIA complex // inferred from sequence or structural similarity /// 5672 // transcription factor TFIIA complex // inferred from sequence similarity	IPR003194 // Transcription initiation factor IIA, gamma subunit // 1.1E-13 /// IPR003194 // Transcription initiation factor IIA, gamma subunit // 8.6E-14
200	141399_at	0.395377	0.620323	5.55449	4.18168e-06	4.13138e-05	4.00615	FBgn0020506	CG8221	Amyrel	Amyrel	36863	4556 // alpha-amylase activity // non-traceable author statement /// 4574 // oligo-1,6-glucosidase activity // non-traceable author statement /// 4556 // alpha-amylase activity // inferred from electronic annotation /// 5509 // calcium ion binding // inferred from electronic annotation /// 16787 // hydrolase activity // inferred from electronic annotation /// 16798 // hydrolase activity, acting o…	5975 // carbohydrate metabolism // inferred from electronic annotation	---	IPR006048 // Alpha amylase, C-terminal all-beta domain // 8.8E-53 /// IPR006047 // Alpha amylase, catalytic domain // 2.1E-84
[truncated: 1,767 more rows]
