# Supplementary material for: Gene expression changes in response to aging compared to heat stress, oxidative stress and ionizing radiation in Drosophila melanogaster
Source: Aging (Albany NY). 2012 Nov 30;4(11):768–89. doi: 10.18632/aging.100499 (PMC3560439; doi:10.18632/aging.100499)
Supplement: Supplementary file 8 [file aging-04-768-s008.xlsx]

## Sheet: TableS4d.Sugardown
Table S4d. Sugar down
ID	M	A	t	P.Value	adj.P.Val	B	FlyBase	Ensembl	Gene.Symbol	Gene.Title	Entrez.Gene	Gene.Ontology.Molecular.Function	Gene.Ontology.Biological.Process	Gene.Ontology.Cellular.Component	InterPro
11567	152766_at	-2.50912	1.32725	-27.3621	1.69167e-23	2.37003e-19	41.9491	FBgn0002563	CG4178	Lsp1	Larval serum protein 1	33274	5344 // oxygen transporter activity // inferred from electronic annotation /// 45735 // nutrient reservoir activity // non-traceable author statement /// 45735 // nutrient reservoir activity // inferred from electronic annotation	6810 // transport // inferred from electronic annotation	5576 // extracellular region // non-traceable author statement /// 5616 // larval serum protein complex // inferred from direct assay	IPR000896 // Arthropod hemocyanin/insect LSP // 8.2E-98 /// IPR005204 // Hemocyanin, N-terminal // 8.4E-38 /// IPR005203 // Hemocyanin, C-terminal // 1.8E-109
4817	146016_at	-2.5125	3.05477	-23.6702	1.31475e-21	9.20979e-18	38.2145	FBgn0028987	CG8137	Spn2	Serine protease inhibitor 2	49807	4867 // serine-type endopeptidase inhibitor activity // inferred from sequence or structural similarity /// 4867 // serine-type endopeptidase inhibitor activity // non-traceable author statement /// 42562 // hormone binding // inferred from sequence or structural similarity /// 4867 // serine-type endopeptidase inhibitor activity // inferred from electronic annotation /// 8233 // peptidase activi…	6508 // proteolysis // inferred from electronic annotation /// 45861 // negative regulation of proteolysis // inferred from sequence or structural similarity /// 45861 // negative regulation of proteolysis // inferred from sequence similarity	---	IPR000215 // Serpin // 1.2E-112
5919	147118_at	-2.97791	3.41103	-20.3211	1.19716e-19	5.59076e-16	34.1806	FBgn0033774	CG12374	CG12374	CG12374	36410	4182 // carboxypeptidase A activity // inferred from sequence or structural similarity /// 5515 // protein binding // inferred from physical interaction /// 4180 // carboxypeptidase activity // inferred from electronic annotation /// 4182 // carboxypeptidase A activity // inferred from electronic annotation /// 4182 // carboxypeptidase A activity // inferred from sequence similarity	6508 // proteolysis // inferred from electronic annotation	---	IPR000834 // Peptidase M14, carboxypeptidase A // 4.3E-52
2628	143827_at	-1.93695	2.10335	-18.5019	1.83274e-18	5.13535e-15	31.6742	FBgn0015586	CG3801	Acp76A	Accessory gland-specific peptide 76A	40078	4867 // serine-type endopeptidase inhibitor activity // inferred from sequence or structural similarity /// 42562 // hormone binding // inferred from sequence or structural similarity /// 4867 // serine-type endopeptidase inhibitor activity // inferred from electronic annotation /// 4867 // serine-type endopeptidase inhibitor activity // inferred from sequence similarity /// 42562 // hormone bind…	45861 // negative regulation of proteolysis // inferred from sequence or structural similarity /// 45861 // negative regulation of proteolysis // inferred from sequence similarity	---	---
408	141607_at	-1.1872	1.05623	-17.6633	6.96145e-18	1.6255e-14	30.4324	FBgn0024988	CG14801	CG14801	CG14801	31136	3676 // nucleic acid binding // inferred from electronic annotation /// 4527 // exonuclease activity // inferred from sequence or structural similarity /// 4532 // exoribonuclease activity // inferred from electronic annotation /// 4518 // nuclease activity // inferred from electronic annotation /// 4527 // exonuclease activity // inferred from electronic annotation /// 16787 // hydrolase activit…	6139 // nucleobase, nucleoside, nucleotide and nucleic acid metabolism // inferred from electronic annotation	5622 // intracellular // inferred from electronic annotation /// 5634 // nucleus // inferred from electronic annotation	IPR006055 // Exonuclease // 1.3E-36 /// IPR006055 // Exonuclease // 1.3E-36 /// IPR006055 // Exonuclease // 1.3E-36
2472	143671_at	-1.28191	5.90365	-16.2314	7.70194e-17	1.3488e-13	28.1728	FBgn0011668	CG9074	Mst57Da	Male-specific RNA 57Da	47954	5515 // protein binding // inferred from physical interaction	6952 // defense response // inferred from sequence or structural similarity /// 18991 // oviposition // non-traceable author statement /// 45297 // post-mating behavior // non-traceable author statement /// 7610 // behavior // inferred from electronic annotation /// 6952 // defense response // inferred from sequence similarity	5576 // extracellular region // non-traceable author statement	---
4570	145769_at	-1.68309	2.12213	-16.2475	7.49033e-17	1.3488e-13	28.1991	FBgn0031617	CG15635	CG15635	CG15635	33665	3677 // DNA binding // inferred from electronic annotation /// 8170 // N-methyltransferase activity // inferred from electronic annotation	6306 // DNA methylation // inferred from electronic annotation	---	---
9501	150700_at	-2.03835	0.351231	-15.8663	1.46058e-16	2.27364e-13	27.5666	FBgn0039472	CG17192	CG17192	CG17192	43248	4806 // triacylglycerol lipase activity // inferred from sequence or structural similarity /// 5198 // structural molecule activity // inferred from electronic annotation /// 8970 // phospholipase A1 activity // inferred from electronic annotation /// 3824 // catalytic activity // inferred from electronic annotation /// 4806 // triacylglycerol lipase activity // inferred from sequence similarity	6629 // lipid metabolism // inferred from electronic annotation /// 7018 // microtubule-based movement // inferred from electronic annotation	5874 // microtubule // inferred from electronic annotation	IPR000734 // Lipase // 1.4E-47
2405	143604_r_at	-2.58985	2.1609	-15.6529	2.13443e-16	2.99034e-13	27.2064	FBgn0050025 /// FBgn0050031 /// FBgn0010359 /// FBgn0010358	CG30028 /// CG30031 /// CG30025 /// CG12351	CG30025 /// CG30031 /// Try	CG30025 /// CG30031 /// Trypsin /// Trypsin	246398 /// 246404 /// 36221 /// 48343	4252 // serine-type endopeptidase activity // non-traceable author statement /// 4263 // chymotrypsin activity // inferred from electronic annotation /// 4295 // trypsin activity // inferred from electronic annotation /// 4295 // trypsin activity // non-traceable author statement /// 4295 // trypsin activity // inferred from sequence or structural similarity /// 19899 // enzyme binding // inferre…	6508 // proteolysis // inferred from electronic annotation /// 6508 // proteolysis // non-traceable author statement /// 6508 // proteolysis // inferred from sequence or structural similarity /// 30422 // RNA interference, production of siRNA // inferred from mutant phenotype /// 30423 // RNA interference, targeting of mRNA for destruction // inferred from mutant phenotype /// 35196 // miRNA-medi…	5576 // extracellular region // non-traceable author statement /// 5576 // extracellular region // inferred from sequence or structural similarity /// 5576 // extracellular region // inferred from sequence similarity	IPR001254 // Peptidase S1, chymotrypsin // 1.7E-85
9500	150699_at	-2.16387	2.25955	-15.197	4.86739e-16	6.19929e-13	26.4215	FBgn0039471	CG6295	CG6295	CG6295	43247	4806 // triacylglycerol lipase activity // inferred from sequence or structural similarity /// 8970 // phospholipase A1 activity // inferred from electronic annotation /// 3824 // catalytic activity // inferred from electronic annotation /// 4806 // triacylglycerol lipase activity // inferred from sequence similarity	6629 // lipid metabolism // inferred from electronic annotation	---	IPR000734 // Lipase // 5.1E-49
9170	150369_at	-1.56859	1.98564	-14.7124	1.19393e-15	1.39391e-12	25.5641	FBgn0038973	CG18594	CG18594	CG18594	42644	19207 // kinase regulator activity // inferred from electronic annotation /// 19210 // kinase inhibitor activity // inferred from electronic annotation /// 5515 // protein binding // inferred from physical interaction	7165 // signal transduction // inferred from electronic annotation	---	IPR008914 // PEBP // 1.9E-57
2404	143603_i_at	-2.18767	2.88584	-14.1981	3.17154e-15	3.41795e-12	24.627	FBgn0050031 /// FBgn0010359 /// FBgn0010358	CG30028 /// CG30031 /// CG12351	CG30031 /// Try	CG30031 /// Trypsin /// Trypsin	246404 /// 36221 /// 48343	4252 // serine-type endopeptidase activity // non-traceable author statement /// 4263 // chymotrypsin activity // inferred from electronic annotation /// 4295 // trypsin activity // inferred from electronic annotation /// 4295 // trypsin activity // non-traceable author statement /// 4295 // trypsin activity // inferred from sequence or structural similarity /// 19899 // enzyme binding // inferre…	6508 // proteolysis // inferred from electronic annotation /// 6508 // proteolysis // non-traceable author statement /// 6508 // proteolysis // inferred from sequence or structural similarity /// 30422 // RNA interference, production of siRNA // inferred from mutant phenotype /// 30423 // RNA interference, targeting of mRNA for destruction // inferred from mutant phenotype /// 35196 // miRNA-medi…	5576 // extracellular region // non-traceable author statement /// 5576 // extracellular region // inferred from sequence or structural similarity /// 5576 // extracellular region // inferred from sequence similarity	IPR001254 // Peptidase S1, chymotrypsin // 1.7E-85
2040	143239_at	-2.1526	2.02925	-13.7917	6.9927e-15	6.9977e-12	23.8661	FBgn0002565	CG6806	Lsp2	Larval serum protein 2	45326	4182 // carboxypeptidase A activity // inferred from electronic annotation /// 5344 // oxygen transporter activity // inferred from electronic annotation /// 45735 // nutrient reservoir activity // non-traceable author statement /// 5515 // protein binding // inferred from physical interaction /// 45735 // nutrient reservoir activity // inferred from electronic annotation	6508 // proteolysis // inferred from electronic annotation /// 6810 // transport // inferred from electronic annotation	5576 // extracellular region // non-traceable author statement /// 5616 // larval serum protein complex // inferred from direct assay	IPR000896 // Arthropod hemocyanin/insect LSP // 4.0E-48 /// IPR005204 // Hemocyanin, N-terminal // 1.6E-16 /// IPR005203 // Hemocyanin, C-terminal // 1.1E-74
9377	150576_at	-1.0182	2.6363	-12.7789	5.41126e-14	4.73824e-11	21.8874	FBgn0039312	CG10514	CG10514	CG10514	43052	5515 // protein binding // inferred from physical interaction /// 16301 // kinase activity // inferred from electronic annotation /// 16740 // transferase activity // inferred from electronic annotation	---	---	IPR004119 // Protein of unknown function DUF227 // 2.2E-121
2100	143299_at	-2.04367	5.8616	-12.499	9.71604e-14	8.00716e-11	21.319	FBgn0003067	CG17725	Pepck	Phosphoenolpyruvate carboxykinase	37131	4613 // phosphoenolpyruvate carboxykinase (GTP) activity // inferred from sequence or structural similarity /// 5525 // GTP binding // inferred from electronic annotation /// 166 // nucleotide binding // inferred from electronic annotation /// 4611 // phosphoenolpyruvate carboxykinase activity // inferred from electronic annotation /// 4613 // phosphoenolpyruvate carboxykinase (GTP) activity // i…	6094 // gluconeogenesis // inferred from sequence or structural similarity /// 6094 // gluconeogenesis // non-traceable author statement /// 6094 // gluconeogenesis // inferred from electronic annotation /// 6094 // gluconeogenesis // inferred from sequence similarity	5739 // mitochondrion // inferred from sequence or structural similarity /// 5739 // mitochondrion // inferred from sequence similarity	IPR008209 // Phosphoenolpyruvate carboxykinase (GTP) // 1.0E-126 /// IPR008209 // Phosphoenolpyruvate carboxykinase (GTP) // 1.0E-126
6897	148096_at	-0.84915	0.393786	-12.3885	1.2271e-13	9.04825e-11	21.0921	FBgn0035424	CG11505	CG11505	CG11505	38399	166 // nucleotide binding // inferred from electronic annotation	---	---	IPR006630 // RNA-binding protein Lupus Lal // 4.6E-30 /// IPR006630 // RNA-binding protein Lupus Lal // 4.6E-30
5356	146555_at	-1.19727	2.73881	-12.2691	1.58199e-13	1.10818e-10	20.8449	FBgn0028986	CG9334	Spn3	Serine protease inhibitor 3	49806	4867 // serine-type endopeptidase inhibitor activity // inferred from sequence or structural similarity /// 4867 // serine-type endopeptidase inhibitor activity // non-traceable author statement /// 4867 // serine-type endopeptidase inhibitor activity // inferred from electronic annotation /// 8233 // peptidase activity // inferred from electronic annotation /// 4867 // serine-type endopeptidase …	6508 // proteolysis // inferred from electronic annotation /// 45861 // negative regulation of proteolysis // inferred from sequence or structural similarity /// 45861 // negative regulation of proteolysis // inferred from sequence similarity	---	IPR000215 // Serpin // 1.4E-106
2473	143672_at	-1.4011	5.76972	-12.0754	2.39657e-13	1.52618e-10	20.4405	FBgn0011669	CG5016	Mst57Db	Male-specific RNA 57Db	43122	4418 // hydroxymethylbilane synthase activity // inferred from electronic annotation	18991 // oviposition // non-traceable author statement /// 45297 // post-mating behavior // non-traceable author statement /// 6779 // porphyrin biosynthesis // inferred from electronic annotation	5576 // extracellular region // non-traceable author statement	---
5953	147152_at	-1.19572	1.21922	-12.0456	2.55585e-13	1.55684e-10	20.3778	FBgn0019928	CG4812	Ser8	Ser8	36489	4263 // chymotrypsin activity // inferred from electronic annotation /// 4295 // trypsin activity // inferred from sequence or structural similarity /// 4295 // trypsin activity // non-traceable author statement /// 8236 // serine-type peptidase activity // inferred from sequence or structural similarity /// 4252 // serine-type endopeptidase activity // inferred from electronic annotation /// 823…	6508 // proteolysis // non-traceable author statement /// 6508 // proteolysis // inferred from electronic annotation	---	IPR001254 // Peptidase S1, chymotrypsin // 2.4E-86
2073	143272_at	-1.20607	3.24277	-12.0181	2.71246e-13	1.5834e-10	20.3198	FBgn0002855	CG8982	Acp26Aa	Accessory gland-specific peptide 26Aa	33817	5179 // hormone activity // non-traceable author statement	7321 // sperm displacement // non-traceable author statement /// 7618 // mating // inferred from electronic annotation /// 18991 // oviposition // non-traceable author statement /// 18991 // oviposition // traceable author statement /// 30728 // ovulation // inferred from mutant phenotype /// 30728 // ovulation // traceable author statement /// 45297 // post-mating behavior // non-traceable autho…	5576 // extracellular region // non-traceable author statement	IPR004315 // Male Drosophila accessory gland secretory protein // 1.0E-126
13778	154977_at	-0.764991	1.68242	-11.949	3.15052e-13	1.76555e-10	20.1739	FBgn0030306	CG1751	CG1751	CG1751	32095	9003 // signal peptidase activity // inferred from sequence or structural similarity /// 9003 // signal peptidase activity // non-traceable author statement /// 8233 // peptidase activity // inferred from electronic annotation /// 9003 // signal peptidase activity // inferred from electronic annotation /// 16787 // hydrolase activity // inferred from electronic annotation /// 9003 // signal pepti…	6465 // signal peptide processing // inferred from sequence or structural similarity /// 6508 // proteolysis // inferred from electronic annotation /// 6465 // signal peptide processing // inferred from electronic annotation /// 6465 // signal peptide processing // inferred from sequence similarity	5787 // signal peptidase complex // inferred from sequence or structural similarity /// 5792 // microsome // inferred from electronic annotation /// 16021 // integral to membrane // non-traceable author statement /// 5783 // endoplasmic reticulum // inferred from electronic annotation /// 5787 // signal peptidase complex // inferred from electronic annotation /// 16020 // membrane // inferred fro…	IPR009582 // Microsomal signal peptidase 25 kDa subunit // 6.9E-118
6068	147267_at	-0.608034	0.271685	-11.8365	4.02548e-13	2.16912e-10	19.9349	FBgn0034052	CG8299	CG8299	CG8299	36751	4252 // serine-type endopeptidase activity // inferred from sequence or structural similarity /// 4263 // chymotrypsin activity // inferred from electronic annotation /// 4295 // trypsin activity // non-traceable author statement /// 4252 // serine-type endopeptidase activity // inferred from sequence similarity	6508 // proteolysis // non-traceable author statement	---	IPR001254 // Peptidase S1, chymotrypsin // 1.2E-73
7917	149116_at	-1.75797	4.63179	-11.7379	4.99578e-13	2.43781e-10	19.7241	FBgn0036969	CG6663	CG6663	CG6663	40235	4867 // serine-type endopeptidase inhibitor activity // inferred from sequence or structural similarity /// 4867 // serine-type endopeptidase inhibitor activity // inferred from sequence similarity	---	---	IPR000215 // Serpin // 1.1E-15
11864	153063_at	-0.72982	2.3302	-11.7492	4.87342e-13	2.43781e-10	19.7483	FBgn0032713	CG17323	CG17323	CG17323	35138	15020 // glucuronosyltransferase activity // inferred from sequence or structural similarity /// 16740 // transferase activity // inferred from electronic annotation /// 16757 // transferase activity, transferring glycosyl groups // inferred from electronic annotation /// 16758 // transferase activity, transferring hexosyl groups // inferred from electronic annotation /// 15020 // glucuronosyltra…	5976 // polysaccharide metabolism // inferred from electronic annotation /// 6952 // defense response // inferred from electronic annotation /// 8202 // steroid metabolism // inferred from electronic annotation /// 9636 // response to toxin // inferred from electronic annotation /// 8152 // metabolism // inferred from electronic annotation	---	IPR002213 // UDP-glucoronosyl/UDP-glucosyl transferase // 1.9E-42
11888	153087_at	-0.882727	2.7081	-11.7333	5.04614e-13	2.43781e-10	19.7143	FBgn0034479	CG8654	CG8654	CG8654	37275	8513 // organic cation porter activity // inferred from sequence or structural similarity /// 5215 // transporter activity // inferred from electronic annotation /// 8513 // organic cation porter activity // inferred from sequence similarity	6812 // cation transport // inferred from electronic annotation /// 6820 // anion transport // inferred from electronic annotation /// 6858 // extracellular transport // inferred from electronic annotation /// 6810 // transport // inferred from electronic annotation	16021 // integral to membrane // inferred from electronic annotation /// 16020 // membrane // inferred from electronic annotation	IPR005828 // General substrate transporter // 9.8E-25
4976	146175_at	-1.59376	3.82536	-11.6973	5.46178e-13	2.55065e-10	19.6371	FBgn0032275	CG17097	CG17097	CG17097	34461	4806 // triacylglycerol lipase activity // inferred from sequence or structural similarity /// 16298 // lipase activity // inferred from sequence or structural similarity /// 3824 // catalytic activity // inferred from electronic annotation /// 16787 // hydrolase activity // inferred from electronic annotation /// 16789 // carboxylic ester hydrolase activity // inferred from electronic annotation…	6629 // lipid metabolism // inferred from electronic annotation /// 6629 // lipid metabolism // inferred from sequence or structural similarity /// 16042 // lipid catabolism // inferred from electronic annotation /// 6629 // lipid metabolism // inferred from sequence similarity	---	IPR006693 // Ab-hydrolase associated lipase region // 7.9E-24 /// IPR006693 // Ab-hydrolase associated lipase region // 7.9E-24
7916	149115_at	-1.56681	3.6958	-11.6403	6.19367e-13	2.79914e-10	19.5143	FBgn0036970	CG6289	CG6289	CG6289	40236	4867 // serine-type endopeptidase inhibitor activity // inferred from sequence or structural similarity /// 4867 // serine-type endopeptidase inhibitor activity // inferred from electronic annotation /// 4867 // serine-type endopeptidase inhibitor activity // inferred from sequence similarity	45861 // negative regulation of proteolysis // inferred from sequence or structural similarity /// 45861 // negative regulation of proteolysis // inferred from sequence similarity	---	IPR000215 // Serpin // 0.016 /// IPR000215 // Serpin // 1.9E-16
3172	144371_at	-0.738708	1.28803	-11.5756	7.14668e-13	3.12891e-10	19.3745	FBgn0040362	CG11379	CG11379	CG11379	31062	5515 // protein binding // inferred from physical interaction	---	---	---
13039	154238_at	-1.48501	1.43497	-11.5356	7.80927e-13	3.30387e-10	19.2878	FBgn0011763	CG4654	Dp	DP transcription factor	36461	3677 // DNA binding // inferred from direct assay /// 3700 // transcription factor activity // inferred from electronic annotation /// 3702 // RNA polymerase II transcription factor activity // non-traceable author statement /// 3704 // specific RNA polymerase II transcription factor activity // non-traceable author statement /// 5515 // protein binding // inferred from physical interaction /// 3…	74 // regulation of progression through cell cycle // inferred from mutant phenotype /// 74 // regulation of progression through cell cycle // non-traceable author statement /// 6357 // regulation of transcription from RNA polymerase II promoter // non-traceable author statement /// 7049 // cell cycle // inferred from mutant phenotype /// 7113 // endomitotic cell cycle // traceable author stateme…	5634 // nucleus // non-traceable author statement /// 5667 // transcription factor complex // inferred from electronic annotation /// 31523 // Myb complex // inferred from direct assay /// 35189 // Rb-E2F complex // inferred from direct assay /// 5634 // nucleus // inferred from electronic annotation	IPR003316 // Transcription factor E2F/dimerisation partner (TDP) // 1.0E-126 /// IPR003316 // Transcription factor E2F/dimerisation partner (TDP) // 1.0E-126
2461	143660_at	-1.25382	1.51962	-11.2137	1.60615e-12	5.82037e-10	18.5826	FBgn0011555	CG12385	Try	Trypsin	36218	4263 // chymotrypsin activity // inferred from electronic annotation /// 4295 // trypsin activity // inferred from sequence or structural similarity /// 4295 // trypsin activity // non-traceable author statement /// 4252 // serine-type endopeptidase activity // inferred from electronic annotation /// 4295 // trypsin activity // inferred from electronic annotation /// 8233 // peptidase activity //…	6508 // proteolysis // non-traceable author statement /// 6508 // proteolysis // inferred from electronic annotation	5576 // extracellular region // non-traceable author statement	IPR001254 // Peptidase S1, chymotrypsin // 5.3E-85
4409	145608_at	-0.692571	0.508475	-11.025	2.46574e-12	7.67666e-10	18.1628	FBgn0031373	CG15358	CG15358	CG15358	33366	5529 // sugar binding // inferred from electronic annotation	7275 // development // inferred from electronic annotation /// 7276 // gametogenesis // inferred from electronic annotation /// 7283 // spermatogenesis // inferred from electronic annotation	---	IPR001304 // C-type lectin // 1.5E-19
8020	149219_at	-0.553671	1.26898	-11.0269	2.45516e-12	7.67666e-10	18.167	FBgn0037147	CG7140	CG7140	CG7140	40445	4345 // glucose-6-phosphate 1-dehydrogenase activity // inferred from sequence or structural similarity /// 4345 // glucose-6-phosphate 1-dehydrogenase activity // inferred from electronic annotation /// 16491 // oxidoreductase activity // inferred from electronic annotation /// 4345 // glucose-6-phosphate 1-dehydrogenase activity // inferred from sequence similarity	5996 // monosaccharide metabolism // inferred from electronic annotation /// 6006 // glucose metabolism // inferred from electronic annotation /// 5975 // carbohydrate metabolism // inferred from electronic annotation	---	IPR001282 // Glucose-6-phosphate dehydrogenase // 1.4E-76 /// IPR001282 // Glucose-6-phosphate dehydrogenase // 1.0E-65
10257	151456_at	-0.742801	-0.621567	-10.7343	4.8142e-12	1.40514e-09	17.5068	FBgn0051688	CG31688	CG31688	CG31688	35314	---	---	---	IPR001602 // Protein of unknown function UPF0047 // 7.8E-44
9673	150872_at	-0.650967	0.0953954	-10.6787	5.47859e-12	1.5351e-09	17.3799	FBgn0039747	CG9753	CG9753	CG9753	43583	1609 // adenosine receptor activity, G-protein coupled // inferred from sequence or structural similarity /// 4930 // G-protein coupled receptor activity // inferred from electronic annotation /// 1609 // adenosine receptor activity, G-protein coupled // inferred from sequence similarity	7186 // G-protein coupled receptor protein signaling pathway // inferred from sequence or structural similarity /// 7270 // nerve-nerve synaptic transmission // inferred from electronic annotation /// 7186 // G-protein coupled receptor protein signaling pathway // inferred from sequence similarity	5886 // plasma membrane // inferred from electronic annotation /// 16021 // integral to membrane // inferred from sequence or structural similarity /// 16021 // integral to membrane // inferred from sequence similarity	IPR000276 // Rhodopsin-like GPCR superfamily // 7.8E-72
4975	146174_s_at	-1.48846	3.97832	-10.6225	6.24578e-12	1.70949e-09	17.2513	FBgn0043825 /// FBgn0051872	CG31872 /// CG18284	CG18284 /// CG31872	CG18284 /// CG31872	34458 /// 34460	4806 // triacylglycerol lipase activity // inferred from sequence or structural similarity /// 16298 // lipase activity // inferred from electronic annotation /// 16298 // lipase activity // inferred from sequence or structural similarity /// 16787 // hydrolase activity // inferred from electronic annotation /// 3824 // catalytic activity // inferred from electronic annotation /// 16789 // carbox…	6629 // lipid metabolism // inferred from electronic annotation /// 6629 // lipid metabolism // inferred from sequence or structural similarity /// 16042 // lipid catabolism // inferred from electronic annotation /// 6629 // lipid metabolism // inferred from sequence similarity	---	IPR006693 // Ab-hydrolase associated lipase region // 1.3E-24 /// IPR006693 // Ab-hydrolase associated lipase region // 1.3E-23
9331	150530_at	-0.612451	1.3686	-10.6157	6.345e-12	1.70949e-09	17.2358	---	---	---	---	---	---	---	---	---
1693	142892_at	-0.841843	3.2852	-10.5278	7.79441e-12	2.06037e-09	17.0338	FBgn0053113	CG33113	Rtnl1	Rtnl1	33721	5057 // receptor signaling protein activity // inferred from electronic annotation /// 5509 // calcium ion binding // inferred from electronic annotation	6886 // intracellular protein transport // inferred from electronic annotation	5783 // endoplasmic reticulum // inferred from electronic annotation	IPR003388 // Reticulon // 3.7E-115 /// IPR003388 // Reticulon // 2.5E-116 /// IPR003388 // Reticulon // 2.5E-116 /// IPR003388 // Reticulon // 2.5E-116 /// IPR003388 // Reticulon // 2.5E-116 /// IPR003388 // Reticulon // 3.7E-115
13021	154220_at	-0.582222	0.425998	-10.4359	9.6759e-12	2.46472e-09	16.8215	FBgn0026189	CG7740	prominin-like	prominin-like	38372	---	6886 // intracellular protein transport // inferred from electronic annotation	5886 // plasma membrane // non-traceable author statement /// 16021 // integral to membrane // inferred from electronic annotation /// 16020 // membrane // inferred from electronic annotation	IPR008795 // Prominin // 1.0E-126
6628	147827_at	-0.736889	0.0945688	-10.3541	1.17404e-11	2.93719e-09	16.6314	FBgn0053519	CG33519	CG33519	CG33519	3346201	5524 // ATP binding // inferred from electronic annotation /// 4672 // protein kinase activity // inferred from electronic annotation	6468 // protein amino acid phosphorylation // inferred from electronic annotation	---	IPR003961 // Fibronectin, type III // 2.8E-8 /// IPR003961 // Fibronectin, type III // 9.2E-14 /// IPR000719 // Protein kinase // 1.9E-51 /// IPR000719 // Protein kinase // 9.3E-42 /// IPR007110 // Immunoglobulin-like // 3.2 /// IPR007110 // Immunoglobulin-like // 7.8E-5 /// IPR007110 // Immunoglobulin-like // 2.2E-5 /// IPR007110 // Immunoglobulin-like // 0.1 /// IPR007110 // Immunoglobulin-like…
5621	146820_at	-0.539913	0.222909	-10.2514	1.49859e-11	3.68339e-09	16.3915	FBgn0033308	CG8736	CG8736	CG8736	35841	---	---	---	---
7678	148877_at	-1.37176	3.70979	-10.1694	1.82244e-11	4.18563e-09	16.1991	FBgn0042201 /// FBgn0068114	CG13061	Nplp3 /// DyakNplp3	Neuropeptide-like precursor 3 /// Nplp3	59235	5184 // neuropeptide hormone activity // non-traceable author statement	7218 // neuropeptide signaling pathway // non-traceable author statement /// 7218 // neuropeptide signaling pathway // inferred from electronic annotation	5576 // extracellular region // non-traceable author statement	---
3107	144306_at	-0.623461	1.52357	-10.1278	2.01346e-11	4.42541e-09	16.1011	FBgn0028915	CG7532	CG7532	CG7532	34838	4252 // serine-type endopeptidase activity // inferred from sequence or structural similarity /// 4252 // serine-type endopeptidase activity // inferred from sequence similarity	---	---	IPR002861 // Reeler region // 8.5E-11
12382	153581_at	-0.548279	2.58448	-10.1261	2.0216e-11	4.42541e-09	16.0971	FBgn0022268	CG5183	KdelR	KDEL receptor	34427	4872 // receptor activity // inferred from electronic annotation /// 5046 // KDEL sequence binding // inferred from sequence or structural similarity /// 5046 // KDEL sequence binding // non-traceable author statement /// 46923 // ER retention sequence binding // inferred from electronic annotation /// 5046 // KDEL sequence binding // inferred from sequence similarity	6621 // protein retention in ER // non-traceable author statement /// 6887 // exocytosis // inferred from electronic annotation /// 6890 // retrograde vesicle-mediated transport, Golgi to ER // inferred from sequence or structural similarity /// 6890 // retrograde vesicle-mediated transport, Golgi to ER // non-traceable author statement /// 6891 // intra-Golgi vesicle-mediated transport // non-tr…	5783 // endoplasmic reticulum // non-traceable author statement /// 16021 // integral to membrane // non-traceable author statement /// 30140 // trans-Golgi network transport vesicle // inferred from sequence or structural similarity /// 30140 // trans-Golgi network transport vesicle // non-traceable author statement /// 5783 // endoplasmic reticulum // inferred from electronic annotation /// 160…	IPR000133 // ER lumen protein retaining receptor // 1.0E-126
11586	152785_at	-0.671964	1.11645	-10.1066	2.11863e-11	4.56647e-09	16.051	FBgn0034500	CG11200	CG11200	CG11200	37301	4090 // carbonyl reductase (NADPH) activity // inferred from sequence or structural similarity /// 5515 // protein binding // inferred from physical interaction /// 16491 // oxidoreductase activity // inferred from electronic annotation /// 4090 // carbonyl reductase (NADPH) activity // inferred from sequence similarity	8152 // metabolism // inferred from electronic annotation	---	IPR002198 // Short-chain dehydrogenase/reductase SDR // 1.4E-36
10782	151981_at	-0.707521	-0.0967164	-10.0748	2.28651e-11	4.85364e-09	15.976	FBgn0003430	CG16738	slp1	sloppy paired 1	33607	3700 // transcription factor activity // non-traceable author statement /// 3702 // RNA polymerase II transcription factor activity // inferred from sequence or structural similarity /// 5515 // protein binding // inferred from physical interaction /// 3677 // DNA binding // inferred from electronic annotation /// 3700 // transcription factor activity // inferred from electronic annotation /// 43…	1707 // mesoderm formation // traceable author statement /// 6357 // regulation of transcription from RNA polymerase II promoter // inferred from electronic annotation /// 7350 // blastoderm segmentation // traceable author statement /// 7379 // segment specification // non-traceable author statement /// 7380 // specification of segmental identity, head // inferred from expression pattern /// 738…	5634 // nucleus // inferred from sequence or structural similarity /// 5634 // nucleus // non-traceable author statement /// 5634 // nucleus // inferred from electronic annotation /// 5634 // nucleus // inferred from sequence similarity	IPR001766 // Fork head transcription factor // 1.5E-66
9997	151196_r_at	-0.716174	1.71649	-10.0465	2.44775e-11	4.96999e-09	15.9089	FBgn0040718	CG15353	CG15353	CG15353	50191	---	---	---	---
8369	149568_at	-0.7749	2.53435	-10.04	2.48642e-11	4.97639e-09	15.8935	FBgn0037714	CG9396	CG9396	CG9396	41156	---	---	---	IPR005336 // Protein of unknown function UPF0041 // 5.7E-44
8370	149569_at	-0.684404	2.63244	-10.0246	2.58058e-11	5.09011e-09	15.8569	FBgn0037715	CG9399	CG9399	CG9399	41157	5515 // protein binding // inferred from physical interaction	---	---	IPR005336 // Protein of unknown function UPF0041 // 3.0E-42
11825	153024_at	-0.788331	4.82747	-10.005	2.70567e-11	5.10844e-09	15.8103	FBgn0004551	CG3725	Ca-P60A	Calcium ATPase at 60A	49297	5388 // calcium-transporting ATPase activity // inferred from sequence or structural similarity /// 5388 // calcium-transporting ATPase activity // non-traceable author statement /// 5524 // ATP binding // inferred from electronic annotation /// 16820 // hydrolase activity, acting on acid anhydrides, catalyzing transmembrane movement of substances // inferred from electronic annotation /// 166 //…	6816 // calcium ion transport // non-traceable author statement /// 6874 // calcium ion homeostasis // inferred from electronic annotation /// 7274 // neuromuscular synaptic transmission // inferred from mutant phenotype /// 8152 // metabolism // inferred from electronic annotation /// 51282 // regulation of sequestering of calcium ion // inferred from mutant phenotype /// 6810 // transport // in…	5635 // nuclear envelope // inferred from direct assay /// 5783 // endoplasmic reticulum // inferred from direct assay /// 5783 // endoplasmic reticulum // inferred from sequence or structural similarity /// 5789 // endoplasmic reticulum membrane // non-traceable author statement /// 16021 // integral to membrane // non-traceable author statement /// 16529 // sarcoplasmic reticulum // non-traceab…	IPR006068 // Cation transporting ATPase, C-terminal // 8.1E-82 /// IPR008250 // E1-E2 ATPase-associated region // 1.5E-125 /// IPR005834 // Haloacid dehalogenase-like hydrolase // 5.3E-15 /// IPR004014 // Cation transporting ATPase, N-terminal // 3.9E-32
8589	149788_at	-0.750012	2.09823	-9.95173	3.0774e-11	5.58899e-09	15.6836	FBgn0038067	CG11598	CG11598	CG11598	41554	4806 // triacylglycerol lipase activity // inferred from sequence or structural similarity /// 16298 // lipase activity // inferred from sequence or structural similarity /// 3824 // catalytic activity // inferred from electronic annotation /// 16787 // hydrolase activity // inferred from electronic annotation /// 16789 // carboxylic ester hydrolase activity // inferred from electronic annotation…	6629 // lipid metabolism // inferred from electronic annotation /// 6629 // lipid metabolism // inferred from sequence or structural similarity /// 16042 // lipid catabolism // inferred from electronic annotation /// 6629 // lipid metabolism // inferred from sequence similarity	---	IPR000073 // Alpha/beta hydrolase fold // 2.2E-14 /// IPR006693 // Ab-hydrolase associated lipase region // 3.7E-19 /// IPR000073 // Alpha/beta hydrolase fold // 2.2E-14 /// IPR006693 // Ab-hydrolase associated lipase region // 1.7E-20
9694	150893_f_at	-1.82843	4.23988	-9.92587	3.27637e-11	5.81037e-09	15.622	FBgn0039778 /// FBgn0039777	CG2229 /// CG18030	Jon99Fi /// Jon99Fii	Jonah 99Fi /// Jonah 99Fii	43621 /// 43622	4252 // serine-type endopeptidase activity // inferred from sequence or structural similarity /// 4263 // chymotrypsin activity // inferred from electronic annotation /// 4295 // trypsin activity // inferred from electronic annotation /// 42708 // elastase activity // non-traceable author statement /// 3700 // transcription factor activity // inferred from mutant phenotype /// 4252 // serine-type…	6508 // proteolysis // non-traceable author statement /// 2168 // larval development (sensu Insecta) // inferred from mutant phenotype /// 7591 // molting cycle (sensu Insecta) // inferred from mutant phenotype /// 6508 // proteolysis // inferred from electronic annotation	5634 // nucleus // inferred from direct assay	IPR001254 // Peptidase S1, chymotrypsin // 8.0E-56 /// IPR001254 // Peptidase S1, chymotrypsin // 3.7E-55
13059	154258_at	-0.668516	0.206857	-9.87997	3.66248e-11	6.41392e-09	15.5123	FBgn0027951	CG2244	MTA1-like	MTA1-like	40693	3676 // nucleic acid binding // inferred from electronic annotation /// 3677 // DNA binding // inferred from electronic annotation /// 3700 // transcription factor activity // inferred from electronic annotation /// 8270 // zinc ion binding // inferred from electronic annotation /// 43565 // sequence-specific DNA binding // inferred from electronic annotation /// 46872 // metal ion binding // inf…	6355 // regulation of transcription, DNA-dependent // inferred from electronic annotation	118 // histone deacetylase complex // inferred from direct assay /// 5634 // nucleus // inferred from electronic annotation	IPR000679 // Zn-finger, GATA type // 9.3E-11 /// IPR001005 // Myb DNA-binding domain // 1.4E-9 /// IPR000949 // ELM2 domain // 7.8E-26 /// IPR001025 // Bromo adjacent region // 2.0E-7 /// IPR001025 // Bromo adjacent region // 1.2E-10 /// IPR000679 // Zn-finger, GATA type // 9.3E-11 /// IPR001005 // Myb DNA-binding domain // 1.4E-9 /// IPR000949 // ELM2 domain // 7.8E-26 /// IPR001025 // Bromo adj…
2759	143958_at	-1.52228	4.25572	-9.85262	3.91443e-11	6.77051e-09	15.4468	FBgn0022355	CG6186	Tsf1	Transferrin 1	32821	5381 // iron ion transporter activity // inferred from sequence or structural similarity /// 5381 // iron ion transporter activity // non-traceable author statement /// 5386 // carrier activity // inferred from electronic annotation /// 8199 // ferric iron binding // inferred from sequence or structural similarity /// 8199 // ferric iron binding // inferred from electronic annotation /// 5381 // …	6826 // iron ion transport // non-traceable author statement /// 6879 // iron ion homeostasis // inferred from sequence or structural similarity /// 6952 // defense response // non-traceable author statement /// 6826 // iron ion transport // inferred from electronic annotation /// 6879 // iron ion homeostasis // inferred from electronic annotation /// 6879 // iron ion homeostasis // inferred from…	5576 // extracellular region // inferred from electronic annotation	IPR001156 // Peptidase S60, transferrin lactoferrin // 8.1E-9 /// IPR001156 // Peptidase S60, transferrin lactoferrin // 1.4E-4 /// IPR001156 // Peptidase S60, transferrin lactoferrin // 0.013
4180	145379_at	-0.688199	0.16216	-9.82573	4.17942e-11	7.05466e-09	15.3823	FBgn0031036	CG14220	CG14220	CG14220	32954	---	---	---	---
8108	149307_at	-0.507595	1.96166	-9.80754	4.36896e-11	7.07947e-09	15.3386	FBgn0037292	CG2022	CG2022	CG2022	40615	5057 // receptor signaling protein activity // inferred from electronic annotation	---	5778 // peroxisomal membrane // inferred from sequence or structural similarity /// 16021 // integral to membrane // inferred from electronic annotation /// 5778 // peroxisomal membrane // inferred from sequence similarity	IPR007248 // Mpv17/PMP22 // 5.4E-46
8411	149610_at	-1.04804	1.20336	-9.80499	4.39625e-11	7.07947e-09	15.3325	FBgn0037782	CG12813	CG12813	CG12813	41232	---	---	---	IPR003172 // E1 protein and Def2/Der2 allergen // 4.6E-40
7056	148255_at	-1.51173	0.764639	-9.76311	4.86986e-11	7.66593e-09	15.2317	FBgn0035667	CG10475	Jon65Ai	Jonah 65Ai	38685	4252 // serine-type endopeptidase activity // inferred from sequence or structural similarity /// 4252 // serine-type endopeptidase activity // non-traceable author statement /// 4263 // chymotrypsin activity // inferred from electronic annotation /// 4295 // trypsin activity // inferred from electronic annotation /// 5515 // protein binding // inferred from physical interaction /// 4252 // serin…	6508 // proteolysis // non-traceable author statement /// 6508 // proteolysis // inferred from electronic annotation	---	IPR001254 // Peptidase S1, chymotrypsin // 3.1E-39
5348	146547_at	-0.774893	3.55068	-9.75828	4.92774e-11	7.67084e-09	15.22	FBgn0032868	CG17472	CG17472	CG17472	35320	---	---	---	---
4356	145555_at	-0.806754	0.278539	-9.7337	5.23329e-11	8.05697e-09	15.1608	FBgn0031294	CG31795	ia2	ia2	33277	4725 // protein tyrosine phosphatase activity // non-traceable author statement /// 5001 // transmembrane receptor protein tyrosine phosphatase activity // inferred from sequence or structural similarity /// 5001 // transmembrane receptor protein tyrosine phosphatase activity // non-traceable author statement /// 4721 // phosphoprotein phosphatase activity // inferred from electronic annotation /…	6470 // protein amino acid dephosphorylation // non-traceable author statement /// 6470 // protein amino acid dephosphorylation // inferred from electronic annotation	5886 // plasma membrane // inferred from sequence or structural similarity /// 5886 // plasma membrane // inferred from sequence similarity	IPR000242 // Tyrosine specific protein phosphatase // 4.7E-101 /// IPR000242 // Tyrosine specific protein phosphatase // 4.7E-101
4967	146166_at	-0.867931	1.79497	-9.67913	5.98289e-11	8.73128e-09	15.0289	FBgn0032265	CG18301	CG18301	CG18301	34451	16298 // lipase activity // inferred from electronic annotation /// 16787 // hydrolase activity // inferred from electronic annotation /// 5515 // protein binding // inferred from physical interaction /// 3824 // catalytic activity // inferred from electronic annotation /// 16789 // carboxylic ester hydrolase activity // inferred from electronic annotation	6629 // lipid metabolism // inferred from electronic annotation /// 16042 // lipid catabolism // inferred from electronic annotation	---	IPR000073 // Alpha/beta hydrolase fold // 1.5E-13 /// IPR006693 // Ab-hydrolase associated lipase region // 2.9E-30
7309	148508_at	-0.54202	-0.00111911	-9.67343	6.06722e-11	8.76306e-09	15.0151	FBgn0052057	CG32057	dpr10	dpr10	39180	---	7275 // development // inferred from electronic annotation	5576 // extracellular region // inferred from electronic annotation	IPR007110 // Immunoglobulin-like // 0.0084 /// IPR007110 // Immunoglobulin-like // 2.8E-6
5504	146703_at	-0.616408	-0.803741	-9.64923	6.4393e-11	9.02146e-09	14.9564	FBgn0050158	CG30158	CG30158	CG30158	50149	3924 // GTPase activity // inferred from electronic annotation /// 5525 // GTP binding // inferred from sequence or structural similarity /// 166 // nucleotide binding // inferred from electronic annotation /// 5525 // GTP binding // inferred from electronic annotation /// 5525 // GTP binding // inferred from sequence similarity	7263 // nitric oxide mediated signal transduction // inferred from electronic annotation /// 7264 // small GTPase mediated signal transduction // inferred from electronic annotation /// 15031 // protein transport // inferred from electronic annotation	16020 // membrane // inferred from electronic annotation	IPR001806 // Ras GTPase superfamily // 2.8E-36
11243	152442_at	-1.01454	1.96775	-9.65208	6.39435e-11	9.02146e-09	14.9633	FBgn0051233	CG31233	CG31233	CG31233	42557	4179 // membrane alanyl aminopeptidase activity // inferred from sequence or structural similarity /// 4179 // membrane alanyl aminopeptidase activity // inferred from electronic annotation /// 4179 // membrane alanyl aminopeptidase activity // inferred from sequence similarity	6508 // proteolysis // inferred from electronic annotation	---	IPR001930 // Peptidase M1, membrane alanine aminopeptidase // 1.0E-126
8130	149329_at	-0.533513	0.496001	-9.62891	6.76954e-11	9.39022e-09	14.9072	FBgn0037323	CG2663	CG2663	CG2663	40649	5386 // carrier activity // inferred from electronic annotation /// 8431 // vitamin E binding // inferred from sequence or structural similarity /// 5215 // transporter activity // inferred from electronic annotation /// 8431 // vitamin E binding // inferred from sequence similarity	6732 // coenzyme metabolism // inferred from electronic annotation /// 6810 // transport // inferred from electronic annotation /// 51189 // prosthetic group metabolism // inferred from electronic annotation	5622 // intracellular // inferred from electronic annotation	IPR001251 // Cellular retinaldehyde-binding)/triple function, C-terminal // 6.5E-14 /// IPR001251 // Cellular retinaldehyde-binding)/triple function, C-terminal // 6.5E-14
4615	145814_at	-1.04357	2.53726	-9.60966	7.09857e-11	9.75009e-09	14.8604	FBgn0031691	CG14034	CG14034	CG14034	33751	4620 // phospholipase activity // inferred from sequence or structural similarity /// 3824 // catalytic activity // inferred from electronic annotation /// 4620 // phospholipase activity // inferred from sequence similarity	6629 // lipid metabolism // inferred from electronic annotation /// 6644 // phospholipid metabolism // inferred from sequence or structural similarity /// 6644 // phospholipid metabolism // inferred from sequence similarity	---	IPR000734 // Lipase // 4.9E-30
1751	142950_at	-1.65298	2.6682	-9.5921	7.41275e-11	9.98583e-09	14.8177	FBgn0028533	CG7953	CG7953	CG7953	34801	---	---	---	---
6303	147502_at	-0.524207	0.802743	-9.59334	7.39006e-11	9.98583e-09	14.8207	FBgn0034454	CG15120	CG15120	CG15120	37248	---	---	---	---
8808	150007_at	-0.649521	0.711113	-9.58559	7.53289e-11	1.0051e-08	14.8019	FBgn0038419	CG14879	CG14879	CG14879	41982	5529 // sugar binding // inferred from electronic annotation	---	---	---
4904	146103_at	-1.32994	2.63932	-9.57273	7.77597e-11	1.02775e-08	14.7705	FBgn0032144	CG17633	CG17633	CG17633	34297	4182 // carboxypeptidase A activity // inferred from sequence or structural similarity /// 4180 // carboxypeptidase activity // inferred from electronic annotation /// 4182 // carboxypeptidase A activity // inferred from electronic annotation /// 4182 // carboxypeptidase A activity // inferred from sequence similarity	6508 // proteolysis // inferred from electronic annotation	---	IPR000834 // Peptidase M14, carboxypeptidase A // 3.8E-83
227	141426_at	-1.12059	2.25709	-9.56617	7.90298e-11	1.03477e-08	14.7546	FBgn0036996	CG5932	CG5932	CG5932	40267	4806 // triacylglycerol lipase activity // inferred from sequence or structural similarity /// 3824 // catalytic activity // inferred from electronic annotation /// 16789 // carboxylic ester hydrolase activity // inferred from electronic annotation /// 4806 // triacylglycerol lipase activity // inferred from sequence similarity	6629 // lipid metabolism // inferred from electronic annotation /// 16042 // lipid catabolism // inferred from electronic annotation	---	IPR000073 // Alpha/beta hydrolase fold // 2.2E-14 /// IPR006693 // Ab-hydrolase associated lipase region // 1.1E-21
3513	144712_at	-0.865445	1.4652	-9.51699	8.92578e-11	1.15787e-08	14.6346	FBgn0041629	CG1787	Hexo2	Hexosaminidase 2	31808	4563 // beta-N-acetylhexosaminidase activity // inferred from sequence or structural similarity /// 16799 // hydrolase activity, hydrolyzing N-glycosyl compounds // inferred from electronic annotation /// 4563 // beta-N-acetylhexosaminidase activity // inferred from electronic annotation /// 4563 // beta-N-acetylhexosaminidase activity // inferred from sequence similarity	5976 // polysaccharide metabolism // inferred from electronic annotation /// 5975 // carbohydrate metabolism // inferred from electronic annotation	---	IPR001540 // Glycoside hydrolase, family 20 // 1.4E-95 /// IPR001540 // Glycoside hydrolase, family 20 // 1.7E-10
4064	145263_at	-0.689946	0.985555	-9.50431	9.21082e-11	1.16756e-08	14.6036	FBgn0030872	CG6492	Ucp4A	Ucp4A	32764	5386 // carrier activity // inferred from sequence or structural similarity /// 5488 // binding // inferred from electronic annotation /// 17077 // oxidative phosphorylation uncoupler activity // inferred from sequence or structural similarity /// 5215 // transporter activity // inferred from electronic annotation /// 5386 // carrier activity // inferred from sequence similarity /// 17077 // oxid…	6839 // mitochondrial transport // inferred from electronic annotation /// 15992 // proton transport // inferred from sequence or structural similarity /// 6810 // transport // inferred from electronic annotation /// 15992 // proton transport // inferred from sequence similarity	5740 // mitochondrial envelope // inferred from sequence or structural similarity /// 5743 // mitochondrial inner membrane // inferred from sequence or structural similarity /// 5739 // mitochondrion // inferred from electronic annotation /// 5743 // mitochondrial inner membrane // inferred from electronic annotation /// 16020 // membrane // inferred from electronic annotation /// 16021 // integr…	IPR001993 // Mitochondrial substrate carrier // 3.3E-23 /// IPR001993 // Mitochondrial substrate carrier // 8.9E-27 /// IPR001993 // Mitochondrial substrate carrier // 1.7E-29
7054	148253_at	-1.64995	4.64296	-9.50658	9.15907e-11	1.16756e-08	14.6092	FBgn0035664	CG6467	Jon65Aiv	Jonah 65Aiv	38682	4252 // serine-type endopeptidase activity // inferred from sequence or structural similarity /// 4263 // chymotrypsin activity // non-traceable author statement /// 4295 // trypsin activity // inferred from electronic annotation /// 5515 // protein binding // inferred from physical interaction /// 4252 // serine-type endopeptidase activity // inferred from electronic annotation /// 8233 // pepti…	6508 // proteolysis // non-traceable author statement /// 6508 // proteolysis // inferred from electronic annotation	---	IPR001254 // Peptidase S1, chymotrypsin // 6.5E-70
9990	151189_at	-0.68893	-0.387567	-9.3846	1.24057e-10	1.51133e-08	14.31	FBgn0040712	CG15411	CG15411	CG15411	50185	---	---	---	---
9890	151089_at	-0.881361	0.000553923	-9.37544	1.26927e-10	1.53298e-08	14.2874	FBgn0053970	---	CG33970	CG33970	43186	166 // nucleotide binding // inferred from electronic annotation /// 5215 // transporter activity // inferred from sequence or structural similarity /// 5524 // ATP binding // inferred from electronic annotation /// 42626 // ATPase activity, coupled to transmembrane movement of substances // inferred from sequence or structural similarity /// 16887 // ATPase activity // inferred from electronic a…	6810 // transport // inferred from sequence or structural similarity /// 6810 // transport // inferred from electronic annotation /// 6810 // transport // inferred from sequence similarity	16020 // membrane // inferred from electronic annotation /// 43190 // ATP-binding cassette (ABC) transporter complex // inferred from sequence or structural similarity /// 43190 // ATP-binding cassette (ABC) transporter complex // inferred from sequence similarity	---
11284	152483_at	-0.650429	5.13612	-9.33658	1.39872e-10	1.64673e-08	14.1916	FBgn0035915	CG6372	CG6372	CG6372	38986	4178 // leucyl aminopeptidase activity // inferred from sequence or structural similarity /// 4177 // aminopeptidase activity // inferred from electronic annotation /// 4178 // leucyl aminopeptidase activity // inferred from sequence similarity	6508 // proteolysis // inferred from electronic annotation	5622 // intracellular // inferred from electronic annotation	IPR008283 // Peptidase M17, cytosol aminopeptidase, N-terminal // 7.1E-54 /// IPR000819 // Peptidase M17, cytosol aminopeptidase, C-terminal // 1.5E-93
108	141307_at	-0.456821	1.93679	-9.25733	1.7061e-10	1.93094e-08	13.9956	FBgn0034225	CG4827	CG4827	CG4827	36968	8253 // 5'-nucleotidase activity // inferred from sequence or structural similarity /// 166 // nucleotide binding // inferred from electronic annotation /// 16787 // hydrolase activity // inferred from electronic annotation /// 16788 // hydrolase activity, acting on ester bonds // inferred from electronic annotation /// 46872 // metal ion binding // inferred from electronic annotation /// 8253 //…	6139 // nucleobase, nucleoside, nucleotide and nucleic acid metabolism // inferred from electronic annotation /// 9166 // nucleotide catabolism // inferred from electronic annotation	---	IPR004843 // Metallo-phosphoesterase // 6.7E-19 /// IPR008334 // 5-Nucleotidase, C-terminal // 1.8E-62
2627	143826_at	-0.9619	3.28914	-9.21228	1.91079e-10	2.14161e-08	13.8838	FBgn0015585	CG10852	Acp63F	Accessory gland peptide 63F	38448	---	7582 // physiological process // non-traceable author statement /// 45297 // post-mating behavior // non-traceable author statement /// 7610 // behavior // inferred from electronic annotation	---	---
5421	146620_s_at	-0.883262	3.937	-9.15631	2.20044e-10	2.42742e-08	13.7445	FBgn0025814 /// FBgn0035793	CG1742	Mgstl /// CG7546	Microsomal glutathione S-transferase-like /// CG7546	38844 /// 44110	4364 // glutathione transferase activity // inferred from sequence or structural similarity /// 16740 // transferase activity // inferred from electronic annotation /// 4364 // glutathione transferase activity // inferred from sequence similarity	6464 // protein modification // inferred from electronic annotation /// 6952 // defense response // inferred from electronic annotation /// 9636 // response to toxin // inferred from electronic annotation	5741 // mitochondrial outer membrane // inferred from sequence or structural similarity /// 5792 // microsome // inferred from sequence or structural similarity /// 5741 // mitochondrial outer membrane // inferred from sequence similarity /// 5792 // microsome // inferred from sequence similarity	IPR001129 // Membrane-associated proteins in eicosanoid and glutathione metabolism (MAPEG) // 1.3E-66 /// IPR001129 // Membrane-associated proteins in eicosanoid and glutathione metabolism (MAPEG) // 1.7E-52
6989	148188_at	-0.984854	0.584194	-9.15807	2.19069e-10	2.42742e-08	13.7489	FBgn0052245	CG32245	CG32245	CG32245	38562	5200 // structural constituent of cytoskeleton // inferred from electronic annotation	7010 // cytoskeleton organization and biogenesis // inferred from electronic annotation	16020 // membrane // inferred from sequence or structural similarity /// 16020 // membrane // inferred from electronic annotation /// 16020 // membrane // inferred from sequence similarity	IPR001107 // Band 7 protein // 3.5E-85
6598	147797_at	-0.673543	1.33895	-9.14269	2.27748e-10	2.49277e-08	13.7106	FBgn0050183	CG30183	CG30183	CG30183	37749	---	---	---	IPR001849 // Pleckstrin-like // 9.6E-10
10594	151793_at	-1.4641	4.72148	-9.11583	2.43752e-10	2.61796e-08	13.6435	FBgn0035665	CG6483	Jon65Aiii	Jonah 65Aiii	38683	4252 // serine-type endopeptidase activity // inferred from sequence or structural similarity /// 4263 // chymotrypsin activity // inferred from electronic annotation /// 4295 // trypsin activity // inferred from electronic annotation /// 42708 // elastase activity // non-traceable author statement /// 5515 // protein binding // inferred from physical interaction /// 4252 // serine-type endopepti…	6508 // proteolysis // non-traceable author statement /// 6508 // proteolysis // inferred from electronic annotation	---	IPR001254 // Peptidase S1, chymotrypsin // 2.2E-56
11314	152513_at	-0.977993	2.67424	-9.09613	2.56218e-10	2.69896e-08	13.5943	FBgn0039311	CG10513	CG10513	CG10513	43051	16301 // kinase activity // inferred from electronic annotation /// 16740 // transferase activity // inferred from electronic annotation	---	---	IPR004119 // Protein of unknown function DUF227 // 5.7E-122
2090	143289_at	-0.782215	4.58053	-9.07064	2.73323e-10	2.85765e-08	13.5305	FBgn0003034	CG17673	Acp70A	Accessory gland peptide 70A	39494	5179 // hormone activity // non-traceable author statement /// 5515 // protein binding // inferred from physical interaction	6718 // juvenile hormone biosynthesis // non-traceable author statement /// 7557 // regulation of juvenile hormone biosynthesis // traceable author statement /// 7621 // negative regulation of female receptivity // non-traceable author statement /// 7621 // negative regulation of female receptivity // traceable author statement /// 9993 // oogenesis (sensu Insecta) // traceable author statement /…	5576 // extracellular region // non-traceable author statement /// 5576 // extracellular region // traceable author statement	---
8162	149361_at	-0.564369	0.071698	-9.06768	2.75381e-10	2.85784e-08	13.5231	FBgn0037394	CG14678	CG14678	CG14678	40736	---	---	---	IPR007110 // Immunoglobulin-like // 0.0017 /// IPR007110 // Immunoglobulin-like // 3.7E-5
4054	145253_at	-0.948412	1.93527	-9.05558	2.83968e-10	2.92528e-08	13.4928	FBgn0030859	CG12990	CG12990	CG12990	32747	16747 // transferase activity, transferring groups other than amino-acyl groups // inferred from electronic annotation	---	---	---
2139	143338_f_at	-1.84659	5.2732	-9.03845	2.96594e-10	3.01108e-08	13.4498	FBgn0003356 /// FBgn0003357	CG31362 /// CG31034	Jon99Cii /// Jon99Ciii	Jonah 99Cii /// Jonah 99Ciii	43543 /// 43544	4252 // serine-type endopeptidase activity // inferred from sequence or structural similarity /// 4252 // serine-type endopeptidase activity // non-traceable author statement /// 4263 // chymotrypsin activity // non-traceable author statement /// 4295 // trypsin activity // inferred from electronic annotation /// 8236 // serine-type peptidase activity // non-traceable author statement /// 5515 //…	6508 // proteolysis // non-traceable author statement /// 7586 // digestion // non-traceable author statement /// 6508 // proteolysis // inferred from electronic annotation	---	IPR001254 // Peptidase S1, chymotrypsin // 1.1E-57 /// IPR001254 // Peptidase S1, chymotrypsin // 1.2E-22
11066	152265_at	-1.02032	2.63127	-9.02496	3.06939e-10	3.07158e-08	13.416	FBgn0039313	CG11892	CG11892	CG11892	43053	5515 // protein binding // inferred from physical interaction /// 16301 // kinase activity // inferred from electronic annotation /// 16740 // transferase activity // inferred from electronic annotation	---	---	IPR004119 // Protein of unknown function DUF227 // 5.1E-119
1755	142954_at	-1.00255	2.51996	-8.9279	3.93097e-10	3.76509e-08	13.1717	FBgn0034290	CG5773	CG5773	CG5773	37053	---	---	---	---
6205	147404_at	-0.609045	-0.0561695	-8.92596	3.95052e-10	3.76509e-08	13.1668	---	---	---	---	---	---	---	---	---
6932	148131_at	-0.710564	0.686497	-8.92947	3.9152e-10	3.76509e-08	13.1756	FBgn0035475	CG10866	CG10866	CG10866	38461	---	---	---	---
8848	150047_at	-0.483928	0.339406	-8.92699	3.94007e-10	3.76509e-08	13.1694	FBgn0038477	CG5169	CG5169	CG5169	42064	4702 // receptor signaling protein serine/threonine kinase activity // non-traceable author statement /// 4713 // protein-tyrosine kinase activity // inferred from electronic annotation /// 5524 // ATP binding // inferred from electronic annotation /// 166 // nucleotide binding // inferred from electronic annotation /// 4672 // protein kinase activity // inferred from electronic annotation /// 46…	6468 // protein amino acid phosphorylation // non-traceable author statement /// 6917 // induction of apoptosis // inferred from electronic annotation /// 7015 // actin filament organization // inferred from mutant phenotype /// 7242 // intracellular signaling cascade // inferred from electronic annotation /// 6468 // protein amino acid phosphorylation // inferred from electronic annotation	---	IPR000719 // Protein kinase // 8.0E-97
2425	143624_at	-1.31482	3.06914	-8.86298	4.64146e-10	4.30642e-08	13.0076	FBgn0010425	CG18681	Try	Trypsin	49080	4263 // chymotrypsin activity // inferred from electronic annotation /// 4295 // trypsin activity // non-traceable author statement /// 4252 // serine-type endopeptidase activity // inferred from electronic annotation	6508 // proteolysis // non-traceable author statement /// 6508 // proteolysis // inferred from electronic annotation	5576 // extracellular region // non-traceable author statement	IPR001254 // Peptidase S1, chymotrypsin // 5.6E-86
1506	142705_at	-0.670154	3.44765	-8.84671	4.83928e-10	4.40248e-08	12.9663	FBgn0002284	CG4097	Pros26	Proteasome 26kD subunit	39855	4175 // endopeptidase activity // inferred from sequence or structural similarity /// 4175 // endopeptidase activity // non-traceable author statement /// 5515 // protein binding // inferred from physical interaction /// 4175 // endopeptidase activity // inferred from electronic annotation /// 4298 // threonine endopeptidase activity // inferred from electronic annotation /// 8233 // peptidase ac…	6510 // ATP-dependent proteolysis // non-traceable author statement /// 6511 // ubiquitin-dependent protein catabolism // non-traceable author statement /// 6511 // ubiquitin-dependent protein catabolism // inferred from electronic annotation	502 // proteasome complex (sensu Eukaryota) // non-traceable author statement /// 5839 // proteasome core complex (sensu Eukaryota) // inferred from sequence or structural similarity /// 5839 // proteasome core complex (sensu Eukaryota) // non-traceable author statement /// 5829 // cytosol // inferred from electronic annotation /// 5839 // proteasome core complex (sensu Eukaryota) // inferred fro…	IPR001353 // Peptidase T1, 20S proteasome // 1.4E-38
2210	143409_at	-0.742732	0.181179	-8.83696	4.96196e-10	4.45622e-08	12.9416	FBgn0003995	CG10037	vvl	ventral veins lacking	38752	3677 // DNA binding // non-traceable author statement /// 3700 // transcription factor activity // traceable author statement /// 3702 // RNA polymerase II transcription factor activity // inferred from sequence or structural similarity /// 5515 // protein binding // traceable author statement /// 3677 // DNA binding // inferred from electronic annotation /// 3700 // transcription factor activity…	6355 // regulation of transcription, DNA-dependent // non-traceable author statement /// 6357 // regulation of transcription from RNA polymerase II promoter // inferred from electronic annotation /// 7398 // ectoderm development // inferred from electronic annotation /// 7422 // peripheral nervous system development // inferred from mutant phenotype /// 7422 // peripheral nervous system developme…	5634 // nucleus // inferred from sequence or structural similarity /// 5634 // nucleus // non-traceable author statement /// 5634 // nucleus // inferred from electronic annotation /// 5634 // nucleus // inferred from sequence similarity	IPR001356 // Homeobox // 2.0E-24 /// IPR000327 // POU domain // 6.5E-55
9326	150525_at	-0.519548	0.057834	-8.79454	5.53342e-10	4.87567e-08	12.8339	FBgn0039225	CG6892	Ets96B	Ets96B	42952	3677 // DNA binding // inferred from sequence or structural similarity /// 3700 // transcription factor activity // inferred from sequence or structural similarity /// 3677 // DNA binding // inferred from electronic annotation /// 3700 // transcription factor activity // inferred from electronic annotation /// 43565 // sequence-specific DNA binding // inferred from electronic annotation /// 3677 …	165 // MAPKKK cascade // inferred from electronic annotation /// 6355 // regulation of transcription, DNA-dependent // inferred from sequence or structural similarity /// 6357 // regulation of transcription from RNA polymerase II promoter // inferred from electronic annotation /// 7498 // mesoderm development // inferred from electronic annotation /// 30097 // hemopoiesis // inferred from electro…	5634 // nucleus // inferred from sequence or structural similarity /// 5634 // nucleus // inferred from electronic annotation /// 5634 // nucleus // inferred from sequence similarity	IPR000418 // Ets-domain // 2.5E-56 /// IPR000418 // Ets-domain // 2.5E-56
8269	149468_at	-0.754765	0.856932	-8.78379	5.68858e-10	4.98106e-08	12.8066	FBgn0037534	CG2781	CG2781	CG2781	40943	3843 // 1,3-beta-glucan synthase activity // inferred from sequence or structural similarity /// 8415 // acyltransferase activity // inferred from electronic annotation /// 9922 // fatty acid elongase activity // inferred from sequence or structural similarity /// 3843 // 1,3-beta-glucan synthase activity // inferred from sequence similarity /// 9922 // fatty acid elongase activity // inferred fr…	6631 // fatty acid metabolism // inferred from electronic annotation /// 30497 // fatty acid elongation // inferred from sequence or structural similarity /// 42761 // very-long-chain fatty acid biosynthesis // inferred from sequence or structural similarity /// 30497 // fatty acid elongation // inferred from sequence similarity /// 42761 // very-long-chain fatty acid biosynthesis // inferred fro…	16021 // integral to membrane // inferred from electronic annotation	---
7954	149153_at	-0.583307	0.782895	-8.76233	6.01192e-10	5.23149e-08	12.752	FBgn0052432	CG32432	CG32432	CG32432	40310	5179 // hormone activity // inferred from electronic annotation /// 5515 // protein binding // inferred from physical interaction	---	5576 // extracellular region // inferred from electronic annotation	IPR002172 // Low density lipoprotein-receptor, class A // 6.3E-16 /// IPR000859 // CUB // 3.1E-6 /// IPR000859 // CUB // 7.6E-5
1746	142945_at	-0.507855	0.215078	-8.75689	6.09677e-10	5.24488e-08	12.7381	FBgn0003189	CG18572	r	rudimentary	32640	3700 // transcription factor activity // inferred from electronic annotation /// 4049 // anthranilate synthase activity // inferred from electronic annotation /// 4070 // aspartate carbamoyltransferase activity // inferred from sequence or structural similarity /// 4087 // carbamoyl-phosphate synthase (ammonia) activity // inferred from sequence or structural similarity /// 4151 // dihydroorotase…	6207 // 'de novo' pyrimidine base biosynthesis // non-traceable author statement /// 6355 // regulation of transcription, DNA-dependent // inferred from electronic annotation /// 6526 // arginine biosynthesis // inferred from electronic annotation /// 6807 // nitrogen compound metabolism // inferred from electronic annotation /// 8652 // amino acid biosynthesis // inferred from electronic annotat…	5737 // cytoplasm // non-traceable author statement /// 9347 // aspartate carbamoyltransferase complex // inferred from electronic annotation /// 5737 // cytoplasm // inferred from electronic annotation	IPR005481 // Carbamoyl-phosphate synthetase large chain, N-terminal // 4.6E-67 /// IPR005481 // Carbamoyl-phosphate synthetase large chain, N-terminal // 4.3E-9 /// IPR005479 // Carbamoyl-phosphate synthase L chain, ATP-binding // 1.0E-126 /// IPR002474 // Carbamoyl-phosphate synthase, small chain // 1.6E-87 /// IPR006132 // Aspartate/ornithine carbamoyltransferase, carbamoyl-P binding domain // …
7429	148628_at	-0.764372	0.71623	-8.75655	6.10218e-10	5.24488e-08	12.7373	FBgn0041096	CG32096	rols	rolling pebbles	39368	3824 // catalytic activity // inferred from electronic annotation /// 4842 // ubiquitin-protein ligase activity // inferred from electronic annotation /// 5057 // receptor signaling protein activity // inferred from electronic annotation /// 5102 // receptor binding // inferred from electronic annotation /// 5515 // protein binding // inferred from physical interaction /// 8270 // zinc ion bindin…	7520 // myoblast fusion // inferred from mutant phenotype /// 7520 // myoblast fusion // non-traceable author statement /// 7520 // myoblast fusion // traceable author statement /// 8283 // cell proliferation // inferred from electronic annotation /// 16567 // protein ubiquitination // inferred from electronic annotation /// 7186 // G-protein coupled receptor protein signaling pathway // inferred…	151 // ubiquitin ligase complex // inferred from electronic annotation /// 5737 // cytoplasm // inferred from direct assay /// 16021 // integral to membrane // inferred from electronic annotation	IPR002110 // Ankyrin // 1.1 /// IPR002110 // Ankyrin // 0.0037 /// IPR002110 // Ankyrin // 5.2E-7 /// IPR002110 // Ankyrin // 0.065 /// IPR002110 // Ankyrin // 2.3E-6 /// IPR002110 // Ankyrin // 1.6E-5 /// IPR002110 // Ankyrin // 6.7E-8 /// IPR002110 // Ankyrin // 1.9E-7 /// IPR002110 // Ankyrin // 1.4E-5 /// IPR002110 // Ankyrin // 0.021 /// IPR002110 // Ankyrin // 1.1 /// IPR002110 // Ankyrin /…
6128	147327_at	-1.06303	5.09981	-8.74108	6.35047e-10	5.425e-08	12.6978	FBgn0034152	CG8626	Acp53C14a	Acp53C14a	36872	---	---	---	IPR009392 // Drosophila ACP53EA // 3.2E-11
13642	154841_at	-0.570474	2.11211	-8.73414	6.46517e-10	5.48952e-08	12.6802	FBgn0030435	CG4645	CG4645	CG4645	32244	---	---	---	IPR006977 // Protein of unknown function DUF649 // 2.0E-71
2140	143339_i_at	-1.47495	6.23047	-8.72938	6.54514e-10	5.52394e-08	12.668	FBgn0003357	CG31362	Jon99Ciii	Jonah 99Ciii	43543	4252 // serine-type endopeptidase activity // inferred from sequence or structural similarity /// 4252 // serine-type endopeptidase activity // non-traceable author statement /// 4263 // chymotrypsin activity // non-traceable author statement /// 4295 // trypsin activity // inferred from electronic annotation /// 8236 // serine-type peptidase activity // non-traceable author statement /// 4252 //…	6508 // proteolysis // non-traceable author statement /// 7586 // digestion // non-traceable author statement /// 6508 // proteolysis // inferred from electronic annotation	---	IPR001254 // Peptidase S1, chymotrypsin // 1.1E-57
2193	143392_r_at	-0.788445	1.2971	-8.71818	6.73703e-10	5.6182e-08	12.6395	FBgn0003888	CG3401	Tub60D	Tubulin at 60D	37888	3924 // GTPase activity // inferred from electronic annotation /// 5200 // structural constituent of cytoskeleton // inferred from sequence or structural similarity /// 5525 // GTP binding // non-traceable author statement /// 15631 // tubulin binding // inferred from electronic annotation /// 5515 // protein binding // inferred from physical interaction /// 166 // nucleotide binding // inferred …	6886 // intracellular protein transport // inferred from electronic annotation /// 7017 // microtubule-based process // inferred from sequence or structural similarity /// 7018 // microtubule-based movement // inferred from electronic annotation /// 7059 // chromosome segregation // inferred from electronic annotation /// 7067 // mitosis // inferred from electronic annotation /// 7409 // axonogen…	5874 // microtubule // inferred from direct assay /// 5874 // microtubule // inferred from sequence or structural similarity /// 5874 // microtubule // non-traceable author statement /// 45298 // tubulin // non-traceable author statement /// 5874 // microtubule // inferred from electronic annotation /// 43234 // protein complex // inferred from electronic annotation /// 5874 // microtubule // inf…	IPR003008 // Tubulin/FtsZ, GTPase // 2.6E-105 /// IPR008280 // Tubulin/FtsZ, C-terminal // 6.7E-81
4142	145341_i_at	-0.694856	1.0502	-8.70613	6.95005e-10	5.72766e-08	12.6087	FBgn0030981	CG14191	CG14191	CG14191	32893	---	---	---	---
9573	150772_at	-0.596602	0.384573	-8.70708	6.93314e-10	5.72766e-08	12.6111	FBgn0039579	CG14065	CG14065	CG14065	43372	---	---	---	---
7441	148640_at	-0.458707	-0.177017	-8.65376	7.95867e-10	6.52053e-08	12.4748	FBgn0036264	CG11529	CG11529	CG11529	39395	4252 // serine-type endopeptidase activity // inferred from sequence or structural similarity /// 4263 // chymotrypsin activity // non-traceable author statement /// 4295 // trypsin activity // inferred from electronic annotation /// 4252 // serine-type endopeptidase activity // inferred from sequence similarity	6508 // proteolysis // non-traceable author statement	---	IPR001254 // Peptidase S1, chymotrypsin // 1.1E-64
3161	144360_at	-0.593414	0.976466	-8.63823	8.28563e-10	6.63324e-08	12.435	FBgn0052815	CG32815	CG32815	CG32815	318224	---	---	---	---
9942	151141_at	-0.479	0.670775	-8.64198	8.20554e-10	6.63324e-08	12.4446	FBgn0040658	---	CG13516	CG13516	3885599	---	---	---	---
10741	151940_at	-0.684503	2.00936	-8.63496	8.35606e-10	6.65161e-08	12.4266	FBgn0034844	CG9861	CG9861	CG9861	37692	---	---	---	---
4035	145234_at	-0.892469	1.42211	-8.63237	8.41248e-10	6.65869e-08	12.42	FBgn0030827	CG18258	CG18258	CG18258	32708	16298 // lipase activity // inferred from electronic annotation /// 16787 // hydrolase activity // inferred from electronic annotation /// 3824 // catalytic activity // inferred from electronic annotation	6629 // lipid metabolism // inferred from electronic annotation /// 6644 // phospholipid metabolism // inferred from electronic annotation /// 7275 // development // inferred from electronic annotation /// 7276 // gametogenesis // inferred from electronic annotation /// 7292 // female gamete generation // inferred from electronic annotation	---	IPR000734 // Lipase // 7.4E-40
9516	150715_at	-0.602827	0.641779	-8.6216	8.65082e-10	6.77084e-08	12.3924	FBgn0039492	CG6051	CG6051	CG6051	43271	8270 // zinc ion binding // inferred from electronic annotation	---	---	IPR000306 // Zn-finger, FYVE type // 1.3E-28 /// IPR000306 // Zn-finger, FYVE type // 1.3E-28
7831	149030_at	-0.657291	0.291451	-8.61849	8.721e-10	6.78784e-08	12.3844	FBgn0036844	CG14080	Mkp3	Mitogen-activated protein kinase phosphatase 3	40081	8138 // protein tyrosine/serine/threonine phosphatase activity // inferred from sequence or structural similarity /// 8138 // protein tyrosine/serine/threonine phosphatase activity // non-traceable author statement /// 16791 // phosphoric monoester hydrolase activity // inferred from direct assay /// 17017 // MAP kinase phosphatase activity // inferred from sequence or structural similarity /// 1…	165 // MAPKKK cascade // inferred from electronic annotation /// 6096 // glycolysis // inferred from electronic annotation /// 6470 // protein amino acid dephosphorylation // inferred from direct assay /// 6470 // protein amino acid dephosphorylation // non-traceable author statement /// 6470 // protein amino acid dephosphorylation // inferred from electronic annotation	5737 // cytoplasm // inferred from direct assay	IPR001763 // Rhodanese-like // 1.5E-9 /// IPR000340 // Dual specificity protein phosphatase // 1.2E-58
7572	148771_at	-0.444996	0.408281	-8.60909	8.93639e-10	6.87906e-08	12.3603	FBgn0036456	CG13466	CG13466	CG13466	39618	5200 // structural constituent of cytoskeleton // inferred from electronic annotation /// 8017 // microtubule binding // inferred from sequence or structural similarity /// 8017 // microtubule binding // non-traceable author statement /// 8017 // microtubule binding // inferred from sequence similarity	7017 // microtubule-based process // non-traceable author statement /// 7067 // mitosis // inferred from electronic annotation /// 7242 // intracellular signaling cascade // inferred from electronic annotation	5874 // microtubule // inferred from electronic annotation	IPR003533 // Doublecortin // 3.4E-5 /// IPR005108 // HELP domain // 5.1E-44 /// IPR001680 // G-protein beta WD-40 repeat // 0.0016 /// IPR001680 // G-protein beta WD-40 repeat // 0.094 /// IPR001680 // G-protein beta WD-40 repeat // 5.7E-5 /// IPR001680 // G-protein beta WD-40 repeat // 0.03 /// IPR001680 // G-protein beta WD-40 repeat // 1.2 /// IPR001680 // G-protein beta WD-40 repeat // 0.6
5466	146665_at	-0.492542	-0.809462	-8.59778	9.20277e-10	7.02982e-08	12.3312	FBgn0033052	CG33131	SCAP	SCAP	35529	---	42 // protein targeting to Golgi // non-traceable author statement /// 16485 // protein processing // non-traceable author statement /// 35103 // sterol regulatory element binding-protein cleavage // inferred from sequence or structural similarity /// 35103 // sterol regulatory element binding-protein cleavage // non-traceable author statement /// 35103 // sterol regulatory element binding-protei…	5795 // Golgi stack // inferred from electronic annotation /// 16021 // integral to membrane // inferred from electronic annotation	IPR001680 // G-protein beta WD-40 repeat // 1.7E-5 /// IPR001680 // G-protein beta WD-40 repeat // 0.014 /// IPR001680 // G-protein beta WD-40 repeat // 1.4E-5 /// IPR001680 // G-protein beta WD-40 repeat // 1.1E-5 /// IPR001680 // G-protein beta WD-40 repeat // 5.0E-7
6707	147906_at	-0.708009	1.07091	-8.58632	9.48113e-10	7.14143e-08	12.3018	FBgn0035094	CG9380	CG9380	CG9380	38011	---	---	---	---
3215	144414_at	-0.543597	1.29625	-8.57508	9.76226e-10	7.31386e-08	12.2729	FBgn0040335	CG10260	CG10260	CG10260	31247	4430 // 1-phosphatidylinositol 4-kinase activity // inferred from sequence or structural similarity /// 4430 // 1-phosphatidylinositol 4-kinase activity // non-traceable author statement /// 4428 // inositol or phosphatidylinositol kinase activity // inferred from electronic annotation /// 16301 // kinase activity // inferred from electronic annotation /// 16740 // transferase activity // inferre…	7242 // intracellular signaling cascade // inferred from electronic annotation /// 16310 // phosphorylation // non-traceable author statement	---	IPR000403 // Phosphatidylinositol 3- and 4-kinase // 4.0E-72 /// IPR001263 // Phosphoinositide 3-kinase accessory domain PIK // 2.3E-25
5630	146829_at	-0.540545	0.692803	-8.56601	9.99531e-10	7.44863e-08	12.2496	FBgn0033324	CG14744	CG14744	CG14744	35858	---	---	16021 // integral to membrane // inferred from electronic annotation	IPR004837 // Sodium/calcium exchanger membrane region // 3.4E-23 /// IPR004837 // Sodium/calcium exchanger membrane region // 1.4E-25
5477	146676_at	-0.675953	1.15815	-8.56363	1.00573e-09	7.45099e-08	12.2435	FBgn0050431	CG30431	CG30431	CG30431	35549	3676 // nucleic acid binding // inferred from sequence or structural similarity /// 8270 // zinc ion binding // inferred from electronic annotation /// 30528 // transcription regulator activity // inferred from electronic annotation /// 5515 // protein binding // inferred from physical interaction /// 3676 // nucleic acid binding // inferred from electronic annotation /// 46872 // metal ion bindi…	6357 // regulation of transcription from RNA polymerase II promoter // inferred from electronic annotation /// 8283 // cell proliferation // inferred from electronic annotation	5634 // nucleus // inferred from electronic annotation	IPR007087 // Zn-finger, C2H2 type // 3.2E-5 /// IPR007087 // Zn-finger, C2H2 type // 4.5E-5 /// IPR007087 // Zn-finger, C2H2 type // 8.2E-5 /// IPR007087 // Zn-finger, C2H2 type // 8.6E-5
3560	144759_at	-0.47082	0.526023	-8.54561	1.05404e-09	7.73148e-08	12.1971	FBgn0052700	CG32700	CG32700	CG32700	31896	16491 // oxidoreductase activity // inferred from electronic annotation /// 5515 // protein binding // inferred from physical interaction	8152 // metabolism // inferred from electronic annotation	---	---
13702	154901_at	-0.431331	2.09219	-8.53238	1.09103e-09	7.91988e-08	12.163	FBgn0036197	CG7319	CG7319	CG7319	39320	179 // rRNA (adenine-N6,N6-)-dimethyltransferase activity // inferred from electronic annotation /// 3676 // nucleic acid binding // inferred from electronic annotation /// 16433 // rRNA (adenine) methyltransferase activity // inferred from sequence or structural similarity /// 8649 // rRNA methyltransferase activity // inferred from electronic annotation /// 8757 // S-adenosylmethionine-dependen…	154 // rRNA modification // inferred from electronic annotation /// 16072 // rRNA metabolism // inferred from electronic annotation /// 6364 // rRNA processing // inferred from electronic annotation	---	IPR001737 // Ribosomal RNA adenine dimethylase // 1.2E-29 /// IPR001737 // Ribosomal RNA adenine dimethylase // 1.2E-29
1244	142443_at	-0.439028	0.155431	-8.49331	1.20809e-09	8.4627e-08	12.0622	FBgn0029979	CG10777	CG10777	CG10777	31707	3676 // nucleic acid binding // inferred from electronic annotation /// 3724 // RNA helicase activity // inferred from sequence or structural similarity /// 5524 // ATP binding // inferred from electronic annotation /// 8026 // ATP-dependent helicase activity // inferred from electronic annotation /// 5515 // protein binding // inferred from physical interaction /// 166 // nucleotide binding // i…	6139 // nucleobase, nucleoside, nucleotide and nucleic acid metabolism // inferred from electronic annotation	---	IPR001650 // Helicase, C-terminal // 3.1E-36 /// IPR001410 // DEAD/DEAH box helicase // 3.7E-82
2002	143201_at	-0.727852	0.78775	-8.49582	1.20022e-09	8.4627e-08	12.0687	FBgn0001258	CG10160	ImpL3	Ecdysone-inducible gene L3	45880	4459 // L-lactate dehydrogenase activity // inferred from sequence or structural similarity /// 4459 // L-lactate dehydrogenase activity // non-traceable author statement /// 4459 // L-lactate dehydrogenase activity // traceable author statement /// 5515 // protein binding // inferred from physical interaction /// 4459 // L-lactate dehydrogenase activity // inferred from electronic annotation ///…	6096 // glycolysis // non-traceable author statement /// 6100 // tricarboxylic acid cycle intermediate metabolism // inferred from electronic annotation /// 6096 // glycolysis // inferred from electronic annotation /// 19642 // anaerobic glycolysis // inferred from electronic annotation	5737 // cytoplasm // inferred from electronic annotation	IPR001236 // Lactate/malate dehydrogenase // 4.6E-61 /// IPR001236 // Lactate/malate dehydrogenase // 6.5E-71
6617	147816_at	-0.907206	0.606158	-8.49487	1.20318e-09	8.4627e-08	12.0663	FBgn0025698	CG5594	CG5594	CG5594	37800	5279 // amino acid-polyamine transporter activity // inferred from electronic annotation /// 8324 // cation transporter activity // inferred from electronic annotation /// 15379 // potassium:chloride symporter activity // inferred from sequence or structural similarity /// 5215 // transporter activity // inferred from electronic annotation /// 15377 // cation:chloride symporter activity // inferr…	6810 // transport // inferred from sequence or structural similarity /// 6812 // cation transport // inferred from electronic annotation /// 6814 // sodium ion transport // inferred from electronic annotation /// 6821 // chloride transport // inferred from electronic annotation /// 6865 // amino acid transport // inferred from electronic annotation /// 6810 // transport // inferred from electroni…	16021 // integral to membrane // inferred from sequence or structural similarity /// 16020 // membrane // inferred from electronic annotation /// 16021 // integral to membrane // inferred from electronic annotation /// 16021 // integral to membrane // inferred from sequence similarity	IPR004841 // Amino acid permease-associated region // 3.8E-19 /// IPR004841 // Amino acid permease-associated region // 4.2E-27 /// IPR004841 // Amino acid permease-associated region // 3.8E-19 /// IPR004841 // Amino acid permease-associated region // 4.2E-27
7881	149080_at	-0.520616	0.864036	-8.48757	1.22635e-09	8.54782e-08	12.0474	FBgn0036922	CG14182	CG14182	CG14182	40181	---	---	---	---
6087	147286_at	-0.57006	-0.08021	-8.47341	1.2726e-09	8.82627e-08	12.0108	FBgn0034092	CG7798	CG7798	CG7798	36798	3796 // lysozyme activity // inferred from sequence or structural similarity /// 3796 // lysozyme activity // non-traceable author statement /// 3796 // lysozyme activity // inferred from sequence similarity	6960 // antimicrobial humoral response (sensu Protostomia) // non-traceable author statement /// 16998 // cell wall catabolism // inferred from electronic annotation	5576 // extracellular region // inferred from electronic annotation	IPR001916 // Glycoside hydrolase, family 22 // 2.5E-46
13691	154890_at	-0.60459	2.00032	-8.46532	1.29978e-09	8.92642e-08	11.9899	FBgn0036289	CG10657	CG10657	CG10657	39423	5386 // carrier activity // inferred from electronic annotation /// 16918 // retinal binding // inferred from sequence or structural similarity /// 5515 // protein binding // inferred from physical interaction /// 5215 // transporter activity // inferred from electronic annotation /// 16918 // retinal binding // inferred from sequence similarity	6732 // coenzyme metabolism // inferred from electronic annotation /// 6810 // transport // inferred from electronic annotation /// 51189 // prosthetic group metabolism // inferred from electronic annotation	5622 // intracellular // inferred from electronic annotation	IPR001251 // Cellular retinaldehyde-binding)/triple function, C-terminal // 1.3E-10
4202	145401_at	-0.658436	0.536243	-8.45173	1.34681e-09	9.15965e-08	11.9548	FBgn0031074	CG11942	skpE	skpE	32997	16944 // RNA polymerase II transcription elongation factor activity // inferred from sequence or structural similarity /// 19237 // centromeric DNA binding // inferred from electronic annotation /// 16944 // RNA polymerase II transcription elongation factor activity // inferred from sequence similarity	6508 // proteolysis // inferred from electronic annotation /// 7059 // chromosome segregation // inferred from electronic annotation /// 7067 // mitosis // inferred from electronic annotation	---	IPR001232 // SKP1 component // 3.9E-27 /// IPR001232 // SKP1 component // 8.3E-15
7868	149067_at	-0.593329	0.280004	-8.45325	1.34147e-09	9.15965e-08	11.9587	FBgn0036897	CG8786	CG8786	CG8786	40144	5515 // protein binding // inferred from electronic annotation /// 8270 // zinc ion binding // inferred from electronic annotation /// 46872 // metal ion binding // inferred from electronic annotation	---	---	IPR001841 // Zn-finger, RING // 2.3E-7 /// IPR004170 // WWE domain // 2.5E-13
6460	147659_at	-0.730375	0.851732	-8.43986	1.38932e-09	9.40311e-08	11.9241	FBgn0034699	CG13504	CG13504	CG13504	37526	---	---	---	---
5564	146763_at	-0.455477	0.581296	-8.43307	1.41428e-09	9.44205e-08	11.9065	FBgn0033216	CG1946	CG1946	CG1946	35720	---	---	---	IPR007130 // Diacylglycerol acyltransferase // 1.0E-126
7200	148399_at	-0.43392	-0.549599	-8.42917	1.42878e-09	9.44205e-08	11.8964	FBgn0001253	CG32356	ImpE1	Ecdysone-inducible gene E1	45879	8034 // lipoprotein binding // inferred from sequence or structural similarity /// 8034 // lipoprotein binding // inferred from sequence similarity	7561 // imaginal disc eversion // traceable author statement	19898 // extrinsic to membrane // traceable author statement	IPR006149 // Nematode-specific EB region // 1.7E-23 /// IPR002172 // Low density lipoprotein-receptor, class A // 2.7E-11 /// IPR002172 // Low density lipoprotein-receptor, class A // 1.4E-6 /// IPR002172 // Low density lipoprotein-receptor, class A // 2.3E-11
8634	149833_at	-0.930173	-0.350794	-8.43319	1.41381e-09	9.44205e-08	11.9068	FBgn0052473	CG32473	CG32473	CG32473	41636	3676 // nucleic acid binding // inferred from electronic annotation /// 4179 // membrane alanyl aminopeptidase activity // inferred from electronic annotation /// 4230 // glutamyl aminopeptidase activity // inferred from sequence or structural similarity /// 4519 // endonuclease activity // inferred from electronic annotation /// 8270 // zinc ion binding // inferred from electronic annotation ///…	6508 // proteolysis // inferred from electronic annotation	---	IPR001930 // Peptidase M1, membrane alanine aminopeptidase // 1.0E-126
7764	148963_at	-1.43404	3.66247	-8.42117	1.45904e-09	9.55197e-08	11.8756	FBgn0023197	CG6298	Jon74E	Jonah 74E	39959	4263 // chymotrypsin activity // inferred from sequence or structural similarity /// 4263 // chymotrypsin activity // non-traceable author statement /// 4295 // trypsin activity // inferred from electronic annotation /// 4263 // chymotrypsin activity // inferred from sequence similarity	6508 // proteolysis // non-traceable author statement	---	IPR001254 // Peptidase S1, chymotrypsin // 9.2E-56 /// IPR001254 // Peptidase S1, chymotrypsin // 1.5E-43
2264	143463_at	-1.20505	1.06014	-8.41807	1.47096e-09	9.57414e-08	11.8676	FBgn0004414	CG14560	msopa	male-specific opa containing gene	45962	---	6952 // defense response // inferred from sequence or structural similarity /// 6952 // defense response // inferred from sequence similarity	---	---
2651	143850_at	-0.679039	0.274814	-8.41323	1.48973e-09	9.618e-08	11.8551	FBgn0015818	CG3780	Spx	Spliceosomal protein on the X	31558	3729 // mRNA binding // inferred from sequence or structural similarity /// 31202 // RNA splicing factor activity, transesterification mechanism // inferred from sequence or structural similarity /// 5515 // protein binding // inferred from physical interaction /// 166 // nucleotide binding // inferred from electronic annotation /// 3676 // nucleic acid binding // inferred from electronic annotat…	398 // nuclear mRNA splicing, via spliceosome // inferred from sequence or structural similarity /// 6398 // histone mRNA 3'-end processing // inferred from electronic annotation /// 398 // nuclear mRNA splicing, via spliceosome // inferred from sequence similarity	5681 // spliceosome complex // inferred from sequence or structural similarity /// 5681 // spliceosome complex // non-traceable author statement /// 5686 // snRNP U2 // inferred from sequence or structural similarity /// 5681 // spliceosome complex // inferred from sequence similarity /// 5686 // snRNP U2 // inferred from sequence similarity	IPR000504 // RNA-binding region RNP-1 (RNA recognition motif) // 3.1E-18 /// IPR000504 // RNA-binding region RNP-1 (RNA recognition motif) // 3.9E-23
3954	145153_at	-0.667919	1.60727	-8.40896	1.5065e-09	9.63749e-08	11.844	FBgn0053173	CG33173	CG33173	CG33173	318910	166 // nucleotide binding // inferred from electronic annotation /// 5215 // transporter activity // inferred from sequence or structural similarity /// 5524 // ATP binding // inferred from electronic annotation /// 8061 // chitin binding // inferred from electronic annotation /// 42626 // ATPase activity, coupled to transmembrane movement of substances // inferred from sequence or structural sim…	6030 // chitin metabolism // inferred from electronic annotation /// 6810 // transport // inferred from sequence or structural similarity /// 6810 // transport // inferred from sequence similarity	5576 // extracellular region // inferred from electronic annotation /// 43190 // ATP-binding cassette (ABC) transporter complex // inferred from sequence or structural similarity /// 43190 // ATP-binding cassette (ABC) transporter complex // inferred from sequence similarity	IPR002557 // Chitin binding Peritrophin-A // 8.9E-19 /// IPR002557 // Chitin binding Peritrophin-A // 4.2E-15 /// IPR003439 // ABC transporter // 4.5E-25 /// IPR003439 // ABC transporter // 5.0E-21
1208	142407_at	-0.595464	1.84807	-8.40521	1.52142e-09	9.68866e-08	11.8343	FBgn0036622	CG4753	CG4753	CG4753	39819	3841 // 1-acylglycerol-3-phosphate O-acyltransferase activity // inferred from sequence or structural similarity /// 8415 // acyltransferase activity // inferred from electronic annotation /// 3841 // 1-acylglycerol-3-phosphate O-acyltransferase activity // inferred from sequence similarity	8152 // metabolism // inferred from electronic annotation	---	IPR002123 // Phospholipid/glycerol acyltransferase // 8.0E-9
9323	150522_at	-0.523189	-0.211006	-8.35653	1.72884e-09	1.08615e-07	11.7079	FBgn0039221	CG13632	CG13632	CG13632	42948	---	---	---	---
3579	144778_at	-0.690676	0.422757	-8.33586	1.82545e-09	1.13665e-07	11.6541	FBgn0052694	CG32694	CG32694	CG32694	31933	---	---	---	---
995	142194_at	-0.570564	2.24681	-8.31743	1.91622e-09	1.18277e-07	11.6061	FBgn0031813	CG9527	CG9527	CG9527	33898	16402 // pristanoyl-CoA oxidase activity // non-traceable author statement /// 3995 // acyl-CoA dehydrogenase activity // inferred from electronic annotation /// 3997 // acyl-CoA oxidase activity // inferred from electronic annotation /// 16491 // oxidoreductase activity // inferred from electronic annotation /// 50660 // FAD binding // inferred from electronic annotation	6118 // electron transport // inferred from electronic annotation /// 6635 // fatty acid beta-oxidation // inferred from electronic annotation /// 6631 // fatty acid metabolism // inferred from electronic annotation	5777 // peroxisome // inferred from electronic annotation	IPR002655 // Acyl-CoA oxidase // 5.0E-24 /// IPR006090 // Acyl-CoA dehydrogenase, C-terminal // 5.8E-5
9908	151107_r_at	-0.762624	1.76863	-8.31352	1.93604e-09	1.18622e-07	11.5959	FBgn0005596	CG14513	yem	yemanuclein	43439	3677 // DNA binding // non-traceable author statement /// 3677 // DNA binding // traceable author statement	9993 // oogenesis (sensu Insecta) // non-traceable author statement	5634 // nucleus // non-traceable author statement /// 5634 // nucleus // traceable author statement	---
6462	147661_at	-0.510442	0.106311	-8.30955	1.95639e-09	1.1917e-07	11.5856	FBgn0000008	CG6741	a	arc	43852	5515 // protein binding // inferred from electronic annotation /// 5515 // protein binding // inferred from physical interaction	7456 // eye development (sensu Endopterygota) // inferred from mutant phenotype	5912 // adherens junction // inferred from direct assay /// 5912 // adherens junction // non-traceable author statement /// 16324 // apical plasma membrane // inferred from direct assay	IPR001478 // PDZ/DHR/GLGF domain // 1.1E-4 /// IPR001478 // PDZ/DHR/GLGF domain // 1.5E-15
10158	151357_at	-0.412347	-0.102202	-8.29432	2.03653e-09	1.23514e-07	11.5459	FBgn0052542	CG32542	CG32542	CG32542	32883	---	---	---	IPR007527 // SWIM Zn-finger // 1.4E-8
8029	149228_at	-1.08686	-0.530238	-8.28937	2.0633e-09	1.24599e-07	11.533	FBgn0037161	CG14460	CG14460	CG14460	40466	---	---	---	---
11545	152744_at	-0.596563	3.74278	-8.27788	2.12682e-09	1.27883e-07	11.503	FBgn0035032	CG4692	CG4692	CG4692	37931	8553 // hydrogen-exporting ATPase activity, phosphorylative mechanism // inferred from sequence or structural similarity /// 5515 // protein binding // inferred from physical interaction /// 15078 // hydrogen ion transporter activity // inferred from electronic annotation /// 46872 // metal ion binding // inferred from electronic annotation /// 8553 // hydrogen-exporting ATPase activity, phosphor…	6118 // electron transport // inferred from electronic annotation /// 6119 // oxidative phosphorylation // inferred from electronic annotation /// 15992 // proton transport // inferred from sequence or structural similarity /// 6754 // ATP biosynthesis // inferred from electronic annotation /// 6810 // transport // inferred from electronic annotation /// 6811 // ion transport // inferred from ele…	276 // proton-transporting ATP synthase complex, coupling factor F(o) (sensu Eukaryota) // inferred from sequence or structural similarity /// 5739 // mitochondrion // inferred from electronic annotation /// 45263 // proton-transporting ATP synthase complex, coupling factor F(o) // inferred from electronic annotation /// 276 // proton-transporting ATP synthase complex, coupling factor F(o) (sensu…	---
3597	144796_at	-0.521135	0.694598	-8.27519	2.14195e-09	1.28243e-07	11.496	FBgn0000711	CG2096	flw	flap wing	44289	163 // protein phosphatase type 1 activity // inferred from sequence or structural similarity /// 4722 // protein serine/threonine phosphatase activity // non-traceable author statement /// 17018 // myosin phosphatase activity // inferred from direct assay /// 5515 // protein binding // inferred from physical interaction /// 4721 // phosphoprotein phosphatase activity // inferred from electronic …	2168 // larval development (sensu Insecta) // non-traceable author statement /// 6470 // protein amino acid dephosphorylation // inferred from sequence or structural similarity /// 6470 // protein amino acid dephosphorylation // non-traceable author statement /// 7155 // cell adhesion // non-traceable author statement /// 7300 // nurse cell to oocyte transport (sensu Insecta) // inferred from mut…	164 // protein phosphatase type 1 complex // inferred from sequence or structural similarity /// 164 // protein phosphatase type 1 complex // inferred from sequence similarity	IPR004843 // Metallo-phosphoesterase // 2.5E-44
170	141369_at	-2.23226	1.47211	-8.26382	2.20727e-09	1.31033e-07	11.4663	FBgn0039778	CG18030	Jon99Fi	Jonah 99Fi	43622	4252 // serine-type endopeptidase activity // non-traceable author statement /// 4263 // chymotrypsin activity // inferred from electronic annotation /// 4295 // trypsin activity // inferred from electronic annotation /// 3700 // transcription factor activity // inferred from mutant phenotype /// 4252 // serine-type endopeptidase activity // inferred from electronic annotation /// 8233 // peptida…	6508 // proteolysis // inferred from electronic annotation /// 2168 // larval development (sensu Insecta) // inferred from mutant phenotype /// 7591 // molting cycle (sensu Insecta) // inferred from mutant phenotype	5634 // nucleus // inferred from direct assay	IPR001254 // Peptidase S1, chymotrypsin // 3.7E-55
2731	143930_at	-1.10883	3.06428	-8.24941	2.2929e-09	1.34645e-07	11.4286	FBgn0020509	CG1262	Acp62F	Accessory gland peptide 62F	38340	4867 // serine-type endopeptidase inhibitor activity // inferred from direct assay /// 4867 // serine-type endopeptidase inhibitor activity // inferred from sequence or structural similarity /// 30414 // protease inhibitor activity // traceable author statement /// 4867 // serine-type endopeptidase inhibitor activity // inferred from sequence similarity	7582 // physiological process // non-traceable author statement /// 8340 // determination of adult life span // non-traceable author statement /// 30162 // regulation of proteolysis // traceable author statement /// 45297 // post-mating behavior // non-traceable author statement /// 45861 // negative regulation of proteolysis // inferred from sequence or structural similarity /// 45861 // negativ…	---	IPR002919 // Trypsin inhibitor-like, cysteine-rich TIL region // 1.4E-20
4969	146168_at	-0.528472	0.377257	-8.24874	2.29695e-09	1.34645e-07	11.4269	FBgn0051721	CG31721	Trim9	Trim9	34453	4842 // ubiquitin-protein ligase activity // inferred from electronic annotation /// 8270 // zinc ion binding // inferred from electronic annotation /// 5515 // protein binding // inferred from electronic annotation	16567 // protein ubiquitination // inferred from electronic annotation	151 // ubiquitin ligase complex // inferred from electronic annotation /// 5622 // intracellular // inferred from electronic annotation	IPR000315 // Zn-finger, B-box // 1.0E-6 /// IPR003961 // Fibronectin, type III // 5.5E-8 /// IPR003877 // SPla/RYanodine receptor SPRY // 1.4E-29
11484	152683_at	-0.397157	1.41751	-8.22639	2.43678e-09	1.42247e-07	11.3684	FBgn0034883	CG17664	CG17664	CG17664	37737	5386 // carrier activity // inferred from electronic annotation /// 5488 // binding // inferred from electronic annotation /// 15250 // water channel activity // inferred from sequence or structural similarity /// 5215 // transporter activity // inferred from electronic annotation /// 15250 // water channel activity // inferred from sequence similarity	6810 // transport // inferred from electronic annotation /// 19725 // cell homeostasis // inferred from electronic annotation	16020 // membrane // inferred from electronic annotation /// 16021 // integral to membrane // inferred from electronic annotation	IPR000425 // Major intrinsic protein // 3.8E-51
1281	142480_at	-0.575095	3.35322	-8.19481	2.6493e-09	1.52118e-07	11.2857	FBgn0063491	CG17534	GstE9	Glutathione S transferase E9	246581	4364 // glutathione transferase activity // inferred from sequence or structural similarity /// 4364 // glutathione transferase activity // non-traceable author statement /// 5515 // protein binding // inferred from physical interaction /// 4364 // glutathione transferase activity // inferred from electronic annotation /// 16740 // transferase activity // inferred from electronic annotation /// 4…	6952 // defense response // inferred from electronic annotation /// 9636 // response to toxin // non-traceable author statement	---	IPR004046 // Glutathione S-transferase, C-terminal // 4.9E-10 /// IPR004045 // Glutathione S-transferase, N-terminal // 3.0E-19
2745	143944_at	-1.66487	1.57995	-8.19074	2.678e-09	1.53138e-07	11.2751	FBgn0020906	CG8867	Jon25Bi	Jonah 25Bi	---	4252 // serine-type endopeptidase activity // inferred from electronic annotation /// 8233 // peptidase activity // inferred from electronic annotation /// 16787 // hydrolase activity // inferred from electronic annotation /// 42708 // elastase activity // non-traceable author statement	6508 // proteolysis // inferred from electronic annotation /// 6508 // proteolysis // non-traceable author statement	---	IPR001254 // Peptidase S1, chymotrypsin // 2.5E-52
5979	147178_at	-0.52419	2.46792	-8.18315	2.73243e-09	1.54985e-07	11.2552	FBgn0033886	CG13349	CG13349	CG13349	36545	5515 // protein binding // inferred from physical interaction	7155 // cell adhesion // inferred from electronic annotation	16021 // integral to membrane // inferred from electronic annotation	IPR006773 // Adhesion regulating molecule // 1.0E-126
6129	147328_at	-1.1191	3.74396	-8.17816	2.76882e-09	1.56416e-07	11.2421	FBgn0034153	CG15616	Acp53C14b	Acp53C14b	36873	---	---	---	---
5590	146789_i_at	-0.621081	0.590664	-8.17335	2.80435e-09	1.57787e-07	11.2295	FBgn0050372	CG30372	CG30372	CG30372	35783	8060 // ARF GTPase activator activity // inferred from sequence or structural similarity /// 8060 // ARF GTPase activator activity // inferred from sequence similarity	7264 // small GTPase mediated signal transduction // inferred from sequence or structural similarity /// 43087 // regulation of GTPase activity // inferred from electronic annotation /// 7264 // small GTPase mediated signal transduction // inferred from sequence similarity	---	IPR001164 // Human Rev interacting-like protein (hRIP) // 7.1E-34 /// IPR002110 // Ankyrin // 0.0098 /// IPR002110 // Ankyrin // 2.5E-5 /// IPR001452 // SH3 // 1.7E-12 /// IPR001849 // Pleckstrin-like // 1.8E-19
10161	151360_at	-0.817489	2.83051	-8.14971	2.98588e-09	1.66273e-07	11.1674	FBgn0040887	CG33254	CG33254	CG33254	2768869	---	---	---	---
1866	143065_at	-0.392177	0.63978	-8.12894	3.1553e-09	1.74159e-07	11.1128	FBgn0000061	CG3935	al	aristaless	33208	3700 // transcription factor activity // inferred from sequence or structural similarity /// 3704 // specific RNA polymerase II transcription factor activity // non-traceable author statement /// 5515 // protein binding // inferred from physical interaction /// 3677 // DNA binding // inferred from electronic annotation /// 3700 // transcription factor activity // inferred from electronic annotati…	6355 // regulation of transcription, DNA-dependent // inferred from sequence or structural similarity /// 6357 // regulation of transcription from RNA polymerase II promoter // inferred from electronic annotation /// 7449 // proximal/distal pattern formation, imaginal disc // non-traceable author statement /// 7469 // antennal development // inferred from mutant phenotype /// 35015 // elongation …	5634 // nucleus // inferred from sequence or structural similarity /// 5634 // nucleus // non-traceable author statement /// 5634 // nucleus // inferred from electronic annotation /// 5634 // nucleus // inferred from sequence similarity	IPR003654 // Paired-like homeodomain protein, OAR // 1.1E-7 /// IPR001356 // Homeobox // 1.1E-34
4780	145979_at	-0.638391	1.95201	-8.11817	3.24698e-09	1.77362e-07	11.0845	FBgn0031942	CG7203	CG7203	CG7203	34055	---	---	---	---
1990	143189_at	-0.49526	-0.150359	-8.11276	3.29402e-09	1.78145e-07	11.0703	FBgn0001204	CG9768	hkb	huckebein	40549	3676 // nucleic acid binding // inferred from electronic annotation /// 3704 // specific RNA polymerase II transcription factor activity // inferred from sequence or structural similarity /// 8270 // zinc ion binding // inferred from electronic annotation /// 5515 // protein binding // inferred from physical interaction /// 46872 // metal ion binding // inferred from electronic annotation /// 370…	1706 // endoderm formation // traceable author statement /// 1708 // cell fate specification // traceable author statement /// 6351 // transcription, DNA-dependent // non-traceable author statement /// 6357 // regulation of transcription from RNA polymerase II promoter // inferred from electronic annotation /// 7362 // terminal region determination // traceable author statement /// 7369 // gastru…	5634 // nucleus // inferred from direct assay /// 5634 // nucleus // inferred from sequence or structural similarity /// 5634 // nucleus // inferred from electronic annotation /// 5634 // nucleus // inferred from sequence similarity	IPR007087 // Zn-finger, C2H2 type // 5.5E-6 /// IPR007087 // Zn-finger, C2H2 type // 2.3E-7 /// IPR007087 // Zn-finger, C2H2 type // 7.6E-7
3490	144689_at	-0.460955	-0.20445	-8.11139	3.30605e-09	1.78145e-07	11.0667	FBgn0003349	CG32717	sdt	stardust	44861	4385 // guanylate kinase activity // inferred from sequence or structural similarity /// 4385 // guanylate kinase activity // non-traceable author statement /// 4385 // guanylate kinase activity // traceable author statement /// 5515 // protein binding // inferred from sequence or structural similarity /// 5515 // protein binding // traceable author statement /// 5515 // protein binding // inferr…	1738 // morphogenesis of a polarized epithelium // traceable author statement /// 2009 // morphogenesis of an epithelium // non-traceable author statement /// 2009 // morphogenesis of an epithelium // traceable author statement /// 6605 // protein targeting // inferred from electronic annotation /// 7043 // intercellular junction assembly // non-traceable author statement /// 7163 // establishmen…	5737 // cytoplasm // non-traceable author statement /// 5886 // plasma membrane // inferred from sequence or structural similarity /// 5912 // adherens junction // inferred from direct assay /// 5913 // cell-cell adherens junction // non-traceable author statement /// 5918 // septate junction // traceable author statement /// 16020 // membrane // inferred from sequence or structural similarity //…	IPR001478 // PDZ/DHR/GLGF domain // 2.0E-12 /// IPR001452 // SH3 // 6.8E-5 /// IPR004172 // L27 domain // 2.8E-14 /// IPR008144 // Guanylate kinase // 1.2E-32 /// IPR001478 // PDZ/DHR/GLGF domain // 5.3E-6 /// IPR001478 // PDZ/DHR/GLGF domain // 2.0E-12 /// IPR001452 // SH3 // 6.8E-5 /// IPR004172 // L27 domain // 2.8E-14 /// IPR008144 // Guanylate kinase // 1.2E-32
4205	145404_at	-0.478298	0.0738362	-8.11278	3.29379e-09	1.78145e-07	11.0704	FBgn0031079	CG11940	CG11940	CG11940	33003	5057 // receptor signaling protein activity // inferred from electronic annotation	7165 // signal transduction // inferred from electronic annotation /// 7166 // cell surface receptor linked signal transduction // inferred from electronic annotation /// 7169 // transmembrane receptor protein tyrosine kinase signaling pathway // inferred from electronic annotation /// 7275 // development // inferred from electronic annotation	---	IPR000159 // RA domain // 8.8E-22 /// IPR001849 // Pleckstrin-like // 4.7E-11 /// IPR000159 // RA domain // 8.8E-22 /// IPR001849 // Pleckstrin-like // 4.7E-11
5534	146733_at	-0.638458	0.261722	-8.10832	3.33317e-09	1.78302e-07	11.0586	FBgn0033166	CG11166	CG11166	CG11166	35660	5515 // protein binding // inferred from physical interaction	---	---	---
7055	148254_at	-1.09742	1.21933	-8.07624	3.63032e-09	1.91928e-07	10.9741	FBgn0035666	CG6580	Jon65Aii	Jonah 65Aii	38684	4252 // serine-type endopeptidase activity // inferred from sequence or structural similarity /// 4252 // serine-type endopeptidase activity // non-traceable author statement /// 4263 // chymotrypsin activity // inferred from electronic annotation /// 4295 // trypsin activity // inferred from electronic annotation /// 4252 // serine-type endopeptidase activity // inferred from sequence similarity	6508 // proteolysis // non-traceable author statement	---	IPR001254 // Peptidase S1, chymotrypsin // 8.7E-43
1672	142871_s_at	-0.568543	2.80158	-8.07215	3.67012e-09	1.93302e-07	10.9633	FBgn0030734	CG9911	CG9911	CG9911	32588	3756 // protein disulfide isomerase activity // inferred from electronic annotation /// 3756 // protein disulfide isomerase activity // inferred from sequence or structural similarity /// 5515 // protein binding // inferred from physical interaction /// 3756 // protein disulfide isomerase activity // inferred from sequence similarity	6118 // electron transport // inferred from electronic annotation /// 6464 // protein modification // inferred from electronic annotation	---	IPR006662 // Thioredoxin type domain // 3.3E-17 /// IPR006662 // Thioredoxin type domain // 2.3E-17
7957	149156_at	-0.694106	2.17388	-8.06789	3.71199e-09	1.94775e-07	10.9521	FBgn0037038	CG11037	CG11037	CG11037	40317	4252 // serine-type endopeptidase activity // inferred from sequence or structural similarity /// 4263 // chymotrypsin activity // inferred from electronic annotation /// 4295 // trypsin activity // non-traceable author statement /// 4252 // serine-type endopeptidase activity // inferred from electronic annotation /// 4252 // serine-type endopeptidase activity // inferred from sequence similarity	6508 // proteolysis // non-traceable author statement /// 6508 // proteolysis // inferred from electronic annotation	---	IPR001254 // Peptidase S1, chymotrypsin // 6.4E-55
2994	144193_at	-0.437925	0.177242	-8.04931	3.90055e-09	2.03906e-07	10.9031	FBgn0027796	CG18531	Gr2a	Gustatory receptor 2a	31093	4984 // olfactory receptor activity // inferred from electronic annotation /// 5549 // odorant binding // inferred from electronic annotation /// 8527 // taste receptor activity // non-traceable author statement	7608 // sensory perception of smell // inferred from electronic annotation /// 50909 // sensory perception of taste // non-traceable author statement	16021 // integral to membrane // non-traceable author statement	---
3373	144572_at	-0.840704	1.6928	-8.01281	4.29981e-09	2.22289e-07	10.8067	FBgn0029838	CG4666	CG4666	CG4666	31541	---	---	---	---
2141	143340_f_at	-1.75692	5.27556	-8.00868	4.34753e-09	2.2393e-07	10.7958	FBgn0003356 /// FBgn0003357	CG31362 /// CG31034	Jon99Cii /// Jon99Ciii	Jonah 99Cii /// Jonah 99Ciii	43543 /// 43544	4252 // serine-type endopeptidase activity // inferred from sequence or structural similarity /// 4252 // serine-type endopeptidase activity // non-traceable author statement /// 4263 // chymotrypsin activity // non-traceable author statement /// 4295 // trypsin activity // inferred from electronic annotation /// 8236 // serine-type peptidase activity // non-traceable author statement /// 4252 //…	6508 // proteolysis // non-traceable author statement /// 7586 // digestion // non-traceable author statement /// 6508 // proteolysis // inferred from electronic annotation	---	IPR001254 // Peptidase S1, chymotrypsin // 1.1E-57
12521	153720_at	-0.38885	1.473	-7.99829	4.46996e-09	2.27724e-07	10.7683	FBgn0031495	CG17257	CG17257	CG17257	33516	46872 // metal ion binding // inferred from electronic annotation /// 5515 // protein binding // inferred from physical interaction /// 8270 // zinc ion binding // inferred from electronic annotation	---	---	IPR001594 // Zn-finger, DHHC type // 2.3E-12
11184	152383_at	-0.875792	4.62542	-7.98458	4.63688e-09	2.35372e-07	10.732	FBgn0000116	CG32031	Argk	Arginine kinase	39041	4054 // arginine kinase activity // inferred from sequence or structural similarity /// 4054 // arginine kinase activity // non-traceable author statement /// 4054 // arginine kinase activity // inferred from electronic annotation /// 16301 // kinase activity // inferred from electronic annotation /// 16740 // transferase activity // inferred from electronic annotation /// 16772 // transferase ac…	16310 // phosphorylation // inferred from sequence or structural similarity /// 16310 // phosphorylation // inferred from sequence similarity	---	IPR000749 // ATP:guanido phosphotransferase // 8.4E-35 /// IPR000749 // ATP:guanido phosphotransferase // 1.0E-126 /// IPR000749 // ATP:guanido phosphotransferase // 8.4E-35 /// IPR000749 // ATP:guanido phosphotransferase // 1.0E-126 /// IPR000749 // ATP:guanido phosphotransferase // 8.4E-35 /// IPR000749 // ATP:guanido phosphotransferase // 1.0E-126 /// IPR000749 // ATP:guanido phosphotransferas…
4853	146052_at	-0.638654	2.53313	-7.98238	4.66427e-09	2.35907e-07	10.7262	FBgn0032074	CG9494	Tsp29Fa	Tetraspanin 29Fa	34211	5102 // receptor binding // inferred from electronic annotation	7165 // signal transduction // inferred from electronic annotation /// 16337 // cell-cell adhesion // inferred from electronic annotation	16021 // integral to membrane // inferred from sequence or structural similarity /// 16021 // integral to membrane // inferred from electronic annotation /// 16021 // integral to membrane // inferred from sequence similarity	IPR000301 // CD9/CD37/CD63 antigen // 2.3E-52
2866	144065_at	-0.462469	1.45183	-7.97467	4.76159e-09	2.39963e-07	10.7058	FBgn0025469	CG8717	slv	saliva	35773	5515 // protein binding // inferred from physical interaction	---	16020 // membrane // inferred from electronic annotation	IPR004316 // MtN3 and saliva related transmembrane protein // 3.1E-36 /// IPR004316 // MtN3 and saliva related transmembrane protein // 2.3E-38
6627	147826_at	-0.663479	0.151939	-7.95541	5.0135e-09	2.50854e-07	10.6547	FBgn0053519	CG33519	CG33519	CG33519	3346201	5524 // ATP binding // inferred from electronic annotation /// 4672 // protein kinase activity // inferred from electronic annotation	6468 // protein amino acid phosphorylation // inferred from electronic annotation	---	IPR003961 // Fibronectin, type III // 2.8E-8 /// IPR003961 // Fibronectin, type III // 9.2E-14 /// IPR000719 // Protein kinase // 1.9E-51 /// IPR000719 // Protein kinase // 9.3E-42 /// IPR007110 // Immunoglobulin-like // 3.2 /// IPR007110 // Immunoglobulin-like // 7.8E-5 /// IPR007110 // Immunoglobulin-like // 2.2E-5 /// IPR007110 // Immunoglobulin-like // 0.1 /// IPR007110 // Immunoglobulin-like…
2730	143929_at	-0.746463	1.1341	-7.93925	5.23543e-09	2.59537e-07	10.6119	FBgn0020508	CG9540	Ag5r2	Antigen 5-related 2	44079	---	6952 // defense response // inferred from electronic annotation	5576 // extracellular region // inferred from sequence or structural similarity /// 5576 // extracellular region // inferred from electronic annotation /// 5576 // extracellular region // inferred from sequence similarity	IPR001283 // Allergen V5/Tpx-1 related // 2.2E-45
2474	143673_at	-0.839026	4.04552	-7.93285	5.32615e-09	2.62744e-07	10.5949	FBgn0011670	CG4986	Mst57Dc	Male-specific RNA 57Dc	43121	---	18991 // oviposition // non-traceable author statement /// 45297 // post-mating behavior // non-traceable author statement /// 7610 // behavior // inferred from electronic annotation	5576 // extracellular region // non-traceable author statement	---
6048	147247_at	-0.553624	-0.109931	-7.92403	5.45359e-09	2.68087e-07	10.5715	FBgn0034017	CG18625	CG18625	CG18625	36709	---	---	---	---
3274	144473_at	-0.603051	1.64027	-7.91835	5.53746e-09	2.70376e-07	10.5564	FBgn0029702	CG15572	CG15572	CG15572	31371	---	---	---	---
1327	142526_at	-0.510804	0.470085	-7.91331	5.61276e-09	2.72122e-07	10.543	FBgn0050389	CG30389	CG30389	CG30389	37410	---	---	---	---
8572	149771_at	-0.493421	2.39396	-7.91327	5.61337e-09	2.72122e-07	10.5429	FBgn0038038	CG5167	CG5167	CG5167	41521	---	---	---	---
12007	153206_at	-0.518337	0.649694	-7.90318	5.76762e-09	2.75783e-07	10.5161	FBgn0031740	CG7239	CG7239	CG7239	33809	5515 // protein binding // inferred from physical interaction /// 3677 // DNA binding // inferred from electronic annotation	45449 // regulation of transcription // inferred from electronic annotation	---	---
10633	151832_at	-0.50816	1.42314	-7.88409	6.07116e-09	2.88329e-07	10.4653	FBgn0022774	CG8782	Oat	Ornithine aminotransferase precursor	40145	4587 // ornithine-oxo-acid transaminase activity // inferred from sequence or structural similarity /// 4587 // ornithine-oxo-acid transaminase activity // non-traceable author statement /// 30170 // pyridoxal phosphate binding // inferred from electronic annotation /// 4587 // ornithine-oxo-acid transaminase activity // inferred from electronic annotation /// 8483 // transaminase activity // inf…	6591 // ornithine metabolism // inferred from sequence or structural similarity /// 6591 // ornithine metabolism // non-traceable author statement /// 8652 // amino acid biosynthesis // inferred from electronic annotation /// 6591 // ornithine metabolism // inferred from sequence similarity	5739 // mitochondrion // inferred from direct assay /// 5759 // mitochondrial matrix // inferred from sequence or structural similarity /// 5759 // mitochondrial matrix // non-traceable author statement /// 5739 // mitochondrion // inferred from electronic annotation /// 5759 // mitochondrial matrix // inferred from sequence similarity	IPR005814 // Aminotransferase class-III // 1.0E-126
1179	142378_at	-0.877818	1.03111	-7.86506	6.38992e-09	3.00412e-07	10.4147	FBgn0038652	CG7720	CG7720	CG7720	42257	8324 // cation transporter activity // inferred from electronic annotation /// 8507 // sodium:iodide symporter activity // inferred from sequence or structural similarity /// 5215 // transporter activity // inferred from electronic annotation /// 8507 // sodium:iodide symporter activity // inferred from sequence similarity	6732 // coenzyme metabolism // inferred from electronic annotation /// 6812 // cation transport // inferred from electronic annotation /// 6858 // extracellular transport // inferred from electronic annotation /// 51189 // prosthetic group metabolism // inferred from electronic annotation /// 6810 // transport // inferred from electronic annotation	16020 // membrane // inferred from electronic annotation	---
11079	152278_at	-0.570259	0.143859	-7.86552	6.38196e-09	3.00412e-07	10.4159	FBgn0003218	CG11111	rdgB	retinal degeneration B	32340	5388 // calcium-transporting ATPase activity // inferred from sequence or structural similarity /// 5509 // calcium ion binding // inferred from sequence or structural similarity /// 8525 // phosphatidylcholine transporter activity // inferred from direct assay /// 8526 // phosphatidylinositol transporter activity // inferred from direct assay /// 8526 // phosphatidylinositol transporter activity…	6629 // lipid metabolism // inferred from electronic annotation /// 6869 // lipid transport // inferred from electronic annotation /// 7601 // visual perception // non-traceable author statement /// 7602 // phototransduction // inferred from mutant phenotype /// 7602 // phototransduction // traceable author statement /// 7608 // sensory perception of smell // inferred from mutant phenotype /// 16…	5622 // intracellular // inferred from electronic annotation /// 5886 // plasma membrane // inferred from sequence or structural similarity /// 5887 // integral to plasma membrane // inferred from sequence or structural similarity /// 16021 // integral to membrane // inferred from sequence or structural similarity /// 16021 // integral to membrane // traceable author statement /// 16029 // subrha…	IPR004177 // DDHD domain // 6.1E-92 /// IPR001666 // Phosphatidylinositol transfer protein // 1.0E-126 /// IPR004177 // DDHD domain // 6.1E-92
11771	152970_at	-0.551972	2.56004	-7.86287	6.42765e-09	3.01175e-07	10.4089	FBgn0010548	CG11140	Aldh-III	Aldehyde dehydrogenase type III	45398	4028 // 3-chloroallyl aldehyde dehydrogenase activity // inferred from sequence or structural similarity /// 4030 // aldehyde dehydrogenase [NAD(P)+] activity // inferred from electronic annotation /// 16491 // oxidoreductase activity // inferred from electronic annotation /// 4028 // 3-chloroallyl aldehyde dehydrogenase activity // inferred from sequence similarity	6952 // defense response // inferred from electronic annotation /// 8152 // metabolism // inferred from electronic annotation /// 9636 // response to toxin // inferred from electronic annotation /// 6081 // aldehyde metabolism // inferred from electronic annotation	---	IPR002086 // Aldehyde dehydrogenase // 3.3E-32 /// IPR002086 // Aldehyde dehydrogenase // 8.4E-8 /// IPR002086 // Aldehyde dehydrogenase // 5.7E-49 /// IPR002086 // Aldehyde dehydrogenase // 1.3E-44 /// IPR002086 // Aldehyde dehydrogenase // 1.3E-44
6790	147989_at	-0.714896	0.893698	-7.85078	6.64027e-09	3.0602e-07	10.3767	---	CG18170 /// CG33791	---	---	---	4591 // oxoglutarate dehydrogenase (succinyl-transferring) activity // inferred from sequence or structural similarity /// 4591 // oxoglutarate dehydrogenase (succinyl-transferring) activity // inferred from electronic annotation /// 30976 // thiamin pyrophosphate binding // inferred from electronic annotation /// 16624 // oxidoreductase activity, acting on the aldehyde or oxo group of donors, di…	6099 // tricarboxylic acid cycle // inferred from sequence or structural similarity /// 6096 // glycolysis // inferred from electronic annotation /// 8152 // metabolism // inferred from electronic annotation	9353 // oxoglutarate dehydrogenase complex (sensu Eukaryota) // inferred from sequence or structural similarity	---
10138	151337_at	-0.669108	0.369721	-7.85236	6.61193e-09	3.0602e-07	10.3809	FBgn0040862	CG12714	CG12714	CG12714	50335	---	---	---	---
1744	142943_at	-0.409294	0.474317	-7.83921	6.85035e-09	3.12819e-07	10.3459	FBgn0052772	CG32772	CG32772	CG32772	31420	3676 // nucleic acid binding // inferred from sequence or structural similarity /// 3677 // DNA binding // inferred from electronic annotation /// 8270 // zinc ion binding // inferred from electronic annotation /// 30528 // transcription regulator activity // inferred from electronic annotation /// 3676 // nucleic acid binding // inferred from electronic annotation /// 46872 // metal ion binding …	6357 // regulation of transcription from RNA polymerase II promoter // inferred from electronic annotation /// 8283 // cell proliferation // inferred from electronic annotation	5634 // nucleus // inferred from electronic annotation	IPR007087 // Zn-finger, C2H2 type // 5.5E-6 /// IPR007087 // Zn-finger, C2H2 type // 9.6E-7 /// IPR007087 // Zn-finger, C2H2 type // 2.9E-6 /// IPR007087 // Zn-finger, C2H2 type // 8.2E-5 /// IPR007087 // Zn-finger, C2H2 type // 1.9E-5 /// IPR007087 // Zn-finger, C2H2 type // 1.2E-6 /// IPR007087 // Zn-finger, C2H2 type // 9.6E-7 /// IPR007087 // Zn-finger, C2H2 type // 2.9E-6 /// IPR007087 // Zn…
12160	153359_at	-0.672084	3.37558	-7.83897	6.85479e-09	3.12819e-07	10.3452	FBgn0040309	CG1633	Jafrac1	thioredoxin peroxidase 1	53578	4601 // peroxidase activity // non-traceable author statement /// 4602 // glutathione peroxidase activity // inferred from direct assay /// 8379 // thioredoxin peroxidase activity // inferred from direct assay /// 8379 // thioredoxin peroxidase activity // inferred from sequence or structural similarity /// 8379 // thioredoxin peroxidase activity // non-traceable author statement /// 16209 // ant…	6800 // oxygen and reactive oxygen species metabolism // inferred from electronic annotation /// 6952 // defense response // inferred from electronic annotation /// 45454 // cell redox homeostasis // inferred from direct assay	5829 // cytosol // inferred from direct assay /// 5829 // cytosol // non-traceable author statement	IPR000866 // Alkyl hydroperoxide reductase/ Thiol specific antioxidant/ Mal allergen // 1.1E-76
6127	147326_at	-0.455652	0.748117	-7.83331	6.96e-09	3.13849e-07	10.3302	FBgn0034151	CG15617	CG15617	CG15617	36871	5515 // protein binding // inferred from electronic annotation	---	---	IPR001478 // PDZ/DHR/GLGF domain // 6.1E-6
6911	148110_i_at	-0.795245	2.03658	-7.83301	6.96573e-09	3.13849e-07	10.3293	FBgn0026259	CG10840	eIF5B	eIF5B	44261	3743 // translation initiation factor activity // inferred from sequence or structural similarity /// 5525 // GTP binding // inferred from electronic annotation /// 17151 // DEAD/H-box RNA helicase binding // traceable author statement /// 3743 // translation initiation factor activity // inferred from electronic annotation /// 3743 // translation initiation factor activity // inferred from seque…	6413 // translational initiation // inferred from sequence or structural similarity /// 6412 // protein biosynthesis // inferred from electronic annotation /// 6413 // translational initiation // inferred from electronic annotation /// 6413 // translational initiation // inferred from sequence similarity	5737 // cytoplasm // inferred from sequence or structural similarity /// 5829 // cytosol // inferred from sequence or structural similarity /// 5622 // intracellular // inferred from electronic annotation /// 5737 // cytoplasm // inferred from sequence similarity /// 5829 // cytosol // inferred from sequence similarity	IPR004161 // Elongation factor Tu, domain 2 // 8.5E-7 /// IPR000795 // Protein synthesis factor, GTP-binding // 2.1E-38
4651	145850_i_at	-0.942282	1.53778	-7.8114	7.38346e-09	3.26184e-07	10.2717	FBgn0051645	CG31645	CG31645	CG31645	33812	4930 // G-protein coupled receptor activity // inferred from sequence or structural similarity /// 8188 // neuropeptide receptor activity // inferred from sequence or structural similarity /// 8528 // peptide receptor activity, G-protein coupled // inferred from sequence or structural similarity /// 1584 // rhodopsin-like receptor activity // inferred from electronic annotation /// 4872 // recept…	7186 // G-protein coupled receptor protein signaling pathway // inferred from sequence or structural similarity /// 7186 // G-protein coupled receptor protein signaling pathway // inferred from electronic annotation /// 7186 // G-protein coupled receptor protein signaling pathway // inferred from sequence similarity	16021 // integral to membrane // inferred from sequence or structural similarity /// 16021 // integral to membrane // inferred from electronic annotation /// 16021 // integral to membrane // inferred from sequence similarity	IPR000276 // Rhodopsin-like GPCR superfamily // 2.7E-46
7647	148846_at	-0.589165	1.18861	-7.8141	7.32998e-09	3.26184e-07	10.2789	FBgn0036568	CG5389	CG5389	CG5389	39761	166 // nucleotide binding // inferred from electronic annotation /// 5524 // ATP binding // inferred from electronic annotation /// 8553 // hydrogen-exporting ATPase activity, phosphorylative mechanism // inferred from sequence or structural similarity /// 46933 // hydrogen-transporting ATP synthase activity, rotational mechanism // inferred from electronic annotation /// 46961 // hydrogen-transp…	6144 // purine base metabolism // inferred from electronic annotation /// 6754 // ATP biosynthesis // inferred from electronic annotation /// 15986 // ATP synthesis coupled proton transport // inferred from electronic annotation /// 15992 // proton transport // inferred from sequence or structural similarity /// 15992 // proton transport // inferred from sequence similarity	275 // proton-transporting ATP synthase complex, catalytic core F(1) (sensu Eukaryota) // inferred from sequence or structural similarity /// 16021 // integral to membrane // inferred from electronic annotation /// 16469 // proton-transporting two-sector ATPase complex // inferred from electronic annotation /// 45255 // hydrogen-translocating F-type ATPase complex // inferred from electronic anno…	IPR004100 // H+-transporting two-sector ATPase, alpha/beta subunit, N-terminal // 7.4E-27 /// IPR000194 // H+-transporting two-sector ATPase, alpha/beta subunit, central region // 6.9E-81 /// IPR000793 // H+-transporting two-sector ATPase, alpha/beta subunit, C-terminal // 2.1E-48
3782	144981_at	-0.454887	-0.0214455	-7.80182	7.57665e-09	3.30682e-07	10.2461	FBgn0030444	CG18646	CG18646	CG18646	32253	5096 // GTPase activator activity // inferred from sequence or structural similarity /// 5515 // protein binding // inferred from electronic annotation /// 5096 // GTPase activator activity // inferred from sequence similarity	7155 // cell adhesion // inferred from electronic annotation	---	IPR000331 // Rap/ran-GAP // 9.4E-86 /// IPR000210 // BTB/POZ domain // 9.9E-8
3372	144571_at	-0.68744	0.0891427	-7.79514	7.71447e-09	3.34612e-07	10.2283	FBgn0029837	CG4690	Tsp5D	Tetraspanin 5D	31540	5386 // carrier activity // inferred from electronic annotation	6810 // transport // inferred from electronic annotation /// 7155 // cell adhesion // inferred from electronic annotation	5615 // extracellular space // inferred from electronic annotation /// 16021 // integral to membrane // inferred from sequence or structural similarity /// 16021 // integral to membrane // inferred from electronic annotation /// 16021 // integral to membrane // inferred from sequence similarity	IPR000301 // CD9/CD37/CD63 antigen // 3.4E-45
3256	144455_at	-1.03294	-0.339023	-7.79191	7.78207e-09	3.36502e-07	10.2197	FBgn0029681	CG15239	CG15239	CG15239	31343	---	---	---	---
8989	150188_at	-0.59385	2.41293	-7.78591	7.90908e-09	3.40942e-07	10.2037	FBgn0038697	CG3581	CG3581	CG3581	42315	3676 // nucleic acid binding // inferred from electronic annotation /// 3677 // DNA binding // inferred from electronic annotation /// 4386 // helicase activity // inferred from electronic annotation /// 5524 // ATP binding // inferred from electronic annotation	---	---	---
6937	148136_at	-0.484519	0.410578	-7.77905	8.05706e-09	3.46256e-07	10.1853	FBgn0035481	CG12605	CG12605	CG12605	38468	3676 // nucleic acid binding // inferred from electronic annotation /// 8270 // zinc ion binding // inferred from electronic annotation /// 30528 // transcription regulator activity // inferred from electronic annotation /// 46872 // metal ion binding // inferred from electronic annotation	6139 // nucleobase, nucleoside, nucleotide and nucleic acid metabolism // inferred from electronic annotation /// 6357 // regulation of transcription from RNA polymerase II promoter // inferred from electronic annotation /// 6366 // transcription from RNA polymerase II promoter // inferred from electronic annotation /// 8283 // cell proliferation // inferred from electronic annotation	5634 // nucleus // inferred from electronic annotation	IPR002951 // Atrophin // 0.0039 /// IPR007087 // Zn-finger, C2H2 type // 4.3E-6 /// IPR007087 // Zn-finger, C2H2 type // 1.2E-5 /// IPR007087 // Zn-finger, C2H2 type // 1.5E-7 /// IPR007087 // Zn-finger, C2H2 type // 1.2E-4 /// IPR002951 // Atrophin // 0.0039 /// IPR007087 // Zn-finger, C2H2 type // 4.3E-6 /// IPR007087 // Zn-finger, C2H2 type // 1.2E-5 /// IPR007087 // Zn-finger, C2H2 type // 1.…
1021	142220_at	-0.695099	1.44348	-7.7592	8.50085e-09	3.62135e-07	10.1323	FBgn0033367	CG8193	CG8193	CG8193	35910	4503 // monophenol monooxygenase activity // inferred from sequence or structural similarity /// 4503 // monophenol monooxygenase activity // non-traceable author statement /// 5344 // oxygen transporter activity // inferred from electronic annotation /// 4497 // monooxygenase activity // inferred from electronic annotation /// 4503 // monophenol monooxygenase activity // inferred from electronic…	6810 // transport // inferred from electronic annotation /// 6952 // defense response // non-traceable author statement /// 8152 // metabolism // inferred from electronic annotation /// 6583 // melanin biosynthesis from tyrosine // inferred from sequence or structural similarity /// 6952 // defense response // inferred from sequence or structural similarity /// 6583 // melanin biosynthesis from t…	5576 // extracellular region // inferred from direct assay	IPR000896 // Arthropod hemocyanin/insect LSP // 2.7E-80 /// IPR005204 // Hemocyanin, N-terminal // 5.3E-11 /// IPR005203 // Hemocyanin, C-terminal // 1.4E-57
2394	143593_at	-0.453943	-0.0202281	-7.72447	9.3382e-09	3.87626e-07	10.0393	FBgn0010296	CG10789	ng4	new glue 4	31301	5198 // structural molecule activity // non-traceable author statement	7127 // meiosis I // non-traceable author statement /// 7594 // puparial adhesion // non-traceable author statement	5576 // extracellular region // non-traceable author statement	---
9531	150730_at	-0.514245	0.566226	-7.72394	9.35172e-09	3.87626e-07	10.0379	FBgn0016061	CG31062	side	sidestep	43300	---	7165 // signal transduction // inferred from electronic annotation /// 8045 // motor axon guidance // inferred from mutant phenotype /// 16337 // cell-cell adhesion // inferred from electronic annotation	---	IPR003961 // Fibronectin, type III // 8.5E-6 /// IPR007110 // Immunoglobulin-like // 4.3E-8 /// IPR007110 // Immunoglobulin-like // 0.016 /// IPR007110 // Immunoglobulin-like // 5.1E-6 /// IPR007110 // Immunoglobulin-like // 1.1E-5
1587	142786_at	-0.594939	2.48507	-7.70632	9.80882e-09	4.01817e-07	9.99063	FBgn0037530	CG2943	CG2943	CG2943	40933	---	---	---	---
9533	150732_at	-0.75321	1.88467	-7.70485	9.84795e-09	4.02244e-07	9.98669	FBgn0039519	CG13977	Cyp6a18	Cyp6a18	43304	4497 // monooxygenase activity // inferred from electronic annotation /// 16491 // oxidoreductase activity // inferred from electronic annotation /// 5506 // iron ion binding // inferred from electronic annotation /// 20037 // heme binding // inferred from electronic annotation /// 46872 // metal ion binding // inferred from electronic annotation	6118 // electron transport // inferred from electronic annotation /// 8202 // steroid metabolism // inferred from electronic annotation	5792 // microsome // non-traceable author statement /// 16020 // membrane // non-traceable author statement /// 5783 // endoplasmic reticulum // inferred from electronic annotation /// 5792 // microsome // inferred from electronic annotation /// 16020 // membrane // inferred from electronic annotation	IPR001128 // Cytochrome P450 // 1.0E-126
4635	145834_at	-0.777199	0.477586	-7.69516	1.01098e-08	4.10548e-07	9.96071	FBgn0031722	CG14011	CG14011	CG14011	33790	---	---	---	---
4641	145840_at	-0.417092	-0.239186	-7.66017	1.11164e-08	4.43706e-07	9.86679	FBgn0031730	CG7236	CG7236	CG7236	33798	4674 // protein serine/threonine kinase activity // non-traceable author statement /// 4693 // cyclin-dependent protein kinase activity // inferred from sequence or structural similarity /// 4702 // receptor signaling protein serine/threonine kinase activity // inferred from electronic annotation /// 5524 // ATP binding // inferred from electronic annotation /// 4693 // cyclin-dependent protein k…	74 // regulation of progression through cell cycle // inferred from electronic annotation /// 910 // cytokinesis // inferred from mutant phenotype /// 6468 // protein amino acid phosphorylation // inferred from sequence or structural similarity /// 6468 // protein amino acid phosphorylation // non-traceable author statement /// 7169 // transmembrane receptor protein tyrosine kinase signaling path…	---	IPR000719 // Protein kinase // 2.1E-104
6355	147554_at	-0.411845	0.695362	-7.6609	1.10945e-08	4.43706e-07	9.86873	FBgn0028622	CG13432	l(2)05510	lethal (2) 05510	47065	5515 // protein binding // inferred from physical interaction	---	---	IPR001507 // Endoglin/CD105 antigen // 1.2E-47
236	141435_at	-1.2883	2.45129	-7.65562	1.12548e-08	4.47955e-07	9.85454	FBgn0031249	CG11911	CG11911	CG11911	33206	4252 // serine-type endopeptidase activity // inferred from sequence or structural similarity /// 4263 // chymotrypsin activity // non-traceable author statement /// 4295 // trypsin activity // inferred from electronic annotation /// 4252 // serine-type endopeptidase activity // inferred from electronic annotation /// 8236 // serine-type peptidase activity // inferred from electronic annotation /…	6508 // proteolysis // non-traceable author statement /// 6508 // proteolysis // inferred from electronic annotation	---	IPR001254 // Peptidase S1, chymotrypsin // 1.6E-63
11063	152262_at	-0.43209	1.33963	-7.6528	1.13413e-08	4.48847e-07	9.84696	FBgn0051547	CG31547	CG31547	CG31547	40663	5279 // amino acid-polyamine transporter activity // inferred from electronic annotation /// 8324 // cation transporter activity // inferred from electronic annotation /// 8511 // sodium:potassium:chloride symporter activity // inferred from sequence or structural similarity /// 5515 // protein binding // inferred from physical interaction /// 5215 // transporter activity // inferred from electro…	6810 // transport // inferred from sequence or structural similarity /// 6812 // cation transport // inferred from electronic annotation /// 6814 // sodium ion transport // inferred from electronic annotation /// 6821 // chloride transport // inferred from electronic annotation /// 6865 // amino acid transport // inferred from electronic annotation /// 6810 // transport // inferred from electroni…	16020 // membrane // inferred from electronic annotation /// 16021 // integral to membrane // inferred from electronic annotation	IPR004841 // Amino acid permease-associated region // 1.5E-103 /// IPR004841 // Amino acid permease-associated region // 1.5E-103
1834	143033_at	-0.686053	1.2656	-7.62763	1.2144e-08	4.75242e-07	9.77929	FBgn0001089	CG9092	Gal	galactosidase	33839	4565 // beta-galactosidase activity // inferred from direct assay /// 4565 // beta-galactosidase activity // inferred from sequence or structural similarity /// 4565 // beta-galactosidase activity // inferred from electronic annotation /// 4565 // beta-galactosidase activity // inferred from sequence similarity	5975 // carbohydrate metabolism // inferred from electronic annotation	5764 // lysosome // inferred from sequence or structural similarity /// 9341 // beta-galactosidase complex // inferred from electronic annotation /// 5764 // lysosome // inferred from sequence similarity	IPR001944 // Glycoside hydrolase, family 35 // 5.1E-100 /// IPR001944 // Glycoside hydrolase, family 35 // 2.3E-8
8973	150172_at	-0.552471	0.245082	-7.62831	1.21214e-08	4.75242e-07	9.78113	FBgn0026239	CG31043	gukh	GUK-holder	53563	---	8104 // protein localization // inferred from mutant phenotype	42734 // presynaptic membrane // inferred from direct assay	---
3018	144217_at	-0.656444	0.793697	-7.62323	1.229e-08	4.76839e-07	9.76746	FBgn0028485	CG4272	CG4272	CG4272	33419	5515 // protein binding // inferred from physical interaction	---	---	---
5491	146690_at	-0.523969	1.22803	-7.62109	1.23619e-08	4.76839e-07	9.76169	FBgn0010482	CG9432	l(2)01289	lethal (2) 01289	46017	3756 // protein disulfide isomerase activity // inferred from sequence or structural similarity /// 3756 // protein disulfide isomerase activity // inferred from sequence similarity	6118 // electron transport // inferred from electronic annotation	5886 // plasma membrane // inferred from sequence or structural similarity /// 5886 // plasma membrane // inferred from sequence similarity	IPR006662 // Thioredoxin type domain // 3.2 /// IPR006662 // Thioredoxin type domain // 1.4 /// IPR006662 // Thioredoxin type domain // 9.8 /// IPR006662 // Thioredoxin type domain // 1.4 /// IPR006662 // Thioredoxin type domain // 8.8 /// IPR006662 // Thioredoxin type domain // 8.2 /// IPR006662 // Thioredoxin type domain // 16.0 /// IPR006662 // Thioredoxin type domain // 0.4
9671	150870_at	-0.453111	0.947815	-7.61927	1.2423e-08	4.76839e-07	9.75681	FBgn0039742	CG15528	CG15528	CG15528	43575	8138 // protein tyrosine/serine/threonine phosphatase activity // non-traceable author statement /// 19210 // kinase inhibitor activity // inferred from electronic annotation	6470 // protein amino acid dephosphorylation // non-traceable author statement /// 7242 // intracellular signaling cascade // inferred from electronic annotation	---	IPR000340 // Dual specificity protein phosphatase // 5.3E-46
9973	151172_at	-0.511064	-0.0600187	-7.61948	1.24161e-08	4.76839e-07	9.75736	---	---	---	---	---	---	---	---	---
11404	152603_at	-0.584394	2.3779	-7.62429	1.22549e-08	4.76839e-07	9.77029	FBgn0030731	CG3415	CG3415	CG3415	32582	4197 // cysteine-type endopeptidase activity // inferred from electronic annotation /// 4303 // estradiol 17-beta-dehydrogenase activity // inferred from sequence or structural similarity /// 5515 // protein binding // inferred from physical interaction /// 16491 // oxidoreductase activity // inferred from electronic annotation /// 4303 // estradiol 17-beta-dehydrogenase activity // inferred from…	6508 // proteolysis // inferred from electronic annotation /// 6633 // fatty acid biosynthesis // inferred from electronic annotation /// 8202 // steroid metabolism // inferred from electronic annotation /// 8152 // metabolism // inferred from electronic annotation	---	IPR002198 // Short-chain dehydrogenase/reductase SDR // 4.5E-47 /// IPR002539 // MaoC-like dehydratase // 2.5E-45
1459	142658_at	-0.359405	0.11273	-7.61645	1.25189e-08	4.77901e-07	9.7492	FBgn0010575	CG5580	sbb	scribbler	44027	3700 // transcription factor activity // non-traceable author statement /// 8270 // zinc ion binding // inferred from electronic annotation /// 3676 // nucleic acid binding // inferred from electronic annotation /// 46872 // metal ion binding // inferred from electronic annotation	122 // negative regulation of transcription from RNA polymerase II promoter // non-traceable author statement /// 7411 // axon guidance // inferred from mutant phenotype /// 7411 // axon guidance // non-traceable author statement /// 7412 // axon target recognition // inferred from mutant phenotype /// 8345 // larval locomotory behavior // inferred from mutant phenotype /// 8345 // larval locomot…	5634 // nucleus // inferred from direct assay /// 5634 // nucleus // non-traceable author statement /// 5634 // nucleus // inferred from electronic annotation	---
5602	146801_at	-0.570717	0.202602	-7.61704	1.24989e-08	4.77901e-07	9.75078	FBgn0033282	CG14755	CG14755	CG14755	35807	---	---	---	---
3550	144749_at	-0.619838	0.461851	-7.60277	1.29934e-08	4.89347e-07	9.71238	FBgn0052703	CG32703	CG32703	CG32703	31877	4674 // protein serine/threonine kinase activity // non-traceable author statement /// 4707 // MAP kinase activity // inferred from sequence or structural similarity /// 5524 // ATP binding // inferred from electronic annotation /// 5515 // protein binding // inferred from physical interaction /// 166 // nucleotide binding // inferred from electronic annotation /// 4672 // protein kinase activity…	165 // MAPKKK cascade // inferred from electronic annotation /// 6468 // protein amino acid phosphorylation // non-traceable author statement /// 6916 // anti-apoptosis // inferred from electronic annotation /// 8283 // cell proliferation // inferred from electronic annotation /// 6468 // protein amino acid phosphorylation // inferred from electronic annotation	---	IPR000719 // Protein kinase // 3.5E-80
6765	147964_at	-0.487607	0.468371	-7.60364	1.29626e-08	4.89347e-07	9.71473	FBgn0035194	CG9187	CG9187	CG9187	38136	5515 // protein binding // inferred from physical interaction	---	---	IPR005339 // Protein of unknown function UPF0080 // 3.0E-68
9935	151134_at	-0.542369	1.3325	-7.60396	1.29516e-08	4.89347e-07	9.71557	FBgn0040650	CG15456	CG15456	CG15456	50123	---	---	---	---
7236	148435_at	-0.596541	1.73252	-7.59992	1.30945e-08	4.90991e-07	9.70471	FBgn0035944	CG5021	CG5021	CG5021	39025	---	---	16021 // integral to membrane // non-traceable author statement /// 16020 // membrane // inferred from electronic annotation /// 16021 // integral to membrane // inferred from electronic annotation	IPR008564 // Eukaryotic protein of unknown function DUF846 // 5.6E-114 /// IPR008564 // Eukaryotic protein of unknown function DUF846 // 5.6E-114
4204	145403_at	-0.372754	0.368561	-7.57987	1.38295e-08	5.16669e-07	9.65066	FBgn0052529	CG32529	CG32529	CG32529	33000	3677 // DNA binding // inferred from electronic annotation	---	---	IPR001025 // Bromo adjacent region // 1.4E-15
9622	150821_at	-0.60529	0.0103323	-7.57613	1.3971e-08	5.20568e-07	9.64059	FBgn0039665	CG2310	CG2310	CG2310	43473	---	---	---	---
12193	153392_at	-0.604942	3.12174	-7.56954	1.42243e-08	5.28601e-07	9.6228	FBgn0042174	CG18854	CG18854	CG18854	59212	8440 // inositol trisphosphate 3-kinase activity // inferred from sequence or structural similarity /// 8440 // inositol trisphosphate 3-kinase activity // non-traceable author statement /// 5515 // protein binding // inferred from physical interaction /// 8440 // inositol trisphosphate 3-kinase activity // inferred from sequence similarity	---	---	---
2996	144195_at	-0.548763	1.13608	-7.56203	1.45186e-08	5.36689e-07	9.60254	FBgn0027841	CG7697	CstF-64	Cleavage stimulation factor 64 kilodalton subunit	42239	3729 // mRNA binding // inferred from sequence or structural similarity /// 166 // nucleotide binding // inferred from electronic annotation /// 3676 // nucleic acid binding // inferred from electronic annotation /// 3729 // mRNA binding // inferred from sequence similarity	6378 // mRNA polyadenylylation // inferred from electronic annotation /// 6379 // mRNA cleavage // inferred from sequence or structural similarity /// 6379 // mRNA cleavage // non-traceable author statement /// 6398 // histone mRNA 3'-end processing // inferred from electronic annotation /// 6379 // mRNA cleavage // inferred from sequence similarity	5848 // mRNA cleavage stimulating factor complex // inferred from sequence or structural similarity /// 5848 // mRNA cleavage stimulating factor complex // non-traceable author statement /// 5848 // mRNA cleavage stimulating factor complex // inferred from sequence similarity	IPR000504 // RNA-binding region RNP-1 (RNA recognition motif) // 1.3E-31
9711	150910_at	-0.530488	2.47901	-7.55573	1.477e-08	5.44547e-07	9.58555	FBgn0039802	CG1349	dj-1	dj-1	43652	3676 // nucleic acid binding // inferred from electronic annotation /// 3729 // mRNA binding // inferred from electronic annotation /// 3824 // catalytic activity // inferred from electronic annotation	6732 // coenzyme metabolism // inferred from electronic annotation /// 6766 // vitamin metabolism // inferred from electronic annotation /// 9110 // vitamin biosynthesis // inferred from electronic annotation /// 51189 // prosthetic group metabolism // inferred from electronic annotation	---	IPR002818 // ThiJ/PfpI // 5.4E-55
2838	144037_at	-0.795257	2.65315	-7.53306	1.57124e-08	5.76258e-07	9.52433	FBgn0024957	CG6342	Irp-1B	Iron regulatory protein 1B	41269	3729 // mRNA binding // inferred from sequence or structural similarity /// 3994 // aconitate hydratase activity // inferred from sequence or structural similarity /// 5506 // iron ion binding // inferred from sequence or structural similarity /// 5506 // iron ion binding // non-traceable author statement /// 3723 // RNA binding // inferred from electronic annotation /// 3994 // aconitate hydrata…	6099 // tricarboxylic acid cycle // inferred from electronic annotation /// 6447 // regulation of translational initiation by iron // non-traceable author statement /// 8652 // amino acid biosynthesis // inferred from electronic annotation /// 6508 // proteolysis // inferred from electronic annotation /// 8152 // metabolism // inferred from electronic annotation	16020 // membrane // inferred from electronic annotation	IPR000573 // Aconitate hydratase, C-terminal // 9.5E-56 /// IPR001030 // Aconitate hydratase, N-terminal // 1.0E-126
9197	150396_at	-0.453514	0.730547	-7.52405	1.61035e-08	5.85744e-07	9.5	FBgn0039014	CG6982	CG6982	CG6982	42691	5198 // structural molecule activity // inferred from electronic annotation	7163 // establishment and/or maintenance of cell polarity // non-traceable author statement	5923 // tight junction // inferred from electronic annotation /// 16020 // membrane // inferred from electronic annotation /// 16021 // integral to membrane // inferred from electronic annotation	---
13764	154963_at	-0.626544	2.32095	-7.52326	1.61383e-08	5.85744e-07	9.49786	FBgn0032783	CG10237	CG10237	CG10237	35222	5386 // carrier activity // inferred from electronic annotation /// 8431 // vitamin E binding // inferred from sequence or structural similarity /// 16918 // retinal binding // inferred from sequence or structural similarity /// 5215 // transporter activity // inferred from electronic annotation /// 8431 // vitamin E binding // inferred from sequence similarity /// 16918 // retinal binding // inf…	6732 // coenzyme metabolism // inferred from electronic annotation /// 6810 // transport // inferred from electronic annotation /// 51189 // prosthetic group metabolism // inferred from electronic annotation	5622 // intracellular // inferred from electronic annotation	IPR001251 // Cellular retinaldehyde-binding)/triple function, C-terminal // 3.3E-36 /// IPR001251 // Cellular retinaldehyde-binding)/triple function, C-terminal // 3.3E-36 /// IPR001251 // Cellular retinaldehyde-binding)/triple function, C-terminal // 3.3E-36
9297	150496_at	-0.576701	2.53042	-7.50454	1.6985e-08	6.10152e-07	9.44726	FBgn0039172	CG5677	CG5677	CG5677	42885	9003 // signal peptidase activity // inferred from sequence or structural similarity /// 9003 // signal peptidase activity // non-traceable author statement /// 8233 // peptidase activity // inferred from electronic annotation /// 9003 // signal peptidase activity // inferred from electronic annotation /// 16787 // hydrolase activity // inferred from electronic annotation /// 9003 // signal pepti…	6465 // signal peptide processing // inferred from sequence or structural similarity /// 6465 // signal peptide processing // non-traceable author statement /// 6508 // proteolysis // inferred from electronic annotation /// 6465 // signal peptide processing // inferred from electronic annotation /// 6465 // signal peptide processing // inferred from sequence similarity	5787 // signal peptidase complex // inferred from sequence or structural similarity /// 5787 // signal peptidase complex // non-traceable author statement /// 16021 // integral to membrane // inferred from electronic annotation /// 5783 // endoplasmic reticulum // inferred from electronic annotation /// 5787 // signal peptidase complex // inferred from electronic annotation /// 5792 // microsome …	IPR007653 // Signal peptidase 22 kDa subunit // 5.2E-115
6577	147776_at	-0.436389	-0.233353	-7.4916	1.75967e-08	6.26026e-07	9.41224	FBgn0034861	CG9815	CG9815	CG9815	37710	---	---	---	---
3149	144348_at	-0.480655	0.0727089	-7.48987	1.76801e-08	6.27084e-07	9.40756	FBgn0029531	CG13362	CG13362	CG13362	31018	5515 // protein binding // inferred from physical interaction	---	---	---
3852	145051_at	-0.45314	1.19457	-7.47439	1.84449e-08	6.44197e-07	9.36565	FBgn0030545	CG11590	CG11590	CG11590	32368	5215 // transporter activity // inferred from electronic annotation /// 8324 // cation transporter activity // inferred from electronic annotation	6810 // transport // inferred from electronic annotation /// 6811 // ion transport // inferred from electronic annotation /// 6812 // cation transport // inferred from electronic annotation /// 19725 // cell homeostasis // inferred from electronic annotation	---	IPR004323 // CutA1 divalent ion tolerance protein // 2.0E-65
12746	153945_at	-0.583112	2.82361	-7.47411	1.84589e-08	6.44197e-07	9.3649	FBgn0035252	CG7970	CG7970	CG7970	38205	5515 // protein binding // inferred from physical interaction	---	5778 // peroxisomal membrane // inferred from sequence or structural similarity /// 5829 // cytosol // inferred from direct assay /// 16021 // integral to membrane // inferred from electronic annotation /// 5778 // peroxisomal membrane // inferred from sequence similarity	---
5036	146235_at	-0.505898	-0.508398	-7.46991	1.86724e-08	6.49131e-07	9.35352	FBgn0032351	CG33305	CG33305	CG33305	2768935	---	---	---	---
43	141242_at	-0.781757	1.27341	-7.46874	1.87321e-08	6.49543e-07	9.35036	FBgn0034388 /// FBgn0054020	CG15092	CG15092 /// CG34020	CG15092 /// CG34020	37164 /// 3885593	5515 // protein binding // inferred from physical interaction	---	---	---
12911	154110_at	-0.870012	3.73732	-7.46245	1.90573e-08	6.57617e-07	9.33332	FBgn0035811	CG12262	CG12262	CG12262	38864	3995 // acyl-CoA dehydrogenase activity // inferred from sequence or structural similarity /// 5515 // protein binding // inferred from physical interaction /// 3995 // acyl-CoA dehydrogenase activity // inferred from electronic annotation /// 16491 // oxidoreductase activity // inferred from electronic annotation /// 3995 // acyl-CoA dehydrogenase activity // inferred from sequence similarity	6118 // electron transport // inferred from electronic annotation /// 6635 // fatty acid beta-oxidation // inferred from sequence or structural similarity /// 6637 // acyl-CoA metabolism // inferred from electronic annotation /// 6629 // lipid metabolism // inferred from electronic annotation /// 6631 // fatty acid metabolism // inferred from electronic annotation /// 6635 // fatty acid beta-oxid…	5739 // mitochondrion // inferred from sequence or structural similarity /// 5759 // mitochondrial matrix // inferred from sequence or structural similarity /// 5739 // mitochondrion // inferred from electronic annotation /// 5739 // mitochondrion // inferred from sequence similarity /// 5759 // mitochondrial matrix // inferred from sequence similarity	IPR006090 // Acyl-CoA dehydrogenase, C-terminal // 1.3E-76 /// IPR006091 // Acyl-CoA dehydrogenase, central domain // 2.5E-66 /// IPR006092 // Acyl-CoA dehydrogenase, N-terminal // 1.9E-40
6746	147945_at	-0.413789	-0.148469	-7.45802	1.92899e-08	6.62381e-07	9.32131	FBgn0035168	CG13889	CG13889	CG13889	38099	4601 // peroxidase activity // inferred from electronic annotation /// 5200 // structural constituent of cytoskeleton // inferred from electronic annotation	6979 // response to oxidative stress // inferred from electronic annotation	---	---
10627	151826_at	-0.744126	3.79652	-7.45631	1.93803e-08	6.63857e-07	9.31669	FBgn0037913	CG6783	CG6783	CG6783	3772232	5215 // transporter activity // inferred from electronic annotation /// 5504 // fatty acid binding // inferred from sequence or structural similarity /// 5488 // binding // inferred from electronic annotation /// 8289 // lipid binding // inferred from electronic annotation /// 5504 // fatty acid binding // inferred from sequence similarity	6810 // transport // inferred from electronic annotation	5743 // mitochondrial inner membrane // inferred from electronic annotation /// 16020 // membrane // inferred from electronic annotation /// 16021 // integral to membrane // inferred from electronic annotation	IPR000566 // Lipocalin-related protein and Bos/Can/Equ allergen // 1.6E-36
4538	145737_at	-0.620345	0.0365104	-7.45229	1.95952e-08	6.67952e-07	9.30577	FBgn0051772	CG31772	CG31772	CG31772	33601	5515 // protein binding // inferred from electronic annotation	---	---	IPR001478 // PDZ/DHR/GLGF domain // 1.6E-11 /// IPR001849 // Pleckstrin-like // 6.2E-21 /// IPR001849 // Pleckstrin-like // 9.4E-23
1220	142419_at	-1.49529	2.49854	-7.44408	2.00406e-08	6.81478e-07	9.28353	FBgn0030098	CG12057	CG12057	CG12057	31854	---	---	---	---
2604	143803_at	-0.636163	0.706149	-7.43035	2.08094e-08	7.05907e-07	9.24627	FBgn0015359	CG2034	CG2034	CG2034	38287	5515 // protein binding // inferred from physical interaction	---	---	---
2740	143939_at	-0.634457	0.818686	-7.42093	2.13538e-08	7.18676e-07	9.22071	FBgn0020645	CG7287	Lcp65Aa	Lcp65Aa	38709	8010 // structural constituent of larval cuticle (sensu Insecta) // inferred from sequence or structural similarity /// 8010 // structural constituent of larval cuticle (sensu Insecta) // inferred from sequence similarity	---	---	IPR000618 // Insect cuticle protein // 1.2E-29
7666	148865_at	-0.555019	1.16799	-7.42029	2.1391e-08	7.18676e-07	9.21899	FBgn0036592	CG13049	CG13049	CG13049	39788	---	---	---	---
4221	145420_at	-0.64254	1.46433	-7.41861	2.14896e-08	7.20263e-07	9.21444	FBgn0031103	CG12679	CG12679	CG12679	33031	5515 // protein binding // inferred from physical interaction	---	---	---
4597	145796_at	-1.43901	0.958421	-7.39823	2.27259e-08	7.5807e-07	9.15908	FBgn0031654	CG8869	Jon25Bii	Jonah 25Bii	33707	4252 // serine-type endopeptidase activity // non-traceable author statement /// 4263 // chymotrypsin activity // inferred from sequence or structural similarity /// 4295 // trypsin activity // inferred from electronic annotation /// 4252 // serine-type endopeptidase activity // inferred from electronic annotation /// 4263 // chymotrypsin activity // inferred from sequence similarity	6508 // proteolysis // non-traceable author statement /// 6508 // proteolysis // inferred from electronic annotation	---	IPR001254 // Peptidase S1, chymotrypsin // 1.1E-57
10253	151452_at	-1.17604	2.73759	-7.39404	2.29888e-08	7.65019e-07	9.1477	FBgn0040993	CG17325	CG17325	CG17325	50467	5515 // protein binding // inferred from physical interaction	---	---	---
9033	150232_at	-0.596943	0.764467	-7.39036	2.32223e-08	7.70958e-07	9.13769	FBgn0038755	CG4451	Hs6st	Heparan sulfate 6-O-sulfotransferase	42380	17095 // heparan sulfate 6-O-sulfotransferase activity // non-traceable author statement /// 5515 // protein binding // inferred from physical interaction /// 16740 // transferase activity // inferred from electronic annotation	7428 // primary tracheal branching (sensu Insecta) // traceable author statement /// 8543 // fibroblast growth factor receptor signaling pathway // traceable author statement /// 15012 // heparan sulfate proteoglycan biosynthesis // traceable author statement	---	IPR010635 // Heparan sulphate 6-sulfotransferase // 1.0E-126
1772	142971_at	-0.674876	2.07051	-7.38948	2.32784e-08	7.70992e-07	9.13531	FBgn0003638	CG3019	su(w<up>a</up>)	suppressor of white-apricot	31054	3723 // RNA binding // inferred from electronic annotation	398 // nuclear mRNA splicing, via spliceosome // non-traceable author statement /// 398 // nuclear mRNA splicing, via spliceosome // inferred from electronic annotation /// 6350 // transcription // inferred from electronic annotation /// 6355 // regulation of transcription, DNA-dependent // inferred from electronic annotation /// 6396 // RNA processing // inferred from electronic annotation /// 6…	5634 // nucleus // non-traceable author statement /// 5681 // spliceosome complex // non-traceable author statement /// 5634 // nucleus // inferred from electronic annotation	IPR000061 // SWAP/Surp // 4.8E-22 /// IPR000061 // SWAP/Surp // 1.9E-20
4187	145386_at	-0.43033	0.189785	-7.3854	2.35402e-08	7.77825e-07	9.12424	FBgn0031051	CG12234	Ranbp21	Ranbp21	32970	8536 // Ran GTPase binding // non-traceable author statement /// 8565 // protein transporter activity // inferred from electronic annotation /// 5515 // protein binding // inferred from physical interaction /// 5488 // binding // inferred from electronic annotation	59 // protein import into nucleus, docking // inferred from electronic annotation	5634 // nucleus // inferred from electronic annotation /// 5643 // nuclear pore // inferred from electronic annotation /// 5737 // cytoplasm // inferred from electronic annotation	IPR001494 // Importin-beta, N-terminal // 2.2E-17
2597	143796_at	-0.489474	0.975602	-7.38436	2.36075e-08	7.78216e-07	9.12141	FBgn0015316	CG9564	Try29F	Trypsin 29F	34226	4263 // chymotrypsin activity // inferred from electronic annotation /// 4295 // trypsin activity // inferred from sequence or structural similarity /// 4295 // trypsin activity // non-traceable author statement /// 8233 // peptidase activity // inferred from electronic annotation /// 8236 // serine-type peptidase activity // inferred from electronic annotation /// 4252 // serine-type endopeptida…	6508 // proteolysis // non-traceable author statement /// 6508 // proteolysis // inferred from electronic annotation	---	IPR001254 // Peptidase S1, chymotrypsin // 7.3E-89
9176	150375_at	-0.820326	1.11284	-7.37107	2.44857e-08	8.01505e-07	9.08527	FBgn0038983	CG5326	CG5326	CG5326	42655	8415 // acyltransferase activity // inferred from electronic annotation /// 16740 // transferase activity // inferred from electronic annotation	6629 // lipid metabolism // inferred from electronic annotation /// 6631 // fatty acid metabolism // inferred from electronic annotation	16021 // integral to membrane // inferred from electronic annotation	IPR002076 // GNS1/SUR4 membrane protein // 1.0E-6 /// IPR002076 // GNS1/SUR4 membrane protein // 1.8E-8
2279	143478_at	-0.442831	0.614887	-7.35733	2.5428e-08	8.24399e-07	9.04789	FBgn0004516	CG14994	Gad1	Glutamic acid decarboxylase 1	38484	4351 // glutamate decarboxylase activity // inferred from direct assay /// 4351 // glutamate decarboxylase activity // inferred from sequence or structural similarity /// 4351 // glutamate decarboxylase activity // non-traceable author statement /// 5515 // protein binding // inferred from physical interaction /// 4351 // glutamate decarboxylase activity // inferred from electronic annotation ///…	6538 // glutamate catabolism // inferred from mutant phenotype /// 6538 // glutamate catabolism // non-traceable author statement /// 7416 // synaptogenesis // inferred from mutant phenotype /// 7528 // neuromuscular junction development // inferred from mutant phenotype /// 8345 // larval locomotory behavior // inferred from mutant phenotype /// 9449 // gamma-aminobutyric acid biosynthesis // in…	---	IPR002129 // Pyridoxal-dependent decarboxylase // 1.0E-126
5173	146372_at	-0.433264	3.32736	-7.35003	2.59436e-08	8.35564e-07	9.02802	FBgn0032596	CG17331	CG17331	CG17331	34999	4175 // endopeptidase activity // inferred from sequence or structural similarity /// 5515 // protein binding // inferred from physical interaction /// 4175 // endopeptidase activity // inferred from electronic annotation /// 4298 // threonine endopeptidase activity // inferred from electronic annotation /// 8233 // peptidase activity // inferred from electronic annotation /// 16787 // hydrolase …	6508 // proteolysis // inferred from electronic annotation /// 6511 // ubiquitin-dependent protein catabolism // inferred from electronic annotation /// 50875 // cellular physiological process // inferred from mutant phenotype	5839 // proteasome core complex (sensu Eukaryota) // inferred from sequence or structural similarity /// 5829 // cytosol // inferred from electronic annotation /// 5839 // proteasome core complex (sensu Eukaryota) // inferred from electronic annotation /// 43234 // protein complex // inferred from electronic annotation /// 5839 // proteasome core complex (sensu Eukaryota) // inferred from sequenc…	IPR001353 // Peptidase T1, 20S proteasome // 2.0E-48
2311	143510_at	-0.801597	0.930483	-7.34343	2.64192e-08	8.47769e-07	9.01004	FBgn0004778	CG1331	Ccp84Af	Ccp84Af	40820	8010 // structural constituent of larval cuticle (sensu Insecta) // inferred from sequence or structural similarity /// 8010 // structural constituent of larval cuticle (sensu Insecta) // inferred from sequence similarity	---	---	IPR000618 // Insect cuticle protein // 5.8E-28
2142	143341_at	-0.896907	2.38511	-7.33686	2.69011e-08	8.54614e-07	8.99215	FBgn0003358	CG31039	Jon99Ci	Jonah 99Ci	43545	4252 // serine-type endopeptidase activity // inferred from sequence or structural similarity /// 4252 // serine-type endopeptidase activity // non-traceable author statement /// 4263 // chymotrypsin activity // inferred from electronic annotation /// 4295 // trypsin activity // inferred from electronic annotation /// 42708 // elastase activity // non-traceable author statement /// 4252 // serine…	6508 // proteolysis // non-traceable author statement /// 7586 // digestion // non-traceable author statement /// 6508 // proteolysis // inferred from electronic annotation	---	IPR001254 // Peptidase S1, chymotrypsin // 4.8E-60
3163	144362_at	-0.512846	0.67197	-7.33806	2.6812e-08	8.54614e-07	8.99544	FBgn0029552	CG14631	CG14631	CG14631	31049	---	---	---	---
7619	148818_at	-0.607729	1.22562	-7.33721	2.68749e-08	8.54614e-07	8.99312	---	---	---	---	---	---	---	---	---
1227	142426_at	-0.375914	0.69871	-7.32867	2.75139e-08	8.70135e-07	8.96986	FBgn0031850	CG11326	Tsp	Thrombospondin	33941	5198 // structural molecule activity // inferred from electronic annotation /// 5509 // calcium ion binding // inferred from electronic annotation /// 5515 // protein binding // inferred from physical interaction	7155 // cell adhesion // inferred from electronic annotation /// 7155 // cell adhesion // inferred from sequence or structural similarity /// 7155 // cell adhesion // inferred from sequence similarity	5578 // extracellular matrix (sensu Metazoa) // inferred from sequence or structural similarity /// 16020 // membrane // inferred from electronic annotation /// 5576 // extracellular region // inferred from electronic annotation /// 5578 // extracellular matrix (sensu Metazoa) // inferred from sequence similarity	IPR006209 // EGF-like domain // 3.8E-5 /// IPR003367 // Thrombospondin type 3 repeat // 13.0 /// IPR003367 // Thrombospondin type 3 repeat // 0.045 /// IPR003367 // Thrombospondin type 3 repeat // 0.71 /// IPR003367 // Thrombospondin type 3 repeat // 0.0021 /// IPR003367 // Thrombospondin type 3 repeat // 0.0026 /// IPR003367 // Thrombospondin type 3 repeat // 0.12 /// IPR003367 // Thrombospondin…
4282	145481_at	-0.419928	0.764337	-7.31955	2.82137e-08	8.86264e-07	8.94501	FBgn0031183	CG14621	CG14621	CG14621	33128	8524 // glucose 6-phosphate:phosphate antiporter activity // inferred from sequence or structural similarity /// 8524 // glucose 6-phosphate:phosphate antiporter activity // inferred from sequence similarity	5975 // carbohydrate metabolism // inferred from electronic annotation /// 8643 // carbohydrate transport // inferred from electronic annotation	---	---
8594	149793_at	-0.445362	-0.357529	-7.3145	2.86088e-08	8.96665e-07	8.93124	FBgn0038073	CG14395	CG14395	CG14395	41560	---	---	---	---
8118	149317_at	-0.489561	0.506851	-7.31133	2.88593e-08	8.99375e-07	8.92261	FBgn0037308	CG31543	Hph	HIF prolyl hydroxylase	40633	16706 // oxidoreductase activity, acting on paired donors, with incorporation or reduction of molecular oxygen, 2-oxoglutarate as one donor, and incorporation of one atom each of oxygen into both donors // inferred from electronic annotation /// 31545 // peptidyl-proline 4-dioxygenase activity // inferred from sequence or structural similarity /// 5515 // protein binding // inferred from physical…	1666 // response to hypoxia // inferred from mutant phenotype /// 7424 // tracheal system development (sensu Insecta) // non-traceable author statement /// 8104 // protein localization // inferred from mutant phenotype /// 19538 // protein metabolism // inferred from electronic annotation	---	IPR002893 // Zn-finger, MYND type // 1.6E-16 /// IPR005123 // 2OG-Fe(II) oxygenase superfamily // 7.5E-16
8489	149688_at	-0.524701	0.420455	-7.31017	2.8952e-08	8.99375e-07	8.91944	FBgn0037902	CG5281	CG5281	CG5281	41375	---	---	---	IPR000620 // Protein of unknown function DUF6 // 2.7E-13
7116	148315_at	-0.493819	0.237539	-7.30812	2.91162e-08	9.00482e-07	8.91384	FBgn0052387	CG32387	CG32387	CG32387	38788	---	7156 // homophilic cell adhesion // inferred from sequence or structural similarity /// 7398 // ectoderm development // inferred from electronic annotation /// 7399 // nervous system development // inferred from electronic annotation /// 8283 // cell proliferation // inferred from electronic annotation /// 7156 // homophilic cell adhesion // inferred from sequence similarity	---	IPR003961 // Fibronectin, type III // 1.9E-17 /// IPR003961 // Fibronectin, type III // 4.9E-14 /// IPR003961 // Fibronectin, type III // 2.3E-13 /// IPR003961 // Fibronectin, type III // 2.8E-17 /// IPR003961 // Fibronectin, type III // 4.8E-15 /// IPR003961 // Fibronectin, type III // 5.4E-6 /// IPR007110 // Immunoglobulin-like // 0.0018 /// IPR007110 // Immunoglobulin-like // 1.2E-7 /// IPR007…
7087	148286_at	-0.473534	0.875874	-7.30002	2.97732e-08	9.16754e-07	8.89176	FBgn0035708	CG8398	CG8398	CG8398	38741	---	---	---	---
4596	145795_at	-1.64413	3.11998	-7.29866	2.98844e-08	9.18158e-07	8.88807	FBgn0031653	CG8871	Jon25Biii	Jonah 25Biii	33706	4263 // chymotrypsin activity // inferred from electronic annotation /// 4295 // trypsin activity // inferred from electronic annotation /// 8236 // serine-type peptidase activity // inferred from electronic annotation /// 42708 // elastase activity // non-traceable author statement /// 4252 // serine-type endopeptidase activity // inferred from electronic annotation /// 8233 // peptidase activit…	6508 // proteolysis // non-traceable author statement /// 6508 // proteolysis // inferred from electronic annotation	---	IPR001254 // Peptidase S1, chymotrypsin // 1.0E-43
10125	151324_at	-0.590102	1.07992	-7.27987	3.14738e-08	9.62769e-07	8.83678	FBgn0040851	CG12626	CG12626	CG12626	50324	---	---	---	---
2736	143935_s_at	-0.50232	0.339164	-7.26292	3.29804e-08	9.91535e-07	8.79051	FBgn0020637 /// FBgn0042120 /// FBgn0020638	CG18779 /// CG10534 /// CG10530	Lcp65Ag2 /// CG18779 /// Lcp65Ag1	Lcp65Ag2 /// CG18779 /// Lcp65Ag1	38702 /// 38703 /// 59159	8010 // structural constituent of larval cuticle (sensu Insecta) // inferred from sequence or structural similarity /// 8010 // structural constituent of larval cuticle (sensu Insecta) // non-traceable author statement /// 5515 // protein binding // inferred from physical interaction /// 5198 // structural molecule activity // inferred from electronic annotation /// 42302 // structural constituen…	8363 // larval cuticle biosynthesis (sensu Insecta) // non-traceable author statement	5576 // extracellular region // non-traceable author statement	IPR000618 // Insect cuticle protein // 4.4E-31 /// IPR000618 // Insect cuticle protein // 2.3E-31
4014	145213_at	-0.608433	0.58908	-7.26356	3.29218e-08	9.91535e-07	8.79227	FBgn0030791	CG9132	CG9132	CG9132	2768881	5515 // protein binding // inferred from sequence or structural similarity /// 5515 // protein binding // inferred from sequence similarity	6897 // endocytosis // inferred from sequence or structural similarity /// 6810 // transport // inferred from electronic annotation /// 6897 // endocytosis // inferred from electronic annotation /// 15031 // protein transport // inferred from electronic annotation /// 6897 // endocytosis // inferred from sequence similarity	5905 // coated pit // inferred from sequence or structural similarity /// 30125 // clathrin vesicle coat // inferred from sequence or structural similarity /// 16020 // membrane // inferred from electronic annotation /// 5905 // coated pit // inferred from sequence similarity /// 30125 // clathrin vesicle coat // inferred from sequence similarity	---
491	141690_at	-0.468311	0.813453	-7.25558	3.36551e-08	1.00965e-06	8.77047	FBgn0032361	CG6488	CG6488	CG6488	34571	5515 // protein binding // inferred from physical interaction	6810 // transport // inferred from electronic annotation /// 15031 // protein transport // inferred from electronic annotation	5795 // Golgi stack // inferred from electronic annotation /// 16020 // membrane // inferred from electronic annotation	IPR007255 // Dor1-like protein // 1.0E-126
116	141315_at	-1.00203	4.29463	-7.2468	3.44812e-08	1.03002e-06	8.74647	FBgn0040732	CG16926	CG16926	CG16926	50205	5515 // protein binding // inferred from physical interaction	---	---	---
9585	150784_at	-0.485218	1.00329	-7.24062	3.50751e-08	1.04554e-06	8.72957	FBgn0039598	CG14061	CG14061	CG14061	43396	4252 // serine-type endopeptidase activity // inferred from electronic annotation	6508 // proteolysis // inferred from electronic annotation	---	---
3653	144852_at	-0.458088	1.37783	-7.2365	3.5476e-08	1.05524e-06	8.71832	FBgn0030271	CG15202	CG15202	CG15202	32052	---	---	---	---
965	142164_at	-0.648157	2.32364	-7.2264	3.64798e-08	1.08219e-06	8.69071	FBgn0031244	CG11601	CG11601	CG11601	33197	5515 // protein binding // inferred from physical interaction	---	---	IPR006838 // FAR-17a/AIG1-like protein // 2.3E-116
4410	145609_at	-0.337358	-0.222048	-7.22584	3.65363e-08	1.08219e-06	8.68917	FBgn0031375	CG31670	CG31670	CG31670	326152	3676 // nucleic acid binding // inferred from electronic annotation /// 5509 // calcium ion binding // inferred from electronic annotation /// 8270 // zinc ion binding // inferred from electronic annotation /// 30528 // transcription regulator activity // inferred from electronic annotation	6139 // nucleobase, nucleoside, nucleotide and nucleic acid metabolism // inferred from electronic annotation /// 6357 // regulation of transcription from RNA polymerase II promoter // inferred from electronic annotation /// 6366 // transcription from RNA polymerase II promoter // inferred from electronic annotation /// 8283 // cell proliferation // inferred from electronic annotation	5634 // nucleus // inferred from electronic annotation	IPR007087 // Zn-finger, C2H2 type // 1.1E-4 /// IPR007087 // Zn-finger, C2H2 type // 2.9E-6 /// IPR007087 // Zn-finger, C2H2 type // 3.4E-6 /// IPR007087 // Zn-finger, C2H2 type // 1.2E-5 /// IPR007087 // Zn-finger, C2H2 type // 2.1E-4 /// IPR007087 // Zn-finger, C2H2 type // 6.7E-5
3318	144517_at	-0.70279	-0.00672208	-7.22278	3.68473e-08	1.0868e-06	8.68079	FBgn0029761	CG10706	SK	small conductance calcium-activated potassium channel	31456	4623 // phospholipase A2 activity // inferred from electronic annotation /// 4965 // GABA-B receptor activity // inferred from electronic annotation /// 5249 // voltage-gated potassium channel activity // inferred from electronic annotation /// 5509 // calcium ion binding // inferred from electronic annotation /// 5516 // calmodulin binding // inferred from electronic annotation /// 15269 // calc…	6812 // cation transport // inferred from electronic annotation /// 6813 // potassium ion transport // inferred from electronic annotation /// 7268 // synaptic transmission // inferred from electronic annotation /// 16042 // lipid catabolism // inferred from electronic annotation	8076 // voltage-gated potassium channel complex // inferred from electronic annotation /// 16020 // membrane // inferred from electronic annotation /// 16021 // integral to membrane // inferred from electronic annotation	IPR003931 // Calcium-activated SK potassium channel // 1.1E-78 /// IPR004178 // Calmodulin binding domain // 1.8E-52 /// IPR004178 // Calmodulin binding domain // 8.0E-34
13580	154779_at	-0.387175	1.81609	-7.21995	3.71364e-08	1.09303e-06	8.67305	FBgn0039234	CG7012	nct	nicastrin	42964	---	6509 // membrane protein ectodomain proteolysis // inferred from mutant phenotype /// 6509 // membrane protein ectodomain proteolysis // non-traceable author statement /// 7010 // cytoskeleton organization and biogenesis // inferred from mutant phenotype /// 7219 // Notch signaling pathway // inferred from mutant phenotype /// 7219 // Notch signaling pathway // non-traceable author statement /// …	5886 // plasma membrane // non-traceable author statement /// 16021 // integral to membrane // non-traceable author statement /// 16020 // membrane // inferred from electronic annotation /// 16021 // integral to membrane // inferred from electronic annotation	IPR008710 // Nicastrin // 1.0E-126 /// IPR008710 // Nicastrin // 1.0E-126
12533	153732_at	-0.531516	0.966533	-7.21066	3.81027e-08	1.11912e-06	8.64763	FBgn0030539	CG1368	CG1368	CG1368	32361	5213 // structural constituent of chorion (sensu Insecta) // inferred from sequence or structural similarity /// 5213 // structural constituent of chorion (sensu Insecta) // inferred from sequence similarity	---	---	IPR004019 // YLP motif // 0.088 /// IPR004019 // YLP motif // 0.088
369	141568_at	-0.779922	2.75306	-7.20113	3.91205e-08	1.14421e-06	8.62154	FBgn0030362	CG1803	regucalcin	regucalcin	32165	5515 // protein binding // inferred from physical interaction /// 4801 // transaldolase activity // inferred from electronic annotation /// 16740 // transferase activity // inferred from electronic annotation	9948 // anterior/posterior axis specification // inferred from electronic annotation /// 19722 // calcium-mediated signaling // inferred from electronic annotation /// 5975 // carbohydrate metabolism // inferred from electronic annotation /// 6098 // pentose-phosphate shunt // inferred from electronic annotation	5737 // cytoplasm // inferred from electronic annotation	IPR005511 // Senescence marker protein-30 (SMP-30) // 1.0E-126 /// IPR005511 // Senescence marker protein-30 (SMP-30) // 1.0E-126
8427	149626_at	-0.551449	0.182575	-7.19328	3.99799e-08	1.16449e-06	8.60004	FBgn0037804	CG11870	CG11870	CG11870	41256	4674 // protein serine/threonine kinase activity // non-traceable author statement /// 4702 // receptor signaling protein serine/threonine kinase activity // inferred from electronic annotation /// 4713 // protein-tyrosine kinase activity // inferred from electronic annotation /// 5524 // ATP binding // inferred from electronic annotation /// 166 // nucleotide binding // inferred from electronic …	6468 // protein amino acid phosphorylation // non-traceable author statement /// 7010 // cytoskeleton organization and biogenesis // inferred from electronic annotation /// 7242 // intracellular signaling cascade // inferred from electronic annotation /// 6468 // protein amino acid phosphorylation // inferred from electronic annotation	---	IPR000719 // Protein kinase // 5.0E-99
8740	149939_at	-0.56419	0.40945	-7.18851	4.05107e-08	1.17263e-06	8.58698	FBgn0038295	CG4154	Gyc88E	Guanylyl cyclase at 88E	41825	3677 // DNA binding // inferred from electronic annotation /// 4383 // guanylate cyclase activity // inferred from direct assay /// 4383 // guanylate cyclase activity // inferred from sequence or structural similarity /// 4383 // guanylate cyclase activity // non-traceable author statement /// 5524 // ATP binding // inferred from electronic annotation /// 46933 // hydrogen-transporting ATP syntha…	6182 // cGMP biosynthesis // Unknown /// 6306 // DNA methylation // inferred from electronic annotation /// 7186 // G-protein coupled receptor protein signaling pathway // inferred from electronic annotation /// 7263 // nitric oxide mediated signal transduction // inferred from electronic annotation /// 9187 // cyclic nucleotide metabolism // inferred from electronic annotation /// 15986 // ATP s…	8074 // guanylate cyclase complex, soluble // inferred from sequence or structural similarity /// 16469 // proton-transporting two-sector ATPase complex // inferred from electronic annotation /// 8074 // guanylate cyclase complex, soluble // inferred from sequence similarity	IPR001054 // Guanylate cyclase // 6.9E-81
1657	142856_at	-0.562672	1.35134	-7.18013	4.14609e-08	1.1952e-06	8.56404	FBgn0031895	CG4497	CG4497	CG4497	34001	---	---	---	---
3160	144359_at	-0.331312	-0.0383422	-7.17345	4.2235e-08	1.21252e-06	8.54573	FBgn0040342	CG3706	CG3706	CG3706	53540	---	---	---	---
5593	146792_at	-0.55308	4.5789	-7.16886	4.27764e-08	1.22305e-06	8.53313	FBgn0033268	CG2297	Obp44a	Obp44a	35789	5549 // odorant binding // inferred from electronic annotation	6810 // transport // inferred from electronic annotation	---	IPR006170 // Pheromone/general odorant binding protein, PBP/GOBP // 9.4E-32
6956	148155_at	-0.484914	0.156406	-7.16273	4.35085e-08	1.23642e-06	8.51633	FBgn0035511	CG15007	CG15007	CG15007	38509	8010 // structural constituent of larval cuticle (sensu Insecta) // inferred from sequence or structural similarity /// 42302 // structural constituent of cuticle // inferred from electronic annotation /// 8010 // structural constituent of larval cuticle (sensu Insecta) // inferred from sequence similarity	---	---	IPR000618 // Insect cuticle protein // 3.9E-31 /// IPR000618 // Insect cuticle protein // 3.9E-31
11607	152806_at	-0.569151	1.63552	-7.16342	4.34247e-08	1.23642e-06	8.51824	FBgn0053519	CG33519	CG33519	CG33519	3346201	5524 // ATP binding // inferred from electronic annotation /// 4672 // protein kinase activity // inferred from electronic annotation	6468 // protein amino acid phosphorylation // inferred from electronic annotation	---	IPR003961 // Fibronectin, type III // 2.8E-8 /// IPR003961 // Fibronectin, type III // 9.2E-14 /// IPR000719 // Protein kinase // 1.9E-51 /// IPR000719 // Protein kinase // 9.3E-42 /// IPR007110 // Immunoglobulin-like // 3.2 /// IPR007110 // Immunoglobulin-like // 7.8E-5 /// IPR007110 // Immunoglobulin-like // 2.2E-5 /// IPR007110 // Immunoglobulin-like // 0.1 /// IPR007110 // Immunoglobulin-like…
4877	146076_at	-0.53584	3.18758	-7.14425	4.57944e-08	1.27963e-06	8.46566	FBgn0040097	CG17011	lectin-30A	lectin-30A	53541	5534 // galactose binding // inferred from sequence or structural similarity /// 5534 // galactose binding // inferred from sequence similarity	7283 // spermatogenesis // inferred from electronic annotation	---	IPR001304 // C-type lectin // 2.0E-7
7475	148674_at	-0.655788	2.64472	-7.14381	4.5851e-08	1.27963e-06	8.46444	FBgn0036311	CG17666	CG17666	CG17666	39452	---	---	---	---
7652	148851_at	-0.555983	1.77917	-7.14647	4.55143e-08	1.27963e-06	8.47173	FBgn0036576	CG5151	CG5151	CG5151	39772	5515 // protein binding // inferred from physical interaction	---	---	---
8584	149783_at	-0.479638	0.900929	-7.146	4.5573e-08	1.27963e-06	8.47045	FBgn0038060	CG18554	CG18554	CG18554	41545	---	---	---	---
10924	152123_at	-0.457986	2.47716	-7.14588	4.55886e-08	1.27963e-06	8.47012	FBgn0038321	CG6218	CG6218	CG6218	41863	16301 // kinase activity // inferred from electronic annotation /// 19200 // carbohydrate kinase activity // inferred from electronic annotation /// 5515 // protein binding // inferred from physical interaction	5975 // carbohydrate metabolism // inferred from electronic annotation /// 5996 // monosaccharide metabolism // inferred from electronic annotation	---	IPR002731 // ATPase, BadF/BadG/BcrA/BcrD type // 1.4E-36
13967	AFFX-BioB-3_at	-0.765267	0.918562	-7.14124	4.61782e-08	1.2862e-06	8.4574	---	---	---	---	---	4015 // adenosylmethionine-8-amino-7-oxononanoate transaminase activity // inferred from electronic annotation /// 8483 // transaminase activity // inferred from electronic annotation /// 16740 // transferase activity // inferred from electronic annotation /// 30170 // pyridoxal phosphate binding // inferred from electronic annotation /// 3824 // catalytic activity // inferred from electronic ann…	9102 // biotin biosynthesis // inferred from electronic annotation /// 8152 // metabolism // inferred from electronic annotation /// 9058 // biosynthesis // inferred from electronic annotation /// 9236 // cobalamin biosynthesis // inferred from electronic annotation	---	---
9862	151061_at	-0.427272	-0.576437	-7.1252	4.82793e-08	1.33674e-06	8.41337	FBgn0040573	CG17208	CG17208	CG17208	50046	---	---	---	---
12084	153283_at	-0.527371	3.87704	-7.12524	4.82745e-08	1.33674e-06	8.41347	FBgn0019644	CG8189	ATPsyn-b	ATP synthase, subunit b	39143	8553 // hydrogen-exporting ATPase activity, phosphorylative mechanism // inferred from sequence or structural similarity /// 8553 // hydrogen-exporting ATPase activity, phosphorylative mechanism // non-traceable author statement /// 46933 // hydrogen-transporting ATP synthase activity, rotational mechanism // inferred from electronic annotation /// 46961 // hydrogen-transporting ATPase activity, …	15986 // ATP synthesis coupled proton transport // inferred from electronic annotation /// 15992 // proton transport // inferred from sequence or structural similarity /// 15992 // proton transport // non-traceable author statement /// 6810 // transport // inferred from electronic annotation /// 6811 // ion transport // inferred from electronic annotation /// 15992 // proton transport // inferred…	276 // proton-transporting ATP synthase complex, coupling factor F(o) (sensu Eukaryota) // inferred from sequence or structural similarity /// 16469 // proton-transporting two-sector ATPase complex // inferred from electronic annotation /// 5739 // mitochondrion // inferred from electronic annotation /// 45263 // proton-transporting ATP synthase complex, coupling factor F(o) // inferred from elec…	IPR008688 // Mitochondrial ATP synthase B chain // 5.9E-89 /// IPR008688 // Mitochondrial ATP synthase B chain // 1.0E-126
4046	145245_at	-0.849058	-0.367261	-7.1224	4.86565e-08	1.34334e-06	8.40567	FBgn0030842	CG8557	CG8557	CG8557	32729	5085 // guanyl-nucleotide exchange factor activity // inferred from electronic annotation	---	---	IPR000219 // DH domain // 7.1E-37 /// IPR000219 // DH domain // 7.1E-37
9024	150223_at	-0.545626	0.724978	-7.122	4.87094e-08	1.34334e-06	8.40459	FBgn0038740	CG4562	CG4562	CG4562	42362	166 // nucleotide binding // inferred from electronic annotation /// 5215 // transporter activity // inferred from sequence or structural similarity /// 5524 // ATP binding // inferred from electronic annotation /// 42626 // ATPase activity, coupled to transmembrane movement of substances // inferred from sequence or structural similarity /// 16887 // ATPase activity // inferred from electronic a…	6858 // extracellular transport // inferred from electronic annotation /// 6952 // defense response // inferred from electronic annotation /// 9636 // response to toxin // inferred from electronic annotation /// 6810 // transport // inferred from electronic annotation	16021 // integral to membrane // inferred from electronic annotation /// 43190 // ATP-binding cassette (ABC) transporter complex // inferred from sequence or structural similarity /// 16020 // membrane // inferred from electronic annotation /// 43190 // ATP-binding cassette (ABC) transporter complex // inferred from sequence similarity	IPR001140 // ABC transporter, transmembrane region // 5.5E-23 /// IPR001140 // ABC transporter, transmembrane region // 1.4E-24 /// IPR003439 // ABC transporter // 2.4E-49 /// IPR003439 // ABC transporter // 6.7E-45
9410	150609_at	-0.658731	0.825276	-7.11344	4.98805e-08	1.37294e-06	8.38108	FBgn0066101	CG31094	LpR1	LpR1	2768687	5041 // low-density lipoprotein receptor activity // inferred from sequence or structural similarity /// 5509 // calcium ion binding // inferred from electronic annotation /// 8034 // lipoprotein binding // inferred from sequence or structural similarity /// 5041 // low-density lipoprotein receptor activity // inferred from sequence similarity /// 8034 // lipoprotein binding // inferred from sequ…	8203 // cholesterol metabolism // inferred from sequence or structural similarity /// 42953 // lipoprotein transport // inferred from sequence or structural similarity /// 8203 // cholesterol metabolism // inferred from sequence similarity /// 42953 // lipoprotein transport // inferred from sequence similarity	16020 // membrane // inferred from sequence or structural similarity /// 16020 // membrane // inferred from electronic annotation /// 16020 // membrane // inferred from sequence similarity	IPR006209 // EGF-like domain // 2.5E-7 /// IPR002172 // Low density lipoprotein-receptor, class A // 6.5E-17 /// IPR002172 // Low density lipoprotein-receptor, class A // 2.0E-19 /// IPR002172 // Low density lipoprotein-receptor, class A // 4.1E-16 /// IPR002172 // Low density lipoprotein-receptor, class A // 4.2E-18 /// IPR002172 // Low density lipoprotein-receptor, class A // 1.6E-17 /// IPR002…
2965	144164_at	-0.399841	1.18881	-7.11212	5.00642e-08	1.37529e-06	8.37744	FBgn0026873	CG14802	MED18	Mediator complex subunit 18	31140	16455 // RNA polymerase II transcription mediator activity // inferred from direct assay	---	119 // mediator complex // inferred from direct assay	---
1203	142402_at	-0.688448	1.5392	-7.09422	5.26148e-08	1.43133e-06	8.32827	FBgn0037678	CG16749	CG16749	CG16749	41111	4252 // serine-type endopeptidase activity // inferred from sequence or structural similarity /// 4252 // serine-type endopeptidase activity // non-traceable author statement /// 4263 // chymotrypsin activity // inferred from electronic annotation /// 4295 // trypsin activity // inferred from electronic annotation /// 4252 // serine-type endopeptidase activity // inferred from electronic annotati…	6508 // proteolysis // non-traceable author statement /// 6508 // proteolysis // inferred from electronic annotation	---	IPR001254 // Peptidase S1, chymotrypsin // 5.2E-67
2860	144059_at	-0.373539	0.687905	-7.09459	5.25613e-08	1.43133e-06	8.32927	FBgn0025391	CG14808	Scg	Sarcoglycan	31129	8307 // structural constituent of muscle // inferred from sequence or structural similarity /// 5515 // protein binding // inferred from physical interaction /// 8307 // structural constituent of muscle // inferred from sequence similarity	6936 // muscle contraction // inferred from electronic annotation /// 7016 // cytoskeletal anchoring // inferred from sequence or structural similarity /// 7498 // mesoderm development // inferred from expression pattern /// 7010 // cytoskeleton organization and biogenesis // inferred from electronic annotation /// 7016 // cytoskeletal anchoring // inferred from sequence similarity	16012 // sarcoglycan complex // inferred from sequence or structural similarity /// 16012 // sarcoglycan complex // non-traceable author statement /// 16021 // integral to membrane // inferred from electronic annotation /// 16012 // sarcoglycan complex // inferred from electronic annotation /// 16012 // sarcoglycan complex // inferred from sequence similarity	IPR006875 // Sarcoglycan complex subunit protein // 1.0E-126
3361	144560_at	-0.506525	1.06961	-7.09269	5.28395e-08	1.43465e-06	8.32405	FBgn0029821	CG4020	CG4020	CG4020	31522	16491 // oxidoreductase activity // inferred from electronic annotation	---	---	IPR004262 // Male sterility protein // 2.7E-97
13857	155056_at	-0.600462	3.20874	-7.09139	5.30299e-08	1.43704e-06	8.32049	FBgn0023174	CG3329	Pros2	Proteasome 2 subunit	39628	4175 // endopeptidase activity // inferred from sequence or structural similarity /// 5515 // protein binding // inferred from physical interaction /// 4175 // endopeptidase activity // inferred from electronic annotation /// 4298 // threonine endopeptidase activity // inferred from electronic annotation /// 8233 // peptidase activity // inferred from electronic annotation /// 16787 // hydrolase …	6508 // proteolysis // inferred from electronic annotation /// 6511 // ubiquitin-dependent protein catabolism // inferred from electronic annotation	5839 // proteasome core complex (sensu Eukaryota) // inferred from sequence or structural similarity /// 5829 // cytosol // inferred from electronic annotation /// 5839 // proteasome core complex (sensu Eukaryota) // inferred from electronic annotation /// 43234 // protein complex // inferred from electronic annotation /// 5839 // proteasome core complex (sensu Eukaryota) // inferred from sequenc…	IPR001353 // Peptidase T1, 20S proteasome // 2.9E-73
7883	149082_at	-0.558867	0.696033	-7.08094	5.45937e-08	1.46806e-06	8.29173	FBgn0036924	CG7570	hale	hale-bopp	40183	5515 // protein binding // inferred from physical interaction	---	---	---
7935	149134_at	-0.636586	2.55981	-7.08132	5.4536e-08	1.46806e-06	8.29278	FBgn0037004	CG17637	CG17637	CG17637	40275	15144 // carbohydrate transporter activity // inferred from sequence or structural similarity /// 15520 // tetracycline:hydrogen antiporter activity // inferred from electronic annotation /// 15144 // carbohydrate transporter activity // inferred from sequence similarity	5975 // carbohydrate metabolism // inferred from electronic annotation /// 8643 // carbohydrate transport // inferred from electronic annotation /// 15904 // tetracycline transport // inferred from electronic annotation	16021 // integral to membrane // inferred from electronic annotation	---
8122	149321_at	-0.521585	0.674449	-7.07718	5.51663e-08	1.47721e-06	8.28141	FBgn0037312	CG11999	CG11999	CG11999	40637	5515 // protein binding // inferred from physical interaction	---	16020 // membrane // inferred from electronic annotation	IPR003608 // MIR domain // 5.0E-12 /// IPR003608 // MIR domain // 5.6E-15 /// IPR003608 // MIR domain // 1.7E-10
8551	149750_at	-0.371128	1.01456	-7.07303	5.58062e-08	1.4864e-06	8.26999	FBgn0038014	CG10041	CG10041	CG10041	41496	4252 // serine-type endopeptidase activity // inferred from sequence or structural similarity /// 4252 // serine-type endopeptidase activity // non-traceable author statement /// 4263 // chymotrypsin activity // inferred from electronic annotation /// 4295 // trypsin activity // inferred from electronic annotation /// 4252 // serine-type endopeptidase activity // inferred from electronic annotati…	6508 // proteolysis // non-traceable author statement /// 6508 // proteolysis // inferred from electronic annotation	---	IPR001254 // Peptidase S1, chymotrypsin // 5.5E-24
219	141418_at	-1.27177	3.59773	-7.04665	6.00543e-08	1.57558e-06	8.1974	FBgn0036024	CG18180	CG18180	CG18180	39125	4263 // chymotrypsin activity // non-traceable author statement /// 4295 // trypsin activity // inferred from electronic annotation /// 4252 // serine-type endopeptidase activity // inferred from electronic annotation	6508 // proteolysis // non-traceable author statement /// 6508 // proteolysis // inferred from electronic annotation	---	IPR001254 // Peptidase S1, chymotrypsin // 4.4E-46
8660	149859_at	-0.602226	-0.545913	-7.04496	6.0338e-08	1.57878e-06	8.19273	FBgn0038176	CG14366	CG14366	CG14366	41683	---	---	---	IPR001849 // Pleckstrin-like // 3.3E-24
10919	152118_at	-0.658729	0.978705	-7.03738	6.16238e-08	1.59879e-06	8.17187	FBgn0033327	CG8577	PGRP-SC1b	PGRP-SC1b	35861	5515 // protein binding // inferred from electronic annotation /// 8745 // N-acetylmuramoyl-L-alanine amidase activity // inferred from direct assay /// 42834 // peptidoglycan binding // inferred from direct assay /// 42834 // peptidoglycan binding // inferred from sequence or structural similarity /// 42834 // peptidoglycan binding // non-traceable author statement /// 42834 // peptidoglycan bin…	6952 // defense response // non-traceable author statement /// 9253 // peptidoglycan catabolism // inferred from electronic annotation /// 9253 // peptidoglycan catabolism // inferred from sequence or structural similarity /// 16045 // detection of bacteria // non-traceable author statement /// 45087 // innate immune response // inferred from sequence or structural similarity /// 45087 // innate …	5576 // extracellular region // inferred from sequence or structural similarity /// 5887 // integral to plasma membrane // non-traceable author statement /// 5576 // extracellular region // non-traceable author statement /// 5576 // extracellular region // inferred from sequence similarity	IPR002502 // N-acetylmuramoyl-L-alanine amidase, family 2 // 6.4E-63
6822	148021_at	-0.521686	0.655976	-7.01379	6.5809e-08	1.68861e-06	8.10685	FBgn0052311	CG33484	zormin	zormin	2769001	5200 // structural constituent of cytoskeleton // inferred from sequence or structural similarity /// 5200 // structural constituent of cytoskeleton // inferred from sequence similarity	6936 // muscle contraction // inferred from electronic annotation	16020 // membrane // inferred from electronic annotation	IPR002017 // Spectrin repeat // 0.02 /// IPR002017 // Spectrin repeat // 2.1E-4 /// IPR007110 // Immunoglobulin-like // 1.1E-7 /// IPR007110 // Immunoglobulin-like // 5.7E-9 /// IPR007110 // Immunoglobulin-like // 5.0E-4 /// IPR007110 // Immunoglobulin-like // 0.11 /// IPR007110 // Immunoglobulin-like // 0.68 /// IPR007110 // Immunoglobulin-like // 3.4E-5 /// IPR007110 // Immunoglobulin-like // 2…
3832	145031_at	-0.467272	1.25816	-7.0091	6.66748e-08	1.7077e-06	8.09391	FBgn0030520	CG10990	CG10990	CG10990	32337	3676 // nucleic acid binding // inferred from electronic annotation /// 3746 // translation elongation factor activity // inferred from electronic annotation /// 8135 // translation factor activity, nucleic acid binding // inferred from electronic annotation	6412 // protein biosynthesis // inferred from electronic annotation /// 6915 // apoptosis // inferred from electronic annotation /// 6917 // induction of apoptosis // inferred from electronic annotation /// 19538 // protein metabolism // inferred from electronic annotation	---	IPR003891 // Initiation factor eIF-4 gamma, MA3 // 1.5E-42 /// IPR003891 // Initiation factor eIF-4 gamma, MA3 // 1.4E-47
5631	146830_s_at	-0.634635	0.716127	-7.00505	6.74308e-08	1.72077e-06	8.08276	FBgn0033327 /// FBgn0043576	CG14746 /// CG8577	PGRP-SC1b /// PGRP-SC1a	PGRP-SC1b /// PGRP-SC1a	35859 /// 35861	4872 // receptor activity // inferred from electronic annotation /// 8745 // N-acetylmuramoyl-L-alanine amidase activity // inferred from electronic annotation /// 42834 // peptidoglycan binding // inferred from sequence or structural similarity /// 42834 // peptidoglycan binding // non-traceable author statement /// 5515 // protein binding // inferred from electronic annotation /// 8745 // N-ace…	6952 // defense response // non-traceable author statement /// 6955 // immune response // inferred from sequence or structural similarity /// 9253 // peptidoglycan catabolism // inferred from electronic annotation /// 9253 // peptidoglycan catabolism // inferred from sequence or structural similarity /// 45087 // innate immune response // inferred from sequence or structural similarity /// 16045 …	5576 // extracellular region // inferred from sequence or structural similarity /// 5887 // integral to plasma membrane // non-traceable author statement /// 5576 // extracellular region // non-traceable author statement /// 5576 // extracellular region // inferred from sequence similarity	IPR002502 // N-acetylmuramoyl-L-alanine amidase, family 2 // 6.4E-63
1470	142669_at	-0.484776	1.43603	-7.00435	6.75631e-08	1.72102e-06	8.08082	FBgn0014868	CG9022	Ost48	Oligosaccharyltransferase 48kD subunit	31849	4579 // dolichyl-diphosphooligosaccharide-protein glycotransferase activity // inferred from sequence or structural similarity /// 4579 // dolichyl-diphosphooligosaccharide-protein glycotransferase activity // inferred from electronic annotation /// 16740 // transferase activity // inferred from electronic annotation /// 4579 // dolichyl-diphosphooligosaccharide-protein glycotransferase activity …	6487 // protein amino acid N-linked glycosylation // non-traceable author statement /// 18279 // protein amino acid N-linked glycosylation via asparagine // inferred from electronic annotation	5789 // endoplasmic reticulum membrane // inferred from electronic annotation /// 5783 // endoplasmic reticulum // inferred from electronic annotation /// 16020 // membrane // inferred from electronic annotation /// 16021 // integral to membrane // inferred from electronic annotation	IPR005013 // Dolichyl-diphosphooligosaccharide-protein glycosyltransferase 48kDa subunit // 1.0E-126
6158	147357_at	-0.47956	0.155795	-7.00001	6.83853e-08	1.73565e-06	8.06885	FBgn0050458	CG30458	CG30458	CG30458	246624	45735 // nutrient reservoir activity // inferred from electronic annotation	---	---	IPR004011 // GYR motif // 1.3E-7
3672	144871_at	-0.514842	0.591678	-6.99614	6.91273e-08	1.75131e-06	8.05817	FBgn0001624	CG1725	dlg1	discs large 1	32083	4385 // guanylate kinase activity // traceable author statement /// 5154 // epidermal growth factor receptor binding // traceable author statement /// 5198 // structural molecule activity // traceable author statement /// 5200 // structural constituent of cytoskeleton // inferred from electronic annotation /// 5515 // protein binding // inferred from sequence or structural similarity /// 5515 // …	74 // regulation of progression through cell cycle // non-traceable author statement /// 1738 // morphogenesis of a polarized epithelium // traceable author statement /// 2009 // morphogenesis of an epithelium // traceable author statement /// 6605 // protein targeting // inferred from electronic annotation /// 7010 // cytoskeleton organization and biogenesis // non-traceable author statement ///…	5737 // cytoplasm // non-traceable author statement /// 5856 // cytoskeleton // non-traceable author statement /// 5886 // plasma membrane // non-traceable author statement /// 5918 // septate junction // non-traceable author statement /// 5918 // septate junction // traceable author statement /// 5938 // cell cortex // inferred from direct assay /// 16020 // membrane // traceable author statemen…	IPR001478 // PDZ/DHR/GLGF domain // 3.6E-27 /// IPR001478 // PDZ/DHR/GLGF domain // 6.4E-20 /// IPR001478 // PDZ/DHR/GLGF domain // 2.0E-27 /// IPR001452 // SH3 // 1.2E-9 /// IPR008144 // Guanylate kinase // 3.8E-62 /// IPR001478 // PDZ/DHR/GLGF domain // 3.6E-27 /// IPR001478 // PDZ/DHR/GLGF domain // 6.4E-20 /// IPR001478 // PDZ/DHR/GLGF domain // 2.0E-27 /// IPR001452 // SH3 // 1.2E-9 /// IPR0…
8323	149522_at	-0.413824	-0.325618	-6.97658	7.30026e-08	1.82637e-06	8.0042	FBgn0037625	CG11768	CG11768	CG11768	41046	---	---	---	---
13971	AFFX-BioC-5_at	-0.991113	1.41032	-6.97287	7.3762e-08	1.8388e-06	7.99396	---	---	---	---	---	4015 // adenosylmethionine-8-amino-7-oxononanoate transaminase activity // inferred from electronic annotation /// 8483 // transaminase activity // inferred from electronic annotation /// 16740 // transferase activity // inferred from electronic annotation /// 30170 // pyridoxal phosphate binding // inferred from electronic annotation /// 3824 // catalytic activity // inferred from electronic ann…	9102 // biotin biosynthesis // inferred from electronic annotation /// 8152 // metabolism // inferred from electronic annotation /// 9058 // biosynthesis // inferred from electronic annotation /// 9236 // cobalamin biosynthesis // inferred from electronic annotation	---	---
4530	145729_at	-0.417942	0.747239	-6.96689	7.50028e-08	1.86641e-06	7.97745	FBgn0031559	CG3513	CG3513	CG3513	33590	4867 // serine-type endopeptidase inhibitor activity // inferred from sequence or structural similarity /// 4867 // serine-type endopeptidase inhibitor activity // inferred from electronic annotation /// 4867 // serine-type endopeptidase inhibitor activity // inferred from sequence similarity	---	---	IPR002223 // Pancreatic trypsin inhibitor (Kunitz) // 2.5E-19
4657	145856_at	-0.434575	0.541558	-6.96327	7.57631e-08	1.88199e-06	7.96747	FBgn0031753	CG13999	CG13999	CG13999	33826	---	---	---	---
11426	152625_at	-0.555438	1.66083	-6.95849	7.67814e-08	1.90391e-06	7.95426	FBgn0031522	CG3285	CG3285	CG3285	33547	3677 // DNA binding // inferred from electronic annotation /// 5215 // transporter activity // inferred from electronic annotation /// 8170 // N-methyltransferase activity // inferred from electronic annotation /// 15144 // carbohydrate transporter activity // inferred from electronic annotation /// 5351 // sugar porter activity // inferred from electronic annotation	5975 // carbohydrate metabolism // inferred from electronic annotation /// 6306 // DNA methylation // inferred from electronic annotation /// 6810 // transport // inferred from electronic annotation /// 8643 // carbohydrate transport // inferred from electronic annotation	16020 // membrane // inferred from electronic annotation /// 16021 // integral to membrane // inferred from electronic annotation	IPR005828 // General substrate transporter // 1.2E-33
10952	152151_at	-0.691581	3.41332	-6.95507	7.75182e-08	1.91878e-06	7.94481	FBgn0036824	CG3902	CG3902	CG3902	40059	16937 // short-branched-chain-acyl-CoA dehydrogenase activity // inferred from sequence or structural similarity /// 3995 // acyl-CoA dehydrogenase activity // inferred from electronic annotation /// 16491 // oxidoreductase activity // inferred from electronic annotation /// 16937 // short-branched-chain-acyl-CoA dehydrogenase activity // inferred from sequence similarity	6118 // electron transport // inferred from electronic annotation /// 6637 // acyl-CoA metabolism // inferred from electronic annotation	---	IPR006090 // Acyl-CoA dehydrogenase, C-terminal // 6.7E-70 /// IPR006091 // Acyl-CoA dehydrogenase, central domain // 2.1E-57 /// IPR006092 // Acyl-CoA dehydrogenase, N-terminal // 7.6E-34
5230	146429_at	-0.935016	2.15953	-6.95247	7.80841e-08	1.92598e-06	7.93762	FBgn0032669	CG15155	CG15155	CG15155	35087	---	---	---	IPR000182 // GCN5-related N-acetyltransferase // 1.1E-5
4044	145243_at	-0.600026	1.64767	-6.95153	7.8289e-08	1.92764e-06	7.93502	FBgn0030837	CG8661	CG8661	CG8661	32720	---	---	---	---
5216	146415_at	-0.660738	1.86292	-6.94092	8.06416e-08	1.97226e-06	7.90573	FBgn0032654	CG15147	CG15147	CG15147	35069	---	---	---	---
6273	147472_at	-0.542298	3.57893	-6.9402	8.0805e-08	1.97226e-06	7.90373	FBgn0034405	CG15102	Jheh2	Juvenile hormone epoxide hydrolase 2	37181	4301 // epoxide hydrolase activity // inferred from sequence or structural similarity /// 8096 // juvenile hormone epoxide hydrolase activity // non-traceable author statement /// 5515 // protein binding // inferred from physical interaction /// 3824 // catalytic activity // inferred from electronic annotation /// 4301 // epoxide hydrolase activity // inferred from electronic annotation /// 16787…	6719 // juvenile hormone catabolism // non-traceable author statement /// 6952 // defense response // inferred from electronic annotation /// 9636 // response to toxin // inferred from electronic annotation /// 19439 // aromatic compound catabolism // inferred from electronic annotation	5792 // microsome // inferred from sequence or structural similarity /// 5783 // endoplasmic reticulum // inferred from electronic annotation /// 5792 // microsome // inferred from electronic annotation /// 16020 // membrane // inferred from electronic annotation /// 16021 // integral to membrane // inferred from electronic annotation /// 5792 // microsome // inferred from sequence similarity	IPR000073 // Alpha/beta hydrolase fold // 9.3E-13 /// IPR010497 // Epoxide hydrolase, N-terminal // 1.7E-69 /// IPR010497 // Epoxide hydrolase, N-terminal // 2.2E-37
3600	144799_at	-0.503506	0.450428	-6.93636	8.16757e-08	1.98659e-06	7.89312	FBgn0052683	CG32683	CG32683	CG32683	31970	---	6886 // intracellular protein transport // inferred from electronic annotation /// 6897 // endocytosis // inferred from electronic annotation /// 7165 // signal transduction // inferred from electronic annotation /// 7166 // cell surface receptor linked signal transduction // inferred from electronic annotation /// 7186 // G-protein coupled receptor protein signaling pathway // inferred from elec…	---	IPR000698 // Arrestin // 1.2E-42
3800	144999_at	-0.340731	0.414456	-6.93184	8.27153e-08	2.00491e-06	7.88061	FBgn0030470	CG12724	CG12724	CG12724	32284	---	---	---	---
2648	143847_at	-0.572919	0.00629816	-6.92531	8.42388e-08	2.03002e-06	7.86255	FBgn0015803	CG10043	rtGEF	rho-type guanine exchange factor	35306	5085 // guanyl-nucleotide exchange factor activity // inferred from sequence or structural similarity /// 5085 // guanyl-nucleotide exchange factor activity // inferred from sequence similarity	50807 // regulation of synapse structure // inferred from mutant phenotype	---	IPR001452 // SH3 // 5.4E-20 /// IPR000219 // DH domain // 1.8E-6
3061	144260_at	-0.563359	2.19617	-6.92396	8.45566e-08	2.03197e-06	7.85882	FBgn0028848	CG7311	CG7311	CG7311	34776	4368 // glycerol-3-phosphate dehydrogenase activity // inferred from sequence or structural similarity /// 16491 // oxidoreductase activity // inferred from electronic annotation /// 4368 // glycerol-3-phosphate dehydrogenase activity // inferred from electronic annotation /// 4368 // glycerol-3-phosphate dehydrogenase activity // inferred from sequence similarity	6072 // glycerol-3-phosphate metabolism // inferred from electronic annotation /// 6118 // electron transport // inferred from electronic annotation /// 6629 // lipid metabolism // inferred from electronic annotation	5739 // mitochondrion // inferred from sequence or structural similarity /// 9331 // glycerol-3-phosphate dehydrogenase complex // inferred from electronic annotation /// 5739 // mitochondrion // inferred from sequence similarity	IPR006076 // FAD dependent oxidoreductase // 1.9E-37 /// IPR006076 // FAD dependent oxidoreductase // 5.2E-11
2626	143825_at	-0.96223	3.90379	-6.92126	8.51969e-08	2.04385e-06	7.85136	FBgn0015584 /// FBgn0064259	CG8622	Acp53Ea /// DyakAcp53Ea	Accessory gland-specific peptide 53Ea /// Acp53Ea	36874	5179 // hormone activity // non-traceable author statement /// 5515 // protein binding // inferred from physical interaction	7321 // sperm displacement // non-traceable author statement /// 7582 // physiological process // non-traceable author statement /// 45297 // post-mating behavior // non-traceable author statement /// 46692 // sperm competition // traceable author statement /// 7610 // behavior // inferred from electronic annotation	5576 // extracellular region // non-traceable author statement	IPR009392 // Drosophila ACP53EA // 6.0E-106
11486	152685_at	-0.425831	0.63837	-6.91368	8.70218e-08	2.0805e-06	7.83039	FBgn0040345	CG3708	CG3708	CG3708	31039	42393 // histone binding // inferred from sequence or structural similarity /// 5515 // protein binding // inferred from physical interaction /// 42393 // histone binding // inferred from sequence similarity	6334 // nucleosome assembly // inferred from sequence or structural similarity /// 6461 // protein complex assembly // inferred from electronic annotation /// 6334 // nucleosome assembly // inferred from electronic annotation /// 6334 // nucleosome assembly // inferred from sequence similarity	5634 // nucleus // inferred from electronic annotation	IPR002164 // Nucleosome assembly protein (NAP) // 2.7E-68
1702	142901_at	-0.466555	0.331901	-6.91137	8.75862e-08	2.09043e-06	7.82399	FBgn0037884	CG17184	CG17184	CG17184	41353	5083 // small GTPase regulator activity // inferred from electronic annotation	6928 // cell motility // inferred from electronic annotation /// 7010 // cytoskeleton organization and biogenesis // inferred from electronic annotation	---	IPR010504 // Arfaptin-like // 1.5E-126
8611	149810_at	-0.48719	0.0762285	-6.90421	8.93561e-08	2.12905e-06	7.8042	FBgn0051342	CG31342	CG31342	CG31342	41592	---	---	---	---
6096	147295_at	-0.711227	1.15342	-6.898	9.0922e-08	2.15536e-06	7.78701	FBgn0034103	CG15704	CG15704	CG15704	36814	---	---	---	---
10224	151423_at	-0.476386	-0.103441	-6.89806	9.09081e-08	2.15536e-06	7.78716	FBgn0040961	CG15867	CG15867	CG15867	50435	---	---	---	---
3825	145024_at	-0.451489	0.817076	-6.87626	9.66269e-08	2.28161e-06	7.7268	FBgn0030509	CG11162	CG11162	CG11162	32325	254 // C-4 methylsterol oxidase activity // inferred from sequence or structural similarity /// 254 // C-4 methylsterol oxidase activity // inferred from sequence similarity	8203 // cholesterol metabolism // inferred from electronic annotation	---	IPR006088 // Sterol desaturase // 1.1E-46
5463	146662_at	-0.594718	0.234015	-6.87585	9.67363e-08	2.28161e-06	7.72568	FBgn0033049	CG14471	CG14471	CG14471	35525	---	---	---	---
190	141389_at	-0.549711	1.24866	-6.87511	9.69379e-08	2.28252e-06	7.72362	FBgn0034582	CG10531	CG10531	CG10531	37392	4568 // chitinase activity // inferred from sequence or structural similarity /// 8083 // growth factor activity // inferred from electronic annotation /// 16799 // hydrolase activity, hydrolyzing N-glycosyl compounds // inferred from electronic annotation /// 4553 // hydrolase activity, hydrolyzing O-glycosyl compounds // inferred from electronic annotation /// 4568 // chitinase activity // infe…	5976 // polysaccharide metabolism // inferred from electronic annotation /// 7165 // signal transduction // inferred from electronic annotation /// 7267 // cell-cell signaling // inferred from electronic annotation /// 5975 // carbohydrate metabolism // inferred from electronic annotation /// 6032 // chitin catabolism // inferred from electronic annotation	---	IPR001223 // Glycoside hydrolase, family 18 // 1.3E-114
9030	150229_at	-0.405687	0.775194	-6.87189	9.78155e-08	2.29547e-06	7.71471	FBgn0038750	CG4465	CG4465	CG4465	42374	8513 // organic cation porter activity // inferred from sequence or structural similarity /// 8513 // organic cation porter activity // inferred from sequence similarity	---	---	---
7636	148835_at	-0.638395	0.889854	-6.86448	9.98648e-08	2.33574e-06	7.69419	FBgn0036549	CG10516	CG10516	CG10516	39738	---	---	---	IPR003877 // SPla/RYanodine receptor SPRY // 3.2E-32
2130	143329_at	-0.393812	0.41166	-6.86228	1.00483e-07	2.34236e-06	7.68809	FBgn0003301	CG9533	rut	rutabaga	32406	4016 // adenylate cyclase activity // non-traceable author statement /// 4016 // adenylate cyclase activity // traceable author statement /// 4383 // guanylate cyclase activity // inferred from electronic annotation /// 8294 // calcium- and calmodulin-responsive adenylate cyclase activity // non-traceable author statement /// 8294 // calcium- and calmodulin-responsive adenylate cyclase activity /…	6171 // cAMP biosynthesis // non-traceable author statement /// 6171 // cAMP biosynthesis // traceable author statement /// 7186 // G-protein coupled receptor protein signaling pathway // traceable author statement /// 7268 // synaptic transmission // inferred from mutant phenotype /// 7591 // molting cycle (sensu Insecta) // inferred from genetic interaction /// 7611 // learning and/or memory //…	5887 // integral to plasma membrane // non-traceable author statement /// 16020 // membrane // inferred from electronic annotation /// 16021 // integral to membrane // inferred from electronic annotation	IPR001054 // Guanylate cyclase // 4.1E-82 /// IPR001054 // Guanylate cyclase // 2.1E-74 /// IPR009398 // Protein of unknown function DUF1053 // 2.1E-43
2332	143531_at	-0.395358	-0.141583	-6.85401	1.02839e-07	2.38814e-06	7.66516	FBgn0004897	CG11921	fd96Ca	forkhead domain 96Ca	43010	3700 // transcription factor activity // inferred from sequence or structural similarity /// 3700 // transcription factor activity // inferred from sequence similarity	6357 // regulation of transcription from RNA polymerase II promoter // inferred from electronic annotation /// 9790 // embryonic development // non-traceable author statement	5634 // nucleus // inferred from sequence or structural similarity /// 5634 // nucleus // non-traceable author statement /// 5634 // nucleus // inferred from sequence similarity	IPR001766 // Fork head transcription factor // 6.1E-71
8698	149897_at	-0.474643	0.227971	-6.84014	1.06913e-07	2.47578e-06	7.62673	FBgn0051330	CG31330	CG31330	CG31330	41754	---	---	---	---
1742	142941_at	-0.373394	0.312714	-6.83758	1.07686e-07	2.48956e-06	7.6196	FBgn0000567	CG32180	Eip74EF	Ecdysone-induced protein 74EF	39962	3700 // transcription factor activity // traceable author statement /// 3704 // specific RNA polymerase II transcription factor activity // inferred from sequence or structural similarity /// 3677 // DNA binding // inferred from electronic annotation /// 3700 // transcription factor activity // inferred from electronic annotation /// 43565 // sequence-specific DNA binding // inferred from electro…	6355 // regulation of transcription, DNA-dependent // inferred from sequence or structural similarity /// 6357 // regulation of transcription from RNA polymerase II promoter // inferred from electronic annotation /// 6914 // autophagy // inferred from mutant phenotype /// 7498 // mesoderm development // inferred from electronic annotation /// 8219 // cell death // traceable author statement /// 9…	5634 // nucleus // inferred from sequence or structural similarity /// 5634 // nucleus // non-traceable author statement /// 5634 // nucleus // inferred from electronic annotation /// 5634 // nucleus // inferred from sequence similarity	IPR000418 // Ets-domain // 1.7E-56 /// IPR000418 // Ets-domain // 1.7E-56
63	141262_at	-0.384748	0.917013	-6.83537	1.08352e-07	2.49301e-06	7.6135	FBgn0038965	CG13852	mats	mob as tumor suppressor	42634	19207 // kinase regulator activity // inferred from electronic annotation /// 5515 // protein binding // inferred from physical interaction	910 // cytokinesis // inferred from electronic annotation /// 7049 // cell cycle // inferred from electronic annotation /// 7067 // mitosis // inferred from electronic annotation	---	IPR005301 // Mob1/phocein family // 8.6E-123
1895	143094_at	-0.792831	0.589301	-6.83578	1.08228e-07	2.49301e-06	7.61464	FBgn0000273	CG4379	Pka-C1	cAMP-dependent protein kinase 1	34284	4674 // protein serine/threonine kinase activity // non-traceable author statement /// 4691 // cAMP-dependent protein kinase activity // inferred from sequence or structural similarity /// 4691 // cAMP-dependent protein kinase activity // non-traceable author statement /// 4702 // receptor signaling protein serine/threonine kinase activity // inferred from electronic annotation /// 5515 // protei…	6468 // protein amino acid phosphorylation // inferred from sequence or structural similarity /// 6468 // protein amino acid phosphorylation // non-traceable author statement /// 7228 // activation of hh target transcription factor // inferred from mutant phenotype /// 7314 // oocyte anterior/posterior axis determination // inferred from mutant phenotype /// 7317 // regulation of pole plasm oskar…	5886 // plasma membrane // inferred from direct assay /// 5952 // cAMP-dependent protein kinase complex // inferred from sequence or structural similarity /// 5952 // cAMP-dependent protein kinase complex // inferred from sequence similarity	IPR000719 // Protein kinase // 2.5E-87 /// IPR000961 // Protein kinase C-terminal domain // 4.1E-8
9718	150917_at	-0.394031	0.27779	-6.83448	1.08624e-07	2.49479e-06	7.61102	FBgn0039810	CG15549	CG15549	CG15549	43665	---	---	---	---
4753	145952_at	-0.585283	2.12743	-6.8291	1.10275e-07	2.52856e-06	7.5961	FBgn0031905	CG5155	CG5155	CG5155	34014	5488 // binding // inferred from electronic annotation	---	---	IPR000225 // Armadillo // 5.7E-7
3702	144901_at	-0.444552	0.804094	-6.82779	1.10682e-07	2.53375e-06	7.59245	FBgn0030343	CG1886	ATP7	ATP7	32142	4008 // copper-exporting ATPase activity // inferred from sequence or structural similarity /// 5507 // copper ion binding // inferred from electronic annotation /// 5524 // ATP binding // inferred from electronic annotation /// 46872 // metal ion binding // inferred from electronic annotation /// 166 // nucleotide binding // inferred from electronic annotation /// 3824 // catalytic activity // i…	6812 // cation transport // inferred from electronic annotation /// 6825 // copper ion transport // inferred from mutant phenotype /// 8152 // metabolism // inferred from electronic annotation /// 6825 // copper ion transport // inferred from electronic annotation /// 30001 // metal ion transport // inferred from electronic annotation	16020 // membrane // inferred from electronic annotation /// 16021 // integral to membrane // inferred from electronic annotation	IPR006121 // Heavy metal transport/detoxification protein // 3.1E-7 /// IPR006121 // Heavy metal transport/detoxification protein // 4.6E-14 /// IPR006121 // Heavy metal transport/detoxification protein // 2.4E-6 /// IPR006121 // Heavy metal transport/detoxification protein // 1.8E-15 /// IPR008250 // E1-E2 ATPase-associated region // 1.8E-87 /// IPR005834 // Haloacid dehalogenase-like hydrolase …
11461	152660_at	-0.486415	0.884435	-6.82337	1.1206e-07	2.56112e-06	7.58021	FBgn0030777	CG9672	CG9672	CG9672	32651	4252 // serine-type endopeptidase activity // non-traceable author statement /// 4263 // chymotrypsin activity // inferred from electronic annotation /// 4295 // trypsin activity // inferred from electronic annotation /// 4252 // serine-type endopeptidase activity // inferred from electronic annotation	6508 // proteolysis // inferred from electronic annotation	---	IPR001254 // Peptidase S1, chymotrypsin // 6.6E-31
932	142131_at	-0.440306	1.39308	-6.81473	1.14811e-07	2.61928e-06	7.55621	FBgn0034715	CG3382	Oatp58Db	Organic anion transporting polypeptide 58Db	37544	8514 // organic anion transporter activity // inferred from sequence or structural similarity /// 8514 // organic anion transporter activity // inferred from sequence similarity	6364 // rRNA processing // inferred from electronic annotation /// 6820 // anion transport // inferred from electronic annotation /// 15711 // organic anion transport // inferred from sequence or structural similarity /// 15711 // organic anion transport // inferred from sequence similarity	16020 // membrane // inferred from electronic annotation	IPR004157 // Organic anion transporter polypeptide (OATP), C-terminal // 1.0E-126
8049	149248_at	-0.458028	-0.0106954	-6.81044	1.162e-07	2.63851e-06	7.54432	FBgn0037181	CG11370	CG11370	CG11370	40486	---	---	---	---
6736	147935_at	-0.438734	0.469462	-6.80872	1.16763e-07	2.64701e-06	7.53954	FBgn0035155	CG12015	RabX6	RabX6	38084	3924 // GTPase activity // inferred from sequence or structural similarity /// 5525 // GTP binding // inferred from sequence or structural similarity /// 166 // nucleotide binding // inferred from electronic annotation /// 5525 // GTP binding // inferred from electronic annotation /// 3924 // GTPase activity // inferred from sequence similarity /// 5525 // GTP binding // inferred from sequence si…	6886 // intracellular protein transport // inferred from electronic annotation /// 7264 // small GTPase mediated signal transduction // inferred from electronic annotation /// 16192 // vesicle-mediated transport // inferred from electronic annotation	16020 // membrane // inferred from electronic annotation	IPR001806 // Ras GTPase superfamily // 5.4E-35
4663	145862_at	-0.405152	-0.00663305	-6.80742	1.17191e-07	2.65242e-06	7.53592	FBgn0031760	CG9093	Tsp26A	Tetraspanin 26A	33838	5102 // receptor binding // inferred from electronic annotation	7165 // signal transduction // inferred from electronic annotation /// 16337 // cell-cell adhesion // inferred from electronic annotation	16021 // integral to membrane // inferred from sequence or structural similarity /// 16021 // integral to membrane // inferred from electronic annotation /// 16021 // integral to membrane // inferred from sequence similarity	IPR000301 // CD9/CD37/CD63 antigen // 4.8E-79
6686	147885_at	-0.437406	0.0817931	-6.80283	1.18708e-07	2.68241e-06	7.5232	FBgn0053988	---	CG33988	CG33988	37953	---	---	---	---
9233	150432_at	-0.616175	0.372099	-6.80068	1.19427e-07	2.69381e-06	7.51722	FBgn0000338	CG17894	cnc	cap-n-collar	42743	3677 // DNA binding // inferred from mutant phenotype /// 3700 // transcription factor activity // traceable author statement /// 3702 // RNA polymerase II transcription factor activity // non-traceable author statement /// 16563 // transcriptional activator activity // traceable author statement /// 46982 // protein heterodimerization activity // inferred from sequence or structural similarity /…	6357 // regulation of transcription from RNA polymerase II promoter // inferred from electronic annotation /// 6950 // response to stress // inferred from electronic annotation /// 6952 // defense response // inferred from electronic annotation /// 7310 // oocyte dorsal/ventral axis determination // inferred from mutant phenotype /// 7317 // regulation of pole plasm oskar mRNA localization // inf…	5634 // nucleus // inferred from direct assay /// 5634 // nucleus // non-traceable author statement /// 5740 // mitochondrial envelope // inferred from direct assay /// 5739 // mitochondrion // inferred from electronic annotation /// 5741 // mitochondrial outer membrane // inferred from electronic annotation /// 16020 // membrane // inferred from electronic annotation /// 16021 // integral to mem…	---
3658	144857_at	-0.611672	-0.0586964	-6.79645	1.20854e-07	2.71623e-06	7.50547	FBgn0030281	CG11105	CG11105	CG11105	32063	5509 // calcium ion binding // inferred from sequence or structural similarity /// 5516 // calmodulin binding // inferred from electronic annotation /// 5509 // calcium ion binding // inferred from sequence similarity	7268 // synaptic transmission // inferred from electronic annotation /// 19722 // calcium-mediated signaling // inferred from electronic annotation	---	IPR002048 // Calcium-binding EF-hand // 4.5E-7 /// IPR002048 // Calcium-binding EF-hand // 8.8E-8 /// IPR002048 // Calcium-binding EF-hand // 4.5E-7 /// IPR002048 // Calcium-binding EF-hand // 8.8E-8
5654	146853_at	-0.435858	0.192641	-6.77601	1.27995e-07	2.86915e-06	7.44868	FBgn0033360	CG11824	CG11824	CG11824	35903	4252 // serine-type endopeptidase activity // inferred from sequence or structural similarity /// 4263 // chymotrypsin activity // inferred from electronic annotation /// 4295 // trypsin activity // non-traceable author statement /// 4252 // serine-type endopeptidase activity // inferred from sequence similarity	6508 // proteolysis // non-traceable author statement /// 6952 // defense response // inferred from electronic annotation	---	IPR001254 // Peptidase S1, chymotrypsin // 9.6E-78
6696	147895_at	-0.568539	0.425052	-6.7708	1.2988e-07	2.89906e-06	7.43422	FBgn0035071	CG15859	CG15859	CG15859	37975	---	---	---	---
4211	145410_at	-0.73422	1.00417	-6.7685	1.30722e-07	2.91163e-06	7.42783	FBgn0031085	CG9570	CG9570	CG9570	33009	---	---	---	---
9351	150550_at	-0.408345	1.43872	-6.76612	1.31599e-07	2.92652e-06	7.42121	FBgn0039269	CG7662	veli	veli	43003	5515 // protein binding // inferred from electronic annotation /// 5515 // protein binding // inferred from physical interaction	7155 // cell adhesion // inferred from electronic annotation /// 7163 // establishment and/or maintenance of cell polarity // non-traceable author statement /// 19226 // transmission of nerve impulse // inferred from electronic annotation	35003 // subapical complex // inferred from direct assay /// 45211 // postsynaptic membrane // inferred from direct assay	IPR001478 // PDZ/DHR/GLGF domain // 2.4E-23 /// IPR004172 // L27 domain // 2.7E-19 /// IPR001478 // PDZ/DHR/GLGF domain // 1.1E-17
1195	142394_at	-0.487842	1.01131	-6.76365	1.32515e-07	2.92986e-06	7.41435	FBgn0037238	CG1090	CG1090	CG1090	40551	8273 // calcium, potassium:sodium antiporter activity // inferred from sequence or structural similarity /// 15268 // alpha-type channel activity // inferred from electronic annotation /// 8273 // calcium, potassium:sodium antiporter activity // inferred from sequence similarity	6812 // cation transport // inferred from electronic annotation	16021 // integral to membrane // inferred from electronic annotation	IPR004837 // Sodium/calcium exchanger membrane region // 3.9E-19 /// IPR004837 // Sodium/calcium exchanger membrane region // 4.4E-35 /// IPR004837 // Sodium/calcium exchanger membrane region // 4.8E-32 /// IPR004837 // Sodium/calcium exchanger membrane region // 4.4E-35 /// IPR004837 // Sodium/calcium exchanger membrane region // 2.9E-26
4071	145270_at	-0.40512	-0.302284	-6.7629	1.32795e-07	2.92986e-06	7.41226	FBgn0030884	CG6847	CG6847	CG6847	32778	4806 // triacylglycerol lipase activity // inferred from sequence or structural similarity /// 3824 // catalytic activity // inferred from electronic annotation /// 4806 // triacylglycerol lipase activity // inferred from sequence similarity	6629 // lipid metabolism // inferred from electronic annotation	---	IPR000734 // Lipase // 2.9E-70
8541	149740_at	-0.496278	0.225104	-6.7634	1.32612e-07	2.92986e-06	7.41363	FBgn0038001	CG17404	CG17404	CG17404	41482	4252 // serine-type endopeptidase activity // inferred from sequence or structural similarity /// 4252 // serine-type endopeptidase activity // non-traceable author statement /// 4263 // chymotrypsin activity // inferred from electronic annotation /// 4295 // trypsin activity // inferred from electronic annotation /// 4252 // serine-type endopeptidase activity // inferred from sequence similarity	6508 // proteolysis // non-traceable author statement	---	IPR001254 // Peptidase S1, chymotrypsin // 1.2E-62
7662	148861_at	-0.52646	1.74277	-6.7576	1.34789e-07	2.96451e-06	7.39752	FBgn0036588	CG13068	CG13068	CG13068	39784	---	---	---	---
2814	144013_at	-0.541443	0.61453	-6.7392	1.41945e-07	3.10241e-06	7.34636	FBgn0024242	CG31175	Dys	dystrophin	42327	3779 // actin binding // inferred from sequence or structural similarity /// 5198 // structural molecule activity // inferred from sequence or structural similarity /// 5200 // structural constituent of cytoskeleton // inferred from electronic annotation /// 5200 // structural constituent of cytoskeleton // inferred from sequence or structural similarity /// 8092 // cytoskeletal protein binding /…	7010 // cytoskeleton organization and biogenesis // inferred from electronic annotation /// 7263 // nitric oxide mediated signal transduction // inferred from electronic annotation /// 7268 // synaptic transmission // inferred from electronic annotation /// 7517 // muscle development // inferred from sequence or structural similarity /// 7517 // muscle development // inferred from sequence simila…	5856 // cytoskeleton // inferred from sequence or structural similarity /// 16010 // dystrophin-associated glycoprotein complex // inferred from sequence or structural similarity /// 16010 // dystrophin-associated glycoprotein complex // non-traceable author statement /// 5856 // cytoskeleton // inferred from electronic annotation /// 5856 // cytoskeleton // inferred from sequence similarity /// …	IPR001202 // WW/Rsp5/WWP domain // 6.6E-11 /// IPR001715 // Calponin-like actin-binding // 3.3E-26 /// IPR001715 // Calponin-like actin-binding // 4.8E-22 /// IPR000433 // Zn-finger, ZZ type // 4.5E-21 /// IPR002017 // Spectrin repeat // 0.12 /// IPR002017 // Spectrin repeat // 9.7E-4 /// IPR002017 // Spectrin repeat // 1.3E-5 /// IPR002017 // Spectrin repeat // 5.7E-14 /// IPR002017 // Spectrin …
4391	145590_at	-0.41315	0.521143	-6.73166	1.44988e-07	3.15906e-06	7.32538	FBgn0051935	CG31935	CG31935	CG31935	33338	5097 // Rab GTPase activator activity // inferred from sequence or structural similarity /// 17137 // Rab GTPase binding // inferred from sequence or structural similarity /// 5097 // Rab GTPase activator activity // inferred from sequence similarity /// 17137 // Rab GTPase binding // inferred from sequence similarity	43087 // regulation of GTPase activity // inferred from sequence or structural similarity /// 43087 // regulation of GTPase activity // inferred from sequence similarity	5625 // soluble fraction // inferred from sequence or structural similarity /// 5625 // soluble fraction // inferred from sequence similarity	---
11698	152897_at	-0.636265	1.9979	-6.72802	1.46482e-07	3.18172e-06	7.31523	FBgn0036422	CG3868	CG3868	CG3868	39580	---	---	---	---
3012	144211_at	-0.796899	6.81061	-6.72586	1.47375e-07	3.19616e-06	7.30922	FBgn0028415	CG18064	Met75Cb	Met75Cb	44481	---	---	---	---
8957	150156_at	-0.472761	0.162393	-6.72249	1.48779e-07	3.20856e-06	7.29984	FBgn0038642	CG7709	CG7709	CG7709	42246	---	---	---	IPR004019 // YLP motif // 3.8 /// IPR004019 // YLP motif // 13.0 /// IPR004019 // YLP motif // 13.0
6699	147898_at	-0.387379	0.0400074	-6.71898	1.50254e-07	3.23358e-06	7.29008	FBgn0035079	CG18506	CG18506	CG18506	37984	5515 // protein binding // inferred from physical interaction	---	---	---
6125	147324_at	-0.441645	0.561961	-6.71728	1.50977e-07	3.23433e-06	7.28533	FBgn0050463	CG30463	CG30463	CG30463	246627	4653 // polypeptide N-acetylgalactosaminyltransferase activity // inferred from sequence or structural similarity /// 4653 // polypeptide N-acetylgalactosaminyltransferase activity // inferred from electronic annotation /// 5509 // calcium ion binding // inferred from electronic annotation /// 5529 // sugar binding // inferred from electronic annotation /// 16740 // transferase activity // inferr…	5976 // polysaccharide metabolism // inferred from electronic annotation /// 6486 // protein amino acid glycosylation // inferred from electronic annotation	5795 // Golgi stack // inferred from electronic annotation /// 16020 // membrane // inferred from electronic annotation /// 16021 // integral to membrane // inferred from electronic annotation	IPR000772 // Ricin B lectin domain // 1.3E-9 /// IPR000772 // Ricin B lectin domain // 1.4E-8 /// IPR001173 // Glycosyl transferase, family 2 // 4.2E-34
6889	148088_at	-0.42086	0.528613	-6.71727	1.50982e-07	3.23433e-06	7.28531	FBgn0035413	CG14958	CG14958	CG14958	38387	---	---	---	---
7286	148485_at	-0.614783	0.95891	-6.71328	1.52685e-07	3.26584e-06	7.27421	FBgn0036032	CG16711	CG16711	CG16711	39135	---	---	---	---
5473	146672_at	-0.472795	0.843682	-6.71049	1.53887e-07	3.28653e-06	7.26645	FBgn0000546	CG1765	EcR	Ecdysone receptor	35540	3677 // DNA binding // non-traceable author statement /// 3700 // transcription factor activity // inferred from electronic annotation /// 3701 // RNA polymerase I transcription factor activity // non-traceable author statement /// 4879 // ligand-dependent nuclear receptor activity // non-traceable author statement /// 4879 // ligand-dependent nuclear receptor activity // traceable author stateme…	6357 // regulation of transcription from RNA polymerase II promoter // inferred from electronic annotation /// 6357 // regulation of transcription from RNA polymerase II promoter // inferred from mutant phenotype /// 6914 // autophagy // inferred from mutant phenotype /// 7155 // cell adhesion // inferred from mutant phenotype /// 7242 // intracellular signaling cascade // inferred from electroni…	5634 // nucleus // inferred from direct assay /// 5634 // nucleus // non-traceable author statement /// 5700 // polytene chromosome // non-traceable author statement /// 5737 // cytoplasm // inferred from direct assay /// 8230 // ecdysone receptor holocomplex // traceable author statement /// 5634 // nucleus // inferred from electronic annotation	IPR000536 // Ligand-binding domain of nuclear hormone receptor // 9.3E-52 /// IPR001628 // Zn-finger, C4-type steroid receptor // 1.0E-50
12069	153268_at	-0.4427	0.0353948	-6.70905	1.54514e-07	3.29489e-06	7.26243	FBgn0028434	CG10215	Ercc1	Ercc1	36654	14 // single-stranded DNA specific endodeoxyribonuclease activity // inferred from sequence or structural similarity /// 3676 // nucleic acid binding // inferred from electronic annotation /// 3677 // DNA binding // inferred from electronic annotation /// 3684 // damaged DNA binding // inferred from electronic annotation /// 5515 // protein binding // inferred from physical interaction /// 4519 /…	6289 // nucleotide-excision repair // non-traceable author statement /// 6281 // DNA repair // inferred from electronic annotation	5634 // nucleus // inferred from electronic annotation /// 5622 // intracellular // inferred from electronic annotation	IPR004579 // DNA repair protein rad10 // 1.2E-46
5115	146314_at	-0.501992	1.53271	-6.70759	1.55149e-07	3.3034e-06	7.25838	FBgn0032478	CG5458	CG5458	CG5458	34712	---	---	---	IPR003409 // MORN motif // 1.8E-8 /// IPR003409 // MORN motif // 4.3E-7 /// IPR003409 // MORN motif // 2.2E-8 /// IPR003409 // MORN motif // 9.0E-6
2205	143404_at	-0.363369	0.381762	-6.70321	1.57076e-07	3.32924e-06	7.24617	FBgn0003979	CG9048	Vm26Aa	Vitelline membrane 26Aa	33829	8316 // structural constituent of vitelline membrane (sensu Insecta) // non-traceable author statement	7305 // vitelline membrane formation (sensu Insecta) // non-traceable author statement /// 9993 // oogenesis (sensu Insecta) // inferred from mutant phenotype	---	---
4619	145818_s_at	-0.612339	5.33351	-6.70172	1.57734e-07	3.33815e-06	7.24203	FBgn0015031	CG14028	cype	cyclope	46040	4129 // cytochrome-c oxidase activity // inferred from sequence or structural similarity /// 4129 // cytochrome-c oxidase activity // inferred from sequence similarity	6123 // mitochondrial electron transport, cytochrome c to oxygen // inferred from sequence or structural similarity /// 6123 // mitochondrial electron transport, cytochrome c to oxygen // inferred from sequence similarity	5751 // respiratory chain complex IV (sensu Eukaryota) // inferred from sequence or structural similarity /// 5751 // respiratory chain complex IV (sensu Eukaryota) // inferred from sequence similarity	IPR004204 // Cytochrome c oxidase subunit VIc // 2.2E-49
4436	145635_at	-0.43469	0.00373163	-6.69339	1.61479e-07	3.4071e-06	7.21883	FBgn0031414	CG33955	eys	eyes shut	3771890	4872 // receptor activity // inferred from electronic annotation /// 5102 // receptor binding // inferred from electronic annotation /// 5198 // structural molecule activity // inferred from electronic annotation /// 5509 // calcium ion binding // inferred from electronic annotation /// 5515 // protein binding // inferred from electronic annotation	7155 // cell adhesion // inferred from electronic annotation /// 7166 // cell surface receptor linked signal transduction // inferred from electronic annotation /// 7398 // ectoderm development // inferred from electronic annotation /// 7399 // nervous system development // inferred from electronic annotation /// 8283 // cell proliferation // inferred from electronic annotation /// 16337 // cell-…	5886 // plasma membrane // inferred from sequence or structural similarity /// 16020 // membrane // inferred from electronic annotation /// 16021 // integral to membrane // inferred from electronic annotation /// 5886 // plasma membrane // inferred from sequence similarity	---
1087	142286_at	-0.556111	-0.152864	-6.6867	1.64553e-07	3.46675e-06	7.20017	FBgn0035914	CG6282	CG6282	CG6282	38985	---	---	16021 // integral to membrane // inferred from electronic annotation	IPR010721 // Protein of unknown function DUF1295 // 1.0E-126
3001	144200_at	-0.56867	1.33087	-6.68407	1.65777e-07	3.46776e-06	7.19284	FBgn0028375	CG5876	heix	heixuedian	34961	16740 // transferase activity // inferred from electronic annotation /// 5515 // protein binding // inferred from physical interaction /// 4659 // prenyltransferase activity // inferred from electronic annotation	6629 // lipid metabolism // inferred from electronic annotation /// 6732 // coenzyme metabolism // inferred from electronic annotation /// 9110 // vitamin biosynthesis // inferred from electronic annotation /// 9234 // menaquinone biosynthesis // inferred from electronic annotation /// 51189 // prosthetic group metabolism // inferred from electronic annotation	16021 // integral to membrane // inferred from sequence or structural similarity /// 16021 // integral to membrane // inferred from electronic annotation /// 16021 // integral to membrane // inferred from sequence similarity	IPR000537 // UbiA prenyltransferase // 1.6E-18
3923	145122_at	-0.444671	1.66948	-6.68189	1.66795e-07	3.46776e-06	7.18679	FBgn0030643	CG15641	CG15641	CG15641	32477	---	---	---	---
10183	151382_at	-0.442025	0.0688262	-6.67979	1.67788e-07	3.47481e-06	7.18092	FBgn0040913	CG15785	CG15785	CG15785	2768874	---	---	---	---
11126	152325_at	-1.14157	2.1595	-6.67782	1.68721e-07	3.48126e-06	7.17543	FBgn0039114	CG10374	Lsd-1	Lipid storage droplet-1	42810	5515 // protein binding // inferred from physical interaction /// 5319 // lipid transporter activity // inferred from expression pattern	19915 // sequestering of lipid // non-traceable author statement /// 6869 // lipid transport // inferred from expression pattern /// 19915 // sequestering of lipid // inferred from expression pattern /// 6810 // transport // inferred from electronic annotation /// 6869 // lipid transport // inferred from electronic annotation	5811 // lipid particle // inferred from direct assay	IPR004279 // Perilipin // 1.0E-126 /// IPR004279 // Perilipin // 1.3E-16 /// IPR004279 // Perilipin // 1.0E-126 /// IPR004279 // Perilipin // 1.3E-16 /// IPR004279 // Perilipin // 3.9E-109 /// IPR004279 // Perilipin // 1.3E-16
7224	148423_at	-0.649943	-0.325654	-6.67581	1.69681e-07	3.49593e-06	7.16982	FBgn0035928	CG13310	CG13310	CG13310	39007	---	---	---	---
2722	143921_at	-0.366919	0.337876	-6.66744	1.73731e-07	3.55844e-06	7.14649	FBgn0020371	CG15257	Tim17b2	Translocase inner membrane 17	44381	15450 // protein translocase activity // inferred from sequence or structural similarity /// 8565 // protein transporter activity // inferred from electronic annotation /// 15450 // protein translocase activity // inferred from sequence similarity	6626 // protein targeting to mitochondrion // inferred from sequence or structural similarity /// 15031 // protein transport // inferred from sequence or structural similarity /// 15031 // protein transport // inferred from electronic annotation /// 6626 // protein targeting to mitochondrion // inferred from sequence similarity /// 15031 // protein transport // inferred from sequence similarity	5744 // mitochondrial inner membrane presequence translocase complex // inferred from sequence or structural similarity /// 5743 // mitochondrial inner membrane // inferred from electronic annotation /// 5744 // mitochondrial inner membrane presequence translocase complex // inferred from sequence similarity	IPR003397 // Mitochondrial import inner membrane translocase, subunit Tim17/22 // 1.1E-55
5875	147074_at	-0.406792	0.23889	-6.65387	1.80507e-07	3.66507e-06	7.10865	FBgn0033707	CG13165	CG13165	CG13165	36330	---	50875 // cellular physiological process // inferred from mutant phenotype	---	---
577	141776_at	-0.547128	2.8652	-6.65057	1.82191e-07	3.67795e-06	7.09947	FBgn0039543	CG12428	CG12428	CG12428	43332	8458 // carnitine O-octanoyltransferase activity // inferred from sequence or structural similarity /// 16407 // acetyltransferase activity // inferred from electronic annotation /// 5515 // protein binding // inferred from physical interaction /// 8415 // acyltransferase activity // inferred from electronic annotation /// 16740 // transferase activity // inferred from electronic annotation /// 8…	6520 // amino acid metabolism // inferred from electronic annotation	5777 // peroxisome // inferred from sequence or structural similarity /// 5777 // peroxisome // inferred from sequence similarity	IPR000542 // Acyltransferase ChoActase/COT/CPT // 2.4E-118
1083	142282_at	-0.408599	0.669238	-6.65176	1.81582e-07	3.67795e-06	7.10278	FBgn0032797	CG10186	CG10186	CG10186	35238	5215 // transporter activity // inferred from electronic annotation /// 5507 // copper ion binding // inferred from electronic annotation	6118 // electron transport // inferred from electronic annotation /// 6810 // transport // inferred from electronic annotation /// 6952 // defense response // inferred from electronic annotation	16020 // membrane // inferred from sequence or structural similarity /// 16020 // membrane // inferred from sequence similarity	IPR000436 // Sushi domain/SCR domain/CCP module // 1.5E-5 /// IPR000436 // Sushi domain/SCR domain/CCP module // 1.9E-9 /// IPR000436 // Sushi domain/SCR domain/CCP module // 6.1E-11 /// IPR000436 // Sushi domain/SCR domain/CCP module // 2.0E-14 /// IPR000436 // Sushi domain/SCR domain/CCP module // 8.8E-8 /// IPR000436 // Sushi domain/SCR domain/CCP module // 2.9E-8 /// IPR000436 // Sushi domain…
6848	148047_at	-0.742703	0.874558	-6.64876	1.83126e-07	3.69151e-06	7.0944	FBgn0052306	CG32306	CG32306	CG32306	38306	---	---	---	---
5407	146606_at	-0.52538	0.0532071	-6.64408	1.85561e-07	3.73522e-06	7.08134	FBgn0028979	CG12630	tio	tiptop	44272	3677 // DNA binding // non-traceable author statement /// 3700 // transcription factor activity // inferred from sequence or structural similarity /// 8270 // zinc ion binding // non-traceable author statement /// 3676 // nucleic acid binding // inferred from electronic annotation /// 3677 // DNA binding // inferred from electronic annotation /// 8270 // zinc ion binding // inferred from electron…	6355 // regulation of transcription, DNA-dependent // non-traceable author statement /// 45449 // regulation of transcription // inferred from sequence or structural similarity /// 6350 // transcription // inferred from electronic annotation /// 6355 // regulation of transcription, DNA-dependent // inferred from electronic annotation /// 7275 // development // inferred from electronic annotation …	5634 // nucleus // inferred from sequence or structural similarity /// 5634 // nucleus // non-traceable author statement /// 5634 // nucleus // inferred from electronic annotation /// 5634 // nucleus // inferred from sequence similarity	IPR007087 // Zn-finger, C2H2 type // 4.0E-5
4085	145284_at	-0.492475	0.834704	-6.64005	1.87684e-07	3.76712e-06	7.07009	FBgn0053639	CG33639	CG33639	CG33639	32803	8188 // neuropeptide receptor activity // inferred from sequence or structural similarity /// 16526 // G-protein coupled receptor activity, unknown ligand // inferred from sequence or structural similarity /// 8188 // neuropeptide receptor activity // inferred from sequence similarity /// 16526 // G-protein coupled receptor activity, unknown ligand // inferred from sequence similarity	7186 // G-protein coupled receptor protein signaling pathway // inferred from sequence or structural similarity /// 7186 // G-protein coupled receptor protein signaling pathway // inferred from sequence similarity	16021 // integral to membrane // inferred from sequence or structural similarity /// 16021 // integral to membrane // inferred from sequence similarity	---
2958	144157_s_at	-0.478863	0.610138	-6.63088	1.92599e-07	3.84375e-06	7.04453	FBgn0026758	CG18009	Trf2	TATA box binding protein-related factor 2	31773	3677 // DNA binding // inferred from electronic annotation /// 3704 // specific RNA polymerase II transcription factor activity // inferred from direct assay /// 3704 // specific RNA polymerase II transcription factor activity // traceable author statement /// 16251 // general RNA polymerase II transcription factor activity // inferred from sequence or structural similarity /// 3702 // RNA polyme…	6357 // regulation of transcription from RNA polymerase II promoter // inferred from direct assay /// 6357 // regulation of transcription from RNA polymerase II promoter // inferred from mutant phenotype /// 6367 // transcription initiation from RNA polymerase II promoter // inferred from sequence or structural similarity /// 6367 // transcription initiation from RNA polymerase II promoter // tra…	5667 // transcription factor complex // inferred from direct assay /// 5669 // transcription factor TFIID complex // inferred from sequence or structural similarity /// 5634 // nucleus // inferred from electronic annotation /// 5669 // transcription factor TFIID complex // inferred from electronic annotation /// 5669 // transcription factor TFIID complex // inferred from sequence similarity	IPR000814 // Transcription factor TFIID // 2.6E-34 /// IPR000814 // Transcription factor TFIID // 5.7E-34
4120	145319_at	-0.41129	0.302434	-6.60561	2.06845e-07	4.09886e-06	6.97396	FBgn0004959	CG6578	phm	phantom	32857	4497 // monooxygenase activity // inferred from electronic annotation /// 16491 // oxidoreductase activity // inferred from electronic annotation /// 35302 // ecdysteroid 25-hydroxylase activity // inferred from direct assay /// 5506 // iron ion binding // inferred from electronic annotation /// 20037 // heme binding // inferred from electronic annotation /// 46872 // metal ion binding // inferre…	1700 // embryonic development (sensu Insecta) // inferred from mutant phenotype /// 6118 // electron transport // inferred from electronic annotation /// 6697 // ecdysone biosynthesis // inferred from direct assay /// 8202 // steroid metabolism // inferred from electronic annotation /// 9993 // oogenesis (sensu Insecta) // inferred from mutant phenotype /// 17143 // insecticide metabolism // non-…	5783 // endoplasmic reticulum // inferred from direct assay /// 5792 // microsome // non-traceable author statement /// 16020 // membrane // non-traceable author statement /// 5783 // endoplasmic reticulum // inferred from electronic annotation /// 5792 // microsome // inferred from electronic annotation /// 16020 // membrane // inferred from electronic annotation	IPR001128 // Cytochrome P450 // 8.6E-16 /// IPR001128 // Cytochrome P450 // 7.3E-63
11170	152369_at	-1.03715	3.60346	-6.58943	2.16516e-07	4.23657e-06	6.92877	FBgn0032049	CG13095	CG13095	CG13095	34182	4190 // aspartic-type endopeptidase activity // inferred from sequence or structural similarity /// 4194 // pepsin A activity // inferred from electronic annotation /// 4190 // aspartic-type endopeptidase activity // inferred from electronic annotation /// 8233 // peptidase activity // inferred from electronic annotation /// 16787 // hydrolase activity // inferred from electronic annotation /// 4…	6508 // proteolysis // inferred from electronic annotation	---	IPR001461 // Peptidase A1, pepsin // 1.0E-126
13812	155011_at	-0.450532	0.0774547	-6.5868	2.18135e-07	4.2623e-06	6.9214	FBgn0052564	CG32564	CG32564	CG32564	326222	---	---	---	---
12212	153411_at	-0.354984	0.449916	-6.58297	2.20506e-07	4.30263e-06	6.91071	FBgn0027903	CG12018	CG12018	CG12018	38228	3676 // nucleic acid binding // inferred from electronic annotation /// 3891 // delta DNA polymerase activity // inferred from sequence or structural similarity /// 3891 // delta DNA polymerase activity // non-traceable author statement /// 3677 // DNA binding // inferred from electronic annotation /// 3887 // DNA-directed DNA polymerase activity // inferred from electronic annotation /// 16740 /…	6260 // DNA replication // non-traceable author statement /// 6281 // DNA repair // inferred from electronic annotation /// 6260 // DNA replication // inferred from electronic annotation	5634 // nucleus // inferred from electronic annotation	---
9006	150205_at	-0.917362	1.77169	-6.5815	2.21426e-07	4.30859e-06	6.9066	FBgn0038717	CG17751	CG17751	CG17751	42336	8513 // organic cation porter activity // inferred from sequence or structural similarity /// 15144 // carbohydrate transporter activity // inferred from electronic annotation /// 5215 // transporter activity // inferred from electronic annotation /// 8513 // organic cation porter activity // inferred from sequence similarity	6812 // cation transport // inferred from electronic annotation /// 6858 // extracellular transport // inferred from electronic annotation /// 6810 // transport // inferred from electronic annotation	16021 // integral to membrane // inferred from electronic annotation /// 16020 // membrane // inferred from electronic annotation	IPR005828 // General substrate transporter // 3.2E-11
6131	147330_at	-0.734719	0.310588	-6.57538	2.25287e-07	4.36646e-06	6.8895	FBgn0034155	CG8566	unc-104	unc-104	36876	3777 // microtubule motor activity // inferred from electronic annotation /// 3777 // microtubule motor activity // inferred from sequence or structural similarity /// 5200 // structural constituent of cytoskeleton // inferred from electronic annotation /// 5524 // ATP binding // inferred from electronic annotation /// 3777 // microtubule motor activity // inferred from sequence similarity	6605 // protein targeting // inferred from electronic annotation /// 6886 // intracellular protein transport // inferred from electronic annotation /// 7010 // cytoskeleton organization and biogenesis // inferred from electronic annotation /// 7018 // microtubule-based movement // inferred from electronic annotation	5871 // kinesin complex // inferred from sequence or structural similarity /// 5875 // microtubule associated complex // inferred from electronic annotation /// 5871 // kinesin complex // inferred from sequence similarity	IPR000253 // Forkhead-associated (FHA) // 1.5E-14 /// IPR001849 // Pleckstrin-like // 1.2E-18 /// IPR001752 // Kinesin, motor region // 1.0E-126
5373	146572_at	-0.568993	-0.0579885	-6.57034	2.28526e-07	4.41606e-06	6.87539	FBgn0040297	CG9256	Nhe2	Nhe2	35376	15299 // solute:hydrogen antiporter activity // inferred from electronic annotation /// 15385 // sodium:hydrogen antiporter activity // non-traceable author statement /// 15297 // antiporter activity // inferred from electronic annotation /// 15385 // sodium:hydrogen antiporter activity // inferred from electronic annotation	6812 // cation transport // inferred from electronic annotation /// 6814 // sodium ion transport // inferred from electronic annotation /// 6885 // regulation of pH // non-traceable author statement /// 6810 // transport // inferred from electronic annotation /// 6811 // ion transport // inferred from electronic annotation /// 6885 // regulation of pH // inferred from electronic annotation	16021 // integral to membrane // inferred from electronic annotation	IPR006153 // Sodium/hydrogen exchanger // 1.0E-126
412	141611_at	-0.462187	1.79748	-6.56679	2.30825e-07	4.44173e-06	6.86549	FBgn0037373	CG2095	CG2095	CG2095	40712	5515 // protein binding // inferred from physical interaction	6886 // intracellular protein transport // inferred from electronic annotation /// 6887 // exocytosis // inferred from electronic annotation /// 6904 // vesicle docking during exocytosis // inferred from electronic annotation /// 15031 // protein transport // inferred from electronic annotation /// 6810 // transport // inferred from electronic annotation	145 // exocyst // inferred from electronic annotation	IPR004172 // L27 domain // 9.5E-15 /// IPR007191 // Sec8 exocyst complex component specific domain // 1.4E-81
4033	145232_at	-0.303071	-0.0449939	-6.56634	2.31122e-07	4.44173e-06	6.86422	FBgn0030824	CG5070	CG5070	CG5070	32705	---	---	---	---
3424	144623_at	-0.379133	-0.231159	-6.56278	2.3346e-07	4.47438e-06	6.85427	FBgn0029912	CG4557	CG4557	CG4557	31629	3700 // transcription factor activity // inferred from sequence or structural similarity /// 3700 // transcription factor activity // inferred from sequence similarity	---	---	---
6695	147894_at	-0.451585	-0.00630913	-6.55636	2.37736e-07	4.53771e-06	6.83632	FBgn0035070	CG3650	CG3650	CG3650	37974	4263 // chymotrypsin activity // inferred from electronic annotation /// 4295 // trypsin activity // inferred from sequence or structural similarity /// 4295 // trypsin activity // non-traceable author statement /// 4295 // trypsin activity // inferred from sequence similarity	6508 // proteolysis // non-traceable author statement	---	IPR001254 // Peptidase S1, chymotrypsin // 1.9E-47
12136	153335_at	-0.469381	2.13492	-6.55143	2.41076e-07	4.58896e-06	6.82252	FBgn0015562	CG6657	veg	vegetable	44057	---	7422 // peripheral nervous system development // traceable author statement	16021 // integral to membrane // inferred from sequence or structural similarity /// 16021 // integral to membrane // inferred from sequence similarity	IPR007315 // Protein of unknown function DUF409 // 1.0E-126
3739	144938_at	-0.483531	0.595233	-6.54347	2.4657e-07	4.67449e-06	6.80024	FBgn0030391	CG1900	Rab40	Rab40	32195	3924 // GTPase activity // inferred from sequence or structural similarity /// 5525 // GTP binding // inferred from electronic annotation /// 166 // nucleotide binding // inferred from electronic annotation /// 3924 // GTPase activity // inferred from sequence similarity	6886 // intracellular protein transport // inferred from electronic annotation /// 6897 // endocytosis // inferred from electronic annotation /// 7242 // intracellular signaling cascade // inferred from electronic annotation /// 7264 // small GTPase mediated signal transduction // inferred from electronic annotation /// 8360 // regulation of cell shape // inferred from mutant phenotype /// 17157 …	16020 // membrane // inferred from electronic annotation	IPR001806 // Ras GTPase superfamily // 2.7E-39 /// IPR001806 // Ras GTPase superfamily // 2.7E-39
4648	145847_at	-0.381265	0.970439	-6.54084	2.48412e-07	4.70121e-06	6.79288	FBgn0031741	CG11034	CG11034	CG11034	33810	4274 // dipeptidyl-peptidase IV activity // inferred from sequence or structural similarity /// 4274 // dipeptidyl-peptidase IV activity // inferred from sequence similarity	6508 // proteolysis // inferred from electronic annotation /// 7166 // cell surface receptor linked signal transduction // inferred from electronic annotation	16020 // membrane // inferred from electronic annotation	IPR001375 // Peptidase S9, prolyl oligopeptidase active site region // 2.5E-17 /// IPR002469 // Peptidase S9B, dipeptidylpeptidase IV N-terminal // 2.6E-60 /// IPR002469 // Peptidase S9B, dipeptidylpeptidase IV N-terminal // 1.2E-16
4965	146164_at	-0.452685	-0.084004	-6.53954	2.49327e-07	4.70765e-06	6.78925	FBgn0051719	CG31719	RluA-1	RluA-1	34438	3729 // mRNA binding // inferred from electronic annotation /// 4730 // pseudouridylate synthase activity // inferred from electronic annotation /// 8835 // diaminohydroxyphosphoribosylaminopyrimidine deaminase activity // inferred from sequence or structural similarity /// 9982 // pseudouridine synthase activity // inferred from electronic annotation /// 16829 // lyase activity // inferred from …	6396 // RNA processing // inferred from electronic annotation /// 9231 // riboflavin biosynthesis // inferred from sequence or structural similarity /// 16072 // rRNA metabolism // inferred from electronic annotation /// 9231 // riboflavin biosynthesis // inferred from sequence similarity	---	IPR006145 // Pseudouridine synthase // 2.4E-51
6688	147887_at	-0.509446	0.0224818	-6.52958	2.56453e-07	4.80335e-06	6.76139	FBgn0050421 /// FBgn0064435	CG30421	CG30421 /// DpseGA15834	CG30421 /// GA15834	37954	4197 // cysteine-type endopeptidase activity // inferred from electronic annotation /// 4221 // ubiquitin thiolesterase activity // inferred from electronic annotation /// 4843 // ubiquitin-specific protease activity // inferred from sequence or structural similarity /// 4843 // ubiquitin-specific protease activity // inferred from sequence similarity	6508 // proteolysis // inferred from electronic annotation /// 6511 // ubiquitin-dependent protein catabolism // inferred from electronic annotation /// 16579 // protein deubiquitination // inferred from sequence or structural similarity /// 16579 // protein deubiquitination // inferred from sequence similarity	---	IPR001394 // Peptidase C19, ubiquitin carboxyl-terminal hydrolase family 2 // 1.5E-110
7324	148523_at	-0.458724	0.639631	-6.53	2.56153e-07	4.80335e-06	6.76255	FBgn0052062	CG32062	CG32062	CG32062	39198	3729 // mRNA binding // inferred from sequence or structural similarity /// 166 // nucleotide binding // inferred from electronic annotation /// 3676 // nucleic acid binding // inferred from electronic annotation /// 3729 // mRNA binding // inferred from sequence similarity	---	---	IPR000504 // RNA-binding region RNP-1 (RNA recognition motif) // 4.8E-20 /// IPR000504 // RNA-binding region RNP-1 (RNA recognition motif) // 4.8E-20
4568	145767_at	-0.763225	0.626815	-6.52385	2.60652e-07	4.86897e-06	6.74533	---	---	---	---	---	---	---	---	---
6304	147503_at	-0.432203	0.0472625	-6.49813	2.80344e-07	5.19526e-06	6.67332	FBgn0034456	CG15121	CG15121	CG15121	37250	---	---	---	---
8480	149679_at	-0.508412	1.7341	-6.49521	2.82672e-07	5.22459e-06	6.66515	FBgn0037883	CG14701	CG14701	CG14701	41352	8270 // zinc ion binding // inferred from electronic annotation /// 46872 // metal ion binding // inferred from electronic annotation	---	---	IPR007872 // CSL zinc finger // 2.9E-33
2840	144039_at	-0.418383	0.485284	-6.49337	2.8415e-07	5.24498e-06	6.65999	FBgn0024977	CG2709	CG2709	CG2709	31264	4842 // ubiquitin-protein ligase activity // inferred from electronic annotation /// 8270 // zinc ion binding // inferred from electronic annotation	16567 // protein ubiquitination // inferred from electronic annotation	151 // ubiquitin ligase complex // inferred from electronic annotation	---
10620	151819_at	-0.452984	2.05454	-6.4922	2.85095e-07	5.2555e-06	6.65671	FBgn0038878	CG3301	CG3301	CG3301	42528	16616 // oxidoreductase activity, acting on the CH-OH group of donors, NAD or NADP as acceptor // inferred from sequence or structural similarity /// 42802 // identical protein binding // inferred from physical interaction /// 16491 // oxidoreductase activity // inferred from electronic annotation /// 16616 // oxidoreductase activity, acting on the CH-OH group of donors, NAD or NADP as acceptor /…	8152 // metabolism // inferred from electronic annotation	---	IPR002198 // Short-chain dehydrogenase/reductase SDR // 3.2E-36
3927	145126_at	-0.484127	0.252373	-6.4897	2.87123e-07	5.28594e-06	6.6497	FBgn0027287	CG33206	l(1)G0168	lethal (1) G0168	32483	3676 // nucleic acid binding // inferred from electronic annotation /// 5200 // structural constituent of cytoskeleton // inferred from electronic annotation	6139 // nucleobase, nucleoside, nucleotide and nucleic acid metabolism // inferred from electronic annotation /// 7010 // cytoskeleton organization and biogenesis // inferred from electronic annotation	---	---
11989	153188_at	-0.386403	3.11214	-6.48604	2.90115e-07	5.33401e-06	6.63945	FBgn0026567	CG2358	CG2358	CG2358	40815	8236 // serine-type peptidase activity // inferred from electronic annotation /// 9003 // signal peptidase activity // inferred from sequence or structural similarity /// 8233 // peptidase activity // inferred from electronic annotation /// 9003 // signal peptidase activity // inferred from sequence similarity	6465 // signal peptide processing // inferred from sequence or structural similarity /// 6508 // proteolysis // inferred from electronic annotation /// 6465 // signal peptide processing // inferred from electronic annotation /// 6465 // signal peptide processing // inferred from sequence similarity	5787 // signal peptidase complex // inferred from sequence or structural similarity /// 16020 // membrane // inferred from electronic annotation /// 5787 // signal peptidase complex // inferred from sequence similarity	IPR000508 // Peptidase S26, signal peptidase I // 4.1E-51
5060	146259_at	-0.333817	-0.253125	-6.48397	2.91824e-07	5.35527e-06	6.63365	FBgn0032384	CG14944	CG14944	CG14944	34600	3824 // catalytic activity // inferred from electronic annotation /// 4114 // 3',5'-cyclic-nucleotide phosphodiesterase activity // inferred from electronic annotation	7165 // signal transduction // inferred from electronic annotation	---	---
4196	145395_at	-1.11974	1.79445	-6.48312	2.92526e-07	5.35724e-06	6.63127	FBgn0031069	CG12703	CG12703	CG12703	32992	166 // nucleotide binding // inferred from electronic annotation /// 5215 // transporter activity // inferred from sequence or structural similarity /// 5524 // ATP binding // inferred from electronic annotation /// 42626 // ATPase activity, coupled to transmembrane movement of substances // inferred from sequence or structural similarity /// 5515 // protein binding // inferred from physical inte…	6629 // lipid metabolism // inferred from electronic annotation /// 6869 // lipid transport // inferred from electronic annotation /// 7031 // peroxisome organization and biogenesis // inferred from sequence or structural similarity /// 6810 // transport // inferred from electronic annotation /// 7031 // peroxisome organization and biogenesis // inferred from sequence similarity	5779 // integral to peroxisomal membrane // inferred from sequence or structural similarity /// 16021 // integral to membrane // inferred from electronic annotation /// 43190 // ATP-binding cassette (ABC) transporter complex // inferred from sequence or structural similarity /// 5777 // peroxisome // inferred from electronic annotation /// 16020 // membrane // inferred from electronic annotation …	IPR010509 // ABC transporter, N-terminal // 6.9E-44 /// IPR003439 // ABC transporter // 1.9E-30
1410	142609_at	-0.339012	-0.0443729	-6.4763	2.98241e-07	5.4335e-06	6.61214	FBgn0003254	CG7230	rib	ribbon	44855	3677 // DNA binding // non-traceable author statement /// 3700 // transcription factor activity // traceable author statement /// 5515 // protein binding // inferred from electronic annotation /// 5515 // protein binding // inferred from physical interaction /// 3677 // DNA binding // inferred from electronic annotation /// 3700 // transcription factor activity // inferred from electronic annotat…	6355 // regulation of transcription, DNA-dependent // inferred from electronic annotation /// 7010 // cytoskeleton organization and biogenesis // traceable author statement /// 7391 // dorsal closure // inferred from mutant phenotype /// 7391 // dorsal closure // non-traceable author statement /// 7391 // dorsal closure // traceable author statement /// 7417 // central nervous system development …	5634 // nucleus // inferred from direct assay /// 5634 // nucleus // non-traceable author statement /// 5634 // nucleus // traceable author statement /// 5634 // nucleus // inferred from electronic annotation	IPR000210 // BTB/POZ domain // 7.4E-21 /// IPR007889 // Helix-turn-helix, Psq // 5.8E-18
6092	147291_at	-0.646136	0.731025	-6.47673	2.97874e-07	5.4335e-06	6.61336	FBgn0034099	CG15708	CG15708	CG15708	36805	---	---	---	---
12824	154023_at	-0.457861	2.81778	-6.47575	2.98707e-07	5.43491e-06	6.6106	FBgn0015283	CG7619	Pros54	Proteasome 54kD subunit	40388	4175 // endopeptidase activity // inferred from direct assay /// 4175 // endopeptidase activity // non-traceable author statement /// 5515 // protein binding // inferred from physical interaction	6508 // proteolysis // inferred from direct assay /// 6508 // proteolysis // inferred from sequence or structural similarity /// 6511 // ubiquitin-dependent protein catabolism // non-traceable author statement /// 7059 // chromosome segregation // inferred from mutant phenotype /// 19538 // protein metabolism // inferred from electronic annotation /// 6508 // proteolysis // inferred from sequence…	502 // proteasome complex (sensu Eukaryota) // non-traceable author statement /// 5838 // proteasome regulatory particle (sensu Eukaryota) // inferred from direct assay /// 5838 // proteasome regulatory particle (sensu Eukaryota) // inferred from sequence or structural similarity /// 8540 // proteasome regulatory particle, base subcomplex (sensu Eukaryota) // inferred from sequence or structural …	IPR003903 // Ubiquitin interacting motif // 3.9E-5 /// IPR003903 // Ubiquitin interacting motif // 4.6E-5 /// IPR003903 // Ubiquitin interacting motif // 1.8E-5
11145	152344_at	-0.538014	1.51328	-6.47007	3.03552e-07	5.50876e-06	6.59469	FBgn0027795	CG14785	CG14785	CG14785	31094	---	---	---	---
3210	144409_at	-0.418868	0.296662	-6.46273	3.09933e-07	5.60279e-06	6.57413	FBgn0040375	CG13760	CG13760	CG13760	31237	---	---	---	---
4564	145763_at	-0.509507	0.482018	-6.45993	3.12411e-07	5.63304e-06	6.56626	FBgn0031609	CG15443	CG15443	CG15443	33656	5515 // protein binding // inferred from physical interaction /// 5488 // binding // inferred from electronic annotation	---	---	---
4678	145877_at	-0.502209	0.332313	-6.4564	3.15549e-07	5.68231e-06	6.55638	FBgn0051640	CG31640	CG31640	CG31640	33870	4716 // receptor signaling protein tyrosine kinase activity // inferred from sequence or structural similarity /// 4716 // receptor signaling protein tyrosine kinase activity // inferred from sequence similarity	7155 // cell adhesion // inferred from electronic annotation /// 7165 // signal transduction // inferred from sequence or structural similarity /// 7165 // signal transduction // inferred from sequence similarity	---	IPR000421 // Coagulation factor 5/8 type C domain (FA58C) // 3.1E-30
5158	146357_at	-0.726846	1.91714	-6.45424	3.17496e-07	5.71004e-06	6.5503	FBgn0032554	CG15278	CG15278	CG15278	34865	---	---	---	---
982	142181_at	-0.431768	0.182763	-6.44925	3.22021e-07	5.77658e-06	6.53631	FBgn0050079	CG30079	CG30079	CG30079	246440	---	---	---	---
9698	150897_at	-0.413407	1.3795	-6.44609	3.24916e-07	5.80622e-06	6.52746	FBgn0039783	CG9720	PH4NE2	prolyl-4-hydroxylase-alpha NE2	43628	4656 // procollagen-proline 4-dioxygenase activity // inferred from sequence or structural similarity /// 5488 // binding // inferred from electronic annotation /// 5506 // iron ion binding // inferred from electronic annotation /// 16491 // oxidoreductase activity // inferred from electronic annotation /// 16702 // oxidoreductase activity, acting on single donors with incorporation of molecular …	18401 // peptidyl-proline hydroxylation to 4-hydroxy-L-proline // inferred from sequence or structural similarity /// 19538 // protein metabolism // inferred from electronic annotation /// 18401 // peptidyl-proline hydroxylation to 4-hydroxy-L-proline // inferred from sequence similarity	16222 // procollagen-proline, 2-oxoglutarate-4-dioxygenase complex // Unknown /// 5783 // endoplasmic reticulum // inferred from electronic annotation /// 16222 // procollagen-proline, 2-oxoglutarate-4-dioxygenase complex // inferred from curator	IPR005123 // 2OG-Fe(II) oxygenase superfamily // 1.4E-7
4695	145894_at	-0.42615	-0.0768087	-6.4434	3.2741e-07	5.84333e-06	6.5199	FBgn0043854	CG9506	slam	slow as molasses	33890	---	8104 // protein localization // non-traceable author statement /// 8354 // germ cell migration // inferred from mutant phenotype /// 8354 // germ cell migration // traceable author statement /// 9796 // cellularization (sensu Metazoa) // inferred from mutant phenotype /// 9796 // cellularization (sensu Metazoa) // traceable author statement /// 16044 // membrane organization and biogenesis // non…	---	---
6808	148007_at	-0.39849	0.431824	-6.44227	3.28456e-07	5.84374e-06	6.51675	FBgn0035280	CG13935	CG13935	CG13935	38240	5214 // structural constituent of cuticle (sensu Insecta) // inferred from sequence or structural similarity /// 5515 // protein binding // inferred from physical interaction /// 42302 // structural constituent of cuticle // inferred from electronic annotation /// 5214 // structural constituent of cuticle (sensu Insecta) // inferred from sequence similarity	---	---	IPR000618 // Insect cuticle protein // 4.2E-31
8868	150067_at	-0.369816	0.413356	-6.44158	3.29101e-07	5.84374e-06	6.51481	FBgn0038500	CG14333	CG14333	CG14333	42088	---	---	---	---
3238	144437_at	-0.44123	1.49112	-6.43217	3.38013e-07	5.97171e-06	6.48839	FBgn0029657	CG12535	CG12535	CG12535	31311	---	---	---	---
9526	150725_at	-0.548156	-0.160582	-6.43083	3.39301e-07	5.98691e-06	6.48464	FBgn0039512	CG14264	CG14264	CG14264	43297	---	---	---	---
3495	144694_at	-0.325959	0.0961971	-6.42843	3.41618e-07	6.02022e-06	6.47791	FBgn0030027	CG1632	CG1632	CG1632	31763	4252 // serine-type endopeptidase activity // non-traceable author statement /// 4295 // trypsin activity // inferred from electronic annotation /// 5041 // low-density lipoprotein receptor activity // inferred from sequence or structural similarity /// 4252 // serine-type endopeptidase activity // inferred from electronic annotation /// 5041 // low-density lipoprotein receptor activity // inferr…	6508 // proteolysis // inferred from electronic annotation /// 7275 // development // inferred from electronic annotation	16020 // membrane // inferred from electronic annotation	IPR002172 // Low density lipoprotein-receptor, class A // 3.2E-5 /// IPR002172 // Low density lipoprotein-receptor, class A // 1.1E-10 /// IPR000082 // SEA domain // 5.7E-5 /// IPR000024 // Frizzled CRD region // 1.1E-19 /// IPR001254 // Peptidase S1, chymotrypsin // 1.1E-13
4238	145437_at	-0.397238	0.325495	-6.42487	3.45092e-07	6.07378e-06	6.46791	FBgn0031126	CG1829	Cyp6v1	Cyp6v1	33056	4497 // monooxygenase activity // inferred from electronic annotation /// 16491 // oxidoreductase activity // inferred from electronic annotation /// 5506 // iron ion binding // inferred from electronic annotation /// 20037 // heme binding // inferred from electronic annotation /// 46872 // metal ion binding // inferred from electronic annotation	6118 // electron transport // inferred from electronic annotation	5792 // microsome // non-traceable author statement /// 16020 // membrane // non-traceable author statement /// 5783 // endoplasmic reticulum // inferred from electronic annotation /// 5792 // microsome // inferred from electronic annotation	IPR001128 // Cytochrome P450 // 3.0E-36 /// IPR001128 // Cytochrome P450 // 3.4E-32
8762	149961_at	-0.382003	0.480818	-6.42203	3.47886e-07	6.10763e-06	6.45994	FBgn0038342	CG14870	CG14870	CG14870	41888	---	---	---	IPR010796 // B9 // 9.5E-67
1607	142806_at	-0.362486	0.187358	-6.41993	3.49963e-07	6.13639e-06	6.45405	FBgn0010097	CG17566	Tub37C	Tubulin at 37C	35199	3924 // GTPase activity // inferred from electronic annotation /// 5200 // structural constituent of cytoskeleton // inferred from sequence or structural similarity /// 5525 // GTP binding // inferred from direct assay /// 5525 // GTP binding // inferred from electronic annotation /// 15631 // tubulin binding // inferred from electronic annotation /// 166 // nucleotide binding // inferred from el…	6886 // intracellular protein transport // inferred from electronic annotation /// 6928 // cell motility // inferred from electronic annotation /// 7017 // microtubule-based process // inferred from sequence or structural similarity /// 7017 // microtubule-based process // non-traceable author statement /// 7018 // microtubule-based movement // inferred from electronic annotation /// 7059 // chro…	5815 // microtubule organizing center // inferred from sequence or structural similarity /// 5815 // microtubule organizing center // non-traceable author statement /// 5874 // microtubule // inferred from sequence or structural similarity /// 8275 // gamma-tubulin small complex // inferred from direct assay /// 45298 // tubulin // non-traceable author statement /// 775 // chromosome, pericentric…	IPR003008 // Tubulin/FtsZ, GTPase // 1.0E-99 /// IPR008280 // Tubulin/FtsZ, C-terminal // 3.6E-54
12736	153935_at	-0.378429	2.97501	-6.41657	3.53316e-07	6.17972e-06	6.44463	FBgn0034277	CG6370	CG6370	CG6370	37029	4579 // dolichyl-diphosphooligosaccharide-protein glycotransferase activity // inferred from sequence or structural similarity /// 4579 // dolichyl-diphosphooligosaccharide-protein glycotransferase activity // inferred from electronic annotation /// 4579 // dolichyl-diphosphooligosaccharide-protein glycotransferase activity // inferred from sequence similarity	6464 // protein modification // inferred from electronic annotation /// 18279 // protein amino acid N-linked glycosylation via asparagine // inferred from electronic annotation	5789 // endoplasmic reticulum membrane // inferred from electronic annotation /// 8250 // oligosaccharyl transferase complex // inferred from electronic annotation	IPR008814 // Ribophorin II // 1.0E-126
13970	AFFX-BioC-3_at	-0.799457	1.60191	-6.41326	3.56653e-07	6.22256e-06	6.43534	---	---	---	---	---	4015 // adenosylmethionine-8-amino-7-oxononanoate transaminase activity // inferred from electronic annotation /// 8483 // transaminase activity // inferred from electronic annotation /// 16740 // transferase activity // inferred from electronic annotation /// 30170 // pyridoxal phosphate binding // inferred from electronic annotation /// 3824 // catalytic activity // inferred from electronic ann…	9102 // biotin biosynthesis // inferred from electronic annotation /// 8152 // metabolism // inferred from electronic annotation /// 9058 // biosynthesis // inferred from electronic annotation /// 9236 // cobalamin biosynthesis // inferred from electronic annotation	---	---
9914	151113_at	-0.377993	-0.0143654	-6.41195	3.57985e-07	6.23028e-06	6.43165	FBgn0051005	CG31005	CG31005	CG31005	43697	10 // trans-hexaprenyltranstransferase activity // inferred from sequence or structural similarity /// 8415 // acyltransferase activity // inferred from electronic annotation /// 10 // trans-hexaprenyltranstransferase activity // inferred from sequence similarity	8299 // isoprenoid biosynthesis // inferred from electronic annotation	---	IPR000092 // Polyprenyl synthetase // 5.2E-44
503	141702_at	-0.652003	1.1032	-6.40709	3.62962e-07	6.30124e-06	6.418	FBgn0033247	CG8722	Nup44A	Nup44A	35762	17056 // structural constituent of nuclear pore // inferred from sequence or structural similarity /// 5515 // protein binding // inferred from physical interaction /// 17056 // structural constituent of nuclear pore // inferred from sequence similarity	6403 // RNA localization // inferred from electronic annotation /// 6886 // intracellular protein transport // inferred from electronic annotation /// 6887 // exocytosis // inferred from electronic annotation	5643 // nuclear pore // inferred from sequence or structural similarity /// 5643 // nuclear pore // inferred from sequence similarity	IPR001680 // G-protein beta WD-40 repeat // 1.0E-7 /// IPR001680 // G-protein beta WD-40 repeat // 2.2E-8 /// IPR001680 // G-protein beta WD-40 repeat // 5.7E-5 /// IPR001680 // G-protein beta WD-40 repeat // 0.95 /// IPR001680 // G-protein beta WD-40 repeat // 1.6E-6
128	141327_at	-0.53181	0.825292	-6.40635	3.63724e-07	6.30665e-06	6.41593	FBgn0038135	CG8773	CG8773	CG8773	41634	4179 // membrane alanyl aminopeptidase activity // inferred from electronic annotation /// 4230 // glutamyl aminopeptidase activity // inferred from sequence or structural similarity /// 8270 // zinc ion binding // inferred from electronic annotation /// 4230 // glutamyl aminopeptidase activity // inferred from sequence similarity	6508 // proteolysis // inferred from electronic annotation	---	IPR001930 // Peptidase M1, membrane alanine aminopeptidase // 1.0E-126
8434	149633_at	-0.59524	2.23606	-6.40562	3.64477e-07	6.31189e-06	6.41389	FBgn0037819	CG14688	CG14688	CG14688	41275	---	---	---	IPR008775 // Phytanoyl-CoA dioxygenase // 4.5E-90
7971	149170_at	-0.428543	0.729537	-6.40339	3.66794e-07	6.34418e-06	6.40762	FBgn0037067	CG11310	CG11310	CG11310	40352	42302 // structural constituent of cuticle // inferred from electronic annotation	---	---	IPR000618 // Insect cuticle protein // 1.5E-19
11090	152289_at	-0.418135	0.757498	-6.40008	3.70259e-07	6.39621e-06	6.39833	FBgn0030148	CG3106	CG3106	CG3106	31909	16747 // transferase activity, transferring groups other than amino-acyl groups // inferred from electronic annotation	---	---	IPR002656 // Acyltransferase 3 family // 5.1E-7
8025	149224_at	-0.517652	0.328892	-6.39775	3.72724e-07	6.43086e-06	6.39177	FBgn0037153	CG12673	olf413	olf413	40453	4500 // dopamine beta-monooxygenase activity // inferred from sequence or structural similarity /// 5507 // copper ion binding // inferred from electronic annotation /// 4497 // monooxygenase activity // inferred from electronic annotation /// 4500 // dopamine beta-monooxygenase activity // inferred from electronic annotation /// 4500 // dopamine beta-monooxygenase activity // inferred from seque…	6584 // catecholamine metabolism // inferred from electronic annotation /// 7268 // synaptic transmission // inferred from electronic annotation /// 6548 // histidine catabolism // inferred from electronic annotation	---	IPR005018 // DOMON domain // 3.0E-19 /// IPR000323 // Copper type II, ascorbate-dependent monooxygenase // 1.6E-6 /// IPR000323 // Copper type II, ascorbate-dependent monooxygenase // 1.8E-7
10071	151270_r_at	-0.813626	3.06254	-6.38849	3.82655e-07	6.57228e-06	6.36578	---	---	---	---	---	---	---	---	---
10665	151864_at	-0.4073	2.44684	-6.38836	3.82797e-07	6.57228e-06	6.36542	FBgn0041150	CG12787	hoe1	hoepel1	249663	5215 // transporter activity // inferred from sequence or structural similarity /// 5302 // L-tyrosine transporter activity // non-traceable author statement /// 8324 // cation transporter activity // inferred from electronic annotation /// 15105 // arsenite transporter activity // inferred from electronic annotation /// 15137 // citrate transporter activity // inferred from electronic annotation…	6810 // transport // inferred from sequence or structural similarity /// 6812 // cation transport // inferred from electronic annotation /// 6820 // anion transport // inferred from electronic annotation /// 15746 // citrate transport // inferred from electronic annotation /// 6810 // transport // inferred from sequence similarity	16020 // membrane // non-traceable author statement /// 16021 // integral to membrane // inferred from electronic annotation	---
4195	145394_at	-0.609112	1.62521	-6.38627	3.8508e-07	6.59532e-06	6.35954	FBgn0031068	CG12534	CG12534	CG12534	32991	16971 // flavin-linked sulfhydryl oxidase activity // inferred from sequence or structural similarity /// 16971 // flavin-linked sulfhydryl oxidase activity // inferred from sequence similarity	6118 // electron transport // inferred from electronic annotation /// 6119 // oxidative phosphorylation // inferred from electronic annotation	5739 // mitochondrion // inferred from sequence or structural similarity /// 5739 // mitochondrion // inferred from sequence similarity	IPR006863 // Erv1/Alr // 2.3E-61
2270	143469_at	-0.668568	1.60741	-6.3796	3.92455e-07	6.70524e-06	6.34079	FBgn0004430	CG1165	LysS	Lysozyme S	38130	3796 // lysozyme activity // inferred from sequence or structural similarity /// 3796 // lysozyme activity // non-traceable author statement /// 3796 // lysozyme activity // inferred from electronic annotation /// 3824 // catalytic activity // inferred from electronic annotation /// 16787 // hydrolase activity // inferred from electronic annotation /// 16798 // hydrolase activity, acting on glyco…	6960 // antimicrobial humoral response (sensu Protostomia) // non-traceable author statement /// 16998 // cell wall catabolism // inferred from electronic annotation /// 5975 // carbohydrate metabolism // inferred from electronic annotation /// 19835 // cytolysis // inferred from electronic annotation /// 42742 // defense response to bacteria // inferred from electronic annotation	5576 // extracellular region // inferred from electronic annotation	IPR001916 // Glycoside hydrolase, family 22 // 6.7E-53
5101	146300_at	-0.32631	1.24022	-6.37648	3.95946e-07	6.74842e-06	6.33204	FBgn0032457	CG15483	CG15483	CG15483	34687	8532 // N-acetyllactosaminide beta-1,3-N-acetylglucosaminyltransferase activity // inferred from sequence or structural similarity /// 8532 // N-acetyllactosaminide beta-1,3-N-acetylglucosaminyltransferase activity // inferred from sequence similarity	---	---	---
6599	147798_at	-0.327315	1.52769	-6.3733	3.99546e-07	6.79716e-06	6.32309	FBgn0034893	CG5479	mRpL43	mitochondrial ribosomal protein L43	37750	3735 // structural constituent of ribosome // inferred from sequence or structural similarity /// 3735 // structural constituent of ribosome // inferred from sequence similarity	6412 // protein biosynthesis // inferred from sequence or structural similarity /// 6412 // protein biosynthesis // inferred from sequence similarity	5762 // mitochondrial large ribosomal subunit // inferred from sequence or structural similarity /// 5762 // mitochondrial large ribosomal subunit // inferred from sequence similarity	IPR007741 // Mitochondrial ribosome // 2.9E-49
248	141447_at	-0.401459	0.76107	-6.36452	4.09641e-07	6.91455e-06	6.29843	FBgn0036436	CG4914	CG4914	CG4914	39597	3677 // DNA binding // inferred from electronic annotation /// 3700 // transcription factor activity // inferred from electronic annotation /// 4252 // serine-type endopeptidase activity // inferred from sequence or structural similarity /// 4263 // chymotrypsin activity // inferred from electronic annotation /// 4295 // trypsin activity // non-traceable author statement /// 4252 // serine-type e…	6355 // regulation of transcription, DNA-dependent // inferred from electronic annotation /// 6508 // proteolysis // non-traceable author statement /// 6508 // proteolysis // inferred from electronic annotation	5634 // nucleus // inferred from electronic annotation	IPR001254 // Peptidase S1, chymotrypsin // 1.3E-87
6520	147719_at	-0.416804	0.126804	-6.35072	4.26051e-07	7.16563e-06	6.25961	FBgn0034784	CG9826	CG9826	CG9826	37625	5316 // high affinity inorganic phosphate:sodium symporter activity // inferred from sequence or structural similarity /// 5316 // high affinity inorganic phosphate:sodium symporter activity // inferred from sequence similarity	6796 // phosphate metabolism // inferred from electronic annotation /// 6812 // cation transport // inferred from electronic annotation /// 6817 // phosphate transport // inferred from electronic annotation /// 6858 // extracellular transport // inferred from electronic annotation	16021 // integral to membrane // inferred from electronic annotation	---
2846	144045_at	-0.636066	1.08067	-6.34739	4.30097e-07	7.22502e-06	6.25027	FBgn0024994	CG2675	Csat	Csat	31255	5351 // sugar porter activity // inferred from electronic annotation /// 5456 // CMP-sialic acid transporter activity // inferred from direct assay /// 5459 // UDP-galactose transporter activity // inferred from direct assay /// 5459 // UDP-galactose transporter activity // inferred from sequence or structural similarity /// 5459 // UDP-galactose transporter activity // non-traceable author state…	5975 // carbohydrate metabolism // inferred from electronic annotation /// 6486 // protein amino acid glycosylation // inferred from electronic annotation /// 15757 // galactose transport // inferred from direct assay /// 15782 // CMP-sialic acid transport // inferred from direct assay /// 15785 // UDP-galactose transport // inferred from direct assay /// 15785 // UDP-galactose transport // non-t…	139 // Golgi membrane // inferred from electronic annotation /// 16021 // integral to membrane // inferred from electronic annotation	IPR007271 // Nucleotide-sugar transporter // 1.0E-126
5977	147176_at	-0.324306	1.34912	-6.34602	4.31775e-07	7.24451e-06	6.24643	FBgn0033883	CG16935	CG16935	CG16935	36540	4024 // alcohol dehydrogenase activity, zinc-dependent // inferred from electronic annotation /// 8270 // zinc ion binding // inferred from electronic annotation /// 16491 // oxidoreductase activity // inferred from electronic annotation /// 19166 // trans-2-enoyl-CoA reductase (NADPH) activity // inferred from sequence or structural similarity /// 19166 // trans-2-enoyl-CoA reductase (NADPH) act…	5975 // carbohydrate metabolism // inferred from electronic annotation /// 6631 // fatty acid metabolism // inferred from sequence or structural similarity /// 6631 // fatty acid metabolism // inferred from sequence similarity	5739 // mitochondrion // inferred from sequence or structural similarity /// 5739 // mitochondrion // inferred from sequence similarity	IPR002085 // Zinc-containing alcohol dehydrogenase superfamily // 6.9E-51
8654	149853_at	-0.401295	1.12838	-6.34477	4.33323e-07	7.2594e-06	6.24289	FBgn0038166	CG9588	CG9588	CG9588	41672	5515 // protein binding // inferred from electronic annotation /// 8233 // peptidase activity // inferred from electronic annotation /// 5515 // protein binding // inferred from physical interaction	6508 // proteolysis // inferred from sequence or structural similarity /// 6508 // proteolysis // inferred from sequence similarity	5838 // proteasome regulatory particle (sensu Eukaryota) // inferred from sequence or structural similarity /// 5838 // proteasome regulatory particle (sensu Eukaryota) // inferred from sequence similarity	---
9300	150499_at	-0.471666	1.00632	-6.34362	4.34743e-07	7.2682e-06	6.23965	FBgn0039178	CG6356	CG6356	CG6356	42893	8513 // organic cation porter activity // inferred from sequence or structural similarity /// 15144 // carbohydrate transporter activity // inferred from electronic annotation /// 5215 // transporter activity // inferred from electronic annotation /// 8513 // organic cation porter activity // inferred from sequence similarity	5975 // carbohydrate metabolism // inferred from electronic annotation /// 6812 // cation transport // inferred from electronic annotation /// 6858 // extracellular transport // inferred from electronic annotation /// 8643 // carbohydrate transport // inferred from electronic annotation /// 6810 // transport // inferred from electronic annotation	16021 // integral to membrane // inferred from electronic annotation /// 16020 // membrane // inferred from electronic annotation	IPR005828 // General substrate transporter // 8.8E-13
7289	148488_at	-0.647921	0.787002	-6.34273	4.35843e-07	7.27791e-06	6.23716	FBgn0052046	CG32046	CG32046	CG32046	39145	---	---	---	---
13537	154736_at	-0.486398	1.77698	-6.33013	4.5175e-07	7.50773e-06	6.20173	FBgn0032476	CG5439	CG5439	CG5439	34710	5515 // protein binding // inferred from electronic annotation /// 35091 // phosphoinositide binding // inferred from electronic annotation	7242 // intracellular signaling cascade // inferred from electronic annotation	---	IPR001683 // Phox-like // 3.4E-27 /// IPR004012 // RUN domain // 1.3E-60
2485	143684_at	-0.471081	0.583221	-6.32442	4.59155e-07	7.59476e-06	6.18567	FBgn0011739	CG12072	wts	warts	43651	4674 // protein serine/threonine kinase activity // inferred from sequence or structural similarity /// 4674 // protein serine/threonine kinase activity // non-traceable author statement /// 4702 // receptor signaling protein serine/threonine kinase activity // inferred from electronic annotation /// 5515 // protein binding // traceable author statement /// 5524 // ATP binding // inferred from el…	74 // regulation of progression through cell cycle // inferred from electronic annotation /// 82 // G1/S transition of mitotic cell cycle // inferred from mutant phenotype /// 910 // cytokinesis // inferred from electronic annotation /// 6468 // protein amino acid phosphorylation // non-traceable author statement /// 7067 // mitosis // inferred from electronic annotation /// 7242 // intracellular…	---	IPR000719 // Protein kinase // 6.0E-69 /// IPR000961 // Protein kinase C-terminal domain // 8.9E-8 /// IPR000719 // Protein kinase // 3.6E-16
5388	146587_at	-0.894136	2.22396	-6.31963	4.65455e-07	7.68988e-06	6.1722	FBgn0032947	CG17571	CG17571	CG17571	35409	4252 // serine-type endopeptidase activity // inferred from sequence or structural similarity /// 4263 // chymotrypsin activity // inferred from electronic annotation /// 4295 // trypsin activity // non-traceable author statement /// 4252 // serine-type endopeptidase activity // inferred from sequence similarity	6508 // proteolysis // non-traceable author statement	---	IPR001254 // Peptidase S1, chymotrypsin // 3.6E-83
2582	143781_at	-0.628765	2.24211	-6.31866	4.66746e-07	7.70213e-06	6.16946	FBgn0015035	CG4105	Cyp4e3	Cytochrome P450-4e3	34291	4497 // monooxygenase activity // inferred from electronic annotation /// 16491 // oxidoreductase activity // inferred from electronic annotation /// 5506 // iron ion binding // inferred from electronic annotation /// 20037 // heme binding // inferred from electronic annotation /// 46872 // metal ion binding // inferred from electronic annotation	6118 // electron transport // inferred from electronic annotation /// 8202 // steroid metabolism // inferred from electronic annotation	5792 // microsome // non-traceable author statement /// 16020 // membrane // non-traceable author statement /// 5783 // endoplasmic reticulum // inferred from electronic annotation /// 5792 // microsome // inferred from electronic annotation /// 16020 // membrane // inferred from electronic annotation	IPR001128 // Cytochrome P450 // 3.7E-94 /// IPR001128 // Cytochrome P450 // 5.6E-76
6558	147757_at	-0.537407	1.39309	-6.31673	4.6932e-07	7.7264e-06	6.16403	FBgn0034837	CG9871	CG9871	CG9871	37684	3676 // nucleic acid binding // inferred from electronic annotation /// 3735 // structural constituent of ribosome // inferred from sequence or structural similarity /// 3735 // structural constituent of ribosome // inferred from electronic annotation /// 3735 // structural constituent of ribosome // inferred from sequence similarity	6412 // protein biosynthesis // inferred from sequence or structural similarity /// 6412 // protein biosynthesis // inferred from electronic annotation /// 6412 // protein biosynthesis // inferred from sequence similarity	5842 // cytosolic large ribosomal subunit (sensu Eukaryota) // inferred from sequence or structural similarity /// 5622 // intracellular // inferred from electronic annotation /// 5840 // ribosome // inferred from electronic annotation /// 5842 // cytosolic large ribosomal subunit (sensu Eukaryota) // inferred from sequence similarity	IPR002671 // Ribosomal L22e protein // 8.1E-44
3367	144566_at	-0.282794	-0.010188	-6.31278	4.74635e-07	7.80474e-06	6.1529	FBgn0029830	CG14447	Grip	Glutamate receptor binding protein	50391	5515 // protein binding // inferred from electronic annotation /// 35254 // glutamate receptor binding // inferred from sequence or structural similarity /// 35254 // glutamate receptor binding // inferred from sequence similarity	16204 // determination of muscle attachment site // inferred from mutant phenotype	---	IPR001478 // PDZ/DHR/GLGF domain // 1.7E-14 /// IPR001478 // PDZ/DHR/GLGF domain // 9.2E-7 /// IPR001478 // PDZ/DHR/GLGF domain // 8.3E-11 /// IPR001478 // PDZ/DHR/GLGF domain // 2.8E-16
9816	151015_at	-0.483006	1.98322	-6.30896	4.79816e-07	7.87146e-06	6.14217	FBgn0040528	CG18749 /// CG33722 /// CG15864	CG15864	CG15864	50001	16491 // oxidoreductase activity // inferred from electronic annotation /// 16706 // oxidoreductase activity, acting on paired donors, with incorporation or reduction of molecular oxygen, 2-oxoglutarate as one donor, and incorporation of one atom each of oxygen into both donors // inferred from electronic annotation /// 4656 // procollagen-proline 4-dioxygenase activity // inferred from sequence …	6464 // protein modification // inferred from electronic annotation /// 19538 // protein metabolism // inferred from electronic annotation /// 18401 // peptidyl-proline hydroxylation to 4-hydroxy-L-proline // inferred from sequence or structural similarity /// 7165 // signal transduction // inferred from electronic annotation	16222 // procollagen-proline, 2-oxoglutarate-4-dioxygenase complex // Unknown	---
9697	150896_at	-0.519604	1.11378	-6.30488	4.85427e-07	7.95419e-06	6.13069	FBgn0039782	CG15539	CG15539	CG15539	43627	4656 // procollagen-proline 4-dioxygenase activity // inferred from sequence or structural similarity /// 16706 // oxidoreductase activity, acting on paired donors, with incorporation or reduction of molecular oxygen, 2-oxoglutarate as one donor, and incorporation of one atom each of oxygen into both donors // inferred from electronic annotation /// 4656 // procollagen-proline 4-dioxygenase activ…	18401 // peptidyl-proline hydroxylation to 4-hydroxy-L-proline // inferred from sequence or structural similarity /// 19538 // protein metabolism // inferred from electronic annotation /// 18401 // peptidyl-proline hydroxylation to 4-hydroxy-L-proline // inferred from sequence similarity	16222 // procollagen-proline, 2-oxoglutarate-4-dioxygenase complex // Unknown /// 16222 // procollagen-proline, 2-oxoglutarate-4-dioxygenase complex // inferred from curator	---
7676	148875_at	-0.48338	0.345993	-6.29798	4.9506e-07	8.09311e-06	6.11127	FBgn0036602	CG13042	CG13042	CG13042	39798	5515 // protein binding // inferred from physical interaction	---	---	IPR007614 // Retinin-like protein // 4.8E-27
7884	149083_at	-0.453297	1.80224	-6.29699	4.96458e-07	8.1065e-06	6.10848	FBgn0036925	CG17736	schuy	schumacher-levy	40184	---	---	---	---
5189	146388_at	-0.910469	2.25746	-6.29634	4.97375e-07	8.11202e-06	6.10666	FBgn0051781	CG31781	CG31781	CG31781	35023	---	---	---	---
1492	142691_at	-0.362949	1.38185	-6.29064	5.05519e-07	8.23002e-06	6.09061	FBgn0035372	CG12093	CG12093	CG12093	38343	---	---	---	---
2459	143658_at	-0.463719	3.27884	-6.28708	5.10672e-07	8.29029e-06	6.08059	FBgn0011361	CG9160	mtacp1	mitochondrial acyl carrier protein 1	38154	36 // acyl carrier activity // inferred from electronic annotation /// 3954 // NADH dehydrogenase activity // inferred from sequence or structural similarity /// 8137 // NADH dehydrogenase (ubiquinone) activity // inferred from sequence or structural similarity /// 8137 // NADH dehydrogenase (ubiquinone) activity // non-traceable author statement /// 48037 // cofactor binding // inferred from ele…	6120 // mitochondrial electron transport, NADH to ubiquinone // inferred from sequence or structural similarity /// 6633 // fatty acid biosynthesis // inferred from electronic annotation /// 8610 // lipid biosynthesis // inferred from electronic annotation /// 6120 // mitochondrial electron transport, NADH to ubiquinone // inferred from sequence similarity	5739 // mitochondrion // non-traceable author statement /// 5747 // respiratory chain complex I (sensu Eukaryota) // inferred from sequence or structural similarity /// 5739 // mitochondrion // inferred from electronic annotation /// 5747 // respiratory chain complex I (sensu Eukaryota) // inferred from sequence similarity	IPR006163 // Phosphopantetheine-binding domain // 4.3E-14 /// IPR006163 // Phosphopantetheine-binding domain // 1.2E-14
10504	151703_at	-0.588056	2.3768	-6.28459	5.14309e-07	8.33966e-06	6.07358	FBgn0031057	CG14224	CG14224	CG14224	32977	5515 // protein binding // inferred from physical interaction /// 16491 // oxidoreductase activity // inferred from electronic annotation	6508 // proteolysis // inferred from electronic annotation /// 19538 // protein metabolism // inferred from electronic annotation /// 6464 // protein modification // inferred from electronic annotation	---	IPR000626 // Ubiquitin // 5.1E-22 /// IPR000449 // Ubiquitin-associated domain // 3.0E-7
113	141312_at	-0.366312	1.71921	-6.28239	5.17551e-07	8.38253e-06	6.06737	FBgn0034725	CG6044	CG6044	CG6044	37558	---	---	---	---
8754	149953_at	-0.357208	0.980487	-6.27852	5.23295e-07	8.46578e-06	6.05647	FBgn0038331	CG5073	CG5073	CG5073	41876	---	---	---	IPR009652 // Protein of unknown function DUF1241 // 3.2E-60
9678	150877_at	-0.50935	0.866645	-6.27392	5.30198e-07	8.55768e-06	6.04352	FBgn0039752	CG15530	CG15530	CG15530	43589	---	---	---	---
10977	152176_at	-1.23318	5.09252	-6.26385	5.45639e-07	8.77658e-06	6.01515	FBgn0040060	CG6457	yip7	yippee interacting protein 7	38680	4252 // serine-type endopeptidase activity // inferred from sequence or structural similarity /// 4263 // chymotrypsin activity // non-traceable author statement /// 4295 // trypsin activity // inferred from electronic annotation /// 4252 // serine-type endopeptidase activity // inferred from electronic annotation /// 8233 // peptidase activity // inferred from electronic annotation /// 16787 // …	6508 // proteolysis // non-traceable author statement /// 6508 // proteolysis // inferred from electronic annotation	---	IPR001254 // Peptidase S1, chymotrypsin // 1.4E-69
4919	146118_at	-0.410426	0.357213	-6.2609	5.50242e-07	8.83034e-06	6.00686	FBgn0053302	CG33302	CG33302	CG33302	2768918	5214 // structural constituent of cuticle (sensu Insecta) // inferred from sequence or structural similarity /// 42302 // structural constituent of cuticle // inferred from electronic annotation /// 5214 // structural constituent of cuticle (sensu Insecta) // inferred from sequence similarity	---	---	IPR000618 // Insect cuticle protein // 6.4E-28
4768	145967_at	-0.509013	0.130215	-6.25791	5.54949e-07	8.88553e-06	5.99844	FBgn0031927	CG13792	CG13792	CG13792	34038	---	---	---	---
3509	144708_at	-0.488656	0.0863977	-6.25483	5.59858e-07	8.94369e-06	5.98974	FBgn0030055	CG12772	CG12772	CG12772	31803	---	---	---	---
7720	148919_at	-0.516774	2.4248	-6.25424	5.60796e-07	8.94847e-06	5.98808	FBgn0036669 /// FBgn0064442	CG13030	CG13030 /// DpseGA11985	CG13030 /// GA11985	39885	4842 // ubiquitin-protein ligase activity // inferred from electronic annotation /// 8270 // zinc ion binding // inferred from electronic annotation /// 16874 // ligase activity // inferred from sequence or structural similarity /// 5515 // protein binding // inferred from electronic annotation /// 16874 // ligase activity // inferred from electronic annotation /// 46872 // metal ion binding // i…	6511 // ubiquitin-dependent protein catabolism // inferred from sequence or structural similarity /// 7423 // sensory organ development // inferred from sequence or structural similarity /// 16567 // protein ubiquitination // inferred from electronic annotation /// 45676 // regulation of R7 differentiation // inferred from sequence or structural similarity /// 6511 // ubiquitin-dependent protein …	151 // ubiquitin ligase complex // inferred from electronic annotation /// 5634 // nucleus // inferred from sequence or structural similarity /// 5634 // nucleus // inferred from electronic annotation /// 5634 // nucleus // inferred from sequence similarity	IPR004162 // Seven in absentia protein family // 1.0E-126
937	142136_at	-0.343162	0.477136	-6.24928	5.68779e-07	9.00557e-06	5.97412	FBgn0031737	CG11142	CG11142	CG11142	33806	8061 // chitin binding // inferred from electronic annotation /// 16490 // structural constituent of peritrophic membrane (sensu Insecta) // inferred from sequence or structural similarity /// 5515 // protein binding // inferred from physical interaction /// 16490 // structural constituent of peritrophic membrane (sensu Insecta) // inferred from sequence similarity	6030 // chitin metabolism // inferred from electronic annotation	5576 // extracellular region // inferred from electronic annotation	IPR002557 // Chitin binding Peritrophin-A // 3.0E-13 /// IPR002557 // Chitin binding Peritrophin-A // 1.6E-13 /// IPR002557 // Chitin binding Peritrophin-A // 3.5E-13
4823	146022_at	-0.494037	1.4089	-6.24929	5.68761e-07	9.00557e-06	5.97415	FBgn0032022	CG14275	CG14275	CG14275	34144	---	---	---	---
6727	147926_at	-0.635516	0.441086	-6.25048	5.66849e-07	9.00557e-06	5.97748	FBgn0035134	CG1231	CG1231	CG1231	38060	3676 // nucleic acid binding // inferred from electronic annotation /// 8270 // zinc ion binding // inferred from electronic annotation	---	5634 // nucleus // inferred from electronic annotation	---
8961	150160_at	-0.335986	0.294007	-6.24926	5.68813e-07	9.00557e-06	5.97406	FBgn0038646	CG7715	CG7715	CG7715	42251	---	---	---	---
9996	151195_i_at	-0.439575	1.71436	-6.25024	5.6723e-07	9.00557e-06	5.97682	FBgn0040718	CG15353	CG15353	CG15353	50191	---	---	---	---
12650	153849_at	-0.403945	2.95408	-6.2476	5.71512e-07	9.03711e-06	5.96939	FBgn0021979	CG3082	l(2)k09913	lethal (2) k09913	37661	5515 // protein binding // inferred from physical interaction	---	---	IPR008547 // Eukaryotic protein of unknown function DUF829 // 9.8E-99 /// IPR008547 // Eukaryotic protein of unknown function DUF829 // 9.8E-99
1547	142746_at	-0.789528	3.86726	-6.24682	5.72783e-07	9.04699e-06	5.96719	FBgn0002719	CG10120	Men	Malic enzyme	47173	4473 // malate dehydrogenase (oxaloacetate-decarboxylating) (NADP+) activity // inferred from direct assay /// 4473 // malate dehydrogenase (oxaloacetate-decarboxylating) (NADP+) activity // inferred from sequence or structural similarity /// 16831 // carboxy-lyase activity // inferred from electronic annotation /// 4470 // malic enzyme activity // inferred from electronic annotation /// 16616 //…	6099 // tricarboxylic acid cycle // inferred from electronic annotation /// 6108 // malate metabolism // inferred from electronic annotation	---	IPR001891 // Malic oxidoreductase // 1.0E-126 /// IPR001891 // Malic oxidoreductase // 1.0E-126 /// IPR001891 // Malic oxidoreductase // 1.0E-126 /// IPR001891 // Malic oxidoreductase // 1.0E-126 /// IPR001891 // Malic oxidoreductase // 1.4E-45 /// IPR001891 // Malic oxidoreductase // 6.4E-121 /// IPR001891 // Malic oxidoreductase // 1.0E-126
4040	145239_at	-0.540888	1.09996	-6.24632	5.73603e-07	9.04974e-06	5.96578	FBgn0030832	CG10597	CG10597	CG10597	32714	---	---	---	---
579	141778_at	-0.650707	1.40146	-6.2452	5.75449e-07	9.06426e-06	5.9626	FBgn0039136	CG5902	CG5902	CG5902	42839	---	---	---	IPR002733 // Protein of unknown function DUF51 // 4.6E-35
5762	146961_at	-0.557311	0.473115	-6.24497	5.75817e-07	9.06426e-06	5.96197	FBgn0053144	CG33144	CG33144	CG33144	36131	4842 // ubiquitin-protein ligase activity // inferred from electronic annotation /// 8270 // zinc ion binding // inferred from electronic annotation /// 5515 // protein binding // inferred from physical interaction /// 5515 // protein binding // inferred from electronic annotation /// 46872 // metal ion binding // inferred from electronic annotation	16567 // protein ubiquitination // inferred from electronic annotation	151 // ubiquitin ligase complex // inferred from electronic annotation	IPR002867 // Zn-finger, cysteine-rich C6HC // 3.3E-26
12124	153323_at	-0.42544	2.93452	-6.23504	5.92357e-07	9.27253e-06	5.934	FBgn0023537	CG17896	CG17896	CG17896	30995	4491 // methylmalonate-semialdehyde dehydrogenase (acylating) activity // inferred from sequence or structural similarity /// 4491 // methylmalonate-semialdehyde dehydrogenase (acylating) activity // inferred from electronic annotation /// 16491 // oxidoreductase activity // inferred from electronic annotation /// 4491 // methylmalonate-semialdehyde dehydrogenase (acylating) activity // inferred …	6206 // pyrimidine base metabolism // inferred from sequence or structural similarity /// 6573 // valine metabolism // inferred from sequence or structural similarity /// 9063 // amino acid catabolism // inferred from electronic annotation /// 6573 // valine metabolism // inferred from electronic annotation /// 8152 // metabolism // inferred from electronic annotation /// 6206 // pyrimidine base …	5739 // mitochondrion // inferred from sequence or structural similarity /// 5739 // mitochondrion // inferred from sequence similarity	IPR002086 // Aldehyde dehydrogenase // 1.0E-126 /// IPR002086 // Aldehyde dehydrogenase // 1.0E-126
7097	148296_at	-0.380581	-0.19836	-6.23354	5.949e-07	9.30196e-06	5.92976	FBgn0045759	CG18647	bin	biniou	---	3677 // DNA binding // inferred from electronic annotation /// 3700 // transcription factor activity // inferred from electronic annotation /// 43565 // sequence-specific DNA binding // inferred from electronic annotation	1710 // mesodermal cell fate commitment // inferred from mutant phenotype /// 6355 // regulation of transcription, DNA-dependent // inferred from electronic annotation	5634 // nucleus // inferred from electronic annotation	IPR001766 // Fork head transcription factor // 5.8E-39
8774	149973_at	-0.43286	2.02569	-6.22863	6.03305e-07	9.4019e-06	5.9159	FBgn0038361	CG9589	CG9589	CG9589	41908	4852 // uroporphyrinogen-III synthase activity // inferred from electronic annotation /// 4852 // uroporphyrinogen-III synthase activity // inferred from sequence or structural similarity /// 16787 // hydrolase activity // inferred from electronic annotation /// 4852 // uroporphyrinogen-III synthase activity // inferred from sequence similarity	6778 // porphyrin metabolism // inferred from electronic annotation /// 6779 // porphyrin biosynthesis // inferred from electronic annotation /// 6783 // heme biosynthesis // inferred from electronic annotation	---	---
5370	146569_at	-0.954465	2.37369	-6.22586	6.08078e-07	9.46575e-06	5.90812	FBgn0032913	CG9259	CG9259	CG9259	35372	16301 // kinase activity // inferred from electronic annotation /// 16740 // transferase activity // inferred from electronic annotation	---	---	IPR004119 // Protein of unknown function DUF227 // 1.0E-85
5396	146595_at	-0.297628	0.712386	-6.22179	6.15189e-07	9.55521e-06	5.89663	FBgn0032957	CG2225	CG2225	CG2225	35421	5515 // protein binding // inferred from physical interaction	---	---	---
11719	152918_at	-0.481347	2.99517	-6.21721	6.23292e-07	9.63832e-06	5.88371	FBgn0037308	CG31543	Hph	HIF prolyl hydroxylase	40633	16706 // oxidoreductase activity, acting on paired donors, with incorporation or reduction of molecular oxygen, 2-oxoglutarate as one donor, and incorporation of one atom each of oxygen into both donors // inferred from electronic annotation /// 31545 // peptidyl-proline 4-dioxygenase activity // inferred from sequence or structural similarity /// 5515 // protein binding // inferred from physical…	1666 // response to hypoxia // inferred from mutant phenotype /// 7424 // tracheal system development (sensu Insecta) // non-traceable author statement /// 8104 // protein localization // inferred from mutant phenotype /// 19538 // protein metabolism // inferred from electronic annotation	---	IPR005123 // 2OG-Fe(II) oxygenase superfamily // 7.5E-16 /// IPR002893 // Zn-finger, MYND type // 1.6E-16 /// IPR005123 // 2OG-Fe(II) oxygenase superfamily // 7.5E-16 /// IPR005123 // 2OG-Fe(II) oxygenase superfamily // 7.5E-16
4600	145799_at	-0.372275	1.92616	-6.20772	6.40402e-07	9.87022e-06	5.85696	FBgn0031659	CG14043	CG14043	CG14043	33714	5488 // binding // inferred from electronic annotation	---	---	---
4527	145726_at	-0.332301	-0.255077	-6.20399	6.47252e-07	9.96484e-06	5.84645	FBgn0031556	CG2808	CG2808	CG2808	33587	3700 // transcription factor activity // inferred from sequence or structural similarity /// 3700 // transcription factor activity // inferred from sequence similarity	6355 // regulation of transcription, DNA-dependent // inferred from electronic annotation	5634 // nucleus // inferred from sequence or structural similarity /// 5634 // nucleus // inferred from sequence similarity	IPR001356 // Homeobox // 3.7E-4
1237	142436_at	-0.390312	1.04496	-6.20148	6.5191e-07	1.00145e-05	5.83936	FBgn0051493	CG31493	CG31493	CG31493	318765	---	---	---	---
3736	144935_at	-0.653251	0.255841	-6.20014	6.5441e-07	1.00169e-05	5.83558	FBgn0030388	CG11245	CG11245	CG11245	32192	---	---	---	---
9336	150535_at	-0.408726	0.263656	-6.19999	6.54684e-07	1.00169e-05	5.83517	FBgn0051121	CG31121	CG31121	CG31121	42975	5215 // transporter activity // inferred from sequence or structural similarity /// 5524 // ATP binding // inferred from electronic annotation /// 42626 // ATPase activity, coupled to transmembrane movement of substances // inferred from sequence or structural similarity /// 166 // nucleotide binding // inferred from electronic annotation /// 16887 // ATPase activity // inferred from electronic a…	6810 // transport // inferred from sequence or structural similarity /// 6810 // transport // inferred from electronic annotation /// 6810 // transport // inferred from sequence similarity	43190 // ATP-binding cassette (ABC) transporter complex // inferred from sequence or structural similarity /// 16020 // membrane // inferred from electronic annotation /// 16021 // integral to membrane // inferred from electronic annotation /// 43190 // ATP-binding cassette (ABC) transporter complex // inferred from sequence similarity	---
1448	142647_at	-0.550632	0.451059	-6.19192	6.69961e-07	1.02134e-05	5.81238	FBgn0051092	CG31092	LpR2	LpR2	43105	5041 // low-density lipoprotein receptor activity // inferred from sequence or structural similarity /// 5509 // calcium ion binding // inferred from electronic annotation /// 5041 // low-density lipoprotein receptor activity // inferred from sequence similarity	6886 // intracellular protein transport // inferred from electronic annotation /// 6898 // receptor mediated endocytosis // inferred from electronic annotation /// 7292 // female gamete generation // inferred from electronic annotation /// 8203 // cholesterol metabolism // inferred from electronic annotation	16020 // membrane // inferred from electronic annotation	IPR006209 // EGF-like domain // 1.7E-7 /// IPR002172 // Low density lipoprotein-receptor, class A // 1.2E-15 /// IPR002172 // Low density lipoprotein-receptor, class A // 1.1E-20 /// IPR002172 // Low density lipoprotein-receptor, class A // 2.1E-14 /// IPR002172 // Low density lipoprotein-receptor, class A // 5.2E-17 /// IPR002172 // Low density lipoprotein-receptor, class A // 1.5E-16 /// IPR002…
12339	153538_at	-0.357364	2.23184	-6.18337	6.86524e-07	1.0398e-05	5.78826	FBgn0033717	CG8839	CG8839	CG8839	36340	17064 // fatty acid amide hydrolase activity // inferred from sequence or structural similarity /// 4040 // amidase activity // inferred from electronic annotation /// 17064 // fatty acid amide hydrolase activity // inferred from sequence similarity	6807 // nitrogen compound metabolism // inferred from electronic annotation	---	IPR000120 // Amidase // 1.8E-56 /// IPR000120 // Amidase // 1.7E-15
8621	149820_at	-0.391175	-0.539289	-6.1818	6.89596e-07	1.0417e-05	5.78385	FBgn0038119	CG17319	CG17319	CG17319	41616	---	---	---	IPR001611 // Leucine-rich repeat // 0.025 /// IPR001611 // Leucine-rich repeat // 2.2E-4 /// IPR001611 // Leucine-rich repeat // 5.1E-4
10278	151477_at	-0.434844	1.44975	-6.17512	7.02886e-07	1.05886e-05	5.765	FBgn0031737	CG11142	CG11142	CG11142	33806	8061 // chitin binding // inferred from electronic annotation /// 16490 // structural constituent of peritrophic membrane (sensu Insecta) // inferred from sequence or structural similarity /// 5515 // protein binding // inferred from physical interaction /// 16490 // structural constituent of peritrophic membrane (sensu Insecta) // inferred from sequence similarity	6030 // chitin metabolism // inferred from electronic annotation	5576 // extracellular region // inferred from electronic annotation	IPR002557 // Chitin binding Peritrophin-A // 2.2E-10 /// IPR002557 // Chitin binding Peritrophin-A // 8.0E-14 /// IPR002557 // Chitin binding Peritrophin-A // 1.7E-12
4200	145399_f_at	-0.360638	1.24442	-6.17126	7.10694e-07	1.06948e-05	5.75409	FBgn0026174	CG12700	skpD	skpD	32995	3676 // nucleic acid binding // inferred from electronic annotation /// 19237 // centromeric DNA binding // inferred from electronic annotation	6508 // proteolysis // inferred from electronic annotation /// 7049 // cell cycle // inferred from electronic annotation /// 7059 // chromosome segregation // inferred from electronic annotation /// 7067 // mitosis // inferred from electronic annotation /// 19538 // protein metabolism // inferred from electronic annotation	---	IPR001232 // SKP1 component // 6.8E-32 /// IPR001232 // SKP1 component // 4.5E-23
4226	145425_at	-0.466677	1.98106	-6.1655	7.22475e-07	1.08487e-05	5.73785	FBgn0031110	CG1670	Obp19b	Odorant-binding protein 19b	33038	5549 // odorant binding // inferred from sequence or structural similarity /// 5549 // odorant binding // non-traceable author statement /// 5549 // odorant binding // inferred from electronic annotation /// 5549 // odorant binding // inferred from sequence similarity	6810 // transport // inferred from electronic annotation /// 7606 // sensory perception of chemical stimulus // inferred from sequence or structural similarity /// 7606 // sensory perception of chemical stimulus // inferred from sequence similarity	5576 // extracellular region // non-traceable author statement	IPR006170 // Pheromone/general odorant binding protein, PBP/GOBP // 2.5E-18
6552	147751_at	-0.448875	-0.286799	-6.15882	7.36399e-07	1.10224e-05	5.719	FBgn0050188	CG30188	CG30188	CG30188	37678	5515 // protein binding // inferred from electronic annotation	7165 // signal transduction // inferred from electronic annotation /// 16337 // cell-cell adhesion // inferred from electronic annotation /// 7155 // cell adhesion // inferred from electronic annotation	16020 // membrane // inferred from electronic annotation	IPR007110 // Immunoglobulin-like // 0.046 /// IPR007110 // Immunoglobulin-like // 1.7E-5 /// IPR007110 // Immunoglobulin-like // 0.43 /// IPR007110 // Immunoglobulin-like // 1.3E-6
3326	144525_at	-0.609219	0.910032	-6.15788	7.38394e-07	1.10287e-05	5.71633	FBgn0029771	CG12730	CG12730	CG12730	31466	---	---	---	---
4063	145262_at	-0.350472	0.256267	-6.1562	7.41949e-07	1.10582e-05	5.71158	FBgn0030868	CG12986	CG12986	CG12986	32759	---	---	---	---
7601	148800_at	-0.433476	0.889123	-6.15153	7.5192e-07	1.11357e-05	5.6984	FBgn0036495	CG33259	CG33259	CG33259	2768950	---	---	---	IPR002919 // Trypsin inhibitor-like, cysteine-rich TIL region // 1.0E-17
1019	142218_at	-0.347253	0.307531	-6.1498	7.55645e-07	1.11673e-05	5.69352	FBgn0025838	CG2652	CG2652	CG2652	31250	5515 // protein binding // inferred from physical interaction	6355 // regulation of transcription, DNA-dependent // inferred from electronic annotation	5634 // nucleus // inferred from electronic annotation	---
1442	142641_at	-0.356451	0.495534	-6.14941	7.56477e-07	1.11678e-05	5.69243	FBgn0031344	CG7420	CG7420	CG7420	33332	5083 // small GTPase regulator activity // inferred from electronic annotation /// 5085 // guanyl-nucleotide exchange factor activity // inferred from electronic annotation	6139 // nucleobase, nucleoside, nucleotide and nucleic acid metabolism // inferred from electronic annotation /// 6810 // transport // inferred from electronic annotation /// 15931 // nucleobase, nucleoside, nucleotide and nucleic acid transport // inferred from electronic annotation	---	IPR000408 // Regulator of chromosome condensation, RCC1 // 3.0E-5
11446	152645_at	-0.526657	3.04078	-6.14774	7.60095e-07	1.12094e-05	5.68772	FBgn0031690	CG7742	CG7742	CG7742	33750	5515 // protein binding // inferred from physical interaction	---	---	---
7909	149108_at	-0.535535	-0.0722117	-6.14516	7.65737e-07	1.12807e-05	5.68042	FBgn0036960	CG13814	CG13814	CG13814	40223	---	---	---	---
3212	144411_at	-0.347378	0.315336	-6.14272	7.71092e-07	1.13239e-05	5.67353	FBgn0040334	CG10742	Tsp3A	Tetraspanin 3A	31244	5102 // receptor binding // inferred from electronic annotation	7165 // signal transduction // inferred from electronic annotation /// 16337 // cell-cell adhesion // inferred from electronic annotation	16021 // integral to membrane // inferred from sequence or structural similarity /// 16021 // integral to membrane // inferred from electronic annotation /// 16021 // integral to membrane // inferred from sequence similarity	IPR000301 // CD9/CD37/CD63 antigen // 2.1E-75
11451	152650_at	-0.41458	1.37422	-6.13961	7.77973e-07	1.1413e-05	5.66476	FBgn0032495	CG16820	CG16820	CG16820	34730	---	---	---	IPR004272 // Odorant binding protein // 2.6E-44
1709	142908_at	-0.422741	1.5464	-6.1376	7.82454e-07	1.14311e-05	5.65909	FBgn0039150	CG13605	CG13605	CG13605	42858	4842 // ubiquitin-protein ligase activity // inferred from electronic annotation /// 8270 // zinc ion binding // inferred from electronic annotation /// 5515 // protein binding // inferred from electronic annotation /// 46872 // metal ion binding // inferred from electronic annotation	16567 // protein ubiquitination // inferred from electronic annotation	151 // ubiquitin ligase complex // inferred from electronic annotation	IPR001841 // Zn-finger, RING // 3.6E-17
2134	143333_at	-0.409742	0.395847	-6.13718	7.834e-07	1.14311e-05	5.65789	FBgn0003326	CG17579	sca	scabrous	36411	4871 // signal transducer activity // traceable author statement /// 5102 // receptor binding // inferred from electronic annotation /// 5515 // protein binding // inferred from physical interaction	6952 // defense response // inferred from electronic annotation /// 7398 // ectoderm development // inferred from electronic annotation /// 7399 // nervous system development // inferred from genetic interaction /// 7399 // nervous system development // non-traceable author statement /// 7456 // eye development (sensu Endopterygota) // inferred from genetic interaction /// 7456 // eye development…	5576 // extracellular region // non-traceable author statement /// 5577 // fibrinogen complex // inferred from sequence or structural similarity /// 5577 // fibrinogen complex // inferred from sequence similarity	IPR002181 // Fibrinogen, beta/gamma chain, C-terminal globular // 9.2E-51
4677	145876_at	-0.603147	1.45531	-6.13755	7.82573e-07	1.14311e-05	5.65894	FBgn0031786	CG13989	CG13989	CG13989	33869	---	---	---	---
6464	147663_at	-0.526297	0.117428	-6.13769	7.82251e-07	1.14311e-05	5.65934	FBgn0034707	CG5465	MED16	Mediator complex subunit 16	37535	3712 // transcription cofactor activity // non-traceable author statement /// 16455 // RNA polymerase II transcription mediator activity // inferred from sequence or structural similarity /// 4872 // receptor activity // inferred from electronic annotation /// 16455 // RNA polymerase II transcription mediator activity // inferred from sequence similarity	6366 // transcription from RNA polymerase II promoter // inferred from sequence or structural similarity /// 6367 // transcription initiation from RNA polymerase II promoter // inferred from sequence or structural similarity /// 6366 // transcription from RNA polymerase II promoter // inferred from sequence similarity /// 6367 // transcription initiation from RNA polymerase II promoter // inferre…	119 // mediator complex // inferred from sequence or structural similarity /// 5634 // nucleus // inferred from sequence or structural similarity /// 119 // mediator complex // inferred from sequence similarity /// 5634 // nucleus // inferred from sequence similarity	---
7915	149114_at	-1.9771	2.88131	-6.13687	7.84105e-07	1.14311e-05	5.65701	FBgn0036969	CG6663	CG6663	CG6663	40235	4867 // serine-type endopeptidase inhibitor activity // inferred from sequence or structural similarity /// 4867 // serine-type endopeptidase inhibitor activity // inferred from sequence similarity	---	---	IPR000215 // Serpin // 1.1E-15
3013	144212_at	-0.807078	2.55363	-6.13378	7.91045e-07	1.15203e-05	5.6483	FBgn0028419	CG9159	Kr-h2	Kruppel homolog 2	33859	5515 // protein binding // inferred from physical interaction	---	16021 // integral to membrane // non-traceable author statement /// 16020 // membrane // inferred from electronic annotation /// 16021 // integral to membrane // inferred from electronic annotation	IPR005344 // Protein of unknown function UPF0121 // 1.0E-126
3665	144864_at	-0.360858	0.0471586	-6.12713	8.06242e-07	1.16915e-05	5.62951	FBgn0030288	CG11757	CG11757	CG11757	32072	8415 // acyltransferase activity // inferred from electronic annotation	8152 // metabolism // inferred from electronic annotation	---	IPR002123 // Phospholipid/glycerol acyltransferase // 9.3E-7 /// IPR002123 // Phospholipid/glycerol acyltransferase // 9.3E-7
4546	145745_at	-0.517711	2.08328	-6.12681	8.06973e-07	1.16915e-05	5.62862	FBgn0031581	CG10039	CG10039	CG10039	33617	---	---	---	---
4444	145643_at	-0.538769	3.64948	-6.12174	8.18783e-07	1.18259e-05	5.61427	FBgn0051948	CG31948	CG31948	CG31948	326178	3824 // catalytic activity // inferred from electronic annotation	6629 // lipid metabolism // inferred from electronic annotation	---	IPR000626 // Ubiquitin // 0.015
8691	149890_at	-0.43291	1.10545	-6.12116	8.20142e-07	1.18334e-05	5.61263	FBgn0038223	CG8538	CG8538	CG8538	41744	---	---	---	---
5739	146938_at	-0.597762	0.335297	-6.1203	8.22156e-07	1.18502e-05	5.61021	FBgn0033510	CG12904	CG12904	CG12904	36090	5267 // potassium channel activity // inferred from sequence or structural similarity /// 15269 // calcium-activated potassium channel activity // inferred from electronic annotation /// 5267 // potassium channel activity // inferred from sequence similarity	6811 // ion transport // inferred from electronic annotation /// 6813 // potassium ion transport // inferred from electronic annotation	16020 // membrane // inferred from electronic annotation	IPR003929 // Calcium-activated BK potassium channel, alpha subunit // 5.6E-8
11009	152208_at	-0.497075	1.71565	-6.11507	8.34538e-07	1.19949e-05	5.59545	FBgn0010470	CG9847	Fkbp13	Fkbp13	37449	3755 // peptidyl-prolyl cis-trans isomerase activity // inferred from sequence or structural similarity /// 5509 // calcium ion binding // inferred from electronic annotation /// 5528 // FK506 binding // inferred from sequence or structural similarity /// 3755 // peptidyl-prolyl cis-trans isomerase activity // inferred from electronic annotation /// 16853 // isomerase activity // inferred from el…	6457 // protein folding // inferred from electronic annotation	5783 // endoplasmic reticulum // inferred from electronic annotation	IPR002048 // Calcium-binding EF-hand // 0.033 /// IPR002048 // Calcium-binding EF-hand // 2.0E-4 /// IPR001179 // Peptidylprolyl isomerase, FKBP-type // 1.3E-55 /// IPR002048 // Calcium-binding EF-hand // 0.033 /// IPR002048 // Calcium-binding EF-hand // 2.0E-4 /// IPR001179 // Peptidylprolyl isomerase, FKBP-type // 1.3E-55
3288	144487_at	-0.385566	0.0654671	-6.11328	8.38837e-07	1.20411e-05	5.59038	FBgn0029720	CG3009	CG3009	CG3009	31402	4623 // phospholipase A2 activity // inferred from sequence or structural similarity /// 5509 // calcium ion binding // inferred from electronic annotation /// 4623 // phospholipase A2 activity // inferred from electronic annotation /// 4623 // phospholipase A2 activity // inferred from sequence similarity	6644 // phospholipid metabolism // inferred from electronic annotation /// 16042 // lipid catabolism // inferred from electronic annotation	5576 // extracellular region // inferred from electronic annotation	IPR008774 // A2 Phospholipase // 1.2E-70
4426	145625_f_at	-0.579679	1.93457	-6.11072	8.44991e-07	1.20923e-05	5.58316	FBgn0031399	CG7074	mio	missing oocyte	33399	51082 // unfolded protein binding // inferred from sequence or structural similarity /// 51082 // unfolded protein binding // inferred from sequence similarity	6457 // protein folding // inferred from sequence or structural similarity /// 16350 // maintenance of oocyte identity (sensu Insecta) // inferred from mutant phenotype /// 30716 // oocyte fate determination // inferred from mutant phenotype /// 40020 // regulation of meiosis // inferred from mutant phenotype /// 6457 // protein folding // inferred from sequence similarity	---	---
9613	150812_at	-0.606242	-0.219693	-6.11104	8.44227e-07	1.20923e-05	5.58405	FBgn0039648	CG14515	CG14515	CG14515	43454	---	---	---	IPR002861 // Reeler region // 1.7E-9
7683	148882_at	-0.532025	1.6616	-6.11024	8.46149e-07	1.20965e-05	5.58181	FBgn0036608	CG13040	CG13040	CG13040	39804	---	---	---	IPR007614 // Retinin-like protein // 1.3E-25 /// IPR007614 // Retinin-like protein // 4.2E-9
4575	145774_at	-0.427877	1.06591	-6.09835	8.75454e-07	1.24645e-05	5.54819	FBgn0031623	CG15632	Taf12L	TBP-associated factor 30kD subunit 2	33672	16251 // general RNA polymerase II transcription factor activity // inferred from sequence or structural similarity /// 16251 // general RNA polymerase II transcription factor activity // inferred from sequence similarity	6367 // transcription initiation from RNA polymerase II promoter // inferred from sequence or structural similarity /// 7140 // male meiosis // non-traceable author statement /// 7283 // spermatogenesis // non-traceable author statement /// 6352 // transcription initiation // inferred from electronic annotation /// 6367 // transcription initiation from RNA polymerase II promoter // inferred from …	5669 // transcription factor TFIID complex // inferred from sequence or structural similarity /// 5669 // transcription factor TFIID complex // inferred from electronic annotation /// 5669 // transcription factor TFIID complex // inferred from sequence similarity	IPR003228 // Transcription initiation factor TFIID // 1.9E-41
4443	145642_at	-0.411416	0.158744	-6.09398	8.86456e-07	1.25956e-05	5.53586	FBgn0031426	CG18641	CG18641	CG18641	33429	16298 // lipase activity // inferred from sequence or structural similarity /// 16298 // lipase activity // inferred from sequence similarity	6629 // lipid metabolism // inferred from electronic annotation	---	IPR000734 // Lipase // 9.0E-32
4766	145965_at	-0.461634	1.6561	-6.08664	9.05291e-07	1.28242e-05	5.5151	FBgn0083141	CG6717	Spn7	Serine protease inhibitor 7	---	4867 // serine-type endopeptidase inhibitor activity // inferred from electronic annotation	---	---	IPR000215 // Serpin // 3.5E-85 /// IPR000215 // Serpin // 8.2E-84
5420	146619_i_at	-0.669703	2.99798	-6.0853	9.08769e-07	1.28605e-05	5.51131	FBgn0025814	CG1742	Mgstl	Microsomal glutathione S-transferase-like	44110	4364 // glutathione transferase activity // inferred from sequence or structural similarity /// 16740 // transferase activity // inferred from electronic annotation /// 4364 // glutathione transferase activity // inferred from sequence similarity	6464 // protein modification // inferred from electronic annotation /// 6952 // defense response // inferred from electronic annotation /// 9636 // response to toxin // inferred from electronic annotation	5741 // mitochondrial outer membrane // inferred from sequence or structural similarity /// 5792 // microsome // inferred from sequence or structural similarity /// 5741 // mitochondrial outer membrane // inferred from sequence similarity /// 5792 // microsome // inferred from sequence similarity	IPR001129 // Membrane-associated proteins in eicosanoid and glutathione metabolism (MAPEG) // 1.3E-66
2532	143731_at	-0.558172	-0.170136	-6.08457	9.10652e-07	1.28741e-05	5.50927	FBgn0013973	CG1470	Gyc100B	Guanylyl cyclase subunit at 100B	43682	4383 // guanylate cyclase activity // inferred from direct assay /// 4383 // guanylate cyclase activity // non-traceable author statement /// 4383 // guanylate cyclase activity // inferred from electronic annotation /// 16849 // phosphorus-oxygen lyase activity // inferred from electronic annotation /// 20037 // heme binding // inferred from electronic annotation	6182 // cGMP biosynthesis // traceable author statement /// 7263 // nitric oxide mediated signal transduction // inferred from electronic annotation /// 19725 // cell homeostasis // inferred from electronic annotation /// 6182 // cGMP biosynthesis // inferred from electronic annotation /// 7242 // intracellular signaling cascade // inferred from electronic annotation /// 9190 // cyclic nucleotide…	8074 // guanylate cyclase complex, soluble // inferred from direct assay	IPR001054 // Guanylate cyclase // 4.5E-82
8671	149870_at	-0.902527	0.231329	-6.08382	9.12622e-07	1.28889e-05	5.50713	FBgn0038197	CG3143	foxo	forkhead box, sub-group O	41709	3700 // transcription factor activity // inferred from sequence or structural similarity /// 3677 // DNA binding // inferred from electronic annotation /// 3700 // transcription factor activity // inferred from electronic annotation /// 43565 // sequence-specific DNA binding // inferred from electronic annotation /// 3700 // transcription factor activity // inferred from sequence similarity	74 // regulation of progression through cell cycle // inferred from electronic annotation /// 1558 // regulation of cell growth // inferred from mutant phenotype /// 6355 // regulation of transcription, DNA-dependent // inferred from electronic annotation /// 6917 // induction of apoptosis // inferred from electronic annotation /// 6950 // response to stress // inferred from mutant phenotype /// …	5634 // nucleus // inferred from sequence or structural similarity /// 5634 // nucleus // inferred from electronic annotation /// 5634 // nucleus // inferred from sequence similarity	IPR001766 // Fork head transcription factor // 5.0E-11 /// IPR001766 // Fork head transcription factor // 1.5E-22
9108	150307_at	-0.454411	-0.167564	-6.07671	9.31375e-07	1.3101e-05	5.48705	FBgn0038874	CG5911	ETHR	ETHR	42523	8188 // neuropeptide receptor activity // inferred from sequence or structural similarity /// 8227 // amine receptor activity // inferred from sequence or structural similarity /// 8528 // peptide receptor activity, G-protein coupled // inferred from sequence or structural similarity /// 8528 // peptide receptor activity, G-protein coupled // non-traceable author statement /// 42654 // ecdysis-tr…	7186 // G-protein coupled receptor protein signaling pathway // inferred from sequence or structural similarity /// 7186 // G-protein coupled receptor protein signaling pathway // non-traceable author statement /// 7165 // signal transduction // inferred from electronic annotation /// 7186 // G-protein coupled receptor protein signaling pathway // inferred from electronic annotation /// 7186 // G…	16021 // integral to membrane // inferred from sequence or structural similarity /// 16020 // membrane // inferred from electronic annotation /// 16021 // integral to membrane // inferred from electronic annotation /// 16021 // integral to membrane // inferred from sequence similarity	IPR000276 // Rhodopsin-like GPCR superfamily // 8.5E-65
576	141775_at	-0.38188	0.3773	-6.06758	9.56059e-07	1.3381e-05	5.46123	FBgn0000487	CG2952	Dox-A3	Diphenol oxidase A3	44513	4503 // monophenol monooxygenase activity // inferred from sequence or structural similarity /// 4503 // monophenol monooxygenase activity // non-traceable author statement /// 4503 // monophenol monooxygenase activity // traceable author statement /// 5344 // oxygen transporter activity // inferred from electronic annotation /// 4497 // monooxygenase activity // inferred from electronic annotati…	6810 // transport // inferred from electronic annotation /// 6952 // defense response // non-traceable author statement /// 8152 // metabolism // inferred from electronic annotation /// 6583 // melanin biosynthesis from tyrosine // inferred from sequence or structural similarity /// 6952 // defense response // inferred from sequence or structural similarity /// 6583 // melanin biosynthesis from t…	5576 // extracellular region // inferred from direct assay	IPR000896 // Arthropod hemocyanin/insect LSP // 5.2E-80 /// IPR005204 // Hemocyanin, N-terminal // 6.4E-7 /// IPR005203 // Hemocyanin, C-terminal // 7.8E-71
5659	146858_at	-0.291293	-0.401635	-6.06534	9.62197e-07	1.34401e-05	5.45491	FBgn0033365	CG8170	CG8170	CG8170	35908	4252 // serine-type endopeptidase activity // inferred from sequence or structural similarity /// 4263 // chymotrypsin activity // inferred from electronic annotation /// 4295 // trypsin activity // non-traceable author statement /// 4252 // serine-type endopeptidase activity // inferred from electronic annotation /// 8233 // peptidase activity // inferred from electronic annotation /// 16787 // …	6508 // proteolysis // non-traceable author statement /// 6952 // defense response // inferred from electronic annotation /// 6508 // proteolysis // inferred from electronic annotation	---	IPR001254 // Peptidase S1, chymotrypsin // 2.3E-75
9112	150311_at	-0.552884	1.07263	-6.05119	1.002e-06	1.39543e-05	5.41489	---	---	---	---	---	3682 // chromatin binding // inferred from mutant phenotype /// 3702 // RNA polymerase II transcription factor activity // non-traceable author statement /// 5515 // protein binding // inferred from physical interaction /// 8195 // phosphatidate phosphatase activity // inferred from sequence or structural similarity /// 5515 // protein binding // inferred from electronic annotation	1672 // regulation of chromatin assembly or disassembly // inferred from mutant phenotype /// 6325 // establishment and/or maintenance of chromatin architecture // non-traceable author statement /// 6333 // chromatin assembly or disassembly // inferred from electronic annotation /// 6357 // regulation of transcription from RNA polymerase II promoter // inferred from electronic annotation /// 6917…	785 // chromatin // inferred from mutant phenotype /// 5634 // nucleus // inferred from direct assay /// 5634 // nucleus // non-traceable author statement /// 5700 // polytene chromosome // inferred from direct assay /// 5886 // plasma membrane // inferred from sequence or structural similarity /// 5634 // nucleus // inferred from electronic annotation	IPR007588 // FLYWCH Zn-finger // 2.9E-7
5786	146985_at	-0.405868	0.314203	-6.04875	1.00905e-06	1.40147e-05	5.40797	FBgn0033587	CG13218	CG13218	CG13218	36177	---	---	---	---
8914	150113_at	-0.532873	1.96845	-6.04865	1.00934e-06	1.40147e-05	5.40768	FBgn0038565	CG7794	CG7794	CG7794	42159	3924 // GTPase activity // inferred from electronic annotation /// 5200 // structural constituent of cytoskeleton // inferred from sequence or structural similarity /// 5525 // GTP binding // inferred from electronic annotation /// 15631 // tubulin binding // inferred from electronic annotation /// 166 // nucleotide binding // inferred from electronic annotation /// 5198 // structural molecule ac…	6886 // intracellular protein transport // inferred from electronic annotation /// 6928 // cell motility // inferred from electronic annotation /// 7010 // cytoskeleton organization and biogenesis // inferred from electronic annotation /// 7018 // microtubule-based movement // inferred from electronic annotation /// 7059 // chromosome segregation // inferred from electronic annotation /// 7067 //…	5874 // microtubule // inferred from sequence or structural similarity /// 45298 // tubulin // inferred from electronic annotation /// 5874 // microtubule // inferred from electronic annotation /// 43234 // protein complex // inferred from electronic annotation /// 5874 // microtubule // inferred from sequence similarity	IPR003008 // Tubulin/FtsZ, GTPase // 2.4E-75 /// IPR008280 // Tubulin/FtsZ, C-terminal // 1.0E-57
6825	148024_at	-0.415973	0.225581	-6.0394	1.03643e-06	1.43483e-05	5.38154	FBgn0052311	CG33484	zormin	zormin	2769001	5200 // structural constituent of cytoskeleton // inferred from sequence or structural similarity /// 5200 // structural constituent of cytoskeleton // inferred from sequence similarity	6936 // muscle contraction // inferred from electronic annotation	16020 // membrane // inferred from electronic annotation	IPR002017 // Spectrin repeat // 0.02 /// IPR002017 // Spectrin repeat // 2.1E-4 /// IPR007110 // Immunoglobulin-like // 1.1E-7 /// IPR007110 // Immunoglobulin-like // 5.7E-9 /// IPR007110 // Immunoglobulin-like // 5.0E-4 /// IPR007110 // Immunoglobulin-like // 0.11 /// IPR007110 // Immunoglobulin-like // 0.68 /// IPR007110 // Immunoglobulin-like // 3.4E-5 /// IPR007110 // Immunoglobulin-like // 2…
11189	152388_at	-0.359339	0.256966	-6.0383	1.03971e-06	1.43794e-05	5.37842	FBgn0024191	CG7238	sip1	septin interacting protein 1	44238	3676 // nucleic acid binding // inferred from electronic annotation /// 5515 // protein binding // inferred from physical interaction	1501 // skeletal development // inferred from electronic annotation /// 7498 // mesoderm development // inferred from electronic annotation	5578 // extracellular matrix (sensu Metazoa) // inferred from sequence or structural similarity /// 5622 // intracellular // inferred from electronic annotation /// 5578 // extracellular matrix (sensu Metazoa) // inferred from sequence similarity	IPR000467 // D111/G-patch domain // 6.3E-19
7975	149174_at	-0.768833	-0.0577712	-6.0365	1.04509e-06	1.44395e-05	5.37333	FBgn0052436	CG32436	CG32436	CG32436	40362	---	---	---	---
2314	143513_at	-0.590029	0.630211	-6.03049	1.06324e-06	1.46615e-05	5.35633	FBgn0004781	CG1327	Ccp84Ac	Ccp84Ac	40823	8010 // structural constituent of larval cuticle (sensu Insecta) // inferred from sequence or structural similarity /// 8010 // structural constituent of larval cuticle (sensu Insecta) // inferred from sequence similarity	---	---	IPR000618 // Insect cuticle protein // 1.2E-28
1384	142583_at	-0.664966	2.86597	-6.02951	1.06624e-06	1.46883e-05	5.35355	FBgn0034497	CG9090	CG9090	CG9090	37297	5386 // carrier activity // inferred from sequence or structural similarity /// 5488 // binding // inferred from electronic annotation /// 15114 // phosphate transporter activity // inferred from sequence or structural similarity /// 5515 // protein binding // inferred from physical interaction /// 5386 // carrier activity // inferred from sequence similarity /// 15114 // phosphate transporter ac…	6796 // phosphate metabolism // inferred from electronic annotation /// 6817 // phosphate transport // inferred from sequence or structural similarity /// 6810 // transport // inferred from electronic annotation /// 6817 // phosphate transport // inferred from sequence similarity	5740 // mitochondrial envelope // inferred from sequence or structural similarity /// 5743 // mitochondrial inner membrane // inferred from electronic annotation /// 16020 // membrane // inferred from electronic annotation /// 16021 // integral to membrane // inferred from electronic annotation /// 5740 // mitochondrial envelope // inferred from sequence similarity	IPR001993 // Mitochondrial substrate carrier // 4.1E-28 /// IPR001993 // Mitochondrial substrate carrier // 1.4E-24 /// IPR001993 // Mitochondrial substrate carrier // 1.3E-10
13582	154781_at	-0.467354	1.57245	-6.02854	1.06919e-06	1.47001e-05	5.35082	FBgn0043792	CG30427	CG30427	CG30427	37986	16491 // oxidoreductase activity // inferred from electronic annotation	---	---	IPR004262 // Male sterility protein // 5.6E-100
1861	143060_f_at	-0.872462	3.09578	-6.02774	1.07166e-06	1.47196e-05	5.34854	FBgn0000045	CG7478	Act79B	Actin 79B	40444	3774 // motor activity // inferred from electronic annotation /// 5200 // structural constituent of cytoskeleton // inferred from sequence or structural similarity /// 166 // nucleotide binding // inferred from electronic annotation /// 5198 // structural molecule activity // inferred from electronic annotation /// 5200 // structural constituent of cytoskeleton // inferred from electronic annotat…	7010 // cytoskeleton organization and biogenesis // inferred from sequence or structural similarity /// 7010 // cytoskeleton organization and biogenesis // inferred from sequence similarity	5884 // actin filament // inferred from sequence or structural similarity /// 5884 // actin filament // non-traceable author statement /// 5856 // cytoskeleton // inferred from electronic annotation /// 5884 // actin filament // inferred from electronic annotation /// 5884 // actin filament // inferred from sequence similarity	IPR004000 // Actin/actin-like // 1.0E-126
5627	146826_at	-0.584017	0.190411	-6.02644	1.07564e-06	1.47459e-05	5.34489	FBgn0001285	CG8579	Jon44E	Jonah 44E	35853	4263 // chymotrypsin activity // inferred from sequence or structural similarity /// 4263 // chymotrypsin activity // non-traceable author statement /// 4295 // trypsin activity // inferred from electronic annotation /// 4252 // serine-type endopeptidase activity // inferred from electronic annotation /// 8233 // peptidase activity // inferred from electronic annotation /// 16787 // hydrolase act…	6508 // proteolysis // non-traceable author statement /// 6508 // proteolysis // inferred from electronic annotation	---	IPR001254 // Peptidase S1, chymotrypsin // 2.0E-64
10004	151203_at	-0.359112	-0.437477	-6.02643	1.07568e-06	1.47459e-05	5.34485	FBgn0040726	CG13439	dpr	defective proboscis extension response	2768858	---	35199 // salt aversion // inferred from mutant phenotype /// 35199 // salt aversion // non-traceable author statement /// 50914 // sensory perception of salty taste // inferred from mutant phenotype	---	IPR007110 // Immunoglobulin-like // 3.5E-5 /// IPR007110 // Immunoglobulin-like // 9.3E-7
4594	145793_at	-0.436572	1.10758	-6.02577	1.07771e-06	1.47581e-05	5.34299	FBgn0031649	CG15624	hoe2	hoepel2	33700	5302 // L-tyrosine transporter activity // non-traceable author statement /// 8324 // cation transporter activity // inferred from electronic annotation /// 15137 // citrate transporter activity // inferred from electronic annotation /// 15105 // arsenite transporter activity // inferred from electronic annotation	6812 // cation transport // inferred from electronic annotation /// 6820 // anion transport // inferred from electronic annotation /// 15746 // citrate transport // inferred from electronic annotation	16020 // membrane // non-traceable author statement /// 16021 // integral to membrane // inferred from electronic annotation	---
1989	143188_at	-0.467825	-0.0947804	-6.02232	1.08842e-06	1.48191e-05	5.33322	FBgn0001180	CG9786	hb	hunchback	41032	3677 // DNA binding // inferred from direct assay /// 3704 // specific RNA polymerase II transcription factor activity // non-traceable author statement /// 8270 // zinc ion binding // inferred from electronic annotation /// 16563 // transcriptional activator activity // inferred from direct assay /// 3676 // nucleic acid binding // inferred from electronic annotation	1763 // morphogenesis of a branching structure // traceable author statement /// 6357 // regulation of transcription from RNA polymerase II promoter // inferred from electronic annotation /// 7354 // zygotic determination of anterior/posterior axis, embryo // non-traceable author statement /// 7354 // zygotic determination of anterior/posterior axis, embryo // traceable author statement /// 7355 …	5634 // nucleus // non-traceable author statement /// 5634 // nucleus // inferred from electronic annotation	---
6840	148039_at	-0.595561	1.04496	-6.01782	1.10256e-06	1.4931e-05	5.32049	FBgn0035332	CG13801	CG13801	CG13801	38299	5215 // transporter activity // inferred from electronic annotation /// 8324 // cation transporter activity // inferred from electronic annotation /// 15137 // citrate transporter activity // inferred from electronic annotation	6810 // transport // inferred from electronic annotation /// 6811 // ion transport // inferred from electronic annotation /// 6812 // cation transport // inferred from electronic annotation /// 6820 // anion transport // inferred from electronic annotation /// 15746 // citrate transport // inferred from electronic annotation	16021 // integral to membrane // inferred from electronic annotation	---
7162	148361_at	-0.427099	0.2203	-6.01855	1.10026e-06	1.4931e-05	5.32255	FBgn0052369	CG32369	CG32369	CG32369	38873	4176 // ATP-dependent peptidase activity // inferred from electronic annotation /// 4553 // hydrolase activity, hydrolyzing O-glycosyl compounds // inferred from electronic annotation /// 4842 // ubiquitin-protein ligase activity // inferred from electronic annotation /// 8270 // zinc ion binding // inferred from electronic annotation /// 5488 // binding // inferred from electronic annotation ///…	5975 // carbohydrate metabolism // inferred from electronic annotation /// 6510 // ATP-dependent proteolysis // inferred from electronic annotation /// 16567 // protein ubiquitination // inferred from electronic annotation	151 // ubiquitin ligase complex // inferred from electronic annotation	IPR003111 // Peptidase S16, lon N-terminal // 1.0E-8 /// IPR001841 // Zn-finger, RING // 2.6E-9
13767	154966_at	-0.356917	1.02056	-6.01791	1.10229e-06	1.4931e-05	5.32073	FBgn0053139	CG33139	Ranbp11	Ranbp11	36732	8536 // Ran GTPase binding // non-traceable author statement /// 8565 // protein transporter activity // inferred from electronic annotation /// 5488 // binding // inferred from electronic annotation	59 // protein import into nucleus, docking // inferred from electronic annotation	5634 // nucleus // inferred from electronic annotation /// 5643 // nuclear pore // inferred from electronic annotation /// 5737 // cytoplasm // inferred from electronic annotation	IPR001494 // Importin-beta, N-terminal // 1.9E-23
6327	147526_at	-0.409002	0.441298	-6.01637	1.10716e-06	1.49724e-05	5.31637	FBgn0034481	CG11041	CG11041	CG11041	37278	5509 // calcium ion binding // inferred from sequence or structural similarity /// 5509 // calcium ion binding // inferred from sequence similarity	---	---	IPR002048 // Calcium-binding EF-hand // 0.042 /// IPR002048 // Calcium-binding EF-hand // 0.0086
8013	149212_at	-0.423938	-0.0523569	-6.01437	1.11353e-06	1.5044e-05	5.31071	FBgn0037130	CG7152	Syn1	Syntrophin-like 1	40424	5200 // structural constituent of cytoskeleton // inferred from electronic annotation /// 5215 // transporter activity // inferred from electronic annotation /// 8092 // cytoskeletal protein binding // inferred from sequence or structural similarity /// 8307 // structural constituent of muscle // inferred from sequence or structural similarity /// 5515 // protein binding // inferred from electron…	6810 // transport // inferred from electronic annotation /// 6936 // muscle contraction // inferred from electronic annotation /// 7165 // signal transduction // inferred from electronic annotation /// 7268 // synaptic transmission // inferred from electronic annotation	16013 // syntrophin complex // inferred from sequence or structural similarity /// 16013 // syntrophin complex // non-traceable author statement /// 16013 // syntrophin complex // inferred from sequence similarity	IPR001478 // PDZ/DHR/GLGF domain // 3.8E-19
4580	145779_at	-0.680964	1.92457	-6.01182	1.1217e-06	1.51251e-05	5.3035	FBgn0031629	CG3244	CG3244	CG3244	33678	5529 // sugar binding // inferred from electronic annotation	---	---	---
12298	153497_at	-0.367759	2.09115	-6.01052	1.12587e-06	1.51668e-05	5.29983	FBgn0035105	CG7042	CG7042	CG7042	38025	4730 // pseudouridylate synthase activity // inferred from electronic annotation /// 8138 // protein tyrosine/serine/threonine phosphatase activity // inferred from sequence or structural similarity /// 4721 // phosphoprotein phosphatase activity // inferred from electronic annotation /// 8138 // protein tyrosine/serine/threonine phosphatase activity // inferred from electronic annotation /// 163…	6464 // protein modification // inferred from electronic annotation /// 6470 // protein amino acid dephosphorylation // inferred from sequence or structural similarity /// 7242 // intracellular signaling cascade // inferred from electronic annotation /// 8033 // tRNA processing // inferred from electronic annotation /// 6470 // protein amino acid dephosphorylation // inferred from electronic anno…	---	IPR001406 // tRNA pseudouridine synthase // 4.0E-10 /// IPR000340 // Dual specificity protein phosphatase // 8.5E-33 /// IPR000340 // Dual specificity protein phosphatase // 8.5E-33
7623	148822_at	-0.45143	0.876956	-6.00583	1.14111e-06	1.53278e-05	5.28657	FBgn0041160	CG7554	comm2	comm2	39716	---	---	---	---
3879	145078_at	-0.527637	0.900038	-6.00114	1.15657e-06	1.5491e-05	5.27328	FBgn0030582	CG14411	CG14411	CG14411	32408	4721 // phosphoprotein phosphatase activity // inferred from electronic annotation /// 16791 // phosphoric monoester hydrolase activity // inferred from electronic annotation	19538 // protein metabolism // inferred from electronic annotation	---	---
10674	151873_at	-0.347668	1.67865	-5.99847	1.16547e-06	1.55953e-05	5.26571	FBgn0034649	CG9865	CG9865	CG9865	37470	---	---	---	IPR007704 // Mannosyltransferase, DXD // 1.0E-126
1249	142448_at	-0.439923	0.575987	-5.99768	1.16812e-06	1.56158e-05	5.26348	FBgn0038679	CG6040	CG6040	CG6040	42292	---	---	---	---
4800	145999_at	-0.758306	0.498805	-5.99562	1.17502e-06	1.5693e-05	5.25766	FBgn0031969	CG7228	CG7228	CG7228	34087	5044 // scavenger receptor activity // non-traceable author statement /// 5515 // protein binding // inferred from physical interaction	6915 // apoptosis // inferred from electronic annotation /// 6952 // defense response // non-traceable author statement /// 7155 // cell adhesion // inferred from electronic annotation /// 42116 // macrophage activation // inferred from electronic annotation	5887 // integral to plasma membrane // non-traceable author statement /// 16020 // membrane // inferred from electronic annotation	IPR002159 // CD36 antigen // 7.9E-86
2518	143717_at	-0.342892	0.123236	-5.99417	1.17992e-06	1.57434e-05	5.25356	FBgn0013751	CG1072	Awh	Arrowhead	38451	3700 // transcription factor activity // inferred from sequence or structural similarity /// 5506 // iron ion binding // inferred from electronic annotation /// 5515 // protein binding // inferred from sequence or structural similarity /// 8270 // zinc ion binding // inferred from electronic annotation /// 3677 // DNA binding // inferred from electronic annotation /// 3700 // transcription factor…	6118 // electron transport // inferred from electronic annotation /// 6355 // regulation of transcription, DNA-dependent // inferred from sequence or structural similarity /// 6357 // regulation of transcription from RNA polymerase II promoter // inferred from electronic annotation /// 7398 // ectoderm development // inferred from electronic annotation /// 7399 // nervous system development // in…	5634 // nucleus // inferred from sequence or structural similarity /// 5634 // nucleus // inferred from electronic annotation /// 5634 // nucleus // inferred from sequence similarity	IPR001356 // Homeobox // 1.5E-23 /// IPR001781 // Zn-binding protein, LIM // 9.8E-20 /// IPR001781 // Zn-binding protein, LIM // 1.4E-19 /// IPR001356 // Homeobox // 1.4E-22 /// IPR001781 // Zn-binding protein, LIM // 1.5E-16
7968	149167_at	-0.354439	0.137759	-5.99246	1.18573e-06	1.57909e-05	5.24871	FBgn0037053	CG12976	CG12976	CG12976	40335	---	---	---	---
5511	146710_at	-0.440129	1.92361	-5.98412	1.21443e-06	1.60966e-05	5.2251	FBgn0033127	CG12845	Tsp42Ef	Tetraspanin 42Ef	35615	---	---	16021 // integral to membrane // inferred from sequence or structural similarity /// 16021 // integral to membrane // inferred from electronic annotation /// 16021 // integral to membrane // inferred from sequence similarity	IPR000301 // CD9/CD37/CD63 antigen // 1.7E-28
3652	144851_at	-0.635154	1.35975	-5.98371	1.21584e-06	1.61002e-05	5.22395	FBgn0030270	CG15199	CG15199	CG15199	32051	---	---	---	---
6586	147785_at	-0.343587	0.265507	-5.98193	1.22209e-06	1.61676e-05	5.21889	FBgn0034870	CG13559	CG13559	CG13559	37720	---	---	---	---
2115	143314_at	-0.515758	2.22067	-5.98116	1.22476e-06	1.61877e-05	5.21674	FBgn0003151	CG4904	Pros35	Proteasome 35kD subunit	34359	4175 // endopeptidase activity // inferred from sequence or structural similarity /// 4175 // endopeptidase activity // non-traceable author statement /// 5515 // protein binding // inferred from physical interaction /// 4175 // endopeptidase activity // inferred from electronic annotation /// 4298 // threonine endopeptidase activity // inferred from electronic annotation /// 8233 // peptidase ac…	6510 // ATP-dependent proteolysis // non-traceable author statement /// 6511 // ubiquitin-dependent protein catabolism // non-traceable author statement /// 6511 // ubiquitin-dependent protein catabolism // inferred from electronic annotation	502 // proteasome complex (sensu Eukaryota) // non-traceable author statement /// 5839 // proteasome core complex (sensu Eukaryota) // inferred from sequence or structural similarity /// 5829 // cytosol // inferred from electronic annotation /// 5839 // proteasome core complex (sensu Eukaryota) // inferred from electronic annotation /// 43234 // protein complex // inferred from electronic annotat…	IPR001353 // Peptidase T1, 20S proteasome // 3.3E-64
9495	150694_at	-0.445923	0.455223	-5.97804	1.23578e-06	1.63179e-05	5.2079	FBgn0039465	CG6323	Tsp97E	Tetraspanin 97E	43241	4872 // receptor activity // inferred from electronic annotation	---	16021 // integral to membrane // inferred from sequence or structural similarity /// 16021 // integral to membrane // inferred from electronic annotation /// 16021 // integral to membrane // inferred from sequence similarity	IPR000301 // CD9/CD37/CD63 antigen // 5.9E-13
3804	145003_at	-0.393004	0.13226	-5.97653	1.24116e-06	1.63407e-05	5.20362	FBgn0030477	CG15749	dmrt11E	doublesex-Mab related 11E	32291	3700 // transcription factor activity // inferred from sequence or structural similarity /// 3700 // transcription factor activity // inferred from sequence similarity	1501 // skeletal development // inferred from electronic annotation /// 6355 // regulation of transcription, DNA-dependent // inferred from electronic annotation /// 7498 // mesoderm development // inferred from electronic annotation /// 7517 // muscle development // inferred from electronic annotation /// 7548 // sex differentiation // inferred from electronic annotation	5634 // nucleus // inferred from sequence or structural similarity /// 5634 // nucleus // inferred from sequence similarity	IPR001275 // DM DNA-binding // 8.6E-19
11756	152955_at	-0.436986	0.0538024	-5.97477	1.24744e-06	1.63639e-05	5.19863	FBgn0025378	CG3795	CG3795	CG3795	31128	4252 // serine-type endopeptidase activity // inferred from sequence or structural similarity /// 4263 // chymotrypsin activity // inferred from electronic annotation /// 4295 // trypsin activity // inferred from sequence or structural similarity /// 4295 // trypsin activity // non-traceable author statement /// 5215 // transporter activity // inferred from electronic annotation /// 4252 // serin…	6508 // proteolysis // non-traceable author statement /// 6810 // transport // inferred from electronic annotation /// 6508 // proteolysis // inferred from electronic annotation	16020 // membrane // inferred from electronic annotation	IPR001254 // Peptidase S1, chymotrypsin // 7.9E-49
11508	152707_at	-0.344569	1.91169	-5.97093	1.26125e-06	1.65295e-05	5.18777	FBgn0034655	CG10307	CG10307	CG10307	37477	4672 // protein kinase activity // inferred from electronic annotation /// 4675 // transmembrane receptor protein serine/threonine kinase activity // inferred from electronic annotation /// 4872 // receptor activity // inferred from electronic annotation /// 5198 // structural molecule activity // inferred from electronic annotation /// 16301 // kinase activity // inferred from electronic annotat…	6464 // protein modification // inferred from electronic annotation /// 6468 // protein amino acid phosphorylation // inferred from electronic annotation /// 6952 // defense response // inferred from electronic annotation /// 7154 // cell communication // inferred from electronic annotation /// 7165 // signal transduction // inferred from electronic annotation /// 7166 // cell surface receptor li…	---	IPR001611 // Leucine-rich repeat // 0.068 /// IPR001611 // Leucine-rich repeat // 0.18 /// IPR001611 // Leucine-rich repeat // 1.3E-4 /// IPR001611 // Leucine-rich repeat // 0.0090 /// IPR001611 // Leucine-rich repeat // 0.025
1955	143154_at	-0.377573	0.326006	-5.96625	1.27831e-06	1.66604e-05	5.17451	FBgn0000625	CG10488	eyg	eyegone	39419	3700 // transcription factor activity // inferred from sequence or structural similarity /// 3700 // transcription factor activity // non-traceable author statement /// 3677 // DNA binding // inferred from electronic annotation /// 3700 // transcription factor activity // inferred from electronic annotation /// 43565 // sequence-specific DNA binding // inferred from electronic annotation /// 3700…	1654 // eye development // inferred from mutant phenotype /// 1745 // compound eye morphogenesis (sensu Endopterygota) // inferred from mutant phenotype /// 6357 // regulation of transcription from RNA polymerase II promoter // inferred from electronic annotation /// 7398 // ectoderm development // inferred from electronic annotation /// 7399 // nervous system development // inferred from electro…	5667 // transcription factor complex // inferred from sequence or structural similarity /// 5634 // nucleus // inferred from electronic annotation /// 5667 // transcription factor complex // inferred from sequence similarity	IPR001523 // Paired box protein, N-terminal // 3.2E-36 /// IPR001356 // Homeobox // 3.4E-32 /// IPR001523 // Paired box protein, N-terminal // 3.2E-36 /// IPR001356 // Homeobox // 3.4E-32
7111	148310_i_at	-0.635107	1.30947	-5.96623	1.27837e-06	1.66604e-05	5.17446	FBgn0035744	CG8628	CG8628	CG8628	38783	62 // acyl-CoA binding // inferred from sequence or structural similarity /// 4857 // enzyme inhibitor activity // inferred from sequence or structural similarity /// 5386 // carrier activity // inferred from electronic annotation /// 50809 // diazepam binding // inferred from sequence or structural similarity /// 166 // nucleotide binding // inferred from electronic annotation /// 5524 // ATP bi…	6869 // lipid transport // inferred from electronic annotation /// 42049 // cell acyl-CoA homeostasis // inferred from sequence or structural similarity /// 1700 // embryonic development (sensu Insecta) // inferred from mutant phenotype /// 7399 // nervous system development // inferred from mutant phenotype /// 7411 // axon guidance // inferred from mutant phenotype /// 7413 // axonal fasciculat…	---	IPR000582 // Acyl-coA-binding protein, ACBP // 3.1E-32
9922	151121_at	-0.455029	2.21282	-5.96655	1.27722e-06	1.66604e-05	5.17535	FBgn0040636	CG13255	CG13255	CG13255	50109	---	---	---	---
11259	152458_at	-0.420206	2.98868	-5.96352	1.28836e-06	1.67751e-05	5.16678	FBgn0025592	CG18374	Gyk	Glycerol kinase	43913	4370 // glycerol kinase activity // non-traceable author statement /// 16491 // oxidoreductase activity // inferred from electronic annotation /// 19200 // carbohydrate kinase activity // inferred from electronic annotation /// 4370 // glycerol kinase activity // inferred from electronic annotation /// 16301 // kinase activity // inferred from electronic annotation /// 16740 // transferase activi…	5975 // carbohydrate metabolism // inferred from electronic annotation /// 6072 // glycerol-3-phosphate metabolism // inferred from electronic annotation /// 6629 // lipid metabolism // inferred from electronic annotation /// 6810 // transport // inferred from electronic annotation	---	IPR000577 // Carbohydrate kinase, FGGY // 1.4E-78 /// IPR000577 // Carbohydrate kinase, FGGY // 3.4E-65 /// IPR000577 // Carbohydrate kinase, FGGY // 7.3E-63 /// IPR000577 // Carbohydrate kinase, FGGY // 3.4E-65
6671	147870_at	-0.544629	2.34692	-5.96116	1.29711e-06	1.68264e-05	5.1601	FBgn0035020	CG13585	CG13585	CG13585	37918	---	---	---	---
9589	150788_at	-0.445367	0.602109	-5.96149	1.29589e-06	1.68264e-05	5.16103	FBgn0053203	CG33203	CG33203	CG33203	43414	---	---	16021 // integral to membrane // inferred from electronic annotation	IPR004254 // Hly-III related proteins // 2.0E-11
13638	154837_at	-0.27341	1.27617	-5.96131	1.29655e-06	1.68264e-05	5.16053	FBgn0034275	CG5002	CG5002	CG5002	37025	5215 // transporter activity // non-traceable author statement /// 15381 // high affinity sulfate permease activity // inferred from sequence or structural similarity /// 5515 // protein binding // inferred from physical interaction /// 5215 // transporter activity // inferred from electronic annotation /// 15381 // high affinity sulfate permease activity // inferred from sequence similarity	6790 // sulfur metabolism // inferred from electronic annotation /// 6820 // anion transport // inferred from electronic annotation /// 6858 // extracellular transport // inferred from electronic annotation /// 6810 // transport // inferred from electronic annotation	16020 // membrane // inferred from electronic annotation /// 16021 // integral to membrane // inferred from electronic annotation	IPR001902 // Sulphate transporter // 2.4E-65
11178	152377_at	-0.450152	0.798687	-5.95558	1.31806e-06	1.70823e-05	5.14429	FBgn0036038	CG18176	defl	deflated	39141	---	---	---	---
5279	146478_at	-0.278724	-0.277257	-5.95224	1.33076e-06	1.72151e-05	5.13483	FBgn0002023	CG10699	Lim3	Lim3	35184	3700 // transcription factor activity // inferred from sequence or structural similarity /// 3704 // specific RNA polymerase II transcription factor activity // non-traceable author statement /// 8270 // zinc ion binding // inferred from electronic annotation /// 3677 // DNA binding // inferred from electronic annotation /// 3700 // transcription factor activity // inferred from electronic annota…	6355 // regulation of transcription, DNA-dependent // inferred from sequence or structural similarity /// 6357 // regulation of transcription from RNA polymerase II promoter // inferred from electronic annotation /// 7398 // ectoderm development // inferred from electronic annotation /// 7399 // nervous system development // traceable author statement /// 8045 // motor axon guidance // inferred f…	5634 // nucleus // inferred from sequence or structural similarity /// 5634 // nucleus // non-traceable author statement /// 5634 // nucleus // inferred from electronic annotation /// 5634 // nucleus // inferred from sequence similarity	IPR001356 // Homeobox // 3.0E-26 /// IPR001781 // Zn-binding protein, LIM // 1.9E-20 /// IPR001781 // Zn-binding protein, LIM // 2.7E-24
4502	145701_at	-0.521261	1.55716	-5.94802	1.34698e-06	1.73793e-05	5.12287	FBgn0053282	CG33282	CG33282	CG33282	2768939	15145 // monosaccharide transporter activity // inferred from sequence or structural similarity /// 15145 // monosaccharide transporter activity // inferred from sequence similarity	6810 // transport // inferred from electronic annotation /// 15749 // monosaccharide transport // inferred from sequence or structural similarity /// 15749 // monosaccharide transport // inferred from sequence similarity	16020 // membrane // inferred from electronic annotation /// 16020 // membrane // inferred from sequence or structural similarity /// 16021 // integral to membrane // inferred from electronic annotation /// 16020 // membrane // inferred from sequence similarity	IPR005828 // General substrate transporter // 7.9E-20
2049	143248_at	-0.535348	2.24623	-5.94357	1.36428e-06	1.75193e-05	5.11028	FBgn0002609 /// FBgn0082736	CG8346	HLHm3 /// DsimHLHm3	E(spl) region transcript m3 /// HLHm3	43156	3677 // DNA binding // non-traceable author statement /// 3700 // transcription factor activity // non-traceable author statement /// 3700 // transcription factor activity // traceable author statement /// 16566 // specific transcriptional repressor activity // non-traceable author statement /// 5515 // protein binding // inferred from physical interaction /// 3677 // DNA binding // inferred from…	122 // negative regulation of transcription from RNA polymerase II promoter // non-traceable author statement /// 7219 // Notch signaling pathway // non-traceable author statement /// 7398 // ectoderm development // inferred from electronic annotation /// 7399 // nervous system development // inferred from electronic annotation /// 7456 // eye development (sensu Endopterygota) // traceable author…	5634 // nucleus // non-traceable author statement /// 5634 // nucleus // inferred from electronic annotation	IPR001092 // Basic helix-loop-helix dimerization domain bHLH // 2.5E-17
9306	150505_at	-0.347586	0.194691	-5.94001	1.37828e-06	1.76667e-05	5.10021	FBgn0039193	CG13613	CG13613	CG13613	42910	---	---	---	---
5835	147034_at	-0.482733	1.54147	-5.93603	1.39414e-06	1.78343e-05	5.08892	FBgn0033649	CG13194	pyr	pyramus	36255	5104 // fibroblast growth factor receptor binding // non-traceable author statement /// 5104 // fibroblast growth factor receptor binding // traceable author statement	7442 // hindgut morphogenesis // inferred from mutant phenotype /// 7498 // mesoderm development // inferred from genetic interaction /// 7498 // mesoderm development // inferred from mutant phenotype /// 7507 // heart development // inferred from mutant phenotype /// 8543 // fibroblast growth factor receptor signaling pathway // traceable author statement	---	---
13309	154508_at	-0.645887	2.98329	-5.93357	1.40402e-06	1.79147e-05	5.08195	FBgn0026571	CG9539	Sec61	Sec61	33905	8565 // protein transporter activity // inferred from sequence or structural similarity /// 8565 // protein transporter activity // non-traceable author statement /// 15450 // protein translocase activity // inferred from electronic annotation /// 8565 // protein transporter activity // inferred from sequence similarity	6616 // SRP-dependent cotranslational protein targeting to membrane, translocation // inferred from sequence or structural similarity /// 8219 // cell death // inferred from mutant phenotype /// 9306 // protein secretion // inferred from electronic annotation /// 6605 // protein targeting // inferred from electronic annotation /// 6810 // transport // inferred from electronic annotation /// 15031…	5784 // translocon complex // inferred from sequence or structural similarity /// 16020 // membrane // inferred from electronic annotation /// 16021 // integral to membrane // inferred from electronic annotation /// 5784 // translocon complex // inferred from sequence similarity	IPR002208 // SecY protein // 1.9E-9
6208	147407_at	-0.644817	1.15405	-5.9316	1.41198e-06	1.7992e-05	5.07637	FBgn0034292	CG5767	CG5767	CG5767	37055	---	---	---	IPR007931 // Protein of unknown function DUF725 // 2.1E-74
9655	150854_at	-0.431604	-0.145387	-5.92444	1.4413e-06	1.83003e-05	5.05609	FBgn0051038	CG31038	CG31038	CG31038	43535	---	---	---	---
4670	145869_at	-0.407625	1.50813	-5.92264	1.44879e-06	1.83522e-05	5.05098	FBgn0031774	CG9147	CG9147	CG9147	33855	---	6118 // electron transport // inferred from electronic annotation /// 6810 // transport // inferred from electronic annotation	---	---
4474	145673_at	-0.385411	-0.399674	-5.92096	1.4558e-06	1.84243e-05	5.04622	FBgn0031467	CG2973	CG2973	CG2973	33480	5214 // structural constituent of cuticle (sensu Insecta) // inferred from sequence or structural similarity /// 42302 // structural constituent of cuticle // inferred from electronic annotation /// 5214 // structural constituent of cuticle (sensu Insecta) // inferred from sequence similarity	---	---	IPR000618 // Insect cuticle protein // 1.1E-29
3016	144215_at	-0.600459	1.49183	-5.92001	1.45975e-06	1.84577e-05	5.04354	FBgn0028475	CG10221	CG10221	CG10221	42806	5488 // binding // inferred from electronic annotation	---	5886 // plasma membrane // inferred from sequence or structural similarity /// 5886 // plasma membrane // inferred from sequence similarity	---
3924	145123_at	-0.355043	0.228411	-5.91805	1.46801e-06	1.85454e-05	5.03798	FBgn0030645	CG6308	CG6308	CG6308	32479	16740 // transferase activity // inferred from electronic annotation /// 16757 // transferase activity, transferring glycosyl groups // inferred from electronic annotation	5975 // carbohydrate metabolism // inferred from electronic annotation /// 5976 // polysaccharide metabolism // inferred from electronic annotation	---	---
7847	149046_at	-0.548759	1.61164	-5.91565	1.47815e-06	1.86567e-05	5.03118	FBgn0036870	CG14095	CG14095	CG14095	40112	---	---	---	---
6616	147815_at	-0.28366	0.282605	-5.91169	1.49508e-06	1.88534e-05	5.01995	FBgn0034928	CG13562	CG13562	CG13562	37797	3824 // catalytic activity // inferred from electronic annotation	6629 // lipid metabolism // inferred from electronic annotation	---	---
6049	147248_at	-0.300933	0.323732	-5.90885	1.50731e-06	1.89734e-05	5.01191	FBgn0034018	CG12958	CG12958	CG12958	36710	---	---	---	---
5871	147070_at	-0.4453	0.620204	-5.90791	1.51139e-06	1.90077e-05	5.00924	FBgn0033703	CG13170	CG13170	CG13170	36325	---	---	---	---
12545	153744_at	-0.573086	0.335724	-5.90482	1.52486e-06	1.91428e-05	5.00049	FBgn0029939	CG9650	CG9650	CG9650	31660	3676 // nucleic acid binding // inferred from electronic annotation /// 8270 // zinc ion binding // inferred from electronic annotation /// 30528 // transcription regulator activity // inferred from electronic annotation /// 46872 // metal ion binding // inferred from electronic annotation	6139 // nucleobase, nucleoside, nucleotide and nucleic acid metabolism // inferred from electronic annotation /// 6357 // regulation of transcription from RNA polymerase II promoter // inferred from electronic annotation /// 6366 // transcription from RNA polymerase II promoter // inferred from electronic annotation /// 7275 // development // inferred from electronic annotation /// 7498 // mesode…	5634 // nucleus // inferred from electronic annotation	IPR007087 // Zn-finger, C2H2 type // 4.4E-6 /// IPR007087 // Zn-finger, C2H2 type // 1.8E-5 /// IPR007087 // Zn-finger, C2H2 type // 1.9E-5 /// IPR007087 // Zn-finger, C2H2 type // 9.5E-6 /// IPR007087 // Zn-finger, C2H2 type // 4.4E-6 /// IPR007087 // Zn-finger, C2H2 type // 1.8E-5 /// IPR007087 // Zn-finger, C2H2 type // 1.9E-5 /// IPR007087 // Zn-finger, C2H2 type // 9.5E-6 /// IPR007087 // Zn…
4032	145231_at	-0.380496	0.751694	-5.90401	1.5284e-06	1.917e-05	4.9982	FBgn0016080	CG32561	xmas-1	xmas-1	44660	---	7283 // spermatogenesis // non-traceable author statement /// 9790 // embryonic development // non-traceable author statement /// 9993 // oogenesis (sensu Insecta) // non-traceable author statement	---	---
5535	146734_at	-0.505232	1.21963	-5.90171	1.53853e-06	1.92776e-05	4.99169	FBgn0033164	CG11112	CG11112	CG11112	35658	---	---	---	---
4102	145301_at	-0.364868	-0.502348	-5.90076	1.54274e-06	1.9279e-05	4.98899	FBgn0052547	CG32547	CG32547	CG32547	3346150	8188 // neuropeptide receptor activity // inferred from sequence or structural similarity /// 8188 // neuropeptide receptor activity // inferred from sequence similarity	7186 // G-protein coupled receptor protein signaling pathway // inferred from sequence or structural similarity /// 7186 // G-protein coupled receptor protein signaling pathway // inferred from sequence similarity	16021 // integral to membrane // inferred from sequence or structural similarity /// 16021 // integral to membrane // inferred from sequence similarity	IPR000276 // Rhodopsin-like GPCR superfamily // 2.9E-6
2173	143372_at	-0.284273	0.307517	-5.88963	1.59286e-06	1.97995e-05	4.95745	FBgn0003651	CG11502	svp	seven up	41491	3700 // transcription factor activity // inferred from sequence or structural similarity /// 3707 // steroid hormone receptor activity // inferred from electronic annotation /// 4872 // receptor activity // non-traceable author statement /// 4872 // receptor activity // traceable author statement /// 4879 // ligand-dependent nuclear receptor activity // inferred from sequence or structural simila…	1700 // embryonic development (sensu Insecta) // non-traceable author statement /// 6357 // regulation of transcription from RNA polymerase II promoter // inferred from electronic annotation /// 7165 // signal transduction // inferred from electronic annotation /// 7270 // nerve-nerve synaptic transmission // inferred from mutant phenotype /// 7417 // central nervous system development // non-tra…	5634 // nucleus // inferred from sequence or structural similarity /// 5634 // nucleus // non-traceable author statement /// 5737 // cytoplasm // inferred from direct assay /// 5634 // nucleus // inferred from electronic annotation /// 5634 // nucleus // inferred from sequence similarity	IPR000536 // Ligand-binding domain of nuclear hormone receptor // 2.8E-29 /// IPR001628 // Zn-finger, C4-type steroid receptor // 4.6E-55 /// IPR000536 // Ligand-binding domain of nuclear hormone receptor // 6.5E-61 /// IPR000536 // Ligand-binding domain of nuclear hormone receptor // 6.5E-61
4501	145700_at	-0.363629	0.885645	-5.88927	1.5945e-06	1.97995e-05	4.95643	FBgn0031520	CG8837	CG8837	CG8837	33545	5215 // transporter activity // inferred from electronic annotation	6810 // transport // inferred from electronic annotation	16020 // membrane // inferred from electronic annotation /// 16021 // integral to membrane // inferred from electronic annotation	IPR005828 // General substrate transporter // 3.4E-6 /// IPR005828 // General substrate transporter // 8.1E-5
7363	148562_at	-0.423687	0.916698	-5.88905	1.59555e-06	1.97995e-05	4.95579	FBgn0036142	CG7616	CG7616	CG7616	39260	4672 // protein kinase activity // non-traceable author statement /// 5215 // transporter activity // inferred from electronic annotation	6732 // coenzyme metabolism // inferred from electronic annotation /// 51189 // prosthetic group metabolism // inferred from electronic annotation	---	IPR004147 // ABC1 protein // 2.3E-57
9487	150686_at	-0.590973	1.55055	-5.87488	1.66185e-06	2.04952e-05	4.91562	FBgn0051072	CG31072	Lerp	Lerp	43223	4872 // receptor activity // inferred from sequence or structural similarity /// 5215 // transporter activity // inferred from electronic annotation /// 5515 // protein binding // inferred from physical interaction /// 4872 // receptor activity // inferred from electronic annotation /// 4872 // receptor activity // inferred from sequence similarity	6810 // transport // inferred from electronic annotation /// 6892 // post-Golgi vesicle-mediated transport // inferred from direct assay /// 7041 // lysosomal transport // inferred from direct assay	5737 // cytoplasm // Unknown /// 5764 // lysosome // inferred from electronic annotation /// 16020 // membrane // inferred from electronic annotation /// 5737 // cytoplasm // inferred from curator	---
10679	151878_at	-0.316373	2.22623	-5.87301	1.67081e-06	2.05514e-05	4.91032	FBgn0028541	CG7364	CG7364	CG7364	34778	5215 // transporter activity // inferred from sequence or structural similarity /// 5215 // transporter activity // inferred from electronic annotation /// 5215 // transporter activity // inferred from sequence similarity	6886 // intracellular protein transport // inferred from electronic annotation /// 6909 // phagocytosis // inferred from electronic annotation /// 6810 // transport // inferred from electronic annotation	5768 // endosome // inferred from sequence or structural similarity /// 16021 // integral to membrane // inferred from electronic annotation /// 5768 // endosome // inferred from sequence similarity	IPR004240 // Nonaspanin (TM9SF) // 1.0E-126
7892	149091_at	-0.27556	-0.26253	-5.86593	1.70515e-06	2.09186e-05	4.89025	FBgn0036937	CG7385	CG7385	CG7385	40198	4872 // receptor activity // inferred from electronic annotation /// 4970 // ionotropic glutamate receptor activity // inferred from electronic annotation /// 5234 // glutamate-gated ion channel activity // inferred from sequence or structural similarity /// 5216 // ion channel activity // inferred from electronic annotation /// 5234 // glutamate-gated ion channel activity // inferred from electr…	6811 // ion transport // inferred from electronic annotation	16020 // membrane // inferred from electronic annotation	IPR001320 // Ionotropic glutamate receptor // 8.3E-23
4945	146144_at	-0.341826	0.405934	-5.86304	1.71935e-06	2.1056e-05	4.88207	FBgn0032226	CG13141	CG13141	CG13141	34399	---	---	---	IPR003654 // Paired-like homeodomain protein, OAR // 3.8E-9
2265	143464_f_at	-1.25104	3.86708	-5.86107	1.72915e-06	2.11391e-05	4.87646	FBgn0004425	CG1179	LysB	Lysozyme B	38125	3796 // lysozyme activity // inferred from sequence or structural similarity /// 3796 // lysozyme activity // non-traceable author statement /// 3796 // lysozyme activity // inferred from sequence similarity	6960 // antimicrobial humoral response (sensu Protostomia) // non-traceable author statement /// 16998 // cell wall catabolism // inferred from electronic annotation	5576 // extracellular region // inferred from electronic annotation	IPR001916 // Glycoside hydrolase, family 22 // 1.3E-67
7863	149062_at	-0.333948	0.459316	-5.8612	1.7285e-06	2.11391e-05	4.87684	FBgn0036889	CG14100	CG14100	CG14100	40132	3676 // nucleic acid binding // inferred from electronic annotation /// 3729 // mRNA binding // inferred from electronic annotation /// 8168 // methyltransferase activity // inferred from electronic annotation /// 8173 // RNA methyltransferase activity // inferred from electronic annotation /// 16740 // transferase activity // inferred from electronic annotation /// 3723 // RNA binding // inferre…	6139 // nucleobase, nucleoside, nucleotide and nucleic acid metabolism // inferred from electronic annotation /// 6396 // RNA processing // inferred from electronic annotation	---	IPR001537 // tRNA/rRNA methyltransferase (SpoU) // 1.2E-9
8825	150024_at	-0.434945	0.811433	-5.86006	1.73418e-06	2.11821e-05	4.8736	FBgn0038441	CG11769	CG11769	CG11769	42009	---	---	---	---
559	141758_at	-0.536792	3.54992	-5.85293	1.77008e-06	2.15454e-05	4.85339	FBgn0035471	CG10849	Sc2	Sc2	38457	---	6464 // protein modification // inferred from electronic annotation	16021 // integral to membrane // inferred from electronic annotation	IPR001104 // 3-oxo-5-alpha-steroid 4-dehydrogenase, C-terminal // 9.6E-32
9586	150785_at	-0.301362	0.466831	-5.84786	1.79604e-06	2.17858e-05	4.83903	FBgn0024273	CG1520	WASp	WASp	43402	3779 // actin binding // inferred from sequence or structural similarity /// 5200 // structural constituent of cytoskeleton // inferred from electronic annotation /// 5515 // protein binding // inferred from physical interaction /// 3779 // actin binding // inferred from sequence similarity	6952 // defense response // inferred from electronic annotation /// 7010 // cytoskeleton organization and biogenesis // inferred from electronic annotation /// 7409 // axonogenesis // inferred from genetic interaction /// 7413 // axonal fasciculation // inferred from genetic interaction /// 7423 // sensory organ development // inferred from mutant phenotype /// 8356 // asymmetric cell division //…	---	IPR001960 // WH1 // 5.0E-59 /// IPR003124 // Actin-binding WH2 // 4.2E-8 /// IPR003124 // Actin-binding WH2 // 6.1E-5 /// IPR000095 // PAK-box/P21-Rho-binding // 6.2E-16 /// IPR001960 // WH1 // 2.0E-55 /// IPR003124 // Actin-binding WH2 // 4.2E-8 /// IPR003124 // Actin-binding WH2 // 6.1E-5 /// IPR000095 // PAK-box/P21-Rho-binding // 6.2E-16
7305	148504_at	-0.339434	0.996879	-5.84372	1.81755e-06	2.20276e-05	4.82729	FBgn0036061	CG12524	CG12524	CG12524	39171	---	---	---	---
5309	146508_at	-0.267741	0.210568	-5.84316	1.82049e-06	2.20441e-05	4.8257	FBgn0032813	CG10262	CG10262	CG10262	35257	3677 // DNA binding // inferred from sequence or structural similarity /// 30337 // DNA polymerase processivity factor activity // inferred from electronic annotation /// 3677 // DNA binding // inferred from electronic annotation /// 3677 // DNA binding // inferred from sequence similarity	6260 // DNA replication // inferred from sequence or structural similarity /// 6275 // regulation of DNA replication // inferred from electronic annotation /// 6281 // DNA repair // inferred from electronic annotation /// 6260 // DNA replication // inferred from electronic annotation /// 6260 // DNA replication // inferred from sequence similarity	5634 // nucleus // inferred from electronic annotation	IPR000730 // Proliferating cell nuclear antigen, PCNA // 3.8E-60 /// IPR000730 // Proliferating cell nuclear antigen, PCNA // 7.6E-60
1627	142826_at	-0.303977	0.0393413	-5.84142	1.82961e-06	2.21355e-05	4.82076	FBgn0002777	CG7826	mnb	minibrain	32772	4672 // protein kinase activity // non-traceable author statement /// 4674 // protein serine/threonine kinase activity // inferred from sequence or structural similarity /// 4674 // protein serine/threonine kinase activity // non-traceable author statement /// 4702 // receptor signaling protein serine/threonine kinase activity // inferred from electronic annotation /// 4712 // protein threonine/t…	6468 // protein amino acid phosphorylation // non-traceable author statement /// 6917 // induction of apoptosis // inferred from electronic annotation /// 7398 // ectoderm development // inferred from electronic annotation /// 7399 // nervous system development // inferred from mutant phenotype /// 7420 // brain development // inferred from mutant phenotype /// 7420 // brain development // non-tr…	5634 // nucleus // inferred from electronic annotation	IPR000719 // Protein kinase // 8.4E-64
3629	144828_at	-0.373736	0.82656	-5.83183	1.88081e-06	2.26571e-05	4.79354	FBgn0003321	CG1664	sbr	small bristles	43944	3729 // mRNA binding // inferred from electronic annotation /// 8565 // protein transporter activity // inferred from electronic annotation /// 5515 // protein binding // inferred from physical interaction /// 5215 // transporter activity // inferred from electronic annotation /// 3723 // RNA binding // inferred from electronic annotation	6406 // mRNA export from nucleus // non-traceable author statement /// 6406 // mRNA export from nucleus // traceable author statement /// 6606 // protein import into nucleus // inferred from electronic annotation /// 7616 // long-term memory // non-traceable author statement /// 16973 // poly(A)+ mRNA export from nucleus // inferred from mutant phenotype /// 30534 // adult behavior // non-traceab…	5635 // nuclear envelope // inferred from direct assay /// 5654 // nucleoplasm // inferred from direct assay /// 5654 // nucleoplasm // non-traceable author statement /// 16020 // membrane // inferred from electronic annotation /// 16021 // integral to membrane // inferred from electronic annotation /// 5622 // intracellular // inferred from electronic annotation /// 5634 // nucleus // inferred f…	IPR005637 // TAP C-terminal domain // 3.4E-38
2221	143420_at	-0.361844	0.754839	-5.83008	1.8903e-06	2.27518e-05	4.78858	FBgn0004053	CG1046	zen	zerknullt	40828	3677 // DNA binding // inferred from electronic annotation /// 3700 // transcription factor activity // inferred from electronic annotation /// 3704 // specific RNA polymerase II transcription factor activity // inferred from sequence or structural similarity /// 3704 // specific RNA polymerase II transcription factor activity // inferred from sequence similarity	6357 // regulation of transcription from RNA polymerase II promoter // inferred from electronic annotation /// 7378 // amnioserosa formation // traceable author statement /// 7398 // ectoderm development // inferred from electronic annotation /// 7399 // nervous system development // inferred from electronic annotation /// 7450 // dorsal/ventral pattern formation, imaginal disc // non-traceable a…	5634 // nucleus // inferred from sequence or structural similarity /// 5634 // nucleus // non-traceable author statement /// 5634 // nucleus // inferred from sequence similarity	IPR001356 // Homeobox // 6.1E-29
10980	152179_at	-0.36828	1.19415	-5.82885	1.89695e-06	2.28123e-05	4.78512	FBgn0027564	CG3149	CG3149	CG3149	31489	5319 // lipid transporter activity // inferred from electronic annotation	280 // nuclear division // inferred from electronic annotation /// 6869 // lipid transport // inferred from electronic annotation	16021 // integral to membrane // inferred from electronic annotation	IPR007594 // Rft protein // 1.0E-126
4127	145326_s_at	-0.284422	0.913732	-5.82369	1.92535e-06	2.31263e-05	4.77046	FBgn0030959 /// FBgn0030956	CG18259 /// CG6961	CG6961 /// CG18259	CG6961 /// CG18259	32866 /// 32869	3729 // mRNA binding // inferred from sequence or structural similarity /// 166 // nucleotide binding // inferred from electronic annotation /// 3676 // nucleic acid binding // inferred from electronic annotation /// 3729 // mRNA binding // inferred from sequence similarity	---	---	IPR000504 // RNA-binding region RNP-1 (RNA recognition motif) // 8.7E-16
9004	150203_at	-0.320289	0.106207	-5.8235	1.92637e-06	2.31263e-05	4.76994	FBgn0038714	CG6240	CG6240	CG6240	42333	8010 // structural constituent of larval cuticle (sensu Insecta) // inferred from sequence or structural similarity /// 42302 // structural constituent of cuticle // inferred from electronic annotation /// 8010 // structural constituent of larval cuticle (sensu Insecta) // inferred from sequence similarity	---	---	IPR000618 // Insect cuticle protein // 1.0E-31
6321	147520_at	-0.723098	4.51921	-5.81762	1.95922e-06	2.34404e-05	4.75327	FBgn0034474	CG13873	Obp56g	Odorant-binding protein 56g	37270	5549 // odorant binding // inferred from sequence or structural similarity /// 5549 // odorant binding // non-traceable author statement /// 5549 // odorant binding // inferred from electronic annotation /// 5549 // odorant binding // inferred from sequence similarity	6810 // transport // inferred from electronic annotation /// 7606 // sensory perception of chemical stimulus // inferred from sequence or structural similarity /// 7606 // sensory perception of chemical stimulus // inferred from sequence similarity	---	IPR006170 // Pheromone/general odorant binding protein, PBP/GOBP // 3.9E-25 /// IPR006170 // Pheromone/general odorant binding protein, PBP/GOBP // 1.6E-23
5575	146774_at	-0.361226	-0.0386658	-5.81099	1.99697e-06	2.38107e-05	4.73444	FBgn0050377	CG30377	CG30377	CG30377	50252	---	---	---	---
11302	152501_at	-0.64827	2.57825	-5.81063	1.99907e-06	2.38154e-05	4.73341	FBgn0025352	CG4581	Thiolase	Thiolase	37784	3988 // acetyl-CoA C-acyltransferase activity // inferred from sequence or structural similarity /// 16509 // long-chain-3-hydroxyacyl-CoA dehydrogenase activity // inferred from sequence or structural similarity /// 8415 // acyltransferase activity // inferred from electronic annotation /// 16740 // transferase activity // inferred from electronic annotation /// 3988 // acetyl-CoA C-acyltransfer…	6635 // fatty acid beta-oxidation // inferred from sequence or structural similarity /// 6635 // fatty acid beta-oxidation // inferred from sequence similarity	16507 // fatty acid beta-oxidation multienzyme complex // inferred from sequence or structural similarity /// 16507 // fatty acid beta-oxidation multienzyme complex // inferred from sequence similarity	IPR002155 // Thiolase // 1.2E-60 /// IPR002155 // Thiolase // 6.8E-105
3595	144794_at	-0.366711	0.00893267	-5.80264	2.04555e-06	2.43263e-05	4.71074	FBgn0030193	CG12641	CG12641	CG12641	31963	---	---	---	---
8618	149817_at	-0.436791	0.0681896	-5.80233	2.04735e-06	2.43263e-05	4.70988	FBgn0038118	CG7855	timeout	timeout	41615	---	7275 // development // inferred from electronic annotation /// 19226 // transmission of nerve impulse // inferred from electronic annotation	---	IPR006906 // Timeless protein // 1.0E-126 /// IPR007725 // Timeless C-terminal // 1.0E-126
10756	151955_at	-0.436591	1.86632	-5.80156	2.05187e-06	2.43409e-05	4.7077	FBgn0000165	CG5779	Bc	Black cells	37044	4503 // monophenol monooxygenase activity // inferred from sequence or structural similarity /// 4503 // monophenol monooxygenase activity // non-traceable author statement /// 4503 // monophenol monooxygenase activity // traceable author statement /// 5344 // oxygen transporter activity // inferred from electronic annotation /// 4503 // monophenol monooxygenase activity // inferred from electron…	6810 // transport // inferred from electronic annotation /// 6952 // defense response // non-traceable author statement /// 9611 // response to wounding // inferred from mutant phenotype /// 9613 // response to pest, pathogen or parasite // inferred from mutant phenotype /// 35006 // melanization defense response // inferred from genetic interaction /// 35006 // melanization defense response // i…	---	IPR000896 // Arthropod hemocyanin/insect LSP // 2.2E-74 /// IPR005204 // Hemocyanin, N-terminal // 1.5E-6 /// IPR005203 // Hemocyanin, C-terminal // 8.0E-52
9302	150501_at	-0.33677	0.175367	-5.79514	2.09016e-06	2.47324e-05	4.68947	FBgn0011785	CG31132	BRWD3	BRWD3	---	---	---	---	IPR001680 // G-protein beta WD-40 repeat // 8.5E-9 /// IPR001680 // G-protein beta WD-40 repeat // 1.0E-7 /// IPR001680 // G-protein beta WD-40 repeat // 3.4E-8 /// IPR001680 // G-protein beta WD-40 repeat // 0.0012 /// IPR001680 // G-protein beta WD-40 repeat // 1.1E-6 /// IPR001680 // G-protein beta WD-40 repeat // 3.4E-4 /// IPR001680 // G-protein beta WD-40 repeat // 2.2E-6 /// IPR001680 // G…
7553	148752_at	-0.381542	0.0524505	-5.79427	2.09536e-06	2.4773e-05	4.68702	FBgn0036427	CG4613	CG4613	CG4613	39586	4252 // serine-type endopeptidase activity // inferred from sequence or structural similarity /// 4263 // chymotrypsin activity // inferred from electronic annotation /// 4295 // trypsin activity // non-traceable author statement /// 4252 // serine-type endopeptidase activity // inferred from sequence similarity	6508 // proteolysis // non-traceable author statement	---	IPR001254 // Peptidase S1, chymotrypsin // 2.2E-82
8616	149815_at	-0.338393	0.205914	-5.79348	2.10015e-06	2.48087e-05	4.68477	FBgn0038113	CG11668	CG11668	CG11668	41606	4252 // serine-type endopeptidase activity // inferred from sequence or structural similarity /// 4263 // chymotrypsin activity // inferred from electronic annotation /// 4295 // trypsin activity // non-traceable author statement /// 4252 // serine-type endopeptidase activity // inferred from electronic annotation /// 8233 // peptidase activity // inferred from electronic annotation /// 16787 // …	6508 // proteolysis // non-traceable author statement /// 6508 // proteolysis // inferred from electronic annotation	---	IPR001254 // Peptidase S1, chymotrypsin // 4.1E-50
2197	143396_at	-0.299376	0.582855	-5.78879	2.12872e-06	2.51114e-05	4.67145	FBgn0003900	CG2956	twi	twist	37655	3677 // DNA binding // non-traceable author statement /// 3704 // specific RNA polymerase II transcription factor activity // inferred from sequence or structural similarity /// 16563 // transcriptional activator activity // non-traceable author statement /// 42803 // protein homodimerization activity // inferred from physical interaction /// 46982 // protein heterodimerization activity // inferr…	1710 // mesodermal cell fate commitment // traceable author statement /// 6357 // regulation of transcription from RNA polymerase II promoter // inferred from sequence or structural similarity /// 7369 // gastrulation // non-traceable author statement /// 7370 // ventral furrow formation // traceable author statement /// 7375 // anterior midgut invagination // non-traceable author statement /// 7…	5634 // nucleus // inferred from sequence or structural similarity /// 5634 // nucleus // non-traceable author statement /// 5634 // nucleus // inferred from direct assay /// 5634 // nucleus // inferred from electronic annotation /// 5634 // nucleus // inferred from sequence similarity	IPR001092 // Basic helix-loop-helix dimerization domain bHLH // 2.0E-20
12304	153503_at	-0.392933	2.99368	-5.7881	2.13291e-06	2.51321e-05	4.66951	FBgn0034654	CG10306	CG10306	CG10306	37475	3743 // translation initiation factor activity // inferred from sequence or structural similarity /// 5515 // protein binding // inferred from physical interaction /// 3743 // translation initiation factor activity // inferred from electronic annotation /// 3743 // translation initiation factor activity // inferred from sequence similarity	6413 // translational initiation // inferred from sequence or structural similarity /// 6412 // protein biosynthesis // inferred from electronic annotation /// 6413 // translational initiation // inferred from electronic annotation /// 6413 // translational initiation // inferred from sequence similarity	5634 // nucleus // inferred from electronic annotation /// 5852 // eukaryotic translation initiation factor 3 complex // inferred from sequence or structural similarity /// 5852 // eukaryotic translation initiation factor 3 complex // inferred from sequence similarity	IPR009374 // Eukaryotic translation initiation factor 3 subunit 11 // 1.0E-126
13277	154476_at	-0.429392	0.2151	-5.78738	2.13734e-06	2.51631e-05	4.66746	FBgn0031052	CG14215	CG14215	CG14215	32971	16740 // transferase activity // inferred from electronic annotation	8152 // metabolism // inferred from electronic annotation	---	---
8857	150056_at	-0.51665	1.99805	-5.78248	2.16772e-06	2.5478e-05	4.65355	FBgn0038488	CG11896	CG11896	CG11896	42076	---	---	---	IPR002110 // Ankyrin // 6.1E-5 /// IPR002110 // Ankyrin // 7.7E-5 /// IPR002110 // Ankyrin // 1.1E-4 /// IPR002110 // Ankyrin // 0.19 /// IPR002110 // Ankyrin // 2.3E-7 /// IPR002110 // Ankyrin // 1.6E-4 /// IPR002110 // Ankyrin // 0.0049
2611	143810_at	-0.330667	-0.0411749	-5.77193	2.23454e-06	2.60882e-05	4.62362	FBgn0015519	CG2302	nAcR7E	nicotinic Acetylcholine Receptor alpha 7E	31767	4889 // nicotinic acetylcholine-activated cation-selective channel activity // inferred from sequence or structural similarity /// 15464 // acetylcholine receptor activity // inferred from electronic annotation /// 4872 // receptor activity // inferred from electronic annotation /// 4889 // nicotinic acetylcholine-activated cation-selective channel activity // inferred from electronic annotation …	6812 // cation transport // inferred from electronic annotation /// 6936 // muscle contraction // inferred from electronic annotation /// 7270 // nerve-nerve synaptic transmission // inferred from electronic annotation /// 7274 // neuromuscular synaptic transmission // inferred from electronic annotation /// 6810 // transport // inferred from electronic annotation /// 6811 // ion transport // inf…	5892 // nicotinic acetylcholine-gated receptor-channel complex // inferred from sequence or structural similarity /// 45211 // postsynaptic membrane // inferred from electronic annotation /// 16020 // membrane // inferred from electronic annotation /// 16021 // integral to membrane // inferred from electronic annotation /// 5892 // nicotinic acetylcholine-gated receptor-channel complex // inferre…	IPR006029 // Neurotransmitter-gated ion-channel transmembrane region // 4.5E-33 /// IPR006029 // Neurotransmitter-gated ion-channel transmembrane region // 4.9E-45 /// IPR006202 // Neurotransmitter-gated ion-channel ligand binding domain // 1.6E-112
8772	149971_at	-0.321096	0.435125	-5.77102	2.24038e-06	2.61129e-05	4.62104	FBgn0038357	CG5623	CG5623	CG5623	41904	5515 // protein binding // inferred from physical interaction	---	---	IPR009961 // Protein of unknown function DUF1487 // 1.0E-126
9239	150438_at	-0.629788	1.44556	-5.77065	2.24278e-06	2.61191e-05	4.61999	FBgn0039069	CG6763	CG6763	CG6763	42754	4238 // meprin A activity // inferred from sequence or structural similarity /// 8270 // zinc ion binding // inferred from electronic annotation /// 8533 // astacin activity // inferred from electronic annotation /// 5515 // protein binding // inferred from physical interaction /// 8237 // metallopeptidase activity // inferred from electronic annotation /// 4238 // meprin A activity // inferred f…	6508 // proteolysis // inferred from electronic annotation	17090 // meprin A complex // inferred from sequence or structural similarity /// 17090 // meprin A complex // inferred from sequence similarity	IPR001506 // Peptidase M12A, astacin // 5.5E-93
1929	143128_at	-0.462335	0.705375	-5.76981	2.24821e-06	2.61606e-05	4.6176	FBgn0000479	CG32498	dnc	dunce	31309	4114 // 3',5'-cyclic-nucleotide phosphodiesterase activity // non-traceable author statement /// 4115 // 3',5'-cyclic-AMP phosphodiesterase activity // inferred from sequence or structural similarity /// 4115 // 3',5'-cyclic-AMP phosphodiesterase activity // traceable author statement /// 4114 // 3',5'-cyclic-nucleotide phosphodiesterase activity // inferred from electronic annotation /// 16787 /…	3 // reproduction // non-traceable author statement /// 7268 // synaptic transmission // inferred from mutant phenotype /// 7610 // behavior // traceable author statement /// 7611 // learning and/or memory // non-traceable author statement /// 7611 // learning and/or memory // traceable author statement /// 7612 // learning // non-traceable author statement /// 7613 // memory // traceable author …	---	IPR002073 // 35-cyclic nucleotide phosphodiesterase // 1.0E-126
1913	143112_at	-0.510411	0.207791	-5.76823	2.25846e-06	2.62581e-05	4.61312	FBgn0000360	CG11213	Cp38	Chorion protein 38	31788	5213 // structural constituent of chorion (sensu Insecta) // non-traceable author statement	7306 // insect chorion formation // non-traceable author statement	42600 // chorion // inferred from electronic annotation	---
[truncated: 1,692 more rows]
