# Supplementary material for: Gene expression changes in response to aging compared to heat stress, oxidative stress and ionizing radiation in Drosophila melanogaster
Source: Aging (Albany NY). 2012 Nov 30;4(11):768–89. doi: 10.18632/aging.100499 (PMC3560439; doi:10.18632/aging.100499)
Supplement: Supplementary file 9 [file aging-04-768-s009.xlsx]

## Sheet: TableS4e.O2up
Table S4e. O2 up
index	ID	M	A	t	P.Value	adj.P.Val	B	FlyBase	Ensembl	Gene.Symbol	Gene.Title	Entrez.Gene	Gene.Ontology.Molecular.Function	Gene.Ontology.Biological.Process	Gene.Ontology.Cellular.Component	InterPro
8557	149756_at	4.21093	2.01697	28.9294	3.13e-24	1.91e-21	45.3114	FBgn0010038	CG4181	GstD2	Glutathione S transferase D2	48335	4364 // glutathione transferase activity // inferred from direct assay /// 4364 // glutathione transferase activity // inferred from sequence or structural similarity /// 4364 // glutathione transferase activity // non-traceable author statement /// 4602 // glutathione peroxidase activity // traceable author statement /// 4364 // glutathione transferase activity // inferred from sequence similari…	6952 // defense response // inferred from electronic annotation /// 9636 // response to toxin // inferred from electronic annotation	---	IPR004046 // Glutathione S-transferase, C-terminal // 8.6E-12 /// IPR004045 // Glutathione S-transferase, N-terminal // 6.4E-18
9837	151036_f_at	3.88692	0.423338	19.0471	7.91e-19	9.63e-17	32.9465	FBgn0051354 /// FBgn0013277 /// FBgn0013276 /// FBgn0013278 /// FBgn0013279	CG18743 /// CG31449 /// CG5834 /// CG31359 /// CG6489	Hsp70Bbb /// Hsp70Ba /// Hsp70Ab /// Hsp70Bb /// Hsp70Bc	Hsp70Bbb /// Heat-shock-protein-70Ba /// Heat-shock-protein-70Ab /// Heat-shock-protein-70Bb /// Heat-shock-protein-70Bc	44920 /// 44921 /// 48582 /// 48583 /// 50022	5524 // ATP binding // inferred from electronic annotation /// 166 // nucleotide binding // inferred from electronic annotation	6457 // protein folding // inferred from electronic annotation /// 6461 // protein complex assembly // inferred from electronic annotation /// 6952 // defense response // inferred from electronic annotation /// 9408 // response to heat // inferred from sequence or structural similarity /// 9408 // response to heat // non-traceable author statement /// 6986 // response to unfolded protein // infer…	---	IPR001023 // Heat shock protein Hsp70 // 1.0E-126
8583	149782_at	3.62538	1.72579	19.3465	5.03e-19	6.97e-17	33.4018	FBgn0013279 /// FBgn0013278 /// FBgn0013277 /// FBgn0051354	CG31449 /// CG5834 /// CG31359 /// CG6489	Hsp70Bc /// Hsp70Bb /// Hsp70Ba /// Hsp70Bbb	Heat-shock-protein-70Bc /// Heat-shock-protein-70Bb /// Heat-shock-protein-70Ba /// Hsp70Bbb	44921 /// 48582 /// 48583 /// 50022	5524 // ATP binding // inferred from electronic annotation /// 166 // nucleotide binding // inferred from electronic annotation	6457 // protein folding // inferred from electronic annotation /// 6461 // protein complex assembly // inferred from electronic annotation /// 6952 // defense response // inferred from electronic annotation /// 9408 // response to heat // non-traceable author statement /// 9408 // response to heat // inferred from sequence or structural similarity /// 6986 // response to unfolded protein // infer…	---	IPR001023 // Heat shock protein Hsp70 // 1.0E-126
11399	152598_at	3.23757	2.91714	29.4816	1.76e-24	1.16e-21	45.8732	FBgn0034335	CG5164	GstE1	Glutathione S transferase E1	37106	4364 // glutathione transferase activity // inferred from sequence or structural similarity /// 4364 // glutathione transferase activity // non-traceable author statement /// 5515 // protein binding // inferred from physical interaction /// 16740 // transferase activity // inferred from electronic annotation /// 4364 // glutathione transferase activity // inferred from sequence similarity	6952 // defense response // inferred from electronic annotation /// 6979 // response to oxidative stress // non-traceable author statement /// 9636 // response to toxin // inferred from electronic annotation	---	IPR004046 // Glutathione S-transferase, C-terminal // 4.7E-11 /// IPR004045 // Glutathione S-transferase, N-terminal // 1.1E-19
1863	143062_at	3.11127	2.01652	33.2352	4.56e-26	1.25e-22	49.4238	FBgn0000053	CG31628	ade3	adenosine 3	33986	4637 // phosphoribosylamine-glycine ligase activity // inferred from sequence or structural similarity /// 4637 // phosphoribosylamine-glycine ligase activity // non-traceable author statement /// 4641 // phosphoribosylformylglycinamidine cyclo-ligase activity // inferred from sequence or structural similarity /// 4641 // phosphoribosylformylglycinamidine cyclo-ligase activity // non-traceable au…	6144 // purine base metabolism // inferred from electronic annotation /// 6189 // 'de novo' IMP biosynthesis // inferred from sequence or structural similarity /// 6189 // 'de novo' IMP biosynthesis // non-traceable author statement /// 9113 // purine base biosynthesis // inferred from electronic annotation /// 6189 // 'de novo' IMP biosynthesis // inferred from sequence similarity	5737 // cytoplasm // inferred from electronic annotation	IPR000115 // Phosphoribosylglycinamide synthetase // 7.3E-66 /// IPR010918 // AIR synthase related protein, C-terminal // 1.8E-24 /// IPR010918 // AIR synthase related protein, C-terminal // 1.8E-44 /// IPR002376 // Formyl transferase, N-terminal // 1.6E-101 /// IPR000115 // Phosphoribosylglycinamide synthetase // 2.9E-99 /// IPR000115 // Phosphoribosylglycinamide synthetase // 2.5E-50 /// IPR000…
10568	151767_at	3.06466	2.69898	25.6681	1.16e-22	4.52e-20	41.7546	FBgn0010222	CG18466	Nmdmc	NAD-dependent methylenetetrahydrofolate dehydrogenase	47895	287 // magnesium ion binding // non-traceable author statement /// 4477 // methenyltetrahydrofolate cyclohydrolase activity // inferred from sequence or structural similarity /// 4477 // methenyltetrahydrofolate cyclohydrolase activity // non-traceable author statement /// 4487 // methylenetetrahydrofolate dehydrogenase (NAD+) activity // non-traceable author statement /// 4488 // methylenetetrah…	5975 // carbohydrate metabolism // inferred from sequence or structural similarity /// 8652 // amino acid biosynthesis // inferred from electronic annotation /// 9256 // 10-formyltetrahydrofolate metabolism // inferred from sequence or structural similarity /// 9396 // folic acid and derivative biosynthesis // inferred from electronic annotation /// 46653 // tetrahydrofolate metabolism // inferre…	5739 // mitochondrion // inferred from sequence or structural similarity /// 5739 // mitochondrion // non-traceable author statement /// 5739 // mitochondrion // inferred from electronic annotation /// 5739 // mitochondrion // inferred from sequence similarity	IPR000672 // Tetrahydrofolate dehydrogenase/cyclohydrolase // 5.3E-79 /// IPR000672 // Tetrahydrofolate dehydrogenase/cyclohydrolase // 3.5E-112 /// IPR000672 // Tetrahydrofolate dehydrogenase/cyclohydrolase // 5.3E-79 /// IPR000672 // Tetrahydrofolate dehydrogenase/cyclohydrolase // 3.5E-112
11681	152880_at	2.78893	3.30742	33.139	4.98e-26	1.25e-22	49.3381	FBgn0033765	CG8772	nemy	no extended memory	36396	4359 // glutaminase activity // inferred from sequence or structural similarity /// 5515 // protein binding // inferred from physical interaction /// 4359 // glutaminase activity // inferred from electronic annotation /// 5509 // calcium ion binding // inferred from electronic annotation /// 4359 // glutaminase activity // inferred from sequence similarity	6541 // glutamine metabolism // inferred from sequence or structural similarity /// 7613 // memory // inferred from mutant phenotype /// 7626 // locomotory behavior // inferred from mutant phenotype /// 6541 // glutamine metabolism // inferred from electronic annotation /// 6541 // glutamine metabolism // inferred from sequence similarity	5739 // mitochondrion // inferred from sequence or structural similarity /// 5739 // mitochondrion // inferred from sequence similarity	IPR002110 // Ankyrin // 9.4E-9 /// IPR007043 // Glutaminase // 1.0E-126 /// IPR002110 // Ankyrin // 9.4E-9 /// IPR007043 // Glutaminase // 1.0E-126 /// IPR002110 // Ankyrin // 9.4E-9 /// IPR007043 // Glutaminase // 1.0E-126 /// IPR002110 // Ankyrin // 9.4E-9 /// IPR007043 // Glutaminase // 1.0E-126 /// IPR002110 // Ankyrin // 9.4E-9 /// IPR007043 // Glutaminase // 1.0E-126
10631	151830_at	2.78019	3.46679	30.937	4.07e-25	4.61e-22	47.3032	FBgn0011296	CG4533	l(2)efl	lethal (2) essential for life	37744	42802 // identical protein binding // inferred from physical interaction	6457 // protein folding // inferred from electronic annotation /// 6950 // response to stress // inferred from electronic annotation /// 6952 // defense response // inferred from electronic annotation /// 9408 // response to heat // non-traceable author statement /// 9790 // embryonic development // non-traceable author statement /// 6986 // response to unfolded protein // inferred from electroni…	---	IPR002068 // Heat shock protein Hsp20 // 1.0E-18 /// IPR002068 // Heat shock protein Hsp20 // 1.2E-35 /// IPR002068 // Heat shock protein Hsp20 // 6.7E-19
11923	153122_at	2.69125	3.47582	30.7474	4.91e-25	4.61e-22	47.121	FBgn0000052	CG9127	ade2	adenosine 2	33847	4642 // phosphoribosylformylglycinamidine synthase activity // inferred from sequence or structural similarity /// 4642 // phosphoribosylformylglycinamidine synthase activity // non-traceable author statement /// 3824 // catalytic activity // inferred from electronic annotation /// 4642 // phosphoribosylformylglycinamidine synthase activity // inferred from electronic annotation /// 4642 // phosp…	6144 // purine base metabolism // inferred from electronic annotation /// 6189 // 'de novo' IMP biosynthesis // inferred from sequence or structural similarity /// 6189 // 'de novo' IMP biosynthesis // non-traceable author statement /// 6189 // 'de novo' IMP biosynthesis // inferred from electronic annotation /// 6189 // 'de novo' IMP biosynthesis // inferred from sequence similarity	---	IPR010918 // AIR synthase related protein, C-terminal // 2.2E-29 /// IPR010918 // AIR synthase related protein, C-terminal // 3.0E-14 /// IPR000728 // AIR synthase related protein // 1.3E-41
5058	146257_at	2.62165	2.71534	24.5186	4.59e-22	1.46e-19	40.3929	FBgn0032382	CG14935	CG14935	CG14935	34598	4556 // alpha-amylase activity // inferred from electronic annotation /// 4558 // alpha-glucosidase activity // inferred from sequence or structural similarity /// 5215 // transporter activity // inferred from electronic annotation /// 4558 // alpha-glucosidase activity // inferred from sequence similarity	5975 // carbohydrate metabolism // inferred from electronic annotation	---	IPR006047 // Alpha amylase, catalytic domain // 3.7E-113 /// IPR006047 // Alpha amylase, catalytic domain // 3.7E-113
2582	143781_at	2.61074	2.24211	32.1326	1.28e-25	2.24e-22	48.4264	FBgn0015035	CG4105	Cyp4e3	Cytochrome P450-4e3	34291	4497 // monooxygenase activity // inferred from electronic annotation /// 16491 // oxidoreductase activity // inferred from electronic annotation /// 5506 // iron ion binding // inferred from electronic annotation /// 20037 // heme binding // inferred from electronic annotation /// 46872 // metal ion binding // inferred from electronic annotation	6118 // electron transport // inferred from electronic annotation /// 8202 // steroid metabolism // inferred from electronic annotation	5792 // microsome // non-traceable author statement /// 16020 // membrane // non-traceable author statement /// 5783 // endoplasmic reticulum // inferred from electronic annotation /// 5792 // microsome // inferred from electronic annotation /// 16020 // membrane // inferred from electronic annotation	IPR001128 // Cytochrome P450 // 3.7E-94 /// IPR001128 // Cytochrome P450 // 5.6E-76
5086	146285_at	2.59405	2.25696	24.0326	8.35e-22	2.49e-19	39.7984	FBgn0043841	CG31764	vir-1	virus-induced RNA 1	34652	---	---	---	---
12562	153761_at	2.49061	3.03911	30.1407	9e-25	6.64e-22	46.5297	FBgn0039241	CG11089	CG11089	CG11089	42973	3937 // IMP cyclohydrolase activity // inferred from sequence or structural similarity /// 4643 // phosphoribosylaminoimidazolecarboxamide formyltransferase activity // inferred from sequence or structural similarity /// 3937 // IMP cyclohydrolase activity // inferred from electronic annotation /// 4643 // phosphoribosylaminoimidazolecarboxamide formyltransferase activity // inferred from electro…	6144 // purine base metabolism // inferred from electronic annotation /// 6164 // purine nucleotide biosynthesis // inferred from electronic annotation	---	IPR002695 // AICARFT/IMPCHase bienzyme // 1.0E-126 /// IPR004362 // Methylglyoxal synthase-like domain // 3.3E-49
13739	154938_at	2.4201	2.38038	11.2196	1.58e-12	5.07e-11	18.2697	FBgn0030013	CG1583	CG1583	CG1583	31747	4623 // phospholipase A2 activity // inferred from sequence or structural similarity /// 5509 // calcium ion binding // inferred from electronic annotation /// 4623 // phospholipase A2 activity // inferred from electronic annotation /// 4623 // phospholipase A2 activity // inferred from sequence similarity	6629 // lipid metabolism // inferred from electronic annotation /// 6644 // phospholipid metabolism // inferred from electronic annotation /// 16042 // lipid catabolism // inferred from electronic annotation	5576 // extracellular region // inferred from electronic annotation	IPR008774 // A2 Phospholipase // 4.1E-70
12742	153941_at	2.41161	1.41468	8.01393	4.29e-09	6.82e-08	10.2591	FBgn0037724 /// FBgn0003334	CG9434	Fst /// Scm	Frost /// Sex comb on midleg	41168 /// 41169	3682 // chromatin binding // inferred from electronic annotation /// 3704 // specific RNA polymerase II transcription factor activity // non-traceable author statement	9409 // response to cold // inferred from expression pattern /// 9409 // response to cold // non-traceable author statement /// 16458 // gene silencing // inferred from genetic interaction /// 16458 // gene silencing // inferred from mutant phenotype /// 30708 // female germ-line cyst encapsulation (sensu Insecta) // inferred from mutant phenotype /// 30713 // stalk formation (sensu Insecta) // i…	5634 // nucleus // non-traceable author statement /// 35102 // PRC1 complex // traceable author statement	---
5998	147197_at	2.408	0.945784	26.7064	3.52e-23	1.64e-20	42.9338	FBgn0033928	CG13941	CG13941	CG13941	36597	---	---	---	IPR005162 // Retrotransposon gag protein // 1.5E-6
7285	148484_at	2.33424	3.43151	14.8105	9.94e-16	5.78e-14	25.7455	FBgn0036030	CG6767	CG6767	CG6767	39132	4749 // ribose phosphate diphosphokinase activity // inferred from sequence or structural similarity /// 16978 // lipoate-protein ligase B activity // inferred from electronic annotation /// 19201 // nucleotide kinase activity // inferred from electronic annotation /// 5515 // protein binding // inferred from physical interaction /// 42802 // identical protein binding // inferred from physical in…	6144 // purine base metabolism // inferred from electronic annotation /// 6206 // pyrimidine base metabolism // inferred from electronic annotation /// 9116 // nucleoside metabolism // inferred from electronic annotation /// 9156 // ribonucleoside monophosphate biosynthesis // inferred from electronic annotation /// 9165 // nucleotide biosynthesis // inferred from electronic annotation	---	IPR000836 // Phosphoribosyltransferase // 4.6E-38 /// IPR000836 // Phosphoribosyltransferase // 4.6E-38
6011	147210_at	2.30154	3.01457	28.0925	7.62e-24	4.27e-21	44.4387	FBgn0033945	CG12868	CG12868	CG12868	36620	---	---	---	---
6021	147220_s_at	2.20633	1.79942	6.23798	5.87e-07	6.1e-06	5.29806	FBgn0041581 /// FBgn0012042	CG10146 /// CG18372	AttB /// AttA	Attacin-B /// Attacin-A	36636 /// 36637	---	6961 // antibacterial humoral response (sensu Protostomia) // inferred from expression pattern /// 6961 // antibacterial humoral response (sensu Protostomia) // non-traceable author statement /// 42742 // defense response to bacteria // traceable author statement /// 50829 // defense response to Gram-negative bacteria // inferred from expression pattern /// 50829 // defense response to Gram-negat…	5576 // extracellular region // inferred from electronic annotation /// 5576 // extracellular region // traceable author statement	IPR005521 // Attacin, C-terminal region // 3.5E-70 /// IPR005520 // Attacin, N-terminal region // 7.5E-34 /// IPR005521 // Attacin, C-terminal region // 2.2E-69 /// IPR005520 // Attacin, N-terminal region // 1.7E-33 /// IPR005520 // Attacin, N-terminal region // 9.8E-24
12229	153428_at	2.19766	4.73518	32.2309	1.17e-25	2.24e-22	48.5168	FBgn0020513	CG3989	ade5	ade5	32228	4638 // phosphoribosylaminoimidazole carboxylase activity // inferred from sequence or structural similarity /// 4639 // phosphoribosylaminoimidazolesuccinocarboxamide synthase activity // inferred from sequence or structural similarity /// 42802 // identical protein binding // inferred from physical interaction /// 3824 // catalytic activity // inferred from electronic annotation /// 4638 // pho…	6144 // purine base metabolism // inferred from electronic annotation /// 6164 // purine nucleotide biosynthesis // inferred from electronic annotation /// 6189 // 'de novo' IMP biosynthesis // inferred from electronic annotation /// 9113 // purine base biosynthesis // inferred from genetic interaction	9320 // phosphoribosylaminoimidazole carboxylase complex // inferred from electronic annotation	IPR001636 // SAICAR synthetase // 2.4E-96 /// IPR000031 // 1-(5-Phosphoribosyl)-5-amino-4-imidazole-carboxylate (AIR) carboxylase // 2.8E-50
7974	149173_at	2.16307	1.70355	31.6185	2.09e-25	2.93e-22	47.9489	FBgn0037071	CG7632	CG7632	CG7632	40357	5509 // calcium ion binding // inferred from electronic annotation /// 5544 // calcium-dependent phospholipid binding // inferred from electronic annotation /// 16787 // hydrolase activity // inferred from electronic annotation /// 3824 // catalytic activity // inferred from electronic annotation	---	---	---
6326	147525_at	2.09591	2.92419	16.3172	6.64e-17	5.25e-15	28.4818	FBgn0034480	CG16898	CG16898	CG16898	37276	16301 // kinase activity // inferred from electronic annotation /// 16740 // transferase activity // inferred from electronic annotation	---	---	IPR004119 // Protein of unknown function DUF227 // 1.8E-101
34	141233_at	2.08225	2.76223	17.1611	1.59e-17	1.4e-15	29.9256	FBgn0029831	CG5966	CG5966	CG5966	31532	4806 // triacylglycerol lipase activity // inferred from sequence or structural similarity /// 3824 // catalytic activity // inferred from electronic annotation /// 4806 // triacylglycerol lipase activity // inferred from sequence similarity	6629 // lipid metabolism // inferred from electronic annotation	---	IPR000734 // Lipase // 5.1E-77
11702	152901_at	2.08217	3.6743	20.8413	5.7e-20	9.99e-18	35.5848	FBgn0032699	CG10383	CG10383	CG10383	35123	5488 // binding // inferred from electronic annotation	---	---	---
13122	154321_at	2.07246	5.58662	19.9279	2.12e-19	3.26e-17	34.2684	FBgn0015222	CG2216	Fer1HCH	Ferritin 1 heavy chain homologue	46415	8198 // ferrous iron binding // inferred from direct assay /// 8198 // ferrous iron binding // inferred from sequence or structural similarity /// 8198 // ferrous iron binding // non-traceable author statement /// 8199 // ferric iron binding // inferred from electronic annotation /// 5515 // protein binding // inferred from physical interaction /// 5488 // binding // inferred from electronic anno…	6826 // iron ion transport // inferred from electronic annotation /// 6879 // iron ion homeostasis // inferred from direct assay /// 6879 // iron ion homeostasis // inferred from sequence or structural similarity /// 6879 // iron ion homeostasis // non-traceable author statement /// 6879 // iron ion homeostasis // inferred from electronic annotation /// 6879 // iron ion homeostasis // inferred fr…	8043 // ferritin complex // inferred from direct assay /// 8043 // ferritin complex // inferred from sequence or structural similarity /// 8043 // ferritin complex // non-traceable author statement /// 8043 // ferritin complex // inferred from sequence similarity	IPR008331 // Ferritin and Dps // 3.0E-47 /// IPR008331 // Ferritin and Dps // 3.1E-22
12985	154184_at	2.03812	4.01528	23.7916	1.13e-21	3.23e-19	39.4993	FBgn0023129	CG3705	aay	astray	39085	4647 // phosphoserine phosphatase activity // inferred from sequence or structural similarity /// 4647 // phosphoserine phosphatase activity // non-traceable author statement /// 287 // magnesium ion binding // inferred from electronic annotation /// 3824 // catalytic activity // inferred from electronic annotation /// 4647 // phosphoserine phosphatase activity // inferred from electronic annotat…	6563 // L-serine metabolism // inferred from sequence or structural similarity /// 6564 // L-serine biosynthesis // non-traceable author statement /// 7411 // axon guidance // inferred from mutant phenotype /// 7422 // peripheral nervous system development // traceable author statement /// 6564 // L-serine biosynthesis // inferred from electronic annotation /// 8152 // metabolism // inferred from…	---	IPR005834 // Haloacid dehalogenase-like hydrolase // 5.7E-9
1998	143197_at	2.02998	2.04211	11.4377	9.71e-13	3.25e-11	18.7668	FBgn0001230	CG5436	Hsp68	Heat shock protein 68	42852	5524 // ATP binding // inferred from electronic annotation /// 51082 // unfolded protein binding // inferred from sequence or structural similarity /// 166 // nucleotide binding // inferred from electronic annotation /// 51082 // unfolded protein binding // inferred from sequence similarity	6457 // protein folding // inferred from electronic annotation /// 6457 // protein folding // inferred from sequence or structural similarity /// 6461 // protein complex assembly // inferred from electronic annotation /// 6952 // defense response // inferred from electronic annotation /// 8340 // determination of adult life span // inferred from mutant phenotype /// 9408 // response to heat // in…	5739 // mitochondrion // inferred from sequence or structural similarity /// 5739 // mitochondrion // inferred from sequence similarity	IPR001023 // Heat shock protein Hsp70 // 1.0E-126
8558	149757_at	2.02043	2.06699	23.7205	1.23e-21	3.27e-19	39.4105	FBgn0010039	CG4381	GstD3	Glutathione S transferase D3	48336	4364 // glutathione transferase activity // inferred from sequence or structural similarity /// 4364 // glutathione transferase activity // non-traceable author statement /// 4364 // glutathione transferase activity // inferred from electronic annotation /// 16740 // transferase activity // inferred from electronic annotation /// 4364 // glutathione transferase activity // inferred from sequence …	6952 // defense response // inferred from electronic annotation /// 9636 // response to toxin // inferred from electronic annotation	---	IPR004046 // Glutathione S-transferase, C-terminal // 7.5E-13 /// IPR004045 // Glutathione S-transferase, N-terminal // 1.7E-14
10773	151972_at	1.97901	3.10148	25.2253	1.96e-22	7.04e-20	41.2373	FBgn0030679	CG8206	CG8206	CG8206	32516	5515 // protein binding // inferred from physical interaction	---	---	IPR007853 // DNL zinc finger // 9.8E-41
5952	147151_at	1.89048	4.45083	10.175	1.8e-11	4.64e-10	15.8056	FBgn0033835	---	IM10	Immune induced molecule 10	36486	---	6952 // defense response // inferred from direct assay /// 8063 // Toll signaling pathway // non-traceable author statement /// 19731 // antibacterial humoral response // inferred from direct assay /// 6955 // immune response // inferred from electronic annotation /// 45087 // innate immune response // inferred from electronic annotation	5576 // extracellular region // inferred from direct assay	---
1637	142836_at	1.8844	3.51267	14.1999	3.16e-15	1.66e-13	24.5741	FBgn0068141	CG4460 /// CG4456	DyakHsp67Bb	Hsp67Bb	---	---	8340 // determination of adult life span // inferred from mutant phenotype /// 9408 // response to heat // inferred from sequence or structural similarity /// 9408 // response to heat // non-traceable author statement /// 42026 // protein refolding // non-traceable author statement /// 6457 // protein folding // inferred from electronic annotation /// 6986 // response to unfolded protein // infer…	---	---
4448	145647_at	1.86551	1.5542	27.9752	8.65e-24	4.49e-21	44.3143	FBgn0031432	CG9964	Cyp309a1	Cyp309a1	33438	3677 // DNA binding // inferred from electronic annotation /// 4497 // monooxygenase activity // inferred from electronic annotation /// 16491 // oxidoreductase activity // inferred from electronic annotation /// 5506 // iron ion binding // inferred from electronic annotation /// 20037 // heme binding // inferred from electronic annotation /// 46872 // metal ion binding // inferred from electroni…	6118 // electron transport // inferred from electronic annotation /// 6306 // DNA methylation // inferred from electronic annotation /// 8202 // steroid metabolism // inferred from electronic annotation	5792 // microsome // non-traceable author statement /// 16020 // membrane // non-traceable author statement /// 5783 // endoplasmic reticulum // inferred from electronic annotation /// 5792 // microsome // inferred from electronic annotation /// 16020 // membrane // inferred from electronic annotation	IPR001128 // Cytochrome P450 // 1.8E-6 /// IPR001128 // Cytochrome P450 // 2.2E-44
4647	145846_at	1.85046	0.00154663	11.0316	2.43e-12	7.56e-11	17.8364	FBgn0031736	CG11030	CG11030	CG11030	33805	---	---	---	---
2585	143784_at	1.84774	5.45138	26.1615	6.55e-23	2.78e-20	42.3207	FBgn0015221	CG1469	Fer2LCH	Ferritin 2 light chain homologue	44965	8198 // ferrous iron binding // inferred from direct assay /// 8199 // ferric iron binding // inferred from electronic annotation	6879 // iron ion homeostasis // inferred from direct assay /// 6879 // iron ion homeostasis // inferred from electronic annotation	8043 // ferritin complex // inferred from direct assay	---
175	141374_at	1.83277	1.36497	5.62955	3.37e-06	2.93e-05	3.5483	FBgn0012042	CG10146	AttA	Attacin-A	36636	---	6961 // antibacterial humoral response (sensu Protostomia) // inferred from expression pattern /// 6961 // antibacterial humoral response (sensu Protostomia) // non-traceable author statement /// 42742 // defense response to bacteria // traceable author statement /// 50829 // defense response to Gram-negative bacteria // inferred from expression pattern /// 50829 // defense response to Gram-negat…	5576 // extracellular region // inferred from electronic annotation	IPR005521 // Attacin, C-terminal region // 3.5E-70 /// IPR005520 // Attacin, N-terminal region // 7.5E-34 /// IPR005520 // Attacin, N-terminal region // 9.8E-24
2995	144194_at	1.81554	3.23598	21.0734	4.12e-20	7.69e-18	35.9108	FBgn0027836	CG5729	Dgp-1	Dgp-1	37080	5525 // GTP binding // inferred from sequence or structural similarity /// 16818 // hydrolase activity, acting on acid anhydrides, in phosphorus-containing anhydrides // inferred from electronic annotation /// 5525 // GTP binding // inferred from electronic annotation /// 5525 // GTP binding // inferred from sequence similarity	6412 // protein biosynthesis // inferred from electronic annotation	---	IPR004161 // Elongation factor Tu, domain 2 // 1.2E-11 /// IPR000795 // Protein synthesis factor, GTP-binding // 6.1E-13 /// IPR004160 // Elongation factor Tu, C-terminal // 7.7E-20
10826	152025_at	1.80468	2.22982	33.6454	3.13e-26	1.25e-22	49.7858	FBgn0030159	CG9689	CG9689	CG9689	31922	---	---	---	---
1339	142538_at	1.79988	1.97662	21.1907	3.5e-20	6.71e-18	36.0744	FBgn0063493	CG17531	GstE7	Glutathione S transferase E7	37112	4364 // glutathione transferase activity // inferred from sequence or structural similarity /// 4364 // glutathione transferase activity // inferred from sequence similarity	6800 // oxygen and reactive oxygen species metabolism // inferred from electronic annotation /// 6952 // defense response // inferred from electronic annotation /// 9636 // response to toxin // inferred from electronic annotation	---	IPR004046 // Glutathione S-transferase, C-terminal // 3.3E-13 /// IPR004045 // Glutathione S-transferase, N-terminal // 7.1E-20
11034	152233_at	1.75924	3.71597	23.1557	2.53e-21	6.11e-19	38.6958	FBgn0027657	CG9734	glob1	globin 1	41930	5344 // oxygen transporter activity // inferred from sequence or structural similarity /// 5386 // carrier activity // inferred from electronic annotation /// 5515 // protein binding // inferred from physical interaction /// 5344 // oxygen transporter activity // inferred from electronic annotation /// 5488 // binding // inferred from electronic annotation /// 5506 // iron ion binding // inferred…	15671 // oxygen transport // inferred from electronic annotation /// 6810 // transport // inferred from electronic annotation	---	IPR000971 // Globin // 8.7E-26 /// IPR000971 // Globin // 9.3E-4
9483	150682_at	1.73754	4.01201	15.0473	6.41e-16	3.97e-14	26.1897	---	CG14245 /// CG14246	---	---	---	---	---	---	---
2869	144068_at	1.73434	4.0017	11.49	8.64e-13	2.93e-11	18.8849	FBgn0025583	CG18106	IM2	Immune induced molecule 2	49802	---	6952 // defense response // inferred from direct assay /// 6952 // defense response // non-traceable author statement /// 6955 // immune response // inferred from electronic annotation /// 45087 // innate immune response // inferred from electronic annotation	5576 // extracellular region // inferred from direct assay /// 5576 // extracellular region // non-traceable author statement	---
4589	145788_at	1.71549	2.10562	19.1447	6.82e-19	8.93e-17	33.0955	FBgn0031643	CG3008	CG3008	CG3008	33693	4672 // protein kinase activity // non-traceable author statement /// 16301 // kinase activity // inferred from electronic annotation /// 16740 // transferase activity // inferred from electronic annotation	6468 // protein amino acid phosphorylation // inferred from electronic annotation	---	IPR000687 // Protein of unknown function RIO1 // 5.4E-107
3514	144713_at	1.7128	2.36608	9.73294	5.24e-11	1.23e-09	14.7201	FBgn0030060	CG2004	CG2004	CG2004	31809	16301 // kinase activity // inferred from electronic annotation /// 16740 // transferase activity // inferred from electronic annotation	---	---	IPR004119 // Protein of unknown function DUF227 // 2.4E-92
10790	151989_at	1.70668	4.18804	13.6988	8.4e-15	4.09e-13	23.584	FBgn0031645	CG3036	CG3036	CG3036	33695	5436 // sodium:phosphate symporter activity // inferred from sequence or structural similarity /// 5215 // transporter activity // inferred from electronic annotation /// 5436 // sodium:phosphate symporter activity // inferred from sequence similarity	5975 // carbohydrate metabolism // inferred from electronic annotation /// 6796 // phosphate metabolism // inferred from electronic annotation /// 6812 // cation transport // inferred from electronic annotation /// 6817 // phosphate transport // inferred from sequence or structural similarity /// 6858 // extracellular transport // inferred from electronic annotation /// 8643 // carbohydrate trans…	16021 // integral to membrane // inferred from sequence or structural similarity /// 16020 // membrane // inferred from electronic annotation /// 16021 // integral to membrane // inferred from electronic annotation /// 16021 // integral to membrane // inferred from sequence similarity	---
4031	145230_at	1.70418	2.92269	6.30452	4.86e-07	5.14e-06	5.48856	FBgn0030821	CG5010	CG5010	CG5010	32701	---	---	---	IPR010625 // CHCH // 8.7E-11
13945	155144_at	1.64559	3.79262	18.9678	8.92e-19	1.07e-16	32.8248	FBgn0041342	CG1049	Cct1	CTP:phosphocholine cytidylyltransferase 1	117353	4105 // choline-phosphate cytidylyltransferase activity // inferred from sequence or structural similarity /// 16779 // nucleotidyltransferase activity // inferred from electronic annotation /// 4105 // choline-phosphate cytidylyltransferase activity // inferred from sequence similarity	1654 // eye development // inferred from mutant phenotype /// 6644 // phospholipid metabolism // inferred from electronic annotation /// 6897 // endocytosis // inferred from mutant phenotype /// 7476 // wing morphogenesis // inferred from mutant phenotype /// 8340 // determination of adult life span // inferred from mutant phenotype /// 9058 // biosynthesis // inferred from electronic annotation …	---	IPR004820 // Cytidylyltransferase // 4.5E-30
6232	147431_at	1.64379	4.35395	8.20674	2.57e-09	4.32e-08	10.7779	FBgn0034329	CG18108	IM1	Immune induced molecule 1	37100	---	6952 // defense response // inferred from direct assay	5576 // extracellular region // inferred from direct assay	---
10639	151838_at	1.63911	3.18681	10.834	3.82e-12	1.16e-10	17.3763	FBgn0031263	CG2789	CG2789	CG2789	33231	5215 // transporter activity // inferred from electronic annotation /// 8503 // benzodiazepine receptor activity // inferred from sequence or structural similarity /// 8503 // benzodiazepine receptor activity // inferred from sequence similarity	6629 // lipid metabolism // inferred from electronic annotation /// 6732 // coenzyme metabolism // inferred from electronic annotation /// 6869 // lipid transport // inferred from electronic annotation /// 51189 // prosthetic group metabolism // inferred from electronic annotation	5740 // mitochondrial envelope // inferred from sequence or structural similarity /// 16021 // integral to membrane // inferred from electronic annotation /// 5740 // mitochondrial envelope // inferred from sequence similarity	IPR004307 // TspO/MBR-related protein // 2.3E-85
58	141257_at	1.63411	2.62587	16.0302	1.09e-16	8.07e-15	27.9766	FBgn0001142	CG2718	Gs1	Glutamine synthetase 1	33172	4356 // glutamate-ammonia ligase activity // inferred from direct assay /// 4356 // glutamate-ammonia ligase activity // inferred from sequence or structural similarity /// 4356 // glutamate-ammonia ligase activity // non-traceable author statement /// 15930 // glutamate synthase activity // non-traceable author statement /// 4356 // glutamate-ammonia ligase activity // inferred from electronic a…	6541 // glutamine metabolism // non-traceable author statement /// 8652 // amino acid biosynthesis // inferred from electronic annotation /// 9399 // nitrogen fixation // inferred from electronic annotation /// 6542 // glutamine biosynthesis // inferred from electronic annotation /// 6807 // nitrogen compound metabolism // inferred from electronic annotation	5739 // mitochondrion // inferred from direct assay /// 5739 // mitochondrion // non-traceable author statement /// 5739 // mitochondrion // inferred from electronic annotation	IPR008147 // Glutamine synthetase, beta-Grasp domain // 4.4E-32 /// IPR008146 // Glutamine synthetase, catalytic domain // 4.9E-109
11470	152669_at	1.62846	2.84327	16.0574	1.04e-16	7.78e-15	28.0249	FBgn0020385	CG4067	pug	pugilist	41279	4329 // formate-tetrahydrofolate ligase activity // inferred from sequence or structural similarity /// 4477 // methenyltetrahydrofolate cyclohydrolase activity // inferred from sequence or structural similarity /// 4488 // methylenetetrahydrofolate dehydrogenase (NADP+) activity // inferred from sequence or structural similarity /// 5524 // ATP binding // inferred from electronic annotation /// …	8652 // amino acid biosynthesis // inferred from electronic annotation /// 9396 // folic acid and derivative biosynthesis // inferred from electronic annotation /// 105 // histidine biosynthesis // inferred from electronic annotation /// 6164 // purine nucleotide biosynthesis // inferred from electronic annotation /// 6730 // one-carbon compound metabolism // inferred from electronic annotation /…	5737 // cytoplasm // inferred from direct assay	IPR000559 // Formate-tetrahydrofolate ligase, FTHFS // 1.0E-126 /// IPR000672 // Tetrahydrofolate dehydrogenase/cyclohydrolase // 1.0E-80 /// IPR000672 // Tetrahydrofolate dehydrogenase/cyclohydrolase // 4.0E-114 /// IPR000559 // Formate-tetrahydrofolate ligase, FTHFS // 1.0E-126 /// IPR000672 // Tetrahydrofolate dehydrogenase/cyclohydrolase // 1.0E-80 /// IPR000672 // Tetrahydrofolate dehydrogen…
10700	151899_at	1.60978	3.39059	13.2218	2.18e-14	9.77e-13	22.6165	FBgn0036992	CG11796	CG11796	CG11796	40263	3868 // 4-hydroxyphenylpyruvate dioxygenase activity // inferred from sequence or structural similarity /// 5515 // protein binding // inferred from physical interaction /// 3868 // 4-hydroxyphenylpyruvate dioxygenase activity // inferred from electronic annotation /// 3868 // 4-hydroxyphenylpyruvate dioxygenase activity // inferred from sequence similarity	9063 // amino acid catabolism // inferred from electronic annotation /// 9072 // aromatic amino acid family metabolism // inferred from electronic annotation	---	IPR004360 // Glyoxalase/Bleomycin resistance protein/dioxygenase domain // 1.9E-17 /// IPR004360 // Glyoxalase/Bleomycin resistance protein/dioxygenase domain // 1.9E-17
13592	154791_at	1.59936	3.15238	11.5377	7.77e-13	2.66e-11	18.9927	FBgn0031037	CG14207	CG14207	CG14207	32955	5515 // protein binding // inferred from physical interaction	---	---	IPR002068 // Heat shock protein Hsp20 // 2.4E-23 /// IPR002068 // Heat shock protein Hsp20 // 2.4E-23
1985	143184_at	1.58312	5.87748	12.4336	1.12e-13	4.32e-12	20.9619	FBgn0001149	CG10045	GstD1	Glutathione S transferase D1	41503	4364 // glutathione transferase activity // inferred from direct assay /// 4364 // glutathione transferase activity // inferred from sequence or structural similarity /// 4364 // glutathione transferase activity // non-traceable author statement /// 5515 // protein binding // inferred from physical interaction /// 4364 // glutathione transferase activity // inferred from electronic annotation ///…	6952 // defense response // inferred from electronic annotation /// 9636 // response to toxin // inferred from electronic annotation	---	IPR004046 // Glutathione S-transferase, C-terminal // 9.6E-17 /// IPR004045 // Glutathione S-transferase, N-terminal // 4.2E-21
11951	153150_at	1.57159	2.90208	18.7327	1.28e-18	1.46e-16	32.4615	FBgn0014427	CG11899	CG11899	CG11899	46391	4648 // phosphoserine transaminase activity // inferred from sequence or structural similarity /// 4648 // phosphoserine transaminase activity // non-traceable author statement /// 5515 // protein binding // inferred from physical interaction /// 8483 // transaminase activity // inferred from electronic annotation /// 4648 // phosphoserine transaminase activity // inferred from electronic annotat…	6564 // L-serine biosynthesis // non-traceable author statement /// 8615 // pyridoxine biosynthesis // non-traceable author statement /// 6564 // L-serine biosynthesis // inferred from electronic annotation /// 8152 // metabolism // inferred from electronic annotation /// 8652 // amino acid biosynthesis // inferred from electronic annotation	---	IPR000192 // Aminotransferase, class V // 1.6E-86
10012	151211_at	1.56598	5.93469	8.77516	5.82e-10	1.11e-08	12.281	FBgn0040736 /// FBgn0031035	CG16844	IM3 /// RpS10b	Immune induced molecule 3 /// Ribosomal protein S10b	32953 /// 50209	3676 // nucleic acid binding // inferred from electronic annotation /// 3735 // structural constituent of ribosome // inferred from sequence or structural similarity /// 3779 // actin binding // inferred from electronic annotation /// 5200 // structural constituent of cytoskeleton // inferred from electronic annotation /// 8017 // microtubule binding // inferred from electronic annotation /// 192…	6412 // protein biosynthesis // inferred from electronic annotation /// 7010 // cytoskeleton organization and biogenesis // inferred from electronic annotation /// 6952 // defense response // inferred from direct assay /// 8063 // Toll signaling pathway // non-traceable author statement /// 19731 // antibacterial humoral response // inferred from direct assay	5843 // cytosolic small ribosomal subunit (sensu Eukaryota) // inferred from sequence or structural similarity /// 5576 // extracellular region // inferred from direct assay /// 30529 // ribonucleoprotein complex // inferred from electronic annotation /// 5843 // cytosolic small ribosomal subunit (sensu Eukaryota) // inferred from sequence similarity	IPR005326 // Plectin/S10, N-terminal // 2.1E-77
8842	150041_at	1.56168	1.62642	20.4414	1.01e-19	1.68e-17	35.015	FBgn0038467	CG3590	CG3590	CG3590	42051	4018 // adenylosuccinate lyase activity // inferred from sequence or structural similarity /// 3824 // catalytic activity // inferred from electronic annotation /// 4018 // adenylosuccinate lyase activity // inferred from electronic annotation /// 16829 // lyase activity // inferred from electronic annotation /// 4018 // adenylosuccinate lyase activity // inferred from sequence similarity	6144 // purine base metabolism // inferred from electronic annotation /// 9152 // purine ribonucleotide biosynthesis // inferred from electronic annotation	---	IPR000362 // Fumarate lyase // 6.3E-70
11533	152732_at	1.56031	2.59607	23.7064	1.26e-21	3.27e-19	39.3929	FBgn0036997	CG5955	CG5955	CG5955	40268	3978 // UDP-glucose 4-epimerase activity // inferred from sequence or structural similarity /// 3824 // catalytic activity // inferred from electronic annotation /// 51287 // NAD binding // inferred from electronic annotation /// 3978 // UDP-glucose 4-epimerase activity // inferred from sequence similarity	9225 // nucleotide-sugar metabolism // inferred from electronic annotation	---	---
3322	144521_at	1.54326	3.06501	11.1875	1.7e-12	5.43e-11	18.1961	FBgn0029766	CG15784	CG15784	CG15784	31461	---	---	---	---
8556	149755_at	1.54072	3.31261	17.7109	6.44e-18	6.06e-16	30.8347	FBgn0038020	CG10091	GstD9	Glutathione S transferase D9	41502	4364 // glutathione transferase activity // inferred from direct assay /// 4364 // glutathione transferase activity // inferred from sequence or structural similarity /// 4364 // glutathione transferase activity // inferred from sequence similarity	6952 // defense response // inferred from electronic annotation /// 9636 // response to toxin // inferred from electronic annotation	---	IPR004046 // Glutathione S-transferase, C-terminal // 1.9E-13 /// IPR004045 // Glutathione S-transferase, N-terminal // 6.5E-22
2002	143201_at	1.52548	0.78775	21.8078	1.5e-20	3.18e-18	36.9214	FBgn0001258	CG10160	ImpL3	Ecdysone-inducible gene L3	45880	4459 // L-lactate dehydrogenase activity // inferred from sequence or structural similarity /// 4459 // L-lactate dehydrogenase activity // non-traceable author statement /// 4459 // L-lactate dehydrogenase activity // traceable author statement /// 5515 // protein binding // inferred from physical interaction /// 4459 // L-lactate dehydrogenase activity // inferred from electronic annotation ///…	6096 // glycolysis // non-traceable author statement /// 6100 // tricarboxylic acid cycle intermediate metabolism // inferred from electronic annotation /// 6096 // glycolysis // inferred from electronic annotation /// 19642 // anaerobic glycolysis // inferred from electronic annotation	5737 // cytoplasm // inferred from electronic annotation	IPR001236 // Lactate/malate dehydrogenase // 4.6E-61 /// IPR001236 // Lactate/malate dehydrogenase // 6.5E-71
12233	153432_at	1.4989	4.99825	12.4317	1.12e-13	4.32e-12	20.9578	FBgn0022073	CG8846	Thor	Thor	33569	8190 // eukaryotic initiation factor 4E binding // inferred from direct assay /// 8190 // eukaryotic initiation factor 4E binding // inferred from sequence or structural similarity /// 8190 // eukaryotic initiation factor 4E binding // non-traceable author statement /// 5515 // protein binding // inferred from physical interaction /// 8190 // eukaryotic initiation factor 4E binding // inferred fr…	1558 // regulation of cell growth // inferred from genetic interaction /// 1558 // regulation of cell growth // inferred from mutant phenotype /// 6950 // response to stress // inferred from expression pattern /// 6952 // defense response // non-traceable author statement /// 6955 // immune response // inferred from expression pattern /// 6955 // immune response // inferred from mutant phenotype …	---	IPR008606 // Eukaryotic translation initiation factor 4E binding // 1.0E-80
2670	143869_at	1.48302	3.6546	16.4462	5.31e-17	4.23e-15	28.7065	FBgn0016076	CG14029	vri	vrille	33759	3677 // DNA binding // inferred from electronic annotation /// 3702 // RNA polymerase II transcription factor activity // non-traceable author statement /// 30528 // transcription regulator activity // traceable author statement /// 42803 // protein homodimerization activity // inferred from sequence or structural similarity /// 46982 // protein heterodimerization activity // inferred from sequen…	6351 // transcription, DNA-dependent // non-traceable author statement /// 6355 // regulation of transcription, DNA-dependent // inferred from electronic annotation /// 7275 // development // traceable author statement /// 7622 // rhythmic behavior // traceable author statement /// 7623 // circadian rhythm // inferred from direct assay /// 7623 // circadian rhythm // non-traceable author statemen…	5634 // nucleus // non-traceable author statement /// 5634 // nucleus // inferred from electronic annotation	---
2406	143605_at	1.46644	3.91562	5.86031	1.73e-06	1.59e-05	4.21312	FBgn0010381	CG10810	Drs	Drosomycin	38419	8200 // ion channel inhibitor activity // inferred from electronic annotation	6952 // defense response // inferred from direct assay /// 6961 // antibacterial humoral response (sensu Protostomia) // traceable author statement /// 6966 // antifungal humoral response (sensu Protostomia) // inferred from expression pattern /// 6966 // antifungal humoral response (sensu Protostomia) // non-traceable author statement /// 9405 // pathogenesis // inferred from electronic annotati…	5576 // extracellular region // inferred from direct assay /// 5576 // extracellular region // inferred from electronic annotation	IPR008176 // Gamma thionin // 2.7E-19
13355	154554_at	1.46591	2.22303	17.1984	1.49e-17	1.32e-15	29.9881	FBgn0040237	CG6815	bor	belphegor	53565	166 // nucleotide binding // inferred from electronic annotation /// 5524 // ATP binding // inferred from electronic annotation /// 17111 // nucleoside-triphosphatase activity // inferred from electronic annotation	---	5737 // cytoplasm // non-traceable author statement	IPR003959 // AAA ATPase, central region // 4.5E-35
284	141483_at	1.452	3.26242	11.4307	9.86e-13	3.3e-11	18.7507	FBgn0038661	CG17836	CG17836	CG17836	42267	3677 // DNA binding // inferred from electronic annotation /// 46983 // protein dimerization activity // inferred from sequence or structural similarity /// 46983 // protein dimerization activity // inferred from sequence similarity	6355 // regulation of transcription, DNA-dependent // inferred from electronic annotation /// 50875 // cellular physiological process // inferred from mutant phenotype	5634 // nucleus // inferred from electronic annotation	---
1346	142545_at	1.44886	2.32481	18.8369	1.09e-18	1.27e-16	32.623	FBgn0010173	CG9633	RpA-70	Replication Protein A 70	40972	3697 // single-stranded DNA binding // inferred from direct assay /// 3697 // single-stranded DNA binding // non-traceable author statement /// 3676 // nucleic acid binding // inferred from electronic annotation /// 3677 // DNA binding // inferred from electronic annotation /// 8270 // zinc ion binding // inferred from electronic annotation /// 46872 // metal ion binding // inferred from electron…	6261 // DNA-dependent DNA replication // inferred from direct assay /// 6261 // DNA-dependent DNA replication // non-traceable author statement /// 6260 // DNA replication // inferred from electronic annotation	5634 // nucleus // inferred from direct assay /// 5634 // nucleus // non-traceable author statement /// 5662 // DNA replication factor A complex // inferred from direct assay /// 5662 // DNA replication factor A complex // non-traceable author statement /// 5634 // nucleus // inferred from electronic annotation	IPR004365 // OB-fold nucleic acid binding domain // 4.5E-17 /// IPR007199 // Replication factor-A protein 1, N-terminal // 3.6E-53
7463	148662_at	1.43511	1.99986	20.7603	6.39e-20	1.11e-17	35.4701	FBgn0036290	CG10638	CG10638	CG10638	39424	4032 // aldehyde reductase activity // inferred from sequence or structural similarity /// 16491 // oxidoreductase activity // inferred from electronic annotation /// 4032 // aldehyde reductase activity // inferred from sequence similarity	6081 // aldehyde metabolism // inferred from sequence or structural similarity /// 6081 // aldehyde metabolism // inferred from sequence similarity	---	IPR001395 // Aldo/keto reductase // 1.0E-126
13794	154993_at	1.43355	1.80898	20.2574	1.31e-19	2.14e-17	34.7494	FBgn0037447	CG2330	CG2330	CG2330	40796	5198 // structural molecule activity // inferred from electronic annotation /// 5201 // extracellular matrix structural constituent // inferred from electronic annotation	1501 // skeletal development // inferred from electronic annotation /// 7275 // development // inferred from electronic annotation /// 7398 // ectoderm development // inferred from electronic annotation /// 7399 // nervous system development // inferred from electronic annotation /// 7498 // mesoderm development // inferred from electronic annotation	---	IPR008709 // Neurochondrin // 1.0E-126
5509	146708_at	1.40682	3.52523	15.0927	5.89e-16	3.69e-14	26.2743	FBgn0029507	CG12846	Tsp42Ed	Tetraspanin 42Ed	35613	---	---	16021 // integral to membrane // inferred from sequence or structural similarity /// 16021 // integral to membrane // inferred from electronic annotation /// 16021 // integral to membrane // inferred from sequence similarity	IPR000301 // CD9/CD37/CD63 antigen // 1.4E-59
6495	147694_at	1.40162	1.48246	24.8017	3.25e-22	1.11e-19	40.734	FBgn0034756	CG4373	Cyp6d2	Cyp6d2	37594	4497 // monooxygenase activity // inferred from electronic annotation /// 16491 // oxidoreductase activity // inferred from electronic annotation /// 5506 // iron ion binding // inferred from electronic annotation /// 16712 // oxidoreductase activity, acting on paired donors, with incorporation or reduction of molecular oxygen, reduced flavin or flavoprotein as one donor, and incorporation of one…	6118 // electron transport // inferred from electronic annotation /// 8202 // steroid metabolism // inferred from electronic annotation	5792 // microsome // non-traceable author statement /// 16020 // membrane // non-traceable author statement /// 5783 // endoplasmic reticulum // inferred from electronic annotation /// 5792 // microsome // inferred from electronic annotation /// 16020 // membrane // inferred from electronic annotation	IPR001128 // Cytochrome P450 // 2.0E-74
11945	153144_at	1.38302	3.20177	11.4564	9.31e-13	3.14e-11	18.8089	FBgn0014455	CG11654	Ahcy13	Adenosylhomocysteinase at 13	32471	4013 // adenosylhomocysteinase activity // inferred from sequence or structural similarity /// 4013 // adenosylhomocysteinase activity // non-traceable author statement /// 4013 // adenosylhomocysteinase activity // inferred from electronic annotation /// 16787 // hydrolase activity // inferred from electronic annotation /// 4013 // adenosylhomocysteinase activity // inferred from sequence simila…	6144 // purine base metabolism // inferred from electronic annotation /// 6730 // one-carbon compound metabolism // inferred from electronic annotation	---	IPR000043 // S-adenosyl-L-homocysteine hydrolase // 2.6E-116 /// IPR000043 // S-adenosyl-L-homocysteine hydrolase // 7.9E-88 /// IPR000043 // S-adenosyl-L-homocysteine hydrolase // 6.4E-69
5748	146947_at	1.37461	0.462352	13.2173	2.2e-14	9.82e-13	22.6073	FBgn0033519	CG11825	CG11825	CG11825	36099	---	---	---	IPR007667 // Hypoxia induced protein conserved region // 2.3E-35
6486	147685_at	1.37363	0.889156	8.74806	6.24e-10	1.18e-08	12.2103	FBgn0034741	CG4269	CG4269	CG4269	37578	---	---	---	---
322	141521_at	1.37243	2.2694	19.6327	3.28e-19	4.83e-17	33.8313	FBgn0051864 /// FBgn0032391	CG5202 /// CG31864	CG31864 /// escl	CG31864 /// escl	318990 /// 34611	5515 // protein binding // non-traceable author statement /// 30528 // transcription regulator activity // inferred from electronic annotation	6139 // nucleobase, nucleoside, nucleotide and nucleic acid metabolism // inferred from electronic annotation /// 6357 // regulation of transcription from RNA polymerase II promoter // inferred from electronic annotation /// 6366 // transcription from RNA polymerase II promoter // inferred from electronic annotation /// 7165 // signal transduction // inferred from electronic annotation /// 7166 /…	5700 // polytene chromosome // non-traceable author statement	IPR001680 // G-protein beta WD-40 repeat // 0.18 /// IPR001680 // G-protein beta WD-40 repeat // 1.1 /// IPR001680 // G-protein beta WD-40 repeat // 2.9E-10 /// IPR001680 // G-protein beta WD-40 repeat // 4.2E-5 /// IPR001680 // G-protein beta WD-40 repeat // 0.39 /// IPR001680 // G-protein beta WD-40 repeat // 0.0021
9549	150748_at	1.36962	1.23153	25.6751	1.15e-22	4.52e-20	41.7627	FBgn0039544	CG12877	CG12877	CG12877	43333	3676 // nucleic acid binding // inferred from electronic annotation /// 4518 // nuclease activity // inferred from electronic annotation /// 4532 // exoribonuclease activity // inferred from electronic annotation /// 4527 // exonuclease activity // inferred from electronic annotation /// 16787 // hydrolase activity // inferred from electronic annotation	6139 // nucleobase, nucleoside, nucleotide and nucleic acid metabolism // inferred from electronic annotation	5622 // intracellular // inferred from electronic annotation /// 5634 // nucleus // inferred from electronic annotation	IPR006055 // Exonuclease // 5.6E-11 /// IPR006055 // Exonuclease // 1.1E-14 /// IPR006055 // Exonuclease // 5.6E-11 /// IPR006055 // Exonuclease // 1.1E-14
7351	148550_at	1.36806	2.29923	21.1016	3.96e-20	7.49e-18	35.9503	FBgn0036126	CG6272	CG6272	CG6272	39243	3677 // DNA binding // inferred from electronic annotation /// 46982 // protein heterodimerization activity // inferred from sequence or structural similarity /// 43565 // sequence-specific DNA binding // inferred from electronic annotation /// 46983 // protein dimerization activity // inferred from electronic annotation /// 46982 // protein heterodimerization activity // inferred from sequence s…	6355 // regulation of transcription, DNA-dependent // inferred from electronic annotation	5634 // nucleus // inferred from electronic annotation	---
11902	153101_at	1.35103	1.19407	18.59	1.6e-18	1.78e-16	32.2389	FBgn0034648	CG15675	CG15675	CG15675	37469	---	---	---	---
6231	147430_at	1.33022	0.660906	4.37501	0.000124448	0.000729505	-0.0352029	FBgn0034328	CG15066	IM23	Immune induced molecule 23	37099	---	6952 // defense response // inferred from direct assay /// 8063 // Toll signaling pathway // non-traceable author statement /// 19731 // antibacterial humoral response // inferred from direct assay /// 6955 // immune response // inferred from electronic annotation /// 45087 // innate immune response // inferred from electronic annotation	5576 // extracellular region // inferred from direct assay	---
931	142130_at	1.32986	0.641695	17.7385	6.16e-18	5.83e-16	30.8797	FBgn0050443	CG30443	CG30443	CG30443	246618	3676 // nucleic acid binding // inferred from electronic annotation /// 8270 // zinc ion binding // inferred from electronic annotation /// 30528 // transcription regulator activity // inferred from electronic annotation /// 46872 // metal ion binding // inferred from electronic annotation	6139 // nucleobase, nucleoside, nucleotide and nucleic acid metabolism // inferred from electronic annotation /// 6357 // regulation of transcription from RNA polymerase II promoter // inferred from electronic annotation /// 6366 // transcription from RNA polymerase II promoter // inferred from electronic annotation /// 8283 // cell proliferation // inferred from electronic annotation	5634 // nucleus // inferred from electronic annotation	IPR007087 // Zn-finger, C2H2 type // 5.7E-7 /// IPR007087 // Zn-finger, C2H2 type // 5.7E-5 /// IPR007087 // Zn-finger, C2H2 type // 2.5E-5
3362	144561_at	1.32869	2.08364	10.5811	6.88e-12	1.97e-10	16.7801	FBgn0029823	CG3011	CG3011	CG3011	31524	4372 // glycine hydroxymethyltransferase activity // inferred from sequence or structural similarity /// 5515 // protein binding // inferred from physical interaction /// 4372 // glycine hydroxymethyltransferase activity // inferred from electronic annotation /// 4372 // glycine hydroxymethyltransferase activity // inferred from sequence similarity	6139 // nucleobase, nucleoside, nucleotide and nucleic acid metabolism // inferred from electronic annotation /// 6544 // glycine metabolism // inferred from electronic annotation /// 6564 // L-serine biosynthesis // inferred from sequence or structural similarity /// 6563 // L-serine metabolism // inferred from electronic annotation /// 6564 // L-serine biosynthesis // inferred from sequence sim…	5739 // mitochondrion // inferred from sequence or structural similarity /// 5739 // mitochondrion // inferred from sequence similarity	IPR001085 // Glycine hydroxymethyltransferase // 1.0E-126
13471	154670_at	1.31928	1.33346	17.2011	1.49e-17	1.32e-15	29.9927	FBgn0031881	CG3476	CG3476	CG3476	33987	5386 // carrier activity // inferred from sequence or structural similarity /// 5476 // carnitine:acyl carnitine antiporter activity // inferred from sequence or structural similarity /// 5488 // binding // inferred from electronic annotation /// 15226 // carnitine transporter activity // inferred from sequence or structural similarity /// 15227 // acyl carnitine transporter activity // inferred …	6629 // lipid metabolism // inferred from electronic annotation /// 6839 // mitochondrial transport // inferred from sequence or structural similarity /// 6844 // acyl carnitine transport // inferred from sequence or structural similarity /// 6869 // lipid transport // inferred from electronic annotation /// 15879 // carnitine transport // inferred from sequence or structural similarity /// 6810 …	5740 // mitochondrial envelope // inferred from sequence or structural similarity /// 5743 // mitochondrial inner membrane // inferred from sequence or structural similarity /// 5743 // mitochondrial inner membrane // inferred from electronic annotation /// 16020 // membrane // inferred from electronic annotation /// 16021 // integral to membrane // inferred from electronic annotation /// 5740 //…	IPR001993 // Mitochondrial substrate carrier // 1.7E-37 /// IPR001993 // Mitochondrial substrate carrier // 1.4E-31 /// IPR001993 // Mitochondrial substrate carrier // 5.2E-24
6370	147569_at	1.30805	2.06807	27.7096	1.16e-23	5.63e-21	44.0306	FBgn0068819 /// FBgn0075698	CG30152	DmirCG10404 /// DpseGA15681	CG10404 /// GA15681	---	---	---	---	IPR002744 // Protein of unknown function DUF59 // 4.1E-10
12911	154110_at	1.29553	3.73732	13.6098	1e-14	4.84e-13	23.4053	FBgn0035811	CG12262	CG12262	CG12262	38864	3995 // acyl-CoA dehydrogenase activity // inferred from sequence or structural similarity /// 5515 // protein binding // inferred from physical interaction /// 3995 // acyl-CoA dehydrogenase activity // inferred from electronic annotation /// 16491 // oxidoreductase activity // inferred from electronic annotation /// 3995 // acyl-CoA dehydrogenase activity // inferred from sequence similarity	6118 // electron transport // inferred from electronic annotation /// 6635 // fatty acid beta-oxidation // inferred from sequence or structural similarity /// 6637 // acyl-CoA metabolism // inferred from electronic annotation /// 6629 // lipid metabolism // inferred from electronic annotation /// 6631 // fatty acid metabolism // inferred from electronic annotation /// 6635 // fatty acid beta-oxid…	5739 // mitochondrion // inferred from sequence or structural similarity /// 5759 // mitochondrial matrix // inferred from sequence or structural similarity /// 5739 // mitochondrion // inferred from electronic annotation /// 5739 // mitochondrion // inferred from sequence similarity /// 5759 // mitochondrial matrix // inferred from sequence similarity	IPR006090 // Acyl-CoA dehydrogenase, C-terminal // 1.3E-76 /// IPR006091 // Acyl-CoA dehydrogenase, central domain // 2.5E-66 /// IPR006092 // Acyl-CoA dehydrogenase, N-terminal // 1.9E-40
12532	153731_at	1.28777	2.44948	8.40282	1.53e-09	2.68e-08	11.301	FBgn0001225	CG4183	Hsp26	Heat shock protein 26	39075	---	6457 // protein folding // inferred from electronic annotation /// 6952 // defense response // inferred from electronic annotation /// 8340 // determination of adult life span // inferred from mutant phenotype /// 9408 // response to heat // inferred from sequence or structural similarity /// 9408 // response to heat // non-traceable author statement /// 6986 // response to unfolded protein // in…	---	IPR002068 // Heat shock protein Hsp20 // 6.6E-47
11535	152734_at	1.28459	3.02101	18.6242	1.51e-18	1.7e-16	32.2925	FBgn0028940	CG8864	Cyp28a5	Cyp28a5	34817	4497 // monooxygenase activity // inferred from electronic annotation /// 16491 // oxidoreductase activity // inferred from electronic annotation /// 5506 // iron ion binding // inferred from electronic annotation /// 20037 // heme binding // inferred from electronic annotation /// 46872 // metal ion binding // inferred from electronic annotation	6118 // electron transport // inferred from electronic annotation /// 8202 // steroid metabolism // inferred from electronic annotation	5792 // microsome // non-traceable author statement /// 16020 // membrane // non-traceable author statement /// 5783 // endoplasmic reticulum // inferred from electronic annotation /// 5792 // microsome // inferred from electronic annotation /// 16020 // membrane // inferred from electronic annotation	IPR001128 // Cytochrome P450 // 1.9E-68
10635	151834_at	1.28311	3.33199	8.97541	3.48e-10	6.98e-09	12.8008	FBgn0052130	CG32130	CG32130	CG32130	39518	4263 // chymotrypsin activity // inferred from electronic annotation /// 4295 // trypsin activity // inferred from electronic annotation /// 5515 // protein binding // inferred from electronic annotation /// 5515 // protein binding // inferred from physical interaction /// 4252 // serine-type endopeptidase activity // inferred from electronic annotation /// 8233 // peptidase activity // inferred …	6508 // proteolysis // inferred from electronic annotation /// 6915 // apoptosis // inferred from electronic annotation	---	IPR003103 // Apoptosis regulator Bcl-2 protein, BAG // 1.4E-17 /// IPR003103 // Apoptosis regulator Bcl-2 protein, BAG // 1.4E-17 /// IPR003103 // Apoptosis regulator Bcl-2 protein, BAG // 1.4E-17
5558	146757_at	1.27958	1.4887	8.50924	1.16e-09	2.08e-08	11.5829	FBgn0033204	CG2065	CG2065	CG2065	35707	16491 // oxidoreductase activity // inferred from electronic annotation	8152 // metabolism // inferred from electronic annotation	---	IPR002198 // Short-chain dehydrogenase/reductase SDR // 2.1E-35
7468	148667_at	1.2683	1.20046	26.5929	4e-23	1.75e-20	42.8073	FBgn0036297	CG14121	CG14121	CG14121	39432	---	---	---	---
11084	152283_at	1.2522	2.70089	3.67803	0.000872687	0.00383151	-1.93773	FBgn0052549	CG32549	CG32549	CG32549	32822	8253 // 5'-nucleotidase activity // inferred from sequence or structural similarity /// 8253 // 5'-nucleotidase activity // inferred from sequence similarity	6139 // nucleobase, nucleoside, nucleotide and nucleic acid metabolism // inferred from sequence or structural similarity /// 6144 // purine base metabolism // inferred from electronic annotation /// 6139 // nucleobase, nucleoside, nucleotide and nucleic acid metabolism // inferred from sequence similarity	5829 // cytosol // inferred from sequence or structural similarity /// 5829 // cytosol // inferred from sequence similarity	IPR008380 // Purine 5-nucleotidase // 1.0E-126 /// IPR008380 // Purine 5-nucleotidase // 1.0E-126 /// IPR008380 // Purine 5-nucleotidase // 1.0E-126 /// IPR008380 // Purine 5-nucleotidase // 1.0E-126 /// IPR008380 // Purine 5-nucleotidase // 1.0E-126
11853	153052_at	1.23332	2.64213	14.6234	1.41e-15	7.91e-14	25.3905	FBgn0039296	CG10420	CG10420	CG10420	43034	5488 // binding // inferred from electronic annotation	6605 // protein targeting // inferred from electronic annotation /// 6810 // transport // inferred from electronic annotation /// 15031 // protein transport // inferred from electronic annotation	5783 // endoplasmic reticulum // inferred from electronic annotation	---
616	141815_at	1.22704	3.74945	22.5924	5.26e-21	1.19e-18	37.9664	FBgn0035438	CG12013	PHGPx	PHGPx	38413	4601 // peroxidase activity // inferred from direct assay /// 4602 // glutathione peroxidase activity // inferred from sequence or structural similarity /// 5515 // protein binding // inferred from physical interaction /// 4601 // peroxidase activity // inferred from electronic annotation /// 4602 // glutathione peroxidase activity // inferred from electronic annotation /// 16491 // oxidoreductas…	6952 // defense response // inferred from electronic annotation /// 6982 // response to lipid hydroperoxide // inferred from sequence or structural similarity /// 8202 // steroid metabolism // inferred from electronic annotation /// 9636 // response to toxin // inferred from electronic annotation /// 6979 // response to oxidative stress // inferred from electronic annotation /// 6982 // response …	5737 // cytoplasm // inferred from sequence or structural similarity /// 5739 // mitochondrion // inferred from sequence or structural similarity /// 5737 // cytoplasm // inferred from sequence similarity /// 5739 // mitochondrion // inferred from sequence similarity	IPR000889 // Glutathione peroxidase // 6.4E-48 /// IPR000889 // Glutathione peroxidase // 6.4E-48 /// IPR000889 // Glutathione peroxidase // 6.4E-48
5065	146264_s_at	1.22475	1.67561	6.22914	6.02e-07	6.23e-06	5.27272	FBgn0051864 /// FBgn0032393	CG31864 /// CG12264	CG31864 /// CG12264	CG31864 /// CG12264	318990 /// 34613	4123 // cystathionine gamma-lyase activity // inferred from sequence or structural similarity /// 4123 // cystathionine gamma-lyase activity // non-traceable author statement /// 8483 // transaminase activity // inferred from electronic annotation /// 16740 // transferase activity // inferred from electronic annotation /// 31071 // cysteine desulfurase activity // inferred from electronic annotat…	6523 // alanine biosynthesis // inferred from sequence or structural similarity /// 16226 // iron-sulfur cluster assembly // inferred from sequence or structural similarity /// 16226 // iron-sulfur cluster assembly // non-traceable author statement /// 19740 // nitrogen utilization // inferred from electronic annotation /// 8152 // metabolism // inferred from electronic annotation /// 6523 // ala…	5737 // cytoplasm // inferred from sequence or structural similarity /// 5739 // mitochondrion // inferred from sequence or structural similarity /// 5739 // mitochondrion // non-traceable author statement /// 5739 // mitochondrion // inferred from electronic annotation /// 5737 // cytoplasm // inferred from sequence similarity /// 5739 // mitochondrion // inferred from sequence similarity	IPR000192 // Aminotransferase, class V // 1.0E-126
2072	143271_at	1.22464	4.25545	12.1057	2.25e-13	8.32e-12	20.2523	FBgn0002789	CG4696	Mp20	Muscle protein 20	36468	3779 // actin binding // inferred from sequence or structural similarity /// 5200 // structural constituent of cytoskeleton // inferred from electronic annotation /// 5509 // calcium ion binding // inferred from sequence or structural similarity /// 5515 // protein binding // inferred from physical interaction /// 3779 // actin binding // inferred from sequence similarity /// 5509 // calcium ion …	6936 // muscle contraction // inferred from electronic annotation /// 7155 // cell adhesion // inferred from mutant phenotype /// 7517 // muscle development // inferred from electronic annotation /// 8360 // regulation of cell shape // inferred from mutant phenotype	43292 // contractile fiber // non-traceable author statement	IPR001715 // Calponin-like actin-binding // 1.2E-21 /// IPR000557 // Calponin repeat // 2.5E-6
8023	149222_at	1.21586	1.19755	11.29	1.35e-12	4.41e-11	18.4307	FBgn0037151	CG7130	CG7130	CG7130	40450	42623 // ATPase activity, coupled // inferred from electronic annotation /// 51082 // unfolded protein binding // inferred from electronic annotation	6457 // protein folding // inferred from electronic annotation /// 6950 // response to stress // inferred from electronic annotation /// 6952 // defense response // inferred from electronic annotation /// 9408 // response to heat // inferred from sequence or structural similarity /// 9408 // response to heat // inferred from sequence similarity	---	IPR001623 // Heat shock protein DnaJ, N-terminal // 9.4E-33
990	142189_at	1.21051	2.03423	18.2281	2.82e-18	2.95e-16	31.668	FBgn0013772	CG10248	Cyp6a8	Cytochrome P450-6a8	36666	4497 // monooxygenase activity // inferred from electronic annotation /// 8393 // fatty acid (omega-1)-hydroxylase activity // inferred from direct assay /// 16491 // oxidoreductase activity // inferred from electronic annotation /// 5506 // iron ion binding // inferred from electronic annotation /// 20037 // heme binding // inferred from electronic annotation /// 46872 // metal ion binding // in…	6118 // electron transport // inferred from electronic annotation /// 8202 // steroid metabolism // inferred from electronic annotation /// 17143 // insecticide metabolism // inferred from direct assay /// 48252 // lauric acid metabolism // inferred from direct assay	5792 // microsome // non-traceable author statement /// 16020 // membrane // non-traceable author statement /// 5783 // endoplasmic reticulum // inferred from electronic annotation /// 5792 // microsome // inferred from electronic annotation /// 16020 // membrane // inferred from electronic annotation	IPR001128 // Cytochrome P450 // 2.4E-126
12724	153923_at	1.20838	1.37444	19.5643	3.63e-19	5.19e-17	33.7292	FBgn0026737	CG6171	CG6171	CG6171	41872	---	---	---	---
11515	152714_at	1.20297	1.1878	16.9369	2.31e-17	2e-15	29.5479	FBgn0037975	CG3397	CG3397	CG3397	41454	16491 // oxidoreductase activity // inferred from sequence or structural similarity /// 5515 // protein binding // inferred from physical interaction /// 16491 // oxidoreductase activity // inferred from electronic annotation /// 16491 // oxidoreductase activity // inferred from sequence similarity	6813 // potassium ion transport // inferred from sequence or structural similarity /// 6813 // potassium ion transport // inferred from sequence similarity	8076 // voltage-gated potassium channel complex // inferred from sequence or structural similarity /// 8076 // voltage-gated potassium channel complex // inferred from sequence similarity	IPR001395 // Aldo/keto reductase // 2.7E-25
13856	155055_at	1.19711	1.99735	16.1893	8.29e-17	6.41e-15	28.2576	FBgn0051549	CG31549	CG31549	CG31549	40689	16491 // oxidoreductase activity // inferred from sequence or structural similarity /// 5515 // protein binding // inferred from physical interaction /// 16491 // oxidoreductase activity // inferred from electronic annotation /// 16491 // oxidoreductase activity // inferred from sequence similarity	6629 // lipid metabolism // inferred from electronic annotation /// 8152 // metabolism // inferred from electronic annotation	---	IPR002198 // Short-chain dehydrogenase/reductase SDR // 1.2E-78
4805	146004_at	1.1957	2.71836	10.8817	3.42e-12	1.05e-10	17.4879	FBgn0031977	CG7380	CG7380	CG7380	34095	3677 // DNA binding // non-traceable author statement /// 5515 // protein binding // inferred from physical interaction /// 3677 // DNA binding // inferred from electronic annotation	---	5634 // nucleus // non-traceable author statement /// 5634 // nucleus // inferred from electronic annotation	IPR004122 // Barrier to autointegration factor, BAF // 5.1E-90
6410	147609_at	1.19536	1.6909	18.1526	3.18e-18	3.25e-16	31.5476	FBgn0034605	CG15661	CG15661	CG15661	37421	15020 // glucuronosyltransferase activity // inferred from sequence or structural similarity /// 16740 // transferase activity // inferred from electronic annotation /// 16757 // transferase activity, transferring glycosyl groups // inferred from electronic annotation /// 16758 // transferase activity, transferring hexosyl groups // inferred from electronic annotation /// 15020 // glucuronosyltra…	5976 // polysaccharide metabolism // inferred from electronic annotation /// 6952 // defense response // inferred from electronic annotation /// 8202 // steroid metabolism // inferred from electronic annotation /// 9636 // response to toxin // inferred from electronic annotation /// 8152 // metabolism // inferred from electronic annotation	---	IPR002213 // UDP-glucoronosyl/UDP-glucosyl transferase // 9.9E-74
12137	153336_at	1.19453	2.8488	13.6409	9.42e-15	4.57e-13	23.4679	FBgn0002069	CG3821	Aats-asp	Aspartyl-tRNA synthetase	36420	3729 // mRNA binding // inferred from electronic annotation /// 4815 // aspartate-tRNA ligase activity // inferred from sequence or structural similarity /// 5524 // ATP binding // inferred from electronic annotation /// 5515 // protein binding // inferred from physical interaction /// 3676 // nucleic acid binding // inferred from electronic annotation /// 4812 // aminoacyl-tRNA ligase activity /…	6422 // aspartyl-tRNA aminoacylation // inferred from sequence or structural similarity /// 40007 // growth // inferred from mutant phenotype /// 6418 // tRNA aminoacylation for protein translation // inferred from electronic annotation /// 6422 // aspartyl-tRNA aminoacylation // inferred from electronic annotation /// 6422 // aspartyl-tRNA aminoacylation // inferred from sequence similarity	5737 // cytoplasm // inferred from electronic annotation	IPR004365 // OB-fold nucleic acid binding domain // 3.7E-14 /// IPR004364 // tRNA synthetase, class II (D, K and N) // 1.0E-126
10859	152058_at	1.19224	3.69421	8.48731	1.23e-09	2.19e-08	11.5249	FBgn0003261	CG10279	Rm62	Rm62	40739	3729 // mRNA binding // inferred from sequence or structural similarity /// 4004 // ATP-dependent RNA helicase activity // inferred from sequence or structural similarity /// 4004 // ATP-dependent RNA helicase activity // non-traceable author statement /// 5515 // protein binding // inferred from physical interaction /// 5524 // ATP binding // inferred from electronic annotation /// 8026 // ATP-d…	381 // regulation of alternative nuclear mRNA splicing, via spliceosome // inferred from mutant phenotype /// 16246 // RNA interference // inferred from mutant phenotype /// 6417 // regulation of protein biosynthesis // inferred from electronic annotation /// 6445 // regulation of translation // inferred from electronic annotation	5634 // nucleus // Unknown /// 5634 // nucleus // inferred from electronic annotation /// 5634 // nucleus // inferred from curator	IPR001650 // Helicase, C-terminal // 2.5E-36 /// IPR001410 // DEAD/DEAH box helicase // 9.0E-83 /// IPR001650 // Helicase, C-terminal // 2.5E-36 /// IPR001410 // DEAD/DEAH box helicase // 9.0E-83 /// IPR001650 // Helicase, C-terminal // 2.5E-36 /// IPR001410 // DEAD/DEAH box helicase // 9.0E-83
2510	143709_at	1.18939	3.91174	17.94	4.46e-18	4.34e-16	31.2063	FBgn0013348	CG2981	TpnC41C	Troponin C at 41C	35473	5509 // calcium ion binding // inferred from sequence or structural similarity /// 5509 // calcium ion binding // non-traceable author statement /// 5516 // calmodulin binding // inferred from electronic annotation /// 5515 // protein binding // inferred from physical interaction /// 5509 // calcium ion binding // inferred from electronic annotation /// 5509 // calcium ion binding // inferred fro…	6936 // muscle contraction // inferred from electronic annotation /// 19722 // calcium-mediated signaling // inferred from electronic annotation	---	IPR002048 // Calcium-binding EF-hand // 0.0095 /// IPR002048 // Calcium-binding EF-hand // 9.5E-7 /// IPR002048 // Calcium-binding EF-hand // 3.8E-6 /// IPR002048 // Calcium-binding EF-hand // 1.2E-7
11155	152354_at	1.17075	2.48728	11.6429	6.16e-13	2.13e-11	19.2289	FBgn0039714	CG7816	CG7816	CG7816	43533	46873 // metal ion transporter activity // inferred from electronic annotation	30001 // metal ion transport // inferred from electronic annotation	16021 // integral to membrane // non-traceable author statement /// 16020 // membrane // inferred from electronic annotation	IPR003689 // Zinc transporter ZIP // 3.5E-102
6245	147444_at	1.16439	1.23996	18.269	2.64e-18	2.78e-16	31.7329	FBgn0034356	CG10924	CG10924	CG10924	37130	4613 // phosphoenolpyruvate carboxykinase (GTP) activity // inferred from sequence or structural similarity /// 5215 // transporter activity // inferred from electronic annotation /// 5525 // GTP binding // inferred from electronic annotation /// 5515 // protein binding // inferred from physical interaction /// 4611 // phosphoenolpyruvate carboxykinase activity // inferred from electronic annotat…	6094 // gluconeogenesis // inferred from sequence or structural similarity /// 6810 // transport // inferred from electronic annotation /// 6094 // gluconeogenesis // inferred from electronic annotation /// 6094 // gluconeogenesis // inferred from sequence similarity	5739 // mitochondrion // inferred from sequence or structural similarity /// 5739 // mitochondrion // inferred from sequence similarity	IPR008209 // Phosphoenolpyruvate carboxykinase (GTP) // 1.0E-126
1999	143198_at	1.15869	4.46284	8.7016	7.03e-10	1.32e-08	12.0888	FBgn0001233	CG1242	Hsp83	Heat shock protein 83	38389	5524 // ATP binding // inferred from electronic annotation /// 42623 // ATPase activity, coupled // inferred from sequence or structural similarity /// 51082 // unfolded protein binding // inferred from electronic annotation /// 5515 // protein binding // inferred from physical interaction /// 166 // nucleotide binding // inferred from electronic annotation /// 42623 // ATPase activity, coupled /…	6457 // protein folding // inferred from sequence or structural similarity /// 6457 // protein folding // traceable author statement /// 6461 // protein complex assembly // inferred from electronic annotation /// 6952 // defense response // inferred from electronic annotation /// 7015 // actin filament organization // inferred from mutant phenotype /// 7098 // centrosome cycle // inferred from mu…	5737 // cytoplasm // inferred from sequence or structural similarity /// 5737 // cytoplasm // non-traceable author statement /// 5813 // centrosome // inferred from direct assay /// 5813 // centrosome // inferred from sequence or structural similarity /// 5737 // cytoplasm // inferred from sequence similarity	IPR001404 // Heat shock protein Hsp90 // 1.0E-126 /// IPR003594 // ATP-binding region, ATPase-like // 6.0E-18
13296	154495_at	1.15601	2.21056	16.1487	8.89e-17	6.81e-15	28.1861	FBgn0034259	CG6459	CG6459	CG6459	37006	5515 // protein binding // inferred from physical interaction	42742 // defense response to bacteria // inferred from electronic annotation	5739 // mitochondrion // inferred from sequence or structural similarity /// 5759 // mitochondrial matrix // inferred from sequence or structural similarity /// 5759 // mitochondrial matrix // inferred from electronic annotation /// 5739 // mitochondrion // inferred from sequence similarity /// 5759 // mitochondrial matrix // inferred from sequence similarity	IPR003428 // Mitochondrial glycoprotein // 2.8E-23
12916	154115_at	1.15346	2.59596	20.1874	1.45e-19	2.34e-17	34.6479	FBgn0032393	CG12264	CG12264	CG12264	34613	4123 // cystathionine gamma-lyase activity // inferred from sequence or structural similarity /// 4123 // cystathionine gamma-lyase activity // non-traceable author statement /// 8483 // transaminase activity // inferred from electronic annotation /// 16740 // transferase activity // inferred from electronic annotation /// 31071 // cysteine desulfurase activity // inferred from electronic annotat…	6523 // alanine biosynthesis // inferred from sequence or structural similarity /// 16226 // iron-sulfur cluster assembly // inferred from sequence or structural similarity /// 16226 // iron-sulfur cluster assembly // non-traceable author statement /// 19740 // nitrogen utilization // inferred from electronic annotation /// 8152 // metabolism // inferred from electronic annotation /// 6523 // ala…	5737 // cytoplasm // inferred from sequence or structural similarity /// 5739 // mitochondrion // inferred from sequence or structural similarity /// 5739 // mitochondrion // non-traceable author statement /// 5739 // mitochondrion // inferred from electronic annotation /// 5737 // cytoplasm // inferred from sequence similarity /// 5739 // mitochondrion // inferred from sequence similarity	IPR000192 // Aminotransferase, class V // 1.0E-126
10605	151804_at	1.15032	5.26271	19.9709	1.99e-19	3.13e-17	34.3315	FBgn0037637	CG9836	CG9836	CG9836	41059	5515 // protein binding // inferred from physical interaction	6807 // nitrogen compound metabolism // inferred from electronic annotation /// 19740 // nitrogen utilization // inferred from electronic annotation	---	IPR002871 // Nitrogen-fixing NifU-like, N-terminal // 2.9E-81
10686	151885_at	1.1419	3.60612	10.6019	6.55e-12	1.89e-10	16.8296	FBgn0027601	CG9009	CG9009	CG9009	32426	4467 // long-chain-fatty-acid-CoA ligase activity // inferred from sequence or structural similarity /// 3824 // catalytic activity // inferred from electronic annotation /// 4467 // long-chain-fatty-acid-CoA ligase activity // inferred from sequence similarity	6631 // fatty acid metabolism // inferred from electronic annotation /// 8152 // metabolism // inferred from electronic annotation	---	IPR000873 // AMP-dependent synthetase and ligase // 3.0E-108
7582	148781_at	1.13797	1.57314	13.2575	2.03e-14	9.14e-13	22.6897	FBgn0036467	CG12310	CG12310	CG12310	39634	---	---	---	---
11158	152357_at	1.13582	1.94802	9.60486	7.18e-11	1.62e-09	14.4009	FBgn0015794	CG3129	Rab-RP4	Rab-related protein 4	44360	3677 // DNA binding // inferred from electronic annotation /// 3924 // GTPase activity // inferred from sequence or structural similarity /// 5525 // GTP binding // inferred from sequence or structural similarity /// 16818 // hydrolase activity, acting on acid anhydrides, in phosphorus-containing anhydrides // inferred from electronic annotation /// 5524 // ATP binding // inferred from electronic…	160 // two-component signal transduction system (phosphorelay) // inferred from electronic annotation /// 165 // MAPKKK cascade // inferred from electronic annotation /// 6355 // regulation of transcription, DNA-dependent // inferred from electronic annotation /// 6886 // intracellular protein transport // inferred from electronic annotation /// 7155 // cell adhesion // inferred from mutant pheno…	5622 // intracellular // inferred from electronic annotation	IPR001806 // Ras GTPase superfamily // 3.9E-70
2100	143299_at	1.13093	5.8616	8.47118	1.28e-09	2.27e-08	11.4822	FBgn0003067	CG17725	Pepck	Phosphoenolpyruvate carboxykinase	37131	4613 // phosphoenolpyruvate carboxykinase (GTP) activity // inferred from sequence or structural similarity /// 5525 // GTP binding // inferred from electronic annotation /// 166 // nucleotide binding // inferred from electronic annotation /// 4611 // phosphoenolpyruvate carboxykinase activity // inferred from electronic annotation /// 4613 // phosphoenolpyruvate carboxykinase (GTP) activity // i…	6094 // gluconeogenesis // inferred from sequence or structural similarity /// 6094 // gluconeogenesis // non-traceable author statement /// 6094 // gluconeogenesis // inferred from electronic annotation /// 6094 // gluconeogenesis // inferred from sequence similarity	5739 // mitochondrion // inferred from sequence or structural similarity /// 5739 // mitochondrion // inferred from sequence similarity	IPR008209 // Phosphoenolpyruvate carboxykinase (GTP) // 1.0E-126 /// IPR008209 // Phosphoenolpyruvate carboxykinase (GTP) // 1.0E-126
269	141468_at	1.12756	2.6193	13.7079	8.25e-15	4.03e-13	23.6022	FBgn0036702	CG6512	CG6512	CG6512	39922	166 // nucleotide binding // inferred from electronic annotation /// 4222 // metalloendopeptidase activity // inferred from sequence or structural similarity /// 5524 // ATP binding // inferred from electronic annotation /// 16887 // ATPase activity // inferred from sequence or structural similarity /// 5515 // protein binding // inferred from physical interaction /// 4222 // metalloendopeptidase…	6510 // ATP-dependent proteolysis // inferred from sequence or structural similarity /// 7067 // mitosis // inferred from electronic annotation /// 6508 // proteolysis // inferred from electronic annotation /// 30163 // protein catabolism // inferred from electronic annotation /// 6510 // ATP-dependent proteolysis // inferred from sequence similarity	5739 // mitochondrion // inferred from sequence or structural similarity /// 5783 // endoplasmic reticulum // inferred from sequence or structural similarity /// 16020 // membrane // inferred from electronic annotation /// 16021 // integral to membrane // inferred from electronic annotation /// 5739 // mitochondrion // inferred from sequence similarity /// 5783 // endoplasmic reticulum // inferre…	IPR000642 // Peptidase M41 // 3.5E-108 /// IPR003959 // AAA ATPase, central region // 1.8E-92 /// IPR005936 // Peptidase M41, FtsH // 2.5E-41 /// IPR000642 // Peptidase M41 // 3.5E-108 /// IPR003959 // AAA ATPase, central region // 1.8E-92 /// IPR005936 // Peptidase M41, FtsH // 2.5E-41
13952	155151_at	1.11608	1.70935	24.5221	4.57e-22	1.46e-19	40.3971	FBgn0034312	CG10916	CG10916	CG10916	37081	5515 // protein binding // inferred from electronic annotation /// 8270 // zinc ion binding // inferred from electronic annotation /// 46872 // metal ion binding // inferred from electronic annotation	6512 // ubiquitin cycle // inferred from electronic annotation	5634 // nucleus // inferred from electronic annotation	IPR001841 // Zn-finger, RING // 9.1E-14
13660	154859_at	1.11491	1.56007	7.27037	3.23e-08	4.34e-07	8.21832	FBgn0032597	CG17904	CG17904	CG17904	35000	166 // nucleotide binding // inferred from sequence or structural similarity /// 5515 // protein binding // inferred from physical interaction /// 166 // nucleotide binding // inferred from sequence similarity	---	---	---
10230	151429_at	1.11363	5.17025	14.4179	2.08e-15	1.14e-13	24.9966	FBgn0040968	CG14933	CG14933	CG14933	50442	---	---	---	IPR002350 // Serine protease inhibitor, Kazal type // 8.8E-8
1280	142479_at	1.10459	1.84356	11.9376	3.23e-13	1.16e-11	19.8835	FBgn0063492	CG17533	GstE8	Glutathione S transferase E8	37113	5515 // protein binding // inferred from physical interaction /// 4364 // glutathione transferase activity // inferred from electronic annotation /// 16740 // transferase activity // inferred from electronic annotation	---	---	IPR004046 // Glutathione S-transferase, C-terminal // 8.9E-12 /// IPR004045 // Glutathione S-transferase, N-terminal // 6.0E-18 /// IPR004046 // Glutathione S-transferase, C-terminal // 9.0E-13
11359	152558_at	1.0987	1.46262	15.0242	6.69e-16	4.09e-14	26.1466	FBgn0034997	CG3376	CG3376	CG3376	37884	4767 // sphingomyelin phosphodiesterase activity // inferred from sequence or structural similarity /// 16787 // hydrolase activity // inferred from electronic annotation /// 4767 // sphingomyelin phosphodiesterase activity // inferred from electronic annotation /// 4767 // sphingomyelin phosphodiesterase activity // inferred from sequence similarity	6685 // sphingomyelin catabolism // inferred from electronic annotation	---	IPR004843 // Metallo-phosphoesterase // 4.7E-19
4621	145820_at	1.07098	1.78256	3.21922	0.00298005	0.0106344	-3.11836	FBgn0031701	CG14027	TotM	Turandot M	33764	---	16065 // humoral defense mechanism (sensu Protostomia) // non-traceable author statement	---	IPR010825 // Stress-inducible humoral factor Turandot // 2.3E-80 /// IPR010825 // Stress-inducible humoral factor Turandot // 1.1E-9
11528	152727_at	1.06407	2.67769	13.2123	2.22e-14	9.89e-13	22.597	---	CG7224	---	---	---	---	---	---	---
13424	154623_at	1.06114	2.06592	7.39281	2.31e-08	3.18e-07	8.55847	FBgn0029865	CG15893	CG15893	CG15893	31575	5515 // protein binding // inferred from physical interaction	---	---	---
11046	152245_at	1.06096	3.4503	3.87111	0.000512919	0.00245675	-1.42169	FBgn0033857	CG13335	CG13335	CG13335	36511	---	---	---	---
11847	153046_at	1.04683	2.13045	12.9499	3.8e-14	1.6e-12	22.0537	FBgn0014031	CG3926	Spat	Serine pyruvate aminotransferase	31587	4760 // serine-pyruvate transaminase activity // inferred from sequence or structural similarity /// 4760 // serine-pyruvate transaminase activity // non-traceable author statement /// 8453 // alanine-glyoxylate transaminase activity // inferred from direct assay /// 8453 // alanine-glyoxylate transaminase activity // inferred from sequence or structural similarity /// 8483 // transaminase activi…	5975 // carbohydrate metabolism // inferred from electronic annotation /// 6952 // defense response // inferred from electronic annotation /// 9636 // response to toxin // inferred from electronic annotation /// 8152 // metabolism // inferred from electronic annotation	5759 // mitochondrial matrix // inferred from sequence or structural similarity /// 5777 // peroxisome // inferred from sequence or structural similarity /// 5759 // mitochondrial matrix // inferred from sequence similarity /// 5777 // peroxisome // inferred from sequence similarity	IPR000192 // Aminotransferase, class V // 3.0E-28
3607	144806_at	1.04627	1.346	4.72956	4.52e-05	0.000296323	0.965232	FBgn0052687	CG32687	CG32687	CG32687	31980	4672 // protein kinase activity // inferred from electronic annotation /// 4675 // transmembrane receptor protein serine/threonine kinase activity // inferred from electronic annotation /// 4872 // receptor activity // inferred from electronic annotation /// 16301 // kinase activity // inferred from electronic annotation /// 19199 // transmembrane receptor protein kinase activity // inferred from…	6464 // protein modification // inferred from electronic annotation /// 6468 // protein amino acid phosphorylation // inferred from electronic annotation /// 6952 // defense response // inferred from electronic annotation /// 7165 // signal transduction // inferred from electronic annotation /// 7166 // cell surface receptor linked signal transduction // inferred from electronic annotation /// 71…	---	IPR001611 // Leucine-rich repeat // 3.3E-4 /// IPR001611 // Leucine-rich repeat // 2.1E-4 /// IPR001611 // Leucine-rich repeat // 0.0040 /// IPR001611 // Leucine-rich repeat // 0.045 /// IPR001611 // Leucine-rich repeat // 0.23 /// IPR001611 // Leucine-rich repeat // 0.011
245	141444_at	1.04447	1.85719	9.41677	1.14e-10	2.49e-09	13.9282	FBgn0030357	CG2471	CG2471	CG2471	32156	---	---	---	IPR001611 // Leucine-rich repeat // 6.9E-4 /// IPR001611 // Leucine-rich repeat // 0.094
8146	149345_at	1.04283	2.03276	14.0497	4.23e-15	2.21e-13	24.28	FBgn0037354	CG12171	CG12171	CG12171	40690	16614 // oxidoreductase activity, acting on CH-OH group of donors // inferred from sequence or structural similarity /// 5515 // protein binding // inferred from physical interaction /// 16491 // oxidoreductase activity // inferred from electronic annotation /// 16614 // oxidoreductase activity, acting on CH-OH group of donors // inferred from sequence similarity	6629 // lipid metabolism // inferred from electronic annotation /// 8152 // metabolism // inferred from electronic annotation	---	IPR002198 // Short-chain dehydrogenase/reductase SDR // 7.8E-77
13227	154426_at	1.0163	1.83075	12.0069	2.78e-13	1.01e-11	20.0361	FBgn0028519	CG4500	CG4500	CG4500	34822	4467 // long-chain-fatty-acid-CoA ligase activity // inferred from sequence or structural similarity /// 3824 // catalytic activity // inferred from electronic annotation /// 4467 // long-chain-fatty-acid-CoA ligase activity // inferred from sequence similarity	6631 // fatty acid metabolism // inferred from electronic annotation /// 7498 // mesoderm development // inferred from expression pattern /// 8152 // metabolism // inferred from electronic annotation	---	IPR000873 // AMP-dependent synthetase and ligase // 3.4E-83
502	141701_at	1.0135	1.69764	10.1763	1.79e-11	4.64e-10	15.8086	FBgn0033205	CG2064	CG2064	CG2064	35708	16491 // oxidoreductase activity // inferred from electronic annotation	8152 // metabolism // inferred from electronic annotation	---	IPR002198 // Short-chain dehydrogenase/reductase SDR // 1.2E-36
13587	154786_at	1.00365	2.72312	8.73995	6.37e-10	1.21e-08	12.1891	FBgn0038347	CG18522	CG18522	CG18522	41894	16491 // oxidoreductase activity // inferred from electronic annotation /// 5515 // protein binding // inferred from physical interaction /// 5506 // iron ion binding // inferred from electronic annotation /// 30151 // molybdenum ion binding // inferred from electronic annotation /// 46872 // metal ion binding // inferred from electronic annotation /// 51536 // iron-sulfur cluster binding // infe…	6118 // electron transport // inferred from electronic annotation /// 6139 // nucleobase, nucleoside, nucleotide and nucleic acid metabolism // inferred from electronic annotation /// 6144 // purine base metabolism // inferred from electronic annotation /// 6800 // oxygen and reactive oxygen species metabolism // inferred from electronic annotation /// 6952 // defense response // inferred from el…	---	IPR008274 // Aldehyde oxidase and xanthine dehydrogenase, molybdopterin binding // 5.7E-48 /// IPR008274 // Aldehyde oxidase and xanthine dehydrogenase, molybdopterin binding // 1.9E-71 /// IPR002346 // Molybdopterin dehydrogenase, FAD-binding // 2.0E-8 /// IPR000674 // Aldehyde oxidase and xanthine dehydrogenase, a/b hammerhead // 5.3E-33 /// IPR002888 // [2Fe-2S]-binding // 3.6E-49 /// IPR00510…
7514	148713_at	1.00199	1.4329	12.3088	1.45e-13	5.49e-12	20.6935	FBgn0036364	CG14109	CG14109	CG14109	39512	---	---	---	---
8524	149723_at	0.993167	1.25927	13.2048	2.26e-14	9.98e-13	22.5816	FBgn0037974	CG12224	CG12224	CG12224	41453	16491 // oxidoreductase activity // inferred from sequence or structural similarity /// 16491 // oxidoreductase activity // inferred from sequence similarity	---	---	IPR001395 // Aldo/keto reductase // 2.9E-12
10220	151419_at	0.989758	0.415879	7.05896	5.8e-08	7.43e-07	7.62754	FBgn0040955	CG13790	CG13790	CG13790	50429	---	---	---	---
262	141461_at	0.98381	3.8307	7.10929	5.05e-08	6.51e-07	7.76859	FBgn0020764	CG3017	Alas	Aminolevulinate synthase	37815	3870 // 5-aminolevulinate synthase activity // inferred from sequence or structural similarity /// 3870 // 5-aminolevulinate synthase activity // non-traceable author statement /// 8483 // transaminase activity // inferred from electronic annotation /// 16740 // transferase activity // inferred from electronic annotation /// 5515 // protein binding // inferred from physical interaction /// 3870 /…	6520 // amino acid metabolism // inferred from sequence or structural similarity /// 6783 // heme biosynthesis // inferred from sequence or structural similarity /// 6783 // heme biosynthesis // inferred from electronic annotation /// 9058 // biosynthesis // inferred from electronic annotation /// 6520 // amino acid metabolism // inferred from sequence similarity /// 6783 // heme biosynthesis // …	5759 // mitochondrial matrix // inferred from sequence or structural similarity /// 5759 // mitochondrial matrix // inferred from sequence similarity	IPR003408 // Aminolevulinic acid synthase // 3.0E-45 /// IPR004839 // Aminotransferase, class I and II // 1.9E-41
4091	145290_at	0.974999	0.707924	13.7599	7.45e-15	3.68e-13	23.7061	FBgn0030908	CG15057	CG15057	CG15057	32809	---	---	---	---
10609	151808_at	0.971971	0.952631	15.0948	5.87e-16	3.69e-14	26.2781	FBgn0010786	CG9165	l(3)02640	lethal (3) 02640	46140	4418 // hydroxymethylbilane synthase activity // inferred from sequence or structural similarity /// 19239 // deaminase activity // inferred from electronic annotation /// 4418 // hydroxymethylbilane synthase activity // inferred from electronic annotation /// 4418 // hydroxymethylbilane synthase activity // inferred from sequence similarity	6778 // porphyrin metabolism // inferred from electronic annotation /// 6779 // porphyrin biosynthesis // inferred from electronic annotation	---	IPR000860 // Porphobilinogen deaminase // 3.9E-14 /// IPR000860 // Porphobilinogen deaminase // 3.2E-118
12731	153930_at	0.964425	1.15244	12.2751	1.56e-13	5.88e-12	20.6206	FBgn0034354	CG5224	CG5224	CG5224	37128	4364 // glutathione transferase activity // inferred from sequence or structural similarity /// 16740 // transferase activity // inferred from electronic annotation /// 4364 // glutathione transferase activity // inferred from sequence similarity	6952 // defense response // inferred from electronic annotation /// 9636 // response to toxin // inferred from electronic annotation	---	IPR004046 // Glutathione S-transferase, C-terminal // 1.0E-12 /// IPR004045 // Glutathione S-transferase, N-terminal // 4.9E-16
12112	153311_at	0.96192	4.65301	13.3597	1.65e-14	7.59e-13	22.8988	FBgn0001220	CG8542	Hsc70-5	Heat shock protein cognate 5	36583	5524 // ATP binding // inferred from electronic annotation /// 16887 // ATPase activity // non-traceable author statement /// 51082 // unfolded protein binding // inferred from sequence or structural similarity /// 5515 // protein binding // inferred from physical interaction /// 166 // nucleotide binding // inferred from electronic annotation /// 51082 // unfolded protein binding // inferred fro…	6457 // protein folding // inferred from electronic annotation /// 6457 // protein folding // inferred from sequence or structural similarity /// 6626 // protein targeting to mitochondrion // inferred from electronic annotation /// 6952 // defense response // inferred from electronic annotation /// 9408 // response to heat // non-traceable author statement /// 6986 // response to unfolded protein…	5739 // mitochondrion // inferred from sequence or structural similarity /// 5739 // mitochondrion // non-traceable author statement /// 5739 // mitochondrion // inferred from sequence similarity	IPR001023 // Heat shock protein Hsp70 // 1.0E-126
13133	154332_at	0.961456	2.80586	13.4634	1.34e-14	6.31e-13	23.1097	FBgn0039541	CG12876	CG12876	CG12876	43330	4871 // signal transducer activity // inferred from sequence or structural similarity /// 5057 // receptor signaling protein activity // inferred from electronic annotation /// 5515 // protein binding // inferred from physical interaction /// 4871 // signal transducer activity // inferred from sequence similarity	6917 // induction of apoptosis // inferred from electronic annotation /// 7165 // signal transduction // inferred from electronic annotation	---	IPR004328 // BRO1 // 6.1E-84
2797	143996_at	0.960411	1.73182	10.357	1.17e-11	3.18e-10	16.245	FBgn0023530	CG3740	CG3740	CG3740	31119	---	---	---	---
3901	145100_at	0.955991	2.75051	12.3518	1.33e-13	5.08e-12	20.786	FBgn0030610	CG9065	CG9065	CG9065	32439	5507 // copper ion binding // inferred from electronic annotation /// 16531 // copper chaperone activity // inferred from sequence or structural similarity /// 16531 // copper chaperone activity // inferred from sequence similarity	6825 // copper ion transport // inferred from electronic annotation /// 8535 // cytochrome c oxidase complex assembly // inferred from sequence or structural similarity /// 8535 // cytochrome c oxidase complex assembly // inferred from sequence similarity	5758 // mitochondrial intermembrane space // inferred from sequence or structural similarity /// 5758 // mitochondrial intermembrane space // inferred from sequence similarity	IPR007745 // Cytochrome C oxidase copper chaperone // 2.2E-51
9119	150318_at	0.955504	1.0496	12.5927	7.98e-14	3.15e-12	21.3018	FBgn0038893	CG6353	CG6353	CG6353	42551	---	---	---	IPR002804 // Protein of unknown function DUF101 // 3.2E-81
12542	153741_at	0.952819	2.74288	13.3352	1.73e-14	7.94e-13	22.8488	FBgn0028509	CG31811	cenG1A	centaurin gamma 1A	34803	5525 // GTP binding // inferred from electronic annotation /// 8060 // ARF GTPase activator activity // inferred from sequence or structural similarity /// 8060 // ARF GTPase activator activity // non-traceable author statement /// 5515 // protein binding // inferred from physical interaction /// 166 // nucleotide binding // inferred from electronic annotation /// 5096 // GTPase activator activit…	7186 // G-protein coupled receptor protein signaling pathway // inferred from electronic annotation /// 7264 // small GTPase mediated signal transduction // non-traceable author statement /// 43087 // regulation of GTPase activity // inferred from electronic annotation /// 7264 // small GTPase mediated signal transduction // inferred from electronic annotation	5634 // nucleus // non-traceable author statement	IPR001164 // Human Rev interacting-like protein (hRIP) // 2.8E-52 /// IPR002110 // Ankyrin // 7.5E-6 /// IPR001806 // Ras GTPase superfamily // 4.2E-9 /// IPR001849 // Pleckstrin-like // 2.7E-16 /// IPR001164 // Human Rev interacting-like protein (hRIP) // 2.8E-52 /// IPR002110 // Ankyrin // 7.5E-6 /// IPR001806 // Ras GTPase superfamily // 4.2E-9 /// IPR001849 // Pleckstrin-like // 2.7E-16 /// I…
2080	143279_at	0.952181	1.52857	18.6879	1.37e-18	1.55e-16	32.3918	FBgn0011774	CG5247	Irbp	Inverted repeat-binding protein	117419	3677 // DNA binding // inferred from direct assay /// 3677 // DNA binding // inferred from sequence or structural similarity /// 3677 // DNA binding // non-traceable author statement /// 4003 // ATP-dependent DNA helicase activity // non-traceable author statement /// 4677 // DNA-dependent protein kinase activity // inferred from direct assay /// 4677 // DNA-dependent protein kinase activity // i…	723 // telomere maintenance // inferred from mutant phenotype /// 6260 // DNA replication // inferred from electronic annotation /// 6303 // double-strand break repair via nonhomologous end joining // inferred from electronic annotation /// 6310 // DNA recombination // inferred from electronic annotation	5634 // nucleus // non-traceable author statement /// 5634 // nucleus // inferred from electronic annotation /// 5958 // DNA-dependent protein kinase complex // inferred from electronic annotation	IPR006164 // Ku // 3.4E-75 /// IPR005161 // Ku70/Ku80 N-terminal alpha/beta domain // 3.9E-72 /// IPR005160 // Ku70/Ku80 C-terminal arm // 4.8E-24
1987	143186_at	0.952118	4.55982	6.95772	7.69e-08	9.56e-07	7.34315	FBgn0001168	CG6494	h	hairy	38995	3677 // DNA binding // inferred from electronic annotation /// 5515 // protein binding // inferred from physical interaction /// 16564 // transcriptional repressor activity // inferred from sequence or structural similarity /// 16565 // general transcriptional repressor activity // traceable author statement /// 16566 // specific transcriptional repressor activity // non-traceable author statemen…	122 // negative regulation of transcription from RNA polymerase II promoter // inferred from mutant phenotype /// 122 // negative regulation of transcription from RNA polymerase II promoter // inferred from physical interaction /// 122 // negative regulation of transcription from RNA polymerase II promoter // non-traceable author statement /// 122 // negative regulation of transcription from RNA …	5634 // nucleus // non-traceable author statement /// 5634 // nucleus // inferred from electronic annotation	IPR001092 // Basic helix-loop-helix dimerization domain bHLH // 7.3E-19
5034	146233_at	0.952032	2.00593	7.97651	4.74e-09	7.43e-08	10.1578	FBgn0040211	CG4779	hgo	homogentisate 1,2-dioxygenase	34552	4411 // homogentisate 1,2-dioxygenase activity // inferred from sequence or structural similarity /// 4411 // homogentisate 1,2-dioxygenase activity // non-traceable author statement /// 42802 // identical protein binding // inferred from physical interaction /// 4411 // homogentisate 1,2-dioxygenase activity // inferred from electronic annotation /// 5506 // iron ion binding // inferred from ele…	6559 // L-phenylalanine catabolism // non-traceable author statement /// 6572 // tyrosine catabolism // non-traceable author statement /// 6559 // L-phenylalanine catabolism // inferred from electronic annotation /// 6570 // tyrosine metabolism // inferred from electronic annotation /// 6572 // tyrosine catabolism // inferred from electronic annotation	---	IPR005708 // Homogentisate 1,2-dioxygenase // 1.0E-126
11662	152861_at	0.938693	1.67718	8.43194	1.42e-09	2.5e-08	11.3782	FBgn0033391	CG8026	CG8026	CG8026	35941	5386 // carrier activity // inferred from sequence or structural similarity /// 5488 // binding // inferred from electronic annotation /// 8517 // folic acid transporter activity // inferred from sequence or structural similarity /// 5215 // transporter activity // inferred from electronic annotation /// 5386 // carrier activity // inferred from sequence similarity /// 8517 // folic acid transpor…	6839 // mitochondrial transport // inferred from sequence or structural similarity /// 15884 // folic acid transport // inferred from sequence or structural similarity /// 6810 // transport // inferred from electronic annotation /// 6839 // mitochondrial transport // inferred from electronic annotation /// 6839 // mitochondrial transport // inferred from sequence similarity /// 15884 // folic aci…	5740 // mitochondrial envelope // inferred from sequence or structural similarity /// 5743 // mitochondrial inner membrane // inferred from sequence or structural similarity /// 5739 // mitochondrion // inferred from electronic annotation /// 5743 // mitochondrial inner membrane // inferred from electronic annotation /// 16020 // membrane // inferred from electronic annotation /// 16021 // integr…	IPR001993 // Mitochondrial substrate carrier // 2.5E-30 /// IPR001993 // Mitochondrial substrate carrier // 4.4E-31 /// IPR001993 // Mitochondrial substrate carrier // 1.3E-16 /// IPR001993 // Mitochondrial substrate carrier // 1.7E-10
2175	143374_at	0.938128	1.29093	6.42549	3.44e-07	3.77e-06	5.83428	FBgn0003676	CG5374	T-cp1	Tcp1-like	42649	5524 // ATP binding // non-traceable author statement /// 8553 // hydrogen-exporting ATPase activity, phosphorylative mechanism // non-traceable author statement /// 42623 // ATPase activity, coupled // inferred from electronic annotation /// 51082 // unfolded protein binding // inferred from sequence or structural similarity /// 166 // nucleotide binding // inferred from electronic annotation //…	6457 // protein folding // inferred from sequence or structural similarity /// 6457 // protein folding // non-traceable author statement /// 6457 // protein folding // inferred from electronic annotation /// 44267 // cellular protein metabolism // inferred from electronic annotation /// 6457 // protein folding // inferred from sequence similarity	5753 // proton-transporting ATP synthase complex (sensu Eukaryota) // non-traceable author statement /// 5832 // chaperonin-containing T-complex // inferred from sequence or structural similarity /// 5832 // chaperonin-containing T-complex // inferred from sequence similarity	IPR002423 // Chaperonin Cpn60/TCP-1 // 1.0E-126
13253	154452_at	0.93775	3.08502	11.1784	1.74e-12	5.51e-11	18.1751	FBgn0040236	CG12132	c11.1	c11.1	53436	5515 // protein binding // inferred from physical interaction /// 5488 // binding // inferred from electronic annotation	---	---	---
5572	146771_at	0.937155	2.15418	6.49076	2.86e-07	3.17e-06	6.02041	FBgn0033226	CG1882	CG1882	CG1882	35733	3824 // catalytic activity // inferred from electronic annotation /// 16787 // hydrolase activity // inferred from electronic annotation	6725 // aromatic compound metabolism // inferred from electronic annotation	---	IPR000073 // Alpha/beta hydrolase fold // 1.1E-22 /// IPR000073 // Alpha/beta hydrolase fold // 1.1E-22
12474	153673_at	0.935664	2.6869	11.2719	1.41e-12	4.57e-11	18.3894	FBgn0000083	CG5730	AnnIX	Annexin IX	42492	3779 // actin binding // inferred from sequence or structural similarity /// 5509 // calcium ion binding // inferred from sequence or structural similarity /// 5509 // calcium ion binding // non-traceable author statement /// 5543 // phospholipid binding // non-traceable author statement /// 5544 // calcium-dependent phospholipid binding // inferred from sequence or structural similarity /// 5515…	6629 // lipid metabolism // inferred from electronic annotation /// 50819 // negative regulation of coagulation // inferred from electronic annotation	---	IPR001464 // Annexin // 2.3E-30 /// IPR001464 // Annexin // 1.9E-29 /// IPR001464 // Annexin // 2.1E-26 /// IPR001464 // Annexin // 2.1E-27 /// IPR001464 // Annexin // 2.4E-32 /// IPR001464 // Annexin // 9.5E-24
312	141511_at	0.928442	2.88622	10.5632	7.17e-12	2.03e-10	16.7376	FBgn0016794	CG1044	dos	daughter of sevenless	38321	5070 // SH3/SH2 adaptor activity // inferred from sequence or structural similarity /// 42169 // SH2 domain binding // inferred from physical interaction /// 5070 // SH3/SH2 adaptor activity // inferred from sequence similarity	8293 // torso signaling pathway // non-traceable author statement /// 8595 // determination of anterior/posterior axis, embryo // traceable author statement /// 45500 // sevenless signaling pathway // traceable author statement	5886 // plasma membrane // inferred from sequence or structural similarity /// 5886 // plasma membrane // inferred from sequence similarity	IPR001849 // Pleckstrin-like // 3.9E-29 /// IPR001849 // Pleckstrin-like // 1.4E-10
12854	154053_at	0.927005	3.30775	11.4413	9.63e-13	3.24e-11	18.7749	FBgn0020653	CG2151	Trxr-1	Thioredoxin reductase-1	31760	4362 // glutathione-disulfide reductase activity // inferred from direct assay /// 4362 // glutathione-disulfide reductase activity // non-traceable author statement /// 4791 // thioredoxin-disulfide reductase activity // inferred from direct assay /// 4791 // thioredoxin-disulfide reductase activity // inferred from sequence or structural similarity /// 16209 // antioxidant activity // inferred …	6125 // thioredoxin pathway // inferred from direct assay /// 6790 // sulfur metabolism // inferred from electronic annotation /// 8340 // determination of adult life span // traceable author statement /// 6125 // thioredoxin pathway // inferred from mutant phenotype /// 6118 // electron transport // inferred from electronic annotation	5737 // cytoplasm // inferred from direct assay /// 5737 // cytoplasm // non-traceable author statement /// 5739 // mitochondrion // inferred from direct assay /// 5737 // cytoplasm // inferred from electronic annotation /// 5739 // mitochondrion // inferred from electronic annotation	IPR004099 // Pyridine nucleotide-disulphide oxidoreductase dimerisation domain // 8.3E-42 /// IPR001327 // FAD-dependent pyridine nucleotide-disulphide oxidoreductase // 8.2E-94 /// IPR004099 // Pyridine nucleotide-disulphide oxidoreductase dimerisation domain // 8.3E-42 /// IPR001327 // FAD-dependent pyridine nucleotide-disulphide oxidoreductase // 8.2E-94 /// IPR004099 // Pyridine nucleotide-di…
9380	150579_at	0.925214	2.25107	9.4	1.19e-10	2.59e-09	13.8858	FBgn0039316	CG11893	CG11893	CG11893	43056	5515 // protein binding // inferred from physical interaction /// 16301 // kinase activity // inferred from electronic annotation /// 16740 // transferase activity // inferred from electronic annotation	---	---	IPR004119 // Protein of unknown function DUF227 // 1.8E-76
10879	152078_at	0.924053	1.54682	18.7661	1.22e-18	1.4e-16	32.5134	FBgn0031824	CG9547	CG9547	CG9547	33911	4361 // glutaryl-CoA dehydrogenase activity // inferred from sequence or structural similarity /// 5515 // protein binding // inferred from physical interaction /// 3995 // acyl-CoA dehydrogenase activity // inferred from electronic annotation /// 16491 // oxidoreductase activity // inferred from electronic annotation /// 4361 // glutaryl-CoA dehydrogenase activity // inferred from sequence simil…	6118 // electron transport // inferred from electronic annotation /// 6554 // lysine catabolism // inferred from sequence or structural similarity /// 6568 // tryptophan metabolism // inferred from sequence or structural similarity /// 6637 // acyl-CoA metabolism // inferred from electronic annotation /// 46948 // hydroxylysine catabolism // inferred from sequence or structural similarity /// 655…	5759 // mitochondrial matrix // inferred from sequence or structural similarity /// 5759 // mitochondrial matrix // inferred from sequence similarity	IPR006091 // Acyl-CoA dehydrogenase, central domain // 2.6E-16 /// IPR006092 // Acyl-CoA dehydrogenase, N-terminal // 2.1E-13 /// IPR006090 // Acyl-CoA dehydrogenase, C-terminal // 5.8E-42
10857	152056_at	0.923163	4.60611	10.2794	1.4e-11	3.76e-10	16.0581	FBgn0003231	CG10360	ref(2)P	refractory to sigma P	35246	4197 // cysteine-type endopeptidase activity // inferred from electronic annotation /// 8270 // zinc ion binding // inferred from electronic annotation /// 30528 // transcription regulator activity // inferred from electronic annotation /// 5515 // protein binding // inferred from physical interaction /// 3677 // DNA binding // inferred from electronic annotation /// 46872 // metal ion binding //…	6508 // proteolysis // inferred from electronic annotation /// 19058 // viral infectious cycle // non-traceable author statement	5634 // nucleus // non-traceable author statement /// 5634 // nucleus // inferred from electronic annotation	IPR000433 // Zn-finger, ZZ type // 8.7E-25 /// IPR000270 // Octicosapeptide/Phox/Bem1p // 4.3E-8
4757	145956_at	0.923061	2.45762	7.38921	2.33e-08	3.21e-07	8.5485	FBgn0031913	CG5958	CG5958	CG5958	34022	5386 // carrier activity // inferred from electronic annotation /// 16918 // retinal binding // inferred from sequence or structural similarity /// 5215 // transporter activity // inferred from electronic annotation /// 16918 // retinal binding // inferred from sequence similarity	6732 // coenzyme metabolism // inferred from electronic annotation /// 6810 // transport // inferred from electronic annotation /// 51189 // prosthetic group metabolism // inferred from electronic annotation	5622 // intracellular // inferred from electronic annotation	IPR001251 // Cellular retinaldehyde-binding)/triple function, C-terminal // 1.2E-30
11188	152387_at	0.921234	1.91495	5.90454	1.53e-06	1.42e-05	4.34044	FBgn0027544	CG2217	CG2217	CG2217	43607	5515 // protein binding // inferred from physical interaction	---	---	---
9383	150582_at	0.92098	1.14872	14.9854	7.18e-16	4.34e-14	26.0741	FBgn0039319	CG13659	CG13659	CG13659	43059	5515 // protein binding // inferred from physical interaction /// 16301 // kinase activity // inferred from electronic annotation /// 16740 // transferase activity // inferred from electronic annotation	---	---	IPR004119 // Protein of unknown function DUF227 // 1.5E-72
7931	149130_at	0.918926	0.053695	11.7279	5.11e-13	1.81e-11	19.4187	FBgn0036995	CG5195	CG5195	CG5195	40266	166 // nucleotide binding // inferred from electronic annotation /// 3677 // DNA binding // inferred from electronic annotation /// 3887 // DNA-directed DNA polymerase activity // inferred from electronic annotation /// 8408 // 3'-5' exonuclease activity // inferred from electronic annotation	6260 // DNA replication // inferred from electronic annotation /// 7155 // cell adhesion // inferred from electronic annotation /// 19226 // transmission of nerve impulse // inferred from electronic annotation	---	IPR001611 // Leucine-rich repeat // 0.0019 /// IPR001611 // Leucine-rich repeat // 0.0021 /// IPR001611 // Leucine-rich repeat // 0.024 /// IPR001611 // Leucine-rich repeat // 0.2 /// IPR001611 // Leucine-rich repeat // 0.0032 /// IPR001611 // Leucine-rich repeat // 0.038 /// IPR001611 // Leucine-rich repeat // 0.014 /// IPR001611 // Leucine-rich repeat // 9.5E-4 /// IPR001611 // Leucine-rich rep…
10010	151209_at	0.918008	5.04802	5.58837	3.79e-06	3.25e-05	3.42962	FBgn0040734	CG15065	CG15065	CG15065	50207	---	---	---	---
4449	145648_at	0.91521	0.767292	7.99973	4.45e-09	7.06e-08	10.2207	FBgn0041337	CG18559	Cyp309a2	Cyp309a2	33439	4497 // monooxygenase activity // inferred from electronic annotation /// 16491 // oxidoreductase activity // inferred from electronic annotation /// 5506 // iron ion binding // inferred from electronic annotation /// 20037 // heme binding // inferred from electronic annotation /// 46872 // metal ion binding // inferred from electronic annotation	6118 // electron transport // inferred from electronic annotation /// 8202 // steroid metabolism // inferred from electronic annotation	5792 // microsome // non-traceable author statement /// 16020 // membrane // non-traceable author statement /// 5783 // endoplasmic reticulum // inferred from electronic annotation /// 5792 // microsome // inferred from electronic annotation /// 16020 // membrane // inferred from electronic annotation	IPR001128 // Cytochrome P450 // 4.8E-48
4108	145307_at	0.911825	1.93395	6.14073	7.75e-07	7.82e-06	5.01923	FBgn0030929	CG15043	CG15043	CG15043	32835	---	---	---	---
10923	152122_at	0.911067	2.89166	6.12629	8.08e-07	8.11e-06	4.9778	FBgn0034296	CG10912	CG10912	CG10912	37059	---	---	---	IPR007931 // Protein of unknown function DUF725 // 1.3E-71
11556	152755_at	0.910361	2.64669	9.71974	5.42e-11	1.27e-09	14.6873	FBgn0033269	CG8709	CG8709	CG8709	35790	---	6629 // lipid metabolism // inferred from electronic annotation /// 7275 // development // inferred from electronic annotation	---	IPR007651 // Lipin, N-terminal conserved region // 1.6E-74
12079	153278_at	0.905313	2.0128	9.56602	7.91e-11	1.77e-09	14.3036	FBgn0010621	CG8439	Cct5	T-complex Chaperonin 5	36308	5524 // ATP binding // inferred from electronic annotation /// 42623 // ATPase activity, coupled // inferred from sequence or structural similarity /// 51082 // unfolded protein binding // inferred from sequence or structural similarity /// 166 // nucleotide binding // inferred from electronic annotation /// 5515 // protein binding // inferred from electronic annotation /// 51082 // unfolded prot…	6457 // protein folding // inferred from sequence or structural similarity /// 6457 // protein folding // inferred from electronic annotation /// 44267 // cellular protein metabolism // inferred from electronic annotation /// 6457 // protein folding // inferred from sequence similarity	5832 // chaperonin-containing T-complex // inferred from sequence or structural similarity /// 5832 // chaperonin-containing T-complex // inferred from sequence similarity	IPR002423 // Chaperonin Cpn60/TCP-1 // 1.0E-126 /// IPR002423 // Chaperonin Cpn60/TCP-1 // 1.0E-126
577	141776_at	0.901296	2.8652	13.4179	1.47e-14	6.86e-13	23.0172	FBgn0039543	CG12428	CG12428	CG12428	43332	8458 // carnitine O-octanoyltransferase activity // inferred from sequence or structural similarity /// 16407 // acetyltransferase activity // inferred from electronic annotation /// 5515 // protein binding // inferred from physical interaction /// 8415 // acyltransferase activity // inferred from electronic annotation /// 16740 // transferase activity // inferred from electronic annotation /// 8…	6520 // amino acid metabolism // inferred from electronic annotation	5777 // peroxisome // inferred from sequence or structural similarity /// 5777 // peroxisome // inferred from sequence similarity	IPR000542 // Acyltransferase ChoActase/COT/CPT // 2.4E-118
12695	153894_at	0.897556	2.69893	7.0379	6.15e-08	7.85e-07	7.56845	FBgn0039644	CG11897	CG11897	CG11897	43450	166 // nucleotide binding // inferred from electronic annotation /// 5524 // ATP binding // inferred from electronic annotation /// 8559 // xenobiotic-transporting ATPase activity // inferred from sequence or structural similarity /// 15239 // multidrug transporter activity // inferred from sequence or structural similarity /// 16163 // nitrogenase activity // inferred from electronic annotation …	6858 // extracellular transport // inferred from electronic annotation /// 6952 // defense response // inferred from electronic annotation /// 9399 // nitrogen fixation // inferred from electronic annotation /// 9636 // response to toxin // inferred from electronic annotation /// 6810 // transport // inferred from electronic annotation	16021 // integral to membrane // inferred from electronic annotation /// 16020 // membrane // inferred from electronic annotation	IPR001140 // ABC transporter, transmembrane region // 9.3E-18 /// IPR001140 // ABC transporter, transmembrane region // 3.7E-22 /// IPR003439 // ABC transporter // 2.0E-37 /// IPR003439 // ABC transporter // 7.8E-46
8614	149813_at	0.888396	1.72399	11.2906	1.35e-12	4.41e-11	18.4321	FBgn0038107 /// FBgn0035198	CG17327	CG17327 /// CG9133	CG17327 /// CG9133	3772453 /// 41598	---	---	---	IPR002833 // Protein of unknown function UPF0099 // 6.3E-38
12384	153583_at	0.884021	1.92886	6.90809	8.84e-08	1.09e-06	7.20341	FBgn0001224	CG4463	Hsp23	Heat shock protein 23	39077	3779 // actin binding // inferred from sequence or structural similarity /// 5515 // protein binding // inferred from physical interaction /// 3779 // actin binding // inferred from sequence similarity	6457 // protein folding // inferred from electronic annotation /// 6952 // defense response // inferred from electronic annotation /// 9408 // response to heat // inferred from sequence or structural similarity /// 9408 // response to heat // non-traceable author statement /// 6986 // response to unfolded protein // inferred from electronic annotation /// 9408 // response to heat // inferred from…	---	IPR002068 // Heat shock protein Hsp20 // 5.6E-47
7924	149123_at	0.882778	1.07338	9.67227	6.08e-11	1.4e-09	14.5692	FBgn0028978	CG5408	trbl	tribbles	43999	4674 // protein serine/threonine kinase activity // inferred from sequence or structural similarity /// 4674 // protein serine/threonine kinase activity // traceable author statement /// 4702 // receptor signaling protein serine/threonine kinase activity // inferred from electronic annotation /// 5524 // ATP binding // inferred from electronic annotation /// 5515 // protein binding // inferred fr…	74 // regulation of progression through cell cycle // inferred from mutant phenotype /// 6468 // protein amino acid phosphorylation // inferred from electronic annotation /// 7165 // signal transduction // inferred from electronic annotation /// 7369 // gastrulation // non-traceable author statement /// 7370 // ventral furrow formation // inferred from genetic interaction /// 45839 // negative re…	---	IPR000719 // Protein kinase // 5.6E-5 /// IPR000719 // Protein kinase // 1.1E-16
10234	151433_at	0.871559	1.67869	5.11016	1.51e-05	0.000112053	2.05308	FBgn0040972	CG16978	CG16978	CG16978	50446	---	---	---	---
11758	152957_at	0.870812	2.4403	6.80254	1.19e-07	1.41e-06	6.90549	FBgn0052103	CG32103	CG32103	CG32103	39415	5386 // carrier activity // inferred from sequence or structural similarity /// 5488 // binding // inferred from electronic annotation /// 5509 // calcium ion binding // inferred from electronic annotation /// 5386 // carrier activity // inferred from sequence similarity	6810 // transport // inferred from sequence or structural similarity /// 6812 // cation transport // inferred from electronic annotation /// 6810 // transport // inferred from electronic annotation /// 6810 // transport // inferred from sequence similarity	5740 // mitochondrial envelope // inferred from sequence or structural similarity /// 5743 // mitochondrial inner membrane // inferred from electronic annotation /// 5778 // peroxisomal membrane // inferred from sequence or structural similarity /// 16020 // membrane // inferred from electronic annotation /// 16021 // integral to membrane // inferred from electronic annotation /// 5740 // mitocho…	IPR001993 // Mitochondrial substrate carrier // 4.5E-31 /// IPR001993 // Mitochondrial substrate carrier // 1.9E-35 /// IPR001993 // Mitochondrial substrate carrier // 2.2E-24 /// IPR001993 // Mitochondrial substrate carrier // 4.5E-31 /// IPR001993 // Mitochondrial substrate carrier // 1.9E-35 /// IPR001993 // Mitochondrial substrate carrier // 2.2E-24 /// IPR002048 // Calcium-binding EF-hand //…
8319	149518_at	0.870314	1.64434	10.3171	1.28e-11	3.46e-10	16.1489	FBgn0037612	CG8112	CG8112	CG8112	41033	4772 // sterol O-acyltransferase activity // inferred from sequence or structural similarity /// 4772 // sterol O-acyltransferase activity // inferred from sequence similarity	8203 // cholesterol metabolism // inferred from electronic annotation	---	IPR004299 // Membrane bound O-acyl transferase, MBOAT // 4.7E-23
6066	147265_at	0.858918	1.15213	10.1237	2.03e-11	5.18e-10	15.6809	FBgn0034045	CG8249	CG8249	CG8249	36742	5351 // sugar porter activity // inferred from electronic annotation /// 5355 // glucose transporter activity // inferred from sequence or structural similarity /// 5215 // transporter activity // inferred from electronic annotation /// 5355 // glucose transporter activity // inferred from sequence similarity	5975 // carbohydrate metabolism // inferred from electronic annotation /// 8643 // carbohydrate transport // inferred from electronic annotation /// 6810 // transport // inferred from electronic annotation	16020 // membrane // inferred from electronic annotation /// 16021 // integral to membrane // inferred from electronic annotation	IPR005828 // General substrate transporter // 5.0E-57
11088	152287_at	0.858073	3.12804	9.72533	5.34e-11	1.25e-09	14.7012	FBgn0026208	CG4143	mbf1	multiprotein bridging factor 1	39842	3713 // transcription coactivator activity // inferred from sequence or structural similarity /// 8327 // methyl-CpG binding // inferred from sequence or structural similarity /// 43565 // sequence-specific DNA binding // inferred from electronic annotation /// 3713 // transcription coactivator activity // inferred from sequence similarity /// 8327 // methyl-CpG binding // inferred from sequence …	6357 // regulation of transcription from RNA polymerase II promoter // inferred from electronic annotation /// 7417 // central nervous system development // inferred from genetic interaction /// 7417 // central nervous system development // inferred from mutant phenotype /// 7424 // tracheal system development (sensu Insecta) // inferred from genetic interaction /// 7424 // tracheal system develo…	5634 // nucleus // inferred from direct assay /// 5737 // cytoplasm // inferred from direct assay	IPR001387 // Helix-turn-helix motif // 1.0E-11
7349	148548_at	0.850874	2.92347	15.8481	1.51e-16	1.08e-14	27.6523	FBgn0010741	CG6302	l(3)01239	lethal (3) 01239	46121	51087 // chaperone binding // inferred from sequence or structural similarity /// 51087 // chaperone binding // inferred from sequence similarity	6458 // 'de novo' protein folding // inferred from sequence or structural similarity /// 9993 // oogenesis (sensu Insecta) // inferred from mutant phenotype /// 6458 // 'de novo' protein folding // inferred from sequence similarity	16272 // prefoldin complex // inferred from sequence or structural similarity /// 16272 // prefoldin complex // inferred from sequence similarity	IPR002777 // Prefoldin-related KE2 protein // 1.8E-20
2634	143833_at	0.839437	0.430061	8.50071	1.18e-09	2.13e-08	11.5603	FBgn0015621	CG3642	Clp	Clipper	33259	3676 // nucleic acid binding // inferred from electronic annotation /// 4521 // endoribonuclease activity // inferred from direct assay /// 5515 // protein binding // inferred from physical interaction /// 8270 // zinc ion binding // inferred from electronic annotation	6378 // mRNA polyadenylylation // inferred from sequence or structural similarity /// 6379 // mRNA cleavage // inferred from sequence or structural similarity /// 6378 // mRNA polyadenylylation // inferred from sequence similarity /// 6379 // mRNA cleavage // inferred from sequence similarity	5847 // mRNA cleavage and polyadenylation specificity factor complex // inferred from sequence or structural similarity /// 5847 // mRNA cleavage and polyadenylation specificity factor complex // inferred from sequence similarity	IPR001878 // Zn-finger, CCHC type // 8.0E-5 /// IPR001878 // Zn-finger, CCHC type // 1.4E-6 /// IPR000571 // Zn-finger, C-x8-C-x5-C-x3-H type // 1.3E-7
2469	143668_at	0.834403	1.70838	13.8882	5.79e-15	2.93e-13	23.9614	FBgn0011638	CG10922	La	La autoantigen-like	35305	3718 // RNA polymerase III transcription termination factor activity // inferred from sequence or structural similarity /// 3718 // RNA polymerase III transcription termination factor activity // non-traceable author statement /// 3729 // mRNA binding // inferred from sequence or structural similarity /// 3729 // mRNA binding // non-traceable author statement /// 8098 // 5S rRNA primary transcrip…	6396 // RNA processing // inferred from electronic annotation /// 6399 // tRNA metabolism // inferred from electronic annotation /// 6405 // RNA export from nucleus // inferred from electronic annotation	5634 // nucleus // non-traceable author statement /// 5737 // cytoplasm // inferred from electronic annotation /// 30529 // ribonucleoprotein complex // inferred from electronic annotation /// 5634 // nucleus // inferred from electronic annotation	IPR000504 // RNA-binding region RNP-1 (RNA recognition motif) // 2.7E-11 /// IPR006630 // RNA-binding protein Lupus Lal // 8.0E-35
125	141324_at	0.832841	1.35647	9.81635	4.28e-11	1.02e-09	14.9269	FBgn0031910	CG15818	CG15818	CG15818	34019	5529 // sugar binding // inferred from electronic annotation	7275 // development // inferred from electronic annotation /// 7276 // gametogenesis // inferred from electronic annotation /// 7283 // spermatogenesis // inferred from electronic annotation	---	IPR001304 // C-type lectin // 4.6E-12
2077	143276_at	0.828231	6.46096	8.54083	1.07e-09	1.94e-08	11.6663	FBgn0002868	CG9470	MtnA	Metallothionein A	41202	46872 // metal ion binding // non-traceable author statement /// 5507 // copper ion binding // inferred from electronic annotation /// 8270 // zinc ion binding // inferred from electronic annotation /// 46870 // cadmium ion binding // inferred from electronic annotation /// 46872 // metal ion binding // inferred from electronic annotation	---	---	IPR000966 // Diptera metallothionein, family 5 // 1.6E-20
4110	145309_at	0.825723	1.00623	12.7542	5.7e-14	2.33e-12	21.6436	FBgn0027087	CG6335	Aats-his	Histidyl-tRNA synthetase	32841	3729 // mRNA binding // inferred from electronic annotation /// 4821 // histidine-tRNA ligase activity // inferred from sequence or structural similarity /// 4821 // histidine-tRNA ligase activity // non-traceable author statement /// 5524 // ATP binding // inferred from electronic annotation /// 4812 // aminoacyl-tRNA ligase activity // inferred from electronic annotation /// 4821 // histidine-t…	6427 // histidyl-tRNA aminoacylation // non-traceable author statement /// 6412 // protein biosynthesis // inferred from electronic annotation /// 6418 // tRNA aminoacylation for protein translation // inferred from electronic annotation /// 6427 // histidyl-tRNA aminoacylation // inferred from electronic annotation	5737 // cytoplasm // inferred from electronic annotation	IPR004154 // Anticodon binding domain // 2.9E-22 /// IPR002314 // tRNA synthetases, class-II (G, H, P and S) // 7.9E-33 /// IPR000738 // WHEP-TRS // 7.2E-16 /// IPR004154 // Anticodon binding domain // 2.9E-22 /// IPR002314 // tRNA synthetases, class-II (G, H, P and S) // 7.9E-7 /// IPR002314 // tRNA synthetases, class-II (G, H, P and S) // 2.0E-18 /// IPR000738 // WHEP-TRS // 1.1E-6
4901	146100_at	0.825336	0.972019	8.4747	1.27e-09	2.25e-08	11.4915	FBgn0032140	CG13117	CG13117	CG13117	34289	5515 // protein binding // inferred from physical interaction	---	---	---
11629	152828_at	0.824645	1.22776	16.9777	2.16e-17	1.88e-15	29.6169	FBgn0031039 /// FBgn0031038	CG14209 /// CG14208	Shawn /// Tyler	Shawn /// Tyler	3772349 /// 3772641	5386 // carrier activity // inferred from sequence or structural similarity /// 5488 // binding // inferred from electronic annotation /// 5215 // transporter activity // inferred from electronic annotation	6810 // transport // inferred from sequence or structural similarity /// 6810 // transport // inferred from electronic annotation	5740 // mitochondrial envelope // inferred from sequence or structural similarity /// 16021 // integral to membrane // inferred from sequence or structural similarity /// 5743 // mitochondrial inner membrane // inferred from sequence or structural similarity /// 5743 // mitochondrial inner membrane // inferred from electronic annotation /// 16020 // membrane // inferred from electronic annotation…	---
10541	151740_at	0.823504	4.09657	12.8038	5.14e-14	2.13e-12	21.748	FBgn0030086	CG7033	CG7033	CG7033	31838	3676 // nucleic acid binding // inferred from electronic annotation /// 5524 // ATP binding // inferred from electronic annotation /// 8026 // ATP-dependent helicase activity // inferred from electronic annotation /// 42623 // ATPase activity, coupled // inferred from electronic annotation /// 51082 // unfolded protein binding // inferred from electronic annotation /// 5515 // protein binding // …	6457 // protein folding // inferred from electronic annotation /// 6457 // protein folding // inferred from sequence or structural similarity /// 44267 // cellular protein metabolism // inferred from electronic annotation /// 6457 // protein folding // inferred from sequence similarity	5832 // chaperonin-containing T-complex // inferred from sequence or structural similarity /// 5832 // chaperonin-containing T-complex // inferred from sequence similarity	IPR002423 // Chaperonin Cpn60/TCP-1 // 1.0E-126 /// IPR002423 // Chaperonin Cpn60/TCP-1 // 1.0E-126
5615	146814_at	0.823062	1.96618	5.91148	1.5e-06	1.4e-05	4.36042	FBgn0033301	CG12780	CG12780	CG12780	35834	8368 // Gram-negative bacterial binding // inferred from sequence or structural similarity /// 15926 // glucosidase activity // inferred from electronic annotation /// 8368 // Gram-negative bacterial binding // inferred from sequence similarity	5976 // polysaccharide metabolism // inferred from electronic annotation /// 6952 // defense response // inferred from electronic annotation	---	---
11029	152228_at	0.813768	3.23782	9.96662	2.97e-11	7.3e-10	15.2971	FBgn0021872	CG9415	Xbp1	X box binding protein-1	44226	3700 // transcription factor activity // inferred from sequence or structural similarity /// 42803 // protein homodimerization activity // inferred from sequence or structural similarity /// 3677 // DNA binding // inferred from electronic annotation /// 43565 // sequence-specific DNA binding // inferred from electronic annotation /// 46983 // protein dimerization activity // inferred from electro…	6355 // regulation of transcription, DNA-dependent // inferred from electronic annotation /// 45449 // regulation of transcription // inferred from sequence or structural similarity /// 45449 // regulation of transcription // inferred from sequence similarity	5634 // nucleus // inferred from sequence or structural similarity /// 5634 // nucleus // inferred from electronic annotation /// 5634 // nucleus // inferred from sequence similarity	IPR004827 // Basic-leucine zipper (bZIP) transcription factor // 5.2E-8
1557	142756_at	0.81199	2.57256	4.34357	0.000136079	0.000788774	-0.123091	FBgn0030263	CG2076	CG2076	CG2076	32041	---	---	---	---
13422	154621_at	0.811052	3.86979	9.55213	8.18e-11	1.83e-09	14.2688	FBgn0027493	CG17273	CG17273	CG17273	42466	4019 // adenylosuccinate synthase activity // inferred from sequence or structural similarity /// 4019 // adenylosuccinate synthase activity // non-traceable author statement /// 5525 // GTP binding // inferred from electronic annotation /// 5515 // protein binding // inferred from physical interaction /// 166 // nucleotide binding // inferred from electronic annotation /// 287 // magnesium ion b…	6164 // purine nucleotide biosynthesis // non-traceable author statement /// 6164 // purine nucleotide biosynthesis // inferred from electronic annotation	---	IPR001114 // Adenylosuccinate synthetase // 1.0E-126
8837	150036_at	0.807114	1.9021	9.67028	6.11e-11	1.4e-09	14.5642	FBgn0038455	CG14907	CG14907	CG14907	42031	8168 // methyltransferase activity // inferred from electronic annotation	6139 // nucleobase, nucleoside, nucleotide and nucleic acid metabolism // inferred from electronic annotation	5634 // nucleus // inferred from electronic annotation	---
1022	142221_at	0.805674	0.814041	8.52848	1.1e-09	2e-08	11.6337	FBgn0015038	CG4485	Cyp9b1	Cytochrome P450-9b1	35634	4497 // monooxygenase activity // inferred from electronic annotation /// 16491 // oxidoreductase activity // inferred from electronic annotation /// 5506 // iron ion binding // inferred from electronic annotation /// 20037 // heme binding // inferred from electronic annotation /// 46872 // metal ion binding // inferred from electronic annotation	6118 // electron transport // inferred from electronic annotation	5792 // microsome // non-traceable author statement /// 16020 // membrane // non-traceable author statement /// 5783 // endoplasmic reticulum // inferred from electronic annotation /// 5792 // microsome // inferred from electronic annotation /// 16020 // membrane // inferred from electronic annotation	IPR001128 // Cytochrome P450 // 1.1E-50
10239	151438_at	0.801233	1.17947	8.59979	9.15e-10	1.69e-08	11.8216	FBgn0028509	CG31811	cenG1A	centaurin gamma 1A	34803	5525 // GTP binding // inferred from electronic annotation /// 8060 // ARF GTPase activator activity // inferred from sequence or structural similarity /// 8060 // ARF GTPase activator activity // non-traceable author statement /// 5515 // protein binding // inferred from physical interaction /// 166 // nucleotide binding // inferred from electronic annotation /// 5096 // GTPase activator activit…	7186 // G-protein coupled receptor protein signaling pathway // inferred from electronic annotation /// 7264 // small GTPase mediated signal transduction // non-traceable author statement /// 43087 // regulation of GTPase activity // inferred from electronic annotation /// 7264 // small GTPase mediated signal transduction // inferred from electronic annotation	5634 // nucleus // non-traceable author statement	IPR001164 // Human Rev interacting-like protein (hRIP) // 2.8E-52 /// IPR002110 // Ankyrin // 7.5E-6 /// IPR001806 // Ras GTPase superfamily // 4.2E-9 /// IPR001849 // Pleckstrin-like // 2.7E-16
1707	142906_at	0.801019	1.15085	7.66615	1.09e-08	1.59e-07	9.31216	FBgn0036053	CG6718	CG6718	CG6718	39160	45735 // nutrient reservoir activity // inferred from electronic annotation /// 47499 // calcium-independent phospholipase A2 activity // inferred from sequence or structural similarity /// 47499 // calcium-independent phospholipase A2 activity // inferred from sequence similarity	6644 // phospholipid metabolism // inferred from electronic annotation /// 6629 // lipid metabolism // inferred from electronic annotation	5829 // cytosol // inferred from sequence or structural similarity /// 5829 // cytosol // inferred from sequence similarity	IPR002641 // Patatin // 6.3E-54 /// IPR002110 // Ankyrin // 0.53 /// IPR002110 // Ankyrin // 2.2E-8 /// IPR002110 // Ankyrin // 0.028 /// IPR002110 // Ankyrin // 5.8E-7 /// IPR002110 // Ankyrin // 3.2E-6 /// IPR002641 // Patatin // 6.3E-54 /// IPR002110 // Ankyrin // 0.53 /// IPR002110 // Ankyrin // 2.2E-8 /// IPR002110 // Ankyrin // 0.028 /// IPR002110 // Ankyrin // 5.8E-7 /// IPR002110 // Ankyr…
10102	151301_at	0.796486	5.35617	10.0583	2.38e-11	5.99e-10	15.5214	FBgn0040827	CG13315	CG13315	CG13315	50300	---	---	---	---
11169	152368_at	0.794564	3.31013	10.8623	3.58e-12	1.1e-10	17.4425	FBgn0038465	CG8913	CG8913	CG8913	42049	4601 // peroxidase activity // inferred from sequence or structural similarity /// 4601 // peroxidase activity // inferred from electronic annotation /// 5506 // iron ion binding // inferred from electronic annotation /// 16491 // oxidoreductase activity // inferred from electronic annotation /// 46872 // metal ion binding // inferred from electronic annotation /// 4601 // peroxidase activity // …	6800 // oxygen and reactive oxygen species metabolism // inferred from electronic annotation /// 6952 // defense response // inferred from electronic annotation	---	IPR002007 // Animal haem peroxidase // 1.1E-41 /// IPR002007 // Animal haem peroxidase // 7.5E-30
11673	152872_at	0.791782	0.557568	13.0535	3.07e-14	1.32e-12	22.2691	FBgn0033215	CG1942	CG1942	CG1942	35719	---	7498 // mesoderm development // non-traceable author statement	---	IPR007130 // Diacylglycerol acyltransferase // 1.0E-126
3947	145146_at	0.788224	2.35994	10.218	1.62e-11	4.28e-10	15.9097	FBgn0026666	CG8198	l(1)G0136	lethal (1) G0136	32513	5515 // protein binding // inferred from physical interaction	---	---	IPR000361 // Protein of unknown function, HesB/YadR/YfhF // 3.1E-50
2595	143794_at	0.787443	2.20264	9.67395	6.06e-11	1.39e-09	14.5734	FBgn0015299	CG8396	Ssb-c31a	Single stranded-binding protein c31A	34120	3697 // single-stranded DNA binding // inferred from sequence or structural similarity /// 3697 // single-stranded DNA binding // non-traceable author statement /// 3713 // transcription coactivator activity // inferred from sequence or structural similarity /// 3677 // DNA binding // inferred from electronic annotation /// 3713 // transcription coactivator activity // inferred from electronic an…	6357 // regulation of transcription from RNA polymerase II promoter // inferred from sequence or structural similarity /// 6350 // transcription // inferred from electronic annotation /// 6355 // regulation of transcription, DNA-dependent // inferred from electronic annotation /// 6357 // regulation of transcription from RNA polymerase II promoter // inferred from sequence similarity	5667 // transcription factor complex // inferred from sequence or structural similarity /// 5634 // nucleus // inferred from electronic annotation /// 5667 // transcription factor complex // inferred from sequence similarity	IPR003173 // Transcriptional coactivator p15 // 2.4E-16 /// IPR003173 // Transcriptional coactivator p15 // 5.4E-7
533	141732_at	0.785112	3.22404	7.46965	1.87e-08	2.61e-07	8.77115	FBgn0004210	CG7850	puc	puckered	40958	4721 // phosphoprotein phosphatase activity // inferred from direct assay /// 4725 // protein tyrosine phosphatase activity // inferred from sequence or structural similarity /// 8138 // protein tyrosine/serine/threonine phosphatase activity // inferred from sequence or structural similarity /// 8138 // protein tyrosine/serine/threonine phosphatase activity // non-traceable author statement /// 8…	165 // MAPKKK cascade // inferred from electronic annotation /// 1736 // establishment of planar polarity // non-traceable author statement /// 6470 // protein amino acid dephosphorylation // inferred from direct assay /// 6470 // protein amino acid dephosphorylation // inferred from sequence or structural similarity /// 6470 // protein amino acid dephosphorylation // non-traceable author stateme…	---	IPR000340 // Dual specificity protein phosphatase // 2.4E-45
10246	151445_at	0.782456	3.91259	8.03366	4.07e-09	6.5e-08	10.3124	FBgn0040985	CG6115	CG6115	CG6115	50459	---	---	---	IPR008011 // Complex 1 LYR protein // 6.7E-21
11691	152890_at	0.780966	3.78132	10.7791	4.34e-12	1.3e-10	17.2477	FBgn0038088	CG10126	CG10126	CG10126	41579	5509 // calcium ion binding // inferred from sequence or structural similarity /// 5515 // protein binding // inferred from physical interaction /// 5509 // calcium ion binding // inferred from electronic annotation /// 5509 // calcium ion binding // inferred from sequence similarity	---	---	IPR002048 // Calcium-binding EF-hand // 0.0019 /// IPR002048 // Calcium-binding EF-hand // 3.1E-5 /// IPR002048 // Calcium-binding EF-hand // 2.6E-5 /// IPR002048 // Calcium-binding EF-hand // 0.17 /// IPR002048 // Calcium-binding EF-hand // 0.0019 /// IPR002048 // Calcium-binding EF-hand // 3.1E-5 /// IPR002048 // Calcium-binding EF-hand // 2.6E-5 /// IPR002048 // Calcium-binding EF-hand // 0.17
10710	151909_at	0.778745	3.14807	9.83312	4.1e-11	9.85e-10	14.9683	FBgn0032350	CG6287	CG6287	CG6287	34554	4617 // phosphoglycerate dehydrogenase activity // inferred from sequence or structural similarity /// 16616 // oxidoreductase activity, acting on the CH-OH group of donors, NAD or NADP as acceptor // inferred from electronic annotation /// 51287 // NAD binding // inferred from electronic annotation /// 4617 // phosphoglycerate dehydrogenase activity // inferred from sequence similarity	5975 // carbohydrate metabolism // inferred from electronic annotation /// 6564 // L-serine biosynthesis // inferred from electronic annotation /// 8652 // amino acid biosynthesis // inferred from electronic annotation /// 8152 // metabolism // inferred from electronic annotation	---	IPR006140 // D-isomer specific 2-hydroxyacid dehydrogenase, NAD binding domain // 5.7E-75 /// IPR006139 // D-isomer specific 2-hydroxyacid dehydrogenase, catalytic domain // 3.2E-25
11182	152381_at	0.775272	1.31274	11.5077	8.31e-13	2.83e-11	18.925	FBgn0020388	CG4107	Pcaf	Pcaf	39431	4402 // histone acetyltransferase activity // inferred from sequence or structural similarity /// 4402 // histone acetyltransferase activity // non-traceable author statement /// 5515 // protein binding // inferred from physical interaction /// 8080 // N-acetyltransferase activity // inferred from electronic annotation /// 4402 // histone acetyltransferase activity // inferred from sequence simil…	6357 // regulation of transcription from RNA polymerase II promoter // inferred from electronic annotation	124 // SAGA complex // inferred from sequence or structural similarity /// 5700 // polytene chromosome // inferred from direct assay /// 124 // SAGA complex // inferred from sequence similarity	IPR000182 // GCN5-related N-acetyltransferase // 9.5E-17 /// IPR001487 // Bromodomain // 6.3E-38 /// IPR009464 // PCAF, N-terminal // 1.0E-126
10340	151539_at	0.773995	2.82661	9.70839	5.57e-11	1.29e-09	14.6591	FBgn0050359	CG30359	CG30359	CG30359	35828	4556 // alpha-amylase activity // inferred from electronic annotation /// 5215 // transporter activity // inferred from electronic annotation /// 15926 // glucosidase activity // inferred from electronic annotation /// 16787 // hydrolase activity // inferred from electronic annotation	5975 // carbohydrate metabolism // inferred from electronic annotation	---	IPR006047 // Alpha amylase, catalytic domain // 1.0E-126
8595	149794_at	0.771977	4.21484	7.74536	8.83e-09	1.31e-07	9.52904	FBgn0038074	CG6188	CG6188	CG6188	41561	17174 // glycine N-methyltransferase activity // inferred from sequence or structural similarity /// 8168 // methyltransferase activity // inferred from electronic annotation /// 8757 // S-adenosylmethionine-dependent methyltransferase activity // inferred from electronic annotation /// 16740 // transferase activity // inferred from electronic annotation /// 17174 // glycine N-methyltransferase a…	8652 // amino acid biosynthesis // inferred from electronic annotation	---	---
537	141736_at	0.771796	1.44987	7.01156	6.62e-08	8.4e-07	7.49451	FBgn0039525	CG5646	CG5646	CG5646	43311	5386 // carrier activity // inferred from sequence or structural similarity /// 5488 // binding // inferred from electronic annotation /// 5386 // carrier activity // inferred from sequence similarity	6629 // lipid metabolism // inferred from electronic annotation /// 6869 // lipid transport // inferred from electronic annotation /// 6810 // transport // inferred from electronic annotation	5740 // mitochondrial envelope // inferred from sequence or structural similarity /// 5743 // mitochondrial inner membrane // inferred from electronic annotation /// 16020 // membrane // inferred from electronic annotation /// 16021 // integral to membrane // inferred from electronic annotation /// 5740 // mitochondrial envelope // inferred from sequence similarity	IPR001993 // Mitochondrial substrate carrier // 1.0E-13 /// IPR001993 // Mitochondrial substrate carrier // 3.7E-20 /// IPR001993 // Mitochondrial substrate carrier // 7.7E-25
8560	149759_at	0.768627	0.678301	10.2717	1.43e-11	3.82e-10	16.0396	FBgn0010041	CG12242	GstD5	Glutathione S transferase D5	48338	4364 // glutathione transferase activity // inferred from sequence or structural similarity /// 4364 // glutathione transferase activity // non-traceable author statement /// 4364 // glutathione transferase activity // inferred from sequence similarity	---	---	IPR004046 // Glutathione S-transferase, C-terminal // 1.9E-10 /// IPR004045 // Glutathione S-transferase, N-terminal // 9.0E-17
877	142076_at	0.765602	1.24322	9.15695	2.2e-10	4.55e-09	13.2676	---	---	---	---	---	---	---	---	---
2204	143403_at	0.764896	2.00894	8.5996	9.16e-10	1.69e-08	11.8211	FBgn0003975	CG3830	vg	vestigial	36421	5198 // structural molecule activity // inferred from electronic annotation	7018 // microtubule-based movement // inferred from electronic annotation /// 7476 // wing morphogenesis // non-traceable author statement /// 7476 // wing morphogenesis // traceable author statement /// 8587 // wing margin morphogenesis // non-traceable author statement	5634 // nucleus // non-traceable author statement /// 5874 // microtubule // inferred from electronic annotation	---
10623	151822_at	0.764738	2.08941	5.99874	1.16e-06	1.12e-05	4.6114	FBgn0014018	CG11992	Rel	Relish	41087	3700 // transcription factor activity // non-traceable author statement /// 3700 // transcription factor activity // traceable author statement /// 3704 // specific RNA polymerase II transcription factor activity // non-traceable author statement /// 5515 // protein binding // inferred from physical interaction /// 30528 // transcription regulator activity // inferred from electronic annotation /…	6357 // regulation of transcription from RNA polymerase II promoter // inferred from electronic annotation /// 6955 // immune response // inferred from expression pattern /// 6955 // immune response // traceable author statement /// 6963 // antibacterial polypeptide induction // inferred from expression pattern /// 6963 // antibacterial polypeptide induction // inferred from mutant phenotype /// …	5634 // nucleus // inferred from direct assay /// 5634 // nucleus // non-traceable author statement /// 5737 // cytoplasm // inferred from direct assay /// 5739 // mitochondrion // inferred from sequence or structural similarity /// 5739 // mitochondrion // inferred from electronic annotation /// 5634 // nucleus // inferred from electronic annotation	IPR000451 // NF-kappa-B/Rel/dorsal // 1.1E-98 /// IPR002110 // Ankyrin // 4.1E-7 /// IPR002110 // Ankyrin // 3.9E-4 /// IPR002110 // Ankyrin // 3.5E-5 /// IPR002110 // Ankyrin // 0.058 /// IPR002110 // Ankyrin // 6.7 /// IPR002909 // Cell surface receptor IPT/TIG // 5.5E-8 /// IPR000451 // NF-kappa-B/Rel/dorsal // 1.1E-98 /// IPR002110 // Ankyrin // 4.1E-7 /// IPR002110 // Ankyrin // 3.9E-4 /// I…
9242	150441_at	0.760519	2.83644	9.88074	3.66e-11	8.88e-10	15.0859	FBgn0039074	CG6784	CG6784	CG6784	42763	4867 // serine-type endopeptidase inhibitor activity // inferred from sequence or structural similarity /// 4867 // serine-type endopeptidase inhibitor activity // inferred from electronic annotation /// 4867 // serine-type endopeptidase inhibitor activity // inferred from sequence similarity	---	---	IPR002223 // Pancreatic trypsin inhibitor (Kunitz) // 4.3E-19 /// IPR002223 // Pancreatic trypsin inhibitor (Kunitz) // 2.8E-19
1927	143126_at	0.759354	1.89772	8.63138	8.43e-10	1.57e-08	11.9047	FBgn0000472	CG10798	dm	diminutive	31310	3677 // DNA binding // inferred from direct assay /// 3700 // transcription factor activity // inferred from direct assay /// 3700 // transcription factor activity // inferred from sequence or structural similarity /// 5515 // protein binding // inferred from physical interaction /// 3677 // DNA binding // inferred from electronic annotation /// 30528 // transcription regulator activity // inferr…	74 // regulation of progression through cell cycle // traceable author statement /// 6355 // regulation of transcription, DNA-dependent // inferred from direct assay /// 8283 // cell proliferation // inferred from expression pattern /// 8361 // regulation of cell size // traceable author statement /// 9792 // embryonic development (sensu Metazoa) // inferred from expression pattern /// 9993 // oo…	5634 // nucleus // inferred from sequence or structural similarity /// 5634 // nucleus // inferred from electronic annotation /// 5634 // nucleus // inferred from sequence similarity	IPR001092 // Basic helix-loop-helix dimerization domain bHLH // 3.7E-13
6251	147450_at	0.758441	1.75223	7.18798	4.06e-08	5.35e-07	7.9886	FBgn0034364	CG5493	CG5493	CG5493	37139	17172 // cysteine dioxygenase activity // inferred from sequence or structural similarity /// 17172 // cysteine dioxygenase activity // inferred from sequence similarity	9063 // amino acid catabolism // inferred from electronic annotation	---	IPR010300 // Cysteine dioxygenase type I // 4.1E-118
2200	143399_at	0.757062	6.13812	6.14641	7.63e-07	7.71e-06	5.03553	FBgn0003943	CG11624	Ubi-p63E	Ubiquitin-63E	38456	5515 // protein binding // inferred from sequence or structural similarity /// 5515 // protein binding // inferred from sequence similarity	6325 // establishment and/or maintenance of chromatin architecture // non-traceable author statement /// 6355 // regulation of transcription, DNA-dependent // non-traceable author statement /// 6464 // protein modification // inferred from sequence or structural similarity /// 6510 // ATP-dependent proteolysis // non-traceable author statement /// 6511 // ubiquitin-dependent protein catabolism //…	5634 // nucleus // non-traceable author statement /// 5737 // cytoplasm // non-traceable author statement	IPR000626 // Ubiquitin // 3.8E-43 /// IPR000626 // Ubiquitin // 3.8E-43 /// IPR000626 // Ubiquitin // 3.8E-43 /// IPR000626 // Ubiquitin // 3.8E-43 /// IPR000626 // Ubiquitin // 3.8E-43 /// IPR000626 // Ubiquitin // 3.8E-43 /// IPR000626 // Ubiquitin // 3.8E-43 /// IPR000626 // Ubiquitin // 3.8E-43 /// IPR000626 // Ubiquitin // 3.8E-43 /// IPR000626 // Ubiquitin // 3.8E-43
11563	152762_at	0.754634	4.74374	8.74765	6.24e-10	1.18e-08	12.2092	FBgn0035917	CG6416	CG6416	CG6416	38988	5515 // protein binding // inferred from electronic annotation	7498 // mesoderm development // inferred from expression pattern	---	IPR001478 // PDZ/DHR/GLGF domain // 3.6E-5 /// IPR001478 // PDZ/DHR/GLGF domain // 2.2E-12
2570	143769_at	0.754392	3.32533	4.64347	5.78e-05	0.000371365	0.720907	FBgn0014863	CG1019	Mlp84B	Muscle LIM protein at 84B	40849	5515 // protein binding // inferred from sequence or structural similarity /// 8270 // zinc ion binding // inferred from electronic annotation /// 5515 // protein binding // inferred from physical interaction /// 46872 // metal ion binding // inferred from electronic annotation /// 5515 // protein binding // inferred from sequence similarity	7498 // mesoderm development // inferred from electronic annotation /// 7519 // striated muscle development // non-traceable author statement /// 8283 // cell proliferation // inferred from electronic annotation /// 30154 // cell differentiation // non-traceable author statement /// 7275 // development // inferred from electronic annotation /// 7519 // striated muscle development // inferred from…	5634 // nucleus // inferred from sequence or structural similarity /// 5634 // nucleus // non-traceable author statement /// 5737 // cytoplasm // non-traceable author statement /// 5634 // nucleus // inferred from electronic annotation /// 5634 // nucleus // inferred from sequence similarity	IPR001781 // Zn-binding protein, LIM // 5.1E-18 /// IPR001781 // Zn-binding protein, LIM // 5.0E-12 /// IPR001781 // Zn-binding protein, LIM // 7.2E-8 /// IPR001781 // Zn-binding protein, LIM // 2.2E-7 /// IPR001781 // Zn-binding protein, LIM // 1.2E-8
10445	151644_at	0.754205	2.46788	10.5332	7.7e-12	2.17e-10	16.6663	FBgn0037615	CG11760	CG11760	CG11760	41036	---	---	---	---
5262	146461_at	0.751115	2.15228	7.34821	2.61e-08	3.56e-07	8.43475	FBgn0032726	CG10621	CG10621	CG10621	35152	8898 // homocysteine S-methyltransferase activity // inferred from electronic annotation /// 16205 // selenocysteine methyltransferase activity // inferred from sequence or structural similarity /// 16205 // selenocysteine methyltransferase activity // inferred from sequence similarity	8652 // amino acid biosynthesis // inferred from electronic annotation	---	IPR003726 // Homocysteine S-methyltransferase // 3.7E-61
9408	150607_at	0.749014	1.46518	8.12074	3.22e-09	5.25e-08	10.5471	FBgn0066101	CG31094	LpR1	LpR1	2768687	5041 // low-density lipoprotein receptor activity // inferred from sequence or structural similarity /// 5509 // calcium ion binding // inferred from electronic annotation /// 8034 // lipoprotein binding // inferred from sequence or structural similarity /// 5041 // low-density lipoprotein receptor activity // inferred from sequence similarity /// 8034 // lipoprotein binding // inferred from sequ…	8203 // cholesterol metabolism // inferred from sequence or structural similarity /// 42953 // lipoprotein transport // inferred from sequence or structural similarity /// 8203 // cholesterol metabolism // inferred from sequence similarity /// 42953 // lipoprotein transport // inferred from sequence similarity	16020 // membrane // inferred from sequence or structural similarity /// 16020 // membrane // inferred from electronic annotation /// 16020 // membrane // inferred from sequence similarity	IPR006209 // EGF-like domain // 2.5E-7 /// IPR002172 // Low density lipoprotein-receptor, class A // 2.0E-19 /// IPR002172 // Low density lipoprotein-receptor, class A // 4.1E-16 /// IPR002172 // Low density lipoprotein-receptor, class A // 4.2E-18 /// IPR002172 // Low density lipoprotein-receptor, class A // 1.6E-17 /// IPR002172 // Low density lipoprotein-receptor, class A // 4.1E-14 /// IPR002…
8347	149546_at	0.748485	1.54366	10.7208	4.97e-12	1.48e-10	17.1105	FBgn0010803	CG9735	Aats-trp	Tryptophanyl-tRNA synthetase	45399	4830 // tryptophan-tRNA ligase activity // inferred from sequence or structural similarity /// 5524 // ATP binding // inferred from electronic annotation /// 4812 // aminoacyl-tRNA ligase activity // inferred from electronic annotation /// 4830 // tryptophan-tRNA ligase activity // inferred from electronic annotation /// 4830 // tryptophan-tRNA ligase activity // inferred from sequence similarity	6436 // tryptophanyl-tRNA aminoacylation // inferred from sequence or structural similarity /// 6418 // tRNA aminoacylation for protein translation // inferred from electronic annotation /// 6436 // tryptophanyl-tRNA aminoacylation // inferred from electronic annotation /// 6412 // protein biosynthesis // inferred from electronic annotation /// 6436 // tryptophanyl-tRNA aminoacylation // inferred…	---	IPR002305 // Aminoacyl-tRNA synthetase, class Ib // 4.4E-45
8488	149687_at	0.747003	3.06375	10.0529	2.41e-11	6.03e-10	15.5083	FBgn0037899	CG6764	CG6764	CG6764	41372	3676 // nucleic acid binding // inferred from electronic annotation /// 3735 // structural constituent of ribosome // inferred from sequence or structural similarity /// 5515 // protein binding // inferred from physical interaction /// 3735 // structural constituent of ribosome // inferred from electronic annotation /// 3735 // structural constituent of ribosome // inferred from sequence similari…	6412 // protein biosynthesis // inferred from sequence or structural similarity /// 42254 // ribosome biogenesis and assembly // inferred from sequence or structural similarity /// 6412 // protein biosynthesis // inferred from electronic annotation /// 7046 // ribosome biogenesis // inferred from electronic annotation /// 6412 // protein biosynthesis // inferred from sequence similarity /// 42254…	5842 // cytosolic large ribosomal subunit (sensu Eukaryota) // inferred from sequence or structural similarity /// 5622 // intracellular // inferred from electronic annotation /// 5634 // nucleus // inferred from electronic annotation /// 5840 // ribosome // inferred from electronic annotation /// 5842 // cytosolic large ribosomal subunit (sensu Eukaryota) // inferred from sequence similarity	IPR000988 // Ribosomal protein L24E // 3.6E-33
11761	152960_i_at	0.74648	4.3733	7.8138	7.34e-09	1.11e-07	9.71587	FBgn0037888	CG17210	scpr-B	SCP-containing protein B	41357	5515 // protein binding // inferred from physical interaction	---	5576 // extracellular region // inferred from electronic annotation	IPR001283 // Allergen V5/Tpx-1 related // 1.3E-27
12755	153954_at	0.744995	2.72082	12.0736	2.41e-13	8.85e-12	20.1823	FBgn0027865	CG6120	Tsp96F	Tetraspanin 96F	43127	5102 // receptor binding // inferred from electronic annotation	7165 // signal transduction // inferred from electronic annotation /// 16337 // cell-cell adhesion // inferred from electronic annotation /// 19724 // B cell mediated immunity // inferred from electronic annotation	16021 // integral to membrane // inferred from sequence or structural similarity /// 16021 // integral to membrane // inferred from electronic annotation /// 16021 // integral to membrane // inferred from sequence similarity	IPR000301 // CD9/CD37/CD63 antigen // 2.5E-79
12764	153963_at	0.744885	1.75649	9.00258	3.25e-10	6.52e-09	12.8709	FBgn0053229	CG33229	CG33229	CG33229	2768996	---	---	---	---
11295	152494_at	0.744681	3.67771	4.05936	0.000303503	0.00156532	-0.909737	FBgn0033065	CG8345	Cyp6w1	Cyp6w1	35543	4497 // monooxygenase activity // inferred from electronic annotation /// 16491 // oxidoreductase activity // inferred from electronic annotation /// 5506 // iron ion binding // inferred from electronic annotation /// 20037 // heme binding // inferred from electronic annotation /// 46872 // metal ion binding // inferred from electronic annotation	6118 // electron transport // inferred from electronic annotation	5792 // microsome // non-traceable author statement /// 16020 // membrane // non-traceable author statement /// 5783 // endoplasmic reticulum // inferred from electronic annotation /// 5792 // microsome // inferred from electronic annotation /// 16020 // membrane // inferred from electronic annotation	IPR001128 // Cytochrome P450 // 1.7E-89
12659	153858_at	0.744414	3.69676	5.48591	5.1e-06	4.23e-05	3.13432	FBgn0000308	CG9553	chic	chickadee	33834	3779 // actin binding // inferred from sequence or structural similarity /// 3779 // actin binding // non-traceable author statement /// 5200 // structural constituent of cytoskeleton // inferred from electronic annotation /// 5546 // phosphatidylinositol-4,5-bisphosphate binding // non-traceable author statement /// 3779 // actin binding // inferred from electronic annotation /// 3779 // actin b…	902 // cellular morphogenesis // inferred from mutant phenotype /// 910 // cytokinesis // inferred from mutant phenotype /// 915 // cytokinesis, contractile ring formation // traceable author statement /// 7015 // actin filament organization // inferred from mutant phenotype /// 7015 // actin filament organization // traceable author statement /// 7283 // spermatogenesis // inferred from mutant p…	15629 // actin cytoskeleton // inferred from electronic annotation /// 5856 // cytoskeleton // inferred from electronic annotation	IPR002097 // Profilin/allergen // 5.8E-66
8656	149855_at	0.741916	1.74254	12.3171	1.43e-13	5.41e-12	20.7112	FBgn0038172	CG9621	Adgf-D	Adenosine deaminase-related growth factor D	41679	4000 // adenosine deaminase activity // inferred from direct assay /// 8083 // growth factor activity // inferred from direct assay /// 19239 // deaminase activity // inferred from electronic annotation	8283 // cell proliferation // inferred from direct assay /// 9168 // purine ribonucleoside monophosphate biosynthesis // inferred from electronic annotation	5615 // extracellular space // non-traceable author statement	IPR001365 // Adenosine/AMP deaminase // 1.3E-47
10562	151761_at	0.741674	2.42372	9.41486	1.15e-10	2.49e-09	13.9233	FBgn0040305	CG3743	MTF-1	MTF-1	39089	3700 // transcription factor activity // non-traceable author statement /// 3704 // specific RNA polymerase II transcription factor activity // non-traceable author statement /// 8270 // zinc ion binding // inferred from electronic annotation /// 3676 // nucleic acid binding // inferred from electronic annotation /// 46872 // metal ion binding // inferred from electronic annotation	6350 // transcription // non-traceable author statement /// 6357 // regulation of transcription from RNA polymerase II promoter // inferred from electronic annotation /// 6875 // metal ion homeostasis // inferred from mutant phenotype /// 8283 // cell proliferation // inferred from electronic annotation	5634 // nucleus // non-traceable author statement /// 5654 // nucleoplasm // inferred from electronic annotation /// 5634 // nucleus // inferred from electronic annotation	IPR007087 // Zn-finger, C2H2 type // 1.7E-5 /// IPR007087 // Zn-finger, C2H2 type // 1.5E-5 /// IPR007087 // Zn-finger, C2H2 type // 4.5E-6 /// IPR007087 // Zn-finger, C2H2 type // 8.8E-7 /// IPR007087 // Zn-finger, C2H2 type // 1.0E-6 /// IPR007087 // Zn-finger, C2H2 type // 2.1E-5 /// IPR007087 // Zn-finger, C2H2 type // 1.0E-6 /// IPR007087 // Zn-finger, C2H2 type // 2.1E-5
3571	144770_at	0.740642	1.6177	9.39347	1.21e-10	2.62e-09	13.8693	FBgn0030158	CG9686	CG9686	CG9686	31921	---	---	---	---
12232	153431_at	0.739978	2.11077	15.2849	4.15e-16	2.73e-14	26.63	FBgn0002641	CG1692	mal	maroon-like	33045	8265 // Mo-molybdopterin cofactor sulfurase activity // non-traceable author statement /// 8483 // transaminase activity // inferred from electronic annotation	6727 // ommochrome biosynthesis // inferred from mutant phenotype /// 6777 // Mo-molybdopterin cofactor biosynthesis // non-traceable author statement /// 8152 // metabolism // inferred from electronic annotation	---	IPR005303 // MOSC N-terminal beta barrel domain // 2.5E-52 /// IPR005302 // MOSC domain // 2.0E-40
7266	148465_at	0.739327	1.59946	9.1908	2.02e-10	4.21e-09	13.3541	FBgn0035996	CG3448	CG3448	CG3448	39094	5515 // protein binding // inferred from physical interaction	---	---	---
12307	153506_at	0.73873	1.94454	16.0232	1.11e-16	8.13e-15	27.9642	FBgn0022029	CG4798	l(2)k01209	lethal (2) k01209	36953	4849 // uridine kinase activity // inferred from sequence or structural similarity /// 5524 // ATP binding // inferred from electronic annotation /// 16757 // transferase activity, transferring glycosyl groups // inferred from electronic annotation /// 19201 // nucleotide kinase activity // inferred from electronic annotation /// 166 // nucleotide binding // inferred from electronic annotation //…	6206 // pyrimidine base metabolism // inferred from electronic annotation /// 9058 // biosynthesis // inferred from electronic annotation	---	IPR006083 // Phosphoribulokinase/uridine kinase // 4.6E-77 /// IPR006083 // Phosphoribulokinase/uridine kinase // 4.6E-77
1332	142531_at	0.738229	2.57666	8.30788	1.97e-09	3.37e-08	11.0483	FBgn0004926	CG4153	eIF-2	Eukaryotic initiation factor 2	39433	49 // tRNA binding // non-traceable author statement /// 3743 // translation initiation factor activity // inferred from sequence or structural similarity /// 3743 // translation initiation factor activity // non-traceable author statement /// 5525 // GTP binding // non-traceable author statement /// 5515 // protein binding // inferred from physical interaction /// 3743 // translation initiation …	1677 // formation of translation initiation ternary complex // non-traceable author statement /// 6413 // translational initiation // inferred from sequence or structural similarity /// 6445 // regulation of translation // inferred from electronic annotation /// 6412 // protein biosynthesis // inferred from electronic annotation /// 6413 // translational initiation // inferred from electronic ann…	5829 // cytosol // inferred from sequence or structural similarity /// 5850 // eukaryotic translation initiation factor 2 complex // inferred from sequence or structural similarity /// 5850 // eukaryotic translation initiation factor 2 complex // non-traceable author statement /// 5829 // cytosol // inferred from sequence similarity /// 5850 // eukaryotic translation initiation factor 2 complex /…	IPR002735 // Translation initiation factor IF5 // 2.7E-74
11352	152551_at	0.732345	4.276	5.65288	3.15e-06	2.76e-05	3.61554	FBgn0030693	CG8974	CG8974	CG8974	32532	4842 // ubiquitin-protein ligase activity // inferred from electronic annotation /// 8270 // zinc ion binding // inferred from electronic annotation /// 30528 // transcription regulator activity // inferred from electronic annotation /// 5515 // protein binding // inferred from electronic annotation /// 46872 // metal ion binding // inferred from electronic annotation	6139 // nucleobase, nucleoside, nucleotide and nucleic acid metabolism // inferred from electronic annotation /// 6366 // transcription from RNA polymerase II promoter // inferred from electronic annotation /// 16567 // protein ubiquitination // inferred from electronic annotation	151 // ubiquitin ligase complex // inferred from electronic annotation	IPR001841 // Zn-finger, RING // 4.6E-13
10484	151683_at	0.726912	4.00123	8.23361	2.39e-09	4.05e-08	10.8499	FBgn0037245	CG14648	CG14648	CG14648	40559	3824 // catalytic activity // inferred from electronic annotation /// 166 // nucleotide binding // inferred from electronic annotation	8152 // metabolism // inferred from electronic annotation	---	IPR002698 // 5-formyltetrahydrofolate cyclo-ligase // 3.0E-60 /// IPR002698 // 5-formyltetrahydrofolate cyclo-ligase // 2.7E-5
489	141688_at	0.725792	2.12815	6.84768	1.05e-07	1.26e-06	7.03301	FBgn0001257	CG15009	ImpL2	Ecdysone-inducible gene L2	38513	5515 // protein binding // inferred from electronic annotation	7155 // cell adhesion // traceable author statement /// 7155 // cell adhesion // inferred from electronic annotation /// 7275 // development // inferred from electronic annotation	5576 // extracellular region // non-traceable author statement	IPR007110 // Immunoglobulin-like // 0.066 /// IPR007110 // Immunoglobulin-like // 4.1E-5 /// IPR007110 // Immunoglobulin-like // 0.066 /// IPR007110 // Immunoglobulin-like // 4.1E-5 /// IPR007110 // Immunoglobulin-like // 0.066 /// IPR007110 // Immunoglobulin-like // 4.1E-5
4361	145560_at	0.724755	1.25678	17.535	8.58e-18	7.86e-16	30.5464	FBgn0031307	CG4726	CG4726	CG4726	33292	5316 // high affinity inorganic phosphate:sodium symporter activity // inferred from sequence or structural similarity /// 5215 // transporter activity // inferred from electronic annotation /// 5316 // high affinity inorganic phosphate:sodium symporter activity // inferred from sequence similarity	5975 // carbohydrate metabolism // inferred from electronic annotation /// 6796 // phosphate metabolism // inferred from electronic annotation /// 6812 // cation transport // inferred from electronic annotation /// 6817 // phosphate transport // inferred from electronic annotation /// 6858 // extracellular transport // inferred from electronic annotation /// 8643 // carbohydrate transport // infe…	16021 // integral to membrane // inferred from electronic annotation /// 16020 // membrane // inferred from electronic annotation	---
4490	145689_at	0.724368	2.12084	6.37383	3.99e-07	4.3e-06	5.68673	FBgn0031501	CG17261	CG17261	CG17261	33522	---	---	---	---
153	141352_at	0.724305	0.641024	9.55768	8.07e-11	1.8e-09	14.2827	FBgn0038071	CG6234	CG6234	CG6234	41558	---	---	---	---
3024	144223_at	0.724203	1.56517	10.3897	1.08e-11	2.96e-10	16.3235	FBgn0028515	CG4930	CG4930	CG4930	34953	---	---	---	---
13917	155116_at	0.724124	1.72508	13.0021	3.41e-14	1.45e-12	22.1624	FBgn0040294	CG4909	POSH	Plenty of SH3s	36990	4842 // ubiquitin-protein ligase activity // inferred from electronic annotation /// 5200 // structural constituent of cytoskeleton // inferred from electronic annotation /// 8270 // zinc ion binding // inferred from electronic annotation /// 30159 // receptor signaling complex scaffold activity // non-traceable author statement /// 5515 // protein binding // inferred from electronic annotation	8103 // oocyte microtubule cytoskeleton polarization // inferred from mutant phenotype /// 8104 // protein localization // inferred from mutant phenotype /// 8340 // determination of adult life span // inferred from mutant phenotype /// 8340 // determination of adult life span // non-traceable author statement /// 16567 // protein ubiquitination // inferred from electronic annotation /// 42052 //…	151 // ubiquitin ligase complex // inferred from electronic annotation	IPR001452 // SH3 // 4.7E-13 /// IPR001452 // SH3 // 6.2E-5 /// IPR001452 // SH3 // 4.8E-10 /// IPR001452 // SH3 // 2.0E-10 /// IPR001841 // Zn-finger, RING // 6.6E-11
12430	153629_at	0.722804	1.00227	10.3084	1.31e-11	3.53e-10	16.1279	FBgn0020270	CG16928	mre11	meiotic recombination 11	34565	3676 // nucleic acid binding // inferred from electronic annotation /// 4519 // endonuclease activity // inferred from sequence or structural similarity /// 4519 // endonuclease activity // non-traceable author statement /// 4520 // endodeoxyribonuclease activity // inferred from electronic annotation /// 4527 // exonuclease activity // inferred from sequence or structural similarity /// 4527 // …	723 // telomere maintenance // inferred from mutant phenotype /// 6289 // nucleotide-excision repair // non-traceable author statement /// 6302 // double-strand break repair // inferred from sequence or structural similarity /// 7001 // chromosome organization and biogenesis (sensu Eukaryota) // inferred from mutant phenotype /// 7126 // meiosis // inferred from electronic annotation /// 6259 // …	5634 // nucleus // inferred from electronic annotation	IPR004843 // Metallo-phosphoesterase // 9.5E-21 /// IPR007281 // Mre11 DNA-binding presumed domain // 1.0E-126
12328	153527_at	0.722615	2.33058	5.63272	3.34e-06	2.91e-05	3.55743	FBgn0030309	CG1572	CG1572	CG1572	32098	---	---	16020 // membrane // inferred from electronic annotation	IPR008253 // Marvel // 1.7E-31
6526	147725_at	0.718501	1.28714	15.4366	3.15e-16	2.15e-14	26.9083	FBgn0034793	CG13533	asrij	asrij	37637	5515 // protein binding // inferred from physical interaction	---	---	IPR009764 // Ovarian carcinoma immunoreactive antigen // 6.9E-82
13975	AFFX-CreX-5_at	0.717733	5.63383	5.66702	3.02e-06	2.66e-05	3.6563	---	---	---	---	---	3677 // DNA binding // inferred from electronic annotation	6310 // DNA recombination // inferred from electronic annotation /// 6313 // DNA transposition // inferred from electronic annotation /// 15074 // DNA integration // inferred from electronic annotation	---	---
9581	150780_at	0.717051	1.37968	10.5202	7.93e-12	2.23e-10	16.6354	FBgn0039593	CG9989	CG9989	CG9989	43390	5515 // protein binding // inferred from physical interaction /// 3676 // nucleic acid binding // inferred from electronic annotation /// 4519 // endonuclease activity // inferred from electronic annotation	---	---	IPR001604 // DNA/RNA non-specific endonuclease // 1.5E-8
4704	145903_at	0.716874	-0.657064	4.25463	0.0001751	0.00098126	-0.370816	FBgn0051638	CG31638	CG31638	CG31638	33910	---	---	16459 // myosin // inferred from sequence or structural similarity /// 16459 // myosin // inferred from sequence similarity	---
11343	152542_at	0.714492	4.84648	2.50716	0.0175395	0.0445968	-4.77916	FBgn0039104	CG10252	CG10252	CG10252	42794	5515 // protein binding // inferred from physical interaction	---	---	IPR010736 // Protein of unknown function DUF1309 // 1.0E-5 /// IPR010736 // Protein of unknown function DUF1309 // 1.2E-9
13561	154760_at	0.714082	1.76254	12.1584	2e-13	7.47e-12	20.3672	FBgn0035589	CG4618	CG4618	CG4618	38599	---	---	---	IPR005024 // Snf7 // 1.2E-59
12859	154058_at	0.710686	2.51867	7.58447	1.37e-08	1.94e-07	9.08778	FBgn0036449	CG5295	CG5295	CG5295	39611	5515 // protein binding // inferred from physical interaction	6629 // lipid metabolism // inferred from electronic annotation	---	IPR002641 // Patatin // 4.6E-38
12599	153798_at	0.706484	2.77582	7.25274	3.39e-08	4.53e-07	8.16923	FBgn0035715	CG10103	CG10103	CG10103	38750	3676 // nucleic acid binding // inferred from electronic annotation /// 4522 // pancreatic ribonuclease activity // inferred from electronic annotation /// 5515 // protein binding // inferred from physical interaction	---	---	IPR005061 // Eukaryotic protein of unknown function DUF292 // 1.7E-75
3608	144807_at	0.705358	1.68034	2.60796	0.0138132	0.03696	-4.55947	FBgn0052687	CG32687	CG32687	CG32687	31980	4672 // protein kinase activity // inferred from electronic annotation /// 4675 // transmembrane receptor protein serine/threonine kinase activity // inferred from electronic annotation /// 4872 // receptor activity // inferred from electronic annotation /// 16301 // kinase activity // inferred from electronic annotation /// 19199 // transmembrane receptor protein kinase activity // inferred from…	6464 // protein modification // inferred from electronic annotation /// 6468 // protein amino acid phosphorylation // inferred from electronic annotation /// 6952 // defense response // inferred from electronic annotation /// 7165 // signal transduction // inferred from electronic annotation /// 7166 // cell surface receptor linked signal transduction // inferred from electronic annotation /// 71…	---	IPR001611 // Leucine-rich repeat // 3.3E-4 /// IPR001611 // Leucine-rich repeat // 2.1E-4 /// IPR001611 // Leucine-rich repeat // 0.0040 /// IPR001611 // Leucine-rich repeat // 0.045 /// IPR001611 // Leucine-rich repeat // 0.23 /// IPR001611 // Leucine-rich repeat // 0.011
235	141434_at	0.698996	3.61886	9.91009	3.4e-11	8.34e-10	15.1581	FBgn0035165	CG13887	CG13887	CG13887	38096	5102 // receptor binding // inferred from electronic annotation /// 5515 // protein binding // inferred from physical interaction	6886 // intracellular protein transport // inferred from electronic annotation /// 6915 // apoptosis // inferred from electronic annotation /// 6952 // defense response // inferred from electronic annotation /// 19724 // B cell mediated immunity // inferred from electronic annotation	5783 // endoplasmic reticulum // inferred from electronic annotation /// 16021 // integral to membrane // inferred from electronic annotation	IPR008417 // B-cell receptor-associated 31-like // 1.3E-123
13060	154259_at	0.698124	1.4134	7.95281	5.05e-09	7.87e-08	10.0937	FBgn0028990	CG11331	Spn27A	Serpin-27A	45815	4857 // enzyme inhibitor activity // inferred from direct assay /// 4867 // serine-type endopeptidase inhibitor activity // inferred from sequence or structural similarity /// 4867 // serine-type endopeptidase inhibitor activity // non-traceable author statement /// 4867 // serine-type endopeptidase inhibitor activity // inferred from electronic annotation /// 4867 // serine-type endopeptidase in…	8063 // Toll signaling pathway // inferred from direct assay /// 9611 // response to wounding // inferred from mutant phenotype /// 9613 // response to pest, pathogen or parasite // inferred from mutant phenotype /// 9950 // dorsal/ventral axis specification // inferred from mutant phenotype /// 35006 // melanization defense response // traceable author statement /// 35009 // negative regulation …	---	IPR000215 // Serpin // 4.8E-74
7548	148747_at	0.693579	3.09285	3.2618	0.00266542	0.00968929	-3.0119	FBgn0036419	CG13482	CG13482	CG13482	39577	---	---	---	---
10895	152094_at	0.693424	1.60693	6.1228	8.16e-07	8.17e-06	4.96777	FBgn0036545	CG17035	GXIVsPLA2	GXIVsPLA2	39734	4623 // phospholipase A2 activity // non-traceable author statement /// 5509 // calcium ion binding // inferred from electronic annotation /// 4623 // phospholipase A2 activity // inferred from electronic annotation	16042 // lipid catabolism // inferred from electronic annotation	5576 // extracellular region // non-traceable author statement /// 5576 // extracellular region // inferred from electronic annotation	IPR010711 // Group XII secretory phospholipase A2 // 6.4E-15 /// IPR010711 // Group XII secretory phospholipase A2 // 6.4E-15
6298	147497_at	0.692769	3.37849	7.53839	1.55e-08	2.19e-07	8.96089	FBgn0034443	CG10460	cer	crammer	37229	4869 // cysteine protease inhibitor activity // inferred from direct assay	7616 // long-term memory // inferred from mutant phenotype	---	---
365	141564_at	0.691291	1.91181	9.8694	3.76e-11	9.09e-10	15.0579	FBgn0037391	CG2017	CG2017	CG2017	40733	5525 // GTP binding // inferred from sequence or structural similarity /// 5515 // protein binding // inferred from physical interaction /// 5525 // GTP binding // inferred from electronic annotation /// 5525 // GTP binding // inferred from sequence similarity	6412 // protein biosynthesis // inferred from electronic annotation	---	IPR004161 // Elongation factor Tu, domain 2 // 9.8E-9 /// IPR004161 // Elongation factor Tu, domain 2 // 9.8E-9
10443	151642_at	0.689241	2.49481	8.34517	1.78e-09	3.08e-08	11.1477	FBgn0037813	CG17100	CG17100	CG17100	44669	3677 // DNA binding // inferred from electronic annotation /// 3702 // RNA polymerase II transcription factor activity // non-traceable author statement /// 30528 // transcription regulator activity // inferred from electronic annotation	6355 // regulation of transcription, DNA-dependent // inferred from electronic annotation /// 45449 // regulation of transcription // inferred from sequence or structural similarity /// 7275 // development // inferred from electronic annotation /// 30154 // cell differentiation // inferred from electronic annotation /// 45449 // regulation of transcription // inferred from electronic annotation /…	5634 // nucleus // non-traceable author statement /// 5634 // nucleus // inferred from electronic annotation	IPR001092 // Basic helix-loop-helix dimerization domain bHLH // 1.1E-14
6348	147547_at	0.68392	5.59971	5.29801	8.77e-06	6.87e-05	2.5931	FBgn0034512	CG18067	CG18067	CG18067	37314	---	---	---	---
12756	153955_at	0.682673	3.24487	4.54899	7.58e-05	0.000473599	0.453729	FBgn0025381	CG14782	CG14782	CG14782	31105	5085 // guanyl-nucleotide exchange factor activity // inferred from sequence or structural similarity /// 8270 // zinc ion binding // inferred from electronic annotation /// 5085 // guanyl-nucleotide exchange factor activity // inferred from sequence similarity	1501 // skeletal development // inferred from electronic annotation /// 7010 // cytoskeleton organization and biogenesis // inferred from electronic annotation /// 7498 // mesoderm development // inferred from electronic annotation	---	IPR001849 // Pleckstrin-like // 2.2E-19 /// IPR000306 // Zn-finger, FYVE type // 1.1E-26
10867	152066_at	0.680129	1.33622	8.08418	3.55e-09	5.76e-08	10.4486	FBgn0027092	CG10687	Aats-asn	Asparaginyl-tRNA synthetase	35194	3729 // mRNA binding // inferred from electronic annotation /// 4815 // aspartate-tRNA ligase activity // inferred from electronic annotation /// 4816 // asparagine-tRNA ligase activity // inferred from sequence or structural similarity /// 4816 // asparagine-tRNA ligase activity // non-traceable author statement /// 5524 // ATP binding // inferred from electronic annotation /// 3676 // nucleic a…	6421 // asparaginyl-tRNA aminoacylation // non-traceable author statement /// 6422 // aspartyl-tRNA aminoacylation // inferred from electronic annotation /// 6418 // tRNA aminoacylation for protein translation // inferred from electronic annotation /// 6421 // asparaginyl-tRNA aminoacylation // inferred from electronic annotation	5737 // cytoplasm // inferred from electronic annotation	IPR004365 // OB-fold nucleic acid binding domain // 3.1E-23 /// IPR004364 // tRNA synthetase, class II (D, K and N) // 4.3E-126
368	141567_at	0.676617	1.69009	9.64235	6.55e-11	1.49e-09	14.4946	FBgn0028894	CG5869	CG5869	CG5869	34963	3779 // actin binding // inferred from sequence or structural similarity /// 5200 // structural constituent of cytoskeleton // inferred from electronic annotation /// 5515 // protein binding // inferred from physical interaction /// 3779 // actin binding // inferred from electronic annotation /// 8083 // growth factor activity // inferred from electronic annotation /// 3779 // actin binding // in…	7398 // ectoderm development // inferred from electronic annotation /// 42063 // gliogenesis // inferred from sequence or structural similarity /// 42063 // gliogenesis // inferred from sequence similarity	5622 // intracellular // inferred from electronic annotation	IPR002108 // Actin-binding, cofilin/tropomyosin type // 6.3E-19
611	141810_at	0.676601	6.37616	6.07111	9.46e-07	9.36e-06	4.81937	FBgn0010352	CG11661	Nc73EF	Neural conserved at 73EF	39899	4591 // oxoglutarate dehydrogenase (succinyl-transferring) activity // inferred from sequence or structural similarity /// 4591 // oxoglutarate dehydrogenase (succinyl-transferring) activity // inferred from electronic annotation /// 16624 // oxidoreductase activity, acting on the aldehyde or oxo group of donors, disulfide as acceptor // inferred from electronic annotation /// 30976 // thiamin py…	6099 // tricarboxylic acid cycle // inferred from sequence or structural similarity /// 6096 // glycolysis // inferred from electronic annotation /// 8152 // metabolism // inferred from electronic annotation /// 6099 // tricarboxylic acid cycle // inferred from sequence similarity	9353 // oxoglutarate dehydrogenase complex (sensu Eukaryota) // inferred from sequence or structural similarity /// 9353 // oxoglutarate dehydrogenase complex (sensu Eukaryota) // inferred from sequence similarity	IPR005475 // Transketolase, central region // 7.4E-67 /// IPR001017 // Dehydrogenase, E1 component // 3.3E-112 /// IPR001017 // Dehydrogenase, E1 component // 1.9E-96 /// IPR005475 // Transketolase, central region // 7.4E-67 /// IPR005475 // Transketolase, central region // 7.4E-67 /// IPR001017 // Dehydrogenase, E1 component // 3.3E-112
3088	144287_at	0.670592	5.10335	3.15633	0.00351038	0.0121645	-3.2743	FBgn0028883	CG4959	CG4959	CG4959	50457	---	---	---	---
12238	153437_at	0.669878	2.42854	6.89807	9.09e-08	1.11e-06	7.17517	FBgn0040064	CG4600	yip2	yippee interacting protein 2	34313	3988 // acetyl-CoA C-acyltransferase activity // inferred from sequence or structural similarity /// 5515 // protein binding // inferred from physical interaction /// 8415 // acyltransferase activity // inferred from electronic annotation /// 16740 // transferase activity // inferred from electronic annotation /// 3988 // acetyl-CoA C-acyltransferase activity // inferred from sequence similarity	6635 // fatty acid beta-oxidation // inferred from sequence or structural similarity /// 6635 // fatty acid beta-oxidation // inferred from sequence similarity	5739 // mitochondrion // inferred from sequence or structural similarity /// 5739 // mitochondrion // inferred from sequence similarity	IPR002155 // Thiolase // 1.7E-67 /// IPR002155 // Thiolase // 3.7E-99
12825	154024_at	0.668513	3.8093	7.94255	5.19e-09	8.06e-08	10.0659	FBgn0015268	CG5330	Nap1	Nucleosome assembly protein 1	37798	42393 // histone binding // inferred from direct assay /// 42393 // histone binding // traceable author statement /// 5515 // protein binding // inferred from physical interaction	6334 // nucleosome assembly // inferred from direct assay /// 6334 // nucleosome assembly // inferred from sequence or structural similarity /// 6334 // nucleosome assembly // non-traceable author statement /// 6355 // regulation of transcription, DNA-dependent // inferred from direct assay /// 6461 // protein complex assembly // inferred from electronic annotation /// 6334 // nucleosome assembly…	5634 // nucleus // inferred from direct assay /// 5737 // cytoplasm // inferred from direct assay /// 16590 // ACF complex // inferred from direct assay /// 5634 // nucleus // inferred from electronic annotation	IPR002164 // Nucleosome assembly protein (NAP) // 1.0E-126
11780	152979_at	0.66709	2.33138	10.1831	1.76e-11	4.58e-10	15.8253	FBgn0051531	CG31531	CG31531	CG31531	40583	---	---	---	---
394	141593_at	0.666457	1.51781	10.7936	4.2e-12	1.27e-10	17.2816	FBgn0038862	CG5798	CG5798	CG5798	42509	4197 // cysteine-type endopeptidase activity // inferred from electronic annotation /// 4221 // ubiquitin thiolesterase activity // inferred from electronic annotation /// 4843 // ubiquitin-specific protease activity // inferred from sequence or structural similarity /// 4843 // ubiquitin-specific protease activity // inferred from sequence similarity	6508 // proteolysis // inferred from electronic annotation /// 6511 // ubiquitin-dependent protein catabolism // inferred from electronic annotation /// 16579 // protein deubiquitination // inferred from sequence or structural similarity /// 16579 // protein deubiquitination // inferred from sequence similarity	---	IPR001394 // Peptidase C19, ubiquitin carboxyl-terminal hydrolase family 2 // 1.0E-126
1035	142234_at	0.663937	0.932627	8.61741	8.75e-10	1.62e-08	11.8679	FBgn0034915	CG17611	eIF6	eIF6	37776	3743 // translation initiation factor activity // inferred from sequence or structural similarity /// 3743 // translation initiation factor activity // inferred from electronic annotation /// 3743 // translation initiation factor activity // inferred from sequence similarity	6412 // protein biosynthesis // non-traceable author statement /// 6413 // translational initiation // inferred from sequence or structural similarity /// 6412 // protein biosynthesis // inferred from electronic annotation /// 6413 // translational initiation // inferred from electronic annotation /// 6413 // translational initiation // inferred from sequence similarity	5829 // cytosol // inferred from sequence or structural similarity /// 5829 // cytosol // non-traceable author statement /// 5634 // nucleus // inferred from electronic annotation /// 5829 // cytosol // inferred from sequence similarity	IPR002769 // Translation initiation factor IF6 // 1.0E-126
13541	154740_at	0.663556	1.46924	14.0393	4.31e-15	2.24e-13	24.2597	FBgn0051793	CG31793	CG31793	CG31793	326161	166 // nucleotide binding // inferred from electronic annotation /// 5215 // transporter activity // inferred from sequence or structural similarity /// 5524 // ATP binding // inferred from electronic annotation /// 42626 // ATPase activity, coupled to transmembrane movement of substances // inferred from sequence or structural similarity /// 16887 // ATPase activity // inferred from electronic a…	6810 // transport // inferred from sequence or structural similarity /// 6858 // extracellular transport // inferred from electronic annotation /// 6952 // defense response // inferred from electronic annotation /// 9636 // response to toxin // inferred from electronic annotation /// 6810 // transport // inferred from electronic annotation /// 6810 // transport // inferred from sequence similarity	16021 // integral to membrane // inferred from electronic annotation /// 43190 // ATP-binding cassette (ABC) transporter complex // inferred from sequence or structural similarity /// 16020 // membrane // inferred from electronic annotation /// 43190 // ATP-binding cassette (ABC) transporter complex // inferred from sequence similarity	IPR001140 // ABC transporter, transmembrane region // 6.1E-20 /// IPR001140 // ABC transporter, transmembrane region // 3.3E-21 /// IPR003439 // ABC transporter // 1.7E-49 /// IPR003439 // ABC transporter // 5.5E-45
1926	143125_at	0.663216	2.23605	8.96878	3.54e-10	7.06e-09	12.7837	FBgn0000462	CG6667	dl	dorsal	35047	3677 // DNA binding // non-traceable author statement /// 3700 // transcription factor activity // inferred from sequence or structural similarity /// 3700 // transcription factor activity // non-traceable author statement /// 3702 // RNA polymerase II transcription factor activity // traceable author statement /// 5515 // protein binding // inferred from physical interaction /// 16015 // morphog…	122 // negative regulation of transcription from RNA polymerase II promoter // traceable author statement /// 381 // regulation of alternative nuclear mRNA splicing, via spliceosome // inferred from mutant phenotype /// 1715 // ectodermal cell fate specification // traceable author statement /// 6355 // regulation of transcription, DNA-dependent // inferred from sequence or structural similarity …	5634 // nucleus // Unknown /// 5634 // nucleus // inferred from direct assay /// 5634 // nucleus // non-traceable author statement /// 5634 // nucleus // traceable author statement /// 5737 // cytoplasm // inferred from direct assay /// 5737 // cytoplasm // non-traceable author statement /// 5737 // cytoplasm // traceable author statement /// 5634 // nucleus // inferred from electronic annotation…	IPR000451 // NF-kappa-B/Rel/dorsal // 5.1E-105 /// IPR002909 // Cell surface receptor IPT/TIG // 2.4E-17
11026	152225_at	0.662895	2.67932	6.39937	3.71e-07	4.03e-06	5.75969	FBgn0020545	CG3943	kraken	kraken	33265	17171 // serine hydrolase activity // non-traceable author statement /// 3824 // catalytic activity // inferred from electronic annotation /// 4759 // serine esterase activity // inferred from electronic annotation /// 16787 // hydrolase activity // inferred from electronic annotation	6725 // aromatic compound metabolism // inferred from electronic annotation /// 7586 // digestion // inferred from expression pattern /// 9636 // response to toxin // inferred from expression pattern /// 6805 // xenobiotic metabolism // inferred from electronic annotation /// 7275 // development // inferred from electronic annotation /// 7586 // digestion // inferred from electronic annotation //…	---	---
12640	153839_at	0.662303	3.07774	7.33023	2.74e-08	3.73e-07	8.38483	FBgn0020250	CG6072	sra	sarah	47384	5102 // receptor binding // inferred from electronic annotation /// 166 // nucleotide binding // inferred from electronic annotation	7127 // meiosis I // non-traceable author statement /// 7616 // long-term memory // inferred from mutant phenotype /// 8355 // olfactory learning // inferred from mutant phenotype /// 19722 // calcium-mediated signaling // inferred from electronic annotation /// 45924 // regulation of female receptivity // inferred from mutant phenotype /// 46008 // regulation of female receptivity, post-mating /…	---	IPR006931 // Calcipressin // 1.8E-85
12380	153579_at	0.659655	0.884565	11.5959	6.83e-13	2.35e-11	19.1235	FBgn0011703	CG5371	RnrL	Ribonucleoside diphosphate reductase large subunit	34392	4748 // ribonucleoside-diphosphate reductase activity // inferred from sequence or structural similarity /// 4748 // ribonucleoside-diphosphate reductase activity // non-traceable author statement /// 166 // nucleotide binding // inferred from electronic annotation /// 3824 // catalytic activity // inferred from electronic annotation /// 4748 // ribonucleoside-diphosphate reductase activity // in…	6144 // purine base metabolism // inferred from electronic annotation /// 6206 // pyrimidine base metabolism // inferred from electronic annotation /// 6260 // DNA replication // non-traceable author statement /// 6260 // DNA replication // inferred from electronic annotation	5971 // ribonucleoside-diphosphate reductase complex // inferred from sequence or structural similarity /// 5971 // ribonucleoside-diphosphate reductase complex // inferred from electronic annotation /// 5971 // ribonucleoside-diphosphate reductase complex // inferred from sequence similarity	IPR000788 // Ribonucleotide reductase large subunit // 1.0E-126 /// IPR005144 // ATP cone domain // 5.1E-26 /// IPR000788 // Ribonucleotide reductase large subunit // 8.8E-34
10615	151814_at	0.658859	1.44753	7.01052	6.64e-08	8.41e-07	7.49159	FBgn0035714	CG8549	CG8549	CG8549	38749	---	---	---	IPR002140 // Protein of unknown function UPF0023 // 3.6E-102 /// IPR002140 // Protein of unknown function UPF0023 // 2.0E-100
11522	152721_at	0.658606	2.66617	10.1953	1.71e-11	4.48e-10	15.8548	FBgn0020416	CG4472	Idgf1	Imaginal disc growth factor 1	34978	4568 // chitinase activity // inferred from sequence or structural similarity /// 8084 // imaginal disc growth factor activity // inferred from direct assay /// 16799 // hydrolase activity, hydrolyzing N-glycosyl compounds // inferred from electronic annotation /// 4553 // hydrolase activity, hydrolyzing O-glycosyl compounds // inferred from electronic annotation /// 4568 // chitinase activity //…	7165 // signal transduction // inferred from electronic annotation /// 7267 // cell-cell signaling // inferred from electronic annotation /// 7444 // imaginal disc development // inferred from direct assay /// 8152 // metabolism // inferred from electronic annotation /// 5975 // carbohydrate metabolism // inferred from electronic annotation /// 6032 // chitin catabolism // inferred from electroni…	5576 // extracellular region // inferred from direct assay /// 5576 // extracellular region // non-traceable author statement	IPR001223 // Glycoside hydrolase, family 18 // 7.9E-86
2127	143326_at	0.658531	5.49756	3.57985	0.00114003	0.00482388	-2.19615	FBgn0003274	CG4918	RpLP2	Ribosomal protein LP2	36855	3676 // nucleic acid binding // inferred from electronic annotation /// 3735 // structural constituent of ribosome // inferred from sequence or structural similarity /// 3735 // structural constituent of ribosome // non-traceable author statement /// 5515 // protein binding // inferred from physical interaction /// 3735 // structural constituent of ribosome // inferred from electronic annotation …	6412 // protein biosynthesis // inferred from sequence or structural similarity /// 6412 // protein biosynthesis // non-traceable author statement /// 6414 // translational elongation // non-traceable author statement /// 6414 // translational elongation // inferred from electronic annotation /// 6412 // protein biosynthesis // inferred from sequence similarity	5830 // cytosolic ribosome (sensu Eukaryota) // inferred from sequence or structural similarity /// 5830 // cytosolic ribosome (sensu Eukaryota) // non-traceable author statement /// 5842 // cytosolic large ribosomal subunit (sensu Eukaryota) // non-traceable author statement /// 5622 // intracellular // inferred from electronic annotation /// 5840 // ribosome // inferred from electronic annotati…	IPR001813 // Ribosomal protein 60S // 1.7E-30 /// IPR001813 // Ribosomal protein 60S // 4.1E-29
716	141915_at	0.655703	2.06907	7.91408	5.6e-09	8.66e-08	9.98863	---	---	---	---	---	---	---	---	---
2583	143782_at	0.655209	2.96873	9.32794	1.43e-10	3.07e-09	13.7033	FBgn0015037	CG10842	Cyp4p1	Cytochrome P450-4p1	45524	4497 // monooxygenase activity // inferred from electronic annotation /// 16491 // oxidoreductase activity // inferred from electronic annotation /// 5515 // protein binding // inferred from physical interaction /// 5506 // iron ion binding // inferred from electronic annotation /// 20037 // heme binding // inferred from electronic annotation /// 46872 // metal ion binding // inferred from electr…	6118 // electron transport // inferred from electronic annotation /// 8202 // steroid metabolism // inferred from electronic annotation	5792 // microsome // non-traceable author statement /// 16020 // membrane // non-traceable author statement /// 5783 // endoplasmic reticulum // inferred from electronic annotation /// 5792 // microsome // inferred from electronic annotation /// 16020 // membrane // inferred from electronic annotation	IPR001128 // Cytochrome P450 // 7.7E-79
459	141658_at	0.652459	2.30312	8.80268	5.42e-10	1.04e-08	12.3528	FBgn0032167	CG5853	CG5853	CG5853	34322	166 // nucleotide binding // inferred from electronic annotation /// 5215 // transporter activity // inferred from sequence or structural similarity /// 5253 // anion channel activity // inferred from electronic annotation /// 5524 // ATP binding // inferred from electronic annotation /// 42626 // ATPase activity, coupled to transmembrane movement of substances // inferred from sequence or struct…	6629 // lipid metabolism // inferred from electronic annotation /// 6820 // anion transport // inferred from electronic annotation /// 6869 // lipid transport // inferred from electronic annotation	43190 // ATP-binding cassette (ABC) transporter complex // inferred from sequence or structural similarity /// 43190 // ATP-binding cassette (ABC) transporter complex // inferred from sequence similarity	IPR003439 // ABC transporter // 6.6E-43
3057	144256_at	0.652319	0.998109	7.82331	7.15e-09	1.09e-07	9.74176	FBgn0028841	CG17330	jhamt	juvenile hormone acid methyltransferase	34977	8757 // S-adenosylmethionine-dependent methyltransferase activity // inferred from electronic annotation /// 35049 // juvenile hormone acid methyltransferase activity // inferred from direct assay /// 35049 // juvenile hormone acid methyltransferase activity // non-traceable author statement /// 8168 // methyltransferase activity // inferred from electronic annotation /// 16740 // transferase act…	6718 // juvenile hormone biosynthesis // inferred from direct assay /// 6718 // juvenile hormone biosynthesis // non-traceable author statement	---	---
13974	AFFX-CreX-3_at	0.651583	5.52744	6.26924	5.37e-07	5.62e-06	5.38758	---	---	---	---	---	3677 // DNA binding // inferred from electronic annotation	6310 // DNA recombination // inferred from electronic annotation /// 6313 // DNA transposition // inferred from electronic annotation /// 15074 // DNA integration // inferred from electronic annotation	---	---
9214	150413_at	0.651405	1.0667	6.24131	5.82e-07	6.04e-06	5.30761	FBgn0039041	CG13838	CG13838	CG13838	42719	5515 // protein binding // inferred from physical interaction	---	---	IPR005374 // Protein of unknown function UPF0184 // 1.6E-5
12945	154144_at	0.651368	1.73107	11.4191	1.01e-12	3.37e-11	18.7244	FBgn0030142	CG3004	CG3004	CG3004	31903	3729 // mRNA binding // inferred from electronic annotation /// 3924 // GTPase activity // inferred from sequence or structural similarity /// 5515 // protein binding // inferred from physical interaction /// 3924 // GTPase activity // inferred from sequence similarity	16072 // rRNA metabolism // inferred from electronic annotation	5834 // heterotrimeric G-protein complex // inferred from sequence or structural similarity /// 5834 // heterotrimeric G-protein complex // inferred from sequence similarity	IPR001680 // G-protein beta WD-40 repeat // 0.0018 /// IPR001680 // G-protein beta WD-40 repeat // 0.1 /// IPR001680 // G-protein beta WD-40 repeat // 7.1E-6 /// IPR001680 // G-protein beta WD-40 repeat // 2.5E-4 /// IPR001680 // G-protein beta WD-40 repeat // 0.0042 /// IPR001680 // G-protein beta WD-40 repeat // 1.5E-9 /// IPR001680 // G-protein beta WD-40 repeat // 9.4E-6
2636	143835_at	0.650291	2.62832	4.48673	9.05e-05	0.000549729	0.278281	FBgn0015657	CG10578	DnaJ-1	DnaJ-like-1	38643	51082 // unfolded protein binding // inferred from electronic annotation /// 5515 // protein binding // inferred from physical interaction /// 31072 // heat shock protein binding // inferred from electronic annotation	6457 // protein folding // inferred from electronic annotation /// 6950 // response to stress // inferred from electronic annotation /// 6952 // defense response // inferred from electronic annotation /// 9408 // response to heat // inferred from sequence or structural similarity /// 6986 // response to unfolded protein // inferred from electronic annotation /// 9408 // response to heat // inferr…	5737 // cytoplasm // non-traceable author statement	IPR002939 // Chaperone DnaJ, C-terminal // 2.2E-9 /// IPR001623 // Heat shock protein DnaJ, N-terminal // 9.7E-39 /// IPR002939 // Chaperone DnaJ, C-terminal // 1.7E-6
1216	142415_at	0.649915	3.74448	9.67844	5.99e-11	1.38e-09	14.5845	FBgn0013305	CG3798	Nmda1	N-methyl-D-aspartate receptor-associated protein	36419	1584 // rhodopsin-like receptor activity // inferred from electronic annotation /// 4972 // N-methyl-D-aspartate selective glutamate receptor activity // inferred from sequence or structural similarity /// 4872 // receptor activity // inferred from electronic annotation /// 4972 // N-methyl-D-aspartate selective glutamate receptor activity // inferred from sequence similarity	7186 // G-protein coupled receptor protein signaling pathway // inferred from electronic annotation /// 7601 // visual perception // inferred from electronic annotation	17146 // N-methyl-D-aspartate selective glutamate receptor complex // inferred from sequence or structural similarity /// 17146 // N-methyl-D-aspartate selective glutamate receptor complex // inferred from sequence similarity	IPR006214 // Protein of unknown function UPF0005 // 1.9E-72 /// IPR006214 // Protein of unknown function UPF0005 // 1.9E-72 /// IPR006214 // Protein of unknown function UPF0005 // 1.9E-72
10449	151648_at	0.649884	2.69656	10.1498	1.91e-11	4.9e-10	15.7444	FBgn0025866	CG8107	CalpB	Calpain-B	39165	4198 // calpain activity // inferred from direct assay /// 4198 // calpain activity // non-traceable author statement /// 5509 // calcium ion binding // inferred from electronic annotation /// 5509 // calcium ion binding // non-traceable author statement /// 5516 // calmodulin binding // inferred from electronic annotation /// 5515 // protein binding // inferred from physical interaction /// 4197…	6508 // proteolysis // inferred from direct assay /// 6508 // proteolysis // inferred from electronic annotation /// 16540 // protein autoprocessing // traceable author statement	5622 // intracellular // inferred from electronic annotation /// 5737 // cytoplasm // inferred from direct assay /// 5737 // cytoplasm // non-traceable author statement /// 16020 // membrane // inferred from direct assay /// 16020 // membrane // inferred from electronic annotation	IPR001300 // Peptidase C2, calpain // 1.0E-126 /// IPR002048 // Calcium-binding EF-hand // 1.2E-5 /// IPR002048 // Calcium-binding EF-hand // 0.16 /// IPR001300 // Peptidase C2, calpain // 1.0E-99
72	141271_at	0.648975	2.06152	5.42343	6.1e-06	4.97e-05	2.95429	FBgn0037443	CG1021	CG1021	CG1021	40792	---	---	---	---
3591	144790_at	0.645472	0.576906	10.691	5.32e-12	1.57e-10	17.0403	FBgn0030189	CG2909	CG2909	CG2909	31958	5515 // protein binding // inferred from physical interaction	---	---	---
13008	154207_at	0.644897	2.66698	6.69473	1.61e-07	1.87e-06	6.60028	FBgn0033734	CG8520	CG8520	CG8520	36357	16887 // ATPase activity // inferred from sequence or structural similarity /// 16887 // ATPase activity // inferred from sequence similarity	---	---	IPR005654 // AFG1-like ATPase // 3.7E-89
2970	144169_at	0.644834	2.28572	6.7883	1.24e-07	1.46e-06	6.86524	FBgn0027052	CG5203	CHIP	CHIP	34433	4842 // ubiquitin-protein ligase activity // inferred from direct assay /// 5515 // protein binding // inferred from physical interaction /// 4842 // ubiquitin-protein ligase activity // inferred from electronic annotation /// 5488 // binding // inferred from electronic annotation /// 16874 // ligase activity // inferred from electronic annotation	6457 // protein folding // inferred from electronic annotation /// 16567 // protein ubiquitination // inferred from electronic annotation /// 19538 // protein metabolism // inferred from electronic annotation	151 // ubiquitin ligase complex // inferred from electronic annotation	IPR001440 // TPR repeat // 9.3E-7 /// IPR001440 // TPR repeat // 0.062 /// IPR001440 // TPR repeat // 9.6E-4 /// IPR003613 // Zn-finger, modified RING // 2.2E-55
2235	143434_at	0.643498	5.22265	8.47709	1.26e-09	2.24e-08	11.4979	FBgn0004173	CG17934	Mst84Db	Male-specific RNA 84Db	40888	5506 // iron ion binding // inferred from electronic annotation	6118 // electron transport // inferred from electronic annotation /// 7275 // development // inferred from electronic annotation /// 7283 // spermatogenesis // inferred from electronic annotation /// 30154 // cell differentiation // inferred from electronic annotation	---	IPR005634 // Male specific sperm protein // 7.3E-17
682	141881_at	0.642088	1.21996	5.87692	1.65e-06	1.52e-05	4.26095	---	---	---	---	---	---	---	---	---
1899	143098_at	0.640751	-0.0242446	4.35817	0.00013055	0.000760501	-0.0822954	FBgn0000278	CG1878	CecB	Cecropin B	43598	---	6961 // antibacterial humoral response (sensu Protostomia) // inferred from direct assay /// 6961 // antibacterial humoral response (sensu Protostomia) // inferred from expression pattern /// 6961 // antibacterial humoral response (sensu Protostomia) // inferred from sequence or structural similarity /// 6961 // antibacterial humoral response (sensu Protostomia) // non-traceable author statement …	5576 // extracellular region // inferred from direct assay	IPR000875 // Cecropin // 3.8E-18
237	141436_at	0.638441	1.59688	7.26912	3.24e-08	4.35e-07	8.21486	FBgn0038250	CG3505	CG3505	CG3505	41777	4252 // serine-type endopeptidase activity // non-traceable author statement /// 4263 // chymotrypsin activity // inferred from electronic annotation /// 4295 // trypsin activity // inferred from electronic annotation /// 4252 // serine-type endopeptidase activity // inferred from electronic annotation	6508 // proteolysis // inferred from electronic annotation	---	IPR001254 // Peptidase S1, chymotrypsin // 1.5E-51
5683	146882_at	0.637677	2.25769	3.544	0.0012562	0.00521307	-2.28979	FBgn0029092	CG11804	ced-6	ced-6	35971	5102 // receptor binding // inferred from electronic annotation /// 5515 // protein binding // inferred from physical interaction	165 // MAPKKK cascade // inferred from electronic annotation /// 6915 // apoptosis // inferred from electronic annotation /// 6952 // defense response // inferred from electronic annotation /// 7165 // signal transduction // inferred from electronic annotation /// 7166 // cell surface receptor linked signal transduction // inferred from electronic annotation /// 7169 // transmembrane receptor pro…	---	IPR006020 // Phosphotyrosine interaction domain // 6.6E-26
9321	150520_at	0.63726	2.31934	8.39769	1.55e-09	2.71e-08	11.2874	FBgn0039218	CG13628	Rpb10	Rpb10	42942	3676 // nucleic acid binding // inferred from electronic annotation /// 3899 // DNA-directed RNA polymerase activity // inferred from sequence or structural similarity /// 5515 // protein binding // inferred from physical interaction /// 3677 // DNA binding // inferred from electronic annotation /// 3899 // DNA-directed RNA polymerase activity // inferred from electronic annotation /// 8270 // zi…	6350 // transcription // inferred from sequence or structural similarity /// 6366 // transcription from RNA polymerase II promoter // inferred from sequence or structural similarity /// 6350 // transcription // inferred from electronic annotation /// 45449 // regulation of transcription // inferred from electronic annotation /// 6350 // transcription // inferred from sequence similarity /// 6366 …	5634 // nucleus // inferred from sequence or structural similarity /// 5665 // DNA-directed RNA polymerase II, core complex // inferred from sequence or structural similarity /// 5634 // nucleus // inferred from electronic annotation /// 5634 // nucleus // inferred from sequence similarity /// 5665 // DNA-directed RNA polymerase II, core complex // inferred from sequence similarity	IPR000268 // RNA polymerases N/8 Kd subunits // 4.9E-36
5961	147160_at	0.636943	2.96431	4.98966	2.14e-05	0.000153281	1.70755	FBgn0033857	CG13335	CG13335	CG13335	36511	---	---	---	---
2811	144010_at	0.635825	2.89221	7.80713	7.47e-09	1.13e-07	9.69767	FBgn0024196	CG10751	robl	roadblock	36963	5200 // structural constituent of cytoskeleton // inferred from electronic annotation /// 42623 // ATPase activity, coupled // inferred from sequence or structural similarity /// 5515 // protein binding // inferred from physical interaction /// 42623 // ATPase activity, coupled // inferred from sequence similarity	6928 // cell motility // inferred from electronic annotation /// 7018 // microtubule-based movement // inferred from sequence or structural similarity /// 16319 // mushroom body development // inferred from mutant phenotype /// 16358 // dendrite development // traceable author statement /// 7018 // microtubule-based movement // inferred from sequence similarity	5858 // axonemal dynein complex // non-traceable author statement /// 5875 // microtubule associated complex // inferred from sequence or structural similarity /// 30286 // dynein complex // inferred from sequence or structural similarity /// 5875 // microtubule associated complex // inferred from sequence similarity /// 30286 // dynein complex // inferred from sequence similarity	IPR004942 // Roadblock/LC7 family // 2.2E-34
11364	152563_at	0.634555	3.04592	8.07554	3.64e-09	5.88e-08	10.4254	FBgn0038803	CG5191	CG5191	CG5191	42431	4040 // amidase activity // inferred from electronic annotation /// 16787 // hydrolase activity // inferred from electronic annotation /// 17068 // glutamyl-tRNA(Gln) amidotransferase activity // inferred from sequence or structural similarity /// 17068 // glutamyl-tRNA(Gln) amidotransferase activity // inferred from sequence similarity	6418 // tRNA aminoacylation for protein translation // inferred from electronic annotation /// 6807 // nitrogen compound metabolism // inferred from electronic annotation	---	IPR000120 // Amidase // 3.0E-40 /// IPR000120 // Amidase // 2.2E-50 /// IPR000120 // Amidase // 2.2E-50
10941	152140_at	0.628271	1.1118	6.6375	1.89e-07	2.16e-06	6.43786	FBgn0032935	CG8678	CG8678	CG8678	35396	---	---	5635 // nuclear envelope // inferred from electronic annotation	---
9972	151171_at	0.627488	1.85013	6.14966	7.56e-07	7.65e-06	5.04484	FBgn0040694	CG14974	CG14974	CG14974	50167	---	---	---	---
9144	150343_at	0.627264	3.67101	5.17601	1.25e-05	9.47e-05	2.24222	FBgn0038930	CG5778	CG5778	CG5778	42598	---	---	---	---
13828	155027_at	0.624235	3.33813	8.95631	3.66e-10	7.25e-09	12.7515	FBgn0003277	CG1554	RpII215	RNA polymerase II 215kD subunit	32100	3676 // nucleic acid binding // inferred from electronic annotation /// 3677 // DNA binding // inferred from electronic annotation /// 3899 // DNA-directed RNA polymerase activity // inferred from sequence or structural similarity /// 3899 // DNA-directed RNA polymerase activity // non-traceable author statement /// 3899 // DNA-directed RNA polymerase activity // inferred from electronic annotati…	6366 // transcription from RNA polymerase II promoter // inferred from sequence or structural similarity /// 6366 // transcription from RNA polymerase II promoter // non-traceable author statement /// 9299 // mRNA transcription // inferred from electronic annotation /// 6350 // transcription // inferred from electronic annotation /// 6366 // transcription from RNA polymerase II promoter // inferr…	5665 // DNA-directed RNA polymerase II, core complex // inferred from sequence or structural similarity /// 5665 // DNA-directed RNA polymerase II, core complex // non-traceable author statement /// 5634 // nucleus // inferred from electronic annotation /// 5665 // DNA-directed RNA polymerase II, core complex // inferred from electronic annotation /// 5665 // DNA-directed RNA polymerase II, core …	IPR000722 // RNA polymerase, alpha subunit // 8.5E-110 /// IPR000684 // Eukaryotic RNA polymerase II heptapeptide repeat // 1.2 /// IPR000684 // Eukaryotic RNA polymerase II heptapeptide repeat // 0.15 /// IPR000684 // Eukaryotic RNA polymerase II heptapeptide repeat // 0.013 /// IPR000684 // Eukaryotic RNA polymerase II heptapeptide repeat // 1.6 /// IPR000684 // Eukaryotic RNA polymerase II hep…
1851	143050_at	0.623861	0.405542	4.18157	0.000215241	0.00115848	-0.573303	FBgn0035001	CG4527	slik	Sterile20-like kinase	37893	4702 // receptor signaling protein serine/threonine kinase activity // inferred from sequence or structural similarity /// 4702 // receptor signaling protein serine/threonine kinase activity // non-traceable author statement /// 5524 // ATP binding // inferred from electronic annotation /// 42801 // polo kinase kinase activity // non-traceable author statement /// 166 // nucleotide binding // inf…	165 // MAPKKK cascade // inferred from electronic annotation /// 910 // cytokinesis // inferred from mutant phenotype /// 6468 // protein amino acid phosphorylation // non-traceable author statement /// 6917 // induction of apoptosis // inferred from electronic annotation /// 8283 // cell proliferation // inferred from mutant phenotype /// 6468 // protein amino acid phosphorylation // inferred fr…	---	IPR000719 // Protein kinase // 1.3E-82
2242	143441_at	0.623517	2.75764	6.8899	9.3e-08	1.13e-06	7.15213	FBgn0004228	CG7936	mex1	midgut expression 1	39677	5515 // protein binding // inferred from physical interaction	7494 // midgut development // non-traceable author statement /// 9790 // embryonic development // non-traceable author statement /// 7275 // development // inferred from electronic annotation	---	---
8771	149970_at	0.622879	2.2525	6.13148	7.96e-07	8e-06	4.99269	FBgn0038356	CG12784	CG12784	CG12784	41903	---	---	---	---
586	141785_at	0.622142	2.1275	9.61409	7.02e-11	1.59e-09	14.424	FBgn0034243	CG6501	Ngp	Ngp	36989	5102 // receptor binding // inferred from electronic annotation /// 5525 // GTP binding // non-traceable author statement /// 5525 // GTP binding // inferred from electronic annotation	6886 // intracellular protein transport // inferred from electronic annotation /// 7166 // cell surface receptor linked signal transduction // inferred from electronic annotation /// 7242 // intracellular signaling cascade // inferred from electronic annotation	5634 // nucleus // non-traceable author statement /// 5622 // intracellular // inferred from electronic annotation	IPR002917 // GTP-binding protein, HSR1-related // 4.8E-102
5422	146621_at	0.621039	6.30256	7.99808	4.47e-09	7.09e-08	10.2162	FBgn0032987	CG12775	RpL21	Ribosomal protein L21	35453	3676 // nucleic acid binding // inferred from electronic annotation /// 3735 // structural constituent of ribosome // inferred from electronic annotation	6412 // protein biosynthesis // inferred from sequence or structural similarity /// 6412 // protein biosynthesis // inferred from electronic annotation /// 6412 // protein biosynthesis // inferred from sequence similarity	5842 // cytosolic large ribosomal subunit (sensu Eukaryota) // inferred from sequence or structural similarity /// 5622 // intracellular // inferred from electronic annotation /// 5840 // ribosome // inferred from electronic annotation /// 5842 // cytosolic large ribosomal subunit (sensu Eukaryota) // inferred from sequence similarity	IPR001147 // Ribosomal protein L21e // 1.3E-62
11411	152610_at	0.620213	2.46604	7.86572	6.38e-09	9.77e-08	9.85722	FBgn0040074 /// FBgn0053060 /// FBgn0053061	CG13057	retinin /// CG33060 /// CG33061	retinin /// CG33060 /// CG33061	318838 /// 39807 /// 53564	---	---	---	IPR007614 // Retinin-like protein // 1.7E-33
12252	153451_at	0.619822	2.48989	10.7131	5.06e-12	1.5e-10	17.0924	FBgn0013762	CG8203	Cdk5	Cyclin-dependent kinase 5	36727	4674 // protein serine/threonine kinase activity // non-traceable author statement /// 4693 // cyclin-dependent protein kinase activity // inferred from sequence or structural similarity /// 4702 // receptor signaling protein serine/threonine kinase activity // inferred from electronic annotation /// 5524 // ATP binding // inferred from electronic annotation /// 30332 // cyclin binding // non-tra…	74 // regulation of progression through cell cycle // inferred from electronic annotation /// 6468 // protein amino acid phosphorylation // inferred from sequence or structural similarity /// 6468 // protein amino acid phosphorylation // non-traceable author statement /// 7049 // cell cycle // inferred from mutant phenotype /// 7067 // mitosis // inferred from electronic annotation /// 7269 // ne…	---	IPR000719 // Protein kinase // 2.4E-97
462	141661_at	0.618219	1.20476	9.20932	1.93e-10	4.03e-09	13.4014	FBgn0010278	CG4817	Ssrp	Structure specific recognition protein	37767	217 // DNA secondary structure binding // inferred from sequence or structural similarity /// 3697 // single-stranded DNA binding // inferred from sequence or structural similarity /// 3697 // single-stranded DNA binding // non-traceable author statement /// 3727 // single-stranded RNA binding // non-traceable author statement /// 5515 // protein binding // inferred from physical interaction /// …	1672 // regulation of chromatin assembly or disassembly // inferred from mutant phenotype /// 6357 // regulation of transcription from RNA polymerase II promoter // inferred from electronic annotation /// 6355 // regulation of transcription, DNA-dependent // inferred from electronic annotation	5634 // nucleus // inferred from sequence or structural similarity /// 5634 // nucleus // non-traceable author statement /// 5730 // nucleolus // non-traceable author statement /// 35101 // FACT complex // traceable author statement /// 5634 // nucleus // inferred from electronic annotation /// 5634 // nucleus // inferred from sequence similarity	IPR000969 // Structure-specific recognition protein // 1.0E-126 /// IPR000910 // HMG1/2 (high mobility group) box // 3.1E-33
12406	153605_at	0.617298	2.00759	8.84301	4.89e-10	9.44e-09	12.4577	FBgn0039869	CG1890	CG1890	CG1890	43737	51082 // unfolded protein binding // inferred from electronic annotation /// 5515 // protein binding // inferred from physical interaction	7021 // tubulin folding // inferred from sequence or structural similarity /// 7022 // chaperonin-mediated tubulin folding // inferred from electronic annotation /// 7021 // tubulin folding // inferred from sequence similarity	---	IPR004226 // Tubulin binding cofactor A // 4.6E-52
453	141652_at	0.615104	1.16612	5.60157	3.65e-06	3.15e-05	3.46765	FBgn0036772	CG5290	CG5290	CG5290	39998	---	---	---	---
6752	147951_at	0.614111	2.06916	3.74479	0.000726816	0.00328898	-1.76044	FBgn0035176	CG13905	CG13905	CG13905	38107	---	---	---	---
11460	152659_at	0.611585	2.10754	6.27244	5.32e-07	5.58e-06	5.39674	FBgn0039402	CG14542	CG14542	CG14542	43164	5515 // protein binding // inferred from physical interaction	---	---	IPR005024 // Snf7 // 8.0E-63
8493	149692_at	0.610998	2.96315	8.15491	2.94e-09	4.85e-08	10.6389	FBgn0025701	CG14709	CG14709	CG14709	41387	166 // nucleotide binding // inferred from electronic annotation /// 5524 // ATP binding // inferred from electronic annotation /// 8514 // organic anion transporter activity // inferred from sequence or structural similarity /// 42626 // ATPase activity, coupled to transmembrane movement of substances // inferred from sequence or structural similarity /// 8514 // organic anion transporter activi…	6855 // multidrug transport // inferred from sequence or structural similarity /// 6858 // extracellular transport // inferred from electronic annotation /// 6952 // defense response // inferred from electronic annotation /// 9636 // response to toxin // inferred from electronic annotation /// 6855 // multidrug transport // inferred from sequence similarity	16021 // integral to membrane // inferred from electronic annotation /// 43190 // ATP-binding cassette (ABC) transporter complex // inferred from sequence or structural similarity /// 43190 // ATP-binding cassette (ABC) transporter complex // inferred from sequence similarity	IPR001140 // ABC transporter, transmembrane region // 2.1E-22 /// IPR001140 // ABC transporter, transmembrane region // 1.1E-31 /// IPR003439 // ABC transporter // 1.1E-47 /// IPR003439 // ABC transporter // 8.3E-49
13188	154387_at	0.610664	3.06677	13.4791	1.3e-14	6.13e-13	23.1416	FBgn0027086	CG11471	Aats-ile	Isoleucyl-tRNA synthetase	45785	3729 // mRNA binding // inferred from electronic annotation /// 4822 // isoleucine-tRNA ligase activity // inferred from sequence or structural similarity /// 5524 // ATP binding // inferred from electronic annotation /// 4812 // aminoacyl-tRNA ligase activity // inferred from electronic annotation /// 4822 // isoleucine-tRNA ligase activity // inferred from electronic annotation /// 4822 // isol…	6428 // isoleucyl-tRNA aminoacylation // inferred from sequence or structural similarity /// 6418 // tRNA aminoacylation for protein translation // inferred from electronic annotation /// 6428 // isoleucyl-tRNA aminoacylation // inferred from electronic annotation /// 6428 // isoleucyl-tRNA aminoacylation // inferred from sequence similarity	---	IPR002300 // Aminoacyl-tRNA synthetase, class Ia // 1.0E-126
12100	153299_at	0.610405	1.84674	8.93712	3.84e-10	7.58e-09	12.7018	FBgn0032451	CG12292	CG12292	CG12292	34681	5515 // protein binding // inferred from physical interaction	---	---	IPR008521 // Protein of unknown function DUF803 // 1.0E-126
934	142133_at	0.60912	1.62305	8.68351	7.37e-10	1.38e-08	12.0414	FBgn0024891	CG2098	ferrochelatase	ferrochelatase	43757	4325 // ferrochelatase activity // inferred from direct assay /// 4325 // ferrochelatase activity // inferred from sequence or structural similarity /// 4325 // ferrochelatase activity // non-traceable author statement /// 4325 // ferrochelatase activity // inferred from electronic annotation /// 5506 // iron ion binding // inferred from electronic annotation /// 16829 // lyase activity // inferr…	6782 // protoporphyrinogen IX biosynthesis // inferred from sequence or structural similarity /// 6782 // protoporphyrinogen IX biosynthesis // non-traceable author statement /// 6779 // porphyrin biosynthesis // inferred from electronic annotation /// 6783 // heme biosynthesis // inferred from electronic annotation /// 6782 // protoporphyrinogen IX biosynthesis // inferred from sequence similari…	5743 // mitochondrial inner membrane // inferred from sequence or structural similarity /// 5743 // mitochondrial inner membrane // non-traceable author statement /// 5739 // mitochondrion // inferred from electronic annotation /// 5743 // mitochondrial inner membrane // inferred from sequence similarity	IPR001015 // Ferrochelatase // 1.0E-126 /// IPR001015 // Ferrochelatase // 2.5E-97 /// IPR001015 // Ferrochelatase // 1.0E-126
10896	152095_at	0.608453	0.853354	9.84292	4.01e-11	9.63e-10	14.9925	FBgn0030246	CG1582	CG1582	CG1582	32021	3676 // nucleic acid binding // inferred from electronic annotation /// 3678 // DNA helicase activity // inferred from electronic annotation /// 3724 // RNA helicase activity // inferred from electronic annotation /// 4386 // helicase activity // inferred from sequence or structural similarity /// 5524 // ATP binding // inferred from electronic annotation /// 8026 // ATP-dependent helicase activi…	---	---	IPR007502 // Helicase-associated region // 5.3E-43 /// IPR001650 // Helicase, C-terminal // 2.2E-14 /// IPR000571 // Zn-finger, C-x8-C-x5-C-x3-H type // 9.8E-9
2536	143735_at	0.608037	3.405	9.53906	8.45e-11	1.88e-09	14.236	FBgn0013987	CG3086	MAPk-Ak2	MAP kinase activated protein-kinase-2	44573	4672 // protein kinase activity // inferred from sequence or structural similarity /// 4674 // protein serine/threonine kinase activity // inferred from sequence or structural similarity /// 4674 // protein serine/threonine kinase activity // non-traceable author statement /// 4702 // receptor signaling protein serine/threonine kinase activity // inferred from electronic annotation /// 5524 // AT…	165 // MAPKKK cascade // inferred from electronic annotation /// 6468 // protein amino acid phosphorylation // inferred from sequence or structural similarity /// 6468 // protein amino acid phosphorylation // non-traceable author statement /// 6950 // response to stress // inferred from electronic annotation /// 6952 // defense response // inferred from electronic annotation /// 7155 // cell adhe…	---	IPR000719 // Protein kinase // 3.5E-83
12714	153913_at	0.606495	2.84411	9.09231	2.59e-10	5.25e-09	13.1019	FBgn0029996	CG2257	Ubc-E2H	Ubc-E2H	31728	4840 // ubiquitin conjugating enzyme activity // inferred from sequence or structural similarity /// 16874 // ligase activity // inferred from electronic annotation /// 5515 // protein binding // inferred from physical interaction /// 4842 // ubiquitin-protein ligase activity // inferred from electronic annotation /// 4840 // ubiquitin conjugating enzyme activity // inferred from sequence similar…	6464 // protein modification // inferred from electronic annotation /// 6512 // ubiquitin cycle // inferred from electronic annotation /// 19538 // protein metabolism // inferred from electronic annotation	---	IPR000608 // Ubiquitin-conjugating enzymes // 1.1E-51
10697	151896_at	0.606477	3.20455	9.80937	4.35e-11	1.03e-09	14.9096	FBgn0035528	CG15012	CG15012	CG15012	38529	4563 // beta-N-acetylhexosaminidase activity // inferred from sequence or structural similarity /// 4563 // beta-N-acetylhexosaminidase activity // inferred from sequence similarity	---	---	IPR007919 // Protein of unknown function UPF0220 // 1.0E-22
8570	149769_at	0.605528	1.79992	8.26134	2.22e-09	3.79e-08	10.924	FBgn0038035	CG17227	CG17227	CG17227	41518	3676 // nucleic acid binding // inferred from electronic annotation /// 3910 // DNA ligase (ATP) activity // inferred from sequence or structural similarity /// 5524 // ATP binding // inferred from electronic annotation /// 3677 // DNA binding // inferred from electronic annotation /// 3910 // DNA ligase (ATP) activity // inferred from electronic annotation /// 3910 // DNA ligase (ATP) activity /…	6260 // DNA replication // inferred from electronic annotation /// 6281 // DNA repair // inferred from electronic annotation /// 6310 // DNA recombination // inferred from electronic annotation	5622 // intracellular // inferred from electronic annotation	IPR000977 // ATP-dependent DNA ligase // 3.0E-23 /// IPR000977 // ATP-dependent DNA ligase // 1.7E-92 /// IPR000977 // ATP-dependent DNA ligase // 2.0E-4
154	141353_at	0.605382	2.00383	4.6055	6.45e-05	0.000409537	0.613422	FBgn0038299	CG6687	CG6687	CG6687	41829	4867 // serine-type endopeptidase inhibitor activity // inferred from sequence or structural similarity /// 46933 // hydrogen-transporting ATP synthase activity, rotational mechanism // inferred from electronic annotation /// 46961 // hydrogen-transporting ATPase activity, rotational mechanism // inferred from electronic annotation /// 5515 // protein binding // inferred from physical interaction…	6508 // proteolysis // inferred from electronic annotation /// 15986 // ATP synthesis coupled proton transport // inferred from electronic annotation	16020 // membrane // inferred from electronic annotation /// 16469 // proton-transporting two-sector ATPase complex // inferred from electronic annotation	IPR000215 // Serpin // 4.7E-69
4347	145546_i_at	0.605106	4.0455	3.3754	0.00197409	0.00755241	-2.72455	FBgn0031277	CG13947	CG13947	CG13947	33250	---	---	---	---
1141	142340_at	0.604969	1.79809	6.2727	5.32e-07	5.58e-06	5.39748	FBgn0016013	CG14993	Faa	Fumarylacetoacetase	45577	4334 // fumarylacetoacetase activity // inferred from sequence or structural similarity /// 3824 // catalytic activity // inferred from electronic annotation /// 4334 // fumarylacetoacetase activity // inferred from electronic annotation /// 4334 // fumarylacetoacetase activity // inferred from sequence similarity	9063 // amino acid catabolism // inferred from electronic annotation /// 9072 // aromatic amino acid family metabolism // inferred from electronic annotation /// 8152 // metabolism // inferred from electronic annotation	---	IPR002529 // Fumarylacetoacetate (FAA) hydrolase // 9.0E-91
12361	153560_at	0.60494	5.7645	8.25346	2.27e-09	3.87e-08	10.903	FBgn0052672	CG32672	Atg8a	Autophagy-specific gene 8a	32001	5200 // structural constituent of cytoskeleton // inferred from electronic annotation /// 8017 // microtubule binding // inferred from electronic annotation /// 5515 // protein binding // inferred from physical interaction	7010 // cytoskeleton organization and biogenesis // inferred from electronic annotation	---	IPR004241 // Light chain 3 (LC3) // 5.1E-81
467	141666_at	0.601977	2.47229	6.54024	2.49e-07	2.78e-06	6.16133	FBgn0046214	CG11844	CG11844	CG11844	43016	---	---	---	IPR006861 // Hyaluronan/mRNA binding protein // 6.0E-73 /// IPR006861 // Hyaluronan/mRNA binding protein // 6.0E-73
4077	145276_at	0.601575	1.9771	10.6254	6.2e-12	1.8e-10	16.8853	FBgn0030894	CG7192	CG7192	CG7192	32791	---	---	---	---
3826	145025_at	0.599792	1.224	9.70499	5.61e-11	1.3e-09	14.6506	FBgn0030510	CG12177	CG12177	CG12177	32326	16787 // hydrolase activity // inferred from electronic annotation	6139 // nucleobase, nucleoside, nucleotide and nucleic acid metabolism // inferred from electronic annotation /// 6144 // purine base metabolism // inferred from electronic annotation /// 6206 // pyrimidine base metabolism // inferred from electronic annotation	---	IPR001910 // Inosine/uridine-preferring nucleoside hydrolase // 1.4E-42
10024	151223_at	0.596275	4.3078	5.23814	1.04e-05	8.02e-05	2.42084	FBgn0040747	CG12853	CG12853	CG12853	50220	---	---	---	---
760	141959_at	0.59523	2.07493	5.55826	4.14e-06	3.5e-05	3.34284	---	---	---	---	---	---	---	---	---
11241	152440_at	0.591888	3.4208	9.66365	6.21e-11	1.42e-09	14.5477	FBgn0002031	CG10691	l(2)37Cc	lethal (2) 37Cc	49168	---	74 // regulation of progression through cell cycle // inferred from electronic annotation /// 2165 // larval or pupal development (sensu Insecta) // non-traceable author statement /// 6260 // DNA replication // inferred from electronic annotation /// 7275 // development // inferred from electronic annotation	5739 // mitochondrion // inferred from direct assay /// 5739 // mitochondrion // inferred from sequence or structural similarity /// 5740 // mitochondrial envelope // non-traceable author statement /// 5739 // mitochondrion // inferred from sequence similarity	IPR001107 // Band 7 protein // 5.0E-60
12195	153394_at	0.591268	1.80289	8.03823	4.02e-09	6.43e-08	10.3247	FBgn0036783	CG7313	CheA75a	CheA75a	40011	---	---	---	---
57	141256_at	0.591016	1.02833	8.87199	4.54e-10	8.84e-09	12.533	FBgn0004698	CG8153	mus210	mutagen-sensitive 210	36697	3684 // damaged DNA binding // inferred from sequence or structural similarity /// 3677 // DNA binding // inferred from electronic annotation /// 3684 // damaged DNA binding // inferred from electronic annotation /// 3684 // damaged DNA binding // inferred from sequence similarity	6289 // nucleotide-excision repair // inferred from sequence or structural similarity /// 6281 // DNA repair // inferred from electronic annotation /// 6289 // nucleotide-excision repair // inferred from electronic annotation /// 6974 // response to DNA damage stimulus // inferred from electronic annotation /// 6289 // nucleotide-excision repair // inferred from sequence similarity	5634 // nucleus // non-traceable author statement /// 5634 // nucleus // inferred from electronic annotation	IPR004583 // DNA repair protein Rad4 // 1.0E-126 /// IPR004583 // DNA repair protein Rad4 // 1.0E-126 /// IPR004583 // DNA repair protein Rad4 // 1.0E-126
4801	146000_at	0.590225	0.985769	6.27446	5.29e-07	5.56e-06	5.40252	FBgn0031973	CG7219	CG7219	CG7219	34091	4867 // serine-type endopeptidase inhibitor activity // inferred from sequence or structural similarity /// 4867 // serine-type endopeptidase inhibitor activity // inferred from sequence similarity	---	---	IPR000215 // Serpin // 4.2E-8 /// IPR000215 // Serpin // 6.5E-49 /// IPR000215 // Serpin // 2.9E-14
4502	145701_at	0.589459	1.55716	8.2379	2.36e-09	4.01e-08	10.8614	FBgn0053282	CG33282	CG33282	CG33282	2768939	15145 // monosaccharide transporter activity // inferred from sequence or structural similarity /// 15145 // monosaccharide transporter activity // inferred from sequence similarity	6810 // transport // inferred from electronic annotation /// 15749 // monosaccharide transport // inferred from sequence or structural similarity /// 15749 // monosaccharide transport // inferred from sequence similarity	16020 // membrane // inferred from electronic annotation /// 16020 // membrane // inferred from sequence or structural similarity /// 16021 // integral to membrane // inferred from electronic annotation /// 16020 // membrane // inferred from sequence similarity	IPR005828 // General substrate transporter // 7.9E-20
3058	144257_at	0.587989	0.441585	9.51211	9.03e-11	2e-09	14.1684	FBgn0041627	CG18801	Ku80	Ku80	34930	3676 // nucleic acid binding // inferred from electronic annotation /// 3677 // DNA binding // inferred from electronic annotation /// 4003 // ATP-dependent DNA helicase activity // inferred from sequence or structural similarity /// 17116 // single-stranded DNA-dependent ATP-dependent DNA helicase activity // inferred from sequence or structural similarity /// 4003 // ATP-dependent DNA helicase …	723 // telomere maintenance // inferred from mutant phenotype /// 6281 // DNA repair // inferred from electronic annotation /// 6303 // double-strand break repair via nonhomologous end joining // inferred from electronic annotation /// 6310 // DNA recombination // inferred from electronic annotation	5958 // DNA-dependent protein kinase complex // inferred from electronic annotation /// 17117 // single-stranded DNA-dependent ATP-dependent DNA helicase complex // inferred from sequence or structural similarity /// 5634 // nucleus // inferred from electronic annotation /// 17117 // single-stranded DNA-dependent ATP-dependent DNA helicase complex // inferred from sequence similarity	IPR006164 // Ku // 1.5E-64 /// IPR005161 // Ku70/Ku80 N-terminal alpha/beta domain // 8.1E-65
11811	153010_at	0.587815	2.37641	10.3558	1.17e-11	3.18e-10	16.2421	FBgn0036805 /// FBgn0068178	CG4108	Chmp1 /// DyakChmp1	Chmp1 /// Chmp1	40036	---	---	---	IPR005024 // Snf7 // 8.0E-62
6249	147448_at	0.587701	1.50692	8.42625	1.44e-09	2.53e-08	11.3632	FBgn0034362	CG5323	CG5323	CG5323	37137	5515 // protein binding // inferred from physical interaction	---	---	IPR008560 // Eukaryotic protein of unknown function DUF842 // 3.9E-94
8473	149672_at	0.586714	2.15494	9.29545	1.55e-10	3.29e-09	13.6208	FBgn0037872	CG31299	nocturnin	nocturnin	41339	3676 // nucleic acid binding // inferred from electronic annotation	---	---	IPR005135 // Endonuclease/exonuclease/phosphatase // 1.0E-34 /// IPR005135 // Endonuclease/exonuclease/phosphatase // 1.0E-34 /// IPR005135 // Endonuclease/exonuclease/phosphatase // 1.0E-39
12282	153481_at	0.584563	2.79226	6.05859	9.81e-07	9.68e-06	4.7834	FBgn0030672	CG9281	CG9281	CG9281	32508	166 // nucleotide binding // inferred from electronic annotation /// 5215 // transporter activity // inferred from sequence or structural similarity /// 5524 // ATP binding // inferred from electronic annotation /// 42626 // ATPase activity, coupled to transmembrane movement of substances // inferred from sequence or structural similarity /// 5515 // protein binding // inferred from physical inte…	6810 // transport // inferred from electronic annotation	43190 // ATP-binding cassette (ABC) transporter complex // inferred from sequence or structural similarity /// 16020 // membrane // inferred from electronic annotation /// 43190 // ATP-binding cassette (ABC) transporter complex // inferred from sequence similarity	IPR003439 // ABC transporter // 1.4E-29 /// IPR003439 // ABC transporter // 1.6E-37
12372	153571_at	0.583609	1.38715	9.30514	1.51e-10	3.22e-09	13.6454	FBgn0026751	CG4208	XRCC1	XRCC1	31451	3676 // nucleic acid binding // inferred from electronic annotation /// 3684 // damaged DNA binding // inferred from electronic annotation /// 5515 // protein binding // inferred from physical interaction	12 // single strand break repair // inferred from electronic annotation /// 6289 // nucleotide-excision repair // inferred from sequence or structural similarity /// 6289 // nucleotide-excision repair // non-traceable author statement /// 6289 // nucleotide-excision repair // inferred from sequence similarity	5622 // intracellular // inferred from electronic annotation /// 5634 // nucleus // inferred from electronic annotation	IPR001357 // BRCT // 5.7E-13 /// IPR002706 // DNA-repair protein Xrcc1, N-terminal // 4.1E-49
3899	145098_at	0.583517	2.51915	2.21916	0.0338175	0.0758096	-5.37389	FBgn0030608	CG9057	Lsd-2	Lipid storage droplet-2	32437	5515 // protein binding // inferred from physical interaction /// 5319 // lipid transporter activity // inferred from expression pattern	19915 // sequestering of lipid // inferred from mutant phenotype /// 19915 // sequestering of lipid // non-traceable author statement /// 30730 // sequestering of triacylglycerol // inferred from mutant phenotype /// 31887 // lipid particle transport along microtubule // inferred from mutant phenotype /// 6869 // lipid transport // inferred from expression pattern /// 19915 // sequestering of lip…	5811 // lipid particle // inferred from direct assay /// 5811 // lipid particle // non-traceable author statement	IPR004279 // Perilipin // 1.0E-126
12739	153938_at	0.580846	2.47274	5.41926	6.18e-06	5.02e-05	2.94226	FBgn0010715	CG10967	Atg1	Autophagy-specific gene 1	39454	4672 // protein kinase activity // non-traceable author statement /// 4674 // protein serine/threonine kinase activity // inferred from sequence or structural similarity /// 4702 // receptor signaling protein serine/threonine kinase activity // inferred from electronic annotation /// 4713 // protein-tyrosine kinase activity // inferred from electronic annotation /// 5524 // ATP binding // inferre…	6468 // protein amino acid phosphorylation // non-traceable author statement /// 6914 // autophagy // inferred from mutant phenotype /// 7242 // intracellular signaling cascade // inferred from electronic annotation /// 6468 // protein amino acid phosphorylation // inferred from electronic annotation	---	IPR000719 // Protein kinase // 1.5E-80
13269	154468_at	0.579949	1.52279	6.25017	5.67e-07	5.91e-06	5.33296	FBgn0037551	CG7891	CG7891	CG7891	40961	5525 // GTP binding // inferred from sequence or structural similarity /// 5525 // GTP binding // inferred from electronic annotation /// 5525 // GTP binding // inferred from sequence similarity	6886 // intracellular protein transport // inferred from electronic annotation /// 7186 // G-protein coupled receptor protein signaling pathway // inferred from electronic annotation /// 7264 // small GTPase mediated signal transduction // inferred from electronic annotation /// 17157 // regulation of exocytosis // inferred from electronic annotation /// 6364 // rRNA processing // inferred from e…	5622 // intracellular // inferred from electronic annotation	IPR006689 // ARF/SAR superfamily // 1.8E-40
5362	146561_at	0.579578	2.13922	8.45303	1.34e-09	2.37e-08	11.4342	FBgn0032900	CG14401	CG14401	CG14401	35358	---	---	---	---
12539	153738_at	0.579327	3.42772	9.14691	2.25e-10	4.65e-09	13.2419	FBgn0024947	CG3059	NTPase	NTPase	33495	4382 // guanosine-diphosphatase activity // inferred from sequence or structural similarity /// 17110 // nucleoside-diphosphatase activity // inferred from sequence or structural similarity /// 17111 // nucleoside-triphosphatase activity // inferred from sequence or structural similarity /// 19204 // nucleotide phosphatase activity // inferred from electronic annotation /// 16787 // hydrolase act…	6139 // nucleobase, nucleoside, nucleotide and nucleic acid metabolism // inferred from electronic annotation	---	IPR000407 // Nucleoside phosphatase GDA1/CD39 // 5.7E-63 /// IPR000407 // Nucleoside phosphatase GDA1/CD39 // 6.6E-10 /// IPR000407 // Nucleoside phosphatase GDA1/CD39 // 5.7E-63 /// IPR000407 // Nucleoside phosphatase GDA1/CD39 // 6.6E-10 /// IPR000407 // Nucleoside phosphatase GDA1/CD39 // 3.0E-23 /// IPR000407 // Nucleoside phosphatase GDA1/CD39 // 6.6E-10
12620	153819_at	0.578975	2.50916	9.69253	5.79e-11	1.34e-09	14.6196	FBgn0037137	CG7421	Nopp140	Nopp140	40433	---	17126 // nucleologenesis // inferred from sequence or structural similarity /// 17126 // nucleologenesis // inferred from sequence similarity	5730 // nucleolus // inferred from sequence or structural similarity /// 5730 // nucleolus // traceable author statement /// 5730 // nucleolus // inferred from sequence similarity	IPR007718 // SRP40, C-terminal // 5.3E-46
12950	154149_at	0.57879	2.12942	5.57117	3.99e-06	3.39e-05	3.38003	FBgn0032388	CG6686	CG6686	CG6686	34608	30528 // transcription regulator activity // inferred from electronic annotation /// 5515 // protein binding // inferred from physical interaction	6139 // nucleobase, nucleoside, nucleotide and nucleic acid metabolism // inferred from electronic annotation /// 6366 // transcription from RNA polymerase II promoter // inferred from electronic annotation	---	IPR005011 // SART-1 protein // 1.0E-126 /// IPR005011 // SART-1 protein // 1.0E-126 /// IPR005011 // SART-1 protein // 1.0E-126
2644	143843_at	0.578118	3.24613	6.54505	2.45e-07	2.74e-06	6.17503	FBgn0015790	CG5771	Rab11	Rab-protein 11	42501	3677 // DNA binding // inferred from electronic annotation /// 3924 // GTPase activity // inferred from sequence or structural similarity /// 3924 // GTPase activity // non-traceable author statement /// 5525 // GTP binding // non-traceable author statement /// 5524 // ATP binding // inferred from electronic annotation /// 5525 // GTP binding // inferred from electronic annotation /// 8134 // tra…	160 // two-component signal transduction system (phosphorelay) // inferred from electronic annotation /// 6355 // regulation of transcription, DNA-dependent // inferred from electronic annotation /// 6886 // intracellular protein transport // inferred from electronic annotation /// 6897 // endocytosis // inferred from mutant phenotype /// 6898 // receptor mediated endocytosis // inferred from ele…	5622 // intracellular // inferred from electronic annotation	IPR001806 // Ras GTPase superfamily // 4.0E-101
1928	143127_at	0.577581	1.82469	4.99721	2.09e-05	0.000150522	1.72916	FBgn0000473	CG9438	Cyp6a2	Cytochrome P450-6a2	35587	4497 // monooxygenase activity // inferred from electronic annotation /// 16491 // oxidoreductase activity // inferred from electronic annotation /// 5506 // iron ion binding // inferred from electronic annotation /// 20037 // heme binding // inferred from electronic annotation /// 46872 // metal ion binding // inferred from electronic annotation	6118 // electron transport // inferred from electronic annotation /// 8202 // steroid metabolism // inferred from electronic annotation /// 17085 // response to insecticide // inferred from direct assay	5792 // microsome // non-traceable author statement /// 16020 // membrane // non-traceable author statement /// 16020 // membrane // inferred from electronic annotation	IPR001128 // Cytochrome P450 // 1.0E-126
6475	147674_at	0.577253	1.01096	5.02133	1.95e-05	0.000141424	1.79826	FBgn0034726	CG11301	Mes4	Mes4	37560	3893 // epsilon DNA polymerase activity // inferred from sequence or structural similarity /// 5515 // protein binding // inferred from physical interaction /// 3677 // DNA binding // inferred from electronic annotation /// 43565 // sequence-specific DNA binding // inferred from electronic annotation /// 3893 // epsilon DNA polymerase activity // inferred from sequence similarity	6260 // DNA replication // Unknown /// 6260 // DNA replication // inferred from curator	5634 // nucleus // inferred from sequence or structural similarity /// 8622 // epsilon DNA polymerase complex // Unknown /// 5622 // intracellular // inferred from electronic annotation /// 8622 // epsilon DNA polymerase complex // inferred from curator /// 5634 // nucleus // inferred from sequence similarity	IPR003958 // Transcription factor CBF/NF-Y/archaeal histone // 3.6E-20
12131	153330_at	0.576448	0.998027	6.19342	6.67e-07	6.84e-06	5.17037	FBgn0038964	CG13849	Nop56	Nop56	42633	3729 // mRNA binding // inferred from electronic annotation	16072 // rRNA metabolism // inferred from electronic annotation	5730 // nucleolus // inferred from sequence or structural similarity /// 5730 // nucleolus // non-traceable author statement /// 30532 // small nuclear ribonucleoprotein complex // inferred from sequence or structural similarity /// 5730 // nucleolus // inferred from sequence similarity /// 30532 // small nuclear ribonucleoprotein complex // inferred from sequence similarity	IPR002687 // Pre-mRNA processing ribonucleoprotein, binding region // 5.0E-88
9839	151038_at	0.575729	2.08429	4.34801	0.000134373	0.000780823	-0.110683	FBgn0040551	CG11686	CG11686	CG11686	50024	---	---	---	---
13174	154373_at	0.574724	1.6327	5.82524	1.92e-06	1.75e-05	4.11213	FBgn0082598	CG8580	bhr	bhringi	---	5515 // protein binding // inferred from physical interaction	---	---	---
1153	142352_at	0.573451	1.57463	6.24822	5.71e-07	5.93e-06	5.32739	FBgn0033769	CG8768	CG8768	CG8768	36400	16829 // lyase activity // inferred from electronic annotation /// 16836 // hydro-lyase activity // inferred from electronic annotation /// 16853 // isomerase activity // inferred from electronic annotation /// 16854 // racemase and epimerase activity // inferred from electronic annotation /// 5515 // protein binding // inferred from physical interaction /// 3824 // catalytic activity // inferred…	5975 // carbohydrate metabolism // inferred from electronic annotation /// 5996 // monosaccharide metabolism // inferred from electronic annotation /// 9225 // nucleotide-sugar metabolism // inferred from electronic annotation	---	---
11457	152656_at	0.57236	3.90505	6.98976	7.04e-08	8.83e-07	7.43325	FBgn0020304	CG3365	drongo	drongo	33263	5215 // transporter activity // inferred from electronic annotation	6139 // nucleobase, nucleoside, nucleotide and nucleic acid metabolism // inferred from electronic annotation /// 6810 // transport // inferred from electronic annotation /// 15931 // nucleobase, nucleoside, nucleotide and nucleic acid transport // inferred from electronic annotation /// 43087 // regulation of GTPase activity // inferred from electronic annotation	---	IPR001164 // Human Rev interacting-like protein (hRIP) // 2.5E-28
7137	148336_at	0.572303	0.848248	7.61936	1.24e-08	1.79e-07	9.18372	FBgn0035785	CG8546	CG8546	CG8546	38835	15280 // amiloride-sensitive sodium channel activity // inferred from sequence or structural similarity /// 15280 // amiloride-sensitive sodium channel activity // inferred from sequence similarity	6812 // cation transport // inferred from electronic annotation /// 6814 // sodium ion transport // inferred from electronic annotation	16020 // membrane // inferred from electronic annotation	IPR001873 // Na+ channel, amiloride-sensitive // 7.2E-19 /// IPR001873 // Na+ channel, amiloride-sensitive // 1.8E-64
10325	151524_r_at	0.572148	3.48315	8.12647	3.18e-09	5.18e-08	10.5625	FBgn0053092	CG33092	CG33092	CG33092	326250	3842 // 1-pyrroline-5-carboxylate dehydrogenase activity // inferred from sequence or structural similarity /// 3842 // 1-pyrroline-5-carboxylate dehydrogenase activity // inferred from electronic annotation /// 16491 // oxidoreductase activity // inferred from electronic annotation /// 3842 // 1-pyrroline-5-carboxylate dehydrogenase activity // inferred from sequence similarity	6537 // glutamate biosynthesis // inferred from sequence or structural similarity /// 6562 // proline catabolism // inferred from sequence or structural similarity /// 6561 // proline biosynthesis // inferred from electronic annotation /// 8152 // metabolism // inferred from electronic annotation /// 6537 // glutamate biosynthesis // inferred from sequence similarity /// 6562 // proline catabolis…	5759 // mitochondrial matrix // inferred from sequence or structural similarity /// 5759 // mitochondrial matrix // inferred from electronic annotation /// 5759 // mitochondrial matrix // inferred from sequence similarity	IPR002086 // Aldehyde dehydrogenase // 4.3E-8 /// IPR002086 // Aldehyde dehydrogenase // 1.5E-31 /// IPR002086 // Aldehyde dehydrogenase // 1.7E-9 /// IPR002086 // Aldehyde dehydrogenase // 4.3E-8 /// IPR002086 // Aldehyde dehydrogenase // 1.5E-31 /// IPR002086 // Aldehyde dehydrogenase // 1.7E-9 /// IPR002086 // Aldehyde dehydrogenase // 4.3E-8 /// IPR002086 // Aldehyde dehydrogenase // 1.5E-31 …
4885	146084_at	0.572063	4.4711	4.98794	2.15e-05	0.000153886	1.70262	FBgn0012036	CG3752	Aldh	Aldehyde dehydrogenase	34256	4029 // aldehyde dehydrogenase (NAD) activity // inferred from direct assay /// 4029 // aldehyde dehydrogenase (NAD) activity // inferred from sequence or structural similarity /// 16491 // oxidoreductase activity // inferred from electronic annotation /// 4029 // aldehyde dehydrogenase (NAD) activity // inferred from sequence similarity	6090 // pyruvate metabolism // inferred from sequence or structural similarity /// 8152 // metabolism // inferred from electronic annotation /// 6090 // pyruvate metabolism // inferred from sequence similarity	5737 // cytoplasm // inferred from direct assay /// 5739 // mitochondrion // inferred from direct assay /// 5739 // mitochondrion // inferred from sequence or structural similarity /// 5759 // mitochondrial matrix // inferred from sequence or structural similarity /// 5739 // mitochondrion // inferred from sequence similarity /// 5759 // mitochondrial matrix // inferred from sequence similarity	IPR002086 // Aldehyde dehydrogenase // 1.0E-126
5429	146628_at	0.571281	3.25685	9.58607	7.52e-11	1.69e-09	14.3539	FBgn0033000	---	CG14464	CG14464	---	5515 // protein binding // inferred from physical interaction	---	---	---
402	141601_at	0.571196	1.36853	13.0536	3.07e-14	1.32e-12	22.2695	FBgn0034029	CG8190	eIF2B-	eIF2B-	36722	3743 // translation initiation factor activity // inferred from sequence or structural similarity /// 5085 // guanyl-nucleotide exchange factor activity // inferred from sequence or structural similarity /// 16779 // nucleotidyltransferase activity // inferred from electronic annotation /// 3743 // translation initiation factor activity // inferred from electronic annotation /// 3743 // translati…	6413 // translational initiation // inferred from sequence or structural similarity /// 9058 // biosynthesis // inferred from electronic annotation /// 6413 // translational initiation // inferred from sequence similarity	5829 // cytosol // inferred from sequence or structural similarity /// 5829 // cytosol // non-traceable author statement /// 5851 // eukaryotic translation initiation factor 2B complex // inferred from sequence or structural similarity /// 5851 // eukaryotic translation initiation factor 2B complex // non-traceable author statement /// 5829 // cytosol // inferred from sequence similarity /// 5851…	IPR005835 // Nucleotidyl transferase // 1.3E-7
11553	152752_at	0.570358	2.26234	9.61405	7.02e-11	1.59e-09	14.4239	FBgn0035091	CG3829	CG3829	CG3829	38000	5044 // scavenger receptor activity // non-traceable author statement	6915 // apoptosis // inferred from electronic annotation /// 6952 // defense response // non-traceable author statement /// 7155 // cell adhesion // inferred from electronic annotation /// 35071 // salivary gland cell autophagic cell death // inferred from expression pattern /// 42116 // macrophage activation // inferred from electronic annotation /// 48102 // autophagic cell death // inferred fr…	5887 // integral to plasma membrane // non-traceable author statement /// 16020 // membrane // inferred from electronic annotation	IPR002159 // CD36 antigen // 8.6E-72
2118	143317_at	0.569939	3.24356	7.72469	9.33e-09	1.38e-07	9.47251	FBgn0003205	CG9375	Ras85D	Ras oncogene at 85D	41140	3924 // GTPase activity // inferred from sequence or structural similarity /// 3924 // GTPase activity // non-traceable author statement /// 5525 // GTP binding // inferred from electronic annotation /// 19003 // GDP binding // non-traceable author statement /// 166 // nucleotide binding // inferred from electronic annotation /// 5525 // GTP binding // non-traceable author statement /// 3924 // G…	82 // G1/S transition of mitotic cell cycle // traceable author statement /// 1558 // regulation of cell growth // traceable author statement /// 1708 // cell fate specification // traceable author statement /// 6886 // intracellular protein transport // inferred from electronic annotation /// 6898 // receptor mediated endocytosis // inferred from electronic annotation /// 6916 // anti-apoptosis …	5622 // intracellular // inferred from electronic annotation /// 16020 // membrane // inferred from electronic annotation	IPR001806 // Ras GTPase superfamily // 1.5E-93
13454	154653_at	0.56859	3.38894	6.39607	3.75e-07	4.06e-06	5.75026	FBgn0010238	CG12369	Lac	Lachesin	36363	5515 // protein binding // inferred from electronic annotation	7156 // homophilic cell adhesion // inferred from direct assay /// 7165 // signal transduction // inferred from electronic annotation /// 7409 // axonogenesis // inferred from sequence or structural similarity /// 7424 // tracheal system development (sensu Insecta) // inferred from expression pattern /// 7424 // tracheal system development (sensu Insecta) // inferred from mutant phenotype /// 163…	5918 // septate junction // inferred from direct assay /// 19898 // extrinsic to membrane // non-traceable author statement /// 16020 // membrane // inferred from electronic annotation	IPR007110 // Immunoglobulin-like // 4.1E-9 /// IPR007110 // Immunoglobulin-like // 2.8E-11 /// IPR007110 // Immunoglobulin-like // 8.8E-4 /// IPR007110 // Immunoglobulin-like // 8.8E-4
465	141664_at	0.567735	2.55967	9.70351	5.64e-11	1.3e-09	14.647	FBgn0015245	CG12101	Hsp60	Heat shock protein 60	32045	5524 // ATP binding // inferred from electronic annotation /// 42623 // ATPase activity, coupled // inferred from electronic annotation /// 51082 // unfolded protein binding // inferred from sequence or structural similarity /// 166 // nucleotide binding // inferred from electronic annotation /// 5515 // protein binding // inferred from electronic annotation /// 51082 // unfolded protein binding …	6457 // protein folding // inferred from sequence or structural similarity /// 6457 // protein folding // non-traceable author statement /// 6458 // 'de novo' protein folding // inferred from sequence or structural similarity /// 6626 // protein targeting to mitochondrion // inferred from sequence or structural similarity /// 6950 // response to stress // non-traceable author statement /// 9408 /…	5739 // mitochondrion // inferred from direct assay /// 5759 // mitochondrial matrix // inferred from sequence or structural similarity /// 5759 // mitochondrial matrix // non-traceable author statement /// 5739 // mitochondrion // inferred from electronic annotation /// 5759 // mitochondrial matrix // inferred from sequence similarity	IPR002423 // Chaperonin Cpn60/TCP-1 // 1.0E-126
7777	148976_at	0.56714	2.31544	8.24322	2.33e-09	3.97e-08	10.8756	FBgn0036756	CG5582	cln3	cln3	39981	---	19226 // transmission of nerve impulse // inferred from electronic annotation	16020 // membrane // inferred from electronic annotation	IPR003492 // Battens disease protein Cln3 // 2.5E-69 /// IPR003492 // Battens disease protein Cln3 // 6.1E-67
13510	154709_at	0.56704	1.79702	6.44342	3.27e-07	3.6e-06	5.88542	FBgn0030321	CG1703	CG1703	CG1703	32112	166 // nucleotide binding // inferred from electronic annotation /// 5215 // transporter activity // inferred from sequence or structural similarity /// 5524 // ATP binding // inferred from electronic annotation /// 42626 // ATPase activity, coupled to transmembrane movement of substances // inferred from sequence or structural similarity /// 16887 // ATPase activity // inferred from electronic a…	6810 // transport // inferred from electronic annotation	43190 // ATP-binding cassette (ABC) transporter complex // inferred from sequence or structural similarity /// 16020 // membrane // inferred from electronic annotation /// 43190 // ATP-binding cassette (ABC) transporter complex // inferred from sequence similarity	IPR003439 // ABC transporter // 8.8E-31 /// IPR003439 // ABC transporter // 3.3E-40 /// IPR003439 // ABC transporter // 2.3E-24 /// IPR003439 // ABC transporter // 3.3E-40
2603	143802_at	0.565995	0.981795	8.22592	2.44e-09	4.12e-08	10.8293	FBgn0015351	CG14906	CG14906	CG14906	42030	8168 // methyltransferase activity // inferred from electronic annotation	6139 // nucleobase, nucleoside, nucleotide and nucleic acid metabolism // inferred from electronic annotation	5634 // nucleus // inferred from electronic annotation	IPR007757 // MT-A70 // 9.4E-92
6404	147603_at	0.565861	2.14553	8.62903	8.49e-10	1.58e-08	11.8985	FBgn0034592	CG9406	CG9406	CG9406	37405	5509 // calcium ion binding // inferred from electronic annotation	---	---	IPR002048 // Calcium-binding EF-hand // 0.43 /// IPR002048 // Calcium-binding EF-hand // 0.15
6120	147319_at	0.565509	3.10555	4.39446	0.000117749	0.000696353	0.0192539	FBgn0034140	CG8317	CG8317	CG8317	36853	---	---	---	---
10529	151728_at	0.565128	2.0291	10.0538	2.41e-11	6.03e-10	15.5105	FBgn0038953	CG18596	CG18596	CG18596	42622	3723 // RNA binding // inferred from electronic annotation /// 8173 // RNA methyltransferase activity // inferred from electronic annotation	6396 // RNA processing // inferred from electronic annotation	---	IPR001537 // tRNA/rRNA methyltransferase (SpoU) // 6.7E-5
11348	152547_at	0.564639	3.4636	11.8511	3.9e-13	1.39e-11	19.6924	FBgn0033385	CG8055	CG8055	CG8055	35933	5386 // carrier activity // inferred from electronic annotation /// 5488 // binding // inferred from electronic annotation /// 5515 // protein binding // inferred from physical interaction /// 42802 // identical protein binding // inferred from physical interaction	6886 // intracellular protein transport // inferred from electronic annotation	---	IPR005024 // Snf7 // 4.7E-72
12879	154078_at	0.564609	4.14292	7.30044	2.97e-08	4.03e-07	8.302	FBgn0014469	CG2060	Cyp4e2	Cytochrome P450-4e2	35822	4497 // monooxygenase activity // inferred from electronic annotation /// 16491 // oxidoreductase activity // inferred from electronic annotation /// 5515 // protein binding // inferred from physical interaction /// 5506 // iron ion binding // inferred from electronic annotation /// 20037 // heme binding // inferred from electronic annotation /// 46872 // metal ion binding // inferred from electr…	6118 // electron transport // inferred from electronic annotation /// 8202 // steroid metabolism // inferred from electronic annotation	5792 // microsome // non-traceable author statement /// 16020 // membrane // non-traceable author statement /// 5783 // endoplasmic reticulum // inferred from electronic annotation /// 5792 // microsome // inferred from electronic annotation /// 16020 // membrane // inferred from electronic annotation	IPR001128 // Cytochrome P450 // 2.3E-94
2868	144067_at	0.564296	1.46659	8.18924	2.69e-09	4.5e-08	10.731	FBgn0025558	CG4101	CG4101	CG4101	39857	---	---	16021 // integral to membrane // non-traceable author statement /// 16020 // membrane // inferred from electronic annotation /// 16021 // integral to membrane // inferred from electronic annotation	IPR009621 // Protein of unknown function UPF0239 // 3.2E-55
2476	143675_at	0.563091	1.19304	7.78149	8e-09	1.2e-07	9.62773	FBgn0011674	CG11312	insc	inscuteable	37355	5515 // protein binding // inferred from physical interaction /// 8093 // cytoskeletal adaptor activity // inferred from mutant phenotype /// 8093 // cytoskeletal adaptor activity // inferred from sequence or structural similarity /// 8093 // cytoskeletal adaptor activity // non-traceable author statement /// 5488 // binding // inferred from electronic annotation /// 8093 // cytoskeletal adaptor …	6403 // RNA localization // inferred from mutant phenotype /// 7010 // cytoskeleton organization and biogenesis // non-traceable author statement /// 7400 // neuroblast fate determination // traceable author statement /// 7422 // peripheral nervous system development // inferred from mutant phenotype /// 7423 // sensory organ development // traceable author statement /// 7525 // somatic muscle de…	5737 // cytoplasm // inferred from direct assay /// 5938 // cell cortex // inferred from direct assay /// 45177 // apical part of cell // non-traceable author statement /// 45179 // apical cortex // inferred from direct assay /// 45179 // apical cortex // traceable author statement	---
12209	153408_at	0.562876	2.17127	7.57512	1.4e-08	1.99e-07	9.06206	FBgn0051324	CG31324	CG31324	CG31324	43177	---	---	---	---
13368	154567_at	0.562477	1.9752	9.14047	2.29e-10	4.71e-09	13.2254	FBgn0037687	CG8132	CG8132	CG8132	41121	257 // nitrilase activity // inferred from sequence or structural similarity /// 16810 // hydrolase activity, acting on carbon-nitrogen (but not peptide) bonds // inferred from electronic annotation /// 257 // nitrilase activity // inferred from sequence similarity	6807 // nitrogen compound metabolism // inferred from electronic annotation	---	IPR003010 // Nitrilase/cyanide hydratase and apolipoprotein N-acyltransferase // 8.3E-50
4481	145680_at	0.562096	1.93885	6.79473	1.21e-07	1.44e-06	6.88341	FBgn0051694	CG31694	CG31694	CG31694	33489	5102 // receptor binding // inferred from electronic annotation /// 16787 // hydrolase activity // inferred from electronic annotation /// 16799 // hydrolase activity, hydrolyzing N-glycosyl compounds // inferred from electronic annotation	7275 // development // inferred from electronic annotation /// 7398 // ectoderm development // inferred from electronic annotation /// 7399 // nervous system development // inferred from electronic annotation	---	IPR006921 // Interferon-related protein conserved region // 1.4E-16 /// IPR007701 // Interferon-related developmental regulator // 1.0E-126
9807	151006_at	0.560781	4.40108	7.40398	2.24e-08	3.09e-07	8.58944	FBgn0040519	CG15219	CG15219	CG15219	49992	---	---	---	---
6270	147469_at	0.557496	4.91683	6.96007	7.64e-08	9.51e-07	7.34978	FBgn0034398	CG15098	CG15098	CG15098	37174	---	---	---	---
13972	AFFX-BioDn-3_at	0.556761	4.1216	3.80105	0.000622553	0.00289478	-1.61009	---	---	---	---	---	4015 // adenosylmethionine-8-amino-7-oxononanoate transaminase activity // inferred from electronic annotation /// 8483 // transaminase activity // inferred from electronic annotation /// 16740 // transferase activity // inferred from electronic annotation /// 30170 // pyridoxal phosphate binding // inferred from electronic annotation /// 3824 // catalytic activity // inferred from electronic ann…	9102 // biotin biosynthesis // inferred from electronic annotation /// 8152 // metabolism // inferred from electronic annotation /// 9058 // biosynthesis // inferred from electronic annotation /// 9236 // cobalamin biosynthesis // inferred from electronic annotation	---	---
11510	152709_at	0.556494	2.45678	5.34722	7.61e-06	6.06e-05	2.73479	FBgn0041194	CG10078	Prat2	Phosphoribosylamidotransferase 2	38753	4044 // amidophosphoribosyltransferase activity // inferred from sequence or structural similarity /// 4182 // carboxypeptidase A activity // inferred from electronic annotation /// 5515 // protein binding // inferred from physical interaction /// 4044 // amidophosphoribosyltransferase activity // inferred from electronic annotation /// 16740 // transferase activity // inferred from electronic an…	5996 // monosaccharide metabolism // inferred from electronic annotation /// 6144 // purine base metabolism // inferred from electronic annotation /// 6189 // 'de novo' IMP biosynthesis // inferred from sequence or structural similarity /// 6508 // proteolysis // inferred from electronic annotation /// 9113 // purine base biosynthesis // inferred from electronic annotation /// 9116 // nucleoside …	---	IPR000583 // Glutamine amidotransferase, class-II // 3.9E-48 /// IPR000836 // Phosphoribosyltransferase // 3.7E-7 /// IPR000583 // Glutamine amidotransferase, class-II // 1.3E-40 /// IPR000836 // Phosphoribosyltransferase // 3.7E-7
13822	155021_at	0.554945	2.55762	6.29743	4.96e-07	5.23e-06	5.46826	FBgn0038932 /// FBgn0053334	CG5740	CG5740 /// CG33334	CG5740 /// CG33334	2768675 /// 42600	5200 // structural constituent of cytoskeleton // inferred from electronic annotation	7010 // cytoskeleton organization and biogenesis // inferred from electronic annotation	---	---
11001	152200_at	0.554707	0.882551	8.38345	1.61e-09	2.8e-08	11.2495	FBgn0003308	CG7642	ry	rosy	41605	4854 // xanthine dehydrogenase activity // non-traceable author statement /// 4854 // xanthine dehydrogenase activity // traceable author statement /// 4854 // xanthine dehydrogenase activity // inferred from electronic annotation /// 5506 // iron ion binding // inferred from electronic annotation /// 16491 // oxidoreductase activity // inferred from electronic annotation /// 30151 // molybdenum …	6118 // electron transport // inferred from electronic annotation /// 6144 // purine base metabolism // inferred from electronic annotation /// 6800 // oxygen and reactive oxygen species metabolism // inferred from electronic annotation /// 6952 // defense response // inferred from electronic annotation /// 48072 // eye pigmentation (sensu Endopterygota) // traceable author statement	5777 // peroxisome // non-traceable author statement /// 5777 // peroxisome // inferred from electronic annotation	IPR008274 // Aldehyde oxidase and xanthine dehydrogenase, molybdopterin binding // 1.0E-126 /// IPR000674 // Aldehyde oxidase and xanthine dehydrogenase, a/b hammerhead // 1.8E-61 /// IPR002346 // Molybdopterin dehydrogenase, FAD-binding // 1.0E-100 /// IPR002888 // [2Fe-2S]-binding // 1.3E-62 /// IPR005107 // CO dehydrogenase flavoprotein C-terminal domain // 2.9E-57 /// IPR001041 // Ferredoxin …
13052	154251_at	0.553554	2.71975	9.23087	1.82e-10	3.84e-09	13.4564	FBgn0028388	---	capt	capulet	---	---	902 // cellular morphogenesis // inferred from mutant phenotype /// 7015 // actin filament organization // inferred from mutant phenotype /// 7456 // eye development (sensu Endopterygota) // inferred from mutant phenotype /// 8103 // oocyte microtubule cytoskeleton polarization // inferred from mutant phenotype /// 8154 // actin polymerization and/or depolymerization // inferred from mutant pheno…	16020 // membrane // inferred from electronic annotation	---
12949	154148_at	0.550778	3.98988	4.7789	3.92e-05	0.000262558	1.10561	FBgn0036974	CG5605	eRF1	eukaryotic release factor 1	40240	3747 // translation release factor activity // non-traceable author statement /// 8079 // translation termination factor activity // inferred from sequence or structural similarity /// 16149 // translation release factor activity, codon specific // inferred from electronic annotation /// 5515 // protein binding // inferred from physical interaction /// 8079 // translation termination factor activ…	6415 // translational termination // inferred from mutant phenotype /// 6415 // translational termination // inferred from sequence or structural similarity /// 6415 // translational termination // non-traceable author statement /// 6605 // protein targeting // non-traceable author statement /// 7224 // smoothened signaling pathway // inferred from genetic interaction /// 35071 // salivary gland …	5737 // cytoplasm // non-traceable author statement /// 5829 // cytosol // inferred from sequence or structural similarity /// 18444 // translation release factor complex // non-traceable author statement /// 5737 // cytoplasm // inferred from electronic annotation /// 5829 // cytosol // inferred from sequence similarity	IPR005141 // eRF1 domain 2 // 3.3E-73 /// IPR005142 // eRF1 domain 3 // 2.8E-74 /// IPR005140 // eRF1 domain 1 // 2.3E-68
6147	147346_at	0.550075	0.994183	10.2375	1.55e-11	4.11e-10	15.9568	FBgn0034184	CG9646	CG9646	CG9646	36918	---	---	---	---
11675	152874_at	0.549688	3.50422	6.52193	2.62e-07	2.91e-06	6.1092	FBgn0050015	CG30015	CG30015	CG30015	36147	---	---	---	---
12667	153866_at	0.548717	3.30365	3.78836	0.000644706	0.00298097	-1.64406	FBgn0016926	CG4710	smi21F	smell impaired 21F	33288	---	42048 // olfactory behavior // inferred from mutant phenotype /// 42221 // response to chemical stimulus // inferred from mutant phenotype	---	---
1478	142677_s_at	0.547478	3.60921	4.62482	6.1e-05	0.000390496	0.668101	FBgn0020386	CG1210	Pk61C	Protein kinase 61C	38017	4672 // protein kinase activity // non-traceable author statement /// 4674 // protein serine/threonine kinase activity // inferred from sequence or structural similarity /// 4674 // protein serine/threonine kinase activity // non-traceable author statement /// 4702 // receptor signaling protein serine/threonine kinase activity // inferred from electronic annotation /// 5249 // voltage-gated potas…	1558 // regulation of cell growth // inferred from mutant phenotype /// 5977 // glycogen metabolism // inferred from electronic annotation /// 6468 // protein amino acid phosphorylation // inferred from direct assay /// 6468 // protein amino acid phosphorylation // inferred from sequence or structural similarity /// 6468 // protein amino acid phosphorylation // non-traceable author statement /// …	5737 // cytoplasm // inferred from sequence or structural similarity /// 5886 // plasma membrane // inferred from sequence or structural similarity /// 8076 // voltage-gated potassium channel complex // inferred from electronic annotation /// 5737 // cytoplasm // inferred from sequence similarity /// 5886 // plasma membrane // inferred from sequence similarity	IPR000719 // Protein kinase // 3.8E-39 /// IPR000719 // Protein kinase // 5.4E-29 /// IPR000719 // Protein kinase // 3.8E-39 /// IPR000719 // Protein kinase // 5.4E-29 /// IPR000719 // Protein kinase // 3.8E-39 /// IPR000719 // Protein kinase // 5.4E-29 /// IPR000719 // Protein kinase // 1.9E-24 /// IPR000719 // Protein kinase // 5.4E-29
1193	142392_at	0.546755	4.53527	6.64044	1.87e-07	2.15e-06	6.44622	FBgn0042189	CG17376	CG17376	CG17376	59227	---	---	---	---
8832	150031_at	0.54393	2.76237	5.21289	1.12e-05	8.59e-05	2.34824	FBgn0038450	CG17560	CG17560	CG17560	42022	16491 // oxidoreductase activity // inferred from electronic annotation	---	---	IPR004262 // Male sterility protein // 4.2E-115
9870	151069_at	0.543349	4.21249	2.49461	0.0180631	0.0457035	-4.80611	FBgn0040582	CG5791	CG5791	CG5791	50055	---	---	---	---
5278	146477_at	0.542327	2.73021	7.04198	6.08e-08	7.77e-07	7.57992	FBgn0032755	CG17344	CG17344	CG17344	35185	---	---	---	---
590	141789_at	0.539731	1.59369	6.29899	4.94e-07	5.22e-06	5.47273	FBgn0010812	CG2708	Tom34	Translocase of outer membrane 34	44910	3910 // DNA ligase (ATP) activity // inferred from electronic annotation /// 5386 // carrier activity // inferred from electronic annotation /// 5524 // ATP binding // inferred from electronic annotation /// 5488 // binding // inferred from electronic annotation	6260 // DNA replication // inferred from electronic annotation /// 6281 // DNA repair // inferred from electronic annotation /// 6310 // DNA recombination // inferred from electronic annotation	5742 // mitochondrial outer membrane translocase complex // inferred from sequence or structural similarity /// 5742 // mitochondrial outer membrane translocase complex // inferred from sequence similarity	IPR001440 // TPR repeat // 1.3E-4 /// IPR001440 // TPR repeat // 2.9E-9 /// IPR001440 // TPR repeat // 1.4E-4
8480	149679_at	0.539649	1.7341	8.44374	1.38e-09	2.43e-08	11.4095	FBgn0037883	CG14701	CG14701	CG14701	41352	8270 // zinc ion binding // inferred from electronic annotation /// 46872 // metal ion binding // inferred from electronic annotation	---	---	IPR007872 // CSL zinc finger // 2.9E-33
3502	144701_at	0.539514	3.35101	7.16182	4.36e-08	5.7e-07	7.91552	FBgn0030041	CG12116	CG12116	CG12116	31782	4757 // sepiapterin reductase activity // inferred from sequence or structural similarity /// 5515 // protein binding // inferred from physical interaction /// 16491 // oxidoreductase activity // inferred from electronic annotation /// 4757 // sepiapterin reductase activity // inferred from sequence similarity	8152 // metabolism // inferred from electronic annotation	---	---
13661	154860_at	0.53864	3.05111	10.4759	8.81e-12	2.46e-10	16.5298	FBgn0020249	CG7954	stck	steamer duck	40999	5200 // structural constituent of cytoskeleton // inferred from electronic annotation /// 8270 // zinc ion binding // inferred from electronic annotation /// 46872 // metal ion binding // inferred from electronic annotation	6928 // cell motility // inferred from electronic annotation /// 7010 // cytoskeleton organization and biogenesis // inferred from electronic annotation /// 7475 // apposition of dorsal and ventral wing surfaces // inferred from mutant phenotype	---	IPR001781 // Zn-binding protein, LIM // 2.8E-20 /// IPR001781 // Zn-binding protein, LIM // 1.3E-11 /// IPR001781 // Zn-binding protein, LIM // 1.9E-9 /// IPR001781 // Zn-binding protein, LIM // 8.0E-22 /// IPR001781 // Zn-binding protein, LIM // 4.8E-19 /// IPR001781 // Zn-binding protein, LIM // 2.8E-20 /// IPR001781 // Zn-binding protein, LIM // 1.3E-11 /// IPR001781 // Zn-binding protein, LIM…
5137	146336_at	0.538431	5.22764	6.72701	1.47e-07	1.72e-06	6.69174	FBgn0032518	CG9282	RpL24	Ribosomal protein L24	34754	3676 // nucleic acid binding // inferred from electronic annotation /// 3735 // structural constituent of ribosome // inferred from sequence or structural similarity /// 5515 // protein binding // inferred from physical interaction /// 3735 // structural constituent of ribosome // inferred from electronic annotation /// 3735 // structural constituent of ribosome // inferred from sequence similari…	6412 // protein biosynthesis // inferred from sequence or structural similarity /// 6412 // protein biosynthesis // inferred from electronic annotation /// 6412 // protein biosynthesis // inferred from sequence similarity	5842 // cytosolic large ribosomal subunit (sensu Eukaryota) // inferred from sequence or structural similarity /// 5622 // intracellular // inferred from electronic annotation /// 5840 // ribosome // inferred from electronic annotation /// 30529 // ribonucleoprotein complex // inferred from electronic annotation /// 5842 // cytosolic large ribosomal subunit (sensu Eukaryota) // inferred from sequ…	IPR000988 // Ribosomal protein L24E // 7.7E-37
1873	143072_at	0.537749	6.205	4.26166	0.000171653	0.000964047	-0.351297	FBgn0000094	CG1361	Anp	Andropin	43595	---	6962 // male-specific antibacterial humoral response // inferred from direct assay /// 6962 // male-specific antibacterial humoral response // non-traceable author statement /// 6965 // anti-Gram-positive bacterial polypeptide induction // inferred from direct assay /// 9617 // response to bacteria // traceable author statement /// 50830 // defense response to Gram-positive bacteria // inferred f…	5576 // extracellular region // inferred from direct assay	---
13421	154620_at	0.536271	1.51451	7.22582	3.65e-08	4.88e-07	8.0942	FBgn0032340	CG6181	CG6181	CG6181	34541	---	---	---	---
3569	144768_at	0.536183	0.628798	5.57397	3.95e-06	3.37e-05	3.3881	FBgn0052695	CG32695	CG32695	CG32695	31918	---	---	---	---
2337	143536_at	0.535843	2.76485	5.13495	1.4e-05	0.000105264	2.12425	FBgn0004915	CG5193	TfIIB	Transcription factor IIB	34430	8134 // transcription factor binding // inferred from physical interaction /// 16251 // general RNA polymerase II transcription factor activity // inferred from sequence or structural similarity /// 5515 // protein binding // inferred from physical interaction /// 3702 // RNA polymerase II transcription factor activity // inferred from electronic annotation /// 8270 // zinc ion binding // inferre…	6357 // regulation of transcription from RNA polymerase II promoter // non-traceable author statement /// 6367 // transcription initiation from RNA polymerase II promoter // inferred from sequence or structural similarity /// 51101 // regulation of DNA binding // inferred from direct assay /// 6350 // transcription // inferred from electronic annotation /// 6352 // transcription initiation // inf…	5634 // nucleus // non-traceable author statement /// 5667 // transcription factor complex // inferred from sequence or structural similarity /// 5634 // nucleus // inferred from electronic annotation /// 5667 // transcription factor complex // inferred from electronic annotation /// 5667 // transcription factor complex // inferred from sequence similarity	IPR000812 // Transcription factor TFIIB // 8.6E-36 /// IPR000812 // Transcription factor TFIIB // 1.8E-37
11105	152304_at	0.535317	4.83867	7.77604	8.12e-09	1.22e-07	9.61285	FBgn0037643	CG11963	CG11963	CG11963	41067	4775 // succinate-CoA ligase (ADP-forming) activity // inferred from sequence or structural similarity /// 3824 // catalytic activity // inferred from electronic annotation /// 4775 // succinate-CoA ligase (ADP-forming) activity // inferred from sequence similarity	6099 // tricarboxylic acid cycle // inferred from sequence or structural similarity /// 8152 // metabolism // inferred from electronic annotation /// 6099 // tricarboxylic acid cycle // inferred from sequence similarity	9361 // succinate-CoA ligase complex (ADP-forming) // inferred from sequence or structural similarity /// 9361 // succinate-CoA ligase complex (ADP-forming) // inferred from sequence similarity	IPR003135 // ATP-dependent carboxylate-amine ligase-like, ATP-grasp // 1.2E-19 /// IPR005811 // ATP-citrate lyase/succinyl-CoA ligase // 7.9E-77
10871	152070_at	0.535221	4.59833	9.85164	3.92e-11	9.45e-10	15.0141	FBgn0030521	CG10992	CG10992	CG10992	32341	4213 // cathepsin B activity // inferred from sequence or structural similarity /// 5515 // protein binding // inferred from physical interaction /// 4197 // cysteine-type endopeptidase activity // inferred from electronic annotation /// 8233 // peptidase activity // inferred from electronic annotation /// 8234 // cysteine-type peptidase activity // inferred from electronic annotation /// 16787 /…	6508 // proteolysis // inferred from electronic annotation /// 35071 // salivary gland cell autophagic cell death // inferred from expression pattern /// 48102 // autophagic cell death // inferred from expression pattern	---	IPR000668 // Peptidase C1A, papain // 8.3E-114
4899	146098_at	0.534901	0.989392	9.90792	3.42e-11	8.37e-10	15.1528	FBgn0015393	CG3949	hoip	hoi-polloi	44173	3729 // mRNA binding // inferred from sequence or structural similarity /// 3735 // structural constituent of ribosome // inferred from electronic annotation /// 5515 // protein binding // inferred from physical interaction /// 5096 // GTPase activator activity // inferred from electronic annotation /// 5488 // binding // inferred from electronic annotation /// 3729 // mRNA binding // inferred fr…	398 // nuclear mRNA splicing, via spliceosome // inferred from sequence or structural similarity /// 6412 // protein biosynthesis // inferred from electronic annotation /// 7399 // nervous system development // inferred from mutant phenotype /// 7422 // peripheral nervous system development // traceable author statement /// 132 // establishment of mitotic spindle orientation // inferred from muta…	5634 // nucleus // non-traceable author statement /// 5681 // spliceosome complex // inferred from sequence or structural similarity /// 5840 // ribosome // inferred from electronic annotation /// 30532 // small nuclear ribonucleoprotein complex // inferred from sequence or structural similarity /// 5634 // nucleus // inferred from electronic annotation /// 30529 // ribonucleoprotein complex // i…	IPR004038 // Ribosomal protein L7Ae/L30e/S12e/Gadd45 // 1.5E-36
8268	149467_at	0.534698	2.70133	7.3234	2.79e-08	3.8e-07	8.36584	FBgn0037533	CG2791	CG2791	CG2791	40941	---	---	---	---
11212	152411_at	0.534186	1.0313	7.11425	4.98e-08	6.44e-07	7.78247	FBgn0037439	CG10286	CG10286	CG10286	40786	5488 // binding // inferred from electronic annotation	---	---	---
10368	151567_at	0.533559	2.91602	8.15502	2.94e-09	4.85e-08	10.6392	FBgn0039844	CG1607	CG1607	CG1607	43707	5279 // amino acid-polyamine transporter activity // inferred from electronic annotation /// 15171 // amino acid transporter activity // inferred from sequence or structural similarity /// 15171 // amino acid transporter activity // inferred from sequence similarity	6520 // amino acid metabolism // inferred from electronic annotation /// 6865 // amino acid transport // inferred from electronic annotation	16020 // membrane // inferred from electronic annotation	IPR004841 // Amino acid permease-associated region // 2.0E-6 /// IPR004841 // Amino acid permease-associated region // 5.9E-12
5064	146263_at	0.533336	0.91444	13.7476	7.63e-15	3.75e-13	23.6815	FBgn0032390	CG16969	CG16969	CG16969	34610	5515 // protein binding // inferred from physical interaction	---	---	---
13121	154320_at	0.531642	1.36085	5.43218	5.95e-06	4.86e-05	2.97949	FBgn0001291	CG2275	Jra	Jun-related antigen	36057	3677 // DNA binding // inferred from electronic annotation /// 3700 // transcription factor activity // inferred from electronic annotation /// 3702 // RNA polymerase II transcription factor activity // inferred from sequence or structural similarity /// 3704 // specific RNA polymerase II transcription factor activity // non-traceable author statement /// 5515 // protein binding // inferred from …	165 // MAPKKK cascade // traceable author statement /// 1736 // establishment of planar polarity // non-traceable author statement /// 6357 // regulation of transcription from RNA polymerase II promoter // non-traceable author statement /// 7254 // JNK cascade // inferred from genetic interaction /// 7254 // JNK cascade // inferred from mutant phenotype /// 7254 // JNK cascade // traceable author…	5634 // nucleus // inferred from direct assay /// 5634 // nucleus // inferred from sequence or structural similarity /// 5634 // nucleus // non-traceable author statement /// 5737 // cytoplasm // inferred from direct assay /// 5634 // nucleus // inferred from electronic annotation /// 5634 // nucleus // inferred from sequence similarity	IPR004827 // Basic-leucine zipper (bZIP) transcription factor // 8.7E-26 /// IPR005643 // Jun-like transcription factor // 9.6E-107
38	141237_at	0.53096	2.63505	9.2808	1.61e-10	3.4e-09	13.5836	FBgn0036661	CG9705	CG9705	CG9705	39875	3676 // nucleic acid binding // inferred from electronic annotation /// 3677 // DNA binding // inferred from electronic annotation /// 3729 // mRNA binding // inferred from electronic annotation	6355 // regulation of transcription, DNA-dependent // inferred from electronic annotation /// 7165 // signal transduction // inferred from electronic annotation /// 7242 // intracellular signaling cascade // inferred from electronic annotation /// 19722 // calcium-mediated signaling // inferred from electronic annotation	---	IPR002059 // Cold-shock DNA-binding domain // 1.1E-11
3444	144643_at	0.530852	1.62162	7.17747	4.18e-08	5.49e-07	7.95926	FBgn0029940	CG1958	CG1958	CG1958	31661	42802 // identical protein binding // inferred from physical interaction	---	---	---
12783	153982_at	0.530804	0.959613	6.37558	3.97e-07	4.28e-06	5.69173	FBgn0015019	CG8977	Cct	Cct	42029	5524 // ATP binding // inferred from electronic annotation /// 42623 // ATPase activity, coupled // inferred from sequence or structural similarity /// 42623 // ATPase activity, coupled // non-traceable author statement /// 51082 // unfolded protein binding // inferred from sequence or structural similarity /// 166 // nucleotide binding // inferred from electronic annotation /// 5515 // protein b…	6457 // protein folding // inferred from sequence or structural similarity /// 6457 // protein folding // non-traceable author statement /// 6457 // protein folding // inferred from electronic annotation /// 44267 // cellular protein metabolism // inferred from electronic annotation /// 6457 // protein folding // inferred from sequence similarity	5737 // cytoplasm // non-traceable author statement /// 5832 // chaperonin-containing T-complex // inferred from sequence or structural similarity /// 5832 // chaperonin-containing T-complex // inferred from sequence similarity	IPR002423 // Chaperonin Cpn60/TCP-1 // 1.0E-126
1595	142794_at	0.530659	3.19641	6.12615	8.09e-07	8.11e-06	4.97738	FBgn0017581	CG17342	Lk6	Lk6	44672	4672 // protein kinase activity // inferred from direct assay /// 4674 // protein serine/threonine kinase activity // inferred from sequence or structural similarity /// 4674 // protein serine/threonine kinase activity // non-traceable author statement /// 4702 // receptor signaling protein serine/threonine kinase activity // inferred from electronic annotation /// 5524 // ATP binding // inferred…	6468 // protein amino acid phosphorylation // non-traceable author statement /// 7017 // microtubule-based process // inferred from mutant phenotype /// 7242 // intracellular signaling cascade // inferred from electronic annotation /// 40008 // regulation of growth // inferred from mutant phenotype /// 6468 // protein amino acid phosphorylation // inferred from electronic annotation	5635 // nuclear envelope // inferred from direct assay /// 5737 // cytoplasm // inferred from direct assay /// 5813 // centrosome // inferred from direct assay /// 5874 // microtubule // inferred from direct assay	IPR000719 // Protein kinase // 8.1E-76 /// IPR000719 // Protein kinase // 8.1E-76
2075	143274_at	0.53028	4.70288	6.83144	1.1e-07	1.31e-06	6.98716	FBgn0002862	CG17956	Mst87F	Male-specific RNA 87F	41693	5506 // iron ion binding // inferred from electronic annotation	6118 // electron transport // inferred from electronic annotation	---	---
4900	146099_at	0.530132	1.37728	4.14017	0.000241867	0.00128257	-0.687585	FBgn0032139	CG13116	CG13116	CG13116	34288	---	---	---	---
13332	154531_at	0.530088	3.73299	8.14143	3.05e-09	5.02e-08	10.6027	FBgn0036887	CG9231	CG9231	CG9231	40130	---	---	---	IPR009432 // Protein of unknown function DUF1075 // 1.2E-20
11085	152284_at	0.52917	2.82367	8.13941	3.07e-09	5.03e-08	10.5972	FBgn0034577	CG10540	CG10540	CG10540	37387	3779 // actin binding // inferred from electronic annotation /// 5200 // structural constituent of cytoskeleton // inferred from electronic annotation /// 5515 // protein binding // inferred from physical interaction	7015 // actin filament organization // inferred from mutant phenotype /// 7018 // microtubule-based movement // inferred from sequence or structural similarity /// 30036 // actin cytoskeleton organization and biogenesis // non-traceable author statement /// 51016 // barbed-end actin filament capping // inferred from sequence or structural similarity /// 51016 // barbed-end actin filament capping …	5869 // dynactin complex // inferred from sequence or structural similarity /// 5875 // microtubule associated complex // inferred from electronic annotation /// 8290 // F-actin capping protein complex // non-traceable author statement /// 8290 // F-actin capping protein complex // inferred from electronic annotation /// 5869 // dynactin complex // inferred from sequence similarity	IPR002189 // F-actin capping protein, alpha subunit // 1.0E-126
7939	149138_at	0.52904	1.77362	7.37065	2.45e-08	3.37e-07	8.49703	FBgn0037011	CG4858	CG4858	CG4858	40282	166 // nucleotide binding // inferred from sequence or structural similarity /// 5524 // ATP binding // inferred from electronic annotation /// 5515 // protein binding // inferred from physical interaction /// 166 // nucleotide binding // inferred from sequence similarity	---	---	---
2191	143390_at	0.528296	4.75729	3.19228	0.00319707	0.0112286	-3.18534	FBgn0003887	CG9277	Tub56D	Tubulin at 56D	37238	3924 // GTPase activity // inferred from electronic annotation /// 5200 // structural constituent of cytoskeleton // Unknown /// 5200 // structural constituent of cytoskeleton // inferred from sequence or structural similarity /// 5525 // GTP binding // inferred from sequence or structural similarity /// 15631 // tubulin binding // inferred from electronic annotation /// 166 // nucleotide binding…	6886 // intracellular protein transport // inferred from electronic annotation /// 6928 // cell motility // inferred from electronic annotation /// 7010 // cytoskeleton organization and biogenesis // inferred from electronic annotation /// 7017 // microtubule-based process // inferred from sequence or structural similarity /// 7018 // microtubule-based movement // inferred from electronic annotat…	5874 // microtubule // inferred from direct assay /// 5874 // microtubule // inferred from sequence or structural similarity /// 5874 // microtubule // non-traceable author statement /// 45298 // tubulin // inferred from sequence or structural similarity /// 5737 // cytoplasm // inferred from electronic annotation /// 5874 // microtubule // inferred from electronic annotation /// 43234 // protein…	IPR003008 // Tubulin/FtsZ, GTPase // 2.1E-112 /// IPR008280 // Tubulin/FtsZ, C-terminal // 2.2E-82 /// IPR003008 // Tubulin/FtsZ, GTPase // 5.7E-94 /// IPR008280 // Tubulin/FtsZ, C-terminal // 2.2E-82 /// IPR003008 // Tubulin/FtsZ, GTPase // 2.1E-112 /// IPR008280 // Tubulin/FtsZ, C-terminal // 2.2E-82
6961	148160_at	0.525912	1.74191	8.87223	4.53e-10	8.84e-09	12.5336	FBgn0035517	CG1265	CG1265	CG1265	38517	---	---	---	IPR006603 // Cystinosin/ERS1p repeat // 1.3E-18
2234	143433_at	0.525724	5.30612	5.68986	2.83e-06	2.51e-05	3.72213	FBgn0004172	CG17946	Mst84Da	Male-specific RNA 84Da	40889	5506 // iron ion binding // inferred from electronic annotation	6118 // electron transport // inferred from electronic annotation	---	IPR005634 // Male specific sperm protein // 7.1E-12
2408	143607_at	0.525562	-0.148197	3.81231	0.000603508	0.00282365	-1.57989	FBgn0010385	CG1385	Def	Defensin	36047	---	6961 // antibacterial humoral response (sensu Protostomia) // inferred from expression pattern /// 6961 // antibacterial humoral response (sensu Protostomia) // inferred from sequence or structural similarity /// 6965 // anti-Gram-positive bacterial polypeptide induction // non-traceable author statement /// 42742 // defense response to bacteria // non-traceable author statement /// 42742 // defe…	---	IPR001542 // Arthropod defensin // 3.7E-23
12929	154128_at	0.525076	2.24358	10.4885	8.55e-12	2.4e-10	16.5597	FBgn0012051	CG7563	CalpA	Calpain-A	37232	4198 // calpain activity // non-traceable author statement /// 5509 // calcium ion binding // inferred from electronic annotation /// 5516 // calmodulin binding // inferred from electronic annotation /// 5515 // protein binding // inferred from physical interaction /// 4198 // calpain activity // inferred from direct assay /// 4197 // cysteine-type endopeptidase activity // inferred from electron…	6508 // proteolysis // inferred from electronic annotation /// 16540 // protein autoprocessing // traceable author statement /// 19538 // protein metabolism // inferred from electronic annotation /// 30036 // actin cytoskeleton organization and biogenesis // non-traceable author statement /// 6508 // proteolysis // inferred from direct assay	5737 // cytoplasm // non-traceable author statement /// 5622 // intracellular // inferred from direct assay /// 15629 // actin cytoskeleton // inferred from direct assay /// 43025 // cell soma // inferred from direct assay /// 5622 // intracellular // inferred from electronic annotation	IPR001300 // Peptidase C2, calpain // 1.0E-126 /// IPR002048 // Calcium-binding EF-hand // 9.9E-6 /// IPR002048 // Calcium-binding EF-hand // 0.0069 /// IPR001300 // Peptidase C2, calpain // 7.3E-107
12027	153226_at	0.524674	2.07743	4.6244	6.11e-05	0.000390788	0.666911	FBgn0046812	CG7439	AGO2	Argonaute 2	39683	3743 // translation initiation factor activity // inferred from sequence or structural similarity /// 5515 // protein binding // inferred from physical interaction /// 3723 // RNA binding // inferred from electronic annotation /// 3743 // translation initiation factor activity // inferred from sequence similarity	6413 // translational initiation // inferred from sequence or structural similarity /// 16246 // RNA interference // inferred from mutant phenotype /// 16246 // RNA interference // non-traceable author statement /// 16246 // RNA interference // traceable author statement /// 30422 // RNA interference, production of siRNA // inferred from direct assay /// 30423 // RNA interference, targeting of mR…	16442 // RNA-induced silencing complex // inferred from direct assay /// 16442 // RNA-induced silencing complex // traceable author statement	IPR003100 // Argonaute and Dicer protein, PAZ // 4.6E-50 /// IPR003165 // Stem cell self-renewal protein Piwi // 3.8E-89 /// IPR003100 // Argonaute and Dicer protein, PAZ // 4.6E-50 /// IPR003165 // Stem cell self-renewal protein Piwi // 3.8E-89
1338	142537_at	0.524012	3.31213	6.84886	1.04e-07	1.25e-06	7.03633	FBgn0063494	CG17530	GstE6	Glutathione S transferase E6	37111	4364 // glutathione transferase activity // inferred from sequence or structural similarity /// 4364 // glutathione transferase activity // inferred from sequence similarity	6800 // oxygen and reactive oxygen species metabolism // inferred from electronic annotation /// 6952 // defense response // inferred from electronic annotation /// 9636 // response to toxin // inferred from electronic annotation	---	IPR004046 // Glutathione S-transferase, C-terminal // 1.4E-11 /// IPR004045 // Glutathione S-transferase, N-terminal // 4.7E-18
7440	148639_at	0.523667	4.5425	7.4792	1.82e-08	2.55e-07	8.79754	FBgn0036262	CG6910	CG6910	CG6910	39391	16491 // oxidoreductase activity // inferred from electronic annotation	5975 // carbohydrate metabolism // inferred from electronic annotation /// 6139 // nucleobase, nucleoside, nucleotide and nucleic acid metabolism // inferred from electronic annotation	---	IPR007828 // Protein of unknown function DUF706 // 1.0E-126
8729	149928_at	0.523468	3.03918	9.8919	3.56e-11	8.67e-10	15.1134	FBgn0038281	CG3843	RpL10Aa	Ribosomal protein L10Aa	41811	3676 // nucleic acid binding // inferred from electronic annotation /// 3735 // structural constituent of ribosome // inferred from sequence or structural similarity /// 3735 // structural constituent of ribosome // inferred from electronic annotation /// 3735 // structural constituent of ribosome // inferred from sequence similarity	6412 // protein biosynthesis // inferred from sequence or structural similarity /// 6412 // protein biosynthesis // inferred from electronic annotation /// 6412 // protein biosynthesis // inferred from sequence similarity	5842 // cytosolic large ribosomal subunit (sensu Eukaryota) // inferred from sequence or structural similarity /// 5622 // intracellular // inferred from electronic annotation /// 5840 // ribosome // inferred from electronic annotation /// 5842 // cytosolic large ribosomal subunit (sensu Eukaryota) // inferred from sequence similarity	IPR002143 // Ribosomal protein L1 // 3.5E-50
1059	142258_at	0.522917	1.60516	5.91416	1.48e-06	1.39e-05	4.36811	FBgn0035476	CG12766	CG12766	CG12766	38462	4032 // aldehyde reductase activity // inferred from sequence or structural similarity /// 4032 // aldehyde reductase activity // inferred from sequence similarity	---	---	IPR001395 // Aldo/keto reductase // 1.0E-126
13940	155139_at	0.522655	4.11606	2.03126	0.0507518	0.104564	-5.73332	FBgn0036837	CG18135	CG18135	CG18135	40073	5515 // protein binding // inferred from physical interaction /// 3824 // catalytic activity // inferred from electronic annotation /// 4629 // phospholipase C activity // inferred from electronic annotation /// 8889 // glycerophosphodiester phosphodiesterase activity // inferred from electronic annotation	5975 // carbohydrate metabolism // inferred from electronic annotation /// 6071 // glycerol metabolism // inferred from electronic annotation /// 7165 // signal transduction // inferred from electronic annotation /// 7242 // intracellular signaling cascade // inferred from electronic annotation	---	IPR004129 // Glycerophosphoryl diester phosphodiesterase // 1.4E-56 /// IPR004129 // Glycerophosphoryl diester phosphodiesterase // 1.4E-56 /// IPR004129 // Glycerophosphoryl diester phosphodiesterase // 1.4E-56 /// IPR004129 // Glycerophosphoryl diester phosphodiesterase // 1.4E-56
2202	143401_at	0.522598	2.62291	3.12525	0.00380457	0.0130005	-3.35077	FBgn0003961	CG7171	Uro	Urate oxidase	34060	4846 // urate oxidase activity // inferred from sequence or structural similarity /// 4846 // urate oxidase activity // non-traceable author statement /// 4846 // urate oxidase activity // inferred from sequence similarity	6144 // purine base metabolism // inferred from electronic annotation /// 19428 // allantoin biosynthesis // traceable author statement	5777 // peroxisome // non-traceable author statement	IPR002042 // Uricase // 4.2E-68 /// IPR002042 // Uricase // 4.0E-70
12624	153823_at	0.522566	3.00642	7.50699	1.69e-08	2.37e-07	8.87428	FBgn0033377	CG8073	Pmm45A	Phosphomannomutase 45A	35923	4615 // phosphomannomutase activity // inferred from sequence or structural similarity /// 4615 // phosphomannomutase activity // non-traceable author statement /// 16868 // intramolecular transferase activity, phosphotransferases // inferred from electronic annotation /// 4615 // phosphomannomutase activity // inferred from sequence similarity	5996 // monosaccharide metabolism // inferred from electronic annotation /// 5975 // carbohydrate metabolism // inferred from electronic annotation	---	IPR005844 // Phosphoglucomutase/phosphomannomutase alpha/beta/alpha domain I // 2.6E-48 /// IPR005844 // Phosphoglucomutase/phosphomannomutase alpha/beta/alpha domain I // 2.6E-48
10974	152173_at	0.52255	3.44918	7.84603	6.73e-09	1.03e-07	9.80365	FBgn0010406 /// FBgn0045558	CG8194	RNaseX25 /// DsimRNaseX25	Ribonuclease X25 /// RNaseX25	38885	3676 // nucleic acid binding // inferred from electronic annotation /// 3729 // mRNA binding // inferred from electronic annotation /// 4521 // endoribonuclease activity // inferred from sequence or structural similarity /// 4540 // ribonuclease activity // inferred from sequence or structural similarity /// 3723 // RNA binding // inferred from electronic annotation /// 4521 // endoribonuclease a…	6401 // RNA catabolism // inferred from electronic annotation /// 6401 // RNA catabolism // inferred from sequence or structural similarity /// 6401 // RNA catabolism // inferred from sequence similarity	---	IPR001568 // Ribonuclease T2 // 7.2E-68
11879	153078_at	0.521519	2.78236	6.09978	8.72e-07	8.69e-06	4.9017	FBgn0011270	CG17645	Pglym87	Pglym87	46246	4619 // phosphoglycerate mutase activity // inferred from sequence or structural similarity /// 3824 // catalytic activity // inferred from electronic annotation /// 16868 // intramolecular transferase activity, phosphotransferases // inferred from electronic annotation /// 4619 // phosphoglycerate mutase activity // inferred from sequence similarity	6096 // glycolysis // inferred from electronic annotation /// 8152 // metabolism // inferred from electronic annotation	---	IPR001345 // Phosphoglycerate/bisphosphoglycerate mutase // 1.4E-113 /// IPR001345 // Phosphoglycerate/bisphosphoglycerate mutase // 1.4E-113
10930	152129_at	0.521229	3.01378	9.13184	2.34e-10	4.8e-09	13.2033	FBgn0027569	CG7207	CG7207	CG7207	38928	4674 // protein serine/threonine kinase activity // inferred from sequence or structural similarity /// 4702 // receptor signaling protein serine/threonine kinase activity // inferred from electronic annotation /// 5515 // protein binding // inferred from physical interaction /// 4674 // protein serine/threonine kinase activity // inferred from sequence similarity	6468 // protein amino acid phosphorylation // inferred from electronic annotation	---	IPR001849 // Pleckstrin-like // 1.6E-21 /// IPR002913 // Lipid-binding START // 1.5E-13
1905	143104_at	0.521162	3.44424	9.64586	6.49e-11	1.48e-09	14.5033	FBgn0000339	CG5855	cni	cornichon	34967	5102 // receptor binding // inferred from electronic annotation /// 5515 // protein binding // non-traceable author statement	6810 // transport // non-traceable author statement /// 6888 // ER to Golgi vesicle-mediated transport // inferred from mutant phenotype /// 7242 // intracellular signaling cascade // inferred from electronic annotation /// 7310 // oocyte dorsal/ventral axis determination // non-traceable author statement /// 7314 // oocyte anterior/posterior axis determination // non-traceable author statement /…	5887 // integral to plasma membrane // non-traceable author statement /// 16020 // membrane // inferred from electronic annotation /// 16021 // integral to membrane // inferred from electronic annotation	IPR003377 // Cornichon // 7.2E-81
8523	149722_at	0.520948	2.26806	5.26967	9.52e-06	7.4e-05	2.51154	FBgn0037973	CG18547	CG18547	CG18547	41452	16491 // oxidoreductase activity // inferred from electronic annotation	---	---	IPR001395 // Aldo/keto reductase // 1.1E-29
11339	152538_at	0.520641	4.6288	6.60497	2.07e-07	2.35e-06	6.34547	FBgn0017539	CG17246	Scs-fp	Succinyl coenzyme A synthetase flavoprotein subunit	37228	4776 // succinate-CoA ligase (GDP-forming) activity // non-traceable author statement /// 8177 // succinate dehydrogenase (ubiquinone) activity // inferred from sequence or structural similarity /// 8177 // succinate dehydrogenase (ubiquinone) activity // non-traceable author statement /// 15036 // disulfide oxidoreductase activity // inferred from electronic annotation /// 8177 // succinate dehy…	6099 // tricarboxylic acid cycle // inferred from sequence or structural similarity /// 6099 // tricarboxylic acid cycle // non-traceable author statement /// 6118 // electron transport // inferred from electronic annotation /// 6119 // oxidative phosphorylation // inferred from electronic annotation /// 6099 // tricarboxylic acid cycle // inferred from electronic annotation /// 6810 // transport…	5749 // respiratory chain complex II (sensu Eukaryota) // inferred from sequence or structural similarity /// 5749 // respiratory chain complex II (sensu Eukaryota) // non-traceable author statement /// 5739 // mitochondrion // inferred from electronic annotation /// 5749 // respiratory chain complex II (sensu Eukaryota) // inferred from sequence similarity	IPR004112 // Fumarate reductase/succinate dehydrogenase flavoprotein, C-terminal // 5.9E-93 /// IPR003953 // Fumarate reductase/succinate dehydrogenase flavoprotein, N-terminal // 1.0E-126
66	141265_at	0.520314	1.65264	6.31125	4.77e-07	5.06e-06	5.50781	FBgn0040475	CG6757	SH3PX1	SH3PX1	39136	5515 // protein binding // inferred from physical interaction /// 5515 // protein binding // inferred from electronic annotation /// 35091 // phosphoinositide binding // inferred from electronic annotation	6886 // intracellular protein transport // inferred from sequence or structural similarity /// 7242 // intracellular signaling cascade // inferred from electronic annotation /// 6886 // intracellular protein transport // inferred from sequence similarity	---	IPR001452 // SH3 // 7.0E-17 /// IPR001683 // Phox-like // 3.9E-37
11665	152864_at	0.520229	3.18228	6.31158	4.76e-07	5.05e-06	5.50877	FBgn0039135	CG13603	CG13603	CG13603	42838	---	---	---	---
1840	143039_at	0.5199	1.48913	8.23755	2.37e-09	4.01e-08	10.8604	FBgn0028411	CG12752	Nxt1	NTF2-related export protein 1	37769	8565 // protein transporter activity // inferred from electronic annotation /// 5215 // transporter activity // inferred from electronic annotation	6406 // mRNA export from nucleus // non-traceable author statement /// 6408 // snRNA export from nucleus // non-traceable author statement /// 6409 // tRNA export from nucleus // non-traceable author statement /// 6606 // protein import into nucleus // inferred from electronic annotation /// 6611 // protein export from nucleus // non-traceable author statement /// 16973 // poly(A)+ mRNA export fr…	5634 // nucleus // non-traceable author statement /// 5635 // nuclear envelope // inferred from direct assay /// 5654 // nucleoplasm // inferred from direct assay /// 5737 // cytoplasm // inferred from direct assay /// 5622 // intracellular // inferred from electronic annotation /// 5634 // nucleus // inferred from electronic annotation	IPR002075 // Nuclear transport factor 2 (NTF2) // 3.0E-36
12802	154001_at	0.519722	1.62831	5.90011	1.55e-06	1.44e-05	4.3277	FBgn0030607	CG5560	CG5560	CG5560	32436	---	6629 // lipid metabolism // inferred from electronic annotation	---	IPR002641 // Patatin // 2.4E-41
13963	155162_at	0.519137	3.01225	4.76253	4.11e-05	0.000273117	1.05902	FBgn0010551	CG15081	l(2)03709	lethal (2) 03709	46038	---	74 // regulation of progression through cell cycle // inferred from electronic annotation /// 6139 // nucleobase, nucleoside, nucleotide and nucleic acid metabolism // inferred from electronic annotation /// 6259 // DNA metabolism // inferred from electronic annotation /// 6260 // DNA replication // inferred from electronic annotation /// 7049 // cell cycle // inferred from electronic annotation …	---	IPR001107 // Band 7 protein // 1.2E-63
10049	151248_at	0.518536	3.67589	4.16324	0.000226654	0.00121152	-0.623943	FBgn0040775	CG12158	CG12158	CG12158	2768730	---	---	---	---
1115	142314_at	0.518178	4.73761	6.00675	1.14e-06	1.11e-05	4.63443	FBgn0035871	CG7188	CG7188	CG7188	38936	5515 // protein binding // inferred from physical interaction	6916 // anti-apoptosis // inferred from electronic annotation /// 43066 // negative regulation of apoptosis // inferred from sequence or structural similarity /// 6915 // apoptosis // inferred from electronic annotation /// 43066 // negative regulation of apoptosis // inferred from electronic annotation /// 43066 // negative regulation of apoptosis // inferred from sequence similarity	16021 // integral to membrane // inferred from electronic annotation /// 16020 // membrane // inferred from electronic annotation	---
12618	153817_at	0.517398	3.81957	9.12515	2.38e-10	4.87e-09	13.1861	FBgn0003514	CG3595	sqh	spaghetti squash	31554	5509 // calcium ion binding // non-traceable author statement /// 5516 // calmodulin binding // inferred from electronic annotation /// 42623 // ATPase activity, coupled // inferred from sequence or structural similarity /// 5509 // calcium ion binding // inferred from electronic annotation /// 42623 // ATPase activity, coupled // inferred from sequence similarity	910 // cytokinesis // inferred from mutant phenotype /// 910 // cytokinesis // non-traceable author statement /// 910 // cytokinesis // traceable author statement /// 1736 // establishment of planar polarity // non-traceable author statement /// 6936 // muscle contraction // inferred from electronic annotation /// 7298 // border follicle cell migration (sensu Insecta) // inferred from mutant phen…	16461 // unconventional myosin // inferred from sequence or structural similarity /// 16461 // unconventional myosin // non-traceable author statement /// 16461 // unconventional myosin // inferred from sequence similarity	IPR002048 // Calcium-binding EF-hand // 1.1E-7
13694	154893_at	0.517191	2.3346	6.89868	9.07e-08	1.11e-06	7.17688	FBgn0004176	CG3157	Tub23C	Tubulin at 23C	33501	3924 // GTPase activity // inferred from electronic annotation /// 5200 // structural constituent of cytoskeleton // inferred from sequence or structural similarity /// 5525 // GTP binding // inferred from direct assay /// 5525 // GTP binding // inferred from electronic annotation /// 15631 // tubulin binding // inferred from electronic annotation /// 19001 // guanyl nucleotide binding // inferre…	6886 // intracellular protein transport // inferred from electronic annotation /// 6928 // cell motility // inferred from electronic annotation /// 7017 // microtubule-based process // inferred from sequence or structural similarity /// 7017 // microtubule-based process // non-traceable author statement /// 7018 // microtubule-based movement // inferred from electronic annotation /// 7059 // chro…	5815 // microtubule organizing center // inferred from sequence or structural similarity /// 5815 // microtubule organizing center // non-traceable author statement /// 5874 // microtubule // inferred from sequence or structural similarity /// 8275 // gamma-tubulin small complex // inferred from physical interaction /// 8275 // gamma-tubulin small complex // inferred from sequence or structural s…	IPR003008 // Tubulin/FtsZ, GTPase // 4.7E-100 /// IPR008280 // Tubulin/FtsZ, C-terminal // 1.6E-54
9135	150334_at	0.516809	2.01768	4.17407	0.000219838	0.00118096	-0.594018	FBgn0064912	CG31178	CG31178	CG31178	42575	---	---	---	---
10463	151662_s_at	0.516701	1.84748	6.17729	6.99e-07	7.12e-06	5.12411	FBgn0001978	CG3647	stc	shuttle craft	34888	3697 // single-stranded DNA binding // non-traceable author statement /// 3700 // transcription factor activity // inferred from electronic annotation /// 3702 // RNA polymerase II transcription factor activity // inferred from sequence or structural similarity /// 3735 // structural constituent of ribosome // inferred from electronic annotation /// 4842 // ubiquitin-protein ligase activity // in…	6118 // electron transport // inferred from electronic annotation /// 6357 // regulation of transcription from RNA polymerase II promoter // inferred from electronic annotation /// 6412 // protein biosynthesis // inferred from electronic annotation /// 7399 // nervous system development // non-traceable author statement /// 16567 // protein ubiquitination // inferred from electronic annotation //…	151 // ubiquitin ligase complex // inferred from electronic annotation /// 5634 // nucleus // inferred from sequence or structural similarity /// 5634 // nucleus // non-traceable author statement /// 5840 // ribosome // inferred from electronic annotation /// 5634 // nucleus // inferred from electronic annotation /// 5634 // nucleus // inferred from sequence similarity	IPR000967 // Zn-finger, NF-X1 type // 1.6E-8 /// IPR000967 // Zn-finger, NF-X1 type // 5.2E-9 /// IPR000967 // Zn-finger, NF-X1 type // 3.5E-9 /// IPR000967 // Zn-finger, NF-X1 type // 1.4E-8 /// IPR000967 // Zn-finger, NF-X1 type // 1.2E-7 /// IPR000967 // Zn-finger, NF-X1 type // 6.4E-12 /// IPR000967 // Zn-finger, NF-X1 type // 1.6E-9 /// IPR000967 // Zn-finger, NF-X1 type // 2.2E-9 /// IPR001…
12034	153233_at	0.516332	4.2987	4.73008	4.51e-05	0.000296158	0.966711	FBgn0033875	CG6357	CG6357	CG6357	36532	4217 // cathepsin L activity // inferred from sequence or structural similarity /// 4217 // cathepsin L activity // inferred from sequence similarity	---	---	---
12564	153763_at	0.515453	2.04817	6.40626	3.64e-07	3.96e-06	5.77935	FBgn0035807	CG7492	CG7492	CG7492	38859	5515 // protein binding // inferred from physical interaction	---	---	---
3406	144605_at	0.514401	0.548375	7.79833	7.65e-09	1.15e-07	9.67367	FBgn0029885	CG3224	CG3224	CG3224	31600	5515 // protein binding // inferred from physical interaction /// 3676 // nucleic acid binding // inferred from electronic annotation /// 8270 // zinc ion binding // inferred from electronic annotation /// 46872 // metal ion binding // inferred from electronic annotation	---	5634 // nucleus // inferred from electronic annotation	---
10921	152120_at	0.51382	4.46055	8.13968	3.07e-09	5.03e-08	10.598	FBgn0038194	CG3050	Cyp6d5	Cyp6d5	41706	4497 // monooxygenase activity // inferred from electronic annotation /// 16491 // oxidoreductase activity // inferred from electronic annotation /// 5506 // iron ion binding // inferred from electronic annotation /// 5515 // protein binding // inferred from physical interaction /// 20037 // heme binding // inferred from electronic annotation /// 46872 // metal ion binding // inferred from electr…	6118 // electron transport // inferred from electronic annotation /// 8202 // steroid metabolism // inferred from electronic annotation	5792 // microsome // non-traceable author statement /// 16020 // membrane // non-traceable author statement /// 5783 // endoplasmic reticulum // inferred from electronic annotation /// 5792 // microsome // inferred from electronic annotation /// 16020 // membrane // inferred from electronic annotation	IPR001128 // Cytochrome P450 // 2.8E-88 /// IPR001128 // Cytochrome P450 // 8.7E-32
12485	153684_at	0.512552	2.86762	6.45593	3.16e-07	3.48e-06	5.9211	FBgn0000250	CG5848	cact	cactus	34969	5515 // protein binding // inferred from physical interaction /// 8134 // transcription factor binding // traceable author statement /// 30528 // transcription regulator activity // inferred from electronic annotation	6357 // regulation of transcription from RNA polymerase II promoter // inferred from electronic annotation /// 6916 // anti-apoptosis // inferred from electronic annotation /// 6952 // defense response // non-traceable author statement /// 6952 // defense response // traceable author statement /// 6955 // immune response // traceable author statement /// 6960 // antimicrobial humoral response (se…	5737 // cytoplasm // inferred from direct assay /// 5737 // cytoplasm // non-traceable author statement /// 5737 // cytoplasm // traceable author statement	IPR002110 // Ankyrin // 2.2E-9 /// IPR002110 // Ankyrin // 1.3E-6 /// IPR002110 // Ankyrin // 6.3E-4 /// IPR002110 // Ankyrin // 3.6E-8 /// IPR002110 // Ankyrin // 2.6E-5
9195	150394_at	0.511558	1.58628	7.38442	2.36e-08	3.25e-07	8.53522	FBgn0039008	CG6972	CG6972	CG6972	42684	---	---	---	---
4815	146014_at	0.511351	0.882697	3.98028	0.000378617	0.00190055	-1.12576	FBgn0032002	CG8353	CG8353	CG8353	34123	4126 // cytidine deaminase activity // inferred from sequence or structural similarity /// 8270 // zinc ion binding // inferred from electronic annotation /// 4126 // cytidine deaminase activity // inferred from electronic annotation /// 16787 // hydrolase activity // inferred from electronic annotation /// 4126 // cytidine deaminase activity // inferred from sequence similarity	6206 // pyrimidine base metabolism // inferred from electronic annotation /// 46087 // cytidine metabolism // inferred from electronic annotation	---	IPR002125 // Cytidine/deoxycytidylate deaminase, zinc-binding region // 1.4E-22
7564	148763_at	0.510816	2.65548	8.95948	3.63e-10	7.21e-09	12.7596	FBgn0036441	CG13476	CG13476	CG13476	39602	---	---	---	---
12402	153601_at	0.509084	1.91396	10.224	1.6e-11	4.23e-10	15.9242	FBgn0003062	CG9888	Fib	Fibrillarin	37662	3729 // mRNA binding // inferred from electronic annotation /// 3729 // mRNA binding // inferred from sequence or structural similarity /// 5515 // protein binding // inferred from physical interaction /// 3723 // RNA binding // inferred from sequence or structural similarity /// 3723 // RNA binding // inferred from electronic annotation /// 3729 // mRNA binding // inferred from sequence similari…	6365 // 35S primary transcript processing // inferred from sequence or structural similarity /// 6396 // RNA processing // inferred from sequence or structural similarity /// 16072 // rRNA metabolism // inferred from electronic annotation /// 6364 // rRNA processing // inferred from electronic annotation /// 6365 // 35S primary transcript processing // inferred from sequence similarity /// 6396 /…	1651 // dense fibrillar component // inferred from sequence or structural similarity /// 5732 // small nucleolar ribonucleoprotein complex // inferred from sequence or structural similarity /// 30532 // small nuclear ribonucleoprotein complex // inferred from sequence or structural similarity /// 5634 // nucleus // inferred from electronic annotation /// 30529 // ribonucleoprotein complex // infe…	IPR000692 // Fibrillarin // 1.0E-126
11742	152941_at	0.509038	2.43511	10.1184	2.06e-11	5.23e-10	15.668	FBgn0019972	CG7788	Ice	Ice	43514	30693 // caspase activity // inferred from sequence or structural similarity /// 30693 // caspase activity // non-traceable author statement /// 30693 // caspase activity // traceable author statement /// 5515 // protein binding // inferred from physical interaction /// 8233 // peptidase activity // inferred from electronic annotation /// 8234 // cysteine-type peptidase activity // inferred from …	6508 // proteolysis // inferred from electronic annotation /// 6508 // proteolysis // traceable author statement /// 6915 // apoptosis // non-traceable author statement /// 6915 // apoptosis // traceable author statement /// 46668 // regulation of retinal programmed cell death // non-traceable author statement /// 6915 // apoptosis // inferred from electronic annotation	8303 // caspase complex // non-traceable author statement	IPR001309 // Caspase-1, p20 // 2.7E-110
9834	151033_r_at	0.508804	1.58011	7.28482	3.1e-08	4.19e-07	8.25855	---	---	---	---	---	---	---	---	---
6097	147296_at	0.508303	2.01656	8.55451	1.03e-09	1.88e-08	11.7023	FBgn0034104	CG15705	CG15705	CG15705	36815	5515 // protein binding // inferred from physical interaction	---	---	---
10493	151692_i_at	0.507965	1.99214	7.79135	7.79e-09	1.17e-07	9.65463	FBgn0051301	CG31301	CG31301	CG31301	41865	3676 // nucleic acid binding // inferred from electronic annotation /// 3725 // double-stranded RNA binding // inferred from electronic annotation	---	5622 // intracellular // inferred from electronic annotation	IPR000467 // D111/G-patch domain // 1.4E-9 /// IPR001374 // Single-stranded nucleic acid binding R3H // 2.1E-16
11959	153158_at	0.50792	3.2381	8.06648	3.73e-09	6.01e-08	10.4009	FBgn0000318 /// FBgn0067992	CG11024	cl /// Dyakcl	clot /// cl	43938	30508 // thiol-disulfide exchange intermediate activity // non-traceable author statement /// 5515 // protein binding // inferred from physical interaction	6118 // electron transport // inferred from electronic annotation	---	IPR010357 // Eukaryotic protein of unknown function DUF953 // 3.6E-83
11581	152780_at	0.507556	1.41251	3.97519	0.00038404	0.00192348	-1.13964	FBgn0035251	CG7967	CG7967	CG7967	38204	5515 // protein binding // inferred from physical interaction	---	---	IPR006745 // Protein of unknown function DUF605 // 1.0E-126
1898	143097_f_at	0.506532	1.57254	2.72152	0.0104998	0.0297839	-4.30535	FBgn0000277	CG1367	CecA2	Cecropin A2	43597	---	6961 // antibacterial humoral response (sensu Protostomia) // inferred from expression pattern /// 6961 // antibacterial humoral response (sensu Protostomia) // inferred from sequence or structural similarity /// 6961 // antibacterial humoral response (sensu Protostomia) // non-traceable author statement /// 42742 // defense response to bacteria // non-traceable author statement /// 50829 // defe…	5576 // extracellular region // inferred from electronic annotation	IPR000875 // Cecropin // 4.9E-21
12101	153300_at	0.506495	1.58014	7.77872	8.06e-09	1.21e-07	9.62017	FBgn0030048	CG12112	CG12112	CG12112	31794	---	---	---	---
12750	153949_at	0.506384	2.95743	5.92003	1.46e-06	1.37e-05	4.38501	FBgn0032870	CG2608	CG2608	CG2608	35323	3676 // nucleic acid binding // inferred from electronic annotation	---	---	IPR001374 // Single-stranded nucleic acid binding R3H // 4.6E-15
5740	146939_at	0.505495	3.24721	3.51358	0.00136366	0.0055842	-2.36892	FBgn0033511	CG12907	CG12907	CG12907	36091	5515 // protein binding // inferred from physical interaction	---	---	---
13067	154266_at	0.505285	2.03901	8.1226	3.21e-09	5.23e-08	10.552	FBgn0037555	CG9638	Ada2b	Ada2b	40966	3677 // DNA binding // inferred from electronic annotation /// 4402 // histone acetyltransferase activity // non-traceable author statement /// 8270 // zinc ion binding // inferred from electronic annotation /// 19239 // deaminase activity // inferred from electronic annotation /// 30528 // transcription regulator activity // inferred from electronic annotation /// 5515 // protein binding // infe…	6357 // regulation of transcription from RNA polymerase II promoter // inferred from electronic annotation /// 35066 // positive regulation of histone acetylation // inferred from mutant phenotype /// 45449 // regulation of transcription // inferred from electronic annotation	124 // SAGA complex // inferred from physical interaction /// 124 // SAGA complex // non-traceable author statement /// 5700 // polytene chromosome // inferred from direct assay /// 5634 // nucleus // inferred from electronic annotation	IPR000433 // Zn-finger, ZZ type // 2.2E-8 /// IPR001005 // Myb DNA-binding domain // 1.6E-8
7340	148539_at	0.503938	2.12471	6.14202	7.73e-07	7.8e-06	5.02294	FBgn0036110	CG18348	CG18348	CG18348	39225	42302 // structural constituent of cuticle // inferred from electronic annotation	---	---	IPR000618 // Insect cuticle protein // 9.6E-28
10889	152088_at	0.503703	3.52239	4.14329	0.000239753	0.0012728	-0.678985	FBgn0027579	CG5508	CG5508	CG5508	43350	4366 // glycerol-3-phosphate O-acyltransferase activity // inferred from sequence or structural similarity /// 5515 // protein binding // inferred from physical interaction /// 4366 // glycerol-3-phosphate O-acyltransferase activity // inferred from electronic annotation /// 8415 // acyltransferase activity // inferred from electronic annotation /// 4366 // glycerol-3-phosphate O-acyltransferase …	7009 // plasma membrane organization and biogenesis // inferred from sequence or structural similarity /// 8654 // phospholipid biosynthesis // inferred from sequence or structural similarity /// 8152 // metabolism // inferred from electronic annotation /// 8654 // phospholipid biosynthesis // inferred from electronic annotation /// 44255 // cellular lipid metabolism // inferred from electronic a…	5741 // mitochondrial outer membrane // inferred from sequence or structural similarity /// 16020 // membrane // inferred from electronic annotation /// 5741 // mitochondrial outer membrane // inferred from sequence similarity	IPR002123 // Phospholipid/glycerol acyltransferase // 2.1E-20 /// IPR002123 // Phospholipid/glycerol acyltransferase // 2.1E-20 /// IPR002123 // Phospholipid/glycerol acyltransferase // 2.1E-20
12310	153509_at	0.502076	2.55652	5.56084	4.11e-06	3.48e-05	3.35028	FBgn0015587	---	p120ctn	Adherens junction protein p120	---	5488 // binding // inferred from electronic annotation	7155 // cell adhesion // inferred from genetic interaction /// 7165 // signal transduction // inferred from electronic annotation	5737 // cytoplasm // inferred from direct assay /// 5813 // centrosome // inferred from direct assay /// 5912 // adherens junction // inferred from direct assay /// 5912 // adherens junction // inferred from physical interaction /// 5912 // adherens junction // inferred from sequence similarity	IPR000225 // Armadillo // 1.4E-12 /// IPR000225 // Armadillo // 1.3E-8 /// IPR000225 // Armadillo // 1.4E-7
3261	144460_at	0.50174	0.587534	6.81009	1.16e-07	1.38e-06	6.92683	FBgn0029689	CG6428	CG6428	CG6428	31351	4067 // asparaginase activity // inferred from electronic annotation /// 4622 // lysophospholipase activity // inferred from sequence or structural similarity /// 5515 // protein binding // inferred from physical interaction /// 4622 // lysophospholipase activity // inferred from sequence similarity	9063 // amino acid catabolism // inferred from electronic annotation /// 6520 // amino acid metabolism // inferred from electronic annotation	---	IPR006034 // Asparaginase/glutaminase // 1.2E-53 /// IPR002110 // Ankyrin // 3.8E-11 /// IPR002110 // Ankyrin // 2.1E-4 /// IPR002110 // Ankyrin // 2.7E-5 /// IPR002110 // Ankyrin // 24.0
1045	142244_at	0.500874	1.42967	8.23931	2.35e-09	4e-08	10.8651	FBgn0032512	CG9305	CG9305	CG9305	34748	3700 // transcription factor activity // inferred from sequence or structural similarity /// 3677 // DNA binding // inferred from electronic annotation /// 3700 // transcription factor activity // inferred from sequence similarity	45449 // regulation of transcription // inferred from electronic annotation	5634 // nucleus // inferred from sequence or structural similarity /// 5634 // nucleus // inferred from electronic annotation /// 5634 // nucleus // inferred from sequence similarity	IPR001005 // Myb DNA-binding domain // 2.7E-8
11727	152926_at	0.500761	5.84378	6.68238	1.67e-07	1.93e-06	6.56524	FBgn0040992	CG10570	CG10570	CG10570	50466	5515 // protein binding // inferred from physical interaction	---	---	---
10922	152121_s_at	0.500733	3.23849	10.2469	1.51e-11	4.03e-10	15.9795	FBgn0027572	CG5009	CG5009	CG5009	37028	16401 // palmitoyl-CoA oxidase activity // inferred from sequence or structural similarity /// 5515 // protein binding // inferred from physical interaction /// 3995 // acyl-CoA dehydrogenase activity // inferred from electronic annotation /// 3997 // acyl-CoA oxidase activity // inferred from electronic annotation /// 50660 // FAD binding // inferred from electronic annotation /// 16401 // palmi…	6635 // fatty acid beta-oxidation // inferred from electronic annotation /// 6118 // electron transport // inferred from electronic annotation /// 6631 // fatty acid metabolism // inferred from electronic annotation	5777 // peroxisome // inferred from electronic annotation	IPR002655 // Acyl-CoA oxidase // 1.9E-34
393	141592_at	0.499901	3.43461	3.0639	0.00445571	0.0147995	-3.50058	FBgn0001297	CG33956	kay	kayak	3772082	3677 // DNA binding // inferred from direct assay /// 3700 // transcription factor activity // traceable author statement /// 3702 // RNA polymerase II transcription factor activity // inferred from direct assay /// 3704 // specific RNA polymerase II transcription factor activity // non-traceable author statement /// 5515 // protein binding // inferred from physical interaction /// 8134 // transc…	1736 // establishment of planar polarity // non-traceable author statement /// 6355 // regulation of transcription, DNA-dependent // inferred from electronic annotation /// 7254 // JNK cascade // non-traceable author statement /// 7297 // follicle cell migration (sensu Insecta) // inferred from mutant phenotype /// 7391 // dorsal closure // non-traceable author statement /// 7391 // dorsal closur…	5634 // nucleus // inferred from direct assay /// 5634 // nucleus // non-traceable author statement /// 5737 // cytoplasm // inferred from direct assay /// 5634 // nucleus // inferred from electronic annotation	IPR004827 // Basic-leucine zipper (bZIP) transcription factor // 2.5E-10
2830	144029_at	0.499231	1.0064	8.97465	3.49e-10	6.98e-09	12.7988	FBgn0024912	CG1303	agt	O-6-alkylguanine-DNA alkyltransferase	40816	3676 // nucleic acid binding // inferred from electronic annotation /// 3908 // methylated-DNA-[protein]-cysteine S-methyltransferase activity // inferred from direct assay /// 3908 // methylated-DNA-[protein]-cysteine S-methyltransferase activity // inferred from sequence or structural similarity /// 3908 // methylated-DNA-[protein]-cysteine S-methyltransferase activity // non-traceable author s…	6259 // DNA metabolism // inferred from electronic annotation /// 6281 // DNA repair // inferred from electronic annotation /// 6307 // DNA dealkylation // inferred from direct assay	---	IPR001497 // Methylated-DNA-[protein]-cysteine S-methyltransferase // 2.2E-31
6309	147508_at	0.499203	2.1955	8.51076	1.15e-09	2.08e-08	11.5869	FBgn0034461	CG15124	CG15124	CG15124	37256	5515 // protein binding // inferred from physical interaction	---	---	---
12892	154091_at	0.498005	3.66565	8.27051	2.17e-09	3.71e-08	10.9486	FBgn0031836	CG11050	CG11050	CG11050	33924	---	---	---	IPR006674 // Metal-dependent phosphohydrolase, HD subdomain // 1.2E-9
9101	150300_at	0.497176	2.71416	5.27469	9.38e-06	7.3e-05	2.52599	FBgn0038863	CG5802	CG5802	CG5802	42510	5459 // UDP-galactose transporter activity // inferred from sequence or structural similarity /// 5459 // UDP-galactose transporter activity // inferred from sequence similarity	5975 // carbohydrate metabolism // inferred from electronic annotation /// 8643 // carbohydrate transport // inferred from electronic annotation	---	---
11602	152801_at	0.496725	4.52015	3.93223	0.00043286	0.00212636	-1.25637	FBgn0001125	CG4233	Got2	Glutamate oxaloacetate transaminase 2	33373	4069 // aspartate transaminase activity // inferred from direct assay /// 4069 // aspartate transaminase activity // inferred from sequence or structural similarity /// 4069 // aspartate transaminase activity // non-traceable author statement /// 3824 // catalytic activity // inferred from electronic annotation /// 8483 // transaminase activity // inferred from electronic annotation /// 16769 // …	6531 // aspartate metabolism // inferred from sequence or structural similarity /// 6537 // glutamate biosynthesis // inferred from mutant phenotype /// 6537 // glutamate biosynthesis // traceable author statement /// 7416 // synaptogenesis // inferred from mutant phenotype /// 45213 // neurotransmitter receptor metabolism // inferred from mutant phenotype /// 6520 // amino acid metabolism // inf…	5739 // mitochondrion // inferred from sequence or structural similarity /// 5759 // mitochondrial matrix // inferred from sequence or structural similarity /// 5739 // mitochondrion // inferred from sequence similarity /// 5759 // mitochondrial matrix // inferred from sequence similarity	IPR004839 // Aminotransferase, class I and II // 2.4E-95 /// IPR004839 // Aminotransferase, class I and II // 2.4E-95
12019	153218_at	0.496211	2.34001	6.95546	7.74e-08	9.61e-07	7.3368	FBgn0034709	CG3074	CG3074	CG3074	37537	4213 // cathepsin B activity // inferred from sequence or structural similarity /// 5515 // protein binding // inferred from physical interaction /// 4197 // cysteine-type endopeptidase activity // inferred from electronic annotation /// 8234 // cysteine-type peptidase activity // inferred from electronic annotation /// 4213 // cathepsin B activity // inferred from sequence similarity	6508 // proteolysis // inferred from electronic annotation /// 19538 // protein metabolism // inferred from electronic annotation	---	IPR000668 // Peptidase C1A, papain // 4.3E-75
11792	152991_at	0.496203	2.32733	7.12473	4.83e-08	6.27e-07	7.81181	FBgn0026173	CG5186	slim	scruin like at the midline	37121	---	---	---	IPR006652 // Kelch repeat // 7.4E-4 /// IPR006652 // Kelch repeat // 4.0E-6 /// IPR006652 // Kelch repeat // 0.0012 /// IPR006652 // Kelch repeat // 0.024 /// IPR006652 // Kelch repeat // 7.4E-4 /// IPR006652 // Kelch repeat // 4.0E-6 /// IPR006652 // Kelch repeat // 0.0012 /// IPR006652 // Kelch repeat // 0.024
2522	143721_at	0.495615	1.86392	7.6785	1.06e-08	1.55e-07	9.34602	FBgn0013765	CG4832	cnn	centrosomin	36491	8017 // microtubule binding // inferred from sequence or structural similarity /// 42623 // ATPase activity, coupled // inferred from electronic annotation /// 8017 // microtubule binding // inferred from sequence similarity	226 // microtubule cytoskeleton organization and biogenesis // non-traceable author statement /// 280 // nuclear division // non-traceable author statement /// 7017 // microtubule-based process // inferred from sequence or structural similarity /// 7052 // mitotic spindle organization and biogenesis // non-traceable author statement /// 7098 // centrosome cycle // inferred from mutant phenotype /…	242 // pericentriolar material // non-traceable author statement /// 5737 // cytoplasm // non-traceable author statement /// 5813 // centrosome // inferred from direct assay /// 5813 // centrosome // non-traceable author statement /// 5875 // microtubule associated complex // inferred from sequence or structural similarity /// 16459 // myosin // inferred from sequence or structural similarity ///…	---
2269	143468_at	0.49502	1.43388	4.87518	2.97e-05	0.000204201	1.38014	FBgn0004429	CG9116	LysP	Lysozyme P	38129	3796 // lysozyme activity // inferred from sequence or structural similarity /// 3796 // lysozyme activity // non-traceable author statement /// 3796 // lysozyme activity // inferred from electronic annotation /// 3824 // catalytic activity // inferred from electronic annotation /// 16787 // hydrolase activity // inferred from electronic annotation /// 16798 // hydrolase activity, acting on glyco…	6960 // antimicrobial humoral response (sensu Protostomia) // non-traceable author statement /// 16998 // cell wall catabolism // inferred from electronic annotation /// 5975 // carbohydrate metabolism // inferred from electronic annotation /// 19835 // cytolysis // inferred from electronic annotation /// 42742 // defense response to bacteria // inferred from electronic annotation	5576 // extracellular region // inferred from electronic annotation	IPR001916 // Glycoside hydrolase, family 22 // 1.7E-59
641	141840_at	0.494859	0.604536	7.19566	3.97e-08	5.25e-07	8.01004	---	---	---	---	---	---	---	---	---
11485	152684_at	0.492862	2.78492	8.17913	2.76e-09	4.6e-08	10.7039	FBgn0032358	CG4851	CG4851	CG4851	34564	8474 // palmitoyl-(protein) hydrolase activity // inferred from electronic annotation /// 16787 // hydrolase activity // inferred from electronic annotation /// 16788 // hydrolase activity, acting on ester bonds // inferred from electronic annotation /// 3824 // catalytic activity // inferred from electronic annotation	6464 // protein modification // inferred from electronic annotation /// 6497 // protein amino acid lipidation // inferred from electronic annotation /// 19538 // protein metabolism // inferred from electronic annotation	5764 // lysosome // inferred from electronic annotation	IPR002472 // Palmitoyl protein thioesterase // 5.6E-11
7923	149122_at	0.492747	0.527106	10.3674	1.14e-11	3.12e-10	16.2699	FBgn0053969	---	CG33969	CG33969	40252	---	---	---	---
10205	151404_at	0.492571	0.297547	7.98582	4.62e-09	7.28e-08	10.1831	---	---	---	---	---	---	---	---	---
11827	153026_at	0.490344	2.97714	6.35133	4.25e-07	4.55e-06	5.62243	FBgn0033383	CG8057	CG8057	CG8057	35931	4679 // AMP-activated protein kinase activity // inferred from sequence or structural similarity /// 4702 // receptor signaling protein serine/threonine kinase activity // inferred from electronic annotation /// 4679 // AMP-activated protein kinase activity // inferred from sequence similarity	6468 // protein amino acid phosphorylation // inferred from electronic annotation	---	IPR006828 // 5-AMP-activated protein kinase, beta subunit, complex-interacting region // 4.7E-49 /// IPR006828 // 5-AMP-activated protein kinase, beta subunit, complex-interacting region // 4.7E-49
2412	143611_at	0.489883	2.04409	5.89357	1.57e-06	1.46e-05	4.30886	FBgn0003432	CG1915	sls	sallimus	44013	4687 // myosin light chain kinase activity // inferred from sequence or structural similarity /// 5200 // structural constituent of cytoskeleton // inferred from electronic annotation /// 4687 // myosin light chain kinase activity // inferred from sequence similarity	6139 // nucleobase, nucleoside, nucleotide and nucleic acid metabolism // inferred from electronic annotation /// 6936 // muscle contraction // inferred from electronic annotation /// 7010 // cytoskeleton organization and biogenesis // inferred from electronic annotation /// 7076 // mitotic chromosome condensation // inferred from mutant phenotype /// 7498 // mesoderm development // inferred from…	16020 // membrane // inferred from electronic annotation	IPR010939 // Protein of unknown function DUF1136 // 0.04 /// IPR010939 // Protein of unknown function DUF1136 // 3.4E-12 /// IPR010939 // Protein of unknown function DUF1136 // 0.33 /// IPR010939 // Protein of unknown function DUF1136 // 9.6E-7 /// IPR010939 // Protein of unknown function DUF1136 // 6.5E-4 /// IPR010939 // Protein of unknown function DUF1136 // 5.6E-7 /// IPR010939 // Protein of …
13403	154602_at	0.489759	1.89614	7.74794	8.76e-09	1.3e-07	9.53608	FBgn0010389	CG7223	htl	heartless	42160	4713 // protein-tyrosine kinase activity // inferred from sequence or structural similarity /// 4713 // protein-tyrosine kinase activity // non-traceable author statement /// 5007 // fibroblast growth factor receptor activity // inferred from sequence or structural similarity /// 5007 // fibroblast growth factor receptor activity // non-traceable author statement /// 5007 // fibroblast growth fac…	1710 // mesodermal cell fate commitment // inferred from genetic interaction /// 1710 // mesodermal cell fate commitment // inferred from mutant phenotype /// 6468 // protein amino acid phosphorylation // inferred from sequence or structural similarity /// 6468 // protein amino acid phosphorylation // non-traceable author statement /// 7280 // pole cell migration // traceable author statement ///…	5886 // plasma membrane // inferred from sequence or structural similarity /// 16021 // integral to membrane // inferred from sequence or structural similarity /// 16021 // integral to membrane // non-traceable author statement /// 16020 // membrane // inferred from electronic annotation /// 16021 // integral to membrane // inferred from electronic annotation /// 5886 // plasma membrane // inferr…	IPR000719 // Protein kinase // 9.7E-87 /// IPR007110 // Immunoglobulin-like // 8.6E-10
5512	146711_at	0.489588	1.68561	8.66405	7.75e-10	1.45e-08	11.9904	FBgn0033129	CG12844	Tsp42Eh	Tetraspanin 42Eh	35617	---	---	16021 // integral to membrane // inferred from sequence or structural similarity /// 16021 // integral to membrane // inferred from electronic annotation /// 16021 // integral to membrane // inferred from sequence similarity	IPR000301 // CD9/CD37/CD63 antigen // 3.3E-17 /// IPR000301 // CD9/CD37/CD63 antigen // 4.6E-24
8708	149907_r_at	0.489541	1.5775	5.46517	5.41e-06	4.47e-05	3.07454	FBgn0038243	CG8066	CG8066	CG8066	41766	4869 // cysteine protease inhibitor activity // inferred from sequence or structural similarity /// 5515 // protein binding // inferred from physical interaction /// 4869 // cysteine protease inhibitor activity // inferred from electronic annotation /// 4869 // cysteine protease inhibitor activity // inferred from sequence similarity	---	---	IPR000010 // Cysteine protease inhibitor // 9.8E-12
6237	147436_at	0.488262	3.40028	5.84477	1.81e-06	1.66e-05	4.16837	FBgn0068150 /// FBgn0063497	CG17524	DyakGstE3 /// GstE3	GstE3 /// Glutathione S transferase E3	---	---	---	---	IPR004046 // Glutathione S-transferase, C-terminal // 1.9E-11 /// IPR004045 // Glutathione S-transferase, N-terminal // 3.7E-20
1165	142364_at	0.488096	1.60265	11.4529	9.39e-13	3.16e-11	18.8011	FBgn0042712	CG1898	HBS1	HBS1	117365	3746 // translation elongation factor activity // inferred from electronic annotation /// 3747 // translation release factor activity // inferred from sequence or structural similarity /// 5525 // GTP binding // inferred from electronic annotation /// 3747 // translation release factor activity // inferred from sequence similarity	6415 // translational termination // inferred from sequence or structural similarity /// 6445 // regulation of translation // inferred from electronic annotation /// 6412 // protein biosynthesis // inferred from electronic annotation /// 6415 // translational termination // inferred from sequence similarity	5829 // cytosol // inferred from sequence or structural similarity /// 5829 // cytosol // inferred from sequence similarity	IPR004161 // Elongation factor Tu, domain 2 // 2.4E-12 /// IPR000795 // Protein synthesis factor, GTP-binding // 2.1E-77 /// IPR004160 // Elongation factor Tu, C-terminal // 3.7E-16
1806	143005_at	0.487727	1.30038	3.57907	0.00114245	0.0048265	-2.1982	FBgn0025628	CG4199	CG4199	CG4199	31174	15036 // disulfide oxidoreductase activity // inferred from electronic annotation /// 16491 // oxidoreductase activity // inferred from electronic annotation	6118 // electron transport // inferred from electronic annotation /// 6124 // ferredoxin metabolism // inferred from electronic annotation /// 6800 // oxygen and reactive oxygen species metabolism // inferred from electronic annotation /// 6952 // defense response // inferred from electronic annotation	---	IPR005806 // Rieske [2Fe-2S] domain // 3.3E-19 /// IPR001327 // FAD-dependent pyridine nucleotide-disulphide oxidoreductase // 1.8E-71 /// IPR005806 // Rieske [2Fe-2S] domain // 3.3E-19 /// IPR001327 // FAD-dependent pyridine nucleotide-disulphide oxidoreductase // 1.8E-71 /// IPR005806 // Rieske [2Fe-2S] domain // 3.3E-19 /// IPR001327 // FAD-dependent pyridine nucleotide-disulphide oxidoreducta…
2237	143436_at	0.487545	4.64171	6.3389	4.41e-07	4.7e-06	5.58688	FBgn0004175	CG17935	Mst84Dd	Male-specific RNA 84Dd	40886	5506 // iron ion binding // inferred from electronic annotation	6118 // electron transport // inferred from electronic annotation /// 7275 // development // inferred from electronic annotation /// 7283 // spermatogenesis // inferred from electronic annotation /// 30154 // cell differentiation // inferred from electronic annotation	---	IPR005634 // Male specific sperm protein // 3.4E-18
13543	154742_at	0.486879	1.56876	5.98609	1.21e-06	1.16e-05	4.57504	FBgn0011744	CG7558	Arp66B	Actin-related protein 66B	38898	3779 // actin binding // inferred from sequence or structural similarity /// 5200 // structural constituent of cytoskeleton // inferred from sequence or structural similarity /// 5515 // protein binding // inferred from physical interaction /// 166 // nucleotide binding // inferred from electronic annotation /// 5198 // structural molecule activity // inferred from electronic annotation /// 5515 …	7010 // cytoskeleton organization and biogenesis // inferred from sequence or structural similarity /// 7303 // cytoplasmic transport, nurse cell to oocyte // inferred from mutant phenotype /// 7413 // axonal fasciculation // inferred from mutant phenotype /// 8064 // regulation of actin polymerization and/or depolymerization // non-traceable author statement /// 8335 // ovarian ring canal stabil…	5884 // actin filament // inferred from sequence or structural similarity /// 5885 // Arp2/3 protein complex // inferred from sequence or structural similarity /// 5885 // Arp2/3 protein complex // non-traceable author statement /// 15629 // actin cytoskeleton // non-traceable author statement /// 5856 // cytoskeleton // inferred from electronic annotation /// 5884 // actin filament // inferred f…	IPR004000 // Actin/actin-like // 3.3E-98
4308	145507_at	0.485203	2.37858	5.43201	5.95e-06	4.86e-05	2.979	FBgn0031213	CG11372	galectin	galectin	33162	5102 // receptor binding // inferred from electronic annotation /// 15143 // urate transporter activity // inferred from sequence or structural similarity /// 16936 // galactoside binding // inferred from direct assay /// 16936 // galactoside binding // inferred from sequence or structural similarity /// 5529 // sugar binding // inferred from electronic annotation /// 15143 // urate transporter a…	6917 // induction of apoptosis // inferred from electronic annotation	5829 // cytosol // inferred from direct assay	IPR001079 // Galectin, galactose-binding lectin // 3.2E-19 /// IPR001079 // Galectin, galactose-binding lectin // 3.1E-9
12996	154195_at	0.48498	3.74232	3.31236	0.00233301	0.00868832	-2.88457	FBgn0014028	CG3283	SdhB	Succinate dehydrogenase B	35590	5506 // iron ion binding // inferred from electronic annotation /// 8177 // succinate dehydrogenase (ubiquinone) activity // inferred from sequence or structural similarity /// 8177 // succinate dehydrogenase (ubiquinone) activity // non-traceable author statement /// 8177 // succinate dehydrogenase (ubiquinone) activity // inferred from electronic annotation /// 16491 // oxidoreductase activity …	6099 // tricarboxylic acid cycle // inferred from sequence or structural similarity /// 6099 // tricarboxylic acid cycle // non-traceable author statement /// 6118 // electron transport // inferred from electronic annotation /// 6099 // tricarboxylic acid cycle // inferred from electronic annotation /// 6810 // transport // inferred from electronic annotation /// 6099 // tricarboxylic acid cycle …	5749 // respiratory chain complex II (sensu Eukaryota) // inferred from sequence or structural similarity /// 5749 // respiratory chain complex II (sensu Eukaryota) // non-traceable author statement /// 5739 // mitochondrion // inferred from electronic annotation /// 16020 // membrane // inferred from electronic annotation /// 5749 // respiratory chain complex II (sensu Eukaryota) // inferred fro…	---
11829	153028_at	0.483788	5.28985	4.33165	0.000140761	0.000812889	-0.156356	FBgn0014184	CG16747	Oda	Ornithine decarboxylase antizyme	36307	8073 // ornithine decarboxylase inhibitor activity // inferred from sequence or structural similarity /// 8073 // ornithine decarboxylase inhibitor activity // non-traceable author statement /// 5515 // protein binding // inferred from physical interaction /// 4857 // enzyme inhibitor activity // inferred from electronic annotation /// 8073 // ornithine decarboxylase inhibitor activity // inferre…	30154 // cell differentiation // non-traceable author statement /// 7275 // development // inferred from electronic annotation	---	IPR002993 // Ornithine decarboxylase antizyme // 1.0E-126 /// IPR002993 // Ornithine decarboxylase antizyme // 1.0E-126 /// IPR002993 // Ornithine decarboxylase antizyme // 1.0E-126 /// IPR002993 // Ornithine decarboxylase antizyme // 1.0E-126
6896	148095_at	0.48375	3.51322	7.64134	1.17e-08	1.69e-07	9.24407	FBgn0035423	CG17737	CG17737	CG17737	38398	3743 // translation initiation factor activity // inferred from electronic annotation /// 5515 // protein binding // inferred from physical interaction	6412 // protein biosynthesis // non-traceable author statement /// 6413 // translational initiation // inferred from electronic annotation /// 6412 // protein biosynthesis // inferred from electronic annotation /// 6417 // regulation of protein biosynthesis // inferred from electronic annotation /// 6445 // regulation of translation // inferred from electronic annotation	---	IPR001950 // Translation initiation factor SUI1 // 2.2E-42
1632	142831_at	0.481887	1.44046	6.55426	2.39e-07	2.68e-06	6.20123	FBgn0035139	CG13891	CG13891	CG13891	38066	---	---	---	---
10554	151753_r_at	0.481731	2.80129	10.7227	4.95e-12	1.47e-10	17.115	FBgn0053123	CG33123	CG33123	CG33123	326262	3729 // mRNA binding // inferred from electronic annotation /// 4601 // peroxidase activity // inferred from electronic annotation /// 4823 // leucine-tRNA ligase activity // inferred from sequence or structural similarity /// 5524 // ATP binding // inferred from electronic annotation /// 4812 // aminoacyl-tRNA ligase activity // inferred from electronic annotation /// 4823 // leucine-tRNA ligase…	6418 // tRNA aminoacylation for protein translation // inferred from electronic annotation /// 6979 // response to oxidative stress // inferred from electronic annotation /// 6412 // protein biosynthesis // inferred from electronic annotation	5737 // cytoplasm // inferred from electronic annotation	---
12886	154085_at	0.480875	1.59069	5.58605	3.82e-06	3.27e-05	3.42294	FBgn0000566	CG5345	Eip55E	Eip55E	37143	4123 // cystathionine gamma-lyase activity // non-traceable author statement /// 4123 // cystathionine gamma-lyase activity // traceable author statement /// 5515 // protein binding // inferred from physical interaction	96 // sulfur amino acid metabolism // non-traceable author statement /// 6520 // amino acid metabolism // inferred from electronic annotation	---	IPR000277 // Cys/Met metabolism pyridoxal-phosphate-dependent enzymes // 1.0E-126
9088	150287_at	0.479818	1.72374	8.38676	1.6e-09	2.78e-08	11.2583	FBgn0038842	CG5630	CG5630	CG5630	42478	5515 // protein binding // inferred from physical interaction	---	---	---
5166	146365_at	0.47949	3.14274	5.58129	3.87e-06	3.31e-05	3.40921	FBgn0032588	CG5968	CG5968	CG5968	34986	---	---	---	---
10719	151918_s_at	0.479415	3.68098	6.761	1.34e-07	1.57e-06	6.78799	FBgn0027594	CG2086	drpr	draper	38218	4872 // receptor activity // inferred from electronic annotation /// 5201 // extracellular matrix structural constituent // inferred from electronic annotation /// 5198 // structural molecule activity // inferred from electronic annotation	6909 // phagocytosis // inferred from mutant phenotype /// 6909 // phagocytosis // traceable author statement /// 7155 // cell adhesion // inferred from sequence or structural similarity /// 7165 // signal transduction // inferred from electronic annotation /// 7398 // ectoderm development // inferred from electronic annotation /// 7399 // nervous system development // inferred from electronic an…	31224 // intrinsic to membrane // non-traceable author statement	IPR006209 // EGF-like domain // 1.1E-4 /// IPR006209 // EGF-like domain // 7.8E-6 /// IPR006209 // EGF-like domain // 2.0E-4 /// IPR006209 // EGF-like domain // 1.9E-5 /// IPR006209 // EGF-like domain // 7.2E-6 /// IPR006209 // EGF-like domain // 2.1E-4 /// IPR006209 // EGF-like domain // 1.4E-5 /// IPR006209 // EGF-like domain // 2.2E-4 /// IPR006209 // EGF-like domain // 9.2E-5 /// IPR006209 //…
5844	147043_at	0.479162	1.37593	4.77598	3.95e-05	0.000264137	1.0973	FBgn0033659	CG18188	Damm	Death associated molecule related to Mch2	36266	30693 // caspase activity // inferred from direct assay /// 30693 // caspase activity // inferred from sequence or structural similarity /// 30693 // caspase activity // non-traceable author statement /// 30693 // caspase activity // traceable author statement /// 8233 // peptidase activity // inferred from electronic annotation /// 30693 // caspase activity // inferred from electronic annotation…	6508 // proteolysis // inferred from electronic annotation /// 6915 // apoptosis // inferred from genetic interaction /// 6917 // induction of apoptosis // inferred from mutant phenotype /// 7242 // intracellular signaling cascade // inferred from electronic annotation /// 12501 // programmed cell death // traceable author statement	---	IPR001309 // Caspase-1, p20 // 1.5E-60
399	141598_at	0.478663	2.61662	4.72532	4.57e-05	0.000299255	0.953173	FBgn0032731	CG10641	CG10641	CG10641	35158	5509 // calcium ion binding // inferred from sequence or structural similarity /// 5509 // calcium ion binding // non-traceable author statement /// 5509 // calcium ion binding // inferred from electronic annotation /// 5509 // calcium ion binding // inferred from sequence similarity	7498 // mesoderm development // inferred from expression pattern	---	IPR002048 // Calcium-binding EF-hand // 2.5E-5 /// IPR002048 // Calcium-binding EF-hand // 8.0E-8
4628	145827_at	0.478381	1.38846	6.52334	2.61e-07	2.9e-06	6.11323	FBgn0051915	CG31915	CG31915	CG31915	319025	8475 // procollagen-lysine 5-dioxygenase activity // inferred from sequence or structural similarity /// 30234 // enzyme regulator activity // inferred from electronic annotation /// 8475 // procollagen-lysine 5-dioxygenase activity // inferred from sequence similarity	5975 // carbohydrate metabolism // inferred from electronic annotation /// 9103 // lipopolysaccharide biosynthesis // inferred from electronic annotation	---	IPR002654 // Glycosyl transferase, family 25 // 1.1E-44
12036	153235_at	0.477863	1.7812	6.11109	8.44e-07	8.44e-06	4.93416	FBgn0023184	---	Nop60B	Nucleolar protein at 60B	37873	3729 // mRNA binding // inferred from electronic annotation /// 4730 // pseudouridylate synthase activity // inferred from sequence or structural similarity /// 19237 // centromeric DNA binding // inferred from electronic annotation /// 5515 // protein binding // inferred from physical interaction /// 3723 // RNA binding // inferred from electronic annotation /// 4730 // pseudouridylate synthase …	1522 // pseudouridine synthesis // inferred from mutant phenotype /// 6364 // rRNA processing // inferred from mutant phenotype /// 6364 // rRNA processing // non-traceable author statement /// 7046 // ribosome biogenesis // inferred from mutant phenotype /// 7059 // chromosome segregation // inferred from electronic annotation /// 7067 // mitosis // inferred from electronic annotation /// 7281 /…	5634 // nucleus // non-traceable author statement /// 5730 // nucleolus // inferred from direct assay /// 5730 // nucleolus // inferred from sequence or structural similarity /// 5730 // nucleolus // non-traceable author statement /// 5634 // nucleus // inferred from electronic annotation /// 30529 // ribonucleoprotein complex // inferred from electronic annotation /// 5730 // nucleolus // inferr…	---
3799	144998_at	0.477811	0.294412	3.11177	0.00393939	0.0133926	-3.38382	FBgn0030469	CG15745	CG15745	CG15745	32283	---	---	---	---
10464	151663_at	0.477591	2.76875	4.66425	5.45e-05	0.000351974	0.779826	FBgn0052649	CG32649	CG32649	CG32649	32239	4672 // protein kinase activity // non-traceable author statement	6122 // mitochondrial electron transport, ubiquinol to cytochrome c // inferred from sequence or structural similarity /// 6732 // coenzyme metabolism // inferred from electronic annotation /// 51189 // prosthetic group metabolism // inferred from electronic annotation /// 6122 // mitochondrial electron transport, ubiquinol to cytochrome c // inferred from sequence similarity	5739 // mitochondrion // inferred from sequence or structural similarity /// 5739 // mitochondrion // inferred from sequence similarity	IPR004147 // ABC1 protein // 1.1E-55
11271	152470_at	0.47734	1.24828	10.1849	1.76e-11	4.56e-10	15.8296	FBgn0032793	CG10189	CG10189	CG10189	35234	---	---	---	---
7927	149126_at	0.477081	1.39188	5.82181	1.94e-06	1.76e-05	4.10227	FBgn0029158	CG5231	Las	Lipoic acid synthase	40259	3824 // catalytic activity // inferred from electronic annotation /// 5506 // iron ion binding // inferred from electronic annotation /// 16740 // transferase activity // inferred from electronic annotation /// 16992 // lipoate synthase activity // inferred from electronic annotation /// 17140 // lipoic acid synthase activity // inferred from sequence or structural similarity /// 5515 // protein …	6732 // coenzyme metabolism // inferred from electronic annotation /// 9105 // lipoic acid biosynthesis // inferred from sequence or structural similarity /// 9107 // lipoate biosynthesis // inferred from electronic annotation /// 51189 // prosthetic group metabolism // inferred from electronic annotation /// 9105 // lipoic acid biosynthesis // inferred from sequence similarity	5739 // mitochondrion // inferred from sequence or structural similarity /// 5739 // mitochondrion // inferred from sequence similarity	IPR007197 // Radical SAM // 7.6E-26
13567	154766_at	0.476819	1.74926	8.971	3.52e-10	7.04e-09	12.7894	FBgn0030026	CG10964	sni	sniffer	31761	4090 // carbonyl reductase (NADPH) activity // inferred from direct assay /// 16491 // oxidoreductase activity // inferred from electronic annotation	8152 // metabolism // inferred from electronic annotation	---	IPR002198 // Short-chain dehydrogenase/reductase SDR // 7.6E-21
2506	143705_r_at	0.475891	5.83375	3.55204	0.00122919	0.00512224	-2.26882	FBgn0013301	CG4478	Mst35Bb	Male-specific-transcript-35Bb	34867	3677 // DNA binding // inferred from sequence or structural similarity /// 3677 // DNA binding // inferred from sequence similarity	---	---	IPR010477 // Protein of unknown function DUF1074 // 2.8E-87
573	141772_at	0.475587	2.15618	4.74184	4.36e-05	0.000287394	1.00016	FBgn0039209	CG13624	CG13624	CG13624	42930	3677 // DNA binding // inferred from electronic annotation /// 42803 // protein homodimerization activity // inferred from sequence or structural similarity /// 5515 // protein binding // inferred from physical interaction /// 42803 // protein homodimerization activity // inferred from sequence similarity	6355 // regulation of transcription, DNA-dependent // inferred from electronic annotation	5634 // nucleus // inferred from electronic annotation	---
8218	149417_at	0.475378	2.11617	6.41568	3.54e-07	3.86e-06	5.80626	FBgn0037463	CG1984	djl	don juan like	40839	---	---	16007 // mitochondrial derivative // non-traceable author statement /// 19861 // flagellum // non-traceable author statement	---
912	142111_at	0.475019	1.16945	6.85348	1.03e-07	1.24e-06	7.04938	---	---	---	---	---	---	---	---	---
91	141290_at	0.474833	3.17527	6.81566	1.15e-07	1.36e-06	6.94258	FBgn0034494	CG10444	CG10444	CG10444	37294	8324 // cation transporter activity // inferred from electronic annotation /// 8523 // sodium-dependent multivitamin transporter activity // inferred from sequence or structural similarity /// 5215 // transporter activity // inferred from electronic annotation /// 8523 // sodium-dependent multivitamin transporter activity // inferred from sequence similarity	6732 // coenzyme metabolism // inferred from electronic annotation /// 6812 // cation transport // inferred from electronic annotation /// 6858 // extracellular transport // inferred from electronic annotation /// 51189 // prosthetic group metabolism // inferred from electronic annotation /// 6810 // transport // inferred from electronic annotation /// 6811 // ion transport // inferred from elect…	16020 // membrane // inferred from electronic annotation /// 16021 // integral to membrane // inferred from electronic annotation	IPR001734 // Na+/solute symporter // 2.2E-7 /// IPR001734 // Na+/solute symporter // 7.9E-5
2729	143928_at	0.474828	3.74716	9.14135	2.29e-10	4.71e-09	13.2276	FBgn0020443	CG6382	Elf	Ef1like factor	34658	3747 // translation release factor activity // inferred from sequence or structural similarity /// 3747 // translation release factor activity // non-traceable author statement /// 3924 // GTPase activity // non-traceable author statement /// 5525 // GTP binding // inferred from sequence or structural similarity /// 8079 // translation termination factor activity // inferred from sequence or stru…	6415 // translational termination // inferred from mutant phenotype /// 6415 // translational termination // inferred from sequence or structural similarity /// 6415 // translational termination // non-traceable author statement /// 6445 // regulation of translation // inferred from electronic annotation /// 6412 // protein biosynthesis // inferred from electronic annotation /// 6415 // translati…	5829 // cytosol // inferred from sequence or structural similarity /// 5829 // cytosol // non-traceable author statement /// 5829 // cytosol // inferred from sequence similarity	IPR004161 // Elongation factor Tu, domain 2 // 5.4E-14 /// IPR000795 // Protein synthesis factor, GTP-binding // 4.0E-89 /// IPR004160 // Elongation factor Tu, C-terminal // 1.5E-38
10359	151558_r_at	0.474264	4.14462	3.29364	0.00245116	0.00904894	-2.93182	---	CG33691 /// CG33692	---	---	---	5515 // protein binding // inferred from physical interaction	---	---	---
1295	142494_at	0.474201	6.35489	4.16114	0.000228003	0.00121688	-0.629755	FBgn0003360	CG16944	sesB	stress-sensitive B	32007	5386 // carrier activity // inferred from sequence or structural similarity /// 5471 // ATP:ADP antiporter activity // inferred from mutant phenotype /// 5471 // ATP:ADP antiporter activity // inferred from sequence or structural similarity /// 5471 // ATP:ADP antiporter activity // non-traceable author statement /// 5488 // binding // inferred from electronic annotation /// 5215 // transporter a…	6139 // nucleobase, nucleoside, nucleotide and nucleic acid metabolism // inferred from electronic annotation /// 6812 // cation transport // inferred from electronic annotation /// 7629 // flight behavior // inferred from mutant phenotype /// 9612 // response to mechanical stimulus // inferred from mutant phenotype /// 15866 // ADP transport // inferred from sequence or structural similarity ///…	5740 // mitochondrial envelope // inferred from sequence or structural similarity /// 5743 // mitochondrial inner membrane // inferred from sequence or structural similarity /// 5743 // mitochondrial inner membrane // non-traceable author statement /// 16021 // integral to membrane // non-traceable author statement /// 5743 // mitochondrial inner membrane // inferred from expression pattern /// 5…	IPR001993 // Mitochondrial substrate carrier // 1.3E-37 /// IPR001993 // Mitochondrial substrate carrier // 5.1E-31 /// IPR001993 // Mitochondrial substrate carrier // 1.4E-14 /// IPR001993 // Mitochondrial substrate carrier // 6.4E-39 /// IPR001993 // Mitochondrial substrate carrier // 3.3E-32 /// IPR001993 // Mitochondrial substrate carrier // 2.3E-19 /// IPR001993 // Mitochondrial substrate ca…
13644	154843_at	0.473241	2.59885	5.45093	5.64e-06	4.64e-05	3.0335	FBgn0035850	CG7986	Atg18	Autophagy-specific gene 18	38913	---	6914 // autophagy // inferred from mutant phenotype	---	---
11191	152390_at	0.472753	2.95639	6.74792	1.39e-07	1.62e-06	6.75098	FBgn0034948	CG3825	CG3825	CG3825	37820	---	---	---	---
4934	146133_at	0.472685	2.63127	4.54135	7.74e-05	0.000481787	0.432188	FBgn0032202	CG18619	CG18619	CG18619	34371	3677 // DNA binding // inferred from electronic annotation /// 46983 // protein dimerization activity // inferred from sequence or structural similarity /// 46983 // protein dimerization activity // inferred from sequence similarity	6355 // regulation of transcription, DNA-dependent // inferred from electronic annotation	5634 // nucleus // inferred from electronic annotation	---
7823	149022_at	0.472273	0.824744	4.4959	8.82e-05	0.00053715	0.304099	FBgn0036830	CG14077	CG14077	CG14077	40066	4129 // cytochrome-c oxidase activity // inferred from sequence or structural similarity /// 4970 // ionotropic glutamate receptor activity // inferred from electronic annotation /// 5234 // glutamate-gated ion channel activity // inferred from electronic annotation /// 4129 // cytochrome-c oxidase activity // inferred from sequence similarity	6118 // electron transport // inferred from electronic annotation	5751 // respiratory chain complex IV (sensu Eukaryota) // inferred from sequence or structural similarity /// 16020 // membrane // inferred from electronic annotation /// 5751 // respiratory chain complex IV (sensu Eukaryota) // inferred from sequence similarity	IPR001349 // Cytochrome c oxidase, subunit VIa // 3.0E-10
563	141762_at	0.469076	4.59807	7.6744	1.07e-08	1.56e-07	9.33478	FBgn0013770	CG6692	Cp1	Cysteine proteinase-1	36546	3676 // nucleic acid binding // inferred from electronic annotation /// 4217 // cathepsin L activity // inferred from sequence or structural similarity /// 4217 // cathepsin L activity // non-traceable author statement /// 5515 // protein binding // inferred from physical interaction /// 4197 // cysteine-type endopeptidase activity // inferred from electronic annotation /// 8233 // peptidase acti…	6355 // regulation of transcription, DNA-dependent // inferred from electronic annotation /// 6508 // proteolysis // inferred from electronic annotation /// 30163 // protein catabolism // non-traceable author statement /// 35071 // salivary gland cell autophagic cell death // inferred from expression pattern /// 48102 // autophagic cell death // inferred from expression pattern /// 7275 // develo…	5764 // lysosome // non-traceable author statement /// 5764 // lysosome // inferred from electronic annotation	IPR000668 // Peptidase C1A, papain // 1.0E-126 /// IPR000668 // Peptidase C1A, papain // 1.0E-126
12413	153612_at	0.467971	1.67418	9.10145	2.53e-10	5.14e-09	13.1253	FBgn0036240	CG6928	CG6928	CG6928	39367	5215 // transporter activity // non-traceable author statement /// 15381 // high affinity sulfate permease activity // inferred from sequence or structural similarity /// 5215 // transporter activity // inferred from electronic annotation /// 15381 // high affinity sulfate permease activity // inferred from sequence similarity	6790 // sulfur metabolism // inferred from electronic annotation /// 6820 // anion transport // inferred from electronic annotation /// 6858 // extracellular transport // inferred from electronic annotation /// 6810 // transport // inferred from electronic annotation	16021 // integral to membrane // inferred from electronic annotation	IPR001902 // Sulphate transporter // 1.4E-17 /// IPR001902 // Sulphate transporter // 1.8E-39
11559	152758_at	0.467638	1.93268	4.17083	0.000221858	0.00118998	-0.602981	FBgn0037709	CG8199	CG8199	CG8199	41149	3863 // 3-methyl-2-oxobutanoate dehydrogenase (2-methylpropanoyl-transferring) activity // inferred from sequence or structural similarity /// 16624 // oxidoreductase activity, acting on the aldehyde or oxo group of donors, disulfide as acceptor // inferred from electronic annotation /// 3863 // 3-methyl-2-oxobutanoate dehydrogenase (2-methylpropanoyl-transferring) activity // inferred from seque…	9063 // amino acid catabolism // inferred from electronic annotation /// 46949 // acyl-CoA biosynthesis // inferred from sequence or structural similarity /// 8152 // metabolism // inferred from electronic annotation /// 46949 // acyl-CoA biosynthesis // inferred from sequence similarity	17086 // 3-methyl-2-oxobutanoate dehydrogenase (lipoamide) complex // inferred from sequence or structural similarity /// 17086 // 3-methyl-2-oxobutanoate dehydrogenase (lipoamide) complex // inferred from sequence similarity	IPR001017 // Dehydrogenase, E1 component // 1.1E-113
4955	146154_at	0.467382	2.47069	4.88447	2.89e-05	0.000199592	1.40668	---	CG17768 /// CG33677	---	---	---	17070 // U6 snRNA binding // inferred from sequence or structural similarity	6397 // mRNA processing // inferred from electronic annotation	5634 // nucleus // inferred from electronic annotation /// 5732 // small nucleolar ribonucleoprotein complex // inferred from electronic annotation /// 30529 // ribonucleoprotein complex // inferred from electronic annotation	---
10322	151521_r_at	0.466927	4.8437	3.14832	0.00358409	0.0123617	-3.29405	FBgn0003475	CG10076	spir	spire	45931	3779 // actin binding // non-traceable author statement /// 3779 // actin binding // traceable author statement /// 5515 // protein binding // inferred from physical interaction /// 8270 // zinc ion binding // inferred from electronic annotation	7304 // eggshell formation (sensu Insecta) // inferred from mutant phenotype /// 7315 // pole plasm assembly // inferred from mutant phenotype /// 7315 // pole plasm assembly // non-traceable author statement /// 7315 // pole plasm assembly // traceable author statement /// 7316 // pole plasm RNA localization // inferred from mutant phenotype /// 9993 // oogenesis (sensu Insecta) // traceable aut…	---	---
6364	147563_at	0.466666	0.809615	6.56897	2.29e-07	2.58e-06	6.2431	FBgn0061361 /// FBgn0061362	CG33785 /// CG33786	CG33786 /// CG33785	CG33786 /// CG33785	3772344 /// 3772640	3677 // DNA binding // inferred from electronic annotation /// 3700 // transcription factor activity // inferred from electronic annotation /// 3899 // DNA-directed RNA polymerase activity // inferred from sequence or structural similarity /// 45182 // translation regulator activity // inferred from sequence or structural similarity /// 3899 // DNA-directed RNA polymerase activity // inferred fro…	6354 // RNA elongation // inferred from electronic annotation /// 6359 // regulation of transcription from RNA polymerase III promoter // inferred from sequence or structural similarity /// 6412 // protein biosynthesis // inferred from sequence or structural similarity /// 6359 // regulation of transcription from RNA polymerase III promoter // inferred from sequence similarity /// 6412 // protein…	5666 // DNA-directed RNA polymerase III complex // inferred from sequence or structural similarity /// 5666 // DNA-directed RNA polymerase III complex // inferred from sequence similarity	---
9334	150533_at	0.466506	0.173233	5.90922	1.51e-06	1.41e-05	4.35389	FBgn0039239	CG13641	CG13641	CG13641	42969	---	---	---	---
11747	152946_at	0.466181	3.71385	8.18068	2.75e-09	4.58e-08	10.708	FBgn0023143	CG1782	Uba1	Ubiquitin activating enzyme 1	35998	4839 // ubiquitin activating enzyme activity // inferred from sequence or structural similarity /// 4839 // ubiquitin activating enzyme activity // non-traceable author statement /// 4842 // ubiquitin-protein ligase activity // non-traceable author statement /// 5515 // protein binding // inferred from physical interaction /// 166 // nucleotide binding // inferred from electronic annotation /// 3…	6508 // proteolysis // inferred from electronic annotation /// 6512 // ubiquitin cycle // non-traceable author statement /// 6464 // protein modification // inferred from electronic annotation /// 6512 // ubiquitin cycle // inferred from electronic annotation /// 6810 // transport // inferred from electronic annotation /// 6914 // autophagy // inferred from electronic annotation /// 15031 // prot…	---	IPR000127 // Ubiquitin-activating enzyme repeat // 2.1E-23 /// IPR000127 // Ubiquitin-activating enzyme repeat // 1.3E-39 /// IPR000594 // UBA/THIF-type NAD/FAD binding fold // 3.9E-34 /// IPR000594 // UBA/THIF-type NAD/FAD binding fold // 1.3E-52
12953	154152_at	0.465787	2.82596	4.97712	2.21e-05	0.000158278	1.67164	FBgn0020240	CG7586	Mcr	Macroglobulin complement-related	44071	4866 // endopeptidase inhibitor activity // inferred from sequence or structural similarity /// 4867 // serine-type endopeptidase inhibitor activity // inferred from electronic annotation /// 5125 // cytokine activity // inferred from electronic annotation /// 5515 // protein binding // inferred from physical interaction /// 4866 // endopeptidase inhibitor activity // inferred from electronic ann…	6508 // proteolysis // inferred from electronic annotation /// 6952 // defense response // inferred from electronic annotation /// 7165 // signal transduction // inferred from electronic annotation /// 7267 // cell-cell signaling // inferred from electronic annotation	---	IPR002172 // Low density lipoprotein-receptor, class A // 5.7E-8 /// IPR001599 // Alpha-2-macroglobulin // 3.8E-50 /// IPR002890 // Alpha-2-macroglobulin, N-terminal // 7.0E-14 /// IPR002890 // Alpha-2-macroglobulin, N-terminal // 1.1E-14
349	141548_at	0.465498	1.22705	4.89667	2.79e-05	0.000193941	1.44153	FBgn0029095	CG4276	aru	arouser	33268	3735 // structural constituent of ribosome // inferred from electronic annotation	6412 // protein biosynthesis // inferred from electronic annotation /// 7173 // epidermal growth factor receptor signaling pathway // inferred from sequence or structural similarity /// 7173 // epidermal growth factor receptor signaling pathway // non-traceable author statement /// 7173 // epidermal growth factor receptor signaling pathway // inferred from sequence similarity	5622 // intracellular // inferred from electronic annotation /// 5840 // ribosome // inferred from electronic annotation	IPR001452 // SH3 // 1.1E-6 /// IPR001452 // SH3 // 1.1E-6
10262	151461_r_at	0.465405	2.92509	5.31712	8.3e-06	6.53e-05	2.64811	---	---	---	---	---	---	---	---	---
8670	149869_at	0.465209	1.67606	6.13798	7.82e-07	7.87e-06	5.01133	FBgn0038196	CG9922	CG9922	CG9922	41708	5515 // protein binding // inferred from physical interaction	---	---	---
11284	152483_at	0.464491	5.13612	8.16602	2.86e-09	4.74e-08	10.6687	FBgn0035915	CG6372	CG6372	CG6372	38986	4178 // leucyl aminopeptidase activity // inferred from sequence or structural similarity /// 4177 // aminopeptidase activity // inferred from electronic annotation /// 4178 // leucyl aminopeptidase activity // inferred from sequence similarity	6508 // proteolysis // inferred from electronic annotation	5622 // intracellular // inferred from electronic annotation	IPR008283 // Peptidase M17, cytosol aminopeptidase, N-terminal // 7.1E-54 /// IPR000819 // Peptidase M17, cytosol aminopeptidase, C-terminal // 1.5E-93
7563	148762_at	0.464486	1.0007	5.64495	3.22e-06	2.82e-05	3.59271	FBgn0036440	CG17177	CG17177	CG17177	39601	---	7154 // cell communication // inferred from electronic annotation /// 7165 // signal transduction // inferred from electronic annotation	---	---
10643	151842_at	0.464407	4.13478	4.78493	3.85e-05	0.000258414	1.12278	FBgn0041102	CG7929	ocn	ocnus	43567	5515 // protein binding // inferred from physical interaction	---	---	IPR007702 // Janus/Ocnus // 1.0E-74
968	142167_at	0.464365	1.16372	8.69378	7.18e-10	1.35e-08	12.0683	FBgn0031497	CG17259	CG17259	CG17259	33518	3729 // mRNA binding // inferred from electronic annotation /// 4828 // serine-tRNA ligase activity // inferred from sequence or structural similarity /// 5524 // ATP binding // inferred from electronic annotation /// 5515 // protein binding // inferred from physical interaction /// 4812 // aminoacyl-tRNA ligase activity // inferred from electronic annotation /// 4828 // serine-tRNA ligase activi…	6434 // seryl-tRNA aminoacylation // inferred from sequence or structural similarity /// 6418 // tRNA aminoacylation for protein translation // inferred from electronic annotation /// 6434 // seryl-tRNA aminoacylation // inferred from electronic annotation /// 6434 // seryl-tRNA aminoacylation // inferred from sequence similarity	---	IPR002314 // tRNA synthetases, class-II (G, H, P and S) // 1.8E-51 /// IPR002317 // Seryl-tRNA synthetase, class IIa // 2.3E-27
10963	152162_at	0.464158	1.1261	7.53543	1.56e-08	2.2e-07	8.95273	FBgn0028523	CG5888	CG5888	CG5888	34980	4888 // transmembrane receptor activity // inferred from sequence or structural similarity /// 4888 // transmembrane receptor activity // inferred from sequence similarity	---	---	IPR001611 // Leucine-rich repeat // 0.093 /// IPR001611 // Leucine-rich repeat // 9.1E-4
4229	145428_at	0.463928	0.799561	6.22268	6.14e-07	6.33e-06	5.25423	FBgn0031115	CG11710	CG11710	CG11710	33044	3712 // transcription cofactor activity // inferred from electronic annotation /// 16922 // ligand-dependent nuclear receptor binding // inferred from sequence or structural similarity /// 5515 // protein binding // inferred from physical interaction /// 8270 // zinc ion binding // inferred from electronic annotation /// 30528 // transcription regulator activity // inferred from electronic annota…	6357 // regulation of transcription from RNA polymerase II promoter // inferred from electronic annotation /// 45449 // regulation of transcription // inferred from electronic annotation	5634 // nucleus // inferred from electronic annotation	IPR009349 // Putative zinc finger, C2HC5-type // 4.5E-36
7606	148805_at	0.462373	2.07622	3.70957	0.000800531	0.00355707	-1.85412	FBgn0036502	CG7841	CG7841	CG7841	39672	---	---	---	---
5519	146718_at	0.461858	1.36758	7.79529	7.71e-09	1.16e-07	9.66539	FBgn0033139	CG12837	Tsp42Er	Tetraspanin 42Er	35629	5057 // receptor signaling protein activity // inferred from electronic annotation	7398 // ectoderm development // inferred from electronic annotation /// 7399 // nervous system development // inferred from electronic annotation /// 19226 // transmission of nerve impulse // inferred from electronic annotation	16021 // integral to membrane // inferred from sequence or structural similarity /// 16021 // integral to membrane // inferred from sequence similarity	IPR000301 // CD9/CD37/CD63 antigen // 4.1E-46
11831	153030_at	0.46166	2.29827	3.42963	0.00170834	0.00670038	-2.58575	FBgn0036663	CG9674	CG9674	CG9674	39878	4355 // glutamate synthase (NADPH) activity // inferred from sequence or structural similarity /// 4497 // monooxygenase activity // inferred from electronic annotation /// 15036 // disulfide oxidoreductase activity // inferred from electronic annotation /// 5515 // protein binding // inferred from physical interaction /// 16491 // oxidoreductase activity // inferred from electronic annotation //…	5975 // carbohydrate metabolism // inferred from electronic annotation /// 6118 // electron transport // inferred from electronic annotation /// 6537 // glutamate biosynthesis // inferred from electronic annotation /// 6807 // nitrogen compound metabolism // inferred from electronic annotation /// 8652 // amino acid biosynthesis // inferred from electronic annotation /// 8152 // metabolism // inf…	---	IPR002489 // Protein of unknown function DUF14 // 8.0E-89 /// IPR001327 // FAD-dependent pyridine nucleotide-disulphide oxidoreductase // 1.1E-24 /// IPR002932 // Ferredoxin-dependent glutamate synthase // 1.3E-35 /// IPR006981 // Glutamate synthase amidotransferase domain // 1.0E-126 /// IPR002489 // Protein of unknown function DUF14 // 8.0E-89 /// IPR001327 // FAD-dependent pyridine nucleotide-…
12634	153833_at	0.461575	2.33482	7.70521	9.84e-09	1.45e-07	9.41918	FBgn0029873	CG3918	CG3918	CG3918	31585	5515 // protein binding // inferred from physical interaction /// 3676 // nucleic acid binding // inferred from electronic annotation /// 8270 // zinc ion binding // inferred from electronic annotation	---	---	---
12644	153843_at	0.46148	2.79845	6.19682	6.61e-07	6.79e-06	5.1801	FBgn0026620	CG9765	tacc	transforming acidic coiled-coil protein	40589	5515 // protein binding // inferred from physical interaction /// 8017 // microtubule binding // traceable author statement	226 // microtubule cytoskeleton organization and biogenesis // inferred from mutant phenotype /// 7026 // negative regulation of microtubule depolymerization // non-traceable author statement /// 7026 // negative regulation of microtubule depolymerization // traceable author statement /// 7052 // mitotic spindle organization and biogenesis // traceable author statement /// 7067 // mitosis // infe…	235 // astral microtubule // traceable author statement /// 242 // pericentriolar material // non-traceable author statement /// 5813 // centrosome // inferred from direct assay /// 5813 // centrosome // traceable author statement /// 5876 // spindle microtubule // traceable author statement	NULL // NULL // 8.0E-125 /// NULL // NULL // 8.0E-125 /// NULL // NULL // 8.0E-125 /// NULL // NULL // 8.0E-125 /// NULL // NULL // 8.0E-125
6299	147498_at	0.461464	2.58539	5.67078	2.99e-06	2.63e-05	3.66715	FBgn0012051	CG7563	CalpA	Calpain-A	37232	4198 // calpain activity // non-traceable author statement /// 5509 // calcium ion binding // inferred from electronic annotation /// 5516 // calmodulin binding // inferred from electronic annotation /// 5515 // protein binding // inferred from physical interaction /// 4198 // calpain activity // inferred from direct assay /// 4197 // cysteine-type endopeptidase activity // inferred from electron…	6508 // proteolysis // inferred from electronic annotation /// 16540 // protein autoprocessing // traceable author statement /// 19538 // protein metabolism // inferred from electronic annotation /// 30036 // actin cytoskeleton organization and biogenesis // non-traceable author statement /// 6508 // proteolysis // inferred from direct assay	5737 // cytoplasm // non-traceable author statement /// 5622 // intracellular // inferred from direct assay /// 15629 // actin cytoskeleton // inferred from direct assay /// 43025 // cell soma // inferred from direct assay /// 5622 // intracellular // inferred from electronic annotation	IPR001300 // Peptidase C2, calpain // 1.0E-126 /// IPR001300 // Peptidase C2, calpain // 7.3E-107
1358	142557_at	0.461446	2.12001	5.98889	1.2e-06	1.15e-05	4.58309	FBgn0042083	CG3267	CG3267	CG3267	59261	4075 // biotin carboxylase activity // inferred from electronic annotation /// 4485 // methylcrotonoyl-CoA carboxylase activity // inferred from sequence or structural similarity /// 4658 // propionyl-CoA carboxylase activity // non-traceable author statement /// 16421 // CoA carboxylase activity // inferred from sequence or structural similarity /// 16874 // ligase activity // inferred from elec…	6550 // isoleucine catabolism // non-traceable author statement /// 6551 // leucine metabolism // inferred from sequence or structural similarity /// 6567 // threonine catabolism // non-traceable author statement /// 6574 // valine catabolism // non-traceable author statement /// 6633 // fatty acid biosynthesis // inferred from electronic annotation /// 7563 // regulation of eclosion // inferred …	5759 // mitochondrial matrix // inferred from sequence or structural similarity /// 9343 // biotin carboxylase complex // inferred from electronic annotation /// 5739 // mitochondrion // inferred from electronic annotation /// 5759 // mitochondrial matrix // inferred from sequence similarity	IPR000022 // Carboxyl transferase // 1.0E-126
12185	153384_at	0.461216	1.5114	5.74515	2.41e-06	2.17e-05	3.88143	FBgn0031695	CG14031	Cyp4ac3	Cyp4ac3	33756	4497 // monooxygenase activity // inferred from electronic annotation /// 16491 // oxidoreductase activity // inferred from electronic annotation /// 5506 // iron ion binding // inferred from electronic annotation /// 20037 // heme binding // inferred from electronic annotation /// 46872 // metal ion binding // inferred from electronic annotation	6118 // electron transport // inferred from electronic annotation	5792 // microsome // non-traceable author statement /// 16020 // membrane // non-traceable author statement /// 5783 // endoplasmic reticulum // inferred from electronic annotation /// 5792 // microsome // inferred from electronic annotation /// 16020 // membrane // inferred from electronic annotation	IPR001128 // Cytochrome P450 // 1.5E-98
11996	153195_at	0.460743	2.83323	6.60711	2.06e-07	2.34e-06	6.35153	FBgn0014930	CG2846	CG2846	CG2846	40936	8531 // riboflavin kinase activity // inferred from sequence or structural similarity /// 287 // magnesium ion binding // inferred from electronic annotation /// 8270 // zinc ion binding // inferred from electronic annotation /// 8531 // riboflavin kinase activity // inferred from electronic annotation /// 16301 // kinase activity // inferred from electronic annotation /// 16740 // transferase ac…	9231 // riboflavin biosynthesis // inferred from sequence or structural similarity /// 9231 // riboflavin biosynthesis // inferred from electronic annotation /// 9231 // riboflavin biosynthesis // inferred from sequence similarity	5737 // cytoplasm // inferred from sequence or structural similarity /// 5737 // cytoplasm // inferred from sequence similarity	IPR002606 // Riboflavin kinase / FAD synthetase // 2.3E-43
8457	149656_at	0.460178	0.852608	7.01494	6.56e-08	8.32e-07	7.50401	FBgn0037852	CG6608	CG6608	CG6608	41316	5386 // carrier activity // inferred from sequence or structural similarity /// 5488 // binding // inferred from electronic annotation /// 5515 // protein binding // inferred from physical interaction /// 5215 // transporter activity // inferred from electronic annotation /// 5386 // carrier activity // inferred from sequence similarity	6812 // cation transport // inferred from electronic annotation /// 6810 // transport // inferred from electronic annotation	5740 // mitochondrial envelope // inferred from sequence or structural similarity /// 5743 // mitochondrial inner membrane // inferred from electronic annotation /// 16020 // membrane // inferred from electronic annotation /// 16021 // integral to membrane // inferred from electronic annotation /// 5740 // mitochondrial envelope // inferred from sequence similarity	IPR001993 // Mitochondrial substrate carrier // 2.6E-25 /// IPR001993 // Mitochondrial substrate carrier // 1.3E-23 /// IPR001993 // Mitochondrial substrate carrier // 2.9E-29
1579	142778_at	0.459581	0.845676	4.91121	2.68e-05	0.000187006	1.48308	FBgn0013432	CG3717	bcn92	bcn92	31186	16651 // oxidoreductase activity, acting on NADH or NADPH // inferred from electronic annotation	6118 // electron transport // inferred from electronic annotation	5743 // mitochondrial inner membrane // inferred from electronic annotation	IPR008011 // Complex 1 LYR protein // 1.9E-23
780	141979_r_at	0.458838	2.94599	3.21017	0.00305132	0.01085	-3.14089	---	---	---	---	---	---	---	---	---
10087	151286_at	0.458804	1.67749	7.16668	4.3e-08	5.63e-07	7.92912	FBgn0040812	CG8750	CG8750	CG8750	50285	5515 // protein binding // inferred from physical interaction	---	---	---
9367	150566_at	0.458273	1.37082	5.63001	3.36e-06	2.93e-05	3.54965	FBgn0039299	CG11854	CG11854	CG11854	43037	---	---	---	IPR004272 // Odorant binding protein // 2.9E-58
13905	155104_at	0.457592	2.35473	5.67467	2.96e-06	2.61e-05	3.67834	FBgn0034451	CG11242	CG11242	CG11242	37244	5200 // structural constituent of cytoskeleton // inferred from electronic annotation /// 42623 // ATPase activity, coupled // inferred from electronic annotation	6457 // protein folding // inferred from electronic annotation /// 7010 // cytoskeleton organization and biogenesis // inferred from electronic annotation	5856 // cytoskeleton // inferred from sequence or structural similarity /// 5856 // cytoskeleton // inferred from sequence similarity	IPR000938 // CAP-Gly domain // 1.7E-33
1074	142273_at	0.45739	0.944876	2.87937	0.00711038	0.0216705	-3.9412	FBgn0035567	CG7514	CG7514	CG7514	38571	5386 // carrier activity // inferred from sequence or structural similarity /// 5488 // binding // inferred from electronic annotation /// 15367 // oxoglutarate:malate antiporter activity // inferred from sequence or structural similarity /// 5515 // protein binding // inferred from physical interaction /// 5215 // transporter activity // inferred from electronic annotation /// 5386 // carrier ac…	6812 // cation transport // inferred from electronic annotation /// 6839 // mitochondrial transport // inferred from sequence or structural similarity /// 15742 // alpha-ketoglutarate transport // inferred from sequence or structural similarity /// 15743 // malate transport // inferred from sequence or structural similarity /// 6810 // transport // inferred from electronic annotation /// 6839 // …	5740 // mitochondrial envelope // inferred from sequence or structural similarity /// 5743 // mitochondrial inner membrane // inferred from sequence or structural similarity /// 5743 // mitochondrial inner membrane // inferred from electronic annotation /// 16020 // membrane // inferred from electronic annotation /// 16021 // integral to membrane // inferred from electronic annotation /// 5740 //…	IPR001993 // Mitochondrial substrate carrier // 4.7E-26 /// IPR001993 // Mitochondrial substrate carrier // 3.4E-28 /// IPR001993 // Mitochondrial substrate carrier // 6.6E-26
666	141865_r_at	0.457079	5.40867	2.66565	0.0120247	0.0330132	-4.43123	---	---	---	---	---	---	---	---	---
13973	AFFX-BioDn-5_at	0.456557	1.89914	3.8457	0.000550317	0.00261265	-1.49018	---	---	---	---	---	4015 // adenosylmethionine-8-amino-7-oxononanoate transaminase activity // inferred from electronic annotation /// 8483 // transaminase activity // inferred from electronic annotation /// 16740 // transferase activity // inferred from electronic annotation /// 30170 // pyridoxal phosphate binding // inferred from electronic annotation /// 3824 // catalytic activity // inferred from electronic ann…	9102 // biotin biosynthesis // inferred from electronic annotation /// 8152 // metabolism // inferred from electronic annotation /// 9058 // biosynthesis // inferred from electronic annotation /// 9236 // cobalamin biosynthesis // inferred from electronic annotation	---	---
7442	148641_at	0.456508	3.04063	3.95425	0.000407121	0.00201813	-1.19659	FBgn0022709	CG17146	Adk1	Adenylate kinase-1	39396	4017 // adenylate kinase activity // non-traceable author statement /// 4849 // uridine kinase activity // inferred from sequence or structural similarity /// 5524 // ATP binding // inferred from electronic annotation /// 4017 // adenylate kinase activity // inferred from electronic annotation /// 16301 // kinase activity // inferred from electronic annotation /// 16740 // transferase activity //…	6144 // purine base metabolism // inferred from electronic annotation /// 6206 // pyrimidine base metabolism // inferred from electronic annotation /// 46034 // ATP metabolism // inferred from electronic annotation /// 6139 // nucleobase, nucleoside, nucleotide and nucleic acid metabolism // inferred from electronic annotation	5737 // cytoplasm // inferred from electronic annotation	IPR000850 // Adenylate kinase // 2.4E-64 /// IPR000850 // Adenylate kinase // 2.4E-64
10133	151332_r_at	0.4562	3.85493	2.85433	0.00756877	0.022758	-3.99978	---	---	---	---	---	---	---	---	---
10552	151751_at	0.455942	3.64096	3.99214	0.000366287	0.00184394	-1.09345	FBgn0033739	CG8529	Dyb	Dystrobrevin-like	36362	3779 // actin binding // inferred from electronic annotation /// 5200 // structural constituent of cytoskeleton // inferred from electronic annotation /// 8092 // cytoskeletal protein binding // inferred from sequence or structural similarity /// 8270 // zinc ion binding // inferred from electronic annotation /// 8307 // structural constituent of muscle // inferred from sequence or structural sim…	6936 // muscle contraction // inferred from electronic annotation /// 7010 // cytoskeleton organization and biogenesis // inferred from electronic annotation /// 7018 // microtubule-based movement // inferred from electronic annotation /// 7263 // nitric oxide mediated signal transduction // inferred from electronic annotation /// 7274 // neuromuscular synaptic transmission // inferred from elect…	5874 // microtubule // inferred from electronic annotation /// 16010 // dystrophin-associated glycoprotein complex // inferred from sequence or structural similarity /// 16014 // dystrobrevin complex // inferred from sequence or structural similarity /// 16014 // dystrobrevin complex // non-traceable author statement /// 16010 // dystrophin-associated glycoprotein complex // inferred from sequenc…	IPR000433 // Zn-finger, ZZ type // 1.4E-8 /// IPR000433 // Zn-finger, ZZ type // 1.4E-8
11709	152908_at	0.454972	1.3809	6.02463	1.08e-06	1.06e-05	4.68583	FBgn0037275	CG14655	CG14655	CG14655	40594	3676 // nucleic acid binding // inferred from electronic annotation /// 8270 // zinc ion binding // inferred from electronic annotation /// 30528 // transcription regulator activity // inferred from electronic annotation /// 46872 // metal ion binding // inferred from electronic annotation	6139 // nucleobase, nucleoside, nucleotide and nucleic acid metabolism // inferred from electronic annotation /// 6357 // regulation of transcription from RNA polymerase II promoter // inferred from electronic annotation /// 6366 // transcription from RNA polymerase II promoter // inferred from electronic annotation /// 8283 // cell proliferation // inferred from electronic annotation	5634 // nucleus // inferred from electronic annotation	IPR007087 // Zn-finger, C2H2 type // 1.6E-5 /// IPR007087 // Zn-finger, C2H2 type // 4.4E-5 /// IPR007087 // Zn-finger, C2H2 type // 7.3E-6 /// IPR007087 // Zn-finger, C2H2 type // 9.3E-6
2135	143334_at	0.454691	2.00087	5.38275	6.87e-06	5.51e-05	2.83709	FBgn0003328	CG8095	scb	scab	36692	4872 // receptor activity // inferred from physical interaction /// 4872 // receptor activity // inferred from sequence or structural similarity /// 4872 // receptor activity // non-traceable author statement /// 4872 // receptor activity // traceable author statement /// 5055 // laminin receptor activity // non-traceable author statement /// 5198 // structural molecule activity // non-traceable …	7155 // cell adhesion // inferred from physical interaction /// 7155 // cell adhesion // inferred from sequence or structural similarity /// 7155 // cell adhesion // non-traceable author statement /// 7155 // cell adhesion // traceable author statement /// 7157 // heterophilic cell adhesion // traceable author statement /// 7160 // cell-matrix adhesion // traceable author statement /// 7391 // do…	5886 // plasma membrane // inferred from sequence or structural similarity /// 5925 // focal adhesion // inferred from sequence or structural similarity /// 8305 // integrin complex // inferred from sequence or structural similarity /// 8305 // integrin complex // non-traceable author statement /// 16021 // integral to membrane // non-traceable author statement /// 8305 // integrin complex // inf…	IPR000413 // Integrins alpha chain // 5.0E-8 /// IPR000413 // Integrins alpha chain // 8.7E-10 /// IPR000413 // Integrins alpha chain // 1.9E-5
13932	155131_at	0.454686	1.14484	8.49314	1.21e-09	2.16e-08	11.5403	FBgn0037719	CG9424	bocksbeutel	bocksbeutel	41162	5515 // protein binding // inferred from physical interaction	---	5635 // nuclear envelope // inferred from electronic annotation	---
9632	150831_at	0.45416	2.99173	5.96253	1.29e-06	1.23e-05	4.50728	FBgn0039678 /// FBgn0068109	CG18111	Obp99a /// DyakObp99a	Odorant-binding protein 99a /// Obp99a	43488	5549 // odorant binding // inferred from sequence or structural similarity /// 5549 // odorant binding // non-traceable author statement /// 5515 // protein binding // inferred from physical interaction /// 5549 // odorant binding // inferred from electronic annotation /// 5549 // odorant binding // inferred from sequence similarity	6810 // transport // inferred from electronic annotation /// 7606 // sensory perception of chemical stimulus // inferred from sequence or structural similarity /// 19236 // response to pheromone // inferred from sequence or structural similarity /// 42048 // olfactory behavior // inferred from sequence or structural similarity /// 7608 // sensory perception of smell // inferred from electronic an…	5576 // extracellular region // inferred from sequence or structural similarity /// 5576 // extracellular region // inferred from sequence similarity	IPR006170 // Pheromone/general odorant binding protein, PBP/GOBP // 1.2E-33
1127	142326_at	0.454018	1.74773	4.449	0.000100807	0.000605617	0.172228	FBgn0032519	CG16957	CG16957	CG16957	34755	---	---	---	IPR001199 // Cytochrome b5 // 9.7E-18
[truncated: 942 more rows]
