# Supplementary material for: Gene expression changes in response to aging compared to heat stress, oxidative stress and ionizing radiation in Drosophila melanogaster
Source: Aging (Albany NY). 2012 Nov 30;4(11):768–89. doi: 10.18632/aging.100499 (PMC3560439; doi:10.18632/aging.100499)
Supplement: Supplementary file 10 [file aging-04-768-s010.xlsx]

## Sheet: TableS4f.O2down
Table S4f. O2 down
ID	M	A	t	P.Value	adj.P.Val	B	FlyBase	Ensembl	Gene.Symbol	Gene.Title	Entrez.Gene	Gene.Ontology.Molecular.Function	Gene.Ontology.Biological.Process	Gene.Ontology.Cellular.Component	InterPro
8993	150192_at	-2.32753	1.93784	-33.6125	3.22745e-26	1.24525e-22	49.7569	FBgn0038701	CG18493	CG18493	CG18493	42319	8233 // peptidase activity // inferred from electronic annotation /// 8236 // serine-type peptidase activity // inferred from electronic annotation /// 3824 // catalytic activity // inferred from electronic annotation	6508 // proteolysis // inferred from electronic annotation /// 19538 // protein metabolism // inferred from electronic annotation	5764 // lysosome // inferred from electronic annotation	IPR008758 // Peptidase S28 // 1.0E-126
9377	150576_at	-2.24303	2.6363	-34.4781	1.48077e-26	1.24525e-22	50.5063	FBgn0039312	CG10514	CG10514	CG10514	43052	5515 // protein binding // inferred from physical interaction /// 16301 // kinase activity // inferred from electronic annotation /// 16740 // transferase activity // inferred from electronic annotation	---	---	IPR004119 // Protein of unknown function DUF227 // 2.2E-121
10161	151360_at	-2.70813	2.83051	-33.0656	5.33296e-26	1.24525e-22	49.2726	FBgn0040887	CG33254	CG33254	CG33254	2768869	---	---	---	---
227	141426_at	-3.06015	2.25709	-31.9947	1.45895e-25	2.2711e-22	48.2992	FBgn0036996	CG5932	CG5932	CG5932	40267	4806 // triacylglycerol lipase activity // inferred from sequence or structural similarity /// 3824 // catalytic activity // inferred from electronic annotation /// 16789 // carboxylic ester hydrolase activity // inferred from electronic annotation /// 4806 // triacylglycerol lipase activity // inferred from sequence similarity	6629 // lipid metabolism // inferred from electronic annotation /// 16042 // lipid catabolism // inferred from electronic annotation	---	IPR000073 // Alpha/beta hydrolase fold // 2.2E-14 /// IPR006693 // Ab-hydrolase associated lipase region // 1.1E-21
1203	142402_at	-2.49041	1.5392	-31.4304	2.51173e-25	3.19903e-22	47.7722	FBgn0037678	CG16749	CG16749	CG16749	41111	4252 // serine-type endopeptidase activity // inferred from sequence or structural similarity /// 4252 // serine-type endopeptidase activity // non-traceable author statement /// 4263 // chymotrypsin activity // inferred from electronic annotation /// 4295 // trypsin activity // inferred from electronic annotation /// 4252 // serine-type endopeptidase activity // inferred from electronic annotati…	6508 // proteolysis // non-traceable author statement /// 6508 // proteolysis // inferred from electronic annotation	---	IPR001254 // Peptidase S1, chymotrypsin // 5.2E-67
5919	147118_at	-3.67824	3.41103	-30.7412	4.93773e-25	4.61184e-22	47.115	FBgn0033774	CG12374	CG12374	CG12374	36410	4182 // carboxypeptidase A activity // inferred from sequence or structural similarity /// 5515 // protein binding // inferred from physical interaction /// 4180 // carboxypeptidase activity // inferred from electronic annotation /// 4182 // carboxypeptidase A activity // inferred from electronic annotation /// 4182 // carboxypeptidase A activity // inferred from sequence similarity	6508 // proteolysis // inferred from electronic annotation	---	IPR000834 // Peptidase M14, carboxypeptidase A // 4.3E-52
7055	148254_at	-3.42173	1.21933	-30.8409	4.47406e-25	4.61184e-22	47.211	FBgn0035666	CG6580	Jon65Aii	Jonah 65Aii	38684	4252 // serine-type endopeptidase activity // inferred from sequence or structural similarity /// 4252 // serine-type endopeptidase activity // non-traceable author statement /// 4263 // chymotrypsin activity // inferred from electronic annotation /// 4295 // trypsin activity // inferred from electronic annotation /// 4252 // serine-type endopeptidase activity // inferred from sequence similarity	6508 // proteolysis // non-traceable author statement	---	IPR001254 // Peptidase S1, chymotrypsin // 8.7E-43
2628	143827_at	-2.58741	2.10335	-30.2698	7.90554e-25	6.5151e-22	46.6565	FBgn0015586	CG3801	Acp76A	Accessory gland-specific peptide 76A	40078	4867 // serine-type endopeptidase inhibitor activity // inferred from sequence or structural similarity /// 42562 // hormone binding // inferred from sequence or structural similarity /// 4867 // serine-type endopeptidase inhibitor activity // inferred from electronic annotation /// 4867 // serine-type endopeptidase inhibitor activity // inferred from sequence similarity /// 42562 // hormone bind…	45861 // negative regulation of proteolysis // inferred from sequence or structural similarity /// 45861 // negative regulation of proteolysis // inferred from sequence similarity	---	---
4817	146016_at	-2.62559	3.05477	-30.2949	7.70848e-25	6.5151e-22	46.6811	FBgn0028987	CG8137	Spn2	Serine protease inhibitor 2	49807	4867 // serine-type endopeptidase inhibitor activity // inferred from sequence or structural similarity /// 4867 // serine-type endopeptidase inhibitor activity // non-traceable author statement /// 42562 // hormone binding // inferred from sequence or structural similarity /// 4867 // serine-type endopeptidase inhibitor activity // inferred from electronic annotation /// 8233 // peptidase activi…	6508 // proteolysis // inferred from electronic annotation /// 45861 // negative regulation of proteolysis // inferred from sequence or structural similarity /// 45861 // negative regulation of proteolysis // inferred from sequence similarity	---	IPR000215 // Serpin // 1.2E-112
7133	148332_at	-2.32832	1.67366	-30.1581	8.84644e-25	6.63855e-22	46.5468	FBgn0035779	CG8562	CG8562	CG8562	38828	4181 // metallocarboxypeptidase activity // inferred from sequence or structural similarity /// 4182 // carboxypeptidase A activity // inferred from electronic annotation /// 4181 // metallocarboxypeptidase activity // inferred from sequence similarity	6508 // proteolysis // inferred from electronic annotation	---	IPR000834 // Peptidase M14, carboxypeptidase A // 1.1E-66
11567	152766_at	-2.21351	1.32725	-29.5635	1.621e-24	1.13551e-21	45.9556	FBgn0002563	CG4178	Lsp1	Larval serum protein 1	33274	5344 // oxygen transporter activity // inferred from electronic annotation /// 45735 // nutrient reservoir activity // non-traceable author statement /// 45735 // nutrient reservoir activity // inferred from electronic annotation	6810 // transport // inferred from electronic annotation	5576 // extracellular region // non-traceable author statement /// 5616 // larval serum protein complex // inferred from direct assay	IPR000896 // Arthropod hemocyanin/insect LSP // 8.2E-98 /// IPR005204 // Hemocyanin, N-terminal // 8.4E-38 /// IPR005203 // Hemocyanin, C-terminal // 1.8E-109
4967	146166_at	-2.15646	1.79497	-29.4536	1.81524e-24	1.15597e-21	45.8449	FBgn0032265	CG18301	CG18301	CG18301	34451	16298 // lipase activity // inferred from electronic annotation /// 16787 // hydrolase activity // inferred from electronic annotation /// 5515 // protein binding // inferred from physical interaction /// 3824 // catalytic activity // inferred from electronic annotation /// 16789 // carboxylic ester hydrolase activity // inferred from electronic annotation	6629 // lipid metabolism // inferred from electronic annotation /// 16042 // lipid catabolism // inferred from electronic annotation	---	IPR000073 // Alpha/beta hydrolase fold // 1.5E-13 /// IPR006693 // Ab-hydrolase associated lipase region // 2.9E-30
9170	150369_at	-2.45905	1.98564	-28.248	6.45111e-24	3.76584e-21	44.6028	FBgn0038973	CG18594	CG18594	CG18594	42644	19207 // kinase regulator activity // inferred from electronic annotation /// 19210 // kinase inhibitor activity // inferred from electronic annotation /// 5515 // protein binding // inferred from physical interaction	7165 // signal transduction // inferred from electronic annotation	---	IPR008914 // PEBP // 1.9E-57
3669	144868_at	-1.30062	2.09821	-28.0559	7.93178e-24	4.27401e-21	44.4	FBgn0030292	CG11752	CG11752	CG11752	32076	---	---	---	---
11066	152265_at	-2.55711	2.63127	-27.7015	1.16528e-23	5.62949e-21	44.022	FBgn0039313	CG11892	CG11892	CG11892	43053	5515 // protein binding // inferred from physical interaction /// 16301 // kinase activity // inferred from electronic annotation /// 16740 // transferase activity // inferred from electronic annotation	---	---	IPR004119 // Protein of unknown function DUF227 // 5.1E-119
8411	149610_at	-2.32255	1.20336	-26.6121	3.9148e-23	1.75152e-20	42.8286	FBgn0037782	CG12813	CG12813	CG12813	41232	---	---	---	IPR003172 // E1 protein and Def2/Der2 allergen // 4.6E-40
11314	152513_at	-2.26288	2.67424	-25.7767	1.02284e-22	4.21472e-20	41.8801	FBgn0039311	CG10513	CG10513	CG10513	43051	16301 // kinase activity // inferred from electronic annotation /// 16740 // transferase activity // inferred from electronic annotation	---	---	IPR004119 // Protein of unknown function DUF227 // 5.7E-122
12529	153728_at	-1.59199	2.77892	-25.51	1.39821e-22	5.29429e-20	41.5709	FBgn0012037 /// FBgn0082762	CG8827	Ance /// DsimAnce	Angiotensin converting enzyme /// Ance	34805	4246 // peptidyl-dipeptidase A activity // inferred from direct assay /// 4246 // peptidyl-dipeptidase A activity // non-traceable author statement /// 4246 // peptidyl-dipeptidase A activity // traceable author statement /// 8241 // peptidyl-dipeptidase activity // inferred from sequence or structural similarity /// 8270 // zinc ion binding // non-traceable author statement /// 4180 // carboxype…	6508 // proteolysis // inferred from electronic annotation /// 7289 // spermatid nuclear differentiation // inferred from mutant phenotype /// 7291 // sperm individualization // inferred from mutant phenotype /// 46698 // metamorphosis (sensu Insecta) // inferred from expression pattern	5576 // extracellular region // non-traceable author statement /// 16020 // membrane // inferred from electronic annotation	IPR001548 // Peptidase M2, peptidyl-dipeptidase A // 1.0E-126
5953	147152_at	-2.0589	1.21922	-25.4027	1.58691e-22	5.85067e-20	41.4456	FBgn0019928	CG4812	Ser8	Ser8	36489	4263 // chymotrypsin activity // inferred from electronic annotation /// 4295 // trypsin activity // inferred from sequence or structural similarity /// 4295 // trypsin activity // non-traceable author statement /// 8236 // serine-type peptidase activity // inferred from sequence or structural similarity /// 4252 // serine-type endopeptidase activity // inferred from electronic annotation /// 823…	6508 // proteolysis // non-traceable author statement /// 6508 // proteolysis // inferred from electronic annotation	---	IPR001254 // Peptidase S1, chymotrypsin // 2.4E-86
5388	146587_at	-2.88066	2.22396	-24.9359	2.76866e-22	9.69724e-20	40.8943	FBgn0032947	CG17571	CG17571	CG17571	35409	4252 // serine-type endopeptidase activity // inferred from sequence or structural similarity /// 4263 // chymotrypsin activity // inferred from electronic annotation /// 4295 // trypsin activity // non-traceable author statement /// 4252 // serine-type endopeptidase activity // inferred from sequence similarity	6508 // proteolysis // non-traceable author statement	---	IPR001254 // Peptidase S1, chymotrypsin // 3.6E-83
2040	143239_at	-3.12562	2.02925	-24.5266	4.54555e-22	1.46159e-19	40.4026	FBgn0002565	CG6806	Lsp2	Larval serum protein 2	45326	4182 // carboxypeptidase A activity // inferred from electronic annotation /// 5344 // oxygen transporter activity // inferred from electronic annotation /// 45735 // nutrient reservoir activity // non-traceable author statement /// 5515 // protein binding // inferred from physical interaction /// 45735 // nutrient reservoir activity // inferred from electronic annotation	6508 // proteolysis // inferred from electronic annotation /// 6810 // transport // inferred from electronic annotation	5576 // extracellular region // non-traceable author statement /// 5616 // larval serum protein complex // inferred from direct assay	IPR000896 // Arthropod hemocyanin/insect LSP // 4.0E-48 /// IPR005204 // Hemocyanin, N-terminal // 1.6E-16 /// IPR005203 // Hemocyanin, C-terminal // 1.1E-74
5816	147015_at	-1.39941	1.58957	-24.474	4.84758e-22	1.50921e-19	40.3388	FBgn0043471	CG12388	Try	Try	36215	4252 // serine-type endopeptidase activity // non-traceable author statement /// 4263 // chymotrypsin activity // inferred from electronic annotation /// 4295 // trypsin activity // inferred from electronic annotation	6508 // proteolysis // inferred from electronic annotation	---	IPR001254 // Peptidase S1, chymotrypsin // 4.3E-67
4904	146103_at	-2.73097	2.63932	-24.0749	7.92624e-22	2.41406e-19	39.8506	FBgn0032144	CG17633	CG17633	CG17633	34297	4182 // carboxypeptidase A activity // inferred from sequence or structural similarity /// 4180 // carboxypeptidase activity // inferred from electronic annotation /// 4182 // carboxypeptidase A activity // inferred from electronic annotation /// 4182 // carboxypeptidase A activity // inferred from sequence similarity	6508 // proteolysis // inferred from electronic annotation	---	IPR000834 // Peptidase M14, carboxypeptidase A // 3.8E-83
210	141409_at	-2.13728	1.36587	-23.8169	1.09345e-21	3.19151e-19	39.5308	FBgn0039154	CG6164	CG6164	CG6164	42864	5515 // protein binding // inferred from physical interaction	---	---	IPR003172 // E1 protein and Def2/Der2 allergen // 2.3E-29
2802	144001_at	-1.50725	0.683854	-23.7038	1.26034e-21	3.26989e-19	39.3896	FBgn0023541	CG3540	Cyp4d14	Cyp4d14	45706	4497 // monooxygenase activity // inferred from electronic annotation /// 16491 // oxidoreductase activity // inferred from electronic annotation	6118 // electron transport // inferred from electronic annotation	5792 // microsome // non-traceable author statement /// 16020 // membrane // non-traceable author statement	IPR001128 // Cytochrome P450 // 7.8E-117
5535	146734_at	-1.6607	1.21963	-23.7587	1.17627e-21	3.26989e-19	39.4582	FBgn0033164	CG11112	CG11112	CG11112	35658	---	---	---	---
7354	148553_at	-1.78489	1.29713	-23.7219	1.23188e-21	3.26989e-19	39.4123	FBgn0052072	CG32072	CG32072	CG32072	---	9922 // fatty acid elongase activity // inferred from direct assay /// 8415 // acyltransferase activity // inferred from electronic annotation	19368 // fatty acid elongation, unsaturated fatty acid // inferred from direct assay /// 42811 // pheromone biosynthesis // inferred from mutant phenotype /// 38 // very-long-chain fatty acid metabolism // inferred from sequence similarity /// 6633 // fatty acid biosynthesis // inferred from sequence similarity	16021 // integral to membrane // inferred from electronic annotation /// 5783 // endoplasmic reticulum // inferred from sequence similarity	IPR002076 // GNS1/SUR4 membrane protein // 1.2E-19 /// IPR002076 // GNS1/SUR4 membrane protein // 1.2E-19
8589	149788_at	-1.44624	2.09823	-23.5026	1.62507e-21	4.13951e-19	39.1367	FBgn0038067	CG11598	CG11598	CG11598	41554	4806 // triacylglycerol lipase activity // inferred from sequence or structural similarity /// 16298 // lipase activity // inferred from sequence or structural similarity /// 3824 // catalytic activity // inferred from electronic annotation /// 16787 // hydrolase activity // inferred from electronic annotation /// 16789 // carboxylic ester hydrolase activity // inferred from electronic annotation…	6629 // lipid metabolism // inferred from electronic annotation /// 6629 // lipid metabolism // inferred from sequence or structural similarity /// 16042 // lipid catabolism // inferred from electronic annotation /// 6629 // lipid metabolism // inferred from sequence similarity	---	IPR000073 // Alpha/beta hydrolase fold // 2.2E-14 /// IPR006693 // Ab-hydrolase associated lipase region // 3.7E-19 /// IPR000073 // Alpha/beta hydrolase fold // 2.2E-14 /// IPR006693 // Ab-hydrolase associated lipase region // 1.7E-20
1072	142271_at	-1.82919	2.56687	-23.3887	1.87836e-21	4.69924e-19	38.9926	FBgn0026314	CG6649	Ugt35b	UDP-glycosyltransferase 35b	41333	15020 // glucuronosyltransferase activity // inferred from sequence or structural similarity /// 15020 // glucuronosyltransferase activity // non-traceable author statement /// 16740 // transferase activity // inferred from electronic annotation /// 16757 // transferase activity, transferring glycosyl groups // inferred from electronic annotation /// 16758 // transferase activity, transferring he…	5976 // polysaccharide metabolism // inferred from electronic annotation /// 6952 // defense response // inferred from electronic annotation /// 8202 // steroid metabolism // inferred from electronic annotation /// 9636 // response to toxin // inferred from electronic annotation /// 8152 // metabolism // inferred from electronic annotation	---	IPR002213 // UDP-glucoronosyl/UDP-glucosyl transferase // 5.4E-93
8992	150191_at	-1.78414	1.62933	-23.2285	2.30496e-21	5.66536e-19	38.7889	FBgn0038700	CG3734	CG3734	CG3734	42318	8236 // serine-type peptidase activity // inferred from sequence or structural similarity /// 3824 // catalytic activity // inferred from electronic annotation /// 8233 // peptidase activity // inferred from electronic annotation /// 8236 // serine-type peptidase activity // inferred from electronic annotation /// 8236 // serine-type peptidase activity // inferred from sequence similarity	6508 // proteolysis // inferred from electronic annotation	5764 // lysosome // inferred from electronic annotation	IPR008758 // Peptidase S28 // 1.0E-126
5356	146555_at	-1.84076	2.73881	-23.1027	2.70903e-21	6.43279e-19	38.628	FBgn0028986	CG9334	Spn3	Serine protease inhibitor 3	49806	4867 // serine-type endopeptidase inhibitor activity // inferred from sequence or structural similarity /// 4867 // serine-type endopeptidase inhibitor activity // non-traceable author statement /// 4867 // serine-type endopeptidase inhibitor activity // inferred from electronic annotation /// 8233 // peptidase activity // inferred from electronic annotation /// 4867 // serine-type endopeptidase …	6508 // proteolysis // inferred from electronic annotation /// 45861 // negative regulation of proteolysis // inferred from sequence or structural similarity /// 45861 // negative regulation of proteolysis // inferred from sequence similarity	---	IPR000215 // Serpin // 1.4E-106
2673	143872_at	-1.90941	1.9203	-22.9818	3.16683e-21	7.39455e-19	38.4725	FBgn0016123	CG1462	Aph-4	Alkaline phosphatase 4	43671	4035 // alkaline phosphatase activity // inferred from sequence or structural similarity /// 4035 // alkaline phosphatase activity // non-traceable author statement /// 19204 // nucleotide phosphatase activity // inferred from electronic annotation /// 287 // magnesium ion binding // inferred from electronic annotation /// 4035 // alkaline phosphatase activity // inferred from electronic annotati…	1501 // skeletal development // inferred from electronic annotation /// 7399 // nervous system development // inferred from expression pattern /// 7498 // mesoderm development // inferred from electronic annotation /// 8152 // metabolism // inferred from electronic annotation /// 42045 // epithelial fluid transport // inferred from mutant phenotype	46658 // anchored to plasma membrane // inferred from sequence or structural similarity /// 16020 // membrane // inferred from electronic annotation /// 16021 // integral to membrane // inferred from electronic annotation /// 46658 // anchored to plasma membrane // inferred from sequence similarity	IPR001952 // Alkaline phosphatase // 3.0E-77 /// IPR001952 // Alkaline phosphatase // 9.8E-89
5011	146210_at	-1.41281	2.08489	-22.7577	4.23728e-21	9.73184e-19	38.1823	FBgn0032318	CG14072	CG14072	CG14072	34513	---	---	---	---
11451	152650_at	-1.23403	1.37422	-22.3823	6.94161e-21	1.54368e-18	37.69	FBgn0032495	CG16820	CG16820	CG16820	34730	---	---	---	IPR004272 // Odorant binding protein // 2.6E-44
8994	150193_at	-3.35413	2.98516	-22.2589	8.17773e-21	1.79016e-18	37.5264	FBgn0038702	CG3739	CG3739	CG3739	42320	8236 // serine-type peptidase activity // inferred from sequence or structural similarity /// 3824 // catalytic activity // inferred from electronic annotation /// 8236 // serine-type peptidase activity // inferred from electronic annotation /// 8236 // serine-type peptidase activity // inferred from sequence similarity	6508 // proteolysis // inferred from electronic annotation	---	IPR008758 // Peptidase S28 // 1.0E-126 /// IPR008758 // Peptidase S28 // 1.0E-126
7957	149156_at	-1.53226	2.17388	-21.8128	1.48875e-20	3.18162e-18	36.9281	FBgn0037038	CG11037	CG11037	CG11037	40317	4252 // serine-type endopeptidase activity // inferred from sequence or structural similarity /// 4263 // chymotrypsin activity // inferred from electronic annotation /// 4295 // trypsin activity // non-traceable author statement /// 4252 // serine-type endopeptidase activity // inferred from electronic annotation /// 4252 // serine-type endopeptidase activity // inferred from sequence similarity	6508 // proteolysis // non-traceable author statement /// 6508 // proteolysis // inferred from electronic annotation	---	IPR001254 // Peptidase S1, chymotrypsin // 6.4E-55
11243	152442_at	-1.86275	1.96775	-21.7047	1.72426e-20	3.6055e-18	36.7814	FBgn0051233	CG31233	CG31233	CG31233	42557	4179 // membrane alanyl aminopeptidase activity // inferred from sequence or structural similarity /// 4179 // membrane alanyl aminopeptidase activity // inferred from electronic annotation /// 4179 // membrane alanyl aminopeptidase activity // inferred from sequence similarity	6508 // proteolysis // inferred from electronic annotation	---	IPR001930 // Peptidase M1, membrane alanine aminopeptidase // 1.0E-126
7111	148310_i_at	-1.87901	1.30947	-21.6186	1.93887e-20	3.99465e-18	36.6641	FBgn0035744	CG8628	CG8628	CG8628	38783	62 // acyl-CoA binding // inferred from sequence or structural similarity /// 4857 // enzyme inhibitor activity // inferred from sequence or structural similarity /// 5386 // carrier activity // inferred from electronic annotation /// 50809 // diazepam binding // inferred from sequence or structural similarity /// 166 // nucleotide binding // inferred from electronic annotation /// 5524 // ATP bi…	6869 // lipid transport // inferred from electronic annotation /// 42049 // cell acyl-CoA homeostasis // inferred from sequence or structural similarity /// 1700 // embryonic development (sensu Insecta) // inferred from mutant phenotype /// 7399 // nervous system development // inferred from mutant phenotype /// 7411 // axon guidance // inferred from mutant phenotype /// 7413 // axonal fasciculat…	---	IPR000582 // Acyl-coA-binding protein, ACBP // 3.1E-32
4044	145243_at	-1.51905	1.64767	-21.554	2.11814e-20	4.30075e-18	36.5757	FBgn0030837	CG8661	CG8661	CG8661	32720	---	---	---	---
1834	143033_at	-1.57085	1.2656	-21.3901	2.65306e-20	5.3099e-18	36.3506	FBgn0001089	CG9092	Gal	galactosidase	33839	4565 // beta-galactosidase activity // inferred from direct assay /// 4565 // beta-galactosidase activity // inferred from sequence or structural similarity /// 4565 // beta-galactosidase activity // inferred from electronic annotation /// 4565 // beta-galactosidase activity // inferred from sequence similarity	5975 // carbohydrate metabolism // inferred from electronic annotation	5764 // lysosome // inferred from sequence or structural similarity /// 9341 // beta-galactosidase complex // inferred from electronic annotation /// 5764 // lysosome // inferred from sequence similarity	IPR001944 // Glycoside hydrolase, family 35 // 5.1E-100 /// IPR001944 // Glycoside hydrolase, family 35 // 2.3E-8
236	141435_at	-2.92586	2.45129	-21.2942	3.02868e-20	5.97631e-18	36.2181	FBgn0031249	CG11911	CG11911	CG11911	33206	4252 // serine-type endopeptidase activity // inferred from sequence or structural similarity /// 4263 // chymotrypsin activity // non-traceable author statement /// 4295 // trypsin activity // inferred from electronic annotation /// 4252 // serine-type endopeptidase activity // inferred from electronic annotation /// 8236 // serine-type peptidase activity // inferred from electronic annotation /…	6508 // proteolysis // non-traceable author statement /// 6508 // proteolysis // inferred from electronic annotation	---	IPR001254 // Peptidase S1, chymotrypsin // 1.6E-63
10938	152137_at	-1.70109	1.6169	-21.2025	3.43967e-20	6.69303e-18	36.0908	FBgn0039754	CG9747	CG9747	CG9747	43591	4768 // stearoyl-CoA 9-desaturase activity // inferred from electronic annotation /// 5506 // iron ion binding // inferred from electronic annotation /// 17105 // acyl-CoA delta11-desaturase activity // inferred from sequence or structural similarity /// 5515 // protein binding // inferred from physical interaction /// 16491 // oxidoreductase activity // inferred from electronic annotation /// 17…	6631 // fatty acid metabolism // inferred from electronic annotation /// 6633 // fatty acid biosynthesis // inferred from electronic annotation /// 8610 // lipid biosynthesis // inferred from electronic annotation	5783 // endoplasmic reticulum // inferred from electronic annotation /// 16020 // membrane // inferred from electronic annotation /// 16021 // integral to membrane // inferred from electronic annotation	IPR005804 // Fatty acid desaturase // 4.9E-80
5633	146832_at	-2.10817	1.56196	-21.0502	4.25305e-20	7.84016e-18	35.8784	FBgn0043575	CG14745	PGRP-SC2	PGRP-SC2	35862	8745 // N-acetylmuramoyl-L-alanine amidase activity // inferred from electronic annotation /// 42834 // peptidoglycan binding // inferred from sequence or structural similarity /// 42834 // peptidoglycan binding // non-traceable author statement /// 42834 // peptidoglycan binding // inferred from sequence similarity	6952 // defense response // non-traceable author statement /// 6955 // immune response // inferred from sequence or structural similarity /// 9253 // peptidoglycan catabolism // inferred from electronic annotation /// 9253 // peptidoglycan catabolism // inferred from sequence or structural similarity /// 45087 // innate immune response // inferred from sequence or structural similarity /// 6955 /…	5576 // extracellular region // inferred from sequence or structural similarity /// 5887 // integral to plasma membrane // non-traceable author statement /// 5576 // extracellular region // inferred from sequence similarity	IPR002502 // N-acetylmuramoyl-L-alanine amidase, family 2 // 5.6E-65
12061	153260_at	-1.39374	2.29434	-20.9147	5.14289e-20	9.3574e-18	35.6882	FBgn0026061	CG4123	Mipp1	Multiple inositol polyphosphate phosphatase 1	39841	3993 // acid phosphatase activity // inferred from electronic annotation /// 4437 // inositol or phosphatidylinositol phosphatase activity // inferred from sequence or structural similarity /// 4721 // phosphoprotein phosphatase activity // non-traceable author statement /// 4437 // inositol or phosphatidylinositol phosphatase activity // inferred from sequence similarity	---	---	---
2461	143660_at	-1.90652	1.51962	-20.8834	5.37409e-20	9.65269e-18	35.6441	FBgn0011555	CG12385	Try	Trypsin	36218	4263 // chymotrypsin activity // inferred from electronic annotation /// 4295 // trypsin activity // inferred from sequence or structural similarity /// 4295 // trypsin activity // non-traceable author statement /// 4252 // serine-type endopeptidase activity // inferred from electronic annotation /// 4295 // trypsin activity // inferred from electronic annotation /// 8233 // peptidase activity //…	6508 // proteolysis // non-traceable author statement /// 6508 // proteolysis // inferred from electronic annotation	5576 // extracellular region // non-traceable author statement	IPR001254 // Peptidase S1, chymotrypsin // 5.3E-85
11445	152644_at	-1.5378	1.57031	-20.8641	5.52193e-20	9.79268e-18	35.617	FBgn0038398	CG4979	sxe2	sex-specific enzyme 2	41954	17063 // phosphatidylserine-specific phospholipase A1 activity // inferred from sequence or structural similarity /// 3824 // catalytic activity // inferred from electronic annotation /// 17063 // phosphatidylserine-specific phospholipase A1 activity // inferred from sequence similarity	6629 // lipid metabolism // inferred from electronic annotation	---	IPR000734 // Lipase // 4.6E-21
3954	145153_at	-1.34553	1.60727	-20.7472	6.51345e-20	1.11285e-17	35.4516	FBgn0053173	CG33173	CG33173	CG33173	318910	166 // nucleotide binding // inferred from electronic annotation /// 5215 // transporter activity // inferred from sequence or structural similarity /// 5524 // ATP binding // inferred from electronic annotation /// 8061 // chitin binding // inferred from electronic annotation /// 42626 // ATPase activity, coupled to transmembrane movement of substances // inferred from sequence or structural sim…	6030 // chitin metabolism // inferred from electronic annotation /// 6810 // transport // inferred from sequence or structural similarity /// 6810 // transport // inferred from sequence similarity	5576 // extracellular region // inferred from electronic annotation /// 43190 // ATP-binding cassette (ABC) transporter complex // inferred from sequence or structural similarity /// 43190 // ATP-binding cassette (ABC) transporter complex // inferred from sequence similarity	IPR002557 // Chitin binding Peritrophin-A // 8.9E-19 /// IPR002557 // Chitin binding Peritrophin-A // 4.2E-15 /// IPR003439 // ABC transporter // 4.5E-25 /// IPR003439 // ABC transporter // 5.0E-21
6437	147636_at	-1.37637	2.13448	-20.6758	7.20693e-20	1.21649e-17	35.3502	FBgn0034662	CG13492	CG13492	CG13492	37487	4365 // glyceraldehyde-3-phosphate dehydrogenase (phosphorylating) activity // inferred from electronic annotation	6096 // glycolysis // inferred from electronic annotation	---	IPR008472 // Protein of unknown function DUF753 // 2.7E-8 /// IPR008472 // Protein of unknown function DUF753 // 3.2E-22 /// IPR008472 // Protein of unknown function DUF753 // 3.3E-50 /// IPR008472 // Protein of unknown function DUF753 // 6.2E-39 /// IPR008472 // Protein of unknown function DUF753 // 2.3E-5 /// IPR008472 // Protein of unknown function DUF753 // 1.0E-126 /// IPR008472 // Protein o…
9592	150791_at	-1.03509	0.531603	-20.4165	1.04372e-19	1.7203e-17	34.9791	FBgn0039611	CG14528	CG14528	CG14528	43410	4222 // metalloendopeptidase activity // inferred from sequence or structural similarity /// 4245 // neprilysin activity // inferred from electronic annotation /// 8270 // zinc ion binding // inferred from electronic annotation /// 8233 // peptidase activity // inferred from electronic annotation /// 8237 // metallopeptidase activity // inferred from electronic annotation /// 16787 // hydrolase a…	6508 // proteolysis // inferred from electronic annotation	16020 // membrane // inferred from electronic annotation	IPR008753 // Peptidase M13 // 1.0E-7 /// IPR000718 // Peptidase M13, neprilysin // 1.0E-36
3132	144331_at	-1.30457	0.931323	-20.1233	1.59401e-19	2.53774e-17	34.5545	FBgn0028949	CG15254	CG15254	CG15254	34915	4222 // metalloendopeptidase activity // inferred from sequence or structural similarity /// 8270 // zinc ion binding // inferred from electronic annotation /// 8533 // astacin activity // inferred from electronic annotation /// 8237 // metallopeptidase activity // inferred from electronic annotation /// 4222 // metalloendopeptidase activity // inferred from sequence similarity	6508 // proteolysis // inferred from electronic annotation	---	IPR001506 // Peptidase M12A, astacin // 5.2E-75
13232	154431_at	-1.57318	3.21841	-19.952	2.0466e-19	3.18587e-17	34.3038	FBgn0016122	CG10593	Acer	Angiotensin-converting enzyme-related	34189	4246 // peptidyl-dipeptidase A activity // inferred from sequence or structural similarity /// 4246 // peptidyl-dipeptidase A activity // non-traceable author statement /// 4246 // peptidyl-dipeptidase A activity // traceable author statement /// 8270 // zinc ion binding // inferred from electronic annotation /// 5515 // protein binding // inferred from physical interaction /// 4180 // carboxypep…	6508 // proteolysis // inferred from electronic annotation /// 7507 // heart development // inferred from mutant phenotype /// 6508 // proteolysis // traceable author statement	16020 // membrane // inferred from electronic annotation /// 5576 // extracellular region // inferred from direct assay	IPR001548 // Peptidase M2, peptidyl-dipeptidase A // 1.0E-126
9222	150421_at	-1.54335	3.06914	-19.7828	2.62461e-19	3.99682e-17	34.0542	FBgn0039049	CG6726	CG6726	CG6726	42728	4046 // aminoacylase activity // non-traceable author statement /// 8237 // metallopeptidase activity // inferred from electronic annotation /// 4046 // aminoacylase activity // inferred from electronic annotation /// 16787 // hydrolase activity // inferred from electronic annotation /// 46983 // protein dimerization activity // inferred from electronic annotation	6508 // proteolysis // inferred from electronic annotation /// 6520 // amino acid metabolism // inferred from electronic annotation	5737 // cytoplasm // inferred from electronic annotation	IPR002933 // Peptidase M20 // 7.9E-91 /// IPR002933 // Peptidase M20 // 7.9E-91
5894	147093_at	-2.489	2.05697	-19.7542	2.73759e-19	4.12405e-17	34.0119	FBgn0033733	CG8834	CG8834	CG8834	36356	16207 // 4-coumarate-CoA ligase activity // inferred from sequence or structural similarity /// 16874 // ligase activity // inferred from electronic annotation /// 16207 // 4-coumarate-CoA ligase activity // inferred from sequence similarity	8152 // metabolism // inferred from electronic annotation	---	IPR000873 // AMP-dependent synthetase and ligase // 5.9E-85
10757	151956_at	-1.11435	1.2036	-19.7227	2.86801e-19	4.27455e-17	33.9652	FBgn0033423	CG1809	CG1809	CG1809	35981	4035 // alkaline phosphatase activity // inferred from sequence or structural similarity /// 19204 // nucleotide phosphatase activity // inferred from electronic annotation /// 287 // magnesium ion binding // inferred from electronic annotation /// 8270 // zinc ion binding // inferred from electronic annotation /// 16787 // hydrolase activity // inferred from electronic annotation /// 4035 // alk…	1501 // skeletal development // inferred from electronic annotation /// 7498 // mesoderm development // inferred from electronic annotation /// 8152 // metabolism // inferred from electronic annotation	---	IPR001952 // Alkaline phosphatase // 8.2E-96
4054	145253_at	-1.67689	1.93527	-19.6097	3.39136e-19	4.94927e-17	33.7969	FBgn0030859	CG12990	CG12990	CG12990	32747	16747 // transferase activity, transferring groups other than amino-acyl groups // inferred from electronic annotation	---	---	---
11698	152897_at	-1.51251	1.9979	-19.5882	3.50141e-19	5.05719e-17	33.7648	FBgn0036422	CG3868	CG3868	CG3868	39580	---	---	---	---
4877	146076_at	-1.19109	3.18758	-19.4497	4.30509e-19	6.09236e-17	33.5573	FBgn0040097	CG17011	lectin-30A	lectin-30A	53541	5534 // galactose binding // inferred from sequence or structural similarity /// 5534 // galactose binding // inferred from sequence similarity	7283 // spermatogenesis // inferred from electronic annotation	---	IPR001304 // C-type lectin // 2.0E-7
11484	152683_at	-0.765623	1.41751	-19.4226	4.48339e-19	6.28124e-17	33.5165	FBgn0034883	CG17664	CG17664	CG17664	37737	5386 // carrier activity // inferred from electronic annotation /// 5488 // binding // inferred from electronic annotation /// 15250 // water channel activity // inferred from sequence or structural similarity /// 5215 // transporter activity // inferred from electronic annotation /// 15250 // water channel activity // inferred from sequence similarity	6810 // transport // inferred from electronic annotation /// 19725 // cell homeostasis // inferred from electronic annotation	16020 // membrane // inferred from electronic annotation /// 16021 // integral to membrane // inferred from electronic annotation	IPR000425 // Major intrinsic protein // 3.8E-51
9585	150784_at	-1.05711	1.00329	-19.3198	5.23177e-19	7.18599e-17	33.3615	FBgn0039598	CG14061	CG14061	CG14061	43396	4252 // serine-type endopeptidase activity // inferred from electronic annotation	6508 // proteolysis // inferred from electronic annotation	---	---
11735	152934_at	-1.90256	3.46752	-19.2534	5.78243e-19	7.86523e-17	33.2609	FBgn0023520	CG3857	CG3857	CG3857	2768908	---	---	---	---
11771	152970_at	-1.10128	2.56004	-19.2135	6.14168e-19	8.27355e-17	33.2004	FBgn0010548	CG11140	Aldh-III	Aldehyde dehydrogenase type III	45398	4028 // 3-chloroallyl aldehyde dehydrogenase activity // inferred from sequence or structural similarity /// 4030 // aldehyde dehydrogenase [NAD(P)+] activity // inferred from electronic annotation /// 16491 // oxidoreductase activity // inferred from electronic annotation /// 4028 // 3-chloroallyl aldehyde dehydrogenase activity // inferred from sequence similarity	6952 // defense response // inferred from electronic annotation /// 8152 // metabolism // inferred from electronic annotation /// 9636 // response to toxin // inferred from electronic annotation /// 6081 // aldehyde metabolism // inferred from electronic annotation	---	IPR002086 // Aldehyde dehydrogenase // 3.3E-32 /// IPR002086 // Aldehyde dehydrogenase // 8.4E-8 /// IPR002086 // Aldehyde dehydrogenase // 5.7E-49 /// IPR002086 // Aldehyde dehydrogenase // 1.3E-44 /// IPR002086 // Aldehyde dehydrogenase // 1.3E-44
9204	150403_at	-1.50081	1.76825	-19.1681	6.57854e-19	8.77765e-17	33.1313	FBgn0039030	CG6660	CG6660	CG6660	42708	8415 // acyltransferase activity // inferred from electronic annotation /// 16740 // transferase activity // inferred from electronic annotation	6629 // lipid metabolism // inferred from electronic annotation /// 6631 // fatty acid metabolism // inferred from electronic annotation	16021 // integral to membrane // inferred from electronic annotation	IPR002076 // GNS1/SUR4 membrane protein // 4.3E-8 /// IPR002076 // GNS1/SUR4 membrane protein // 4.3E-8
5815	147014_at	-1.93223	1.52473	-19.1452	6.81146e-19	8.92567e-17	33.0963	FBgn0043470	CG12350	Try	Try	36214	4263 // chymotrypsin activity // inferred from electronic annotation /// 4295 // trypsin activity // inferred from sequence or structural similarity /// 4295 // trypsin activity // non-traceable author statement /// 4252 // serine-type endopeptidase activity // inferred from electronic annotation /// 4295 // trypsin activity // inferred from electronic annotation /// 8233 // peptidase activity //…	6508 // proteolysis // non-traceable author statement /// 6508 // proteolysis // inferred from electronic annotation	5576 // extracellular region // inferred from sequence or structural similarity /// 5576 // extracellular region // inferred from sequence similarity	IPR001254 // Peptidase S1, chymotrypsin // 2.5E-81
7112	148311_f_at	-1.60604	1.32525	-19.1313	6.95626e-19	9.02381e-17	33.0752	FBgn0035744	CG8628	CG8628	CG8628	38783	62 // acyl-CoA binding // inferred from sequence or structural similarity /// 4857 // enzyme inhibitor activity // inferred from sequence or structural similarity /// 5386 // carrier activity // inferred from electronic annotation /// 50809 // diazepam binding // inferred from sequence or structural similarity /// 166 // nucleotide binding // inferred from electronic annotation /// 5524 // ATP bi…	6869 // lipid transport // inferred from electronic annotation /// 42049 // cell acyl-CoA homeostasis // inferred from sequence or structural similarity /// 1700 // embryonic development (sensu Insecta) // inferred from mutant phenotype /// 7399 // nervous system development // inferred from mutant phenotype /// 7411 // axon guidance // inferred from mutant phenotype /// 7413 // axonal fasciculat…	---	IPR000582 // Acyl-coA-binding protein, ACBP // 3.1E-32
13691	154890_at	-1.11366	2.00032	-19.0976	7.32164e-19	9.41066e-17	33.0237	FBgn0036289	CG10657	CG10657	CG10657	39423	5386 // carrier activity // inferred from electronic annotation /// 16918 // retinal binding // inferred from sequence or structural similarity /// 5515 // protein binding // inferred from physical interaction /// 5215 // transporter activity // inferred from electronic annotation /// 16918 // retinal binding // inferred from sequence similarity	6732 // coenzyme metabolism // inferred from electronic annotation /// 6810 // transport // inferred from electronic annotation /// 51189 // prosthetic group metabolism // inferred from electronic annotation	5622 // intracellular // inferred from electronic annotation	IPR001251 // Cellular retinaldehyde-binding)/triple function, C-terminal // 1.3E-10
7223	148422_at	-2.61815	2.82563	-19.0657	7.68585e-19	9.63242e-17	32.9749	FBgn0035926	CG5804	CG5804	CG5804	39005	62 // acyl-CoA binding // inferred from sequence or structural similarity /// 4857 // enzyme inhibitor activity // inferred from sequence or structural similarity /// 5386 // carrier activity // inferred from electronic annotation /// 50809 // diazepam binding // inferred from sequence or structural similarity /// 62 // acyl-CoA binding // inferred from electronic annotation /// 62 // acyl-CoA bi…	6869 // lipid transport // inferred from electronic annotation /// 42049 // cell acyl-CoA homeostasis // inferred from sequence or structural similarity /// 42049 // cell acyl-CoA homeostasis // inferred from sequence similarity	---	IPR000582 // Acyl-coA-binding protein, ACBP // 2.7E-15
7366	148565_at	-1.11159	1.11292	-19.06	7.75287e-19	9.63242e-17	32.9662	FBgn0036146	CG14141	CG14141	CG14141	39264	---	---	16020 // membrane // inferred from electronic annotation	IPR007110 // Immunoglobulin-like // 5.1E-6
8416	149615_at	-1.27807	1.58516	-19.0666	7.67558e-19	9.63242e-17	32.9763	FBgn0037788	CG3940	CG3940	CG3940	41238	4089 // carbonate dehydratase activity // inferred from sequence or structural similarity /// 8270 // zinc ion binding // inferred from electronic annotation /// 4089 // carbonate dehydratase activity // inferred from electronic annotation /// 4089 // carbonate dehydratase activity // inferred from sequence similarity	6730 // one-carbon compound metabolism // inferred from electronic annotation	---	IPR001148 // Carbonic anhydrase, eukaryotic // 7.7E-20 /// IPR001148 // Carbonic anhydrase, eukaryotic // 2.0E-14
9378	150577_at	-1.78917	2.426	-19.0528	7.83883e-19	9.63242e-17	32.9551	FBgn0051104	CG31104	CG31104	CG31104	43054	16301 // kinase activity // inferred from electronic annotation /// 16740 // transferase activity // inferred from electronic annotation	---	---	IPR004119 // Protein of unknown function DUF227 // 7.8E-101
10601	151800_at	-1.6906	2.9106	-19.0492	7.88115e-19	9.63242e-17	32.9497	FBgn0034229	CG4847	CG4847	CG4847	36973	4216 // cathepsin K activity // inferred from sequence or structural similarity /// 8234 // cysteine-type peptidase activity // inferred from sequence or structural similarity /// 4197 // cysteine-type endopeptidase activity // inferred from electronic annotation /// 8233 // peptidase activity // inferred from electronic annotation /// 8234 // cysteine-type peptidase activity // inferred from ele…	6508 // proteolysis // inferred from electronic annotation /// 6508 // proteolysis // inferred from sequence or structural similarity /// 6508 // proteolysis // inferred from sequence similarity	---	IPR000668 // Peptidase C1A, papain // 2.7E-96 /// IPR000668 // Peptidase C1A, papain // 2.7E-96
2142	143341_at	-1.89817	2.38511	-19.0171	8.27671e-19	9.99627e-17	32.9005	FBgn0003358	CG31039	Jon99Ci	Jonah 99Ci	43545	4252 // serine-type endopeptidase activity // inferred from sequence or structural similarity /// 4252 // serine-type endopeptidase activity // non-traceable author statement /// 4263 // chymotrypsin activity // inferred from electronic annotation /// 4295 // trypsin activity // inferred from electronic annotation /// 42708 // elastase activity // non-traceable author statement /// 4252 // serine…	6508 // proteolysis // non-traceable author statement /// 7586 // digestion // non-traceable author statement /// 6508 // proteolysis // inferred from electronic annotation	---	IPR001254 // Peptidase S1, chymotrypsin // 4.8E-60
3107	144306_at	-0.951535	1.52357	-18.9311	9.43924e-19	1.12071e-16	32.7684	FBgn0028915	CG7532	CG7532	CG7532	34838	4252 // serine-type endopeptidase activity // inferred from sequence or structural similarity /// 4252 // serine-type endopeptidase activity // inferred from sequence similarity	---	---	IPR002861 // Reeler region // 8.5E-11
2404	143603_i_at	-2.37406	2.88584	-18.8706	1.03568e-18	1.21931e-16	32.6751	FBgn0050031 /// FBgn0010359 /// FBgn0010358	CG30028 /// CG30031 /// CG12351	CG30031 /// Try	CG30031 /// Trypsin /// Trypsin	246404 /// 36221 /// 48343	4252 // serine-type endopeptidase activity // non-traceable author statement /// 4263 // chymotrypsin activity // inferred from electronic annotation /// 4295 // trypsin activity // inferred from electronic annotation /// 4295 // trypsin activity // non-traceable author statement /// 4295 // trypsin activity // inferred from sequence or structural similarity /// 19899 // enzyme binding // inferre…	6508 // proteolysis // inferred from electronic annotation /// 6508 // proteolysis // non-traceable author statement /// 6508 // proteolysis // inferred from sequence or structural similarity /// 30422 // RNA interference, production of siRNA // inferred from mutant phenotype /// 30423 // RNA interference, targeting of mRNA for destruction // inferred from mutant phenotype /// 35196 // miRNA-medi…	5576 // extracellular region // non-traceable author statement /// 5576 // extracellular region // inferred from sequence or structural similarity /// 5576 // extracellular region // inferred from sequence similarity	IPR001254 // Peptidase S1, chymotrypsin // 1.7E-85
1754	142953_at	-1.09084	0.846451	-18.8347	1.09437e-18	1.26712e-16	32.6197	FBgn0030774	CG9675	CG9675	CG9675	32648	4252 // serine-type endopeptidase activity // non-traceable author statement /// 4263 // chymotrypsin activity // inferred from electronic annotation /// 4295 // trypsin activity // inferred from electronic annotation /// 5515 // protein binding // inferred from physical interaction /// 4252 // serine-type endopeptidase activity // inferred from electronic annotation	6508 // proteolysis // inferred from electronic annotation	---	IPR001254 // Peptidase S1, chymotrypsin // 4.2E-44
2044	143243_at	-1.76745	1.99703	-18.5127	1.80224e-18	1.97261e-16	32.1178	FBgn0002571	CG8695	LvpL	Larval visceral protein L	35826	4556 // alpha-amylase activity // inferred from electronic annotation /// 4558 // alpha-glucosidase activity // inferred from sequence or structural similarity /// 4558 // alpha-glucosidase activity // non-traceable author statement /// 5215 // transporter activity // inferred from electronic annotation /// 4558 // alpha-glucosidase activity // inferred from electronic annotation /// 16787 // hyd…	6006 // glucose metabolism // non-traceable author statement /// 5975 // carbohydrate metabolism // inferred from electronic annotation	---	IPR006047 // Alpha amylase, catalytic domain // 1.0E-126
12849	154048_at	-0.947739	2.19353	-18.5174	1.78898e-18	1.97261e-16	32.1253	FBgn0026576	CG5991	CG5991	CG5991	42849	4609 // phosphatidylserine decarboxylase activity // inferred from sequence or structural similarity /// 4609 // phosphatidylserine decarboxylase activity // inferred from electronic annotation /// 4609 // phosphatidylserine decarboxylase activity // inferred from sequence similarity	6644 // phospholipid metabolism // inferred from electronic annotation /// 8654 // phospholipid biosynthesis // inferred from electronic annotation	---	IPR003817 // Phosphatidylserine decarboxylase-related // 5.5E-51
7825	149024_at	-1.04146	1.46463	-18.487	1.87599e-18	2.03741e-16	32.0775	FBgn0036833	CG3819	CG3819	CG3819	40069	5515 // protein binding // inferred from physical interaction /// 3676 // nucleic acid binding // inferred from electronic annotation /// 4519 // endonuclease activity // inferred from electronic annotation	---	---	IPR001604 // DNA/RNA non-specific endonuclease // 3.8E-88
238	141437_at	-1.4091	1.29215	-18.4758	1.90899e-18	2.0573e-16	32.0599	FBgn0036975	CG5618	CG5618	CG5618	40241	4782 // sulfinoalanine decarboxylase activity // inferred from sequence or structural similarity /// 17039 // dipeptidyl-peptidase III activity // inferred from electronic annotation /// 5515 // protein binding // inferred from physical interaction /// 16829 // lyase activity // inferred from electronic annotation /// 16831 // carboxy-lyase activity // inferred from electronic annotation /// 4782…	6508 // proteolysis // inferred from electronic annotation /// 6520 // amino acid metabolism // inferred from electronic annotation /// 6790 // sulfur metabolism // inferred from electronic annotation /// 7268 // synaptic transmission // inferred from electronic annotation /// 19752 // carboxylic acid metabolism // inferred from electronic annotation	5737 // cytoplasm // inferred from electronic annotation	IPR002129 // Pyridoxal-dependent decarboxylase // 1.3E-96 /// IPR002129 // Pyridoxal-dependent decarboxylase // 1.5E-80
9694	150893_f_at	-2.77694	4.23988	-18.463	1.94778e-18	2.08308e-16	32.0397	FBgn0039778 /// FBgn0039777	CG2229 /// CG18030	Jon99Fi /// Jon99Fii	Jonah 99Fi /// Jonah 99Fii	43621 /// 43622	4252 // serine-type endopeptidase activity // inferred from sequence or structural similarity /// 4263 // chymotrypsin activity // inferred from electronic annotation /// 4295 // trypsin activity // inferred from electronic annotation /// 42708 // elastase activity // non-traceable author statement /// 3700 // transcription factor activity // inferred from mutant phenotype /// 4252 // serine-type…	6508 // proteolysis // non-traceable author statement /// 2168 // larval development (sensu Insecta) // inferred from mutant phenotype /// 7591 // molting cycle (sensu Insecta) // inferred from mutant phenotype /// 6508 // proteolysis // inferred from electronic annotation	5634 // nucleus // inferred from direct assay	IPR001254 // Peptidase S1, chymotrypsin // 8.0E-56 /// IPR001254 // Peptidase S1, chymotrypsin // 3.7E-55
4976	146175_at	-2.05139	3.82536	-18.4398	2.0198e-18	2.14374e-16	32.0031	FBgn0032275	CG17097	CG17097	CG17097	34461	4806 // triacylglycerol lipase activity // inferred from sequence or structural similarity /// 16298 // lipase activity // inferred from sequence or structural similarity /// 3824 // catalytic activity // inferred from electronic annotation /// 16787 // hydrolase activity // inferred from electronic annotation /// 16789 // carboxylic ester hydrolase activity // inferred from electronic annotation…	6629 // lipid metabolism // inferred from electronic annotation /// 6629 // lipid metabolism // inferred from sequence or structural similarity /// 16042 // lipid catabolism // inferred from electronic annotation /// 6629 // lipid metabolism // inferred from sequence similarity	---	IPR006693 // Ab-hydrolase associated lipase region // 7.9E-24 /// IPR006693 // Ab-hydrolase associated lipase region // 7.9E-24
11614	152813_at	-1.15603	1.46848	-18.1912	2.98738e-18	3.10024e-16	31.6092	FBgn0031800	CG9497	CG9497	CG9497	33884	16301 // kinase activity // inferred from electronic annotation /// 16740 // transferase activity // inferred from electronic annotation	---	---	IPR004119 // Protein of unknown function DUF227 // 1.8E-85
4851	146050_at	-2.86677	2.01751	-18.152	3.17879e-18	3.25072e-16	31.5466	FBgn0032069	CG9468	CG9468	CG9468	34206	4559 // alpha-mannosidase activity // inferred from sequence or structural similarity /// 16799 // hydrolase activity, hydrolyzing N-glycosyl compounds // inferred from electronic annotation /// 4559 // alpha-mannosidase activity // inferred from electronic annotation /// 15923 // mannosidase activity // inferred from electronic annotation /// 16787 // hydrolase activity // inferred from electron…	5975 // carbohydrate metabolism // inferred from electronic annotation /// 6013 // mannose metabolism // inferred from electronic annotation	5764 // lysosome // inferred from sequence or structural similarity /// 5764 // lysosome // inferred from sequence similarity	IPR000602 // Glycoside hydrolase, family 38 // 1.0E-126
3654	144853_at	-1.43471	2.48074	-18.1324	3.27902e-18	3.32892e-16	31.5154	FBgn0030272	CG15201	CG15201	CG15201	32053	---	---	---	---
13582	154781_at	-1.14587	1.57245	-18.1029	3.4363e-18	3.46349e-16	31.4682	FBgn0043792	CG30427	CG30427	CG30427	37986	16491 // oxidoreductase activity // inferred from electronic annotation	---	---	IPR004262 // Male sterility protein // 5.6E-100
948	142147_at	-2.68829	2.73239	-18.0348	3.83023e-18	3.83297e-16	31.3589	FBgn0032068	CG9466	CG9466	CG9466	34205	4559 // alpha-mannosidase activity // inferred from sequence or structural similarity /// 16799 // hydrolase activity, hydrolyzing N-glycosyl compounds // inferred from electronic annotation /// 4559 // alpha-mannosidase activity // inferred from electronic annotation /// 15923 // mannosidase activity // inferred from electronic annotation /// 16787 // hydrolase activity // inferred from electron…	5975 // carbohydrate metabolism // inferred from electronic annotation /// 6013 // mannose metabolism // inferred from electronic annotation	5764 // lysosome // inferred from sequence or structural similarity /// 5764 // lysosome // inferred from sequence similarity	IPR000602 // Glycoside hydrolase, family 38 // 1.0E-126
11910	153109_at	-1.28903	1.74524	-17.9938	4.08883e-18	4.06273e-16	31.2931	FBgn0034521	CG13431	Mgat1	UDP-GlcNAc:a-3-D-mannoside-1,2-N-acetylglucosaminyltransferase I	37323	3827 // alpha-1,3-mannosylglycoprotein 2-beta-N-acetylglucosaminyltransferase activity // inferred from sequence or structural similarity /// 3827 // alpha-1,3-mannosylglycoprotein 2-beta-N-acetylglucosaminyltransferase activity // non-traceable author statement /// 8375 // acetylglucosaminyltransferase activity // inferred from direct assay /// 3827 // alpha-1,3-mannosylglycoprotein 2-beta-N-ace…	6486 // protein amino acid glycosylation // inferred from electronic annotation /// 6487 // protein amino acid N-linked glycosylation // inferred from electronic annotation	139 // Golgi membrane // inferred from electronic annotation	IPR004139 // Glycosyl transferase, family 13 // 1.0E-126
8396	149595_at	-1.17908	2.71067	-17.9796	4.18297e-18	4.127e-16	31.2701	FBgn0037765	CG9458	CG9458	CG9458	41214	8415 // acyltransferase activity // inferred from electronic annotation /// 16740 // transferase activity // inferred from electronic annotation /// 5515 // protein binding // inferred from physical interaction	6629 // lipid metabolism // inferred from electronic annotation /// 6631 // fatty acid metabolism // inferred from electronic annotation	16021 // integral to membrane // inferred from electronic annotation	---
2730	143929_at	-1.37922	1.1341	-17.9659	4.27557e-18	4.18886e-16	31.2481	FBgn0020508	CG9540	Ag5r2	Antigen 5-related 2	44079	---	6952 // defense response // inferred from electronic annotation	5576 // extracellular region // inferred from sequence or structural similarity /// 5576 // extracellular region // inferred from electronic annotation /// 5576 // extracellular region // inferred from sequence similarity	IPR001283 // Allergen V5/Tpx-1 related // 2.2E-45
108	141307_at	-0.717304	1.93679	-17.8028	5.55567e-18	5.33642e-16	30.9842	FBgn0034225	CG4827	CG4827	CG4827	36968	8253 // 5'-nucleotidase activity // inferred from sequence or structural similarity /// 166 // nucleotide binding // inferred from electronic annotation /// 16787 // hydrolase activity // inferred from electronic annotation /// 16788 // hydrolase activity, acting on ester bonds // inferred from electronic annotation /// 46872 // metal ion binding // inferred from electronic annotation /// 8253 //…	6139 // nucleobase, nucleoside, nucleotide and nucleic acid metabolism // inferred from electronic annotation /// 9166 // nucleotide catabolism // inferred from electronic annotation	---	IPR004843 // Metallo-phosphoesterase // 6.7E-19 /// IPR008334 // 5-Nucleotidase, C-terminal // 1.8E-62
4035	145234_at	-1.50277	1.42211	-17.8022	5.56115e-18	5.33642e-16	30.9833	FBgn0030827	CG18258	CG18258	CG18258	32708	16298 // lipase activity // inferred from electronic annotation /// 16787 // hydrolase activity // inferred from electronic annotation /// 3824 // catalytic activity // inferred from electronic annotation	6629 // lipid metabolism // inferred from electronic annotation /// 6644 // phospholipid metabolism // inferred from electronic annotation /// 7275 // development // inferred from electronic annotation /// 7276 // gametogenesis // inferred from electronic annotation /// 7292 // female gamete generation // inferred from electronic annotation	---	IPR000734 // Lipase // 7.4E-40
3032	144231_at	-1.12771	1.55918	-17.7591	5.96148e-18	5.68166e-16	30.9132	FBgn0028532	CG7968	CG7968	CG7968	34802	---	---	---	---
10761	151960_at	-1.41885	2.32431	-17.6821	6.75226e-18	6.30661e-16	30.7877	FBgn0010246	CG9155	Myo61F	Myosin 61F	38153	3774 // motor activity // non-traceable author statement /// 3779 // actin binding // non-traceable author statement /// 5200 // structural constituent of cytoskeleton // inferred from electronic annotation /// 5524 // ATP binding // inferred from electronic annotation /// 42623 // ATPase activity, coupled // inferred from sequence or structural similarity /// 166 // nucleotide binding // inferre…	6886 // intracellular protein transport // inferred from electronic annotation /// 7498 // mesoderm development // inferred from expression pattern /// 7601 // visual perception // inferred from electronic annotation /// 7605 // sensory perception of sound // inferred from electronic annotation /// 16192 // vesicle-mediated transport // inferred from electronic annotation	5737 // cytoplasm // non-traceable author statement /// 16459 // myosin // inferred from sequence or structural similarity /// 16459 // myosin // inferred from electronic annotation /// 16459 // myosin // inferred from sequence similarity	IPR001609 // Myosin head (motor domain) // 1.0E-126 /// IPR000048 // IQ calmodulin-binding region // 2.8E-5 /// IPR010926 // Myosin tail 2 // 1.6E-72 /// IPR001609 // Myosin head (motor domain) // 1.0E-126 /// IPR000048 // IQ calmodulin-binding region // 2.8E-5 /// IPR010926 // Myosin tail 2 // 1.6E-72 /// IPR001609 // Myosin head (motor domain) // 1.0E-126 /// IPR000048 // IQ calmodulin-binding …
2042	143241_at	-1.38234	1.993	-17.5979	7.74157e-18	7.18275e-16	30.6499	FBgn0002569	CG8694	LvpD	Larval visceral protein D	35825	4556 // alpha-amylase activity // inferred from electronic annotation /// 4558 // alpha-glucosidase activity // inferred from sequence or structural similarity /// 4558 // alpha-glucosidase activity // non-traceable author statement /// 4558 // alpha-glucosidase activity // inferred from electronic annotation /// 16787 // hydrolase activity // inferred from electronic annotation /// 16798 // hydr…	6006 // glucose metabolism // non-traceable author statement /// 5975 // carbohydrate metabolism // inferred from electronic annotation	---	IPR006047 // Alpha amylase, catalytic domain // 1.0E-126
128	141327_at	-1.18981	0.825292	-17.554	8.31551e-18	7.6645e-16	30.5778	FBgn0038135	CG8773	CG8773	CG8773	41634	4179 // membrane alanyl aminopeptidase activity // inferred from electronic annotation /// 4230 // glutamyl aminopeptidase activity // inferred from sequence or structural similarity /// 8270 // zinc ion binding // inferred from electronic annotation /// 4230 // glutamyl aminopeptidase activity // inferred from sequence similarity	6508 // proteolysis // inferred from electronic annotation	---	IPR001930 // Peptidase M1, membrane alanine aminopeptidase // 1.0E-126
5348	146547_at	-1.13492	3.55068	-17.5041	9.02142e-18	8.20715e-16	30.4957	FBgn0032868	CG17472	CG17472	CG17472	35320	---	---	---	---
2073	143272_at	-1.43114	3.24277	-17.466	9.60249e-18	8.67941e-16	30.4327	FBgn0002855	CG8982	Acp26Aa	Accessory gland-specific peptide 26Aa	33817	5179 // hormone activity // non-traceable author statement	7321 // sperm displacement // non-traceable author statement /// 7618 // mating // inferred from electronic annotation /// 18991 // oviposition // non-traceable author statement /// 18991 // oviposition // traceable author statement /// 30728 // ovulation // inferred from mutant phenotype /// 30728 // ovulation // traceable author statement /// 45297 // post-mating behavior // non-traceable autho…	5576 // extracellular region // non-traceable author statement	IPR004315 // Male Drosophila accessory gland secretory protein // 1.0E-126
2425	143624_at	-2.09639	3.06914	-17.3073	1.24627e-17	1.11925e-15	30.1699	FBgn0010425	CG18681	Try	Trypsin	49080	4263 // chymotrypsin activity // inferred from electronic annotation /// 4295 // trypsin activity // non-traceable author statement /// 4252 // serine-type endopeptidase activity // inferred from electronic annotation	6508 // proteolysis // non-traceable author statement /// 6508 // proteolysis // inferred from electronic annotation	5576 // extracellular region // non-traceable author statement	IPR001254 // Peptidase S1, chymotrypsin // 5.6E-86
4003	145202_at	-1.6562	1.63979	-17.0459	1.92362e-17	1.68437e-15	29.732	FBgn0030775	CG9673	CG9673	CG9673	32649	4252 // serine-type endopeptidase activity // non-traceable author statement /// 4263 // chymotrypsin activity // inferred from electronic annotation /// 4295 // trypsin activity // inferred from electronic annotation /// 4252 // serine-type endopeptidase activity // inferred from electronic annotation	6508 // proteolysis // inferred from electronic annotation	---	IPR001254 // Peptidase S1, chymotrypsin // 1.5E-54
11864	153063_at	-0.856447	2.3302	-16.8864	2.51313e-17	2.16006e-15	29.4623	FBgn0032713	CG17323	CG17323	CG17323	35138	15020 // glucuronosyltransferase activity // inferred from sequence or structural similarity /// 16740 // transferase activity // inferred from electronic annotation /// 16757 // transferase activity, transferring glycosyl groups // inferred from electronic annotation /// 16758 // transferase activity, transferring hexosyl groups // inferred from electronic annotation /// 15020 // glucuronosyltra…	5976 // polysaccharide metabolism // inferred from electronic annotation /// 6952 // defense response // inferred from electronic annotation /// 8202 // steroid metabolism // inferred from electronic annotation /// 9636 // response to toxin // inferred from electronic annotation /// 8152 // metabolism // inferred from electronic annotation	---	IPR002213 // UDP-glucoronosyl/UDP-glucosyl transferase // 1.9E-42
10278	151477_at	-0.96784	1.44975	-16.833	2.74992e-17	2.34917e-15	29.3714	FBgn0031737	CG11142	CG11142	CG11142	33806	8061 // chitin binding // inferred from electronic annotation /// 16490 // structural constituent of peritrophic membrane (sensu Insecta) // inferred from sequence or structural similarity /// 5515 // protein binding // inferred from physical interaction /// 16490 // structural constituent of peritrophic membrane (sensu Insecta) // inferred from sequence similarity	6030 // chitin metabolism // inferred from electronic annotation	5576 // extracellular region // inferred from electronic annotation	IPR002557 // Chitin binding Peritrophin-A // 2.2E-10 /// IPR002557 // Chitin binding Peritrophin-A // 8.0E-14 /// IPR002557 // Chitin binding Peritrophin-A // 1.7E-12
11368	152567_at	-1.29867	1.55536	-16.7972	2.9213e-17	2.48045e-15	29.3104	FBgn0031929	CG18585	CG18585	CG18585	34041	4180 // carboxypeptidase activity // inferred from electronic annotation /// 4182 // carboxypeptidase A activity // inferred from electronic annotation /// 8233 // peptidase activity // inferred from electronic annotation /// 8237 // metallopeptidase activity // inferred from electronic annotation	6508 // proteolysis // inferred from electronic annotation /// 19538 // protein metabolism // inferred from electronic annotation	---	IPR000834 // Peptidase M14, carboxypeptidase A // 6.1E-78 /// IPR003146 // Peptidase M14A, carboxypeptidase activation peptide // 2.5E-8 /// IPR000834 // Peptidase M14, carboxypeptidase A // 6.1E-78 /// IPR003146 // Peptidase M14A, carboxypeptidase activation peptide // 6.0E-6
10814	152013_at	-1.40657	2.63906	-16.7892	2.96096e-17	2.49898e-15	29.2968	FBgn0027586	CG5867	CG5867	CG5867	34728	---	---	---	IPR004272 // Odorant binding protein // 2.2E-52
7635	148834_at	-1.1289	0.89999	-16.7596	3.11281e-17	2.6114e-15	29.2463	FBgn0036547	CG17032	CG17032	CG17032	39736	5515 // protein binding // inferred from physical interaction	---	---	---
1755	142954_at	-1.5353	2.51996	-16.7449	3.19164e-17	2.6616e-15	29.2211	FBgn0034290	CG5773	CG5773	CG5773	37053	---	---	---	---
5359	146558_at	-1.02929	1.14103	-16.7291	3.2779e-17	2.71736e-15	29.1942	FBgn0032896	CG14400	CG14400	CG14400	35354	---	---	---	---
10781	151980_at	-1.76193	1.52305	-16.5851	4.18821e-17	3.45158e-15	28.9468	FBgn0035620	CG5150	CG5150	CG5150	38633	4035 // alkaline phosphatase activity // inferred from sequence or structural similarity /// 19204 // nucleotide phosphatase activity // inferred from electronic annotation /// 4035 // alkaline phosphatase activity // inferred from sequence similarity	1501 // skeletal development // inferred from electronic annotation /// 7498 // mesoderm development // inferred from electronic annotation /// 8152 // metabolism // inferred from electronic annotation	---	IPR001952 // Alkaline phosphatase // 2.5E-84
8130	149329_at	-0.749854	0.496001	-16.575	4.26104e-17	3.49106e-15	28.9294	FBgn0037323	CG2663	CG2663	CG2663	40649	5386 // carrier activity // inferred from electronic annotation /// 8431 // vitamin E binding // inferred from sequence or structural similarity /// 5215 // transporter activity // inferred from electronic annotation /// 8431 // vitamin E binding // inferred from sequence similarity	6732 // coenzyme metabolism // inferred from electronic annotation /// 6810 // transport // inferred from electronic annotation /// 51189 // prosthetic group metabolism // inferred from electronic annotation	5622 // intracellular // inferred from electronic annotation	IPR001251 // Cellular retinaldehyde-binding)/triple function, C-terminal // 6.5E-14 /// IPR001251 // Cellular retinaldehyde-binding)/triple function, C-terminal // 6.5E-14
6036	147235_at	-1.54125	1.98876	-16.5279	4.61899e-17	3.76233e-15	28.8479	FBgn0033999	CG8093	CG8093	CG8093	36686	4806 // triacylglycerol lipase activity // inferred from sequence or structural similarity /// 16298 // lipase activity // inferred from sequence or structural similarity /// 5515 // protein binding // inferred from physical interaction /// 3824 // catalytic activity // inferred from electronic annotation /// 16787 // hydrolase activity // inferred from electronic annotation /// 16789 // carboxyl…	6629 // lipid metabolism // inferred from electronic annotation /// 6629 // lipid metabolism // inferred from sequence or structural similarity /// 16042 // lipid catabolism // inferred from electronic annotation /// 6629 // lipid metabolism // inferred from sequence similarity	---	IPR006693 // Ab-hydrolase associated lipase region // 2.1E-27
13764	154963_at	-1.12306	2.32095	-16.516	4.7138e-17	3.81736e-15	28.8274	FBgn0032783	CG10237	CG10237	CG10237	35222	5386 // carrier activity // inferred from electronic annotation /// 8431 // vitamin E binding // inferred from sequence or structural similarity /// 16918 // retinal binding // inferred from sequence or structural similarity /// 5215 // transporter activity // inferred from electronic annotation /// 8431 // vitamin E binding // inferred from sequence similarity /// 16918 // retinal binding // inf…	6732 // coenzyme metabolism // inferred from electronic annotation /// 6810 // transport // inferred from electronic annotation /// 51189 // prosthetic group metabolism // inferred from electronic annotation	5622 // intracellular // inferred from electronic annotation	IPR001251 // Cellular retinaldehyde-binding)/triple function, C-terminal // 3.3E-36 /// IPR001251 // Cellular retinaldehyde-binding)/triple function, C-terminal // 3.3E-36 /// IPR001251 // Cellular retinaldehyde-binding)/triple function, C-terminal // 3.3E-36
2139	143338_f_at	-2.75236	5.2732	-16.4997	4.84757e-17	3.90313e-15	28.7992	FBgn0003356 /// FBgn0003357	CG31362 /// CG31034	Jon99Cii /// Jon99Ciii	Jonah 99Cii /// Jonah 99Ciii	43543 /// 43544	4252 // serine-type endopeptidase activity // inferred from sequence or structural similarity /// 4252 // serine-type endopeptidase activity // non-traceable author statement /// 4263 // chymotrypsin activity // non-traceable author statement /// 4295 // trypsin activity // inferred from electronic annotation /// 8236 // serine-type peptidase activity // non-traceable author statement /// 5515 //…	6508 // proteolysis // non-traceable author statement /// 7586 // digestion // non-traceable author statement /// 6508 // proteolysis // inferred from electronic annotation	---	IPR001254 // Peptidase S1, chymotrypsin // 1.1E-57 /// IPR001254 // Peptidase S1, chymotrypsin // 1.2E-22
8643	149842_at	-0.983671	1.48781	-16.4487	5.2909e-17	4.2295e-15	28.7108	FBgn0041711	CG9792	yellow-e	yellow-e	41653	---	---	---	IPR003534 // Major royal jelly protein // 5.3E-126
11353	152552_at	-0.840341	3.31811	-16.3064	6.76298e-17	5.323e-15	28.4629	FBgn0053970	---	CG33970	CG33970	43186	166 // nucleotide binding // inferred from electronic annotation /// 5215 // transporter activity // inferred from sequence or structural similarity /// 5524 // ATP binding // inferred from electronic annotation /// 42626 // ATPase activity, coupled to transmembrane movement of substances // inferred from sequence or structural similarity /// 16887 // ATPase activity // inferred from electronic a…	6810 // transport // inferred from sequence or structural similarity /// 6810 // transport // inferred from electronic annotation /// 6810 // transport // inferred from sequence similarity	16020 // membrane // inferred from electronic annotation /// 43190 // ATP-binding cassette (ABC) transporter complex // inferred from sequence or structural similarity /// 43190 // ATP-binding cassette (ABC) transporter complex // inferred from sequence similarity	---
11090	152289_at	-0.86754	0.757498	-16.2631	7.28914e-17	5.70508e-15	28.3872	FBgn0030148	CG3106	CG3106	CG3106	31909	16747 // transferase activity, transferring groups other than amino-acyl groups // inferred from electronic annotation	---	---	IPR002656 // Acyltransferase 3 family // 5.1E-7
4380	145579_at	-1.02486	2.32638	-16.2147	7.92922e-17	6.17157e-15	28.3022	FBgn0051659	CG31659	CG31659	CG31659	318875	---	---	---	---
1054	142253_at	-1.42489	2.74185	-16.1599	8.72261e-17	6.71449e-15	28.2058	FBgn0039325	CG10560	CG10560	CG10560	43065	16301 // kinase activity // inferred from electronic annotation /// 16740 // transferase activity // inferred from electronic annotation	---	---	IPR004119 // Protein of unknown function DUF227 // 6.7E-111
6855	148054_at	-1.3215	1.8545	-16.1284	9.21599e-17	7.01718e-15	28.1502	FBgn0035355	CG16985	CG16985	CG16985	38323	5515 // protein binding // inferred from physical interaction /// 3824 // catalytic activity // inferred from electronic annotation	---	---	IPR006683 // Thioesterase superfamily // 5.9E-18
4580	145779_at	-1.49089	1.92457	-16.1202	9.34755e-17	7.07887e-15	28.1359	FBgn0031629	CG3244	CG3244	CG3244	33678	5529 // sugar binding // inferred from electronic annotation	---	---	---
9079	150278_at	-0.73284	2.36651	-16.0721	1.01679e-16	7.6207e-15	28.0509	FBgn0038830	CG17272	CG17272	CG17272	42465	5509 // calcium ion binding // inferred from sequence or structural similarity /// 5516 // calmodulin binding // inferred from electronic annotation /// 5515 // protein binding // inferred from physical interaction /// 5509 // calcium ion binding // inferred from electronic annotation /// 5509 // calcium ion binding // inferred from sequence similarity	19722 // calcium-mediated signaling // inferred from electronic annotation	---	IPR002048 // Calcium-binding EF-hand // 0.032
10513	151712_at	-0.780468	1.11648	-16.0719	1.01718e-16	7.6207e-15	28.0505	FBgn0031097	CG17052	CG17052	CG17052	33022	8061 // chitin binding // inferred from electronic annotation /// 16490 // structural constituent of peritrophic membrane (sensu Insecta) // inferred from sequence or structural similarity /// 16490 // structural constituent of peritrophic membrane (sensu Insecta) // inferred from sequence similarity	6030 // chitin metabolism // inferred from electronic annotation	5576 // extracellular region // inferred from electronic annotation	IPR002557 // Chitin binding Peritrophin-A // 7.6E-17 /// IPR002557 // Chitin binding Peritrophin-A // 4.0E-17 /// IPR002557 // Chitin binding Peritrophin-A // 2.7E-13
11527	152726_at	-1.46709	1.63778	-16.0452	1.06588e-16	7.90108e-15	28.0033	FBgn0033271	CG8708	CG8708	CG8708	35792	16740 // transferase activity // inferred from electronic annotation /// 16757 // transferase activity, transferring glycosyl groups // inferred from electronic annotation /// 48531 // beta-1,3-galactosyltransferase activity // inferred from direct assay	6464 // protein modification // inferred from electronic annotation /// 6486 // protein amino acid glycosylation // inferred from direct assay /// 6486 // protein amino acid glycosylation // inferred from electronic annotation /// 19538 // protein metabolism // inferred from electronic annotation	---	---
7029	148228_at	-1.54187	1.37282	-16.0141	1.12569e-16	8.21404e-15	27.9481	FBgn0035619	CG10592	CG10592	CG10592	38632	4035 // alkaline phosphatase activity // inferred from sequence or structural similarity /// 19204 // nucleotide phosphatase activity // inferred from electronic annotation /// 4035 // alkaline phosphatase activity // inferred from sequence similarity	1501 // skeletal development // inferred from electronic annotation /// 7498 // mesoderm development // inferred from electronic annotation /// 8152 // metabolism // inferred from electronic annotation	---	IPR001952 // Alkaline phosphatase // 9.2E-84
11580	152779_at	-1.10538	1.03243	-15.9145	1.34135e-16	9.73698e-15	27.771	FBgn0038136	CG8774	CG8774	CG8774	41635	3676 // nucleic acid binding // inferred from electronic annotation /// 4179 // membrane alanyl aminopeptidase activity // inferred from electronic annotation /// 4230 // glutamyl aminopeptidase activity // inferred from sequence or structural similarity /// 4519 // endonuclease activity // inferred from electronic annotation /// 8270 // zinc ion binding // inferred from electronic annotation ///…	6508 // proteolysis // inferred from electronic annotation	---	IPR001930 // Peptidase M1, membrane alanine aminopeptidase // 1.0E-126 /// IPR001930 // Peptidase M1, membrane alanine aminopeptidase // 1.0E-126
12811	154010_at	-0.783278	1.39646	-15.8768	1.43381e-16	1.03545e-14	27.7036	FBgn0027528	CG9634	CG9634	CG9634	32660	4222 // metalloendopeptidase activity // inferred from sequence or structural similarity /// 16511 // endothelin-converting enzyme activity // inferred from sequence or structural similarity /// 4245 // neprilysin activity // inferred from electronic annotation /// 8237 // metallopeptidase activity // inferred from electronic annotation /// 4222 // metalloendopeptidase activity // inferred from s…	6508 // proteolysis // inferred from electronic annotation /// 7165 // signal transduction // inferred from electronic annotation	16020 // membrane // inferred from electronic annotation	IPR008753 // Peptidase M13 // 2.0E-6
3852	145051_at	-0.785258	1.19457	-15.8636	1.46767e-16	1.05447e-14	27.68	FBgn0030545	CG11590	CG11590	CG11590	32368	5215 // transporter activity // inferred from electronic annotation /// 8324 // cation transporter activity // inferred from electronic annotation	6810 // transport // inferred from electronic annotation /// 6811 // ion transport // inferred from electronic annotation /// 6812 // cation transport // inferred from electronic annotation /// 19725 // cell homeostasis // inferred from electronic annotation	---	IPR004323 // CutA1 divalent ion tolerance protein // 2.0E-65
7955	149154_at	-1.17897	1.05047	-15.8392	1.53243e-16	1.08982e-14	27.6364	FBgn0037036	CG10586	CG10586	CG10586	40315	4175 // endopeptidase activity // inferred from sequence or structural similarity /// 4263 // chymotrypsin activity // inferred from electronic annotation /// 4295 // trypsin activity // non-traceable author statement /// 4252 // serine-type endopeptidase activity // inferred from electronic annotation /// 4175 // endopeptidase activity // inferred from sequence similarity	6508 // proteolysis // non-traceable author statement /// 6508 // proteolysis // inferred from electronic annotation	---	IPR001254 // Peptidase S1, chymotrypsin // 2.2E-54
190	141389_at	-1.03287	1.24866	-15.8212	1.58211e-16	1.11946e-14	27.6041	FBgn0034582	CG10531	CG10531	CG10531	37392	4568 // chitinase activity // inferred from sequence or structural similarity /// 8083 // growth factor activity // inferred from electronic annotation /// 16799 // hydrolase activity, hydrolyzing N-glycosyl compounds // inferred from electronic annotation /// 4553 // hydrolase activity, hydrolyzing O-glycosyl compounds // inferred from electronic annotation /// 4568 // chitinase activity // infe…	5976 // polysaccharide metabolism // inferred from electronic annotation /// 7165 // signal transduction // inferred from electronic annotation /// 7267 // cell-cell signaling // inferred from electronic annotation /// 5975 // carbohydrate metabolism // inferred from electronic annotation /// 6032 // chitin catabolism // inferred from electronic annotation	---	IPR001223 // Glycoside hydrolase, family 18 // 1.3E-114
5250	146449_at	-0.963605	1.42504	-15.7836	1.69115e-16	1.19061e-14	27.5368	FBgn0032706	CG10369	Irk3	Inwardly rectifying potassium channel 3	35131	5242 // inward rectifier potassium channel activity // inferred from sequence or structural similarity /// 5242 // inward rectifier potassium channel activity // non-traceable author statement /// 5216 // ion channel activity // inferred from electronic annotation /// 5242 // inward rectifier potassium channel activity // inferred from electronic annotation /// 5242 // inward rectifier potassium …	6812 // cation transport // inferred from electronic annotation /// 6813 // potassium ion transport // inferred from electronic annotation	16020 // membrane // inferred from electronic annotation	IPR001838 // K+ channel, inward rectifier // 4.1E-83
2141	143340_f_at	-2.81168	5.27556	-15.6971	1.97257e-16	1.38178e-14	27.3812	FBgn0003356 /// FBgn0003357	CG31362 /// CG31034	Jon99Cii /// Jon99Ciii	Jonah 99Cii /// Jonah 99Ciii	43543 /// 43544	4252 // serine-type endopeptidase activity // inferred from sequence or structural similarity /// 4252 // serine-type endopeptidase activity // non-traceable author statement /// 4263 // chymotrypsin activity // non-traceable author statement /// 4295 // trypsin activity // inferred from electronic annotation /// 8236 // serine-type peptidase activity // non-traceable author statement /// 4252 //…	6508 // proteolysis // non-traceable author statement /// 7586 // digestion // non-traceable author statement /// 6508 // proteolysis // inferred from electronic annotation	---	IPR001254 // Peptidase S1, chymotrypsin // 1.1E-57
9387	150586_at	-1.54193	3.25108	-15.6419	2.17712e-16	1.51749e-14	27.2814	FBgn0039324	CG10553	CG10553	CG10553	43064	---	---	---	IPR004119 // Protein of unknown function DUF227 // 1.8E-95
7229	148428_at	-1.20933	2.91105	-15.5877	2.39875e-16	1.66369e-14	27.1834	FBgn0035933	CG13309	CG13309	CG13309	39012	8061 // chitin binding // inferred from electronic annotation	6030 // chitin metabolism // inferred from electronic annotation	5576 // extracellular region // inferred from electronic annotation	---
11374	152573_at	-1.31076	3.6154	-15.5054	2.78149e-16	1.91964e-14	27.0337	---	CG10096 /// CG10097	---	---	---	---	---	---	---
4850	146049_at	-1.70981	1.3537	-15.4569	3.03532e-16	2.08455e-14	26.9454	FBgn0032066	CG9463	CG9463	CG9463	34203	4559 // alpha-mannosidase activity // inferred from sequence or structural similarity /// 16799 // hydrolase activity, hydrolyzing N-glycosyl compounds // inferred from electronic annotation /// 4559 // alpha-mannosidase activity // inferred from electronic annotation /// 15923 // mannosidase activity // inferred from electronic annotation /// 16787 // hydrolase activity // inferred from electron…	5975 // carbohydrate metabolism // inferred from electronic annotation /// 6013 // mannose metabolism // inferred from electronic annotation	5764 // lysosome // inferred from sequence or structural similarity /// 5764 // lysosome // inferred from sequence similarity	IPR000602 // Glycoside hydrolase, family 38 // 1.0E-126
6466	147665_at	-1.85352	2.05608	-15.4084	3.31328e-16	2.25335e-14	26.8568	FBgn0034711	CG3290	CG3290	CG3290	37539	4035 // alkaline phosphatase activity // inferred from sequence or structural similarity /// 19204 // nucleotide phosphatase activity // inferred from electronic annotation /// 287 // magnesium ion binding // inferred from electronic annotation /// 8270 // zinc ion binding // inferred from electronic annotation /// 16787 // hydrolase activity // inferred from electronic annotation /// 4035 // alk…	1501 // skeletal development // inferred from electronic annotation /// 7498 // mesoderm development // inferred from electronic annotation /// 8152 // metabolism // inferred from electronic annotation	---	IPR001952 // Alkaline phosphatase // 8.0E-84
2462	143661_at	-0.820458	0.859319	-15.3626	3.60021e-16	2.43666e-14	26.7728	FBgn0011556	CG12387	Try	Trypsin	36216	4263 // chymotrypsin activity // inferred from electronic annotation /// 4295 // trypsin activity // inferred from sequence or structural similarity /// 4295 // trypsin activity // non-traceable author statement /// 5515 // protein binding // inferred from physical interaction /// 4252 // serine-type endopeptidase activity // inferred from electronic annotation /// 4295 // trypsin activity // inf…	6508 // proteolysis // non-traceable author statement /// 6508 // proteolysis // inferred from electronic annotation	5576 // extracellular region // non-traceable author statement	IPR001254 // Peptidase S1, chymotrypsin // 3.5E-74
1215	142414_at	-1.29362	3.6928	-15.334	3.79205e-16	2.55417e-14	26.7203	FBgn0039801	CG11315	CG11315	CG11315	43649	---	---	---	IPR003172 // E1 protein and Def2/Der2 allergen // 3.5E-45 /// IPR003172 // E1 protein and Def2/Der2 allergen // 4.1E-22 /// IPR003172 // E1 protein and Def2/Der2 allergen // 1.1E-5
4596	145795_at	-2.81898	3.11998	-15.3265	3.84366e-16	2.56453e-14	26.7066	FBgn0031653	CG8871	Jon25Biii	Jonah 25Biii	33706	4263 // chymotrypsin activity // inferred from electronic annotation /// 4295 // trypsin activity // inferred from electronic annotation /// 8236 // serine-type peptidase activity // inferred from electronic annotation /// 42708 // elastase activity // non-traceable author statement /// 4252 // serine-type endopeptidase activity // inferred from electronic annotation /// 8233 // peptidase activit…	6508 // proteolysis // non-traceable author statement /// 6508 // proteolysis // inferred from electronic annotation	---	IPR001254 // Peptidase S1, chymotrypsin // 1.0E-43
5609	146808_at	-1.18622	1.54836	-15.3265	3.84405e-16	2.56453e-14	26.7065	FBgn0033294	CG8693	CG8693	CG8693	35827	4556 // alpha-amylase activity // inferred from electronic annotation /// 4558 // alpha-glucosidase activity // inferred from sequence or structural similarity /// 5215 // transporter activity // inferred from electronic annotation /// 4558 // alpha-glucosidase activity // inferred from sequence similarity	5975 // carbohydrate metabolism // inferred from electronic annotation	---	IPR006047 // Alpha amylase, catalytic domain // 3.4E-123
5887	147086_at	-0.819808	0.743175	-15.3184	3.90089e-16	2.59012e-14	26.6917	FBgn0033723	CG13155	CG13155	CG13155	36346	---	---	---	---
4975	146174_s_at	-1.74996	3.97832	-15.2955	4.06698e-16	2.68766e-14	26.6495	FBgn0043825 /// FBgn0051872	CG31872 /// CG18284	CG18284 /// CG31872	CG18284 /// CG31872	34458 /// 34460	4806 // triacylglycerol lipase activity // inferred from sequence or structural similarity /// 16298 // lipase activity // inferred from electronic annotation /// 16298 // lipase activity // inferred from sequence or structural similarity /// 16787 // hydrolase activity // inferred from electronic annotation /// 3824 // catalytic activity // inferred from electronic annotation /// 16789 // carbox…	6629 // lipid metabolism // inferred from electronic annotation /// 6629 // lipid metabolism // inferred from sequence or structural similarity /// 16042 // lipid catabolism // inferred from electronic annotation /// 6629 // lipid metabolism // inferred from sequence similarity	---	IPR006693 // Ab-hydrolase associated lipase region // 1.3E-24 /// IPR006693 // Ab-hydrolase associated lipase region // 1.3E-23
5564	146763_at	-0.673826	0.581296	-15.2796	4.18621e-16	2.7406e-14	26.6203	FBgn0033216	CG1946	CG1946	CG1946	35720	---	---	---	IPR007130 // Diacylglycerol acyltransferase // 1.0E-126
4648	145847_at	-0.725029	0.970439	-15.2338	4.5513e-16	2.96575e-14	26.5357	FBgn0031741	CG11034	CG11034	CG11034	33810	4274 // dipeptidyl-peptidase IV activity // inferred from sequence or structural similarity /// 4274 // dipeptidyl-peptidase IV activity // inferred from sequence similarity	6508 // proteolysis // inferred from electronic annotation /// 7166 // cell surface receptor linked signal transduction // inferred from electronic annotation	16020 // membrane // inferred from electronic annotation	IPR001375 // Peptidase S9, prolyl oligopeptidase active site region // 2.5E-17 /// IPR002469 // Peptidase S9B, dipeptidylpeptidase IV N-terminal // 2.6E-60 /// IPR002469 // Peptidase S9B, dipeptidylpeptidase IV N-terminal // 1.2E-16
4213	145412_at	-1.00418	2.29472	-15.1417	5.38603e-16	3.47734e-14	26.3653	FBgn0031087	CG12656	CG12656	CG12656	33011	5515 // protein binding // inferred from physical interaction	---	---	---
7066	148265_at	-1.00733	1.70224	-15.1419	5.38379e-16	3.47734e-14	26.3657	FBgn0035679	CG10467	CG10467	CG10467	38697	4034 // aldose 1-epimerase activity // inferred from sequence or structural similarity /// 4034 // aldose 1-epimerase activity // inferred from electronic annotation /// 4034 // aldose 1-epimerase activity // inferred from sequence similarity	5996 // monosaccharide metabolism // inferred from electronic annotation /// 6012 // galactose metabolism // inferred from electronic annotation	---	IPR008183 // Aldose 1-epimerase // 1.0E-126
11642	152841_at	-1.09938	1.66057	-15.1345	5.45763e-16	3.50741e-14	26.352	FBgn0038774	CG5023	CG5023	CG5023	42400	3779 // actin binding // inferred from sequence or structural similarity /// 5200 // structural constituent of cytoskeleton // inferred from electronic annotation /// 3779 // actin binding // inferred from electronic annotation /// 3779 // actin binding // inferred from sequence similarity	6936 // muscle contraction // inferred from electronic annotation /// 6939 // smooth muscle contraction // inferred from electronic annotation /// 31032 // actomyosin structure organization and biogenesis // inferred from electronic annotation	---	IPR001715 // Calponin-like actin-binding // 2.1E-22 /// IPR000557 // Calponin repeat // 8.5E-6
6856	148055_at	-1.33259	2.94057	-15.1314	5.48908e-16	3.51151e-14	26.3462	FBgn0035356	CG16986	CG16986	CG16986	38325	3824 // catalytic activity // inferred from electronic annotation	---	---	IPR006683 // Thioesterase superfamily // 2.5E-17
1208	142407_at	-0.874777	1.84807	-15.1229	5.57512e-16	3.55034e-14	26.3304	FBgn0036622	CG4753	CG4753	CG4753	39819	3841 // 1-acylglycerol-3-phosphate O-acyltransferase activity // inferred from sequence or structural similarity /// 8415 // acyltransferase activity // inferred from electronic annotation /// 3841 // 1-acylglycerol-3-phosphate O-acyltransferase activity // inferred from sequence similarity	8152 // metabolism // inferred from electronic annotation	---	IPR002123 // Phospholipid/glycerol acyltransferase // 8.0E-9
12148	153347_at	-1.29665	3.74132	-15.1194	5.61081e-16	3.5569e-14	26.324	FBgn0001128	CG9042	Gpdh	Glycerol 3 phosphate dehydrogenase	33824	4367 // glycerol-3-phosphate dehydrogenase (NAD+) activity // inferred from sequence or structural similarity /// 4367 // glycerol-3-phosphate dehydrogenase (NAD+) activity // non-traceable author statement /// 4367 // glycerol-3-phosphate dehydrogenase (NAD+) activity // inferred from electronic annotation /// 16491 // oxidoreductase activity // inferred from electronic annotation /// 16614 // o…	5975 // carbohydrate metabolism // inferred from electronic annotation /// 6072 // glycerol-3-phosphate metabolism // inferred from sequence or structural similarity /// 6127 // glycerophosphate shuttle // non-traceable author statement /// 6629 // lipid metabolism // inferred from electronic annotation /// 6072 // glycerol-3-phosphate metabolism // inferred from electronic annotation /// 46168 /…	5737 // cytoplasm // non-traceable author statement /// 9331 // glycerol-3-phosphate dehydrogenase complex // inferred from electronic annotation /// 5737 // cytoplasm // inferred from electronic annotation	IPR006168 // NAD-dependent glycerol-3-phosphate dehydrogenase // 1.0E-126
1672	142871_s_at	-0.868908	2.80158	-15.1093	5.71611e-16	3.60733e-14	26.3051	FBgn0030734	CG9911	CG9911	CG9911	32588	3756 // protein disulfide isomerase activity // inferred from electronic annotation /// 3756 // protein disulfide isomerase activity // inferred from sequence or structural similarity /// 5515 // protein binding // inferred from physical interaction /// 3756 // protein disulfide isomerase activity // inferred from sequence similarity	6118 // electron transport // inferred from electronic annotation /// 6464 // protein modification // inferred from electronic annotation	---	IPR006662 // Thioredoxin type domain // 3.3E-17 /// IPR006662 // Thioredoxin type domain // 2.3E-17
219	141418_at	-2.22071	3.59773	-15.07	6.14467e-16	3.82608e-14	26.232	FBgn0036024	CG18180	CG18180	CG18180	39125	4263 // chymotrypsin activity // non-traceable author statement /// 4295 // trypsin activity // inferred from electronic annotation /// 4252 // serine-type endopeptidase activity // inferred from electronic annotation	6508 // proteolysis // non-traceable author statement /// 6508 // proteolysis // inferred from electronic annotation	---	IPR001254 // Peptidase S1, chymotrypsin // 4.4E-46
3648	144847_at	-1.12958	1.66084	-15.0356	6.54672e-16	4.04051e-14	26.1679	FBgn0030264	CG1961	CG1961	CG1961	32043	8081 // phosphoric diester hydrolase activity // inferred from electronic annotation /// 8253 // 5'-nucleotidase activity // inferred from sequence or structural similarity /// 19204 // nucleotide phosphatase activity // inferred from electronic annotation /// 16787 // hydrolase activity // inferred from electronic annotation /// 8253 // 5'-nucleotidase activity // inferred from sequence similari…	6139 // nucleobase, nucleoside, nucleotide and nucleic acid metabolism // inferred from electronic annotation /// 9166 // nucleotide catabolism // inferred from electronic annotation	---	IPR004843 // Metallo-phosphoesterase // 2.4E-15 /// IPR008334 // 5-Nucleotidase, C-terminal // 6.4E-66
8370	149569_at	-0.83773	2.63244	-15.0281	6.63776e-16	4.07873e-14	26.1539	FBgn0037715	CG9399	CG9399	CG9399	41157	5515 // protein binding // inferred from physical interaction	---	---	IPR005336 // Protein of unknown function UPF0041 // 3.0E-42
2691	143890_at	-1.04974	1.60921	-15.0183	6.75887e-16	4.11704e-14	26.1356	FBgn0017448	CG2187	CG2187	CG2187	43743	8324 // cation transporter activity // inferred from electronic annotation /// 8507 // sodium:iodide symporter activity // inferred from sequence or structural similarity /// 5215 // transporter activity // inferred from electronic annotation /// 8507 // sodium:iodide symporter activity // inferred from sequence similarity	6732 // coenzyme metabolism // inferred from electronic annotation /// 6812 // cation transport // inferred from electronic annotation /// 6858 // extracellular transport // inferred from electronic annotation /// 51189 // prosthetic group metabolism // inferred from electronic annotation /// 6810 // transport // inferred from electronic annotation /// 6811 // ion transport // inferred from elect…	16020 // membrane // inferred from electronic annotation /// 16021 // integral to membrane // inferred from electronic annotation	IPR001734 // Na+/solute symporter // 1.6E-11 /// IPR001734 // Na+/solute symporter // 8.9E-6
5393	146592_at	-0.815826	1.15683	-14.9991	7.00343e-16	4.24754e-14	26.0996	FBgn0016919	CG12548	nompB	no mechanoreceptor potential B	35414	---	7605 // sensory perception of sound // inferred from mutant phenotype /// 9296 // flagellum biogenesis // inferred from mutant phenotype /// 35058 // sensory cilium biogenesis // inferred from mutant phenotype /// 42073 // intraflagellar transport // non-traceable author statement	---	---
991	142190_at	-0.845849	2.03891	-14.9711	7.3746e-16	4.43425e-14	26.0474	FBgn0033981	CG10247	Cyp6a21	Cyp6a21	36665	4497 // monooxygenase activity // inferred from electronic annotation /// 16491 // oxidoreductase activity // inferred from electronic annotation /// 5506 // iron ion binding // inferred from electronic annotation /// 20037 // heme binding // inferred from electronic annotation /// 46872 // metal ion binding // inferred from electronic annotation	6118 // electron transport // inferred from electronic annotation /// 8202 // steroid metabolism // inferred from electronic annotation	5792 // microsome // non-traceable author statement /// 16020 // membrane // non-traceable author statement /// 16020 // membrane // inferred from electronic annotation	IPR001128 // Cytochrome P450 // 2.5E-120
13778	154977_at	-0.781606	1.68242	-14.9523	7.63586e-16	4.57172e-14	26.0122	FBgn0030306	CG1751	CG1751	CG1751	32095	9003 // signal peptidase activity // inferred from sequence or structural similarity /// 9003 // signal peptidase activity // non-traceable author statement /// 8233 // peptidase activity // inferred from electronic annotation /// 9003 // signal peptidase activity // inferred from electronic annotation /// 16787 // hydrolase activity // inferred from electronic annotation /// 9003 // signal pepti…	6465 // signal peptide processing // inferred from sequence or structural similarity /// 6508 // proteolysis // inferred from electronic annotation /// 6465 // signal peptide processing // inferred from electronic annotation /// 6465 // signal peptide processing // inferred from sequence similarity	5787 // signal peptidase complex // inferred from sequence or structural similarity /// 5792 // microsome // inferred from electronic annotation /// 16021 // integral to membrane // non-traceable author statement /// 5783 // endoplasmic reticulum // inferred from electronic annotation /// 5787 // signal peptidase complex // inferred from electronic annotation /// 16020 // membrane // inferred fro…	IPR009582 // Microsomal signal peptidase 25 kDa subunit // 6.9E-118
11449	152648_at	-1.22975	3.28686	-14.8926	8.52954e-16	5.08506e-14	25.9002	FBgn0035090	CG2736	CG2736	CG2736	37998	5044 // scavenger receptor activity // non-traceable author statement	6952 // defense response // non-traceable author statement /// 7155 // cell adhesion // inferred from electronic annotation	5887 // integral to plasma membrane // non-traceable author statement /// 16020 // membrane // inferred from electronic annotation	IPR002159 // CD36 antigen // 3.2E-17
4681	145880_at	-0.899726	0.433052	-14.882	8.699e-16	5.16411e-14	25.8802	FBgn0026755	CG9481	Ugt37b1	UDP-glycosyltransferase 37b1	53584	15020 // glucuronosyltransferase activity // inferred from sequence or structural similarity /// 16758 // transferase activity, transferring hexosyl groups // inferred from electronic annotation /// 15020 // glucuronosyltransferase activity // inferred from sequence similarity	5976 // polysaccharide metabolism // inferred from electronic annotation /// 6952 // defense response // inferred from electronic annotation /// 8202 // steroid metabolism // inferred from electronic annotation /// 9636 // response to toxin // inferred from electronic annotation /// 8152 // metabolism // inferred from electronic annotation	---	IPR002213 // UDP-glucoronosyl/UDP-glucosyl transferase // 5.3E-42
9698	150897_at	-0.77811	1.3795	-14.8595	9.07085e-16	5.36213e-14	25.8379	FBgn0039783	CG9720	PH4NE2	prolyl-4-hydroxylase-alpha NE2	43628	4656 // procollagen-proline 4-dioxygenase activity // inferred from sequence or structural similarity /// 5488 // binding // inferred from electronic annotation /// 5506 // iron ion binding // inferred from electronic annotation /// 16491 // oxidoreductase activity // inferred from electronic annotation /// 16702 // oxidoreductase activity, acting on single donors with incorporation of molecular …	18401 // peptidyl-proline hydroxylation to 4-hydroxy-L-proline // inferred from sequence or structural similarity /// 19538 // protein metabolism // inferred from electronic annotation /// 18401 // peptidyl-proline hydroxylation to 4-hydroxy-L-proline // inferred from sequence similarity	16222 // procollagen-proline, 2-oxoglutarate-4-dioxygenase complex // Unknown /// 5783 // endoplasmic reticulum // inferred from electronic annotation /// 16222 // procollagen-proline, 2-oxoglutarate-4-dioxygenase complex // inferred from curator	IPR005123 // 2OG-Fe(II) oxygenase superfamily // 1.4E-7
10807	152006_at	-2.09152	3.71831	-14.8426	9.36162e-16	5.51077e-14	25.8059	FBgn0035670	CG10472	CG10472	CG10472	38688	4252 // serine-type endopeptidase activity // inferred from sequence or structural similarity /// 4263 // chymotrypsin activity // non-traceable author statement /// 4295 // trypsin activity // inferred from electronic annotation /// 5515 // protein binding // inferred from physical interaction /// 4252 // serine-type endopeptidase activity // inferred from electronic annotation /// 8233 // pepti…	6508 // proteolysis // non-traceable author statement /// 6508 // proteolysis // inferred from electronic annotation	---	IPR001254 // Peptidase S1, chymotrypsin // 2.5E-70
6713	147912_at	-1.20228	2.3151	-14.8332	9.52594e-16	5.56077e-14	25.7883	FBgn0035112	CG13877	CG13877	CG13877	38036	---	---	---	---
10580	151779_at	-0.947834	2.54368	-14.8336	9.52038e-16	5.56077e-14	25.7889	FBgn0032029	CG17292	CG17292	CG17292	34152	4806 // triacylglycerol lipase activity // inferred from sequence or structural similarity /// 5515 // protein binding // inferred from physical interaction /// 3824 // catalytic activity // inferred from electronic annotation /// 4806 // triacylglycerol lipase activity // inferred from sequence similarity	6629 // lipid metabolism // inferred from electronic annotation	---	IPR000734 // Lipase // 1.2E-30
4832	146031_at	-1.17371	3.39979	-14.8077	9.99056e-16	5.78379e-14	25.7401	FBgn0040098	CG17799	lectin-29Ca	lectin-29Ca	53547	5534 // galactose binding // inferred from sequence or structural similarity /// 5534 // galactose binding // inferred from sequence similarity	7283 // spermatogenesis // inferred from electronic annotation	---	IPR001304 // C-type lectin // 3.9E-5
5989	147188_at	-0.606684	0.334093	-14.7707	1.07051e-15	6.17195e-14	25.6702	FBgn0033904	CG18327	CG18327	CG18327	36567	5386 // carrier activity // inferred from sequence or structural similarity /// 5488 // binding // inferred from electronic annotation /// 5215 // transporter activity // inferred from electronic annotation /// 5386 // carrier activity // inferred from sequence similarity	6810 // transport // inferred from electronic annotation	5740 // mitochondrial envelope // inferred from sequence or structural similarity /// 5743 // mitochondrial inner membrane // inferred from electronic annotation /// 16020 // membrane // inferred from electronic annotation /// 16021 // integral to membrane // inferred from electronic annotation /// 5740 // mitochondrial envelope // inferred from sequence similarity	IPR001993 // Mitochondrial substrate carrier // 4.1E-18 /// IPR001993 // Mitochondrial substrate carrier // 7.4E-23 /// IPR001993 // Mitochondrial substrate carrier // 5.7E-25
9331	150530_at	-0.69365	1.3686	-14.7253	1.16533e-15	6.69111e-14	25.5843	---	---	---	---	---	---	---	---	---
4991	146190_at	-1.14812	1.66799	-14.7163	1.18519e-15	6.77738e-14	25.5672	FBgn0032297	CG17124	CG17124	CG17124	34485	4864 // protein phosphatase inhibitor activity // non-traceable author statement /// 5515 // protein binding // inferred from physical interaction	---	---	---
11765	152964_at	-0.764872	2.04103	-14.697	1.22881e-15	6.99824e-14	25.5306	FBgn0033915	CG8485	CG8485	CG8485	36579	4674 // protein serine/threonine kinase activity // non-traceable author statement /// 5524 // ATP binding // inferred from electronic annotation /// 16909 // SAP kinase activity // inferred from sequence or structural similarity /// 166 // nucleotide binding // inferred from electronic annotation /// 4672 // protein kinase activity // inferred from electronic annotation /// 4674 // protein serin…	6468 // protein amino acid phosphorylation // non-traceable author statement /// 6468 // protein amino acid phosphorylation // inferred from electronic annotation	---	IPR000719 // Protein kinase // 2.4E-88
11586	152785_at	-0.795956	1.11645	-14.662	1.31248e-15	7.44449e-14	25.4639	FBgn0034500	CG11200	CG11200	CG11200	37301	4090 // carbonyl reductase (NADPH) activity // inferred from sequence or structural similarity /// 5515 // protein binding // inferred from physical interaction /// 16491 // oxidoreductase activity // inferred from electronic annotation /// 4090 // carbonyl reductase (NADPH) activity // inferred from sequence similarity	8152 // metabolism // inferred from electronic annotation	---	IPR002198 // Short-chain dehydrogenase/reductase SDR // 1.4E-36
5524	146723_at	-0.766531	1.14836	-14.6486	1.34583e-15	7.60284e-14	25.4386	---	---	---	---	---	---	---	---	---
2627	143826_at	-1.24684	3.28914	-14.625	1.40712e-15	7.90897e-14	25.3935	FBgn0015585	CG10852	Acp63F	Accessory gland peptide 63F	38448	---	7582 // physiological process // non-traceable author statement /// 45297 // post-mating behavior // non-traceable author statement /// 7610 // behavior // inferred from electronic annotation	---	---
9756	150955_at	-1.66361	2.29655	-14.6191	1.42258e-15	7.94037e-14	25.3824	FBgn0039873	CG2191	CG2191	CG2191	43744	8324 // cation transporter activity // inferred from electronic annotation /// 8523 // sodium-dependent multivitamin transporter activity // inferred from sequence or structural similarity /// 5215 // transporter activity // inferred from electronic annotation /// 8523 // sodium-dependent multivitamin transporter activity // inferred from sequence similarity	6732 // coenzyme metabolism // inferred from electronic annotation /// 6812 // cation transport // inferred from electronic annotation /// 6858 // extracellular transport // inferred from electronic annotation /// 51189 // prosthetic group metabolism // inferred from electronic annotation /// 6810 // transport // inferred from electronic annotation /// 6811 // ion transport // inferred from elect…	16020 // membrane // inferred from electronic annotation /// 16021 // integral to membrane // inferred from electronic annotation	IPR001734 // Na+/solute symporter // 1.7E-10 /// IPR001734 // Na+/solute symporter // 3.1E-6
10620	151819_at	-0.827016	2.05454	-14.5167	1.72618e-15	9.59671e-14	25.1866	FBgn0038878	CG3301	CG3301	CG3301	42528	16616 // oxidoreductase activity, acting on the CH-OH group of donors, NAD or NADP as acceptor // inferred from sequence or structural similarity /// 42802 // identical protein binding // inferred from physical interaction /// 16491 // oxidoreductase activity // inferred from electronic annotation /// 16616 // oxidoreductase activity, acting on the CH-OH group of donors, NAD or NADP as acceptor /…	8152 // metabolism // inferred from electronic annotation	---	IPR002198 // Short-chain dehydrogenase/reductase SDR // 3.2E-36
9533	150732_at	-1.15677	1.88467	-14.4924	1.80742e-15	1.00087e-13	25.14	FBgn0039519	CG13977	Cyp6a18	Cyp6a18	43304	4497 // monooxygenase activity // inferred from electronic annotation /// 16491 // oxidoreductase activity // inferred from electronic annotation /// 5506 // iron ion binding // inferred from electronic annotation /// 20037 // heme binding // inferred from electronic annotation /// 46872 // metal ion binding // inferred from electronic annotation	6118 // electron transport // inferred from electronic annotation /// 8202 // steroid metabolism // inferred from electronic annotation	5792 // microsome // non-traceable author statement /// 16020 // membrane // non-traceable author statement /// 5783 // endoplasmic reticulum // inferred from electronic annotation /// 5792 // microsome // inferred from electronic annotation /// 16020 // membrane // inferred from electronic annotation	IPR001128 // Cytochrome P450 // 1.0E-126
11595	152794_at	-1.47986	1.9592	-14.4828	1.8408e-15	1.01534e-13	25.1215	FBgn0035781	CG8560	CG8560	CG8560	38830	4180 // carboxypeptidase activity // non-traceable author statement /// 4182 // carboxypeptidase A activity // inferred from electronic annotation /// 4180 // carboxypeptidase activity // inferred from electronic annotation	6508 // proteolysis // inferred from electronic annotation	---	IPR000834 // Peptidase M14, carboxypeptidase A // 1.8E-71
5627	146826_at	-1.14218	0.190411	-14.435	2.01561e-15	1.1074e-13	25.0296	FBgn0001285	CG8579	Jon44E	Jonah 44E	35853	4263 // chymotrypsin activity // inferred from sequence or structural similarity /// 4263 // chymotrypsin activity // non-traceable author statement /// 4295 // trypsin activity // inferred from electronic annotation /// 4252 // serine-type endopeptidase activity // inferred from electronic annotation /// 8233 // peptidase activity // inferred from electronic annotation /// 16787 // hydrolase act…	6508 // proteolysis // non-traceable author statement /// 6508 // proteolysis // inferred from electronic annotation	---	IPR001254 // Peptidase S1, chymotrypsin // 2.0E-64
1667	142866_at	-0.750804	1.61028	-14.4264	2.04891e-15	1.1213e-13	25.013	FBgn0038665	CG12269	CG12269	CG12269	42271	5515 // protein binding // inferred from physical interaction /// 3735 // structural constituent of ribosome // inferred from electronic annotation /// 3906 // DNA-(apurinic or apyrimidinic site) lyase activity // inferred from electronic annotation /// 16829 // lyase activity // inferred from electronic annotation /// 3735 // structural constituent of ribosome // non-traceable author statement /…	6281 // DNA repair // inferred from electronic annotation /// 6414 // translational elongation // inferred from electronic annotation /// 6974 // response to DNA damage stimulus // inferred from electronic annotation /// 42254 // ribosome biogenesis and assembly // inferred from electronic annotation /// 6412 // protein biosynthesis // non-traceable author statement	5622 // intracellular // inferred from electronic annotation /// 5634 // nucleus // inferred from electronic annotation /// 5840 // ribosome // inferred from electronic annotation /// 30529 // ribonucleoprotein complex // inferred from electronic annotation /// 5830 // cytosolic ribosome (sensu Eukaryota) // non-traceable author statement	---
11989	153188_at	-0.700907	3.11214	-14.4094	2.11647e-15	1.14929e-13	24.9802	FBgn0026567	CG2358	CG2358	CG2358	40815	8236 // serine-type peptidase activity // inferred from electronic annotation /// 9003 // signal peptidase activity // inferred from sequence or structural similarity /// 8233 // peptidase activity // inferred from electronic annotation /// 9003 // signal peptidase activity // inferred from sequence similarity	6465 // signal peptide processing // inferred from sequence or structural similarity /// 6508 // proteolysis // inferred from electronic annotation /// 6465 // signal peptide processing // inferred from electronic annotation /// 6465 // signal peptide processing // inferred from sequence similarity	5787 // signal peptidase complex // inferred from sequence or structural similarity /// 16020 // membrane // inferred from electronic annotation /// 5787 // signal peptidase complex // inferred from sequence similarity	IPR000508 // Peptidase S26, signal peptidase I // 4.1E-51
170	141369_at	-3.1672	1.47211	-14.3601	2.3249e-15	1.2576e-13	24.8851	FBgn0039778	CG18030	Jon99Fi	Jonah 99Fi	43622	4252 // serine-type endopeptidase activity // non-traceable author statement /// 4263 // chymotrypsin activity // inferred from electronic annotation /// 4295 // trypsin activity // inferred from electronic annotation /// 3700 // transcription factor activity // inferred from mutant phenotype /// 4252 // serine-type endopeptidase activity // inferred from electronic annotation /// 8233 // peptida…	6508 // proteolysis // inferred from electronic annotation /// 2168 // larval development (sensu Insecta) // inferred from mutant phenotype /// 7591 // molting cycle (sensu Insecta) // inferred from mutant phenotype	5634 // nucleus // inferred from direct assay	IPR001254 // Peptidase S1, chymotrypsin // 3.7E-55
12383	153582_at	-0.822206	1.96147	-14.358	2.33443e-15	1.2579e-13	24.8809	FBgn0032084	CG13101	CG13101	CG13101	34221	---	7275 // development // inferred from electronic annotation /// 7498 // mesoderm development // inferred from electronic annotation /// 7517 // muscle development // inferred from electronic annotation	---	---
11163	152362_at	-1.81461	4.13732	-14.3421	2.40619e-15	1.2916e-13	24.8503	FBgn0011559	CG7157	Acp36DE	Accessory gland peptide 36DE	35096	5179 // hormone activity // non-traceable author statement	7321 // sperm displacement // non-traceable author statement /// 42628 // mating plug formation // traceable author statement /// 45434 // negative regulation of female receptivity, post-mating // non-traceable author statement /// 46692 // sperm competition // traceable author statement /// 46693 // sperm storage // inferred from mutant phenotype /// 46693 // sperm storage // traceable author st…	5576 // extracellular region // non-traceable author statement /// 5576 // extracellular region // traceable author statement	---
13039	154238_at	-1.50664	1.43497	-14.3339	2.44415e-15	1.30697e-13	24.8344	FBgn0011763	CG4654	Dp	DP transcription factor	36461	3677 // DNA binding // inferred from direct assay /// 3700 // transcription factor activity // inferred from electronic annotation /// 3702 // RNA polymerase II transcription factor activity // non-traceable author statement /// 3704 // specific RNA polymerase II transcription factor activity // non-traceable author statement /// 5515 // protein binding // inferred from physical interaction /// 3…	74 // regulation of progression through cell cycle // inferred from mutant phenotype /// 74 // regulation of progression through cell cycle // non-traceable author statement /// 6357 // regulation of transcription from RNA polymerase II promoter // non-traceable author statement /// 7049 // cell cycle // inferred from mutant phenotype /// 7113 // endomitotic cell cycle // traceable author stateme…	5634 // nucleus // non-traceable author statement /// 5667 // transcription factor complex // inferred from electronic annotation /// 31523 // Myb complex // inferred from direct assay /// 35189 // Rb-E2F complex // inferred from direct assay /// 5634 // nucleus // inferred from electronic annotation	IPR003316 // Transcription factor E2F/dimerisation partner (TDP) // 1.0E-126 /// IPR003316 // Transcription factor E2F/dimerisation partner (TDP) // 1.0E-126
7479	148678_at	-0.998393	1.54758	-14.3306	2.45954e-15	1.3102e-13	24.8281	FBgn0036321	CG14120	CG14120	CG14120	39463	---	---	---	IPR001604 // DNA/RNA non-specific endonuclease // 7.9E-29 /// IPR001604 // DNA/RNA non-specific endonuclease // 1.8E-14 /// IPR001604 // DNA/RNA non-specific endonuclease // 5.3E-34
9283	150482_at	-1.34302	1.34264	-14.3025	2.5956e-15	1.37744e-13	24.7735	FBgn0039151	CG13607	CG13607	CG13607	42859	---	---	---	---
7935	149134_at	-1.04379	2.55981	-14.2205	3.03757e-15	1.6059e-13	24.6143	FBgn0037004	CG17637	CG17637	CG17637	40275	15144 // carbohydrate transporter activity // inferred from sequence or structural similarity /// 15520 // tetracycline:hydrogen antiporter activity // inferred from electronic annotation /// 15144 // carbohydrate transporter activity // inferred from sequence similarity	5975 // carbohydrate metabolism // inferred from electronic annotation /// 8643 // carbohydrate transport // inferred from electronic annotation /// 15904 // tetracycline transport // inferred from electronic annotation	16021 // integral to membrane // inferred from electronic annotation	---
2713	143912_at	-1.01638	3.63405	-14.1333	3.59367e-15	1.88567e-13	24.444	FBgn0020236	CG8322	ATPCL	ATP citrate lyase	36760	3878 // ATP citrate synthase activity // inferred from sequence or structural similarity /// 3878 // ATP citrate synthase activity // non-traceable author statement /// 16829 // lyase activity // inferred from electronic annotation /// 3824 // catalytic activity // inferred from electronic annotation /// 3878 // ATP citrate synthase activity // inferred from sequence similarity	6085 // acetyl-CoA biosynthesis // inferred from sequence or structural similarity /// 6099 // tricarboxylic acid cycle // inferred from electronic annotation /// 6101 // citrate metabolism // inferred from sequence or structural similarity /// 8152 // metabolism // inferred from electronic annotation /// 6085 // acetyl-CoA biosynthesis // inferred from sequence similarity /// 6101 // citrate met…	5737 // cytoplasm // inferred from sequence or structural similarity /// 5737 // cytoplasm // inferred from sequence similarity	IPR003781 // CoA-binding domain // 2.1E-15 /// IPR005811 // ATP-citrate lyase/succinyl-CoA ligase // 4.7E-47 /// IPR003781 // CoA-binding domain // 4.8E-21 /// IPR005811 // ATP-citrate lyase/succinyl-CoA ligase // 4.7E-47
2264	143463_at	-1.64181	1.06014	-14.0468	4.24921e-15	2.21306e-13	24.2743	FBgn0004414	CG14560	msopa	male-specific opa containing gene	45962	---	6952 // defense response // inferred from sequence or structural similarity /// 6952 // defense response // inferred from sequence similarity	---	---
11323	152522_at	-1.39777	2.57121	-14.0113	4.55183e-15	2.35318e-13	24.2046	FBgn0032122	CG31883	CG31883	CG31883	326169	8061 // chitin binding // inferred from electronic annotation	6030 // chitin metabolism // inferred from electronic annotation	5576 // extracellular region // inferred from electronic annotation	---
6704	147903_at	-1.02505	1.92649	-13.9749	4.8861e-15	2.5167e-13	24.1328	FBgn0035089	CG9358	Phk-3	Pherokine 3	37997	4672 // protein kinase activity // non-traceable author statement /// 4674 // protein serine/threonine kinase activity // inferred from sequence or structural similarity /// 4674 // protein serine/threonine kinase activity // non-traceable author statement /// 5386 // carrier activity // inferred from electronic annotation /// 19992 // diacylglycerol binding // inferred from sequence or structura…	6468 // protein amino acid phosphorylation // non-traceable author statement /// 7165 // signal transduction // inferred from mutant phenotype /// 7265 // Ras protein signal transduction // traceable author statement /// 7283 // spermatogenesis // inferred from mutant phenotype /// 7362 // terminal region determination // inferred from mutant phenotype /// 7362 // terminal region determination //…	5737 // cytoplasm // traceable author statement /// 19897 // extrinsic to plasma membrane // traceable author statement	IPR005055 // Insect pheromone-binding family A10/OS-D // 2.8E-77
2974	144173_at	-0.722477	2.25942	-13.9512	5.11716e-15	2.62606e-13	24.086	FBgn0027106	CG2977	inx7	innexin 7	33027	5243 // gap-junction forming channel activity // inferred from sequence or structural similarity /// 15286 // innexin channel activity // non-traceable author statement /// 5515 // protein binding // inferred from physical interaction /// 15286 // innexin channel activity // inferred from expression pattern /// 5243 // gap-junction forming channel activity // inferred from sequence similarity	7165 // signal transduction // inferred from electronic annotation /// 381 // regulation of alternative nuclear mRNA splicing, via spliceosome // inferred from mutant phenotype /// 6727 // ommochrome biosynthesis // inferred from mutant phenotype /// 6810 // transport // inferred from electronic annotation /// 6886 // intracellular protein transport // inferred from electronic annotation /// 6901…	5921 // gap junction // inferred from sequence or structural similarity /// 5921 // gap junction // non-traceable author statement /// 16021 // integral to membrane // non-traceable author statement /// 5921 // gap junction // inferred from expression pattern /// 30125 // clathrin vesicle coat // inferred from electronic annotation /// 5921 // gap junction // inferred from electronic annotation /…	IPR000990 // Innexin // 6.9E-14 /// IPR000990 // Innexin // 9.7E-23 /// IPR000990 // Innexin // 4.4E-27 /// IPR000990 // Innexin // 9.7E-23
11320	152519_at	-0.777438	2.44705	-13.9444	5.18517e-15	2.65125e-13	24.0726	FBgn0033764	CG8776	CG8776	CG8776	36395	8805 // carbon-monoxide oxygenase activity // inferred from sequence or structural similarity /// 5515 // protein binding // inferred from physical interaction /// 4359 // glutaminase activity // inferred from electronic annotation /// 5509 // calcium ion binding // inferred from electronic annotation /// 3824 // catalytic activity // inferred from electronic annotation /// 51287 // NAD binding /…	6118 // electron transport // inferred from electronic annotation /// 7613 // memory // inferred from mutant phenotype /// 7626 // locomotory behavior // inferred from mutant phenotype /// 6541 // glutamine metabolism // inferred from electronic annotation /// 9225 // nucleotide-sugar metabolism // inferred from electronic annotation	16021 // integral to membrane // inferred from electronic annotation /// 30133 // transport vesicle // inferred from sequence or structural similarity /// 30133 // transport vesicle // inferred from sequence similarity	IPR004877 // Cytochrome b561 // 5.1E-101 /// IPR004877 // Cytochrome b561 // 2.6E-93 /// IPR004877 // Cytochrome b561 // 5.1E-101
4281	145480_at	-1.00451	0.871207	-13.9419	5.21116e-15	2.65485e-13	24.0676	FBgn0031182	CG1644	Cyp6t1	Cyp6t1	33127	4497 // monooxygenase activity // inferred from electronic annotation /// 16491 // oxidoreductase activity // inferred from electronic annotation /// 5506 // iron ion binding // inferred from electronic annotation /// 20037 // heme binding // inferred from electronic annotation /// 46872 // metal ion binding // inferred from electronic annotation	6118 // electron transport // inferred from electronic annotation	5792 // microsome // non-traceable author statement /// 16020 // membrane // non-traceable author statement /// 5783 // endoplasmic reticulum // inferred from electronic annotation /// 5792 // microsome // inferred from electronic annotation /// 16020 // membrane // inferred from electronic annotation	IPR001128 // Cytochrome P450 // 1.1E-66
11122	152321_at	-0.707017	0.984818	-13.9387	5.2439e-15	2.66185e-13	24.0612	FBgn0038752	CG4462	CG4462	CG4462	42376	8513 // organic cation porter activity // inferred from sequence or structural similarity /// 8513 // organic cation porter activity // inferred from sequence similarity	6812 // cation transport // inferred from electronic annotation /// 6858 // extracellular transport // inferred from electronic annotation	---	---
4963	146162_at	-0.926355	1.96553	-13.8839	5.8357e-15	2.9304e-13	23.9529	FBgn0032253	CG5322	CG5322	CG5322	34436	4559 // alpha-mannosidase activity // inferred from sequence or structural similarity /// 16799 // hydrolase activity, hydrolyzing N-glycosyl compounds // inferred from electronic annotation /// 4559 // alpha-mannosidase activity // inferred from sequence similarity	5975 // carbohydrate metabolism // inferred from electronic annotation	5764 // lysosome // inferred from sequence or structural similarity /// 5764 // lysosome // inferred from sequence similarity	IPR000602 // Glycoside hydrolase, family 38 // 1.0E-126
6129	147328_at	-1.55126	3.74396	-13.8841	5.83417e-15	2.9304e-13	23.9532	FBgn0034153	CG15616	Acp53C14b	Acp53C14b	36873	---	---	---	---
10897	152096_at	-1.03422	1.76912	-13.8611	6.10304e-15	3.0537e-13	23.9075	FBgn0036367	CG10116	CG10116	CG10116	39515	4465 // lipoprotein lipase activity // inferred from sequence or structural similarity /// 3824 // catalytic activity // inferred from electronic annotation /// 4465 // lipoprotein lipase activity // inferred from sequence similarity	6644 // phospholipid metabolism // inferred from electronic annotation /// 7292 // female gamete generation // inferred from electronic annotation /// 6629 // lipid metabolism // inferred from electronic annotation	---	IPR000734 // Lipase // 9.7E-27
9500	150699_at	-1.61027	2.25955	-13.8506	6.22897e-15	3.10562e-13	23.8868	FBgn0039471	CG6295	CG6295	CG6295	43247	4806 // triacylglycerol lipase activity // inferred from sequence or structural similarity /// 8970 // phospholipase A1 activity // inferred from electronic annotation /// 3824 // catalytic activity // inferred from electronic annotation /// 4806 // triacylglycerol lipase activity // inferred from sequence similarity	6629 // lipid metabolism // inferred from electronic annotation	---	IPR000734 // Lipase // 5.1E-49
11062	152261_at	-1.07178	3.59981	-13.8052	6.8103e-15	3.38342e-13	23.7964	FBgn0027844	CG7820	CAH1	Carbonic anhydrase 1	34786	4089 // carbonate dehydratase activity // inferred from sequence or structural similarity /// 8270 // zinc ion binding // inferred from electronic annotation /// 4089 // carbonate dehydratase activity // inferred from electronic annotation /// 4089 // carbonate dehydratase activity // inferred from sequence similarity	6730 // one-carbon compound metabolism // inferred from electronic annotation	---	IPR001148 // Carbonic anhydrase, eukaryotic // 1.9E-104
8395	149594_at	-0.791003	2.50742	-13.7589	7.4596e-15	3.67989e-13	23.7042	FBgn0037764	CG9459	CG9459	CG9459	41213	8415 // acyltransferase activity // inferred from electronic annotation /// 16740 // transferase activity // inferred from electronic annotation	6629 // lipid metabolism // inferred from electronic annotation /// 6631 // fatty acid metabolism // inferred from electronic annotation	16021 // integral to membrane // inferred from electronic annotation	---
2866	144065_at	-0.65023	1.45183	-13.7323	7.86138e-15	3.85098e-13	23.651	FBgn0025469	CG8717	slv	saliva	35773	5515 // protein binding // inferred from physical interaction	---	16020 // membrane // inferred from electronic annotation	IPR004316 // MtN3 and saliva related transmembrane protein // 3.1E-36 /// IPR004316 // MtN3 and saliva related transmembrane protein // 2.3E-38
116	141315_at	-1.53304	4.29463	-13.5788	1.06536e-14	5.12908e-13	23.343	FBgn0040732	CG16926	CG16926	CG16926	50205	5515 // protein binding // inferred from physical interaction	---	---	---
8369	149568_at	-0.854957	2.53435	-13.5668	1.09107e-14	5.23488e-13	23.3189	FBgn0037714	CG9396	CG9396	CG9396	41156	---	---	---	IPR005336 // Protein of unknown function UPF0041 // 5.7E-44
11886	153085_at	-0.603563	1.37567	-13.5505	1.12726e-14	5.39005e-13	23.2858	FBgn0014019	CG5279	Rh5	Rhodopsin 5	34615	8020 // G-protein coupled photoreceptor activity // inferred from genetic interaction /// 8020 // G-protein coupled photoreceptor activity // inferred from sequence or structural similarity /// 8020 // G-protein coupled photoreceptor activity // non-traceable author statement /// 1584 // rhodopsin-like receptor activity // inferred from electronic annotation /// 4871 // signal transducer activity…	7186 // G-protein coupled receptor protein signaling pathway // inferred from sequence or structural similarity /// 7600 // sensory perception // inferred from electronic annotation /// 7601 // visual perception // inferred from electronic annotation /// 7602 // phototransduction // inferred from genetic interaction /// 7602 // phototransduction // inferred from sequence or structural similarity …	16021 // integral to membrane // inferred from sequence or structural similarity /// 16021 // integral to membrane // non-traceable author statement /// 16028 // rhabdomere // inferred from direct assay /// 16020 // membrane // inferred from electronic annotation /// 16021 // integral to membrane // inferred from electronic annotation /// 16021 // integral to membrane // inferred from sequence si…	IPR000276 // Rhodopsin-like GPCR superfamily // 1.6E-50
10627	151826_at	-1.10261	3.79652	-13.5315	1.17074e-14	5.57894e-13	23.2474	FBgn0037913	CG6783	CG6783	CG6783	3772232	5215 // transporter activity // inferred from electronic annotation /// 5504 // fatty acid binding // inferred from sequence or structural similarity /// 5488 // binding // inferred from electronic annotation /// 8289 // lipid binding // inferred from electronic annotation /// 5504 // fatty acid binding // inferred from sequence similarity	6810 // transport // inferred from electronic annotation	5743 // mitochondrial inner membrane // inferred from electronic annotation /// 16020 // membrane // inferred from electronic annotation /// 16021 // integral to membrane // inferred from electronic annotation	IPR000566 // Lipocalin-related protein and Bos/Can/Equ allergen // 1.6E-36
2405	143604_r_at	-1.82531	2.1609	-13.5115	1.2183e-14	5.78591e-13	23.2071	FBgn0050025 /// FBgn0050031 /// FBgn0010359 /// FBgn0010358	CG30028 /// CG30031 /// CG30025 /// CG12351	CG30025 /// CG30031 /// Try	CG30025 /// CG30031 /// Trypsin /// Trypsin	246398 /// 246404 /// 36221 /// 48343	4252 // serine-type endopeptidase activity // non-traceable author statement /// 4263 // chymotrypsin activity // inferred from electronic annotation /// 4295 // trypsin activity // inferred from electronic annotation /// 4295 // trypsin activity // non-traceable author statement /// 4295 // trypsin activity // inferred from sequence or structural similarity /// 19899 // enzyme binding // inferre…	6508 // proteolysis // inferred from electronic annotation /// 6508 // proteolysis // non-traceable author statement /// 6508 // proteolysis // inferred from sequence or structural similarity /// 30422 // RNA interference, production of siRNA // inferred from mutant phenotype /// 30423 // RNA interference, targeting of mRNA for destruction // inferred from mutant phenotype /// 35196 // miRNA-medi…	5576 // extracellular region // non-traceable author statement /// 5576 // extracellular region // inferred from sequence or structural similarity /// 5576 // extracellular region // inferred from sequence similarity	IPR001254 // Peptidase S1, chymotrypsin // 1.7E-85
7638	148837_at	-0.759208	1.00961	-13.5032	1.23852e-14	5.86204e-13	23.1904	FBgn0036551	CG17029	CG17029	CG17029	39740	8934 // inositol-1(or 4)-monophosphatase activity // inferred from sequence or structural similarity /// 8934 // inositol-1(or 4)-monophosphatase activity // non-traceable author statement /// 4437 // inositol or phosphatidylinositol phosphatase activity // inferred from electronic annotation /// 8934 // inositol-1(or 4)-monophosphatase activity // inferred from sequence similarity	6644 // phospholipid metabolism // inferred from electronic annotation /// 7242 // intracellular signaling cascade // inferred from electronic annotation /// 16311 // dephosphorylation // non-traceable author statement	---	IPR000760 // Inositol monophosphatase // 7.1E-104
3366	144565_at	-0.948212	2.32275	-13.4449	1.39179e-14	6.5214e-13	23.0721	FBgn0029828	CG6067	CG6067	CG6067	31529	4295 // trypsin activity // inferred from electronic annotation /// 4252 // serine-type endopeptidase activity // inferred from electronic annotation /// 8233 // peptidase activity // inferred from electronic annotation /// 16787 // hydrolase activity // inferred from electronic annotation	6508 // proteolysis // inferred from electronic annotation	---	---
3653	144852_at	-0.693426	1.37783	-13.4161	1.47457e-14	6.86337e-13	23.0136	FBgn0030271	CG15202	CG15202	CG15202	32052	---	---	---	---
11738	152937_at	-1.10331	1.73523	-13.3923	1.54653e-14	7.17447e-13	22.9653	FBgn0031693	CG14032	Cyp4ac1	Cyp4ac1	33754	4497 // monooxygenase activity // inferred from electronic annotation /// 16491 // oxidoreductase activity // inferred from electronic annotation /// 5506 // iron ion binding // inferred from electronic annotation /// 20037 // heme binding // inferred from electronic annotation /// 46872 // metal ion binding // inferred from electronic annotation	6118 // electron transport // inferred from electronic annotation /// 42445 // hormone metabolism // non-traceable author statement /// 46701 // insecticide catabolism // non-traceable author statement	5792 // microsome // non-traceable author statement /// 16020 // membrane // non-traceable author statement /// 5783 // endoplasmic reticulum // inferred from electronic annotation /// 5792 // microsome // inferred from electronic annotation /// 16020 // membrane // inferred from electronic annotation	IPR001128 // Cytochrome P450 // 3.9E-109
10683	151882_at	-0.906067	1.99333	-13.3849	1.56972e-14	7.258e-13	22.9502	FBgn0033093	CG3270	CG3270	CG3270	35575	16491 // oxidoreductase activity // inferred from electronic annotation	6118 // electron transport // inferred from electronic annotation /// 8152 // metabolism // inferred from electronic annotation	---	---
13638	154837_at	-0.500383	1.27617	-13.3621	1.64344e-14	7.57388e-13	22.9037	FBgn0034275	CG5002	CG5002	CG5002	37025	5215 // transporter activity // non-traceable author statement /// 15381 // high affinity sulfate permease activity // inferred from sequence or structural similarity /// 5515 // protein binding // inferred from physical interaction /// 5215 // transporter activity // inferred from electronic annotation /// 15381 // high affinity sulfate permease activity // inferred from sequence similarity	6790 // sulfur metabolism // inferred from electronic annotation /// 6820 // anion transport // inferred from electronic annotation /// 6858 // extracellular transport // inferred from electronic annotation /// 6810 // transport // inferred from electronic annotation	16020 // membrane // inferred from electronic annotation /// 16021 // integral to membrane // inferred from electronic annotation	IPR001902 // Sulphate transporter // 2.4E-65
11813	153012_at	-0.897052	0.89917	-13.3105	1.82363e-14	8.32217e-13	22.7982	FBgn0032286	CG7300	CG7300	CG7300	34472	---	---	---	---
6223	147422_at	-1.08265	1.2176	-13.3074	1.83478e-14	8.34588e-13	22.7921	FBgn0034318	CG14500	CG14500	CG14500	37087	5529 // sugar binding // inferred from electronic annotation	---	---	IPR001304 // C-type lectin // 6.0E-7
11394	152593_at	-1.0576	2.30536	-13.2995	1.86427e-14	8.45255e-13	22.7759	FBgn0038938	CG7084	CG7084	CG7084	42606	8513 // organic cation porter activity // inferred from sequence or structural similarity /// 15144 // carbohydrate transporter activity // inferred from electronic annotation /// 8513 // organic cation porter activity // inferred from sequence similarity	6812 // cation transport // inferred from electronic annotation /// 6858 // extracellular transport // inferred from electronic annotation	---	IPR005828 // General substrate transporter // 1.5E-4
4853	146052_at	-0.867329	2.53313	-13.2769	1.95153e-14	8.81964e-13	22.7295	FBgn0032074	CG9494	Tsp29Fa	Tetraspanin 29Fa	34211	5102 // receptor binding // inferred from electronic annotation	7165 // signal transduction // inferred from electronic annotation /// 16337 // cell-cell adhesion // inferred from electronic annotation	16021 // integral to membrane // inferred from sequence or structural similarity /// 16021 // integral to membrane // inferred from electronic annotation /// 16021 // integral to membrane // inferred from sequence similarity	IPR000301 // CD9/CD37/CD63 antigen // 2.3E-52
11172	152371_at	-0.622913	2.09688	-13.2398	2.10371e-14	9.44645e-13	22.6534	FBgn0039081 /// FBgn0068135	CG4370	Irk2 /// DyakIrk2	Inwardly rectifying potassium channel 2 /// Irk2	42770	5242 // inward rectifier potassium channel activity // non-traceable author statement /// 15467 // G-protein activated inward rectifier potassium channel activity // inferred from sequence or structural similarity /// 5216 // ion channel activity // inferred from electronic annotation /// 5242 // inward rectifier potassium channel activity // inferred from electronic annotation /// 5244 // voltag…	6812 // cation transport // inferred from electronic annotation /// 6813 // potassium ion transport // inferred from electronic annotation /// 6810 // transport // inferred from electronic annotation /// 6811 // ion transport // inferred from electronic annotation	16020 // membrane // inferred from electronic annotation /// 16021 // integral to membrane // inferred from electronic annotation	IPR001838 // K+ channel, inward rectifier // 1.0E-126 /// IPR001838 // K+ channel, inward rectifier // 1.0E-126
8104	149303_at	-1.06381	2.65474	-13.2091	2.23873e-14	9.92552e-13	22.5903	FBgn0037288	CG14661	CG14661	CG14661	40611	---	---	---	IPR004272 // Odorant binding protein // 1.1E-48
4570	145769_at	-1.1145	2.12213	-13.1766	2.39128e-14	1.05352e-12	22.5235	FBgn0031617	CG15635	CG15635	CG15635	33665	3677 // DNA binding // inferred from electronic annotation /// 8170 // N-methyltransferase activity // inferred from electronic annotation	6306 // DNA methylation // inferred from electronic annotation	---	---
9453	150652_at	-1.04431	0.4225	-13.1644	2.45132e-14	1.07658e-12	22.4984	FBgn0051086	CG31086	CG31086	CG31086	43179	5515 // protein binding // inferred from physical interaction	---	---	---
6572	147771_at	-1.11322	1.58766	-13.1264	2.64848e-14	1.15954e-12	22.42	FBgn0041712	CG9889	yellow-d	yellow-d	37703	---	---	---	IPR003534 // Major royal jelly protein // 1.0E-126
10334	151533_at	-1.38669	1.47904	-13.1145	2.71327e-14	1.1842e-12	22.3955	FBgn0051148	CG31148	CG31148	CG31148	42796	4348 // glucosylceramidase activity // inferred from sequence or structural similarity /// 15926 // glucosidase activity // inferred from electronic annotation /// 16799 // hydrolase activity, hydrolyzing N-glycosyl compounds // inferred from electronic annotation /// 4348 // glucosylceramidase activity // inferred from electronic annotation /// 4348 // glucosylceramidase activity // inferred fro…	6629 // lipid metabolism // inferred from electronic annotation /// 6665 // sphingolipid metabolism // inferred from electronic annotation /// 7040 // lysosome organization and biogenesis // inferred from electronic annotation	5764 // lysosome // inferred from electronic annotation	IPR001139 // Glycoside hydrolase, family 30 // 2.3 /// IPR001139 // Glycoside hydrolase, family 30 // 9.2E-6 /// IPR001139 // Glycoside hydrolase, family 30 // 8.7E-70
13144	154343_at	-0.773532	2.45465	-13.084	2.88727e-14	1.25623e-12	22.3324	FBgn0030594	CG9509	CG9509	CG9509	32420	8812 // choline dehydrogenase activity // inferred from sequence or structural similarity /// 50660 // FAD binding // inferred from electronic annotation /// 16491 // oxidoreductase activity // inferred from electronic annotation /// 16614 // oxidoreductase activity, acting on CH-OH group of donors // inferred from electronic annotation /// 8812 // choline dehydrogenase activity // inferred from …	6118 // electron transport // inferred from electronic annotation /// 7498 // mesoderm development // inferred from expression pattern	---	IPR000172 // Glucose-methanol-choline oxidoreductase // 2.5E-86 /// IPR007867 // GMC oxidoreductase // 2.5E-35
10759	151958_at	-0.662485	2.22715	-13.0768	2.93012e-14	1.27093e-12	22.3175	FBgn0028988	CG9456	Spn1	Serine protease inhibitor 1	49808	4867 // serine-type endopeptidase inhibitor activity // inferred from sequence or structural similarity /// 4867 // serine-type endopeptidase inhibitor activity // non-traceable author statement /// 5515 // protein binding // inferred from physical interaction /// 4867 // serine-type endopeptidase inhibitor activity // inferred from electronic annotation /// 4867 // serine-type endopeptidase inhi…	6508 // proteolysis // inferred from electronic annotation	---	IPR000215 // Serpin // 3.0E-112
6068	147267_at	-0.547783	0.271685	-13.0602	3.03171e-14	1.3084e-12	22.283	FBgn0034052	CG8299	CG8299	CG8299	36751	4252 // serine-type endopeptidase activity // inferred from sequence or structural similarity /// 4263 // chymotrypsin activity // inferred from electronic annotation /// 4295 // trypsin activity // non-traceable author statement /// 4252 // serine-type endopeptidase activity // inferred from sequence similarity	6508 // proteolysis // non-traceable author statement	---	IPR001254 // Peptidase S1, chymotrypsin // 1.2E-73
6235	147434_at	-1.01015	0.67949	-13.0596	3.0352e-14	1.3084e-12	22.2818	FBgn0063499	CG17522	GstE10	Glutathione S transferase E10	37105	4364 // glutathione transferase activity // inferred from sequence or structural similarity /// 5515 // protein binding // inferred from physical interaction /// 16740 // transferase activity // inferred from electronic annotation /// 4364 // glutathione transferase activity // inferred from sequence similarity	6952 // defense response // inferred from electronic annotation /// 9636 // response to toxin // inferred from electronic annotation	---	IPR004046 // Glutathione S-transferase, C-terminal // 1.1E-10 /// IPR004045 // Glutathione S-transferase, N-terminal // 6.6E-17
12224	153423_at	-1.04217	3.59991	-13.0457	3.12237e-14	1.33367e-12	22.2531	FBgn0011280	CG1668	Pbprp2	Pheromone-binding protein-related protein 2	33040	5550 // pheromone binding // inferred from sequence or structural similarity /// 5550 // pheromone binding // non-traceable author statement /// 8145 // phenylalkylamine binding // non-traceable author statement /// 5549 // odorant binding // inferred from electronic annotation /// 5550 // pheromone binding // inferred from sequence similarity	6810 // transport // inferred from electronic annotation	5576 // extracellular region // non-traceable author statement	IPR006170 // Pheromone/general odorant binding protein, PBP/GOBP // 1.6E-28
11346	152545_at	-0.644513	3.46034	-12.9824	3.55521e-14	1.50935e-12	22.1215	FBgn0033663	CG8983	ERp60	ERp60	36270	3756 // protein disulfide isomerase activity // inferred from electronic annotation /// 3756 // protein disulfide isomerase activity // inferred from sequence or structural similarity /// 5515 // protein binding // inferred from physical interaction /// 16853 // isomerase activity // inferred from electronic annotation /// 3756 // protein disulfide isomerase activity // inferred from sequence sim…	6118 // electron transport // inferred from electronic annotation /// 6457 // protein folding // inferred from sequence or structural similarity /// 6464 // protein modification // inferred from electronic annotation /// 6457 // protein folding // inferred from sequence similarity	5783 // endoplasmic reticulum // inferred from electronic annotation	IPR006662 // Thioredoxin type domain // 1.3E-44 /// IPR006662 // Thioredoxin type domain // 7.8E-43 /// IPR006662 // Thioredoxin type domain // 1.3E-44
6208	147407_at	-1.14967	1.15405	-12.9525	3.78014e-14	1.59999e-12	22.0593	FBgn0034292	CG5767	CG5767	CG5767	37055	---	---	---	IPR007931 // Protein of unknown function DUF725 // 2.1E-74
9225	150424_at	-1.26459	1.89542	-12.9301	3.9586e-14	1.66546e-12	22.0125	FBgn0039052	CG6733	CG6733	CG6733	42731	4046 // aminoacylase activity // non-traceable author statement /// 8237 // metallopeptidase activity // inferred from electronic annotation /// 5515 // protein binding // inferred from physical interaction /// 4046 // aminoacylase activity // inferred from electronic annotation /// 16787 // hydrolase activity // inferred from electronic annotation /// 46983 // protein dimerization activity // in…	6508 // proteolysis // inferred from electronic annotation /// 6520 // amino acid metabolism // inferred from electronic annotation	5737 // cytoplasm // inferred from electronic annotation	IPR002933 // Peptidase M20 // 4.0E-97
10296	151495_at	-1.14755	3.41237	-12.8524	4.64741e-14	1.94359e-12	21.8498	FBgn0028491	CG2930	CG2930	CG2930	31341	5427 // proton-dependent oligopeptide transporter activity // inferred from sequence or structural similarity /// 5215 // transporter activity // inferred from electronic annotation /// 5427 // proton-dependent oligopeptide transporter activity // inferred from sequence similarity	6810 // transport // inferred from electronic annotation /// 6857 // oligopeptide transport // inferred from electronic annotation	16020 // membrane // inferred from electronic annotation	IPR000109 // TGF-beta receptor, type I/II extracellular region // 9.7E-102 /// IPR000109 // TGF-beta receptor, type I/II extracellular region // 1.2E-7
13347	154546_at	-0.677264	2.03382	-12.8525	4.6458e-14	1.94359e-12	21.8502	FBgn0037807	CG6293	CG6293	CG6293	41259	8520 // L-ascorbate:sodium symporter activity // inferred from sequence or structural similarity /// 5515 // protein binding // inferred from physical interaction /// 5215 // transporter activity // inferred from electronic annotation /// 8520 // L-ascorbate:sodium symporter activity // inferred from sequence similarity	6139 // nucleobase, nucleoside, nucleotide and nucleic acid metabolism // inferred from electronic annotation /// 15931 // nucleobase, nucleoside, nucleotide and nucleic acid transport // inferred from electronic annotation /// 6810 // transport // inferred from electronic annotation	16020 // membrane // inferred from electronic annotation	IPR006043 // Xanthine/uracil/vitamin C permease family // 1.6E-87
11202	152401_at	-0.69493	2.49371	-12.8358	4.80923e-14	2.00528e-12	21.8151	FBgn0032015	CG7830	CG7830	CG7830	34137	16740 // transferase activity // inferred from electronic annotation /// 16757 // transferase activity, transferring glycosyl groups // inferred from electronic annotation	6118 // electron transport // inferred from electronic annotation /// 6464 // protein modification // inferred from electronic annotation /// 19538 // protein metabolism // inferred from electronic annotation	---	IPR006844 // OST3/OST6 // 1.0E-126
2949	144148_at	-1.00166	1.3312	-12.8166	5.00413e-14	2.08035e-12	21.7748	FBgn0026565	CG1315	CG1315	CG1315	40812	4055 // argininosuccinate synthase activity // inferred from sequence or structural similarity /// 4055 // argininosuccinate synthase activity // non-traceable author statement /// 5524 // ATP binding // inferred from electronic annotation /// 4055 // argininosuccinate synthase activity // inferred from sequence similarity	50 // urea cycle // non-traceable author statement /// 53 // argininosuccinate metabolism // inferred from sequence or structural similarity /// 6526 // arginine biosynthesis // non-traceable author statement /// 53 // argininosuccinate metabolism // inferred from sequence similarity	---	IPR001518 // Argininosuccinate synthase // 1.0E-126
7060	148259_at	-0.965616	2.51649	-12.7963	5.21926e-14	2.15698e-12	21.7322	FBgn0035673	CG6602	CG6602	CG6602	38691	---	---	---	---
195	141394_at	-0.684775	1.93436	-12.7935	5.24979e-14	2.16322e-12	21.7262	FBgn0035656	CG10479	CG10479	CG10479	38674	---	7242 // intracellular signaling cascade // inferred from electronic annotation	---	IPR000980 // SH2 motif // 6.2E-11
7054	148253_at	-1.81205	4.64296	-12.7871	5.32023e-14	2.18582e-12	21.7127	FBgn0035664	CG6467	Jon65Aiv	Jonah 65Aiv	38682	4252 // serine-type endopeptidase activity // inferred from sequence or structural similarity /// 4263 // chymotrypsin activity // non-traceable author statement /// 4295 // trypsin activity // inferred from electronic annotation /// 5515 // protein binding // inferred from physical interaction /// 4252 // serine-type endopeptidase activity // inferred from electronic annotation /// 8233 // pepti…	6508 // proteolysis // non-traceable author statement /// 6508 // proteolysis // inferred from electronic annotation	---	IPR001254 // Peptidase S1, chymotrypsin // 6.5E-70
3321	144520_at	-1.19522	1.68822	-12.7539	5.70007e-14	2.32822e-12	21.6428	FBgn0029765	CG16756	CG16756	CG16756	31460	3796 // lysozyme activity // non-traceable author statement	6960 // antimicrobial humoral response (sensu Protostomia) // non-traceable author statement	5576 // extracellular region // inferred from electronic annotation	IPR001916 // Glycoside hydrolase, family 22 // 4.0E-37
10350	151549_i_at	-1.25114	1.81934	-12.7412	5.85154e-14	2.38314e-12	21.6162	FBgn0051017	CG31017	PH4NE3	prolyl-4-hydroxylase-alpha NE3	326114	4656 // procollagen-proline 4-dioxygenase activity // inferred from sequence or structural similarity /// 16706 // oxidoreductase activity, acting on paired donors, with incorporation or reduction of molecular oxygen, 2-oxoglutarate as one donor, and incorporation of one atom each of oxygen into both donors // inferred from electronic annotation /// 4656 // procollagen-proline 4-dioxygenase activ…	6464 // protein modification // inferred from electronic annotation /// 19538 // protein metabolism // inferred from electronic annotation	16222 // procollagen-proline, 2-oxoglutarate-4-dioxygenase complex // Unknown /// 16222 // procollagen-proline, 2-oxoglutarate-4-dioxygenase complex // inferred from curator	IPR005123 // 2OG-Fe(II) oxygenase superfamily // 1.7E-7
4617	145816_at	-1.00453	1.39158	-12.7254	6.04792e-14	2.45598e-12	21.5827	FBgn0031694	CG17970	Cyp4ac2	Cyp4ac2	33755	4497 // monooxygenase activity // inferred from electronic annotation /// 16491 // oxidoreductase activity // inferred from electronic annotation /// 5506 // iron ion binding // inferred from electronic annotation /// 20037 // heme binding // inferred from electronic annotation /// 46872 // metal ion binding // inferred from electronic annotation	6118 // electron transport // inferred from electronic annotation /// 8202 // steroid metabolism // inferred from electronic annotation /// 42445 // hormone metabolism // non-traceable author statement /// 46701 // insecticide catabolism // non-traceable author statement	5792 // microsome // non-traceable author statement /// 16020 // membrane // non-traceable author statement	IPR001128 // Cytochrome P450 // 2.1E-78
8106	149305_at	-0.512335	2.58423	-12.7111	6.23057e-14	2.52284e-12	21.5526	FBgn0037290	CG1124	CG1124	CG1124	40613	5515 // protein binding // inferred from physical interaction	---	---	IPR004272 // Odorant binding protein // 4.5E-48
2625	143824_at	-0.970481	2.1661	-12.7078	6.2732e-14	2.53278e-12	21.5456	FBgn0015583	CG17797	Acp29AB	Accessory gland-specific peptide 29AB	34162	5179 // hormone activity // non-traceable author statement /// 5529 // sugar binding // inferred from sequence or structural similarity /// 5534 // galactose binding // inferred from sequence or structural similarity /// 5515 // protein binding // inferred from physical interaction /// 5529 // sugar binding // inferred from electronic annotation /// 5529 // sugar binding // inferred from sequence…	7283 // spermatogenesis // inferred from electronic annotation /// 7321 // sperm displacement // non-traceable author statement /// 7582 // physiological process // non-traceable author statement /// 45297 // post-mating behavior // non-traceable author statement /// 46692 // sperm competition // traceable author statement /// 7610 // behavior // inferred from electronic annotation	5576 // extracellular region // non-traceable author statement	IPR001304 // C-type lectin // 1.8E-9
10665	151864_at	-0.660594	2.44684	-12.6898	6.51282e-14	2.62197e-12	21.5076	FBgn0041150	CG12787	hoe1	hoepel1	249663	5215 // transporter activity // inferred from sequence or structural similarity /// 5302 // L-tyrosine transporter activity // non-traceable author statement /// 8324 // cation transporter activity // inferred from electronic annotation /// 15105 // arsenite transporter activity // inferred from electronic annotation /// 15137 // citrate transporter activity // inferred from electronic annotation…	6810 // transport // inferred from sequence or structural similarity /// 6812 // cation transport // inferred from electronic annotation /// 6820 // anion transport // inferred from electronic annotation /// 15746 // citrate transport // inferred from electronic annotation /// 6810 // transport // inferred from sequence similarity	16020 // membrane // non-traceable author statement /// 16021 // integral to membrane // inferred from electronic annotation	---
13127	154326_at	-0.605289	2.64958	-12.682	6.62055e-14	2.6577e-12	21.491	FBgn0027070	CG17322	CG17322	CG17322	35139	3851 // 2-hydroxyacylsphingosine 1-beta-galactosyltransferase activity // inferred from sequence or structural similarity /// 16740 // transferase activity // inferred from electronic annotation /// 16757 // transferase activity, transferring glycosyl groups // inferred from electronic annotation /// 16758 // transferase activity, transferring hexosyl groups // inferred from electronic annotation…	5976 // polysaccharide metabolism // inferred from electronic annotation /// 6952 // defense response // inferred from electronic annotation /// 8202 // steroid metabolism // inferred from electronic annotation /// 9636 // response to toxin // inferred from electronic annotation /// 8152 // metabolism // inferred from electronic annotation	---	IPR002213 // UDP-glucoronosyl/UDP-glucosyl transferase // 2.4E-40
5188	146387_at	-0.639622	1.38575	-12.6636	6.87981e-14	2.75389e-12	21.452	FBgn0032615	CG6012	CG6012	CG6012	35022	16616 // oxidoreductase activity, acting on the CH-OH group of donors, NAD or NADP as acceptor // inferred from sequence or structural similarity /// 16616 // oxidoreductase activity, acting on the CH-OH group of donors, NAD or NADP as acceptor // inferred from sequence similarity	8202 // steroid metabolism // inferred from electronic annotation	---	IPR002198 // Short-chain dehydrogenase/reductase SDR // 2.0E-39
161	141360_at	-0.852243	1.07294	-12.6482	7.10384e-14	2.83547e-12	21.4195	FBgn0036659	CG9701	CG9701	CG9701	39872	15926 // glucosidase activity // inferred from electronic annotation /// 16787 // hydrolase activity // inferred from electronic annotation /// 16799 // hydrolase activity, hydrolyzing N-glycosyl compounds // inferred from electronic annotation /// 4553 // hydrolase activity, hydrolyzing O-glycosyl compounds // inferred from electronic annotation	5975 // carbohydrate metabolism // inferred from electronic annotation	---	IPR001360 // Glycoside hydrolase, family 1 // 1.0E-126
5945	147144_at	-1.13685	1.43125	-12.6202	7.53197e-14	2.99781e-12	21.3602	FBgn0033826	CG4734	CG4734	CG4734	36477	---	---	---	---
8108	149307_at	-0.532937	1.96166	-12.6114	7.67268e-14	3.04516e-12	21.3414	FBgn0037292	CG2022	CG2022	CG2022	40615	5057 // receptor signaling protein activity // inferred from electronic annotation	---	5778 // peroxisomal membrane // inferred from sequence or structural similarity /// 16021 // integral to membrane // inferred from electronic annotation /// 5778 // peroxisomal membrane // inferred from sequence similarity	IPR007248 // Mpv17/PMP22 // 5.4E-46
13773	154972_at	-0.635362	0.97847	-12.6012	7.83832e-14	3.10212e-12	21.3198	FBgn0037664	CG8420	CG8420	CG8420	41097	---	---	---	---
11618	152817_at	-1.54695	3.8207	-12.5537	8.65934e-14	3.40779e-12	21.2187	FBgn0033446	CG1648	CG1648	CG1648	36009	5515 // protein binding // inferred from physical interaction	---	---	---
6849	148048_at	-1.42128	0.413383	-12.4993	9.71041e-14	3.81073e-12	21.1026	FBgn0035343	CG16762	CG16762	CG16762	38310	---	---	---	IPR007931 // Protein of unknown function DUF725 // 1.8E-77
2458	143657_at	-0.769118	3.2107	-12.484	1.00288e-13	3.92467e-12	21.0698	FBgn0011336	CG7748	OstStt3	Oligosaccharyl transferase 3	43005	4576 // oligosaccharyl transferase activity // inferred from sequence or structural similarity /// 4576 // oligosaccharyl transferase activity // inferred from electronic annotation /// 4576 // oligosaccharyl transferase activity // inferred from sequence similarity	6486 // protein amino acid glycosylation // inferred from electronic annotation	8250 // oligosaccharyl transferase complex // inferred from sequence or structural similarity /// 16020 // membrane // inferred from electronic annotation /// 8250 // oligosaccharyl transferase complex // inferred from sequence similarity	IPR003674 // Oligosaccharyl transferase, STT3 subunit // 1.0E-126
8591	149790_at	-0.828853	1.46591	-12.4536	1.0693e-13	4.17294e-12	21.0048	FBgn0038069	CG11608	CG11608	CG11608	41556	4806 // triacylglycerol lipase activity // inferred from sequence or structural similarity /// 4806 // triacylglycerol lipase activity // inferred from sequence similarity	6629 // lipid metabolism // inferred from electronic annotation	---	IPR006693 // Ab-hydrolase associated lipase region // 1.9E-15
1520	142719_at	-0.967968	1.29775	-12.4518	1.07332e-13	4.17699e-12	21.001	FBgn0036186	CG6071	CG6071	CG6071	39308	4179 // membrane alanyl aminopeptidase activity // inferred from sequence or structural similarity /// 4179 // membrane alanyl aminopeptidase activity // inferred from electronic annotation /// 4179 // membrane alanyl aminopeptidase activity // inferred from sequence similarity	6508 // proteolysis // inferred from electronic annotation	---	IPR001930 // Peptidase M1, membrane alanine aminopeptidase // 1.1E-30
13135	154334_at	-0.722811	2.91947	-12.4433	1.09289e-13	4.24139e-12	20.9827	FBgn0035404	CG12079	CG12079	CG12079	38378	3954 // NADH dehydrogenase activity // inferred from sequence or structural similarity /// 8137 // NADH dehydrogenase (ubiquinone) activity // inferred from sequence or structural similarity /// 5515 // protein binding // inferred from physical interaction /// 8137 // NADH dehydrogenase (ubiquinone) activity // inferred from electronic annotation /// 16491 // oxidoreductase activity // inferred f…	6120 // mitochondrial electron transport, NADH to ubiquinone // inferred from sequence or structural similarity /// 6118 // electron transport // inferred from electronic annotation /// 6120 // mitochondrial electron transport, NADH to ubiquinone // inferred from electronic annotation /// 6120 // mitochondrial electron transport, NADH to ubiquinone // inferred from sequence similarity	5747 // respiratory chain complex I (sensu Eukaryota) // inferred from sequence or structural similarity /// 5747 // respiratory chain complex I (sensu Eukaryota) // inferred from sequence similarity	IPR001268 // NADH dehydrogenase (ubiquinone), 30 kDa subunit // 8.5E-46
220	141419_at	-0.920233	1.13862	-12.4162	1.15728e-13	4.45424e-12	20.9246	FBgn0038845	CG10827	CG10827	CG10827	42482	4035 // alkaline phosphatase activity // inferred from sequence or structural similarity /// 19204 // nucleotide phosphatase activity // inferred from electronic annotation /// 287 // magnesium ion binding // inferred from electronic annotation /// 8270 // zinc ion binding // inferred from electronic annotation /// 16787 // hydrolase activity // inferred from electronic annotation /// 4035 // alk…	1501 // skeletal development // inferred from electronic annotation /// 7498 // mesoderm development // inferred from electronic annotation /// 8152 // metabolism // inferred from electronic annotation	---	IPR001952 // Alkaline phosphatase // 2.2E-93
4766	145965_at	-0.766234	1.6561	-12.3733	1.26738e-13	4.86467e-12	20.8324	FBgn0083141	CG6717	Spn7	Serine protease inhibitor 7	---	4867 // serine-type endopeptidase inhibitor activity // inferred from electronic annotation	---	---	IPR000215 // Serpin // 3.5E-85 /// IPR000215 // Serpin // 8.2E-84
4770	145969_at	-0.698604	1.05386	-12.3492	1.33401e-13	5.0925e-12	20.7805	FBgn0031930	CG7025	CG7025	CG7025	34042	4181 // metallocarboxypeptidase activity // inferred from sequence or structural similarity /// 4182 // carboxypeptidase A activity // inferred from electronic annotation /// 4181 // metallocarboxypeptidase activity // inferred from sequence similarity	6508 // proteolysis // inferred from electronic annotation	---	IPR000834 // Peptidase M14, carboxypeptidase A // 5.5E-69
3652	144851_at	-1.07016	1.35975	-12.3477	1.33809e-13	5.09421e-12	20.7774	FBgn0030270	CG15199	CG15199	CG15199	32051	---	---	---	---
9513	150712_at	-0.860573	1.40243	-12.3214	1.41518e-13	5.37308e-12	20.7205	FBgn0039486	CG6074	CG6074	CG6074	43264	4089 // carbonate dehydratase activity // inferred from sequence or structural similarity /// 8270 // zinc ion binding // inferred from electronic annotation /// 4089 // carbonate dehydratase activity // inferred from electronic annotation /// 4089 // carbonate dehydratase activity // inferred from sequence similarity	6730 // one-carbon compound metabolism // inferred from electronic annotation	---	IPR001148 // Carbonic anhydrase, eukaryotic // 3.8E-49 /// IPR001148 // Carbonic anhydrase, eukaryotic // 1.3E-49
13063	154262_at	-0.858224	2.76583	-12.2541	1.63333e-13	6.13482e-12	20.5751	FBgn0004507	CG7254	GlyP	Glycogen phosphorylase	33386	4645 // phosphorylase activity // inferred from direct assay /// 8184 // glycogen phosphorylase activity // inferred from mutant phenotype /// 8184 // glycogen phosphorylase activity // inferred from sequence or structural similarity /// 8184 // glycogen phosphorylase activity // non-traceable author statement /// 4645 // phosphorylase activity // inferred from electronic annotation /// 16740 // …	5975 // carbohydrate metabolism // non-traceable author statement /// 5977 // glycogen metabolism // inferred from electronic annotation /// 5977 // glycogen metabolism // inferred from mutant phenotype /// 5975 // carbohydrate metabolism // inferred from electronic annotation	---	IPR000811 // Glycosyl transferase, family 35 // 1.0E-126
9093	150292_at	-0.630554	1.48322	-12.1991	1.83742e-13	6.88295e-12	20.4557	FBgn0038849	CG7079	CG7079	CG7079	42488	---	---	---	IPR004272 // Odorant binding protein // 6.3E-53
11415	152614_at	-0.955316	2.7979	-12.1969	1.84601e-13	6.89669e-12	20.451	FBgn0031702	CG14021	CG14021	CG14021	33765	---	---	---	---
12271	153470_at	-0.697985	1.66954	-12.1304	2.129e-13	7.91175e-12	20.3063	FBgn0034436	CG11961	CG11961	CG11961	37221	8233 // peptidase activity // inferred from electronic annotation	6508 // proteolysis // inferred from electronic annotation	---	IPR007484 // Peptidase M28 // 2.9E-12 /// IPR007484 // Peptidase M28 // 2.9E-12
1517	142716_at	-0.805997	1.81993	-12.1016	2.26524e-13	8.3516e-12	20.2434	FBgn0033101	CG9436	CG9436	CG9436	35586	4032 // aldehyde reductase activity // inferred from sequence or structural similarity /// 16491 // oxidoreductase activity // inferred from electronic annotation /// 4032 // aldehyde reductase activity // inferred from sequence similarity	---	---	IPR001395 // Aldo/keto reductase // 1.6E-116
5518	146717_at	-0.811529	1.21994	-12.1025	2.26102e-13	8.3516e-12	20.2453	FBgn0033138	CG12832	Tsp42Eq	Tetraspanin 42Eq	35628	---	---	16021 // integral to membrane // inferred from sequence or structural similarity /// 16021 // integral to membrane // inferred from electronic annotation /// 16021 // integral to membrane // inferred from sequence similarity	IPR000301 // CD9/CD37/CD63 antigen // 1.1E-18
7280	148479_at	-1.30956	0.527605	-12.0678	2.43617e-13	8.93475e-12	20.1696	FBgn0036023	CG18179	CG18179	CG18179	39124	4263 // chymotrypsin activity // non-traceable author statement /// 4295 // trypsin activity // inferred from electronic annotation /// 4252 // serine-type endopeptidase activity // inferred from electronic annotation /// 8233 // peptidase activity // inferred from electronic annotation /// 16787 // hydrolase activity // inferred from electronic annotation	6508 // proteolysis // non-traceable author statement /// 6508 // proteolysis // inferred from electronic annotation	---	IPR001254 // Peptidase S1, chymotrypsin // 2.2E-47
1752	142951_at	-1.92241	2.99316	-12.0131	2.74201e-13	1.00302e-11	20.0496	FBgn0028534	CG7916	CG7916	CG7916	34800	5515 // protein binding // inferred from physical interaction	---	---	---
11557	152756_at	-1.61259	4.08556	-11.9852	2.91244e-13	1.05983e-11	19.9884	FBgn0000120 /// FBgn0068531	CG5711	Arr1 /// DyakArr1	Arrestin 1 /// Arr1	35078	16030 // metarhodopsin binding // inferred from sequence or structural similarity /// 16030 // metarhodopsin binding // traceable author statement /// 5515 // protein binding // inferred from physical interaction /// 16030 // metarhodopsin binding // inferred from sequence similarity	6886 // intracellular protein transport // inferred from electronic annotation /// 6897 // endocytosis // inferred from electronic annotation /// 7186 // G-protein coupled receptor protein signaling pathway // inferred from electronic annotation /// 7602 // phototransduction // non-traceable author statement /// 16059 // deactivation of rhodopsin mediated signaling // inferred from genetic intera…	5624 // membrane fraction // inferred from direct assay /// 16028 // rhabdomere // inferred from direct assay	IPR000698 // Arrestin // 9.1E-60 /// IPR000698 // Arrestin // 6.7E-31
3513	144712_at	-0.887241	1.4652	-11.9494	3.1475e-13	1.13944e-11	19.9097	FBgn0041629	CG1787	Hexo2	Hexosaminidase 2	31808	4563 // beta-N-acetylhexosaminidase activity // inferred from sequence or structural similarity /// 16799 // hydrolase activity, hydrolyzing N-glycosyl compounds // inferred from electronic annotation /// 4563 // beta-N-acetylhexosaminidase activity // inferred from electronic annotation /// 4563 // beta-N-acetylhexosaminidase activity // inferred from sequence similarity	5976 // polysaccharide metabolism // inferred from electronic annotation /// 5975 // carbohydrate metabolism // inferred from electronic annotation	---	IPR001540 // Glycoside hydrolase, family 20 // 1.4E-95 /// IPR001540 // Glycoside hydrolase, family 20 // 1.7E-10
12746	153945_at	-0.761244	2.82361	-11.9502	3.142e-13	1.13944e-11	19.9115	FBgn0035252	CG7970	CG7970	CG7970	38205	5515 // protein binding // inferred from physical interaction	---	5778 // peroxisomal membrane // inferred from sequence or structural similarity /// 5829 // cytosol // inferred from direct assay /// 16021 // integral to membrane // inferred from electronic annotation /// 5778 // peroxisomal membrane // inferred from sequence similarity	---
1111	142310_at	-0.767528	3.11928	-11.9478	3.15884e-13	1.1406e-11	19.9061	FBgn0015575	CG1112	Est7	Esterase-7	40901	4091 // carboxylesterase activity // inferred from sequence or structural similarity /// 4091 // carboxylesterase activity // non-traceable author statement /// 3824 // catalytic activity // inferred from electronic annotation /// 4759 // serine esterase activity // inferred from electronic annotation /// 4091 // carboxylesterase activity // inferred from sequence similarity	---	---	IPR002018 // Carboxylesterase, type B // 1.0E-126 /// IPR002018 // Carboxylesterase, type B // 3.5E-63 /// IPR002018 // Carboxylesterase, type B // 2.7E-45
9911	151110_at	-1.04319	2.36119	-11.9103	3.42674e-13	1.23099e-11	19.8235	FBgn0040623	CG11500	CG11500	CG11500	50096	9003 // signal peptidase activity // non-traceable author statement	6465 // signal peptide processing // non-traceable author statement	5787 // signal peptidase complex // non-traceable author statement /// 5792 // microsome // inferred from electronic annotation /// 16021 // integral to membrane // inferred from electronic annotation	IPR009542 // Microsomal signal peptidase 12 kDa subunit // 2.5E-50
4968	146167_at	-0.680802	1.42026	-11.9077	3.44617e-13	1.2348e-11	19.8177	FBgn0032266	CG18302	CG18302	CG18302	34452	16298 // lipase activity // inferred from electronic annotation /// 16787 // hydrolase activity // inferred from electronic annotation	6629 // lipid metabolism // inferred from electronic annotation	---	IPR006693 // Ab-hydrolase associated lipase region // 4.0E-22
1157	142356_at	-1.22576	5.20913	-11.8901	3.58076e-13	1.27975e-11	19.7789	FBgn0016724	CG11064	RfaBp	Retinoid- and fatty-acid binding protein	43827	5198 // structural molecule activity // inferred from sequence or structural similarity /// 5319 // lipid transporter activity // inferred from electronic annotation /// 5501 // retinoid binding // non-traceable author statement /// 5504 // fatty acid binding // non-traceable author statement /// 8017 // microtubule binding // inferred from direct assay /// 19841 // retinol binding // inferred fr…	6810 // transport // traceable author statement /// 6869 // lipid transport // inferred from electronic annotation /// 7224 // smoothened signaling pathway // inferred from mutant phenotype /// 16055 // Wnt receptor signaling pathway // inferred from mutant phenotype /// 6810 // transport // inferred from electronic annotation /// 16055 // Wnt receptor signaling pathway // inferred from electroni…	5576 // extracellular region // non-traceable author statement	IPR009454 // Protein of unknown function DUF1081 // 3.0E-55 /// IPR001846 // von Willebrand factor, type D // 2.9E-29 /// IPR001747 // Lipid transport protein, N-terminal // 7.1E-119
11767	152966_at	-0.664821	0.494339	-11.8626	3.80265e-13	1.3556e-11	19.7179	FBgn0036698	CG7724	CG7724	CG7724	39918	3854 // 3-beta-hydroxy-delta5-steroid dehydrogenase activity // inferred from electronic annotation /// 16614 // oxidoreductase activity, acting on CH-OH group of donors // inferred from sequence or structural similarity /// 5515 // protein binding // inferred from physical interaction /// 4769 // steroid delta-isomerase activity // inferred from electronic annotation /// 16614 // oxidoreductase …	6694 // steroid biosynthesis // inferred from electronic annotation /// 8203 // cholesterol metabolism // inferred from electronic annotation	---	---
1179	142378_at	-1.07315	1.03111	-11.7762	4.59291e-13	1.62903e-11	19.5263	FBgn0038652	CG7720	CG7720	CG7720	42257	8324 // cation transporter activity // inferred from electronic annotation /// 8507 // sodium:iodide symporter activity // inferred from sequence or structural similarity /// 5215 // transporter activity // inferred from electronic annotation /// 8507 // sodium:iodide symporter activity // inferred from sequence similarity	6732 // coenzyme metabolism // inferred from electronic annotation /// 6812 // cation transport // inferred from electronic annotation /// 6858 // extracellular transport // inferred from electronic annotation /// 51189 // prosthetic group metabolism // inferred from electronic annotation /// 6810 // transport // inferred from electronic annotation	16020 // membrane // inferred from electronic annotation	---
5922	147121_at	-0.740968	0.55303	-11.7214	5.18007e-13	1.82803e-11	19.4043	FBgn0050488	CG30488	CG30488	CG30488	246647	---	6952 // defense response // inferred from electronic annotation	5576 // extracellular region // inferred from sequence or structural similarity /// 5576 // extracellular region // inferred from electronic annotation /// 5576 // extracellular region // inferred from sequence similarity	IPR001283 // Allergen V5/Tpx-1 related // 8.1E-7
7601	148800_at	-0.671948	0.889123	-11.6788	5.6888e-13	2.00251e-11	19.3092	FBgn0036495	CG33259	CG33259	CG33259	2768950	---	---	---	IPR002919 // Trypsin inhibitor-like, cysteine-rich TIL region // 1.0E-17
955	142154_at	-0.740237	2.64949	-11.6769	5.71292e-13	2.00597e-11	19.3049	FBgn0014396	CG3234	tim	timeless	---	5515 // protein binding // traceable author statement	7617 // mating behavior // inferred from mutant phenotype /// 7620 // copulation // inferred from mutant phenotype /// 45187 // regulation of circadian sleep/wake cycle, sleep // inferred from mutant phenotype /// 48512 // circadian behavior // inferred from mutant phenotype /// 48511 // rhythmic process // inferred from electronic annotation /// 7622 // rhythmic behavior // traceable author stat…	5634 // nucleus // inferred from electronic annotation /// 5634 // nucleus // traceable author statement /// 5737 // cytoplasm // traceable author statement /// 5634 // nucleus // non-traceable author statement /// 5737 // cytoplasm // non-traceable author statement	IPR006906 // Timeless protein // 2.5E-123 /// IPR006906 // Timeless protein // 1.0E-126 /// IPR006906 // Timeless protein // 1.0E-126
5018	146217_at	-0.736147	1.11728	-11.666	5.85199e-13	2.04966e-11	19.2805	FBgn0040096	CG16834	lectin-33A	lectin-33A	53516	5534 // galactose binding // inferred from sequence or structural similarity /// 5529 // sugar binding // inferred from electronic annotation /// 5534 // galactose binding // inferred from sequence similarity	---	---	IPR001304 // C-type lectin // 1.0E-4
7056	148255_at	-1.47422	0.764639	-11.6607	5.92116e-13	2.06871e-11	19.2686	FBgn0035667	CG10475	Jon65Ai	Jonah 65Ai	38685	4252 // serine-type endopeptidase activity // inferred from sequence or structural similarity /// 4252 // serine-type endopeptidase activity // non-traceable author statement /// 4263 // chymotrypsin activity // inferred from electronic annotation /// 4295 // trypsin activity // inferred from electronic annotation /// 5515 // protein binding // inferred from physical interaction /// 4252 // serin…	6508 // proteolysis // non-traceable author statement /// 6508 // proteolysis // inferred from electronic annotation	---	IPR001254 // Peptidase S1, chymotrypsin // 3.1E-39
4830	146029_at	-0.839883	2.25522	-11.6532	6.01979e-13	2.09434e-11	19.2519	FBgn0032035	CG13393	CG13393	CG13393	34159	4576 // oligosaccharyl transferase activity // inferred from sequence or structural similarity /// 4576 // oligosaccharyl transferase activity // inferred from sequence similarity	6486 // protein amino acid glycosylation // inferred from electronic annotation /// 6916 // anti-apoptosis // non-traceable author statement /// 43066 // negative regulation of apoptosis // non-traceable author statement /// 6915 // apoptosis // inferred from electronic annotation	5886 // plasma membrane // non-traceable author statement /// 8250 // oligosaccharyl transferase complex // inferred from sequence or structural similarity /// 16020 // membrane // inferred from electronic annotation /// 16021 // integral to membrane // inferred from electronic annotation /// 8250 // oligosaccharyl transferase complex // inferred from sequence similarity	IPR003038 // Defender against death DAD protein // 5.1E-69
11800	152999_at	-0.913922	1.87521	-11.6528	6.02442e-13	2.09434e-11	19.2511	FBgn0031305	CG4715	Iris	Iris	33290	---	9993 // oogenesis (sensu Insecta) // non-traceable author statement	---	---
7439	148638_at	-1.47658	2.30322	-11.6456	6.12116e-13	2.12271e-11	19.2349	FBgn0027843	CG6906	CAH2	Carbonic anhydrase 2	39390	4089 // carbonate dehydratase activity // inferred from sequence or structural similarity /// 4089 // carbonate dehydratase activity // non-traceable author statement /// 8270 // zinc ion binding // inferred from electronic annotation /// 5515 // protein binding // inferred from physical interaction /// 4089 // carbonate dehydratase activity // inferred from electronic annotation /// 4089 // carb…	6730 // one-carbon compound metabolism // inferred from electronic annotation	---	IPR001148 // Carbonic anhydrase, eukaryotic // 9.3E-57
1952	143151_at	-1.17699	4.89511	-11.6106	6.61283e-13	2.28191e-11	19.1565	FBgn0000592	CG6917	Est-6	Esterase 6	39392	4091 // carboxylesterase activity // non-traceable author statement /// 4091 // carboxylesterase activity // traceable author statement /// 5102 // receptor binding // inferred from electronic annotation /// 3824 // catalytic activity // inferred from electronic annotation /// 4091 // carboxylesterase activity // inferred from electronic annotation /// 4759 // serine esterase activity // inferred…	7165 // signal transduction // inferred from electronic annotation /// 7267 // cell-cell signaling // inferred from electronic annotation /// 7618 // mating // traceable author statement /// 7619 // courtship behavior // inferred from mutant phenotype /// 19953 // sexual reproduction // non-traceable author statement /// 30728 // ovulation // traceable author statement /// 42811 // pheromone bios…	---	IPR002018 // Carboxylesterase, type B // 1.0E-126 /// IPR002018 // Carboxylesterase, type B // 1.0E-126
5462	146661_at	-0.534363	0.569388	-11.5622	7.36165e-13	2.52786e-11	19.0477	FBgn0033048	CG7881	CG7881	CG7881	35521	5316 // high affinity inorganic phosphate:sodium symporter activity // inferred from sequence or structural similarity /// 5215 // transporter activity // inferred from electronic annotation /// 5316 // high affinity inorganic phosphate:sodium symporter activity // inferred from sequence similarity	6796 // phosphate metabolism // inferred from electronic annotation /// 6812 // cation transport // inferred from electronic annotation /// 6817 // phosphate transport // inferred from electronic annotation /// 6858 // extracellular transport // inferred from electronic annotation /// 6810 // transport // inferred from electronic annotation	16021 // integral to membrane // inferred from electronic annotation /// 16020 // membrane // inferred from electronic annotation	---
11582	152781_at	-1.10056	1.94028	-11.5131	8.20994e-13	2.8054e-11	18.937	FBgn0004654	CG3724	Pgd	Phosphogluconate dehydrogenase	31185	4616 // phosphogluconate dehydrogenase (decarboxylating) activity // non-traceable author statement /// 4616 // phosphogluconate dehydrogenase (decarboxylating) activity // traceable author statement /// 4616 // phosphogluconate dehydrogenase (decarboxylating) activity // inferred from electronic annotation /// 16491 // oxidoreductase activity // inferred from electronic annotation /// 50661 // N…	6098 // pentose-phosphate shunt // non-traceable author statement /// 6098 // pentose-phosphate shunt // inferred from electronic annotation /// 9051 // pentose-phosphate shunt, oxidative branch // inferred from electronic annotation /// 19521 // D-gluconate metabolism // inferred from electronic annotation	---	IPR006114 // 6-phosphogluconate dehydrogenase, C-terminal // 1.0E-126 /// IPR006115 // 6-phosphogluconate dehydrogenase, NAD binding domain // 1.0E-126
11170	152369_at	-1.47825	3.60346	-11.5027	8.40205e-13	2.8571e-11	18.9136	FBgn0032049	CG13095	CG13095	CG13095	34182	4190 // aspartic-type endopeptidase activity // inferred from sequence or structural similarity /// 4194 // pepsin A activity // inferred from electronic annotation /// 4190 // aspartic-type endopeptidase activity // inferred from electronic annotation /// 8233 // peptidase activity // inferred from electronic annotation /// 16787 // hydrolase activity // inferred from electronic annotation /// 4…	6508 // proteolysis // inferred from electronic annotation	---	IPR001461 // Peptidase A1, pepsin // 1.0E-126
9996	151195_i_at	-0.658697	1.71436	-11.4708	9.01892e-13	3.05206e-11	18.8417	FBgn0040718	CG15353	CG15353	CG15353	50191	---	---	---	---
3170	144369_at	-0.742853	0.830749	-11.423	1.00353e-12	3.34748e-11	18.7334	FBgn0040364	CG11378	CG11378	CG11378	31060	---	---	---	IPR009832 // Protein of unknown function DUF1397 // 1.0E-126
106	141305_at	-0.844379	1.29654	-11.3984	1.06013e-12	3.51955e-11	18.6777	FBgn0038466	CG8907	CG8907	CG8907	42050	5515 // protein binding // inferred from physical interaction	7275 // development // inferred from electronic annotation	---	IPR001452 // SH3 // 4.5E-8
9252	150451_at	-0.590677	1.28338	-11.3726	1.12328e-12	3.72035e-11	18.619	FBgn0039085	CG10170	CG10170	CG10170	42774	3851 // 2-hydroxyacylsphingosine 1-beta-galactosyltransferase activity // inferred from sequence or structural similarity /// 16758 // transferase activity, transferring hexosyl groups // inferred from electronic annotation /// 3851 // 2-hydroxyacylsphingosine 1-beta-galactosyltransferase activity // inferred from sequence similarity	5976 // polysaccharide metabolism // inferred from electronic annotation /// 6952 // defense response // inferred from electronic annotation /// 8202 // steroid metabolism // inferred from electronic annotation /// 9636 // response to toxin // inferred from electronic annotation /// 8152 // metabolism // inferred from electronic annotation	---	IPR002213 // UDP-glucoronosyl/UDP-glucosyl transferase // 1.5E-38
9429	150628_at	-0.622624	1.41773	-11.3586	1.15918e-12	3.83023e-11	18.5871	FBgn0039390	CG8932	CG8932	CG8932	43137	8324 // cation transporter activity // inferred from electronic annotation /// 8523 // sodium-dependent multivitamin transporter activity // inferred from sequence or structural similarity /// 5515 // protein binding // inferred from physical interaction /// 5215 // transporter activity // inferred from electronic annotation /// 8523 // sodium-dependent multivitamin transporter activity // inferr…	6732 // coenzyme metabolism // inferred from electronic annotation /// 6812 // cation transport // inferred from electronic annotation /// 6858 // extracellular transport // inferred from electronic annotation /// 51189 // prosthetic group metabolism // inferred from electronic annotation /// 6810 // transport // inferred from electronic annotation /// 6811 // ion transport // inferred from elect…	16020 // membrane // inferred from electronic annotation /// 16021 // integral to membrane // inferred from electronic annotation	---
1470	142669_at	-0.640363	1.43603	-11.3318	1.23097e-12	4.05784e-11	18.5261	FBgn0014868	CG9022	Ost48	Oligosaccharyltransferase 48kD subunit	31849	4579 // dolichyl-diphosphooligosaccharide-protein glycotransferase activity // inferred from sequence or structural similarity /// 4579 // dolichyl-diphosphooligosaccharide-protein glycotransferase activity // inferred from electronic annotation /// 16740 // transferase activity // inferred from electronic annotation /// 4579 // dolichyl-diphosphooligosaccharide-protein glycotransferase activity …	6487 // protein amino acid N-linked glycosylation // non-traceable author statement /// 18279 // protein amino acid N-linked glycosylation via asparagine // inferred from electronic annotation	5789 // endoplasmic reticulum membrane // inferred from electronic annotation /// 5783 // endoplasmic reticulum // inferred from electronic annotation /// 16020 // membrane // inferred from electronic annotation /// 16021 // integral to membrane // inferred from electronic annotation	IPR005013 // Dolichyl-diphosphooligosaccharide-protein glycosyltransferase 48kDa subunit // 1.0E-126
2004	143203_at	-0.819642	1.88882	-11.3298	1.23644e-12	4.06631e-11	18.5216	FBgn0001263	CG3504	inaD	inactivation no afterpotential D	37629	5198 // structural molecule activity // inferred from direct assay /// 5198 // structural molecule activity // inferred from mutant phenotype /// 5515 // protein binding // inferred from sequence or structural similarity /// 5516 // calmodulin binding // traceable author statement /// 17022 // myosin binding // traceable author statement /// 30159 // receptor signaling complex scaffold activity /…	6605 // protein targeting // inferred from electronic annotation /// 7166 // cell surface receptor linked signal transduction // inferred from electronic annotation /// 7602 // phototransduction // inferred from mutant phenotype /// 7602 // phototransduction // inferred from physical interaction /// 7602 // phototransduction // non-traceable author statement /// 8104 // protein localization // tr…	16027 // inaD signaling complex // inferred from physical interaction /// 16027 // inaD signaling complex // traceable author statement /// 16028 // rhabdomere // inferred from direct assay /// 16020 // membrane // inferred from electronic annotation	IPR001478 // PDZ/DHR/GLGF domain // 2.8E-17 /// IPR001478 // PDZ/DHR/GLGF domain // 5.1E-7 /// IPR001478 // PDZ/DHR/GLGF domain // 6.2E-9 /// IPR001478 // PDZ/DHR/GLGF domain // 3.6E-8
1191	142390_at	-1.02755	2.15346	-11.3152	1.27764e-12	4.19197e-11	18.4883	FBgn0031538	CG3246	CG3246	CG3246	33564	---	---	---	---
6260	147459_at	-1.37837	4.63721	-11.2945	1.33865e-12	4.38188e-11	18.441	FBgn0034382	CG18609	CG18609	CG18609	37158	8415 // acyltransferase activity // inferred from electronic annotation /// 16740 // transferase activity // inferred from electronic annotation	6629 // lipid metabolism // inferred from electronic annotation /// 6631 // fatty acid metabolism // inferred from electronic annotation	16021 // integral to membrane // inferred from electronic annotation	---
11620	152819_at	-0.883374	1.31197	-11.2878	1.35882e-12	4.41696e-11	18.4258	FBgn0038733	CG11407	CG11407	CG11407	42354	5324 // long-chain fatty acid transporter activity // inferred from sequence or structural similarity /// 16874 // ligase activity // inferred from electronic annotation /// 5515 // protein binding // inferred from physical interaction /// 3824 // catalytic activity // inferred from electronic annotation /// 5324 // long-chain fatty acid transporter activity // inferred from sequence similarity	8152 // metabolism // inferred from electronic annotation	---	IPR000873 // AMP-dependent synthetase and ligase // 9.1E-88
369	141568_at	-0.99655	2.75306	-11.2692	1.41701e-12	4.58481e-11	18.3833	FBgn0030362	CG1803	regucalcin	regucalcin	32165	5515 // protein binding // inferred from physical interaction /// 4801 // transaldolase activity // inferred from electronic annotation /// 16740 // transferase activity // inferred from electronic annotation	9948 // anterior/posterior axis specification // inferred from electronic annotation /// 19722 // calcium-mediated signaling // inferred from electronic annotation /// 5975 // carbohydrate metabolism // inferred from electronic annotation /// 6098 // pentose-phosphate shunt // inferred from electronic annotation	5737 // cytoplasm // inferred from electronic annotation	IPR005511 // Senescence marker protein-30 (SMP-30) // 1.0E-126 /// IPR005511 // Senescence marker protein-30 (SMP-30) // 1.0E-126
1693	142892_at	-0.735359	3.2852	-11.263	1.43707e-12	4.63901e-11	18.369	FBgn0053113	CG33113	Rtnl1	Rtnl1	33721	5057 // receptor signaling protein activity // inferred from electronic annotation /// 5509 // calcium ion binding // inferred from electronic annotation	6886 // intracellular protein transport // inferred from electronic annotation	5783 // endoplasmic reticulum // inferred from electronic annotation	IPR003388 // Reticulon // 3.7E-115 /// IPR003388 // Reticulon // 2.5E-116 /// IPR003388 // Reticulon // 2.5E-116 /// IPR003388 // Reticulon // 2.5E-116 /// IPR003388 // Reticulon // 2.5E-116 /// IPR003388 // Reticulon // 3.7E-115
6278	147477_at	-0.717308	1.36052	-11.2609	1.44391e-12	4.65037e-11	18.3642	FBgn0034415	CG15116	CG15116	CG15116	37194	4602 // glutathione peroxidase activity // inferred from sequence or structural similarity /// 5515 // protein binding // inferred from physical interaction /// 4601 // peroxidase activity // inferred from electronic annotation /// 4602 // glutathione peroxidase activity // inferred from electronic annotation /// 16491 // oxidoreductase activity // inferred from electronic annotation /// 4602 // …	6800 // oxygen and reactive oxygen species metabolism // inferred from electronic annotation /// 6950 // response to stress // inferred from electronic annotation /// 6952 // defense response // inferred from electronic annotation /// 6979 // response to oxidative stress // inferred from electronic annotation /// 8202 // steroid metabolism // inferred from electronic annotation /// 9636 // respon…	---	IPR000889 // Glutathione peroxidase // 2.0E-37
11004	152203_at	-0.949007	0.633021	-11.2571	1.45639e-12	4.67982e-11	18.3555	FBgn0002936	CG3966	ninaA	neither inactivation nor afterpotential A	33271	3755 // peptidyl-prolyl cis-trans isomerase activity // inferred from sequence or structural similarity /// 3755 // peptidyl-prolyl cis-trans isomerase activity // non-traceable author statement /// 3755 // peptidyl-prolyl cis-trans isomerase activity // traceable author statement /// 16018 // cyclosporin A binding // inferred from mutant phenotype /// 3755 // peptidyl-prolyl cis-trans isomerase …	6458 // 'de novo' protein folding // non-traceable author statement /// 6458 // 'de novo' protein folding // traceable author statement /// 6605 // protein targeting // inferred from electronic annotation /// 6810 // transport // traceable author statement /// 6952 // defense response // inferred from electronic annotation /// 7602 // phototransduction // inferred from physical interaction /// 76…	5624 // membrane fraction // inferred from direct assay /// 5635 // nuclear envelope // inferred from direct assay /// 5887 // integral to plasma membrane // non-traceable author statement /// 16021 // integral to membrane // inferred from direct assay /// 16022 // endoplasmic reticulum cisterna // inferred from direct assay /// 16023 // cytoplasmic membrane-bound vesicle // inferred from direct …	IPR002130 // Peptidyl-prolyl cis-trans isomerase, cyclophilin type // 1.7E-91
3025	144224_at	-0.733066	2.0435	-11.2356	1.52858e-12	4.90055e-11	18.3064	FBgn0028516	CG3994	CG3994	CG3994	34890	5385 // zinc ion transporter activity // inferred from sequence or structural similarity /// 46873 // metal ion transporter activity // inferred from sequence or structural similarity /// 8324 // cation transporter activity // inferred from electronic annotation /// 5385 // zinc ion transporter activity // inferred from sequence similarity /// 46873 // metal ion transporter activity // inferred f…	6812 // cation transport // inferred from electronic annotation	16020 // membrane // inferred from electronic annotation	IPR002524 // Cation efflux protein // 3.4E-79 /// IPR002524 // Cation efflux protein // 3.4E-79
5304	146503_at	-0.831722	2.93795	-11.1903	1.69338e-12	5.40415e-11	18.2025	FBgn0041180	CG10363	TepIV	Thiolester containing protein IV	35248	4866 // endopeptidase inhibitor activity // inferred from electronic annotation /// 5351 // sugar porter activity // inferred from electronic annotation /// 30414 // protease inhibitor activity // inferred from sequence or structural similarity /// 30414 // protease inhibitor activity // inferred from sequence similarity	6961 // antibacterial humoral response (sensu Protostomia) // inferred from direct assay /// 9401 // phosphoenolpyruvate-dependent sugar phosphotransferase system // inferred from electronic annotation	---	IPR001599 // Alpha-2-macroglobulin // 1.4E-100 /// IPR002890 // Alpha-2-macroglobulin, N-terminal // 1.9E-16 /// IPR002890 // Alpha-2-macroglobulin, N-terminal // 7.5E-11 /// IPR002890 // Alpha-2-macroglobulin, N-terminal // 3.1E-9
4467	145666_at	-0.911322	3.08544	-11.1843	1.71647e-12	5.453e-11	18.1888	FBgn0031459	CG2862	CG2862	CG2862	33471	8252 // nucleotidase activity // inferred from sequence or structural similarity /// 19204 // nucleotide phosphatase activity // inferred from electronic annotation /// 8252 // nucleotidase activity // inferred from sequence similarity	---	---	IPR001310 // Histidine triad (HIT) protein // 4.3E-58 /// IPR001310 // Histidine triad (HIT) protein // 4.3E-58
8808	150007_at	-0.617762	0.711113	-11.1659	1.78977e-12	5.66021e-11	18.1463	FBgn0038419	CG14879	CG14879	CG14879	41982	5529 // sugar binding // inferred from electronic annotation	---	---	---
8474	149673_at	-0.498458	3.02704	-11.1557	1.83166e-12	5.77963e-11	18.1229	FBgn0037873	CG6666	CG6666	CG6666	41340	104 // succinate dehydrogenase activity // inferred from sequence or structural similarity /// 8177 // succinate dehydrogenase (ubiquinone) activity // inferred from sequence or structural similarity /// 104 // succinate dehydrogenase activity // inferred from electronic annotation /// 104 // succinate dehydrogenase activity // inferred from sequence similarity /// 8177 // succinate dehydrogenase…	6099 // tricarboxylic acid cycle // inferred from sequence or structural similarity /// 6105 // succinate metabolism // inferred from sequence or structural similarity /// 6121 // mitochondrial electron transport, succinate to ubiquinone // inferred from sequence or structural similarity /// 6099 // tricarboxylic acid cycle // inferred from electronic annotation /// 6118 // electron transport // …	5749 // respiratory chain complex II (sensu Eukaryota) // inferred from sequence or structural similarity /// 16020 // membrane // inferred from electronic annotation /// 5749 // respiratory chain complex II (sensu Eukaryota) // inferred from sequence similarity	IPR000701 // Succinate dehydrogenase, cytochrome b subunit // 5.5E-52
11583	152782_at	-0.66824	0.0970896	-11.1308	1.93775e-12	6.10066e-11	18.0657	FBgn0037721	CG9427	CG9427	CG9427	41164	---	---	---	IPR004911 // Gamma interferon inducible lysosomal thiol reductase GILT // 9.6E-52
9510	150709_at	-0.815023	1.95327	-11.1115	2.02475e-12	6.36025e-11	18.0212	FBgn0039483	CG14259	CG14259	CG14259	43261	---	---	---	IPR004272 // Odorant binding protein // 1.2E-56
4645	145844_at	-1.04704	2.45703	-11.106	2.05039e-12	6.4264e-11	18.0084	FBgn0031734	CG11147	CG11147	CG11147	33803	5215 // transporter activity // inferred from sequence or structural similarity /// 5524 // ATP binding // inferred from electronic annotation /// 42626 // ATPase activity, coupled to transmembrane movement of substances // inferred from sequence or structural similarity /// 166 // nucleotide binding // inferred from electronic annotation /// 16887 // ATPase activity // inferred from electronic a…	6810 // transport // inferred from electronic annotation	16020 // membrane // inferred from electronic annotation /// 43190 // ATP-binding cassette (ABC) transporter complex // inferred from sequence or structural similarity /// 43190 // ATP-binding cassette (ABC) transporter complex // inferred from sequence similarity	IPR003439 // ABC transporter // 3.3E-46
6365	147564_at	-0.962706	2.44595	-11.1003	2.07708e-12	6.49551e-11	17.9953	FBgn0034538 /// FBgn0074186	CG16799	CG16799 /// DpseGA14157	CG16799 /// GA14157	37340	3796 // lysozyme activity // non-traceable author statement	5984 // disaccharide metabolism // inferred from electronic annotation /// 6917 // induction of apoptosis // inferred from electronic annotation /// 6952 // defense response // inferred from sequence or structural similarity /// 6960 // antimicrobial humoral response (sensu Protostomia) // non-traceable author statement /// 6952 // defense response // inferred from sequence similarity	5576 // extracellular region // inferred from electronic annotation	IPR001916 // Glycoside hydrolase, family 22 // 5.3E-33
12736	153935_at	-0.533755	2.97501	-11.0843	2.15421e-12	6.7217e-11	17.9583	FBgn0034277	CG6370	CG6370	CG6370	37029	4579 // dolichyl-diphosphooligosaccharide-protein glycotransferase activity // inferred from sequence or structural similarity /// 4579 // dolichyl-diphosphooligosaccharide-protein glycotransferase activity // inferred from electronic annotation /// 4579 // dolichyl-diphosphooligosaccharide-protein glycotransferase activity // inferred from sequence similarity	6464 // protein modification // inferred from electronic annotation /// 18279 // protein amino acid N-linked glycosylation via asparagine // inferred from electronic annotation	5789 // endoplasmic reticulum membrane // inferred from electronic annotation /// 8250 // oligosaccharyl transferase complex // inferred from electronic annotation	IPR008814 // Ribophorin II // 1.0E-126
10117	151316_at	-0.499334	0.795811	-10.9812	2.7256e-12	8.46687e-11	17.7196	FBgn0040843	CG15213	CG15213	CG15213	50316	---	---	---	---
12621	153820_at	-0.862834	2.4784	-10.9743	2.76889e-12	8.58233e-11	17.7036	FBgn0038985	CG6921	CG6921	CG6921	42657	8415 // acyltransferase activity // inferred from electronic annotation /// 16740 // transferase activity // inferred from electronic annotation	6629 // lipid metabolism // inferred from electronic annotation /// 6631 // fatty acid metabolism // inferred from electronic annotation	16021 // integral to membrane // inferred from electronic annotation	IPR002076 // GNS1/SUR4 membrane protein // 1.7E-13
7958	149157_at	-0.647421	0.977743	-10.9578	2.87589e-12	8.8943e-11	17.6651	FBgn0037039	CG10587	CG10587	CG10587	40318	4175 // endopeptidase activity // inferred from sequence or structural similarity /// 4263 // chymotrypsin activity // inferred from electronic annotation /// 4295 // trypsin activity // non-traceable author statement /// 4175 // endopeptidase activity // inferred from sequence similarity	6508 // proteolysis // non-traceable author statement	---	IPR001254 // Peptidase S1, chymotrypsin // 1.3E-51
10828	152027_at	-0.856286	2.16831	-10.9068	3.23286e-12	9.9763e-11	17.5464	FBgn0035076	CG10142	Ance-5	Ance-5	37980	4246 // peptidyl-dipeptidase A activity // inferred from electronic annotation /// 8233 // peptidase activity // inferred from sequence or structural similarity /// 8241 // peptidyl-dipeptidase activity // non-traceable author statement /// 8233 // peptidase activity // inferred from sequence similarity	6508 // proteolysis // inferred from electronic annotation /// 9306 // protein secretion // inferred from electronic annotation	16020 // membrane // inferred from electronic annotation	IPR001548 // Peptidase M2, peptidyl-dipeptidase A // 2.8E-31
1237	142436_at	-0.560247	1.04496	-10.9021	3.26804e-12	1.00627e-10	17.5354	FBgn0051493	CG31493	CG31493	CG31493	318765	---	---	---	---
4161	145360_at	-0.60664	1.21406	-10.8927	3.33897e-12	1.02585e-10	17.5137	FBgn0031004	CG7992	CG7992	CG7992	32917	---	---	---	---
1119	142318_at	-0.698324	1.73611	-10.8529	3.66014e-12	1.11718e-10	17.4205	FBgn0037433	CG17919	CG17919	CG17919	40780	8429 // phosphatidylethanolamine binding // inferred from sequence or structural similarity /// 19210 // kinase inhibitor activity // inferred from electronic annotation /// 8429 // phosphatidylethanolamine binding // inferred from sequence similarity	7165 // signal transduction // inferred from electronic annotation	---	IPR008914 // PEBP // 7.6E-63
2731	143930_at	-1.19044	3.06428	-10.847	3.70964e-12	1.12983e-10	17.4068	FBgn0020509	CG1262	Acp62F	Accessory gland peptide 62F	38340	4867 // serine-type endopeptidase inhibitor activity // inferred from direct assay /// 4867 // serine-type endopeptidase inhibitor activity // inferred from sequence or structural similarity /// 30414 // protease inhibitor activity // traceable author statement /// 4867 // serine-type endopeptidase inhibitor activity // inferred from sequence similarity	7582 // physiological process // non-traceable author statement /// 8340 // determination of adult life span // non-traceable author statement /// 30162 // regulation of proteolysis // traceable author statement /// 45297 // post-mating behavior // non-traceable author statement /// 45861 // negative regulation of proteolysis // inferred from sequence or structural similarity /// 45861 // negativ…	---	IPR002919 // Trypsin inhibitor-like, cysteine-rich TIL region // 1.4E-20
4697	145896_at	-0.672819	1.4362	-10.8407	3.7646e-12	1.14408e-10	17.3919	FBgn0031809	---	CG9508	CG9508	33893	4245 // neprilysin activity // inferred from sequence or structural similarity /// 8270 // zinc ion binding // inferred from electronic annotation /// 4245 // neprilysin activity // inferred from sequence similarity	6508 // proteolysis // inferred from electronic annotation /// 7155 // cell adhesion // inferred from electronic annotation	16020 // membrane // inferred from electronic annotation	IPR000718 // Peptidase M13, neprilysin // 8.6E-8 /// IPR007110 // Immunoglobulin-like // 6.7E-5 /// IPR007110 // Immunoglobulin-like // 7.1E-8
10594	151793_at	-1.41933	4.72148	-10.8231	3.92e-12	1.18616e-10	17.3509	FBgn0035665	CG6483	Jon65Aiii	Jonah 65Aiii	38683	4252 // serine-type endopeptidase activity // inferred from sequence or structural similarity /// 4263 // chymotrypsin activity // inferred from electronic annotation /// 4295 // trypsin activity // inferred from electronic annotation /// 42708 // elastase activity // non-traceable author statement /// 5515 // protein binding // inferred from physical interaction /// 4252 // serine-type endopepti…	6508 // proteolysis // non-traceable author statement /// 6508 // proteolysis // inferred from electronic annotation	---	IPR001254 // Peptidase S1, chymotrypsin // 2.2E-56
7096	148295_at	-0.634024	2.6953	-10.7792	4.33917e-12	1.30467e-10	17.2478	FBgn0035726	CG9953	CG9953	CG9953	38763	4188 // serine-type Pro-X carboxypeptidase activity // inferred from sequence or structural similarity /// 3824 // catalytic activity // inferred from electronic annotation /// 8233 // peptidase activity // inferred from electronic annotation /// 8236 // serine-type peptidase activity // inferred from electronic annotation /// 4188 // serine-type Pro-X carboxypeptidase activity // inferred from s…	6508 // proteolysis // inferred from electronic annotation	5764 // lysosome // inferred from electronic annotation	IPR008758 // Peptidase S28 // 1.0E-126
2597	143796_at	-0.583201	0.975602	-10.7757	4.37383e-12	1.31215e-10	17.2397	FBgn0015316	CG9564	Try29F	Trypsin 29F	34226	4263 // chymotrypsin activity // inferred from electronic annotation /// 4295 // trypsin activity // inferred from sequence or structural similarity /// 4295 // trypsin activity // non-traceable author statement /// 8233 // peptidase activity // inferred from electronic annotation /// 8236 // serine-type peptidase activity // inferred from electronic annotation /// 4252 // serine-type endopeptida…	6508 // proteolysis // non-traceable author statement /// 6508 // proteolysis // inferred from electronic annotation	---	IPR001254 // Peptidase S1, chymotrypsin // 7.3E-89
11733	152932_at	-0.504252	0.835235	-10.765	4.48425e-12	1.3424e-10	17.2144	FBgn0000527	CG3331	e	ebony	42521	3833 // beta-alanyl-dopamine synthase activity // inferred from direct assay /// 3833 // beta-alanyl-dopamine synthase activity // inferred from mutant phenotype /// 3833 // beta-alanyl-dopamine synthase activity // traceable author statement /// 16874 // ligase activity // inferred from electronic annotation /// 48037 // cofactor binding // inferred from electronic annotation /// 5515 // protein…	1692 // histamine metabolism // inferred from mutant phenotype /// 6583 // melanin biosynthesis from tyrosine // traceable author statement /// 6952 // defense response // inferred from electronic annotation /// 7593 // cuticle tanning // inferred from mutant phenotype /// 7623 // circadian rhythm // non-traceable author statement /// 42417 // dopamine metabolism // inferred from direct assay ///…	---	IPR000873 // AMP-dependent synthetase and ligase // 5.5E-109
11009	152208_at	-0.712134	1.71565	-10.7297	4.86647e-12	1.45372e-10	17.1314	FBgn0010470	CG9847	Fkbp13	Fkbp13	37449	3755 // peptidyl-prolyl cis-trans isomerase activity // inferred from sequence or structural similarity /// 5509 // calcium ion binding // inferred from electronic annotation /// 5528 // FK506 binding // inferred from sequence or structural similarity /// 3755 // peptidyl-prolyl cis-trans isomerase activity // inferred from electronic annotation /// 16853 // isomerase activity // inferred from el…	6457 // protein folding // inferred from electronic annotation	5783 // endoplasmic reticulum // inferred from electronic annotation	IPR002048 // Calcium-binding EF-hand // 0.033 /// IPR002048 // Calcium-binding EF-hand // 2.0E-4 /// IPR001179 // Peptidylprolyl isomerase, FKBP-type // 1.3E-55 /// IPR002048 // Calcium-binding EF-hand // 0.033 /// IPR002048 // Calcium-binding EF-hand // 2.0E-4 /// IPR001179 // Peptidylprolyl isomerase, FKBP-type // 1.3E-55
11133	152332_at	-0.718899	3.16262	-10.7049	5.15513e-12	1.52692e-10	17.073	FBgn0030251	CG2145	CG2145	CG2145	32027	8236 // serine-type peptidase activity // inferred from sequence or structural similarity /// 8236 // serine-type peptidase activity // inferred from sequence similarity	---	---	---
1463	142662_at	-0.698866	0.773492	-10.6828	5.42677e-12	1.59725e-10	17.0209	FBgn0038613	CG7678	CG7678	CG7678	42214	8553 // hydrogen-exporting ATPase activity, phosphorylative mechanism // inferred from sequence or structural similarity /// 8553 // hydrogen-exporting ATPase activity, phosphorylative mechanism // inferred from sequence similarity	6812 // cation transport // inferred from electronic annotation /// 15992 // proton transport // inferred from electronic annotation	220 // hydrogen-transporting ATPase V0 domain // inferred from sequence or structural similarity /// 16020 // membrane // inferred from electronic annotation /// 220 // hydrogen-transporting ATPase V0 domain // inferred from sequence similarity	IPR002490 // V-type ATPase, 116 kDa subunit // 1.0E-126
5187	146386_at	-0.621055	1.60306	-10.6834	5.41965e-12	1.59725e-10	17.0222	FBgn0032614	CG13284	CG13284	CG13284	35021	16229 // steroid dehydrogenase activity // inferred from sequence or structural similarity /// 16491 // oxidoreductase activity // inferred from electronic annotation /// 16229 // steroid dehydrogenase activity // inferred from sequence similarity	8202 // steroid metabolism // inferred from electronic annotation /// 8152 // metabolism // inferred from electronic annotation	---	IPR002198 // Short-chain dehydrogenase/reductase SDR // 1.1E-41 /// IPR002198 // Short-chain dehydrogenase/reductase SDR // 1.1E-41
6813	148012_at	-0.545986	0.599366	-10.67	5.59052e-12	1.63856e-10	16.9907	FBgn0035287	CG13937	CG13937	CG13937	38249	16232 // HNK-1 sulfotransferase activity // inferred from sequence or structural similarity /// 16232 // HNK-1 sulfotransferase activity // inferred from sequence similarity	---	---	IPR005331 // Chondroitin 4-O-sulfotransferase // 1.1E-45 /// IPR005331 // Chondroitin 4-O-sulfotransferase // 1.1E-45
4597	145796_at	-1.69305	0.958421	-10.6605	5.71545e-12	1.67168e-10	16.9683	FBgn0031654	CG8869	Jon25Bii	Jonah 25Bii	33707	4252 // serine-type endopeptidase activity // non-traceable author statement /// 4263 // chymotrypsin activity // inferred from sequence or structural similarity /// 4295 // trypsin activity // inferred from electronic annotation /// 4252 // serine-type endopeptidase activity // inferred from electronic annotation /// 4263 // chymotrypsin activity // inferred from sequence similarity	6508 // proteolysis // non-traceable author statement /// 6508 // proteolysis // inferred from electronic annotation	---	IPR001254 // Peptidase S1, chymotrypsin // 1.1E-57
5538	146737_at	-0.779022	2.23364	-10.6521	5.82892e-12	1.70132e-10	16.9484	FBgn0033167	CG1701	CG1701	CG1701	35661	---	---	---	---
328	141527_at	-0.769856	2.90779	-10.6367	6.04148e-12	1.75969e-10	16.912	FBgn0023479	CG4821	Tequila	Tequila	39048	4252 // serine-type endopeptidase activity // inferred from sequence or structural similarity /// 4252 // serine-type endopeptidase activity // non-traceable author statement /// 4263 // chymotrypsin activity // inferred from electronic annotation /// 4295 // trypsin activity // non-traceable author statement /// 5044 // scavenger receptor activity // inferred from electronic annotation /// 5524 …	6030 // chitin metabolism // inferred from electronic annotation /// 6508 // proteolysis // non-traceable author statement /// 15986 // ATP synthesis coupled proton transport // inferred from electronic annotation /// 6508 // proteolysis // inferred from electronic annotation	5576 // extracellular region // inferred from electronic annotation /// 16020 // membrane // inferred from electronic annotation /// 16469 // proton-transporting two-sector ATPase complex // inferred from electronic annotation /// 16021 // integral to membrane // inferred from electronic annotation	IPR002172 // Low density lipoprotein-receptor, class A // 2.6E-6 /// IPR002172 // Low density lipoprotein-receptor, class A // 4.5E-12 /// IPR001190 // Speract/scavenger receptor // 2.8E-23 /// IPR001190 // Speract/scavenger receptor // 5.9E-28 /// IPR001254 // Peptidase S1, chymotrypsin // 1.4E-82 /// IPR002557 // Chitin binding Peritrophin-A // 1.8E-19 /// IPR002557 // Chitin binding Peritrophi…
1772	142971_at	-0.792613	2.07051	-10.6291	6.14993e-12	1.78756e-10	16.894	FBgn0003638	CG3019	su(w<up>a</up>)	suppressor of white-apricot	31054	3723 // RNA binding // inferred from electronic annotation	398 // nuclear mRNA splicing, via spliceosome // non-traceable author statement /// 398 // nuclear mRNA splicing, via spliceosome // inferred from electronic annotation /// 6350 // transcription // inferred from electronic annotation /// 6355 // regulation of transcription, DNA-dependent // inferred from electronic annotation /// 6396 // RNA processing // inferred from electronic annotation /// 6…	5634 // nucleus // non-traceable author statement /// 5681 // spliceosome complex // non-traceable author statement /// 5634 // nucleus // inferred from electronic annotation	IPR000061 // SWAP/Surp // 4.8E-22 /// IPR000061 // SWAP/Surp // 1.9E-20
947	142146_at	-0.800406	0.86044	-10.6255	6.20142e-12	1.79551e-10	16.8855	FBgn0032067	CG9465	CG9465	CG9465	34204	4559 // alpha-mannosidase activity // inferred from sequence or structural similarity /// 16799 // hydrolase activity, hydrolyzing N-glycosyl compounds // inferred from electronic annotation /// 4559 // alpha-mannosidase activity // inferred from sequence similarity	5975 // carbohydrate metabolism // inferred from electronic annotation	5764 // lysosome // inferred from sequence or structural similarity /// 5764 // lysosome // inferred from sequence similarity	IPR000602 // Glycoside hydrolase, family 38 // 1.0E-126
6127	147326_at	-0.504238	0.748117	-10.6168	6.32911e-12	1.82826e-10	16.8648	FBgn0034151	CG15617	CG15617	CG15617	36871	5515 // protein binding // inferred from electronic annotation	---	---	IPR001478 // PDZ/DHR/GLGF domain // 6.1E-6
2472	143671_at	-0.683301	5.90365	-10.5963	6.63934e-12	1.91e-10	16.8163	FBgn0011668	CG9074	Mst57Da	Male-specific RNA 57Da	47954	5515 // protein binding // inferred from physical interaction	6952 // defense response // inferred from sequence or structural similarity /// 18991 // oviposition // non-traceable author statement /// 45297 // post-mating behavior // non-traceable author statement /// 7610 // behavior // inferred from electronic annotation /// 6952 // defense response // inferred from sequence similarity	5576 // extracellular region // non-traceable author statement	---
9454	150653_at	-0.862692	1.04103	-10.5943	6.67097e-12	1.91517e-10	16.8115	FBgn0039418	CG6069	CG6069	CG6069	43181	4252 // serine-type endopeptidase activity // non-traceable author statement /// 4295 // trypsin activity // inferred from electronic annotation /// 4252 // serine-type endopeptidase activity // inferred from electronic annotation	6508 // proteolysis // inferred from electronic annotation	---	IPR001254 // Peptidase S1, chymotrypsin // 4.1E-11
217	141416_at	-1.03656	0.864768	-10.582	6.86562e-12	1.96702e-10	16.7823	FBgn0036831	CG6839	CG6839	CG6839	40067	3676 // nucleic acid binding // inferred from electronic annotation /// 4519 // endonuclease activity // inferred from electronic annotation	---	---	IPR001604 // DNA/RNA non-specific endonuclease // 6.3E-80
7881	149080_at	-0.529667	0.864036	-10.5758	6.9653e-12	1.98745e-10	16.7677	FBgn0036922	CG14182	CG14182	CG14182	40181	---	---	---	---
547	141746_at	-0.66531	1.40903	-10.5639	7.1627e-12	2.03069e-10	16.7393	FBgn0038519	CG5826	Prx5037	Peroxiredoxin 5037	42109	4601 // peroxidase activity // non-traceable author statement /// 8379 // thioredoxin peroxidase activity // inferred from sequence or structural similarity /// 16209 // antioxidant activity // inferred from sequence or structural similarity /// 16209 // antioxidant activity // non-traceable author statement /// 4601 // peroxidase activity // inferred from electronic annotation /// 16209 // antio…	6800 // oxygen and reactive oxygen species metabolism // inferred from electronic annotation /// 6952 // defense response // inferred from electronic annotation /// 45454 // cell redox homeostasis // inferred from sequence or structural similarity /// 45454 // cell redox homeostasis // inferred from sequence similarity	5739 // mitochondrion // inferred from sequence or structural similarity /// 5739 // mitochondrion // inferred from sequence similarity	IPR000866 // Alkyl hydroperoxide reductase/ Thiol specific antioxidant/ Mal allergen // 1.3E-79
6932	148131_at	-0.686336	0.686497	-10.5634	7.17066e-12	2.03069e-10	16.7382	FBgn0035475	CG10866	CG10866	CG10866	38461	---	---	---	---
11257	152456_at	-0.800298	1.83301	-10.5646	7.15172e-12	2.03069e-10	16.7409	FBgn0019643	CG3318	Dat	Dopamine N acetyltransferase	37867	4059 // aralkylamine N-acetyltransferase activity // inferred from direct assay /// 4059 // aralkylamine N-acetyltransferase activity // non-traceable author statement /// 4059 // aralkylamine N-acetyltransferase activity // traceable author statement /// 4060 // arylamine N-acetyltransferase activity // inferred from direct assay /// 8080 // N-acetyltransferase activity // inferred from direct a…	6584 // catecholamine metabolism // inferred from direct assay /// 7610 // behavior // traceable author statement /// 30431 // sleep // traceable author statement /// 42402 // biogenic amine catabolism // non-traceable author statement /// 42420 // dopamine catabolism // non-traceable author statement /// 42429 // serotonin catabolism // non-traceable author statement /// 45187 // regulation of c…	---	IPR000182 // GCN5-related N-acetyltransferase // 1.3E-8 /// IPR000182 // GCN5-related N-acetyltransferase // 1.3E-8
4615	145814_at	-0.932943	2.53726	-10.5217	7.90803e-12	2.2292e-10	16.6389	FBgn0031691	CG14034	CG14034	CG14034	33751	4620 // phospholipase activity // inferred from sequence or structural similarity /// 3824 // catalytic activity // inferred from electronic annotation /// 4620 // phospholipase activity // inferred from sequence similarity	6629 // lipid metabolism // inferred from electronic annotation /// 6644 // phospholipid metabolism // inferred from sequence or structural similarity /// 6644 // phospholipid metabolism // inferred from sequence similarity	---	IPR000734 // Lipase // 4.9E-30
8569	149768_s_at	-0.747185	3.16182	-10.5041	8.24131e-12	2.31384e-10	16.597	FBgn0038037	CG11466	Cyp9f2	Cyp9f2	41520	4497 // monooxygenase activity // inferred from electronic annotation /// 16491 // oxidoreductase activity // inferred from electronic annotation /// 5506 // iron ion binding // inferred from electronic annotation /// 20037 // heme binding // inferred from electronic annotation /// 46872 // metal ion binding // inferred from electronic annotation	6118 // electron transport // inferred from electronic annotation	5792 // microsome // non-traceable author statement /// 16020 // membrane // non-traceable author statement /// 5783 // endoplasmic reticulum // inferred from electronic annotation /// 5792 // microsome // inferred from electronic annotation /// 16020 // membrane // inferred from electronic annotation	IPR001128 // Cytochrome P450 // 1.5E-76 /// IPR001128 // Cytochrome P450 // 1.5E-79
9374	150573_at	-0.79685	1.50108	-10.4779	8.76571e-12	2.45125e-10	16.5344	---	CG11889 /// CG11891	---	---	---	16301 // kinase activity // inferred from electronic annotation /// 16740 // transferase activity // inferred from electronic annotation	---	---	---
1258	142457_at	-0.612125	2.34204	-10.4664	9.00546e-12	2.50828e-10	16.507	FBgn0022344	CG10340	CG10340	CG10340	42020	---	6461 // protein complex assembly // inferred from electronic annotation /// 19538 // protein metabolism // inferred from electronic annotation	5739 // mitochondrion // inferred from electronic annotation	IPR010591 // ATP11 // 1.0E-126 /// IPR010591 // ATP11 // 1.0E-126
5332	146531_at	-0.621092	0.933845	-10.4336	9.72837e-12	2.70426e-10	16.4287	FBgn0032843	CG10730	CG10730	CG10730	35291	---	---	---	IPR004245 // Protein of unknown function DUF229 // 1.0E-126
7788	148987_at	-0.810524	2.06769	-10.4274	9.87328e-12	2.7391e-10	16.4137	FBgn0036778	CG5137	Cyp312a1	Cyp312a1	40005	4497 // monooxygenase activity // inferred from electronic annotation /// 16491 // oxidoreductase activity // inferred from electronic annotation	6118 // electron transport // inferred from electronic annotation /// 8202 // steroid metabolism // inferred from electronic annotation	5792 // microsome // non-traceable author statement /// 16020 // membrane // non-traceable author statement	IPR001128 // Cytochrome P450 // 7.6E-97
5536	146735_at	-0.662477	1.3527	-10.4218	1.0004e-11	2.76989e-10	16.4004	FBgn0033165	CG11113	CG11113	CG11113	35659	---	---	---	---
11283	152482_at	-0.901596	2.37112	-10.4022	1.04777e-11	2.89532e-10	16.3534	FBgn0035484	CG11594	CG11594	CG11594	38473	5515 // protein binding // inferred from physical interaction	5975 // carbohydrate metabolism // inferred from electronic annotation	---	IPR000577 // Carbohydrate kinase, FGGY // 1.6E-11 /// IPR000577 // Carbohydrate kinase, FGGY // 1.6E-11
3038	144237_at	-0.606869	1.53032	-10.3948	1.06622e-11	2.93795e-10	16.3357	FBgn0028561	CG17976	sut3	sugar transporter 3	44268	5351 // sugar porter activity // inferred from sequence or structural similarity /// 5355 // glucose transporter activity // inferred from sequence or structural similarity /// 5215 // transporter activity // inferred from electronic annotation /// 5351 // sugar porter activity // inferred from electronic annotation /// 5351 // sugar porter activity // inferred from sequence similarity /// 5355 /…	5975 // carbohydrate metabolism // inferred from electronic annotation /// 8643 // carbohydrate transport // inferred from electronic annotation /// 6810 // transport // inferred from electronic annotation	16020 // membrane // inferred from electronic annotation /// 16021 // integral to membrane // inferred from electronic annotation	IPR005828 // General substrate transporter // 4.3E-82
8850	150049_at	-0.689018	0.398445	-10.3943	1.06739e-11	2.93795e-10	16.3346	FBgn0051265	CG31265	CG31265	CG31265	42068	4252 // serine-type endopeptidase activity // non-traceable author statement /// 4263 // chymotrypsin activity // inferred from electronic annotation /// 4295 // trypsin activity // inferred from sequence or structural similarity /// 4252 // serine-type endopeptidase activity // inferred from electronic annotation /// 4295 // trypsin activity // inferred from sequence similarity	6508 // proteolysis // non-traceable author statement /// 6508 // proteolysis // inferred from electronic annotation	---	IPR001254 // Peptidase S1, chymotrypsin // 8.1E-66
3810	145009_at	-1.25294	4.98148	-10.3625	1.15086e-11	3.14912e-10	16.2582	FBgn0030487	CG12726	CG12726	CG12726	32302	8061 // chitin binding // inferred from electronic annotation	6030 // chitin metabolism // inferred from electronic annotation	5576 // extracellular region // inferred from electronic annotation	IPR002557 // Chitin binding Peritrophin-A // 2.3E-17
13548	154747_at	-1.05005	1.01013	-10.3578	1.16376e-11	3.1781e-10	16.2469	FBgn0034406	CG15106	Jheh3	Juvenile hormone epoxide hydrolase 3	37182	4301 // epoxide hydrolase activity // inferred from sequence or structural similarity /// 8096 // juvenile hormone epoxide hydrolase activity // non-traceable author statement /// 5515 // protein binding // inferred from physical interaction /// 3824 // catalytic activity // inferred from electronic annotation /// 4301 // epoxide hydrolase activity // inferred from electronic annotation /// 16787…	6719 // juvenile hormone catabolism // non-traceable author statement /// 6952 // defense response // inferred from electronic annotation /// 9636 // response to toxin // inferred from electronic annotation /// 19439 // aromatic compound catabolism // inferred from electronic annotation	5792 // microsome // inferred from sequence or structural similarity /// 5783 // endoplasmic reticulum // inferred from electronic annotation /// 5792 // microsome // inferred from electronic annotation /// 16020 // membrane // inferred from electronic annotation /// 16021 // integral to membrane // inferred from electronic annotation /// 5792 // microsome // inferred from sequence similarity	IPR000073 // Alpha/beta hydrolase fold // 1.2E-12 /// IPR010497 // Epoxide hydrolase, N-terminal // 1.6E-68
6130	147329_at	-0.554474	0.950929	-10.3475	1.19261e-11	3.23808e-10	16.2221	FBgn0034154	CG5267	CG5267	CG5267	36875	---	---	---	IPR002919 // Trypsin inhibitor-like, cysteine-rich TIL region // 6.7E-9
5940	147139_at	-0.816675	3.19209	-10.3465	1.19525e-11	3.23896e-10	16.2198	FBgn0033821	CG10799	CG10799	CG10799	36472	---	---	---	---
4568	145767_at	-0.985974	0.626815	-10.322	1.26699e-11	3.42675e-10	16.1607	---	---	---	---	---	---	---	---	---
9275	150474_at	-1.00002	1.33095	-10.2851	1.38294e-11	3.7188e-10	16.0719	FBgn0039131	CG12268	CG12268	CG12268	42833	16491 // oxidoreductase activity // inferred from electronic annotation /// 5515 // protein binding // inferred from physical interaction	---	---	IPR004262 // Male sterility protein // 3.4E-106
9019	150218_at	-0.589867	0.857682	-10.2573	1.47754e-11	3.95045e-10	16.0047	FBgn0038732	CG11391	CG11391	CG11391	42353	5324 // long-chain fatty acid transporter activity // inferred from sequence or structural similarity /// 16874 // ligase activity // inferred from electronic annotation /// 3824 // catalytic activity // inferred from electronic annotation /// 5324 // long-chain fatty acid transporter activity // inferred from sequence similarity	8152 // metabolism // inferred from electronic annotation	---	IPR000873 // AMP-dependent synthetase and ligase // 2.6E-82
11644	152843_at	-0.848513	1.53647	-10.2552	1.48501e-11	3.96286e-10	15.9996	FBgn0019952	CG6331	Orct	Organic cation transporter	42891	8324 // cation transporter activity // inferred from electronic annotation /// 15101 // organic cation transporter activity // inferred from sequence or structural similarity /// 5515 // protein binding // inferred from physical interaction /// 5215 // transporter activity // inferred from electronic annotation /// 15101 // organic cation transporter activity // inferred from sequence similarity	6812 // cation transport // inferred from electronic annotation /// 6858 // extracellular transport // inferred from electronic annotation /// 6915 // apoptosis // traceable author statement /// 15695 // organic cation transport // inferred from sequence or structural similarity /// 6810 // transport // inferred from electronic annotation /// 6811 // ion transport // inferred from electronic anno…	16021 // integral to membrane // non-traceable author statement /// 16020 // membrane // inferred from electronic annotation /// 16021 // integral to membrane // inferred from electronic annotation	IPR005828 // General substrate transporter // 1.1E-20
1220	142419_at	-1.67949	2.49854	-10.2402	1.53908e-11	4.09155e-10	15.9633	FBgn0030098	CG12057	CG12057	CG12057	31854	---	---	---	---
2214	143413_at	-0.604965	0.905843	-10.2326	1.56706e-11	4.1502e-10	15.9451	FBgn0004003	CG7225	wbl	windbeutel	37206	5515 // protein binding // inferred from physical interaction /// 42803 // protein homodimerization activity // inferred from physical interaction /// 51082 // unfolded protein binding // inferred from electronic annotation	42 // protein targeting to Golgi // inferred from genetic interaction /// 42 // protein targeting to Golgi // traceable author statement /// 6887 // exocytosis // inferred from electronic annotation /// 7313 // maternal determination of dorsal/ventral axis, oocyte, soma encoded // traceable author statement /// 8063 // Toll signaling pathway // traceable author statement /// 9792 // embryonic dev…	5783 // endoplasmic reticulum // traceable author statement /// 5783 // endoplasmic reticulum // inferred from direct assay /// 5783 // endoplasmic reticulum // inferred from electronic annotation	---
7789	148988_at	-0.562181	2.02327	-10.2166	1.62788e-11	4.28695e-10	15.9064	FBgn0020300	CG13695	gk	geko	50263	---	45471 // response to ethanol // non-traceable author statement	---	---
2474	143673_at	-0.88085	4.04552	-10.2	1.69376e-11	4.44375e-10	15.8662	FBgn0011670	CG4986	Mst57Dc	Male-specific RNA 57Dc	43121	---	18991 // oviposition // non-traceable author statement /// 45297 // post-mating behavior // non-traceable author statement /// 7610 // behavior // inferred from electronic annotation	5576 // extracellular region // non-traceable author statement	---
7954	149153_at	-0.554413	0.782895	-10.2	1.69373e-11	4.44375e-10	15.8662	FBgn0052432	CG32432	CG32432	CG32432	40310	5179 // hormone activity // inferred from electronic annotation /// 5515 // protein binding // inferred from physical interaction	---	5576 // extracellular region // inferred from electronic annotation	IPR002172 // Low density lipoprotein-receptor, class A // 6.3E-16 /// IPR000859 // CUB // 3.1E-6 /// IPR000859 // CUB // 7.6E-5
6388	147587_at	-0.629645	0.0365949	-10.1955	1.71227e-11	4.47709e-10	15.8552	FBgn0034563	CG15649	CG15649	CG15649	37371	---	---	---	---
937	142136_at	-0.457067	0.477136	-10.1943	1.71722e-11	4.48013e-10	15.8522	FBgn0031737	CG11142	CG11142	CG11142	33806	8061 // chitin binding // inferred from electronic annotation /// 16490 // structural constituent of peritrophic membrane (sensu Insecta) // inferred from sequence or structural similarity /// 5515 // protein binding // inferred from physical interaction /// 16490 // structural constituent of peritrophic membrane (sensu Insecta) // inferred from sequence similarity	6030 // chitin metabolism // inferred from electronic annotation	5576 // extracellular region // inferred from electronic annotation	IPR002557 // Chitin binding Peritrophin-A // 3.0E-13 /// IPR002557 // Chitin binding Peritrophin-A // 1.6E-13 /// IPR002557 // Chitin binding Peritrophin-A // 3.5E-13
9223	150422_at	-0.526863	0.905131	-10.1896	1.73661e-11	4.5223e-10	15.8408	FBgn0039050	CG17110	CG17110	CG17110	42729	4046 // aminoacylase activity // non-traceable author statement /// 8237 // metallopeptidase activity // inferred from electronic annotation /// 5515 // protein binding // inferred from physical interaction /// 4046 // aminoacylase activity // inferred from electronic annotation /// 16787 // hydrolase activity // inferred from electronic annotation /// 46983 // protein dimerization activity // in…	6508 // proteolysis // inferred from electronic annotation /// 6520 // amino acid metabolism // inferred from electronic annotation	5737 // cytoplasm // inferred from electronic annotation	IPR002933 // Peptidase M20 // 4.7E-92
10728	151927_at	-1.13368	2.54709	-10.1751	1.79755e-11	4.63915e-10	15.8059	FBgn0036619	CG4784	CG4784	CG4784	39816	42302 // structural constituent of cuticle // inferred from electronic annotation	---	---	IPR000618 // Insect cuticle protein // 2.2E-7
2140	143339_i_at	-1.40294	6.23047	-10.1693	1.82279e-11	4.69436e-10	15.7917	FBgn0003357	CG31362	Jon99Ciii	Jonah 99Ciii	43543	4252 // serine-type endopeptidase activity // inferred from sequence or structural similarity /// 4252 // serine-type endopeptidase activity // non-traceable author statement /// 4263 // chymotrypsin activity // non-traceable author statement /// 4295 // trypsin activity // inferred from electronic annotation /// 8236 // serine-type peptidase activity // non-traceable author statement /// 4252 //…	6508 // proteolysis // non-traceable author statement /// 7586 // digestion // non-traceable author statement /// 6508 // proteolysis // inferred from electronic annotation	---	IPR001254 // Peptidase S1, chymotrypsin // 1.1E-57
10712	151911_at	-0.455681	0.755058	-10.1646	1.84332e-11	4.73851e-10	15.7804	FBgn0029843	CG5905	Nep1	Neprilysin 1	31547	4222 // metalloendopeptidase activity // inferred from sequence or structural similarity /// 4245 // neprilysin activity // inferred from electronic annotation /// 5529 // sugar binding // inferred from electronic annotation /// 8237 // metallopeptidase activity // inferred from sequence or structural similarity /// 8270 // zinc ion binding // inferred from electronic annotation /// 8233 // pepti…	6508 // proteolysis // inferred from electronic annotation /// 7165 // signal transduction // inferred from electronic annotation	16020 // membrane // inferred from electronic annotation	IPR008753 // Peptidase M13 // 1.3E-107 /// IPR000718 // Peptidase M13, neprilysin // 6.6E-83
3111	144310_at	-1.61428	2.9726	-10.1385	1.96233e-11	5.02601e-10	15.7169	FBgn0028920	CG8997	CG8997	CG8997	34799	---	---	---	IPR004272 // Odorant binding protein // 4.9E-35
8968	150167_at	-0.726784	1.68898	-10.1322	1.99207e-11	5.08358e-10	15.7016	---	---	---	---	---	---	---	---	---
11028	152227_at	-0.719124	2.77106	-10.1323	1.99198e-11	5.08358e-10	15.7017	FBgn0038407	CG6126	CG6126	CG6126	41967	15101 // organic cation transporter activity // inferred from sequence or structural similarity /// 15144 // carbohydrate transporter activity // inferred from electronic annotation /// 5515 // protein binding // inferred from physical interaction /// 5215 // transporter activity // inferred from electronic annotation /// 15101 // organic cation transporter activity // inferred from sequence simi…	5975 // carbohydrate metabolism // inferred from electronic annotation /// 6812 // cation transport // inferred from electronic annotation /// 6858 // extracellular transport // inferred from electronic annotation /// 8643 // carbohydrate transport // inferred from electronic annotation /// 6810 // transport // inferred from electronic annotation	16020 // membrane // inferred from electronic annotation /// 16021 // integral to membrane // inferred from electronic annotation	IPR005828 // General substrate transporter // 1.0E-15
9297	150496_at	-0.634872	2.53042	-10.1182	2.06011e-11	5.22864e-10	15.6676	FBgn0039172	CG5677	CG5677	CG5677	42885	9003 // signal peptidase activity // inferred from sequence or structural similarity /// 9003 // signal peptidase activity // non-traceable author statement /// 8233 // peptidase activity // inferred from electronic annotation /// 9003 // signal peptidase activity // inferred from electronic annotation /// 16787 // hydrolase activity // inferred from electronic annotation /// 9003 // signal pepti…	6465 // signal peptide processing // inferred from sequence or structural similarity /// 6465 // signal peptide processing // non-traceable author statement /// 6508 // proteolysis // inferred from electronic annotation /// 6465 // signal peptide processing // inferred from electronic annotation /// 6465 // signal peptide processing // inferred from sequence similarity	5787 // signal peptidase complex // inferred from sequence or structural similarity /// 5787 // signal peptidase complex // non-traceable author statement /// 16021 // integral to membrane // inferred from electronic annotation /// 5783 // endoplasmic reticulum // inferred from electronic annotation /// 5787 // signal peptidase complex // inferred from electronic annotation /// 5792 // microsome …	IPR007653 // Signal peptidase 22 kDa subunit // 5.2E-115
10903	152102_at	-0.945348	2.29526	-10.1169	2.06679e-11	5.23611e-10	15.6643	FBgn0035189	CG9119	CG9119	CG9119	38124	---	---	---	---
9213	150412_at	-0.932179	1.68184	-10.1043	2.13037e-11	5.38746e-10	15.6335	FBgn0039040	CG13833	CG13833	CG13833	42718	16491 // oxidoreductase activity // inferred from sequence or structural similarity /// 16491 // oxidoreductase activity // inferred from electronic annotation /// 16491 // oxidoreductase activity // inferred from sequence similarity	7601 // visual perception // inferred from electronic annotation /// 8152 // metabolism // inferred from electronic annotation	---	IPR002198 // Short-chain dehydrogenase/reductase SDR // 1.1E-44
3373	144572_at	-0.863847	1.6928	-10.0838	2.23781e-11	5.64895e-10	15.5836	FBgn0029838	CG4666	CG4666	CG4666	31541	---	---	---	---
995	142194_at	-0.563745	2.24681	-10.065	2.34132e-11	5.89962e-10	15.5378	FBgn0031813	CG9527	CG9527	CG9527	33898	16402 // pristanoyl-CoA oxidase activity // non-traceable author statement /// 3995 // acyl-CoA dehydrogenase activity // inferred from electronic annotation /// 3997 // acyl-CoA oxidase activity // inferred from electronic annotation /// 16491 // oxidoreductase activity // inferred from electronic annotation /// 50660 // FAD binding // inferred from electronic annotation	6118 // electron transport // inferred from electronic annotation /// 6635 // fatty acid beta-oxidation // inferred from electronic annotation /// 6631 // fatty acid metabolism // inferred from electronic annotation	5777 // peroxisome // inferred from electronic annotation	IPR002655 // Acyl-CoA oxidase // 5.0E-24 /// IPR006090 // Acyl-CoA dehydrogenase, C-terminal // 5.8E-5
5370	146569_at	-1.25882	2.37369	-10.0566	2.38925e-11	5.99882e-10	15.5172	FBgn0032913	CG9259	CG9259	CG9259	35372	16301 // kinase activity // inferred from electronic annotation /// 16740 // transferase activity // inferred from electronic annotation	---	---	IPR004119 // Protein of unknown function DUF227 // 1.0E-85
6137	147336_at	-1.00623	2.84244	-10.0524	2.41364e-11	6.02764e-10	15.5069	FBgn0034162	CG6426	CG6426	CG6426	36891	5509 // calcium ion binding // inferred from electronic annotation	6952 // defense response // inferred from electronic annotation /// 42742 // defense response to bacteria // inferred from electronic annotation	---	IPR008597 // Destabilase // 1.3E-72
9702	150901_at	-0.769793	1.03859	-10.041	2.48062e-11	6.18388e-10	15.4792	FBgn0039787	CG9702	CG9702	CG9702	43634	5215 // transporter activity // non-traceable author statement /// 15381 // high affinity sulfate permease activity // inferred from sequence or structural similarity /// 5215 // transporter activity // inferred from electronic annotation /// 15381 // high affinity sulfate permease activity // inferred from sequence similarity	6790 // sulfur metabolism // inferred from electronic annotation /// 6820 // anion transport // inferred from electronic annotation /// 6858 // extracellular transport // inferred from electronic annotation /// 6810 // transport // inferred from electronic annotation	16021 // integral to membrane // inferred from electronic annotation	IPR001902 // Sulphate transporter // 2.5E-14 /// IPR001902 // Sulphate transporter // 3.8E-37
5421	146620_s_at	-0.790312	3.937	-10.034	2.52258e-11	6.27731e-10	15.4621	FBgn0025814 /// FBgn0035793	CG1742	Mgstl /// CG7546	Microsomal glutathione S-transferase-like /// CG7546	38844 /// 44110	4364 // glutathione transferase activity // inferred from sequence or structural similarity /// 16740 // transferase activity // inferred from electronic annotation /// 4364 // glutathione transferase activity // inferred from sequence similarity	6464 // protein modification // inferred from electronic annotation /// 6952 // defense response // inferred from electronic annotation /// 9636 // response to toxin // inferred from electronic annotation	5741 // mitochondrial outer membrane // inferred from sequence or structural similarity /// 5792 // microsome // inferred from sequence or structural similarity /// 5741 // mitochondrial outer membrane // inferred from sequence similarity /// 5792 // microsome // inferred from sequence similarity	IPR001129 // Membrane-associated proteins in eicosanoid and glutathione metabolism (MAPEG) // 1.3E-66 /// IPR001129 // Membrane-associated proteins in eicosanoid and glutathione metabolism (MAPEG) // 1.7E-52
11305	152504_at	-0.789641	3.51048	-10.0251	2.57763e-11	6.40294e-10	15.4402	FBgn0014869	CG1721	Pglym78	Phosphoglyceromutase	43447	4619 // phosphoglycerate mutase activity // inferred from sequence or structural similarity /// 4619 // phosphoglycerate mutase activity // non-traceable author statement /// 3824 // catalytic activity // inferred from electronic annotation /// 16868 // intramolecular transferase activity, phosphotransferases // inferred from electronic annotation /// 4619 // phosphoglycerate mutase activity // i…	6096 // glycolysis // inferred from electronic annotation /// 8152 // metabolism // inferred from electronic annotation	---	IPR001345 // Phosphoglycerate/bisphosphoglycerate mutase // 3.4E-119
7365	148564_at	-0.615033	1.41475	-10.0135	2.65067e-11	6.57273e-10	15.4119	FBgn0036145	CG7607	CG7607	CG7607	39263	---	7275 // development // inferred from electronic annotation	---	IPR007110 // Immunoglobulin-like // 1.6E-6
1692	142891_at	-0.462973	0.823076	-9.99744	2.75539e-11	6.82033e-10	15.3726	FBgn0031097	CG17052	CG17052	CG17052	33022	8061 // chitin binding // inferred from electronic annotation /// 16490 // structural constituent of peritrophic membrane (sensu Insecta) // inferred from sequence or structural similarity /// 16490 // structural constituent of peritrophic membrane (sensu Insecta) // inferred from sequence similarity	6030 // chitin metabolism // inferred from electronic annotation	5576 // extracellular region // inferred from electronic annotation	IPR002557 // Chitin binding Peritrophin-A // 7.6E-17 /// IPR002557 // Chitin binding Peritrophin-A // 4.0E-17 /// IPR002557 // Chitin binding Peritrophin-A // 2.7E-13
10534	151733_at	-0.652469	2.05729	-9.99211	2.79105e-11	6.8964e-10	15.3596	FBgn0010497	CG5304	l(2)01810	lethal (2) 01810	47253	5316 // high affinity inorganic phosphate:sodium symporter activity // inferred from sequence or structural similarity /// 5215 // transporter activity // inferred from electronic annotation /// 5316 // high affinity inorganic phosphate:sodium symporter activity // inferred from sequence similarity	5975 // carbohydrate metabolism // inferred from electronic annotation /// 6796 // phosphate metabolism // inferred from electronic annotation /// 6812 // cation transport // inferred from electronic annotation /// 6817 // phosphate transport // inferred from electronic annotation /// 6858 // extracellular transport // inferred from electronic annotation /// 6810 // transport // inferred from ele…	16021 // integral to membrane // inferred from electronic annotation /// 16020 // membrane // inferred from electronic annotation	---
11063	152262_at	-0.459746	1.33963	-9.97262	2.92567e-11	7.21632e-10	15.3118	FBgn0051547	CG31547	CG31547	CG31547	40663	5279 // amino acid-polyamine transporter activity // inferred from electronic annotation /// 8324 // cation transporter activity // inferred from electronic annotation /// 8511 // sodium:potassium:chloride symporter activity // inferred from sequence or structural similarity /// 5515 // protein binding // inferred from physical interaction /// 5215 // transporter activity // inferred from electro…	6810 // transport // inferred from sequence or structural similarity /// 6812 // cation transport // inferred from electronic annotation /// 6814 // sodium ion transport // inferred from electronic annotation /// 6821 // chloride transport // inferred from electronic annotation /// 6865 // amino acid transport // inferred from electronic annotation /// 6810 // transport // inferred from electroni…	16020 // membrane // inferred from electronic annotation /// 16021 // integral to membrane // inferred from electronic annotation	IPR004841 // Amino acid permease-associated region // 1.5E-103 /// IPR004841 // Amino acid permease-associated region // 1.5E-103
9584	150783_at	-0.574521	1.6404	-9.96736	2.96318e-11	7.29599e-10	15.2989	FBgn0039597	CG9997	CG9997	CG9997	43395	---	---	---	---
11686	152885_at	-0.724841	1.39038	-9.94376	3.13733e-11	7.69771e-10	15.2409	FBgn0038919	CG17843	CG17843	CG17843	42583	15926 // glucosidase activity // inferred from electronic annotation /// 16491 // oxidoreductase activity // inferred from sequence or structural similarity /// 16971 // flavin-linked sulfhydryl oxidase activity // inferred from sequence or structural similarity /// 16491 // oxidoreductase activity // inferred from sequence similarity /// 16971 // flavin-linked sulfhydryl oxidase activity // infe…	6118 // electron transport // inferred from electronic annotation	---	IPR006863 // Erv1/Alr // 4.2E-50
3409	144608_at	-0.690872	3.20471	-9.89747	3.51008e-11	8.56728e-10	15.1271	FBgn0029888	CG3192	CG3192	CG3192	31604	3954 // NADH dehydrogenase activity // inferred from sequence or structural similarity /// 8137 // NADH dehydrogenase (ubiquinone) activity // inferred from sequence or structural similarity /// 3954 // NADH dehydrogenase activity // inferred from sequence similarity /// 8137 // NADH dehydrogenase (ubiquinone) activity // inferred from sequence similarity	6120 // mitochondrial electron transport, NADH to ubiquinone // inferred from sequence or structural similarity /// 6120 // mitochondrial electron transport, NADH to ubiquinone // inferred from sequence similarity	5747 // respiratory chain complex I (sensu Eukaryota) // inferred from sequence or structural similarity /// 5747 // respiratory chain complex I (sensu Eukaryota) // inferred from sequence similarity	IPR008699 // NADH-ubiquinone oxidoreductase ASHI subunit // 4.1E-24
3979	145178_at	-1.4556	3.26223	-9.8881	3.59087e-11	8.73405e-10	15.104	FBgn0030737	CG9914	CG9914	CG9914	32592	5198 // structural molecule activity // inferred from electronic annotation /// 16491 // oxidoreductase activity // inferred from electronic annotation	6629 // lipid metabolism // inferred from electronic annotation /// 6631 // fatty acid metabolism // inferred from electronic annotation /// 7010 // cytoskeleton organization and biogenesis // inferred from electronic annotation	---	IPR006108 // 3-hydroxyacyl-CoA dehydrogenase, C-terminal // 1.4E-25 /// IPR006176 // 3-hydroxyacyl-CoA dehydrogenase, NAD binding domain // 2.0E-49
348	141547_at	-0.717338	1.48321	-9.87946	3.66704e-11	8.88845e-10	15.0827	FBgn0004057	CG12529	Zw	Zwischenferment	32974	4345 // glucose-6-phosphate 1-dehydrogenase activity // inferred from sequence or structural similarity /// 4345 // glucose-6-phosphate 1-dehydrogenase activity // traceable author statement /// 5515 // protein binding // inferred from physical interaction /// 4345 // glucose-6-phosphate 1-dehydrogenase activity // inferred from electronic annotation /// 16491 // oxidoreductase activity // inferr…	6098 // pentose-phosphate shunt // non-traceable author statement /// 5975 // carbohydrate metabolism // inferred from electronic annotation /// 6006 // glucose metabolism // inferred from electronic annotation	---	IPR001282 // Glucose-6-phosphate dehydrogenase // 1.0E-126 /// IPR001282 // Glucose-6-phosphate dehydrogenase // 1.0E-126 /// IPR001282 // Glucose-6-phosphate dehydrogenase // 1.0E-126 /// IPR001282 // Glucose-6-phosphate dehydrogenase // 1.0E-126
10797	151996_at	-0.761116	2.8139	-9.85755	3.86777e-11	9.34268e-10	15.0286	FBgn0034797	CG12781	nahoda	nahoda	37641	4500 // dopamine beta-monooxygenase activity // inferred from electronic annotation	6584 // catecholamine metabolism // inferred from electronic annotation /// 6548 // histidine catabolism // inferred from electronic annotation	---	IPR005018 // DOMON domain // 5.1E-33 /// IPR005018 // DOMON domain // 1.3E-42
2950	144149_at	-0.596929	0.265288	-9.85274	3.9133e-11	9.43638e-10	15.0168	FBgn0026602	CG1851	Ady43A	Ady43A	44750	4001 // adenosine kinase activity // inferred from sequence or structural similarity /// 4001 // adenosine kinase activity // non-traceable author statement /// 19201 // nucleotide kinase activity // inferred from electronic annotation /// 5515 // protein binding // inferred from physical interaction /// 4001 // adenosine kinase activity // inferred from electronic annotation /// 4001 // adenosin…	6139 // nucleobase, nucleoside, nucleotide and nucleic acid metabolism // inferred from electronic annotation /// 6166 // purine ribonucleoside salvage // inferred from electronic annotation	---	IPR002173 // Carbohydrate kinase, PfkB // 8.2E-45
5453	146652_at	-0.565011	2.7197	-9.83019	4.13418e-11	9.90083e-10	14.9611	FBgn0033035	CG17337	CG17337	CG17337	35507	5515 // protein binding // inferred from physical interaction /// 8237 // metallopeptidase activity // inferred from electronic annotation /// 16787 // hydrolase activity // inferred from electronic annotation /// 46983 // protein dimerization activity // inferred from electronic annotation	6508 // proteolysis // inferred from electronic annotation	---	IPR002933 // Peptidase M20 // 6.3E-67
8384	149583_at	-0.55286	1.28946	-9.82799	4.15642e-11	9.9371e-10	14.9557	FBgn0037749	CG9471	CG9471	CG9471	41197	3959 // NADPH dehydrogenase activity // inferred from sequence or structural similarity /// 4074 // biliverdin reductase activity // inferred from sequence or structural similarity /// 3824 // catalytic activity // inferred from electronic annotation /// 51287 // NAD binding // inferred from electronic annotation /// 3959 // NADPH dehydrogenase activity // inferred from sequence similarity /// 40…	6118 // electron transport // inferred from electronic annotation /// 6732 // coenzyme metabolism // inferred from electronic annotation /// 9225 // nucleotide-sugar metabolism // inferred from electronic annotation	---	---
10636	151835_at	-0.631428	0.983748	-9.82631	4.17344e-11	9.9608e-10	14.9515	FBgn0035734	CG14823	CG14823	CG14823	38772	---	---	---	IPR008597 // Destabilase // 1.4E-71
11631	152830_at	-0.79037	0.711298	-9.80468	4.39955e-11	1.04471e-09	14.898	FBgn0035154	CG3344	CG3344	CG3344	38083	4185 // serine carboxypeptidase activity // inferred from sequence or structural similarity /// 3824 // catalytic activity // inferred from electronic annotation /// 4185 // serine carboxypeptidase activity // inferred from electronic annotation /// 4185 // serine carboxypeptidase activity // inferred from sequence similarity	6508 // proteolysis // inferred from electronic annotation	---	IPR001563 // Peptidase S10, serine carboxypeptidase // 5.9E-83
10652	151851_at	-0.896047	2.74052	-9.80014	4.44856e-11	1.05456e-09	14.8868	FBgn0027611	CG6206	CG6206	CG6206	34437	4559 // alpha-mannosidase activity // inferred from sequence or structural similarity /// 16799 // hydrolase activity, hydrolyzing N-glycosyl compounds // inferred from electronic annotation /// 5515 // protein binding // inferred from physical interaction /// 4559 // alpha-mannosidase activity // inferred from electronic annotation /// 15923 // mannosidase activity // inferred from electronic an…	5975 // carbohydrate metabolism // inferred from electronic annotation /// 6013 // mannose metabolism // inferred from electronic annotation	5764 // lysosome // inferred from sequence or structural similarity /// 5764 // lysosome // inferred from sequence similarity	IPR000602 // Glycoside hydrolase, family 38 // 1.0E-126
499	141698_at	-0.715611	1.95401	-9.79584	4.49551e-11	1.06389e-09	14.8761	FBgn0031260	CG11840	Spp	Signal peptide protease	33227	8717 // D-alanyl-D-alanine endopeptidase activity // inferred from electronic annotation /// 42499 // signal peptide peptidase activity // inferred from direct assay /// 42499 // signal peptide peptidase activity // non-traceable author statement	6355 // regulation of transcription, DNA-dependent // inferred from electronic annotation /// 7424 // tracheal system development (sensu Insecta) // inferred from mutant phenotype	5783 // endoplasmic reticulum // inferred from direct assay /// 16021 // integral to membrane // inferred from electronic annotation	IPR007369 // Peptidase A22B, minor histocompatibility antigen H13 // 1.0E-126
1209	142408_at	-0.643885	2.08077	-9.7604	4.90221e-11	1.15818e-09	14.7883	FBgn0036623	CG4729	CG4729	CG4729	39820	3841 // 1-acylglycerol-3-phosphate O-acyltransferase activity // inferred from sequence or structural similarity /// 5515 // protein binding // inferred from physical interaction /// 8415 // acyltransferase activity // inferred from electronic annotation /// 3841 // 1-acylglycerol-3-phosphate O-acyltransferase activity // inferred from sequence similarity	8152 // metabolism // inferred from electronic annotation	---	IPR002123 // Phospholipid/glycerol acyltransferase // 8.1E-7
9638	150837_at	-1.60578	1.20653	-9.75732	4.93921e-11	1.16496e-09	14.7807	FBgn0039685	CG7592	Obp99b	Odorant-binding protein 99b	43497	5549 // odorant binding // inferred from electronic annotation /// 5549 // odorant binding // inferred from sequence or structural similarity /// 5549 // odorant binding // non-traceable author statement /// 5549 // odorant binding // inferred from sequence similarity	6810 // transport // inferred from electronic annotation /// 7606 // sensory perception of chemical stimulus // inferred from sequence or structural similarity /// 19236 // response to pheromone // inferred from sequence or structural similarity /// 35071 // salivary gland cell autophagic cell death // inferred from expression pattern /// 42048 // olfactory behavior // inferred from sequence or s…	5576 // extracellular region // inferred from sequence or structural similarity /// 5576 // extracellular region // inferred from sequence similarity	IPR006170 // Pheromone/general odorant binding protein, PBP/GOBP // 5.8E-31
11176	152375_at	-0.652794	3.94338	-9.75389	4.98087e-11	1.17281e-09	14.7721	FBgn0024211	CG3359	mfas	midline fasciclin	41455	---	7165 // signal transduction // inferred from electronic annotation /// 7398 // ectoderm development // inferred from electronic annotation /// 7409 // axonogenesis // inferred from mutant phenotype /// 16337 // cell-cell adhesion // inferred from electronic annotation /// 7155 // cell adhesion // inferred from electronic annotation	5886 // plasma membrane // non-traceable author statement	IPR000782 // Beta-Ig-H3/fasciclin // 8.4E-16 /// IPR000782 // Beta-Ig-H3/fasciclin // 3.4E-60 /// IPR000782 // Beta-Ig-H3/fasciclin // 8.4E-16 /// IPR000782 // Beta-Ig-H3/fasciclin // 3.4E-60 /// IPR000782 // Beta-Ig-H3/fasciclin // 8.4E-16 /// IPR000782 // Beta-Ig-H3/fasciclin // 3.4E-60 /// IPR000782 // Beta-Ig-H3/fasciclin // 8.4E-16 /// IPR000782 // Beta-Ig-H3/fasciclin // 3.4E-60 /// IPR0007…
12220	153419_at	-0.556113	1.06804	-9.7276	5.31203e-11	1.24659e-09	14.7069	FBgn0011603	CG15444	ine	inebriated	33659	5328 // neurotransmitter:sodium symporter activity // inferred from sequence or structural similarity /// 5328 // neurotransmitter:sodium symporter activity // non-traceable author statement /// 5328 // neurotransmitter:sodium symporter activity // inferred from electronic annotation /// 15293 // symporter activity // inferred from electronic annotation /// 5328 // neurotransmitter:sodium symport…	6811 // ion transport // inferred from electronic annotation /// 6836 // neurotransmitter transport // inferred from electronic annotation /// 6858 // extracellular transport // inferred from electronic annotation /// 6810 // transport // inferred from electronic annotation	5886 // plasma membrane // inferred from sequence or structural similarity /// 5887 // integral to plasma membrane // inferred from electronic annotation /// 16020 // membrane // inferred from electronic annotation /// 16021 // integral to membrane // inferred from electronic annotation /// 5886 // plasma membrane // inferred from sequence similarity	IPR000175 // Sodium:neurotransmitter symporter // 1.0E-126 /// IPR000175 // Sodium:neurotransmitter symporter // 1.0E-126
43	141242_at	-0.830583	1.27341	-9.7186	5.43051e-11	1.26591e-09	14.6845	FBgn0034388 /// FBgn0054020	CG15092	CG15092 /// CG34020	CG15092 /// CG34020	37164 /// 3885593	5515 // protein binding // inferred from physical interaction	---	---	---
4133	145332_at	-1.21363	1.75894	-9.71909	5.42404e-11	1.26591e-09	14.6857	FBgn0030968	CG7322	CG7322	CG7322	32880	16614 // oxidoreductase activity, acting on CH-OH group of donors // inferred from sequence or structural similarity /// 16491 // oxidoreductase activity // inferred from electronic annotation /// 16614 // oxidoreductase activity, acting on CH-OH group of donors // inferred from sequence similarity	6629 // lipid metabolism // inferred from electronic annotation /// 8152 // metabolism // inferred from electronic annotation	---	IPR002198 // Short-chain dehydrogenase/reductase SDR // 2.6E-71
10968	152167_at	-1.0371	3.32036	-9.71717	5.44963e-11	1.26826e-09	14.6809	FBgn0034871	CG3906	CG3906	CG3906	37721	---	---	---	---
11397	152596_at	-0.392202	0.185426	-9.69867	5.70263e-11	1.31838e-09	14.6349	FBgn0031808	CG9507	CG9507	CG9507	33892	4222 // metalloendopeptidase activity // inferred from sequence or structural similarity /// 4245 // neprilysin activity // inferred from electronic annotation /// 8270 // zinc ion binding // inferred from electronic annotation /// 8237 // metallopeptidase activity // inferred from electronic annotation /// 8233 // peptidase activity // inferred from electronic annotation /// 16787 // hydrolase a…	6508 // proteolysis // inferred from electronic annotation	16020 // membrane // inferred from electronic annotation	IPR000718 // Peptidase M13, neprilysin // 1.2E-5 /// IPR000718 // Peptidase M13, neprilysin // 1.9E-13 /// IPR008753 // Peptidase M13 // 7.1E-7
266	141465_at	-0.703077	1.79992	-9.63311	6.69994e-11	1.52628e-09	14.4715	FBgn0032785	CG10026	CG10026	CG10026	35226	5386 // carrier activity // inferred from electronic annotation /// 8431 // vitamin E binding // inferred from sequence or structural similarity /// 16918 // retinal binding // inferred from sequence or structural similarity /// 5215 // transporter activity // inferred from electronic annotation /// 8431 // vitamin E binding // inferred from sequence similarity /// 16918 // retinal binding // inf…	6732 // coenzyme metabolism // inferred from electronic annotation /// 6810 // transport // inferred from electronic annotation /// 51189 // prosthetic group metabolism // inferred from electronic annotation	5622 // intracellular // inferred from electronic annotation	IPR001251 // Cellular retinaldehyde-binding)/triple function, C-terminal // 5.9E-26 /// IPR001251 // Cellular retinaldehyde-binding)/triple function, C-terminal // 5.9E-26
10323	151522_at	-0.805372	4.07326	-9.62731	6.79633e-11	1.54572e-09	14.457	FBgn0029155	CG5889	Mdh	Mdh	43936	4473 // malate dehydrogenase (oxaloacetate-decarboxylating) (NADP+) activity // inferred from sequence or structural similarity /// 4473 // malate dehydrogenase (oxaloacetate-decarboxylating) (NADP+) activity // non-traceable author statement /// 16831 // carboxy-lyase activity // inferred from electronic annotation /// 5515 // protein binding // inferred from physical interaction /// 4470 // mal…	6090 // pyruvate metabolism // inferred from sequence or structural similarity /// 6099 // tricarboxylic acid cycle // inferred from electronic annotation /// 6108 // malate metabolism // inferred from sequence or structural similarity /// 6108 // malate metabolism // inferred from electronic annotation /// 6090 // pyruvate metabolism // inferred from sequence similarity /// 6108 // malate metabo…	5739 // mitochondrion // inferred from sequence or structural similarity /// 5739 // mitochondrion // inferred from sequence similarity	IPR001891 // Malic oxidoreductase // 1.0E-126 /// IPR001891 // Malic oxidoreductase // 1.0E-126
9138	150337_at	-0.600836	1.27732	-9.62508	6.83383e-11	1.55173e-09	14.4514	FBgn0038916	CG6560	CG6560	CG6560	42580	3924 // GTPase activity // inferred from sequence or structural similarity /// 5525 // GTP binding // inferred from electronic annotation /// 166 // nucleotide binding // inferred from electronic annotation /// 3924 // GTPase activity // inferred from sequence similarity	6886 // intracellular protein transport // inferred from electronic annotation /// 7166 // cell surface receptor linked signal transduction // inferred from electronic annotation /// 7264 // small GTPase mediated signal transduction // inferred from electronic annotation /// 17157 // regulation of exocytosis // inferred from electronic annotation /// 6364 // rRNA processing // inferred from elect…	5622 // intracellular // inferred from electronic annotation	IPR006689 // ARF/SAR superfamily // 2.1E-101
933	142132_at	-0.664269	2.20764	-9.60412	7.19613e-11	1.62347e-09	14.399	FBgn0034716	CG3380	Oatp58Dc	Organic anion transporting polypeptide 58Dc	37545	8514 // organic anion transporter activity // inferred from sequence or structural similarity /// 15347 // sodium-independent organic anion transporter activity // inferred from sequence or structural similarity /// 5215 // transporter activity // inferred from electronic annotation /// 8514 // organic anion transporter activity // inferred from sequence similarity /// 15347 // sodium-independent…	15711 // organic anion transport // inferred from sequence or structural similarity /// 6810 // transport // inferred from electronic annotation /// 15711 // organic anion transport // inferred from sequence similarity	16021 // integral to membrane // inferred from sequence or structural similarity /// 16020 // membrane // inferred from electronic annotation /// 16021 // integral to membrane // inferred from sequence similarity	IPR004157 // Organic anion transporter polypeptide (OATP), C-terminal // 1.0E-126
6859	148058_at	-0.639179	0.817222	-9.59802	7.3053e-11	1.64545e-09	14.3838	FBgn0035360	CG1246	CG1246	CG1246	38330	5515 // protein binding // inferred from physical interaction	---	---	---
5329	146528_at	-0.795241	1.56542	-9.59263	7.40313e-11	1.66481e-09	14.3703	FBgn0032839	CG10659	CG10659	CG10659	35285	---	---	---	---
5461	146660_at	-0.791596	1.591	-9.56649	7.89679e-11	1.76935e-09	14.3048	FBgn0033047	CG7882	CG7882	CG7882	35520	5351 // sugar porter activity // inferred from electronic annotation /// 5355 // glucose transporter activity // inferred from sequence or structural similarity /// 5355 // glucose transporter activity // inferred from sequence similarity	5975 // carbohydrate metabolism // inferred from electronic annotation /// 8643 // carbohydrate transport // inferred from electronic annotation	16020 // membrane // inferred from electronic annotation /// 16021 // integral to membrane // inferred from electronic annotation	IPR005828 // General substrate transporter // 4.0E-83 /// IPR005828 // General substrate transporter // 4.0E-83
1214	142413_at	-1.21819	3.58022	-9.54203	8.38917e-11	1.86856e-09	14.2435	FBgn0039800	CG11314	CG11314	CG11314	43648	---	7498 // mesoderm development // inferred from expression pattern	---	IPR003172 // E1 protein and Def2/Der2 allergen // 4.2E-46 /// IPR003172 // E1 protein and Def2/Der2 allergen // 4.2E-46
12976	154175_at	-0.717981	2.35312	-9.53438	8.54958e-11	1.89825e-09	14.2243	FBgn0038463	CG3534	CG3534	CG3534	42047	4856 // xylulokinase activity // inferred from sequence or structural similarity /// 4856 // xylulokinase activity // inferred from sequence similarity	5975 // carbohydrate metabolism // inferred from electronic annotation	---	IPR000577 // Carbohydrate kinase, FGGY // 3.7E-5
6128	147327_at	-0.945929	5.09981	-9.52628	8.7227e-11	1.93362e-09	14.204	FBgn0034152	CG8626	Acp53C14a	Acp53C14a	36872	---	---	---	IPR009392 // Drosophila ACP53EA // 3.2E-11
9922	151121_at	-0.591951	2.21282	-9.50638	9.16367e-11	2.02497e-09	14.154	FBgn0040636	CG13255	CG13255	CG13255	50109	---	---	---	---
8242	149441_at	-0.642436	1.22159	-9.50564	9.18062e-11	2.02552e-09	14.1521	FBgn0037498	CG10029	CG10029	CG10029	40883	3756 // protein disulfide isomerase activity // inferred from sequence or structural similarity /// 3756 // protein disulfide isomerase activity // inferred from sequence similarity	6118 // electron transport // inferred from electronic annotation	---	IPR006662 // Thioredoxin type domain // 1.4E-17
10977	152176_at	-1.52635	5.09252	-9.49542	9.41629e-11	2.07425e-09	14.1264	FBgn0040060	CG6457	yip7	yippee interacting protein 7	38680	4252 // serine-type endopeptidase activity // inferred from sequence or structural similarity /// 4263 // chymotrypsin activity // non-traceable author statement /// 4295 // trypsin activity // inferred from electronic annotation /// 4252 // serine-type endopeptidase activity // inferred from electronic annotation /// 8233 // peptidase activity // inferred from electronic annotation /// 16787 // …	6508 // proteolysis // non-traceable author statement /// 6508 // proteolysis // inferred from electronic annotation	---	IPR001254 // Peptidase S1, chymotrypsin // 1.4E-69
12152	153351_at	-0.57834	3.30875	-9.4486	1.05776e-10	2.3264e-09	14.0085	FBgn0033906	CG8331	CG8331	CG8331	36569	5083 // small GTPase regulator activity // inferred from electronic annotation	8283 // cell proliferation // inferred from electronic annotation	---	IPR004345 // TB2/DP1 and HVA22 related protein // 9.0E-60 /// IPR004345 // TB2/DP1 and HVA22 related protein // 6.7E-60
932	142131_at	-0.498208	1.39308	-9.44387	1.07026e-10	2.3499e-09	13.9966	FBgn0034715	CG3382	Oatp58Db	Organic anion transporting polypeptide 58Db	37544	8514 // organic anion transporter activity // inferred from sequence or structural similarity /// 8514 // organic anion transporter activity // inferred from sequence similarity	6364 // rRNA processing // inferred from electronic annotation /// 6820 // anion transport // inferred from electronic annotation /// 15711 // organic anion transport // inferred from sequence or structural similarity /// 15711 // organic anion transport // inferred from sequence similarity	16020 // membrane // inferred from electronic annotation	IPR004157 // Organic anion transporter polypeptide (OATP), C-terminal // 1.0E-126
4253	145452_at	-0.513829	0.800851	-9.44329	1.0718e-10	2.3499e-09	13.9951	FBgn0031146	CG15449	CG15449	CG15449	33079	---	---	---	---
7678	148877_at	-1.03919	3.70979	-9.43533	1.09326e-10	2.39321e-09	13.975	FBgn0042201 /// FBgn0068114	CG13061	Nplp3 /// DyakNplp3	Neuropeptide-like precursor 3 /// Nplp3	59235	5184 // neuropeptide hormone activity // non-traceable author statement	7218 // neuropeptide signaling pathway // non-traceable author statement /// 7218 // neuropeptide signaling pathway // inferred from electronic annotation	5576 // extracellular region // non-traceable author statement	---
11012	152211_at	-0.734652	2.41806	-9.42665	1.11712e-10	2.44162e-09	13.9531	FBgn0037955	CG6950	CG6950	CG6950	41433	16212 // kynurenine-oxoglutarate transaminase activity // inferred from sequence or structural similarity /// 16847 // 1-aminocyclopropane-1-carboxylate synthase activity // inferred from electronic annotation /// 5515 // protein binding // inferred from physical interaction /// 16740 // transferase activity // inferred from electronic annotation /// 16769 // transferase activity, transferring ni…	6807 // nitrogen compound metabolism // inferred from electronic annotation /// 8652 // amino acid biosynthesis // inferred from electronic annotation /// 9058 // biosynthesis // inferred from electronic annotation	---	IPR004839 // Aminotransferase, class I and II // 6.4E-27
9430	150629_at	-1.04599	1.85797	-9.4246	1.12283e-10	2.45029e-09	13.9479	FBgn0039391	CG8934	CG8934	CG8934	43138	8324 // cation transporter activity // inferred from electronic annotation /// 8507 // sodium:iodide symporter activity // inferred from sequence or structural similarity /// 8507 // sodium:iodide symporter activity // inferred from sequence similarity	6732 // coenzyme metabolism // inferred from electronic annotation /// 6812 // cation transport // inferred from electronic annotation /// 6858 // extracellular transport // inferred from electronic annotation /// 51189 // prosthetic group metabolism // inferred from electronic annotation	16020 // membrane // inferred from electronic annotation	---
10468	151667_s_at	-0.536095	2.97088	-9.42353	1.12585e-10	2.45305e-09	13.9452	FBgn0035906	CG6673	CG6673	CG6673	38974	4364 // glutathione transferase activity // inferred from sequence or structural similarity /// 4364 // glutathione transferase activity // inferred from electronic annotation /// 4364 // glutathione transferase activity // inferred from sequence similarity	6800 // oxygen and reactive oxygen species metabolism // inferred from electronic annotation /// 6952 // defense response // inferred from electronic annotation /// 9636 // response to toxin // inferred from electronic annotation /// 8152 // metabolism // inferred from electronic annotation	5737 // cytoplasm // inferred from electronic annotation	IPR004046 // Glutathione S-transferase, C-terminal // 8.7E-6 /// IPR004045 // Glutathione S-transferase, N-terminal // 3.3E-12
14	141213_at	-0.591654	2.23656	-9.41839	1.14034e-10	2.48077e-09	13.9323	FBgn0033728	CG8505	CG8505	CG8505	36351	5214 // structural constituent of cuticle (sensu Insecta) // inferred from sequence or structural similarity /// 5515 // protein binding // inferred from physical interaction /// 42302 // structural constituent of cuticle // inferred from electronic annotation /// 5214 // structural constituent of cuticle (sensu Insecta) // inferred from sequence similarity	---	---	IPR000618 // Insect cuticle protein // 8.8E-33
2623	143822_at	-0.989678	1.28341	-9.38225	1.24787e-10	2.69378e-09	13.8409	FBgn0015576	CG1121	Est8	Esterase-8	40899	4091 // carboxylesterase activity // inferred from sequence or structural similarity /// 4091 // carboxylesterase activity // non-traceable author statement /// 3824 // catalytic activity // inferred from electronic annotation /// 4759 // serine esterase activity // inferred from electronic annotation /// 4091 // carboxylesterase activity // inferred from sequence similarity	---	---	IPR002018 // Carboxylesterase, type B // 1.0E-126
4503	145702_at	-0.760523	1.4327	-9.35842	1.32439e-10	2.85456e-09	13.7806	FBgn0031523	CG15408	CG15408	CG15408	33548	5353 // fructose transporter activity // inferred from sequence or structural similarity /// 5353 // fructose transporter activity // inferred from sequence similarity	5975 // carbohydrate metabolism // inferred from electronic annotation /// 8643 // carbohydrate transport // inferred from electronic annotation	16020 // membrane // inferred from electronic annotation /// 16021 // integral to membrane // inferred from electronic annotation	IPR005828 // General substrate transporter // 1.9E-11 /// IPR005828 // General substrate transporter // 1.5E-4
11865	153064_at	-1.16134	4.60333	-9.34905	1.35575e-10	2.91767e-09	13.7568	FBgn0032055	CG13091	CG13091	CG13091	34188	16491 // oxidoreductase activity // inferred from electronic annotation	---	---	IPR004262 // Male sterility protein // 1.4E-74
11488	152687_at	-1.03242	2.40777	-9.32583	1.43686e-10	3.08275e-09	13.6979	FBgn0030688	CG8952	CG8952	CG8952	32525	4252 // serine-type endopeptidase activity // inferred from sequence or structural similarity /// 4263 // chymotrypsin activity // inferred from electronic annotation /// 4295 // trypsin activity // inferred from electronic annotation /// 42708 // elastase activity // non-traceable author statement /// 4252 // serine-type endopeptidase activity // inferred from electronic annotation /// 4252 // s…	6508 // proteolysis // non-traceable author statement /// 6508 // proteolysis // inferred from electronic annotation	---	IPR001254 // Peptidase S1, chymotrypsin // 3.2E-59
5106	146305_at	-1.03722	3.48953	-9.31415	1.47947e-10	3.16449e-09	13.6683	FBgn0020367	CG3762	Vha68-2	Vha68-2	45012	5524 // ATP binding // inferred from electronic annotation /// 8553 // hydrogen-exporting ATPase activity, phosphorylative mechanism // inferred from sequence or structural similarity /// 8553 // hydrogen-exporting ATPase activity, phosphorylative mechanism // non-traceable author statement /// 46933 // hydrogen-transporting ATP synthase activity, rotational mechanism // inferred from electronic …	6144 // purine base metabolism // inferred from electronic annotation /// 6754 // ATP biosynthesis // inferred from electronic annotation /// 6812 // cation transport // inferred from electronic annotation /// 15986 // ATP synthesis coupled proton transport // inferred from electronic annotation /// 6810 // transport // inferred from electronic annotation /// 6811 // ion transport // inferred fro…	221 // hydrogen-transporting ATPase V1 domain // inferred from sequence or structural similarity /// 221 // hydrogen-transporting ATPase V1 domain // non-traceable author statement /// 16469 // proton-transporting two-sector ATPase complex // inferred from electronic annotation /// 221 // hydrogen-transporting ATPase V1 domain // inferred from sequence similarity	IPR004100 // H+-transporting two-sector ATPase, alpha/beta subunit, N-terminal // 1.5E-21 /// IPR000793 // H+-transporting two-sector ATPase, alpha/beta subunit, C-terminal // 5.7E-58 /// IPR000194 // H+-transporting two-sector ATPase, alpha/beta subunit, central region // 2.2E-86
11075	152274_at	-0.634621	2.14666	-9.30956	1.4966e-10	3.19139e-09	13.6566	FBgn0046302	CG10650	CG10650	CG10650	35162	16491 // oxidoreductase activity // inferred from electronic annotation /// 5515 // protein binding // inferred from physical interaction	8152 // metabolism // inferred from electronic annotation	---	---
11804	153003_at	-0.547009	1.08229	-9.30979	1.49572e-10	3.19139e-09	13.6572	FBgn0036834	CG6836	CG6836	CG6836	40070	---	---	---	---
10979	152178_at	-0.524282	1.28218	-9.29799	1.54061e-10	3.27527e-09	13.6273	FBgn0037723	CG8327	SpdS	Spermidine Synthase	41167	4766 // spermidine synthase activity // inferred from sequence or structural similarity /// 8757 // S-adenosylmethionine-dependent methyltransferase activity // inferred from electronic annotation /// 3824 // catalytic activity // inferred from electronic annotation /// 16740 // transferase activity // inferred from electronic annotation /// 4766 // spermidine synthase activity // inferred from s…	8295 // spermidine biosynthesis // inferred from sequence or structural similarity /// 8295 // spermidine biosynthesis // inferred from sequence similarity	---	IPR001045 // Spermine synthase // 2.4E-118 /// IPR001045 // Spermine synthase // 1.3E-82
7689	148888_at	-0.612396	1.46511	-9.28896	1.5759e-10	3.34014e-09	13.6043	FBgn0036616	CG4893	CG4893	CG4893	39813	---	---	---	IPR008907 // P25-alpha // 3.5E-104
12583	153782_at	-0.81801	5.32773	-9.27236	1.64293e-10	3.47172e-09	13.5621	FBgn0035978	CG4347	UGP	UGP	39065	3983 // UTP:glucose-1-phosphate uridylyltransferase activity // inferred from sequence or structural similarity /// 42802 // identical protein binding // inferred from physical interaction /// 16779 // nucleotidyltransferase activity // inferred from electronic annotation /// 3983 // UTP:glucose-1-phosphate uridylyltransferase activity // inferred from sequence similarity	5976 // polysaccharide metabolism // inferred from electronic annotation /// 8152 // metabolism // inferred from electronic annotation	---	IPR002618 // UTP--glucose-1-phosphate uridylyltransferase // 1.0E-126 /// IPR002618 // UTP--glucose-1-phosphate uridylyltransferase // 1.0E-126
13192	154391_at	-0.443707	1.99712	-9.26299	1.68205e-10	3.54902e-09	13.5382	FBgn0033635	CG7777	CG7777	CG7777	36237	5372 // water transporter activity // inferred from sequence or structural similarity /// 5386 // carrier activity // inferred from electronic annotation /// 5488 // binding // inferred from electronic annotation /// 5215 // transporter activity // inferred from electronic annotation /// 5372 // water transporter activity // inferred from sequence similarity	6810 // transport // inferred from electronic annotation /// 19725 // cell homeostasis // inferred from electronic annotation	16020 // membrane // inferred from electronic annotation /// 16021 // integral to membrane // inferred from electronic annotation	IPR000425 // Major intrinsic protein // 1.4E-81
7917	149116_at	-1.132	4.63179	-9.25699	1.70756e-10	3.59743e-09	13.523	FBgn0036969	CG6663	CG6663	CG6663	40235	4867 // serine-type endopeptidase inhibitor activity // inferred from sequence or structural similarity /// 4867 // serine-type endopeptidase inhibitor activity // inferred from sequence similarity	---	---	IPR000215 // Serpin // 1.1E-15
7853	149052_at	-0.591775	1.40414	-9.22576	1.84703e-10	3.87959e-09	13.4434	FBgn0036875	CG9449	CG9449	CG9449	40117	3993 // acid phosphatase activity // inferred from sequence or structural similarity /// 3993 // acid phosphatase activity // inferred from electronic annotation /// 3993 // acid phosphatase activity // inferred from sequence similarity	6796 // phosphate metabolism // inferred from electronic annotation	---	IPR000560 // Histidine acid phosphatase // 5.2E-18
13184	154383_at	-0.452863	2.74543	-9.20607	1.9409e-10	4.05852e-09	13.3931	FBgn0032721	CG10602	CG10602	CG10602	35146	4179 // membrane alanyl aminopeptidase activity // inferred from electronic annotation /// 4463 // leukotriene-A4 hydrolase activity // inferred from sequence or structural similarity /// 8237 // metallopeptidase activity // inferred from electronic annotation /// 8270 // zinc ion binding // inferred from electronic annotation /// 4463 // leukotriene-A4 hydrolase activity // inferred from sequenc…	6508 // proteolysis // inferred from electronic annotation /// 6952 // defense response // inferred from electronic annotation /// 7166 // cell surface receptor linked signal transduction // inferred from electronic annotation	---	IPR001930 // Peptidase M1, membrane alanine aminopeptidase // 4.6E-110 /// IPR001930 // Peptidase M1, membrane alanine aminopeptidase // 4.6E-110
3978	145177_at	-0.620383	4.27143	-9.19299	2.00592e-10	4.18823e-09	13.3597	FBgn0030733	CG3560	CG3560	CG3560	32586	8121 // ubiquinol-cytochrome-c reductase activity // inferred from sequence or structural similarity /// 5515 // protein binding // inferred from physical interaction /// 8121 // ubiquinol-cytochrome-c reductase activity // inferred from electronic annotation /// 8121 // ubiquinol-cytochrome-c reductase activity // inferred from sequence similarity	6122 // mitochondrial electron transport, ubiquinol to cytochrome c // inferred from sequence or structural similarity /// 6118 // electron transport // inferred from electronic annotation /// 6122 // mitochondrial electron transport, ubiquinol to cytochrome c // inferred from electronic annotation /// 6122 // mitochondrial electron transport, ubiquinol to cytochrome c // inferred from sequence s…	5750 // respiratory chain complex III (sensu Eukaryota) // inferred from sequence or structural similarity /// 5750 // respiratory chain complex III (sensu Eukaryota) // inferred from sequence similarity	IPR003197 // Cytochrome bd ubiquinol oxidase, 14 kDa subunit // 1.2E-48
11379	152578_at	-0.574362	0.540449	-9.18752	2.0338e-10	4.23381e-09	13.3458	FBgn0037003	CG18281	CG18281	CG18281	40274	5215 // transporter activity // inferred from electronic annotation /// 15520 // tetracycline:hydrogen antiporter activity // inferred from electronic annotation	5975 // carbohydrate metabolism // inferred from electronic annotation /// 6810 // transport // inferred from electronic annotation /// 8643 // carbohydrate transport // inferred from electronic annotation /// 15904 // tetracycline transport // inferred from electronic annotation	16021 // integral to membrane // inferred from electronic annotation	---
8290	149489_at	-0.530081	1.52998	-9.18061	2.06957e-10	4.30187e-09	13.3281	FBgn0062412	CG7459	Ctr1B	Copper transporter 1B	40989	5375 // copper ion transporter activity // inferred from direct assay /// 5375 // copper ion transporter activity // inferred from sequence or structural similarity /// 5375 // copper ion transporter activity // non-traceable author statement /// 5375 // copper ion transporter activity // inferred from electronic annotation /// 5375 // copper ion transporter activity // inferred from sequence sim…	6825 // copper ion transport // inferred from direct assay /// 6825 // copper ion transport // inferred from electronic annotation	5886 // plasma membrane // non-traceable author statement /// 16021 // integral to membrane // inferred from electronic annotation	IPR007274 // Ctr copper transporter // 2.4E-63
12039	153238_at	-0.559441	1.62314	-9.16631	2.14557e-10	4.45324e-09	13.2915	FBgn0052473	CG32473	CG32473	CG32473	41636	3676 // nucleic acid binding // inferred from electronic annotation /// 4179 // membrane alanyl aminopeptidase activity // inferred from electronic annotation /// 4230 // glutamyl aminopeptidase activity // inferred from sequence or structural similarity /// 4519 // endonuclease activity // inferred from electronic annotation /// 8270 // zinc ion binding // inferred from electronic annotation ///…	6508 // proteolysis // inferred from electronic annotation	---	IPR001930 // Peptidase M1, membrane alanine aminopeptidase // 1.0E-126 /// IPR001930 // Peptidase M1, membrane alanine aminopeptidase // 1.0E-126 /// IPR001930 // Peptidase M1, membrane alanine aminopeptidase // 1.0E-126
6273	147472_at	-0.583802	3.57893	-9.1505	2.23294e-10	4.62089e-09	13.2511	FBgn0034405	CG15102	Jheh2	Juvenile hormone epoxide hydrolase 2	37181	4301 // epoxide hydrolase activity // inferred from sequence or structural similarity /// 8096 // juvenile hormone epoxide hydrolase activity // non-traceable author statement /// 5515 // protein binding // inferred from physical interaction /// 3824 // catalytic activity // inferred from electronic annotation /// 4301 // epoxide hydrolase activity // inferred from electronic annotation /// 16787…	6719 // juvenile hormone catabolism // non-traceable author statement /// 6952 // defense response // inferred from electronic annotation /// 9636 // response to toxin // inferred from electronic annotation /// 19439 // aromatic compound catabolism // inferred from electronic annotation	5792 // microsome // inferred from sequence or structural similarity /// 5783 // endoplasmic reticulum // inferred from electronic annotation /// 5792 // microsome // inferred from electronic annotation /// 16020 // membrane // inferred from electronic annotation /// 16021 // integral to membrane // inferred from electronic annotation /// 5792 // microsome // inferred from sequence similarity	IPR000073 // Alpha/beta hydrolase fold // 9.3E-13 /// IPR010497 // Epoxide hydrolase, N-terminal // 1.7E-69 /// IPR010497 // Epoxide hydrolase, N-terminal // 2.2E-37
12194	153393_at	-0.414364	1.09148	-9.1487	2.24315e-10	4.63518e-09	13.2465	FBgn0003515	CG4314	st	scarlet	39836	166 // nucleotide binding // inferred from electronic annotation /// 5395 // eye pigment precursor transporter activity // non-traceable author statement /// 5524 // ATP binding // inferred from electronic annotation /// 15646 // permease activity // inferred from electronic annotation /// 42626 // ATPase activity, coupled to transmembrane movement of substances // inferred from sequence or struc…	6726 // eye pigment biosynthesis // non-traceable author statement /// 6727 // ommochrome biosynthesis // inferred from mutant phenotype /// 6727 // ommochrome biosynthesis // non-traceable author statement /// 6856 // eye pigment precursor transport // traceable author statement /// 6810 // transport // inferred from electronic annotation	5887 // integral to plasma membrane // non-traceable author statement /// 43190 // ATP-binding cassette (ABC) transporter complex // inferred from sequence or structural similarity /// 16020 // membrane // inferred from electronic annotation /// 16021 // integral to membrane // inferred from electronic annotation /// 43190 // ATP-binding cassette (ABC) transporter complex // inferred from sequenc…	IPR003439 // ABC transporter // 2.5E-37
60	141259_at	-0.497153	1.68602	-9.13574	2.31781e-10	4.76137e-09	13.2133	FBgn0052633	CG32633	CG32633	CG32633	326225	---	---	---	---
1104	142303_at	-1.03785	1.90206	-9.12961	2.35401e-10	4.82158e-09	13.1976	FBgn0029155	CG5889	Mdh	Mdh	43936	4473 // malate dehydrogenase (oxaloacetate-decarboxylating) (NADP+) activity // inferred from sequence or structural similarity /// 4473 // malate dehydrogenase (oxaloacetate-decarboxylating) (NADP+) activity // non-traceable author statement /// 16831 // carboxy-lyase activity // inferred from electronic annotation /// 5515 // protein binding // inferred from physical interaction /// 4470 // mal…	6090 // pyruvate metabolism // inferred from sequence or structural similarity /// 6099 // tricarboxylic acid cycle // inferred from electronic annotation /// 6108 // malate metabolism // inferred from sequence or structural similarity /// 6108 // malate metabolism // inferred from electronic annotation /// 6090 // pyruvate metabolism // inferred from sequence similarity /// 6108 // malate metabo…	5739 // mitochondrion // inferred from sequence or structural similarity /// 5739 // mitochondrion // inferred from sequence similarity	IPR001891 // Malic oxidoreductase // 1.0E-126 /// IPR001891 // Malic oxidoreductase // 1.0E-126
8551	149750_at	-0.390689	1.01456	-9.11925	2.41654e-10	4.93524e-09	13.171	FBgn0038014	CG10041	CG10041	CG10041	41496	4252 // serine-type endopeptidase activity // inferred from sequence or structural similarity /// 4252 // serine-type endopeptidase activity // non-traceable author statement /// 4263 // chymotrypsin activity // inferred from electronic annotation /// 4295 // trypsin activity // inferred from electronic annotation /// 4252 // serine-type endopeptidase activity // inferred from electronic annotati…	6508 // proteolysis // non-traceable author statement /// 6508 // proteolysis // inferred from electronic annotation	---	IPR001254 // Peptidase S1, chymotrypsin // 5.5E-24
12382	153581_at	-0.40306	2.58448	-9.11707	2.42987e-10	4.95524e-09	13.1654	FBgn0022268	CG5183	KdelR	KDEL receptor	34427	4872 // receptor activity // inferred from electronic annotation /// 5046 // KDEL sequence binding // inferred from sequence or structural similarity /// 5046 // KDEL sequence binding // non-traceable author statement /// 46923 // ER retention sequence binding // inferred from electronic annotation /// 5046 // KDEL sequence binding // inferred from sequence similarity	6621 // protein retention in ER // non-traceable author statement /// 6887 // exocytosis // inferred from electronic annotation /// 6890 // retrograde vesicle-mediated transport, Golgi to ER // inferred from sequence or structural similarity /// 6890 // retrograde vesicle-mediated transport, Golgi to ER // non-traceable author statement /// 6891 // intra-Golgi vesicle-mediated transport // non-tr…	5783 // endoplasmic reticulum // non-traceable author statement /// 16021 // integral to membrane // non-traceable author statement /// 30140 // trans-Golgi network transport vesicle // inferred from sequence or structural similarity /// 30140 // trans-Golgi network transport vesicle // non-traceable author statement /// 5783 // endoplasmic reticulum // inferred from electronic annotation /// 160…	IPR000133 // ER lumen protein retaining receptor // 1.0E-126
7916	149115_at	-1.00152	3.6958	-9.11285	2.45596e-10	5.00117e-09	13.1546	FBgn0036970	CG6289	CG6289	CG6289	40236	4867 // serine-type endopeptidase inhibitor activity // inferred from sequence or structural similarity /// 4867 // serine-type endopeptidase inhibitor activity // inferred from electronic annotation /// 4867 // serine-type endopeptidase inhibitor activity // inferred from sequence similarity	45861 // negative regulation of proteolysis // inferred from sequence or structural similarity /// 45861 // negative regulation of proteolysis // inferred from sequence similarity	---	IPR000215 // Serpin // 0.016 /// IPR000215 // Serpin // 1.9E-16
11480	152679_at	-0.565256	2.59215	-9.07347	2.71366e-10	5.50194e-09	13.0535	FBgn0039321	CG10550	CG10550	CG10550	43061	16301 // kinase activity // inferred from electronic annotation /// 16740 // transferase activity // inferred from electronic annotation	---	---	IPR004119 // Protein of unknown function DUF227 // 6.1E-114
10784	151983_at	-0.516022	4.05155	-9.05466	2.84633e-10	5.76258e-09	13.0051	FBgn0027590	CG16936	CG16936	CG16936	37960	4364 // glutathione transferase activity // inferred from sequence or structural similarity /// 16740 // transferase activity // inferred from electronic annotation /// 4364 // glutathione transferase activity // inferred from sequence similarity	6952 // defense response // inferred from electronic annotation /// 9636 // response to toxin // inferred from electronic annotation	---	IPR004046 // Glutathione S-transferase, C-terminal // 4.5E-11 /// IPR004045 // Glutathione S-transferase, N-terminal // 1.7E-15
13531	154730_at	-0.708439	2.25702	-9.04773	2.89684e-10	5.85638e-09	12.9873	FBgn0034618	CG9485	CG9485	CG9485	37435	4134 // 4-alpha-glucanotransferase activity // inferred from sequence or structural similarity /// 4135 // amylo-alpha-1,6-glucosidase activity // inferred from sequence or structural similarity /// 16799 // hydrolase activity, hydrolyzing N-glycosyl compounds // inferred from electronic annotation /// 4135 // amylo-alpha-1,6-glucosidase activity // inferred from electronic annotation /// 4134 //…	5977 // glycogen metabolism // inferred from electronic annotation /// 5978 // glycogen biosynthesis // inferred from electronic annotation	---	IPR010401 // Amylo-alpha-1,6-glucosidase // 1.0E-126 /// IPR010401 // Amylo-alpha-1,6-glucosidase // 1.0E-126 /// IPR010401 // Amylo-alpha-1,6-glucosidase // 1.0E-126
12810	154009_at	-0.528138	1.43827	-9.04672	2.90432e-10	5.86305e-09	12.9847	FBgn0023519	CG3109	mRpL16	mitochondrial ribosomal protein L16	31150	3735 // structural constituent of ribosome // inferred from sequence or structural similarity /// 3735 // structural constituent of ribosome // inferred from electronic annotation /// 3735 // structural constituent of ribosome // inferred from sequence similarity	6412 // protein biosynthesis // inferred from sequence or structural similarity /// 6412 // protein biosynthesis // inferred from electronic annotation /// 6412 // protein biosynthesis // inferred from sequence similarity	5762 // mitochondrial large ribosomal subunit // inferred from sequence or structural similarity /// 5622 // intracellular // inferred from electronic annotation /// 5840 // ribosome // inferred from electronic annotation /// 5762 // mitochondrial large ribosomal subunit // inferred from sequence similarity	IPR000114 // Ribosomal protein L16 // 1.4E-8
4499	145698_at	-0.85002	1.5458	-9.01176	3.17421e-10	6.38947e-09	12.8946	FBgn0031517	CG15406	CG15406	CG15406	33542	5353 // fructose transporter activity // inferred from sequence or structural similarity /// 5215 // transporter activity // inferred from electronic annotation /// 5353 // fructose transporter activity // inferred from sequence similarity	5975 // carbohydrate metabolism // inferred from electronic annotation /// 8643 // carbohydrate transport // inferred from electronic annotation /// 6810 // transport // inferred from electronic annotation	16020 // membrane // inferred from electronic annotation /// 16021 // integral to membrane // inferred from electronic annotation	IPR005828 // General substrate transporter // 3.4E-31
7330	148529_at	-0.677716	0.964302	-8.96942	3.5357e-10	7.05628e-09	12.7853	FBgn0036094	CG14153	CG14153	CG14153	39208	---	---	---	---
1187	142386_at	-0.882199	2.17478	-8.96497	3.57606e-10	7.11655e-09	12.7738	FBgn0034247	CG6484	CG6484	CG6484	36994	5351 // sugar porter activity // inferred from electronic annotation /// 5355 // glucose transporter activity // inferred from sequence or structural similarity /// 5215 // transporter activity // inferred from electronic annotation /// 5355 // glucose transporter activity // inferred from sequence similarity	5975 // carbohydrate metabolism // inferred from electronic annotation /// 8643 // carbohydrate transport // inferred from electronic annotation /// 6810 // transport // inferred from electronic annotation	16020 // membrane // inferred from electronic annotation /// 16021 // integral to membrane // inferred from electronic annotation	IPR005828 // General substrate transporter // 1.8E-106
7212	148411_at	-0.596359	0.4527	-8.95258	3.69083e-10	7.31379e-09	12.7418	FBgn0035905	CG6781	CG6781	CG6781	38973	4364 // glutathione transferase activity // inferred from sequence or structural similarity /// 5515 // protein binding // inferred from physical interaction /// 4364 // glutathione transferase activity // inferred from electronic annotation /// 16740 // transferase activity // inferred from electronic annotation /// 4364 // glutathione transferase activity // inferred from sequence similarity	6800 // oxygen and reactive oxygen species metabolism // inferred from electronic annotation /// 6952 // defense response // inferred from electronic annotation /// 9636 // response to toxin // inferred from electronic annotation /// 8152 // metabolism // inferred from electronic annotation	5737 // cytoplasm // inferred from electronic annotation	IPR004045 // Glutathione S-transferase, N-terminal // 3.0E-14
1751	142950_at	-1.25924	2.6682	-8.94955	3.71955e-10	7.36031e-09	12.734	FBgn0028533	CG7953	CG7953	CG7953	34801	---	---	---	---
7864	149063_at	-0.793131	1.79119	-8.94255	3.78656e-10	7.48234e-09	12.7159	FBgn0036891	CG9372	CG9372	CG9372	40137	4263 // chymotrypsin activity // inferred from electronic annotation /// 4295 // trypsin activity // non-traceable author statement /// 8236 // serine-type peptidase activity // inferred from sequence or structural similarity /// 4252 // serine-type endopeptidase activity // inferred from electronic annotation /// 8233 // peptidase activity // inferred from electronic annotation /// 16787 // hydr…	6508 // proteolysis // non-traceable author statement /// 6508 // proteolysis // inferred from electronic annotation	---	IPR001254 // Peptidase S1, chymotrypsin // 8.7E-76
11716	152915_at	-0.597047	0.967564	-8.92971	3.9128e-10	7.71004e-09	12.6826	FBgn0030589	CG9519	CG9519	CG9519	32415	8812 // choline dehydrogenase activity // inferred from sequence or structural similarity /// 50660 // FAD binding // inferred from electronic annotation /// 16491 // oxidoreductase activity // inferred from electronic annotation /// 16614 // oxidoreductase activity, acting on CH-OH group of donors // inferred from electronic annotation /// 8812 // choline dehydrogenase activity // inferred from …	6118 // electron transport // inferred from electronic annotation /// 6066 // alcohol metabolism // inferred from electronic annotation	---	IPR000172 // Glucose-methanol-choline oxidoreductase // 3.1E-112 /// IPR007867 // GMC oxidoreductase // 4.9E-45
5287	146486_at	-0.65008	1.22046	-8.92255	3.98511e-10	7.84148e-09	12.6641	FBgn0032770	CG13086	CG13086	CG13086	35208	---	---	---	---
4702	145901_at	-0.450458	1.4326	-8.8994	4.22814e-10	8.30802e-09	12.6041	FBgn0031821	CG9542	CG9542	CG9542	33907	3824 // catalytic activity // inferred from electronic annotation	---	---	---
2473	143672_at	-0.842698	5.76972	-8.8951	4.27489e-10	8.38813e-09	12.593	FBgn0011669	CG5016	Mst57Db	Male-specific RNA 57Db	43122	4418 // hydroxymethylbilane synthase activity // inferred from electronic annotation	18991 // oviposition // non-traceable author statement /// 45297 // post-mating behavior // non-traceable author statement /// 6779 // porphyrin biosynthesis // inferred from electronic annotation	5576 // extracellular region // non-traceable author statement	---
4250	145449_at	-0.42715	0.643805	-8.89378	4.28939e-10	8.39666e-09	12.5895	FBgn0031140	CG12092	NPC1b	NPC1b	33072	4197 // cysteine-type endopeptidase activity // inferred from electronic annotation /// 4872 // receptor activity // inferred from electronic annotation /// 8158 // hedgehog receptor activity // inferred from electronic annotation	6508 // proteolysis // inferred from electronic annotation /// 6629 // lipid metabolism // inferred from electronic annotation /// 6869 // lipid transport // inferred from electronic annotation	5886 // plasma membrane // inferred from sequence or structural similarity /// 5886 // plasma membrane // inferred from sequence similarity	IPR003392 // Patched family // 6.5E-29 /// IPR003392 // Patched family // 4.5E-7
6069	147268_at	-0.608564	1.16247	-8.89361	4.29122e-10	8.39666e-09	12.5891	FBgn0034053	CG8302	Cyp4aa1	Cyp4aa1	36752	4497 // monooxygenase activity // inferred from electronic annotation /// 16491 // oxidoreductase activity // inferred from electronic annotation	6118 // electron transport // inferred from electronic annotation /// 8202 // steroid metabolism // inferred from electronic annotation /// 42445 // hormone metabolism // non-traceable author statement /// 46701 // insecticide catabolism // non-traceable author statement	5792 // microsome // non-traceable author statement /// 16020 // membrane // non-traceable author statement	IPR001128 // Cytochrome P450 // 2.1E-87
4584	145783_at	-0.504733	2.17792	-8.88241	4.41603e-10	8.62881e-09	12.5601	FBgn0031636	CG12194	CG12194	CG12194	33685	5215 // transporter activity // inferred from electronic annotation	6810 // transport // inferred from electronic annotation	16021 // integral to membrane // inferred from electronic annotation	---
8200	149399_at	-0.440314	1.44887	-8.86057	4.67034e-10	9.0877e-09	12.5033	FBgn0037440	CG1041	CG1041	CG1041	40787	4092 // carnitine O-acetyltransferase activity // inferred from sequence or structural similarity /// 5515 // protein binding // inferred from physical interaction /// 8415 // acyltransferase activity // inferred from electronic annotation /// 16740 // transferase activity // inferred from electronic annotation /// 4092 // carnitine O-acetyltransferase activity // inferred from sequence similarity	6520 // amino acid metabolism // inferred from electronic annotation	5739 // mitochondrion // inferred from sequence or structural similarity /// 5777 // peroxisome // inferred from sequence or structural similarity /// 5739 // mitochondrion // inferred from sequence similarity /// 5777 // peroxisome // inferred from sequence similarity	IPR000542 // Acyltransferase ChoActase/COT/CPT // 1.0E-126
7732	148931_at	-0.588462	2.41905	-8.85783	4.70325e-10	9.13905e-09	12.4962	FBgn0036696	CG14057	CG14057	CG14057	39915	4540 // ribonuclease activity // inferred from electronic annotation	8033 // tRNA processing // inferred from electronic annotation	---	IPR002759 // Ribonuclease P-related protein // 2.9E-48 /// IPR002759 // Ribonuclease P-related protein // 2.9E-48
2270	143469_at	-0.757453	1.60741	-8.85215	4.77228e-10	9.26034e-09	12.4815	FBgn0004430	CG1165	LysS	Lysozyme S	38130	3796 // lysozyme activity // inferred from sequence or structural similarity /// 3796 // lysozyme activity // non-traceable author statement /// 3796 // lysozyme activity // inferred from electronic annotation /// 3824 // catalytic activity // inferred from electronic annotation /// 16787 // hydrolase activity // inferred from electronic annotation /// 16798 // hydrolase activity, acting on glyco…	6960 // antimicrobial humoral response (sensu Protostomia) // non-traceable author statement /// 16998 // cell wall catabolism // inferred from electronic annotation /// 5975 // carbohydrate metabolism // inferred from electronic annotation /// 19835 // cytolysis // inferred from electronic annotation /// 42742 // defense response to bacteria // inferred from electronic annotation	5576 // extracellular region // inferred from electronic annotation	IPR001916 // Glycoside hydrolase, family 22 // 6.7E-53
1727	142926_at	-0.416977	1.63456	-8.84946	4.80532e-10	9.31156e-09	12.4745	FBgn0020615	CG8553	SelD	selenide,water dikinase	36587	4756 // selenide, water dikinase activity // inferred from direct assay /// 4756 // selenide, water dikinase activity // traceable author statement /// 5524 // ATP binding // inferred from electronic annotation /// 5515 // protein binding // inferred from physical interaction /// 166 // nucleotide binding // inferred from electronic annotation /// 3824 // catalytic activity // inferred from elect…	7444 // imaginal disc development // inferred from mutant phenotype /// 8283 // cell proliferation // inferred from mutant phenotype /// 16260 // selenocysteine biosynthesis // inferred from mutant phenotype /// 16260 // selenocysteine biosynthesis // traceable author statement /// 7049 // cell cycle // inferred from electronic annotation /// 7275 // development // inferred from electronic annota…	---	IPR010918 // AIR synthase related protein, C-terminal // 9.0E-20 /// IPR000728 // AIR synthase related protein // 7.2E-31
4575	145774_at	-0.506636	1.06591	-8.84372	4.87662e-10	9.43667e-09	12.4595	FBgn0031623	CG15632	Taf12L	TBP-associated factor 30kD subunit 2	33672	16251 // general RNA polymerase II transcription factor activity // inferred from sequence or structural similarity /// 16251 // general RNA polymerase II transcription factor activity // inferred from sequence similarity	6367 // transcription initiation from RNA polymerase II promoter // inferred from sequence or structural similarity /// 7140 // male meiosis // non-traceable author statement /// 7283 // spermatogenesis // non-traceable author statement /// 6352 // transcription initiation // inferred from electronic annotation /// 6367 // transcription initiation from RNA polymerase II promoter // inferred from …	5669 // transcription factor TFIID complex // inferred from sequence or structural similarity /// 5669 // transcription factor TFIID complex // inferred from electronic annotation /// 5669 // transcription factor TFIID complex // inferred from sequence similarity	IPR003228 // Transcription initiation factor TFIID // 1.9E-41
3923	145122_at	-0.480136	1.66948	-8.83632	4.9701e-10	9.57786e-09	12.4403	FBgn0030643	CG15641	CG15641	CG15641	32477	---	---	---	---
8700	149899_at	-0.678755	2.82671	-8.81834	5.20505e-10	1.00031e-08	12.3935	FBgn0038236	CG3360	Cyp313a1	Cyp313a1	41759	3735 // structural constituent of ribosome // inferred from electronic annotation /// 4497 // monooxygenase activity // inferred from electronic annotation /// 16491 // oxidoreductase activity // inferred from electronic annotation	6118 // electron transport // inferred from electronic annotation /// 6412 // protein biosynthesis // inferred from electronic annotation /// 8202 // steroid metabolism // inferred from electronic annotation /// 17143 // insecticide metabolism // non-traceable author statement	5622 // intracellular // inferred from electronic annotation /// 5792 // microsome // non-traceable author statement /// 5840 // ribosome // inferred from electronic annotation /// 16020 // membrane // non-traceable author statement	IPR001128 // Cytochrome P450 // 5.5E-5 /// IPR001128 // Cytochrome P450 // 4.8E-59
513	141712_at	-0.465415	1.52514	-8.81763	5.2145e-10	1.00076e-08	12.3917	FBgn0039774 /// FBgn0068523	CG1471	CDase /// DyakCDase	Ceramidase /// CDase	43618	16298 // lipase activity // inferred from electronic annotation /// 17040 // ceramidase activity // inferred from direct assay /// 17040 // ceramidase activity // non-traceable author statement	6629 // lipid metabolism // inferred from electronic annotation	---	IPR006823 // Neutral/alkaline nonlysosomal ceramidase // 1.0E-126
4364	145563_at	-0.409603	0.521929	-8.78156	5.72139e-10	1.09504e-08	12.2977	FBgn0031312	CG4775	l(2)k00619	lethal (2) k00619	33298	---	---	---	---
6321	147520_at	-0.889942	4.51921	-8.76912	5.90767e-10	1.12761e-08	12.2653	FBgn0034474	CG13873	Obp56g	Odorant-binding protein 56g	37270	5549 // odorant binding // inferred from sequence or structural similarity /// 5549 // odorant binding // non-traceable author statement /// 5549 // odorant binding // inferred from electronic annotation /// 5549 // odorant binding // inferred from sequence similarity	6810 // transport // inferred from electronic annotation /// 7606 // sensory perception of chemical stimulus // inferred from sequence or structural similarity /// 7606 // sensory perception of chemical stimulus // inferred from sequence similarity	---	IPR006170 // Pheromone/general odorant binding protein, PBP/GOBP // 3.9E-25 /// IPR006170 // Pheromone/general odorant binding protein, PBP/GOBP // 1.6E-23
10916	152115_at	-0.44464	2.31552	-8.7622	6.01396e-10	1.14633e-08	12.2472	FBgn0035519	CG1309	CG1309	CG1309	38519	3824 // catalytic activity // inferred from electronic annotation	6952 // defense response // inferred from electronic annotation	---	---
10579	151778_at	-0.493192	1.22396	-8.75019	6.20294e-10	1.17915e-08	12.2158	FBgn0031514	CG3332	CG3332	CG3332	33539	5515 // protein binding // inferred from physical interaction	---	---	IPR004878 // Protein of unknown function DUF270 // 5.0E-41 /// IPR004878 // Protein of unknown function DUF270 // 4.8E-92 /// IPR004878 // Protein of unknown function DUF270 // 5.0E-41 /// IPR004878 // Protein of unknown function DUF270 // 4.8E-92
10329	151528_at	-0.694543	1.46511	-8.712	6.84559e-10	1.29429e-08	12.116	FBgn0000635 /// FBgn0082824 /// FBgn0082801	CG3665	Fas2 /// DanaFas2 /// DpaiFas2	Fasciclin 2 /// Fas2 /// Fas2	31364	5515 // protein binding // inferred from electronic annotation	1746 // Bolwig's organ morphogenesis // inferred from expression pattern /// 1746 // Bolwig's organ morphogenesis // inferred from mutant phenotype /// 7156 // homophilic cell adhesion // inferred from direct assay /// 7165 // signal transduction // inferred from electronic annotation /// 7398 // ectoderm development // inferred from electronic annotation /// 7413 // axonal fasciculation // non-t…	5737 // cytoplasm // inferred from direct assay /// 5886 // plasma membrane // inferred from direct assay /// 5886 // plasma membrane // non-traceable author statement /// 16021 // integral to membrane // traceable author statement /// 30424 // axon // traceable author statement /// 42734 // presynaptic membrane // traceable author statement /// 45211 // postsynaptic membrane // traceable author …	IPR003961 // Fibronectin, type III // 3.5E-13 /// IPR003961 // Fibronectin, type III // 2.1E-7 /// IPR007110 // Immunoglobulin-like // 0.014 /// IPR007110 // Immunoglobulin-like // 5.1E-10 /// IPR007110 // Immunoglobulin-like // 2.3E-6 /// IPR007110 // Immunoglobulin-like // 4.7E-5 /// IPR007110 // Immunoglobulin-like // 3.0
6576	147775_at	-0.425136	2.53297	-8.70984	6.88383e-10	1.29976e-08	12.1104	FBgn0034860	CG9812	CG9812	CG9812	37709	---	---	---	---
11054	152253_at	-0.52758	1.9385	-8.70771	6.9219e-10	1.30519e-08	12.1048	FBgn0037215	CG12582	CG12582	CG12582	40524	4567 // beta-mannosidase activity // inferred from sequence or structural similarity /// 16799 // hydrolase activity, hydrolyzing N-glycosyl compounds // inferred from electronic annotation /// 4553 // hydrolase activity, hydrolyzing O-glycosyl compounds // inferred from electronic annotation /// 4567 // beta-mannosidase activity // inferred from sequence similarity	5975 // carbohydrate metabolism // inferred from electronic annotation /// 6486 // protein amino acid glycosylation // inferred from electronic annotation	---	---
11131	152330_at	-0.673979	1.76564	-8.69221	7.20481e-10	1.35308e-08	12.0642	FBgn0002938	CG5125	ninaC	neither inactivation nor afterpotential C	34012	3774 // motor activity // inferred from electronic annotation /// 4672 // protein kinase activity // inferred from sequence or structural similarity /// 4674 // protein serine/threonine kinase activity // inferred from direct assay /// 4674 // protein serine/threonine kinase activity // inferred from sequence or structural similarity /// 4674 // protein serine/threonine kinase activity // non-tra…	6468 // protein amino acid phosphorylation // non-traceable author statement /// 6886 // intracellular protein transport // inferred from mutant phenotype /// 7010 // cytoskeleton organization and biogenesis // inferred from mutant phenotype /// 7603 // phototransduction, visible light // inferred from mutant phenotype /// 7604 // phototransduction, UV // inferred from mutant phenotype /// 8104 /…	5737 // cytoplasm // inferred from direct assay /// 5856 // cytoskeleton // non-traceable author statement /// 16027 // inaD signaling complex // traceable author statement /// 16028 // rhabdomere // inferred from direct assay /// 16459 // myosin // inferred from sequence or structural similarity /// 16461 // unconventional myosin // inferred from sequence or structural similarity /// 16461 // un…	IPR000719 // Protein kinase // 1.1E-84 /// IPR001609 // Myosin head (motor domain) // 1.0E-126
6317	147516_at	-0.756105	4.48244	-8.68532	7.33438e-10	1.37556e-08	12.0461	FBgn0034470	CG11218	Obp56d	Odorant-binding protein 56d	37266	5549 // odorant binding // inferred from electronic annotation /// 5549 // odorant binding // inferred from sequence or structural similarity /// 5549 // odorant binding // non-traceable author statement /// 5549 // odorant binding // inferred from sequence similarity	6810 // transport // inferred from electronic annotation /// 7606 // sensory perception of chemical stimulus // inferred from sequence or structural similarity /// 19236 // response to pheromone // inferred from sequence or structural similarity /// 42048 // olfactory behavior // inferred from sequence or structural similarity /// 7608 // sensory perception of smell // inferred from expression pa…	5576 // extracellular region // inferred from sequence or structural similarity /// 5576 // extracellular region // inferred from sequence similarity	IPR006170 // Pheromone/general odorant binding protein, PBP/GOBP // 1.9E-31
3476	144675_at	-1.03444	2.77967	-8.68101	7.41663e-10	1.38728e-08	12.0348	FBgn0029994	CG2254	CG2254	CG2254	31726	16491 // oxidoreductase activity // inferred from sequence or structural similarity /// 16491 // oxidoreductase activity // inferred from electronic annotation /// 16491 // oxidoreductase activity // inferred from sequence similarity	7601 // visual perception // inferred from electronic annotation /// 8152 // metabolism // inferred from electronic annotation	---	IPR002198 // Short-chain dehydrogenase/reductase SDR // 2.3E-49
4416	145615_at	-0.538854	0.182672	-8.62701	8.53021e-10	1.58499e-08	11.8932	FBgn0031384	CG4238	CG4238	CG4238	33377	4842 // ubiquitin-protein ligase activity // inferred from sequence or structural similarity /// 4842 // ubiquitin-protein ligase activity // inferred from electronic annotation /// 4842 // ubiquitin-protein ligase activity // inferred from sequence similarity	6464 // protein modification // inferred from electronic annotation /// 6508 // proteolysis // inferred from electronic annotation /// 6512 // ubiquitin cycle // inferred from electronic annotation	5622 // intracellular // inferred from electronic annotation	IPR000569 // HECT domain (Ubiquitin-protein ligase) // 4.3E-60
2193	143392_r_at	-0.636213	1.2971	-8.61594	8.77898e-10	1.6269e-08	11.8641	FBgn0003888	CG3401	Tub60D	Tubulin at 60D	37888	3924 // GTPase activity // inferred from electronic annotation /// 5200 // structural constituent of cytoskeleton // inferred from sequence or structural similarity /// 5525 // GTP binding // non-traceable author statement /// 15631 // tubulin binding // inferred from electronic annotation /// 5515 // protein binding // inferred from physical interaction /// 166 // nucleotide binding // inferred …	6886 // intracellular protein transport // inferred from electronic annotation /// 7017 // microtubule-based process // inferred from sequence or structural similarity /// 7018 // microtubule-based movement // inferred from electronic annotation /// 7059 // chromosome segregation // inferred from electronic annotation /// 7067 // mitosis // inferred from electronic annotation /// 7409 // axonogen…	5874 // microtubule // inferred from direct assay /// 5874 // microtubule // inferred from sequence or structural similarity /// 5874 // microtubule // non-traceable author statement /// 45298 // tubulin // non-traceable author statement /// 5874 // microtubule // inferred from electronic annotation /// 43234 // protein complex // inferred from electronic annotation /// 5874 // microtubule // inf…	IPR003008 // Tubulin/FtsZ, GTPase // 2.6E-105 /// IPR008280 // Tubulin/FtsZ, C-terminal // 6.7E-81
4485	145684_at	-0.765029	2.11137	-8.60914	8.93533e-10	1.65368e-08	11.8462	FBgn0031489	CG17224	CG17224	CG17224	33510	4850 // uridine phosphorylase activity // inferred from sequence or structural similarity /// 3824 // catalytic activity // inferred from electronic annotation /// 4850 // uridine phosphorylase activity // inferred from electronic annotation /// 4850 // uridine phosphorylase activity // inferred from sequence similarity	6206 // pyrimidine base metabolism // inferred from electronic annotation /// 9116 // nucleoside metabolism // inferred from electronic annotation /// 9166 // nucleotide catabolism // inferred from electronic annotation	5737 // cytoplasm // inferred from electronic annotation	---
594	141793_at	-0.505722	1.36459	-8.60471	9.03871e-10	1.67061e-08	11.8345	FBgn0029147	CG6698	NtR	NtR	43935	5231 // excitatory extracellular ligand-gated ion channel activity // inferred from sequence or structural similarity /// 5230 // extracellular ligand-gated ion channel activity // inferred from electronic annotation /// 5231 // excitatory extracellular ligand-gated ion channel activity // inferred from sequence similarity	6810 // transport // inferred from electronic annotation /// 6811 // ion transport // inferred from electronic annotation	16020 // membrane // inferred from electronic annotation /// 16021 // integral to membrane // inferred from electronic annotation /// 45211 // postsynaptic membrane // inferred from electronic annotation	IPR006202 // Neurotransmitter-gated ion-channel ligand binding domain // 2.0E-19
10223	151422_at	-0.930965	2.01545	-8.60139	9.11702e-10	1.68286e-08	11.8258	FBgn0040959	CG17814	Peritrophin-15a	Peritrophin-15a	50433	8061 // chitin binding // inferred from sequence or structural similarity /// 8061 // chitin binding // inferred from sequence similarity	---	5615 // extracellular space // inferred from sequence or structural similarity /// 5615 // extracellular space // inferred from sequence similarity	---
3785	144984_at	-0.446187	0.709389	-8.57323	9.80933e-10	1.80353e-08	11.7517	FBgn0030447	CG2200	CG2200	CG2200	32258	8236 // serine-type peptidase activity // inferred from electronic annotation /// 8239 // dipeptidyl-peptidase activity // non-traceable author statement /// 17165 // dipeptidase E activity // inferred from sequence or structural similarity /// 17165 // dipeptidase E activity // inferred from sequence similarity	6508 // proteolysis // non-traceable author statement /// 6508 // proteolysis // inferred from electronic annotation	5737 // cytoplasm // non-traceable author statement	IPR005320 // Peptidase S51, dipeptidase E // 1.7E-58
2745	143944_at	-1.42123	1.57995	-8.56352	1.00602e-09	1.84482e-08	11.7261	FBgn0020906	CG8867	Jon25Bi	Jonah 25Bi	---	4252 // serine-type endopeptidase activity // inferred from electronic annotation /// 8233 // peptidase activity // inferred from electronic annotation /// 16787 // hydrolase activity // inferred from electronic annotation /// 42708 // elastase activity // non-traceable author statement	6508 // proteolysis // inferred from electronic annotation /// 6508 // proteolysis // non-traceable author statement	---	IPR001254 // Peptidase S1, chymotrypsin // 2.5E-52
8758	149957_at	-1.12103	0.965426	-8.56244	1.00886e-09	1.8476e-08	11.7233	FBgn0038337	CG6125	CG6125	CG6125	41882	5215 // transporter activity // non-traceable author statement /// 15381 // high affinity sulfate permease activity // inferred from sequence or structural similarity /// 5215 // transporter activity // inferred from electronic annotation /// 15381 // high affinity sulfate permease activity // inferred from sequence similarity	6790 // sulfur metabolism // inferred from electronic annotation /// 6820 // anion transport // inferred from electronic annotation /// 6858 // extracellular transport // inferred from electronic annotation /// 6810 // transport // inferred from electronic annotation	16021 // integral to membrane // inferred from electronic annotation	IPR001902 // Sulphate transporter // 9.1E-15 /// IPR001902 // Sulphate transporter // 1.4E-48 /// IPR001902 // Sulphate transporter // 9.1E-15 /// IPR001902 // Sulphate transporter // 1.4E-48
9949	151148_at	-0.493679	1.86445	-8.54853	1.04605e-09	1.90823e-08	11.6866	FBgn0040666	CG12848	CG12848	CG12848	50139	---	---	---	---
8738	149937_at	-0.407924	0.980532	-8.5423	1.06319e-09	1.93697e-08	11.6701	FBgn0038290	CG6912	CG6912	CG6912	41820	5515 // protein binding // inferred from physical interaction	---	---	---
6303	147502_at	-0.380877	0.802743	-8.53685	1.07839e-09	1.95956e-08	11.6558	FBgn0034454	CG15120	CG15120	CG15120	37248	---	---	---	---
191	141390_at	-0.839957	3.61418	-8.53365	1.08741e-09	1.97339e-08	11.6473	FBgn0010609	CG8732	l(2)44DEa	lethal (2) 44DEa	46068	3987 // acetate-CoA ligase activity // inferred from sequence or structural similarity /// 3824 // catalytic activity // inferred from electronic annotation /// 8121 // ubiquinol-cytochrome-c reductase activity // inferred from electronic annotation /// 3987 // acetate-CoA ligase activity // inferred from sequence similarity	6631 // fatty acid metabolism // inferred from electronic annotation /// 8152 // metabolism // inferred from electronic annotation /// 6122 // mitochondrial electron transport, ubiquinol to cytochrome c // inferred from electronic annotation	---	IPR000873 // AMP-dependent synthetase and ligase // 1.3E-87 /// IPR000873 // AMP-dependent synthetase and ligase // 1.3E-87 /// IPR000873 // AMP-dependent synthetase and ligase // 1.3E-87
6945	148144_at	-0.501275	0.415668	-8.5234	1.11686e-09	2.0216e-08	11.6203	FBgn0035496	CG14990	CG14990	CG14990	38486	4252 // serine-type endopeptidase activity // non-traceable author statement /// 4295 // trypsin activity // inferred from electronic annotation /// 4252 // serine-type endopeptidase activity // inferred from electronic annotation	6508 // proteolysis // inferred from electronic annotation	---	IPR001254 // Peptidase S1, chymotrypsin // 1.2E-49
12169	153368_at	-0.6392	2.56617	-8.52278	1.11869e-09	2.02229e-08	11.6186	FBgn0026721	CG6953	fat-spondin	fat-spondin	36919	4867 // serine-type endopeptidase inhibitor activity // inferred from electronic annotation /// 5198 // structural molecule activity // inferred from electronic annotation	7010 // cytoskeleton organization and biogenesis // inferred from electronic annotation /// 7155 // cell adhesion // inferred from electronic annotation /// 7398 // ectoderm development // inferred from electronic annotation /// 7275 // development // inferred from electronic annotation	5576 // extracellular region // inferred from sequence or structural similarity /// 5576 // extracellular region // non-traceable author statement /// 5576 // extracellular region // inferred from sequence similarity	IPR002861 // Reeler region // 2.5E-5 /// IPR000884 // Thrombospondin, type I // 3.2E-12 /// IPR000884 // Thrombospondin, type I // 2.6E-12 /// IPR000884 // Thrombospondin, type I // 5.7E-8 /// IPR000884 // Thrombospondin, type I // 5.8E-13 /// IPR002223 // Pancreatic trypsin inhibitor (Kunitz) // 2.1E-27 /// IPR009465 // Spondin, N-terminal // 1.0E-126 /// IPR002861 // Reeler region // 4.0E-23 //…
3464	144663_at	-0.668938	3.01622	-8.51445	1.14326e-09	2.06405e-08	11.5966	FBgn0029971	CG18624	CG18624	CG18624	31697	3954 // NADH dehydrogenase activity // inferred from sequence or structural similarity /// 3954 // NADH dehydrogenase activity // inferred from sequence similarity	6120 // mitochondrial electron transport, NADH to ubiquinone // inferred from sequence or structural similarity /// 6120 // mitochondrial electron transport, NADH to ubiquinone // inferred from sequence similarity	5747 // respiratory chain complex I (sensu Eukaryota) // inferred from sequence or structural similarity /// 5747 // respiratory chain complex I (sensu Eukaryota) // inferred from sequence similarity	---
5557	146756_at	-0.67948	0.789298	-8.51379	1.14522e-09	2.06494e-08	11.5949	FBgn0033203	CG2070	CG2070	CG2070	35706	16491 // oxidoreductase activity // inferred from sequence or structural similarity /// 16491 // oxidoreductase activity // inferred from electronic annotation /// 16491 // oxidoreductase activity // inferred from sequence similarity	8152 // metabolism // inferred from electronic annotation	---	IPR002198 // Short-chain dehydrogenase/reductase SDR // 1.0E-41
4780	145979_at	-0.545848	1.95201	-8.50136	1.18296e-09	2.12478e-08	11.562	FBgn0031942	CG7203	CG7203	CG7203	34055	---	---	---	---
2581	143780_at	-0.758552	1.13877	-8.49827	1.19257e-09	2.13656e-08	11.5539	FBgn0015034	CG2062	Cyp4e1	Cytochrome P450-4e1	44632	4497 // monooxygenase activity // inferred from electronic annotation /// 16491 // oxidoreductase activity // inferred from electronic annotation /// 5506 // iron ion binding // inferred from electronic annotation /// 20037 // heme binding // inferred from electronic annotation /// 46872 // metal ion binding // inferred from electronic annotation	6118 // electron transport // inferred from electronic annotation	5792 // microsome // non-traceable author statement /// 16020 // membrane // non-traceable author statement /// 5783 // endoplasmic reticulum // inferred from electronic annotation /// 5792 // microsome // inferred from electronic annotation /// 16020 // membrane // inferred from electronic annotation	IPR001128 // Cytochrome P450 // 5.0E-90
11872	153071_at	-0.513873	3.19452	-8.48613	1.23098e-09	2.19695e-08	11.5218	FBgn0033544	CG7220	CG7220	CG7220	36129	4840 // ubiquitin conjugating enzyme activity // inferred from sequence or structural similarity /// 16874 // ligase activity // inferred from electronic annotation /// 5515 // protein binding // inferred from physical interaction /// 4842 // ubiquitin-protein ligase activity // inferred from electronic annotation /// 4840 // ubiquitin conjugating enzyme activity // inferred from sequence similar…	6464 // protein modification // inferred from electronic annotation /// 6508 // proteolysis // inferred from sequence or structural similarity /// 6512 // ubiquitin cycle // inferred from electronic annotation /// 6508 // proteolysis // inferred from sequence similarity	---	IPR000608 // Ubiquitin-conjugating enzymes // 8.7E-38 /// IPR000608 // Ubiquitin-conjugating enzymes // 3.5E-31
7826	149025_at	-0.417161	1.45423	-8.48033	1.24976e-09	2.2248e-08	11.5064	FBgn0036835	CG14075	CG14075	CG14075	40071	---	---	---	---
12080	153279_at	-0.699546	2.82729	-8.46512	1.30047e-09	2.30336e-08	11.4662	FBgn0021795	CG9035	Tap	Translocon-associated protein	45680	5048 // signal sequence binding // inferred from sequence or structural similarity /// 5515 // protein binding // inferred from physical interaction /// 5048 // signal sequence binding // inferred from sequence similarity	6621 // protein retention in ER // inferred from sequence or structural similarity /// 6621 // protein retention in ER // inferred from sequence similarity	5784 // translocon complex // inferred from sequence or structural similarity /// 5786 // signal recognition particle (sensu Eukaryota) // inferred from sequence or structural similarity /// 16021 // integral to membrane // inferred from electronic annotation /// 5783 // endoplasmic reticulum // inferred from electronic annotation /// 5784 // translocon complex // inferred from sequence similarit…	IPR008855 // Translocon-associated // 2.6E-112
5124	146323_at	-0.95287	4.45456	-8.44536	1.36947e-09	2.41945e-08	11.4138	FBgn0032494	CG5945	CG5945	CG5945	34729	5515 // protein binding // inferred from physical interaction	---	---	IPR004272 // Odorant binding protein // 1.9E-47
11253	152452_at	-0.959926	3.04893	-8.44322	1.37715e-09	2.4269e-08	11.4082	FBgn0020415	CG4475	Idgf2	Imaginal disc growth factor 2	34979	4568 // chitinase activity // inferred from sequence or structural similarity /// 8084 // imaginal disc growth factor activity // inferred from direct assay /// 16799 // hydrolase activity, hydrolyzing N-glycosyl compounds // inferred from electronic annotation /// 45735 // nutrient reservoir activity // inferred from electronic annotation /// 5515 // protein binding // inferred from physical int…	7165 // signal transduction // inferred from electronic annotation /// 7267 // cell-cell signaling // inferred from electronic annotation /// 7444 // imaginal disc development // inferred from direct assay /// 8152 // metabolism // inferred from electronic annotation /// 5975 // carbohydrate metabolism // inferred from electronic annotation /// 6032 // chitin catabolism // inferred from electroni…	5576 // extracellular region // inferred from direct assay /// 5576 // extracellular region // non-traceable author statement	IPR001223 // Glycoside hydrolase, family 18 // 7.8E-100
6057	147256_at	-0.523317	2.20282	-8.43065	1.42324e-09	2.50183e-08	11.3748	FBgn0034031	CG12963	CG12963	CG12963	36724	---	---	---	---
6072	147271_at	-0.375503	1.54398	-8.42415	1.4477e-09	2.53846e-08	11.3576	FBgn0034059	CG8320	CG8320	CG8320	36759	---	---	---	IPR008506 // Protein of unknown function DUF788 // 2.6E-86
2626	143825_at	-0.954029	3.90379	-8.40453	1.52411e-09	2.66909e-08	11.3055	FBgn0015584 /// FBgn0064259	CG8622	Acp53Ea /// DyakAcp53Ea	Accessory gland-specific peptide 53Ea /// Acp53Ea	36874	5179 // hormone activity // non-traceable author statement /// 5515 // protein binding // inferred from physical interaction	7321 // sperm displacement // non-traceable author statement /// 7582 // physiological process // non-traceable author statement /// 45297 // post-mating behavior // non-traceable author statement /// 46692 // sperm competition // traceable author statement /// 7610 // behavior // inferred from electronic annotation	5576 // extracellular region // non-traceable author statement	IPR009392 // Drosophila ACP53EA // 6.0E-106
3500	144699_at	-0.522183	2.79562	-8.40116	1.53764e-09	2.68607e-08	11.2966	FBgn0030038	CG1440	CG1440	CG1440	31776	4197 // cysteine-type endopeptidase activity // inferred from sequence or structural similarity /// 4197 // cysteine-type endopeptidase activity // inferred from electronic annotation /// 4197 // cysteine-type endopeptidase activity // inferred from sequence similarity	6508 // proteolysis // inferred from electronic annotation	---	IPR004134 // Peptidase C1B, bleomycin hydrolases // 1.0E-126
374	141573_at	-0.87483	3.86935	-8.38863	1.58905e-09	2.76899e-08	11.2633	FBgn0031362	CG17646	CG17646	CG17646	33354	166 // nucleotide binding // inferred from electronic annotation /// 5215 // transporter activity // inferred from sequence or structural similarity /// 5253 // anion channel activity // inferred from electronic annotation /// 5524 // ATP binding // inferred from electronic annotation /// 42626 // ATPase activity, coupled to transmembrane movement of substances // inferred from sequence or struct…	6629 // lipid metabolism // inferred from electronic annotation /// 6820 // anion transport // inferred from electronic annotation /// 6869 // lipid transport // inferred from electronic annotation	43190 // ATP-binding cassette (ABC) transporter complex // inferred from sequence or structural similarity /// 43190 // ATP-binding cassette (ABC) transporter complex // inferred from sequence similarity	IPR003439 // ABC transporter // 1.9E-48
8848	150047_at	-0.371172	0.339406	-8.38582	1.6008e-09	2.78253e-08	11.2558	FBgn0038477	CG5169	CG5169	CG5169	42064	4702 // receptor signaling protein serine/threonine kinase activity // non-traceable author statement /// 4713 // protein-tyrosine kinase activity // inferred from electronic annotation /// 5524 // ATP binding // inferred from electronic annotation /// 166 // nucleotide binding // inferred from electronic annotation /// 4672 // protein kinase activity // inferred from electronic annotation /// 46…	6468 // protein amino acid phosphorylation // non-traceable author statement /// 6917 // induction of apoptosis // inferred from electronic annotation /// 7015 // actin filament organization // inferred from mutant phenotype /// 7242 // intracellular signaling cascade // inferred from electronic annotation /// 6468 // protein amino acid phosphorylation // inferred from electronic annotation	---	IPR000719 // Protein kinase // 8.0E-97
1482	142681_at	-0.811013	2.33027	-8.38141	1.61946e-09	2.808e-08	11.2441	FBgn0024315	CG8098	Picot	Picot	36865	5316 // high affinity inorganic phosphate:sodium symporter activity // inferred from sequence or structural similarity /// 5316 // high affinity inorganic phosphate:sodium symporter activity // non-traceable author statement /// 15114 // phosphate transporter activity // inferred from electronic annotation /// 5515 // protein binding // inferred from physical interaction /// 5215 // transporter a…	6796 // phosphate metabolism // inferred from electronic annotation /// 6812 // cation transport // inferred from electronic annotation /// 6817 // phosphate transport // non-traceable author statement /// 6858 // extracellular transport // inferred from electronic annotation /// 6810 // transport // inferred from electronic annotation /// 6811 // ion transport // inferred from electronic annotat…	16021 // integral to membrane // non-traceable author statement /// 16020 // membrane // inferred from electronic annotation /// 16021 // integral to membrane // inferred from electronic annotation	---
13475	154674_at	-0.503086	1.22828	-8.3427	1.7929e-09	3.09724e-08	11.1411	FBgn0028373	CG1448	inx3	innexin 3	44266	15286 // innexin channel activity // non-traceable author statement /// 5515 // protein binding // inferred from physical interaction /// 15286 // innexin channel activity // inferred from expression pattern	7165 // signal transduction // inferred from electronic annotation	5921 // gap junction // inferred from sequence or structural similarity /// 5921 // gap junction // non-traceable author statement /// 16021 // integral to membrane // non-traceable author statement /// 5921 // gap junction // inferred from expression pattern /// 5921 // gap junction // inferred from electronic annotation /// 16020 // membrane // inferred from electronic annotation /// 16021 // i…	IPR000990 // Innexin // 1.2E-26 /// IPR000990 // Innexin // 8.6E-37
4453	145652_at	-0.465912	3.05729	-8.34093	1.80125e-09	3.10782e-08	11.1364	FBgn0031439	CG15394	CG15394	CG15394	33446	---	---	---	---
1846	143045_at	-0.498108	0.843236	-8.3188	1.90933e-09	3.29024e-08	11.0774	FBgn0038098	CG7381	CG7381	CG7381	41589	---	---	16020 // membrane // inferred from electronic annotation /// 16021 // integral to membrane // inferred from electronic annotation	---
11342	152541_at	-0.46267	2.60336	-8.31774	1.91467e-09	3.2954e-08	11.0746	FBgn0032242	CG5355	CG5355	CG5355	34421	4287 // prolyl oligopeptidase activity // inferred from sequence or structural similarity /// 5515 // protein binding // inferred from physical interaction /// 3824 // catalytic activity // inferred from electronic annotation /// 4252 // serine-type endopeptidase activity // inferred from electronic annotation /// 4287 // prolyl oligopeptidase activity // inferred from electronic annotation /// 8…	6508 // proteolysis // inferred from electronic annotation	---	IPR001375 // Peptidase S9, prolyl oligopeptidase active site region // 2.7E-36 /// IPR004106 // Peptidase S9A, prolyl oligopeptidase, N-terminal beta-propeller domain // 1.0E-126
13532	154731_at	-0.815841	1.4507	-8.31153	1.94623e-09	3.34561e-08	11.058	FBgn0028646	CG2139	aralar1	aralar1	43616	5386 // carrier activity // inferred from sequence or structural similarity /// 5386 // carrier activity // non-traceable author statement /// 5509 // calcium ion binding // inferred from sequence or structural similarity /// 5509 // calcium ion binding // non-traceable author statement /// 5515 // protein binding // inferred from physical interaction /// 5509 // calcium ion binding // inferred f…	6629 // lipid metabolism // inferred from electronic annotation /// 6810 // transport // non-traceable author statement /// 6839 // mitochondrial transport // inferred from sequence or structural similarity /// 6869 // lipid transport // inferred from electronic annotation /// 6810 // transport // inferred from electronic annotation /// 6839 // mitochondrial transport // inferred from sequence si…	5740 // mitochondrial envelope // inferred from sequence or structural similarity /// 5743 // mitochondrial inner membrane // inferred from sequence or structural similarity /// 5743 // mitochondrial inner membrane // non-traceable author statement /// 16021 // integral to membrane // non-traceable author statement /// 5739 // mitochondrion // inferred from electronic annotation /// 5743 // mitoc…	IPR001993 // Mitochondrial substrate carrier // 1.7E-34 /// IPR001993 // Mitochondrial substrate carrier // 1.5E-24 /// IPR001993 // Mitochondrial substrate carrier // 2.7E-37 /// IPR002048 // Calcium-binding EF-hand // 0.054 /// IPR002048 // Calcium-binding EF-hand // 3.8E-5 /// IPR002048 // Calcium-binding EF-hand // 0.4 /// IPR001993 // Mitochondrial substrate carrier // 1.7E-34 /// IPR001993 …
11341	152540_at	-0.775891	-0.243591	-8.30987	1.95475e-09	3.35613e-08	11.0536	FBgn0031248	CG11912	CG11912	CG11912	33205	4252 // serine-type endopeptidase activity // inferred from sequence or structural similarity /// 4252 // serine-type endopeptidase activity // non-traceable author statement /// 4263 // chymotrypsin activity // inferred from electronic annotation /// 4295 // trypsin activity // inferred from electronic annotation /// 4252 // serine-type endopeptidase activity // inferred from electronic annotati…	6508 // proteolysis // non-traceable author statement /// 6508 // proteolysis // inferred from electronic annotation	---	IPR001254 // Peptidase S1, chymotrypsin // 5.3E-55
2847	144046_at	-0.601628	1.34319	-8.28486	2.08804e-09	3.57621e-08	10.9869	FBgn0024995	CG2680	CG2680	CG2680	31257	3869 // 4-nitrophenylphosphatase activity // inferred from sequence or structural similarity /// 3824 // catalytic activity // inferred from electronic annotation /// 16787 // hydrolase activity // inferred from electronic annotation /// 3869 // 4-nitrophenylphosphatase activity // inferred from sequence similarity	8152 // metabolism // inferred from electronic annotation	---	IPR005834 // Haloacid dehalogenase-like hydrolase // 1.3E-13
10753	151952_at	-0.452845	1.73957	-8.27075	2.16723e-09	3.7051e-08	10.9492	FBgn0037818	CG6465	CG6465	CG6465	41274	4046 // aminoacylase activity // inferred from sequence or structural similarity /// 8237 // metallopeptidase activity // inferred from electronic annotation /// 4046 // aminoacylase activity // inferred from electronic annotation /// 16787 // hydrolase activity // inferred from electronic annotation /// 46983 // protein dimerization activity // inferred from electronic annotation /// 4046 // ami…	6508 // proteolysis // inferred from electronic annotation /// 8652 // amino acid biosynthesis // inferred from electronic annotation /// 6520 // amino acid metabolism // inferred from electronic annotation	5737 // cytoplasm // inferred from electronic annotation	IPR002933 // Peptidase M20 // 1.1E-91
9177	150376_at	-0.474065	0.330067	-8.24029	2.34882e-09	3.99357e-08	10.8678	FBgn0038986	CG5278	CG5278	CG5278	42658	8415 // acyltransferase activity // inferred from electronic annotation /// 16740 // transferase activity // inferred from electronic annotation	6629 // lipid metabolism // inferred from electronic annotation /// 6631 // fatty acid metabolism // inferred from electronic annotation	16021 // integral to membrane // inferred from electronic annotation	IPR002076 // GNS1/SUR4 membrane protein // 3.1E-8 /// IPR002076 // GNS1/SUR4 membrane protein // 5.7E-8
11137	152336_at	-0.655769	1.72485	-8.21469	2.51338e-09	4.24246e-08	10.7992	FBgn0000477	CG7780	DNaseII	Deoxyribonuclease II	48228	3676 // nucleic acid binding // inferred from electronic annotation /// 4531 // deoxyribonuclease II activity // inferred from sequence or structural similarity /// 4531 // deoxyribonuclease II activity // non-traceable author statement /// 4531 // deoxyribonuclease II activity // traceable author statement /// 4531 // deoxyribonuclease II activity // inferred from electronic annotation /// 4531 …	6308 // DNA catabolism // inferred from electronic annotation /// 6308 // DNA catabolism // traceable author statement /// 8632 // apoptotic program // inferred from electronic annotation /// 6259 // DNA metabolism // inferred from electronic annotation	---	IPR004947 // Deoxyribonuclease II // 1.0E-126
5886	147085_at	-0.791898	0.0874899	-8.21191	2.53198e-09	4.26871e-08	10.7918	FBgn0050042	CG30042	CG30042	CG30042	36345	---	---	---	IPR000618 // Insect cuticle protein // 1.5E-26
1597	142796_at	-0.412122	2.3236	-8.20612	2.5711e-09	4.32427e-08	10.7763	FBgn0034142	CG8306	CG8306	CG8306	36857	16491 // oxidoreductase activity // inferred from electronic annotation	---	---	IPR004262 // Male sterility protein // 2.2E-97
111	141310_at	-0.948293	1.72116	-8.20161	2.60197e-09	4.3657e-08	10.7642	FBgn0039760	CG9682	CG9682	CG9682	43602	---	---	---	IPR004238 // Late embryogenesis abundant protein // 7.1E-9 /// IPR004238 // Late embryogenesis abundant protein // 2.1E-10
6628	147827_at	-0.476419	0.0945688	-8.19871	2.62204e-09	4.39412e-08	10.7564	FBgn0053519	CG33519	CG33519	CG33519	3346201	5524 // ATP binding // inferred from electronic annotation /// 4672 // protein kinase activity // inferred from electronic annotation	6468 // protein amino acid phosphorylation // inferred from electronic annotation	---	IPR003961 // Fibronectin, type III // 2.8E-8 /// IPR003961 // Fibronectin, type III // 9.2E-14 /// IPR000719 // Protein kinase // 1.9E-51 /// IPR000719 // Protein kinase // 9.3E-42 /// IPR007110 // Immunoglobulin-like // 3.2 /// IPR007110 // Immunoglobulin-like // 7.8E-5 /// IPR007110 // Immunoglobulin-like // 2.2E-5 /// IPR007110 // Immunoglobulin-like // 0.1 /// IPR007110 // Immunoglobulin-like…
11117	152316_at	-0.299572	0.379275	-8.19203	2.6689e-09	4.4673e-08	10.7385	FBgn0037023	CG3698	CG3698	CG3698	40298	---	---	---	---
12665	153864_at	-0.519653	3.50446	-8.18436	2.72367e-09	4.54811e-08	10.7179	FBgn0039594	CG9990	CG9990	CG9990	43391	166 // nucleotide binding // inferred from electronic annotation /// 5215 // transporter activity // inferred from sequence or structural similarity /// 5524 // ATP binding // inferred from electronic annotation /// 42626 // ATPase activity, coupled to transmembrane movement of substances // inferred from sequence or structural similarity /// 42626 // ATPase activity, coupled to transmembrane mov…	6810 // transport // inferred from electronic annotation	16020 // membrane // inferred from electronic annotation /// 43190 // ATP-binding cassette (ABC) transporter complex // inferred from sequence or structural similarity /// 43190 // ATP-binding cassette (ABC) transporter complex // inferred from sequence similarity	IPR003439 // ABC transporter // 8.3E-51 /// IPR003439 // ABC transporter // 8.3E-51
574	141773_at	-0.451908	1.30863	-8.18389	2.7271e-09	4.54841e-08	10.7167	FBgn0035039	CG3608	CG3608	CG3608	37938	4672 // protein kinase activity // non-traceable author statement /// 5215 // transporter activity // inferred from electronic annotation /// 5524 // ATP binding // inferred from electronic annotation /// 166 // nucleotide binding // inferred from electronic annotation /// 4672 // protein kinase activity // inferred from electronic annotation /// 16301 // kinase activity // inferred from electron…	6468 // protein amino acid phosphorylation // inferred from electronic annotation /// 6732 // coenzyme metabolism // inferred from electronic annotation /// 51189 // prosthetic group metabolism // inferred from electronic annotation	---	IPR004147 // ABC1 protein // 2.0E-62
6353	147552_at	-0.51118	0.471224	-8.17745	2.77405e-09	4.61025e-08	10.6994	---	CG13430 /// CG18065	---	---	---	4263 // chymotrypsin activity // inferred from electronic annotation /// 4295 // trypsin activity // inferred from electronic annotation /// 4295 // trypsin activity // inferred from sequence or structural similarity /// 4295 // trypsin activity // non-traceable author statement /// 4252 // serine-type endopeptidase activity // inferred from electronic annotation /// 8233 // peptidase activity //…	6508 // proteolysis // inferred from electronic annotation /// 6508 // proteolysis // non-traceable author statement	---	---
3501	144700_at	-0.68591	2.2818	-8.17145	2.81856e-09	4.67867e-08	10.6833	FBgn0030040	CG15347	CG15347	CG15347	31779	---	---	---	IPR008472 // Protein of unknown function DUF753 // 4.6E-77
9176	150375_at	-0.74199	1.11284	-8.16559	2.86269e-09	4.73954e-08	10.6676	FBgn0038983	CG5326	CG5326	CG5326	42655	8415 // acyltransferase activity // inferred from electronic annotation /// 16740 // transferase activity // inferred from electronic annotation	6629 // lipid metabolism // inferred from electronic annotation /// 6631 // fatty acid metabolism // inferred from electronic annotation	16021 // integral to membrane // inferred from electronic annotation	IPR002076 // GNS1/SUR4 membrane protein // 1.0E-6 /// IPR002076 // GNS1/SUR4 membrane protein // 1.8E-8
3644	144843_at	-0.317281	0.594073	-8.15761	2.92392e-09	4.82498e-08	10.6462	FBgn0030259	CG1545	CG1545	CG1545	32036	---	---	---	---
11734	152933_at	-0.771707	2.84731	-8.13514	3.10375e-09	5.0858e-08	10.5858	FBgn0037090	CG7529	CG7529	CG7529	40381	4091 // carboxylesterase activity // inferred from sequence or structural similarity /// 3824 // catalytic activity // inferred from electronic annotation /// 4759 // serine esterase activity // inferred from electronic annotation /// 4091 // carboxylesterase activity // inferred from sequence similarity	---	---	IPR002018 // Carboxylesterase, type B // 1.0E-126
273	141472_at	-1.06312	2.15635	-8.12905	3.15439e-09	5.16274e-08	10.5694	FBgn0001114	CG9280	Glt	Glutactin	34193	3824 // catalytic activity // inferred from electronic annotation /// 5509 // calcium ion binding // non-traceable author statement /// 5509 // calcium ion binding // inferred from electronic annotation	---	5604 // basement membrane // inferred from direct assay /// 5604 // basement membrane // non-traceable author statement	IPR002018 // Carboxylesterase, type B // 1.0E-126
2576	143775_at	-0.910186	0.865695	-8.12614	3.17884e-09	5.18459e-08	10.5616	FBgn0015001	CG7754	Try	Trypsin	36223	4263 // chymotrypsin activity // inferred from electronic annotation /// 4295 // trypsin activity // inferred from sequence or structural similarity /// 4295 // trypsin activity // non-traceable author statement /// 4252 // serine-type endopeptidase activity // inferred from electronic annotation /// 8233 // peptidase activity // inferred from electronic annotation /// 16787 // hydrolase activity…	6508 // proteolysis // non-traceable author statement /// 6508 // proteolysis // inferred from electronic annotation	5576 // extracellular region // non-traceable author statement	IPR001254 // Peptidase S1, chymotrypsin // 3.8E-91
3692	144891_at	-0.50524	-0.0880243	-8.12662	3.17482e-09	5.18459e-08	10.5629	FBgn0030326	CG2444	CG2444	CG2444	32121	---	---	---	---
11400	152599_at	-0.610729	1.33885	-8.11253	3.29602e-09	5.35699e-08	10.525	FBgn0013988	CG18255	Strn-Mlck	Stretchin-Mlck	36753	4674 // protein serine/threonine kinase activity // non-traceable author statement /// 4685 // calcium- and calmodulin-dependent protein kinase activity // inferred from direct assay /// 4687 // myosin light chain kinase activity // inferred from direct assay /// 4687 // myosin light chain kinase activity // inferred from sequence or structural similarity /// 5021 // vascular endothelial growth f…	910 // cytokinesis // inferred from electronic annotation /// 6468 // protein amino acid phosphorylation // inferred from sequence or structural similarity /// 6468 // protein amino acid phosphorylation // non-traceable author statement /// 7059 // chromosome segregation // inferred from electronic annotation /// 7067 // mitosis // inferred from electronic annotation /// 7498 // mesoderm developm…	16020 // membrane // inferred from electronic annotation	IPR007110 // Immunoglobulin-like // 9.5E-8 /// IPR003961 // Fibronectin, type III // 5.9E-8 /// IPR003961 // Fibronectin, type III // 2.2E-12 /// IPR000719 // Protein kinase // 1.8E-80 /// IPR007110 // Immunoglobulin-like // 1.1E-6 /// IPR007110 // Immunoglobulin-like // 0.04 /// IPR007110 // Immunoglobulin-like // 0.02 /// IPR007110 // Immunoglobulin-like // 1.3 /// IPR007110 // Immunoglobulin-l…
9075	150274_at	-0.692014	2.26459	-8.09261	3.47547e-09	5.6421e-08	10.4713	FBgn0038820	CG4000	CG4000	CG4000	42451	---	---	---	---
1044	142243_at	-0.623024	4.23691	-8.07732	3.61988e-09	5.86295e-08	10.4301	FBgn0032511	CG9306	CG9306	CG9306	34747	3954 // NADH dehydrogenase activity // inferred from sequence or structural similarity /// 8137 // NADH dehydrogenase (ubiquinone) activity // inferred from sequence or structural similarity /// 5515 // protein binding // inferred from physical interaction /// 3954 // NADH dehydrogenase activity // inferred from sequence similarity /// 8137 // NADH dehydrogenase (ubiquinone) activity // inferred …	6120 // mitochondrial electron transport, NADH to ubiquinone // inferred from sequence or structural similarity /// 6120 // mitochondrial electron transport, NADH to ubiquinone // inferred from sequence similarity	5747 // respiratory chain complex I (sensu Eukaryota) // inferred from sequence or structural similarity /// 5747 // respiratory chain complex I (sensu Eukaryota) // inferred from sequence similarity	IPR008011 // Complex 1 LYR protein // 1.2E-21
10351	151550_s_at	-0.513933	2.02231	-8.07676	3.62526e-09	5.86488e-08	10.4286	FBgn0051017	CG31017	PH4NE3	prolyl-4-hydroxylase-alpha NE3	326114	4656 // procollagen-proline 4-dioxygenase activity // inferred from sequence or structural similarity /// 16706 // oxidoreductase activity, acting on paired donors, with incorporation or reduction of molecular oxygen, 2-oxoglutarate as one donor, and incorporation of one atom each of oxygen into both donors // inferred from electronic annotation /// 4656 // procollagen-proline 4-dioxygenase activ…	6464 // protein modification // inferred from electronic annotation /// 19538 // protein metabolism // inferred from electronic annotation	16222 // procollagen-proline, 2-oxoglutarate-4-dioxygenase complex // Unknown /// 16222 // procollagen-proline, 2-oxoglutarate-4-dioxygenase complex // inferred from curator	IPR005123 // 2OG-Fe(II) oxygenase superfamily // 1.7E-7
11751	152950_at	-0.704453	1.37417	-8.05525	3.8392e-09	6.18243e-08	10.3706	FBgn0029769	CG3239	CG3239	CG3239	31464	4245 // neprilysin activity // inferred from electronic annotation /// 8270 // zinc ion binding // inferred from electronic annotation /// 16511 // endothelin-converting enzyme activity // inferred from sequence or structural similarity /// 8233 // peptidase activity // inferred from electronic annotation /// 8237 // metallopeptidase activity // inferred from electronic annotation /// 16787 // hy…	6508 // proteolysis // inferred from electronic annotation	16020 // membrane // inferred from electronic annotation	IPR000718 // Peptidase M13, neprilysin // 3.1E-10 /// IPR000718 // Peptidase M13, neprilysin // 3.1E-10
1850	143049_at	-0.444983	1.02334	-8.04849	3.90908e-09	6.28774e-08	10.3524	FBgn0050387	CG30387	CG30387	CG30387	37433	5057 // receptor signaling protein activity // inferred from electronic annotation /// 5102 // receptor binding // inferred from electronic annotation	---	---	IPR002110 // Ankyrin // 0.0035 /// IPR002110 // Ankyrin // 4.2E-10 /// IPR002110 // Ankyrin // 6.3E-10 /// IPR002110 // Ankyrin // 1.1E-5 /// IPR002110 // Ankyrin // 2.7E-7 /// IPR002110 // Ankyrin // 1.8E-6 /// IPR002110 // Ankyrin // 1.8E-7 /// IPR002110 // Ankyrin // 7.8E-6 /// IPR002110 // Ankyrin // 3.4E-4 /// IPR002110 // Ankyrin // 1.4E-8 /// IPR002110 // Ankyrin // 0.0095 /// IPR002110 //…
9689	150888_at	-0.528196	0.900561	-8.04604	3.93473e-09	6.32174e-08	10.3458	FBgn0039769	CG15534	CG15534	CG15534	43613	4767 // sphingomyelin phosphodiesterase activity // inferred from sequence or structural similarity /// 4767 // sphingomyelin phosphodiesterase activity // inferred from electronic annotation /// 16787 // hydrolase activity // inferred from electronic annotation /// 4767 // sphingomyelin phosphodiesterase activity // inferred from sequence similarity	6684 // sphingomyelin metabolism // inferred from sequence or structural similarity /// 6685 // sphingomyelin catabolism // inferred from electronic annotation /// 6684 // sphingomyelin metabolism // inferred from sequence similarity	---	IPR004843 // Metallo-phosphoesterase // 3.9E-16
8336	149535_at	-0.450275	1.65274	-8.04502	3.9454e-09	6.33163e-08	10.343	FBgn0037650	CG11977	CG11977	CG11977	41076	---	---	5576 // extracellular region // inferred from electronic annotation	IPR001283 // Allergen V5/Tpx-1 related // 3.0E-19
8201	149400_at	-0.577969	0.412452	-8.01945	4.22416e-09	6.74038e-08	10.274	FBgn0037441	CG10284	CG10284	CG10284	40788	4867 // serine-type endopeptidase inhibitor activity // inferred from electronic annotation	---	5576 // extracellular region // inferred from electronic annotation	IPR002223 // Pancreatic trypsin inhibitor (Kunitz) // 1.5E-13 /// IPR001283 // Allergen V5/Tpx-1 related // 1.3E-33
11509	152708_at	-0.68474	1.4757	-8.00895	4.34441e-09	6.90864e-08	10.2456	FBgn0029167	CG7002	Hml	Hemolectin	39529	5198 // structural molecule activity // inferred from electronic annotation /// 5529 // sugar binding // inferred from sequence or structural similarity /// 8061 // chitin binding // inferred from electronic annotation /// 5529 // sugar binding // inferred from sequence similarity	6030 // chitin metabolism // inferred from electronic annotation /// 6952 // defense response // non-traceable author statement /// 7155 // cell adhesion // inferred from electronic annotation /// 7599 // hemostasis // inferred from mutant phenotype /// 7599 // hemostasis // inferred from sequence or structural similarity /// 7599 // hemostasis // inferred from sequence similarity	5576 // extracellular region // inferred from sequence or structural similarity /// 5576 // extracellular region // inferred from electronic annotation /// 5576 // extracellular region // inferred from sequence similarity	IPR006209 // EGF-like domain // 4.7E-6 /// IPR002919 // Trypsin inhibitor-like, cysteine-rich TIL region // 8.9E-14 /// IPR002919 // Trypsin inhibitor-like, cysteine-rich TIL region // 1.4E-7 /// IPR002919 // Trypsin inhibitor-like, cysteine-rich TIL region // 1.9E-9 /// IPR000421 // Coagulation factor 5/8 type C domain (FA58C) // 6.0E-58 /// IPR000421 // Coagulation factor 5/8 type C domain (FA5…
7764	148963_at	-1.11116	3.66247	-7.99161	4.55051e-09	7.20006e-08	10.1987	FBgn0023197	CG6298	Jon74E	Jonah 74E	39959	4263 // chymotrypsin activity // inferred from sequence or structural similarity /// 4263 // chymotrypsin activity // non-traceable author statement /// 4295 // trypsin activity // inferred from electronic annotation /// 4263 // chymotrypsin activity // inferred from sequence similarity	6508 // proteolysis // non-traceable author statement	---	IPR001254 // Peptidase S1, chymotrypsin // 9.2E-56 /// IPR001254 // Peptidase S1, chymotrypsin // 1.5E-43
11263	152462_at	-0.537981	1.6051	-7.99138	4.55336e-09	7.20006e-08	10.1981	FBgn0031865	CG10806	CG10806	CG10806	33961	15299 // solute:hydrogen antiporter activity // inferred from electronic annotation /// 15385 // sodium:hydrogen antiporter activity // inferred from sequence or structural similarity /// 15385 // sodium:hydrogen antiporter activity // inferred from sequence similarity	6885 // regulation of pH // inferred from electronic annotation /// 6810 // transport // inferred from electronic annotation	16021 // integral to membrane // inferred from electronic annotation	IPR006153 // Sodium/hydrogen exchanger // 2.1E-13 /// IPR006153 // Sodium/hydrogen exchanger // 2.1E-13
11839	153038_at	-0.424991	1.20673	-7.98793	4.5955e-09	7.25033e-08	10.1888	FBgn0003390	CG3135	shf	shifted	31617	4713 // protein-tyrosine kinase activity // inferred from electronic annotation /// 4872 // receptor activity // inferred from electronic annotation /// 5102 // receptor binding // inferred from electronic annotation /// 5515 // protein binding // inferred from physical interaction	7154 // cell communication // inferred from electronic annotation /// 7165 // signal transduction // inferred from electronic annotation /// 7166 // cell surface receptor linked signal transduction // inferred from electronic annotation /// 7224 // smoothened signaling pathway // inferred from genetic interaction /// 7224 // smoothened signaling pathway // inferred from mutant phenotype /// 7267 …	5576 // extracellular region // inferred from direct assay /// 5578 // extracellular matrix (sensu Metazoa) // inferred from direct assay /// 5578 // extracellular matrix (sensu Metazoa) // inferred from electronic annotation	IPR006209 // EGF-like domain // 3.8E-4 /// IPR006209 // EGF-like domain // 7.1E-6 /// IPR003306 // WIF domain // 2.8E-85
12172	153371_at	-0.507033	2.33869	-7.98562	4.62407e-09	7.27902e-08	10.1825	FBgn0023540	CG3630	CG3630	CG3630	31189	5515 // protein binding // inferred from physical interaction	---	---	---
1887	143086_at	-0.31859	0.855424	-7.97859	4.71177e-09	7.4072e-08	10.1635	FBgn0000206	CG8285	boss	bride of sevenless	43146	4888 // transmembrane receptor activity // inferred from sequence or structural similarity /// 4930 // G-protein coupled receptor activity // inferred from sequence or structural similarity /// 5102 // receptor binding // non-traceable author statement /// 5118 // sevenless binding // inferred from genetic interaction /// 5118 // sevenless binding // inferred from physical interaction /// 5118 //…	7165 // signal transduction // inferred from sequence or structural similarity /// 7456 // eye development (sensu Endopterygota) // non-traceable author statement /// 7465 // R7 cell fate commitment // traceable author statement /// 7601 // visual perception // inferred from electronic annotation /// 45466 // R7 cell differentiation // non-traceable author statement /// 45467 // R7 development //…	5886 // plasma membrane // non-traceable author statement /// 5902 // microvillus // inferred from direct assay /// 16021 // integral to membrane // inferred from sequence or structural similarity /// 16021 // integral to membrane // non-traceable author statement /// 16020 // membrane // inferred from electronic annotation /// 16021 // integral to membrane // inferred from sequence similarity	---
10831	152030_at	-0.464235	1.26256	-7.97825	4.71607e-09	7.4072e-08	10.1626	---	CG18749 /// CG33722	---	---	---	4656 // procollagen-proline 4-dioxygenase activity // inferred from sequence or structural similarity /// 16706 // oxidoreductase activity, acting on paired donors, with incorporation or reduction of molecular oxygen, 2-oxoglutarate as one donor, and incorporation of one atom each of oxygen into both donors // inferred from electronic annotation /// 5515 // protein binding // inferred from physic…	18401 // peptidyl-proline hydroxylation to 4-hydroxy-L-proline // inferred from sequence or structural similarity /// 19538 // protein metabolism // inferred from electronic annotation /// 7165 // signal transduction // inferred from electronic annotation	16222 // procollagen-proline, 2-oxoglutarate-4-dioxygenase complex // Unknown	---
11888	153087_at	-0.489913	2.7081	-7.97551	4.75085e-09	7.44512e-08	10.1551	FBgn0034479	CG8654	CG8654	CG8654	37275	8513 // organic cation porter activity // inferred from sequence or structural similarity /// 5215 // transporter activity // inferred from electronic annotation /// 8513 // organic cation porter activity // inferred from sequence similarity	6812 // cation transport // inferred from electronic annotation /// 6820 // anion transport // inferred from electronic annotation /// 6858 // extracellular transport // inferred from electronic annotation /// 6810 // transport // inferred from electronic annotation	16021 // integral to membrane // inferred from electronic annotation /// 16020 // membrane // inferred from electronic annotation	IPR005828 // General substrate transporter // 9.8E-25
9680	150879_at	-0.673716	2.40793	-7.96202	4.92554e-09	7.71026e-08	10.1186	FBgn0039755	CG15531	CG15531	CG15531	43592	4768 // stearoyl-CoA 9-desaturase activity // inferred from sequence or structural similarity /// 5506 // iron ion binding // inferred from electronic annotation /// 4768 // stearoyl-CoA 9-desaturase activity // inferred from electronic annotation /// 16491 // oxidoreductase activity // inferred from electronic annotation /// 16717 // oxidoreductase activity, acting on paired donors, with oxidati…	6631 // fatty acid metabolism // inferred from electronic annotation /// 6633 // fatty acid biosynthesis // inferred from electronic annotation /// 8610 // lipid biosynthesis // inferred from electronic annotation	5783 // endoplasmic reticulum // inferred from electronic annotation /// 16020 // membrane // inferred from electronic annotation /// 16021 // integral to membrane // inferred from electronic annotation	IPR005804 // Fatty acid desaturase // 5.4E-23
12175	153374_at	-0.688787	2.48064	-7.96032	4.94811e-09	7.73695e-08	10.114	FBgn0004646	CG3039	ogre	optic ganglion reduced	45382	5243 // gap-junction forming channel activity // inferred from electronic annotation /// 5515 // protein binding // inferred from physical interaction /// 15286 // innexin channel activity // inferred from expression pattern	7165 // signal transduction // inferred from electronic annotation /// 7399 // nervous system development // non-traceable author statement /// 7602 // phototransduction // inferred from mutant phenotype /// 7632 // visual behavior // inferred from sequence or structural similarity /// 7632 // visual behavior // inferred from sequence similarity	5921 // gap junction // non-traceable author statement /// 16021 // integral to membrane // non-traceable author statement /// 5921 // gap junction // inferred from expression pattern /// 5921 // gap junction // inferred from electronic annotation /// 16020 // membrane // inferred from electronic annotation /// 16021 // integral to membrane // inferred from electronic annotation	IPR000990 // Innexin // 1.0E-126
5568	146767_at	-0.63716	1.88033	-7.95954	4.95841e-09	7.7444e-08	10.1119	FBgn0033221	CG12825	CG12825	CG12825	35726	---	---	---	---
7090	148289_at	-0.432785	1.19809	-7.95517	5.01675e-09	7.82681e-08	10.1001	FBgn0035718	CG14820	CG14820	CG14820	38754	4181 // metallocarboxypeptidase activity // inferred from sequence or structural similarity /// 4182 // carboxypeptidase A activity // inferred from electronic annotation /// 5515 // protein binding // inferred from physical interaction /// 4180 // carboxypeptidase activity // inferred from electronic annotation /// 4181 // metallocarboxypeptidase activity // inferred from sequence similarity	6508 // proteolysis // inferred from electronic annotation	---	IPR000834 // Peptidase M14, carboxypeptidase A // 2.0E-74 /// IPR003146 // Peptidase M14A, carboxypeptidase activation peptide // 1.3E-5
3630	144829_at	-0.471387	2.61325	-7.94866	5.10507e-09	7.94689e-08	10.0824	FBgn0030237	CG15209	CG15209	CG15209	32011	5515 // protein binding // inferred from physical interaction	---	---	---
4179	145378_at	-0.365054	0.0230805	-7.94682	5.13024e-09	7.97721e-08	10.0774	FBgn0031034	CG14205	CG14205	CG14205	32952	16747 // transferase activity, transferring groups other than amino-acyl groups // inferred from electronic annotation	---	---	IPR002656 // Acyltransferase 3 family // 3.0E-7
5132	146331_at	-0.732312	5.67638	-7.92824	5.39234e-09	8.36619e-08	10.0271	FBgn0032505	CG16826	CG16826	CG16826	34741	---	---	---	---
7570	148769_at	-0.750308	1.01933	-7.91654	5.56439e-09	8.62358e-08	9.99529	FBgn0036454	CG17839	CG17839	CG17839	39616	---	---	---	IPR003961 // Fibronectin, type III // 2.9E-12 /// IPR003961 // Fibronectin, type III // 5.5E-10 /// IPR003961 // Fibronectin, type III // 3.1E-9 /// IPR007110 // Immunoglobulin-like // 1.1E-5 /// IPR007110 // Immunoglobulin-like // 3.3E-7 /// IPR003961 // Fibronectin, type III // 4.7E-5 /// IPR003961 // Fibronectin, type III // 3.1E-9 /// IPR002602 // Protein of unknown function DB // 6.4E-8 /// …
11208	152407_at	-0.830549	3.89983	-7.91501	5.58727e-09	8.64946e-08	9.99115	FBgn0033246	CG11198	CG11198	CG11198	35761	3989 // acetyl-CoA carboxylase activity // inferred from sequence or structural similarity /// 4075 // biotin carboxylase activity // inferred from electronic annotation /// 5524 // ATP binding // inferred from electronic annotation /// 9374 // biotin binding // inferred from electronic annotation /// 3824 // catalytic activity // inferred from electronic annotation /// 16874 // ligase activity /…	6633 // fatty acid biosynthesis // inferred from electronic annotation /// 8152 // metabolism // inferred from electronic annotation	9343 // biotin carboxylase complex // inferred from electronic annotation	IPR005482 // Biotin carboxylase, C-terminal // 4.5E-53 /// IPR005481 // Carbamoyl-phosphate synthetase large chain, N-terminal // 1.7E-57 /// IPR005479 // Carbamoyl-phosphate synthase L chain, ATP-binding // 2.8E-122 /// IPR000022 // Carboxyl transferase // 1.0E-126 /// IPR000089 // Biotin/lipoyl attachment // 7.1E-19 /// IPR005482 // Biotin carboxylase, C-terminal // 4.5E-53 /// IPR005481 // Car…
10756	151955_at	-0.485412	1.86632	-7.89998	5.81733e-09	8.98576e-08	9.95034	FBgn0000165	CG5779	Bc	Black cells	37044	4503 // monophenol monooxygenase activity // inferred from sequence or structural similarity /// 4503 // monophenol monooxygenase activity // non-traceable author statement /// 4503 // monophenol monooxygenase activity // traceable author statement /// 5344 // oxygen transporter activity // inferred from electronic annotation /// 4503 // monophenol monooxygenase activity // inferred from electron…	6810 // transport // inferred from electronic annotation /// 6952 // defense response // non-traceable author statement /// 9611 // response to wounding // inferred from mutant phenotype /// 9613 // response to pest, pathogen or parasite // inferred from mutant phenotype /// 35006 // melanization defense response // inferred from genetic interaction /// 35006 // melanization defense response // i…	---	IPR000896 // Arthropod hemocyanin/insect LSP // 2.2E-74 /// IPR005204 // Hemocyanin, N-terminal // 1.5E-6 /// IPR005203 // Hemocyanin, C-terminal // 8.0E-52
1679	142878_at	-0.4851	2.09014	-7.89633	5.87459e-09	9.0642e-08	9.94044	FBgn0030932	CG6461	CG6461	CG6461	32839	3840 // gamma-glutamyltransferase activity // inferred from sequence or structural similarity /// 8233 // peptidase activity // inferred from electronic annotation /// 8415 // acyltransferase activity // inferred from electronic annotation /// 5515 // protein binding // inferred from physical interaction /// 3840 // gamma-glutamyltransferase activity // inferred from electronic annotation /// 384…	6464 // protein modification // inferred from electronic annotation /// 6508 // proteolysis // inferred from electronic annotation /// 6520 // amino acid metabolism // inferred from electronic annotation /// 6629 // lipid metabolism // inferred from electronic annotation	---	IPR000101 // Peptidase T3, gamma-glutamyltranspeptidase // 1.0E-126
3597	144796_at	-0.405821	0.694598	-7.89238	5.93737e-09	9.15099e-08	9.92969	FBgn0000711	CG2096	flw	flap wing	44289	163 // protein phosphatase type 1 activity // inferred from sequence or structural similarity /// 4722 // protein serine/threonine phosphatase activity // non-traceable author statement /// 17018 // myosin phosphatase activity // inferred from direct assay /// 5515 // protein binding // inferred from physical interaction /// 4721 // phosphoprotein phosphatase activity // inferred from electronic …	2168 // larval development (sensu Insecta) // non-traceable author statement /// 6470 // protein amino acid dephosphorylation // inferred from sequence or structural similarity /// 6470 // protein amino acid dephosphorylation // non-traceable author statement /// 7155 // cell adhesion // non-traceable author statement /// 7300 // nurse cell to oocyte transport (sensu Insecta) // inferred from mut…	164 // protein phosphatase type 1 complex // inferred from sequence or structural similarity /// 164 // protein phosphatase type 1 complex // inferred from sequence similarity	IPR004843 // Metallo-phosphoesterase // 2.5E-44
2423	143622_at	-0.543209	1.54458	-7.88613	6.03796e-09	9.29581e-08	9.9127	FBgn0010423	CG9073	TpnC47D	Troponin C at 47D	36195	5509 // calcium ion binding // non-traceable author statement /// 5516 // calmodulin binding // inferred from electronic annotation /// 5509 // calcium ion binding // inferred from electronic annotation	1539 // ciliary or flagellar motility // inferred from electronic annotation /// 6936 // muscle contraction // inferred from electronic annotation /// 19722 // calcium-mediated signaling // inferred from electronic annotation	9288 // flagellum (sensu Bacteria) // inferred from electronic annotation	IPR002048 // Calcium-binding EF-hand // 0.73 /// IPR002048 // Calcium-binding EF-hand // 1.1E-6 /// IPR002048 // Calcium-binding EF-hand // 2.8E-5 /// IPR002048 // Calcium-binding EF-hand // 8.3E-8
3133	144332_at	-0.703999	2.11749	-7.88341	6.08214e-09	9.3433e-08	9.90533	FBgn0028950	CG15255	CG15255	CG15255	34913	4222 // metalloendopeptidase activity // inferred from sequence or structural similarity /// 8270 // zinc ion binding // inferred from electronic annotation /// 8533 // astacin activity // inferred from electronic annotation /// 8237 // metallopeptidase activity // inferred from electronic annotation /// 4222 // metalloendopeptidase activity // inferred from sequence similarity	6508 // proteolysis // inferred from electronic annotation	---	IPR001506 // Peptidase M12A, astacin // 6.3E-67 /// IPR001506 // Peptidase M12A, astacin // 6.3E-67
4566	145765_at	-0.379183	1.45088	-7.88168	6.11063e-09	9.37677e-08	9.90061	FBgn0031613	CG15636	CG15636	CG15636	33661	3677 // DNA binding // inferred from sequence or structural similarity /// 3682 // chromatin binding // inferred from electronic annotation /// 5515 // protein binding // inferred from physical interaction /// 3677 // DNA binding // inferred from sequence similarity	6333 // chromatin assembly or disassembly // inferred from electronic annotation /// 7424 // tracheal system development (sensu Insecta) // inferred from mutant phenotype /// 7475 // apposition of dorsal and ventral wing surfaces // inferred from mutant phenotype	785 // chromatin // inferred from electronic annotation /// 5634 // nucleus // inferred from sequence or structural similarity /// 5634 // nucleus // inferred from electronic annotation /// 5634 // nucleus // inferred from sequence similarity	IPR008251 // Chromo shadow // 2.0E-24
7235	148434_at	-0.347651	0.968196	-7.87977	6.14203e-09	9.41464e-08	9.89543	FBgn0035943	CG5653	CG5653	CG5653	39024	16491 // oxidoreductase activity // inferred from electronic annotation	6118 // electron transport // inferred from electronic annotation	---	IPR002937 // Amine oxidase // 2.5E-98
9997	151196_r_at	-0.457456	1.71649	-7.85945	6.48711e-09	9.92188e-08	9.84016	FBgn0040718	CG15353	CG15353	CG15353	50191	---	---	---	---
5026	146225_at	-0.498739	1.6829	-7.84469	6.74999e-09	1.02903e-07	9.8	FBgn0032336	CG14919	Ast-C	Allatostatin C	34537	5179 // hormone activity // non-traceable author statement /// 5179 // hormone activity // traceable author statement /// 5184 // neuropeptide hormone activity // inferred from direct assay /// 5184 // neuropeptide hormone activity // non-traceable author statement /// 5515 // protein binding // inferred from physical interaction	7218 // neuropeptide signaling pathway // non-traceable author statement /// 7218 // neuropeptide signaling pathway // traceable author statement /// 8016 // regulation of heart contraction // non-traceable author statement	---	---
6239	147438_at	-0.529136	1.24353	-7.8368	6.89498e-09	1.04999e-07	9.77851	FBgn0063495	CG17527	GstE5	Glutathione S transferase E5	37110	4364 // glutathione transferase activity // inferred from sequence or structural similarity /// 4364 // glutathione transferase activity // inferred from sequence similarity	6800 // oxygen and reactive oxygen species metabolism // inferred from electronic annotation /// 6952 // defense response // inferred from electronic annotation /// 9636 // response to toxin // inferred from electronic annotation	---	IPR004046 // Glutathione S-transferase, C-terminal // 9.0E-8 /// IPR004045 // Glutathione S-transferase, N-terminal // 2.3E-18
8715	149914_at	-0.720141	2.43766	-7.82758	7.06842e-09	1.07523e-07	9.7534	FBgn0038257	CG7390	smp-30	Senescence marker protein-30	41786	5509 // calcium ion binding // inferred from electronic annotation	6118 // electron transport // inferred from electronic annotation /// 7165 // signal transduction // inferred from electronic annotation /// 7242 // intracellular signaling cascade // inferred from electronic annotation /// 7275 // development // inferred from electronic annotation /// 9948 // anterior/posterior axis specification // inferred from electronic annotation /// 19722 // calcium-mediat…	---	IPR005511 // Senescence marker protein-30 (SMP-30) // 1.0E-126
10806	152005_at	-0.396606	0.679321	-7.81026	7.40625e-09	1.12296e-07	9.7062	FBgn0038946	CG7077	CG7077	CG7077	42614	16616 // oxidoreductase activity, acting on the CH-OH group of donors, NAD or NADP as acceptor // inferred from sequence or structural similarity /// 16491 // oxidoreductase activity // inferred from electronic annotation /// 16616 // oxidoreductase activity, acting on the CH-OH group of donors, NAD or NADP as acceptor // inferred from sequence similarity	8152 // metabolism // inferred from electronic annotation	---	IPR002198 // Short-chain dehydrogenase/reductase SDR // 6.4E-46
6806	148005_at	-0.462376	0.71488	-7.796	7.69668e-09	1.16072e-07	9.66732	FBgn0027790	CG12023	GV1	GV1	38238	3677 // DNA binding // inferred from direct assay	---	5634 // nucleus // inferred from direct assay /// 5635 // nuclear envelope // inferred from direct assay	---
2643	143842_at	-0.464669	0.356693	-7.79037	7.81456e-09	1.1747e-07	9.65195	FBgn0015781	CG6009	P5cr	Pyrroline 5-carboyxlate reductase	42284	4735 // pyrroline-5-carboxylate reductase activity // inferred from sequence or structural similarity /// 4735 // pyrroline-5-carboxylate reductase activity // inferred from electronic annotation /// 16491 // oxidoreductase activity // inferred from electronic annotation /// 4735 // pyrroline-5-carboxylate reductase activity // inferred from sequence similarity	6561 // proline biosynthesis // inferred from sequence or structural similarity /// 6118 // electron transport // inferred from electronic annotation /// 6561 // proline biosynthesis // inferred from electronic annotation /// 8652 // amino acid biosynthesis // inferred from electronic annotation /// 6561 // proline biosynthesis // inferred from sequence similarity	---	IPR000304 // Delta 1-pyrroline-5-carboxylate reductase // 1.2E-99
11269	152468_at	-0.541196	1.84541	-7.7802	8.03214e-09	1.20482e-07	9.62419	FBgn0051199	CG31199	CG31199	CG31199	42456	4252 // serine-type endopeptidase activity // non-traceable author statement /// 4295 // trypsin activity // inferred from electronic annotation /// 4252 // serine-type endopeptidase activity // inferred from electronic annotation	6508 // proteolysis // inferred from electronic annotation	---	IPR001254 // Peptidase S1, chymotrypsin // 1.5E-8
2750	143949_at	-0.546187	2.39909	-7.76997	8.25713e-09	1.2346e-07	9.59627	FBgn0021765	CG7113	scu	scully	32789	3857 // 3-hydroxyacyl-CoA dehydrogenase activity // inferred from sequence or structural similarity /// 3857 // 3-hydroxyacyl-CoA dehydrogenase activity // non-traceable author statement /// 4303 // estradiol 17-beta-dehydrogenase activity // inferred from direct assay /// 16229 // steroid dehydrogenase activity // inferred from direct assay /// 18454 // acetoacetyl-CoA reductase activity // infe…	6631 // fatty acid metabolism // inferred from direct assay /// 6633 // fatty acid biosynthesis // inferred from electronic annotation /// 6635 // fatty acid beta-oxidation // inferred from electronic annotation /// 6637 // acyl-CoA metabolism // inferred from direct assay /// 8202 // steroid metabolism // inferred from direct assay /// 8205 // ecdysone metabolism // inferred from direct assay //…	5739 // mitochondrion // non-traceable author statement /// 5829 // cytosol // non-traceable author statement /// 5739 // mitochondrion // inferred from sequence or structural similarity /// 5739 // mitochondrion // inferred from electronic annotation	IPR002198 // Short-chain dehydrogenase/reductase SDR // 4.9E-59
5290	146489_at	-0.757897	1.38218	-7.76213	8.4338e-09	1.25968e-07	9.57487	FBgn0041789	CG31794	Pax	Paxillin	35215	5200 // structural constituent of cytoskeleton // inferred from electronic annotation /// 8270 // zinc ion binding // inferred from electronic annotation /// 46872 // metal ion binding // inferred from electronic annotation	6928 // cell motility // inferred from electronic annotation /// 7016 // cytoskeletal anchoring // inferred from sequence or structural similarity /// 7016 // cytoskeletal anchoring // inferred from sequence similarity	5925 // focal adhesion // inferred from sequence or structural similarity /// 5925 // focal adhesion // non-traceable author statement /// 5925 // focal adhesion // inferred from sequence similarity	---
7661	148860_at	-0.394419	1.4183	-7.75386	8.6246e-09	1.28543e-07	9.55226	FBgn0036587	CG4950	CG4950	CG4950	39783	4872 // receptor activity // inferred from electronic annotation	6952 // defense response // inferred from electronic annotation /// 7155 // cell adhesion // inferred from electronic annotation /// 7165 // signal transduction // inferred from electronic annotation /// 7166 // cell surface receptor linked signal transduction // inferred from electronic annotation /// 19221 // cytokine and chemokine mediated signaling pathway // inferred from electronic annotati…	---	IPR001611 // Leucine-rich repeat // 0.06 /// IPR001611 // Leucine-rich repeat // 0.0040 /// IPR001611 // Leucine-rich repeat // 0.0035 /// IPR001611 // Leucine-rich repeat // 0.16 /// IPR001611 // Leucine-rich repeat // 0.19 /// IPR001611 // Leucine-rich repeat // 0.59 /// IPR001611 // Leucine-rich repeat // 0.011 /// IPR001611 // Leucine-rich repeat // 0.044 /// IPR001611 // Leucine-rich repeat …
5809	147008_at	-0.348298	-0.0851792	-7.74897	8.7393e-09	1.30114e-07	9.5389	FBgn0033612	CG13210	CG13210	CG13210	36205	---	---	---	---
5280	146479_at	-0.53751	0.732044	-7.74298	8.88209e-09	1.3182e-07	9.52252	FBgn0000075	CG10501	amd	methyl dopa-resistant	35188	4058 // aromatic-L-amino-acid decarboxylase activity // inferred from sequence or structural similarity /// 16831 // carboxy-lyase activity // non-traceable author statement /// 16829 // lyase activity // inferred from electronic annotation /// 16831 // carboxy-lyase activity // inferred from electronic annotation /// 4058 // aromatic-L-amino-acid decarboxylase activity // inferred from sequence …	6520 // amino acid metabolism // inferred from electronic annotation /// 6584 // catecholamine metabolism // non-traceable author statement /// 40003 // cuticle biosynthesis (sensu Insecta) // non-traceable author statement /// 42417 // dopamine metabolism // non-traceable author statement /// 6519 // amino acid and derivative metabolism // inferred from electronic annotation /// 19752 // carboxy…	---	IPR002129 // Pyridoxal-dependent decarboxylase // 1.0E-126
4128	145327_s_at	-0.557882	0.843889	-7.73908	8.97628e-09	1.33077e-07	9.51186	FBgn0030958 /// FBgn0030955	CG6891 /// CG6900	CG6900 /// CG6891	CG6900 /// CG6891	32865 /// 32868	3779 // actin binding // inferred from electronic annotation	---	5622 // intracellular // inferred from electronic annotation	IPR002108 // Actin-binding, cofilin/tropomyosin type // 6.2E-12 /// IPR002108 // Actin-binding, cofilin/tropomyosin type // 6.2E-12 /// IPR002108 // Actin-binding, cofilin/tropomyosin type // 2.9E-5
9908	151107_r_at	-0.579316	1.76863	-7.73456	9.08674e-09	1.34572e-07	9.4995	FBgn0005596	CG14513	yem	yemanuclein	43439	3677 // DNA binding // non-traceable author statement /// 3677 // DNA binding // traceable author statement	9993 // oogenesis (sensu Insecta) // non-traceable author statement	5634 // nucleus // non-traceable author statement /// 5634 // nucleus // traceable author statement	---
13080	154279_at	-0.395953	3.72838	-7.73294	9.12666e-09	1.35021e-07	9.49507	FBgn0028665	CG2934	VhaAC39	VhaAC39	31342	8553 // hydrogen-exporting ATPase activity, phosphorylative mechanism // inferred from sequence or structural similarity /// 8553 // hydrogen-exporting ATPase activity, phosphorylative mechanism // non-traceable author statement /// 46933 // hydrogen-transporting ATP synthase activity, rotational mechanism // inferred from electronic annotation /// 46961 // hydrogen-transporting ATPase activity, …	15986 // ATP synthesis coupled proton transport // inferred from electronic annotation /// 15992 // proton transport // non-traceable author statement /// 6754 // ATP biosynthesis // inferred from electronic annotation /// 6810 // transport // inferred from electronic annotation /// 6811 // ion transport // inferred from electronic annotation /// 15992 // proton transport // inferred from electro…	220 // hydrogen-transporting ATPase V0 domain // inferred from sequence or structural similarity /// 220 // hydrogen-transporting ATPase V0 domain // non-traceable author statement /// 16469 // proton-transporting two-sector ATPase complex // inferred from electronic annotation /// 220 // hydrogen-transporting ATPase V0 domain // inferred from sequence similarity	IPR002843 // H+-transporting two-sector ATPase, C (AC39) subunit // 1.0E-126
11730	152929_at	-0.588446	0.88621	-7.73192	9.15185e-09	1.35108e-07	9.49228	FBgn0038799	CG4288	CG4288	CG4288	42426	5316 // high affinity inorganic phosphate:sodium symporter activity // inferred from sequence or structural similarity /// 5515 // protein binding // inferred from physical interaction /// 5215 // transporter activity // inferred from electronic annotation /// 5316 // high affinity inorganic phosphate:sodium symporter activity // inferred from sequence similarity	5975 // carbohydrate metabolism // inferred from electronic annotation /// 6796 // phosphate metabolism // inferred from electronic annotation /// 6812 // cation transport // inferred from electronic annotation /// 6817 // phosphate transport // inferred from electronic annotation /// 6858 // extracellular transport // inferred from electronic annotation /// 8643 // carbohydrate transport // infe…	16021 // integral to membrane // inferred from electronic annotation /// 16020 // membrane // inferred from electronic annotation	---
13537	154736_at	-0.483873	1.77698	-7.71254	9.64484e-09	1.41937e-07	9.43926	FBgn0032476	CG5439	CG5439	CG5439	34710	5515 // protein binding // inferred from electronic annotation /// 35091 // phosphoinositide binding // inferred from electronic annotation	7242 // intracellular signaling cascade // inferred from electronic annotation	---	IPR001683 // Phox-like // 3.4E-27 /// IPR004012 // RUN domain // 1.3E-60
8800	149999_at	-0.47974	0.572875	-7.70047	9.96543e-09	1.46194e-07	9.40621	FBgn0038404	CG8925	CG8925	CG8925	41963	8324 // cation transporter activity // inferred from electronic annotation /// 15226 // carnitine transporter activity // inferred from sequence or structural similarity /// 5215 // transporter activity // inferred from electronic annotation /// 15226 // carnitine transporter activity // inferred from sequence similarity	6812 // cation transport // inferred from electronic annotation /// 6858 // extracellular transport // inferred from electronic annotation /// 6810 // transport // inferred from electronic annotation	16020 // membrane // inferred from electronic annotation /// 16021 // integral to membrane // inferred from electronic annotation	IPR005828 // General substrate transporter // 2.7E-18 /// IPR005828 // General substrate transporter // 2.7E-18
11039	152238_at	-0.894698	3.78208	-7.6913	1.02162e-08	1.4956e-07	9.3811	FBgn0036203	CG6004	CG6004	CG6004	39326	3712 // transcription cofactor activity // inferred from electronic annotation /// 8061 // chitin binding // inferred from electronic annotation /// 8324 // cation transporter activity // inferred from electronic annotation /// 15144 // carbohydrate transporter activity // inferred from electronic annotation /// 16490 // structural constituent of peritrophic membrane (sensu Insecta) // inferred f…	5975 // carbohydrate metabolism // inferred from electronic annotation /// 6030 // chitin metabolism // inferred from electronic annotation /// 6812 // cation transport // inferred from electronic annotation /// 8643 // carbohydrate transport // inferred from electronic annotation	5576 // extracellular region // inferred from electronic annotation	IPR002557 // Chitin binding Peritrophin-A // 2.8E-21 /// IPR002557 // Chitin binding Peritrophin-A // 1.4E-22 /// IPR002557 // Chitin binding Peritrophin-A // 9.9E-8
3189	144388_at	-0.326589	0.609647	-7.67759	1.06033e-08	1.54903e-07	9.34352	FBgn0029589	CG14810	CG14810	CG14810	31131	---	---	---	---
9617	150816_at	-0.508894	2.46393	-7.6714	1.07827e-08	1.57197e-07	9.32656	FBgn0062442	CG1458	CG1458	CG1458	43459	---	---	---	---
2046	143245_at	-0.881714	2.18565	-7.66519	1.0966e-08	1.59537e-07	9.30953	FBgn0002578 /// FBgn0082722 /// FBgn0082695	CG8342	m1 /// Dsimm1 /// Dyakm1	E(spl) region transcript m1 /// m1 /// m1	43154	4867 // serine-type endopeptidase inhibitor activity // inferred from sequence or structural similarity /// 4866 // endopeptidase inhibitor activity // inferred from electronic annotation /// 4867 // serine-type endopeptidase inhibitor activity // inferred from electronic annotation /// 4867 // serine-type endopeptidase inhibitor activity // inferred from sequence similarity	7275 // development // inferred from electronic annotation /// 7399 // nervous system development // inferred from electronic annotation /// 30154 // cell differentiation // inferred from electronic annotation	---	IPR002350 // Serine protease inhibitor, Kazal type // 6.9E-7
1849	143048_at	-0.464176	0.930486	-7.66025	1.11141e-08	1.61356e-07	9.29597	FBgn0050387	CG30387	CG30387	CG30387	37433	5057 // receptor signaling protein activity // inferred from electronic annotation /// 5102 // receptor binding // inferred from electronic annotation	---	---	IPR002110 // Ankyrin // 0.0035 /// IPR002110 // Ankyrin // 4.2E-10 /// IPR002110 // Ankyrin // 6.3E-10 /// IPR002110 // Ankyrin // 1.1E-5 /// IPR002110 // Ankyrin // 2.7E-7 /// IPR002110 // Ankyrin // 1.8E-6 /// IPR002110 // Ankyrin // 1.8E-7 /// IPR002110 // Ankyrin // 7.8E-6 /// IPR002110 // Ankyrin // 3.4E-4 /// IPR002110 // Ankyrin // 1.4E-8 /// IPR002110 // Ankyrin // 0.0095 /// IPR002110 //…
6022	147221_at	-0.558676	2.94442	-7.65744	1.11991e-08	1.62422e-07	9.28827	FBgn0033961	CG12859	CG12859	CG12859	36640	3954 // NADH dehydrogenase activity // inferred from sequence or structural similarity /// 3954 // NADH dehydrogenase activity // inferred from sequence similarity	6120 // mitochondrial electron transport, NADH to ubiquinone // inferred from sequence or structural similarity /// 6120 // mitochondrial electron transport, NADH to ubiquinone // inferred from sequence similarity	5747 // respiratory chain complex I (sensu Eukaryota) // inferred from sequence or structural similarity /// 5747 // respiratory chain complex I (sensu Eukaryota) // inferred from sequence similarity	---
3167	144366_at	-0.350174	0.851314	-7.65486	1.12779e-08	1.63395e-07	9.28119	FBgn0040365	CG14628	CG14628	CG14628	31057	3729 // mRNA binding // inferred from sequence or structural similarity /// 166 // nucleotide binding // inferred from electronic annotation /// 3676 // nucleic acid binding // inferred from electronic annotation /// 3729 // mRNA binding // inferred from sequence similarity	---	---	IPR000504 // RNA-binding region RNP-1 (RNA recognition motif) // 1.1E-10
3361	144560_at	-0.445585	1.06961	-7.64163	1.16907e-08	1.68811e-07	9.24487	FBgn0029821	CG4020	CG4020	CG4020	31522	16491 // oxidoreductase activity // inferred from electronic annotation	---	---	IPR004262 // Male sterility protein // 2.7E-97
7681	148880_r_at	-0.575842	2.14419	-7.64156	1.16929e-08	1.68811e-07	9.24467	FBgn0036606	CG13060	CG13060	CG13060	39802	---	---	---	IPR007614 // Retinin-like protein // 1.0E-27
12495	153694_at	-0.838961	1.05046	-7.61987	1.24029e-08	1.78586e-07	9.18512	FBgn0036650	CG3971	Baldspot	Baldspot	39860	---	---	16021 // integral to membrane // non-traceable author statement /// 16021 // integral to membrane // inferred from electronic annotation	IPR002076 // GNS1/SUR4 membrane protein // 5.2E-74
6599	147798_at	-0.319446	1.52769	-7.618	1.2466e-08	1.79126e-07	9.17999	FBgn0034893	CG5479	mRpL43	mitochondrial ribosomal protein L43	37750	3735 // structural constituent of ribosome // inferred from sequence or structural similarity /// 3735 // structural constituent of ribosome // inferred from sequence similarity	6412 // protein biosynthesis // inferred from sequence or structural similarity /// 6412 // protein biosynthesis // inferred from sequence similarity	5762 // mitochondrial large ribosomal subunit // inferred from sequence or structural similarity /// 5762 // mitochondrial large ribosomal subunit // inferred from sequence similarity	IPR007741 // Mitochondrial ribosome // 2.9E-49
4799	145998_at	-0.461195	0.234659	-7.6046	1.29291e-08	1.85591e-07	9.14314	FBgn0031968	CG7231	CG7231	CG7231	34086	---	---	---	---
10837	152036_at	-0.407422	2.91711	-7.59863	1.31408e-08	1.88437e-07	9.12673	FBgn0027785	CG6008	NP15.6	NP15.6	42282	---	---	---	---
2746	143945_at	-0.627689	3.60495	-7.59808	1.31605e-08	1.88526e-07	9.12522	FBgn0020907	CG14904	Scp2	Sarcoplasmic calcium-binding protein 2	42015	3924 // GTPase activity // inferred from direct assay /// 3924 // GTPase activity // inferred from sequence or structural similarity /// 5509 // calcium ion binding // inferred from sequence or structural similarity /// 5509 // calcium ion binding // non-traceable author statement /// 5515 // protein binding // inferred from physical interaction /// 5509 // calcium ion binding // inferred from el…	---	16529 // sarcoplasmic reticulum // inferred from sequence or structural similarity /// 16529 // sarcoplasmic reticulum // inferred from sequence similarity	IPR002048 // Calcium-binding EF-hand // 0.038 /// IPR002048 // Calcium-binding EF-hand // 0.0011 /// IPR002048 // Calcium-binding EF-hand // 0.05
10850	152049_at	-1.24293	5.74886	-7.59737	1.31858e-08	1.88695e-07	9.12328	FBgn0004181	CG2668	Peb	Protein ejaculatory bulb	38009	5198 // structural molecule activity // inferred from expression pattern /// 5515 // protein binding // inferred from physical interaction	42628 // mating plug formation // traceable author statement /// 45297 // post-mating behavior // inferred from expression pattern /// 7610 // behavior // inferred from electronic annotation	5576 // extracellular region // inferred from direct assay	---
8629	149828_at	-0.652199	1.64112	-7.59563	1.32484e-08	1.89398e-07	9.11849	FBgn0038130	CG8630	CG8630	CG8630	41629	4768 // stearoyl-CoA 9-desaturase activity // inferred from sequence or structural similarity /// 5506 // iron ion binding // inferred from electronic annotation /// 5515 // protein binding // inferred from physical interaction /// 4768 // stearoyl-CoA 9-desaturase activity // inferred from electronic annotation /// 16491 // oxidoreductase activity // inferred from electronic annotation /// 16717…	6631 // fatty acid metabolism // inferred from electronic annotation /// 6633 // fatty acid biosynthesis // inferred from electronic annotation /// 8610 // lipid biosynthesis // inferred from electronic annotation	5783 // endoplasmic reticulum // inferred from electronic annotation /// 16020 // membrane // inferred from electronic annotation /// 16021 // integral to membrane // inferred from electronic annotation	IPR005804 // Fatty acid desaturase // 9.5E-85
8280	149479_at	-0.494766	0.259928	-7.59202	1.33794e-08	1.90882e-07	9.10855	FBgn0051463	CG31463	CG31463	CG31463	40978	---	---	---	---
12305	153504_at	-0.546614	1.46252	-7.58582	1.36071e-08	1.93736e-07	9.0915	FBgn0053138	CG33138	CG33138	CG33138	326264	3844 // 1,4-alpha-glucan branching enzyme activity // inferred from sequence or structural similarity /// 4553 // hydrolase activity, hydrolyzing O-glycosyl compounds // inferred from electronic annotation /// 4556 // alpha-amylase activity // inferred from electronic annotation /// 3844 // 1,4-alpha-glucan branching enzyme activity // inferred from sequence similarity	5977 // glycogen metabolism // inferred from electronic annotation /// 5975 // carbohydrate metabolism // inferred from electronic annotation	---	IPR006047 // Alpha amylase, catalytic domain // 1.6E-11 /// IPR004193 // Glycoside hydrolase, family 13, N-terminal // 6.2E-34
11832	153031_at	-0.488803	4.16232	-7.55532	1.47867e-08	2.0989e-07	9.00752	FBgn0038037	CG11466	Cyp9f2	Cyp9f2	41520	4497 // monooxygenase activity // inferred from electronic annotation /// 16491 // oxidoreductase activity // inferred from electronic annotation /// 5506 // iron ion binding // inferred from electronic annotation /// 20037 // heme binding // inferred from electronic annotation /// 46872 // metal ion binding // inferred from electronic annotation	6118 // electron transport // inferred from electronic annotation	5792 // microsome // non-traceable author statement /// 16020 // membrane // non-traceable author statement /// 5783 // endoplasmic reticulum // inferred from electronic annotation /// 5792 // microsome // inferred from electronic annotation /// 16020 // membrane // inferred from electronic annotation	IPR001128 // Cytochrome P450 // 1.5E-76 /// IPR001128 // Cytochrome P450 // 1.5E-79
10775	151974_at	-0.397655	2.77585	-7.55143	1.49442e-08	2.11911e-07	8.99681	FBgn0037720	CG8312	CG8312	CG8312	41163	---	---	---	---
1300	142499_at	-0.537728	2.47116	-7.54572	1.51789e-08	2.15022e-07	8.98107	FBgn0019830	CG3057	colt	congested-like trachea	33470	5215 // transporter activity // inferred from sequence or structural similarity /// 5215 // transporter activity // non-traceable author statement /// 5476 // carnitine:acyl carnitine antiporter activity // inferred from sequence or structural similarity /// 5488 // binding // inferred from electronic annotation /// 5215 // transporter activity // inferred from electronic annotation /// 5215 // t…	6629 // lipid metabolism // inferred from electronic annotation /// 6839 // mitochondrial transport // inferred from sequence or structural similarity /// 6844 // acyl carnitine transport // inferred from sequence or structural similarity /// 6869 // lipid transport // inferred from electronic annotation /// 15879 // carnitine transport // inferred from sequence or structural similarity /// 6810 …	5740 // mitochondrial envelope // inferred from sequence or structural similarity /// 5740 // mitochondrial envelope // non-traceable author statement /// 5743 // mitochondrial inner membrane // inferred from sequence or structural similarity /// 5739 // mitochondrion // inferred from electronic annotation /// 5743 // mitochondrial inner membrane // inferred from electronic annotation /// 16020 /…	IPR001993 // Mitochondrial substrate carrier // 7.3E-35 /// IPR001993 // Mitochondrial substrate carrier // 5.7E-33 /// IPR001993 // Mitochondrial substrate carrier // 2.3E-27
12004	153203_at	-0.492485	1.9889	-7.54453	1.52282e-08	2.15502e-07	8.9778	FBgn0039156	CG6178	CG6178	CG6178	42867	4321 // fatty-acyl-CoA synthase activity // inferred from direct assay /// 4467 // long-chain-fatty-acid-CoA ligase activity // inferred from direct assay /// 16874 // ligase activity // inferred from electronic annotation /// 45289 // luciferin monooxygenase activity // inferred from direct assay /// 5515 // protein binding // inferred from physical interaction /// 3824 // catalytic activity // …	1676 // long-chain fatty acid metabolism // inferred from direct assay /// 6631 // fatty acid metabolism // inferred from electronic annotation /// 6637 // acyl-CoA metabolism // inferred from direct assay /// 46949 // acyl-CoA biosynthesis // inferred from direct assay /// 8152 // metabolism // inferred from electronic annotation	---	IPR000873 // AMP-dependent synthetase and ligase // 2.2E-104
9300	150499_at	-0.456973	1.00632	-7.52728	1.5962e-08	2.24977e-07	8.93026	FBgn0039178	CG6356	CG6356	CG6356	42893	8513 // organic cation porter activity // inferred from sequence or structural similarity /// 15144 // carbohydrate transporter activity // inferred from electronic annotation /// 5215 // transporter activity // inferred from electronic annotation /// 8513 // organic cation porter activity // inferred from sequence similarity	5975 // carbohydrate metabolism // inferred from electronic annotation /// 6812 // cation transport // inferred from electronic annotation /// 6858 // extracellular transport // inferred from electronic annotation /// 8643 // carbohydrate transport // inferred from electronic annotation /// 6810 // transport // inferred from electronic annotation	16021 // integral to membrane // inferred from electronic annotation /// 16020 // membrane // inferred from electronic annotation	IPR005828 // General substrate transporter // 8.8E-13
11459	152658_at	-0.396433	1.43173	-7.52648	1.59969e-08	2.25243e-07	8.92805	FBgn0030304	CG11715	Cyp4g15	Cyp4g15	32093	4497 // monooxygenase activity // inferred from electronic annotation /// 16491 // oxidoreductase activity // inferred from electronic annotation /// 5506 // iron ion binding // inferred from electronic annotation /// 20037 // heme binding // inferred from electronic annotation /// 46872 // metal ion binding // inferred from electronic annotation	6118 // electron transport // inferred from electronic annotation /// 6694 // steroid biosynthesis // non-traceable author statement /// 6810 // transport // inferred from electronic annotation	5792 // microsome // non-traceable author statement /// 16020 // membrane // non-traceable author statement /// 5783 // endoplasmic reticulum // inferred from electronic annotation /// 5792 // microsome // inferred from electronic annotation /// 16020 // membrane // inferred from electronic annotation	IPR001128 // Cytochrome P450 // 2.6E-31 /// IPR001128 // Cytochrome P450 // 3.8E-74 /// IPR001128 // Cytochrome P450 // 3.8E-74
11476	152675_at	-0.660972	2.15119	-7.51837	1.63555e-08	2.30061e-07	8.90566	FBgn0030484	CG1681	CG1681	CG1681	32299	4364 // glutathione transferase activity // inferred from sequence or structural similarity /// 5515 // protein binding // inferred from physical interaction /// 16740 // transferase activity // inferred from electronic annotation /// 4364 // glutathione transferase activity // inferred from sequence similarity	6952 // defense response // inferred from electronic annotation /// 9636 // response to toxin // inferred from electronic annotation	---	IPR004046 // Glutathione S-transferase, C-terminal // 6.7E-9 /// IPR004045 // Glutathione S-transferase, N-terminal // 3.0E-10
9140	150339_at	-0.458584	1.0952	-7.51753	1.63929e-08	2.30355e-07	8.90336	FBgn0038918	CG6690	CG6690	CG6690	42582	15926 // glucosidase activity // inferred from electronic annotation /// 16971 // flavin-linked sulfhydryl oxidase activity // inferred from sequence or structural similarity /// 16971 // flavin-linked sulfhydryl oxidase activity // inferred from sequence similarity	6118 // electron transport // inferred from electronic annotation /// 6464 // protein modification // inferred from electronic annotation	---	IPR006863 // Erv1/Alr // 1.7E-15
11357	152556_at	-0.602583	1.89727	-7.51484	1.65136e-08	2.31819e-07	8.89595	FBgn0019929	CG2045	Ser7	Ser7	31917	4197 // cysteine-type endopeptidase activity // inferred from electronic annotation /// 4252 // serine-type endopeptidase activity // inferred from sequence or structural similarity /// 4263 // chymotrypsin activity // inferred from electronic annotation /// 4295 // trypsin activity // non-traceable author statement /// 8236 // serine-type peptidase activity // inferred from sequence or structura…	6508 // proteolysis // non-traceable author statement /// 6508 // proteolysis // inferred from electronic annotation	---	IPR001254 // Peptidase S1, chymotrypsin // 6.6E-55
10716	151915_at	-0.424664	1.70351	-7.50245	1.70823e-08	2.39323e-07	8.86175	FBgn0027596	CG10249	CG10249	CG10249	36668	---	---	---	IPR002110 // Ankyrin // 8.4E-8 /// IPR002110 // Ankyrin // 6.4 /// IPR002110 // Ankyrin // 1.7E-10 /// IPR002110 // Ankyrin // 1.5E-7 /// IPR002110 // Ankyrin // 8.4E-8 /// IPR002110 // Ankyrin // 6.4 /// IPR002110 // Ankyrin // 1.7E-10 /// IPR002110 // Ankyrin // 1.5E-7 /// IPR002110 // Ankyrin // 8.4E-8 /// IPR002110 // Ankyrin // 6.4 /// IPR002110 // Ankyrin // 1.7E-10 /// IPR002110 // Ankyrin…
5576	146775_at	-0.396691	1.84939	-7.47378	1.84757e-08	2.5807e-07	8.78256	FBgn0033232	CG12159	CG12159	CG12159	35741	---	---	---	---
10194	151393_s_at	-0.482463	3.71555	-7.46861	1.87388e-08	2.60965e-07	8.76828	FBgn0029971	CG18624	CG18624	CG18624	31697	3954 // NADH dehydrogenase activity // inferred from sequence or structural similarity /// 3954 // NADH dehydrogenase activity // inferred from sequence similarity	6120 // mitochondrial electron transport, NADH to ubiquinone // inferred from sequence or structural similarity /// 6120 // mitochondrial electron transport, NADH to ubiquinone // inferred from sequence similarity	5747 // respiratory chain complex I (sensu Eukaryota) // inferred from sequence or structural similarity /// 5747 // respiratory chain complex I (sensu Eukaryota) // inferred from sequence similarity	---
10924	152123_at	-0.390833	2.47716	-7.46861	1.87388e-08	2.60965e-07	8.76828	FBgn0038321	CG6218	CG6218	CG6218	41863	16301 // kinase activity // inferred from electronic annotation /// 19200 // carbohydrate kinase activity // inferred from electronic annotation /// 5515 // protein binding // inferred from physical interaction	5975 // carbohydrate metabolism // inferred from electronic annotation /// 5996 // monosaccharide metabolism // inferred from electronic annotation	---	IPR002731 // ATPase, BadF/BadG/BcrA/BcrD type // 1.4E-36
2459	143658_at	-0.449169	3.27884	-7.45847	1.92663e-08	2.68045e-07	8.74024	FBgn0011361	CG9160	mtacp1	mitochondrial acyl carrier protein 1	38154	36 // acyl carrier activity // inferred from electronic annotation /// 3954 // NADH dehydrogenase activity // inferred from sequence or structural similarity /// 8137 // NADH dehydrogenase (ubiquinone) activity // inferred from sequence or structural similarity /// 8137 // NADH dehydrogenase (ubiquinone) activity // non-traceable author statement /// 48037 // cofactor binding // inferred from ele…	6120 // mitochondrial electron transport, NADH to ubiquinone // inferred from sequence or structural similarity /// 6633 // fatty acid biosynthesis // inferred from electronic annotation /// 8610 // lipid biosynthesis // inferred from electronic annotation /// 6120 // mitochondrial electron transport, NADH to ubiquinone // inferred from sequence similarity	5739 // mitochondrion // non-traceable author statement /// 5747 // respiratory chain complex I (sensu Eukaryota) // inferred from sequence or structural similarity /// 5739 // mitochondrion // inferred from electronic annotation /// 5747 // respiratory chain complex I (sensu Eukaryota) // inferred from sequence similarity	IPR006163 // Phosphopantetheine-binding domain // 4.3E-14 /// IPR006163 // Phosphopantetheine-binding domain // 1.2E-14
10339	151538_s_at	-1.20961	3.89074	-7.43707	2.04292e-08	2.83661e-07	8.68106	FBgn0016724	CG11064	RfaBp	Retinoid- and fatty-acid binding protein	43827	5198 // structural molecule activity // inferred from sequence or structural similarity /// 5319 // lipid transporter activity // inferred from electronic annotation /// 5501 // retinoid binding // non-traceable author statement /// 5504 // fatty acid binding // non-traceable author statement /// 8017 // microtubule binding // inferred from direct assay /// 19841 // retinol binding // inferred fr…	6810 // transport // traceable author statement /// 6869 // lipid transport // inferred from electronic annotation /// 7224 // smoothened signaling pathway // inferred from mutant phenotype /// 16055 // Wnt receptor signaling pathway // inferred from mutant phenotype /// 6810 // transport // inferred from electronic annotation /// 16055 // Wnt receptor signaling pathway // inferred from electroni…	5576 // extracellular region // non-traceable author statement	IPR009454 // Protein of unknown function DUF1081 // 3.0E-55 /// IPR001846 // von Willebrand factor, type D // 2.9E-29 /// IPR001747 // Lipid transport protein, N-terminal // 7.1E-119
9375	150574_at	-0.692188	1.98155	-7.4262	2.1047e-08	2.9166e-07	8.65098	---	CG11889 /// CG11891	---	---	---	16301 // kinase activity // inferred from electronic annotation /// 16740 // transferase activity // inferred from electronic annotation	---	---	---
9224	150423_at	-0.419194	0.181082	-7.40766	2.21449e-08	3.06268e-07	8.59964	FBgn0039051	CG17109	CG17109	CG17109	42730	4046 // aminoacylase activity // non-traceable author statement /// 8237 // metallopeptidase activity // inferred from electronic annotation /// 4046 // aminoacylase activity // inferred from electronic annotation /// 16787 // hydrolase activity // inferred from electronic annotation /// 46983 // protein dimerization activity // inferred from electronic annotation	6508 // proteolysis // inferred from electronic annotation /// 6520 // amino acid metabolism // inferred from electronic annotation	5737 // cytoplasm // inferred from electronic annotation	IPR002933 // Peptidase M20 // 7.4E-91
4437	145636_at	-0.627559	2.34606	-7.39965	2.26374e-08	3.12463e-07	8.57743	FBgn0031417	CG3597	CG3597	CG3597	33420	16491 // oxidoreductase activity // inferred from electronic annotation	6118 // electron transport // inferred from electronic annotation /// 8152 // metabolism // inferred from electronic annotation	---	IPR000683 // Oxidoreductase, N-terminal // 5.6E-28 /// IPR004104 // Oxidoreductase, C-terminal // 7.9E-6
7871	149070_at	-0.398658	0.619057	-7.38192	2.37668e-08	3.26764e-07	8.52828	FBgn0052209	CG32209	CG32209	CG32209	40150	8061 // chitin binding // inferred from electronic annotation /// 16810 // hydrolase activity, acting on carbon-nitrogen (but not peptide) bonds // inferred from electronic annotation	5975 // carbohydrate metabolism // inferred from electronic annotation /// 6030 // chitin metabolism // inferred from electronic annotation	5576 // extracellular region // inferred from electronic annotation	IPR002172 // Low density lipoprotein-receptor, class A // 3.5E-9 /// IPR002509 // Polysaccharide deacetylase // 7.1E-7 /// IPR002557 // Chitin binding Peritrophin-A // 4.3E-15
7804	149003_at	-0.451726	1.34373	-7.36637	2.48041e-08	3.40359e-07	8.48515	FBgn0052199	CG32199	CG32199	CG32199	40028	4656 // procollagen-proline 4-dioxygenase activity // inferred from sequence or structural similarity /// 16706 // oxidoreductase activity, acting on paired donors, with incorporation or reduction of molecular oxygen, 2-oxoglutarate as one donor, and incorporation of one atom each of oxygen into both donors // inferred from electronic annotation /// 4656 // procollagen-proline 4-dioxygenase activ…	18401 // peptidyl-proline hydroxylation to 4-hydroxy-L-proline // inferred from sequence or structural similarity /// 19538 // protein metabolism // inferred from electronic annotation /// 18401 // peptidyl-proline hydroxylation to 4-hydroxy-L-proline // inferred from sequence similarity	16222 // procollagen-proline, 2-oxoglutarate-4-dioxygenase complex // inferred from sequence or structural similarity /// 16222 // procollagen-proline, 2-oxoglutarate-4-dioxygenase complex // inferred from sequence similarity	IPR005123 // 2OG-Fe(II) oxygenase superfamily // 4.7E-11
3991	145190_at	-0.399849	0.749214	-7.36467	2.49201e-08	3.41615e-07	8.48044	FBgn0030756	CG9903	CG9903	CG9903	32621	8508 // bile acid:sodium symporter activity // inferred from sequence or structural similarity /// 8508 // bile acid:sodium symporter activity // inferred from electronic annotation /// 8508 // bile acid:sodium symporter activity // inferred from sequence similarity	6812 // cation transport // inferred from electronic annotation /// 6814 // sodium ion transport // inferred from electronic annotation	16020 // membrane // inferred from electronic annotation	IPR002657 // Bile acid:sodium symporter // 6.7E-14
[truncated: 835 more rows]
