# Supplementary material for: Gene expression changes in response to aging compared to heat stress, oxidative stress and ionizing radiation in Drosophila melanogaster
Source: Aging (Albany NY). 2012 Nov 30;4(11):768–89. doi: 10.18632/aging.100499 (PMC3560439; doi:10.18632/aging.100499)
Supplement: Supplementary file 11 [file aging-04-768-s011.xlsx]

## Sheet: TableS4g.H2O2up
Table S4g. H2O2 up
index	ID	M	A	t	P.Value	adj.P.Val	B	FlyBase	Ensembl	Gene.Symbol	Gene.Title	Entrez.Gene	Gene.Ontology.Molecular.Function	Gene.Ontology.Biological.Process	Gene.Ontology.Cellular.Component	InterPro
11923	153122_at	4.71918	3.47582	44.0226	7.92e-30	1.11e-25	57.0018	FBgn0000052	CG9127	ade2	adenosine 2	33847	4642 // phosphoribosylformylglycinamidine synthase activity // inferred from sequence or structural similarity /// 4642 // phosphoribosylformylglycinamidine synthase activity // non-traceable author statement /// 3824 // catalytic activity // inferred from electronic annotation /// 4642 // phosphoribosylformylglycinamidine synthase activity // inferred from electronic annotation /// 4642 // phosp…	6144 // purine base metabolism // inferred from electronic annotation /// 6189 // 'de novo' IMP biosynthesis // inferred from sequence or structural similarity /// 6189 // 'de novo' IMP biosynthesis // non-traceable author statement /// 6189 // 'de novo' IMP biosynthesis // inferred from electronic annotation /// 6189 // 'de novo' IMP biosynthesis // inferred from sequence similarity	---	IPR010918 // AIR synthase related protein, C-terminal // 2.2E-29 /// IPR010918 // AIR synthase related protein, C-terminal // 3.0E-14 /// IPR000728 // AIR synthase related protein // 1.3E-41
11702	152901_at	4.49548	3.6743	36.74	2.1e-27	1.47e-23	51.9898	FBgn0032699	CG10383	CG10383	CG10383	35123	5488 // binding // inferred from electronic annotation	---	---	---
10568	151767_at	4.11677	2.69898	28.1529	7.14e-24	1.06e-20	44.3461	FBgn0010222	CG18466	Nmdmc	NAD-dependent methylenetetrahydrofolate dehydrogenase	47895	287 // magnesium ion binding // non-traceable author statement /// 4477 // methenyltetrahydrofolate cyclohydrolase activity // inferred from sequence or structural similarity /// 4477 // methenyltetrahydrofolate cyclohydrolase activity // non-traceable author statement /// 4487 // methylenetetrahydrofolate dehydrogenase (NAD+) activity // non-traceable author statement /// 4488 // methylenetetrah…	5975 // carbohydrate metabolism // inferred from sequence or structural similarity /// 8652 // amino acid biosynthesis // inferred from electronic annotation /// 9256 // 10-formyltetrahydrofolate metabolism // inferred from sequence or structural similarity /// 9396 // folic acid and derivative biosynthesis // inferred from electronic annotation /// 46653 // tetrahydrofolate metabolism // inferre…	5739 // mitochondrion // inferred from sequence or structural similarity /// 5739 // mitochondrion // non-traceable author statement /// 5739 // mitochondrion // inferred from electronic annotation /// 5739 // mitochondrion // inferred from sequence similarity	IPR000672 // Tetrahydrofolate dehydrogenase/cyclohydrolase // 5.3E-79 /// IPR000672 // Tetrahydrofolate dehydrogenase/cyclohydrolase // 3.5E-112 /// IPR000672 // Tetrahydrofolate dehydrogenase/cyclohydrolase // 5.3E-79 /// IPR000672 // Tetrahydrofolate dehydrogenase/cyclohydrolase // 3.5E-112
9483	150682_at	3.97439	4.01201	28.1027	7.54e-24	1.06e-20	44.2943	---	CG14245 /// CG14246	---	---	---	---	---	---	---
154	141353_at	3.848	2.00383	23.9021	9.83e-22	8.1e-19	39.575	FBgn0038299	CG6687	CG6687	CG6687	41829	4867 // serine-type endopeptidase inhibitor activity // inferred from sequence or structural similarity /// 46933 // hydrogen-transporting ATP synthase activity, rotational mechanism // inferred from electronic annotation /// 46961 // hydrogen-transporting ATPase activity, rotational mechanism // inferred from electronic annotation /// 5515 // protein binding // inferred from physical interaction…	6508 // proteolysis // inferred from electronic annotation /// 15986 // ATP synthesis coupled proton transport // inferred from electronic annotation	16020 // membrane // inferred from electronic annotation /// 16469 // proton-transporting two-sector ATPase complex // inferred from electronic annotation	IPR000215 // Serpin // 4.7E-69
5559	146758_at	3.80928	1.27752	34.9895	9.43e-27	3.3e-23	50.6067	FBgn0033207	CG12826	CG12826	CG12826	35710	---	---	---	---
4348	145547_r_at	3.68061	3.3789	20.7333	6.64e-20	3.1e-17	35.4322	FBgn0031277	CG13947	CG13947	CG13947	33250	---	---	---	---
12985	154184_at	3.47962	4.01528	33.165	4.86e-26	1.36e-22	49.0782	FBgn0023129	CG3705	aay	astray	39085	4647 // phosphoserine phosphatase activity // inferred from sequence or structural similarity /// 4647 // phosphoserine phosphatase activity // non-traceable author statement /// 287 // magnesium ion binding // inferred from electronic annotation /// 3824 // catalytic activity // inferred from electronic annotation /// 4647 // phosphoserine phosphatase activity // inferred from electronic annotat…	6563 // L-serine metabolism // inferred from sequence or structural similarity /// 6564 // L-serine biosynthesis // non-traceable author statement /// 7411 // axon guidance // inferred from mutant phenotype /// 7422 // peripheral nervous system development // traceable author statement /// 6564 // L-serine biosynthesis // inferred from electronic annotation /// 8152 // metabolism // inferred from…	---	IPR005834 // Haloacid dehalogenase-like hydrolase // 5.7E-9
4347	145546_i_at	3.40805	4.0455	15.5222	2.7e-16	2.64e-14	27.1497	FBgn0031277	CG13947	CG13947	CG13947	33250	---	---	---	---
1863	143062_at	3.28675	2.01652	28.667	4.13e-24	7.23e-21	44.8719	FBgn0000053	CG31628	ade3	adenosine 3	33986	4637 // phosphoribosylamine-glycine ligase activity // inferred from sequence or structural similarity /// 4637 // phosphoribosylamine-glycine ligase activity // non-traceable author statement /// 4641 // phosphoribosylformylglycinamidine cyclo-ligase activity // inferred from sequence or structural similarity /// 4641 // phosphoribosylformylglycinamidine cyclo-ligase activity // non-traceable au…	6144 // purine base metabolism // inferred from electronic annotation /// 6189 // 'de novo' IMP biosynthesis // inferred from sequence or structural similarity /// 6189 // 'de novo' IMP biosynthesis // non-traceable author statement /// 9113 // purine base biosynthesis // inferred from electronic annotation /// 6189 // 'de novo' IMP biosynthesis // inferred from sequence similarity	5737 // cytoplasm // inferred from electronic annotation	IPR000115 // Phosphoribosylglycinamide synthetase // 7.3E-66 /// IPR010918 // AIR synthase related protein, C-terminal // 1.8E-24 /// IPR010918 // AIR synthase related protein, C-terminal // 1.8E-44 /// IPR002376 // Formyl transferase, N-terminal // 1.6E-101 /// IPR000115 // Phosphoribosylglycinamide synthetase // 2.9E-99 /// IPR000115 // Phosphoribosylglycinamide synthetase // 2.5E-50 /// IPR000…
12562	153761_at	3.22818	3.03911	31.8977	1.6e-25	3.74e-22	47.9596	FBgn0039241	CG11089	CG11089	CG11089	42973	3937 // IMP cyclohydrolase activity // inferred from sequence or structural similarity /// 4643 // phosphoribosylaminoimidazolecarboxamide formyltransferase activity // inferred from sequence or structural similarity /// 3937 // IMP cyclohydrolase activity // inferred from electronic annotation /// 4643 // phosphoribosylaminoimidazolecarboxamide formyltransferase activity // inferred from electro…	6144 // purine base metabolism // inferred from electronic annotation /// 6164 // purine nucleotide biosynthesis // inferred from electronic annotation	---	IPR002695 // AICARFT/IMPCHase bienzyme // 1.0E-126 /// IPR004362 // Methylglyoxal synthase-like domain // 3.3E-49
9503	150702_at	3.20534	2.46073	19.9494	2.05e-19	6.4e-17	34.3145	FBgn0039474	CG6283	CG6283	CG6283	43250	4806 // triacylglycerol lipase activity // inferred from sequence or structural similarity /// 8970 // phospholipase A1 activity // inferred from electronic annotation /// 5515 // protein binding // inferred from physical interaction /// 3824 // catalytic activity // inferred from electronic annotation /// 4806 // triacylglycerol lipase activity // inferred from sequence similarity	6629 // lipid metabolism // inferred from electronic annotation	---	IPR000734 // Lipase // 1.0E-46
9837	151036_f_at	3.16934	0.423338	12.6808	6.64e-14	2.91e-12	21.6106	FBgn0051354 /// FBgn0013277 /// FBgn0013276 /// FBgn0013278 /// FBgn0013279	CG18743 /// CG31449 /// CG5834 /// CG31359 /// CG6489	Hsp70Bbb /// Hsp70Ba /// Hsp70Ab /// Hsp70Bb /// Hsp70Bc	Hsp70Bbb /// Heat-shock-protein-70Ba /// Heat-shock-protein-70Ab /// Heat-shock-protein-70Bb /// Heat-shock-protein-70Bc	44920 /// 44921 /// 48582 /// 48583 /// 50022	5524 // ATP binding // inferred from electronic annotation /// 166 // nucleotide binding // inferred from electronic annotation	6457 // protein folding // inferred from electronic annotation /// 6461 // protein complex assembly // inferred from electronic annotation /// 6952 // defense response // inferred from electronic annotation /// 9408 // response to heat // inferred from sequence or structural similarity /// 9408 // response to heat // non-traceable author statement /// 6986 // response to unfolded protein // infer…	---	IPR001023 // Heat shock protein Hsp70 // 1.0E-126
8557	149756_at	3.11903	2.01697	17.4959	9.14e-18	1.54e-15	30.5378	FBgn0010038	CG4181	GstD2	Glutathione S transferase D2	48335	4364 // glutathione transferase activity // inferred from direct assay /// 4364 // glutathione transferase activity // inferred from sequence or structural similarity /// 4364 // glutathione transferase activity // non-traceable author statement /// 4602 // glutathione peroxidase activity // traceable author statement /// 4364 // glutathione transferase activity // inferred from sequence similari…	6952 // defense response // inferred from electronic annotation /// 9636 // response to toxin // inferred from electronic annotation	---	IPR004046 // Glutathione S-transferase, C-terminal // 8.6E-12 /// IPR004045 // Glutathione S-transferase, N-terminal // 6.4E-18
12233	153432_at	2.93926	4.99825	19.9044	2.19e-19	6.68e-17	34.2491	FBgn0022073	CG8846	Thor	Thor	33569	8190 // eukaryotic initiation factor 4E binding // inferred from direct assay /// 8190 // eukaryotic initiation factor 4E binding // inferred from sequence or structural similarity /// 8190 // eukaryotic initiation factor 4E binding // non-traceable author statement /// 5515 // protein binding // inferred from physical interaction /// 8190 // eukaryotic initiation factor 4E binding // inferred fr…	1558 // regulation of cell growth // inferred from genetic interaction /// 1558 // regulation of cell growth // inferred from mutant phenotype /// 6950 // response to stress // inferred from expression pattern /// 6952 // defense response // non-traceable author statement /// 6955 // immune response // inferred from expression pattern /// 6955 // immune response // inferred from mutant phenotype …	---	IPR008606 // Eukaryotic translation initiation factor 4E binding // 1.0E-80
11533	152732_at	2.83277	2.59607	35.1415	8.25e-27	3.3e-23	50.73	FBgn0036997	CG5955	CG5955	CG5955	40268	3978 // UDP-glucose 4-epimerase activity // inferred from sequence or structural similarity /// 3824 // catalytic activity // inferred from electronic annotation /// 51287 // NAD binding // inferred from electronic annotation /// 3978 // UDP-glucose 4-epimerase activity // inferred from sequence similarity	9225 // nucleotide-sugar metabolism // inferred from electronic annotation	---	---
4108	145307_at	2.75765	1.93395	15.1636	5.17e-16	4.47e-14	26.4962	FBgn0030929	CG15043	CG15043	CG15043	32835	---	---	---	---
12742	153941_at	2.73464	1.41468	7.41981	2.14e-08	1.79e-07	8.80453	FBgn0037724 /// FBgn0003334	CG9434	Fst /// Scm	Frost /// Sex comb on midleg	41168 /// 41169	3682 // chromatin binding // inferred from electronic annotation /// 3704 // specific RNA polymerase II transcription factor activity // non-traceable author statement	9409 // response to cold // inferred from expression pattern /// 9409 // response to cold // non-traceable author statement /// 16458 // gene silencing // inferred from genetic interaction /// 16458 // gene silencing // inferred from mutant phenotype /// 30708 // female germ-line cyst encapsulation (sensu Insecta) // inferred from mutant phenotype /// 30713 // stalk formation (sensu Insecta) // i…	5634 // nucleus // non-traceable author statement /// 35102 // PRC1 complex // traceable author statement	---
10941	152140_at	2.72937	1.1118	23.5436	1.54e-21	1.2e-18	39.1341	FBgn0032935	CG8678	CG8678	CG8678	35396	---	---	5635 // nuclear envelope // inferred from electronic annotation	---
5214	146413_at	2.71082	3.25459	25.7191	1.09e-22	1.28e-19	41.7129	FBgn0032652	CG6870	CG6870	CG6870	35067	16491 // oxidoreductase activity // inferred from electronic annotation /// 5506 // iron ion binding // inferred from electronic annotation /// 46872 // metal ion binding // inferred from electronic annotation	6118 // electron transport // inferred from electronic annotation /// 8202 // steroid metabolism // inferred from electronic annotation	5792 // microsome // inferred from sequence or structural similarity /// 5792 // microsome // inferred from sequence similarity	IPR001199 // Cytochrome b5 // 7.9E-19
13739	154938_at	2.67572	2.38038	10.1284	2.01e-11	4.22e-10	15.8413	FBgn0030013	CG1583	CG1583	CG1583	31747	4623 // phospholipase A2 activity // inferred from sequence or structural similarity /// 5509 // calcium ion binding // inferred from electronic annotation /// 4623 // phospholipase A2 activity // inferred from electronic annotation /// 4623 // phospholipase A2 activity // inferred from sequence similarity	6629 // lipid metabolism // inferred from electronic annotation /// 6644 // phospholipid metabolism // inferred from electronic annotation /// 16042 // lipid catabolism // inferred from electronic annotation	5576 // extracellular region // inferred from electronic annotation	IPR008774 // A2 Phospholipase // 4.1E-70
8583	149782_at	2.60609	1.72579	11.3552	1.17e-12	3.4e-11	18.7161	FBgn0013279 /// FBgn0013278 /// FBgn0013277 /// FBgn0051354	CG31449 /// CG5834 /// CG31359 /// CG6489	Hsp70Bc /// Hsp70Bb /// Hsp70Ba /// Hsp70Bbb	Heat-shock-protein-70Bc /// Heat-shock-protein-70Bb /// Heat-shock-protein-70Ba /// Hsp70Bbb	44921 /// 48582 /// 48583 /// 50022	5524 // ATP binding // inferred from electronic annotation /// 166 // nucleotide binding // inferred from electronic annotation	6457 // protein folding // inferred from electronic annotation /// 6461 // protein complex assembly // inferred from electronic annotation /// 6952 // defense response // inferred from electronic annotation /// 9408 // response to heat // non-traceable author statement /// 9408 // response to heat // inferred from sequence or structural similarity /// 6986 // response to unfolded protein // infer…	---	IPR001023 // Heat shock protein Hsp70 // 1.0E-126
10700	151899_at	2.5163	3.39059	16.8749	2.56e-17	3.66e-15	29.5082	FBgn0036992	CG11796	CG11796	CG11796	40263	3868 // 4-hydroxyphenylpyruvate dioxygenase activity // inferred from sequence or structural similarity /// 5515 // protein binding // inferred from physical interaction /// 3868 // 4-hydroxyphenylpyruvate dioxygenase activity // inferred from electronic annotation /// 3868 // 4-hydroxyphenylpyruvate dioxygenase activity // inferred from sequence similarity	9063 // amino acid catabolism // inferred from electronic annotation /// 9072 // aromatic amino acid family metabolism // inferred from electronic annotation	---	IPR004360 // Glyoxalase/Bleomycin resistance protein/dioxygenase domain // 1.9E-17 /// IPR004360 // Glyoxalase/Bleomycin resistance protein/dioxygenase domain // 1.9E-17
3362	144561_at	2.4908	2.08364	16.1956	8.2e-17	9.57e-15	28.3443	FBgn0029823	CG3011	CG3011	CG3011	31524	4372 // glycine hydroxymethyltransferase activity // inferred from sequence or structural similarity /// 5515 // protein binding // inferred from physical interaction /// 4372 // glycine hydroxymethyltransferase activity // inferred from electronic annotation /// 4372 // glycine hydroxymethyltransferase activity // inferred from sequence similarity	6139 // nucleobase, nucleoside, nucleotide and nucleic acid metabolism // inferred from electronic annotation /// 6544 // glycine metabolism // inferred from electronic annotation /// 6564 // L-serine biosynthesis // inferred from sequence or structural similarity /// 6563 // L-serine metabolism // inferred from electronic annotation /// 6564 // L-serine biosynthesis // inferred from sequence sim…	5739 // mitochondrion // inferred from sequence or structural similarity /// 5739 // mitochondrion // inferred from sequence similarity	IPR001085 // Glycine hydroxymethyltransferase // 1.0E-126
11556	152755_at	2.48426	2.64669	21.6567	1.84e-20	1.03e-17	36.6991	FBgn0033269	CG8709	CG8709	CG8709	35790	---	6629 // lipid metabolism // inferred from electronic annotation /// 7275 // development // inferred from electronic annotation	---	IPR007651 // Lipin, N-terminal conserved region // 1.6E-74
502	141701_at	2.41872	1.69764	19.8291	2.45e-19	7.31e-17	34.1394	FBgn0033205	CG2064	CG2064	CG2064	35708	16491 // oxidoreductase activity // inferred from electronic annotation	8152 // metabolism // inferred from electronic annotation	---	IPR002198 // Short-chain dehydrogenase/reductase SDR // 1.2E-36
3807	145006_at	2.37339	1.4802	10.9786	2.74e-12	7.27e-11	17.8544	FBgn0030482	CG1673	CG1673	CG1673	32297	4084 // branched-chain-amino-acid transaminase activity // inferred from sequence or structural similarity /// 3824 // catalytic activity // inferred from electronic annotation /// 4084 // branched-chain-amino-acid transaminase activity // inferred from electronic annotation /// 4084 // branched-chain-amino-acid transaminase activity // inferred from sequence similarity	9082 // branched chain family amino acid biosynthesis // inferred from sequence or structural similarity /// 8152 // metabolism // inferred from electronic annotation /// 9081 // branched chain family amino acid metabolism // inferred from electronic annotation /// 9082 // branched chain family amino acid biosynthesis // inferred from sequence similarity	5737 // cytoplasm // inferred from sequence or structural similarity /// 5739 // mitochondrion // inferred from sequence or structural similarity /// 5737 // cytoplasm // inferred from sequence similarity /// 5739 // mitochondrion // inferred from sequence similarity	IPR001544 // Aminotransferase, class IV // 4.9E-122
5509	146708_at	2.33612	3.52523	20.4634	9.76e-20	3.6e-17	35.0519	FBgn0029507	CG12846	Tsp42Ed	Tetraspanin 42Ed	35613	---	---	16021 // integral to membrane // inferred from sequence or structural similarity /// 16021 // integral to membrane // inferred from electronic annotation /// 16021 // integral to membrane // inferred from sequence similarity	IPR000301 // CD9/CD37/CD63 antigen // 1.4E-59
2100	143299_at	2.29949	5.8616	14.0636	4.11e-15	2.69e-13	24.4124	FBgn0003067	CG17725	Pepck	Phosphoenolpyruvate carboxykinase	37131	4613 // phosphoenolpyruvate carboxykinase (GTP) activity // inferred from sequence or structural similarity /// 5525 // GTP binding // inferred from electronic annotation /// 166 // nucleotide binding // inferred from electronic annotation /// 4611 // phosphoenolpyruvate carboxykinase activity // inferred from electronic annotation /// 4613 // phosphoenolpyruvate carboxykinase (GTP) activity // i…	6094 // gluconeogenesis // inferred from sequence or structural similarity /// 6094 // gluconeogenesis // non-traceable author statement /// 6094 // gluconeogenesis // inferred from electronic annotation /// 6094 // gluconeogenesis // inferred from sequence similarity	5739 // mitochondrion // inferred from sequence or structural similarity /// 5739 // mitochondrion // inferred from sequence similarity	IPR008209 // Phosphoenolpyruvate carboxykinase (GTP) // 1.0E-126 /// IPR008209 // Phosphoenolpyruvate carboxykinase (GTP) // 1.0E-126
10790	151989_at	2.29439	4.18804	15.0366	6.53e-16	5.45e-14	26.2619	FBgn0031645	CG3036	CG3036	CG3036	33695	5436 // sodium:phosphate symporter activity // inferred from sequence or structural similarity /// 5215 // transporter activity // inferred from electronic annotation /// 5436 // sodium:phosphate symporter activity // inferred from sequence similarity	5975 // carbohydrate metabolism // inferred from electronic annotation /// 6796 // phosphate metabolism // inferred from electronic annotation /// 6812 // cation transport // inferred from electronic annotation /// 6817 // phosphate transport // inferred from sequence or structural similarity /// 6858 // extracellular transport // inferred from electronic annotation /// 8643 // carbohydrate trans…	16021 // integral to membrane // inferred from sequence or structural similarity /// 16020 // membrane // inferred from electronic annotation /// 16021 // integral to membrane // inferred from electronic annotation /// 16021 // integral to membrane // inferred from sequence similarity	---
8595	149794_at	2.28673	4.21484	18.733	1.28e-18	3.2e-16	32.4975	FBgn0038074	CG6188	CG6188	CG6188	41561	17174 // glycine N-methyltransferase activity // inferred from sequence or structural similarity /// 8168 // methyltransferase activity // inferred from electronic annotation /// 8757 // S-adenosylmethionine-dependent methyltransferase activity // inferred from electronic annotation /// 16740 // transferase activity // inferred from electronic annotation /// 17174 // glycine N-methyltransferase a…	8652 // amino acid biosynthesis // inferred from electronic annotation	---	---
5380	146579_at	2.2849	0.649418	29.3241	2.08e-24	4.15e-21	45.5294	FBgn0032934	CG8679	CG8679	CG8679	35395	---	---	5635 // nuclear envelope // inferred from electronic annotation	IPR003887 // Lamino-associated polypeptide 2/emerin // 2.7E-20 /// IPR002110 // Ankyrin // 27.0 /// IPR002110 // Ankyrin // 1.2E-7 /// IPR002110 // Ankyrin // 2.3
12815	154014_at	2.27637	1.47154	19.0908	7.4e-19	1.99e-16	33.0428	FBgn0032130	CG3838	CG3838	CG3838	34275	3677 // DNA binding // inferred from electronic annotation /// 5515 // protein binding // inferred from physical interaction	---	---	IPR004210 // BESS motif // 2.3E-13
9409	150608_at	2.27014	0.401989	9.3055	1.51e-10	2.44e-09	13.8028	FBgn0066101	CG31094	LpR1	LpR1	2768687	5041 // low-density lipoprotein receptor activity // inferred from sequence or structural similarity /// 5509 // calcium ion binding // inferred from electronic annotation /// 8034 // lipoprotein binding // inferred from sequence or structural similarity /// 5041 // low-density lipoprotein receptor activity // inferred from sequence similarity /// 8034 // lipoprotein binding // inferred from sequ…	8203 // cholesterol metabolism // inferred from sequence or structural similarity /// 42953 // lipoprotein transport // inferred from sequence or structural similarity /// 8203 // cholesterol metabolism // inferred from sequence similarity /// 42953 // lipoprotein transport // inferred from sequence similarity	16020 // membrane // inferred from sequence or structural similarity /// 16020 // membrane // inferred from electronic annotation /// 16020 // membrane // inferred from sequence similarity	IPR006209 // EGF-like domain // 2.5E-7 /// IPR002172 // Low density lipoprotein-receptor, class A // 6.5E-17 /// IPR002172 // Low density lipoprotein-receptor, class A // 2.0E-19 /// IPR002172 // Low density lipoprotein-receptor, class A // 4.1E-16 /// IPR002172 // Low density lipoprotein-receptor, class A // 4.2E-18 /// IPR002172 // Low density lipoprotein-receptor, class A // 1.6E-17 /// IPR002…
7931	149130_at	2.23949	0.053695	23.3369	2.01e-21	1.41e-18	38.8768	FBgn0036995	CG5195	CG5195	CG5195	40266	166 // nucleotide binding // inferred from electronic annotation /// 3677 // DNA binding // inferred from electronic annotation /// 3887 // DNA-directed DNA polymerase activity // inferred from electronic annotation /// 8408 // 3'-5' exonuclease activity // inferred from electronic annotation	6260 // DNA replication // inferred from electronic annotation /// 7155 // cell adhesion // inferred from electronic annotation /// 19226 // transmission of nerve impulse // inferred from electronic annotation	---	IPR001611 // Leucine-rich repeat // 0.0019 /// IPR001611 // Leucine-rich repeat // 0.0021 /// IPR001611 // Leucine-rich repeat // 0.024 /// IPR001611 // Leucine-rich repeat // 0.2 /// IPR001611 // Leucine-rich repeat // 0.0032 /// IPR001611 // Leucine-rich repeat // 0.038 /// IPR001611 // Leucine-rich repeat // 0.014 /// IPR001611 // Leucine-rich repeat // 9.5E-4 /// IPR001611 // Leucine-rich rep…
8769	149968_at	2.23009	3.37929	13.8116	6.72e-15	4.03e-13	23.9176	FBgn0038353	CG5399	CG5399	CG5399	41900	---	---	---	---
7285	148484_at	2.22579	3.43151	11.5309	7.89e-13	2.42e-11	19.1123	FBgn0036030	CG6767	CG6767	CG6767	39132	4749 // ribose phosphate diphosphokinase activity // inferred from sequence or structural similarity /// 16978 // lipoate-protein ligase B activity // inferred from electronic annotation /// 19201 // nucleotide kinase activity // inferred from electronic annotation /// 5515 // protein binding // inferred from physical interaction /// 42802 // identical protein binding // inferred from physical in…	6144 // purine base metabolism // inferred from electronic annotation /// 6206 // pyrimidine base metabolism // inferred from electronic annotation /// 9116 // nucleoside metabolism // inferred from electronic annotation /// 9156 // ribonucleoside monophosphate biosynthesis // inferred from electronic annotation /// 9165 // nucleotide biosynthesis // inferred from electronic annotation	---	IPR000836 // Phosphoribosyltransferase // 4.6E-38 /// IPR000836 // Phosphoribosyltransferase // 4.6E-38
6251	147450_at	2.21236	1.75223	17.1197	1.7e-17	2.65e-15	29.9178	FBgn0034364	CG5493	CG5493	CG5493	37139	17172 // cysteine dioxygenase activity // inferred from sequence or structural similarity /// 17172 // cysteine dioxygenase activity // inferred from sequence similarity	9063 // amino acid catabolism // inferred from electronic annotation	---	IPR010300 // Cysteine dioxygenase type I // 4.1E-118
5058	146257_at	2.20125	2.71534	16.8091	2.86e-17	3.93e-15	29.3972	FBgn0032382	CG14935	CG14935	CG14935	34598	4556 // alpha-amylase activity // inferred from electronic annotation /// 4558 // alpha-glucosidase activity // inferred from sequence or structural similarity /// 5215 // transporter activity // inferred from electronic annotation /// 4558 // alpha-glucosidase activity // inferred from sequence similarity	5975 // carbohydrate metabolism // inferred from electronic annotation	---	IPR006047 // Alpha amylase, catalytic domain // 3.7E-113 /// IPR006047 // Alpha amylase, catalytic domain // 3.7E-113
13945	155144_at	2.19847	3.79262	20.6904	7.06e-20	3.19e-17	35.372	FBgn0041342	CG1049	Cct1	CTP:phosphocholine cytidylyltransferase 1	117353	4105 // choline-phosphate cytidylyltransferase activity // inferred from sequence or structural similarity /// 16779 // nucleotidyltransferase activity // inferred from electronic annotation /// 4105 // choline-phosphate cytidylyltransferase activity // inferred from sequence similarity	1654 // eye development // inferred from mutant phenotype /// 6644 // phospholipid metabolism // inferred from electronic annotation /// 6897 // endocytosis // inferred from mutant phenotype /// 7476 // wing morphogenesis // inferred from mutant phenotype /// 8340 // determination of adult life span // inferred from mutant phenotype /// 9058 // biosynthesis // inferred from electronic annotation …	---	IPR004820 // Cytidylyltransferase // 4.5E-30
12739	153938_at	2.13312	2.47274	16.2498	7.46e-17	8.86e-15	28.4386	FBgn0010715	CG10967	Atg1	Autophagy-specific gene 1	39454	4672 // protein kinase activity // non-traceable author statement /// 4674 // protein serine/threonine kinase activity // inferred from sequence or structural similarity /// 4702 // receptor signaling protein serine/threonine kinase activity // inferred from electronic annotation /// 4713 // protein-tyrosine kinase activity // inferred from electronic annotation /// 5524 // ATP binding // inferre…	6468 // protein amino acid phosphorylation // non-traceable author statement /// 6914 // autophagy // inferred from mutant phenotype /// 7242 // intracellular signaling cascade // inferred from electronic annotation /// 6468 // protein amino acid phosphorylation // inferred from electronic annotation	---	IPR000719 // Protein kinase // 1.5E-80
13133	154332_at	2.12083	2.80586	24.2485	6.39e-22	5.6e-19	39.9949	FBgn0039541	CG12876	CG12876	CG12876	43330	4871 // signal transducer activity // inferred from sequence or structural similarity /// 5057 // receptor signaling protein activity // inferred from electronic annotation /// 5515 // protein binding // inferred from physical interaction /// 4871 // signal transducer activity // inferred from sequence similarity	6917 // induction of apoptosis // inferred from electronic annotation /// 7165 // signal transduction // inferred from electronic annotation	---	IPR004328 // BRO1 // 6.1E-84
11945	153144_at	2.1188	3.20177	14.3305	2.46e-15	1.71e-13	24.9294	FBgn0014455	CG11654	Ahcy13	Adenosylhomocysteinase at 13	32471	4013 // adenosylhomocysteinase activity // inferred from sequence or structural similarity /// 4013 // adenosylhomocysteinase activity // non-traceable author statement /// 4013 // adenosylhomocysteinase activity // inferred from electronic annotation /// 16787 // hydrolase activity // inferred from electronic annotation /// 4013 // adenosylhomocysteinase activity // inferred from sequence simila…	6144 // purine base metabolism // inferred from electronic annotation /// 6730 // one-carbon compound metabolism // inferred from electronic annotation	---	IPR000043 // S-adenosyl-L-homocysteine hydrolase // 2.6E-116 /// IPR000043 // S-adenosyl-L-homocysteine hydrolase // 7.9E-88 /// IPR000043 // S-adenosyl-L-homocysteine hydrolase // 6.4E-69
9408	150607_at	2.0772	1.46518	18.3882	2.19e-18	4.84e-16	31.963	FBgn0066101	CG31094	LpR1	LpR1	2768687	5041 // low-density lipoprotein receptor activity // inferred from sequence or structural similarity /// 5509 // calcium ion binding // inferred from electronic annotation /// 8034 // lipoprotein binding // inferred from sequence or structural similarity /// 5041 // low-density lipoprotein receptor activity // inferred from sequence similarity /// 8034 // lipoprotein binding // inferred from sequ…	8203 // cholesterol metabolism // inferred from sequence or structural similarity /// 42953 // lipoprotein transport // inferred from sequence or structural similarity /// 8203 // cholesterol metabolism // inferred from sequence similarity /// 42953 // lipoprotein transport // inferred from sequence similarity	16020 // membrane // inferred from sequence or structural similarity /// 16020 // membrane // inferred from electronic annotation /// 16020 // membrane // inferred from sequence similarity	IPR006209 // EGF-like domain // 2.5E-7 /// IPR002172 // Low density lipoprotein-receptor, class A // 2.0E-19 /// IPR002172 // Low density lipoprotein-receptor, class A // 4.1E-16 /// IPR002172 // Low density lipoprotein-receptor, class A // 4.2E-18 /// IPR002172 // Low density lipoprotein-receptor, class A // 1.6E-17 /// IPR002172 // Low density lipoprotein-receptor, class A // 4.1E-14 /// IPR002…
8560	149759_at	2.05803	0.678301	22.4562	6.3e-21	3.68e-18	37.7549	FBgn0010041	CG12242	GstD5	Glutathione S transferase D5	48338	4364 // glutathione transferase activity // inferred from sequence or structural similarity /// 4364 // glutathione transferase activity // non-traceable author statement /// 4364 // glutathione transferase activity // inferred from sequence similarity	---	---	IPR004046 // Glutathione S-transferase, C-terminal // 1.9E-10 /// IPR004045 // Glutathione S-transferase, N-terminal // 9.0E-17
13875	155074_at	2.04422	3.11511	18.1323	3.28e-18	6.34e-16	31.5607	FBgn0038256	CG7530	CG7530	CG7530	41784	---	---	16021 // integral to membrane // inferred from electronic annotation	IPR004254 // Hly-III related proteins // 1.6E-80
12185	153384_at	2.00433	1.5114	20.3854	1.09e-19	3.92e-17	34.9411	FBgn0031695	CG14031	Cyp4ac3	Cyp4ac3	33756	4497 // monooxygenase activity // inferred from electronic annotation /// 16491 // oxidoreductase activity // inferred from electronic annotation /// 5506 // iron ion binding // inferred from electronic annotation /// 20037 // heme binding // inferred from electronic annotation /// 46872 // metal ion binding // inferred from electronic annotation	6118 // electron transport // inferred from electronic annotation	5792 // microsome // non-traceable author statement /// 16020 // membrane // non-traceable author statement /// 5783 // endoplasmic reticulum // inferred from electronic annotation /// 5792 // microsome // inferred from electronic annotation /// 16020 // membrane // inferred from electronic annotation	IPR001128 // Cytochrome P450 // 1.5E-98
5086	146285_at	1.99939	2.25696	15.1242	5.56e-16	4.71e-14	26.4238	FBgn0043841	CG31764	vir-1	virus-induced RNA 1	34652	---	---	---	---
13098	154297_at	1.99671	1.47655	19.9775	1.97e-19	6.4e-17	34.3553	FBgn0032467	CG9934	CG9934	CG9934	34699	4842 // ubiquitin-protein ligase activity // inferred from electronic annotation /// 5515 // protein binding // inferred from physical interaction	6511 // ubiquitin-dependent protein catabolism // inferred from sequence or structural similarity /// 6950 // response to stress // inferred from electronic annotation /// 6952 // defense response // inferred from electronic annotation /// 16567 // protein ubiquitination // inferred from electronic annotation /// 6511 // ubiquitin-dependent protein catabolism // inferred from sequence similarity	151 // ubiquitin ligase complex // inferred from electronic annotation	IPR003613 // Zn-finger, modified RING // 1.3E-58
11522	152721_at	1.98393	2.66617	25.0759	2.34e-22	2.34e-19	40.974	FBgn0020416	CG4472	Idgf1	Imaginal disc growth factor 1	34978	4568 // chitinase activity // inferred from sequence or structural similarity /// 8084 // imaginal disc growth factor activity // inferred from direct assay /// 16799 // hydrolase activity, hydrolyzing N-glycosyl compounds // inferred from electronic annotation /// 4553 // hydrolase activity, hydrolyzing O-glycosyl compounds // inferred from electronic annotation /// 4568 // chitinase activity //…	7165 // signal transduction // inferred from electronic annotation /// 7267 // cell-cell signaling // inferred from electronic annotation /// 7444 // imaginal disc development // inferred from direct assay /// 8152 // metabolism // inferred from electronic annotation /// 5975 // carbohydrate metabolism // inferred from electronic annotation /// 6032 // chitin catabolism // inferred from electroni…	5576 // extracellular region // inferred from direct assay /// 5576 // extracellular region // non-traceable author statement	IPR001223 // Glycoside hydrolase, family 18 // 7.9E-86
34	141233_at	1.97936	2.76223	13.3195	1.79e-14	9.5e-13	22.9312	FBgn0029831	CG5966	CG5966	CG5966	31532	4806 // triacylglycerol lipase activity // inferred from sequence or structural similarity /// 3824 // catalytic activity // inferred from electronic annotation /// 4806 // triacylglycerol lipase activity // inferred from sequence similarity	6629 // lipid metabolism // inferred from electronic annotation	---	IPR000734 // Lipase // 5.1E-77
11516	152715_at	1.96799	3.6711	19.4227	4.48e-19	1.28e-16	33.5405	FBgn0033188	CG1600	CG1600	CG1600	35687	4024 // alcohol dehydrogenase activity, zinc-dependent // inferred from electronic annotation /// 8270 // zinc ion binding // inferred from electronic annotation /// 16491 // oxidoreductase activity // inferred from electronic annotation	---	---	IPR002085 // Zinc-containing alcohol dehydrogenase superfamily // 5.0E-25 /// IPR002085 // Zinc-containing alcohol dehydrogenase superfamily // 5.0E-25
11235	152434_at	1.95476	1.61688	14.9314	7.94e-16	6.54e-14	26.0665	FBgn0051004	CG31004	CG31004	CG31004	43688	---	7160 // cell-matrix adhesion // inferred from electronic annotation	---	IPR010362 // Nid // 3.9E-36 /// IPR005533 // AMOP domain // 7.2E-87 /// IPR001846 // von Willebrand factor, type D // 1.4E-9 /// IPR001846 // von Willebrand factor, type D // 3.5E-5 /// IPR000436 // Sushi domain/SCR domain/CCP module // 6.2E-8
12229	153428_at	1.95391	4.73518	23.3976	1.86e-21	1.37e-18	38.9526	FBgn0020513	CG3989	ade5	ade5	32228	4638 // phosphoribosylaminoimidazole carboxylase activity // inferred from sequence or structural similarity /// 4639 // phosphoribosylaminoimidazolesuccinocarboxamide synthase activity // inferred from sequence or structural similarity /// 42802 // identical protein binding // inferred from physical interaction /// 3824 // catalytic activity // inferred from electronic annotation /// 4638 // pho…	6144 // purine base metabolism // inferred from electronic annotation /// 6164 // purine nucleotide biosynthesis // inferred from electronic annotation /// 6189 // 'de novo' IMP biosynthesis // inferred from electronic annotation /// 9113 // purine base biosynthesis // inferred from genetic interaction	9320 // phosphoribosylaminoimidazole carboxylase complex // inferred from electronic annotation	IPR001636 // SAICAR synthetase // 2.4E-96 /// IPR000031 // 1-(5-Phosphoribosyl)-5-amino-4-imidazole-carboxylate (AIR) carboxylase // 2.8E-50
13644	154843_at	1.91348	2.59885	17.9956	4.08e-18	7.62e-16	31.3436	FBgn0035850	CG7986	Atg18	Autophagy-specific gene 18	38913	---	6914 // autophagy // inferred from mutant phenotype	---	---
12599	153798_at	1.89344	2.77582	15.871	1.45e-16	1.56e-14	27.7737	FBgn0035715	CG10103	CG10103	CG10103	38750	3676 // nucleic acid binding // inferred from electronic annotation /// 4522 // pancreatic ribonuclease activity // inferred from electronic annotation /// 5515 // protein binding // inferred from physical interaction	---	---	IPR005061 // Eukaryotic protein of unknown function DUF292 // 1.7E-75
1538	142737_at	1.83762	2.76036	8.17155	2.82e-09	3.17e-08	10.8493	FBgn0037007	CG5059	CG5059	CG5059	40278	---	---	---	---
5165	146364_at	1.83741	0.585142	11.2011	1.65e-12	4.66e-11	18.3657	FBgn0032587	CG5953	CG5953	CG5953	34985	5515 // protein binding // inferred from physical interaction /// 42802 // identical protein binding // inferred from physical interaction	---	---	---
5615	146814_at	1.80954	1.96618	10.6117	6.4e-12	1.55e-10	16.9972	FBgn0033301	CG12780	CG12780	CG12780	35834	8368 // Gram-negative bacterial binding // inferred from sequence or structural similarity /// 15926 // glucosidase activity // inferred from electronic annotation /// 8368 // Gram-negative bacterial binding // inferred from sequence similarity	5976 // polysaccharide metabolism // inferred from electronic annotation /// 6952 // defense response // inferred from electronic annotation	---	---
10623	151822_at	1.79173	2.08941	11.4756	8.92e-13	2.69e-11	18.988	FBgn0014018	CG11992	Rel	Relish	41087	3700 // transcription factor activity // non-traceable author statement /// 3700 // transcription factor activity // traceable author statement /// 3704 // specific RNA polymerase II transcription factor activity // non-traceable author statement /// 5515 // protein binding // inferred from physical interaction /// 30528 // transcription regulator activity // inferred from electronic annotation /…	6357 // regulation of transcription from RNA polymerase II promoter // inferred from electronic annotation /// 6955 // immune response // inferred from expression pattern /// 6955 // immune response // traceable author statement /// 6963 // antibacterial polypeptide induction // inferred from expression pattern /// 6963 // antibacterial polypeptide induction // inferred from mutant phenotype /// …	5634 // nucleus // inferred from direct assay /// 5634 // nucleus // non-traceable author statement /// 5737 // cytoplasm // inferred from direct assay /// 5739 // mitochondrion // inferred from sequence or structural similarity /// 5739 // mitochondrion // inferred from electronic annotation /// 5634 // nucleus // inferred from electronic annotation	IPR000451 // NF-kappa-B/Rel/dorsal // 1.1E-98 /// IPR002110 // Ankyrin // 4.1E-7 /// IPR002110 // Ankyrin // 3.9E-4 /// IPR002110 // Ankyrin // 3.5E-5 /// IPR002110 // Ankyrin // 0.058 /// IPR002110 // Ankyrin // 6.7 /// IPR002909 // Cell surface receptor IPT/TIG // 5.5E-8 /// IPR000451 // NF-kappa-B/Rel/dorsal // 1.1E-98 /// IPR002110 // Ankyrin // 4.1E-7 /// IPR002110 // Ankyrin // 3.9E-4 /// I…
9160	150359_at	1.77968	1.86842	16.1105	9.51e-17	1.08e-14	28.1956	FBgn0038957	CG7059	CG7059	CG7059	42626	4619 // phosphoglycerate mutase activity // inferred from sequence or structural similarity /// 5198 // structural molecule activity // inferred from electronic annotation /// 5515 // protein binding // inferred from physical interaction /// 3824 // catalytic activity // inferred from electronic annotation /// 16868 // intramolecular transferase activity, phosphotransferases // inferred from elec…	6096 // glycolysis // inferred from electronic annotation /// 7018 // microtubule-based movement // inferred from electronic annotation /// 8152 // metabolism // inferred from electronic annotation	5874 // microtubule // inferred from electronic annotation	IPR001345 // Phosphoglycerate/bisphosphoglycerate mutase // 1.2E-66 /// IPR001345 // Phosphoglycerate/bisphosphoglycerate mutase // 1.2E-66 /// IPR001345 // Phosphoglycerate/bisphosphoglycerate mutase // 1.2E-66
12556	153755_at	1.76884	2.3435	19.9522	2.05e-19	6.4e-17	34.3185	FBgn0030850	CG8408	CG8408	CG8408	32737	---	---	---	---
12485	153684_at	1.76578	2.86762	18.1598	3.14e-18	6.28e-16	31.6042	FBgn0000250	CG5848	cact	cactus	34969	5515 // protein binding // inferred from physical interaction /// 8134 // transcription factor binding // traceable author statement /// 30528 // transcription regulator activity // inferred from electronic annotation	6357 // regulation of transcription from RNA polymerase II promoter // inferred from electronic annotation /// 6916 // anti-apoptosis // inferred from electronic annotation /// 6952 // defense response // non-traceable author statement /// 6952 // defense response // traceable author statement /// 6955 // immune response // traceable author statement /// 6960 // antimicrobial humoral response (se…	5737 // cytoplasm // inferred from direct assay /// 5737 // cytoplasm // non-traceable author statement /// 5737 // cytoplasm // traceable author statement	IPR002110 // Ankyrin // 2.2E-9 /// IPR002110 // Ankyrin // 1.3E-6 /// IPR002110 // Ankyrin // 6.3E-4 /// IPR002110 // Ankyrin // 3.6E-8 /// IPR002110 // Ankyrin // 2.6E-5
5747	146946_s_at	1.75526	3.77399	12.5122	9.45e-14	3.88e-12	21.2543	FBgn0033521 /// FBgn0033520 /// FBgn0033518	CG11765 /// CG12405 /// CG12896	CG12896 /// Prx2540-1 /// Prx2540-2	CG12896 /// Peroxiredoxin 2540 /// Peroxiredoxin 2540	246663 /// 36098 /// 36101	4601 // peroxidase activity // inferred from sequence or structural similarity /// 4601 // peroxidase activity // non-traceable author statement /// 4602 // glutathione peroxidase activity // inferred from sequence or structural similarity /// 16209 // antioxidant activity // inferred from sequence or structural similarity /// 16209 // antioxidant activity // non-traceable author statement /// 46…	6800 // oxygen and reactive oxygen species metabolism // inferred from electronic annotation /// 6952 // defense response // inferred from electronic annotation /// 7498 // mesoderm development // inferred from expression pattern	---	IPR000866 // Alkyl hydroperoxide reductase/ Thiol specific antioxidant/ Mal allergen // 5.7E-50 /// IPR000866 // Alkyl hydroperoxide reductase/ Thiol specific antioxidant/ Mal allergen // 5.4E-50
11951	153150_at	1.7517	2.90208	17.0481	1.92e-17	2.92e-15	29.7986	FBgn0014427	CG11899	CG11899	CG11899	46391	4648 // phosphoserine transaminase activity // inferred from sequence or structural similarity /// 4648 // phosphoserine transaminase activity // non-traceable author statement /// 5515 // protein binding // inferred from physical interaction /// 8483 // transaminase activity // inferred from electronic annotation /// 4648 // phosphoserine transaminase activity // inferred from electronic annotat…	6564 // L-serine biosynthesis // non-traceable author statement /// 8615 // pyridoxine biosynthesis // non-traceable author statement /// 6564 // L-serine biosynthesis // inferred from electronic annotation /// 8152 // metabolism // inferred from electronic annotation /// 8652 // amino acid biosynthesis // inferred from electronic annotation	---	IPR000192 // Aminotransferase, class V // 1.6E-86
12859	154058_at	1.74738	2.51867	15.2262	4.61e-16	4.09e-14	26.6111	FBgn0036449	CG5295	CG5295	CG5295	39611	5515 // protein binding // inferred from physical interaction	6629 // lipid metabolism // inferred from electronic annotation	---	IPR002641 // Patatin // 4.6E-38
7548	148747_at	1.70602	3.09285	6.55086	2.41e-07	1.43e-06	6.36855	FBgn0036419	CG13482	CG13482	CG13482	39577	---	---	---	---
5823	147022_at	1.69617	0.752555	9.74582	5.08e-11	9.43e-10	14.9047	FBgn0040503	CG7763	CG7763	CG7763	36235	5529 // sugar binding // inferred from electronic annotation	---	---	IPR001304 // C-type lectin // 2.6E-18
5926	147125_at	1.69222	2.85333	9.69731	5.72e-11	1.04e-09	14.7846	FBgn0033787	CG13321	CG13321	CG13321	36430	5515 // protein binding // inferred from physical interaction	---	---	---
11681	152880_at	1.69043	3.30742	16.4004	5.75e-17	7.26e-15	28.6994	FBgn0033765	CG8772	nemy	no extended memory	36396	4359 // glutaminase activity // inferred from sequence or structural similarity /// 5515 // protein binding // inferred from physical interaction /// 4359 // glutaminase activity // inferred from electronic annotation /// 5509 // calcium ion binding // inferred from electronic annotation /// 4359 // glutaminase activity // inferred from sequence similarity	6541 // glutamine metabolism // inferred from sequence or structural similarity /// 7613 // memory // inferred from mutant phenotype /// 7626 // locomotory behavior // inferred from mutant phenotype /// 6541 // glutamine metabolism // inferred from electronic annotation /// 6541 // glutamine metabolism // inferred from sequence similarity	5739 // mitochondrion // inferred from sequence or structural similarity /// 5739 // mitochondrion // inferred from sequence similarity	IPR002110 // Ankyrin // 9.4E-9 /// IPR007043 // Glutaminase // 1.0E-126 /// IPR002110 // Ankyrin // 9.4E-9 /// IPR007043 // Glutaminase // 1.0E-126 /// IPR002110 // Ankyrin // 9.4E-9 /// IPR007043 // Glutaminase // 1.0E-126 /// IPR002110 // Ankyrin // 9.4E-9 /// IPR007043 // Glutaminase // 1.0E-126 /// IPR002110 // Ankyrin // 9.4E-9 /// IPR007043 // Glutaminase // 1.0E-126
6399	147598_at	1.66853	0.21417	12.213	1.78e-13	6.73e-12	20.6134	FBgn0022700	CG3986	Cht4	Chitinase 4	49815	4568 // chitinase activity // inferred from sequence or structural similarity /// 4568 // chitinase activity // non-traceable author statement /// 8061 // chitin binding // inferred from electronic annotation /// 8083 // growth factor activity // inferred from electronic annotation /// 16799 // hydrolase activity, hydrolyzing N-glycosyl compounds // inferred from electronic annotation /// 4553 //…	6036 // cuticle chitin catabolism // inferred from sequence or structural similarity /// 7165 // signal transduction // inferred from electronic annotation /// 7267 // cell-cell signaling // inferred from electronic annotation /// 5975 // carbohydrate metabolism // inferred from electronic annotation /// 6030 // chitin metabolism // inferred from electronic annotation /// 6032 // chitin catabolis…	5576 // extracellular region // inferred from electronic annotation	IPR001223 // Glycoside hydrolase, family 18 // 1.6E-115 /// IPR002557 // Chitin binding Peritrophin-A // 8.1E-15
12884	154083_at	1.64855	2.29915	14.7926	1.03e-15	8.23e-14	25.8071	FBgn0019890	CG8954	Smg5	Smg5	34804	---	184 // mRNA catabolism, nonsense-mediated decay // inferred from mutant phenotype	---	---
245	141444_at	1.6262	1.85719	11.9712	3e-13	1.06e-11	20.0877	FBgn0030357	CG2471	CG2471	CG2471	32156	---	---	---	IPR001611 // Leucine-rich repeat // 6.9E-4 /// IPR001611 // Leucine-rich repeat // 0.094
3608	144807_at	1.61726	1.68034	4.88232	2.91e-05	9.55e-05	1.58648	FBgn0052687	CG32687	CG32687	CG32687	31980	4672 // protein kinase activity // inferred from electronic annotation /// 4675 // transmembrane receptor protein serine/threonine kinase activity // inferred from electronic annotation /// 4872 // receptor activity // inferred from electronic annotation /// 16301 // kinase activity // inferred from electronic annotation /// 19199 // transmembrane receptor protein kinase activity // inferred from…	6464 // protein modification // inferred from electronic annotation /// 6468 // protein amino acid phosphorylation // inferred from electronic annotation /// 6952 // defense response // inferred from electronic annotation /// 7165 // signal transduction // inferred from electronic annotation /// 7166 // cell surface receptor linked signal transduction // inferred from electronic annotation /// 71…	---	IPR001611 // Leucine-rich repeat // 3.3E-4 /// IPR001611 // Leucine-rich repeat // 2.1E-4 /// IPR001611 // Leucine-rich repeat // 0.0040 /// IPR001611 // Leucine-rich repeat // 0.045 /// IPR001611 // Leucine-rich repeat // 0.23 /// IPR001611 // Leucine-rich repeat // 0.011
6752	147951_at	1.61398	2.06916	8.03586	4.04e-09	4.29e-08	10.4851	FBgn0035176	CG13905	CG13905	CG13905	38107	---	---	---	---
3607	144806_at	1.60175	1.346	5.91184	1.49e-06	6.95e-06	4.54214	FBgn0052687	CG32687	CG32687	CG32687	31980	4672 // protein kinase activity // inferred from electronic annotation /// 4675 // transmembrane receptor protein serine/threonine kinase activity // inferred from electronic annotation /// 4872 // receptor activity // inferred from electronic annotation /// 16301 // kinase activity // inferred from electronic annotation /// 19199 // transmembrane receptor protein kinase activity // inferred from…	6464 // protein modification // inferred from electronic annotation /// 6468 // protein amino acid phosphorylation // inferred from electronic annotation /// 6952 // defense response // inferred from electronic annotation /// 7165 // signal transduction // inferred from electronic annotation /// 7166 // cell surface receptor linked signal transduction // inferred from electronic annotation /// 71…	---	IPR001611 // Leucine-rich repeat // 3.3E-4 /// IPR001611 // Leucine-rich repeat // 2.1E-4 /// IPR001611 // Leucine-rich repeat // 0.0040 /// IPR001611 // Leucine-rich repeat // 0.045 /// IPR001611 // Leucine-rich repeat // 0.23 /// IPR001611 // Leucine-rich repeat // 0.011
11258	152457_at	1.59894	1.62944	14.6271	1.4e-15	1.06e-13	25.4951	FBgn0035985	CG3672	CG3672	CG3672	39081	42302 // structural constituent of cuticle // inferred from electronic annotation	---	---	IPR000618 // Insect cuticle protein // 5.1E-5
12019	153218_at	1.59667	2.34001	18.2738	2.62e-18	5.57e-16	31.7838	FBgn0034709	CG3074	CG3074	CG3074	37537	4213 // cathepsin B activity // inferred from sequence or structural similarity /// 5515 // protein binding // inferred from physical interaction /// 4197 // cysteine-type endopeptidase activity // inferred from electronic annotation /// 8234 // cysteine-type peptidase activity // inferred from electronic annotation /// 4213 // cathepsin B activity // inferred from sequence similarity	6508 // proteolysis // inferred from electronic annotation /// 19538 // protein metabolism // inferred from electronic annotation	---	IPR000668 // Peptidase C1A, papain // 4.3E-75
11029	152228_at	1.57746	3.23782	15.7746	1.72e-16	1.84e-14	27.6024	FBgn0021872	CG9415	Xbp1	X box binding protein-1	44226	3700 // transcription factor activity // inferred from sequence or structural similarity /// 42803 // protein homodimerization activity // inferred from sequence or structural similarity /// 3677 // DNA binding // inferred from electronic annotation /// 43565 // sequence-specific DNA binding // inferred from electronic annotation /// 46983 // protein dimerization activity // inferred from electro…	6355 // regulation of transcription, DNA-dependent // inferred from electronic annotation /// 45449 // regulation of transcription // inferred from sequence or structural similarity /// 45449 // regulation of transcription // inferred from sequence similarity	5634 // nucleus // inferred from sequence or structural similarity /// 5634 // nucleus // inferred from electronic annotation /// 5634 // nucleus // inferred from sequence similarity	IPR004827 // Basic-leucine zipper (bZIP) transcription factor // 5.2E-8
3514	144713_at	1.57643	2.36608	7.31418	2.86e-08	2.29e-07	8.5122	FBgn0030060	CG2004	CG2004	CG2004	31809	16301 // kinase activity // inferred from electronic annotation /// 16740 // transferase activity // inferred from electronic annotation	---	---	IPR004119 // Protein of unknown function DUF227 // 2.4E-92
458	141657_at	1.55654	0.716291	21.4257	2.53e-20	1.31e-17	36.387	FBgn0030216	CG33175	spri	sprint	31987	17016 // Ras GTPase binding // inferred from sequence or structural similarity /// 5515 // protein binding // inferred from physical interaction /// 5096 // GTPase activator activity // inferred from electronic annotation /// 17016 // Ras GTPase binding // inferred from sequence similarity	6897 // endocytosis // inferred from sequence or structural similarity /// 7242 // intracellular signaling cascade // inferred from electronic annotation /// 7165 // signal transduction // inferred from electronic annotation /// 7275 // development // inferred from electronic annotation /// 6897 // endocytosis // inferred from sequence similarity	---	IPR003123 // Vacuolar sorting protein 9 // 1.9E-28 /// IPR000980 // SH2 motif // 2.8E-20 /// IPR000159 // RA domain // 1.8E-24 /// IPR003123 // Vacuolar sorting protein 9 // 1.9E-28 /// IPR000980 // SH2 motif // 2.8E-20 /// IPR000159 // RA domain // 1.8E-24
12209	153408_at	1.54988	2.17127	17.0306	1.97e-17	2.97e-15	29.7693	FBgn0051324	CG31324	CG31324	CG31324	43177	---	---	---	---
4031	145230_at	1.53853	2.92269	4.64727	5.72e-05	0.000175965	0.918663	FBgn0030821	CG5010	CG5010	CG5010	32701	---	---	---	IPR010625 // CHCH // 8.7E-11
8402	149601_at	1.53191	0.446548	11.6026	6.73e-13	2.11e-11	19.2727	FBgn0053975	---	CG33975	CG33975	41217	3676 // nucleic acid binding // inferred from electronic annotation /// 8270 // zinc ion binding // inferred from electronic annotation	---	5634 // nucleus // inferred from electronic annotation	---
2202	143401_at	1.52744	2.62291	7.45824	1.93e-08	1.63e-07	8.91061	FBgn0003961	CG7171	Uro	Urate oxidase	34060	4846 // urate oxidase activity // inferred from sequence or structural similarity /// 4846 // urate oxidase activity // non-traceable author statement /// 4846 // urate oxidase activity // inferred from sequence similarity	6144 // purine base metabolism // inferred from electronic annotation /// 19428 // allantoin biosynthesis // traceable author statement	5777 // peroxisome // non-traceable author statement	IPR002042 // Uricase // 4.2E-68 /// IPR002042 // Uricase // 4.0E-70
12235	153434_at	1.51559	3.6519	15.4062	3.33e-16	3.15e-14	26.9397	FBgn0001208	CG7399	Hn	Henna	38871	4505 // phenylalanine 4-monooxygenase activity // inferred from direct assay /// 4505 // phenylalanine 4-monooxygenase activity // inferred from mutant phenotype /// 4505 // phenylalanine 4-monooxygenase activity // inferred from sequence or structural similarity /// 4505 // phenylalanine 4-monooxygenase activity // non-traceable author statement /// 4510 // tryptophan 5-monooxygenase activity //…	6559 // L-phenylalanine catabolism // inferred from mutant phenotype /// 6559 // L-phenylalanine catabolism // non-traceable author statement /// 6726 // eye pigment biosynthesis // inferred from direct assay /// 7165 // signal transduction // inferred from electronic annotation /// 6559 // L-phenylalanine catabolism // inferred from electronic annotation /// 6587 // serotonin biosynthesis from t…	---	IPR001273 // Aromatic amino acid hydroxylase // 1.0E-126 /// IPR002912 // Amino acid-binding ACT // 1.4E-7 /// IPR001273 // Aromatic amino acid hydroxylase // 1.0E-126 /// IPR002912 // Amino acid-binding ACT // 1.4E-7 /// IPR001273 // Aromatic amino acid hydroxylase // 1.0E-126
573	141772_at	1.51021	2.15618	12.2945	1.5e-13	5.82e-12	20.789	FBgn0039209	CG13624	CG13624	CG13624	42930	3677 // DNA binding // inferred from electronic annotation /// 42803 // protein homodimerization activity // inferred from sequence or structural similarity /// 5515 // protein binding // inferred from physical interaction /// 42803 // protein homodimerization activity // inferred from sequence similarity	6355 // regulation of transcription, DNA-dependent // inferred from electronic annotation	5634 // nucleus // inferred from electronic annotation	---
11307	152506_at	1.49547	3.67427	8.78498	5.67e-10	7.75e-09	12.4675	FBgn0030999	CG7874	CG7874	CG7874	32912	8061 // chitin binding // inferred from electronic annotation	6030 // chitin metabolism // inferred from electronic annotation	5576 // extracellular region // inferred from electronic annotation	IPR002557 // Chitin binding Peritrophin-A // 1.4E-13
8488	149687_at	1.49092	3.06375	16.3825	5.93e-17	7.35e-15	28.6685	FBgn0037899	CG6764	CG6764	CG6764	41372	3676 // nucleic acid binding // inferred from electronic annotation /// 3735 // structural constituent of ribosome // inferred from sequence or structural similarity /// 5515 // protein binding // inferred from physical interaction /// 3735 // structural constituent of ribosome // inferred from electronic annotation /// 3735 // structural constituent of ribosome // inferred from sequence similari…	6412 // protein biosynthesis // inferred from sequence or structural similarity /// 42254 // ribosome biogenesis and assembly // inferred from sequence or structural similarity /// 6412 // protein biosynthesis // inferred from electronic annotation /// 7046 // ribosome biogenesis // inferred from electronic annotation /// 6412 // protein biosynthesis // inferred from sequence similarity /// 42254…	5842 // cytosolic large ribosomal subunit (sensu Eukaryota) // inferred from sequence or structural similarity /// 5622 // intracellular // inferred from electronic annotation /// 5634 // nucleus // inferred from electronic annotation /// 5840 // ribosome // inferred from electronic annotation /// 5842 // cytosolic large ribosomal subunit (sensu Eukaryota) // inferred from sequence similarity	IPR000988 // Ribosomal protein L24E // 3.6E-33
8842	150041_at	1.468	1.62642	15.6891	2e-16	2.08e-14	27.4497	FBgn0038467	CG3590	CG3590	CG3590	42051	4018 // adenylosuccinate lyase activity // inferred from sequence or structural similarity /// 3824 // catalytic activity // inferred from electronic annotation /// 4018 // adenylosuccinate lyase activity // inferred from electronic annotation /// 16829 // lyase activity // inferred from electronic annotation /// 4018 // adenylosuccinate lyase activity // inferred from sequence similarity	6144 // purine base metabolism // inferred from electronic annotation /// 9152 // purine ribonucleotide biosynthesis // inferred from electronic annotation	---	IPR000362 // Fumarate lyase // 6.3E-70
8425	149624_at	1.46225	0.360592	20.6427	7.55e-20	3.23e-17	35.305	FBgn0037801	CG3999	CG3999	CG3999	41253	4375 // glycine dehydrogenase (decarboxylating) activity // inferred from sequence or structural similarity /// 5515 // protein binding // inferred from physical interaction /// 4375 // glycine dehydrogenase (decarboxylating) activity // inferred from electronic annotation /// 16829 // lyase activity // inferred from electronic annotation /// 4375 // glycine dehydrogenase (decarboxylating) activi…	6544 // glycine metabolism // inferred from electronic annotation /// 9063 // amino acid catabolism // inferred from electronic annotation /// 6520 // amino acid metabolism // inferred from electronic annotation	5961 // glycine dehydrogenase complex (decarboxylating) // inferred from sequence or structural similarity /// 5961 // glycine dehydrogenase complex (decarboxylating) // inferred from electronic annotation /// 5961 // glycine dehydrogenase complex (decarboxylating) // inferred from sequence similarity	IPR003437 // Glycine cleavage system P-protein // 1.0E-126
11470	152669_at	1.45935	2.84327	11.7493	4.87e-13	1.6e-11	19.5992	FBgn0020385	CG4067	pug	pugilist	41279	4329 // formate-tetrahydrofolate ligase activity // inferred from sequence or structural similarity /// 4477 // methenyltetrahydrofolate cyclohydrolase activity // inferred from sequence or structural similarity /// 4488 // methylenetetrahydrofolate dehydrogenase (NADP+) activity // inferred from sequence or structural similarity /// 5524 // ATP binding // inferred from electronic annotation /// …	8652 // amino acid biosynthesis // inferred from electronic annotation /// 9396 // folic acid and derivative biosynthesis // inferred from electronic annotation /// 105 // histidine biosynthesis // inferred from electronic annotation /// 6164 // purine nucleotide biosynthesis // inferred from electronic annotation /// 6730 // one-carbon compound metabolism // inferred from electronic annotation /…	5737 // cytoplasm // inferred from direct assay	IPR000559 // Formate-tetrahydrofolate ligase, FTHFS // 1.0E-126 /// IPR000672 // Tetrahydrofolate dehydrogenase/cyclohydrolase // 1.0E-80 /// IPR000672 // Tetrahydrofolate dehydrogenase/cyclohydrolase // 4.0E-114 /// IPR000559 // Formate-tetrahydrofolate ligase, FTHFS // 1.0E-126 /// IPR000672 // Tetrahydrofolate dehydrogenase/cyclohydrolase // 1.0E-80 /// IPR000672 // Tetrahydrofolate dehydrogen…
533	141732_at	1.45475	3.22404	11.3009	1.32e-12	3.8e-11	18.593	FBgn0004210	CG7850	puc	puckered	40958	4721 // phosphoprotein phosphatase activity // inferred from direct assay /// 4725 // protein tyrosine phosphatase activity // inferred from sequence or structural similarity /// 8138 // protein tyrosine/serine/threonine phosphatase activity // inferred from sequence or structural similarity /// 8138 // protein tyrosine/serine/threonine phosphatase activity // non-traceable author statement /// 8…	165 // MAPKKK cascade // inferred from electronic annotation /// 1736 // establishment of planar polarity // non-traceable author statement /// 6470 // protein amino acid dephosphorylation // inferred from direct assay /// 6470 // protein amino acid dephosphorylation // inferred from sequence or structural similarity /// 6470 // protein amino acid dephosphorylation // non-traceable author stateme…	---	IPR000340 // Dual specificity protein phosphatase // 2.4E-45
10631	151830_at	1.44676	3.46679	13.1448	2.55e-14	1.26e-12	22.5745	FBgn0011296	CG4533	l(2)efl	lethal (2) essential for life	37744	42802 // identical protein binding // inferred from physical interaction	6457 // protein folding // inferred from electronic annotation /// 6950 // response to stress // inferred from electronic annotation /// 6952 // defense response // inferred from electronic annotation /// 9408 // response to heat // non-traceable author statement /// 9790 // embryonic development // non-traceable author statement /// 6986 // response to unfolded protein // inferred from electroni…	---	IPR002068 // Heat shock protein Hsp20 // 1.0E-18 /// IPR002068 // Heat shock protein Hsp20 // 1.2E-35 /// IPR002068 // Heat shock protein Hsp20 // 6.7E-19
2135	143334_at	1.44177	2.00087	13.936	5.27e-15	3.27e-13	24.1626	FBgn0003328	CG8095	scb	scab	36692	4872 // receptor activity // inferred from physical interaction /// 4872 // receptor activity // inferred from sequence or structural similarity /// 4872 // receptor activity // non-traceable author statement /// 4872 // receptor activity // traceable author statement /// 5055 // laminin receptor activity // non-traceable author statement /// 5198 // structural molecule activity // non-traceable …	7155 // cell adhesion // inferred from physical interaction /// 7155 // cell adhesion // inferred from sequence or structural similarity /// 7155 // cell adhesion // non-traceable author statement /// 7155 // cell adhesion // traceable author statement /// 7157 // heterophilic cell adhesion // traceable author statement /// 7160 // cell-matrix adhesion // traceable author statement /// 7391 // do…	5886 // plasma membrane // inferred from sequence or structural similarity /// 5925 // focal adhesion // inferred from sequence or structural similarity /// 8305 // integrin complex // inferred from sequence or structural similarity /// 8305 // integrin complex // non-traceable author statement /// 16021 // integral to membrane // non-traceable author statement /// 8305 // integrin complex // inf…	IPR000413 // Integrins alpha chain // 5.0E-8 /// IPR000413 // Integrins alpha chain // 8.7E-10 /// IPR000413 // Integrins alpha chain // 1.9E-5
10404	151603_at	1.43302	1.52524	14.5899	1.5e-15	1.12e-13	25.4247	FBgn0030960	CG7053	CG7053	CG7053	32871	5515 // protein binding // inferred from physical interaction /// 166 // nucleotide binding // inferred from electronic annotation /// 4672 // protein kinase activity // inferred from electronic annotation /// 4674 // protein serine/threonine kinase activity // inferred from electronic annotation /// 5524 // ATP binding // inferred from electronic annotation /// 16301 // kinase activity // inferr…	6468 // protein amino acid phosphorylation // inferred from electronic annotation	---	---
4545	145744_at	1.42494	1.43868	13.9795	4.84e-15	3.04e-13	24.248	FBgn0031580	CG15423	CG15423	CG15423	33616	---	---	---	---
9825	151024_at	1.41429	-0.431216	7.03537	6.2e-08	4.46e-07	7.73524	FBgn0053975	---	CG33975	CG33975	41217	3676 // nucleic acid binding // inferred from electronic annotation /// 8270 // zinc ion binding // inferred from electronic annotation	---	5634 // nucleus // inferred from electronic annotation	---
5996	147195_at	1.40804	0.570024	6.87953	9.57e-08	6.49e-07	7.29776	FBgn0033926	CG12505	CG12505	CG12505	36595	5515 // protein binding // inferred from physical interaction /// 3676 // nucleic acid binding // inferred from electronic annotation /// 8270 // zinc ion binding // inferred from electronic annotation	---	---	IPR005162 // Retrotransposon gag protein // 5.1E-18
11780	152979_at	1.39586	2.33138	17.3977	1.07e-17	1.79e-15	30.3772	FBgn0051531	CG31531	CG31531	CG31531	40583	---	---	---	---
180	141379_at	1.38947	4.30758	13.1968	2.3e-14	1.16e-12	22.681	FBgn0015010	CG9538	Ag5r	Antigen 5-related	44631	---	6952 // defense response // inferred from electronic annotation	5576 // extracellular region // inferred from sequence or structural similarity /// 5576 // extracellular region // inferred from electronic annotation /// 5576 // extracellular region // inferred from sequence similarity	IPR001283 // Allergen V5/Tpx-1 related // 2.1E-40 /// IPR001283 // Allergen V5/Tpx-1 related // 1.0E-41
4647	145846_at	1.38446	0.00154663	6.73897	1.42e-07	9.09e-07	6.90141	FBgn0031736	CG11030	CG11030	CG11030	33805	---	---	---	---
5860	147059_s_at	1.37508	0.887899	11.3654	1.14e-12	3.34e-11	18.7393	---	---	---	---	---	---	---	---	---
2040	143239_at	1.37457	2.02925	8.8069	5.36e-10	7.36e-09	12.5245	FBgn0002565	CG6806	Lsp2	Larval serum protein 2	45326	4182 // carboxypeptidase A activity // inferred from electronic annotation /// 5344 // oxygen transporter activity // inferred from electronic annotation /// 45735 // nutrient reservoir activity // non-traceable author statement /// 5515 // protein binding // inferred from physical interaction /// 45735 // nutrient reservoir activity // inferred from electronic annotation	6508 // proteolysis // inferred from electronic annotation /// 6810 // transport // inferred from electronic annotation	5576 // extracellular region // non-traceable author statement /// 5616 // larval serum protein complex // inferred from direct assay	IPR000896 // Arthropod hemocyanin/insect LSP // 4.0E-48 /// IPR005204 // Hemocyanin, N-terminal // 1.6E-16 /// IPR005203 // Hemocyanin, C-terminal // 1.1E-74
4847	146046_at	1.37111	0.806982	9.45858	1.03e-10	1.75e-09	14.1888	FBgn0003209	CG12437	raw	raw	44851	---	2009 // morphogenesis of an epithelium // inferred from mutant phenotype /// 7390 // germ-band shortening // inferred from mutant phenotype /// 7391 // dorsal closure // inferred from mutant phenotype /// 7391 // dorsal closure // non-traceable author statement /// 7391 // dorsal closure // traceable author statement /// 7394 // dorsal closure, elongation of leading edge cells // traceable author…	---	---
3799	144998_at	1.37102	0.294412	7.29036	3.06e-08	2.41e-07	8.44613	FBgn0030469	CG15745	CG15745	CG15745	32283	---	---	---	---
3859	145058_at	1.345	2.77257	10.5347	7.67e-12	1.82e-10	16.8151	FBgn0030558	CG1461	CG1461	CG1461	32381	4838 // tyrosine transaminase activity // inferred from sequence or structural similarity /// 16847 // 1-aminocyclopropane-1-carboxylate synthase activity // inferred from electronic annotation /// 46872 // metal ion binding // inferred from electronic annotation /// 5515 // protein binding // inferred from physical interaction /// 4838 // tyrosine transaminase activity // inferred from electroni…	9058 // biosynthesis // inferred from electronic annotation /// 9063 // amino acid catabolism // inferred from electronic annotation /// 9072 // aromatic amino acid family metabolism // inferred from electronic annotation /// 30001 // metal ion transport // inferred from electronic annotation /// 6519 // amino acid and derivative metabolism // inferred from electronic annotation	---	IPR004839 // Aminotransferase, class I and II // 1.2E-44
6021	147220_s_at	1.34132	1.79942	3.09643	0.00409826	0.00796347	-3.22868	FBgn0041581 /// FBgn0012042	CG10146 /// CG18372	AttB /// AttA	Attacin-B /// Attacin-A	36636 /// 36637	---	6961 // antibacterial humoral response (sensu Protostomia) // inferred from expression pattern /// 6961 // antibacterial humoral response (sensu Protostomia) // non-traceable author statement /// 42742 // defense response to bacteria // traceable author statement /// 50829 // defense response to Gram-negative bacteria // inferred from expression pattern /// 50829 // defense response to Gram-negat…	5576 // extracellular region // inferred from electronic annotation /// 5576 // extracellular region // traceable author statement	IPR005521 // Attacin, C-terminal region // 3.5E-70 /// IPR005520 // Attacin, N-terminal region // 7.5E-34 /// IPR005521 // Attacin, C-terminal region // 2.2E-69 /// IPR005520 // Attacin, N-terminal region // 1.7E-33 /// IPR005520 // Attacin, N-terminal region // 9.8E-24
13802	155001_at	1.3388	2.66916	16.3401	6.38e-17	7.77e-15	28.5953	FBgn0033677	CG8321	CG8321	CG8321	36287	---	---	---	---
4621	145820_at	1.32835	1.78256	3.26013	0.00267708	0.00546973	-2.82391	FBgn0031701	CG14027	TotM	Turandot M	33764	---	16065 // humoral defense mechanism (sensu Protostomia) // non-traceable author statement	---	IPR010825 // Stress-inducible humoral factor Turandot // 2.3E-80 /// IPR010825 // Stress-inducible humoral factor Turandot // 1.1E-9
8399	149598_at	1.32602	0.591523	7.99968	4.45e-09	4.67e-08	10.3876	FBgn0053975	---	CG33975	CG33975	41217	3676 // nucleic acid binding // inferred from electronic annotation /// 8270 // zinc ion binding // inferred from electronic annotation	---	5634 // nucleus // inferred from electronic annotation	---
1806	143005_at	1.3245	1.30038	7.93598	5.28e-09	5.39e-08	10.2156	FBgn0025628	CG4199	CG4199	CG4199	31174	15036 // disulfide oxidoreductase activity // inferred from electronic annotation /// 16491 // oxidoreductase activity // inferred from electronic annotation	6118 // electron transport // inferred from electronic annotation /// 6124 // ferredoxin metabolism // inferred from electronic annotation /// 6800 // oxygen and reactive oxygen species metabolism // inferred from electronic annotation /// 6952 // defense response // inferred from electronic annotation	---	IPR005806 // Rieske [2Fe-2S] domain // 3.3E-19 /// IPR001327 // FAD-dependent pyridine nucleotide-disulphide oxidoreductase // 1.8E-71 /// IPR005806 // Rieske [2Fe-2S] domain // 3.3E-19 /// IPR001327 // FAD-dependent pyridine nucleotide-disulphide oxidoreductase // 1.8E-71 /// IPR005806 // Rieske [2Fe-2S] domain // 3.3E-19 /// IPR001327 // FAD-dependent pyridine nucleotide-disulphide oxidoreducta…
10863	152062_at	1.32169	0.755945	9.23633	1.8e-10	2.85e-09	13.6275	FBgn0035540	CG7452	Syx17	Syntaxin 17	38541	5486 // t-SNARE activity // inferred from sequence or structural similarity /// 5486 // t-SNARE activity // inferred from sequence similarity	6886 // intracellular protein transport // inferred from electronic annotation /// 7269 // neurotransmitter secretion // inferred from sequence or structural similarity /// 16081 // synaptic vesicle docking during exocytosis // inferred from sequence or structural similarity /// 16192 // vesicle-mediated transport // inferred from sequence or structural similarity /// 7269 // neurotransmitter sec…	5886 // plasma membrane // inferred from sequence or structural similarity /// 5886 // plasma membrane // inferred from sequence similarity	IPR000727 // Target SNARE coiled-coil domain // 4.8E-7
10635	151834_at	1.31693	3.33199	7.52154	1.62e-08	1.41e-07	9.08497	FBgn0052130	CG32130	CG32130	CG32130	39518	4263 // chymotrypsin activity // inferred from electronic annotation /// 4295 // trypsin activity // inferred from electronic annotation /// 5515 // protein binding // inferred from electronic annotation /// 5515 // protein binding // inferred from physical interaction /// 4252 // serine-type endopeptidase activity // inferred from electronic annotation /// 8233 // peptidase activity // inferred …	6508 // proteolysis // inferred from electronic annotation /// 6915 // apoptosis // inferred from electronic annotation	---	IPR003103 // Apoptosis regulator Bcl-2 protein, BAG // 1.4E-17 /// IPR003103 // Apoptosis regulator Bcl-2 protein, BAG // 1.4E-17 /// IPR003103 // Apoptosis regulator Bcl-2 protein, BAG // 1.4E-17
4704	145903_at	1.30457	-0.657064	6.3218	4.63e-07	2.51e-06	5.71634	FBgn0051638	CG31638	CG31638	CG31638	33910	---	---	16459 // myosin // inferred from sequence or structural similarity /// 16459 // myosin // inferred from sequence similarity	---
12275	153474_at	1.28952	2.43963	16.8374	2.73e-17	3.82e-15	29.4449	FBgn0036257	CG6811	RhoGAP68F	RhoGAP68F	39385	5085 // guanyl-nucleotide exchange factor activity // inferred from electronic annotation /// 5100 // Rho GTPase activator activity // inferred from sequence or structural similarity /// 5102 // receptor binding // inferred from electronic annotation /// 5515 // protein binding // inferred from physical interaction /// 5100 // Rho GTPase activator activity // inferred from sequence similarity	6928 // cell motility // inferred from electronic annotation /// 7010 // cytoskeleton organization and biogenesis // inferred from electronic annotation /// 7242 // intracellular signaling cascade // inferred from electronic annotation	---	IPR000198 // RhoGAP domain // 8.0E-66
7587	148786_at	1.28185	1.81659	9.77563	4.72e-11	8.88e-10	14.9784	---	CG33957	---	---	---	---	7020 // microtubule nucleation // inferred from direct assay	---	---
10978	152177_at	1.28091	2.08828	11.411	1.03e-12	3.04e-11	18.8424	FBgn0027565	CG5498	CG5498	CG5498	40250	---	---	---	IPR005024 // Snf7 // 3.6E-19
4307	145506_r_at	1.2767	3.44241	7.06021	5.78e-08	4.2e-07	7.80476	---	---	---	---	---	---	---	---	---
6011	147210_at	1.2759	3.01457	12.7157	6.17e-14	2.74e-12	21.6841	FBgn0033945	CG12868	CG12868	CG12868	36620	---	---	---	---
10119	151318_r_at	1.25974	3.49011	6.42399	3.46e-07	1.96e-06	6.0077	FBgn0067895	CG17469	Mitf	Mitf	3885647	30528 // transcription regulator activity // inferred from direct assay /// 30528 // transcription regulator activity // inferred from electronic annotation	1745 // compound eye morphogenesis (sensu Endopterygota) // inferred from mutant phenotype /// 45449 // regulation of transcription // inferred from direct assay /// 7275 // development // inferred from electronic annotation /// 30154 // cell differentiation // inferred from electronic annotation /// 45449 // regulation of transcription // inferred from electronic annotation	5634 // nucleus // inferred from electronic annotation	---
2535	143734_at	1.25607	0.225986	11.2044	1.64e-12	4.63e-11	18.3732	FBgn0013984	CG18402	InR	Insulin-like receptor	42549	4713 // protein-tyrosine kinase activity // non-traceable author statement /// 4896 // hematopoietin/interferon-class (D200-domain) cytokine receptor activity // inferred from electronic annotation /// 5006 // epidermal growth factor receptor activity // inferred from electronic annotation /// 5009 // insulin receptor activity // inferred from direct assay /// 5009 // insulin receptor activity //…	1700 // embryonic development (sensu Insecta) // inferred from expression pattern /// 1700 // embryonic development (sensu Insecta) // traceable author statement /// 6468 // protein amino acid phosphorylation // non-traceable author statement /// 7296 // vitellogenesis // traceable author statement /// 7390 // germ-band shortening // inferred from genetic interaction /// 7390 // germ-band shorten…	5886 // plasma membrane // inferred from sequence or structural similarity /// 5887 // integral to plasma membrane // non-traceable author statement /// 5899 // insulin receptor complex // inferred from direct assay /// 5911 // intercellular junction // inferred from direct assay /// 5887 // integral to plasma membrane // inferred from sequence or structural similarity /// 16020 // membrane // in…	IPR006211 // Furin-like cysteine rich region // 6.2E-9 /// IPR003961 // Fibronectin, type III // 2.2E-5 /// IPR000719 // Protein kinase // 4.1E-68 /// IPR000494 // Epidermal growth-factor receptor (EGFR), L domain // 6.3E-43 /// IPR000494 // Epidermal growth-factor receptor (EGFR), L domain // 6.0E-38
12651	153850_at	1.25204	3.64567	12.6012	7.84e-14	3.36e-12	21.4427	FBgn0038100	CG12358	Paip2	polyA-binding protein interacting protein 2	41591	5515 // protein binding // inferred from physical interaction	1558 // regulation of cell growth // inferred from mutant phenotype /// 16478 // negative regulation of translation // inferred from direct assay /// 16478 // negative regulation of translation // inferred from sequence or structural similarity /// 16478 // negative regulation of translation // inferred from sequence similarity	---	---
10133	151332_r_at	1.25172	3.85493	6.39454	3.76e-07	2.1e-06	5.92382	---	---	---	---	---	---	---	---	---
5572	146771_at	1.24964	2.15418	7.0668	5.68e-08	4.15e-07	7.82319	FBgn0033226	CG1882	CG1882	CG1882	35733	3824 // catalytic activity // inferred from electronic annotation /// 16787 // hydrolase activity // inferred from electronic annotation	6725 // aromatic compound metabolism // inferred from electronic annotation	---	IPR000073 // Alpha/beta hydrolase fold // 1.1E-22 /// IPR000073 // Alpha/beta hydrolase fold // 1.1E-22
11821	153020_at	1.23839	1.04876	12.5667	8.43e-14	3.56e-12	21.3698	FBgn0044452	CG1241	Atg2	Autophagy-specific gene 2	38344	---	6914 // autophagy // inferred from mutant phenotype	---	---
11535	152734_at	1.23765	3.02101	14.651	1.34e-15	1.04e-13	25.5404	FBgn0028940	CG8864	Cyp28a5	Cyp28a5	34817	4497 // monooxygenase activity // inferred from electronic annotation /// 16491 // oxidoreductase activity // inferred from electronic annotation /// 5506 // iron ion binding // inferred from electronic annotation /// 20037 // heme binding // inferred from electronic annotation /// 46872 // metal ion binding // inferred from electronic annotation	6118 // electron transport // inferred from electronic annotation /// 8202 // steroid metabolism // inferred from electronic annotation	5792 // microsome // non-traceable author statement /// 16020 // membrane // non-traceable author statement /// 5783 // endoplasmic reticulum // inferred from electronic annotation /// 5792 // microsome // inferred from electronic annotation /// 16020 // membrane // inferred from electronic annotation	IPR001128 // Cytochrome P450 // 1.9E-68
9823	151022_at	1.23604	2.04342	9.56204	7.98e-11	1.39e-09	14.4479	FBgn0053936	CG33936	CG33936	CG33936	41114	3677 // DNA binding // inferred from electronic annotation /// 8270 // zinc ion binding // inferred from electronic annotation	---	---	---
5748	146947_at	1.23597	0.462352	9.70343	5.64e-11	1.03e-09	14.7998	FBgn0033519	CG11825	CG11825	CG11825	36099	---	---	---	IPR007667 // Hypoxia induced protein conserved region // 2.3E-35
10719	151918_s_at	1.23566	3.68098	14.2282	2.99e-15	2.01e-13	24.7322	FBgn0027594	CG2086	drpr	draper	38218	4872 // receptor activity // inferred from electronic annotation /// 5201 // extracellular matrix structural constituent // inferred from electronic annotation /// 5198 // structural molecule activity // inferred from electronic annotation	6909 // phagocytosis // inferred from mutant phenotype /// 6909 // phagocytosis // traceable author statement /// 7155 // cell adhesion // inferred from sequence or structural similarity /// 7165 // signal transduction // inferred from electronic annotation /// 7398 // ectoderm development // inferred from electronic annotation /// 7399 // nervous system development // inferred from electronic an…	31224 // intrinsic to membrane // non-traceable author statement	IPR006209 // EGF-like domain // 1.1E-4 /// IPR006209 // EGF-like domain // 7.8E-6 /// IPR006209 // EGF-like domain // 2.0E-4 /// IPR006209 // EGF-like domain // 1.9E-5 /// IPR006209 // EGF-like domain // 7.2E-6 /// IPR006209 // EGF-like domain // 2.1E-4 /// IPR006209 // EGF-like domain // 1.4E-5 /// IPR006209 // EGF-like domain // 2.2E-4 /// IPR006209 // EGF-like domain // 9.2E-5 /// IPR006209 //…
1478	142677_s_at	1.23312	3.60921	8.50525	1.17e-09	1.48e-08	11.7355	FBgn0020386	CG1210	Pk61C	Protein kinase 61C	38017	4672 // protein kinase activity // non-traceable author statement /// 4674 // protein serine/threonine kinase activity // inferred from sequence or structural similarity /// 4674 // protein serine/threonine kinase activity // non-traceable author statement /// 4702 // receptor signaling protein serine/threonine kinase activity // inferred from electronic annotation /// 5249 // voltage-gated potas…	1558 // regulation of cell growth // inferred from mutant phenotype /// 5977 // glycogen metabolism // inferred from electronic annotation /// 6468 // protein amino acid phosphorylation // inferred from direct assay /// 6468 // protein amino acid phosphorylation // inferred from sequence or structural similarity /// 6468 // protein amino acid phosphorylation // non-traceable author statement /// …	5737 // cytoplasm // inferred from sequence or structural similarity /// 5886 // plasma membrane // inferred from sequence or structural similarity /// 8076 // voltage-gated potassium channel complex // inferred from electronic annotation /// 5737 // cytoplasm // inferred from sequence similarity /// 5886 // plasma membrane // inferred from sequence similarity	IPR000719 // Protein kinase // 3.8E-39 /// IPR000719 // Protein kinase // 5.4E-29 /// IPR000719 // Protein kinase // 3.8E-39 /// IPR000719 // Protein kinase // 5.4E-29 /// IPR000719 // Protein kinase // 3.8E-39 /// IPR000719 // Protein kinase // 5.4E-29 /// IPR000719 // Protein kinase // 1.9E-24 /// IPR000719 // Protein kinase // 5.4E-29
2271	143470_at	1.23083	1.04224	13.1368	2.59e-14	1.27e-12	22.5581	FBgn0004431	CG9120	LysX	Lysozyme X	38122	3796 // lysozyme activity // inferred from sequence or structural similarity /// 3796 // lysozyme activity // non-traceable author statement /// 3796 // lysozyme activity // inferred from electronic annotation /// 3824 // catalytic activity // inferred from electronic annotation /// 16787 // hydrolase activity // inferred from electronic annotation /// 16798 // hydrolase activity, acting on glyco…	6952 // defense response // inferred from sequence or structural similarity /// 6960 // antimicrobial humoral response (sensu Protostomia) // non-traceable author statement /// 16998 // cell wall catabolism // inferred from electronic annotation /// 5975 // carbohydrate metabolism // inferred from electronic annotation /// 19835 // cytolysis // inferred from electronic annotation /// 42742 // def…	5576 // extracellular region // inferred from electronic annotation	IPR001916 // Glycoside hydrolase, family 22 // 2.4E-55
11831	153030_at	1.22945	2.29827	7.45747	1.93e-08	1.64e-07	8.90849	FBgn0036663	CG9674	CG9674	CG9674	39878	4355 // glutamate synthase (NADPH) activity // inferred from sequence or structural similarity /// 4497 // monooxygenase activity // inferred from electronic annotation /// 15036 // disulfide oxidoreductase activity // inferred from electronic annotation /// 5515 // protein binding // inferred from physical interaction /// 16491 // oxidoreductase activity // inferred from electronic annotation //…	5975 // carbohydrate metabolism // inferred from electronic annotation /// 6118 // electron transport // inferred from electronic annotation /// 6537 // glutamate biosynthesis // inferred from electronic annotation /// 6807 // nitrogen compound metabolism // inferred from electronic annotation /// 8652 // amino acid biosynthesis // inferred from electronic annotation /// 8152 // metabolism // inf…	---	IPR002489 // Protein of unknown function DUF14 // 8.0E-89 /// IPR001327 // FAD-dependent pyridine nucleotide-disulphide oxidoreductase // 1.1E-24 /// IPR002932 // Ferredoxin-dependent glutamate synthase // 1.3E-35 /// IPR006981 // Glutamate synthase amidotransferase domain // 1.0E-126 /// IPR002489 // Protein of unknown function DUF14 // 8.0E-89 /// IPR001327 // FAD-dependent pyridine nucleotide-…
13121	154320_at	1.22539	1.36085	10.2231	1.6e-11	3.49e-10	16.0703	FBgn0001291	CG2275	Jra	Jun-related antigen	36057	3677 // DNA binding // inferred from electronic annotation /// 3700 // transcription factor activity // inferred from electronic annotation /// 3702 // RNA polymerase II transcription factor activity // inferred from sequence or structural similarity /// 3704 // specific RNA polymerase II transcription factor activity // non-traceable author statement /// 5515 // protein binding // inferred from …	165 // MAPKKK cascade // traceable author statement /// 1736 // establishment of planar polarity // non-traceable author statement /// 6357 // regulation of transcription from RNA polymerase II promoter // non-traceable author statement /// 7254 // JNK cascade // inferred from genetic interaction /// 7254 // JNK cascade // inferred from mutant phenotype /// 7254 // JNK cascade // traceable author…	5634 // nucleus // inferred from direct assay /// 5634 // nucleus // inferred from sequence or structural similarity /// 5634 // nucleus // non-traceable author statement /// 5737 // cytoplasm // inferred from direct assay /// 5634 // nucleus // inferred from electronic annotation /// 5634 // nucleus // inferred from sequence similarity	IPR004827 // Basic-leucine zipper (bZIP) transcription factor // 8.7E-26 /// IPR005643 // Jun-like transcription factor // 9.6E-107
11811	153010_at	1.22523	2.37641	17.6245	7.41e-18	1.28e-15	30.7471	FBgn0036805 /// FBgn0068178	CG4108	Chmp1 /// DyakChmp1	Chmp1 /// Chmp1	40036	---	---	---	IPR005024 // Snf7 // 8.0E-62
11213	152412_at	1.21736	3.13125	11.7863	4.49e-13	1.48e-11	19.681	FBgn0035346	CG1146	CG1146	CG1146	38313	---	---	---	---
13422	154621_at	1.21724	3.86979	11.7053	5.37e-13	1.74e-11	19.5015	FBgn0027493	CG17273	CG17273	CG17273	42466	4019 // adenylosuccinate synthase activity // inferred from sequence or structural similarity /// 4019 // adenylosuccinate synthase activity // non-traceable author statement /// 5525 // GTP binding // inferred from electronic annotation /// 5515 // protein binding // inferred from physical interaction /// 166 // nucleotide binding // inferred from electronic annotation /// 287 // magnesium ion b…	6164 // purine nucleotide biosynthesis // non-traceable author statement /// 6164 // purine nucleotide biosynthesis // inferred from electronic annotation	---	IPR001114 // Adenylosuccinate synthetase // 1.0E-126
8556	149755_at	1.21445	3.31261	11.3986	1.06e-12	3.11e-11	18.8144	FBgn0038020	CG10091	GstD9	Glutathione S transferase D9	41502	4364 // glutathione transferase activity // inferred from direct assay /// 4364 // glutathione transferase activity // inferred from sequence or structural similarity /// 4364 // glutathione transferase activity // inferred from sequence similarity	6952 // defense response // inferred from electronic annotation /// 9636 // response to toxin // inferred from electronic annotation	---	IPR004046 // Glutathione S-transferase, C-terminal // 1.9E-13 /// IPR004045 // Glutathione S-transferase, N-terminal // 6.5E-22
11847	153046_at	1.20373	2.13045	12.1583	2.01e-13	7.47e-12	20.4951	FBgn0014031	CG3926	Spat	Serine pyruvate aminotransferase	31587	4760 // serine-pyruvate transaminase activity // inferred from sequence or structural similarity /// 4760 // serine-pyruvate transaminase activity // non-traceable author statement /// 8453 // alanine-glyoxylate transaminase activity // inferred from direct assay /// 8453 // alanine-glyoxylate transaminase activity // inferred from sequence or structural similarity /// 8483 // transaminase activi…	5975 // carbohydrate metabolism // inferred from electronic annotation /// 6952 // defense response // inferred from electronic annotation /// 9636 // response to toxin // inferred from electronic annotation /// 8152 // metabolism // inferred from electronic annotation	5759 // mitochondrial matrix // inferred from sequence or structural similarity /// 5777 // peroxisome // inferred from sequence or structural similarity /// 5759 // mitochondrial matrix // inferred from sequence similarity /// 5777 // peroxisome // inferred from sequence similarity	IPR000192 // Aminotransferase, class V // 3.0E-28
4815	146014_at	1.20314	0.882697	7.64654	1.15e-08	1.06e-07	9.42802	FBgn0032002	CG8353	CG8353	CG8353	34123	4126 // cytidine deaminase activity // inferred from sequence or structural similarity /// 8270 // zinc ion binding // inferred from electronic annotation /// 4126 // cytidine deaminase activity // inferred from electronic annotation /// 16787 // hydrolase activity // inferred from electronic annotation /// 4126 // cytidine deaminase activity // inferred from sequence similarity	6206 // pyrimidine base metabolism // inferred from electronic annotation /// 46087 // cytidine metabolism // inferred from electronic annotation	---	IPR002125 // Cytidine/deoxycytidylate deaminase, zinc-binding region // 1.4E-22
1595	142794_at	1.20311	3.19641	11.3405	1.21e-12	3.49e-11	18.6829	FBgn0017581	CG17342	Lk6	Lk6	44672	4672 // protein kinase activity // inferred from direct assay /// 4674 // protein serine/threonine kinase activity // inferred from sequence or structural similarity /// 4674 // protein serine/threonine kinase activity // non-traceable author statement /// 4702 // receptor signaling protein serine/threonine kinase activity // inferred from electronic annotation /// 5524 // ATP binding // inferred…	6468 // protein amino acid phosphorylation // non-traceable author statement /// 7017 // microtubule-based process // inferred from mutant phenotype /// 7242 // intracellular signaling cascade // inferred from electronic annotation /// 40008 // regulation of growth // inferred from mutant phenotype /// 6468 // protein amino acid phosphorylation // inferred from electronic annotation	5635 // nuclear envelope // inferred from direct assay /// 5737 // cytoplasm // inferred from direct assay /// 5813 // centrosome // inferred from direct assay /// 5874 // microtubule // inferred from direct assay	IPR000719 // Protein kinase // 8.1E-76 /// IPR000719 // Protein kinase // 8.1E-76
2636	143835_at	1.19944	2.62832	6.75702	1.35e-07	8.7e-07	6.9524	FBgn0015657	CG10578	DnaJ-1	DnaJ-like-1	38643	51082 // unfolded protein binding // inferred from electronic annotation /// 5515 // protein binding // inferred from physical interaction /// 31072 // heat shock protein binding // inferred from electronic annotation	6457 // protein folding // inferred from electronic annotation /// 6950 // response to stress // inferred from electronic annotation /// 6952 // defense response // inferred from electronic annotation /// 9408 // response to heat // inferred from sequence or structural similarity /// 6986 // response to unfolded protein // inferred from electronic annotation /// 9408 // response to heat // inferr…	5737 // cytoplasm // non-traceable author statement	IPR002939 // Chaperone DnaJ, C-terminal // 2.2E-9 /// IPR001623 // Heat shock protein DnaJ, N-terminal // 9.7E-39 /// IPR002939 // Chaperone DnaJ, C-terminal // 1.7E-6
3573	144772_at	1.19762	-0.173019	5.13879	1.39e-05	4.97e-05	2.32	FBgn0030161	CG15249	CG15249	CG15249	31924	---	---	---	---
2371	143570_at	1.19644	-0.351748	13.053	3.08e-14	1.48e-12	22.3857	FBgn0005660	CG2914	Ets21C	Ets at 21C	33229	3677 // DNA binding // non-traceable author statement /// 3700 // transcription factor activity // inferred from sequence or structural similarity /// 3700 // transcription factor activity // inferred from sequence similarity	6357 // regulation of transcription from RNA polymerase II promoter // inferred from electronic annotation	5634 // nucleus // inferred from sequence or structural similarity /// 5634 // nucleus // non-traceable author statement /// 5634 // nucleus // inferred from sequence similarity	IPR003118 // Sterile alpha motif (SAM)/Pointed domain // 1.6E-6 /// IPR000418 // Ets-domain // 4.0E-60
11161	152360_at	1.19115	2.03072	11.9013	3.5e-13	1.2e-11	19.9344	FBgn0024248	CG5686	chico	chico	64880	5158 // insulin receptor binding // inferred from electronic annotation /// 5159 // insulin-like growth factor receptor binding // inferred from genetic interaction /// 5159 // insulin-like growth factor receptor binding // inferred from sequence or structural similarity /// 5159 // insulin-like growth factor receptor binding // non-traceable author statement /// 5158 // insulin receptor binding …	902 // cellular morphogenesis // inferred from mutant phenotype /// 1678 // cell glucose homeostasis // inferred from electronic annotation /// 7295 // egg chamber growth (sensu Insecta) // inferred from mutant phenotype /// 7296 // vitellogenesis // inferred from mutant phenotype /// 7568 // aging // inferred from mutant phenotype /// 8152 // metabolism // traceable author statement /// 8286 // …	5634 // nucleus // inferred from sequence or structural similarity /// 5737 // cytoplasm // inferred from sequence or structural similarity /// 5792 // microsome // inferred from sequence or structural similarity	IPR002404 // Insulin receptor substrate-1, PTB // 2.0E-18 /// IPR001849 // Pleckstrin-like // 3.5E-13
104	141303_at	1.18749	-0.0101549	10.5213	7.92e-12	1.88e-10	16.7832	FBgn0033830	CG10814	CG10814	CG10814	36481	8336 // gamma-butyrobetaine dioxygenase activity // inferred from sequence or structural similarity /// 5515 // protein binding // inferred from physical interaction /// 16491 // oxidoreductase activity // inferred from electronic annotation /// 8336 // gamma-butyrobetaine dioxygenase activity // inferred from sequence similarity	6732 // coenzyme metabolism // inferred from electronic annotation /// 9110 // vitamin biosynthesis // inferred from electronic annotation /// 51189 // prosthetic group metabolism // inferred from electronic annotation /// 6118 // electron transport // inferred from electronic annotation	---	IPR004994 // Gamma-butyrobetaine hydroxylase // 1.0E-126
12542	153741_at	1.18729	2.74288	13.5676	1.09e-14	6.26e-13	23.4317	FBgn0028509	CG31811	cenG1A	centaurin gamma 1A	34803	5525 // GTP binding // inferred from electronic annotation /// 8060 // ARF GTPase activator activity // inferred from sequence or structural similarity /// 8060 // ARF GTPase activator activity // non-traceable author statement /// 5515 // protein binding // inferred from physical interaction /// 166 // nucleotide binding // inferred from electronic annotation /// 5096 // GTPase activator activit…	7186 // G-protein coupled receptor protein signaling pathway // inferred from electronic annotation /// 7264 // small GTPase mediated signal transduction // non-traceable author statement /// 43087 // regulation of GTPase activity // inferred from electronic annotation /// 7264 // small GTPase mediated signal transduction // inferred from electronic annotation	5634 // nucleus // non-traceable author statement	IPR001164 // Human Rev interacting-like protein (hRIP) // 2.8E-52 /// IPR002110 // Ankyrin // 7.5E-6 /// IPR001806 // Ras GTPase superfamily // 4.2E-9 /// IPR001849 // Pleckstrin-like // 2.7E-16 /// IPR001164 // Human Rev interacting-like protein (hRIP) // 2.8E-52 /// IPR002110 // Ankyrin // 7.5E-6 /// IPR001806 // Ras GTPase superfamily // 4.2E-9 /// IPR001849 // Pleckstrin-like // 2.7E-16 /// I…
11691	152890_at	1.18716	3.78132	13.3787	1.59e-14	8.67e-13	23.0512	FBgn0038088	CG10126	CG10126	CG10126	41579	5509 // calcium ion binding // inferred from sequence or structural similarity /// 5515 // protein binding // inferred from physical interaction /// 5509 // calcium ion binding // inferred from electronic annotation /// 5509 // calcium ion binding // inferred from sequence similarity	---	---	IPR002048 // Calcium-binding EF-hand // 0.0019 /// IPR002048 // Calcium-binding EF-hand // 3.1E-5 /// IPR002048 // Calcium-binding EF-hand // 2.6E-5 /// IPR002048 // Calcium-binding EF-hand // 0.17 /// IPR002048 // Calcium-binding EF-hand // 0.0019 /// IPR002048 // Calcium-binding EF-hand // 3.1E-5 /// IPR002048 // Calcium-binding EF-hand // 2.6E-5 /// IPR002048 // Calcium-binding EF-hand // 0.17
8837	150036_at	1.18422	1.9021	11.5848	7e-13	2.18e-11	19.233	FBgn0038455	CG14907	CG14907	CG14907	42031	8168 // methyltransferase activity // inferred from electronic annotation	6139 // nucleobase, nucleoside, nucleotide and nucleic acid metabolism // inferred from electronic annotation	5634 // nucleus // inferred from electronic annotation	---
11432	152631_at	1.17676	3.22619	5.6082	3.58e-06	1.5e-05	3.66913	FBgn0003691	CG12284	th	thread	39753	4842 // ubiquitin-protein ligase activity // traceable author statement /// 8270 // zinc ion binding // inferred from electronic annotation /// 5515 // protein binding // inferred from physical interaction /// 5515 // protein binding // inferred from electronic annotation /// 46872 // metal ion binding // inferred from electronic annotation	6513 // protein monoubiquitination // traceable author statement /// 6915 // apoptosis // inferred from physical interaction /// 6915 // apoptosis // non-traceable author statement /// 6915 // apoptosis // traceable author statement /// 6916 // anti-apoptosis // inferred from direct assay /// 6916 // anti-apoptosis // inferred from genetic interaction /// 6916 // anti-apoptosis // non-traceable a…	151 // ubiquitin ligase complex // inferred from electronic annotation /// 5622 // intracellular // inferred from electronic annotation	IPR001370 // Baculovirus inhibitor of apoptosis protein repeat (BIR) // 2.2E-35 /// IPR001370 // Baculovirus inhibitor of apoptosis protein repeat (BIR) // 6.4E-38 /// IPR001841 // Zn-finger, RING // 1.1E-7
802	142001_r_at	1.17502	7.58392	4.76732	4.05e-05	0.000128882	1.2591	FBgn0050485	CG30485	CG30485	CG30485	246644	---	---	---	---
2587	143786_at	1.1737	2.01803	12.3612	1.3e-13	5.14e-12	20.9321	FBgn0015234	CG8522	HLH106	Helix loop helix protein 106	40155	3700 // transcription factor activity // inferred from sequence or structural similarity /// 3700 // transcription factor activity // non-traceable author statement /// 30528 // transcription regulator activity // inferred from electronic annotation /// 3700 // transcription factor activity // inferred from sequence similarity	6366 // transcription from RNA polymerase II promoter // inferred from electronic annotation /// 6629 // lipid metabolism // inferred from electronic annotation /// 6633 // fatty acid biosynthesis // non-traceable author statement /// 42304 // regulation of fatty acid biosynthesis // traceable author statement /// 45941 // positive regulation of transcription // traceable author statement /// 727…	5634 // nucleus // inferred from sequence or structural similarity /// 5634 // nucleus // non-traceable author statement /// 5634 // nucleus // traceable author statement /// 5634 // nucleus // inferred from electronic annotation /// 5634 // nucleus // inferred from sequence similarity	IPR001092 // Basic helix-loop-helix dimerization domain bHLH // 1.9E-14
10561	151760_at	1.16391	2.52839	9.81722	4.27e-11	8.11e-10	15.081	FBgn0033913	CG8468	CG8468	CG8468	36577	15355 // monocarboxylate porter activity // non-traceable author statement	6812 // cation transport // inferred from electronic annotation	---	---
7924	149123_at	1.16347	1.07338	10.4085	1.03e-11	2.37e-10	16.5148	FBgn0028978	CG5408	trbl	tribbles	43999	4674 // protein serine/threonine kinase activity // inferred from sequence or structural similarity /// 4674 // protein serine/threonine kinase activity // traceable author statement /// 4702 // receptor signaling protein serine/threonine kinase activity // inferred from electronic annotation /// 5524 // ATP binding // inferred from electronic annotation /// 5515 // protein binding // inferred fr…	74 // regulation of progression through cell cycle // inferred from mutant phenotype /// 6468 // protein amino acid phosphorylation // inferred from electronic annotation /// 7165 // signal transduction // inferred from electronic annotation /// 7369 // gastrulation // non-traceable author statement /// 7370 // ventral furrow formation // inferred from genetic interaction /// 45839 // negative re…	---	IPR000719 // Protein kinase // 5.6E-5 /// IPR000719 // Protein kinase // 1.1E-16
13286	154485_at	1.16034	2.58016	18.2824	2.59e-18	5.57e-16	31.7973	FBgn0001301	CG7210	kel	kelch	35084	3779 // actin binding // inferred from direct assay /// 3779 // actin binding // inferred from sequence or structural similarity /// 3779 // actin binding // non-traceable author statement /// 5515 // protein binding // inferred from physical interaction /// 3779 // actin binding // inferred from electronic annotation /// 5515 // protein binding // inferred from electronic annotation /// 8430 // …	6915 // apoptosis // inferred from electronic annotation /// 7297 // follicle cell migration (sensu Insecta) // inferred from mutant phenotype /// 7301 // ovarian ring canal formation // inferred from direct assay /// 7301 // ovarian ring canal formation // inferred from mutant phenotype /// 7301 // ovarian ring canal formation // non-traceable author statement /// 7303 // cytoplasmic transport, …	5938 // cell cortex // non-traceable author statement /// 35183 // ring canal inner rim // traceable author statement /// 45172 // ring canal (sensu Insecta) // inferred from direct assay /// 45172 // ring canal (sensu Insecta) // non-traceable author statement /// 45172 // ring canal (sensu Insecta) // traceable author statement /// 5856 // cytoskeleton // inferred from electronic annotation	IPR006652 // Kelch repeat // 1.7E-6 /// IPR006652 // Kelch repeat // 1.6E-15 /// IPR006652 // Kelch repeat // 1.1E-18 /// IPR006652 // Kelch repeat // 2.2E-18 /// IPR006652 // Kelch repeat // 1.0E-17 /// IPR006652 // Kelch repeat // 1.0E-15 /// IPR000210 // BTB/POZ domain // 2.7E-45
4482	145681_at	1.1602	1.55619	4.30064	0.000153704	0.000422235	-0.0543659	FBgn0051694	CG31694	CG31694	CG31694	33489	5102 // receptor binding // inferred from electronic annotation /// 16787 // hydrolase activity // inferred from electronic annotation /// 16799 // hydrolase activity, hydrolyzing N-glycosyl compounds // inferred from electronic annotation	7275 // development // inferred from electronic annotation /// 7398 // ectoderm development // inferred from electronic annotation /// 7399 // nervous system development // inferred from electronic annotation	---	IPR006921 // Interferon-related protein conserved region // 1.4E-16 /// IPR007701 // Interferon-related developmental regulator // 1.0E-126
7007	148206_at	1.15543	1.62137	10.6073	6.47e-12	1.56e-10	16.9868	FBgn0035583	CG13704	CG13704	CG13704	38588	---	---	---	---
6369	147568_at	1.15504	1.34434	7.14643	4.55e-08	3.41e-07	8.04565	FBgn0034542 /// FBgn0081473	CG9025	CG9025 /// DpseGA21487	CG9025 /// GA21487	37344	5057 // receptor signaling protein activity // inferred from electronic annotation /// 5102 // receptor binding // inferred from electronic annotation	---	---	IPR002110 // Ankyrin // 0.0088 /// IPR002110 // Ankyrin // 1.4E-8 /// IPR002110 // Ankyrin // 5.9E-7 /// IPR002110 // Ankyrin // 0.0034 /// IPR002110 // Ankyrin // 1.2E-7 /// IPR002110 // Ankyrin // 6.3 /// IPR002110 // Ankyrin // 0.0081 /// IPR002110 // Ankyrin // 8.4E-4 /// IPR002110 // Ankyrin // 0.0088 /// IPR002110 // Ankyrin // 1.4E-8 /// IPR002110 // Ankyrin // 5.9E-7 /// IPR002110 // Anky…
10857	152056_at	1.15125	4.60611	10.4668	9e-12	2.09e-10	16.6538	FBgn0003231	CG10360	ref(2)P	refractory to sigma P	35246	4197 // cysteine-type endopeptidase activity // inferred from electronic annotation /// 8270 // zinc ion binding // inferred from electronic annotation /// 30528 // transcription regulator activity // inferred from electronic annotation /// 5515 // protein binding // inferred from physical interaction /// 3677 // DNA binding // inferred from electronic annotation /// 46872 // metal ion binding //…	6508 // proteolysis // inferred from electronic annotation /// 19058 // viral infectious cycle // non-traceable author statement	5634 // nucleus // non-traceable author statement /// 5634 // nucleus // inferred from electronic annotation	IPR000433 // Zn-finger, ZZ type // 8.7E-25 /// IPR000270 // Octicosapeptide/Phox/Bem1p // 4.3E-8
175	141374_at	1.15083	1.36497	2.88623	0.00698939	0.0127836	-3.73185	FBgn0012042	CG10146	AttA	Attacin-A	36636	---	6961 // antibacterial humoral response (sensu Protostomia) // inferred from expression pattern /// 6961 // antibacterial humoral response (sensu Protostomia) // non-traceable author statement /// 42742 // defense response to bacteria // traceable author statement /// 50829 // defense response to Gram-negative bacteria // inferred from expression pattern /// 50829 // defense response to Gram-negat…	5576 // extracellular region // inferred from electronic annotation	IPR005521 // Attacin, C-terminal region // 3.5E-70 /// IPR005520 // Attacin, N-terminal region // 7.5E-34 /// IPR005520 // Attacin, N-terminal region // 9.8E-24
12618	153817_at	1.14864	3.81957	16.5407	4.52e-17	5.81e-15	28.9406	FBgn0003514	CG3595	sqh	spaghetti squash	31554	5509 // calcium ion binding // non-traceable author statement /// 5516 // calmodulin binding // inferred from electronic annotation /// 42623 // ATPase activity, coupled // inferred from sequence or structural similarity /// 5509 // calcium ion binding // inferred from electronic annotation /// 42623 // ATPase activity, coupled // inferred from sequence similarity	910 // cytokinesis // inferred from mutant phenotype /// 910 // cytokinesis // non-traceable author statement /// 910 // cytokinesis // traceable author statement /// 1736 // establishment of planar polarity // non-traceable author statement /// 6936 // muscle contraction // inferred from electronic annotation /// 7298 // border follicle cell migration (sensu Insecta) // inferred from mutant phen…	16461 // unconventional myosin // inferred from sequence or structural similarity /// 16461 // unconventional myosin // non-traceable author statement /// 16461 // unconventional myosin // inferred from sequence similarity	IPR002048 // Calcium-binding EF-hand // 1.1E-7
10359	151558_r_at	1.14795	4.14462	6.50927	2.72e-07	1.59e-06	6.25036	---	CG33691 /// CG33692	---	---	---	5515 // protein binding // inferred from physical interaction	---	---	---
10710	151909_at	1.1465	3.14807	11.8202	4.17e-13	1.4e-11	19.7558	FBgn0032350	CG6287	CG6287	CG6287	34554	4617 // phosphoglycerate dehydrogenase activity // inferred from sequence or structural similarity /// 16616 // oxidoreductase activity, acting on the CH-OH group of donors, NAD or NADP as acceptor // inferred from electronic annotation /// 51287 // NAD binding // inferred from electronic annotation /// 4617 // phosphoglycerate dehydrogenase activity // inferred from sequence similarity	5975 // carbohydrate metabolism // inferred from electronic annotation /// 6564 // L-serine biosynthesis // inferred from electronic annotation /// 8652 // amino acid biosynthesis // inferred from electronic annotation /// 8152 // metabolism // inferred from electronic annotation	---	IPR006140 // D-isomer specific 2-hydroxyacid dehydrogenase, NAD binding domain // 5.7E-75 /// IPR006139 // D-isomer specific 2-hydroxyacid dehydrogenase, catalytic domain // 3.2E-25
4757	145956_at	1.14246	2.45762	7.46729	1.88e-08	1.6e-07	8.93558	FBgn0031913	CG5958	CG5958	CG5958	34022	5386 // carrier activity // inferred from electronic annotation /// 16918 // retinal binding // inferred from sequence or structural similarity /// 5215 // transporter activity // inferred from electronic annotation /// 16918 // retinal binding // inferred from sequence similarity	6732 // coenzyme metabolism // inferred from electronic annotation /// 6810 // transport // inferred from electronic annotation /// 51189 // prosthetic group metabolism // inferred from electronic annotation	5622 // intracellular // inferred from electronic annotation	IPR001251 // Cellular retinaldehyde-binding)/triple function, C-terminal // 1.2E-30
10968	152167_at	1.14103	3.32036	8.72908	6.55e-10	8.8e-09	12.322	FBgn0034871	CG3906	CG3906	CG3906	37721	---	---	---	---
11783	152982_at	1.14036	1.47617	10.0865	2.22e-11	4.61e-10	15.7396	FBgn0035231	CG18330	Cct2	CTP:phosphocholine cytidylyltransferase 2	38180	4105 // choline-phosphate cytidylyltransferase activity // inferred from direct assay /// 4105 // choline-phosphate cytidylyltransferase activity // inferred from sequence or structural similarity /// 16779 // nucleotidyltransferase activity // inferred from electronic annotation /// 4105 // choline-phosphate cytidylyltransferase activity // inferred from sequence similarity	6644 // phospholipid metabolism // inferred from electronic annotation /// 9058 // biosynthesis // inferred from electronic annotation	---	IPR004820 // Cytidylyltransferase // 8.2E-32
8148	149347_at	1.13357	0.449712	5.84712	1.8e-06	8.2e-06	4.35621	FBgn0037363	CG1347	CG1347	CG1347	40700	---	---	---	---
4481	145680_at	1.13102	1.93885	11.1632	1.8e-12	5.04e-11	18.279	FBgn0051694	CG31694	CG31694	CG31694	33489	5102 // receptor binding // inferred from electronic annotation /// 16787 // hydrolase activity // inferred from electronic annotation /// 16799 // hydrolase activity, hydrolyzing N-glycosyl compounds // inferred from electronic annotation	7275 // development // inferred from electronic annotation /// 7398 // ectoderm development // inferred from electronic annotation /// 7399 // nervous system development // inferred from electronic annotation	---	IPR006921 // Interferon-related protein conserved region // 1.4E-16 /// IPR007701 // Interferon-related developmental regulator // 1.0E-126
13142	154341_at	1.12798	1.6358	8.91476	4.07e-10	5.8e-09	12.8038	FBgn0038818	CG4058	Nep4	Neprilysin 4	42449	4222 // metalloendopeptidase activity // inferred from sequence or structural similarity /// 4245 // neprilysin activity // inferred from electronic annotation /// 8270 // zinc ion binding // inferred from electronic annotation /// 16511 // endothelin-converting enzyme activity // inferred from sequence or structural similarity /// 8233 // peptidase activity // inferred from electronic annotation…	6508 // proteolysis // inferred from electronic annotation /// 7165 // signal transduction // inferred from electronic annotation	16020 // membrane // inferred from electronic annotation	IPR008753 // Peptidase M13 // 2.3E-15 /// IPR008753 // Peptidase M13 // 2.4E-93 /// IPR000718 // Peptidase M13, neprilysin // 7.2E-73 /// IPR008753 // Peptidase M13 // 2.3E-15 /// IPR008753 // Peptidase M13 // 2.4E-93 /// IPR000718 // Peptidase M13, neprilysin // 7.2E-73
11457	152656_at	1.12787	3.90505	11.2462	1.49e-12	4.24e-11	18.4686	FBgn0020304	CG3365	drongo	drongo	33263	5215 // transporter activity // inferred from electronic annotation	6139 // nucleobase, nucleoside, nucleotide and nucleic acid metabolism // inferred from electronic annotation /// 6810 // transport // inferred from electronic annotation /// 15931 // nucleobase, nucleoside, nucleotide and nucleic acid transport // inferred from electronic annotation /// 43087 // regulation of GTPase activity // inferred from electronic annotation	---	IPR001164 // Human Rev interacting-like protein (hRIP) // 2.5E-28
11581	152780_at	1.12256	1.41251	7.17859	4.16e-08	3.17e-07	8.13531	FBgn0035251	CG7967	CG7967	CG7967	38204	5515 // protein binding // inferred from physical interaction	---	---	IPR006745 // Protein of unknown function DUF605 // 1.0E-126
12121	153320_at	1.12013	1.51504	9.596	7.34e-11	1.3e-09	14.5327	FBgn0039260	CG6369	Smg6	Smg6	42994	5488 // binding // inferred from electronic annotation	184 // mRNA catabolism, nonsense-mediated decay // inferred from mutant phenotype	---	---
8278	149477_at	1.11897	0.0546767	10.2057	1.67e-11	3.62e-10	16.0282	FBgn0037562	CG11671	CG11671	CG11671	40976	---	---	---	---
11348	152547_at	1.1177	3.4636	19.1542	6.72e-19	1.85e-16	33.1385	FBgn0033385	CG8055	CG8055	CG8055	35933	5386 // carrier activity // inferred from electronic annotation /// 5488 // binding // inferred from electronic annotation /// 5515 // protein binding // inferred from physical interaction /// 42802 // identical protein binding // inferred from physical interaction	6886 // intracellular protein transport // inferred from electronic annotation	---	IPR005024 // Snf7 // 4.7E-72
13141	154340_at	1.11116	0.709818	7.33686	2.69e-08	2.18e-07	8.57507	FBgn0030986	CG7481	RhoGAP18B	RhoGAP18B	32898	5083 // small GTPase regulator activity // inferred from electronic annotation /// 5096 // GTPase activator activity // inferred from sequence or structural similarity /// 5515 // protein binding // inferred from physical interaction /// 5096 // GTPase activator activity // inferred from sequence similarity	7015 // actin filament organization // inferred from mutant phenotype /// 7242 // intracellular signaling cascade // inferred from electronic annotation	---	IPR000198 // RhoGAP domain // 2.2E-57
66	141265_at	1.11112	1.65264	11.0044	2.58e-12	6.91e-11	17.914	FBgn0040475	CG6757	SH3PX1	SH3PX1	39136	5515 // protein binding // inferred from physical interaction /// 5515 // protein binding // inferred from electronic annotation /// 35091 // phosphoinositide binding // inferred from electronic annotation	6886 // intracellular protein transport // inferred from sequence or structural similarity /// 7242 // intracellular signaling cascade // inferred from electronic annotation /// 6886 // intracellular protein transport // inferred from sequence similarity	---	IPR001452 // SH3 // 7.0E-17 /// IPR001683 // Phox-like // 3.9E-37
10149	151348_f_at	1.10658	0.797649	3.54466	0.00125394	0.00276439	-2.09681	---	---	---	---	---	---	---	---	---
1099	142298_at	1.10391	1.23501	7.60464	1.29e-08	1.17e-07	9.31322	FBgn0033495	CG12214	CG12214	CG12214	36072	5216 // ion channel activity // inferred from electronic annotation /// 5249 // voltage-gated potassium channel activity // inferred from electronic annotation /// 5261 // cation channel activity // inferred from electronic annotation /// 5267 // potassium channel activity // inferred from electronic annotation	6810 // transport // inferred from electronic annotation /// 6811 // ion transport // inferred from electronic annotation /// 6812 // cation transport // inferred from electronic annotation /// 6813 // potassium ion transport // inferred from electronic annotation	8076 // voltage-gated potassium channel complex // inferred from electronic annotation /// 16020 // membrane // inferred from electronic annotation /// 16021 // integral to membrane // inferred from electronic annotation	IPR001611 // Leucine-rich repeat // 0.97
5565	146764_at	1.1039	1.68589	3.91762	0.000450801	0.00111271	-1.10602	FBgn0042135	CG18812	CG18812	CG18812	59173	---	---	---	IPR002589 // Protein of unknown function Appr-1 // 4.2E-13
3388	144587_f_at	1.09235	6.18036	4.4379	0.00010405	0.000301311	0.32892	FBgn0052744	CG32744	CG32744	CG32744	326237	---	6508 // proteolysis // inferred from electronic annotation /// 19538 // protein metabolism // inferred from electronic annotation /// 6464 // protein modification // inferred from electronic annotation	---	IPR000626 // Ubiquitin // 3.8E-43 /// IPR000626 // Ubiquitin // 3.8E-43 /// IPR000626 // Ubiquitin // 3.8E-43 /// IPR000626 // Ubiquitin // 3.8E-43 /// IPR000626 // Ubiquitin // 3.8E-43 /// IPR000626 // Ubiquitin // 3.8E-43 /// IPR000626 // Ubiquitin // 3.8E-43
13253	154452_at	1.09227	3.08502	10.631	6.12e-12	1.49e-10	17.0427	FBgn0040236	CG12132	c11.1	c11.1	53436	5515 // protein binding // inferred from physical interaction /// 5488 // binding // inferred from electronic annotation	---	---	---
6007	147206_at	1.08942	0.862808	7.51294	1.66e-08	1.44e-07	9.06132	FBgn0001332	CG10109	L	Lobe	44831	5515 // protein binding // inferred from physical interaction	45570 // regulation of imaginal disc growth // inferred from mutant phenotype /// 7219 // Notch signaling pathway // inferred from direct assay	---	---
9028	150227_at	1.08501	0.541393	11.4722	8.99e-13	2.7e-11	18.9804	FBgn0038744	CG4733	CG4733	CG4733	42368	5230 // extracellular ligand-gated ion channel activity // inferred from electronic annotation /// 5509 // calcium ion binding // inferred from electronic annotation /// 8601 // protein phosphatase type 2A regulator activity // inferred from sequence or structural similarity /// 8601 // protein phosphatase type 2A regulator activity // inferred from sequence similarity	6810 // transport // inferred from electronic annotation /// 7165 // signal transduction // inferred from electronic annotation	16020 // membrane // inferred from electronic annotation	IPR002048 // Calcium-binding EF-hand // 9.4E-4 /// IPR006202 // Neurotransmitter-gated ion-channel ligand binding domain // 0.09
9489	150688_at	1.08389	1.12301	5.40148	6.5e-06	2.54e-05	3.07447	FBgn0051072	CG31072	Lerp	Lerp	43223	4872 // receptor activity // inferred from sequence or structural similarity /// 5215 // transporter activity // inferred from electronic annotation /// 5515 // protein binding // inferred from physical interaction /// 4872 // receptor activity // inferred from electronic annotation /// 4872 // receptor activity // inferred from sequence similarity	6810 // transport // inferred from electronic annotation /// 6892 // post-Golgi vesicle-mediated transport // inferred from direct assay /// 7041 // lysosomal transport // inferred from direct assay	5737 // cytoplasm // Unknown /// 5764 // lysosome // inferred from electronic annotation /// 16020 // membrane // inferred from electronic annotation /// 5737 // cytoplasm // inferred from curator	---
1776	142975_at	1.082	3.41151	10.2316	1.57e-11	3.43e-10	16.0907	FBgn0011673	CG7438	Myo31DF	Myosin 31DF	34445	3774 // motor activity // non-traceable author statement /// 3779 // actin binding // non-traceable author statement /// 5200 // structural constituent of cytoskeleton // inferred from electronic annotation /// 5524 // ATP binding // inferred from electronic annotation /// 42623 // ATPase activity, coupled // inferred from sequence or structural similarity /// 166 // nucleotide binding // inferre…	6886 // intracellular protein transport // inferred from electronic annotation /// 7498 // mesoderm development // inferred from expression pattern /// 7601 // visual perception // inferred from electronic annotation /// 7605 // sensory perception of sound // inferred from electronic annotation /// 16192 // vesicle-mediated transport // inferred from electronic annotation	5737 // cytoplasm // non-traceable author statement /// 16459 // myosin // inferred from sequence or structural similarity /// 16459 // myosin // inferred from electronic annotation /// 16459 // myosin // inferred from sequence similarity	IPR001609 // Myosin head (motor domain) // 1.0E-126 /// IPR000048 // IQ calmodulin-binding region // 3.1E-5 /// IPR010926 // Myosin tail 2 // 9.5E-74
12214	153413_at	1.07499	2.5368	10.6922	5.31e-12	1.31e-10	17.1866	FBgn0015801	CG2928	Reg-5	Rhythmically expressed gene 5	37968	---	7623 // circadian rhythm // non-traceable author statement /// 48511 // rhythmic process // inferred from electronic annotation	---	---
10510	151709_r_at	1.07355	2.83649	6.17429	7.05e-07	3.61e-06	5.29472	FBgn0030301	CG1745	CG1745	CG1745	32090	---	---	---	---
2374	143573_at	1.06884	1.12424	6.0056	1.14e-06	5.5e-06	4.81129	FBgn0005672	CG10334	spi	spitz	35253	5154 // epidermal growth factor receptor binding // non-traceable author statement /// 5154 // epidermal growth factor receptor binding // traceable author statement /// 5155 // epidermal growth factor receptor activating ligand activity // non-traceable author statement /// 8317 // gurken receptor binding // non-traceable author statement /// 5515 // protein binding // inferred from physical int…	86 // G2/M transition of mitotic cell cycle // non-traceable author statement /// 6916 // anti-apoptosis // non-traceable author statement /// 7173 // epidermal growth factor receptor signaling pathway // non-traceable author statement /// 7173 // epidermal growth factor receptor signaling pathway // traceable author statement /// 7422 // peripheral nervous system development // inferred from mut…	5576 // extracellular region // non-traceable author statement /// 5576 // extracellular region // traceable author statement /// 5783 // endoplasmic reticulum // inferred from direct assay /// 5783 // endoplasmic reticulum // non-traceable author statement /// 5794 // Golgi apparatus // inferred from genetic interaction /// 5886 // plasma membrane // non-traceable author statement /// 16021 // i…	IPR006209 // EGF-like domain // 4.0E-6
10023	151222_at	1.0668	-0.202262	16.7986	2.91e-17	3.96e-15	29.3794	FBgn0034004	CG33466	Fs	Fs	2768836	17106 // activin inhibitor activity // non-traceable author statement	19725 // cell homeostasis // inferred from electronic annotation	---	IPR002350 // Serine protease inhibitor, Kazal type // 1.2E-14 /// IPR002350 // Serine protease inhibitor, Kazal type // 3.6E-9 /// IPR002350 // Serine protease inhibitor, Kazal type // 2.7E-7
1	141200_at	1.06638	0.705029	14.2148	3.07e-15	2.05e-13	24.7062	FBgn0026582	CG9418	CG9418	CG9418	37407	3677 // DNA binding // inferred from sequence or structural similarity /// 30528 // transcription regulator activity // inferred from electronic annotation /// 5515 // protein binding // inferred from physical interaction /// 3677 // DNA binding // inferred from electronic annotation /// 3677 // DNA binding // inferred from sequence similarity	6355 // regulation of transcription, DNA-dependent // inferred from electronic annotation /// 6367 // transcription initiation from RNA polymerase II promoter // inferred from electronic annotation	---	IPR000910 // HMG1/2 (high mobility group) box // 5.2E-16
7440	148639_at	1.04719	4.5425	12.2118	1.79e-13	6.73e-12	20.6108	FBgn0036262	CG6910	CG6910	CG6910	39391	16491 // oxidoreductase activity // inferred from electronic annotation	5975 // carbohydrate metabolism // inferred from electronic annotation /// 6139 // nucleobase, nucleoside, nucleotide and nucleic acid metabolism // inferred from electronic annotation	---	IPR007828 // Protein of unknown function DUF706 // 1.0E-126
11758	152957_at	1.04708	2.4403	6.67852	1.68e-07	1.05e-06	6.73047	FBgn0052103	CG32103	CG32103	CG32103	39415	5386 // carrier activity // inferred from sequence or structural similarity /// 5488 // binding // inferred from electronic annotation /// 5509 // calcium ion binding // inferred from electronic annotation /// 5386 // carrier activity // inferred from sequence similarity	6810 // transport // inferred from sequence or structural similarity /// 6812 // cation transport // inferred from electronic annotation /// 6810 // transport // inferred from electronic annotation /// 6810 // transport // inferred from sequence similarity	5740 // mitochondrial envelope // inferred from sequence or structural similarity /// 5743 // mitochondrial inner membrane // inferred from electronic annotation /// 5778 // peroxisomal membrane // inferred from sequence or structural similarity /// 16020 // membrane // inferred from electronic annotation /// 16021 // integral to membrane // inferred from electronic annotation /// 5740 // mitocho…	IPR001993 // Mitochondrial substrate carrier // 4.5E-31 /// IPR001993 // Mitochondrial substrate carrier // 1.9E-35 /// IPR001993 // Mitochondrial substrate carrier // 2.2E-24 /// IPR001993 // Mitochondrial substrate carrier // 4.5E-31 /// IPR001993 // Mitochondrial substrate carrier // 1.9E-35 /// IPR001993 // Mitochondrial substrate carrier // 2.2E-24 /// IPR002048 // Calcium-binding EF-hand //…
4148	145347_at	1.045	0.546574	5.61748	3.49e-06	1.46e-05	3.69583	FBgn0030987	CG7502	CG7502	CG7502	32899	---	---	---	---
666	141865_r_at	1.0447	5.40867	4.9746	2.23e-05	7.58e-05	1.84992	---	---	---	---	---	---	---	---	---
2585	143784_at	1.03838	5.45138	12.0041	2.8e-13	1e-11	20.1597	FBgn0015221	CG1469	Fer2LCH	Ferritin 2 light chain homologue	44965	8198 // ferrous iron binding // inferred from direct assay /// 8199 // ferric iron binding // inferred from electronic annotation	6879 // iron ion homeostasis // inferred from direct assay /// 6879 // iron ion homeostasis // inferred from electronic annotation	8043 // ferritin complex // inferred from direct assay	---
12137	153336_at	1.03581	2.8488	9.65791	6.3e-11	1.13e-09	14.6868	FBgn0002069	CG3821	Aats-asp	Aspartyl-tRNA synthetase	36420	3729 // mRNA binding // inferred from electronic annotation /// 4815 // aspartate-tRNA ligase activity // inferred from sequence or structural similarity /// 5524 // ATP binding // inferred from electronic annotation /// 5515 // protein binding // inferred from physical interaction /// 3676 // nucleic acid binding // inferred from electronic annotation /// 4812 // aminoacyl-tRNA ligase activity /…	6422 // aspartyl-tRNA aminoacylation // inferred from sequence or structural similarity /// 40007 // growth // inferred from mutant phenotype /// 6418 // tRNA aminoacylation for protein translation // inferred from electronic annotation /// 6422 // aspartyl-tRNA aminoacylation // inferred from electronic annotation /// 6422 // aspartyl-tRNA aminoacylation // inferred from sequence similarity	5737 // cytoplasm // inferred from electronic annotation	IPR004365 // OB-fold nucleic acid binding domain // 3.7E-14 /// IPR004364 // tRNA synthetase, class II (D, K and N) // 1.0E-126
2583	143782_at	1.03496	2.96873	12.0305	2.64e-13	9.58e-12	20.2173	FBgn0015037	CG10842	Cyp4p1	Cytochrome P450-4p1	45524	4497 // monooxygenase activity // inferred from electronic annotation /// 16491 // oxidoreductase activity // inferred from electronic annotation /// 5515 // protein binding // inferred from physical interaction /// 5506 // iron ion binding // inferred from electronic annotation /// 20037 // heme binding // inferred from electronic annotation /// 46872 // metal ion binding // inferred from electr…	6118 // electron transport // inferred from electronic annotation /// 8202 // steroid metabolism // inferred from electronic annotation	5792 // microsome // non-traceable author statement /// 16020 // membrane // non-traceable author statement /// 5783 // endoplasmic reticulum // inferred from electronic annotation /// 5792 // microsome // inferred from electronic annotation /// 16020 // membrane // inferred from electronic annotation	IPR001128 // Cytochrome P450 // 7.7E-79
13408	154607_at	1.03318	2.3019	11.2701	1.41e-12	4.04e-11	18.5231	FBgn0028420	CG18783	Kr-h1	Kruppel homolog 1	33861	3700 // transcription factor activity // non-traceable author statement /// 8270 // zinc ion binding // inferred from electronic annotation /// 3676 // nucleic acid binding // inferred from electronic annotation /// 3677 // DNA binding // inferred from electronic annotation /// 46872 // metal ion binding // inferred from electronic annotation	6357 // regulation of transcription from RNA polymerase II promoter // inferred from electronic annotation /// 7552 // metamorphosis // non-traceable author statement /// 8283 // cell proliferation // inferred from electronic annotation /// 35075 // response to ecdysone // inferred from mutant phenotype /// 45449 // regulation of transcription // non-traceable author statement /// 46698 // metamo…	5634 // nucleus // non-traceable author statement /// 5634 // nucleus // inferred from electronic annotation	IPR007087 // Zn-finger, C2H2 type // 3.3E-6 /// IPR007087 // Zn-finger, C2H2 type // 1.3E-5 /// IPR007087 // Zn-finger, C2H2 type // 1.0E-6 /// IPR007087 // Zn-finger, C2H2 type // 2.2E-6 /// IPR007087 // Zn-finger, C2H2 type // 1.0E-4 /// IPR007087 // Zn-finger, C2H2 type // 7.8E-6 /// IPR007087 // Zn-finger, C2H2 type // 3.3E-6 /// IPR007087 // Zn-finger, C2H2 type // 1.3E-5 /// IPR007087 // Zn…
2603	143802_at	1.03187	0.981795	12.2448	1.67e-13	6.36e-12	20.6821	FBgn0015351	CG14906	CG14906	CG14906	42030	8168 // methyltransferase activity // inferred from electronic annotation	6139 // nucleobase, nucleoside, nucleotide and nucleic acid metabolism // inferred from electronic annotation	5634 // nucleus // inferred from electronic annotation	IPR007757 // MT-A70 // 9.4E-92
10879	152078_at	1.03098	1.54682	17.0956	1.77e-17	2.73e-15	29.8777	FBgn0031824	CG9547	CG9547	CG9547	33911	4361 // glutaryl-CoA dehydrogenase activity // inferred from sequence or structural similarity /// 5515 // protein binding // inferred from physical interaction /// 3995 // acyl-CoA dehydrogenase activity // inferred from electronic annotation /// 16491 // oxidoreductase activity // inferred from electronic annotation /// 4361 // glutaryl-CoA dehydrogenase activity // inferred from sequence simil…	6118 // electron transport // inferred from electronic annotation /// 6554 // lysine catabolism // inferred from sequence or structural similarity /// 6568 // tryptophan metabolism // inferred from sequence or structural similarity /// 6637 // acyl-CoA metabolism // inferred from electronic annotation /// 46948 // hydroxylysine catabolism // inferred from sequence or structural similarity /// 655…	5759 // mitochondrial matrix // inferred from sequence or structural similarity /// 5759 // mitochondrial matrix // inferred from sequence similarity	IPR006091 // Acyl-CoA dehydrogenase, central domain // 2.6E-16 /// IPR006092 // Acyl-CoA dehydrogenase, N-terminal // 2.1E-13 /// IPR006090 // Acyl-CoA dehydrogenase, C-terminal // 5.8E-42
10129	151328_i_at	1.02695	-1.18217	6.38778	3.83e-07	2.14e-06	5.90455	---	---	---	---	---	---	---	---	---
1497	142696_at	1.02665	3.61109	4.98577	2.16e-05	7.37e-05	1.88185	FBgn0028473	CG8801	CG8801	CG8801	35963	3924 // GTPase activity // inferred from electronic annotation /// 5525 // GTP binding // inferred from sequence or structural similarity /// 5525 // GTP binding // non-traceable author statement /// 166 // nucleotide binding // inferred from electronic annotation /// 5525 // GTP binding // inferred from electronic annotation /// 5525 // GTP binding // inferred from sequence similarity	8283 // cell proliferation // inferred from electronic annotation /// 7046 // ribosome biogenesis // inferred from electronic annotation	5634 // nucleus // non-traceable author statement /// 5634 // nucleus // inferred from electronic annotation	IPR010674 // Nucleolar GTP-binding 1 // 3.3E-38
8035	149234_at	1.0241	0.623339	17.0186	2.01e-17	2.97e-15	29.7492	FBgn0037167	CG11425	CG11425	CG11425	40472	8195 // phosphatidate phosphatase activity // inferred from sequence or structural similarity /// 8195 // phosphatidate phosphatase activity // non-traceable author statement /// 8195 // phosphatidate phosphatase activity // inferred from sequence similarity	6629 // lipid metabolism // inferred from electronic annotation /// 16311 // dephosphorylation // non-traceable author statement	---	IPR000326 // PA-phosphatase related phosphoesterase // 4.5E-45
2200	143399_at	1.01784	6.13812	6.74722	1.39e-07	8.91e-07	6.92473	FBgn0003943	CG11624	Ubi-p63E	Ubiquitin-63E	38456	5515 // protein binding // inferred from sequence or structural similarity /// 5515 // protein binding // inferred from sequence similarity	6325 // establishment and/or maintenance of chromatin architecture // non-traceable author statement /// 6355 // regulation of transcription, DNA-dependent // non-traceable author statement /// 6464 // protein modification // inferred from sequence or structural similarity /// 6510 // ATP-dependent proteolysis // non-traceable author statement /// 6511 // ubiquitin-dependent protein catabolism //…	5634 // nucleus // non-traceable author statement /// 5737 // cytoplasm // non-traceable author statement	IPR000626 // Ubiquitin // 3.8E-43 /// IPR000626 // Ubiquitin // 3.8E-43 /// IPR000626 // Ubiquitin // 3.8E-43 /// IPR000626 // Ubiquitin // 3.8E-43 /// IPR000626 // Ubiquitin // 3.8E-43 /// IPR000626 // Ubiquitin // 3.8E-43 /// IPR000626 // Ubiquitin // 3.8E-43 /// IPR000626 // Ubiquitin // 3.8E-43 /// IPR000626 // Ubiquitin // 3.8E-43 /// IPR000626 // Ubiquitin // 3.8E-43
9088	150287_at	1.01705	1.72374	14.515	1.73e-15	1.26e-13	25.2824	FBgn0038842	CG5630	CG5630	CG5630	42478	5515 // protein binding // inferred from physical interaction	---	---	---
6245	147444_at	1.01252	1.23996	12.971	3.64e-14	1.71e-12	22.2163	FBgn0034356	CG10924	CG10924	CG10924	37130	4613 // phosphoenolpyruvate carboxykinase (GTP) activity // inferred from sequence or structural similarity /// 5215 // transporter activity // inferred from electronic annotation /// 5525 // GTP binding // inferred from electronic annotation /// 5515 // protein binding // inferred from physical interaction /// 4611 // phosphoenolpyruvate carboxykinase activity // inferred from electronic annotat…	6094 // gluconeogenesis // inferred from sequence or structural similarity /// 6810 // transport // inferred from electronic annotation /// 6094 // gluconeogenesis // inferred from electronic annotation /// 6094 // gluconeogenesis // inferred from sequence similarity	5739 // mitochondrion // inferred from sequence or structural similarity /// 5739 // mitochondrion // inferred from sequence similarity	IPR008209 // Phosphoenolpyruvate carboxykinase (GTP) // 1.0E-126
9133	150332_at	1.01104	1.37822	5.5923	3.75e-06	1.56e-05	3.62337	FBgn0038909	CG6569	CG6569	CG6569	42573	5515 // protein binding // inferred from physical interaction	---	---	---
1998	143197_at	1.01056	2.04211	4.64905	5.69e-05	0.000175221	0.923711	FBgn0001230	CG5436	Hsp68	Heat shock protein 68	42852	5524 // ATP binding // inferred from electronic annotation /// 51082 // unfolded protein binding // inferred from sequence or structural similarity /// 166 // nucleotide binding // inferred from electronic annotation /// 51082 // unfolded protein binding // inferred from sequence similarity	6457 // protein folding // inferred from electronic annotation /// 6457 // protein folding // inferred from sequence or structural similarity /// 6461 // protein complex assembly // inferred from electronic annotation /// 6952 // defense response // inferred from electronic annotation /// 8340 // determination of adult life span // inferred from mutant phenotype /// 9408 // response to heat // in…	5739 // mitochondrion // inferred from sequence or structural similarity /// 5739 // mitochondrion // inferred from sequence similarity	IPR001023 // Heat shock protein Hsp70 // 1.0E-126
3261	144460_at	1.00882	0.587534	11.18	1.73e-12	4.87e-11	18.3174	FBgn0029689	CG6428	CG6428	CG6428	31351	4067 // asparaginase activity // inferred from electronic annotation /// 4622 // lysophospholipase activity // inferred from sequence or structural similarity /// 5515 // protein binding // inferred from physical interaction /// 4622 // lysophospholipase activity // inferred from sequence similarity	9063 // amino acid catabolism // inferred from electronic annotation /// 6520 // amino acid metabolism // inferred from electronic annotation	---	IPR006034 // Asparaginase/glutaminase // 1.2E-53 /// IPR002110 // Ankyrin // 3.8E-11 /// IPR002110 // Ankyrin // 2.1E-4 /// IPR002110 // Ankyrin // 2.7E-5 /// IPR002110 // Ankyrin // 24.0
6120	147319_at	1.00787	3.10555	6.39479	3.76e-07	2.1e-06	5.92453	FBgn0034140	CG8317	CG8317	CG8317	36853	---	---	---	---
13009	154208_at	1.00586	2.37377	9.13737	2.31e-10	3.57e-09	13.3754	FBgn0029820	CG16721	CG16721	CG16721	31520	4872 // receptor activity // inferred from electronic annotation /// 5515 // protein binding // inferred from physical interaction	7275 // development // inferred from electronic annotation /// 7276 // gametogenesis // inferred from electronic annotation /// 7283 // spermatogenesis // inferred from electronic annotation	---	IPR008862 // T-complex 11 // 1.0E-126
12032	153231_at	1.00526	1.3682	7.37446	2.43e-08	1.99e-07	8.67918	FBgn0033234	CG8791	CG8791	CG8791	35745	5316 // high affinity inorganic phosphate:sodium symporter activity // inferred from sequence or structural similarity /// 5215 // transporter activity // inferred from electronic annotation /// 5316 // high affinity inorganic phosphate:sodium symporter activity // inferred from sequence similarity	6796 // phosphate metabolism // inferred from electronic annotation /// 6812 // cation transport // inferred from electronic annotation /// 6817 // phosphate transport // inferred from electronic annotation /// 6858 // extracellular transport // inferred from electronic annotation /// 6810 // transport // inferred from electronic annotation	16021 // integral to membrane // inferred from electronic annotation /// 16020 // membrane // inferred from electronic annotation	---
1836	143035_at	1.00409	2.90891	3.12739	0.00378358	0.00742201	-3.15296	FBgn0038745	CG4538	CG4538	CG4538	42369	166 // nucleotide binding // inferred from electronic annotation /// 5515 // protein binding // inferred from electronic annotation /// 5524 // ATP binding // inferred from electronic annotation /// 8462 // endopeptidase Clp activity // inferred from sequence or structural similarity /// 16887 // ATPase activity // inferred from electronic annotation /// 17111 // nucleoside-triphosphatase activit…	6457 // protein folding // inferred from electronic annotation /// 6510 // ATP-dependent proteolysis // inferred from sequence or structural similarity /// 15031 // protein transport // inferred from electronic annotation /// 6510 // ATP-dependent proteolysis // inferred from sequence similarity	5739 // mitochondrion // inferred from sequence or structural similarity /// 9368 // endopeptidase Clp complex // inferred from sequence or structural similarity /// 5739 // mitochondrion // inferred from sequence similarity /// 9368 // endopeptidase Clp complex // inferred from sequence similarity	IPR003959 // AAA ATPase, central region // 6.7E-27
8221	149420_at	0.999069	2.55364	12.6049	7.78e-14	3.35e-12	21.4505	FBgn0037468	CG1943	CG1943	CG1943	40844	5515 // protein binding // inferred from physical interaction	---	---	---
11817	153016_r_at	0.993637	4.25568	7.67071	1.08e-08	9.96e-08	9.49415	FBgn0051534	CG31534	CG31534	CG31534	40585	8270 // zinc ion binding // inferred from electronic annotation	---	---	IPR001781 // Zn-binding protein, LIM // 2.2E-6
12801	154000_at	0.99304	2.2906	13.9397	5.23e-15	3.26e-13	24.17	FBgn0027532	CG7139	CG7139	CG7139	40448	3684 // damaged DNA binding // inferred from electronic annotation /// 5524 // ATP binding // inferred from electronic annotation /// 5515 // protein binding // inferred from physical interaction	6298 // mismatch repair // inferred from electronic annotation	---	IPR002625 // Smr protein/MutS2 C-terminal // 2.0E-33 /// IPR002625 // Smr protein/MutS2 C-terminal // 2.0E-33
365	141564_at	0.992372	1.91181	11.568	7.27e-13	2.26e-11	19.1954	FBgn0037391	CG2017	CG2017	CG2017	40733	5525 // GTP binding // inferred from sequence or structural similarity /// 5515 // protein binding // inferred from physical interaction /// 5525 // GTP binding // inferred from electronic annotation /// 5525 // GTP binding // inferred from sequence similarity	6412 // protein biosynthesis // inferred from electronic annotation	---	IPR004161 // Elongation factor Tu, domain 2 // 9.8E-9 /// IPR004161 // Elongation factor Tu, domain 2 // 9.8E-9
12360	153559_at	0.99231	1.35806	12.2672	1.59e-13	6.11e-12	20.7304	FBgn0051216	CG31216	CG31216	CG31216	42348	5509 // calcium ion binding // inferred from electronic annotation /// 16787 // hydrolase activity // inferred from electronic annotation /// 3824 // catalytic activity // inferred from electronic annotation	6732 // coenzyme metabolism // inferred from electronic annotation /// 6807 // nitrogen compound metabolism // inferred from electronic annotation /// 51189 // prosthetic group metabolism // inferred from electronic annotation /// 8152 // metabolism // inferred from electronic annotation	---	IPR002048 // Calcium-binding EF-hand // 0.0023 /// IPR002048 // Calcium-binding EF-hand // 1.0E-7 /// IPR000868 // Isochorismatase hydrolase // 2.6E-15
2506	143705_r_at	0.991466	5.83375	6.0423	1.03e-06	5.01e-06	4.91657	FBgn0013301	CG4478	Mst35Bb	Male-specific-transcript-35Bb	34867	3677 // DNA binding // inferred from sequence or structural similarity /// 3677 // DNA binding // inferred from sequence similarity	---	---	IPR010477 // Protein of unknown function DUF1074 // 2.8E-87
2819	144018_at	0.988011	0.762402	13.5479	1.13e-14	6.48e-13	23.3922	FBgn0024361	CG11415	Tsp2A	Tetraspanin 2A	31080	---	---	16021 // integral to membrane // inferred from sequence or structural similarity /// 16021 // integral to membrane // inferred from electronic annotation /// 16021 // integral to membrane // inferred from sequence similarity	IPR000301 // CD9/CD37/CD63 antigen // 1.2E-47
8089	149288_at	0.987499	-0.158877	8.60611	9.01e-10	1.17e-08	12.0006	FBgn0051531	CG31531	CG31531	CG31531	40583	---	---	---	---
12941	154140_at	0.984144	1.29691	13.206	2.25e-14	1.15e-12	22.7	FBgn0032342	CG4713	CG4713	CG4713	34543	---	---	---	IPR000008 // C2 domain // 1.5E-4
2368	143567_r_at	0.982808	6.30876	4.19085	0.000209678	0.00056061	-0.358744	FBgn0005648	CG2163	Pabp2	Pabp2	35788	3729 // mRNA binding // inferred from sequence or structural similarity /// 8143 // poly(A) binding // inferred from sequence or structural similarity /// 5515 // protein binding // inferred from physical interaction /// 42802 // identical protein binding // inferred from physical interaction /// 166 // nucleotide binding // inferred from electronic annotation /// 3676 // nucleic acid binding // …	6378 // mRNA polyadenylylation // inferred from sequence or structural similarity /// 6378 // mRNA polyadenylylation // inferred from sequence similarity	5634 // nucleus // inferred from sequence or structural similarity /// 5634 // nucleus // inferred from sequence similarity	IPR000504 // RNA-binding region RNP-1 (RNA recognition motif) // 4.9E-20
563	141762_at	0.981659	4.59807	13.1134	2.72e-14	1.32e-12	22.5102	FBgn0013770	CG6692	Cp1	Cysteine proteinase-1	36546	3676 // nucleic acid binding // inferred from electronic annotation /// 4217 // cathepsin L activity // inferred from sequence or structural similarity /// 4217 // cathepsin L activity // non-traceable author statement /// 5515 // protein binding // inferred from physical interaction /// 4197 // cysteine-type endopeptidase activity // inferred from electronic annotation /// 8233 // peptidase acti…	6355 // regulation of transcription, DNA-dependent // inferred from electronic annotation /// 6508 // proteolysis // inferred from electronic annotation /// 30163 // protein catabolism // non-traceable author statement /// 35071 // salivary gland cell autophagic cell death // inferred from expression pattern /// 48102 // autophagic cell death // inferred from expression pattern /// 7275 // develo…	5764 // lysosome // non-traceable author statement /// 5764 // lysosome // inferred from electronic annotation	IPR000668 // Peptidase C1A, papain // 1.0E-126 /// IPR000668 // Peptidase C1A, papain // 1.0E-126
10322	151521_r_at	0.980326	4.8437	5.39703	6.59e-06	2.57e-05	3.06166	FBgn0003475	CG10076	spir	spire	45931	3779 // actin binding // non-traceable author statement /// 3779 // actin binding // traceable author statement /// 5515 // protein binding // inferred from physical interaction /// 8270 // zinc ion binding // inferred from electronic annotation	7304 // eggshell formation (sensu Insecta) // inferred from mutant phenotype /// 7315 // pole plasm assembly // inferred from mutant phenotype /// 7315 // pole plasm assembly // non-traceable author statement /// 7315 // pole plasm assembly // traceable author statement /// 7316 // pole plasm RNA localization // inferred from mutant phenotype /// 9993 // oogenesis (sensu Insecta) // traceable aut…	---	---
10475	151674_r_at	0.978875	1.90813	6.54193	2.48e-07	1.47e-06	6.34318	FBgn0023416	---	Ac3	Ac3	35419	4016 // adenylate cyclase activity // inferred from direct assay /// 4016 // adenylate cyclase activity // inferred from sequence or structural similarity /// 4016 // adenylate cyclase activity // non-traceable author statement /// 4383 // guanylate cyclase activity // inferred from electronic annotation /// 16829 // lyase activity // inferred from electronic annotation /// 16849 // phosphorus-ox…	6171 // cAMP biosynthesis // inferred from direct assay /// 7186 // G-protein coupled receptor protein signaling pathway // inferred from electronic annotation /// 7242 // intracellular signaling cascade // inferred from electronic annotation /// 9187 // cyclic nucleotide metabolism // inferred from electronic annotation /// 9190 // cyclic nucleotide biosynthesis // inferred from electronic annot…	16021 // integral to membrane // non-traceable author statement	---
292	141491_at	0.975018	1.04231	14.9799	7.26e-16	6.01e-14	26.1568	FBgn0028343	CG8465	l(1)G0222	lethal (1) G0222	32732	---	---	---	IPR002110 // Ankyrin // 11.0 /// IPR002110 // Ankyrin // 4.8E-7 /// IPR002110 // Ankyrin // 11.0 /// IPR002110 // Ankyrin // 4.8E-7
12729	153928_at	0.973495	2.59165	7.29468	3.02e-08	2.39e-07	8.45811	FBgn0032955	CG2201	CG2201	CG2201	35417	4103 // choline kinase activity // inferred from sequence or structural similarity /// 4103 // choline kinase activity // non-traceable author statement /// 4305 // ethanolamine kinase activity // non-traceable author statement /// 5515 // protein binding // inferred from physical interaction /// 16301 // kinase activity // inferred from electronic annotation /// 16740 // transferase activity // …	6644 // phospholipid metabolism // inferred from electronic annotation /// 16310 // phosphorylation // non-traceable author statement	---	IPR002573 // Choline/ethanolamine kinase // 6.9E-93 /// IPR002573 // Choline/ethanolamine kinase // 6.9E-93 /// IPR002573 // Choline/ethanolamine kinase // 6.9E-93
4620	145819_at	0.968578	1.84159	9.92061	3.32e-11	6.58e-10	15.335	FBgn0031700	CG14022	CG14022	CG14022	33763	3998 // acylphosphatase activity // inferred from sequence or structural similarity /// 3998 // acylphosphatase activity // inferred from electronic annotation /// 3998 // acylphosphatase activity // inferred from sequence similarity	---	---	IPR001792 // Acylphosphatase // 9.4E-27
4915	146114_at	0.968558	0.82869	6.44721	3.24e-07	1.85e-06	6.07384	FBgn0032170	CG4658	CG4658	CG4658	34325	---	---	---	---
7048	148247_at	0.967481	-0.736302	11.3385	1.21e-12	3.5e-11	18.6785	FBgn0035655	CG13291	CG13291	CG13291	38673	---	---	---	---
10118	151317_i_at	0.958409	2.48839	6.58862	2.17e-07	1.31e-06	6.47572	FBgn0067895	CG17469	Mitf	Mitf	3885647	30528 // transcription regulator activity // inferred from direct assay /// 30528 // transcription regulator activity // inferred from electronic annotation	1745 // compound eye morphogenesis (sensu Endopterygota) // inferred from mutant phenotype /// 45449 // regulation of transcription // inferred from direct assay /// 7275 // development // inferred from electronic annotation /// 30154 // cell differentiation // inferred from electronic annotation /// 45449 // regulation of transcription // inferred from electronic annotation	5634 // nucleus // inferred from electronic annotation	---
4801	146000_at	0.958095	0.985769	8.31613	1.92e-09	2.29e-08	11.235	FBgn0031973	CG7219	CG7219	CG7219	34091	4867 // serine-type endopeptidase inhibitor activity // inferred from sequence or structural similarity /// 4867 // serine-type endopeptidase inhibitor activity // inferred from sequence similarity	---	---	IPR000215 // Serpin // 4.2E-8 /// IPR000215 // Serpin // 6.5E-49 /// IPR000215 // Serpin // 2.9E-14
10375	151574_r_at	0.953305	2.48368	6.04576	1.02e-06	4.97e-06	4.92649	FBgn0038679	CG6040	CG6040	CG6040	42292	---	---	---	---
6486	147685_at	0.953266	0.889156	4.95691	2.35e-05	7.91e-05	1.79937	FBgn0034741	CG4269	CG4269	CG4269	37578	---	---	---	---
10285	151484_i_at	0.953266	2.17428	6.54906	2.43e-07	1.44e-06	6.36344	FBgn0014396	CG3234	tim	timeless	---	5515 // protein binding // traceable author statement	7617 // mating behavior // inferred from mutant phenotype /// 7620 // copulation // inferred from mutant phenotype /// 45187 // regulation of circadian sleep/wake cycle, sleep // inferred from mutant phenotype /// 48512 // circadian behavior // inferred from mutant phenotype /// 48511 // rhythmic process // inferred from electronic annotation /// 7622 // rhythmic behavior // traceable author stat…	5634 // nucleus // inferred from electronic annotation /// 5634 // nucleus // traceable author statement /// 5737 // cytoplasm // traceable author statement /// 5634 // nucleus // non-traceable author statement /// 5737 // cytoplasm // non-traceable author statement	IPR006906 // Timeless protein // 1.0E-126
9839	151038_at	0.952101	2.08429	5.87096	1.68e-06	7.71e-06	4.42472	FBgn0040551	CG11686	CG11686	CG11686	50024	---	---	---	---
10859	152058_at	0.951415	3.69421	5.53008	4.49e-06	1.82e-05	3.44437	FBgn0003261	CG10279	Rm62	Rm62	40739	3729 // mRNA binding // inferred from sequence or structural similarity /// 4004 // ATP-dependent RNA helicase activity // inferred from sequence or structural similarity /// 4004 // ATP-dependent RNA helicase activity // non-traceable author statement /// 5515 // protein binding // inferred from physical interaction /// 5524 // ATP binding // inferred from electronic annotation /// 8026 // ATP-d…	381 // regulation of alternative nuclear mRNA splicing, via spliceosome // inferred from mutant phenotype /// 16246 // RNA interference // inferred from mutant phenotype /// 6417 // regulation of protein biosynthesis // inferred from electronic annotation /// 6445 // regulation of translation // inferred from electronic annotation	5634 // nucleus // Unknown /// 5634 // nucleus // inferred from electronic annotation /// 5634 // nucleus // inferred from curator	IPR001650 // Helicase, C-terminal // 2.5E-36 /// IPR001410 // DEAD/DEAH box helicase // 9.0E-83 /// IPR001650 // Helicase, C-terminal // 2.5E-36 /// IPR001410 // DEAD/DEAH box helicase // 9.0E-83 /// IPR001650 // Helicase, C-terminal // 2.5E-36 /// IPR001410 // DEAD/DEAH box helicase // 9.0E-83
3322	144521_at	0.950868	3.06501	5.62819	3.38e-06	1.43e-05	3.72663	FBgn0029766	CG15784	CG15784	CG15784	31461	---	---	---	---
5952	147151_at	0.943369	4.45083	4.14572	0.000238123	0.000627795	-0.483239	FBgn0033835	---	IM10	Immune induced molecule 10	36486	---	6952 // defense response // inferred from direct assay /// 8063 // Toll signaling pathway // non-traceable author statement /// 19731 // antibacterial humoral response // inferred from direct assay /// 6955 // immune response // inferred from electronic annotation /// 45087 // innate immune response // inferred from electronic annotation	5576 // extracellular region // inferred from direct assay	---
11026	152225_at	0.943179	2.67932	7.43431	2.06e-08	1.73e-07	8.84458	FBgn0020545	CG3943	kraken	kraken	33265	17171 // serine hydrolase activity // non-traceable author statement /// 3824 // catalytic activity // inferred from electronic annotation /// 4759 // serine esterase activity // inferred from electronic annotation /// 16787 // hydrolase activity // inferred from electronic annotation	6725 // aromatic compound metabolism // inferred from electronic annotation /// 7586 // digestion // inferred from expression pattern /// 9636 // response to toxin // inferred from expression pattern /// 6805 // xenobiotic metabolism // inferred from electronic annotation /// 7275 // development // inferred from electronic annotation /// 7586 // digestion // inferred from electronic annotation //…	---	---
12361	153560_at	0.939077	5.7645	10.4612	9.12e-12	2.12e-10	16.6404	FBgn0052672	CG32672	Atg8a	Autophagy-specific gene 8a	32001	5200 // structural constituent of cytoskeleton // inferred from electronic annotation /// 8017 // microtubule binding // inferred from electronic annotation /// 5515 // protein binding // inferred from physical interaction	7010 // cytoskeleton organization and biogenesis // inferred from electronic annotation	---	IPR004241 // Light chain 3 (LC3) // 5.1E-81
5998	147197_at	0.935999	0.945784	8.47595	1.26e-09	1.59e-08	11.6582	FBgn0033928	CG13941	CG13941	CG13941	36597	---	---	---	IPR005162 // Retrotransposon gag protein // 1.5E-6
2909	144108_at	0.935828	0.18202	4.51729	8.3e-05	0.000245926	0.551881	FBgn0023083	CG7693	fray	frayed	44233	4674 // protein serine/threonine kinase activity // inferred from sequence or structural similarity /// 4702 // receptor signaling protein serine/threonine kinase activity // non-traceable author statement /// 4713 // protein-tyrosine kinase activity // inferred from electronic annotation /// 5524 // ATP binding // inferred from electronic annotation /// 166 // nucleotide binding // inferred from…	165 // MAPKKK cascade // inferred from electronic annotation /// 6468 // protein amino acid phosphorylation // inferred from sequence or structural similarity /// 6468 // protein amino acid phosphorylation // non-traceable author statement /// 6917 // induction of apoptosis // inferred from electronic annotation /// 7413 // axonal fasciculation // inferred from mutant phenotype /// 8065 // establ…	---	IPR000719 // Protein kinase // 1.5E-65
5855	147054_at	0.935253	-0.996511	10.5192	7.96e-12	1.88e-10	16.7782	---	---	---	---	---	---	---	---	---
11902	153101_at	0.93508	1.19407	10.5055	8.21e-12	1.94e-10	16.7458	FBgn0034648	CG15675	CG15675	CG15675	37469	---	---	---	---
13561	154760_at	0.93487	1.76254	12.9967	3.45e-14	1.63e-12	22.2695	FBgn0035589	CG4618	CG4618	CG4618	38599	---	---	---	IPR005024 // Snf7 // 1.2E-59
726	141925_i_at	0.934208	-0.657503	9.68813	5.85e-11	1.06e-09	14.7618	---	---	---	---	---	---	---	---	---
2335	143534_at	0.933657	1.25109	6.22233	6.14e-07	3.2e-06	5.43215	FBgn0004910	CG15855	Eip63F-1	Ecdysone-induced protein 63F 1	47878	5509 // calcium ion binding // inferred from direct assay /// 5509 // calcium ion binding // non-traceable author statement /// 5516 // calmodulin binding // inferred from electronic annotation /// 5515 // protein binding // inferred from physical interaction /// 5509 // calcium ion binding // inferred from electronic annotation	19722 // calcium-mediated signaling // inferred from electronic annotation /// 35071 // salivary gland cell autophagic cell death // inferred from expression pattern /// 48102 // autophagic cell death // inferred from expression pattern	5634 // nucleus // inferred from direct assay /// 5737 // cytoplasm // inferred from direct assay /// 5886 // plasma membrane // inferred from direct assay	IPR002048 // Calcium-binding EF-hand // 3.3E-7 /// IPR002048 // Calcium-binding EF-hand // 0.91 /// IPR002048 // Calcium-binding EF-hand // 8.1E-9 /// IPR002048 // Calcium-binding EF-hand // 2.4E-4
605	141804_at	0.928206	2.90781	6.70173	1.58e-07	9.9e-07	6.79614	FBgn0020767	CG10155	Spred	Sprouty-related protein with EVH-1 domain	---	5515 // protein binding // inferred from physical interaction	7275 // development // inferred from electronic annotation /// 9966 // regulation of signal transduction // inferred from electronic annotation	16020 // membrane // inferred from electronic annotation	IPR007875 // Sprouty // 1.0E-126
10866	152065_at	0.927107	3.71769	6.12724	8.06e-07	4.04e-06	5.16	FBgn0034144	CG5089	CG5089	CG5089	36859	---	---	---	---
6888	148087_at	0.927008	0.182934	8.94968	3.72e-10	5.39e-09	12.8939	FBgn0035412	CG14957	CG14957	CG14957	38386	5515 // protein binding // inferred from physical interaction /// 8061 // chitin binding // inferred from electronic annotation	6030 // chitin metabolism // inferred from electronic annotation	5576 // extracellular region // inferred from electronic annotation	IPR002557 // Chitin binding Peritrophin-A // 1.7E-5
12474	153673_at	0.919483	2.6869	9.04429	2.92e-10	4.39e-09	13.1372	FBgn0000083	CG5730	AnnIX	Annexin IX	42492	3779 // actin binding // inferred from sequence or structural similarity /// 5509 // calcium ion binding // inferred from sequence or structural similarity /// 5509 // calcium ion binding // non-traceable author statement /// 5543 // phospholipid binding // non-traceable author statement /// 5544 // calcium-dependent phospholipid binding // inferred from sequence or structural similarity /// 5515…	6629 // lipid metabolism // inferred from electronic annotation /// 50819 // negative regulation of coagulation // inferred from electronic annotation	---	IPR001464 // Annexin // 2.3E-30 /// IPR001464 // Annexin // 1.9E-29 /// IPR001464 // Annexin // 2.1E-26 /// IPR001464 // Annexin // 2.1E-27 /// IPR001464 // Annexin // 2.4E-32 /// IPR001464 // Annexin // 9.5E-24
11107	152306_at	0.918906	2.92037	10.7487	4.66e-12	1.17e-10	17.3193	FBgn0052626	CG32626	CG32626	CG32626	32352	3876 // AMP deaminase activity // inferred from sequence or structural similarity /// 19239 // deaminase activity // inferred from electronic annotation /// 3876 // AMP deaminase activity // inferred from electronic annotation /// 3876 // AMP deaminase activity // inferred from sequence similarity	6144 // purine base metabolism // inferred from electronic annotation /// 9168 // purine ribonucleoside monophosphate biosynthesis // inferred from electronic annotation	---	IPR001365 // Adenosine/AMP deaminase // 1.0E-126 /// IPR001365 // Adenosine/AMP deaminase // 1.0E-126 /// IPR001365 // Adenosine/AMP deaminase // 1.0E-126 /// IPR001365 // Adenosine/AMP deaminase // 1.0E-126
12926	154125_at	0.916332	1.11515	3.90541	0.000466358	0.00114767	-1.13903	FBgn0041094	CG7590	scyl	scylla	39270	---	45926 // negative regulation of growth // inferred from genetic interaction	---	---
7535	148734_at	0.915017	-0.956599	11.049	2.33e-12	6.3e-11	18.0168	---	---	---	---	---	---	---	---	---
4603	145802_at	0.914477	0.64282	4.4663	9.6e-05	0.000279841	0.408582	FBgn0031665	CG3805	CG3805	CG3805	33720	---	---	---	---
10012	151211_at	0.910756	5.93469	4.167	0.000224263	0.000595685	-0.424567	FBgn0040736 /// FBgn0031035	CG16844	IM3 /// RpS10b	Immune induced molecule 3 /// Ribosomal protein S10b	32953 /// 50209	3676 // nucleic acid binding // inferred from electronic annotation /// 3735 // structural constituent of ribosome // inferred from sequence or structural similarity /// 3779 // actin binding // inferred from electronic annotation /// 5200 // structural constituent of cytoskeleton // inferred from electronic annotation /// 8017 // microtubule binding // inferred from electronic annotation /// 192…	6412 // protein biosynthesis // inferred from electronic annotation /// 7010 // cytoskeleton organization and biogenesis // inferred from electronic annotation /// 6952 // defense response // inferred from direct assay /// 8063 // Toll signaling pathway // non-traceable author statement /// 19731 // antibacterial humoral response // inferred from direct assay	5843 // cytosolic small ribosomal subunit (sensu Eukaryota) // inferred from sequence or structural similarity /// 5576 // extracellular region // inferred from direct assay /// 30529 // ribonucleoprotein complex // inferred from electronic annotation /// 5843 // cytosolic small ribosomal subunit (sensu Eukaryota) // inferred from sequence similarity	IPR005326 // Plectin/S10, N-terminal // 2.1E-77
11169	152368_at	0.906263	3.31013	10.1158	2.07e-11	4.32e-10	15.8108	FBgn0038465	CG8913	CG8913	CG8913	42049	4601 // peroxidase activity // inferred from sequence or structural similarity /// 4601 // peroxidase activity // inferred from electronic annotation /// 5506 // iron ion binding // inferred from electronic annotation /// 16491 // oxidoreductase activity // inferred from electronic annotation /// 46872 // metal ion binding // inferred from electronic annotation /// 4601 // peroxidase activity // …	6800 // oxygen and reactive oxygen species metabolism // inferred from electronic annotation /// 6952 // defense response // inferred from electronic annotation	---	IPR002007 // Animal haem peroxidase // 1.1E-41 /// IPR002007 // Animal haem peroxidase // 7.5E-30
10773	151972_at	0.903966	3.10148	9.40794	1.17e-10	1.95e-09	14.0615	FBgn0030679	CG8206	CG8206	CG8206	32516	5515 // protein binding // inferred from physical interaction	---	---	IPR007853 // DNL zinc finger // 9.8E-41
4936	146135_at	0.900932	3.03095	10.8665	3.55e-12	9.17e-11	17.5941	FBgn0032208	CG5604	CG5604	CG5604	34378	4842 // ubiquitin-protein ligase activity // inferred from electronic annotation /// 16874 // ligase activity // inferred from electronic annotation /// 5488 // binding // inferred from electronic annotation	6464 // protein modification // inferred from electronic annotation /// 6508 // proteolysis // inferred from electronic annotation /// 6512 // ubiquitin cycle // inferred from electronic annotation /// 19538 // protein metabolism // inferred from electronic annotation	5838 // proteasome regulatory particle (sensu Eukaryota) // inferred from sequence or structural similarity /// 5622 // intracellular // inferred from electronic annotation /// 5838 // proteasome regulatory particle (sensu Eukaryota) // inferred from sequence similarity	IPR002110 // Ankyrin // 8.1E-5 /// IPR002110 // Ankyrin // 3.2E-5 /// IPR002110 // Ankyrin // 34.0 /// IPR000569 // HECT domain (Ubiquitin-protein ligase) // 1.6E-6 /// IPR000569 // HECT domain (Ubiquitin-protein ligase) // 1.8E-39 /// IPR010606 // Mib_herc2 // 6.6E-32
4778	145977_at	0.899003	0.994265	6.13269	7.94e-07	3.99e-06	5.17562	FBgn0031939 /// FBgn0051904	CG13796 /// CG31904	CG13796 /// CG31904	CG13796 /// CG31904	319016 /// 34051	3700 // transcription factor activity // inferred from electronic annotation /// 5328 // neurotransmitter:sodium symporter activity // inferred from electronic annotation /// 15187 // glycine transporter activity // inferred from sequence or structural similarity /// 15293 // symporter activity // inferred from electronic annotation /// 15187 // glycine transporter activity // inferred from seque…	6355 // regulation of transcription, DNA-dependent // inferred from electronic annotation /// 6520 // amino acid metabolism // inferred from electronic annotation /// 6811 // ion transport // inferred from electronic annotation /// 6836 // neurotransmitter transport // inferred from electronic annotation /// 6858 // extracellular transport // inferred from electronic annotation /// 6865 // amino …	5622 // intracellular // inferred from electronic annotation /// 5887 // integral to plasma membrane // inferred from electronic annotation /// 16020 // membrane // inferred from electronic annotation /// 16021 // integral to membrane // inferred from electronic annotation	IPR000175 // Sodium:neurotransmitter symporter // 2.0E-8
8352	149551_at	0.898307	2.31406	4.74263	4.35e-05	0.000137331	1.18896	FBgn0053936	CG33936	CG33936	CG33936	41114	3677 // DNA binding // inferred from electronic annotation /// 8270 // zinc ion binding // inferred from electronic annotation	---	---	---
13992	AFFX-LysX-5_at	0.897492	-0.355427	10.8388	3.78e-12	9.74e-11	17.5296	---	---	---	---	---	3824 // catalytic activity // inferred from electronic annotation /// 8836 // diaminopimelate decarboxylase activity // inferred from electronic annotation /// 16829 // lyase activity // inferred from electronic annotation /// 16831 // carboxy-lyase activity // inferred from electronic annotation	8652 // amino acid biosynthesis // inferred from electronic annotation /// 9085 // lysine biosynthesis // inferred from electronic annotation /// 9089 // lysine biosynthesis via diaminopimelate // inferred from electronic annotation	---	---
12520	153719_at	0.894063	2.12442	6.91911	8.57e-08	5.88e-07	7.40908	FBgn0030505	CG11172	NFAT	NFAT	32321	3700 // transcription factor activity // inferred from sequence or structural similarity /// 3702 // RNA polymerase II transcription factor activity // inferred from sequence or structural similarity /// 3700 // transcription factor activity // inferred from electronic annotation /// 3700 // transcription factor activity // inferred from sequence similarity /// 3702 // RNA polymerase II transcrip…	6350 // transcription // inferred from sequence or structural similarity /// 6355 // regulation of transcription, DNA-dependent // inferred from electronic annotation /// 6968 // cellular defense response // inferred from electronic annotation /// 7498 // mesoderm development // inferred from electronic annotation /// 19221 // cytokine and chemokine mediated signaling pathway // inferred from ele…	5634 // nucleus // inferred from sequence or structural similarity /// 5654 // nucleoplasm // inferred from electronic annotation /// 5634 // nucleus // inferred from electronic annotation /// 5634 // nucleus // inferred from sequence similarity	IPR000451 // NF-kappa-B/Rel/dorsal // 7.2E-71 /// IPR002909 // Cell surface receptor IPT/TIG // 7.2E-15
8478	149677_s_at	0.893197	4.51797	7.84888	6.67e-09	6.62e-08	9.9796	FBgn0037889 /// FBgn0037888 /// FBgn0037879	CG5106 /// CG17210 /// CG5207	scpr-A /// scpr-B /// scpr-C	SCP-containing protein A /// SCP-containing protein B /// SCP-containing protein C	41348 /// 41357 /// 41358	5515 // protein binding // inferred from physical interaction /// 3676 // nucleic acid binding // inferred from electronic annotation /// 8270 // zinc ion binding // inferred from electronic annotation /// 46872 // metal ion binding // inferred from electronic annotation /// 5515 // protein binding // inferred from electronic annotation	6512 // ubiquitin cycle // inferred from electronic annotation	5576 // extracellular region // inferred from electronic annotation /// 5634 // nucleus // inferred from electronic annotation	IPR001283 // Allergen V5/Tpx-1 related // 7.2E-28 /// IPR001283 // Allergen V5/Tpx-1 related // 1.3E-27 /// IPR001283 // Allergen V5/Tpx-1 related // 1.3E-27
9937	151136_r_at	0.892788	-0.919249	9.36602	1.3e-10	2.13e-09	13.9558	---	---	---	---	---	---	---	---	---
12532	153731_at	0.892306	2.44948	4.75394	4.21e-05	0.000133327	1.2211	FBgn0001225	CG4183	Hsp26	Heat shock protein 26	39075	---	6457 // protein folding // inferred from electronic annotation /// 6952 // defense response // inferred from electronic annotation /// 8340 // determination of adult life span // inferred from mutant phenotype /// 9408 // response to heat // inferred from sequence or structural similarity /// 9408 // response to heat // non-traceable author statement /// 6986 // response to unfolded protein // in…	---	IPR002068 // Heat shock protein Hsp20 // 6.6E-47
10213	151412_r_at	0.890283	1.88205	5.53637	4.41e-06	1.79e-05	3.46245	---	---	---	---	---	---	---	---	---
10528	151727_s_at	0.883017	2.03081	7.17071	4.26e-08	3.23e-07	8.11335	FBgn0000567	CG32180	Eip74EF	Ecdysone-induced protein 74EF	39962	3700 // transcription factor activity // traceable author statement /// 3704 // specific RNA polymerase II transcription factor activity // inferred from sequence or structural similarity /// 3677 // DNA binding // inferred from electronic annotation /// 3700 // transcription factor activity // inferred from electronic annotation /// 43565 // sequence-specific DNA binding // inferred from electro…	6355 // regulation of transcription, DNA-dependent // inferred from sequence or structural similarity /// 6357 // regulation of transcription from RNA polymerase II promoter // inferred from electronic annotation /// 6914 // autophagy // inferred from mutant phenotype /// 7498 // mesoderm development // inferred from electronic annotation /// 8219 // cell death // traceable author statement /// 9…	5634 // nucleus // inferred from sequence or structural similarity /// 5634 // nucleus // non-traceable author statement /// 5634 // nucleus // inferred from electronic annotation /// 5634 // nucleus // inferred from sequence similarity	IPR000418 // Ets-domain // 1.7E-56 /// IPR000418 // Ets-domain // 1.7E-56
10999	152198_at	0.881931	1.8386	12.8988	4.22e-14	1.95e-12	22.0666	FBgn0027561	CG18659	CG18659	CG18659	35929	4185 // serine carboxypeptidase activity // inferred from electronic annotation	6508 // proteolysis // inferred from electronic annotation	---	IPR005112 // dDENN domain // 9.1E-19 /// IPR001194 // DENN (AEX-3) domain // 1.5E-41 /// IPR005113 // uDENN domain // 2.5E-8
11853	153052_at	0.881291	2.64213	8.53189	1.09e-09	1.39e-08	11.8056	FBgn0039296	CG10420	CG10420	CG10420	43034	5488 // binding // inferred from electronic annotation	6605 // protein targeting // inferred from electronic annotation /// 6810 // transport // inferred from electronic annotation /// 15031 // protein transport // inferred from electronic annotation	5783 // endoplasmic reticulum // inferred from electronic annotation	---
10239	151438_at	0.881285	1.17947	7.72324	9.37e-09	8.82e-08	9.63766	FBgn0028509	CG31811	cenG1A	centaurin gamma 1A	34803	5525 // GTP binding // inferred from electronic annotation /// 8060 // ARF GTPase activator activity // inferred from sequence or structural similarity /// 8060 // ARF GTPase activator activity // non-traceable author statement /// 5515 // protein binding // inferred from physical interaction /// 166 // nucleotide binding // inferred from electronic annotation /// 5096 // GTPase activator activit…	7186 // G-protein coupled receptor protein signaling pathway // inferred from electronic annotation /// 7264 // small GTPase mediated signal transduction // non-traceable author statement /// 43087 // regulation of GTPase activity // inferred from electronic annotation /// 7264 // small GTPase mediated signal transduction // inferred from electronic annotation	5634 // nucleus // non-traceable author statement	IPR001164 // Human Rev interacting-like protein (hRIP) // 2.8E-52 /// IPR002110 // Ankyrin // 7.5E-6 /// IPR001806 // Ras GTPase superfamily // 4.2E-9 /// IPR001849 // Pleckstrin-like // 2.7E-16
91	141290_at	0.880831	3.17527	10.3232	1.26e-11	2.85e-10	16.3109	FBgn0034494	CG10444	CG10444	CG10444	37294	8324 // cation transporter activity // inferred from electronic annotation /// 8523 // sodium-dependent multivitamin transporter activity // inferred from sequence or structural similarity /// 5215 // transporter activity // inferred from electronic annotation /// 8523 // sodium-dependent multivitamin transporter activity // inferred from sequence similarity	6732 // coenzyme metabolism // inferred from electronic annotation /// 6812 // cation transport // inferred from electronic annotation /// 6858 // extracellular transport // inferred from electronic annotation /// 51189 // prosthetic group metabolism // inferred from electronic annotation /// 6810 // transport // inferred from electronic annotation /// 6811 // ion transport // inferred from elect…	16020 // membrane // inferred from electronic annotation /// 16021 // integral to membrane // inferred from electronic annotation	IPR001734 // Na+/solute symporter // 2.2E-7 /// IPR001734 // Na+/solute symporter // 7.9E-5
10295	151494_at	0.878681	3.79887	7.5777	1.39e-08	1.24e-07	9.23931	---	---	---	---	---	---	---	---	---
1387	142586_at	0.876676	2.17413	7.31022	2.89e-08	2.31e-07	8.50122	FBgn0038981	CG5346	CG5346	CG5346	42653	5506 // iron ion binding // inferred from electronic annotation /// 16491 // oxidoreductase activity // inferred from electronic annotation	---	---	IPR005123 // 2OG-Fe(II) oxygenase superfamily // 1.0E-18
2670	143869_at	0.871156	3.6546	7.88804	6.01e-09	6.03e-08	10.0858	FBgn0016076	CG14029	vri	vrille	33759	3677 // DNA binding // inferred from electronic annotation /// 3702 // RNA polymerase II transcription factor activity // non-traceable author statement /// 30528 // transcription regulator activity // traceable author statement /// 42803 // protein homodimerization activity // inferred from sequence or structural similarity /// 46982 // protein heterodimerization activity // inferred from sequen…	6351 // transcription, DNA-dependent // non-traceable author statement /// 6355 // regulation of transcription, DNA-dependent // inferred from electronic annotation /// 7275 // development // traceable author statement /// 7622 // rhythmic behavior // traceable author statement /// 7623 // circadian rhythm // inferred from direct assay /// 7623 // circadian rhythm // non-traceable author statemen…	5634 // nucleus // non-traceable author statement /// 5634 // nucleus // inferred from electronic annotation	---
9561	150760_at	0.870074	0.167147	11.0923	2.12e-12	5.77e-11	18.1164	FBgn0039564	CG5527	CG5527	CG5527	43356	4245 // neprilysin activity // inferred from electronic annotation /// 8270 // zinc ion binding // inferred from electronic annotation /// 16511 // endothelin-converting enzyme activity // inferred from sequence or structural similarity /// 8233 // peptidase activity // inferred from electronic annotation /// 8237 // metallopeptidase activity // inferred from electronic annotation /// 16787 // hy…	6508 // proteolysis // inferred from electronic annotation /// 7165 // signal transduction // inferred from electronic annotation	16020 // membrane // inferred from electronic annotation	IPR008753 // Peptidase M13 // 1.2E-7 /// IPR008753 // Peptidase M13 // 1.3E-13 /// IPR000718 // Peptidase M13, neprilysin // 1.2E-51
11231	152430_at	0.869791	2.96875	8.13349	3.12e-09	3.45e-08	10.7474	FBgn0010488	CG3845	l(2)01424	lethal (2) 01424	46020	3729 // mRNA binding // inferred from electronic annotation /// 3743 // translation initiation factor activity // inferred from sequence or structural similarity /// 3723 // RNA binding // inferred from electronic annotation /// 3743 // translation initiation factor activity // inferred from electronic annotation /// 3743 // translation initiation factor activity // inferred from sequence similar…	6413 // translational initiation // inferred from electronic annotation /// 6445 // regulation of translation // inferred from electronic annotation /// 6446 // regulation of translational initiation // inferred from electronic annotation /// 35071 // salivary gland cell autophagic cell death // inferred from expression pattern /// 48102 // autophagic cell death // inferred from expression pattern	5845 // mRNA cap complex // inferred from sequence or structural similarity /// 5845 // mRNA cap complex // inferred from sequence similarity	IPR003890 // Initiation factor eIF-4 gamma, middle // 3.3E-36 /// IPR003307 // eIF4-gamma/eIF5/eIF2-epsilon // 8.3E-26
9486	150685_at	0.868862	0.28813	9.3813	1.25e-10	2.07e-09	13.9943	FBgn0051072	CG31072	Lerp	Lerp	43223	4872 // receptor activity // inferred from sequence or structural similarity /// 5215 // transporter activity // inferred from electronic annotation /// 5515 // protein binding // inferred from physical interaction /// 4872 // receptor activity // inferred from electronic annotation /// 4872 // receptor activity // inferred from sequence similarity	6810 // transport // inferred from electronic annotation /// 6892 // post-Golgi vesicle-mediated transport // inferred from direct assay /// 7041 // lysosomal transport // inferred from direct assay	5737 // cytoplasm // Unknown /// 5764 // lysosome // inferred from electronic annotation /// 16020 // membrane // inferred from electronic annotation /// 5737 // cytoplasm // inferred from curator	---
11034	152233_at	0.868562	3.71597	9.3344	1.41e-10	2.29e-09	13.876	FBgn0027657	CG9734	glob1	globin 1	41930	5344 // oxygen transporter activity // inferred from sequence or structural similarity /// 5386 // carrier activity // inferred from electronic annotation /// 5515 // protein binding // inferred from physical interaction /// 5344 // oxygen transporter activity // inferred from electronic annotation /// 5488 // binding // inferred from electronic annotation /// 5506 // iron ion binding // inferred…	15671 // oxygen transport // inferred from electronic annotation /// 6810 // transport // inferred from electronic annotation	---	IPR000971 // Globin // 8.7E-26 /// IPR000971 // Globin // 9.3E-4
11485	152684_at	0.866899	2.78492	11.7464	4.9e-13	1.61e-11	19.5926	FBgn0032358	CG4851	CG4851	CG4851	34564	8474 // palmitoyl-(protein) hydrolase activity // inferred from electronic annotation /// 16787 // hydrolase activity // inferred from electronic annotation /// 16788 // hydrolase activity, acting on ester bonds // inferred from electronic annotation /// 3824 // catalytic activity // inferred from electronic annotation	6464 // protein modification // inferred from electronic annotation /// 6497 // protein amino acid lipidation // inferred from electronic annotation /// 19538 // protein metabolism // inferred from electronic annotation	5764 // lysosome // inferred from electronic annotation	IPR002472 // Palmitoyl protein thioesterase // 5.6E-11
3671	144870_at	0.866353	0.352013	6.01582	1.11e-06	5.37e-06	4.84062	FBgn0030294	CG11750	CG11750	CG11750	32079	5515 // protein binding // inferred from physical interaction	---	---	---
5360	146559_at	0.866275	4.53868	9.73419	5.23e-11	9.67e-10	14.8759	FBgn0032897	CG9336	CG9336	CG9336	35355	---	---	---	---
12786	153985_at	0.865914	3.35979	6.14302	7.7e-07	3.9e-06	5.2052	FBgn0031990	CG8552	CG8552	CG8552	34109	8970 // phospholipase A1 activity // inferred from sequence or structural similarity /// 46872 // metal ion binding // inferred from electronic annotation /// 5515 // protein binding // inferred from physical interaction /// 8970 // phospholipase A1 activity // inferred from sequence similarity	6886 // intracellular protein transport // inferred from electronic annotation /// 16192 // vesicle-mediated transport // inferred from electronic annotation	---	IPR004177 // DDHD domain // 1.6E-120 /// IPR004170 // WWE domain // 4.8E-25
12764	153963_at	0.863095	1.75649	8.51708	1.14e-09	1.44e-08	11.7666	FBgn0053229	CG33229	CG33229	CG33229	2768996	---	---	---	---
11085	152284_at	0.862879	2.82367	10.8368	3.8e-12	9.76e-11	17.5251	FBgn0034577	CG10540	CG10540	CG10540	37387	3779 // actin binding // inferred from electronic annotation /// 5200 // structural constituent of cytoskeleton // inferred from electronic annotation /// 5515 // protein binding // inferred from physical interaction	7015 // actin filament organization // inferred from mutant phenotype /// 7018 // microtubule-based movement // inferred from sequence or structural similarity /// 30036 // actin cytoskeleton organization and biogenesis // non-traceable author statement /// 51016 // barbed-end actin filament capping // inferred from sequence or structural similarity /// 51016 // barbed-end actin filament capping …	5869 // dynactin complex // inferred from sequence or structural similarity /// 5875 // microtubule associated complex // inferred from electronic annotation /// 8290 // F-actin capping protein complex // non-traceable author statement /// 8290 // F-actin capping protein complex // inferred from electronic annotation /// 5869 // dynactin complex // inferred from sequence similarity	IPR002189 // F-actin capping protein, alpha subunit // 1.0E-126
1383	142582_at	0.862421	2.89815	11.6436	6.15e-13	1.96e-11	19.3641	FBgn0004889	CG6235	tws	twins	47877	158 // protein phosphatase type 2A activity // inferred from sequence or structural similarity /// 8601 // protein phosphatase type 2A regulator activity // inferred from mutant phenotype /// 8601 // protein phosphatase type 2A regulator activity // non-traceable author statement /// 5515 // protein binding // inferred from physical interaction /// 8601 // protein phosphatase type 2A regulator ac…	90 // mitotic anaphase // inferred from mutant phenotype /// 165 // MAPKKK cascade // inferred from electronic annotation /// 1700 // embryonic development (sensu Insecta) // inferred from mutant phenotype /// 6470 // protein amino acid dephosphorylation // inferred from sequence or structural similarity /// 6470 // protein amino acid dephosphorylation // non-traceable author statement /// 6950 /…	159 // protein phosphatase type 2A complex // inferred from sequence or structural similarity /// 159 // protein phosphatase type 2A complex // non-traceable author statement /// 5737 // cytoplasm // inferred from direct assay /// 159 // protein phosphatase type 2A complex // inferred from direct assay /// 159 // protein phosphatase type 2A complex // inferred from electronic annotation /// 159 /…	IPR001680 // G-protein beta WD-40 repeat // 0.02 /// IPR001680 // G-protein beta WD-40 repeat // 0.21 /// IPR001680 // G-protein beta WD-40 repeat // 0.034 /// IPR001680 // G-protein beta WD-40 repeat // 0.85 /// IPR001680 // G-protein beta WD-40 repeat // 0.02 /// IPR001680 // G-protein beta WD-40 repeat // 0.21 /// IPR001680 // G-protein beta WD-40 repeat // 0.034 /// IPR001680 // G-protein bet…
2213	143412_at	0.860999	1.93473	9.9052	3.44e-11	6.77e-10	15.2972	FBgn0004002	CG15288	wb	wing blister	43946	3779 // actin binding // inferred from electronic annotation /// 5102 // receptor binding // inferred from electronic annotation /// 5198 // structural molecule activity // inferred from electronic annotation /// 5488 // binding // traceable author statement /// 5515 // protein binding // inferred from electronic annotation	7160 // cell-matrix adhesion // inferred from electronic annotation /// 7165 // signal transduction // inferred from electronic annotation /// 7267 // cell-cell signaling // non-traceable author statement /// 16337 // cell-cell adhesion // inferred from electronic annotation /// 30155 // regulation of cell adhesion // inferred from electronic annotation /// 30334 // regulation of cell migration /…	5604 // basement membrane // inferred from sequence or structural similarity /// 5605 // basal lamina // inferred from direct assay /// 5605 // basal lamina // inferred from sequence or structural similarity /// 5605 // basal lamina // non-traceable author statement /// 5606 // laminin-1 // inferred from electronic annotation /// 5578 // extracellular matrix (sensu Metazoa) // inferred from elect…	IPR008211 // Laminin, N-terminal // 8.6E-52 /// IPR002049 // Laminin-type EGF-like domain // 2.5E-21 /// IPR000034 // Laminin B // 1.6E-4 /// IPR000034 // Laminin B // 1.9E-5 /// IPR000034 // Laminin B // 1.4E-6 /// IPR010307 // Laminin II // 5.9E-56 /// IPR001791 // Laminin G // 8.0E-15 /// IPR001791 // Laminin G // 6.4E-12 /// IPR001791 // Laminin G // 6.7E-19 /// IPR001791 // Laminin G // 5.4E…
11557	152756_at	0.860475	4.08556	5.22173	1.09e-05	4.01e-05	2.55796	FBgn0000120 /// FBgn0068531	CG5711	Arr1 /// DyakArr1	Arrestin 1 /// Arr1	35078	16030 // metarhodopsin binding // inferred from sequence or structural similarity /// 16030 // metarhodopsin binding // traceable author statement /// 5515 // protein binding // inferred from physical interaction /// 16030 // metarhodopsin binding // inferred from sequence similarity	6886 // intracellular protein transport // inferred from electronic annotation /// 6897 // endocytosis // inferred from electronic annotation /// 7186 // G-protein coupled receptor protein signaling pathway // inferred from electronic annotation /// 7602 // phototransduction // non-traceable author statement /// 16059 // deactivation of rhodopsin mediated signaling // inferred from genetic intera…	5624 // membrane fraction // inferred from direct assay /// 16028 // rhabdomere // inferred from direct assay	IPR000698 // Arrestin // 9.1E-60 /// IPR000698 // Arrestin // 6.7E-31
3562	144761_at	0.86046	3.53348	5.6836	2.88e-06	1.24e-05	3.88604	FBgn0001186	CG3001	Hex-A	Hexokinase A	45875	4396 // hexokinase activity // inferred from direct assay /// 5524 // ATP binding // inferred from electronic annotation /// 5515 // protein binding // inferred from physical interaction /// 166 // nucleotide binding // inferred from electronic annotation /// 4396 // hexokinase activity // inferred from electronic annotation /// 16301 // kinase activity // inferred from electronic annotation /// …	6096 // glycolysis // inferred from electronic annotation	---	IPR001312 // Hexokinase // 4.2E-104 /// IPR001312 // Hexokinase // 7.4E-107 /// IPR001312 // Hexokinase // 4.5E-107 /// IPR001312 // Hexokinase // 7.4E-107
3557	144756_at	0.860096	-0.507652	10.2351	1.56e-11	3.41e-10	16.0993	FBgn0030131	CG12654	CG12654	CG12654	31892	5041 // low-density lipoprotein receptor activity // inferred from sequence or structural similarity /// 5041 // low-density lipoprotein receptor activity // inferred from sequence similarity	---	---	IPR002172 // Low density lipoprotein-receptor, class A // 8.0E-14 /// IPR002172 // Low density lipoprotein-receptor, class A // 3.8E-10
3525	144724_at	0.860061	2.73626	9.31945	1.46e-10	2.37e-09	13.8382	FBgn0030079	CG7267	CG7267	CG7267	31831	---	---	---	---
1502	142701_at	0.859806	0.248363	11.7042	5.38e-13	1.74e-11	19.499	FBgn0030006	CG17982	CG17982	CG17982	31739	---	---	---	---
6463	147662_at	0.858137	1.17779	8.8067	5.36e-10	7.36e-09	12.524	FBgn0034706	CG11275	CG11275	CG11275	37534	5515 // protein binding // inferred from electronic annotation /// 5515 // protein binding // inferred from physical interaction	---	---	IPR000210 // BTB/POZ domain // 1.2E-17
312	141511_at	0.857215	2.88622	7.96313	4.91e-09	5.07e-08	10.289	FBgn0016794	CG1044	dos	daughter of sevenless	38321	5070 // SH3/SH2 adaptor activity // inferred from sequence or structural similarity /// 42169 // SH2 domain binding // inferred from physical interaction /// 5070 // SH3/SH2 adaptor activity // inferred from sequence similarity	8293 // torso signaling pathway // non-traceable author statement /// 8595 // determination of anterior/posterior axis, embryo // traceable author statement /// 45500 // sevenless signaling pathway // traceable author statement	5886 // plasma membrane // inferred from sequence or structural similarity /// 5886 // plasma membrane // inferred from sequence similarity	IPR001849 // Pleckstrin-like // 3.9E-29 /// IPR001849 // Pleckstrin-like // 1.4E-10
5362	146561_at	0.857103	2.13922	10.2068	1.67e-11	3.61e-10	16.0308	FBgn0032900	CG14401	CG14401	CG14401	35358	---	---	---	---
5634	146833_at	0.856257	2.00863	5.33816	7.81e-06	2.98e-05	2.89242	FBgn0040777	CG14767	CG14767	CG14767	50250	15205 // nucleobase transporter activity // inferred from sequence or structural similarity /// 15205 // nucleobase transporter activity // inferred from sequence similarity	---	5765 // lysosomal membrane // inferred from sequence or structural similarity /// 16021 // integral to membrane // inferred from sequence or structural similarity /// 16021 // integral to membrane // inferred from electronic annotation /// 5765 // lysosomal membrane // inferred from sequence similarity /// 16021 // integral to membrane // inferred from sequence similarity	IPR004687 // Golgi 4-transmembrane spanning transporter // 8.8E-21 /// IPR004687 // Golgi 4-transmembrane spanning transporter // 8.8E-21
1532	142731_at	0.855996	1.64712	7.00755	6.7e-08	4.75e-07	7.65731	FBgn0004882	CG10868	orb	oo18 RNA-binding protein	42752	3729 // mRNA binding // inferred from sequence or structural similarity /// 3729 // mRNA binding // traceable author statement /// 5515 // protein binding // inferred from physical interaction /// 8143 // poly(A) binding // inferred from electronic annotation /// 17131 // uridine-rich cytoplasmic polyadenylylation element binding // inferred from sequence or structural similarity /// 166 // nucle…	578 // embryonic axis specification // traceable author statement /// 6378 // mRNA polyadenylylation // inferred from mutant phenotype /// 6378 // mRNA polyadenylylation // inferred from sequence or structural similarity /// 7281 // germ cell development // inferred from mutant phenotype /// 7281 // germ cell development // traceable author statement /// 7294 // oocyte fate determination (sensu I…	5737 // cytoplasm // inferred from direct assay	IPR000504 // RNA-binding region RNP-1 (RNA recognition motif) // 3.3E-8 /// IPR000504 // RNA-binding region RNP-1 (RNA recognition motif) // 3.3E-8 /// IPR000504 // RNA-binding region RNP-1 (RNA recognition motif) // 3.3E-8
12917	154116_at	0.854653	0.892165	10.3599	1.16e-11	2.63e-10	16.3988	FBgn0025803	CG17299	SNF4A	SNF4/AMP-activated protein kinase gamma subunit	42515	4674 // protein serine/threonine kinase activity // non-traceable author statement /// 4679 // AMP-activated protein kinase activity // inferred from sequence or structural similarity /// 4679 // AMP-activated protein kinase activity // non-traceable author statement /// 4702 // receptor signaling protein serine/threonine kinase activity // inferred from electronic annotation /// 16301 // kinase …	6468 // protein amino acid phosphorylation // inferred from sequence or structural similarity /// 6631 // fatty acid metabolism // inferred from electronic annotation /// 6950 // response to stress // inferred from electronic annotation /// 6952 // defense response // inferred from electronic annotation /// 7242 // intracellular signaling cascade // inferred from electronic annotation /// 19220 /…	---	IPR000644 // CBS domain // 1.1E-5 /// IPR000644 // CBS domain // 1.8E-10 /// IPR000644 // CBS domain // 4.7E-9 /// IPR000644 // CBS domain // 6.0E-10 /// IPR000644 // CBS domain // 1.1E-5 /// IPR000644 // CBS domain // 1.8E-10 /// IPR000644 // CBS domain // 4.7E-9 /// IPR000644 // CBS domain // 6.0E-10 /// IPR000644 // CBS domain // 1.1E-5 /// IPR000644 // CBS domain // 1.8E-10 /// IPR000644 // C…
11056	152255_at	0.854201	2.83853	10.6983	5.23e-12	1.3e-10	17.2011	FBgn0039464	CG6330	CG6330	CG6330	43240	4850 // uridine phosphorylase activity // inferred from sequence or structural similarity /// 3824 // catalytic activity // inferred from electronic annotation /// 4850 // uridine phosphorylase activity // inferred from electronic annotation /// 4850 // uridine phosphorylase activity // inferred from sequence similarity	6206 // pyrimidine base metabolism // inferred from electronic annotation /// 9116 // nucleoside metabolism // inferred from electronic annotation /// 9166 // nucleotide catabolism // inferred from electronic annotation	5737 // cytoplasm // inferred from electronic annotation	---
6819	148018_at	0.854145	-0.0194035	5.71978	2.6e-06	1.13e-05	3.9901	FBgn0035299	CG11815	CG11815	CG11815	38263	---	---	---	---
12640	153839_at	0.852868	3.07774	7.70721	9.79e-09	9.15e-08	9.5939	FBgn0020250	CG6072	sra	sarah	47384	5102 // receptor binding // inferred from electronic annotation /// 166 // nucleotide binding // inferred from electronic annotation	7127 // meiosis I // non-traceable author statement /// 7616 // long-term memory // inferred from mutant phenotype /// 8355 // olfactory learning // inferred from mutant phenotype /// 19722 // calcium-mediated signaling // inferred from electronic annotation /// 45924 // regulation of female receptivity // inferred from mutant phenotype /// 46008 // regulation of female receptivity, post-mating /…	---	IPR006931 // Calcipressin // 1.8E-85
11962	153161_at	0.852867	2.70909	6.64571	1.85e-07	1.14e-06	6.63755	FBgn0028525	CG4249	c(2)M	crossover suppressor on 2 of Manheim	34964	---	712 // resolution of meiotic joint molecules as recombinants // inferred from mutant phenotype /// 7126 // meiosis // inferred from mutant phenotype /// 7131 // meiotic recombination // inferred from mutant phenotype	795 // synaptonemal complex // inferred from direct assay	---
6711	147910_at	0.85108	-0.165756	3.39142	0.00189169	0.00400997	-2.4919	FBgn0035106	CG7036	rno	rhinoceros	38027	3677 // DNA binding // inferred from sequence or structural similarity /// 30528 // transcription regulator activity // inferred from electronic annotation /// 5515 // protein binding // inferred from electronic annotation /// 8270 // zinc ion binding // inferred from electronic annotation /// 3677 // DNA binding // inferred from sequence similarity	6355 // regulation of transcription, DNA-dependent // inferred from sequence or structural similarity /// 6367 // transcription initiation from RNA polymerase II promoter // inferred from electronic annotation /// 42059 // negative regulation of epidermal growth factor receptor signaling pathway // inferred from direct assay /// 6355 // regulation of transcription, DNA-dependent // inferred from …	---	IPR001965 // Zn-finger-like, PHD finger // 9.4E-21
10277	151476_at	0.850277	1.51495	7.25543	3.37e-08	2.63e-07	8.34914	FBgn0032151	---	nAcR30D	nicotinic Acetylcholine Receptor 30D	34304	4889 // nicotinic acetylcholine-activated cation-selective channel activity // inferred from sequence or structural similarity /// 4889 // nicotinic acetylcholine-activated cation-selective channel activity // non-traceable author statement /// 15464 // acetylcholine receptor activity // inferred from electronic annotation /// 5515 // protein binding // inferred from physical interaction /// 4889…	6812 // cation transport // inferred from electronic annotation /// 6936 // muscle contraction // inferred from electronic annotation /// 7270 // nerve-nerve synaptic transmission // inferred from electronic annotation /// 7274 // neuromuscular synaptic transmission // inferred from electronic annotation /// 6810 // transport // inferred from electronic annotation /// 6811 // ion transport // inf…	5892 // nicotinic acetylcholine-gated receptor-channel complex // inferred from sequence or structural similarity /// 5892 // nicotinic acetylcholine-gated receptor-channel complex // non-traceable author statement /// 45211 // postsynaptic membrane // inferred from electronic annotation /// 16020 // membrane // inferred from electronic annotation /// 16021 // integral to membrane // inferred fro…	---
13122	154321_at	0.850192	5.58662	6.67493	1.7e-07	1.06e-06	6.72029	FBgn0015222	CG2216	Fer1HCH	Ferritin 1 heavy chain homologue	46415	8198 // ferrous iron binding // inferred from direct assay /// 8198 // ferrous iron binding // inferred from sequence or structural similarity /// 8198 // ferrous iron binding // non-traceable author statement /// 8199 // ferric iron binding // inferred from electronic annotation /// 5515 // protein binding // inferred from physical interaction /// 5488 // binding // inferred from electronic anno…	6826 // iron ion transport // inferred from electronic annotation /// 6879 // iron ion homeostasis // inferred from direct assay /// 6879 // iron ion homeostasis // inferred from sequence or structural similarity /// 6879 // iron ion homeostasis // non-traceable author statement /// 6879 // iron ion homeostasis // inferred from electronic annotation /// 6879 // iron ion homeostasis // inferred fr…	8043 // ferritin complex // inferred from direct assay /// 8043 // ferritin complex // inferred from sequence or structural similarity /// 8043 // ferritin complex // non-traceable author statement /// 8043 // ferritin complex // inferred from sequence similarity	IPR008331 // Ferritin and Dps // 3.0E-47 /// IPR008331 // Ferritin and Dps // 3.1E-22
6533	147732_i_at	0.849953	-0.913618	12.1475	2.05e-13	7.61e-12	20.4716	FBgn0034809	CG13542	CG13542	CG13542	37653	---	---	---	---
4956	146155_at	0.848573	1.58116	6.1238	8.14e-07	4.07e-06	5.15016	---	CG17768 /// CG33677	---	---	---	17070 // U6 snRNA binding // inferred from sequence or structural similarity	6397 // mRNA processing // inferred from electronic annotation	5634 // nucleus // inferred from electronic annotation /// 5732 // small nucleolar ribonucleoprotein complex // inferred from electronic annotation /// 30529 // ribonucleoprotein complex // inferred from electronic annotation	---
399	141598_at	0.848007	2.61662	6.83525	1.08e-07	7.23e-07	7.17309	FBgn0032731	CG10641	CG10641	CG10641	35158	5509 // calcium ion binding // inferred from sequence or structural similarity /// 5509 // calcium ion binding // non-traceable author statement /// 5509 // calcium ion binding // inferred from electronic annotation /// 5509 // calcium ion binding // inferred from sequence similarity	7498 // mesoderm development // inferred from expression pattern	---	IPR002048 // Calcium-binding EF-hand // 2.5E-5 /// IPR002048 // Calcium-binding EF-hand // 8.0E-8
1355	142554_at	0.846492	0.303654	5.88054	1.64e-06	7.53e-06	4.45225	FBgn0040395	CG3981	Unc-76	Unc-76	31179	5198 // structural molecule activity // inferred from electronic annotation /// 19894 // kinesin binding // inferred from direct assay	8088 // axon cargo transport // inferred from mutant phenotype /// 19226 // transmission of nerve impulse // inferred from electronic annotation	5874 // microtubule // inferred from electronic annotation /// 15630 // microtubule cytoskeleton // inferred from electronic annotation	---
5247	146446_at	0.844311	0.446168	6.77901	1.27e-07	8.29e-07	7.01448	FBgn0032702	CG10376	CG10376	CG10376	35126	4722 // protein serine/threonine phosphatase activity // non-traceable author statement /// 16791 // phosphoric monoester hydrolase activity // inferred from electronic annotation /// 3824 // catalytic activity // inferred from electronic annotation	165 // MAPKKK cascade // inferred from electronic annotation /// 6468 // protein amino acid phosphorylation // inferred from electronic annotation /// 6470 // protein amino acid dephosphorylation // non-traceable author statement	---	IPR001932 // Protein phosphatase 2C-like // 6.8E-63
10010	151209_at	0.843421	5.04802	4.19216	0.000208907	0.000558868	-0.355136	FBgn0040734	CG15065	CG15065	CG15065	50207	---	---	---	---
240	141439_at	0.843337	0.184122	6.88448	9.44e-08	6.42e-07	7.31169	FBgn0052302	CG32302	CG32302	CG32302	38293	8061 // chitin binding // inferred from electronic annotation	6030 // chitin metabolism // inferred from electronic annotation	5576 // extracellular region // inferred from electronic annotation	IPR002557 // Chitin binding Peritrophin-A // 4.0E-14 /// IPR002557 // Chitin binding Peritrophin-A // 6.2E-7 /// IPR002557 // Chitin binding Peritrophin-A // 4.0E-5
11261	152460_at	0.84321	2.33796	8.10153	3.39e-09	3.7e-08	10.6617	FBgn0027539	CG5807	CG5807	CG5807	42956	---	---	---	IPR006876 // LMBR1-like conserved region // 1.0E-126
10495	151694_at	0.841607	1.69857	5.21984	1.1e-05	4.03e-05	2.55253	FBgn0035142	CG17090	CG17090	CG17090	38070	4672 // protein kinase activity // non-traceable author statement /// 4674 // protein serine/threonine kinase activity // inferred from sequence or structural similarity /// 4702 // receptor signaling protein serine/threonine kinase activity // inferred from electronic annotation /// 5524 // ATP binding // inferred from electronic annotation /// 166 // nucleotide binding // inferred from electron…	6468 // protein amino acid phosphorylation // non-traceable author statement /// 6917 // induction of apoptosis // inferred from electronic annotation /// 7398 // ectoderm development // inferred from electronic annotation /// 7399 // nervous system development // inferred from electronic annotation /// 8283 // cell proliferation // inferred from electronic annotation /// 6468 // protein amino ac…	---	IPR000719 // Protein kinase // 7.7E-64
844	142043_at	0.841292	1.02615	3.16339	0.00344663	0.00683471	-3.06441	---	---	---	---	---	---	---	---	---
7861	149060_at	0.839872	1.87109	5.83743	1.85e-06	8.4e-06	4.32835	FBgn0052210	CG32210	CG32210	CG32210	40127	4842 // ubiquitin-protein ligase activity // inferred from electronic annotation /// 8270 // zinc ion binding // inferred from electronic annotation /// 5488 // binding // inferred from electronic annotation /// 5515 // protein binding // inferred from electronic annotation	16567 // protein ubiquitination // inferred from electronic annotation	151 // ubiquitin ligase complex // inferred from electronic annotation	IPR001841 // Zn-finger, RING // 3.6E-6
12466	153665_at	0.839354	3.36218	7.0255	6.37e-08	4.55e-07	7.70759	---	---	---	---	---	4672 // protein kinase activity // inferred from electronic annotation /// 4740 // [pyruvate dehydrogenase (lipoamide)] kinase activity // inferred from sequence or structural similarity /// 4740 // [pyruvate dehydrogenase (lipoamide)] kinase activity // non-traceable author statement /// 5524 // ATP binding // inferred from electronic annotation /// 16491 // oxidoreductase activity // inferred f…	6090 // pyruvate metabolism // inferred from sequence or structural similarity /// 6099 // tricarboxylic acid cycle // inferred from electronic annotation /// 6468 // protein amino acid phosphorylation // inferred from electronic annotation /// 19220 // regulation of phosphate metabolism // inferred from electronic annotation	5759 // mitochondrial matrix // inferred from sequence or structural similarity /// 5759 // mitochondrial matrix // non-traceable author statement /// 5739 // mitochondrion // inferred from electronic annotation	---
11514	152713_at	0.839219	2.30104	11.668	5.83e-13	1.86e-11	19.4186	FBgn0037697	CG9363	CG9363	CG9363	41133	4364 // glutathione transferase activity // inferred from sequence or structural similarity /// 16034 // maleylacetoacetate isomerase activity // inferred from sequence or structural similarity /// 16740 // transferase activity // inferred from electronic annotation /// 5515 // protein binding // inferred from physical interaction /// 3824 // catalytic activity // inferred from electronic annotat…	6559 // L-phenylalanine catabolism // inferred from sequence or structural similarity /// 6572 // tyrosine catabolism // inferred from sequence or structural similarity /// 6559 // L-phenylalanine catabolism // inferred from electronic annotation /// 6572 // tyrosine catabolism // inferred from electronic annotation /// 9072 // aromatic amino acid family metabolism // inferred from electronic ann…	5737 // cytoplasm // inferred from sequence or structural similarity /// 5737 // cytoplasm // inferred from electronic annotation /// 5737 // cytoplasm // inferred from sequence similarity	IPR004046 // Glutathione S-transferase, C-terminal // 2.1E-5 /// IPR004045 // Glutathione S-transferase, N-terminal // 4.4E-17 /// IPR004046 // Glutathione S-transferase, C-terminal // 2.1E-5 /// IPR004045 // Glutathione S-transferase, N-terminal // 4.4E-17 /// IPR004046 // Glutathione S-transferase, C-terminal // 2.1E-5 /// IPR004045 // Glutathione S-transferase, N-terminal // 4.4E-17
4346	145545_s_at	0.839144	2.09766	7.13777	4.66e-08	3.48e-07	8.02147	FBgn0031276 /// FBgn0040725	CG12506 /// CG13946	CG12506 /// CG13946	CG12506 /// CG13946	33249 /// 50198	---	---	---	---
11293	152492_at	0.837345	2.35672	7.07252	5.59e-08	4.09e-07	7.83919	FBgn0035937	CG5741	CG5741	CG5741	39018	---	---	---	---
2317	143516_at	0.834335	2.41351	6.56634	2.31e-07	1.38e-06	6.4125	FBgn0004839	CG8967	otk	off-track	36283	4672 // protein kinase activity // inferred from direct assay /// 4713 // protein-tyrosine kinase activity // inferred from sequence or structural similarity /// 4713 // protein-tyrosine kinase activity // non-traceable author statement /// 4714 // transmembrane receptor protein tyrosine kinase activity // inferred from sequence or structural similarity /// 4872 // receptor activity // inferred f…	6468 // protein amino acid phosphorylation // non-traceable author statement /// 6952 // defense response // inferred from electronic annotation /// 7155 // cell adhesion // inferred from direct assay /// 7155 // cell adhesion // inferred from sequence or structural similarity /// 7169 // transmembrane receptor protein tyrosine kinase signaling pathway // inferred from electronic annotation /// 7…	5886 // plasma membrane // inferred from direct assay	IPR000719 // Protein kinase // 0.16 /// IPR000719 // Protein kinase // 3.0E-51 /// IPR007110 // Immunoglobulin-like // 2.8E-4 /// IPR007110 // Immunoglobulin-like // 1.1E-6 /// IPR007110 // Immunoglobulin-like // 0.0037 /// IPR007110 // Immunoglobulin-like // 4.5E-5 /// IPR007110 // Immunoglobulin-like // 4.9E-7 /// IPR007110 // Immunoglobulin-like // 0.0034
3854	145053_at	0.830951	1.12133	9.2352	1.8e-10	2.86e-09	13.6246	FBgn0040153	CG32597	l(1)G0469	lethal (1) G0469	32371	---	---	---	---
284	141483_at	0.82947	3.26242	5.33162	7.96e-06	3.03e-05	2.87363	FBgn0038661	CG17836	CG17836	CG17836	42267	3677 // DNA binding // inferred from electronic annotation /// 46983 // protein dimerization activity // inferred from sequence or structural similarity /// 46983 // protein dimerization activity // inferred from sequence similarity	6355 // regulation of transcription, DNA-dependent // inferred from electronic annotation /// 50875 // cellular physiological process // inferred from mutant phenotype	5634 // nucleus // inferred from electronic annotation	---
657	141856_at	0.826576	1.81307	4.30345	0.000152486	0.000419459	-0.0465545	---	---	---	---	---	---	---	---	---
368	141567_at	0.826438	1.69009	9.61622	6.98e-11	1.25e-09	14.5831	FBgn0028894	CG5869	CG5869	CG5869	34963	3779 // actin binding // inferred from sequence or structural similarity /// 5200 // structural constituent of cytoskeleton // inferred from electronic annotation /// 5515 // protein binding // inferred from physical interaction /// 3779 // actin binding // inferred from electronic annotation /// 8083 // growth factor activity // inferred from electronic annotation /// 3779 // actin binding // in…	7398 // ectoderm development // inferred from electronic annotation /// 42063 // gliogenesis // inferred from sequence or structural similarity /// 42063 // gliogenesis // inferred from sequence similarity	5622 // intracellular // inferred from electronic annotation	IPR002108 // Actin-binding, cofilin/tropomyosin type // 6.3E-19
8046	149245_at	0.825888	-0.315447	10.4248	9.93e-12	2.29e-10	16.5538	FBgn0037178	CG12546	CG12546	CG12546	40483	---	---	---	---
10263	151462_at	0.825553	-0.290465	9.37553	1.27e-10	2.09e-09	13.9798	---	---	---	---	---	---	---	---	---
8652	149851_at	0.824406	-0.854061	10.5043	8.24e-12	1.94e-10	16.7429	FBgn0038162	CG14368	CG14368	CG14368	41664	---	---	---	---
407	141606_at	0.8238	1.369	9.71244	5.51e-11	1.01e-09	14.8221	FBgn0028736	CG1333	Ero1L	Ero1L	38500	16491 // oxidoreductase activity // inferred from electronic annotation /// 16491 // oxidoreductase activity // inferred from sequence or structural similarity /// 16491 // oxidoreductase activity // inferred from sequence similarity	6457 // protein folding // inferred from electronic annotation /// 6886 // intracellular protein transport // inferred from electronic annotation /// 16192 // vesicle-mediated transport // inferred from electronic annotation /// 19538 // protein metabolism // inferred from electronic annotation /// 51085 // chaperone cofactor dependent protein folding // inferred from sequence or structural simil…	5783 // endoplasmic reticulum // inferred from sequence or structural similarity /// 5783 // endoplasmic reticulum // inferred from electronic annotation /// 16020 // membrane // inferred from electronic annotation /// 5783 // endoplasmic reticulum // inferred from sequence similarity	IPR007266 // Endoplasmic reticulum oxidoreductin 1 // 1.0E-126
2444	143643_at	0.822686	1.908	4.30077	0.000153648	0.000422164	-0.0540077	FBgn0011274	CG6794	Dif	Dorsal-related immunity factor	35045	3677 // DNA binding // inferred from direct assay /// 3700 // transcription factor activity // inferred from direct assay /// 3700 // transcription factor activity // non-traceable author statement /// 5515 // protein binding // inferred from physical interaction /// 3677 // DNA binding // inferred from electronic annotation /// 3700 // transcription factor activity // inferred from electronic an…	6357 // regulation of transcription from RNA polymerase II promoter // inferred from electronic annotation /// 6916 // anti-apoptosis // inferred from electronic annotation /// 6952 // defense response // non-traceable author statement /// 6952 // defense response // traceable author statement /// 6955 // immune response // non-traceable author statement /// 6955 // immune response // traceable a…	5634 // nucleus // inferred from direct assay /// 5634 // nucleus // non-traceable author statement /// 5634 // nucleus // traceable author statement /// 5737 // cytoplasm // inferred from direct assay /// 5737 // cytoplasm // non-traceable author statement /// 5737 // cytoplasm // traceable author statement /// 5634 // nucleus // inferred from electronic annotation	IPR000451 // NF-kappa-B/Rel/dorsal // 8.5E-98 /// IPR002909 // Cell surface receptor IPT/TIG // 1.5E-14
13161	154360_at	0.822455	0.326669	16.0739	1.01e-16	1.14e-14	28.1314	FBgn0029824	CG3726	CG3726	CG3726	31525	3677 // DNA binding // non-traceable author statement /// 3700 // transcription factor activity // inferred from electronic annotation /// 5515 // protein binding // inferred from electronic annotation /// 30528 // transcription regulator activity // inferred from electronic annotation /// 3677 // DNA binding // inferred from electronic annotation	6357 // regulation of transcription from RNA polymerase II promoter // inferred from electronic annotation /// 7530 // sex determination // inferred from electronic annotation /// 19226 // transmission of nerve impulse // inferred from electronic annotation /// 6355 // regulation of transcription, DNA-dependent // inferred from electronic annotation	5634 // nucleus // inferred from electronic annotation	IPR000210 // BTB/POZ domain // 7.3E-27 /// IPR007889 // Helix-turn-helix, Psq // 3.5E-9
3071	144270_at	0.822201	2.05897	6.46233	3.1e-07	1.78e-06	6.11688	FBgn0028859	CG12455	CG12455	CG12455	34951	5245 // voltage-gated calcium channel activity // inferred from sequence or structural similarity /// 5262 // calcium channel activity // inferred from sequence or structural similarity /// 5245 // voltage-gated calcium channel activity // inferred from sequence similarity /// 5262 // calcium channel activity // inferred from sequence similarity	6812 // cation transport // inferred from electronic annotation /// 6936 // muscle contraction // inferred from electronic annotation	16020 // membrane // inferred from electronic annotation	IPR002035 // von Willebrand factor, type A // 1.9E-10 /// IPR004010 // Cache domain // 9.7E-39
9765	150964_at	0.821992	1.23327	5.94618	1.35e-06	6.37e-06	4.64077	FBgn0040206	CG1487	krz	kurtz	53554	5515 // protein binding // inferred from physical interaction	6886 // intracellular protein transport // inferred from electronic annotation /// 6897 // endocytosis // inferred from electronic annotation /// 7165 // signal transduction // inferred from electronic annotation /// 7166 // cell surface receptor linked signal transduction // inferred from electronic annotation /// 7186 // G-protein coupled receptor protein signaling pathway // inferred from elec…	---	IPR000698 // Arrestin // 2.3E-66 /// IPR000698 // Arrestin // 2.2E-53
13788	154987_at	0.821922	1.43429	10.0322	2.53e-11	5.2e-10	15.6077	FBgn0033538	CG11883	CG11883	CG11883	36121	8081 // phosphoric diester hydrolase activity // inferred from electronic annotation /// 8236 // serine-type peptidase activity // inferred from electronic annotation /// 8253 // 5'-nucleotidase activity // inferred from sequence or structural similarity /// 19204 // nucleotide phosphatase activity // inferred from electronic annotation /// 166 // nucleotide binding // inferred from electronic an…	6139 // nucleobase, nucleoside, nucleotide and nucleic acid metabolism // inferred from electronic annotation /// 6508 // proteolysis // inferred from electronic annotation /// 9166 // nucleotide catabolism // inferred from electronic annotation	16020 // membrane // inferred from electronic annotation	IPR004843 // Metallo-phosphoesterase // 1.1E-16 /// IPR008334 // 5-Nucleotidase, C-terminal // 1.1E-56
8669	149868_at	0.82153	2.15676	5.03536	1.87e-05	6.49e-05	2.0237	FBgn0038195	CG3061	CG3061	CG3061	41707	51082 // unfolded protein binding // inferred from electronic annotation /// 31072 // heat shock protein binding // inferred from electronic annotation	6457 // protein folding // inferred from electronic annotation /// 6950 // response to stress // inferred from electronic annotation /// 6952 // defense response // inferred from electronic annotation /// 19538 // protein metabolism // inferred from electronic annotation /// 6605 // protein targeting // inferred from electronic annotation /// 6810 // transport // inferred from electronic annotati…	16020 // membrane // inferred from electronic annotation /// 16021 // integral to membrane // inferred from electronic annotation	IPR001623 // Heat shock protein DnaJ, N-terminal // 4.2E-35
4306	145505_i_at	0.819429	0.4972	8.34049	1.8e-09	2.17e-08	11.2997	---	---	---	---	---	---	---	---	---
11023	152222_at	0.818686	1.42874	13.2335	2.13e-14	1.11e-12	22.756	FBgn0027558	CG4445	pgant3	polypeptide GalNAc transferase 3	35627	4653 // polypeptide N-acetylgalactosaminyltransferase activity // inferred from direct assay /// 4653 // polypeptide N-acetylgalactosaminyltransferase activity // inferred from sequence or structural similarity /// 5515 // protein binding // inferred from physical interaction /// 4653 // polypeptide N-acetylgalactosaminyltransferase activity // inferred from electronic annotation /// 5509 // calc…	5976 // polysaccharide metabolism // inferred from electronic annotation /// 6486 // protein amino acid glycosylation // inferred from electronic annotation /// 9312 // oligosaccharide biosynthesis // inferred from direct assay	5795 // Golgi stack // non-traceable author statement /// 5795 // Golgi stack // inferred from electronic annotation /// 16020 // membrane // inferred from electronic annotation /// 16021 // integral to membrane // inferred from electronic annotation	IPR001173 // Glycosyl transferase, family 2 // 1.1E-35
13717	154916_at	0.816369	1.57993	12.3577	1.31e-13	5.16e-12	20.9246	FBgn0034431	CG7417	Tab2	Tab2	37216	3700 // transcription factor activity // non-traceable author statement /// 5515 // protein binding // inferred from physical interaction /// 8270 // zinc ion binding // inferred from electronic annotation	43123 // positive regulation of I-kappaB kinase/NF-kappaB cascade // non-traceable author statement /// 45449 // regulation of transcription // non-traceable author statement /// 46330 // positive regulation of JNK cascade // non-traceable author statement	5634 // nucleus // non-traceable author statement	IPR003892 // Ubiquitin system component Cue // 4.8E-10
12654	153853_at	0.816319	2.29923	6.42796	3.42e-07	1.94e-06	6.01901	FBgn0033417	CG8809	Camta	Calmodulin-binding transcription activator	35974	3677 // DNA binding // inferred from sequence or structural similarity /// 3700 // transcription factor activity // inferred from sequence or structural similarity /// 5516 // calmodulin binding // inferred from sequence or structural similarity /// 3677 // DNA binding // inferred from sequence similarity /// 3700 // transcription factor activity // inferred from sequence similarity /// 5516 // c…	45941 // positive regulation of transcription // inferred from sequence or structural similarity /// 45941 // positive regulation of transcription // inferred from sequence similarity	5634 // nucleus // inferred from sequence or structural similarity /// 5634 // nucleus // inferred from sequence similarity	IPR002110 // Ankyrin // 0.13 /// IPR002110 // Ankyrin // 0.0064 /// IPR002110 // Ankyrin // 3.3 /// IPR002909 // Cell surface receptor IPT/TIG // 9.1E-6
1932	143131_at	0.816196	2.51623	6.66127	1.77e-07	1.09e-06	6.68162	FBgn0000490	CG9885	dpp	decapentaplegic	33432	4871 // signal transducer activity // traceable author statement /// 5160 // transforming growth factor beta receptor binding // inferred from sequence or structural similarity /// 5160 // transforming growth factor beta receptor binding // non-traceable author statement /// 8083 // growth factor activity // inferred from electronic annotation /// 16015 // morphogen activity // non-traceable auth…	1708 // cell fate specification // non-traceable author statement /// 1708 // cell fate specification // traceable author statement /// 1709 // cell fate determination // traceable author statement /// 1715 // ectodermal cell fate specification // non-traceable author statement /// 1745 // compound eye morphogenesis (sensu Endopterygota) // traceable author statement /// 2168 // larval developmen…	5576 // extracellular region // non-traceable author statement /// 5615 // extracellular space // inferred from direct assay /// 5622 // intracellular // inferred from direct assay /// 5576 // extracellular region // inferred from electronic annotation	IPR001839 // Transforming growth factor beta // 4.6E-67 /// IPR001111 // Transforming growth factor beta (TGFb), N-terminal // 8.0E-74 /// IPR001839 // Transforming growth factor beta // 7.5E-65
2638	143837_at	0.814728	2.99149	7.83767	6.88e-09	6.76e-08	9.94917	FBgn0015754	CG8440	Lis-1	Lissencephaly-1	36791	5200 // structural constituent of cytoskeleton // inferred from electronic annotation /// 30234 // enzyme regulator activity // inferred from sequence or structural similarity /// 42623 // ATPase activity, coupled // inferred from sequence or structural similarity /// 45502 // dynein binding // non-traceable author statement /// 45502 // dynein binding // inferred from sequence or structural simi…	6928 // cell motility // inferred from electronic annotation /// 7018 // microtubule-based movement // inferred from sequence or structural similarity /// 7067 // mitosis // inferred from electronic annotation /// 7097 // nuclear migration // traceable author statement /// 7294 // oocyte fate determination (sensu Insecta) // inferred from mutant phenotype /// 7398 // ectoderm development // infer…	30286 // dynein complex // inferred from sequence or structural similarity /// 30424 // axon // inferred from direct assay /// 30425 // dendrite // inferred from direct assay /// 43025 // cell soma // inferred from direct assay /// 5856 // cytoskeleton // inferred from electronic annotation /// 5874 // microtubule // inferred from electronic annotation /// 30286 // dynein complex // inferred from…	IPR001680 // G-protein beta WD-40 repeat // 4.7E-8 /// IPR001680 // G-protein beta WD-40 repeat // 3.0E-11 /// IPR001680 // G-protein beta WD-40 repeat // 1.1E-13 /// IPR001680 // G-protein beta WD-40 repeat // 2.5E-8 /// IPR001680 // G-protein beta WD-40 repeat // 1.3E-17 /// IPR001680 // G-protein beta WD-40 repeat // 6.5E-16 /// IPR001680 // G-protein beta WD-40 repeat // 9.6E-12
10153	151352_at	0.814619	0.66572	3.78509	0.000650554	0.00154113	-1.46242	FBgn0052549	CG32549	CG32549	CG32549	32822	8253 // 5'-nucleotidase activity // inferred from sequence or structural similarity /// 8253 // 5'-nucleotidase activity // inferred from sequence similarity	6139 // nucleobase, nucleoside, nucleotide and nucleic acid metabolism // inferred from sequence or structural similarity /// 6144 // purine base metabolism // inferred from electronic annotation /// 6139 // nucleobase, nucleoside, nucleotide and nucleic acid metabolism // inferred from sequence similarity	5829 // cytosol // inferred from sequence or structural similarity /// 5829 // cytosol // inferred from sequence similarity	IPR008380 // Purine 5-nucleotidase // 1.0E-126
5928	147127_s_at	0.813545	4.20529	5.52539	4.55e-06	1.85e-05	3.43088	FBgn0033789 /// FBgn0033788	CG13323 /// CG13324	CG13324 /// CG13323	CG13324 /// CG13323	36433 /// 36434	---	---	---	---
11024	152223_at	0.812946	2.069	6.7813	1.26e-07	8.26e-07	7.02095	FBgn0039137	CG13604	CG13604	CG13604	42840	5515 // protein binding // inferred from physical interaction	---	---	IPR000449 // Ubiquitin-associated domain // 1.3E-9 /// IPR001345 // Phosphoglycerate/bisphosphoglycerate mutase // 1.7E-7 /// IPR001345 // Phosphoglycerate/bisphosphoglycerate mutase // 1.7E-7
1475	142674_at	0.812419	1.89948	8.92804	3.93e-10	5.63e-09	12.8381	FBgn0032005	CG8282	Snx6	Snx6	34126	5515 // protein binding // inferred from physical interaction /// 5515 // protein binding // inferred from electronic annotation /// 35091 // phosphoinositide binding // inferred from electronic annotation	6886 // intracellular protein transport // inferred from sequence or structural similarity /// 7242 // intracellular signaling cascade // inferred from electronic annotation /// 6886 // intracellular protein transport // inferred from sequence similarity	---	IPR001683 // Phox-like // 8.5E-22
11742	152941_at	0.811875	2.43511	13.1767	2.39e-14	1.2e-12	22.64	FBgn0019972	CG7788	Ice	Ice	43514	30693 // caspase activity // inferred from sequence or structural similarity /// 30693 // caspase activity // non-traceable author statement /// 30693 // caspase activity // traceable author statement /// 5515 // protein binding // inferred from physical interaction /// 8233 // peptidase activity // inferred from electronic annotation /// 8234 // cysteine-type peptidase activity // inferred from …	6508 // proteolysis // inferred from electronic annotation /// 6508 // proteolysis // traceable author statement /// 6915 // apoptosis // non-traceable author statement /// 6915 // apoptosis // traceable author statement /// 46668 // regulation of retinal programmed cell death // non-traceable author statement /// 6915 // apoptosis // inferred from electronic annotation	8303 // caspase complex // non-traceable author statement	IPR001309 // Caspase-1, p20 // 2.7E-110
6326	147525_at	0.810905	2.92419	5.15465	1.33e-05	4.76e-05	2.36548	FBgn0034480	CG16898	CG16898	CG16898	37276	16301 // kinase activity // inferred from electronic annotation /// 16740 // transferase activity // inferred from electronic annotation	---	---	IPR004119 // Protein of unknown function DUF227 // 1.8E-101
376	141575_at	0.810801	1.81704	5.47091	5.32e-06	2.12e-05	3.27416	FBgn0020647	CG5405	KrT95D	Krueppel target at 95D	42843	---	42 // protein targeting to Golgi // inferred from sequence or structural similarity /// 42 // protein targeting to Golgi // inferred from sequence similarity	---	---
2524	143723_at	0.81029	3.56594	13.0283	3.24e-14	1.55e-12	22.3348	FBgn0013771	CG10246	Cyp6a9	Cytochrome P450-6a9	36663	4497 // monooxygenase activity // inferred from electronic annotation /// 16491 // oxidoreductase activity // inferred from electronic annotation /// 5515 // protein binding // inferred from physical interaction /// 5506 // iron ion binding // inferred from electronic annotation /// 20037 // heme binding // inferred from electronic annotation /// 46872 // metal ion binding // inferred from electr…	6118 // electron transport // inferred from electronic annotation /// 8202 // steroid metabolism // inferred from electronic annotation /// 17143 // insecticide metabolism // non-traceable author statement	5792 // microsome // non-traceable author statement /// 16020 // membrane // non-traceable author statement /// 5783 // endoplasmic reticulum // inferred from electronic annotation /// 5792 // microsome // inferred from electronic annotation /// 16020 // membrane // inferred from electronic annotation	IPR001128 // Cytochrome P450 // 3.1E-113
1102	142301_s_at	0.810261	1.76513	6.51587	2.67e-07	1.56e-06	6.26912	FBgn0036172	CG11711	Mob1	Mob1	39293	---	7611 // learning and/or memory // inferred from mutant phenotype /// 8355 // olfactory learning // inferred from mutant phenotype	---	IPR005301 // Mob1/phocein family // 8.8E-109 /// IPR005301 // Mob1/phocein family // 8.8E-109 /// IPR005301 // Mob1/phocein family // 8.8E-109 /// IPR005301 // Mob1/phocein family // 8.8E-109
13500	154699_at	0.809135	2.86862	5.95266	1.33e-06	6.27e-06	4.65936	FBgn0001078	CG4059	ftz-f1	ftz transcription factor 1	40045	3677 // DNA binding // inferred from direct assay /// 3677 // DNA binding // non-traceable author statement /// 3700 // transcription factor activity // inferred from sequence or structural similarity /// 3707 // steroid hormone receptor activity // inferred from electronic annotation /// 3712 // transcription cofactor activity // non-traceable author statement /// 4879 // ligand-dependent nuclea…	2165 // larval or pupal development (sensu Insecta) // inferred from mutant phenotype /// 6355 // regulation of transcription, DNA-dependent // non-traceable author statement /// 6357 // regulation of transcription from RNA polymerase II promoter // inferred from electronic annotation /// 7165 // signal transduction // inferred from electronic annotation /// 7365 // periodic partitioning // infer…	5634 // nucleus // inferred from direct assay /// 5634 // nucleus // inferred from sequence or structural similarity /// 5634 // nucleus // non-traceable author statement /// 5737 // cytoplasm // non-traceable author statement /// 5634 // nucleus // inferred from electronic annotation /// 5634 // nucleus // inferred from sequence similarity	IPR000536 // Ligand-binding domain of nuclear hormone receptor // 1.5E-45 /// IPR001628 // Zn-finger, C4-type steroid receptor // 1.7E-53 /// IPR000536 // Ligand-binding domain of nuclear hormone receptor // 1.5E-45 /// IPR001628 // Zn-finger, C4-type steroid receptor // 1.7E-53
11123	152322_at	0.808214	3.21958	6.8763	9.66e-08	6.54e-07	7.28868	FBgn0035198	CG9130 /// CG9133	CG9133	CG9133	3772453	---	---	---	---
7339	148538_at	0.808089	1.54364	6.4981	2.8e-07	1.63e-06	6.21861	FBgn0036109	CG18349	CG18349	CG18349	39224	5515 // protein binding // inferred from physical interaction /// 42302 // structural constituent of cuticle // inferred from electronic annotation	---	---	IPR000618 // Insect cuticle protein // 1.5E-29
10732	151931_at	0.807656	4.93367	9.48214	9.73e-11	1.66e-09	14.2479	FBgn0015795	CG5915	Rab7	Rab-protein 7	42841	3924 // GTPase activity // inferred from sequence or structural similarity /// 3924 // GTPase activity // non-traceable author statement /// 5525 // GTP binding // inferred from electronic annotation /// 166 // nucleotide binding // inferred from electronic annotation /// 3924 // GTPase activity // inferred from sequence similarity	6886 // intracellular protein transport // inferred from electronic annotation /// 6898 // receptor mediated endocytosis // inferred from electronic annotation /// 7165 // signal transduction // inferred from electronic annotation /// 7264 // small GTPase mediated signal transduction // inferred from electronic annotation /// 8333 // endosome to lysosome transport // inferred from genetic interac…	5770 // late endosome // inferred from direct assay /// 16020 // membrane // inferred from electronic annotation	IPR001806 // Ras GTPase superfamily // 4.4E-87
665	141864_i_at	0.807474	3.71755	4.53494	7.89e-05	0.000235171	0.601572	---	---	---	---	---	---	---	---	---
2642	143841_at	0.807221	2.49801	7.20033	3.92e-08	3e-07	8.19587	FBgn0015773	CG18657	NetA	Netrin-A	32398	5198 // structural molecule activity // inferred from electronic annotation /// 5515 // protein binding // inferred from physical interaction	7160 // cell-matrix adhesion // inferred from electronic annotation /// 7165 // signal transduction // inferred from electronic annotation /// 7398 // ectoderm development // inferred from electronic annotation /// 7411 // axon guidance // inferred from sequence or structural similarity /// 7411 // axon guidance // non-traceable author statement /// 16337 // cell-cell adhesion // inferred from el…	5576 // extracellular region // inferred from sequence or structural similarity /// 5578 // extracellular matrix (sensu Metazoa) // inferred from sequence or structural similarity /// 5578 // extracellular matrix (sensu Metazoa) // inferred from electronic annotation /// 5576 // extracellular region // inferred from sequence similarity /// 5578 // extracellular matrix (sensu Metazoa) // inferred …	IPR008211 // Laminin, N-terminal // 6.8E-29 /// IPR001134 // Netrin, C-terminal // 8.4E-39 /// IPR002049 // Laminin-type EGF-like domain // 1.8E-18
58	141257_at	0.804057	2.62587	6.44019	3.3e-07	1.88e-06	6.05384	FBgn0001142	CG2718	Gs1	Glutamine synthetase 1	33172	4356 // glutamate-ammonia ligase activity // inferred from direct assay /// 4356 // glutamate-ammonia ligase activity // inferred from sequence or structural similarity /// 4356 // glutamate-ammonia ligase activity // non-traceable author statement /// 15930 // glutamate synthase activity // non-traceable author statement /// 4356 // glutamate-ammonia ligase activity // inferred from electronic a…	6541 // glutamine metabolism // non-traceable author statement /// 8652 // amino acid biosynthesis // inferred from electronic annotation /// 9399 // nitrogen fixation // inferred from electronic annotation /// 6542 // glutamine biosynthesis // inferred from electronic annotation /// 6807 // nitrogen compound metabolism // inferred from electronic annotation	5739 // mitochondrion // inferred from direct assay /// 5739 // mitochondrion // non-traceable author statement /// 5739 // mitochondrion // inferred from electronic annotation	IPR008147 // Glutamine synthetase, beta-Grasp domain // 4.4E-32 /// IPR008146 // Glutamine synthetase, catalytic domain // 4.9E-109
11234	152433_at	0.803485	1.69179	5.92973	1.42e-06	6.64e-06	4.59352	FBgn0026144 /// FBgn0082829 /// FBgn0082806	CG1435	CBP /// DanaCBP /// DpaiCBP	sarcoplasmic calcium-binding protein /// CBP /// CBP	31669	5509 // calcium ion binding // inferred from sequence or structural similarity /// 5515 // protein binding // inferred from physical interaction /// 5509 // calcium ion binding // inferred from electronic annotation /// 5509 // calcium ion binding // inferred from sequence similarity	---	16529 // sarcoplasmic reticulum // inferred from sequence or structural similarity /// 16529 // sarcoplasmic reticulum // inferred from sequence similarity	IPR002048 // Calcium-binding EF-hand // 3.4E-4 /// IPR002048 // Calcium-binding EF-hand // 0.045 /// IPR002048 // Calcium-binding EF-hand // 4.2E-5 /// IPR002048 // Calcium-binding EF-hand // 3.4E-4 /// IPR002048 // Calcium-binding EF-hand // 0.045 /// IPR002048 // Calcium-binding EF-hand // 4.2E-5
13170	154369_at	0.803483	2.25837	3.96701	0.000392892	0.000984338	-0.972131	FBgn0000615	CG8994	exu	exuperantia	37345	3723 // RNA binding // inferred from electronic annotation	1700 // embryonic development (sensu Insecta) // inferred from mutant phenotype /// 7283 // spermatogenesis // traceable author statement /// 7300 // nurse cell to oocyte transport (sensu Insecta) // traceable author statement /// 8359 // regulation of bicoid mRNA localization // non-traceable author statement /// 45450 // bicoid mRNA localization // inferred from expression pattern /// 45450 // …	5737 // cytoplasm // inferred from direct assay /// 5737 // cytoplasm // traceable author statement	---
7644	148843_at	0.803048	0.365144	11.7269	5.12e-13	1.67e-11	19.5494	FBgn0036563	CG13075	CG13075	CG13075	39756	---	---	---	---
8487	149686_at	0.802062	1.03202	8.01462	4.28e-09	4.51e-08	10.4279	FBgn0037898	CG18643	CG18643	CG18643	41371	16787 // hydrolase activity // inferred from electronic annotation /// 16788 // hydrolase activity, acting on ester bonds // inferred from electronic annotation	19478 // D-amino acid catabolism // inferred from electronic annotation	5737 // cytoplasm // inferred from electronic annotation	IPR003732 // D-tyrosyl-tRNA(Tyr) deacylase // 1.6E-64
6946	148145_at	0.800739	1.86888	3.48785	0.00146144	0.00317747	-2.24418	FBgn0035497	CG14995	CG14995	CG14995	38487	---	35071 // salivary gland cell autophagic cell death // inferred from expression pattern /// 48102 // autophagic cell death // inferred from expression pattern	---	IPR001611 // Leucine-rich repeat // 0.0049 /// IPR001611 // Leucine-rich repeat // 0.0049
2825	144024_at	0.799656	2.57441	5.95185	1.33e-06	6.28e-06	4.65703	FBgn0024734	CG4993	PRL-1	PRL-1	34952	4727 // prenylated protein tyrosine phosphatase activity // inferred from sequence or structural similarity /// 4727 // prenylated protein tyrosine phosphatase activity // non-traceable author statement /// 8138 // protein tyrosine/serine/threonine phosphatase activity // non-traceable author statement /// 4721 // phosphoprotein phosphatase activity // inferred from electronic annotation /// 4725…	6470 // protein amino acid dephosphorylation // non-traceable author statement /// 6470 // protein amino acid dephosphorylation // inferred from electronic annotation	---	---
909	142108_at	0.797726	1.74781	6.47701	2.98e-07	1.72e-06	6.15864	---	---	---	---	---	---	---	---	---
5465	146664_at	0.797636	0.889182	4.91641	2.64e-05	8.75e-05	1.68374	FBgn0033052	CG33131	SCAP	SCAP	35529	---	42 // protein targeting to Golgi // non-traceable author statement /// 16485 // protein processing // non-traceable author statement /// 35103 // sterol regulatory element binding-protein cleavage // inferred from sequence or structural similarity /// 35103 // sterol regulatory element binding-protein cleavage // non-traceable author statement /// 35103 // sterol regulatory element binding-protei…	5795 // Golgi stack // inferred from electronic annotation /// 16021 // integral to membrane // inferred from electronic annotation	IPR001680 // G-protein beta WD-40 repeat // 1.7E-5 /// IPR001680 // G-protein beta WD-40 repeat // 0.014 /// IPR001680 // G-protein beta WD-40 repeat // 1.4E-5 /// IPR001680 // G-protein beta WD-40 repeat // 1.1E-5 /// IPR001680 // G-protein beta WD-40 repeat // 5.0E-7
10552	151751_at	0.797497	3.64096	5.70138	2.74e-06	1.18e-05	3.93717	FBgn0033739	CG8529	Dyb	Dystrobrevin-like	36362	3779 // actin binding // inferred from electronic annotation /// 5200 // structural constituent of cytoskeleton // inferred from electronic annotation /// 8092 // cytoskeletal protein binding // inferred from sequence or structural similarity /// 8270 // zinc ion binding // inferred from electronic annotation /// 8307 // structural constituent of muscle // inferred from sequence or structural sim…	6936 // muscle contraction // inferred from electronic annotation /// 7010 // cytoskeleton organization and biogenesis // inferred from electronic annotation /// 7018 // microtubule-based movement // inferred from electronic annotation /// 7263 // nitric oxide mediated signal transduction // inferred from electronic annotation /// 7274 // neuromuscular synaptic transmission // inferred from elect…	5874 // microtubule // inferred from electronic annotation /// 16010 // dystrophin-associated glycoprotein complex // inferred from sequence or structural similarity /// 16014 // dystrobrevin complex // inferred from sequence or structural similarity /// 16014 // dystrobrevin complex // non-traceable author statement /// 16010 // dystrophin-associated glycoprotein complex // inferred from sequenc…	IPR000433 // Zn-finger, ZZ type // 1.4E-8 /// IPR000433 // Zn-finger, ZZ type // 1.4E-8
2869	144068_at	0.795943	4.0017	4.30547	0.000151614	0.000417476	-0.0409317	FBgn0025583	CG18106	IM2	Immune induced molecule 2	49802	---	6952 // defense response // inferred from direct assay /// 6952 // defense response // non-traceable author statement /// 6955 // immune response // inferred from electronic annotation /// 45087 // innate immune response // inferred from electronic annotation	5576 // extracellular region // inferred from direct assay /// 5576 // extracellular region // non-traceable author statement	---
2315	143514_s_at	0.795439	-0.423766	9.33379	1.41e-10	2.29e-09	13.8744	FBgn0004783 /// FBgn0004782	CG1252 /// CG2360	Ccp84Aa /// Ccp84Ab	Ccp84Aa /// Ccp84Ab	40824 /// 40825	8010 // structural constituent of larval cuticle (sensu Insecta) // inferred from sequence or structural similarity /// 42302 // structural constituent of cuticle // inferred from electronic annotation /// 8010 // structural constituent of larval cuticle (sensu Insecta) // inferred from sequence similarity	---	---	IPR000618 // Insect cuticle protein // 3.3E-31 /// IPR000618 // Insect cuticle protein // 5.5E-31
7703	148902_at	0.79459	0.115956	9.55054	8.21e-11	1.43e-09	14.4192	FBgn0036643	CG4109	Syx8	Syntaxin 8	39847	5486 // t-SNARE activity // inferred from sequence or structural similarity /// 5486 // t-SNARE activity // inferred from sequence similarity	6886 // intracellular protein transport // inferred from electronic annotation /// 7269 // neurotransmitter secretion // inferred from sequence or structural similarity /// 16081 // synaptic vesicle docking during exocytosis // inferred from sequence or structural similarity /// 16192 // vesicle-mediated transport // inferred from sequence or structural similarity /// 7269 // neurotransmitter sec…	5886 // plasma membrane // inferred from sequence or structural similarity /// 5886 // plasma membrane // inferred from sequence similarity	IPR000727 // Target SNARE coiled-coil domain // 1.4E-13 /// IPR000727 // Target SNARE coiled-coil domain // 1.4E-13
4077	145276_at	0.794127	1.9771	11.4525	9.4e-13	2.79e-11	18.936	FBgn0030894	CG7192	CG7192	CG7192	32791	---	---	---	---
11248	152447_at	0.793774	4.7102	2.70699	0.010878	0.0189389	-4.14453	FBgn0034134	CG4750	CG4750	CG4750	36847	4178 // leucyl aminopeptidase activity // inferred from sequence or structural similarity /// 30145 // manganese ion binding // inferred from electronic annotation /// 4177 // aminopeptidase activity // inferred from electronic annotation /// 4178 // leucyl aminopeptidase activity // inferred from electronic annotation /// 4178 // leucyl aminopeptidase activity // inferred from sequence similarity	6508 // proteolysis // inferred from electronic annotation /// 19538 // protein metabolism // inferred from electronic annotation	5622 // intracellular // inferred from electronic annotation /// 5737 // cytoplasm // inferred from electronic annotation	IPR008283 // Peptidase M17, cytosol aminopeptidase, N-terminal // 6.3E-61 /// IPR000819 // Peptidase M17, cytosol aminopeptidase, C-terminal // 1.9E-41 /// IPR000819 // Peptidase M17, cytosol aminopeptidase, C-terminal // 8.7E-19
1859	143058_f_at	0.793206	4.25217	4.26771	0.000168736	0.000459472	-0.145883	FBgn0000042	CG4027	Act5C	Actin 5C	31521	3774 // motor activity // inferred from electronic annotation /// 5200 // structural constituent of cytoskeleton // inferred from sequence or structural similarity /// 5515 // protein binding // inferred from physical interaction /// 166 // nucleotide binding // inferred from electronic annotation /// 5198 // structural molecule activity // inferred from electronic annotation /// 5200 // structur…	910 // cytokinesis // inferred from mutant phenotype /// 7010 // cytoskeleton organization and biogenesis // inferred from sequence or structural similarity /// 7291 // sperm individualization // inferred from expression pattern /// 7010 // cytoskeleton organization and biogenesis // inferred from sequence similarity	5884 // actin filament // inferred from sequence or structural similarity /// 5884 // actin filament // non-traceable author statement /// 5856 // cytoskeleton // inferred from electronic annotation /// 5884 // actin filament // inferred from electronic annotation /// 5884 // actin filament // inferred from sequence similarity	IPR004000 // Actin/actin-like // 1.0E-126
1471	142670_at	0.790104	2.15299	6.5179	2.65e-07	1.56e-06	6.27489	FBgn0004108	CG9704	Nrt	Neurotactin	39873	3824 // catalytic activity // inferred from electronic annotation /// 5515 // protein binding // inferred from electronic annotation	7155 // cell adhesion // inferred from electronic annotation /// 7398 // ectoderm development // inferred from electronic annotation /// 7399 // nervous system development // inferred from electronic annotation /// 7409 // axonogenesis // inferred from mutant phenotype /// 7411 // axon guidance // inferred from mutant phenotype /// 7413 // axonal fasciculation // inferred from mutant phenotype //…	5886 // plasma membrane // inferred from direct assay /// 5886 // plasma membrane // inferred from sequence or structural similarity /// 16021 // integral to membrane // non-traceable author statement /// 16323 // basolateral plasma membrane // non-traceable author statement /// 16020 // membrane // inferred from electronic annotation /// 16021 // integral to membrane // inferred from electronic …	IPR002018 // Carboxylesterase, type B // 1.2E-104
11693	152892_at	0.78988	3.03646	5.36719	7.18e-06	2.77e-05	2.97589	FBgn0037623	CG9801	CG9801	CG9801	41044	---	---	---	---
7588	148787_at	0.788278	-0.314598	13.1569	2.49e-14	1.24e-12	22.5994	---	CG33957	---	---	---	---	7020 // microtubule nucleation // inferred from direct assay	---	---
9963	151162_at	0.785789	-0.477871	11.3562	1.17e-12	3.39e-11	18.7184	FBgn0040685	CG12587	CG12587	CG12587	50158	---	---	---	---
9581	150780_at	0.781539	1.37968	9.36225	1.31e-10	2.15e-09	13.9463	FBgn0039593	CG9989	CG9989	CG9989	43390	5515 // protein binding // inferred from physical interaction /// 3676 // nucleic acid binding // inferred from electronic annotation /// 4519 // endonuclease activity // inferred from electronic annotation	---	---	IPR001604 // DNA/RNA non-specific endonuclease // 1.5E-8
12819	154018_at	0.78123	3.30513	9.87503	3.71e-11	7.17e-10	15.2232	FBgn0027525	CG7686	CG7686	CG7686	36146	---	---	---	IPR007307 // Low temperature viability protein // 1.0E-126
13984	AFFX-Dros-ACTIN_M_r_at	0.781025	1.70194	6.01439	1.11e-06	5.38e-06	4.83651	---	---	---	---	---	5515 // protein binding // inferred from physical interaction /// 166 // nucleotide binding // inferred from electronic annotation /// 5198 // structural molecule activity // inferred from electronic annotation /// 5200 // structural constituent of cytoskeleton // inferred from electronic annotation /// 5515 // protein binding // inferred from electronic annotation /// 5524 // ATP binding // infe…	910 // cytokinesis // inferred from mutant phenotype	5856 // cytoskeleton // inferred from electronic annotation /// 5884 // actin filament // inferred from electronic annotation	---
2037	143236_at	0.780118	1.78606	5.70855	2.68e-06	1.16e-05	3.9578	FBgn0002542	CG2684	lds	lodestar	45894	3676 // nucleic acid binding // inferred from electronic annotation /// 3677 // DNA binding // inferred from electronic annotation /// 3678 // DNA helicase activity // inferred from electronic annotation /// 3717 // RNA polymerase II transcription termination factor activity // inferred from sequence or structural similarity /// 5524 // ATP binding // inferred from electronic annotation /// 8026 …	6281 // DNA repair // inferred from electronic annotation /// 6353 // transcription termination // inferred from direct assay /// 6357 // regulation of transcription from RNA polymerase II promoter // inferred from electronic annotation /// 6369 // transcription termination from RNA polymerase II promoter // inferred from sequence or structural similarity /// 6350 // transcription // inferred fro…	5634 // nucleus // non-traceable author statement /// 5654 // nucleoplasm // inferred from electronic annotation /// 5634 // nucleus // inferred from electronic annotation	IPR000330 // SNF2 related domain // 1.0E-126 /// IPR001650 // Helicase, C-terminal // 1.4E-20
13734	154933_at	0.778806	1.97618	8.29244	2.05e-09	2.41e-08	11.172	FBgn0026749	CG1989	Yippee	Yippee	32295	8270 // zinc ion binding // non-traceable author statement /// 46872 // metal ion binding // non-traceable author statement /// 5515 // protein binding // inferred from physical interaction	---	---	IPR004910 // Yippee-like protein // 2.2E-77
993	142192_at	0.77817	1.66231	7.21584	3.76e-08	2.89e-07	8.23903	FBgn0032879	CG9317	CG9317	CG9317	35334	8513 // organic cation porter activity // inferred from sequence or structural similarity /// 5215 // transporter activity // inferred from electronic annotation /// 8513 // organic cation porter activity // inferred from sequence similarity	6812 // cation transport // inferred from electronic annotation /// 6820 // anion transport // inferred from electronic annotation /// 6858 // extracellular transport // inferred from electronic annotation /// 6810 // transport // inferred from electronic annotation	16021 // integral to membrane // inferred from electronic annotation /// 16020 // membrane // inferred from electronic annotation	IPR005828 // General substrate transporter // 7.2E-17 /// IPR005828 // General substrate transporter // 7.2E-17
5304	146503_at	0.777939	2.93795	8.54602	1.05e-09	1.35e-08	11.8428	FBgn0041180	CG10363	TepIV	Thiolester containing protein IV	35248	4866 // endopeptidase inhibitor activity // inferred from electronic annotation /// 5351 // sugar porter activity // inferred from electronic annotation /// 30414 // protease inhibitor activity // inferred from sequence or structural similarity /// 30414 // protease inhibitor activity // inferred from sequence similarity	6961 // antibacterial humoral response (sensu Protostomia) // inferred from direct assay /// 9401 // phosphoenolpyruvate-dependent sugar phosphotransferase system // inferred from electronic annotation	---	IPR001599 // Alpha-2-macroglobulin // 1.4E-100 /// IPR002890 // Alpha-2-macroglobulin, N-terminal // 1.9E-16 /// IPR002890 // Alpha-2-macroglobulin, N-terminal // 7.5E-11 /// IPR002890 // Alpha-2-macroglobulin, N-terminal // 3.1E-9
150	141349_at	0.777906	2.61072	7.80038	7.61e-09	7.37e-08	9.84783	FBgn0036945	CG6981	CG6981	CG6981	40207	5515 // protein binding // inferred from physical interaction	---	---	---
4656	145855_at	0.777384	0.64332	7.99276	4.54e-09	4.73e-08	10.3689	FBgn0043362	CG14001	bchs	blue cheese	33819	8270 // zinc ion binding // inferred from electronic annotation	6605 // protein targeting // inferred from electronic annotation /// 7041 // lysosomal transport // inferred from sequence or structural similarity /// 7041 // lysosomal transport // inferred from sequence similarity	5737 // cytoplasm // inferred from direct assay /// 30424 // axon // non-traceable author statement	IPR000306 // Zn-finger, FYVE type // 1.4E-27 /// IPR000409 // Beige/BEACH domain // 1.0E-126 /// IPR001680 // G-protein beta WD-40 repeat // 6.2E-12 /// IPR001680 // G-protein beta WD-40 repeat // 0.042 /// IPR001680 // G-protein beta WD-40 repeat // 5.2E-5
10533	151732_at	0.776363	1.40575	7.39655	2.28e-08	1.89e-07	8.74027	FBgn0028394	CG17834	CG17834	CG17834	34191	---	---	---	---
8603	149802_at	0.77599	-0.312573	9.39859	1.2e-10	1.99e-09	14.0379	FBgn0051345	CG31345	CG31345	CG31345	41576	5509 // calcium ion binding // inferred from sequence or structural similarity /// 5509 // calcium ion binding // inferred from sequence similarity	5513 // detection of calcium ion // inferred from sequence or structural similarity /// 5513 // detection of calcium ion // inferred from sequence similarity	---	IPR002048 // Calcium-binding EF-hand // 0.0014 /// IPR002048 // Calcium-binding EF-hand // 1.9E-5 /// IPR002048 // Calcium-binding EF-hand // 1.2E-5
10081	151280_i_at	0.774421	-1.1018	7.0649	5.71e-08	4.16e-07	7.81787	---	---	---	---	---	---	---	---	---
86	141285_at	0.773941	0.767072	3.26866	0.00261777	0.00536105	-2.80254	FBgn0038320	CG4931	Sra-1	specifically Rac1-associated protein 1	41861	17048 // Rho GTPase binding // non-traceable author statement /// 5515 // protein binding // inferred from physical interaction	7165 // signal transduction // inferred from electronic annotation /// 7411 // axon guidance // inferred from mutant phenotype /// 8360 // regulation of cell shape // inferred from mutant phenotype /// 30031 // cell projection biogenesis // inferred from mutant phenotype /// 30866 // cortical actin cytoskeleton organization and biogenesis // inferred from mutant phenotype /// 50807 // regulation …	---	IPR008081 // Cytoplasmic fragile X mental retardation protein interacting protein // 1.0E-126
3882	145081_i_at	0.773494	-0.171849	7.98834	4.59e-09	4.78e-08	10.357	---	---	---	---	---	---	---	---	---
5331	146530_at	0.772201	0.663445	8.53101	1.09e-09	1.4e-08	11.8033	FBgn0045064	CG13969	bwa	brain washing	250736	17040 // ceramidase activity // non-traceable author statement /// 16811 // hydrolase activity, acting on carbon-nitrogen (but not peptide) bonds, in linear amides // inferred from electronic annotation	6672 // ceramide metabolism // inferred from electronic annotation /// 7420 // brain development // inferred from mutant phenotype	139 // Golgi membrane // inferred from electronic annotation /// 5789 // endoplasmic reticulum membrane // inferred from electronic annotation /// 16021 // integral to membrane // inferred from electronic annotation	IPR008901 // Alkaline phytoceramidase // 1.0E-126
90	141289_at	0.771995	1.17441	4.93405	2.51e-05	8.38e-05	1.73408	FBgn0037636	CG9821	CG9821	CG9821	41058	5515 // protein binding // inferred from physical interaction	---	---	---
5001	146200_at	0.769022	0.301425	10.0165	2.63e-11	5.35e-10	15.5694	FBgn0032307 /// FBgn0032306	CG31722	CG17139 /// CG17140	CG17139 /// CG17140	34497 /// 3885616	8308 // voltage-gated ion-selective channel activity // inferred from electronic annotation	6820 // anion transport // inferred from electronic annotation	5741 // mitochondrial outer membrane // inferred from electronic annotation	---
592	141791_at	0.767655	1.80372	5.82297	1.93e-06	8.7e-06	4.2868	FBgn0010379	CG4006	Akt1	Akt1	41957	4672 // protein kinase activity // inferred from direct assay /// 4674 // protein serine/threonine kinase activity // inferred from mutant phenotype /// 4674 // protein serine/threonine kinase activity // inferred from sequence or structural similarity /// 4674 // protein serine/threonine kinase activity // non-traceable author statement /// 4702 // receptor signaling protein serine/threonine kin…	6468 // protein amino acid phosphorylation // non-traceable author statement /// 6916 // anti-apoptosis // inferred from mutant phenotype /// 7424 // tracheal system development (sensu Insecta) // inferred from mutant phenotype /// 7424 // tracheal system development (sensu Insecta) // traceable author statement /// 8286 // insulin receptor signaling pathway // non-traceable author statement /// …	5886 // plasma membrane // non-traceable author statement /// 16020 // membrane // inferred from electronic annotation	IPR000719 // Protein kinase // 3.6E-100 /// IPR001849 // Pleckstrin-like // 2.5E-25 /// IPR000961 // Protein kinase C-terminal domain // 1.6E-19 /// IPR000719 // Protein kinase // 3.6E-100 /// IPR001849 // Pleckstrin-like // 2.5E-25 /// IPR000961 // Protein kinase C-terminal domain // 1.6E-19
6903	148102_at	0.76705	0.912321	7.84583	6.73e-09	6.65e-08	9.97132	FBgn0052279	CG32279	dro2	drosomycin-2	38408	8200 // ion channel inhibitor activity // inferred from electronic annotation	6952 // defense response // non-traceable author statement /// 6952 // defense response // inferred from electronic annotation /// 9405 // pathogenesis // inferred from electronic annotation	5576 // extracellular region // inferred from electronic annotation	IPR008176 // Gamma thionin // 2.7E-18
5825	147024_at	0.7669	1.48711	6.37934	3.93e-07	2.18e-06	5.88047	FBgn0033639	CG9003	CG9003	CG9003	36244	---	6508 // proteolysis // inferred from electronic annotation /// 19538 // protein metabolism // inferred from electronic annotation /// 6512 // ubiquitin cycle // inferred from electronic annotation	---	IPR001611 // Leucine-rich repeat // 0.019 /// IPR001611 // Leucine-rich repeat // 0.63 /// IPR001810 // Cyclin-like F-box // 3.4E-11 /// IPR001611 // Leucine-rich repeat // 0.019 /// IPR001611 // Leucine-rich repeat // 0.63 /// IPR001810 // Cyclin-like F-box // 3.4E-11
5507	146706_at	0.76569	-0.34436	9.41872	1.14e-10	1.91e-09	14.0886	FBgn0053349	CG33349	ppk25	pickpocket 25	2768722	---	16542 // male courtship behavior (sensu Insecta) // inferred from mutant phenotype	---	---
9845	151044_at	0.76549	-0.250682	12.9446	3.84e-14	1.8e-12	22.1616	---	---	---	---	---	---	---	---	---
9653	150852_at	0.764138	0.598749	14.5755	1.54e-15	1.14e-13	25.3973	FBgn0039711	CG7824	CG7824	CG7824	43530	---	---	---	---
9156	150355_at	0.762687	0.432959	3.9911	0.000367358	0.000925997	-0.906638	FBgn0038949	CG7071	CG7071	CG7071	42617	---	---	---	---
7303	148502_at	0.762661	0.831725	7.1109	5.02e-08	3.72e-07	7.94645	FBgn0036059	CG8104	nudE	nudE	39169	5515 // protein binding // inferred from physical interaction	6928 // cell motility // inferred from electronic annotation /// 7010 // cytoskeleton organization and biogenesis // inferred from electronic annotation /// 7275 // development // inferred from electronic annotation /// 7398 // ectoderm development // inferred from electronic annotation /// 7399 // nervous system development // inferred from electronic annotation	---	IPR006964 // NUDE protein, C-terminal // 9.2E-73
2166	143365_at	0.760008	2.57295	7.62788	1.21e-08	1.1e-07	9.37691	FBgn0003499	CG7847	sr	stripe	42162	3676 // nucleic acid binding // inferred from electronic annotation /// 3702 // RNA polymerase II transcription factor activity // inferred from sequence or structural similarity /// 8270 // zinc ion binding // inferred from electronic annotation /// 46872 // metal ion binding // inferred from electronic annotation /// 3702 // RNA polymerase II transcription factor activity // inferred from seque…	6357 // regulation of transcription from RNA polymerase II promoter // inferred from electronic annotation /// 7417 // central nervous system development // inferred from mutant phenotype /// 7427 // tracheal epithelial cell migration (sensu Insecta) // inferred from genetic interaction /// 7427 // tracheal epithelial cell migration (sensu Insecta) // inferred from mutant phenotype /// 7517 // mu…	5634 // nucleus // inferred from sequence or structural similarity /// 5634 // nucleus // inferred from electronic annotation /// 5634 // nucleus // inferred from sequence similarity	IPR007087 // Zn-finger, C2H2 type // 1.7E-7 /// IPR007087 // Zn-finger, C2H2 type // 1.5E-5 /// IPR007087 // Zn-finger, C2H2 type // 3.9E-5 /// IPR007087 // Zn-finger, C2H2 type // 1.7E-7 /// IPR007087 // Zn-finger, C2H2 type // 1.5E-5 /// IPR007087 // Zn-finger, C2H2 type // 3.9E-5
2984	144183_at	0.759644	2.86257	8.21696	2.5e-09	2.86e-08	10.9707	FBgn0027506	CG6542	EDTP	Egg-derived tyrosine phosphatase	36959	4725 // protein tyrosine phosphatase activity // non-traceable author statement /// 5515 // protein binding // inferred from physical interaction /// 4721 // phosphoprotein phosphatase activity // inferred from electronic annotation	6470 // protein amino acid dephosphorylation // non-traceable author statement /// 6470 // protein amino acid dephosphorylation // inferred from electronic annotation	---	---
10347	151546_i_at	0.759624	-0.470299	10.0899	2.2e-11	4.58e-10	15.7481	FBgn0026577	CG8677	CG8677	CG8677	35397	3677 // DNA binding // inferred from electronic annotation /// 5515 // protein binding // inferred from electronic annotation /// 8270 // zinc ion binding // inferred from electronic annotation	6355 // regulation of transcription, DNA-dependent // inferred from electronic annotation	---	IPR001965 // Zn-finger-like, PHD finger // 2.2E-12
12871	154070_at	0.757369	0.160504	12.3993	1.2e-13	4.79e-12	21.0137	FBgn0004462	CG7001	Pk17E	Protein kinase-like 17E	45970	4674 // protein serine/threonine kinase activity // inferred from sequence or structural similarity /// 4674 // protein serine/threonine kinase activity // non-traceable author statement /// 4702 // receptor signaling protein serine/threonine kinase activity // inferred from electronic annotation /// 5524 // ATP binding // inferred from electronic annotation /// 166 // nucleotide binding // infer…	165 // MAPKKK cascade // inferred from electronic annotation /// 6468 // protein amino acid phosphorylation // inferred from sequence or structural similarity /// 6468 // protein amino acid phosphorylation // non-traceable author statement /// 7049 // cell cycle // inferred from electronic annotation /// 6468 // protein amino acid phosphorylation // inferred from electronic annotation /// 6468 //…	---	IPR000719 // Protein kinase // 9.1E-63
10409	151608_s_at	0.757239	-0.71475	11.0007	2.61e-12	6.95e-11	17.9053	FBgn0036511	CG6498	CG6498	CG6498	39686	4674 // protein serine/threonine kinase activity // inferred from sequence or structural similarity /// 4674 // protein serine/threonine kinase activity // non-traceable author statement /// 4702 // receptor signaling protein serine/threonine kinase activity // inferred from electronic annotation /// 5515 // protein binding // inferred from electronic annotation /// 5524 // ATP binding // inferre…	6468 // protein amino acid phosphorylation // non-traceable author statement /// 7242 // intracellular signaling cascade // inferred from electronic annotation /// 6468 // protein amino acid phosphorylation // inferred from electronic annotation	---	IPR001478 // PDZ/DHR/GLGF domain // 7.6E-7 /// IPR000719 // Protein kinase // 3.6E-80
10832	152031_at	0.756806	2.47829	5.19469	1.18e-05	4.29e-05	2.48036	FBgn0011244	CG2830	Hsp60B	Heat shock protein 60 related	48572	5524 // ATP binding // inferred from electronic annotation /// 42623 // ATPase activity, coupled // inferred from sequence or structural similarity /// 51082 // unfolded protein binding // inferred from sequence or structural similarity /// 166 // nucleotide binding // inferred from electronic annotation /// 5515 // protein binding // inferred from electronic annotation /// 51082 // unfolded prot…	6457 // protein folding // inferred from sequence or structural similarity /// 6458 // 'de novo' protein folding // inferred from sequence or structural similarity /// 6626 // protein targeting to mitochondrion // inferred from sequence or structural similarity /// 7286 // spermatid development // inferred from mutant phenotype /// 9408 // response to heat // inferred from sequence or structural …	5739 // mitochondrion // inferred from sequence or structural similarity /// 5759 // mitochondrial matrix // inferred from sequence or structural similarity /// 5739 // mitochondrion // inferred from sequence similarity /// 5759 // mitochondrial matrix // inferred from sequence similarity	IPR002423 // Chaperonin Cpn60/TCP-1 // 1.0E-126
10252	151451_at	0.756769	-0.695014	7.01256	6.6e-08	4.69e-07	7.67133	FBgn0045852	CG31753	ham	hamlet	35135	3700 // transcription factor activity // inferred from mutant phenotype /// 3700 // transcription factor activity // non-traceable author statement /// 8270 // zinc ion binding // inferred from electronic annotation /// 3676 // nucleic acid binding // inferred from electronic annotation /// 3677 // DNA binding // inferred from electronic annotation /// 46872 // metal ion binding // inferred from …	6355 // regulation of transcription, DNA-dependent // inferred from mutant phenotype /// 6357 // regulation of transcription from RNA polymerase II promoter // inferred from electronic annotation /// 7423 // sensory organ development // inferred from mutant phenotype /// 16358 // dendrite development // traceable author statement /// 42659 // regulation of cell fate specification // traceable aut…	5634 // nucleus // inferred from direct assay /// 5634 // nucleus // traceable author statement /// 5634 // nucleus // inferred from electronic annotation	IPR007087 // Zn-finger, C2H2 type // 5.8E-7 /// IPR007087 // Zn-finger, C2H2 type // 1.5E-6 /// IPR007087 // Zn-finger, C2H2 type // 5.1E-5 /// IPR007087 // Zn-finger, C2H2 type // 5.7E-8 /// IPR007087 // Zn-finger, C2H2 type // 2.4E-6 /// IPR007087 // Zn-finger, C2H2 type // 5.0E-6
9294	150493_at	0.756533	-0.750167	10.3248	1.26e-11	2.84e-10	16.3147	FBgn0039167	CG17786	CG17786	CG17786	42879	---	---	---	---
9119	150318_at	0.756449	1.0496	8.13996	3.06e-09	3.4e-08	10.7647	FBgn0038893	CG6353	CG6353	CG6353	42551	---	---	---	IPR002804 // Protein of unknown function DUF101 // 3.2E-81
4907	146106_at	0.756173	0.796139	3.6324	0.000988373	0.00223629	-1.86725	FBgn0032147	CG4026	IP3K1	Inositol 1,4,5-triphosphate kinase 1	34300	8440 // inositol trisphosphate 3-kinase activity // inferred from sequence or structural similarity /// 8440 // inositol trisphosphate 3-kinase activity // inferred from electronic annotation /// 8440 // inositol trisphosphate 3-kinase activity // inferred from sequence similarity	6979 // response to oxidative stress // inferred from mutant phenotype	---	IPR005522 // Inositol polyphosphate kinase // 9.5E-75
12577	153776_at	0.755549	1.74704	7.2114	3.8e-08	2.92e-07	8.22667	FBgn0033051	CG7863	dream	dream	35528	30693 // caspase activity // inferred from sequence or structural similarity /// 30693 // caspase activity // non-traceable author statement /// 30693 // caspase activity // traceable author statement /// 30693 // caspase activity // inferred from electronic annotation /// 30693 // caspase activity // inferred from sequence similarity	6508 // proteolysis // inferred from electronic annotation /// 6915 // apoptosis // inferred from electronic annotation /// 7242 // intracellular signaling cascade // inferred from electronic annotation /// 12501 // programmed cell death // traceable author statement	---	IPR001309 // Caspase-1, p20 // 1.1E-68
7827	149026_at	0.754375	0.141288	10.8272	3.88e-12	9.96e-11	17.5027	FBgn0036836	CG11619	CG11619	CG11619	40072	---	---	---	IPR004129 // Glycerophosphoryl diester phosphodiesterase // 1.3E-42
969	142168_at	0.753375	1.99051	5.58408	3.84e-06	1.6e-05	3.59973	FBgn0038748	CG12378	CG12378	CG12378	42372	---	---	---	---
7529	148728_at	0.753134	-0.464912	8.15877	2.91e-09	3.26e-08	10.8151	FBgn0036384	CG17368	CG17368	CG17368	39533	---	---	---	---
5566	146765_at	0.752387	1.66593	4.11491	0.000259678	0.000677611	-0.567979	FBgn0050497	CG30497	CG30497	CG30497	246653	---	---	---	---
5379	146578_at	0.751641	0.77606	8.33956	1.81e-09	2.17e-08	11.2972	FBgn0026255	CG8681	clumsy	clumsy	35394	5234 // glutamate-gated ion channel activity // inferred from electronic annotation /// 5267 // potassium channel activity // inferred from electronic annotation /// 15276 // ligand-gated ion channel activity // inferred from electronic annotation /// 15277 // kainate selective glutamate receptor activity // inferred from sequence or structural similarity /// 5215 // transporter activity // infer…	6812 // cation transport // inferred from electronic annotation /// 6813 // potassium ion transport // inferred from electronic annotation /// 6936 // muscle contraction // inferred from electronic annotation /// 7270 // nerve-nerve synaptic transmission // inferred from electronic annotation /// 7274 // neuromuscular synaptic transmission // inferred from electronic annotation /// 6810 // transp…	16020 // membrane // inferred from electronic annotation	IPR001828 // Extracellular ligand-binding receptor // 8.4E-31 /// IPR001320 // Ionotropic glutamate receptor // 4.6E-98
1322	142521_at	0.750898	0.585944	6.74448	1.4e-07	8.98e-07	6.91698	FBgn0030960	CG7053	CG7053	CG7053	32871	5515 // protein binding // inferred from physical interaction /// 166 // nucleotide binding // inferred from electronic annotation /// 4672 // protein kinase activity // inferred from electronic annotation /// 4674 // protein serine/threonine kinase activity // inferred from electronic annotation /// 5524 // ATP binding // inferred from electronic annotation /// 16301 // kinase activity // inferr…	6468 // protein amino acid phosphorylation // inferred from electronic annotation	---	---
2549	143748_at	0.750797	2.16409	7.05796	5.82e-08	4.22e-07	7.79846	FBgn0014073	CG7525	Tie	Tie-like receptor tyrosine kinase	38559	4713 // protein-tyrosine kinase activity // inferred from sequence or structural similarity /// 4713 // protein-tyrosine kinase activity // non-traceable author statement /// 4715 // non-membrane spanning protein tyrosine kinase activity // inferred from electronic annotation /// 5524 // ATP binding // inferred from electronic annotation /// 166 // nucleotide binding // inferred from electronic a…	6468 // protein amino acid phosphorylation // inferred from sequence or structural similarity /// 6468 // protein amino acid phosphorylation // non-traceable author statement /// 7259 // JAK-STAT cascade // inferred from electronic annotation /// 6468 // protein amino acid phosphorylation // inferred from electronic annotation /// 6468 // protein amino acid phosphorylation // inferred from sequen…	---	IPR000719 // Protein kinase // 8.8E-46 /// IPR000719 // Protein kinase // 1.3E-29
10169	151368_at	0.750785	0.569914	7.59369	1.33e-08	1.19e-07	9.28319	FBgn0040895	CG14773	CG14773	CG14773	50369	---	---	---	---
5352	146551_at	0.750771	-0.0783401	13.5345	1.16e-14	6.63e-13	23.3654	FBgn0032885	CG9326	CG9326	CG9326	35343	4385 // guanylate kinase activity // inferred from sequence or structural similarity /// 5515 // protein binding // inferred from electronic annotation /// 4385 // guanylate kinase activity // inferred from sequence similarity	6144 // purine base metabolism // inferred from electronic annotation /// 6605 // protein targeting // inferred from electronic annotation /// 7165 // signal transduction // inferred from electronic annotation /// 8105 // asymmetric protein localization // inferred from electronic annotation	16020 // membrane // inferred from sequence or structural similarity /// 16020 // membrane // inferred from sequence similarity	IPR001478 // PDZ/DHR/GLGF domain // 2.9E-11 /// IPR001452 // SH3 // 2.1E-6 /// IPR008144 // Guanylate kinase // 1.5E-30 /// IPR001452 // SH3 // 2.1E-6 /// IPR008144 // Guanylate kinase // 1.5E-30
10503	151702_r_at	0.749929	3.45979	4.97297	2.24e-05	7.61e-05	1.84526	FBgn0030969	CG7288	CG7288	CG7288	32881	4197 // cysteine-type endopeptidase activity // inferred from electronic annotation /// 4221 // ubiquitin thiolesterase activity // inferred from electronic annotation /// 4843 // ubiquitin-specific protease activity // inferred from sequence or structural similarity /// 4843 // ubiquitin-specific protease activity // inferred from sequence similarity	6508 // proteolysis // inferred from electronic annotation /// 6511 // ubiquitin-dependent protein catabolism // inferred from electronic annotation /// 16579 // protein deubiquitination // inferred from sequence or structural similarity /// 16579 // protein deubiquitination // inferred from sequence similarity	---	IPR001394 // Peptidase C19, ubiquitin carboxyl-terminal hydrolase family 2 // 2.6E-10 /// IPR001394 // Peptidase C19, ubiquitin carboxyl-terminal hydrolase family 2 // 1.2E-17
9929	151128_at	0.748876	-0.842917	11.8966	3.53e-13	1.21e-11	19.9242	FBgn0040644	CG14583	CG14583	CG14583	50117	---	---	---	IPR007110 // Immunoglobulin-like // 3.4E-9
1122	142321_at	0.74848	3.62849	4.73215	4.48e-05	0.000141242	1.15921	FBgn0030277	CG1394	CG1394	CG1394	32059	5524 // ATP binding // inferred from electronic annotation	---	---	---
7956	149155_at	0.746285	1.91416	6.00476	1.14e-06	5.51e-06	4.80889	FBgn0037037	CG10588	CG10588	CG10588	40316	16919 // nardilysin activity // inferred from sequence or structural similarity /// 16919 // nardilysin activity // inferred from sequence similarity	6508 // proteolysis // inferred from electronic annotation	---	IPR007863 // Peptidase M16, C-terminal // 2.5E-27 /// IPR007863 // Peptidase M16, C-terminal // 6.6E-23 /// IPR001431 // Peptidase M16, insulinase-like // 1.5E-34
13952	155151_at	0.745756	1.70935	13.3787	1.59e-14	8.67e-13	23.0512	FBgn0034312	CG10916	CG10916	CG10916	37081	5515 // protein binding // inferred from electronic annotation /// 8270 // zinc ion binding // inferred from electronic annotation /// 46872 // metal ion binding // inferred from electronic annotation	6512 // ubiquitin cycle // inferred from electronic annotation	5634 // nucleus // inferred from electronic annotation	IPR001841 // Zn-finger, RING // 9.1E-14
2574	143773_at	0.744699	0.242389	7.86572	6.38e-09	6.36e-08	10.0253	FBgn0014949	CG5264	btn	buttonless	42664	3677 // DNA binding // inferred from electronic annotation /// 3677 // DNA binding // inferred from sequence or structural similarity /// 3700 // transcription factor activity // inferred from electronic annotation /// 3700 // transcription factor activity // inferred from sequence or structural similarity /// 3677 // DNA binding // inferred from sequence similarity /// 3700 // transcription fact…	6355 // regulation of transcription, DNA-dependent // inferred from sequence or structural similarity /// 6357 // regulation of transcription from RNA polymerase II promoter // inferred from electronic annotation /// 6355 // regulation of transcription, DNA-dependent // inferred from sequence similarity	5634 // nucleus // inferred from sequence or structural similarity /// 5634 // nucleus // inferred from sequence similarity	IPR001356 // Homeobox // 4.8E-28
2308	143507_at	0.744687	2.35817	7.08096	5.46e-08	4e-07	7.8628	FBgn0004657	CG1560	mys	myospheroid	44885	4872 // receptor activity // traceable author statement /// 50839 // cell adhesion molecule binding // traceable author statement /// 4872 // receptor activity // inferred from electronic annotation /// 5515 // protein binding // inferred from electronic annotation	6952 // defense response // inferred from electronic annotation /// 7010 // cytoskeleton organization and biogenesis // inferred from electronic annotation /// 7155 // cell adhesion // inferred from mutant phenotype /// 7157 // heterophilic cell adhesion // traceable author statement /// 7160 // cell-matrix adhesion // traceable author statement /// 7165 // signal transduction // inferred from el…	5925 // focal adhesion // inferred from sequence or structural similarity /// 8305 // integrin complex // inferred from sequence or structural similarity /// 8305 // integrin complex // non-traceable author statement /// 8305 // integrin complex // inferred from electronic annotation /// 16020 // membrane // inferred from electronic annotation /// 16021 // integral to membrane // inferred from el…	IPR002369 // Integrin, beta chain // 1.0E-126
76	141275_at	0.744307	1.4706	6.53128	2.55e-07	1.5e-06	6.31292	FBgn0030790	CG4768	CG4768	CG4768	32666	---	---	---	---
13554	154753_at	0.743533	2.14152	8.99827	3.29e-10	4.82e-09	13.019	FBgn0030870	CG6398	CG6398	CG6398	32761	---	---	---	---
7609	148808_at	0.743108	1.34875	6.37371	3.99e-07	2.21e-06	5.86442	FBgn0053983	---	CG33983	CG33983	39681	8061 // chitin binding // inferred from electronic annotation	6030 // chitin metabolism // inferred from electronic annotation	5576 // extracellular region // inferred from electronic annotation	---
9471	150670_i_at	0.742455	-0.471205	12.5672	8.42e-14	3.56e-12	21.3708	FBgn0039441	CG5476	CG5476	CG5476	43207	---	---	---	IPR004145 // Protein of unknown function DUF243 // 7.9E-85
9173	150372_at	0.742078	3.41771	6.01542	1.11e-06	5.37e-06	4.83948	FBgn0038978	CG7045	CG7045	CG7045	42650	3677 // DNA binding // inferred from sequence or structural similarity /// 3677 // DNA binding // inferred from sequence similarity	6355 // regulation of transcription, DNA-dependent // inferred from electronic annotation	785 // chromatin // inferred from sequence or structural similarity /// 5634 // nucleus // inferred from sequence or structural similarity /// 785 // chromatin // inferred from sequence similarity /// 5634 // nucleus // inferred from sequence similarity	IPR000910 // HMG1/2 (high mobility group) box // 1.1E-24
11649	152848_at	0.741496	1.03843	8.6581	7.87e-10	1.04e-08	12.1367	FBgn0033443	CG1698	CG1698	CG1698	36006	5328 // neurotransmitter:sodium symporter activity // inferred from electronic annotation /// 8324 // cation transporter activity // inferred from electronic annotation /// 17032 // potassium:amino acid symporter activity // inferred from sequence or structural similarity /// 15293 // symporter activity // inferred from electronic annotation /// 17032 // potassium:amino acid symporter activity //…	6520 // amino acid metabolism // inferred from electronic annotation /// 6812 // cation transport // inferred from electronic annotation /// 6836 // neurotransmitter transport // inferred from electronic annotation /// 6858 // extracellular transport // inferred from electronic annotation /// 6865 // amino acid transport // inferred from electronic annotation /// 6810 // transport // inferred fro…	5887 // integral to plasma membrane // inferred from electronic annotation /// 16020 // membrane // inferred from electronic annotation /// 16021 // integral to membrane // inferred from electronic annotation	IPR000175 // Sodium:neurotransmitter symporter // 1.0E-126
1540	142739_at	0.741408	0.645234	8.68066	7.42e-10	9.85e-09	12.1957	FBgn0050007	CG30007	CG30007	CG30007	36027	---	---	---	---
6909	148108_at	0.741267	1.91126	11.8654	3.78e-13	1.28e-11	19.8556	FBgn0035444	CG12012	CG12012	CG12012	38422	---	---	---	---
10356	151555_at	0.740808	2.06922	5.37986	6.92e-06	2.68e-05	3.01229	FBgn0037238	CG1090	CG1090	CG1090	40551	8273 // calcium, potassium:sodium antiporter activity // inferred from sequence or structural similarity /// 15268 // alpha-type channel activity // inferred from electronic annotation /// 8273 // calcium, potassium:sodium antiporter activity // inferred from sequence similarity	6812 // cation transport // inferred from electronic annotation	16021 // integral to membrane // inferred from electronic annotation	IPR004837 // Sodium/calcium exchanger membrane region // 3.9E-19 /// IPR004837 // Sodium/calcium exchanger membrane region // 4.4E-35 /// IPR004837 // Sodium/calcium exchanger membrane region // 4.8E-32 /// IPR004837 // Sodium/calcium exchanger membrane region // 4.4E-35 /// IPR004837 // Sodium/calcium exchanger membrane region // 2.9E-26
1945	143144_at	0.740797	1.78885	5.62692	3.39e-06	1.43e-05	3.72298	FBgn0000560	CG7383	eg	eagle	40428	3700 // transcription factor activity // inferred from sequence or structural similarity /// 4879 // ligand-dependent nuclear receptor activity // inferred from sequence or structural similarity /// 4879 // ligand-dependent nuclear receptor activity // non-traceable author statement /// 5515 // protein binding // inferred from physical interaction /// 3677 // DNA binding // inferred from electron…	6357 // regulation of transcription from RNA polymerase II promoter // inferred from electronic annotation /// 7165 // signal transduction // inferred from electronic annotation /// 7417 // central nervous system development // inferred from mutant phenotype /// 6350 // transcription // inferred from electronic annotation /// 6355 // regulation of transcription, DNA-dependent // inferred from ele…	5634 // nucleus // inferred from sequence or structural similarity /// 5634 // nucleus // non-traceable author statement /// 5634 // nucleus // inferred from electronic annotation /// 5634 // nucleus // inferred from sequence similarity	IPR001628 // Zn-finger, C4-type steroid receptor // 7.1E-47
13902	155101_at	0.740661	2.50883	6.64494	1.85e-07	1.14e-06	6.63537	FBgn0034873	CG5360	CG5360	CG5360	37723	5515 // protein binding // inferred from physical interaction	---	---	---
5211	146410_at	0.740116	2.25873	5.82746	1.9e-06	8.6e-06	4.29969	FBgn0032648	CG15144	CG15144	CG15144	35063	---	---	---	---
8912	150111_at	0.740009	1.58349	6.59356	2.14e-07	1.29e-06	6.48971	FBgn0000363	CG31243	cpo	couch potato	45840	3729 // mRNA binding // inferred from sequence or structural similarity /// 166 // nucleotide binding // inferred from electronic annotation /// 3676 // nucleic acid binding // inferred from electronic annotation /// 3723 // RNA binding // inferred from electronic annotation /// 3729 // mRNA binding // inferred from sequence similarity	7268 // synaptic transmission // inferred from mutant phenotype /// 7422 // peripheral nervous system development // non-traceable author statement /// 50875 // cellular physiological process // inferred from mutant phenotype	5634 // nucleus // inferred from direct assay /// 5634 // nucleus // non-traceable author statement /// 5634 // nucleus // inferred from electronic annotation	IPR000504 // RNA-binding region RNP-1 (RNA recognition motif) // 1.5E-12
5814	147013_at	0.739868	-0.609983	10.9832	2.71e-12	7.21e-11	17.8649	FBgn0003382	CG13209	sha	shavenoid	36213	---	7469 // antennal development // inferred from mutant phenotype /// 35316 // trichome organization and biogenesis (sensu Insecta) // inferred from mutant phenotype	---	---
11914	153113_at	0.739088	2.70743	8.28353	2.1e-09	2.46e-08	11.1482	FBgn0036318	CG11009	CG11009	CG11009	39460	---	---	---	IPR004182 // GRAM domain // 3.1E-15
5606	146805_at	0.739026	4.04643	2.83967	0.00784982	0.014174	-3.84056	FBgn0033286	CG2127	CG2127	CG2127	35811	---	---	---	IPR006611 // Cysteine-rich protein of unknown function DM6 // 9.7E-86 /// IPR006611 // Cysteine-rich protein of unknown function DM6 // 9.7E-86
895	142094_at	0.737678	1.26115	7.03291	6.24e-08	4.48e-07	7.72835	---	---	---	---	---	---	---	---	---
10122	151321_at	0.73752	-0.030023	7.84181	6.8e-09	6.7e-08	9.96042	FBgn0033039	CG7897	gp210	gp210	35512	5215 // transporter activity // inferred from electronic annotation	6605 // protein targeting // inferred from electronic annotation /// 7611 // learning and/or memory // inferred from mutant phenotype /// 8355 // olfactory learning // inferred from mutant phenotype	16021 // integral to membrane // non-traceable author statement	---
10802	152001_at	0.736122	0.433921	8.96462	3.58e-10	5.21e-09	12.9324	FBgn0031778	CG9162	CG9162	CG9162	33860	---	---	---	---
11714	152913_at	0.735909	2.40001	5.85117	1.78e-06	8.12e-06	4.36784	FBgn0041203	CG1848	LIMK1	LIM-kinase1	32207	4672 // protein kinase activity // non-traceable author statement /// 4674 // protein serine/threonine kinase activity // inferred from direct assay /// 4674 // protein serine/threonine kinase activity // inferred from sequence or structural similarity /// 4674 // protein serine/threonine kinase activity // non-traceable author statement /// 4702 // receptor signaling protein serine/threonine kin…	6468 // protein amino acid phosphorylation // inferred from direct assay /// 6468 // protein amino acid phosphorylation // non-traceable author statement /// 7398 // ectoderm development // inferred from electronic annotation /// 7399 // nervous system development // inferred from electronic annotation /// 30036 // actin cytoskeleton organization and biogenesis // non-traceable author statement /…	5737 // cytoplasm // inferred from direct assay /// 5826 // contractile ring // inferred from direct assay /// 5938 // cell cortex // inferred from direct assay	IPR001478 // PDZ/DHR/GLGF domain // 2.3E-8 /// IPR001781 // Zn-binding protein, LIM // 1.9E-16 /// IPR001781 // Zn-binding protein, LIM // 4.9E-17 /// IPR000719 // Protein kinase // 3.2E-61 /// IPR001478 // PDZ/DHR/GLGF domain // 2.3E-8 /// IPR000719 // Protein kinase // 3.2E-61 /// IPR001478 // PDZ/DHR/GLGF domain // 2.3E-8 /// IPR000719 // Protein kinase // 3.2E-61
463	141662_at	0.735516	2.60632	10.4787	8.75e-12	2.05e-10	16.6822	---	CG31732	---	---	---	---	---	---	---
9847	151046_at	0.734777	-0.159002	10.6814	5.44e-12	1.34e-10	17.1613	FBgn0038226	CG31319	RhoGAP88C	RhoGAP88C	41749	5100 // Rho GTPase activator activity // inferred from sequence or structural similarity /// 5100 // Rho GTPase activator activity // inferred from sequence similarity	7242 // intracellular signaling cascade // inferred from electronic annotation	---	IPR002913 // Lipid-binding START // 1.6E-24 /// IPR000198 // RhoGAP domain // 7.8E-55
13940	155139_at	0.733003	4.11606	2.32601	0.0266307	0.042286	-4.96456	FBgn0036837	CG18135	CG18135	CG18135	40073	5515 // protein binding // inferred from physical interaction /// 3824 // catalytic activity // inferred from electronic annotation /// 4629 // phospholipase C activity // inferred from electronic annotation /// 8889 // glycerophosphodiester phosphodiesterase activity // inferred from electronic annotation	5975 // carbohydrate metabolism // inferred from electronic annotation /// 6071 // glycerol metabolism // inferred from electronic annotation /// 7165 // signal transduction // inferred from electronic annotation /// 7242 // intracellular signaling cascade // inferred from electronic annotation	---	IPR004129 // Glycerophosphoryl diester phosphodiesterase // 1.4E-56 /// IPR004129 // Glycerophosphoryl diester phosphodiesterase // 1.4E-56 /// IPR004129 // Glycerophosphoryl diester phosphodiesterase // 1.4E-56 /// IPR004129 // Glycerophosphoryl diester phosphodiesterase // 1.4E-56
10040	151239_at	0.73293	0.244967	10.0754	2.28e-11	4.72e-10	15.7128	FBgn0040766	CG13235	CG13235	CG13235	50239	---	---	---	---
881	142080_at	0.731176	-0.553201	11.4713	9.01e-13	2.7e-11	18.9784	---	---	---	---	---	---	---	---	---
13685	154884_at	0.731151	2.90533	6.65162	1.82e-07	1.12e-06	6.6543	FBgn0035763	CG8602	CG8602	CG8602	38808	5215 // transporter activity // inferred from electronic annotation	6810 // transport // inferred from electronic annotation /// 6811 // ion transport // inferred from electronic annotation /// 6812 // cation transport // inferred from electronic annotation /// 6858 // extracellular transport // inferred from electronic annotation	16021 // integral to membrane // inferred from electronic annotation /// 16020 // membrane // inferred from electronic annotation	---
9234	150433_at	0.730191	-0.0154877	9.41547	1.15e-10	1.92e-09	14.0804	FBgn0000338	CG17894	cnc	cap-n-collar	42743	3677 // DNA binding // inferred from mutant phenotype /// 3700 // transcription factor activity // traceable author statement /// 3702 // RNA polymerase II transcription factor activity // non-traceable author statement /// 16563 // transcriptional activator activity // traceable author statement /// 46982 // protein heterodimerization activity // inferred from sequence or structural similarity /…	6357 // regulation of transcription from RNA polymerase II promoter // inferred from electronic annotation /// 6950 // response to stress // inferred from electronic annotation /// 6952 // defense response // inferred from electronic annotation /// 7310 // oocyte dorsal/ventral axis determination // inferred from mutant phenotype /// 7317 // regulation of pole plasm oskar mRNA localization // inf…	5634 // nucleus // inferred from direct assay /// 5634 // nucleus // non-traceable author statement /// 5740 // mitochondrial envelope // inferred from direct assay /// 5739 // mitochondrion // inferred from electronic annotation /// 5741 // mitochondrial outer membrane // inferred from electronic annotation /// 16020 // membrane // inferred from electronic annotation /// 16021 // integral to mem…	---
6789	147988_at	0.729434	2.16673	5.1478	1.35e-05	4.85e-05	2.34584	---	CG18170 /// CG33791	---	---	---	4591 // oxoglutarate dehydrogenase (succinyl-transferring) activity // inferred from sequence or structural similarity /// 4591 // oxoglutarate dehydrogenase (succinyl-transferring) activity // inferred from electronic annotation /// 30976 // thiamin pyrophosphate binding // inferred from electronic annotation /// 16624 // oxidoreductase activity, acting on the aldehyde or oxo group of donors, di…	6099 // tricarboxylic acid cycle // inferred from sequence or structural similarity /// 6096 // glycolysis // inferred from electronic annotation /// 8152 // metabolism // inferred from electronic annotation	9353 // oxoglutarate dehydrogenase complex (sensu Eukaryota) // inferred from sequence or structural similarity	---
4971	146170_at	0.729021	2.57261	4.08943	0.000278945	0.000722236	-0.637926	FBgn0032269	CG7363	CG7363	CG7363	34455	---	---	---	---
6298	147497_at	0.728946	3.37849	6.47649	2.98e-07	1.72e-06	6.15716	FBgn0034443	CG10460	cer	crammer	37229	4869 // cysteine protease inhibitor activity // inferred from direct assay	7616 // long-term memory // inferred from mutant phenotype	---	---
2381	143580_at	0.728719	2.73921	6.34352	4.35e-07	2.37e-06	5.77831	FBgn0010051	CG1063	Itp-r83A	Inositol 1,4,5,-tris-phosphate receptor	40664	5220 // inositol 1,4,5-triphosphate-sensitive calcium-release channel activity // inferred from electronic annotation /// 5262 // calcium channel activity // non-traceable author statement /// 8095 // inositol-1,4,5-triphosphate receptor activity // inferred from direct assay /// 8095 // inositol-1,4,5-triphosphate receptor activity // inferred from sequence or structural similarity /// 8095 // i…	6812 // cation transport // inferred from electronic annotation /// 6816 // calcium ion transport // inferred from electronic annotation /// 6979 // response to oxidative stress // inferred from mutant phenotype /// 7186 // G-protein coupled receptor protein signaling pathway // inferred from electronic annotation /// 7591 // molting cycle (sensu Insecta) // inferred from genetic interaction /// …	5789 // endoplasmic reticulum membrane // non-traceable author statement /// 5783 // endoplasmic reticulum // inferred from electronic annotation /// 16020 // membrane // inferred from electronic annotation /// 16021 // integral to membrane // inferred from electronic annotation	IPR005821 // Ion transport protein // 4.1E-16 /// IPR003608 // MIR domain // 5.0E-6 /// IPR003608 // MIR domain // 9.6E-6 /// IPR003608 // MIR domain // 1.3E-8 /// IPR003608 // MIR domain // 4.3E-16 /// IPR000699 // Intracellular calcium-release channel // 2.9E-99 /// IPR000699 // Intracellular calcium-release channel // 2.0E-82 /// IPR005821 // Ion transport protein // 4.1E-16 /// IPR000699 // I…
11393	152592_at	0.727653	1.60906	6.98663	7.1e-08	5.01e-07	7.59864	FBgn0000581	CG7776	E(Pc)	Enhancer of Polycomb	36238	4402 // histone acetyltransferase activity // inferred from direct assay	6325 // establishment and/or maintenance of chromatin architecture // inferred from mutant phenotype /// 16573 // histone acetylation // inferred from direct assay /// 43486 // histone exchange // inferred from direct assay	785 // chromatin // non-traceable author statement /// 5700 // polytene chromosome // inferred from direct assay /// 5701 // polytene chromosome chromocenter // inferred from direct assay /// 5725 // intercalary heterochromatin // non-traceable author statement /// 35267 // TIP60 histone acetyltransferase complex // inferred from direct assay	---
1981	143180_at	0.727533	2.08181	5.54233	4.33e-06	1.77e-05	3.47962	FBgn0001138	CG9656	grn	grain	40962	3700 // transcription factor activity // inferred from electronic annotation /// 3702 // RNA polymerase II transcription factor activity // non-traceable author statement /// 16251 // general RNA polymerase II transcription factor activity // inferred from sequence or structural similarity /// 16251 // general RNA polymerase II transcription factor activity // non-traceable author statement /// 3…	6357 // regulation of transcription from RNA polymerase II promoter // inferred from sequence or structural similarity /// 7498 // mesoderm development // inferred from electronic annotation /// 9887 // organ morphogenesis // inferred from mutant phenotype /// 9887 // organ morphogenesis // non-traceable author statement /// 9888 // tissue development // inferred from mutant phenotype /// 9888 //…	5634 // nucleus // inferred from sequence or structural similarity /// 5634 // nucleus // non-traceable author statement /// 5634 // nucleus // inferred from electronic annotation /// 5634 // nucleus // inferred from sequence similarity	IPR000679 // Zn-finger, GATA type // 2.5E-21 /// IPR000679 // Zn-finger, GATA type // 4.2E-21
10233	151432_at	0.727524	-0.846181	10.5003	8.32e-12	1.95e-10	16.7333	FBgn0040971	CG15494	CG15494	CG15494	50445	---	---	---	---
12656	153855_at	0.727397	1.63277	11.563	7.35e-13	2.27e-11	19.1842	FBgn0023214	CG15085	edl	ETS-domain lacking	37149	3677 // DNA binding // inferred from electronic annotation /// 5515 // protein binding // inferred from physical interaction /// 43565 // sequence-specific DNA binding // inferred from electronic annotation	6355 // regulation of transcription, DNA-dependent // inferred from physical interaction /// 7423 // sensory organ development // inferred from mutant phenotype /// 9880 // embryonic pattern specification // inferred from mutant phenotype /// 16481 // negative regulation of transcription // inferred from genetic interaction /// 42058 // regulation of epidermal growth factor receptor signaling pat…	5634 // nucleus // inferred from electronic annotation	IPR003118 // Sterile alpha motif (SAM)/Pointed domain // 2.3E-9
10139	151338_at	0.726609	-0.506313	10.9773	2.75e-12	7.28e-11	17.8514	---	---	---	---	---	---	---	---	---
1747	142946_at	0.725804	2.18	8.83263	5.02e-10	6.97e-09	12.5912	FBgn0020129	CG12240	DnaJ-60	DnaJ-like-60	37869	51082 // unfolded protein binding // inferred from sequence or structural similarity /// 31072 // heat shock protein binding // inferred from electronic annotation /// 51082 // unfolded protein binding // inferred from sequence similarity	6457 // protein folding // inferred from sequence or structural similarity /// 7283 // spermatogenesis // non-traceable author statement /// 6457 // protein folding // inferred from sequence similarity	---	IPR001623 // Heat shock protein DnaJ, N-terminal // 2.0E-21
8496	149695_at	0.72551	1.4796	6.57362	2.26e-07	1.36e-06	6.43314	FBgn0037921	CG6808	CG6808	CG6808	41394	3676 // nucleic acid binding // inferred from electronic annotation /// 8270 // zinc ion binding // inferred from electronic annotation /// 30528 // transcription regulator activity // inferred from electronic annotation /// 46872 // metal ion binding // inferred from electronic annotation	6139 // nucleobase, nucleoside, nucleotide and nucleic acid metabolism // inferred from electronic annotation /// 6357 // regulation of transcription from RNA polymerase II promoter // inferred from electronic annotation /// 6366 // transcription from RNA polymerase II promoter // inferred from electronic annotation /// 8283 // cell proliferation // inferred from electronic annotation	5634 // nucleus // inferred from electronic annotation	IPR007087 // Zn-finger, C2H2 type // 8.6E-6 /// IPR007087 // Zn-finger, C2H2 type // 1.4E-4
12167	153366_at	0.725418	3.64248	5.34433	7.67e-06	2.94e-05	2.91017	FBgn0036316	CG10960	CG10960	CG10960	39458	5351 // sugar porter activity // inferred from electronic annotation /// 5355 // glucose transporter activity // inferred from sequence or structural similarity /// 5215 // transporter activity // inferred from electronic annotation /// 5355 // glucose transporter activity // inferred from sequence similarity	5975 // carbohydrate metabolism // inferred from electronic annotation /// 8643 // carbohydrate transport // inferred from electronic annotation /// 6810 // transport // inferred from electronic annotation	16020 // membrane // inferred from electronic annotation /// 16021 // integral to membrane // inferred from electronic annotation	IPR005828 // General substrate transporter // 6.2E-93 /// IPR005828 // General substrate transporter // 6.2E-93
10429	151628_at	0.725081	1.80933	6.3857	3.86e-07	2.15e-06	5.89861	FBgn0033984	CG10255	Lap1	Lap1	36670	4016 // adenylate cyclase activity // inferred from electronic annotation /// 4675 // transmembrane receptor protein serine/threonine kinase activity // inferred from electronic annotation /// 5515 // protein binding // inferred from electronic annotation /// 17016 // Ras GTPase binding // inferred from sequence or structural similarity /// 5515 // protein binding // inferred from physical intera…	6468 // protein amino acid phosphorylation // inferred from electronic annotation /// 6952 // defense response // inferred from electronic annotation /// 7155 // cell adhesion // inferred from electronic annotation /// 7163 // establishment and/or maintenance of cell polarity // inferred from sequence or structural similarity /// 7163 // establishment and/or maintenance of cell polarity // non-tr…	5912 // adherens junction // inferred from sequence or structural similarity /// 5912 // adherens junction // inferred from sequence similarity	IPR001478 // PDZ/DHR/GLGF domain // 4.0E-7 /// IPR001611 // Leucine-rich repeat // 0.067 /// IPR001611 // Leucine-rich repeat // 0.0075 /// IPR001611 // Leucine-rich repeat // 5.4E-4 /// IPR001611 // Leucine-rich repeat // 2.4E-4 /// IPR001611 // Leucine-rich repeat // 0.17 /// IPR001611 // Leucine-rich repeat // 0.22 /// IPR001611 // Leucine-rich repeat // 6.9E-4 /// IPR001611 // Leucine-rich re…
13627	154826_at	0.725006	2.52966	8.77137	5.87e-10	7.97e-09	12.4322	FBgn0032940	CG18362	Mio	Mlx interactor	35402	3700 // transcription factor activity // inferred from sequence or structural similarity /// 3700 // transcription factor activity // non-traceable author statement /// 5515 // protein binding // inferred from physical interaction /// 30528 // transcription regulator activity // inferred from electronic annotation /// 3700 // transcription factor activity // inferred from sequence similarity	45449 // regulation of transcription // inferred from sequence or structural similarity /// 7275 // development // inferred from electronic annotation /// 30154 // cell differentiation // inferred from electronic annotation /// 45449 // regulation of transcription // inferred from electronic annotation /// 45449 // regulation of transcription // inferred from sequence similarity	5634 // nucleus // inferred from sequence or structural similarity /// 5634 // nucleus // inferred from electronic annotation /// 5634 // nucleus // inferred from sequence similarity	IPR001092 // Basic helix-loop-helix dimerization domain bHLH // 2.1E-16 /// IPR001092 // Basic helix-loop-helix dimerization domain bHLH // 2.1E-16 /// IPR001092 // Basic helix-loop-helix dimerization domain bHLH // 2.1E-16 /// IPR001092 // Basic helix-loop-helix dimerization domain bHLH // 2.1E-16
9899	151098_at	0.72456	-0.937786	10.1166	2.07e-11	4.32e-10	15.8127	FBgn0016061	CG31062	side	sidestep	43300	---	7165 // signal transduction // inferred from electronic annotation /// 8045 // motor axon guidance // inferred from mutant phenotype /// 16337 // cell-cell adhesion // inferred from electronic annotation	---	IPR003961 // Fibronectin, type III // 8.5E-6 /// IPR007110 // Immunoglobulin-like // 4.3E-8 /// IPR007110 // Immunoglobulin-like // 0.016 /// IPR007110 // Immunoglobulin-like // 5.1E-6 /// IPR007110 // Immunoglobulin-like // 1.1E-5
10231	151430_at	0.724304	-0.235383	11.694	5.5e-13	1.78e-11	19.4764	---	---	---	---	---	---	---	---	---
4525	145724_at	0.723473	-0.70632	12.5072	9.55e-14	3.91e-12	21.2435	---	---	---	---	---	---	---	---	---
12144	153343_at	0.722212	1.175	4.97052	2.26e-05	7.66e-05	1.83825	FBgn0039509	CG3350	bigmax	bigmax	43293	3700 // transcription factor activity // inferred from sequence or structural similarity /// 3700 // transcription factor activity // non-traceable author statement /// 5515 // protein binding // inferred from physical interaction /// 30528 // transcription regulator activity // inferred from electronic annotation /// 3700 // transcription factor activity // inferred from sequence similarity	6350 // transcription // non-traceable author statement /// 6357 // regulation of transcription from RNA polymerase II promoter // inferred from electronic annotation /// 35071 // salivary gland cell autophagic cell death // inferred from expression pattern /// 45449 // regulation of transcription // inferred from sequence or structural similarity /// 48102 // autophagic cell death // inferred fr…	5634 // nucleus // inferred from sequence or structural similarity /// 5634 // nucleus // non-traceable author statement /// 5634 // nucleus // inferred from electronic annotation /// 5634 // nucleus // inferred from sequence similarity	IPR001092 // Basic helix-loop-helix dimerization domain bHLH // 2.3E-17
9966	151165_r_at	0.720663	-1.2266	6.56848	2.3e-07	1.38e-06	6.41857	FBgn0040688	CG12483	CG12483	CG12483	50161	---	---	---	---
6778	147977_at	0.720381	-0.271192	9.01267	3.17e-10	4.68e-09	13.056	FBgn0003138	CG9181	Ptp61F	Protein tyrosine phosphatase 61F	38160	4725 // protein tyrosine phosphatase activity // inferred from direct assay /// 4725 // protein tyrosine phosphatase activity // inferred from sequence or structural similarity /// 4725 // protein tyrosine phosphatase activity // non-traceable author statement /// 4872 // receptor activity // inferred from electronic annotation /// 5515 // protein binding // inferred from physical interaction ///…	6470 // protein amino acid dephosphorylation // inferred from direct assay /// 6470 // protein amino acid dephosphorylation // non-traceable author statement /// 7165 // signal transduction // inferred from electronic annotation /// 7377 // germ-band extension // inferred from direct assay /// 7411 // axon guidance // inferred from physical interaction /// 9993 // oogenesis (sensu Insecta) // inf…	5634 // nucleus // inferred from direct assay /// 5737 // cytoplasm // inferred from direct assay /// 5740 // mitochondrial envelope // inferred from direct assay /// 5634 // nucleus // inferred from electronic annotation	IPR000242 // Tyrosine specific protein phosphatase // 2.3E-105
2338	143537_at	0.720101	1.68825	9.02417	3.08e-10	4.58e-09	13.0855	FBgn0004919	CG2679	gol	goliath	38006	4842 // ubiquitin-protein ligase activity // inferred from electronic annotation /// 8233 // peptidase activity // inferred from electronic annotation /// 8270 // zinc ion binding // inferred from electronic annotation /// 30528 // transcription regulator activity // inferred from electronic annotation /// 30528 // transcription regulator activity // inferred from expression pattern /// 3677 // D…	1707 // mesoderm formation // inferred from expression pattern /// 6355 // regulation of transcription, DNA-dependent // non-traceable author statement /// 6366 // transcription from RNA polymerase II promoter // inferred from electronic annotation /// 6508 // proteolysis // inferred from electronic annotation /// 7498 // mesoderm development // non-traceable author statement /// 16567 // protein…	151 // ubiquitin ligase complex // inferred from electronic annotation /// 5634 // nucleus // non-traceable author statement /// 16020 // membrane // inferred from electronic annotation /// 16021 // integral to membrane // inferred from electronic annotation	IPR001841 // Zn-finger, RING // 6.3E-14
10444	151643_at	0.719191	1.34585	7.87486	6.22e-09	6.23e-08	10.0501	FBgn0003254	CG7230	rib	ribbon	44855	3677 // DNA binding // non-traceable author statement /// 3700 // transcription factor activity // traceable author statement /// 5515 // protein binding // inferred from electronic annotation /// 5515 // protein binding // inferred from physical interaction /// 3677 // DNA binding // inferred from electronic annotation /// 3700 // transcription factor activity // inferred from electronic annotat…	6355 // regulation of transcription, DNA-dependent // inferred from electronic annotation /// 7010 // cytoskeleton organization and biogenesis // traceable author statement /// 7391 // dorsal closure // inferred from mutant phenotype /// 7391 // dorsal closure // non-traceable author statement /// 7391 // dorsal closure // traceable author statement /// 7417 // central nervous system development …	5634 // nucleus // inferred from direct assay /// 5634 // nucleus // non-traceable author statement /// 5634 // nucleus // traceable author statement /// 5634 // nucleus // inferred from electronic annotation	IPR000210 // BTB/POZ domain // 7.4E-21 /// IPR007889 // Helix-turn-helix, Psq // 5.8E-18
10449	151648_at	0.718167	2.69656	9.15805	2.19e-10	3.41e-09	13.4282	FBgn0025866	CG8107	CalpB	Calpain-B	39165	4198 // calpain activity // inferred from direct assay /// 4198 // calpain activity // non-traceable author statement /// 5509 // calcium ion binding // inferred from electronic annotation /// 5509 // calcium ion binding // non-traceable author statement /// 5516 // calmodulin binding // inferred from electronic annotation /// 5515 // protein binding // inferred from physical interaction /// 4197…	6508 // proteolysis // inferred from direct assay /// 6508 // proteolysis // inferred from electronic annotation /// 16540 // protein autoprocessing // traceable author statement	5622 // intracellular // inferred from electronic annotation /// 5737 // cytoplasm // inferred from direct assay /// 5737 // cytoplasm // non-traceable author statement /// 16020 // membrane // inferred from direct assay /// 16020 // membrane // inferred from electronic annotation	IPR001300 // Peptidase C2, calpain // 1.0E-126 /// IPR002048 // Calcium-binding EF-hand // 1.2E-5 /// IPR002048 // Calcium-binding EF-hand // 0.16 /// IPR001300 // Peptidase C2, calpain // 1.0E-99
10587	151786_at	0.716487	2.20717	6.37923	3.93e-07	2.18e-06	5.88016	FBgn0027375	CG4879	RecQ5	homolog of RecQ	39594	3676 // nucleic acid binding // inferred from electronic annotation /// 3678 // DNA helicase activity // inferred from sequence or structural similarity /// 3924 // GTPase activity // inferred from direct assay /// 4003 // ATP-dependent DNA helicase activity // inferred from sequence or structural similarity /// 4386 // helicase activity // inferred from sequence or structural similarity /// 5524…	6260 // DNA replication // inferred from electronic annotation /// 6310 // DNA recombination // inferred from electronic annotation /// 6259 // DNA metabolism // inferred from electronic annotation	---	IPR001650 // Helicase, C-terminal // 1.5E-26 /// IPR001410 // DEAD/DEAH box helicase // 4.2E-34
8460	149659_at	0.71546	2.25403	6.21452	6.28e-07	3.27e-06	5.40983	FBgn0037857	CG4683	CG4683	CG4683	41321	3676 // nucleic acid binding // inferred from electronic annotation /// 4519 // endonuclease activity // inferred from sequence or structural similarity /// 4520 // endodeoxyribonuclease activity // inferred from electronic annotation /// 4521 // endoribonuclease activity // inferred from electronic annotation /// 4519 // endonuclease activity // inferred from electronic annotation /// 4519 // en…	6260 // DNA replication // inferred from electronic annotation	---	IPR001604 // DNA/RNA non-specific endonuclease // 1.9E-27
754	141953_at	0.713206	0.914003	8.13044	3.14e-09	3.47e-08	10.7392	---	---	---	---	---	---	---	---	---
8098	149297_at	0.71228	1.75705	5.4824	5.15e-06	2.06e-05	3.30721	---	---	---	---	---	---	---	---	---
10017	151216_at	0.711749	-0.317216	10.2698	1.43e-11	3.18e-10	16.1827	FBgn0040740	CG14494	CG14494	CG14494	50213	---	---	---	---
10966	152165_at	0.711205	2.719	6.31158	4.76e-07	2.57e-06	5.68716	FBgn0025702	CG11489	CG11489	CG11489	40461	4672 // protein kinase activity // inferred from sequence or structural similarity /// 4672 // protein kinase activity // non-traceable author statement /// 4674 // protein serine/threonine kinase activity // inferred from sequence or structural similarity /// 4702 // receptor signaling protein serine/threonine kinase activity // inferred from electronic annotation /// 5524 // ATP binding // infe…	6468 // protein amino acid phosphorylation // non-traceable author statement /// 6468 // protein amino acid phosphorylation // inferred from electronic annotation	---	IPR000719 // Protein kinase // 1.2E-27 /// IPR000719 // Protein kinase // 7.6E-18 /// IPR000719 // Protein kinase // 1.2E-27 /// IPR000719 // Protein kinase // 7.6E-18
13900	155099_at	0.710106	1.49651	5.64068	3.26e-06	1.38e-05	3.76257	FBgn0000180	CG4722	bib	big brain	34330	5386 // carrier activity // inferred from electronic annotation /// 5488 // binding // inferred from electronic annotation /// 15250 // water channel activity // inferred from sequence or structural similarity /// 15281 // nonselective cation channel activity // inferred from direct assay /// 5215 // transporter activity // inferred from electronic annotation /// 5216 // ion channel activity // i…	6810 // transport // inferred from electronic annotation /// 7219 // Notch signaling pathway // non-traceable author statement /// 7398 // ectoderm development // traceable author statement /// 7399 // nervous system development // non-traceable author statement /// 7498 // mesoderm development // inferred from mutant phenotype /// 19725 // cell homeostasis // inferred from electronic annotation …	5887 // integral to plasma membrane // non-traceable author statement /// 16021 // integral to membrane // inferred from sequence or structural similarity /// 16020 // membrane // inferred from electronic annotation /// 16021 // integral to membrane // inferred from electronic annotation /// 16021 // integral to membrane // inferred from sequence similarity	IPR000425 // Major intrinsic protein // 3.0E-118
4275	145474_at	0.709815	5.95169	5.69449	2.79e-06	1.2e-05	3.91736	FBgn0031176	CG1678	CG1678	CG1678	33121	---	---	---	---
5466	146665_at	0.709594	-0.809462	12.3866	1.23e-13	4.9e-12	20.9866	FBgn0033052	CG33131	SCAP	SCAP	35529	---	42 // protein targeting to Golgi // non-traceable author statement /// 16485 // protein processing // non-traceable author statement /// 35103 // sterol regulatory element binding-protein cleavage // inferred from sequence or structural similarity /// 35103 // sterol regulatory element binding-protein cleavage // non-traceable author statement /// 35103 // sterol regulatory element binding-protei…	5795 // Golgi stack // inferred from electronic annotation /// 16021 // integral to membrane // inferred from electronic annotation	IPR001680 // G-protein beta WD-40 repeat // 1.7E-5 /// IPR001680 // G-protein beta WD-40 repeat // 0.014 /// IPR001680 // G-protein beta WD-40 repeat // 1.4E-5 /// IPR001680 // G-protein beta WD-40 repeat // 1.1E-5 /// IPR001680 // G-protein beta WD-40 repeat // 5.0E-7
2935	144134_at	0.709178	0.44953	6.97579	7.32e-08	5.14e-07	7.56825	FBgn0026392	CG16960	Or33a	Odorant receptor 33a	34601	4984 // olfactory receptor activity // inferred from sequence or structural similarity /// 5549 // odorant binding // inferred from electronic annotation /// 4984 // olfactory receptor activity // inferred from sequence similarity	7186 // G-protein coupled receptor protein signaling pathway // inferred from electronic annotation /// 7267 // cell-cell signaling // inferred from electronic annotation /// 7608 // sensory perception of smell // inferred from sequence or structural similarity /// 7608 // sensory perception of smell // inferred from sequence similarity	16021 // integral to membrane // inferred from sequence or structural similarity /// 16021 // integral to membrane // inferred from sequence similarity	IPR004117 // Olfactory receptor, Drosophila // 4.1E-111
2582	143781_at	0.708823	2.24211	7.12319	4.85e-08	3.61e-07	7.98077	FBgn0015035	CG4105	Cyp4e3	Cytochrome P450-4e3	34291	4497 // monooxygenase activity // inferred from electronic annotation /// 16491 // oxidoreductase activity // inferred from electronic annotation /// 5506 // iron ion binding // inferred from electronic annotation /// 20037 // heme binding // inferred from electronic annotation /// 46872 // metal ion binding // inferred from electronic annotation	6118 // electron transport // inferred from electronic annotation /// 8202 // steroid metabolism // inferred from electronic annotation	5792 // microsome // non-traceable author statement /// 16020 // membrane // non-traceable author statement /// 5783 // endoplasmic reticulum // inferred from electronic annotation /// 5792 // microsome // inferred from electronic annotation /// 16020 // membrane // inferred from electronic annotation	IPR001128 // Cytochrome P450 // 3.7E-94 /// IPR001128 // Cytochrome P450 // 5.6E-76
9940	151139_at	0.70866	-0.654571	9.17835	2.08e-10	3.25e-09	13.4799	FBgn0034609	---	Rgk3	Rgk3	37425	5525 // GTP binding // inferred from sequence or structural similarity /// 16818 // hydrolase activity, acting on acid anhydrides, in phosphorus-containing anhydrides // inferred from electronic annotation /// 5525 // GTP binding // inferred from electronic annotation /// 5525 // GTP binding // inferred from sequence similarity	7264 // small GTPase mediated signal transduction // inferred from electronic annotation	---	IPR001806 // Ras GTPase superfamily // 1.4E-11
2431	143630_at	0.708491	0.167473	9.25343	1.72e-10	2.74e-09	13.6709	---	---	---	---	---	166 // nucleotide binding // inferred from electronic annotation /// 5524 // ATP binding // inferred from electronic annotation /// 16887 // ATPase activity // inferred from electronic annotation /// 17111 // nucleoside-triphosphatase activity // inferred from electronic annotation /// 42626 // ATPase activity, coupled to transmembrane movement of substances // inferred from electronic annotation…	7275 // development // inferred from mutant phenotype /// 6810 // transport // inferred from electronic annotation /// 7275 // development // inferred from electronic annotation /// 6810 // transport // non-traceable author statement	16020 // membrane // inferred from electronic annotation /// 16021 // integral to membrane // inferred from electronic annotation /// 16021 // integral to membrane // non-traceable author statement	---
9174	150373_at	0.708167	3.6146	6.47836	2.96e-07	1.72e-06	6.16248	FBgn0038979	CG7046	CG7046	CG7046	42651	3677 // DNA binding // inferred from sequence or structural similarity /// 3677 // DNA binding // inferred from electronic annotation /// 3677 // DNA binding // inferred from sequence similarity	6355 // regulation of transcription, DNA-dependent // inferred from electronic annotation	785 // chromatin // inferred from sequence or structural similarity /// 5634 // nucleus // inferred from sequence or structural similarity /// 785 // chromatin // inferred from electronic annotation /// 5634 // nucleus // inferred from electronic annotation /// 785 // chromatin // inferred from sequence similarity /// 5634 // nucleus // inferred from sequence similarity	IPR000910 // HMG1/2 (high mobility group) box // 9.2E-24
12644	153843_at	0.707078	2.79845	7.75243	8.66e-09	8.23e-08	9.71726	FBgn0026620	CG9765	tacc	transforming acidic coiled-coil protein	40589	5515 // protein binding // inferred from physical interaction /// 8017 // microtubule binding // traceable author statement	226 // microtubule cytoskeleton organization and biogenesis // inferred from mutant phenotype /// 7026 // negative regulation of microtubule depolymerization // non-traceable author statement /// 7026 // negative regulation of microtubule depolymerization // traceable author statement /// 7052 // mitotic spindle organization and biogenesis // traceable author statement /// 7067 // mitosis // infe…	235 // astral microtubule // traceable author statement /// 242 // pericentriolar material // non-traceable author statement /// 5813 // centrosome // inferred from direct assay /// 5813 // centrosome // traceable author statement /// 5876 // spindle microtubule // traceable author statement	NULL // NULL // 8.0E-125 /// NULL // NULL // 8.0E-125 /// NULL // NULL // 8.0E-125 /// NULL // NULL // 8.0E-125 /// NULL // NULL // 8.0E-125
3820	145019_at	0.706691	1.00873	8.15597	2.94e-09	3.27e-08	10.8076	FBgn0030501	CG11177	BthD	BthD selenoprotein	32317	8430 // selenium binding // inferred from electronic annotation	6980 // redox signal response // non-traceable author statement /// 7432 // salivary gland determination // inferred from direct assay /// 8340 // determination of adult life span // inferred from direct assay /// 9790 // embryonic development // inferred from direct assay /// 7275 // development // inferred from electronic annotation /// 45454 // cell redox homeostasis // inferred from electroni…	5737 // cytoplasm // inferred from direct assay	---
10447	151646_at	0.706321	1.23842	6.19183	6.7e-07	3.45e-06	5.3449	FBgn0051258	CG31258	CG31258	CG31258	41014	3677 // DNA binding // inferred from electronic annotation	6355 // regulation of transcription, DNA-dependent // inferred from electronic annotation	5634 // nucleus // inferred from electronic annotation	---
10452	151651_at	0.706064	1.0333	6.31011	4.78e-07	2.57e-06	5.68297	FBgn0028999	CG13906	nerfin-1	nervous fingers 1	44786	3676 // nucleic acid binding // inferred from electronic annotation /// 3702 // RNA polymerase II transcription factor activity // inferred from sequence or structural similarity /// 8270 // zinc ion binding // inferred from electronic annotation /// 5515 // protein binding // inferred from physical interaction /// 46872 // metal ion binding // inferred from electronic annotation /// 3702 // RNA …	6357 // regulation of transcription from RNA polymerase II promoter // inferred from sequence or structural similarity /// 7411 // axon guidance // inferred from mutant phenotype /// 42055 // neuron lineage restriction // inferred from direct assay /// 6357 // regulation of transcription from RNA polymerase II promoter // inferred from sequence similarity	5634 // nucleus // inferred from sequence or structural similarity /// 5634 // nucleus // inferred from electronic annotation /// 5634 // nucleus // inferred from sequence similarity	IPR007087 // Zn-finger, C2H2 type // 3.5E-5 /// IPR007087 // Zn-finger, C2H2 type // 1.4E-6
2830	144029_at	0.70584	1.0064	10.3604	1.16e-11	2.63e-10	16.4	FBgn0024912	CG1303	agt	O-6-alkylguanine-DNA alkyltransferase	40816	3676 // nucleic acid binding // inferred from electronic annotation /// 3908 // methylated-DNA-[protein]-cysteine S-methyltransferase activity // inferred from direct assay /// 3908 // methylated-DNA-[protein]-cysteine S-methyltransferase activity // inferred from sequence or structural similarity /// 3908 // methylated-DNA-[protein]-cysteine S-methyltransferase activity // non-traceable author s…	6259 // DNA metabolism // inferred from electronic annotation /// 6281 // DNA repair // inferred from electronic annotation /// 6307 // DNA dealkylation // inferred from direct assay	---	IPR001497 // Methylated-DNA-[protein]-cysteine S-methyltransferase // 2.2E-31
7369	148568_at	0.705824	0.816197	9.27465	1.63e-10	2.61e-09	13.7247	FBgn0036152	CG6175	CG6175	CG6175	39271	---	---	---	---
13424	154623_at	0.705653	2.06592	4.01403	0.00034456	0.000873874	-0.844159	FBgn0029865	CG15893	CG15893	CG15893	31575	5515 // protein binding // inferred from physical interaction	---	---	---
5981	147180_at	0.705453	-0.58634	10.1314	2e-11	4.2e-10	15.8486	FBgn0020620	CG8085	RN-tre	tre oncogene-related protein	36554	8233 // peptidase activity // inferred from electronic annotation /// 8234 // cysteine-type peptidase activity // inferred from electronic annotation	6508 // proteolysis // inferred from electronic annotation /// 7155 // cell adhesion // inferred from electronic annotation /// 19538 // protein metabolism // inferred from electronic annotation	---	IPR000195 // RabGAP/TBC domain // 1.2E-17 /// IPR000195 // RabGAP/TBC domain // 1.1E-9 /// IPR000195 // RabGAP/TBC domain // 1.1E-9
10555	151754_at	0.7043	3.52406	5.28153	9.2e-06	3.44e-05	2.72969	FBgn0020254	CG6831	rhea	rhea	38978	3779 // actin binding // inferred from sequence or structural similarity /// 5200 // structural constituent of cytoskeleton // inferred from electronic annotation /// 3779 // actin binding // inferred from electronic annotation /// 5488 // binding // inferred from electronic annotation /// 3779 // actin binding // inferred from sequence similarity	6886 // intracellular protein transport // inferred from electronic annotation /// 6928 // cell motility // inferred from electronic annotation /// 6952 // defense response // inferred from electronic annotation /// 7016 // cytoskeletal anchoring // inferred from sequence or structural similarity /// 7155 // cell adhesion // inferred from mutant phenotype /// 7155 // cell adhesion // traceable au…	5856 // cytoskeleton // inferred from electronic annotation /// 5925 // focal adhesion // inferred from sequence or structural similarity /// 5925 // focal adhesion // inferred from sequence similarity	IPR002558 // I/LWEQ domain // 1.6E-65 /// IPR000299 // Band 4.1 // 4.2E-54
737	141936_at	0.704293	1.08625	6.56458	2.32e-07	1.39e-06	6.40748	---	---	---	---	---	---	---	---	---
10109	151308_at	0.704031	0.481723	8.04219	3.98e-09	4.23e-08	10.5022	FBgn0052365	CG32365	CG32365	CG32365	38876	---	50875 // cellular physiological process // inferred from mutant phenotype	---	---
5239	146438_at	0.703791	1.06711	5.35829	7.37e-06	2.83e-05	2.9503	FBgn0032686	CG10231	Pde11	Phosphodiesterase 11	35107	4115 // 3',5'-cyclic-AMP phosphodiesterase activity // inferred from direct assay /// 4115 // 3',5'-cyclic-AMP phosphodiesterase activity // inferred from sequence or structural similarity /// 47555 // 3',5'-cyclic-GMP phosphodiesterase activity // inferred from direct assay /// 3824 // catalytic activity // inferred from electronic annotation /// 4114 // 3',5'-cyclic-nucleotide phosphodiesterase…	7165 // signal transduction // inferred from electronic annotation /// 9187 // cyclic nucleotide metabolism // inferred from electronic annotation	---	IPR003018 // GAF // 5.3E-22 /// IPR003018 // GAF // 4.9E-20 /// IPR002073 // 35-cyclic nucleotide phosphodiesterase // 1.2E-105 /// IPR003018 // GAF // 5.3E-22 /// IPR003018 // GAF // 4.9E-20 /// IPR002073 // 35-cyclic nucleotide phosphodiesterase // 1.2E-105
4901	146100_at	0.702675	0.972019	5.89119	1.59e-06	7.32e-06	4.48283	FBgn0032140	CG13117	CG13117	CG13117	34289	5515 // protein binding // inferred from physical interaction	---	---	---
3270	144469_i_at	0.70266	-0.223414	8.93741	3.84e-10	5.52e-09	12.8622	FBgn0052774	CG32774	CG32774	CG32774	31368	---	---	---	---
1833	143032_at	0.702237	0.418317	8.68482	7.34e-10	9.75e-09	12.2066	---	---	---	---	---	---	---	---	---
10303	151502_r_at	0.701073	1.25859	5.81017	2e-06	8.98e-06	4.25	FBgn0004583	CG4114	ex	expanded	33218	5488 // binding // inferred from electronic annotation	7165 // signal transduction // non-traceable author statement /// 7444 // imaginal disc development // non-traceable author statement /// 42127 // regulation of cell proliferation // non-traceable author statement /// 45571 // negative regulation of imaginal disc growth // traceable author statement /// 7275 // development // inferred from electronic annotation	5856 // cytoskeleton // inferred from electronic annotation /// 5915 // zonula adherens // traceable author statement /// 16324 // apical plasma membrane // traceable author statement	IPR000299 // Band 4.1 // 7.7E-11
13349	154548_at	0.700955	1.9369	7.43927	2.03e-08	1.71e-07	8.85828	FBgn0034098	CG15707	CG15707	CG15707	36804	3676 // nucleic acid binding // inferred from electronic annotation	---	---	IPR008191 // Maternal tudor protein // 3.7E-23
5844	147043_at	0.70001	1.37593	5.69691	2.77e-06	1.2e-05	3.92432	FBgn0033659	CG18188	Damm	Death associated molecule related to Mch2	36266	30693 // caspase activity // inferred from direct assay /// 30693 // caspase activity // inferred from sequence or structural similarity /// 30693 // caspase activity // non-traceable author statement /// 30693 // caspase activity // traceable author statement /// 8233 // peptidase activity // inferred from electronic annotation /// 30693 // caspase activity // inferred from electronic annotation…	6508 // proteolysis // inferred from electronic annotation /// 6915 // apoptosis // inferred from genetic interaction /// 6917 // induction of apoptosis // inferred from mutant phenotype /// 7242 // intracellular signaling cascade // inferred from electronic annotation /// 12501 // programmed cell death // traceable author statement	---	IPR001309 // Caspase-1, p20 // 1.5E-60
1900	143099_i_at	0.699195	-0.0772129	4.42194	0.000108889	0.000312609	0.284218	FBgn0000279	CG1373	CecC	Cecropin C	43599	---	6961 // antibacterial humoral response (sensu Protostomia) // inferred from direct assay /// 6961 // antibacterial humoral response (sensu Protostomia) // non-traceable author statement /// 42742 // defense response to bacteria // non-traceable author statement /// 42742 // defense response to bacteria // traceable author statement /// 50829 // defense response to Gram-negative bacteria // inferr…	5576 // extracellular region // inferred from direct assay /// 5576 // extracellular region // inferred from electronic annotation	IPR000875 // Cecropin // 9.9E-20
9782	150981_at	0.699103	0.834386	6.62965	1.93e-07	1.18e-06	6.59205	FBgn0039912	CG11260	CG11260	CG11260	43801	---	---	---	IPR001584 // Integrase, catalytic domain // 6.3E-19
10120	151319_at	0.69903	1.68621	5.60021	3.66e-06	1.53e-05	3.64613	---	---	---	---	---	---	---	---	---
9190	150389_at	0.69848	0.522953	6.95735	7.7e-08	5.37e-07	7.51649	FBgn0039000	CG6954	CG6954	CG6954	42676	---	7165 // signal transduction // inferred from electronic annotation	---	IPR000159 // RA domain // 1.1E-11 /// IPR002110 // Ankyrin // 5.3 /// IPR002110 // Ankyrin // 3.9E-5
8817	150016_at	0.698013	0.376729	4.90018	2.76e-05	9.11e-05	1.63742	FBgn0044826	CG14895	Pak3	Pak3	41995	4702 // receptor signaling protein serine/threonine kinase activity // non-traceable author statement /// 5524 // ATP binding // inferred from electronic annotation /// 166 // nucleotide binding // inferred from electronic annotation /// 4672 // protein kinase activity // inferred from electronic annotation /// 4674 // protein serine/threonine kinase activity // inferred from electronic annotatio…	165 // MAPKKK cascade // inferred from electronic annotation /// 6468 // protein amino acid phosphorylation // non-traceable author statement /// 7010 // cytoskeleton organization and biogenesis // inferred from electronic annotation /// 7015 // actin filament organization // inferred from mutant phenotype /// 8283 // cell proliferation // inferred from electronic annotation /// 6468 // protein a…	---	IPR000719 // Protein kinase // 9.0E-90 /// IPR000095 // PAK-box/P21-Rho-binding // 4.0E-21 /// IPR000719 // Protein kinase // 9.0E-90
14008	AFFX-YEL018w/_at	0.696355	-0.260134	10.9096	3.21e-12	8.43e-11	17.6945	---	---	---	---	---	8565 // protein transporter activity // inferred from genetic interaction /// 3844 // 1,4-alpha-glucan branching enzyme activity // inferred from genetic interaction /// 5515 // protein binding // inferred from physical interaction /// 42802 // identical protein binding // inferred from physical interaction /// 51082 // unfolded protein binding // inferred from direct assay /// 3677 // DNA bindin…	6357 // regulation of transcription from RNA polymerase II promoter // inferred from mutant phenotype /// 9060 // aerobic respiration // inferred from mutant phenotype /// 6623 // protein targeting to vacuole // inferred from mutant phenotype /// 6878 // copper ion homeostasis // inferred from mutant phenotype /// 6879 // iron ion homeostasis // inferred from mutant phenotype /// 6897 // endocyto…	5634 // nucleus // inferred from physical interaction /// 5758 // mitochondrial intermembrane space // inferred from direct assay /// 42719 // mitochondrial intermembrane space protein transporter complex // inferred from direct assay /// 5750 // respiratory chain complex III (sensu Eukaryota) // inferred from direct assay /// 16021 // integral to membrane // inferred from direct assay /// 5737 /…	---
1714	142913_at	0.696295	2.13355	5.5001	4.89e-06	1.97e-05	3.35811	FBgn0002932	CG11988	neur	neuralized	41085	3677 // DNA binding // inferred from sequence or structural similarity /// 4842 // ubiquitin-protein ligase activity // inferred from direct assay /// 8270 // zinc ion binding // inferred from electronic annotation /// 5515 // protein binding // inferred from physical interaction /// 3677 // DNA binding // inferred from electronic annotation /// 5515 // protein binding // inferred from electronic…	7398 // ectoderm development // traceable author statement /// 7399 // nervous system development // inferred from mutant phenotype /// 7399 // nervous system development // non-traceable author statement /// 7422 // peripheral nervous system development // inferred from mutant phenotype /// 7423 // sensory organ development // inferred from mutant phenotype /// 7456 // eye development (sensu End…	151 // ubiquitin ligase complex // inferred from electronic annotation /// 5634 // nucleus // non-traceable author statement /// 5737 // cytoplasm // inferred from direct assay /// 5886 // plasma membrane // inferred from direct assay /// 48471 // perinuclear region // inferred from direct assay /// 5634 // nucleus // inferred from electronic annotation	IPR006573 // NEUZ // 3.8E-52 /// IPR006573 // NEUZ // 6.6E-51 /// IPR001841 // Zn-finger, RING // 2.5E-7 /// IPR001841 // Zn-finger, RING // 2.5E-7 /// IPR006573 // NEUZ // 3.8E-52 /// IPR006573 // NEUZ // 6.6E-51 /// IPR001841 // Zn-finger, RING // 2.5E-7 /// IPR001841 // Zn-finger, RING // 2.5E-7
6065	147264_at	0.696061	1.42211	3.2112	0.00304316	0.00612215	-2.94603	---	CG30084	---	---	---	5515 // protein binding // inferred from electronic annotation /// 8270 // zinc ion binding // inferred from electronic annotation /// 46872 // metal ion binding // inferred from electronic annotation	---	---	---
7130	148329_at	0.695724	0.0380441	5.96525	1.28e-06	6.07e-06	4.69549	FBgn0052380	CG32380	SMSr	SMSr	38823	---	6686 // sphingomyelin biosynthesis // non-traceable author statement /// 6629 // lipid metabolism // inferred from electronic annotation /// 6665 // sphingolipid metabolism // inferred from electronic annotation	16021 // integral to membrane // non-traceable author statement /// 16020 // membrane // inferred from electronic annotation /// 16021 // integral to membrane // inferred from electronic annotation	---
162	141361_at	0.695588	2.99711	6.89629	9.14e-08	6.23e-07	7.34492	FBgn0039637	CG11880	CG11880	CG11880	43440	5215 // transporter activity // inferred from electronic annotation	6810 // transport // inferred from electronic annotation	---	IPR007603 // Protein of unknown function DUF580 // 1.0E-126
13864	155063_at	0.695078	1.22733	6.96499	7.54e-08	5.27e-07	7.53795	FBgn0032929	CG9241	Mcm10	Sensitized chromosome inheritance modifier 19	35390	3682 // chromatin binding // non-traceable author statement	6260 // DNA replication // inferred from mutant phenotype /// 6267 // pre-replicative complex formation and maintenance // non-traceable author statement /// 16321 // female meiosis chromosome segregation // inferred from mutant phenotype /// 30261 // chromosome condensation // inferred from mutant phenotype	5656 // pre-replicative complex // non-traceable author statement	---
10492	151691_at	0.693902	0.887183	6.70177	1.58e-07	9.9e-07	6.79626	FBgn0039851	CG12063	CG12063	CG12063	43715	---	---	---	IPR001507 // Endoglin/CD105 antigen // 3.9E-43 /// IPR003014 // N/apple PAN // 7.5E-15 /// IPR003014 // N/apple PAN // 8.2E-23 /// IPR003014 // N/apple PAN // 1.5E-18
902	142101_at	0.693784	1.00178	7.51134	1.67e-08	1.44e-07	9.0569	---	---	---	---	---	---	---	---	---
12880	154079_at	0.693197	2.1208	5.8294	1.89e-06	8.56e-06	4.30529	FBgn0026149	CG17252	BCL7-like	BCL7-like	31890	---	---	---	IPR006804 // BCL7, N-terminal // 9.7E-39
3076	144275_at	0.69223	1.03422	6.27681	5.26e-07	2.79e-06	5.58787	FBgn0028866	CG18420	CG18420	CG18420	2768924	4252 // serine-type endopeptidase activity // non-traceable author statement /// 4263 // chymotrypsin activity // inferred from electronic annotation /// 4295 // trypsin activity // inferred from electronic annotation	6508 // proteolysis // inferred from electronic annotation	---	IPR001254 // Peptidase S1, chymotrypsin // 1.6E-32
14007	AFFX-YEL002c/WBP1_at	0.692006	0.00628426	11.1456	1.87e-12	5.19e-11	18.2387	---	---	---	---	---	4579 // dolichyl-diphosphooligosaccharide-protein glycotransferase activity // inferred from physical interaction /// 5515 // protein binding // inferred from physical interaction /// 4579 // dolichyl-diphosphooligosaccharide-protein glycotransferase activity // inferred from electronic annotation /// 16740 // transferase activity // inferred from electronic annotation	6487 // protein amino acid N-linked glycosylation // inferred from physical interaction /// 7049 // cell cycle // inferred from direct assay /// 18279 // protein amino acid N-linked glycosylation via asparagine // inferred from electronic annotation	8250 // oligosaccharyl transferase complex // inferred from physical interaction /// 5635 // nuclear envelope // inferred from direct assay /// 5783 // endoplasmic reticulum // inferred from direct assay /// 5783 // endoplasmic reticulum // inferred from electronic annotation /// 5789 // endoplasmic reticulum membrane // inferred from electronic annotation /// 16020 // membrane // inferred from e…	---
10901	152100_at	0.691923	3.88674	4.00468	0.000353686	0.00089443	-0.869655	FBgn0028490	CG31705	CG31705	CG31705	34577	---	---	---	---
2132	143331_at	0.691845	0.323756	8.8132	5.27e-10	7.27e-09	12.5408	FBgn0003313	CG4922	sala	spalt-adjacent	34570	---	7275 // development // inferred from electronic annotation	---	---
9978	151177_at	0.69054	-1.23107	6.11316	8.39e-07	4.18e-06	5.11968	FBgn0040700	CG13719	CG13719	CG13719	50173	---	---	---	---
10273	151472_at	0.690539	2.66331	6.26128	5.5e-07	2.9e-06	5.54349	FBgn0039352	CG5053	CG5053	CG5053	43096	5515 // protein binding // inferred from physical interaction	7165 // signal transduction // inferred from electronic annotation	---	IPR000159 // RA domain // 2.1E-9
2180	143379_at	0.689952	-0.0660935	8.65214	7.99e-10	1.05e-08	12.1211	FBgn0003720	CG1378	tll	tailless	43656	3677 // DNA binding // non-traceable author statement /// 3700 // transcription factor activity // inferred from sequence or structural similarity /// 3707 // steroid hormone receptor activity // inferred from electronic annotation /// 4879 // ligand-dependent nuclear receptor activity // inferred from sequence or structural similarity /// 4879 // ligand-dependent nuclear receptor activity // non…	1708 // cell fate specification // traceable author statement /// 1746 // Bolwig's organ morphogenesis // traceable author statement /// 1748 // optic placode development (sensu Endopterygota) // inferred from mutant phenotype /// 6351 // transcription, DNA-dependent // non-traceable author statement /// 6357 // regulation of transcription from RNA polymerase II promoter // inferred from electron…	5634 // nucleus // inferred from sequence or structural similarity /// 5634 // nucleus // non-traceable author statement /// 5634 // nucleus // inferred from electronic annotation /// 5634 // nucleus // inferred from sequence similarity	IPR000536 // Ligand-binding domain of nuclear hormone receptor // 2.0E-41 /// IPR001628 // Zn-finger, C4-type steroid receptor // 5.5E-49
9504	150703_at	0.689815	2.27716	3.84793	0.000546925	0.00132362	-1.29397	FBgn0039475	CG6277	CG6277	CG6277	43251	4806 // triacylglycerol lipase activity // inferred from sequence or structural similarity /// 8970 // phospholipase A1 activity // inferred from electronic annotation /// 3824 // catalytic activity // inferred from electronic annotation /// 4806 // triacylglycerol lipase activity // inferred from sequence similarity	6629 // lipid metabolism // inferred from electronic annotation	---	IPR000734 // Lipase // 3.0E-55
3602	144801_at	0.689276	-0.441022	12.5862	8.09e-14	3.44e-12	21.4109	FBgn0052683	CG32683	CG32683	CG32683	31970	---	6886 // intracellular protein transport // inferred from electronic annotation /// 6897 // endocytosis // inferred from electronic annotation /// 7165 // signal transduction // inferred from electronic annotation /// 7166 // cell surface receptor linked signal transduction // inferred from electronic annotation /// 7186 // G-protein coupled receptor protein signaling pathway // inferred from elec…	---	IPR000698 // Arrestin // 1.2E-42
5128	146327_at	0.68926	-0.281678	9.8508	3.93e-11	7.53e-10	15.1636	FBgn0051729	CG31729	CG31729	CG31729	34736	5524 // ATP binding // inferred from electronic annotation /// 15662 // ATPase activity, coupled to transmembrane movement of ions, phosphorylative mechanism // inferred from sequence or structural similarity /// 5515 // protein binding // inferred from physical interaction /// 166 // nucleotide binding // inferred from electronic annotation /// 3824 // catalytic activity // inferred from electro…	6629 // lipid metabolism // inferred from electronic annotation /// 6812 // cation transport // inferred from sequence or structural similarity /// 6869 // lipid transport // inferred from electronic annotation /// 6812 // cation transport // inferred from electronic annotation /// 8152 // metabolism // inferred from electronic annotation /// 6812 // cation transport // inferred from sequence sim…	16020 // membrane // inferred from electronic annotation /// 16021 // integral to membrane // inferred from electronic annotation	IPR008250 // E1-E2 ATPase-associated region // 0.0011
12005	153204_at	0.688744	0.374256	9.96496	2.98e-11	6e-10	15.4436	FBgn0030406	CG1463	CG1463	CG1463	32211	---	---	---	IPR007529 // HIT Zn-finger // 6.6E-6
8069	149268_at	0.687771	-0.245379	10.5958	6.65e-12	1.6e-10	16.9596	FBgn0037223	CG14638	CG14638	CG14638	40533	---	---	---	IPR004145 // Protein of unknown function DUF243 // 1.0E-73
7161	148360_at	0.686878	3.88018	7.39253	2.31e-08	1.9e-07	8.72916	FBgn0035817	CG7409	CG7409	CG7409	38870	51082 // unfolded protein binding // inferred from sequence or structural similarity /// 5515 // protein binding // inferred from physical interaction /// 51082 // unfolded protein binding // inferred from sequence similarity	6457 // protein folding // inferred from electronic annotation /// 6457 // protein folding // inferred from sequence or structural similarity /// 6950 // response to stress // inferred from electronic annotation /// 6952 // defense response // inferred from electronic annotation /// 6457 // protein folding // inferred from sequence similarity	---	IPR002068 // Heat shock protein Hsp20 // 2.9E-17
12101	153300_at	0.686589	1.58014	8.60962	8.92e-10	1.17e-08	12.0098	FBgn0030048	CG12112	CG12112	CG12112	31794	---	---	---	---
10532	151731_at	0.686577	0.769358	6.35623	4.19e-07	2.3e-06	5.81458	FBgn0003189	CG18572	r	rudimentary	32640	3700 // transcription factor activity // inferred from electronic annotation /// 4049 // anthranilate synthase activity // inferred from electronic annotation /// 4070 // aspartate carbamoyltransferase activity // inferred from sequence or structural similarity /// 4087 // carbamoyl-phosphate synthase (ammonia) activity // inferred from sequence or structural similarity /// 4151 // dihydroorotase…	6207 // 'de novo' pyrimidine base biosynthesis // non-traceable author statement /// 6355 // regulation of transcription, DNA-dependent // inferred from electronic annotation /// 6526 // arginine biosynthesis // inferred from electronic annotation /// 6807 // nitrogen compound metabolism // inferred from electronic annotation /// 8652 // amino acid biosynthesis // inferred from electronic annotat…	5737 // cytoplasm // non-traceable author statement /// 9347 // aspartate carbamoyltransferase complex // inferred from electronic annotation /// 5737 // cytoplasm // inferred from electronic annotation	IPR000991 // Glutamine amidotransferase class-I // 1.7E-61 /// IPR005481 // Carbamoyl-phosphate synthetase large chain, N-terminal // 4.6E-67 /// IPR005481 // Carbamoyl-phosphate synthetase large chain, N-terminal // 4.3E-9 /// IPR005479 // Carbamoyl-phosphate synthase L chain, ATP-binding // 1.0E-126 /// IPR004362 // Methylglyoxal synthase-like domain // 6.5E-17 /// IPR002474 // Carbamoyl-phosph…
10253	151452_at	0.686487	2.73759	4.31612	0.000147104	0.000406654	-0.0112926	FBgn0040993	CG17325	CG17325	CG17325	50467	5515 // protein binding // inferred from physical interaction	---	---	---
13672	154871_at	0.686427	2.45991	5.33285	7.93e-06	3.02e-05	2.87715	FBgn0034897	CG11299	CG11299	CG11299	37755	5515 // protein binding // inferred from physical interaction	74 // regulation of progression through cell cycle // inferred from electronic annotation /// 7050 // cell cycle arrest // inferred from electronic annotation	5634 // nucleus // non-traceable author statement /// 5634 // nucleus // inferred from electronic annotation	IPR006730 // PA26 p53-induced protein (sestrin) // 1.0E-126
6758	147957_at	0.685195	0.569366	8.3166	1.92e-09	2.29e-08	11.2362	FBgn0035184	CG9094	CG9094	CG9094	38117	---	---	---	---
849	142048_at	0.685121	1.62991	5.76863	2.26e-06	9.98e-06	4.13058	---	---	---	---	---	---	---	---	---
9359	150558_at	0.684585	-0.420729	10.1248	2.03e-11	4.24e-10	15.8327	FBgn0039288	CG13653	CG13653	CG13653	43025	---	---	---	---
9558	150757_at	0.684581	3.04331	6.46733	3.06e-07	1.76e-06	6.1311	FBgn0039553	CG5017	CG5017	CG5017	43343	---	6334 // nucleosome assembly // inferred from sequence or structural similarity /// 6461 // protein complex assembly // inferred from electronic annotation /// 6334 // nucleosome assembly // inferred from electronic annotation /// 6334 // nucleosome assembly // inferred from sequence similarity	5634 // nucleus // inferred from electronic annotation	IPR002164 // Nucleosome assembly protein (NAP) // 1.6E-46
5333	146532_at	0.683973	2.66723	6.54551	2.45e-07	1.45e-06	6.35333	FBgn0020303	CG10746	fok	fledgling of Klp38B	44380	---	---	---	---
13329	154528_at	0.683962	1.93036	6.17361	7.06e-07	3.61e-06	5.29276	FBgn0003002	CG1133	opa	odd paired	40605	3700 // transcription factor activity // inferred from sequence or structural similarity /// 3704 // specific RNA polymerase II transcription factor activity // inferred from sequence or structural similarity /// 3704 // specific RNA polymerase II transcription factor activity // non-traceable author statement /// 8270 // zinc ion binding // inferred from electronic annotation /// 5515 // protein…	6357 // regulation of transcription from RNA polymerase II promoter // inferred from electronic annotation /// 6357 // regulation of transcription from RNA polymerase II promoter // inferred from sequence or structural similarity /// 7365 // periodic partitioning // non-traceable author statement /// 7494 // midgut development // inferred from expression pattern /// 7494 // midgut development // …	5634 // nucleus // inferred from sequence or structural similarity /// 5634 // nucleus // non-traceable author statement /// 5634 // nucleus // inferred from electronic annotation /// 5634 // nucleus // inferred from sequence similarity	IPR007087 // Zn-finger, C2H2 type // 1.0E-7 /// IPR007087 // Zn-finger, C2H2 type // 1.6E-6
11684	152883_at	0.683885	2.82905	6.34336	4.35e-07	2.37e-06	5.77786	FBgn0039511	CG3330	CG3330	CG3330	43296	---	---	---	---
990	142189_at	0.683644	2.03423	8.40538	1.52e-09	1.87e-08	11.4717	FBgn0013772	CG10248	Cyp6a8	Cytochrome P450-6a8	36666	4497 // monooxygenase activity // inferred from electronic annotation /// 8393 // fatty acid (omega-1)-hydroxylase activity // inferred from direct assay /// 16491 // oxidoreductase activity // inferred from electronic annotation /// 5506 // iron ion binding // inferred from electronic annotation /// 20037 // heme binding // inferred from electronic annotation /// 46872 // metal ion binding // in…	6118 // electron transport // inferred from electronic annotation /// 8202 // steroid metabolism // inferred from electronic annotation /// 17143 // insecticide metabolism // inferred from direct assay /// 48252 // lauric acid metabolism // inferred from direct assay	5792 // microsome // non-traceable author statement /// 16020 // membrane // non-traceable author statement /// 5783 // endoplasmic reticulum // inferred from electronic annotation /// 5792 // microsome // inferred from electronic annotation /// 16020 // membrane // inferred from electronic annotation	IPR001128 // Cytochrome P450 // 2.4E-126
2284	143483_at	0.683272	1.71705	6.3645	4.1e-07	2.25e-06	5.83818	FBgn0004569	CG4531	argos	argos	39833	5154 // epidermal growth factor receptor binding // non-traceable author statement /// 5154 // epidermal growth factor receptor binding // traceable author statement /// 48019 // receptor antagonist activity // non-traceable author statement /// 48019 // receptor antagonist activity // traceable author statement	7411 // axon guidance // non-traceable author statement /// 7472 // wing disc morphogenesis // inferred from mutant phenotype /// 7476 // wing morphogenesis // inferred from mutant phenotype /// 9996 // negative regulation of cell fate specification // traceable author statement /// 16318 // ommatidial rotation // inferred from mutant phenotype /// 30707 // ovarian follicle cell development (sens…	5576 // extracellular region // inferred from sequence or structural similarity /// 5576 // extracellular region // non-traceable author statement /// 5576 // extracellular region // traceable author statement /// 5576 // extracellular region // inferred from sequence similarity	---
5398	146597_at	0.682888	1.70363	4.83676	3.32e-05	0.000107426	1.45663	FBgn0032960	CG11628	Grp1	General receptor for phosphoinositides 1	35425	5086 // ARF guanyl-nucleotide exchange factor activity // inferred from sequence or structural similarity /// 5515 // protein binding // inferred from physical interaction /// 5085 // guanyl-nucleotide exchange factor activity // inferred from electronic annotation /// 5086 // ARF guanyl-nucleotide exchange factor activity // inferred from sequence similarity	6886 // intracellular protein transport // inferred from electronic annotation /// 6887 // exocytosis // inferred from electronic annotation	---	IPR000904 // SEC7-like domain // 1.0E-101 /// IPR001849 // Pleckstrin-like // 2.4E-30
3761	144960_at	0.682076	1.00373	6.80618	1.18e-07	7.76e-07	7.09115	FBgn0030418	CG4004	CG4004	CG4004	32226	---	---	---	---
12390	153589_at	0.681885	0.517055	9.56889	7.85e-11	1.37e-09	14.465	FBgn0036536	CG12713	CG12713	CG12713	39724	---	---	---	---
10526	151725_s_at	0.681776	1.45574	5.63071	3.36e-06	1.42e-05	3.73388	FBgn0038889	CG7922	CG7922	CG7922	42543	3676 // nucleic acid binding // inferred from electronic annotation /// 4004 // ATP-dependent RNA helicase activity // inferred from sequence or structural similarity /// 4386 // helicase activity // inferred from sequence or structural similarity /// 5524 // ATP binding // inferred from electronic annotation /// 15668 // type III site-specific deoxyribonuclease activity // inferred from electron…	9307 // DNA restriction-modification system // inferred from electronic annotation	---	IPR001410 // DEAD/DEAH box helicase // 2.3E-21 /// IPR001650 // Helicase, C-terminal // 6.3E-23
9775	150974_at	0.681776	1.91531	6.31284	4.75e-07	2.56e-06	5.69076	FBgn0039900	CG2381	Syt7	Syt7	43783	5215 // transporter activity // inferred from electronic annotation /// 5544 // calcium-dependent phospholipid binding // non-traceable author statement	6886 // intracellular protein transport // inferred from electronic annotation /// 7269 // neurotransmitter secretion // non-traceable author statement /// 16079 // synaptic vesicle exocytosis // inferred from sequence or structural similarity /// 16192 // vesicle-mediated transport // non-traceable author statement /// 6810 // transport // inferred from electronic annotation /// 16079 // synapti…	8021 // synaptic vesicle // inferred from sequence or structural similarity /// 16020 // membrane // inferred from electronic annotation /// 8021 // synaptic vesicle // inferred from electronic annotation /// 8021 // synaptic vesicle // inferred from sequence similarity	IPR000008 // C2 domain // 1.3E-38 /// IPR000008 // C2 domain // 5.5E-32 /// IPR000008 // C2 domain // 1.3E-38 /// IPR000008 // C2 domain // 5.5E-32 /// IPR000008 // C2 domain // 1.5E-11
11965	153164_at	0.681358	1.24899	8.34883	1.76e-09	2.13e-08	11.3218	FBgn0031488	CG17265	CG17265	CG17265	33509	---	---	---	---
642	141841_at	0.681046	1.67385	5.47356	5.28e-06	2.11e-05	3.28177	---	---	---	---	---	---	---	---	---
4589	145788_at	0.680899	2.10562	6.20433	6.47e-07	3.35e-06	5.38068	FBgn0031643	CG3008	CG3008	CG3008	33693	4672 // protein kinase activity // non-traceable author statement /// 16301 // kinase activity // inferred from electronic annotation /// 16740 // transferase activity // inferred from electronic annotation	6468 // protein amino acid phosphorylation // inferred from electronic annotation	---	IPR000687 // Protein of unknown function RIO1 // 5.4E-107
9248	150447_at	0.680402	0.746312	7.4557	1.94e-08	1.64e-07	8.9036	FBgn0039080	CG17382	CG17382	CG17382	42769	---	---	---	---
786	141985_at	0.679703	1.03047	6.32778	4.55e-07	2.47e-06	5.73342	---	---	---	---	---	---	---	---	---
13896	155095_at	0.679344	1.03242	9.60551	7.17e-11	1.27e-09	14.5564	FBgn0031399	CG7074	mio	missing oocyte	33399	51082 // unfolded protein binding // inferred from sequence or structural similarity /// 51082 // unfolded protein binding // inferred from sequence similarity	6457 // protein folding // inferred from sequence or structural similarity /// 16350 // maintenance of oocyte identity (sensu Insecta) // inferred from mutant phenotype /// 30716 // oocyte fate determination // inferred from mutant phenotype /// 40020 // regulation of meiosis // inferred from mutant phenotype /// 6457 // protein folding // inferred from sequence similarity	---	---
5741	146940_at	0.678639	3.24489	5.1194	1.47e-05	5.22e-05	2.2644	FBgn0033512	CG12902	CG12902	CG12902	36092	---	---	---	---
2203	143402_at	0.67832	-0.303029	12.0344	2.62e-13	9.53e-12	20.2259	FBgn0003970	CG3506	vas	vasa	34884	3676 // nucleic acid binding // inferred from electronic annotation /// 3724 // RNA helicase activity // traceable author statement /// 5524 // ATP binding // inferred from electronic annotation /// 8026 // ATP-dependent helicase activity // non-traceable author statement /// 5515 // protein binding // inferred from physical interaction /// 166 // nucleotide binding // inferred from electronic an…	6378 // mRNA polyadenylylation // traceable author statement /// 6445 // regulation of translation // traceable author statement /// 7278 // pole cell fate determination // non-traceable author statement /// 7294 // oocyte fate determination (sensu Insecta) // traceable author statement /// 7314 // oocyte anterior/posterior axis determination // non-traceable author statement /// 7315 // pole pla…	18994 // polar granule // inferred from direct assay /// 18994 // polar granule // traceable author statement /// 45495 // pole plasm // traceable author statement	IPR001650 // Helicase, C-terminal // 5.9E-36 /// IPR001410 // DEAD/DEAH box helicase // 2.7E-88 /// IPR001650 // Helicase, C-terminal // 5.9E-36 /// IPR001410 // DEAD/DEAH box helicase // 3.1E-87
3618	144817_s_at	0.67729	-0.223627	9.00531	3.23e-10	4.76e-09	13.0371	FBgn0067052 /// FBgn0030221 /// FBgn0052671	CG32678 /// CG9807 /// CG32671	Rab9D /// CG9807 /// CG32671	Rab9D /// CG9807 /// CG32671	318149 /// 31993 /// 326230	3677 // DNA binding // inferred from electronic annotation /// 3924 // GTPase activity // inferred from electronic annotation /// 5525 // GTP binding // inferred from electronic annotation /// 3924 // GTPase activity // inferred from sequence or structural similarity /// 3924 // GTPase activity // inferred from sequence similarity	160 // two-component signal transduction system (phosphorelay) // inferred from electronic annotation /// 6355 // regulation of transcription, DNA-dependent // inferred from electronic annotation /// 6886 // intracellular protein transport // inferred from electronic annotation /// 6887 // exocytosis // inferred from electronic annotation /// 7264 // small GTPase mediated signal transduction // i…	---	IPR001806 // Ras GTPase superfamily // 8.3E-50 /// IPR001806 // Ras GTPase superfamily // 1.2E-50 /// IPR001806 // Ras GTPase superfamily // 4.2E-51
9372	150571_at	0.677232	1.43431	9.00521	3.23e-10	4.76e-09	13.0368	FBgn0039306	CG11859	CG11859	CG11859	43046	4672 // protein kinase activity // non-traceable author statement	6468 // protein amino acid phosphorylation // non-traceable author statement	---	IPR000687 // Protein of unknown function RIO1 // 1.2E-90
11364	152563_at	0.676776	3.04592	7.03237	6.25e-08	4.48e-07	7.72684	FBgn0038803	CG5191	CG5191	CG5191	42431	4040 // amidase activity // inferred from electronic annotation /// 16787 // hydrolase activity // inferred from electronic annotation /// 17068 // glutamyl-tRNA(Gln) amidotransferase activity // inferred from sequence or structural similarity /// 17068 // glutamyl-tRNA(Gln) amidotransferase activity // inferred from sequence similarity	6418 // tRNA aminoacylation for protein translation // inferred from electronic annotation /// 6807 // nitrogen compound metabolism // inferred from electronic annotation	---	IPR000120 // Amidase // 3.0E-40 /// IPR000120 // Amidase // 2.2E-50 /// IPR000120 // Amidase // 2.2E-50
2002	143201_at	0.676468	0.78775	7.89603	5.88e-09	5.94e-08	10.1075	FBgn0001258	CG10160	ImpL3	Ecdysone-inducible gene L3	45880	4459 // L-lactate dehydrogenase activity // inferred from sequence or structural similarity /// 4459 // L-lactate dehydrogenase activity // non-traceable author statement /// 4459 // L-lactate dehydrogenase activity // traceable author statement /// 5515 // protein binding // inferred from physical interaction /// 4459 // L-lactate dehydrogenase activity // inferred from electronic annotation ///…	6096 // glycolysis // non-traceable author statement /// 6100 // tricarboxylic acid cycle intermediate metabolism // inferred from electronic annotation /// 6096 // glycolysis // inferred from electronic annotation /// 19642 // anaerobic glycolysis // inferred from electronic annotation	5737 // cytoplasm // inferred from electronic annotation	IPR001236 // Lactate/malate dehydrogenase // 4.6E-61 /// IPR001236 // Lactate/malate dehydrogenase // 6.5E-71
10436	151635_s_at	0.675278	3.33202	6.69707	1.6e-07	1e-06	6.78294	FBgn0004889	CG6235	tws	twins	47877	158 // protein phosphatase type 2A activity // inferred from sequence or structural similarity /// 8601 // protein phosphatase type 2A regulator activity // inferred from mutant phenotype /// 8601 // protein phosphatase type 2A regulator activity // non-traceable author statement /// 5515 // protein binding // inferred from physical interaction /// 8601 // protein phosphatase type 2A regulator ac…	90 // mitotic anaphase // inferred from mutant phenotype /// 165 // MAPKKK cascade // inferred from electronic annotation /// 1700 // embryonic development (sensu Insecta) // inferred from mutant phenotype /// 6470 // protein amino acid dephosphorylation // inferred from sequence or structural similarity /// 6470 // protein amino acid dephosphorylation // non-traceable author statement /// 6950 /…	159 // protein phosphatase type 2A complex // inferred from sequence or structural similarity /// 159 // protein phosphatase type 2A complex // non-traceable author statement /// 5737 // cytoplasm // inferred from direct assay /// 159 // protein phosphatase type 2A complex // inferred from direct assay /// 159 // protein phosphatase type 2A complex // inferred from electronic annotation /// 159 /…	IPR001680 // G-protein beta WD-40 repeat // 0.02 /// IPR001680 // G-protein beta WD-40 repeat // 0.21 /// IPR001680 // G-protein beta WD-40 repeat // 0.034 /// IPR001680 // G-protein beta WD-40 repeat // 0.85 /// IPR001680 // G-protein beta WD-40 repeat // 0.02 /// IPR001680 // G-protein beta WD-40 repeat // 0.21 /// IPR001680 // G-protein beta WD-40 repeat // 0.034 /// IPR001680 // G-protein bet…
4444	145643_at	0.675115	3.64948	7.67097	1.08e-08	9.96e-08	9.49485	FBgn0051948	CG31948	CG31948	CG31948	326178	3824 // catalytic activity // inferred from electronic annotation	6629 // lipid metabolism // inferred from electronic annotation	---	IPR000626 // Ubiquitin // 0.015
9437	150636_at	0.674798	3.14123	3.49156	0.00144694	0.00314972	-2.23459	FBgn0039398	CG14540	CG14540	CG14540	43145	---	---	---	---
4459	145658_at	0.674489	0.327593	7.28346	3.12e-08	2.45e-07	8.42698	FBgn0041248	CG15396	Gr23a	Gustatory receptor 23a	33453	8527 // taste receptor activity // inferred from sequence or structural similarity /// 8527 // taste receptor activity // non-traceable author statement /// 8527 // taste receptor activity // inferred from sequence similarity	50909 // sensory perception of taste // inferred from sequence or structural similarity /// 50909 // sensory perception of taste // non-traceable author statement /// 50909 // sensory perception of taste // inferred from sequence similarity	16021 // integral to membrane // non-traceable author statement	---
5155	146354_at	0.673146	0.316027	7.61118	1.27e-08	1.15e-07	9.33115	FBgn0032549	CG4650	CG4650	CG4650	34859	4252 // serine-type endopeptidase activity // non-traceable author statement /// 4263 // chymotrypsin activity // inferred from electronic annotation /// 4295 // trypsin activity // inferred from electronic annotation /// 4252 // serine-type endopeptidase activity // inferred from electronic annotation	6508 // proteolysis // inferred from electronic annotation	---	---
5089	146288_at	0.672884	0.911391	6.80116	1.19e-07	7.85e-07	7.07698	FBgn0032435	CG6417	Oatp33Eb	Organic anion transporting polypeptide 33Eb	34662	8514 // organic anion transporter activity // inferred from sequence or structural similarity /// 15347 // sodium-independent organic anion transporter activity // inferred from sequence or structural similarity /// 5215 // transporter activity // inferred from electronic annotation /// 8514 // organic anion transporter activity // inferred from sequence similarity /// 15347 // sodium-independent…	6820 // anion transport // inferred from electronic annotation /// 15711 // organic anion transport // inferred from sequence or structural similarity /// 6810 // transport // inferred from electronic annotation /// 15711 // organic anion transport // inferred from sequence similarity	16020 // membrane // inferred from electronic annotation	IPR004157 // Organic anion transporter polypeptide (OATP), C-terminal // 1.4E-8 /// IPR004157 // Organic anion transporter polypeptide (OATP), C-terminal // 3.0E-15
4308	145507_at	0.672571	2.37858	6.14794	7.6e-07	3.85e-06	5.21928	FBgn0031213	CG11372	galectin	galectin	33162	5102 // receptor binding // inferred from electronic annotation /// 15143 // urate transporter activity // inferred from sequence or structural similarity /// 16936 // galactoside binding // inferred from direct assay /// 16936 // galactoside binding // inferred from sequence or structural similarity /// 5529 // sugar binding // inferred from electronic annotation /// 15143 // urate transporter a…	6917 // induction of apoptosis // inferred from electronic annotation	5829 // cytosol // inferred from direct assay	IPR001079 // Galectin, galactose-binding lectin // 3.2E-19 /// IPR001079 // Galectin, galactose-binding lectin // 3.1E-9
10402	151601_at	0.671995	0.160263	8.72406	6.64e-10	8.89e-09	12.309	FBgn0033159	---	Dscam	Down syndrome cell adhesion molecule	35652	8046 // axon guidance receptor activity // non-traceable author statement	6520 // amino acid metabolism // inferred from electronic annotation /// 7155 // cell adhesion // inferred from electronic annotation /// 7398 // ectoderm development // inferred from electronic annotation /// 7411 // axon guidance // inferred from genetic interaction /// 7411 // axon guidance // inferred from mutant phenotype /// 7411 // axon guidance // traceable author statement /// 7422 // pe…	5887 // integral to plasma membrane // inferred from sequence or structural similarity /// 16020 // membrane // inferred from electronic annotation /// 5887 // integral to plasma membrane // inferred from sequence similarity	IPR003961 // Fibronectin, type III // 1.5E-16 /// IPR003961 // Fibronectin, type III // 5.9E-11 /// IPR003961 // Fibronectin, type III // 8.1E-10 /// IPR007110 // Immunoglobulin-like // 2.5E-7
7195	148394_at	0.670984	1.87884	10.9069	3.23e-12	8.44e-11	17.688	FBgn0035877	CG7083	CG7083	CG7083	38943	---	---	---	IPR005373 // Protein of unknown function UPF0183 // 1.0E-126
1077	142276_at	0.670139	1.30412	7.32116	2.81e-08	2.25e-07	8.53156	FBgn0004607	CG1449	zfh2	Zn finger homeodomain 2	43795	3677 // DNA binding // non-traceable author statement /// 3677 // DNA binding // traceable author statement /// 3700 // transcription factor activity // inferred from electronic annotation /// 3702 // RNA polymerase II transcription factor activity // inferred from sequence or structural similarity /// 3729 // mRNA binding // inferred from electronic annotation /// 8270 // zinc ion binding // inf…	6357 // regulation of transcription from RNA polymerase II promoter // inferred from electronic annotation /// 7398 // ectoderm development // inferred from electronic annotation /// 7399 // nervous system development // inferred from expression pattern /// 7417 // central nervous system development // non-traceable author statement /// 7476 // wing morphogenesis // inferred from mutant phenotype…	5634 // nucleus // inferred from sequence or structural similarity /// 5634 // nucleus // non-traceable author statement /// 5634 // nucleus // inferred from electronic annotation /// 5634 // nucleus // inferred from sequence similarity	IPR001356 // Homeobox // 3.1E-10 /// IPR001356 // Homeobox // 4.3E-21 /// IPR001356 // Homeobox // 9.8E-22 /// IPR007087 // Zn-finger, C2H2 type // 2.5E-5 /// IPR007087 // Zn-finger, C2H2 type // 8.8E-5 /// IPR007087 // Zn-finger, C2H2 type // 1.0E-4
8716	149915_at	0.670002	1.71307	4.78099	3.9e-05	0.000124393	1.29796	FBgn0038258	CG7362	CG7362	CG7362	41787	4743 // pyruvate kinase activity // inferred from sequence or structural similarity /// 19200 // carbohydrate kinase activity // inferred from electronic annotation /// 4743 // pyruvate kinase activity // inferred from electronic annotation /// 4743 // pyruvate kinase activity // inferred from sequence similarity	6096 // glycolysis // inferred from electronic annotation	---	IPR001697 // Pyruvate kinase // 3.3E-5 /// IPR001697 // Pyruvate kinase // 1.8E-23 /// IPR001697 // Pyruvate kinase // 3.5E-97
11662	152861_at	0.66957	1.67718	4.91082	2.68e-05	8.88e-05	1.66777	FBgn0033391	CG8026	CG8026	CG8026	35941	5386 // carrier activity // inferred from sequence or structural similarity /// 5488 // binding // inferred from electronic annotation /// 8517 // folic acid transporter activity // inferred from sequence or structural similarity /// 5215 // transporter activity // inferred from electronic annotation /// 5386 // carrier activity // inferred from sequence similarity /// 8517 // folic acid transpor…	6839 // mitochondrial transport // inferred from sequence or structural similarity /// 15884 // folic acid transport // inferred from sequence or structural similarity /// 6810 // transport // inferred from electronic annotation /// 6839 // mitochondrial transport // inferred from electronic annotation /// 6839 // mitochondrial transport // inferred from sequence similarity /// 15884 // folic aci…	5740 // mitochondrial envelope // inferred from sequence or structural similarity /// 5743 // mitochondrial inner membrane // inferred from sequence or structural similarity /// 5739 // mitochondrion // inferred from electronic annotation /// 5743 // mitochondrial inner membrane // inferred from electronic annotation /// 16020 // membrane // inferred from electronic annotation /// 16021 // integr…	IPR001993 // Mitochondrial substrate carrier // 2.5E-30 /// IPR001993 // Mitochondrial substrate carrier // 4.4E-31 /// IPR001993 // Mitochondrial substrate carrier // 1.3E-16 /// IPR001993 // Mitochondrial substrate carrier // 1.7E-10
2629	143828_at	0.669283	2.99473	9.70531	5.61e-11	1.03e-09	14.8044	FBgn0015589	CG1451	Apc	APC-like	44642	5200 // structural constituent of cytoskeleton // inferred from electronic annotation /// 8013 // beta-catenin binding // inferred from direct assay /// 8017 // microtubule binding // inferred from sequence or structural similarity /// 5488 // binding // inferred from electronic annotation /// 5515 // protein binding // inferred from electronic annotation /// 8017 // microtubule binding // inferr…	74 // regulation of progression through cell cycle // inferred from electronic annotation /// 6915 // apoptosis // inferred from electronic annotation /// 7017 // microtubule-based process // inferred from sequence or structural similarity /// 7155 // cell adhesion // inferred from electronic annotation /// 7163 // establishment and/or maintenance of cell polarity // non-traceable author statemen…	5875 // microtubule associated complex // inferred from sequence or structural similarity /// 16327 // apicolateral plasma membrane // traceable author statement /// 5875 // microtubule associated complex // inferred from sequence similarity	IPR009223 // APC cysteine-rich // 1.2E-9 /// IPR009223 // APC cysteine-rich // 1.3E-9 /// IPR009223 // APC cysteine-rich // 1.6E-9 /// IPR009223 // APC cysteine-rich // 3.0E-9 /// IPR009223 // APC cysteine-rich // 1.7E-9 /// IPR009223 // APC cysteine-rich // 1.1E-9 /// IPR009240 // APC 15 residue // 4.6E-7 /// IPR009240 // APC 15 residue // 4.4E-7 /// IPR000225 // Armadillo // 1.6E-7 /// IPR00022…
10240	151439_at	0.669129	-0.241847	7.71082	9.69e-09	9.07e-08	9.60375	FBgn0040977	CG15292	CG15292	CG15292	50451	---	---	---	---
6301	147500_at	0.668994	0.153741	6.67279	1.71e-07	1.06e-06	6.71425	FBgn0026193	CG8201	par-1	par-1	2768852	4672 // protein kinase activity // inferred from direct assay /// 4674 // protein serine/threonine kinase activity // inferred from sequence or structural similarity /// 4674 // protein serine/threonine kinase activity // non-traceable author statement /// 4713 // protein-tyrosine kinase activity // inferred from electronic annotation /// 5524 // ATP binding // inferred from electronic annotation…	226 // microtubule cytoskeleton organization and biogenesis // inferred from mutant phenotype /// 6468 // protein amino acid phosphorylation // inferred from sequence or structural similarity /// 6468 // protein amino acid phosphorylation // non-traceable author statement /// 7015 // actin filament organization // inferred from mutant phenotype /// 7276 // gametogenesis // inferred from mutant ph…	5875 // microtubule associated complex // inferred from electronic annotation /// 5938 // cell cortex // inferred from direct assay /// 16323 // basolateral plasma membrane // inferred from direct assay /// 45169 // fusome // inferred from direct assay /// 45172 // ring canal (sensu Insecta) // inferred from direct assay /// 5694 // chromosome // inferred from electronic annotation	IPR000449 // Ubiquitin-associated domain // 1.1E-4 /// IPR000719 // Protein kinase // 1.0E-101
319	141518_at	0.668073	1.6769	6.60106	2.1e-07	1.27e-06	6.51101	FBgn0003117	CG3978	pnr	pannier	44849	3700 // transcription factor activity // inferred from sequence or structural similarity /// 3700 // transcription factor activity // traceable author statement /// 3700 // transcription factor activity // inferred from electronic annotation /// 8270 // zinc ion binding // inferred from electronic annotation /// 43565 // sequence-specific DNA binding // inferred from electronic annotation /// 370…	6357 // regulation of transcription from RNA polymerase II promoter // inferred from electronic annotation /// 7179 // transforming growth factor beta receptor signaling pathway // traceable author statement /// 7350 // blastoderm segmentation // inferred from mutant phenotype /// 7389 // pattern specification // non-traceable author statement /// 7391 // dorsal closure // traceable author statem…	5634 // nucleus // inferred from sequence or structural similarity /// 5634 // nucleus // inferred from electronic annotation /// 5634 // nucleus // inferred from sequence similarity	IPR000679 // Zn-finger, GATA type // 3.0E-20 /// IPR000679 // Zn-finger, GATA type // 2.3E-21 /// IPR000679 // Zn-finger, GATA type // 3.0E-20 /// IPR000679 // Zn-finger, GATA type // 2.3E-21
2259	143458_at	0.668065	0.500122	7.35872	2.53e-08	2.06e-07	8.63561	FBgn0004395	CG4620	unk	unkempt	42738	3677 // DNA binding // non-traceable author statement /// 4842 // ubiquitin-protein ligase activity // inferred from electronic annotation /// 8270 // zinc ion binding // non-traceable author statement /// 5515 // protein binding // inferred from physical interaction /// 3676 // nucleic acid binding // inferred from electronic annotation /// 5515 // protein binding // inferred from electronic ann…	2164 // larval development // inferred from mutant phenotype /// 7456 // eye development (sensu Endopterygota) // inferred from mutant phenotype /// 7476 // wing morphogenesis // inferred from mutant phenotype /// 8407 // bristle morphogenesis // inferred from mutant phenotype /// 16567 // protein ubiquitination // inferred from electronic annotation /// 7275 // development // inferred from elect…	151 // ubiquitin ligase complex // inferred from electronic annotation /// 5737 // cytoplasm // inferred from direct assay	IPR000571 // Zn-finger, C-x8-C-x5-C-x3-H type // 6.4E-7
1252	142451_at	0.668003	2.02456	5.30191	8.67e-06	3.27e-05	2.78825	---	---	---	---	---	16564 // transcriptional repressor activity // inferred from genetic interaction /// 5515 // protein binding // inferred from physical interaction /// 3682 // chromatin binding // inferred from sequence or structural similarity /// 4386 // helicase activity // inferred from sequence or structural similarity /// 3677 // DNA binding // inferred from direct assay /// 16887 // ATPase activity // infe…	6333 // chromatin assembly or disassembly // inferred from sequence or structural similarity /// 42766 // nucleosome mobilization // inferred from direct assay /// 6333 // chromatin assembly or disassembly // inferred from electronic annotation /// 6350 // transcription // inferred from electronic annotation /// 6355 // regulation of transcription, DNA-dependent // inferred from electronic annota…	5634 // nucleus // inferred from sequence or structural similarity /// 5700 // polytene chromosome // inferred from direct assay /// 785 // chromatin // inferred from electronic annotation /// 5634 // nucleus // inferred from electronic annotation /// 16581 // NuRD complex // traceable author statement	---
9052	150251_at	0.667848	0.12672	8.16049	2.9e-09	3.24e-08	10.8197	FBgn0038783	CG4367	CG4367	CG4367	42409	5515 // protein binding // inferred from physical interaction	---	19028 // viral capsid // inferred from electronic annotation	IPR004302 // Chitin-binding, domain 3 // 2.5E-7
6505	147704_at	0.667655	-0.0698655	8.83742	4.96e-10	6.89e-09	12.6036	FBgn0050259	CG30259	CG30259	CG30259	37606	---	---	---	---
3341	144540_at	0.667328	0.326614	7.39288	2.31e-08	1.9e-07	8.73013	FBgn0000394	CG12410	cv	crossveinless	44510	5515 // protein binding // inferred from electronic annotation	9790 // embryonic development // inferred from electronic annotation	---	IPR006761 // Twisted gastrulation (Tsg) protein // 2.1E-101
3591	144790_at	0.667261	0.576906	9.02386	3.08e-10	4.58e-09	13.0847	FBgn0030189	CG2909	CG2909	CG2909	31958	5515 // protein binding // inferred from physical interaction	---	---	---
13317	154516_at	0.666805	1.43693	6.9406	8.07e-08	5.59e-07	7.46947	FBgn0016070	CG5263	smg	smaug	39034	900 // translation repressor activity, nucleic acid binding // traceable author statement /// 3729 // mRNA binding // non-traceable author statement /// 3729 // mRNA binding // traceable author statement /// 3730 // mRNA 3'-UTR binding // traceable author statement /// 5515 // protein binding // traceable author statement /// 30371 // translation repressor activity // inferred from direct assay /…	16478 // negative regulation of translation // inferred from direct assay /// 16478 // negative regulation of translation // traceable author statement /// 6417 // regulation of protein biosynthesis // inferred from electronic annotation /// 6445 // regulation of translation // inferred from electronic annotation /// 7275 // development // inferred from electronic annotation	5737 // cytoplasm // inferred from direct assay	IPR001660 // Sterile alpha motif SAM // 8.1E-11
7563	148762_at	0.666565	1.0007	6.61432	2.02e-07	1.23e-06	6.54859	FBgn0036440	CG17177	CG17177	CG17177	39601	---	7154 // cell communication // inferred from electronic annotation /// 7165 // signal transduction // inferred from electronic annotation	---	---
10471	151670_at	0.666081	1.09032	6.82416	1.12e-07	7.44e-07	7.14182	FBgn0014931	CG2678	CG2678	CG2678	40937	3700 // transcription factor activity // non-traceable author statement /// 8270 // zinc ion binding // inferred from electronic annotation /// 5515 // protein binding // inferred from physical interaction /// 3676 // nucleic acid binding // inferred from electronic annotation /// 3677 // DNA binding // inferred from electronic annotation /// 46872 // metal ion binding // inferred from electronic…	6355 // regulation of transcription, DNA-dependent // non-traceable author statement /// 6350 // transcription // inferred from electronic annotation /// 6355 // regulation of transcription, DNA-dependent // inferred from electronic annotation	5634 // nucleus // non-traceable author statement /// 5634 // nucleus // inferred from electronic annotation	IPR007087 // Zn-finger, C2H2 type // 1.5E-5 /// IPR007087 // Zn-finger, C2H2 type // 1.4E-4 /// IPR007087 // Zn-finger, C2H2 type // 1.6E-4
13869	155068_at	0.665739	1.62915	6.32033	4.65e-07	2.51e-06	5.71215	FBgn0000404	CG5940	CycA	Cyclin A	39340	16538 // cyclin-dependent protein kinase regulator activity // inferred from direct assay /// 16538 // cyclin-dependent protein kinase regulator activity // inferred from sequence or structural similarity /// 16538 // cyclin-dependent protein kinase regulator activity // non-traceable author statement /// 19209 // kinase activator activity // inferred from electronic annotation /// 16538 // cycli…	70 // mitotic sister chromatid segregation // inferred from mutant phenotype /// 86 // G2/M transition of mitotic cell cycle // non-traceable author statement /// 7067 // mitosis // inferred from mutant phenotype /// 7067 // mitosis // traceable author statement /// 7088 // regulation of mitosis // inferred from expression pattern /// 7422 // peripheral nervous system development // traceable aut…	5634 // nucleus // inferred from direct assay /// 5737 // cytoplasm // inferred from direct assay /// 19908 // nuclear cyclin-dependent protein kinase holoenzyme complex // non-traceable author statement /// 45169 // fusome // traceable author statement /// 45170 // spectrosome // traceable author statement /// 5634 // nucleus // inferred from electronic annotation	IPR004367 // Cyclin, C-terminal // 7.4E-33 /// IPR006671 // Cyclin, N-terminal domain // 2.8E-64 /// IPR004367 // Cyclin, C-terminal // 7.4E-33 /// IPR006671 // Cyclin, N-terminal domain // 2.8E-64
10538	151737_at	0.66496	3.17897	8.22783	2.43e-09	2.8e-08	10.9998	FBgn0052210	CG32210	CG32210	CG32210	40127	4842 // ubiquitin-protein ligase activity // inferred from electronic annotation /// 8270 // zinc ion binding // inferred from electronic annotation /// 5488 // binding // inferred from electronic annotation /// 5515 // protein binding // inferred from electronic annotation	16567 // protein ubiquitination // inferred from electronic annotation	151 // ubiquitin ligase complex // inferred from electronic annotation	IPR001841 // Zn-finger, RING // 3.6E-6
13558	154757_at	0.664953	1.96489	5.81965	1.95e-06	8.77e-06	4.27726	FBgn0035498	CG14991	Fit1	Fermitin 1	38488	50839 // cell adhesion molecule binding // inferred from sequence or structural similarity /// 5515 // protein binding // inferred from physical interaction /// 5488 // binding // inferred from electronic annotation /// 5515 // protein binding // inferred from electronic annotation /// 50839 // cell adhesion molecule binding // inferred from sequence similarity	7160 // cell-matrix adhesion // inferred from sequence or structural similarity /// 7155 // cell adhesion // inferred from electronic annotation /// 7160 // cell-matrix adhesion // inferred from sequence similarity	5737 // cytoplasm // inferred from sequence or structural similarity /// 5856 // cytoskeleton // inferred from electronic annotation /// 5737 // cytoplasm // inferred from sequence similarity	IPR001849 // Pleckstrin-like // 4.9E-15
625	141824_at	0.664749	0.215271	9.03594	2.98e-10	4.48e-09	13.1157	---	---	---	---	---	---	---	---	---
3363	144562_at	0.664581	1.43209	7.39832	2.27e-08	1.88e-07	8.74516	FBgn0029825	CG12728	CG12728	CG12728	31526	5515 // protein binding // inferred from physical interaction	---	---	---
768	141967_at	0.663562	0.840596	7.22947	3.62e-08	2.8e-07	8.27696	---	---	---	---	---	---	---	---	---
7575	148774_at	0.663437	0.988597	6.4445	3.26e-07	1.86e-06	6.06612	FBgn0036459	CG3349	CG3349	CG3349	39623	---	---	---	---
9830	151029_at	0.662546	-0.103957	9.53555	8.52e-11	1.48e-09	14.3817	---	---	---	---	---	---	---	---	---
1101	142300_at	0.662071	1.73509	6.93963	8.09e-08	5.6e-07	7.46673	FBgn0015229	CG6575	glec	gliolectin	42571	30246 // carbohydrate binding // inferred from direct assay /// 30246 // carbohydrate binding // non-traceable author statement	7155 // cell adhesion // non-traceable author statement /// 7157 // heterophilic cell adhesion // inferred from mutant phenotype /// 7399 // nervous system development // inferred from expression pattern /// 7399 // nervous system development // inferred from mutant phenotype /// 7399 // nervous system development // non-traceable author statement	5624 // membrane fraction // inferred from direct assay /// 16021 // integral to membrane // inferred from sequence or structural similarity /// 16021 // integral to membrane // inferred from sequence similarity	---
1868	143067_at	0.661242	0.989918	6.06882	9.53e-07	4.69e-06	4.9926	FBgn0000076	CG11937	amn	amnesiac	32999	1664 // G-protein-coupled receptor binding // non-traceable author statement /// 5184 // neuropeptide hormone activity // inferred from sequence or structural similarity /// 5184 // neuropeptide hormone activity // non-traceable author statement /// 5184 // neuropeptide hormone activity // traceable author statement /// 5184 // neuropeptide hormone activity // inferred from sequence similarity	6171 // cAMP biosynthesis // traceable author statement /// 6960 // antimicrobial humoral response (sensu Protostomia) // inferred from mutant phenotype /// 7218 // neuropeptide signaling pathway // traceable author statement /// 7611 // learning and/or memory // inferred from mutant phenotype /// 7611 // learning and/or memory // non-traceable author statement /// 7612 // learning // traceable a…	---	---
2505	143704_s_at	0.660977	3.79325	5.1892	1.2e-05	4.35e-05	2.4646	FBgn0013301 /// FBgn0013300	CG4479 /// CG4478	Mst35Bb /// Mst35Ba	Male-specific-transcript-35Bb /// Male-specific-transcript-35Ba	34866 /// 34867	3677 // DNA binding // inferred from sequence or structural similarity /// 3677 // DNA binding // inferred from sequence similarity	---	---	IPR010477 // Protein of unknown function DUF1074 // 8.3E-87 /// IPR010477 // Protein of unknown function DUF1074 // 2.8E-87 /// IPR010477 // Protein of unknown function DUF1074 // 7.2E-87
1927	143126_at	0.660695	1.89772	6.13185	7.95e-07	3.99e-06	5.17322	FBgn0000472	CG10798	dm	diminutive	31310	3677 // DNA binding // inferred from direct assay /// 3700 // transcription factor activity // inferred from direct assay /// 3700 // transcription factor activity // inferred from sequence or structural similarity /// 5515 // protein binding // inferred from physical interaction /// 3677 // DNA binding // inferred from electronic annotation /// 30528 // transcription regulator activity // inferr…	74 // regulation of progression through cell cycle // traceable author statement /// 6355 // regulation of transcription, DNA-dependent // inferred from direct assay /// 8283 // cell proliferation // inferred from expression pattern /// 8361 // regulation of cell size // traceable author statement /// 9792 // embryonic development (sensu Metazoa) // inferred from expression pattern /// 9993 // oo…	5634 // nucleus // inferred from sequence or structural similarity /// 5634 // nucleus // inferred from electronic annotation /// 5634 // nucleus // inferred from sequence similarity	IPR001092 // Basic helix-loop-helix dimerization domain bHLH // 3.7E-13
4197	145396_at	0.660603	-0.587306	9.93373	3.21e-11	6.39e-10	15.3672	FBgn0031070	CG12702	CG12702	CG12702	32993	---	---	---	---
349	141548_at	0.660567	1.22705	5.67354	2.97e-06	1.27e-05	3.8571	FBgn0029095	CG4276	aru	arouser	33268	3735 // structural constituent of ribosome // inferred from electronic annotation	6412 // protein biosynthesis // inferred from electronic annotation /// 7173 // epidermal growth factor receptor signaling pathway // inferred from sequence or structural similarity /// 7173 // epidermal growth factor receptor signaling pathway // non-traceable author statement /// 7173 // epidermal growth factor receptor signaling pathway // inferred from sequence similarity	5622 // intracellular // inferred from electronic annotation /// 5840 // ribosome // inferred from electronic annotation	IPR001452 // SH3 // 1.1E-6 /// IPR001452 // SH3 // 1.1E-6
831	142030_at	0.660536	0.0792887	9.12618	2.37e-10	3.66e-09	13.3468	---	---	---	---	---	---	---	---	---
7142	148341_at	0.660272	0.703314	7.10167	5.15e-08	3.8e-07	7.92068	FBgn0035790	CG8540	Cyp316a1	Cyp316a1	38840	4497 // monooxygenase activity // inferred from electronic annotation /// 16491 // oxidoreductase activity // inferred from electronic annotation	6118 // electron transport // inferred from electronic annotation /// 8202 // steroid metabolism // inferred from electronic annotation	5792 // microsome // non-traceable author statement /// 16020 // membrane // non-traceable author statement	IPR001128 // Cytochrome P450 // 2.1E-19
9977	151176_at	0.659823	-0.387034	10.6418	5.97e-12	1.46e-10	17.0681	FBgn0040699	CG15024	CG15024	CG15024	50172	---	---	---	---
12714	153913_at	0.659226	2.84411	8.0693	3.7e-09	3.98e-08	10.5751	FBgn0029996	CG2257	Ubc-E2H	Ubc-E2H	31728	4840 // ubiquitin conjugating enzyme activity // inferred from sequence or structural similarity /// 16874 // ligase activity // inferred from electronic annotation /// 5515 // protein binding // inferred from physical interaction /// 4842 // ubiquitin-protein ligase activity // inferred from electronic annotation /// 4840 // ubiquitin conjugating enzyme activity // inferred from sequence similar…	6464 // protein modification // inferred from electronic annotation /// 6512 // ubiquitin cycle // inferred from electronic annotation /// 19538 // protein metabolism // inferred from electronic annotation	---	IPR000608 // Ubiquitin-conjugating enzymes // 1.1E-51
1629	142828_at	0.658933	-0.3709	8.4269	1.44e-09	1.77e-08	11.5287	---	---	---	---	---	---	---	---	---
1155	142354_at	0.658712	1.45588	5.16329	1.29e-05	4.66e-05	2.39025	FBgn0053056	CG33056	CG33056	CG33056	326246	5515 // protein binding // inferred from physical interaction	---	---	---
2241	143440_at	0.658536	2.29236	5.45947	5.5e-06	2.19e-05	3.24124	FBgn0004227	CG4211	nonA	no on or off transient A	32603	3729 // mRNA binding // inferred from sequence or structural similarity /// 3729 // mRNA binding // non-traceable author statement /// 3729 // mRNA binding // traceable author statement /// 8187 // poly-pyrimidine tract binding // inferred from sequence or structural similarity /// 30528 // transcription regulator activity // inferred from electronic annotation /// 166 // nucleotide binding // in…	398 // nuclear mRNA splicing, via spliceosome // inferred from sequence or structural similarity /// 7498 // mesoderm development // inferred from electronic annotation /// 7601 // visual perception // non-traceable author statement /// 7601 // visual perception // traceable author statement /// 7632 // visual behavior // non-traceable author statement /// 30097 // hemopoiesis // inferred from el…	5681 // spliceosome complex // inferred from sequence or structural similarity /// 5681 // spliceosome complex // inferred from sequence similarity	IPR000504 // RNA-binding region RNP-1 (RNA recognition motif) // 3.2E-20 /// IPR000504 // RNA-binding region RNP-1 (RNA recognition motif) // 1.9E-13
9212	150411_at	0.657697	0.686678	9.07918	2.67e-10	4.07e-09	13.2266	FBgn0039038	CG6688	CG6688	CG6688	42716	4842 // ubiquitin-protein ligase activity // inferred from electronic annotation /// 5515 // protein binding // inferred from electronic annotation /// 8270 // zinc ion binding // inferred from electronic annotation	16567 // protein ubiquitination // inferred from electronic annotation	151 // ubiquitin ligase complex // inferred from electronic annotation	IPR001478 // PDZ/DHR/GLGF domain // 2.8E-7
8676	149875_at	0.657483	1.51493	7.17322	4.23e-08	3.21e-07	8.12033	FBgn0038202	CG12402	CG12402	CG12402	41714	---	---	---	IPR001611 // Leucine-rich repeat // 0.039 /// IPR001611 // Leucine-rich repeat // 0.013 /// IPR001611 // Leucine-rich repeat // 0.085 /// IPR001810 // Cyclin-like F-box // 4.0E-10
8782	149981_at	0.657164	2.09322	5.75652	2.34e-06	1.03e-05	4.09575	FBgn0038373	CG4546	CG4546	CG4546	41922	4054 // arginine kinase activity // inferred from sequence or structural similarity /// 19202 // amino acid kinase activity // inferred from electronic annotation /// 5515 // protein binding // inferred from physical interaction /// 16301 // kinase activity // inferred from electronic annotation /// 16740 // transferase activity // inferred from electronic annotation /// 16772 // transferase acti…	---	---	IPR000749 // ATP:guanido phosphotransferase // 1.2E-14 /// IPR000749 // ATP:guanido phosphotransferase // 1.1E-94
2618	143817_at	0.656204	1.41342	6.80834	1.17e-07	7.72e-07	7.09723	FBgn0015550	CG7659	tap	target of Poxn	39935	3704 // specific RNA polymerase II transcription factor activity // non-traceable author statement /// 5515 // protein binding // inferred from physical interaction /// 3677 // DNA binding // inferred from electronic annotation /// 30528 // transcription regulator activity // inferred from electronic annotation	6357 // regulation of transcription from RNA polymerase II promoter // non-traceable author statement /// 7398 // ectoderm development // inferred from electronic annotation /// 7423 // sensory organ development // traceable author statement /// 8283 // cell proliferation // inferred from electronic annotation /// 6350 // transcription // inferred from electronic annotation /// 6355 // regulation…	5634 // nucleus // non-traceable author statement /// 5634 // nucleus // inferred from electronic annotation	IPR001092 // Basic helix-loop-helix dimerization domain bHLH // 2.2E-20
8544	149743_at	0.655774	0.761837	6.51308	2.69e-07	1.57e-06	6.26121	FBgn0038005	CG15807	Cyp313a5	Cyp313a5	41486	4497 // monooxygenase activity // inferred from electronic annotation /// 16491 // oxidoreductase activity // inferred from electronic annotation /// 5506 // iron ion binding // inferred from electronic annotation /// 20037 // heme binding // inferred from electronic annotation /// 46872 // metal ion binding // inferred from electronic annotation	6118 // electron transport // inferred from electronic annotation /// 8202 // steroid metabolism // inferred from electronic annotation	5792 // microsome // non-traceable author statement /// 16020 // membrane // non-traceable author statement	IPR001128 // Cytochrome P450 // 5.2E-58
4317	145516_at	0.655493	1.00299	7.34786	2.61e-08	2.12e-07	8.60555	FBgn0031232	CG11617	CG11617	CG11617	33183	3700 // transcription factor activity // inferred from sequence or structural similarity /// 3677 // DNA binding // inferred from electronic annotation /// 3700 // transcription factor activity // inferred from electronic annotation /// 43565 // sequence-specific DNA binding // inferred from electronic annotation /// 3700 // transcription factor activity // inferred from sequence similarity	6355 // regulation of transcription, DNA-dependent // inferred from electronic annotation /// 6350 // transcription // inferred from electronic annotation /// 7275 // development // inferred from electronic annotation /// 45449 // regulation of transcription // inferred from electronic annotation	5634 // nucleus // inferred from sequence or structural similarity /// 5634 // nucleus // inferred from electronic annotation /// 5634 // nucleus // inferred from sequence similarity	IPR001356 // Homeobox // 2.8E-8
13977	AFFX-DapX-5_at	0.655444	0.0478212	8.85813	4.7e-10	6.58e-09	12.6573	---	---	---	---	---	3677 // DNA binding // inferred from electronic annotation /// 3824 // catalytic activity // inferred from electronic annotation /// 4077 // biotin-[acetyl-CoA-carboxylase] ligase activity // inferred from electronic annotation /// 16564 // transcriptional repressor activity // inferred from electronic annotation /// 16874 // ligase activity // inferred from electronic annotation /// 8839 // dihy…	6350 // transcription // inferred from electronic annotation /// 6355 // regulation of transcription, DNA-dependent // inferred from electronic annotation /// 6464 // protein modification // inferred from electronic annotation /// 8652 // amino acid biosynthesis // inferred from electronic annotation /// 9085 // lysine biosynthesis // inferred from electronic annotation /// 9089 // lysine biosynt…	5737 // cytoplasm // inferred from electronic annotation /// 16020 // membrane // inferred from electronic annotation /// 16021 // integral to membrane // inferred from electronic annotation	---
10491	151690_at	0.655368	1.05578	6.81213	1.16e-07	7.66e-07	7.10793	FBgn0002962	CG5637	nos	nanos	42297	3729 // mRNA binding // traceable author statement /// 5515 // protein binding // inferred from physical interaction /// 5515 // protein binding // traceable author statement /// 8270 // zinc ion binding // inferred from electronic annotation	1709 // cell fate determination // traceable author statement /// 6378 // mRNA polyadenylylation // traceable author statement /// 7280 // pole cell migration // traceable author statement /// 7281 // germ cell development // inferred from mutant phenotype /// 7281 // germ cell development // traceable author statement /// 7283 // spermatogenesis // inferred from mutant phenotype /// 7314 // oocy…	45495 // pole plasm // traceable author statement	IPR008705 // Nanos RNA-binding // 3.3E-36
2916	144115_at	0.655092	2.378	4.95745	2.34e-05	7.9e-05	1.80092	FBgn0026084	CG4944	cib	ciboulot	31359	3779 // actin binding // inferred from sequence or structural similarity /// 3785 // actin monomer binding // inferred from direct assay /// 3779 // actin binding // inferred from electronic annotation /// 3779 // actin binding // inferred from sequence similarity	7010 // cytoskeleton organization and biogenesis // inferred from electronic annotation /// 7420 // brain development // inferred from mutant phenotype /// 35193 // central nervous system remodeling (sensu Insecta) // inferred from mutant phenotype	5829 // cytosol // inferred from direct assay /// 5737 // cytoplasm // inferred from electronic annotation	IPR001152 // Thymosin beta-4 // 2.5E-10 /// IPR001152 // Thymosin beta-4 // 1.2E-11
1542	142741_at	0.654792	-0.0927994	9.51415	8.99e-11	1.55e-09	14.3282	FBgn0050101	CG30101	CG30101	CG30101	36950	5515 // protein binding // inferred from physical interaction	---	---	---
1389	142588_at	0.654661	1.41433	5.74309	2.43e-06	1.07e-05	4.05714	FBgn0035772	CG8582	Sh3	Sh3	38820	4785 // copper, zinc superoxide dismutase activity // inferred from electronic annotation /// 46872 // metal ion binding // inferred from electronic annotation	6801 // superoxide metabolism // inferred from electronic annotation	---	IPR006993 // SH3-binding, glutamic acid-rich protein // 1.5E-72
12207	153406_at	0.652846	2.2027	7.06009	5.79e-08	4.2e-07	7.80442	FBgn0017578	CG9648	Max	Max	40095	3700 // transcription factor activity // inferred from direct assay /// 3700 // transcription factor activity // inferred from sequence or structural similarity /// 5515 // protein binding // inferred from physical interaction /// 3677 // DNA binding // inferred from electronic annotation /// 30528 // transcription regulator activity // inferred from electronic annotation /// 3700 // transcriptio…	6355 // regulation of transcription, DNA-dependent // inferred from direct assay /// 6357 // regulation of transcription from RNA polymerase II promoter // inferred from electronic annotation /// 45449 // regulation of transcription // inferred from sequence or structural similarity /// 6350 // transcription // inferred from electronic annotation /// 6355 // regulation of transcription, DNA-depen…	5634 // nucleus // Unknown /// 5634 // nucleus // inferred from sequence or structural similarity /// 5634 // nucleus // inferred from electronic annotation /// 5634 // nucleus // inferred from curator /// 5634 // nucleus // inferred from sequence similarity	IPR001092 // Basic helix-loop-helix dimerization domain bHLH // 4.2E-18
10242	151441_at	0.652776	0.245894	7.0282	6.32e-08	4.52e-07	7.71515	---	---	---	---	---	---	---	---	---
6360	147559_at	0.652479	1.06302	5.39573	6.61e-06	2.58e-05	3.05794	FBgn0034532	CG13436	CG13436	CG13436	37334	---	---	---	---
12030	153229_at	0.652075	0.539256	9.10207	2.52e-10	3.87e-09	13.2852	FBgn0052636	CG32636	CG32636	CG32636	50336	---	---	---	---
10134	151333_at	0.651838	1.37564	6.52897	2.57e-07	1.51e-06	6.30636	---	---	---	---	---	---	---	---	---
10100	151299_at	0.651681	0.29249	7.95137	5.07e-09	5.2e-08	10.2572	FBgn0052048	CG32048	CG32048	CG32048	39111	---	---	---	IPR006020 // Phosphotyrosine interaction domain // 8.2E-33
12323	153522_at	0.651355	2.42204	6.08461	9.11e-07	4.49e-06	5.03787	FBgn0000384	---	cta	concertina	---	166 // nucleotide binding // inferred from electronic annotation /// 4871 // signal transducer activity // inferred from electronic annotation /// 5525 // GTP binding // inferred from electronic annotation /// 19001 // guanyl nucleotide binding // inferred from electronic annotation /// 3924 // GTPase activity // inferred from sequence similarity /// 19001 // guanyl nucleotide binding // non-trac…	10004 // gastrulation (sensu Insecta) // inferred from mutant phenotype /// 16476 // shape changes of embryonic cells // inferred from mutant phenotype /// 7165 // signal transduction // inferred from electronic annotation /// 7186 // G-protein coupled receptor protein signaling pathway // inferred from electronic annotation /// 7275 // development // inferred from electronic annotation /// 7369 …	5834 // heterotrimeric G-protein complex // non-traceable author statement /// 5834 // heterotrimeric G-protein complex // inferred from sequence similarity	IPR001019 // Guanine nucleotide binding protein (G-protein), alpha subunit // 1.0E-126
2831	144030_at	0.65132	1.08979	5.57221	3.97e-06	1.64e-05	3.56556	FBgn0024913	CG11062	activin-	activin-	43826	5160 // transforming growth factor beta receptor binding // inferred from sequence or structural similarity /// 5160 // transforming growth factor beta receptor binding // non-traceable author statement /// 8083 // growth factor activity // inferred from electronic annotation /// 5160 // transforming growth factor beta receptor binding // inferred from sequence similarity	7178 // transmembrane receptor protein serine/threonine kinase signaling pathway // inferred from electronic annotation /// 7267 // cell-cell signaling // inferred from electronic annotation /// 16049 // cell growth // non-traceable author statement /// 16358 // dendrite development // non-traceable author statement	5576 // extracellular region // non-traceable author statement /// 5576 // extracellular region // inferred from electronic annotation	IPR001839 // Transforming growth factor beta // 5.9E-35
5139	146338_at	0.650423	-0.0317103	8.03561	4.05e-09	4.29e-08	10.4844	FBgn0032523	CG16956	CG16956	CG16956	34760	---	---	---	---
12415	153614_at	0.65042	1.43324	5.59244	3.75e-06	1.56e-05	3.62378	FBgn0022981	CG1058	rpk	ripped pocket	40580	5272 // sodium channel activity // inferred from sequence or structural similarity /// 5272 // sodium channel activity // non-traceable author statement /// 15280 // amiloride-sensitive sodium channel activity // inferred from sequence or structural similarity /// 5216 // ion channel activity // inferred from electronic annotation /// 5272 // sodium channel activity // inferred from electronic an…	6812 // cation transport // inferred from electronic annotation /// 6814 // sodium ion transport // inferred from electronic annotation /// 6810 // transport // inferred from electronic annotation /// 6811 // ion transport // inferred from electronic annotation	16020 // membrane // inferred from electronic annotation /// 16021 // integral to membrane // inferred from electronic annotation	IPR001873 // Na+ channel, amiloride-sensitive // 1.0E-126
9365	150564_at	0.650319	-0.26429	10.1863	1.75e-11	3.76e-10	15.9813	FBgn0039295	CG13664	CG13664	CG13664	43033	---	---	---	---
6135	147334_at	0.650015	-0.223836	6.89198	9.25e-08	6.29e-07	7.33281	FBgn0034160	CG5550	CG5550	CG5550	36883	5102 // receptor binding // inferred from electronic annotation	42742 // defense response to bacteria // inferred from electronic annotation	5578 // extracellular matrix (sensu Metazoa) // inferred from sequence or structural similarity /// 5578 // extracellular matrix (sensu Metazoa) // inferred from sequence similarity	IPR002181 // Fibrinogen, beta/gamma chain, C-terminal globular // 4.3E-62
10416	151615_at	0.649575	1.42541	6.88411	9.45e-08	6.42e-07	7.31065	FBgn0036522	CG7372	CG7372	CG7372	39697	3676 // nucleic acid binding // inferred from electronic annotation /// 8270 // zinc ion binding // inferred from electronic annotation /// 30528 // transcription regulator activity // inferred from electronic annotation	6139 // nucleobase, nucleoside, nucleotide and nucleic acid metabolism // inferred from electronic annotation /// 6357 // regulation of transcription from RNA polymerase II promoter // inferred from electronic annotation /// 6366 // transcription from RNA polymerase II promoter // inferred from electronic annotation /// 8283 // cell proliferation // inferred from electronic annotation	5634 // nucleus // inferred from electronic annotation	IPR007087 // Zn-finger, C2H2 type // 1.1E-4 /// IPR007087 // Zn-finger, C2H2 type // 1.3E-6 /// IPR007087 // Zn-finger, C2H2 type // 5.7E-6 /// IPR007087 // Zn-finger, C2H2 type // 1.5E-5
9605	150804_at	0.648924	-0.386493	8.87671	4.48e-10	6.32e-09	12.7054	FBgn0039633	CG11873	CG11873	CG11873	43435	---	---	---	---
12598	153797_at	0.648451	1.40722	6.36177	4.13e-07	2.27e-06	5.83039	FBgn0025355	CG7869	SuUR	Suppressor of Under-Replication	45739	3682 // chromatin binding // inferred from direct assay /// 5524 // ATP binding // inferred from electronic annotation /// 5515 // protein binding // inferred from physical interaction /// 3677 // DNA binding // inferred from electronic annotation	6260 // DNA replication // inferred from expression pattern /// 6333 // chromatin assembly or disassembly // inferred from expression pattern /// 8156 // negative regulation of DNA replication // traceable author statement /// 42023 // DNA endoreduplication // inferred from mutant phenotype /// 7275 // development // inferred from electronic annotation /// 16568 // chromatin modification // infer…	775 // chromosome, pericentric region // traceable author statement /// 792 // heterochromatin // traceable author statement /// 5700 // polytene chromosome // inferred from direct assay /// 5700 // polytene chromosome // traceable author statement /// 5721 // centric heterochromatin // inferred from direct assay /// 5724 // nuclear telomeric heterochromatin // inferred from direct assay /// 5725…	IPR000330 // SNF2 related domain // 9.9E-5
[truncated: 2,805 more rows]
