# Supplementary material for: Gene expression changes in response to aging compared to heat stress, oxidative stress and ionizing radiation in Drosophila melanogaster
Source: Aging (Albany NY). 2012 Nov 30;4(11):768–89. doi: 10.18632/aging.100499 (PMC3560439; doi:10.18632/aging.100499)
Supplement: Supplementary file 12 [file aging-04-768-s012.xlsx]

## Sheet: TableS4h.H2O2down
Table S4h. H2O2 down
ID	M	A	t	P.Value	adj.P.Val	B	FlyBase	Ensembl	Gene.Symbol	Gene.Title	Entrez.Gene	Gene.Ontology.Molecular.Function	Gene.Ontology.Biological.Process	Gene.Ontology.Cellular.Component	InterPro
2142	143341_at	-3.21384	2.38511	-26.2897	5.65212e-23	7.19874e-20	42.3528	FBgn0003358	CG31039	Jon99Ci	Jonah 99Ci	43545	4252 // serine-type endopeptidase activity // inferred from sequence or structural similarity /// 4252 // serine-type endopeptidase activity // non-traceable author statement /// 4263 // chymotrypsin activity // inferred from electronic annotation /// 4295 // trypsin activity // inferred from electronic annotation /// 42708 // elastase activity // non-traceable author statement /// 4252 // serine…	6508 // proteolysis // non-traceable author statement /// 7586 // digestion // non-traceable author statement /// 6508 // proteolysis // inferred from electronic annotation	---	IPR001254 // Peptidase S1, chymotrypsin // 4.8E-60
5359	146558_at	-1.89355	1.14103	-25.1286	2.19798e-22	2.34256e-19	41.0353	FBgn0032896	CG14400	CG14400	CG14400	35354	---	---	---	---
7764	148963_at	-4.15701	3.66247	-24.4115	5.23325e-22	4.88786e-19	40.1904	FBgn0023197	CG6298	Jon74E	Jonah 74E	39959	4263 // chymotrypsin activity // inferred from sequence or structural similarity /// 4263 // chymotrypsin activity // non-traceable author statement /// 4295 // trypsin activity // inferred from electronic annotation /// 4263 // chymotrypsin activity // inferred from sequence similarity	6508 // proteolysis // non-traceable author statement	---	IPR001254 // Peptidase S1, chymotrypsin // 9.2E-56 /// IPR001254 // Peptidase S1, chymotrypsin // 1.5E-43
4251	145450_at	-1.50297	0.34687	-23.0649	2.84443e-21	1.89764e-18	38.5348	FBgn0031141	CG1304	CG1304	CG1304	33074	4252 // serine-type endopeptidase activity // inferred from sequence or structural similarity /// 4252 // serine-type endopeptidase activity // non-traceable author statement /// 4263 // chymotrypsin activity // inferred from electronic annotation /// 4295 // trypsin activity // inferred from electronic annotation /// 4252 // serine-type endopeptidase activity // inferred from electronic annotati…	6508 // proteolysis // non-traceable author statement /// 6508 // proteolysis // inferred from electronic annotation	---	IPR001254 // Peptidase S1, chymotrypsin // 1.3E-63
2713	143912_at	-2.01048	3.63405	-22.8267	3.87312e-21	2.46647e-18	38.232	FBgn0020236	CG8322	ATPCL	ATP citrate lyase	36760	3878 // ATP citrate synthase activity // inferred from sequence or structural similarity /// 3878 // ATP citrate synthase activity // non-traceable author statement /// 16829 // lyase activity // inferred from electronic annotation /// 3824 // catalytic activity // inferred from electronic annotation /// 3878 // ATP citrate synthase activity // inferred from sequence similarity	6085 // acetyl-CoA biosynthesis // inferred from sequence or structural similarity /// 6099 // tricarboxylic acid cycle // inferred from electronic annotation /// 6101 // citrate metabolism // inferred from sequence or structural similarity /// 8152 // metabolism // inferred from electronic annotation /// 6085 // acetyl-CoA biosynthesis // inferred from sequence similarity /// 6101 // citrate met…	5737 // cytoplasm // inferred from sequence or structural similarity /// 5737 // cytoplasm // inferred from sequence similarity	IPR003781 // CoA-binding domain // 2.1E-15 /// IPR005811 // ATP-citrate lyase/succinyl-CoA ligase // 4.7E-47 /// IPR003781 // CoA-binding domain // 4.8E-21 /// IPR005811 // ATP-citrate lyase/succinyl-CoA ligase // 4.7E-47
9378	150577_at	-2.59357	2.426	-22.5506	5.55864e-21	3.38594e-18	37.8773	FBgn0051104	CG31104	CG31104	CG31104	43054	16301 // kinase activity // inferred from electronic annotation /// 16740 // transferase activity // inferred from electronic annotation	---	---	IPR004119 // Protein of unknown function DUF227 // 7.8E-101
116	141315_at	-2.96326	4.29463	-21.4306	2.50922e-20	1.31082e-17	36.3936	FBgn0040732	CG16926	CG16926	CG16926	50205	5515 // protein binding // inferred from physical interaction	---	---	---
10997	152196_at	-1.55995	1.82689	-21.3574	2.77542e-20	1.3887e-17	36.2942	FBgn0027562	CG10345	CG10345	CG10345	42017	5044 // scavenger receptor activity // non-traceable author statement	6915 // apoptosis // inferred from electronic annotation /// 6952 // defense response // non-traceable author statement /// 7155 // cell adhesion // inferred from electronic annotation	5887 // integral to plasma membrane // non-traceable author statement /// 16020 // membrane // inferred from electronic annotation	IPR002159 // CD36 antigen // 1.8E-30 /// IPR002159 // CD36 antigen // 2.3E-21
8700	149899_at	-1.96064	2.82671	-20.7982	6.05997e-20	2.92759e-17	35.523	FBgn0038236	CG3360	Cyp313a1	Cyp313a1	41759	3735 // structural constituent of ribosome // inferred from electronic annotation /// 4497 // monooxygenase activity // inferred from electronic annotation /// 16491 // oxidoreductase activity // inferred from electronic annotation	6118 // electron transport // inferred from electronic annotation /// 6412 // protein biosynthesis // inferred from electronic annotation /// 8202 // steroid metabolism // inferred from electronic annotation /// 17143 // insecticide metabolism // non-traceable author statement	5622 // intracellular // inferred from electronic annotation /// 5792 // microsome // non-traceable author statement /// 5840 // ribosome // inferred from electronic annotation /// 16020 // membrane // non-traceable author statement	IPR001128 // Cytochrome P450 // 5.5E-5 /// IPR001128 // Cytochrome P450 // 4.8E-59
8395	149594_at	-1.45162	2.50742	-20.6164	7.84197e-20	3.23135e-17	35.2681	FBgn0037764	CG9459	CG9459	CG9459	41213	8415 // acyltransferase activity // inferred from electronic annotation /// 16740 // transferase activity // inferred from electronic annotation	6629 // lipid metabolism // inferred from electronic annotation /// 6631 // fatty acid metabolism // inferred from electronic annotation	16021 // integral to membrane // inferred from electronic annotation	---
11374	152573_at	-2.13561	3.6154	-20.6269	7.72667e-20	3.23135e-17	35.2828	---	CG10096 /// CG10097	---	---	---	---	---	---	---
5816	147015_at	-1.4374	1.58957	-20.5254	8.92879e-20	3.50325e-17	35.1397	FBgn0043471	CG12388	Try	Try	36215	4252 // serine-type endopeptidase activity // non-traceable author statement /// 4263 // chymotrypsin activity // inferred from electronic annotation /// 4295 // trypsin activity // inferred from electronic annotation	6508 // proteolysis // inferred from electronic annotation	---	IPR001254 // Peptidase S1, chymotrypsin // 4.3E-67
8416	149615_at	-1.68461	1.58516	-20.5197	9.00192e-20	3.50325e-17	35.1317	FBgn0037788	CG3940	CG3940	CG3940	41238	4089 // carbonate dehydratase activity // inferred from sequence or structural similarity /// 8270 // zinc ion binding // inferred from electronic annotation /// 4089 // carbonate dehydratase activity // inferred from electronic annotation /// 4089 // carbonate dehydratase activity // inferred from sequence similarity	6730 // one-carbon compound metabolism // inferred from electronic annotation	---	IPR001148 // Carbonic anhydrase, eukaryotic // 7.7E-20 /// IPR001148 // Carbonic anhydrase, eukaryotic // 2.0E-14
5250	146449_at	-1.53001	1.42504	-20.4624	9.77178e-20	3.6027e-17	35.0505	FBgn0032706	CG10369	Irk3	Inwardly rectifying potassium channel 3	35131	5242 // inward rectifier potassium channel activity // inferred from sequence or structural similarity /// 5242 // inward rectifier potassium channel activity // non-traceable author statement /// 5216 // ion channel activity // inferred from electronic annotation /// 5242 // inward rectifier potassium channel activity // inferred from electronic annotation /// 5242 // inward rectifier potassium …	6812 // cation transport // inferred from electronic annotation /// 6813 // potassium ion transport // inferred from electronic annotation	16020 // membrane // inferred from electronic annotation	IPR001838 // K+ channel, inward rectifier // 4.1E-83
5112	146311_at	-3.28378	3.74234	-20.3088	1.21861e-19	4.26819e-17	34.8319	FBgn0032472	CG9928	CG9928	CG9928	34704	5515 // protein binding // inferred from physical interaction	---	---	---
11066	152265_at	-2.27341	2.63127	-20.1088	1.6281e-19	5.56333e-17	34.545	FBgn0039313	CG11892	CG11892	CG11892	43053	5515 // protein binding // inferred from physical interaction /// 16301 // kinase activity // inferred from electronic annotation /// 16740 // transferase activity // inferred from electronic annotation	---	---	IPR004119 // Protein of unknown function DUF227 // 5.1E-119
10738	151937_at	-1.7563	3.04391	-20.0856	1.68392e-19	5.61707e-17	34.5116	FBgn0037387	CG1213	CG1213	CG1213	40728	5351 // sugar porter activity // inferred from electronic annotation /// 5355 // glucose transporter activity // inferred from sequence or structural similarity /// 5515 // protein binding // inferred from physical interaction /// 5215 // transporter activity // inferred from electronic annotation /// 5355 // glucose transporter activity // inferred from sequence similarity	5975 // carbohydrate metabolism // inferred from electronic annotation /// 8643 // carbohydrate transport // inferred from electronic annotation /// 6810 // transport // inferred from electronic annotation	16020 // membrane // inferred from electronic annotation /// 16021 // integral to membrane // inferred from electronic annotation	IPR005828 // General substrate transporter // 1.2E-81
1157	142356_at	-2.47089	5.20913	-19.5699	3.59782e-19	1.05011e-16	33.7588	FBgn0016724	CG11064	RfaBp	Retinoid- and fatty-acid binding protein	43827	5198 // structural molecule activity // inferred from sequence or structural similarity /// 5319 // lipid transporter activity // inferred from electronic annotation /// 5501 // retinoid binding // non-traceable author statement /// 5504 // fatty acid binding // non-traceable author statement /// 8017 // microtubule binding // inferred from direct assay /// 19841 // retinol binding // inferred fr…	6810 // transport // traceable author statement /// 6869 // lipid transport // inferred from electronic annotation /// 7224 // smoothened signaling pathway // inferred from mutant phenotype /// 16055 // Wnt receptor signaling pathway // inferred from mutant phenotype /// 6810 // transport // inferred from electronic annotation /// 16055 // Wnt receptor signaling pathway // inferred from electroni…	5576 // extracellular region // non-traceable author statement	IPR009454 // Protein of unknown function DUF1081 // 3.0E-55 /// IPR001846 // von Willebrand factor, type D // 2.9E-29 /// IPR001747 // Lipid transport protein, N-terminal // 7.1E-119
6273	147472_at	-1.51567	3.57893	-19.3972	4.65731e-19	1.30498e-16	33.5025	FBgn0034405	CG15102	Jheh2	Juvenile hormone epoxide hydrolase 2	37181	4301 // epoxide hydrolase activity // inferred from sequence or structural similarity /// 8096 // juvenile hormone epoxide hydrolase activity // non-traceable author statement /// 5515 // protein binding // inferred from physical interaction /// 3824 // catalytic activity // inferred from electronic annotation /// 4301 // epoxide hydrolase activity // inferred from electronic annotation /// 16787…	6719 // juvenile hormone catabolism // non-traceable author statement /// 6952 // defense response // inferred from electronic annotation /// 9636 // response to toxin // inferred from electronic annotation /// 19439 // aromatic compound catabolism // inferred from electronic annotation	5792 // microsome // inferred from sequence or structural similarity /// 5783 // endoplasmic reticulum // inferred from electronic annotation /// 5792 // microsome // inferred from electronic annotation /// 16020 // membrane // inferred from electronic annotation /// 16021 // integral to membrane // inferred from electronic annotation /// 5792 // microsome // inferred from sequence similarity	IPR000073 // Alpha/beta hydrolase fold // 9.3E-13 /// IPR010497 // Epoxide hydrolase, N-terminal // 1.7E-69 /// IPR010497 // Epoxide hydrolase, N-terminal // 2.2E-37
5919	147118_at	-2.7814	3.41103	-18.9802	8.75682e-19	2.31477e-16	32.8752	FBgn0033774	CG12374	CG12374	CG12374	36410	4182 // carboxypeptidase A activity // inferred from sequence or structural similarity /// 5515 // protein binding // inferred from physical interaction /// 4180 // carboxypeptidase activity // inferred from electronic annotation /// 4182 // carboxypeptidase A activity // inferred from electronic annotation /// 4182 // carboxypeptidase A activity // inferred from sequence similarity	6508 // proteolysis // inferred from electronic annotation	---	IPR000834 // Peptidase M14, carboxypeptidase A // 4.3E-52
11415	152614_at	-1.80339	2.7979	-18.7995	1.15542e-18	2.99766e-16	32.5995	FBgn0031702	CG14021	CG14021	CG14021	33765	---	---	---	---
5388	146587_at	-2.65039	2.22396	-18.7326	1.28095e-18	3.20466e-16	32.4969	FBgn0032947	CG17571	CG17571	CG17571	35409	4252 // serine-type endopeptidase activity // inferred from sequence or structural similarity /// 4263 // chymotrypsin activity // inferred from electronic annotation /// 4295 // trypsin activity // non-traceable author statement /// 4252 // serine-type endopeptidase activity // inferred from sequence similarity	6508 // proteolysis // non-traceable author statement	---	IPR001254 // Peptidase S1, chymotrypsin // 3.6E-83
7479	148678_at	-1.59235	1.54758	-18.662	1.42891e-18	3.45155e-16	32.3881	FBgn0036321	CG14120	CG14120	CG14120	39463	---	---	---	IPR001604 // DNA/RNA non-specific endonuclease // 7.9E-29 /// IPR001604 // DNA/RNA non-specific endonuclease // 1.8E-14 /// IPR001604 // DNA/RNA non-specific endonuclease // 5.3E-34
12061	153260_at	-1.52352	2.29434	-18.6669	1.41812e-18	3.45155e-16	32.3957	FBgn0026061	CG4123	Mipp1	Multiple inositol polyphosphate phosphatase 1	39841	3993 // acid phosphatase activity // inferred from electronic annotation /// 4437 // inositol or phosphatidylinositol phosphatase activity // inferred from sequence or structural similarity /// 4721 // phosphoprotein phosphatase activity // non-traceable author statement /// 4437 // inositol or phosphatidylinositol phosphatase activity // inferred from sequence similarity	---	---	---
4648	145847_at	-1.08647	0.970439	-18.6391	1.48042e-18	3.51537e-16	32.3529	FBgn0031741	CG11034	CG11034	CG11034	33810	4274 // dipeptidyl-peptidase IV activity // inferred from sequence or structural similarity /// 4274 // dipeptidyl-peptidase IV activity // inferred from sequence similarity	6508 // proteolysis // inferred from electronic annotation /// 7166 // cell surface receptor linked signal transduction // inferred from electronic annotation	16020 // membrane // inferred from electronic annotation	IPR001375 // Peptidase S9, prolyl oligopeptidase active site region // 2.5E-17 /// IPR002469 // Peptidase S9B, dipeptidylpeptidase IV N-terminal // 2.6E-60 /// IPR002469 // Peptidase S9B, dipeptidylpeptidase IV N-terminal // 1.2E-16
2461	143660_at	-2.07858	1.51962	-18.5901	1.59758e-18	3.73035e-16	32.2771	FBgn0011555	CG12385	Try	Trypsin	36218	4263 // chymotrypsin activity // inferred from electronic annotation /// 4295 // trypsin activity // inferred from sequence or structural similarity /// 4295 // trypsin activity // non-traceable author statement /// 4252 // serine-type endopeptidase activity // inferred from electronic annotation /// 4295 // trypsin activity // inferred from electronic annotation /// 8233 // peptidase activity //…	6508 // proteolysis // non-traceable author statement /// 6508 // proteolysis // inferred from electronic annotation	5576 // extracellular region // non-traceable author statement	IPR001254 // Peptidase S1, chymotrypsin // 5.3E-85
6128	147327_at	-2.25721	5.09981	-18.5606	1.67258e-18	3.7795e-16	32.2314	FBgn0034152	CG8626	Acp53C14a	Acp53C14a	36872	---	---	---	IPR009392 // Drosophila ACP53EA // 3.2E-11
12119	153318_at	-2.1576	3.23001	-18.5671	1.65578e-18	3.7795e-16	32.2415	FBgn0027348	CG4501	bgm	bubblegum	44117	4467 // long-chain-fatty-acid-CoA ligase activity // inferred from sequence or structural similarity /// 3824 // catalytic activity // inferred from electronic annotation /// 4467 // long-chain-fatty-acid-CoA ligase activity // inferred from sequence similarity	6631 // fatty acid metabolism // inferred from electronic annotation /// 8152 // metabolism // inferred from electronic annotation	---	IPR000873 // AMP-dependent synthetase and ligase // 1.5E-79
6154	147353_at	-1.92724	3.19826	-18.3818	2.21188e-18	4.84195e-16	31.9531	FBgn0034198	CG11400	CG11400	CG11400	36935	---	---	---	---
11028	152227_at	-1.58208	2.77106	-18.2006	2.94305e-18	6.06355e-16	31.6686	FBgn0038407	CG6126	CG6126	CG6126	41967	15101 // organic cation transporter activity // inferred from sequence or structural similarity /// 15144 // carbohydrate transporter activity // inferred from electronic annotation /// 5515 // protein binding // inferred from physical interaction /// 5215 // transporter activity // inferred from electronic annotation /// 15101 // organic cation transporter activity // inferred from sequence simi…	5975 // carbohydrate metabolism // inferred from electronic annotation /// 6812 // cation transport // inferred from electronic annotation /// 6858 // extracellular transport // inferred from electronic annotation /// 8643 // carbohydrate transport // inferred from electronic annotation /// 6810 // transport // inferred from electronic annotation	16020 // membrane // inferred from electronic annotation /// 16021 // integral to membrane // inferred from electronic annotation	IPR005828 // General substrate transporter // 1.0E-15
13764	154963_at	-1.51637	2.32095	-18.2079	2.90932e-18	6.06355e-16	31.6801	FBgn0032783	CG10237	CG10237	CG10237	35222	5386 // carrier activity // inferred from electronic annotation /// 8431 // vitamin E binding // inferred from sequence or structural similarity /// 16918 // retinal binding // inferred from sequence or structural similarity /// 5215 // transporter activity // inferred from electronic annotation /// 8431 // vitamin E binding // inferred from sequence similarity /// 16918 // retinal binding // inf…	6732 // coenzyme metabolism // inferred from electronic annotation /// 6810 // transport // inferred from electronic annotation /// 51189 // prosthetic group metabolism // inferred from electronic annotation	5622 // intracellular // inferred from electronic annotation	IPR001251 // Cellular retinaldehyde-binding)/triple function, C-terminal // 3.3E-36 /// IPR001251 // Cellular retinaldehyde-binding)/triple function, C-terminal // 3.3E-36 /// IPR001251 // Cellular retinaldehyde-binding)/triple function, C-terminal // 3.3E-36
266	141465_at	-1.62403	1.79992	-18.1682	3.09801e-18	6.28358e-16	31.6175	FBgn0032785	CG10026	CG10026	CG10026	35226	5386 // carrier activity // inferred from electronic annotation /// 8431 // vitamin E binding // inferred from sequence or structural similarity /// 16918 // retinal binding // inferred from sequence or structural similarity /// 5215 // transporter activity // inferred from electronic annotation /// 8431 // vitamin E binding // inferred from sequence similarity /// 16918 // retinal binding // inf…	6732 // coenzyme metabolism // inferred from electronic annotation /// 6810 // transport // inferred from electronic annotation /// 51189 // prosthetic group metabolism // inferred from electronic annotation	5622 // intracellular // inferred from electronic annotation	IPR001251 // Cellular retinaldehyde-binding)/triple function, C-terminal // 5.9E-26 /// IPR001251 // Cellular retinaldehyde-binding)/triple function, C-terminal // 5.9E-26
5187	146386_at	-1.2919	1.60306	-18.1452	3.2133e-18	6.34062e-16	31.5811	FBgn0032614	CG13284	CG13284	CG13284	35021	16229 // steroid dehydrogenase activity // inferred from sequence or structural similarity /// 16491 // oxidoreductase activity // inferred from electronic annotation /// 16229 // steroid dehydrogenase activity // inferred from sequence similarity	8202 // steroid metabolism // inferred from electronic annotation /// 8152 // metabolism // inferred from electronic annotation	---	IPR002198 // Short-chain dehydrogenase/reductase SDR // 1.1E-41 /// IPR002198 // Short-chain dehydrogenase/reductase SDR // 1.1E-41
1160	142359_at	-2.64842	3.3017	-18.1274	3.30501e-18	6.34291e-16	31.553	FBgn0050360	CG30360	CG30360	CG30360	246565	4556 // alpha-amylase activity // inferred from electronic annotation /// 5215 // transporter activity // inferred from electronic annotation /// 15926 // glucosidase activity // inferred from electronic annotation /// 16787 // hydrolase activity // inferred from electronic annotation	5975 // carbohydrate metabolism // inferred from electronic annotation	---	IPR006047 // Alpha amylase, catalytic domain // 3.4E-96 /// IPR006047 // Alpha amylase, catalytic domain // 4.6E-16 /// IPR006047 // Alpha amylase, catalytic domain // 3.0E-119
10161	151360_at	-1.80783	2.83051	-18.0226	3.90506e-18	7.39323e-16	31.3867	FBgn0040887	CG33254	CG33254	CG33254	2768869	---	---	---	---
4054	145253_at	-1.88116	1.93527	-17.9616	4.3048e-18	7.93557e-16	31.2895	FBgn0030859	CG12990	CG12990	CG12990	32747	16747 // transferase activity, transferring groups other than amino-acyl groups // inferred from electronic annotation	---	---	---
11243	152442_at	-1.88219	1.96775	-17.9067	4.70058e-18	8.55262e-16	31.2018	FBgn0051233	CG31233	CG31233	CG31233	42557	4179 // membrane alanyl aminopeptidase activity // inferred from sequence or structural similarity /// 4179 // membrane alanyl aminopeptidase activity // inferred from electronic annotation /// 4179 // membrane alanyl aminopeptidase activity // inferred from sequence similarity	6508 // proteolysis // inferred from electronic annotation	---	IPR001930 // Peptidase M1, membrane alanine aminopeptidase // 1.0E-126
6036	147235_at	-2.04164	1.98876	-17.8762	4.93654e-18	8.86678e-16	31.153	FBgn0033999	CG8093	CG8093	CG8093	36686	4806 // triacylglycerol lipase activity // inferred from sequence or structural similarity /// 16298 // lipase activity // inferred from sequence or structural similarity /// 5515 // protein binding // inferred from physical interaction /// 3824 // catalytic activity // inferred from electronic annotation /// 16787 // hydrolase activity // inferred from electronic annotation /// 16789 // carboxyl…	6629 // lipid metabolism // inferred from electronic annotation /// 6629 // lipid metabolism // inferred from sequence or structural similarity /// 16042 // lipid catabolism // inferred from electronic annotation /// 6629 // lipid metabolism // inferred from sequence similarity	---	IPR006693 // Ab-hydrolase associated lipase region // 2.1E-27
10601	151800_at	-1.94082	2.9106	-17.8557	5.10181e-18	9.04764e-16	31.1201	FBgn0034229	CG4847	CG4847	CG4847	36973	4216 // cathepsin K activity // inferred from sequence or structural similarity /// 8234 // cysteine-type peptidase activity // inferred from sequence or structural similarity /// 4197 // cysteine-type endopeptidase activity // inferred from electronic annotation /// 8233 // peptidase activity // inferred from electronic annotation /// 8234 // cysteine-type peptidase activity // inferred from ele…	6508 // proteolysis // inferred from electronic annotation /// 6508 // proteolysis // inferred from sequence or structural similarity /// 6508 // proteolysis // inferred from sequence similarity	---	IPR000668 // Peptidase C1A, papain // 2.7E-96 /// IPR000668 // Peptidase C1A, papain // 2.7E-96
11832	153031_at	-1.40656	4.16232	-17.7514	6.03634e-18	1.05711e-15	30.9523	FBgn0038037	CG11466	Cyp9f2	Cyp9f2	41520	4497 // monooxygenase activity // inferred from electronic annotation /// 16491 // oxidoreductase activity // inferred from electronic annotation /// 5506 // iron ion binding // inferred from electronic annotation /// 20037 // heme binding // inferred from electronic annotation /// 46872 // metal ion binding // inferred from electronic annotation	6118 // electron transport // inferred from electronic annotation	5792 // microsome // non-traceable author statement /// 16020 // membrane // non-traceable author statement /// 5783 // endoplasmic reticulum // inferred from electronic annotation /// 5792 // microsome // inferred from electronic annotation /// 16020 // membrane // inferred from electronic annotation	IPR001128 // Cytochrome P450 // 1.5E-76 /// IPR001128 // Cytochrome P450 // 1.5E-79
2265	143464_f_at	-3.75876	3.86708	-17.6096	7.59647e-18	1.29788e-15	30.7229	FBgn0004425	CG1179	LysB	Lysozyme B	38125	3796 // lysozyme activity // inferred from sequence or structural similarity /// 3796 // lysozyme activity // non-traceable author statement /// 3796 // lysozyme activity // inferred from sequence similarity	6960 // antimicrobial humoral response (sensu Protostomia) // non-traceable author statement /// 16998 // cell wall catabolism // inferred from electronic annotation	5576 // extracellular region // inferred from electronic annotation	IPR001916 // Glycoside hydrolase, family 22 // 1.3E-67
9204	150403_at	-1.66747	1.76825	-17.3887	1.09005e-17	1.79665e-15	30.3624	FBgn0039030	CG6660	CG6660	CG6660	42708	8415 // acyltransferase activity // inferred from electronic annotation /// 16740 // transferase activity // inferred from electronic annotation	6629 // lipid metabolism // inferred from electronic annotation /// 6631 // fatty acid metabolism // inferred from electronic annotation	16021 // integral to membrane // inferred from electronic annotation	IPR002076 // GNS1/SUR4 membrane protein // 4.3E-8 /// IPR002076 // GNS1/SUR4 membrane protein // 4.3E-8
8292	149491_at	-2.06663	0.894192	-17.3292	1.20221e-17	1.95849e-15	30.2645	FBgn0037577	CG7443	CG7443	CG7443	40992	---	---	---	---
9510	150709_at	-1.55278	1.95327	-17.2849	1.29328e-17	2.08263e-15	30.1916	FBgn0039483	CG14259	CG14259	CG14259	43261	---	---	---	IPR004272 // Odorant binding protein // 1.2E-56
11870	153069_at	-2.58654	4.34847	-17.1795	1.53998e-17	2.45172e-15	30.0171	FBgn0034394	CG15096	CG15096	CG15096	37170	5316 // high affinity inorganic phosphate:sodium symporter activity // inferred from sequence or structural similarity /// 5215 // transporter activity // inferred from electronic annotation /// 5316 // high affinity inorganic phosphate:sodium symporter activity // inferred from sequence similarity	5975 // carbohydrate metabolism // inferred from electronic annotation /// 6796 // phosphate metabolism // inferred from electronic annotation /// 6812 // cation transport // inferred from electronic annotation /// 6817 // phosphate transport // inferred from electronic annotation /// 6858 // extracellular transport // inferred from electronic annotation /// 8643 // carbohydrate transport // infe…	16020 // membrane // inferred from electronic annotation /// 16021 // integral to membrane // inferred from electronic annotation	---
11353	152552_at	-1.08092	3.31811	-17.1258	1.68352e-17	2.64769e-15	29.9281	FBgn0053970	---	CG33970	CG33970	43186	166 // nucleotide binding // inferred from electronic annotation /// 5215 // transporter activity // inferred from sequence or structural similarity /// 5524 // ATP binding // inferred from electronic annotation /// 42626 // ATPase activity, coupled to transmembrane movement of substances // inferred from sequence or structural similarity /// 16887 // ATPase activity // inferred from electronic a…	6810 // transport // inferred from sequence or structural similarity /// 6810 // transport // inferred from electronic annotation /// 6810 // transport // inferred from sequence similarity	16020 // membrane // inferred from electronic annotation /// 43190 // ATP-binding cassette (ABC) transporter complex // inferred from sequence or structural similarity /// 43190 // ATP-binding cassette (ABC) transporter complex // inferred from sequence similarity	---
11800	152999_at	-1.63474	1.87521	-17.0186	2.01324e-17	2.96917e-15	29.7493	FBgn0031305	CG4715	Iris	Iris	33290	---	9993 // oogenesis (sensu Insecta) // non-traceable author statement	---	---
11163	152362_at	-2.62974	4.13732	-16.9705	2.18194e-17	3.18427e-15	29.6689	FBgn0011559	CG7157	Acp36DE	Accessory gland peptide 36DE	35096	5179 // hormone activity // non-traceable author statement	7321 // sperm displacement // non-traceable author statement /// 42628 // mating plug formation // traceable author statement /// 45434 // negative regulation of female receptivity, post-mating // non-traceable author statement /// 46692 // sperm competition // traceable author statement /// 46693 // sperm storage // inferred from mutant phenotype /// 46693 // sperm storage // traceable author st…	5576 // extracellular region // non-traceable author statement /// 5576 // extracellular region // traceable author statement	---
11771	152970_at	-1.18794	2.56004	-16.9223	2.36592e-17	3.41716e-15	29.5879	FBgn0010548	CG11140	Aldh-III	Aldehyde dehydrogenase type III	45398	4028 // 3-chloroallyl aldehyde dehydrogenase activity // inferred from sequence or structural similarity /// 4030 // aldehyde dehydrogenase [NAD(P)+] activity // inferred from electronic annotation /// 16491 // oxidoreductase activity // inferred from electronic annotation /// 4028 // 3-chloroallyl aldehyde dehydrogenase activity // inferred from sequence similarity	6952 // defense response // inferred from electronic annotation /// 8152 // metabolism // inferred from electronic annotation /// 9636 // response to toxin // inferred from electronic annotation /// 6081 // aldehyde metabolism // inferred from electronic annotation	---	IPR002086 // Aldehyde dehydrogenase // 3.3E-32 /// IPR002086 // Aldehyde dehydrogenase // 8.4E-8 /// IPR002086 // Aldehyde dehydrogenase // 5.7E-49 /// IPR002086 // Aldehyde dehydrogenase // 1.3E-44 /// IPR002086 // Aldehyde dehydrogenase // 1.3E-44
4682	145881_at	-1.08091	0.129608	-16.8326	2.75177e-17	3.81797e-15	29.4368	FBgn0031791	CG9486	CG9486	CG9486	33874	8080 // N-acetyltransferase activity // inferred from electronic annotation	---	---	IPR000182 // GCN5-related N-acetyltransferase // 2.7E-8
8568	149767_at	-3.05066	3.91474	-16.8324	2.75243e-17	3.81797e-15	29.4366	---	CG10096 /// CG10097	---	---	---	---	---	---	---
11232	152431_at	-2.30989	3.66508	-16.6944	3.47704e-17	4.68397e-15	29.2028	FBgn0028480	CG17841	CG17841	CG17841	31965	5515 // protein binding // inferred from physical interaction	---	16021 // integral to membrane // inferred from electronic annotation	IPR010283 // Eukaryotic protein of unknown function DUF887 // 3.0E-5
221	141420_at	-1.32389	2.37584	-16.615	3.97987e-17	5.31028e-15	29.0676	FBgn0025620	CG13360	CG13360	CG13360	31025	16301 // kinase activity // inferred from electronic annotation /// 16740 // transferase activity // inferred from electronic annotation	---	---	IPR004119 // Protein of unknown function DUF227 // 4.8E-115
2140	143339_i_at	-2.7969	6.23047	-16.5533	4.42265e-17	5.80786e-15	28.9621	FBgn0003357	CG31362	Jon99Ciii	Jonah 99Ciii	43543	4252 // serine-type endopeptidase activity // inferred from sequence or structural similarity /// 4252 // serine-type endopeptidase activity // non-traceable author statement /// 4263 // chymotrypsin activity // non-traceable author statement /// 4295 // trypsin activity // inferred from electronic annotation /// 8236 // serine-type peptidase activity // non-traceable author statement /// 4252 //…	6508 // proteolysis // non-traceable author statement /// 7586 // digestion // non-traceable author statement /// 6508 // proteolysis // inferred from electronic annotation	---	IPR001254 // Peptidase S1, chymotrypsin // 1.1E-57
2626	143825_at	-2.30059	3.90379	-16.548	4.46246e-17	5.80786e-15	28.9531	FBgn0015584 /// FBgn0064259	CG8622	Acp53Ea /// DyakAcp53Ea	Accessory gland-specific peptide 53Ea /// Acp53Ea	36874	5179 // hormone activity // non-traceable author statement /// 5515 // protein binding // inferred from physical interaction	7321 // sperm displacement // non-traceable author statement /// 7582 // physiological process // non-traceable author statement /// 45297 // post-mating behavior // non-traceable author statement /// 46692 // sperm competition // traceable author statement /// 7610 // behavior // inferred from electronic annotation	5576 // extracellular region // non-traceable author statement	IPR009392 // Drosophila ACP53EA // 6.0E-106
4963	146162_at	-1.35183	1.96553	-16.5429	4.5017e-17	5.80786e-15	28.9443	FBgn0032253	CG5322	CG5322	CG5322	34436	4559 // alpha-mannosidase activity // inferred from sequence or structural similarity /// 16799 // hydrolase activity, hydrolyzing N-glycosyl compounds // inferred from electronic annotation /// 4559 // alpha-mannosidase activity // inferred from sequence similarity	5975 // carbohydrate metabolism // inferred from electronic annotation	5764 // lysosome // inferred from sequence or structural similarity /// 5764 // lysosome // inferred from sequence similarity	IPR000602 // Glycoside hydrolase, family 38 // 1.0E-126
1187	142386_at	-1.98721	2.17478	-16.4885	4.94178e-17	6.29403e-15	28.851	FBgn0034247	CG6484	CG6484	CG6484	36994	5351 // sugar porter activity // inferred from electronic annotation /// 5355 // glucose transporter activity // inferred from sequence or structural similarity /// 5215 // transporter activity // inferred from electronic annotation /// 5355 // glucose transporter activity // inferred from sequence similarity	5975 // carbohydrate metabolism // inferred from electronic annotation /// 8643 // carbohydrate transport // inferred from electronic annotation /// 6810 // transport // inferred from electronic annotation	16020 // membrane // inferred from electronic annotation /// 16021 // integral to membrane // inferred from electronic annotation	IPR005828 // General substrate transporter // 1.8E-106
4335	145534_at	-2.22088	1.69123	-16.387	5.88391e-17	7.35213e-15	28.6763	FBgn0043364	CG4427	cbt	cabut	33224	3676 // nucleic acid binding // inferred from electronic annotation /// 8270 // zinc ion binding // inferred from electronic annotation /// 16563 // transcriptional activator activity // inferred from sequence or structural similarity /// 46872 // metal ion binding // inferred from electronic annotation /// 16563 // transcriptional activator activity // inferred from sequence similarity	1736 // establishment of planar polarity // non-traceable author statement /// 6357 // regulation of transcription from RNA polymerase II promoter // inferred from electronic annotation /// 7254 // JNK cascade // non-traceable author statement /// 7390 // germ-band shortening // non-traceable author statement /// 7391 // dorsal closure // non-traceable author statement /// 7423 // sensory organ d…	5634 // nucleus // inferred from electronic annotation	IPR007087 // Zn-finger, C2H2 type // 1.7E-6 /// IPR007087 // Zn-finger, C2H2 type // 1.9E-7 /// IPR007087 // Zn-finger, C2H2 type // 3.2E-5 /// IPR007087 // Zn-finger, C2H2 type // 1.7E-6 /// IPR007087 // Zn-finger, C2H2 type // 1.9E-7 /// IPR007087 // Zn-finger, C2H2 type // 3.2E-5
8106	149305_at	-0.80679	2.58423	-16.3434	6.34324e-17	7.77186e-15	28.601	FBgn0037290	CG1124	CG1124	CG1124	40613	5515 // protein binding // inferred from physical interaction	---	---	IPR004272 // Odorant binding protein // 4.5E-48
10582	151781_at	-3.46719	3.71164	-16.2632	7.2885e-17	8.80275e-15	28.4619	FBgn0039342	CG5107	CG5107	CG5107	43084	5515 // protein binding // inferred from physical interaction	---	---	---
4904	146103_at	-2.25841	2.63932	-16.2557	7.38418e-17	8.84208e-15	28.4488	FBgn0032144	CG17633	CG17633	CG17633	34297	4182 // carboxypeptidase A activity // inferred from sequence or structural similarity /// 4180 // carboxypeptidase activity // inferred from electronic annotation /// 4182 // carboxypeptidase A activity // inferred from electronic annotation /// 4182 // carboxypeptidase A activity // inferred from sequence similarity	6508 // proteolysis // inferred from electronic annotation	---	IPR000834 // Peptidase M14, carboxypeptidase A // 3.8E-83
8104	149303_at	-1.59991	2.65474	-16.2203	7.85151e-17	9.24367e-15	28.3874	FBgn0037288	CG14661	CG14661	CG14661	40611	---	---	---	IPR004272 // Odorant binding protein // 1.1E-48
1952	143151_at	-2.00343	4.89511	-16.1366	9.08369e-17	1.05176e-14	28.2413	FBgn0000592	CG6917	Est-6	Esterase 6	39392	4091 // carboxylesterase activity // non-traceable author statement /// 4091 // carboxylesterase activity // traceable author statement /// 5102 // receptor binding // inferred from electronic annotation /// 3824 // catalytic activity // inferred from electronic annotation /// 4091 // carboxylesterase activity // inferred from electronic annotation /// 4759 // serine esterase activity // inferred…	7165 // signal transduction // inferred from electronic annotation /// 7267 // cell-cell signaling // inferred from electronic annotation /// 7618 // mating // traceable author statement /// 7619 // courtship behavior // inferred from mutant phenotype /// 19953 // sexual reproduction // non-traceable author statement /// 30728 // ovulation // traceable author statement /// 42811 // pheromone bios…	---	IPR002018 // Carboxylesterase, type B // 1.0E-126 /// IPR002018 // Carboxylesterase, type B // 1.0E-126
11579	152778_at	-2.18341	2.57086	-16.1228	9.30575e-17	1.06864e-14	28.2171	FBgn0039872	CG2196	CG2196	CG2196	43742	8324 // cation transporter activity // inferred from electronic annotation /// 8507 // sodium:iodide symporter activity // inferred from sequence or structural similarity /// 5215 // transporter activity // inferred from electronic annotation /// 8507 // sodium:iodide symporter activity // inferred from sequence similarity	6732 // coenzyme metabolism // inferred from electronic annotation /// 6812 // cation transport // inferred from electronic annotation /// 6858 // extracellular transport // inferred from electronic annotation /// 51189 // prosthetic group metabolism // inferred from electronic annotation /// 6810 // transport // inferred from electronic annotation	16020 // membrane // inferred from electronic annotation	---
2691	143890_at	-1.37909	1.60921	-16.1096	9.52328e-17	1.07598e-14	28.194	FBgn0017448	CG2187	CG2187	CG2187	43743	8324 // cation transporter activity // inferred from electronic annotation /// 8507 // sodium:iodide symporter activity // inferred from sequence or structural similarity /// 5215 // transporter activity // inferred from electronic annotation /// 8507 // sodium:iodide symporter activity // inferred from sequence similarity	6732 // coenzyme metabolism // inferred from electronic annotation /// 6812 // cation transport // inferred from electronic annotation /// 6858 // extracellular transport // inferred from electronic annotation /// 51189 // prosthetic group metabolism // inferred from electronic annotation /// 6810 // transport // inferred from electronic annotation /// 6811 // ion transport // inferred from elect…	16020 // membrane // inferred from electronic annotation /// 16021 // integral to membrane // inferred from electronic annotation	IPR001734 // Na+/solute symporter // 1.6E-11 /// IPR001734 // Na+/solute symporter // 8.9E-6
9377	150576_at	-1.27869	2.6363	-16.0482	1.06031e-16	1.17897e-14	28.0863	FBgn0039312	CG10514	CG10514	CG10514	43052	5515 // protein binding // inferred from physical interaction /// 16301 // kinase activity // inferred from electronic annotation /// 16740 // transferase activity // inferred from electronic annotation	---	---	IPR004119 // Protein of unknown function DUF227 // 2.2E-121
12811	154010_at	-0.967219	1.39646	-16.0076	1.13867e-16	1.25612e-14	28.0149	FBgn0027528	CG9634	CG9634	CG9634	32660	4222 // metalloendopeptidase activity // inferred from sequence or structural similarity /// 16511 // endothelin-converting enzyme activity // inferred from sequence or structural similarity /// 4245 // neprilysin activity // inferred from electronic annotation /// 8237 // metallopeptidase activity // inferred from electronic annotation /// 4222 // metalloendopeptidase activity // inferred from s…	6508 // proteolysis // inferred from electronic annotation /// 7165 // signal transduction // inferred from electronic annotation	16020 // membrane // inferred from electronic annotation	IPR008753 // Peptidase M13 // 2.0E-6
8992	150191_at	-1.50229	1.62933	-15.9698	1.21677e-16	1.33179e-14	27.9484	FBgn0038700	CG3734	CG3734	CG3734	42318	8236 // serine-type peptidase activity // inferred from sequence or structural similarity /// 3824 // catalytic activity // inferred from electronic annotation /// 8233 // peptidase activity // inferred from electronic annotation /// 8236 // serine-type peptidase activity // inferred from electronic annotation /// 8236 // serine-type peptidase activity // inferred from sequence similarity	6508 // proteolysis // inferred from electronic annotation	5764 // lysosome // inferred from electronic annotation	IPR008758 // Peptidase S28 // 1.0E-126
3065	144264_at	-2.1885	2.55311	-15.9481	1.26418e-16	1.37296e-14	27.9101	FBgn0028853	CG15263	CG15263	CG15263	34898	---	---	---	---
995	142194_at	-1.08058	2.24681	-15.7522	1.78815e-16	1.89788e-14	27.5624	FBgn0031813	CG9527	CG9527	CG9527	33898	16402 // pristanoyl-CoA oxidase activity // non-traceable author statement /// 3995 // acyl-CoA dehydrogenase activity // inferred from electronic annotation /// 3997 // acyl-CoA oxidase activity // inferred from electronic annotation /// 16491 // oxidoreductase activity // inferred from electronic annotation /// 50660 // FAD binding // inferred from electronic annotation	6118 // electron transport // inferred from electronic annotation /// 6635 // fatty acid beta-oxidation // inferred from electronic annotation /// 6631 // fatty acid metabolism // inferred from electronic annotation	5777 // peroxisome // inferred from electronic annotation	IPR002655 // Acyl-CoA oxidase // 5.0E-24 /// IPR006090 // Acyl-CoA dehydrogenase, C-terminal // 5.8E-5
5329	146528_at	-1.59752	1.56542	-15.734	1.84716e-16	1.94577e-14	27.5299	FBgn0032839	CG10659	CG10659	CG10659	35285	---	---	---	---
7223	148422_at	-2.64263	2.82563	-15.7126	1.91884e-16	2.00619e-14	27.4917	FBgn0035926	CG5804	CG5804	CG5804	39005	62 // acyl-CoA binding // inferred from sequence or structural similarity /// 4857 // enzyme inhibitor activity // inferred from sequence or structural similarity /// 5386 // carrier activity // inferred from electronic annotation /// 50809 // diazepam binding // inferred from sequence or structural similarity /// 62 // acyl-CoA binding // inferred from electronic annotation /// 62 // acyl-CoA bi…	6869 // lipid transport // inferred from electronic annotation /// 42049 // cell acyl-CoA homeostasis // inferred from sequence or structural similarity /// 42049 // cell acyl-CoA homeostasis // inferred from sequence similarity	---	IPR000582 // Acyl-coA-binding protein, ACBP // 2.7E-15
11385	152584_at	-0.995121	3.4045	-15.6803	2.03257e-16	2.09385e-14	27.434	FBgn0039697	CG7834	CG7834	CG7834	43515	9055 // electron carrier activity // inferred from sequence or structural similarity /// 16491 // oxidoreductase activity // inferred from electronic annotation /// 9055 // electron carrier activity // inferred from sequence similarity	6118 // electron transport // inferred from electronic annotation /// 6119 // oxidative phosphorylation // inferred from sequence or structural similarity /// 6119 // oxidative phosphorylation // inferred from sequence similarity	17133 // electron transfer flavoprotein complex (sensu Eukaryota) // inferred from sequence or structural similarity /// 17133 // electron transfer flavoprotein complex (sensu Eukaryota) // inferred from sequence similarity	IPR000049 // Electron transfer flavoprotein beta-subunit // 4.8E-108
10513	151712_at	-0.930755	1.11648	-15.6495	2.14743e-16	2.19603e-14	27.3788	FBgn0031097	CG17052	CG17052	CG17052	33022	8061 // chitin binding // inferred from electronic annotation /// 16490 // structural constituent of peritrophic membrane (sensu Insecta) // inferred from sequence or structural similarity /// 16490 // structural constituent of peritrophic membrane (sensu Insecta) // inferred from sequence similarity	6030 // chitin metabolism // inferred from electronic annotation	5576 // extracellular region // inferred from electronic annotation	IPR002557 // Chitin binding Peritrophin-A // 7.6E-17 /// IPR002557 // Chitin binding Peritrophin-A // 4.0E-17 /// IPR002557 // Chitin binding Peritrophin-A // 2.7E-13
8396	149595_at	-1.25406	2.71067	-15.6138	2.28929e-16	2.32413e-14	27.3147	FBgn0037765	CG9458	CG9458	CG9458	41214	8415 // acyltransferase activity // inferred from electronic annotation /// 16740 // transferase activity // inferred from electronic annotation /// 5515 // protein binding // inferred from physical interaction	6629 // lipid metabolism // inferred from electronic annotation /// 6631 // fatty acid metabolism // inferred from electronic annotation	16021 // integral to membrane // inferred from electronic annotation	---
11445	152644_at	-1.40762	1.57031	-15.5934	2.37465e-16	2.38632e-14	27.2779	FBgn0038398	CG4979	sxe2	sex-specific enzyme 2	41954	17063 // phosphatidylserine-specific phospholipase A1 activity // inferred from sequence or structural similarity /// 3824 // catalytic activity // inferred from electronic annotation /// 17063 // phosphatidylserine-specific phospholipase A1 activity // inferred from sequence similarity	6629 // lipid metabolism // inferred from electronic annotation	---	IPR000734 // Lipase // 4.6E-21
12802	154001_at	-1.68202	1.62831	-15.591	2.38462e-16	2.38632e-14	27.2737	FBgn0030607	CG5560	CG5560	CG5560	32436	---	6629 // lipid metabolism // inferred from electronic annotation	---	IPR002641 // Patatin // 2.4E-41
13951	155150_at	-1.10381	3.54068	-15.5551	2.54367e-16	2.52744e-14	27.209	---	CG6782 /// CG6783	---	---	---	5371 // tricarboxylate carrier activity // inferred from sequence or structural similarity /// 5386 // carrier activity // inferred from sequence or structural similarity /// 5215 // transporter activity // inferred from electronic annotation /// 5504 // fatty acid binding // inferred from sequence or structural similarity /// 5488 // binding // inferred from electronic annotation /// 8289 // lip…	6810 // transport // inferred from electronic annotation	5740 // mitochondrial envelope // inferred from sequence or structural similarity /// 5743 // mitochondrial inner membrane // inferred from electronic annotation /// 16020 // membrane // inferred from electronic annotation /// 16021 // integral to membrane // inferred from electronic annotation	---
1215	142414_at	-1.60663	3.6928	-15.5496	2.56879e-16	2.53442e-14	27.1991	FBgn0039801	CG11315	CG11315	CG11315	43649	---	---	---	IPR003172 // E1 protein and Def2/Der2 allergen // 3.5E-45 /// IPR003172 // E1 protein and Def2/Der2 allergen // 4.1E-22 /// IPR003172 // E1 protein and Def2/Der2 allergen // 1.1E-5
5074	146273_at	-1.30363	1.8801	-15.5152	2.73276e-16	2.65875e-14	27.137	FBgn0032413	CG16997	CG16997	CG16997	34638	4252 // serine-type endopeptidase activity // inferred from sequence or structural similarity /// 4263 // chymotrypsin activity // non-traceable author statement /// 4295 // trypsin activity // inferred from electronic annotation /// 4252 // serine-type endopeptidase activity // inferred from electronic annotation /// 4252 // serine-type endopeptidase activity // inferred from sequence similarity	6508 // proteolysis // non-traceable author statement /// 6508 // proteolysis // inferred from electronic annotation	---	IPR001254 // Peptidase S1, chymotrypsin // 1.2E-53
5669	146868_at	-1.51112	3.7506	-15.4926	2.84592e-16	2.74975e-14	27.0963	FBgn0028955	CG8788	CG8788	CG8788	35932	5515 // protein binding // inferred from physical interaction	---	---	---
3032	144231_at	-1.20014	1.55918	-15.4316	3.17735e-16	3.04895e-14	26.9858	FBgn0028532	CG7968	CG7968	CG7968	34802	---	---	---	---
8800	149999_at	-1.17623	0.572875	-15.4155	3.27144e-16	3.11788e-14	26.9565	FBgn0038404	CG8925	CG8925	CG8925	41963	8324 // cation transporter activity // inferred from electronic annotation /// 15226 // carnitine transporter activity // inferred from sequence or structural similarity /// 5215 // transporter activity // inferred from electronic annotation /// 15226 // carnitine transporter activity // inferred from sequence similarity	6812 // cation transport // inferred from electronic annotation /// 6858 // extracellular transport // inferred from electronic annotation /// 6810 // transport // inferred from electronic annotation	16020 // membrane // inferred from electronic annotation /// 16021 // integral to membrane // inferred from electronic annotation	IPR005828 // General substrate transporter // 2.7E-18 /// IPR005828 // General substrate transporter // 2.7E-18
11484	152683_at	-0.742097	1.41751	-15.3712	3.54448e-16	3.33276e-14	26.876	FBgn0034883	CG17664	CG17664	CG17664	37737	5386 // carrier activity // inferred from electronic annotation /// 5488 // binding // inferred from electronic annotation /// 15250 // water channel activity // inferred from sequence or structural similarity /// 5215 // transporter activity // inferred from electronic annotation /// 15250 // water channel activity // inferred from sequence similarity	6810 // transport // inferred from electronic annotation /// 19725 // cell homeostasis // inferred from electronic annotation	16020 // membrane // inferred from electronic annotation /// 16021 // integral to membrane // inferred from electronic annotation	IPR000425 // Major intrinsic protein // 3.8E-51
7133	148332_at	-1.44765	1.67366	-15.3101	3.95995e-16	3.69859e-14	26.7648	FBgn0035779	CG8562	CG8562	CG8562	38828	4181 // metallocarboxypeptidase activity // inferred from sequence or structural similarity /// 4182 // carboxypeptidase A activity // inferred from electronic annotation /// 4181 // metallocarboxypeptidase activity // inferred from sequence similarity	6508 // proteolysis // inferred from electronic annotation	---	IPR000834 // Peptidase M14, carboxypeptidase A // 1.1E-66
8411	149610_at	-1.63575	1.20336	-15.3033	4.00949e-16	3.70027e-14	26.7523	FBgn0037782	CG12813	CG12813	CG12813	41232	---	---	---	IPR003172 // E1 protein and Def2/Der2 allergen // 4.6E-40
12040	153239_at	-0.85018	3.6526	-15.3026	4.01457e-16	3.70027e-14	26.751	FBgn0033382	CG8058	CG8058	CG8058	35930	3824 // catalytic activity // inferred from electronic annotation	---	---	---
1214	142413_at	-2.38588	3.58022	-15.2591	4.34554e-16	3.97915e-14	26.6715	FBgn0039800	CG11314	CG11314	CG11314	43648	---	7498 // mesoderm development // inferred from expression pattern	---	IPR003172 // E1 protein and Def2/Der2 allergen // 4.2E-46 /// IPR003172 // E1 protein and Def2/Der2 allergen // 4.2E-46
2500	143699_at	-1.07886	0.717104	-15.2409	4.49239e-16	4.07719e-14	26.6381	FBgn0011834	CG2071	Ser6	Serine protease 6	33073	4252 // serine-type endopeptidase activity // inferred from sequence or structural similarity /// 4252 // serine-type endopeptidase activity // non-traceable author statement /// 4263 // chymotrypsin activity // inferred from electronic annotation /// 4295 // trypsin activity // inferred from electronic annotation /// 8236 // serine-type peptidase activity // non-traceable author statement /// 42…	6508 // proteolysis // non-traceable author statement /// 6508 // proteolysis // inferred from electronic annotation	---	IPR001254 // Peptidase S1, chymotrypsin // 9.9E-67
6129	147328_at	-2.08438	3.74396	-15.2322	4.56412e-16	4.07719e-14	26.6222	FBgn0034153	CG15616	Acp53C14b	Acp53C14b	36873	---	---	---	---
9689	150888_at	-1.22509	0.900561	-15.2373	4.52197e-16	4.07719e-14	26.6315	FBgn0039769	CG15534	CG15534	CG15534	43613	4767 // sphingomyelin phosphodiesterase activity // inferred from sequence or structural similarity /// 4767 // sphingomyelin phosphodiesterase activity // inferred from electronic annotation /// 16787 // hydrolase activity // inferred from electronic annotation /// 4767 // sphingomyelin phosphodiesterase activity // inferred from sequence similarity	6684 // sphingomyelin metabolism // inferred from sequence or structural similarity /// 6685 // sphingomyelin catabolism // inferred from electronic annotation /// 6684 // sphingomyelin metabolism // inferred from sequence similarity	---	IPR004843 // Metallo-phosphoesterase // 3.9E-16
10627	151826_at	-1.52009	3.79652	-15.2316	4.56901e-16	4.07719e-14	26.6212	FBgn0037913	CG6783	CG6783	CG6783	3772232	5215 // transporter activity // inferred from electronic annotation /// 5504 // fatty acid binding // inferred from sequence or structural similarity /// 5488 // binding // inferred from electronic annotation /// 8289 // lipid binding // inferred from electronic annotation /// 5504 // fatty acid binding // inferred from sequence similarity	6810 // transport // inferred from electronic annotation	5743 // mitochondrial inner membrane // inferred from electronic annotation /// 16020 // membrane // inferred from electronic annotation /// 16021 // integral to membrane // inferred from electronic annotation	IPR000566 // Lipocalin-related protein and Bos/Can/Equ allergen // 1.6E-36
5953	147152_at	-1.5069	1.21922	-15.1804	5.0171e-16	4.42072e-14	26.5272	FBgn0019928	CG4812	Ser8	Ser8	36489	4263 // chymotrypsin activity // inferred from electronic annotation /// 4295 // trypsin activity // inferred from sequence or structural similarity /// 4295 // trypsin activity // non-traceable author statement /// 8236 // serine-type peptidase activity // inferred from sequence or structural similarity /// 4252 // serine-type endopeptidase activity // inferred from electronic annotation /// 823…	6508 // proteolysis // non-traceable author statement /// 6508 // proteolysis // inferred from electronic annotation	---	IPR001254 // Peptidase S1, chymotrypsin // 2.4E-86
11567	152766_at	-1.39079	1.32725	-15.1666	5.14554e-16	4.47494e-14	26.5018	FBgn0002563	CG4178	Lsp1	Larval serum protein 1	33274	5344 // oxygen transporter activity // inferred from electronic annotation /// 45735 // nutrient reservoir activity // non-traceable author statement /// 45735 // nutrient reservoir activity // inferred from electronic annotation	6810 // transport // inferred from electronic annotation	5576 // extracellular region // non-traceable author statement /// 5616 // larval serum protein complex // inferred from direct assay	IPR000896 // Arthropod hemocyanin/insect LSP // 8.2E-98 /// IPR005204 // Hemocyanin, N-terminal // 8.4E-38 /// IPR005203 // Hemocyanin, C-terminal // 1.8E-109
11839	153038_at	-0.988503	1.20673	-15.17	5.11359e-16	4.47494e-14	26.5081	FBgn0003390	CG3135	shf	shifted	31617	4713 // protein-tyrosine kinase activity // inferred from electronic annotation /// 4872 // receptor activity // inferred from electronic annotation /// 5102 // receptor binding // inferred from electronic annotation /// 5515 // protein binding // inferred from physical interaction	7154 // cell communication // inferred from electronic annotation /// 7165 // signal transduction // inferred from electronic annotation /// 7166 // cell surface receptor linked signal transduction // inferred from electronic annotation /// 7224 // smoothened signaling pathway // inferred from genetic interaction /// 7224 // smoothened signaling pathway // inferred from mutant phenotype /// 7267 …	5576 // extracellular region // inferred from direct assay /// 5578 // extracellular matrix (sensu Metazoa) // inferred from direct assay /// 5578 // extracellular matrix (sensu Metazoa) // inferred from electronic annotation	IPR006209 // EGF-like domain // 3.8E-4 /// IPR006209 // EGF-like domain // 7.1E-6 /// IPR003306 // WIF domain // 2.8E-85
6321	147520_at	-1.88235	4.51921	-15.1443	5.36079e-16	4.60765e-14	26.4607	FBgn0034474	CG13873	Obp56g	Odorant-binding protein 56g	37270	5549 // odorant binding // inferred from sequence or structural similarity /// 5549 // odorant binding // non-traceable author statement /// 5549 // odorant binding // inferred from electronic annotation /// 5549 // odorant binding // inferred from sequence similarity	6810 // transport // inferred from electronic annotation /// 7606 // sensory perception of chemical stimulus // inferred from sequence or structural similarity /// 7606 // sensory perception of chemical stimulus // inferred from sequence similarity	---	IPR006170 // Pheromone/general odorant binding protein, PBP/GOBP // 3.9E-25 /// IPR006170 // Pheromone/general odorant binding protein, PBP/GOBP // 1.6E-23
227	141426_at	-1.77187	2.25709	-15.1259	5.54481e-16	4.70974e-14	26.4268	FBgn0036996	CG5932	CG5932	CG5932	40267	4806 // triacylglycerol lipase activity // inferred from sequence or structural similarity /// 3824 // catalytic activity // inferred from electronic annotation /// 16789 // carboxylic ester hydrolase activity // inferred from electronic annotation /// 4806 // triacylglycerol lipase activity // inferred from sequence similarity	6629 // lipid metabolism // inferred from electronic annotation /// 16042 // lipid catabolism // inferred from electronic annotation	---	IPR000073 // Alpha/beta hydrolase fold // 2.2E-14 /// IPR006693 // Ab-hydrolase associated lipase region // 1.1E-21
2348	143547_at	-1.44254	3.90663	-15.1224	5.58042e-16	4.70974e-14	26.4204	FBgn0005585	CG9429	Crc	Calreticulin	41166	5509 // calcium ion binding // inferred from sequence or structural similarity /// 5509 // calcium ion binding // non-traceable author statement /// 51082 // unfolded protein binding // inferred from electronic annotation /// 5509 // calcium ion binding // inferred from electronic annotation /// 5529 // sugar binding // inferred from electronic annotation /// 8270 // zinc ion binding // inferred …	6457 // protein folding // inferred from electronic annotation /// 6886 // intracellular protein transport // inferred from electronic annotation /// 6887 // exocytosis // inferred from electronic annotation /// 7417 // central nervous system development // inferred from mutant phenotype /// 7422 // peripheral nervous system development // traceable author statement /// 42048 // olfactory behavio…	5788 // endoplasmic reticulum lumen // inferred from sequence or structural similarity /// 5788 // endoplasmic reticulum lumen // non-traceable author statement /// 16020 // membrane // inferred from electronic annotation /// 16021 // integral to membrane // inferred from electronic annotation /// 5783 // endoplasmic reticulum // inferred from electronic annotation /// 5788 // endoplasmic reticul…	IPR001580 // Calreticulin/calnexin // 1.0E-126
8672	149871_at	-1.0273	2.79182	-15.105	5.76196e-16	4.83383e-14	26.3882	FBgn0038198	CG3153	CG3153	CG3153	41710	5102 // receptor binding // inferred from electronic annotation	---	---	IPR003172 // E1 protein and Def2/Der2 allergen // 3.7E-43
10927	152126_at	-1.72965	5.20321	-14.9156	8.17348e-16	6.69651e-14	26.0371	FBgn0027571	CG3523	CG3523	CG3523	33524	4024 // alcohol dehydrogenase activity, zinc-dependent // inferred from electronic annotation /// 4312 // fatty-acid synthase activity // inferred from sequence or structural similarity /// 8270 // zinc ion binding // inferred from electronic annotation /// 16788 // hydrolase activity, acting on ester bonds // inferred from electronic annotation /// 48037 // cofactor binding // inferred from elec…	6633 // fatty acid biosynthesis // inferred from electronic annotation /// 8152 // metabolism // inferred from electronic annotation /// 9058 // biosynthesis // inferred from electronic annotation	---	IPR002085 // Zinc-containing alcohol dehydrogenase superfamily // 4.4E-53 /// IPR000794 // Beta-ketoacyl synthase // 1.9E-66 /// IPR001227 // Acyl transferase domain // 7.6E-87 /// IPR001031 // Thioesterase // 3.7E-16 /// IPR000794 // Beta-ketoacyl synthase // 2.0E-82
11449	152648_at	-1.50635	3.28686	-14.8947	8.49624e-16	6.92048e-14	25.9982	FBgn0035090	CG2736	CG2736	CG2736	37998	5044 // scavenger receptor activity // non-traceable author statement	6952 // defense response // non-traceable author statement /// 7155 // cell adhesion // inferred from electronic annotation	5887 // integral to plasma membrane // non-traceable author statement /// 16020 // membrane // inferred from electronic annotation	IPR002159 // CD36 antigen // 3.2E-17
6904	148103_at	-3.426	3.59024	-14.8472	9.28182e-16	7.51666e-14	25.9093	FBgn0035434	CG10812	dro5	drosomycin-5	38409	8200 // ion channel inhibitor activity // inferred from electronic annotation	6952 // defense response // non-traceable author statement /// 9405 // pathogenesis // inferred from electronic annotation /// 6952 // defense response // inferred from electronic annotation	5576 // extracellular region // inferred from electronic annotation	IPR008176 // Gamma thionin // 5.4E-18
2073	143272_at	-1.48494	3.24277	-14.797	1.01924e-15	8.2066e-14	25.8153	FBgn0002855	CG8982	Acp26Aa	Accessory gland-specific peptide 26Aa	33817	5179 // hormone activity // non-traceable author statement	7321 // sperm displacement // non-traceable author statement /// 7618 // mating // inferred from electronic annotation /// 18991 // oviposition // non-traceable author statement /// 18991 // oviposition // traceable author statement /// 30728 // ovulation // inferred from mutant phenotype /// 30728 // ovulation // traceable author statement /// 45297 // post-mating behavior // non-traceable autho…	5576 // extracellular region // non-traceable author statement	IPR004315 // Male Drosophila accessory gland secretory protein // 1.0E-126
12849	154048_at	-0.926882	2.19353	-14.7867	1.03899e-15	8.27056e-14	25.796	FBgn0026576	CG5991	CG5991	CG5991	42849	4609 // phosphatidylserine decarboxylase activity // inferred from sequence or structural similarity /// 4609 // phosphatidylserine decarboxylase activity // inferred from electronic annotation /// 4609 // phosphatidylserine decarboxylase activity // inferred from sequence similarity	6644 // phospholipid metabolism // inferred from electronic annotation /// 8654 // phospholipid biosynthesis // inferred from electronic annotation	---	IPR003817 // Phosphatidylserine decarboxylase-related // 5.5E-51
10757	151956_at	-1.02257	1.2036	-14.7772	1.0575e-15	8.37038e-14	25.7782	FBgn0033423	CG1809	CG1809	CG1809	35981	4035 // alkaline phosphatase activity // inferred from sequence or structural similarity /// 19204 // nucleotide phosphatase activity // inferred from electronic annotation /// 287 // magnesium ion binding // inferred from electronic annotation /// 8270 // zinc ion binding // inferred from electronic annotation /// 16787 // hydrolase activity // inferred from electronic annotation /// 4035 // alk…	1501 // skeletal development // inferred from electronic annotation /// 7498 // mesoderm development // inferred from electronic annotation /// 8152 // metabolism // inferred from electronic annotation	---	IPR001952 // Alkaline phosphatase // 8.2E-96
9	141208_at	-2.22632	4.49353	-14.7491	1.11456e-15	8.77244e-14	25.7254	FBgn0015623	CG11567	Cpr	Cytochrome P450 reductase	33883	3958 // NADPH-hemoprotein reductase activity // inferred from sequence or structural similarity /// 3958 // NADPH-hemoprotein reductase activity // non-traceable author statement /// 10181 // FMN binding // inferred from electronic annotation /// 3958 // NADPH-hemoprotein reductase activity // inferred from electronic annotation /// 16491 // oxidoreductase activity // inferred from electronic ann…	6118 // electron transport // non-traceable author statement /// 6118 // electron transport // inferred from electronic annotation	5783 // endoplasmic reticulum // non-traceable author statement /// 5783 // endoplasmic reticulum // inferred from electronic annotation /// 16020 // membrane // inferred from electronic annotation	IPR008254 // Flavodoxin/nitric oxide synthase // 5.8E-43 /// IPR001433 // Oxidoreductase FAD/NAD(P)-binding // 1.2E-40 /// IPR003097 // FAD-binding // 1.0E-126 /// IPR008254 // Flavodoxin/nitric oxide synthase // 9.9E-18 /// IPR001433 // Oxidoreductase FAD/NAD(P)-binding // 1.2E-40 /// IPR003097 // FAD-binding // 1.0E-126
11734	152933_at	-1.71133	2.84731	-14.7299	1.1554e-15	9.04311e-14	25.6893	FBgn0037090	CG7529	CG7529	CG7529	40381	4091 // carboxylesterase activity // inferred from sequence or structural similarity /// 3824 // catalytic activity // inferred from electronic annotation /// 4759 // serine esterase activity // inferred from electronic annotation /// 4091 // carboxylesterase activity // inferred from sequence similarity	---	---	IPR002018 // Carboxylesterase, type B // 1.0E-126
6713	147912_at	-1.45352	2.3151	-14.6423	1.36197e-15	1.03923e-13	25.5239	FBgn0035112	CG13877	CG13877	CG13877	38036	---	---	---	---
10692	151891_at	-1.18789	0.179018	-14.6421	1.36247e-15	1.03923e-13	25.5236	FBgn0024997	CG2681	CG2681	CG2681	31258	4842 // ubiquitin-protein ligase activity // inferred from electronic annotation /// 8270 // zinc ion binding // inferred from electronic annotation	6511 // ubiquitin-dependent protein catabolism // inferred from electronic annotation /// 7275 // development // inferred from electronic annotation /// 16567 // protein ubiquitination // inferred from electronic annotation	151 // ubiquitin ligase complex // inferred from electronic annotation /// 5634 // nucleus // inferred from electronic annotation	IPR004162 // Seven in absentia protein family // 6.9E-123
11765	152964_at	-0.933563	2.04103	-14.6467	1.35074e-15	1.03923e-13	25.5323	FBgn0033915	CG8485	CG8485	CG8485	36579	4674 // protein serine/threonine kinase activity // non-traceable author statement /// 5524 // ATP binding // inferred from electronic annotation /// 16909 // SAP kinase activity // inferred from sequence or structural similarity /// 166 // nucleotide binding // inferred from electronic annotation /// 4672 // protein kinase activity // inferred from electronic annotation /// 4674 // protein serin…	6468 // protein amino acid phosphorylation // non-traceable author statement /// 6468 // protein amino acid phosphorylation // inferred from electronic annotation	---	IPR000719 // Protein kinase // 2.4E-88
12832	154031_at	-1.67434	3.40612	-14.6411	1.36488e-15	1.03923e-13	25.5218	FBgn0013763	CG5210	Chit	Chitinase-like	36868	4568 // chitinase activity // inferred from sequence or structural similarity /// 4568 // chitinase activity // non-traceable author statement /// 8083 // growth factor activity // inferred from electronic annotation /// 16799 // hydrolase activity, hydrolyzing N-glycosyl compounds // inferred from electronic annotation /// 4553 // hydrolase activity, hydrolyzing O-glycosyl compounds // inferred …	6036 // cuticle chitin catabolism // inferred from sequence or structural similarity /// 6036 // cuticle chitin catabolism // non-traceable author statement /// 7165 // signal transduction // inferred from electronic annotation /// 7267 // cell-cell signaling // inferred from electronic annotation /// 5975 // carbohydrate metabolism // inferred from electronic annotation /// 6032 // chitin catabo…	5576 // extracellular region // inferred from direct assay	IPR001223 // Glycoside hydrolase, family 18 // 2.7E-101
9685	150884_at	-2.2912	2.68926	-14.6323	1.38789e-15	1.05104e-13	25.505	FBgn0039761	CG18404	CG18404	CG18404	43603	5515 // protein binding // inferred from physical interaction	---	---	---
5124	146323_at	-2.01941	4.45456	-14.6138	1.437e-15	1.0766e-13	25.47	FBgn0032494	CG5945	CG5945	CG5945	34729	5515 // protein binding // inferred from physical interaction	---	---	IPR004272 // Odorant binding protein // 1.9E-47
1752	142951_at	-2.85736	2.99316	-14.579	1.53433e-15	1.13735e-13	25.4042	FBgn0028534	CG7916	CG7916	CG7916	34800	5515 // protein binding // inferred from physical interaction	---	---	---
10774	151973_at	-1.25042	3.45387	-14.5669	1.56991e-15	1.15154e-13	25.3811	FBgn0042138	CG18815	CG18815	CG18815	59176	4620 // phospholipase activity // inferred from electronic annotation /// 16298 // lipase activity // inferred from electronic annotation /// 16787 // hydrolase activity // inferred from electronic annotation /// 16788 // hydrolase activity, acting on ester bonds // inferred from electronic annotation /// 3824 // catalytic activity // inferred from electronic annotation	6629 // lipid metabolism // inferred from electronic annotation /// 8152 // metabolism // inferred from electronic annotation /// 6631 // fatty acid metabolism // inferred from electronic annotation	---	IPR003140 // Phospholipase/Carboxylesterase // 8.9E-91
3366	144565_at	-1.25245	2.32275	-14.4999	1.782e-15	1.29356e-13	25.2537	FBgn0029828	CG6067	CG6067	CG6067	31529	4295 // trypsin activity // inferred from electronic annotation /// 4252 // serine-type endopeptidase activity // inferred from electronic annotation /// 8233 // peptidase activity // inferred from electronic annotation /// 16787 // hydrolase activity // inferred from electronic annotation	6508 // proteolysis // inferred from electronic annotation	---	---
4877	146076_at	-1.08582	3.18758	-14.477	1.86126e-15	1.34414e-13	25.2099	FBgn0040097	CG17011	lectin-30A	lectin-30A	53541	5534 // galactose binding // inferred from sequence or structural similarity /// 5534 // galactose binding // inferred from sequence similarity	7283 // spermatogenesis // inferred from electronic annotation	---	IPR001304 // C-type lectin // 2.0E-7
10784	151983_at	-1.00952	4.05155	-14.4635	1.9093e-15	1.37176e-13	25.1843	FBgn0027590	CG16936	CG16936	CG16936	37960	4364 // glutathione transferase activity // inferred from sequence or structural similarity /// 16740 // transferase activity // inferred from electronic annotation /// 4364 // glutathione transferase activity // inferred from sequence similarity	6952 // defense response // inferred from electronic annotation /// 9636 // response to toxin // inferred from electronic annotation	---	IPR004046 // Glutathione S-transferase, C-terminal // 4.5E-11 /// IPR004045 // Glutathione S-transferase, N-terminal // 1.7E-15
8852	150051_at	-1.47642	-0.0307622	-14.4387	2.0016e-15	1.43073e-13	25.1368	FBgn0038482	CG4053	CG4053	CG4053	42070	4252 // serine-type endopeptidase activity // non-traceable author statement /// 4263 // chymotrypsin activity // inferred from electronic annotation /// 4295 // trypsin activity // inferred from sequence or structural similarity /// 4295 // trypsin activity // inferred from sequence similarity	6508 // proteolysis // non-traceable author statement	---	IPR001254 // Peptidase S1, chymotrypsin // 4.4E-58
13127	154326_at	-0.843609	2.64958	-14.4318	2.02816e-15	1.44236e-13	25.1236	FBgn0027070	CG17322	CG17322	CG17322	35139	3851 // 2-hydroxyacylsphingosine 1-beta-galactosyltransferase activity // inferred from sequence or structural similarity /// 16740 // transferase activity // inferred from electronic annotation /// 16757 // transferase activity, transferring glycosyl groups // inferred from electronic annotation /// 16758 // transferase activity, transferring hexosyl groups // inferred from electronic annotation…	5976 // polysaccharide metabolism // inferred from electronic annotation /// 6952 // defense response // inferred from electronic annotation /// 8202 // steroid metabolism // inferred from electronic annotation /// 9636 // response to toxin // inferred from electronic annotation /// 8152 // metabolism // inferred from electronic annotation	---	IPR002213 // UDP-glucoronosyl/UDP-glucosyl transferase // 2.4E-40
7957	149156_at	-1.23893	2.17388	-14.4006	2.15205e-15	1.52274e-13	25.064	FBgn0037038	CG11037	CG11037	CG11037	40317	4252 // serine-type endopeptidase activity // inferred from sequence or structural similarity /// 4263 // chymotrypsin activity // inferred from electronic annotation /// 4295 // trypsin activity // non-traceable author statement /// 4252 // serine-type endopeptidase activity // inferred from electronic annotation /// 4252 // serine-type endopeptidase activity // inferred from sequence similarity	6508 // proteolysis // non-traceable author statement /// 6508 // proteolysis // inferred from electronic annotation	---	IPR001254 // Peptidase S1, chymotrypsin // 6.4E-55
11289	152488_at	-1.24332	3.23538	-14.38	2.23823e-15	1.57576e-13	25.0245	FBgn0040502	CG8343	CG8343	CG8343	35544	5537 // mannose binding // inferred from sequence or structural similarity /// 5529 // sugar binding // inferred from electronic annotation /// 5537 // mannose binding // inferred from sequence similarity	---	---	IPR001304 // C-type lectin // 2.5E-17
10580	151779_at	-1.12364	2.54368	-14.3579	2.33447e-15	1.6353e-13	24.9821	FBgn0032029	CG17292	CG17292	CG17292	34152	4806 // triacylglycerol lipase activity // inferred from sequence or structural similarity /// 5515 // protein binding // inferred from physical interaction /// 3824 // catalytic activity // inferred from electronic annotation /// 4806 // triacylglycerol lipase activity // inferred from sequence similarity	6629 // lipid metabolism // inferred from electronic annotation	---	IPR000734 // Lipase // 1.2E-30
6576	147775_at	-0.856803	2.53297	-14.3323	2.45148e-15	1.70619e-13	24.933	FBgn0034860	CG9812	CG9812	CG9812	37709	---	---	---	---
10652	151851_at	-1.60341	2.74052	-14.3186	2.51676e-15	1.73694e-13	24.9065	FBgn0027611	CG6206	CG6206	CG6206	34437	4559 // alpha-mannosidase activity // inferred from sequence or structural similarity /// 16799 // hydrolase activity, hydrolyzing N-glycosyl compounds // inferred from electronic annotation /// 5515 // protein binding // inferred from physical interaction /// 4559 // alpha-mannosidase activity // inferred from electronic annotation /// 15923 // mannosidase activity // inferred from electronic an…	5975 // carbohydrate metabolism // inferred from electronic annotation /// 6013 // mannose metabolism // inferred from electronic annotation	5764 // lysosome // inferred from sequence or structural similarity /// 5764 // lysosome // inferred from sequence similarity	IPR000602 // Glycoside hydrolase, family 38 // 1.0E-126
5421	146620_s_at	-1.3794	3.937	-14.2995	2.61028e-15	1.79265e-13	24.8698	FBgn0025814 /// FBgn0035793	CG1742	Mgstl /// CG7546	Microsomal glutathione S-transferase-like /// CG7546	38844 /// 44110	4364 // glutathione transferase activity // inferred from sequence or structural similarity /// 16740 // transferase activity // inferred from electronic annotation /// 4364 // glutathione transferase activity // inferred from sequence similarity	6464 // protein modification // inferred from electronic annotation /// 6952 // defense response // inferred from electronic annotation /// 9636 // response to toxin // inferred from electronic annotation	5741 // mitochondrial outer membrane // inferred from sequence or structural similarity /// 5792 // microsome // inferred from sequence or structural similarity /// 5741 // mitochondrial outer membrane // inferred from sequence similarity /// 5792 // microsome // inferred from sequence similarity	IPR001129 // Membrane-associated proteins in eicosanoid and glutathione metabolism (MAPEG) // 1.3E-66 /// IPR001129 // Membrane-associated proteins in eicosanoid and glutathione metabolism (MAPEG) // 1.7E-52
2387	143586_at	-1.50263	4.17303	-14.2804	2.70774e-15	1.85051e-13	24.8329	FBgn0010217	CG11154	ATPsyn-	ATP synthase-	43829	166 // nucleotide binding // inferred from electronic annotation /// 5524 // ATP binding // inferred from electronic annotation /// 8553 // hydrogen-exporting ATPase activity, phosphorylative mechanism // inferred from sequence or structural similarity /// 46933 // hydrogen-transporting ATP synthase activity, rotational mechanism // inferred from electronic annotation /// 46961 // hydrogen-transp…	6144 // purine base metabolism // inferred from electronic annotation /// 6754 // ATP biosynthesis // inferred from electronic annotation /// 6928 // cell motility // inferred from electronic annotation /// 7010 // cytoskeleton organization and biogenesis // inferred from electronic annotation /// 15986 // ATP synthesis coupled proton transport // inferred from electronic annotation /// 15992 // …	275 // proton-transporting ATP synthase complex, catalytic core F(1) (sensu Eukaryota) // inferred from sequence or structural similarity /// 5739 // mitochondrion // inferred from electronic annotation /// 16021 // integral to membrane // inferred from electronic annotation /// 16469 // proton-transporting two-sector ATPase complex // inferred from electronic annotation /// 45255 // hydrogen-tra…	IPR004100 // H+-transporting two-sector ATPase, alpha/beta subunit, N-terminal // 3.0E-31 /// IPR000194 // H+-transporting two-sector ATPase, alpha/beta subunit, central region // 3.8E-85 /// IPR000793 // H+-transporting two-sector ATPase, alpha/beta subunit, C-terminal // 1.2E-51
11864	153063_at	-0.886682	2.3302	-14.2744	2.73891e-15	1.86272e-13	24.8214	FBgn0032713	CG17323	CG17323	CG17323	35138	15020 // glucuronosyltransferase activity // inferred from sequence or structural similarity /// 16740 // transferase activity // inferred from electronic annotation /// 16757 // transferase activity, transferring glycosyl groups // inferred from electronic annotation /// 16758 // transferase activity, transferring hexosyl groups // inferred from electronic annotation /// 15020 // glucuronosyltra…	5976 // polysaccharide metabolism // inferred from electronic annotation /// 6952 // defense response // inferred from electronic annotation /// 8202 // steroid metabolism // inferred from electronic annotation /// 9636 // response to toxin // inferred from electronic annotation /// 8152 // metabolism // inferred from electronic annotation	---	IPR002213 // UDP-glucoronosyl/UDP-glucosyl transferase // 1.9E-42
9222	150421_at	-1.36282	3.06914	-14.2632	2.79881e-15	1.89426e-13	24.7997	FBgn0039049	CG6726	CG6726	CG6726	42728	4046 // aminoacylase activity // non-traceable author statement /// 8237 // metallopeptidase activity // inferred from electronic annotation /// 4046 // aminoacylase activity // inferred from electronic annotation /// 16787 // hydrolase activity // inferred from electronic annotation /// 46983 // protein dimerization activity // inferred from electronic annotation	6508 // proteolysis // inferred from electronic annotation /// 6520 // amino acid metabolism // inferred from electronic annotation	5737 // cytoplasm // inferred from electronic annotation	IPR002933 // Peptidase M20 // 7.9E-91 /// IPR002933 // Peptidase M20 // 7.9E-91
966	142165_at	-1.32846	3.7226	-14.2424	2.91271e-15	1.96188e-13	24.7596	FBgn0031245	CG3625	CG3625	CG3625	33198	---	---	---	IPR006838 // FAR-17a/AIG1-like protein // 6.7E-120 /// IPR006838 // FAR-17a/AIG1-like protein // 8.1E-119
11126	152325_at	-2.42236	2.1595	-14.17	3.34786e-15	2.22292e-13	24.6195	FBgn0039114	CG10374	Lsd-1	Lipid storage droplet-1	42810	5515 // protein binding // inferred from physical interaction /// 5319 // lipid transporter activity // inferred from expression pattern	19915 // sequestering of lipid // non-traceable author statement /// 6869 // lipid transport // inferred from expression pattern /// 19915 // sequestering of lipid // inferred from expression pattern /// 6810 // transport // inferred from electronic annotation /// 6869 // lipid transport // inferred from electronic annotation	5811 // lipid particle // inferred from direct assay	IPR004279 // Perilipin // 1.0E-126 /// IPR004279 // Perilipin // 1.3E-16 /// IPR004279 // Perilipin // 1.0E-126 /// IPR004279 // Perilipin // 1.3E-16 /// IPR004279 // Perilipin // 3.9E-109 /// IPR004279 // Perilipin // 1.3E-16
11865	153064_at	-2.14903	4.60333	-14.1255	3.64804e-15	2.4108e-13	24.5331	FBgn0032055	CG13091	CG13091	CG13091	34188	16491 // oxidoreductase activity // inferred from electronic annotation	---	---	IPR004262 // Male sterility protein // 1.4E-74
4186	145385_at	-1.45656	3.51332	-14.0793	3.98926e-15	2.62392e-13	24.4431	FBgn0031049	CG14214	CG14214	CG14214	32968	8565 // protein transporter activity // inferred from sequence or structural similarity /// 15450 // protein translocase activity // inferred from electronic annotation /// 8565 // protein transporter activity // inferred from sequence similarity	6616 // SRP-dependent cotranslational protein targeting to membrane, translocation // inferred from sequence or structural similarity /// 15031 // protein transport // inferred from sequence or structural similarity /// 16192 // vesicle-mediated transport // inferred from electronic annotation /// 6605 // protein targeting // inferred from electronic annotation /// 6810 // transport // inferred f…	5784 // translocon complex // inferred from sequence or structural similarity /// 30176 // integral to endoplasmic reticulum membrane // inferred from sequence or structural similarity /// 5783 // endoplasmic reticulum // inferred from electronic annotation /// 16020 // membrane // inferred from electronic annotation /// 16021 // integral to membrane // inferred from electronic annotation /// 578…	IPR001901 // Protein secE/sec61-gamma protein // 5.3E-22
3373	144572_at	-1.47493	1.6928	-14.0577	4.1603e-15	2.71097e-13	24.4009	FBgn0029838	CG4666	CG4666	CG4666	31541	---	---	---	---
8569	149768_s_at	-1.22362	3.16182	-14.0453	4.26143e-15	2.75127e-13	24.3767	FBgn0038037	CG11466	Cyp9f2	Cyp9f2	41520	4497 // monooxygenase activity // inferred from electronic annotation /// 16491 // oxidoreductase activity // inferred from electronic annotation /// 5506 // iron ion binding // inferred from electronic annotation /// 20037 // heme binding // inferred from electronic annotation /// 46872 // metal ion binding // inferred from electronic annotation	6118 // electron transport // inferred from electronic annotation	5792 // microsome // non-traceable author statement /// 16020 // membrane // non-traceable author statement /// 5783 // endoplasmic reticulum // inferred from electronic annotation /// 5792 // microsome // inferred from electronic annotation /// 16020 // membrane // inferred from electronic annotation	IPR001128 // Cytochrome P450 // 1.5E-76 /// IPR001128 // Cytochrome P450 // 1.5E-79
11320	152519_at	-0.959168	2.44705	-14.047	4.247e-15	2.75127e-13	24.3801	FBgn0033764	CG8776	CG8776	CG8776	36395	8805 // carbon-monoxide oxygenase activity // inferred from sequence or structural similarity /// 5515 // protein binding // inferred from physical interaction /// 4359 // glutaminase activity // inferred from electronic annotation /// 5509 // calcium ion binding // inferred from electronic annotation /// 3824 // catalytic activity // inferred from electronic annotation /// 51287 // NAD binding /…	6118 // electron transport // inferred from electronic annotation /// 7613 // memory // inferred from mutant phenotype /// 7626 // locomotory behavior // inferred from mutant phenotype /// 6541 // glutamine metabolism // inferred from electronic annotation /// 9225 // nucleotide-sugar metabolism // inferred from electronic annotation	16021 // integral to membrane // inferred from electronic annotation /// 30133 // transport vesicle // inferred from sequence or structural similarity /// 30133 // transport vesicle // inferred from sequence similarity	IPR004877 // Cytochrome b561 // 5.1E-101 /// IPR004877 // Cytochrome b561 // 2.6E-93 /// IPR004877 // Cytochrome b561 // 5.1E-101
219	141418_at	-2.53125	3.59773	-14.0252	4.43075e-15	2.84747e-13	24.3375	FBgn0036024	CG18180	CG18180	CG18180	39125	4263 // chymotrypsin activity // non-traceable author statement /// 4295 // trypsin activity // inferred from electronic annotation /// 4252 // serine-type endopeptidase activity // inferred from electronic annotation	6508 // proteolysis // non-traceable author statement /// 6508 // proteolysis // inferred from electronic annotation	---	IPR001254 // Peptidase S1, chymotrypsin // 4.4E-46
5547	146746_at	-1.34589	4.1275	-14.0135	4.53296e-15	2.87361e-13	24.3145	FBgn0033189	CG2140	Cyt-b5	Cyt-b5	35688	16491 // oxidoreductase activity // inferred from electronic annotation /// 5506 // iron ion binding // inferred from electronic annotation /// 46872 // metal ion binding // inferred from electronic annotation	6118 // electron transport // non-traceable author statement /// 8202 // steroid metabolism // inferred from electronic annotation /// 6118 // electron transport // inferred from electronic annotation /// 6810 // transport // inferred from electronic annotation	5792 // microsome // inferred from sequence or structural similarity /// 5792 // microsome // non-traceable author statement /// 16020 // membrane // non-traceable author statement /// 5783 // endoplasmic reticulum // inferred from electronic annotation /// 5792 // microsome // inferred from electronic annotation /// 16020 // membrane // inferred from electronic annotation /// 16021 // integral t…	IPR001199 // Cytochrome b5 // 2.3E-22 /// IPR001199 // Cytochrome b5 // 4.1E-9 /// IPR001199 // Cytochrome b5 // 4.1E-9
7096	148295_at	-1.00965	2.6953	-14.0155	4.5154e-15	2.87361e-13	24.3184	FBgn0035726	CG9953	CG9953	CG9953	38763	4188 // serine-type Pro-X carboxypeptidase activity // inferred from sequence or structural similarity /// 3824 // catalytic activity // inferred from electronic annotation /// 8233 // peptidase activity // inferred from electronic annotation /// 8236 // serine-type peptidase activity // inferred from electronic annotation /// 4188 // serine-type Pro-X carboxypeptidase activity // inferred from s…	6508 // proteolysis // inferred from electronic annotation	5764 // lysosome // inferred from electronic annotation	IPR008758 // Peptidase S28 // 1.0E-126
10297	151496_s_at	-1.72554	3.95175	-14.0144	4.52455e-15	2.87361e-13	24.3164	FBgn0027578	CG14526	CG14526	CG14526	43413	4245 // neprilysin activity // inferred from electronic annotation /// 8270 // zinc ion binding // inferred from electronic annotation /// 16511 // endothelin-converting enzyme activity // inferred from sequence or structural similarity /// 8233 // peptidase activity // inferred from electronic annotation /// 8237 // metallopeptidase activity // inferred from electronic annotation /// 16787 // hy…	6508 // proteolysis // inferred from electronic annotation /// 7165 // signal transduction // inferred from electronic annotation	16020 // membrane // inferred from electronic annotation	IPR008753 // Peptidase M13 // 9.3E-10 /// IPR000718 // Peptidase M13, neprilysin // 2.0E-46
348	141547_at	-1.24577	1.48321	-14.0088	4.57387e-15	2.88648e-13	24.3055	FBgn0004057	CG12529	Zw	Zwischenferment	32974	4345 // glucose-6-phosphate 1-dehydrogenase activity // inferred from sequence or structural similarity /// 4345 // glucose-6-phosphate 1-dehydrogenase activity // traceable author statement /// 5515 // protein binding // inferred from physical interaction /// 4345 // glucose-6-phosphate 1-dehydrogenase activity // inferred from electronic annotation /// 16491 // oxidoreductase activity // inferr…	6098 // pentose-phosphate shunt // non-traceable author statement /// 5975 // carbohydrate metabolism // inferred from electronic annotation /// 6006 // glucose metabolism // inferred from electronic annotation	---	IPR001282 // Glucose-6-phosphate dehydrogenase // 1.0E-126 /// IPR001282 // Glucose-6-phosphate dehydrogenase // 1.0E-126 /// IPR001282 // Glucose-6-phosphate dehydrogenase // 1.0E-126 /// IPR001282 // Glucose-6-phosphate dehydrogenase // 1.0E-126
9694	150893_f_at	-2.57058	4.23988	-13.9547	5.08234e-15	3.17873e-13	24.1994	FBgn0039778 /// FBgn0039777	CG2229 /// CG18030	Jon99Fi /// Jon99Fii	Jonah 99Fi /// Jonah 99Fii	43621 /// 43622	4252 // serine-type endopeptidase activity // inferred from sequence or structural similarity /// 4263 // chymotrypsin activity // inferred from electronic annotation /// 4295 // trypsin activity // inferred from electronic annotation /// 42708 // elastase activity // non-traceable author statement /// 3700 // transcription factor activity // inferred from mutant phenotype /// 4252 // serine-type…	6508 // proteolysis // non-traceable author statement /// 2168 // larval development (sensu Insecta) // inferred from mutant phenotype /// 7591 // molting cycle (sensu Insecta) // inferred from mutant phenotype /// 6508 // proteolysis // inferred from electronic annotation	5634 // nucleus // inferred from direct assay	IPR001254 // Peptidase S1, chymotrypsin // 8.0E-56 /// IPR001254 // Peptidase S1, chymotrypsin // 3.7E-55
5050	146249_at	-1.28182	1.22447	-13.9259	5.37635e-15	3.31818e-13	24.1428	FBgn0032373	CG12602	CG12602	CG12602	34587	5507 // copper ion binding // inferred from electronic annotation /// 8553 // hydrogen-exporting ATPase activity, phosphorylative mechanism // inferred from sequence or structural similarity /// 8553 // hydrogen-exporting ATPase activity, phosphorylative mechanism // inferred from sequence similarity	6812 // cation transport // inferred from electronic annotation /// 15992 // proton transport // inferred from electronic annotation	220 // hydrogen-transporting ATPase V0 domain // inferred from sequence or structural similarity /// 16020 // membrane // inferred from electronic annotation /// 220 // hydrogen-transporting ATPase V0 domain // inferred from sequence similarity	IPR002490 // V-type ATPase, 116 kDa subunit // 1.0E-126
3321	144520_at	-1.59792	1.68822	-13.922	5.41718e-15	3.32871e-13	24.1352	FBgn0029765	CG16756	CG16756	CG16756	31460	3796 // lysozyme activity // non-traceable author statement	6960 // antimicrobial humoral response (sensu Protostomia) // non-traceable author statement	5576 // extracellular region // inferred from electronic annotation	IPR001916 // Glycoside hydrolase, family 22 // 4.0E-37
2802	144001_at	-1.08021	0.683854	-13.8706	5.99061e-15	3.665e-13	24.0339	FBgn0023541	CG3540	Cyp4d14	Cyp4d14	45706	4497 // monooxygenase activity // inferred from electronic annotation /// 16491 // oxidoreductase activity // inferred from electronic annotation	6118 // electron transport // inferred from electronic annotation	5792 // microsome // non-traceable author statement /// 16020 // membrane // non-traceable author statement	IPR001128 // Cytochrome P450 // 7.8E-117
4780	145979_at	-1.08968	1.95201	-13.857	6.15205e-15	3.7474e-13	24.0071	FBgn0031942	CG7203	CG7203	CG7203	34055	---	---	---	---
6317	147516_at	-1.4764	4.48244	-13.8472	6.27168e-15	3.80373e-13	23.9877	FBgn0034470	CG11218	Obp56d	Odorant-binding protein 56d	37266	5549 // odorant binding // inferred from electronic annotation /// 5549 // odorant binding // inferred from sequence or structural similarity /// 5549 // odorant binding // non-traceable author statement /// 5549 // odorant binding // inferred from sequence similarity	6810 // transport // inferred from electronic annotation /// 7606 // sensory perception of chemical stimulus // inferred from sequence or structural similarity /// 19236 // response to pheromone // inferred from sequence or structural similarity /// 42048 // olfactory behavior // inferred from sequence or structural similarity /// 7608 // sensory perception of smell // inferred from expression pa…	5576 // extracellular region // inferred from sequence or structural similarity /// 5576 // extracellular region // inferred from sequence similarity	IPR006170 // Pheromone/general odorant binding protein, PBP/GOBP // 1.9E-31
8370	149569_at	-0.943628	2.63244	-13.8215	6.5955e-15	3.98289e-13	23.9371	FBgn0037715	CG9399	CG9399	CG9399	41157	5515 // protein binding // inferred from physical interaction	---	---	IPR005336 // Protein of unknown function UPF0041 // 3.0E-42
8831	150030_at	-1.75909	1.50163	-13.8179	6.64178e-15	3.99362e-13	23.93	FBgn0038449	CG17562	CG17562	CG17562	42021	16491 // oxidoreductase activity // inferred from electronic annotation	---	---	IPR004262 // Male sterility protein // 4.0E-117
3111	144310_at	-2.68974	2.9726	-13.793	6.97492e-15	4.15824e-13	23.8808	FBgn0028920	CG8997	CG8997	CG8997	34799	---	---	---	IPR004272 // Odorant binding protein // 4.9E-35
2405	143604_r_at	-2.27964	2.1609	-13.778	7.18376e-15	4.2646e-13	23.8511	FBgn0050025 /// FBgn0050031 /// FBgn0010359 /// FBgn0010358	CG30028 /// CG30031 /// CG30025 /// CG12351	CG30025 /// CG30031 /// Try	CG30025 /// CG30031 /// Trypsin /// Trypsin	246398 /// 246404 /// 36221 /// 48343	4252 // serine-type endopeptidase activity // non-traceable author statement /// 4263 // chymotrypsin activity // inferred from electronic annotation /// 4295 // trypsin activity // inferred from electronic annotation /// 4295 // trypsin activity // non-traceable author statement /// 4295 // trypsin activity // inferred from sequence or structural similarity /// 19899 // enzyme binding // inferre…	6508 // proteolysis // inferred from electronic annotation /// 6508 // proteolysis // non-traceable author statement /// 6508 // proteolysis // inferred from sequence or structural similarity /// 30422 // RNA interference, production of siRNA // inferred from mutant phenotype /// 30423 // RNA interference, targeting of mRNA for destruction // inferred from mutant phenotype /// 35196 // miRNA-medi…	5576 // extracellular region // non-traceable author statement /// 5576 // extracellular region // inferred from sequence or structural similarity /// 5576 // extracellular region // inferred from sequence similarity	IPR001254 // Peptidase S1, chymotrypsin // 1.7E-85
11370	152569_at	-1.25466	2.1324	-13.7508	7.57946e-15	4.48051e-13	23.7971	FBgn0033564 /// FBgn0061356	CG11919 /// CG18003	CG11919 /// CG18003	CG11919 /// CG18003	3771779 /// 3772165	8891 // glycolate oxidase activity // inferred from sequence or structural similarity /// 166 // nucleotide binding // inferred from electronic annotation /// 5524 // ATP binding // inferred from electronic annotation /// 17111 // nucleoside-triphosphatase activity // inferred from electronic annotation /// 16491 // oxidoreductase activity // inferred from electronic annotation /// 8891 // glycol…	6118 // electron transport // inferred from electronic annotation /// 7031 // peroxisome organization and biogenesis // inferred from sequence or structural similarity /// 7031 // peroxisome organization and biogenesis // inferred from sequence similarity	5777 // peroxisome // inferred from sequence or structural similarity /// 5777 // peroxisome // inferred from sequence similarity	---
10636	151835_at	-1.07592	0.983748	-13.671	8.87251e-15	5.22285e-13	23.6385	FBgn0035734	CG14823	CG14823	CG14823	38772	---	---	---	IPR008597 // Destabilase // 1.4E-71
420	141619_at	-1.2597	4.4462	-13.6315	9.59488e-15	5.62445e-13	23.5596	FBgn0021953	CG7400	Fatp	Fatty acid (long chain) transport protein	44227	3824 // catalytic activity // inferred from electronic annotation /// 5324 // long-chain fatty acid transporter activity // inferred from sequence or structural similarity /// 5324 // long-chain fatty acid transporter activity // inferred from sequence similarity	6631 // fatty acid metabolism // inferred from electronic annotation /// 15909 // long-chain fatty acid transport // inferred from sequence or structural similarity /// 8152 // metabolism // inferred from electronic annotation /// 15909 // long-chain fatty acid transport // inferred from sequence similarity	5886 // plasma membrane // inferred from sequence or structural similarity /// 5886 // plasma membrane // inferred from sequence similarity	IPR000873 // AMP-dependent synthetase and ligase // 9.3E-87
13531	154730_at	-1.30701	2.25702	-13.6292	9.63933e-15	5.62696e-13	23.555	FBgn0034618	CG9485	CG9485	CG9485	37435	4134 // 4-alpha-glucanotransferase activity // inferred from sequence or structural similarity /// 4135 // amylo-alpha-1,6-glucosidase activity // inferred from sequence or structural similarity /// 16799 // hydrolase activity, hydrolyzing N-glycosyl compounds // inferred from electronic annotation /// 4135 // amylo-alpha-1,6-glucosidase activity // inferred from electronic annotation /// 4134 //…	5977 // glycogen metabolism // inferred from electronic annotation /// 5978 // glycogen biosynthesis // inferred from electronic annotation	---	IPR010401 // Amylo-alpha-1,6-glucosidase // 1.0E-126 /// IPR010401 // Amylo-alpha-1,6-glucosidase // 1.0E-126 /// IPR010401 // Amylo-alpha-1,6-glucosidase // 1.0E-126
9500	150699_at	-1.93752	2.25955	-13.6073	1.00674e-14	5.85244e-13	23.5112	FBgn0039471	CG6295	CG6295	CG6295	43247	4806 // triacylglycerol lipase activity // inferred from sequence or structural similarity /// 8970 // phospholipase A1 activity // inferred from electronic annotation /// 3824 // catalytic activity // inferred from electronic annotation /// 4806 // triacylglycerol lipase activity // inferred from sequence similarity	6629 // lipid metabolism // inferred from electronic annotation	---	IPR000734 // Lipase // 5.1E-49
1754	142953_at	-0.964705	0.846451	-13.6003	1.02084e-14	5.90992e-13	23.4972	FBgn0030774	CG9675	CG9675	CG9675	32648	4252 // serine-type endopeptidase activity // non-traceable author statement /// 4263 // chymotrypsin activity // inferred from electronic annotation /// 4295 // trypsin activity // inferred from electronic annotation /// 5515 // protein binding // inferred from physical interaction /// 4252 // serine-type endopeptidase activity // inferred from electronic annotation	6508 // proteolysis // inferred from electronic annotation	---	IPR001254 // Peptidase S1, chymotrypsin // 4.2E-44
1976	143175_at	-1.50737	4.24515	-13.5684	1.0876e-14	6.25544e-13	23.4334	FBgn0001092	CG8893	Gapdh2	Glyceraldehyde 3 phosphate dehydrogenase 2	32545	4365 // glyceraldehyde-3-phosphate dehydrogenase (phosphorylating) activity // inferred from direct assay /// 4365 // glyceraldehyde-3-phosphate dehydrogenase (phosphorylating) activity // inferred from sequence or structural similarity /// 4365 // glyceraldehyde-3-phosphate dehydrogenase (phosphorylating) activity // non-traceable author statement /// 4365 // glyceraldehyde-3-phosphate dehydroge…	6096 // glycolysis // inferred from expression pattern /// 6096 // glycolysis // non-traceable author statement /// 6006 // glucose metabolism // inferred from electronic annotation /// 6096 // glycolysis // inferred from electronic annotation	5737 // cytoplasm // non-traceable author statement	IPR000173 // Glyceraldehyde 3-phosphate dehydrogenase // 4.8E-120 /// IPR000173 // Glyceraldehyde 3-phosphate dehydrogenase // 1.0E-126
6623	147822_at	-1.22933	0.06527	-13.5018	1.24211e-14	7.04531e-13	23.2996	FBgn0034942	CG13566	CG13566	CG13566	37813	---	---	---	---
11698	152897_at	-1.27551	1.9979	-13.4875	1.27803e-14	7.21985e-13	23.2709	FBgn0036422	CG3868	CG3868	CG3868	39580	---	---	---	---
3954	145153_at	-1.06923	1.60727	-13.4614	1.3465e-14	7.57607e-13	23.2184	FBgn0053173	CG33173	CG33173	CG33173	318910	166 // nucleotide binding // inferred from electronic annotation /// 5215 // transporter activity // inferred from sequence or structural similarity /// 5524 // ATP binding // inferred from electronic annotation /// 8061 // chitin binding // inferred from electronic annotation /// 42626 // ATPase activity, coupled to transmembrane movement of substances // inferred from sequence or structural sim…	6030 // chitin metabolism // inferred from electronic annotation /// 6810 // transport // inferred from sequence or structural similarity /// 6810 // transport // inferred from sequence similarity	5576 // extracellular region // inferred from electronic annotation /// 43190 // ATP-binding cassette (ABC) transporter complex // inferred from sequence or structural similarity /// 43190 // ATP-binding cassette (ABC) transporter complex // inferred from sequence similarity	IPR002557 // Chitin binding Peritrophin-A // 8.9E-19 /// IPR002557 // Chitin binding Peritrophin-A // 4.2E-15 /// IPR003439 // ABC transporter // 4.5E-25 /// IPR003439 // ABC transporter // 5.0E-21
2807	144006_at	-1.14084	0.41196	-13.4554	1.3629e-14	7.6377e-13	23.2062	FBgn0023550	CG18031	CG18031	CG18031	45707	16491 // oxidoreductase activity // inferred from electronic annotation	---	---	IPR004262 // Male sterility protein // 2.1E-12
1751	142950_at	-2.31747	2.6682	-13.4481	1.38283e-14	7.71852e-13	23.1915	FBgn0028533	CG7953	CG7953	CG7953	34801	---	---	---	---
10323	151522_at	-1.37578	4.07326	-13.428	1.4396e-14	8.00351e-13	23.151	FBgn0029155	CG5889	Mdh	Mdh	43936	4473 // malate dehydrogenase (oxaloacetate-decarboxylating) (NADP+) activity // inferred from sequence or structural similarity /// 4473 // malate dehydrogenase (oxaloacetate-decarboxylating) (NADP+) activity // non-traceable author statement /// 16831 // carboxy-lyase activity // inferred from electronic annotation /// 5515 // protein binding // inferred from physical interaction /// 4470 // mal…	6090 // pyruvate metabolism // inferred from sequence or structural similarity /// 6099 // tricarboxylic acid cycle // inferred from electronic annotation /// 6108 // malate metabolism // inferred from sequence or structural similarity /// 6108 // malate metabolism // inferred from electronic annotation /// 6090 // pyruvate metabolism // inferred from sequence similarity /// 6108 // malate metabo…	5739 // mitochondrion // inferred from sequence or structural similarity /// 5739 // mitochondrion // inferred from sequence similarity	IPR001891 // Malic oxidoreductase // 1.0E-126 /// IPR001891 // Malic oxidoreductase // 1.0E-126
10891	152090_at	-1.38141	3.22904	-13.3978	1.52967e-14	8.47061e-13	23.0899	FBgn0032394	CG6746	CG6746	CG6746	34614	4721 // phosphoprotein phosphatase activity // inferred from electronic annotation /// 16791 // phosphoric monoester hydrolase activity // inferred from electronic annotation	6464 // protein modification // inferred from electronic annotation /// 6468 // protein amino acid phosphorylation // inferred from electronic annotation /// 19538 // protein metabolism // inferred from electronic annotation	---	IPR007482 // Protein tyrosine phosphatase-like protein, PTPLA // 6.8E-93
4976	146175_at	-1.82322	3.82536	-13.3814	1.58096e-14	8.66503e-13	23.0566	FBgn0032275	CG17097	CG17097	CG17097	34461	4806 // triacylglycerol lipase activity // inferred from sequence or structural similarity /// 16298 // lipase activity // inferred from sequence or structural similarity /// 3824 // catalytic activity // inferred from electronic annotation /// 16787 // hydrolase activity // inferred from electronic annotation /// 16789 // carboxylic ester hydrolase activity // inferred from electronic annotation…	6629 // lipid metabolism // inferred from electronic annotation /// 6629 // lipid metabolism // inferred from sequence or structural similarity /// 16042 // lipid catabolism // inferred from electronic annotation /// 6629 // lipid metabolism // inferred from sequence similarity	---	IPR006693 // Ab-hydrolase associated lipase region // 7.9E-24 /// IPR006693 // Ab-hydrolase associated lipase region // 7.9E-24
11341	152540_at	-1.5305	-0.243591	-13.3838	1.5732e-14	8.66503e-13	23.0616	FBgn0031248	CG11912	CG11912	CG11912	33205	4252 // serine-type endopeptidase activity // inferred from sequence or structural similarity /// 4252 // serine-type endopeptidase activity // non-traceable author statement /// 4263 // chymotrypsin activity // inferred from electronic annotation /// 4295 // trypsin activity // inferred from electronic annotation /// 4252 // serine-type endopeptidase activity // inferred from electronic annotati…	6508 // proteolysis // non-traceable author statement /// 6508 // proteolysis // inferred from electronic annotation	---	IPR001254 // Peptidase S1, chymotrypsin // 5.3E-55
1013	142212_at	-1.3512	2.15286	-13.3725	1.60959e-14	8.73068e-13	23.0386	FBgn0010651	CG15095	l(2)08717	lethal (2) 08717	46085	5316 // high affinity inorganic phosphate:sodium symporter activity // inferred from sequence or structural similarity /// 5215 // transporter activity // inferred from electronic annotation /// 5316 // high affinity inorganic phosphate:sodium symporter activity // inferred from sequence similarity	5975 // carbohydrate metabolism // inferred from electronic annotation /// 6796 // phosphate metabolism // inferred from electronic annotation /// 6812 // cation transport // inferred from electronic annotation /// 6817 // phosphate transport // inferred from electronic annotation /// 6858 // extracellular transport // inferred from electronic annotation /// 6810 // transport // inferred from ele…	16021 // integral to membrane // inferred from electronic annotation /// 16020 // membrane // inferred from electronic annotation	IPR005828 // General substrate transporter // 9.5E-5
13988	AFFX-Dros-GAPDH_3_at	-1.45508	4.64258	-13.3711	1.61402e-14	8.73068e-13	23.0358	---	---	---	---	---	166 // nucleotide binding // inferred from electronic annotation /// 3676 // nucleic acid binding // inferred from electronic annotation /// 3677 // DNA binding // inferred from electronic annotation /// 3723 // RNA binding // inferred from electronic annotation /// 3743 // translation initiation factor activity // inferred from electronic annotation /// 4386 // helicase activity // inferred from…	381 // regulation of alternative nuclear mRNA splicing, via spliceosome // inferred from mutant phenotype /// 6412 // protein biosynthesis // inferred from electronic annotation /// 2168 // larval development (sensu Insecta) // traceable author statement /// 7446 // imaginal disc growth // traceable author statement	---	---
12529	153728_at	-1.02134	2.77892	-13.3628	1.64126e-14	8.84386e-13	23.0189	FBgn0012037 /// FBgn0082762	CG8827	Ance /// DsimAnce	Angiotensin converting enzyme /// Ance	34805	4246 // peptidyl-dipeptidase A activity // inferred from direct assay /// 4246 // peptidyl-dipeptidase A activity // non-traceable author statement /// 4246 // peptidyl-dipeptidase A activity // traceable author statement /// 8241 // peptidyl-dipeptidase activity // inferred from sequence or structural similarity /// 8270 // zinc ion binding // non-traceable author statement /// 4180 // carboxype…	6508 // proteolysis // inferred from electronic annotation /// 7289 // spermatid nuclear differentiation // inferred from mutant phenotype /// 7291 // sperm individualization // inferred from mutant phenotype /// 46698 // metamorphosis (sensu Insecta) // inferred from expression pattern	5576 // extracellular region // non-traceable author statement /// 16020 // membrane // inferred from electronic annotation	IPR001548 // Peptidase M2, peptidyl-dipeptidase A // 1.0E-126
236	141435_at	-2.2463	2.45129	-13.3484	1.68931e-14	9.03547e-13	22.9899	FBgn0031249	CG11911	CG11911	CG11911	33206	4252 // serine-type endopeptidase activity // inferred from sequence or structural similarity /// 4263 // chymotrypsin activity // non-traceable author statement /// 4295 // trypsin activity // inferred from electronic annotation /// 4252 // serine-type endopeptidase activity // inferred from electronic annotation /// 8236 // serine-type peptidase activity // inferred from electronic annotation /…	6508 // proteolysis // non-traceable author statement /// 6508 // proteolysis // inferred from electronic annotation	---	IPR001254 // Peptidase S1, chymotrypsin // 1.6E-63
9387	150586_at	-1.61156	3.25108	-13.3483	1.68972e-14	9.03547e-13	22.9896	FBgn0039324	CG10553	CG10553	CG10553	43064	---	---	---	IPR004119 // Protein of unknown function DUF227 // 1.8E-95
3476	144675_at	-1.94626	2.77967	-13.3359	1.73247e-14	9.22886e-13	22.9644	FBgn0029994	CG2254	CG2254	CG2254	31726	16491 // oxidoreductase activity // inferred from sequence or structural similarity /// 16491 // oxidoreductase activity // inferred from electronic annotation /// 16491 // oxidoreductase activity // inferred from sequence similarity	7601 // visual perception // inferred from electronic annotation /// 8152 // metabolism // inferred from electronic annotation	---	IPR002198 // Short-chain dehydrogenase/reductase SDR // 2.3E-49
7935	149134_at	-1.19541	2.55981	-13.2977	1.87129e-14	9.89311e-13	22.8868	FBgn0037004	CG17637	CG17637	CG17637	40275	15144 // carbohydrate transporter activity // inferred from sequence or structural similarity /// 15520 // tetracycline:hydrogen antiporter activity // inferred from electronic annotation /// 15144 // carbohydrate transporter activity // inferred from sequence similarity	5975 // carbohydrate metabolism // inferred from electronic annotation /// 8643 // carbohydrate transport // inferred from electronic annotation /// 15904 // tetracycline transport // inferred from electronic annotation	16021 // integral to membrane // inferred from electronic annotation	---
6437	147636_at	-1.08185	2.13448	-13.2693	1.98158e-14	1.04368e-12	22.8291	FBgn0034662	CG13492	CG13492	CG13492	37487	4365 // glyceraldehyde-3-phosphate dehydrogenase (phosphorylating) activity // inferred from electronic annotation	6096 // glycolysis // inferred from electronic annotation	---	IPR008472 // Protein of unknown function DUF753 // 2.7E-8 /// IPR008472 // Protein of unknown function DUF753 // 3.2E-22 /// IPR008472 // Protein of unknown function DUF753 // 3.3E-50 /// IPR008472 // Protein of unknown function DUF753 // 6.2E-39 /// IPR008472 // Protein of unknown function DUF753 // 2.3E-5 /// IPR008472 // Protein of unknown function DUF753 // 1.0E-126 /// IPR008472 // Protein o…
4698	145897_at	-1.87069	2.99703	-13.2585	2.02555e-14	1.06285e-12	22.807	FBgn0031810	CG9511	CG9511	CG9511	33894	---	---	---	---
10709	151908_at	-1.12202	2.36621	-13.2552	2.03888e-14	1.06585e-12	22.8004	FBgn0030668	CG8128	CG8128	CG8128	32504	16791 // phosphoric monoester hydrolase activity // inferred from electronic annotation /// 19204 // nucleotide phosphatase activity // inferred from electronic annotation /// 16787 // hydrolase activity // inferred from electronic annotation	6139 // nucleobase, nucleoside, nucleotide and nucleic acid metabolism // inferred from electronic annotation /// 6397 // mRNA processing // inferred from electronic annotation /// 8283 // cell proliferation // inferred from electronic annotation	---	IPR000086 // NUDIX hydrolase // 8.2E-28
13597	154796_at	-0.875905	1.96098	-13.2373	2.11406e-14	1.10104e-12	22.7639	FBgn0037203	CG11128	slif	slimfast	40510	15171 // amino acid transporter activity // non-traceable author statement /// 15326 // cationic amino acid transporter activity // inferred from sequence or structural similarity /// 15326 // cationic amino acid transporter activity // traceable author statement /// 5515 // protein binding // inferred from physical interaction /// 5279 // amino acid-polyamine transporter activity // inferred fro…	6520 // amino acid metabolism // inferred from electronic annotation /// 6865 // amino acid transport // inferred from electronic annotation /// 6865 // amino acid transport // traceable author statement /// 40007 // growth // traceable author statement /// 6810 // transport // inferred from electronic annotation	16020 // membrane // inferred from electronic annotation /// 16021 // integral to membrane // inferred from electronic annotation	IPR004841 // Amino acid permease-associated region // 7.6E-17
1054	142253_at	-1.42813	2.74185	-13.2245	2.16982e-14	1.11761e-12	22.7376	FBgn0039325	CG10560	CG10560	CG10560	43065	16301 // kinase activity // inferred from electronic annotation /// 16740 // transferase activity // inferred from electronic annotation	---	---	IPR004119 // Protein of unknown function DUF227 // 6.7E-111
11170	152369_at	-2.08174	3.60346	-13.2261	2.16268e-14	1.11761e-12	22.741	FBgn0032049	CG13095	CG13095	CG13095	34182	4190 // aspartic-type endopeptidase activity // inferred from sequence or structural similarity /// 4194 // pepsin A activity // inferred from electronic annotation /// 4190 // aspartic-type endopeptidase activity // inferred from electronic annotation /// 8233 // peptidase activity // inferred from electronic annotation /// 16787 // hydrolase activity // inferred from electronic annotation /// 4…	6508 // proteolysis // inferred from electronic annotation	---	IPR001461 // Peptidase A1, pepsin // 1.0E-126
2403	143602_at	-2.88301	4.36375	-13.222	2.18093e-14	1.11922e-12	22.7325	FBgn0010357	CG18211	Try	Trypsin	47901	4263 // chymotrypsin activity // inferred from electronic annotation /// 4295 // trypsin activity // non-traceable author statement /// 4252 // serine-type endopeptidase activity // inferred from electronic annotation /// 4295 // trypsin activity // inferred from electronic annotation /// 8233 // peptidase activity // inferred from electronic annotation /// 16787 // hydrolase activity // inferred…	6508 // proteolysis // non-traceable author statement /// 6508 // proteolysis // inferred from electronic annotation	5576 // extracellular region // non-traceable author statement	IPR001254 // Peptidase S1, chymotrypsin // 2.8E-88
9058	150257_at	-2.28003	3.23839	-13.2113	2.22851e-14	1.13947e-12	22.7107	FBgn0038790	CG5097	MtnC	Metallothionein C	42416	46872 // metal ion binding // inferred from electronic annotation	---	---	IPR000966 // Diptera metallothionein, family 5 // 8.7E-17
10876	152075_at	-1.15633	0.886222	-13.2042	2.26093e-14	1.14767e-12	22.6962	FBgn0034796	CG3700	CG3700	CG3700	37640	4252 // serine-type endopeptidase activity // inferred from sequence or structural similarity /// 4263 // chymotrypsin activity // inferred from electronic annotation /// 4295 // trypsin activity // non-traceable author statement /// 4252 // serine-type endopeptidase activity // inferred from electronic annotation /// 8233 // peptidase activity // inferred from electronic annotation /// 16787 // …	6508 // proteolysis // non-traceable author statement /// 6508 // proteolysis // inferred from electronic annotation	---	IPR001254 // Peptidase S1, chymotrypsin // 2.3E-63
2268	143467_f_at	-3.01511	3.06298	-13.1884	2.33442e-14	1.17645e-12	22.6639	FBgn0004428	CG1180	LysE	Lysozyme E	38128	3796 // lysozyme activity // inferred from sequence or structural similarity /// 3796 // lysozyme activity // non-traceable author statement /// 3796 // lysozyme activity // inferred from electronic annotation /// 3796 // lysozyme activity // inferred from sequence similarity	6960 // antimicrobial humoral response (sensu Protostomia) // non-traceable author statement /// 16998 // cell wall catabolism // inferred from electronic annotation	5576 // extracellular region // inferred from electronic annotation	IPR001916 // Glycoside hydrolase, family 22 // 1.0E-67 /// IPR001916 // Glycoside hydrolase, family 22 // 1.0E-67
7781	148980_at	-1.52662	2.59174	-13.177	2.38921e-14	1.19619e-12	22.6406	FBgn0036766	CG5506	CG5506	CG5506	39992	---	---	---	---
550	141749_at	-2.18632	4.09016	-13.1586	2.48031e-14	1.23646e-12	22.6029	FBgn0013576	CG32464	l(3)82Fd	l(3)82Fd	45467	5515 // protein binding // inferred from physical interaction	16998 // cell wall catabolism // inferred from electronic annotation	---	IPR002482 // Peptidoglycan-binding LysM // 1.0E-15 /// IPR002482 // Peptidoglycan-binding LysM // 1.0E-15
2238	143437_at	-2.47757	5.68096	-13.1454	2.54808e-14	1.2585e-12	22.5757	FBgn0011694	CG2665	PebII	Protein ejaculatory bulb II	326108	5198 // structural molecule activity // inferred from sequence or structural similarity	45297 // post-mating behavior // inferred from sequence or structural similarity /// 7610 // behavior // inferred from electronic annotation	5576 // extracellular region // non-traceable author statement	---
2409	143608_at	-1.71213	3.90659	-13.1301	2.62873e-14	1.28771e-12	22.5443	FBgn0010387	CG8627	Dbi	Diazepam-binding inhibitor	38784	62 // acyl-CoA binding // inferred from sequence or structural similarity /// 62 // acyl-CoA binding // non-traceable author statement /// 62 // acyl-CoA binding // traceable author statement /// 4857 // enzyme inhibitor activity // inferred from sequence or structural similarity /// 5386 // carrier activity // inferred from electronic annotation /// 50809 // diazepam binding // inferred from seq…	6869 // lipid transport // inferred from electronic annotation /// 42049 // cell acyl-CoA homeostasis // inferred from sequence or structural similarity /// 42049 // cell acyl-CoA homeostasis // non-traceable author statement /// 6810 // transport // inferred from electronic annotation /// 42049 // cell acyl-CoA homeostasis // inferred from sequence similarity	---	IPR000582 // Acyl-coA-binding protein, ACBP // 1.1E-54
12182	153381_at	-1.51791	4.55399	-13.1234	2.66439e-14	1.30063e-12	22.5307	FBgn0031914	CG5973	CG5973	CG5973	34023	5386 // carrier activity // inferred from electronic annotation /// 16918 // retinal binding // inferred from sequence or structural similarity /// 5515 // protein binding // inferred from physical interaction /// 5215 // transporter activity // inferred from electronic annotation /// 16918 // retinal binding // inferred from sequence similarity	6732 // coenzyme metabolism // inferred from electronic annotation /// 6810 // transport // inferred from electronic annotation /// 51189 // prosthetic group metabolism // inferred from electronic annotation	5885 // Arp2/3 protein complex // inferred from sequence or structural similarity /// 5622 // intracellular // inferred from electronic annotation /// 5885 // Arp2/3 protein complex // inferred from sequence similarity	IPR001251 // Cellular retinaldehyde-binding)/triple function, C-terminal // 9.6E-20
8474	149673_at	-0.717546	3.02704	-13.1121	2.72682e-14	1.3219e-12	22.5074	FBgn0037873	CG6666	CG6666	CG6666	41340	104 // succinate dehydrogenase activity // inferred from sequence or structural similarity /// 8177 // succinate dehydrogenase (ubiquinone) activity // inferred from sequence or structural similarity /// 104 // succinate dehydrogenase activity // inferred from electronic annotation /// 104 // succinate dehydrogenase activity // inferred from sequence similarity /// 8177 // succinate dehydrogenase…	6099 // tricarboxylic acid cycle // inferred from sequence or structural similarity /// 6105 // succinate metabolism // inferred from sequence or structural similarity /// 6121 // mitochondrial electron transport, succinate to ubiquinone // inferred from sequence or structural similarity /// 6099 // tricarboxylic acid cycle // inferred from electronic annotation /// 6118 // electron transport // …	5749 // respiratory chain complex II (sensu Eukaryota) // inferred from sequence or structural similarity /// 16020 // membrane // inferred from electronic annotation /// 5749 // respiratory chain complex II (sensu Eukaryota) // inferred from sequence similarity	IPR000701 // Succinate dehydrogenase, cytochrome b subunit // 5.5E-52
2462	143661_at	-0.857132	0.859319	-13.1042	2.771e-14	1.33868e-12	22.4912	FBgn0011556	CG12387	Try	Trypsin	36216	4263 // chymotrypsin activity // inferred from electronic annotation /// 4295 // trypsin activity // inferred from sequence or structural similarity /// 4295 // trypsin activity // non-traceable author statement /// 5515 // protein binding // inferred from physical interaction /// 4252 // serine-type endopeptidase activity // inferred from electronic annotation /// 4295 // trypsin activity // inf…	6508 // proteolysis // non-traceable author statement /// 6508 // proteolysis // inferred from electronic annotation	5576 // extracellular region // non-traceable author statement	IPR001254 // Peptidase S1, chymotrypsin // 3.5E-74
8993	150192_at	-1.10717	1.93784	-13.055	3.06408e-14	1.47518e-12	22.3898	FBgn0038701	CG18493	CG18493	CG18493	42319	8233 // peptidase activity // inferred from electronic annotation /// 8236 // serine-type peptidase activity // inferred from electronic annotation /// 3824 // catalytic activity // inferred from electronic annotation	6508 // proteolysis // inferred from electronic annotation /// 19538 // protein metabolism // inferred from electronic annotation	5764 // lysosome // inferred from electronic annotation	IPR008758 // Peptidase S28 // 1.0E-126
9696	150895_at	-1.06284	0.796866	-13.025	3.25757e-14	1.55233e-12	22.3281	FBgn0051371	CG31371	CG31371	CG31371	43626	---	---	---	---
7054	148253_at	-2.25577	4.64296	-12.9972	3.449e-14	1.63415e-12	22.2705	FBgn0035664	CG6467	Jon65Aiv	Jonah 65Aiv	38682	4252 // serine-type endopeptidase activity // inferred from sequence or structural similarity /// 4263 // chymotrypsin activity // non-traceable author statement /// 4295 // trypsin activity // inferred from electronic annotation /// 5515 // protein binding // inferred from physical interaction /// 4252 // serine-type endopeptidase activity // inferred from electronic annotation /// 8233 // pepti…	6508 // proteolysis // non-traceable author statement /// 6508 // proteolysis // inferred from electronic annotation	---	IPR001254 // Peptidase S1, chymotrypsin // 6.5E-70
12251	153450_at	-0.983164	3.16485	-12.9947	3.46691e-14	1.6354e-12	22.2653	FBgn0030724	CG9212	Nipsnap	Nipsnap	32573	5515 // protein binding // inferred from physical interaction /// 42802 // identical protein binding // inferred from physical interaction	---	---	---
2750	143949_at	-1.11343	2.39909	-12.9328	3.93661e-14	1.83839e-12	22.1372	FBgn0021765	CG7113	scu	scully	32789	3857 // 3-hydroxyacyl-CoA dehydrogenase activity // inferred from sequence or structural similarity /// 3857 // 3-hydroxyacyl-CoA dehydrogenase activity // non-traceable author statement /// 4303 // estradiol 17-beta-dehydrogenase activity // inferred from direct assay /// 16229 // steroid dehydrogenase activity // inferred from direct assay /// 18454 // acetoacetyl-CoA reductase activity // infe…	6631 // fatty acid metabolism // inferred from direct assay /// 6633 // fatty acid biosynthesis // inferred from electronic annotation /// 6635 // fatty acid beta-oxidation // inferred from electronic annotation /// 6637 // acyl-CoA metabolism // inferred from direct assay /// 8202 // steroid metabolism // inferred from direct assay /// 8205 // ecdysone metabolism // inferred from direct assay //…	5739 // mitochondrion // non-traceable author statement /// 5829 // cytosol // non-traceable author statement /// 5739 // mitochondrion // inferred from sequence or structural similarity /// 5739 // mitochondrion // inferred from electronic annotation	IPR002198 // Short-chain dehydrogenase/reductase SDR // 4.9E-59
2576	143775_at	-1.77351	0.865695	-12.9284	3.97298e-14	1.84922e-12	22.128	FBgn0015001	CG7754	Try	Trypsin	36223	4263 // chymotrypsin activity // inferred from electronic annotation /// 4295 // trypsin activity // inferred from sequence or structural similarity /// 4295 // trypsin activity // non-traceable author statement /// 4252 // serine-type endopeptidase activity // inferred from electronic annotation /// 8233 // peptidase activity // inferred from electronic annotation /// 16787 // hydrolase activity…	6508 // proteolysis // non-traceable author statement /// 6508 // proteolysis // inferred from electronic annotation	5576 // extracellular region // non-traceable author statement	IPR001254 // Peptidase S1, chymotrypsin // 3.8E-91
569	141768_at	-0.919484	3.47915	-12.9072	4.15029e-14	1.92535e-12	22.084	FBgn0022708	CG3140	Adk2	Adenylate kinase-2	37834	4017 // adenylate kinase activity // inferred from sequence or structural similarity /// 5524 // ATP binding // inferred from electronic annotation /// 5515 // protein binding // inferred from physical interaction /// 4017 // adenylate kinase activity // inferred from electronic annotation /// 16301 // kinase activity // inferred from electronic annotation /// 16740 // transferase activity // inf…	6144 // purine base metabolism // inferred from electronic annotation /// 6172 // ADP biosynthesis // inferred from sequence or structural similarity /// 6139 // nucleobase, nucleoside, nucleotide and nucleic acid metabolism // inferred from electronic annotation /// 6172 // ADP biosynthesis // inferred from sequence similarity	5739 // mitochondrion // inferred from sequence or structural similarity /// 5758 // mitochondrial intermembrane space // inferred from sequence or structural similarity /// 5739 // mitochondrion // inferred from sequence similarity /// 5758 // mitochondrial intermembrane space // inferred from sequence similarity	IPR000850 // Adenylate kinase // 5.8E-94 /// IPR007862 // Adenylate kinase, lid region // 2.3E-23
9283	150482_at	-1.48288	1.34264	-12.8941	4.26391e-14	1.96505e-12	22.0567	FBgn0039151	CG13607	CG13607	CG13607	42859	---	---	---	---
3927	145126_at	-0.960646	0.252373	-12.8774	4.41284e-14	2.02701e-12	22.0221	FBgn0027287	CG33206	l(1)G0168	lethal (1) G0168	32483	3676 // nucleic acid binding // inferred from electronic annotation /// 5200 // structural constituent of cytoskeleton // inferred from electronic annotation	6139 // nucleobase, nucleoside, nucleotide and nucleic acid metabolism // inferred from electronic annotation /// 7010 // cytoskeleton organization and biogenesis // inferred from electronic annotation	---	---
5611	146810_at	-1.83435	2.48543	-12.8614	4.5616e-14	2.0885e-12	21.9887	FBgn0033297	CG8690	CG8690	CG8690	35830	4556 // alpha-amylase activity // inferred from electronic annotation /// 4558 // alpha-glucosidase activity // inferred from sequence or structural similarity /// 5215 // transporter activity // inferred from electronic annotation /// 4558 // alpha-glucosidase activity // inferred from sequence similarity	5975 // carbohydrate metabolism // inferred from electronic annotation	---	IPR006047 // Alpha amylase, catalytic domain // 2.2E-111
3991	145190_at	-0.855037	0.749214	-12.8587	4.58702e-14	2.09329e-12	21.9831	FBgn0030756	CG9903	CG9903	CG9903	32621	8508 // bile acid:sodium symporter activity // inferred from sequence or structural similarity /// 8508 // bile acid:sodium symporter activity // inferred from electronic annotation /// 8508 // bile acid:sodium symporter activity // inferred from sequence similarity	6812 // cation transport // inferred from electronic annotation /// 6814 // sodium ion transport // inferred from electronic annotation	16020 // membrane // inferred from electronic annotation	IPR002657 // Bile acid:sodium symporter // 6.7E-14
1254	142453_at	-1.21	1.17351	-12.8464	4.70463e-14	2.13999e-12	21.9576	FBgn0040321	CG5008	GNBP3	Gram-negative bacteria binding protein 3	39020	8329 // pattern recognition receptor activity // inferred from sequence or structural similarity /// 8329 // pattern recognition receptor activity // non-traceable author statement /// 8368 // Gram-negative bacterial binding // non-traceable author statement /// 15926 // glucosidase activity // inferred from electronic annotation /// 8367 // bacterial binding // inferred from sequence or structur…	5976 // polysaccharide metabolism // inferred from electronic annotation /// 6952 // defense response // non-traceable author statement /// 9620 // response to fungi // non-traceable author statement /// 42830 // defense response to pathogenic bacteria // inferred from sequence or structural similarity /// 45088 // regulation of innate immune response // inferred from sequence or structural simil…	5576 // extracellular region // inferred from sequence or structural similarity	IPR000757 // Glycoside hydrolase, family 16 // 5.6E-5
2090	143289_at	-1.10665	4.58053	-12.8329	4.83869e-14	2.19385e-12	21.9292	FBgn0003034	CG17673	Acp70A	Accessory gland peptide 70A	39494	5179 // hormone activity // non-traceable author statement /// 5515 // protein binding // inferred from physical interaction	6718 // juvenile hormone biosynthesis // non-traceable author statement /// 7557 // regulation of juvenile hormone biosynthesis // traceable author statement /// 7621 // negative regulation of female receptivity // non-traceable author statement /// 7621 // negative regulation of female receptivity // traceable author statement /// 9993 // oogenesis (sensu Insecta) // traceable author statement /…	5576 // extracellular region // non-traceable author statement /// 5576 // extracellular region // traceable author statement	---
10970	152169_at	-0.973517	0.41798	-12.8312	4.8557e-14	2.19446e-12	21.9257	FBgn0036764	CG5535	CG5535	CG5535	39990	15326 // cationic amino acid transporter activity // inferred from sequence or structural similarity /// 5279 // amino acid-polyamine transporter activity // inferred from electronic annotation /// 15326 // cationic amino acid transporter activity // inferred from sequence similarity	6520 // amino acid metabolism // inferred from electronic annotation /// 6865 // amino acid transport // inferred from electronic annotation /// 6865 // amino acid transport // inferred from sequence or structural similarity /// 6810 // transport // inferred from electronic annotation /// 6865 // amino acid transport // inferred from sequence similarity	16020 // membrane // inferred from electronic annotation /// 16021 // integral to membrane // inferred from electronic annotation	IPR004841 // Amino acid permease-associated region // 5.8E-7 /// IPR004841 // Amino acid permease-associated region // 5.4E-13 /// IPR004841 // Amino acid permease-associated region // 5.8E-7 /// IPR004841 // Amino acid permease-associated region // 5.4E-13
5177	146376_at	-0.963116	1.75042	-12.8228	4.94061e-14	2.22566e-12	21.9082	FBgn0032603	CG17928	CG17928	CG17928	35009	16491 // oxidoreductase activity // inferred from electronic annotation	---	---	IPR005804 // Fatty acid desaturase // 3.1E-34 /// IPR001199 // Cytochrome b5 // 4.5E-18
2597	143796_at	-0.848348	0.975602	-12.7985	5.19606e-14	2.33323e-12	21.8574	FBgn0015316	CG9564	Try29F	Trypsin 29F	34226	4263 // chymotrypsin activity // inferred from electronic annotation /// 4295 // trypsin activity // inferred from sequence or structural similarity /// 4295 // trypsin activity // non-traceable author statement /// 8233 // peptidase activity // inferred from electronic annotation /// 8236 // serine-type peptidase activity // inferred from electronic annotation /// 4252 // serine-type endopeptida…	6508 // proteolysis // non-traceable author statement /// 6508 // proteolysis // inferred from electronic annotation	---	IPR001254 // Peptidase S1, chymotrypsin // 7.3E-89
6466	147665_at	-1.88245	2.05608	-12.7773	5.42947e-14	2.43025e-12	21.8131	FBgn0034711	CG3290	CG3290	CG3290	37539	4035 // alkaline phosphatase activity // inferred from sequence or structural similarity /// 19204 // nucleotide phosphatase activity // inferred from electronic annotation /// 287 // magnesium ion binding // inferred from electronic annotation /// 8270 // zinc ion binding // inferred from electronic annotation /// 16787 // hydrolase activity // inferred from electronic annotation /// 4035 // alk…	1501 // skeletal development // inferred from electronic annotation /// 7498 // mesoderm development // inferred from electronic annotation /// 8152 // metabolism // inferred from electronic annotation	---	IPR001952 // Alkaline phosphatase // 8.0E-84
1203	142402_at	-1.23831	1.5392	-12.7604	5.6229e-14	2.50882e-12	21.7778	FBgn0037678	CG16749	CG16749	CG16749	41111	4252 // serine-type endopeptidase activity // inferred from sequence or structural similarity /// 4252 // serine-type endopeptidase activity // non-traceable author statement /// 4263 // chymotrypsin activity // inferred from electronic annotation /// 4295 // trypsin activity // inferred from electronic annotation /// 4252 // serine-type endopeptidase activity // inferred from electronic annotati…	6508 // proteolysis // non-traceable author statement /// 6508 // proteolysis // inferred from electronic annotation	---	IPR001254 // Peptidase S1, chymotrypsin // 5.2E-67
10296	151495_at	-1.39246	3.41237	-12.7335	5.94606e-14	2.64458e-12	21.7214	FBgn0028491	CG2930	CG2930	CG2930	31341	5427 // proton-dependent oligopeptide transporter activity // inferred from sequence or structural similarity /// 5215 // transporter activity // inferred from electronic annotation /// 5427 // proton-dependent oligopeptide transporter activity // inferred from sequence similarity	6810 // transport // inferred from electronic annotation /// 6857 // oligopeptide transport // inferred from electronic annotation	16020 // membrane // inferred from electronic annotation	IPR000109 // TGF-beta receptor, type I/II extracellular region // 9.7E-102 /// IPR000109 // TGF-beta receptor, type I/II extracellular region // 1.2E-7
6808	148007_at	-0.78522	0.431824	-12.6944	6.4506e-14	2.85088e-12	21.6393	FBgn0035280	CG13935	CG13935	CG13935	38240	5214 // structural constituent of cuticle (sensu Insecta) // inferred from sequence or structural similarity /// 5515 // protein binding // inferred from physical interaction /// 42302 // structural constituent of cuticle // inferred from electronic annotation /// 5214 // structural constituent of cuticle (sensu Insecta) // inferred from sequence similarity	---	---	IPR000618 // Insect cuticle protein // 4.2E-31
111	141310_at	-1.79526	1.72116	-12.6777	6.68028e-14	2.92471e-12	21.604	FBgn0039760	CG9682	CG9682	CG9682	43602	---	---	---	IPR004238 // Late embryogenesis abundant protein // 7.1E-9 /// IPR004238 // Late embryogenesis abundant protein // 2.1E-10
8631	149830_at	-1.15902	0.26194	-12.6504	7.07163e-14	3.0864e-12	21.5466	FBgn0038132	CG15887	CG15887	CG15887	41631	---	---	---	---
10478	151677_at	-1.56244	3.06885	-12.6329	7.33504e-14	3.19143e-12	21.5097	FBgn0052479	CG32479	CG32479	CG32479	38103	4197 // cysteine-type endopeptidase activity // inferred from electronic annotation /// 4221 // ubiquitin thiolesterase activity // inferred from electronic annotation /// 4843 // ubiquitin-specific protease activity // inferred from sequence or structural similarity /// 4843 // ubiquitin-specific protease activity // inferred from sequence similarity	6508 // proteolysis // inferred from electronic annotation /// 6511 // ubiquitin-dependent protein catabolism // inferred from electronic annotation /// 16579 // protein deubiquitination // inferred from sequence or structural similarity /// 16579 // protein deubiquitination // inferred from sequence similarity	---	IPR001394 // Peptidase C19, ubiquitin carboxyl-terminal hydrolase family 2 // 2.6E-69
10850	152049_at	-2.52742	5.74886	-12.6139	7.63322e-14	3.31088e-12	21.4695	FBgn0004181	CG2668	Peb	Protein ejaculatory bulb	38009	5198 // structural molecule activity // inferred from expression pattern /// 5515 // protein binding // inferred from physical interaction	42628 // mating plug formation // traceable author statement /// 45297 // post-mating behavior // inferred from expression pattern /// 7610 // behavior // inferred from electronic annotation	5576 // extracellular region // inferred from direct assay	---
11660	152859_at	-0.594492	0.564063	-12.6115	7.67087e-14	3.31694e-12	21.4646	FBgn0036939	CG7365	CG7365	CG7365	40200	4620 // phospholipase activity // inferred from sequence or structural similarity /// 16298 // lipase activity // inferred from electronic annotation /// 16788 // hydrolase activity, acting on ester bonds // inferred from electronic annotation /// 4620 // phospholipase activity // inferred from sequence similarity	6629 // lipid metabolism // inferred from electronic annotation	---	IPR001087 // Lipolytic enzyme, G-D-S-L // 6.5E-9
4975	146174_s_at	-1.766	3.97832	-12.6032	7.8055e-14	3.35445e-12	21.447	FBgn0043825 /// FBgn0051872	CG31872 /// CG18284	CG18284 /// CG31872	CG18284 /// CG31872	34458 /// 34460	4806 // triacylglycerol lipase activity // inferred from sequence or structural similarity /// 16298 // lipase activity // inferred from electronic annotation /// 16298 // lipase activity // inferred from sequence or structural similarity /// 16787 // hydrolase activity // inferred from electronic annotation /// 3824 // catalytic activity // inferred from electronic annotation /// 16789 // carbox…	6629 // lipid metabolism // inferred from electronic annotation /// 6629 // lipid metabolism // inferred from sequence or structural similarity /// 16042 // lipid catabolism // inferred from electronic annotation /// 6629 // lipid metabolism // inferred from sequence similarity	---	IPR006693 // Ab-hydrolase associated lipase region // 1.3E-24 /// IPR006693 // Ab-hydrolase associated lipase region // 1.3E-23
210	141409_at	-1.38402	1.36587	-12.5928	7.97848e-14	3.40788e-12	21.4249	FBgn0039154	CG6164	CG6164	CG6164	42864	5515 // protein binding // inferred from physical interaction	---	---	IPR003172 // E1 protein and Def2/Der2 allergen // 2.3E-29
2425	143624_at	-1.86703	3.06914	-12.5853	8.10433e-14	3.44066e-12	21.4091	FBgn0010425	CG18681	Try	Trypsin	49080	4263 // chymotrypsin activity // inferred from electronic annotation /// 4295 // trypsin activity // non-traceable author statement /// 4252 // serine-type endopeptidase activity // inferred from electronic annotation	6508 // proteolysis // non-traceable author statement /// 6508 // proteolysis // inferred from electronic annotation	5576 // extracellular region // non-traceable author statement	IPR001254 // Peptidase S1, chymotrypsin // 5.6E-86
2474	143673_at	-1.32804	4.04552	-12.5564	8.61033e-14	3.62254e-12	21.348	FBgn0011670	CG4986	Mst57Dc	Male-specific RNA 57Dc	43121	---	18991 // oviposition // non-traceable author statement /// 45297 // post-mating behavior // non-traceable author statement /// 7610 // behavior // inferred from electronic annotation	5576 // extracellular region // non-traceable author statement	---
2458	143657_at	-0.947066	3.2107	-12.5515	8.70043e-14	3.64949e-12	21.3375	FBgn0011336	CG7748	OstStt3	Oligosaccharyl transferase 3	43005	4576 // oligosaccharyl transferase activity // inferred from sequence or structural similarity /// 4576 // oligosaccharyl transferase activity // inferred from electronic annotation /// 4576 // oligosaccharyl transferase activity // inferred from sequence similarity	6486 // protein amino acid glycosylation // inferred from electronic annotation	8250 // oligosaccharyl transferase complex // inferred from sequence or structural similarity /// 16020 // membrane // inferred from electronic annotation /// 8250 // oligosaccharyl transferase complex // inferred from sequence similarity	IPR003674 // Oligosaccharyl transferase, STT3 subunit // 1.0E-126
13232	154431_at	-1.21151	3.21841	-12.5455	8.81045e-14	3.68461e-12	21.3249	FBgn0016122	CG10593	Acer	Angiotensin-converting enzyme-related	34189	4246 // peptidyl-dipeptidase A activity // inferred from sequence or structural similarity /// 4246 // peptidyl-dipeptidase A activity // non-traceable author statement /// 4246 // peptidyl-dipeptidase A activity // traceable author statement /// 8270 // zinc ion binding // inferred from electronic annotation /// 5515 // protein binding // inferred from physical interaction /// 4180 // carboxypep…	6508 // proteolysis // inferred from electronic annotation /// 7507 // heart development // inferred from mutant phenotype /// 6508 // proteolysis // traceable author statement	16020 // membrane // inferred from electronic annotation /// 5576 // extracellular region // inferred from direct assay	IPR001548 // Peptidase M2, peptidyl-dipeptidase A // 1.0E-126
12382	153581_at	-0.679189	2.58448	-12.5439	8.84102e-14	3.68639e-12	21.3214	FBgn0022268	CG5183	KdelR	KDEL receptor	34427	4872 // receptor activity // inferred from electronic annotation /// 5046 // KDEL sequence binding // inferred from sequence or structural similarity /// 5046 // KDEL sequence binding // non-traceable author statement /// 46923 // ER retention sequence binding // inferred from electronic annotation /// 5046 // KDEL sequence binding // inferred from sequence similarity	6621 // protein retention in ER // non-traceable author statement /// 6887 // exocytosis // inferred from electronic annotation /// 6890 // retrograde vesicle-mediated transport, Golgi to ER // inferred from sequence or structural similarity /// 6890 // retrograde vesicle-mediated transport, Golgi to ER // non-traceable author statement /// 6891 // intra-Golgi vesicle-mediated transport // non-tr…	5783 // endoplasmic reticulum // non-traceable author statement /// 16021 // integral to membrane // non-traceable author statement /// 30140 // trans-Golgi network transport vesicle // inferred from sequence or structural similarity /// 30140 // trans-Golgi network transport vesicle // non-traceable author statement /// 5783 // endoplasmic reticulum // inferred from electronic annotation /// 160…	IPR000133 // ER lumen protein retaining receptor // 1.0E-126
10594	151793_at	-2.01396	4.72148	-12.5394	8.92496e-14	3.71035e-12	21.3118	FBgn0035665	CG6483	Jon65Aiii	Jonah 65Aiii	38683	4252 // serine-type endopeptidase activity // inferred from sequence or structural similarity /// 4263 // chymotrypsin activity // inferred from electronic annotation /// 4295 // trypsin activity // inferred from electronic annotation /// 42708 // elastase activity // non-traceable author statement /// 5515 // protein binding // inferred from physical interaction /// 4252 // serine-type endopepti…	6508 // proteolysis // non-traceable author statement /// 6508 // proteolysis // inferred from electronic annotation	---	IPR001254 // Peptidase S1, chymotrypsin // 2.2E-56
2746	143945_at	-1.26835	3.60495	-12.5358	8.99184e-14	3.72709e-12	21.3043	FBgn0020907	CG14904	Scp2	Sarcoplasmic calcium-binding protein 2	42015	3924 // GTPase activity // inferred from direct assay /// 3924 // GTPase activity // inferred from sequence or structural similarity /// 5509 // calcium ion binding // inferred from sequence or structural similarity /// 5509 // calcium ion binding // non-traceable author statement /// 5515 // protein binding // inferred from physical interaction /// 5509 // calcium ion binding // inferred from el…	---	16529 // sarcoplasmic reticulum // inferred from sequence or structural similarity /// 16529 // sarcoplasmic reticulum // inferred from sequence similarity	IPR002048 // Calcium-binding EF-hand // 0.038 /// IPR002048 // Calcium-binding EF-hand // 0.0011 /// IPR002048 // Calcium-binding EF-hand // 0.05
10339	151538_s_at	-2.49252	3.89074	-12.5127	9.44082e-14	3.8833e-12	21.2552	FBgn0016724	CG11064	RfaBp	Retinoid- and fatty-acid binding protein	43827	5198 // structural molecule activity // inferred from sequence or structural similarity /// 5319 // lipid transporter activity // inferred from electronic annotation /// 5501 // retinoid binding // non-traceable author statement /// 5504 // fatty acid binding // non-traceable author statement /// 8017 // microtubule binding // inferred from direct assay /// 19841 // retinol binding // inferred fr…	6810 // transport // traceable author statement /// 6869 // lipid transport // inferred from electronic annotation /// 7224 // smoothened signaling pathway // inferred from mutant phenotype /// 16055 // Wnt receptor signaling pathway // inferred from mutant phenotype /// 6810 // transport // inferred from electronic annotation /// 16055 // Wnt receptor signaling pathway // inferred from electroni…	5576 // extracellular region // non-traceable author statement	IPR009454 // Protein of unknown function DUF1081 // 3.0E-55 /// IPR001846 // von Willebrand factor, type D // 2.9E-29 /// IPR001747 // Lipid transport protein, N-terminal // 7.1E-119
12305	153504_at	-1.10422	1.46252	-12.5121	9.45187e-14	3.8833e-12	21.254	FBgn0053138	CG33138	CG33138	CG33138	326264	3844 // 1,4-alpha-glucan branching enzyme activity // inferred from sequence or structural similarity /// 4553 // hydrolase activity, hydrolyzing O-glycosyl compounds // inferred from electronic annotation /// 4556 // alpha-amylase activity // inferred from electronic annotation /// 3844 // 1,4-alpha-glucan branching enzyme activity // inferred from sequence similarity	5977 // glycogen metabolism // inferred from electronic annotation /// 5975 // carbohydrate metabolism // inferred from electronic annotation	---	IPR006047 // Alpha amylase, catalytic domain // 1.6E-11 /// IPR004193 // Glycoside hydrolase, family 13, N-terminal // 6.2E-34
6137	147336_at	-1.53318	2.84244	-12.506	9.57469e-14	3.91083e-12	21.2409	FBgn0034162	CG6426	CG6426	CG6426	36891	5509 // calcium ion binding // inferred from electronic annotation	6952 // defense response // inferred from electronic annotation /// 42742 // defense response to bacteria // inferred from electronic annotation	---	IPR008597 // Destabilase // 1.3E-72
11133	152332_at	-1.02813	3.16262	-12.5002	9.69256e-14	3.94747e-12	21.2286	FBgn0030251	CG2145	CG2145	CG2145	32027	8236 // serine-type peptidase activity // inferred from sequence or structural similarity /// 8236 // serine-type peptidase activity // inferred from sequence similarity	---	---	---
10410	151609_at	-1.36806	2.64814	-12.4765	1.01877e-13	4.13709e-12	21.1783	---	---	---	---	---	---	---	---	---
1772	142971_at	-1.13885	2.07051	-12.4697	1.03356e-13	4.18501e-12	21.1638	FBgn0003638	CG3019	su(w<up>a</up>)	suppressor of white-apricot	31054	3723 // RNA binding // inferred from electronic annotation	398 // nuclear mRNA splicing, via spliceosome // non-traceable author statement /// 398 // nuclear mRNA splicing, via spliceosome // inferred from electronic annotation /// 6350 // transcription // inferred from electronic annotation /// 6355 // regulation of transcription, DNA-dependent // inferred from electronic annotation /// 6396 // RNA processing // inferred from electronic annotation /// 6…	5634 // nucleus // non-traceable author statement /// 5681 // spliceosome complex // non-traceable author statement /// 5634 // nucleus // inferred from electronic annotation	IPR000061 // SWAP/Surp // 4.8E-22 /// IPR000061 // SWAP/Surp // 1.9E-20
5945	147144_at	-1.37505	1.43125	-12.4634	1.0473e-13	4.22845e-12	21.1505	FBgn0033826	CG4734	CG4734	CG4734	36477	---	---	---	---
10938	152137_at	-1.22316	1.6169	-12.4479	1.08223e-13	4.35691e-12	21.1174	FBgn0039754	CG9747	CG9747	CG9747	43591	4768 // stearoyl-CoA 9-desaturase activity // inferred from electronic annotation /// 5506 // iron ion binding // inferred from electronic annotation /// 17105 // acyl-CoA delta11-desaturase activity // inferred from sequence or structural similarity /// 5515 // protein binding // inferred from physical interaction /// 16491 // oxidoreductase activity // inferred from electronic annotation /// 17…	6631 // fatty acid metabolism // inferred from electronic annotation /// 6633 // fatty acid biosynthesis // inferred from electronic annotation /// 8610 // lipid biosynthesis // inferred from electronic annotation	5783 // endoplasmic reticulum // inferred from electronic annotation /// 16020 // membrane // inferred from electronic annotation /// 16021 // integral to membrane // inferred from electronic annotation	IPR005804 // Fatty acid desaturase // 4.9E-80
13063	154262_at	-1.06741	2.76583	-12.4442	1.09081e-13	4.37886e-12	21.1094	FBgn0004507	CG7254	GlyP	Glycogen phosphorylase	33386	4645 // phosphorylase activity // inferred from direct assay /// 8184 // glycogen phosphorylase activity // inferred from mutant phenotype /// 8184 // glycogen phosphorylase activity // inferred from sequence or structural similarity /// 8184 // glycogen phosphorylase activity // non-traceable author statement /// 4645 // phosphorylase activity // inferred from electronic annotation /// 16740 // …	5975 // carbohydrate metabolism // non-traceable author statement /// 5977 // glycogen metabolism // inferred from electronic annotation /// 5977 // glycogen metabolism // inferred from mutant phenotype /// 5975 // carbohydrate metabolism // inferred from electronic annotation	---	IPR000811 // Glycosyl transferase, family 35 // 1.0E-126
8572	149771_at	-0.775641	2.39396	-12.4394	1.10187e-13	4.41061e-12	21.0993	FBgn0038038	CG5167	CG5167	CG5167	41521	---	---	---	---
4570	145769_at	-1.2828	2.12213	-12.3833	1.24076e-13	4.92436e-12	20.9795	FBgn0031617	CG15635	CG15635	CG15635	33665	3677 // DNA binding // inferred from electronic annotation /// 8170 // N-methyltransferase activity // inferred from electronic annotation	6306 // DNA methylation // inferred from electronic annotation	---	---
1072	142271_at	-1.18397	2.56687	-12.3607	1.30175e-13	5.13732e-12	20.9311	FBgn0026314	CG6649	Ugt35b	UDP-glycosyltransferase 35b	41333	15020 // glucuronosyltransferase activity // inferred from sequence or structural similarity /// 15020 // glucuronosyltransferase activity // non-traceable author statement /// 16740 // transferase activity // inferred from electronic annotation /// 16757 // transferase activity, transferring glycosyl groups // inferred from electronic annotation /// 16758 // transferase activity, transferring he…	5976 // polysaccharide metabolism // inferred from electronic annotation /// 6952 // defense response // inferred from electronic annotation /// 8202 // steroid metabolism // inferred from electronic annotation /// 9636 // response to toxin // inferred from electronic annotation /// 8152 // metabolism // inferred from electronic annotation	---	IPR002213 // UDP-glucoronosyl/UDP-glucosyl transferase // 5.4E-93
13708	154907_at	-1.06902	2.43694	-12.3409	1.35768e-13	5.32805e-12	20.8886	FBgn0037070	CG11309	CG11309	CG11309	40356	5509 // calcium ion binding // inferred from electronic annotation /// 16787 // hydrolase activity // inferred from electronic annotation /// 3824 // catalytic activity // inferred from electronic annotation	---	---	IPR000073 // Alpha/beta hydrolase fold // 5.1E-13 /// IPR000073 // Alpha/beta hydrolase fold // 5.1E-13
10814	152013_at	-1.26605	2.63906	-12.3388	1.36363e-13	5.33643e-12	20.8842	FBgn0027586	CG5867	CG5867	CG5867	34728	---	---	---	IPR004272 // Odorant binding protein // 2.2E-52
7605	148804_at	-0.908107	2.64082	-12.3307	1.38757e-13	5.41499e-12	20.8667	FBgn0036501	CG7272	CG7272	CG7272	39670	---	---	16020 // membrane // inferred from electronic annotation	IPR004316 // MtN3 and saliva related transmembrane protein // 2.5E-25 /// IPR004316 // MtN3 and saliva related transmembrane protein // 1.3E-33
12591	153790_at	-1.3084	2.49595	-12.3161	1.43107e-13	5.56923e-12	20.8355	FBgn0028325	CG7010	l(1)G0334	lethal (1) G0334	31406	4739 // pyruvate dehydrogenase (acetyl-transferring) activity // inferred from sequence or structural similarity /// 16624 // oxidoreductase activity, acting on the aldehyde or oxo group of donors, disulfide as acceptor // inferred from electronic annotation /// 4739 // pyruvate dehydrogenase (acetyl-transferring) activity // inferred from sequence similarity	6090 // pyruvate metabolism // inferred from sequence or structural similarity /// 6099 // tricarboxylic acid cycle // inferred from electronic annotation /// 8152 // metabolism // inferred from electronic annotation /// 6090 // pyruvate metabolism // inferred from sequence similarity	45254 // pyruvate dehydrogenase complex // inferred from sequence or structural similarity /// 45254 // pyruvate dehydrogenase complex // inferred from sequence similarity	IPR001017 // Dehydrogenase, E1 component // 1.0E-126 /// IPR001017 // Dehydrogenase, E1 component // 1.0E-126 /// IPR001017 // Dehydrogenase, E1 component // 1.0E-126
10807	152006_at	-2.11919	3.71831	-12.2793	1.54793e-13	5.99076e-12	20.7563	FBgn0035670	CG10472	CG10472	CG10472	38688	4252 // serine-type endopeptidase activity // inferred from sequence or structural similarity /// 4263 // chymotrypsin activity // non-traceable author statement /// 4295 // trypsin activity // inferred from electronic annotation /// 5515 // protein binding // inferred from physical interaction /// 4252 // serine-type endopeptidase activity // inferred from electronic annotation /// 8233 // pepti…	6508 // proteolysis // non-traceable author statement /// 6508 // proteolysis // inferred from electronic annotation	---	IPR001254 // Peptidase S1, chymotrypsin // 2.5E-70
2847	144046_at	-1.09198	1.34319	-12.2779	1.55244e-13	5.99165e-12	20.7534	FBgn0024995	CG2680	CG2680	CG2680	31257	3869 // 4-nitrophenylphosphatase activity // inferred from sequence or structural similarity /// 3824 // catalytic activity // inferred from electronic annotation /// 16787 // hydrolase activity // inferred from electronic annotation /// 3869 // 4-nitrophenylphosphatase activity // inferred from sequence similarity	8152 // metabolism // inferred from electronic annotation	---	IPR005834 // Haloacid dehalogenase-like hydrolase // 1.3E-13
277	141476_at	-0.691112	1.59954	-12.2513	1.6431e-13	6.30682e-12	20.6961	FBgn0033905	CG18324	CG18324	CG18324	36568	5386 // carrier activity // inferred from sequence or structural similarity /// 5488 // binding // inferred from electronic annotation /// 5215 // transporter activity // inferred from electronic annotation /// 5386 // carrier activity // inferred from sequence similarity	6810 // transport // inferred from electronic annotation	5740 // mitochondrial envelope // inferred from sequence or structural similarity /// 5743 // mitochondrial inner membrane // inferred from electronic annotation /// 16020 // membrane // inferred from electronic annotation /// 16021 // integral to membrane // inferred from electronic annotation /// 5740 // mitochondrial envelope // inferred from sequence similarity	IPR001993 // Mitochondrial substrate carrier // 1.1E-15 /// IPR001993 // Mitochondrial substrate carrier // 2.9E-13 /// IPR001993 // Mitochondrial substrate carrier // 1.5E-26 /// IPR001993 // Mitochondrial substrate carrier // 2.7E-10 /// IPR001993 // Mitochondrial substrate carrier // 1.5E-26
328	141527_at	-1.08577	2.90779	-12.2487	1.65242e-13	6.32526e-12	20.6904	FBgn0023479	CG4821	Tequila	Tequila	39048	4252 // serine-type endopeptidase activity // inferred from sequence or structural similarity /// 4252 // serine-type endopeptidase activity // non-traceable author statement /// 4263 // chymotrypsin activity // inferred from electronic annotation /// 4295 // trypsin activity // non-traceable author statement /// 5044 // scavenger receptor activity // inferred from electronic annotation /// 5524 …	6030 // chitin metabolism // inferred from electronic annotation /// 6508 // proteolysis // non-traceable author statement /// 15986 // ATP synthesis coupled proton transport // inferred from electronic annotation /// 6508 // proteolysis // inferred from electronic annotation	5576 // extracellular region // inferred from electronic annotation /// 16020 // membrane // inferred from electronic annotation /// 16469 // proton-transporting two-sector ATPase complex // inferred from electronic annotation /// 16021 // integral to membrane // inferred from electronic annotation	IPR002172 // Low density lipoprotein-receptor, class A // 2.6E-6 /// IPR002172 // Low density lipoprotein-receptor, class A // 4.5E-12 /// IPR001190 // Speract/scavenger receptor // 2.8E-23 /// IPR001190 // Speract/scavenger receptor // 5.9E-28 /// IPR001254 // Peptidase S1, chymotrypsin // 1.4E-82 /// IPR002557 // Chitin binding Peritrophin-A // 1.8E-19 /// IPR002557 // Chitin binding Peritrophi…
8643	149842_at	-0.89635	1.48781	-12.2381	1.69023e-13	6.4348e-12	20.6676	FBgn0041711	CG9792	yellow-e	yellow-e	41653	---	---	---	IPR003534 // Major royal jelly protein // 5.3E-126
13414	154613_at	-1.13632	2.7955	-12.2163	1.77087e-13	6.72357e-12	20.6205	FBgn0031360	CG31937	CG31937	CG31937	326177	16616 // oxidoreductase activity, acting on the CH-OH group of donors, NAD or NADP as acceptor // inferred from sequence or structural similarity /// 16491 // oxidoreductase activity // inferred from electronic annotation /// 16616 // oxidoreductase activity, acting on the CH-OH group of donors, NAD or NADP as acceptor // inferred from sequence similarity	8152 // metabolism // inferred from electronic annotation	---	IPR002198 // Short-chain dehydrogenase/reductase SDR // 2.6E-38
3669	144868_at	-0.693441	2.09821	-12.2134	1.78178e-13	6.73419e-12	20.6144	FBgn0030292	CG11752	CG11752	CG11752	32076	---	---	---	---
191	141390_at	-1.47084	3.61418	-12.201	1.82966e-13	6.87226e-12	20.5876	FBgn0010609	CG8732	l(2)44DEa	lethal (2) 44DEa	46068	3987 // acetate-CoA ligase activity // inferred from sequence or structural similarity /// 3824 // catalytic activity // inferred from electronic annotation /// 8121 // ubiquinol-cytochrome-c reductase activity // inferred from electronic annotation /// 3987 // acetate-CoA ligase activity // inferred from sequence similarity	6631 // fatty acid metabolism // inferred from electronic annotation /// 8152 // metabolism // inferred from electronic annotation /// 6122 // mitochondrial electron transport, ubiquinol to cytochrome c // inferred from electronic annotation	---	IPR000873 // AMP-dependent synthetase and ligase // 1.3E-87 /// IPR000873 // AMP-dependent synthetase and ligase // 1.3E-87 /// IPR000873 // AMP-dependent synthetase and ligase // 1.3E-87
7496	148695_at	-1.27241	1.89169	-12.1982	1.84091e-13	6.89601e-12	20.5814	FBgn0036342	CG11279	CG11279	CG11279	39486	---	---	---	---
5536	146735_at	-0.94862	1.3527	-12.1848	1.89449e-13	7.07783e-12	20.5525	FBgn0033165	CG11113	CG11113	CG11113	35659	---	---	---	---
11279	152478_at	-2.00286	4.10329	-12.1513	2.03542e-13	7.56399e-12	20.48	FBgn0035087	CG2765	CG2765	CG2765	37994	---	---	---	---
5761	146960_at	-1.0079	2.1015	-12.1378	2.09548e-13	7.73265e-12	20.4507	FBgn0033543	CG12338	CG12338	CG12338	36128	3884 // D-amino-acid oxidase activity // inferred from electronic annotation /// 8445 // D-aspartate oxidase activity // inferred from sequence or structural similarity /// 16491 // oxidoreductase activity // inferred from electronic annotation /// 8445 // D-aspartate oxidase activity // inferred from sequence similarity	6118 // electron transport // inferred from electronic annotation /// 6520 // amino acid metabolism // inferred from electronic annotation	---	IPR006076 // FAD dependent oxidoreductase // 7.4E-45
6850	148049_at	-1.11163	1.00588	-12.1374	2.09737e-13	7.73265e-12	20.4498	FBgn0035344	CG16761	Cyp4d20	Cyp4d20	38311	4497 // monooxygenase activity // inferred from electronic annotation /// 16491 // oxidoreductase activity // inferred from electronic annotation /// 5506 // iron ion binding // inferred from electronic annotation /// 20037 // heme binding // inferred from electronic annotation /// 46872 // metal ion binding // inferred from electronic annotation	6118 // electron transport // inferred from electronic annotation	5792 // microsome // non-traceable author statement /// 16020 // membrane // non-traceable author statement /// 16020 // membrane // inferred from electronic annotation	IPR001128 // Cytochrome P450 // 3.9E-114
1111	142310_at	-0.952751	3.11928	-12.1095	2.22682e-13	8.1884e-12	20.3894	FBgn0015575	CG1112	Est7	Esterase-7	40901	4091 // carboxylesterase activity // inferred from sequence or structural similarity /// 4091 // carboxylesterase activity // non-traceable author statement /// 3824 // catalytic activity // inferred from electronic annotation /// 4759 // serine esterase activity // inferred from electronic annotation /// 4091 // carboxylesterase activity // inferred from sequence similarity	---	---	IPR002018 // Carboxylesterase, type B // 1.0E-126 /// IPR002018 // Carboxylesterase, type B // 3.5E-63 /// IPR002018 // Carboxylesterase, type B // 2.7E-45
8808	150007_at	-0.81975	0.711113	-12.0978	2.28371e-13	8.37558e-12	20.3639	FBgn0038419	CG14879	CG14879	CG14879	41982	5529 // sugar binding // inferred from electronic annotation	---	---	---
171	141370_at	-0.946136	2.8766	-12.0549	2.50515e-13	9.16376e-12	20.2705	FBgn0027945	CG7758	ppl	pumpless	40349	16787 // hydrolase activity // inferred from electronic annotation /// 31405 // lipoic acid binding // inferred from electronic annotation	6546 // glycine catabolism // inferred from sequence or structural similarity /// 6546 // glycine catabolism // inferred from electronic annotation /// 6546 // glycine catabolism // inferred from sequence similarity	5739 // mitochondrion // inferred from sequence or structural similarity /// 5960 // glycine cleavage complex // inferred from sequence or structural similarity /// 5739 // mitochondrion // inferred from electronic annotation /// 5960 // glycine cleavage complex // inferred from electronic annotation /// 5739 // mitochondrion // inferred from sequence similarity /// 5960 // glycine cleavage compl…	IPR002930 // Glycine cleavage H-protein // 4.2E-62
2267	143466_f_at	-2.70935	3.09548	-12.0376	2.6007e-13	9.4885e-12	20.2327	FBgn0004427 /// FBgn0011201	CG9118	LysD /// LysA	Lysozyme D /// Lysozyme A	38127	3796 // lysozyme activity // inferred from direct assay /// 3796 // lysozyme activity // inferred from sequence or structural similarity /// 3796 // lysozyme activity // non-traceable author statement /// 4568 // chitinase activity // inferred from direct assay /// 3796 // lysozyme activity // inferred from electronic annotation /// 3824 // catalytic activity // inferred from electronic annotatio…	6960 // antimicrobial humoral response (sensu Protostomia) // non-traceable author statement /// 5975 // carbohydrate metabolism // inferred from electronic annotation /// 16998 // cell wall catabolism // inferred from electronic annotation /// 19835 // cytolysis // inferred from electronic annotation /// 42742 // defense response to bacteria // inferred from electronic annotation	5576 // extracellular region // inferred from electronic annotation	IPR001916 // Glycoside hydrolase, family 22 // 1.3E-67 /// IPR001916 // Glycoside hydrolase, family 22 // 3.2E-65
3188	144387_at	-0.867138	0.172557	-12.0162	2.72332e-13	9.80816e-12	20.1862	FBgn0029588	CG14798	CG14798	CG14798	31126	---	---	---	---
12262	153461_at	-0.894153	1.75773	-12.0057	2.78608e-13	1.00057e-11	20.1632	FBgn0050503	CG30503	CG30503	CG30503	246656	5515 // protein binding // inferred from physical interaction /// 4623 // phospholipase A2 activity // inferred from electronic annotation /// 5509 // calcium ion binding // inferred from electronic annotation /// 166 // nucleotide binding // inferred from electronic annotation /// 5525 // GTP binding // inferred from electronic annotation	6644 // phospholipid metabolism // inferred from electronic annotation /// 7264 // small GTPase mediated signal transduction // inferred from electronic annotation	5576 // extracellular region // inferred from electronic annotation /// 16020 // membrane // inferred from electronic annotation	IPR008774 // A2 Phospholipase // 1.7E-67
2199	143398_at	-1.24458	6.05344	-12.0018	2.80951e-13	1.00156e-11	20.1548	FBgn0003942	CG5271	RpS27A	Ribosomal protein S27A	34420	3676 // nucleic acid binding // inferred from electronic annotation /// 3735 // structural constituent of ribosome // inferred from sequence or structural similarity /// 3735 // structural constituent of ribosome // non-traceable author statement /// 5515 // protein binding // inferred from sequence or structural similarity /// 5515 // protein binding // inferred from physical interaction /// 373…	6325 // establishment and/or maintenance of chromatin architecture // non-traceable author statement /// 6355 // regulation of transcription, DNA-dependent // non-traceable author statement /// 6412 // protein biosynthesis // inferred from sequence or structural similarity /// 6464 // protein modification // inferred from sequence or structural similarity /// 6510 // ATP-dependent proteolysis // …	5634 // nucleus // non-traceable author statement /// 5737 // cytoplasm // non-traceable author statement /// 5840 // ribosome // non-traceable author statement /// 5843 // cytosolic small ribosomal subunit (sensu Eukaryota) // inferred from sequence or structural similarity /// 5622 // intracellular // inferred from electronic annotation /// 5840 // ribosome // inferred from electronic annotatio…	IPR002906 // Ribosomal protein S27a // 1.8E-31 /// IPR000626 // Ubiquitin // 3.8E-43
997	142196_at	-0.92144	2.52045	-11.9854	2.91121e-13	1.03422e-11	20.1189	FBgn0010053	CG15101	Jheh1	Juvenile hormone epoxide hydrolase 1	251984	4301 // epoxide hydrolase activity // inferred from sequence or structural similarity /// 8096 // juvenile hormone epoxide hydrolase activity // inferred from direct assay /// 8096 // juvenile hormone epoxide hydrolase activity // non-traceable author statement /// 5515 // protein binding // inferred from physical interaction /// 3824 // catalytic activity // inferred from electronic annotation /…	6719 // juvenile hormone catabolism // inferred from direct assay /// 6719 // juvenile hormone catabolism // non-traceable author statement /// 6952 // defense response // inferred from electronic annotation /// 9636 // response to toxin // inferred from electronic annotation /// 19439 // aromatic compound catabolism // inferred from electronic annotation	5783 // endoplasmic reticulum // inferred from electronic annotation /// 5792 // microsome // inferred from electronic annotation /// 16020 // membrane // inferred from electronic annotation /// 16021 // integral to membrane // inferred from electronic annotation	IPR010497 // Epoxide hydrolase, N-terminal // 1.2E-68
11295	152494_at	-2.69268	3.67771	-11.9847	2.91589e-13	1.03422e-11	20.1173	FBgn0033065	CG8345	Cyp6w1	Cyp6w1	35543	4497 // monooxygenase activity // inferred from electronic annotation /// 16491 // oxidoreductase activity // inferred from electronic annotation /// 5506 // iron ion binding // inferred from electronic annotation /// 20037 // heme binding // inferred from electronic annotation /// 46872 // metal ion binding // inferred from electronic annotation	6118 // electron transport // inferred from electronic annotation	5792 // microsome // non-traceable author statement /// 16020 // membrane // non-traceable author statement /// 5783 // endoplasmic reticulum // inferred from electronic annotation /// 5792 // microsome // inferred from electronic annotation /// 16020 // membrane // inferred from electronic annotation	IPR001128 // Cytochrome P450 // 1.7E-89
43	141242_at	-1.25311	1.27341	-11.9719	2.99761e-13	1.05693e-11	20.0894	FBgn0034388 /// FBgn0054020	CG15092	CG15092 /// CG34020	CG15092 /// CG34020	37164 /// 3885593	5515 // protein binding // inferred from physical interaction	---	---	---
5525	146724_at	-1.34032	3.60887	-11.9718	2.99823e-13	1.05693e-11	20.0891	FBgn0024293	CG1865	Spn43Ab	Serine protease inhibitor 43Ab	45040	4867 // serine-type endopeptidase inhibitor activity // inferred from sequence or structural similarity /// 4867 // serine-type endopeptidase inhibitor activity // inferred from electronic annotation /// 4867 // serine-type endopeptidase inhibitor activity // inferred from sequence similarity	6508 // proteolysis // inferred from electronic annotation	---	IPR000215 // Serpin // 5.8E-62
11357	152556_at	-1.17381	1.89727	-11.9524	3.1276e-13	1.09819e-11	20.0465	FBgn0019929	CG2045	Ser7	Ser7	31917	4197 // cysteine-type endopeptidase activity // inferred from electronic annotation /// 4252 // serine-type endopeptidase activity // inferred from sequence or structural similarity /// 4263 // chymotrypsin activity // inferred from electronic annotation /// 4295 // trypsin activity // non-traceable author statement /// 8236 // serine-type peptidase activity // inferred from sequence or structura…	6508 // proteolysis // non-traceable author statement /// 6508 // proteolysis // inferred from electronic annotation	---	IPR001254 // Peptidase S1, chymotrypsin // 6.6E-55
3465	144664_at	-1.58278	2.9864	-11.9507	3.13901e-13	1.09944e-11	20.0428	FBgn0029975	CG1444	CG1444	CG1444	31703	16229 // steroid dehydrogenase activity // inferred from sequence or structural similarity /// 16491 // oxidoreductase activity // inferred from electronic annotation /// 16229 // steroid dehydrogenase activity // inferred from sequence similarity	8202 // steroid metabolism // inferred from electronic annotation /// 8152 // metabolism // inferred from electronic annotation	---	IPR002198 // Short-chain dehydrogenase/reductase SDR // 3.6E-46
3711	144910_at	-0.945127	0.373428	-11.9452	3.17685e-13	1.10888e-11	20.0307	FBgn0030361	CG1492	CG1492	CG1492	32164	3840 // gamma-glutamyltransferase activity // inferred from sequence or structural similarity /// 8233 // peptidase activity // inferred from electronic annotation /// 8415 // acyltransferase activity // inferred from electronic annotation /// 3840 // gamma-glutamyltransferase activity // inferred from electronic annotation /// 3840 // gamma-glutamyltransferase activity // inferred from sequence …	6464 // protein modification // inferred from electronic annotation /// 6508 // proteolysis // inferred from electronic annotation /// 6520 // amino acid metabolism // inferred from electronic annotation /// 6629 // lipid metabolism // inferred from electronic annotation	---	IPR000101 // Peptidase T3, gamma-glutamyltranspeptidase // 1.0E-126
10483	151682_at	-1.19763	3.41513	-11.9445	3.1818e-13	1.10888e-11	20.0292	FBgn0000251	CG1759	cad	caudal	35341	3677 // DNA binding // inferred from electronic annotation /// 3700 // transcription factor activity // inferred from electronic annotation /// 3702 // RNA polymerase II transcription factor activity // non-traceable author statement /// 3704 // specific RNA polymerase II transcription factor activity // non-traceable author statement /// 16563 // transcriptional activator activity // inferred fr…	6357 // regulation of transcription from RNA polymerase II promoter // inferred from electronic annotation /// 7377 // germ-band extension // inferred from mutant phenotype /// 7379 // segment specification // inferred from mutant phenotype /// 7442 // hindgut morphogenesis // inferred from mutant phenotype /// 7442 // hindgut morphogenesis // traceable author statement /// 7443 // Malpighian tub…	5634 // nucleus // inferred from direct assay /// 5634 // nucleus // non-traceable author statement /// 5737 // cytoplasm // inferred from direct assay /// 5634 // nucleus // inferred from electronic annotation	IPR001356 // Homeobox // 2.8E-23
273	141472_at	-1.90922	2.15635	-11.9198	3.35697e-13	1.16462e-11	19.9751	FBgn0001114	CG9280	Glt	Glutactin	34193	3824 // catalytic activity // inferred from electronic annotation /// 5509 // calcium ion binding // non-traceable author statement /// 5509 // calcium ion binding // inferred from electronic annotation	---	5604 // basement membrane // inferred from direct assay /// 5604 // basement membrane // non-traceable author statement	IPR002018 // Carboxylesterase, type B // 1.0E-126
4968	146167_at	-0.83464	1.42026	-11.9196	3.35837e-13	1.16462e-11	19.9747	FBgn0032266	CG18302	CG18302	CG18302	34452	16298 // lipase activity // inferred from electronic annotation /// 16787 // hydrolase activity // inferred from electronic annotation	6629 // lipid metabolism // inferred from electronic annotation	---	IPR006693 // Ab-hydrolase associated lipase region // 4.0E-22
12165	153364_at	-1.04585	3.13757	-11.9105	3.42576e-13	1.18506e-11	19.9546	FBgn0031845	CG9232	CG9232	CG9232	33935	8108 // UDP-glucose:hexose-1-phosphate uridylyltransferase activity // inferred from sequence or structural similarity /// 8108 // UDP-glucose:hexose-1-phosphate uridylyltransferase activity // non-traceable author statement /// 5515 // protein binding // inferred from physical interaction /// 5506 // iron ion binding // inferred from electronic annotation /// 8108 // UDP-glucose:hexose-1-phospha…	6012 // galactose metabolism // non-traceable author statement /// 5975 // carbohydrate metabolism // inferred from electronic annotation /// 6012 // galactose metabolism // inferred from electronic annotation	---	IPR005850 // Galactose-1-phosphate uridyl transferase, C-terminal // 2.5E-72 /// IPR005849 // Galactose-1-phosphate uridyl transferase, N-terminal // 2.0E-88
10456	151655_at	-0.945257	3.02027	-11.9048	3.46788e-13	1.19667e-11	19.9423	FBgn0034087	CG8443	CG8443	CG8443	36793	3743 // translation initiation factor activity // inferred from sequence or structural similarity /// 5488 // binding // inferred from electronic annotation /// 3743 // translation initiation factor activity // inferred from sequence similarity	6413 // translational initiation // inferred from sequence or structural similarity /// 6445 // regulation of translation // inferred from electronic annotation /// 6413 // translational initiation // inferred from sequence similarity	5852 // eukaryotic translation initiation factor 3 complex // inferred from sequence or structural similarity /// 5852 // eukaryotic translation initiation factor 3 complex // inferred from sequence similarity	---
13622	154821_at	-1.76917	0.229926	-11.8959	3.53575e-13	1.20819e-11	19.9227	FBgn0043791	CG8147	CG8147	CG8147	41135	4035 // alkaline phosphatase activity // inferred from sequence or structural similarity /// 19204 // nucleotide phosphatase activity // inferred from electronic annotation /// 287 // magnesium ion binding // inferred from electronic annotation /// 8270 // zinc ion binding // inferred from electronic annotation /// 16787 // hydrolase activity // inferred from electronic annotation /// 4035 // alk…	1501 // skeletal development // inferred from electronic annotation /// 7498 // mesoderm development // inferred from electronic annotation /// 8152 // metabolism // inferred from electronic annotation	---	IPR001952 // Alkaline phosphatase // 1.6E-99
11586	152785_at	-0.790556	1.11645	-11.8902	3.58001e-13	1.22034e-11	19.9101	FBgn0034500	CG11200	CG11200	CG11200	37301	4090 // carbonyl reductase (NADPH) activity // inferred from sequence or structural similarity /// 5515 // protein binding // inferred from physical interaction /// 16491 // oxidoreductase activity // inferred from electronic annotation /// 4090 // carbonyl reductase (NADPH) activity // inferred from sequence similarity	8152 // metabolism // inferred from electronic annotation	---	IPR002198 // Short-chain dehydrogenase/reductase SDR // 1.4E-36
11620	152819_at	-1.13925	1.31197	-11.8861	3.61242e-13	1.22625e-11	19.901	FBgn0038733	CG11407	CG11407	CG11407	42354	5324 // long-chain fatty acid transporter activity // inferred from sequence or structural similarity /// 16874 // ligase activity // inferred from electronic annotation /// 5515 // protein binding // inferred from physical interaction /// 3824 // catalytic activity // inferred from electronic annotation /// 5324 // long-chain fatty acid transporter activity // inferred from sequence similarity	8152 // metabolism // inferred from electronic annotation	---	IPR000873 // AMP-dependent synthetase and ligase // 9.1E-88
11899	153098_at	-1.57761	3.04911	-11.8858	3.61484e-13	1.22625e-11	19.9004	FBgn0039102	CG16705	CG16705	CG16705	42791	4263 // chymotrypsin activity // inferred from electronic annotation /// 4295 // trypsin activity // non-traceable author statement /// 8439 // monophenol monooxygenase activator activity // inferred from sequence or structural similarity /// 4252 // serine-type endopeptidase activity // inferred from electronic annotation /// 8233 // peptidase activity // inferred from electronic annotation /// …	6508 // proteolysis // non-traceable author statement /// 6521 // regulation of amino acid metabolism // inferred from electronic annotation /// 8652 // amino acid biosynthesis // inferred from electronic annotation /// 6508 // proteolysis // inferred from electronic annotation	---	IPR001254 // Peptidase S1, chymotrypsin // 8.0E-69
5420	146619_i_at	-1.30509	2.99798	-11.8588	3.8343e-13	1.29442e-11	19.8409	FBgn0025814	CG1742	Mgstl	Microsomal glutathione S-transferase-like	44110	4364 // glutathione transferase activity // inferred from sequence or structural similarity /// 16740 // transferase activity // inferred from electronic annotation /// 4364 // glutathione transferase activity // inferred from sequence similarity	6464 // protein modification // inferred from electronic annotation /// 6952 // defense response // inferred from electronic annotation /// 9636 // response to toxin // inferred from electronic annotation	5741 // mitochondrial outer membrane // inferred from sequence or structural similarity /// 5792 // microsome // inferred from sequence or structural similarity /// 5741 // mitochondrial outer membrane // inferred from sequence similarity /// 5792 // microsome // inferred from sequence similarity	IPR001129 // Membrane-associated proteins in eicosanoid and glutathione metabolism (MAPEG) // 1.3E-66
6856	148055_at	-1.27868	2.94057	-11.855	3.86592e-13	1.30196e-11	19.8326	FBgn0035356	CG16986	CG16986	CG16986	38325	3824 // catalytic activity // inferred from electronic annotation	---	---	IPR006683 // Thioesterase superfamily // 2.5E-17
157	141356_at	-0.76104	3.02179	-11.8388	4.00521e-13	1.34564e-11	19.7969	FBgn0036762	CG7430	CG7430	CG7430	39988	4148 // dihydrolipoyl dehydrogenase activity // inferred from sequence or structural similarity /// 15036 // disulfide oxidoreductase activity // inferred from electronic annotation /// 46872 // metal ion binding // inferred from electronic annotation /// 4148 // dihydrolipoyl dehydrogenase activity // inferred from electronic annotation /// 16491 // oxidoreductase activity // inferred from elect…	6096 // glycolysis // inferred from electronic annotation /// 6099 // tricarboxylic acid cycle // inferred from sequence or structural similarity /// 6118 // electron transport // inferred from electronic annotation /// 6546 // glycine catabolism // inferred from sequence or structural similarity /// 6748 // lipoamide metabolism // inferred from sequence or structural similarity /// 6099 // trica…	5947 // alpha-ketoglutarate dehydrogenase complex (sensu Eukaryota) // inferred from sequence or structural similarity /// 5960 // glycine cleavage complex // inferred from sequence or structural similarity /// 5737 // cytoplasm // inferred from electronic annotation /// 5947 // alpha-ketoglutarate dehydrogenase complex (sensu Eukaryota) // inferred from sequence similarity /// 5960 // glycine cl…	IPR004099 // Pyridine nucleotide-disulphide oxidoreductase dimerisation domain // 1.2E-64 /// IPR001327 // FAD-dependent pyridine nucleotide-disulphide oxidoreductase // 5.1E-103
11708	152907_at	-1.39954	2.26628	-11.8146	4.2223e-13	1.40844e-11	19.7436	FBgn0004364	CG8896	18w	18 wheeler	37277	4888 // transmembrane receptor activity // inferred from sequence or structural similarity /// 4888 // transmembrane receptor activity // inferred from electronic annotation /// 4888 // transmembrane receptor activity // inferred from sequence similarity	6952 // defense response // traceable author statement /// 6955 // immune response // inferred from expression pattern /// 6961 // antibacterial humoral response (sensu Protostomia) // inferred from mutant phenotype /// 6961 // antibacterial humoral response (sensu Protostomia) // non-traceable author statement /// 6961 // antibacterial humoral response (sensu Protostomia) // traceable author sta…	5624 // membrane fraction // inferred from direct assay /// 5737 // cytoplasm // inferred from direct assay /// 5886 // plasma membrane // inferred from direct assay /// 5886 // plasma membrane // inferred from sequence or structural similarity /// 16021 // integral to membrane // inferred from sequence or structural similarity /// 16020 // membrane // inferred from electronic annotation /// 5886…	IPR001611 // Leucine-rich repeat // 0.14 /// IPR001611 // Leucine-rich repeat // 0.1 /// IPR001611 // Leucine-rich repeat // 0.091 /// IPR001611 // Leucine-rich repeat // 2.0E-4 /// IPR001611 // Leucine-rich repeat // 3.3E-5 /// IPR001611 // Leucine-rich repeat // 0.023 /// IPR001611 // Leucine-rich repeat // 0.0037 /// IPR001611 // Leucine-rich repeat // 0.019 /// IPR001611 // Leucine-rich repea…
5356	146555_at	-1.15122	2.73881	-11.7972	4.38604e-13	1.45612e-11	19.7052	FBgn0028986	CG9334	Spn3	Serine protease inhibitor 3	49806	4867 // serine-type endopeptidase inhibitor activity // inferred from sequence or structural similarity /// 4867 // serine-type endopeptidase inhibitor activity // non-traceable author statement /// 4867 // serine-type endopeptidase inhibitor activity // inferred from electronic annotation /// 8233 // peptidase activity // inferred from electronic annotation /// 4867 // serine-type endopeptidase …	6508 // proteolysis // inferred from electronic annotation /// 45861 // negative regulation of proteolysis // inferred from sequence or structural similarity /// 45861 // negative regulation of proteolysis // inferred from sequence similarity	---	IPR000215 // Serpin // 1.4E-106
11637	152836_at	-1.30301	2.25021	-11.798	4.37873e-13	1.45612e-11	19.7068	FBgn0025595	CG11325	GRHR	Gonadotropin-releasing hormone receptor	33942	1653 // peptide receptor activity // inferred from direct assay /// 4930 // G-protein coupled receptor activity // inferred from sequence or structural similarity /// 4968 // gonadotropin-releasing hormone receptor activity // inferred from sequence or structural similarity /// 8188 // neuropeptide receptor activity // inferred from sequence or structural similarity /// 8188 // neuropeptide recep…	7186 // G-protein coupled receptor protein signaling pathway // inferred from sequence or structural similarity /// 7186 // G-protein coupled receptor protein signaling pathway // non-traceable author statement /// 7292 // female gamete generation // inferred from electronic annotation /// 19226 // transmission of nerve impulse // inferred from electronic annotation /// 19722 // calcium-mediated …	5887 // integral to plasma membrane // inferred from sequence or structural similarity /// 16021 // integral to membrane // inferred from sequence or structural similarity /// 16021 // integral to membrane // inferred from electronic annotation /// 16020 // membrane // inferred from electronic annotation /// 5887 // integral to plasma membrane // inferred from sequence similarity /// 16021 // int…	IPR000276 // Rhodopsin-like GPCR superfamily // 1.1E-57
5453	146652_at	-0.827905	2.7197	-11.7609	4.74977e-13	1.56575e-11	19.6247	FBgn0033035	CG17337	CG17337	CG17337	35507	5515 // protein binding // inferred from physical interaction /// 8237 // metallopeptidase activity // inferred from electronic annotation /// 16787 // hydrolase activity // inferred from electronic annotation /// 46983 // protein dimerization activity // inferred from electronic annotation	6508 // proteolysis // inferred from electronic annotation	---	IPR002933 // Peptidase M20 // 6.3E-67
5530	146729_at	-1.70683	-0.469099	-11.7493	4.87186e-13	1.59847e-11	19.5991	FBgn0033155	CG1845	CG1845	CG1845	35648	3676 // nucleic acid binding // inferred from electronic annotation /// 3677 // DNA binding // inferred from electronic annotation /// 8270 // zinc ion binding // inferred from electronic annotation /// 30528 // transcription regulator activity // inferred from electronic annotation /// 5515 // protein binding // inferred from physical interaction /// 5515 // protein binding // inferred from elec…	6139 // nucleobase, nucleoside, nucleotide and nucleic acid metabolism // inferred from electronic annotation /// 6355 // regulation of transcription, DNA-dependent // inferred from electronic annotation /// 6366 // transcription from RNA polymerase II promoter // inferred from electronic annotation /// 6367 // transcription initiation from RNA polymerase II promoter // inferred from electronic a…	5634 // nucleus // inferred from electronic annotation	IPR001965 // Zn-finger-like, PHD finger // 3.2E-14 /// IPR000313 // PWWP domain // 3.8E-17 /// IPR001487 // Bromodomain // 7.8E-33
12583	153782_at	-1.26466	5.32773	-11.7047	5.37415e-13	1.7447e-11	19.5	FBgn0035978	CG4347	UGP	UGP	39065	3983 // UTP:glucose-1-phosphate uridylyltransferase activity // inferred from sequence or structural similarity /// 42802 // identical protein binding // inferred from physical interaction /// 16779 // nucleotidyltransferase activity // inferred from electronic annotation /// 3983 // UTP:glucose-1-phosphate uridylyltransferase activity // inferred from sequence similarity	5976 // polysaccharide metabolism // inferred from electronic annotation /// 8152 // metabolism // inferred from electronic annotation	---	IPR002618 // UTP--glucose-1-phosphate uridylyltransferase // 1.0E-126 /// IPR002618 // UTP--glucose-1-phosphate uridylyltransferase // 1.0E-126
10665	151864_at	-0.745192	2.44684	-11.6881	5.57375e-13	1.79927e-11	19.4632	FBgn0041150	CG12787	hoe1	hoepel1	249663	5215 // transporter activity // inferred from sequence or structural similarity /// 5302 // L-tyrosine transporter activity // non-traceable author statement /// 8324 // cation transporter activity // inferred from electronic annotation /// 15105 // arsenite transporter activity // inferred from electronic annotation /// 15137 // citrate transporter activity // inferred from electronic annotation…	6810 // transport // inferred from sequence or structural similarity /// 6812 // cation transport // inferred from electronic annotation /// 6820 // anion transport // inferred from electronic annotation /// 15746 // citrate transport // inferred from electronic annotation /// 6810 // transport // inferred from sequence similarity	16020 // membrane // non-traceable author statement /// 16021 // integral to membrane // inferred from electronic annotation	---
7871	149070_at	-0.772979	0.619057	-11.6867	5.59119e-13	1.80075e-11	19.4601	FBgn0052209	CG32209	CG32209	CG32209	40150	8061 // chitin binding // inferred from electronic annotation /// 16810 // hydrolase activity, acting on carbon-nitrogen (but not peptide) bonds // inferred from electronic annotation	5975 // carbohydrate metabolism // inferred from electronic annotation /// 6030 // chitin metabolism // inferred from electronic annotation	5576 // extracellular region // inferred from electronic annotation	IPR002172 // Low density lipoprotein-receptor, class A // 3.5E-9 /// IPR002509 // Polysaccharide deacetylase // 7.1E-7 /// IPR002557 // Chitin binding Peritrophin-A // 4.3E-15
13691	154890_at	-0.833239	2.00032	-11.6668	5.84128e-13	1.86415e-11	19.4159	FBgn0036289	CG10657	CG10657	CG10657	39423	5386 // carrier activity // inferred from electronic annotation /// 16918 // retinal binding // inferred from sequence or structural similarity /// 5515 // protein binding // inferred from physical interaction /// 5215 // transporter activity // inferred from electronic annotation /// 16918 // retinal binding // inferred from sequence similarity	6732 // coenzyme metabolism // inferred from electronic annotation /// 6810 // transport // inferred from electronic annotation /// 51189 // prosthetic group metabolism // inferred from electronic annotation	5622 // intracellular // inferred from electronic annotation	IPR001251 // Cellular retinaldehyde-binding)/triple function, C-terminal // 1.3E-10
3848	145047_at	-1.0468	0.214122	-11.6306	6.32727e-13	2.00227e-11	19.3352	FBgn0052603	CG32603	CG32603	CG32603	318109	---	---	---	---
10075	151274_at	-0.84088	0.28029	-11.631	6.32216e-13	2.00227e-11	19.336	---	---	---	---	---	---	---	---	---
11801	153000_at	-0.907116	0.800974	-11.6303	6.33125e-13	2.00227e-11	19.3346	FBgn0035241	CG12105	CG12105	CG12105	38190	---	---	---	---
7638	148837_at	-0.800335	1.00961	-11.6226	6.4398e-13	2.02745e-11	19.3174	FBgn0036551	CG17029	CG17029	CG17029	39740	8934 // inositol-1(or 4)-monophosphatase activity // inferred from sequence or structural similarity /// 8934 // inositol-1(or 4)-monophosphatase activity // non-traceable author statement /// 4437 // inositol or phosphatidylinositol phosphatase activity // inferred from electronic annotation /// 8934 // inositol-1(or 4)-monophosphatase activity // inferred from sequence similarity	6644 // phospholipid metabolism // inferred from electronic annotation /// 7242 // intracellular signaling cascade // inferred from electronic annotation /// 16311 // dephosphorylation // non-traceable author statement	---	IPR000760 // Inositol monophosphatase // 7.1E-104
12746	153945_at	-0.906783	2.82361	-11.6228	6.43724e-13	2.02745e-11	19.3178	FBgn0035252	CG7970	CG7970	CG7970	38205	5515 // protein binding // inferred from physical interaction	---	5778 // peroxisomal membrane // inferred from sequence or structural similarity /// 5829 // cytosol // inferred from direct assay /// 16021 // integral to membrane // inferred from electronic annotation /// 5778 // peroxisomal membrane // inferred from sequence similarity	---
10921	152120_at	-0.897473	4.46055	-11.6084	6.64557e-13	2.08754e-11	19.2856	FBgn0038194	CG3050	Cyp6d5	Cyp6d5	41706	4497 // monooxygenase activity // inferred from electronic annotation /// 16491 // oxidoreductase activity // inferred from electronic annotation /// 5506 // iron ion binding // inferred from electronic annotation /// 5515 // protein binding // inferred from physical interaction /// 20037 // heme binding // inferred from electronic annotation /// 46872 // metal ion binding // inferred from electr…	6118 // electron transport // inferred from electronic annotation /// 8202 // steroid metabolism // inferred from electronic annotation	5792 // microsome // non-traceable author statement /// 16020 // membrane // non-traceable author statement /// 5783 // endoplasmic reticulum // inferred from electronic annotation /// 5792 // microsome // inferred from electronic annotation /// 16020 // membrane // inferred from electronic annotation	IPR001128 // Cytochrome P450 // 2.8E-88 /// IPR001128 // Cytochrome P450 // 8.7E-32
8952	150151_at	-1.34974	2.99004	-11.5718	7.20592e-13	2.24344e-11	19.2039	FBgn0038631	CG7695	CG7695	CG7695	42234	---	---	---	---
6303	147502_at	-0.631869	0.802743	-11.5636	7.3379e-13	2.27258e-11	19.1856	FBgn0034454	CG15120	CG15120	CG15120	37248	---	---	---	---
12862	154061_at	-0.780466	2.95946	-11.5538	7.49922e-13	2.31419e-11	19.1636	FBgn0031907	CG5171	CG5171	CG5171	34016	4805 // trehalose-phosphatase activity // inferred from sequence or structural similarity /// 3824 // catalytic activity // inferred from electronic annotation /// 4805 // trehalose-phosphatase activity // inferred from sequence similarity	5984 // disaccharide metabolism // inferred from electronic annotation /// 5992 // trehalose biosynthesis // inferred from electronic annotation /// 8152 // metabolism // inferred from electronic annotation	---	IPR003337 // Trehalose-phosphatase // 2.6E-35
248	141447_at	-0.728555	0.76107	-11.5501	7.56104e-13	2.32813e-11	19.1553	FBgn0036436	CG4914	CG4914	CG4914	39597	3677 // DNA binding // inferred from electronic annotation /// 3700 // transcription factor activity // inferred from electronic annotation /// 4252 // serine-type endopeptidase activity // inferred from sequence or structural similarity /// 4263 // chymotrypsin activity // inferred from electronic annotation /// 4295 // trypsin activity // non-traceable author statement /// 4252 // serine-type e…	6355 // regulation of transcription, DNA-dependent // inferred from electronic annotation /// 6508 // proteolysis // non-traceable author statement /// 6508 // proteolysis // inferred from electronic annotation	5634 // nucleus // inferred from electronic annotation	IPR001254 // Peptidase S1, chymotrypsin // 1.3E-87
11335	152534_at	-1.33207	3.57501	-11.5381	7.7664e-13	2.38613e-11	19.1283	FBgn0032889	CG9331	CG9331	CG9331	35347	16614 // oxidoreductase activity, acting on CH-OH group of donors // inferred from sequence or structural similarity /// 16616 // oxidoreductase activity, acting on the CH-OH group of donors, NAD or NADP as acceptor // inferred from electronic annotation /// 51287 // NAD binding // inferred from electronic annotation /// 16614 // oxidoreductase activity, acting on CH-OH group of donors // inferre…	5975 // carbohydrate metabolism // inferred from electronic annotation /// 6564 // L-serine biosynthesis // inferred from electronic annotation /// 8652 // amino acid biosynthesis // inferred from electronic annotation /// 8152 // metabolism // inferred from electronic annotation	---	IPR006140 // D-isomer specific 2-hydroxyacid dehydrogenase, NAD binding domain // 1.5E-72 /// IPR006139 // D-isomer specific 2-hydroxyacid dehydrogenase, catalytic domain // 1.1E-19 /// IPR006140 // D-isomer specific 2-hydroxyacid dehydrogenase, NAD binding domain // 1.5E-72 /// IPR006139 // D-isomer specific 2-hydroxyacid dehydrogenase, catalytic domain // 1.1E-19 /// IPR006140 // D-isomer speci…
2678	143877_at	-1.37152	3.39646	-11.5104	8.25941e-13	2.51553e-11	19.0661	FBgn0016687	CG4634	Nurf-38	Nucleosome remodeling factor - 38kD	37922	287 // magnesium ion binding // inferred from electronic annotation /// 4427 // inorganic diphosphatase activity // inferred from direct assay /// 4427 // inorganic diphosphatase activity // inferred from sequence or structural similarity /// 4427 // inorganic diphosphatase activity // non-traceable author statement /// 5515 // protein binding // inferred from physical interaction /// 4427 // ino…	6338 // chromatin remodeling // inferred from direct assay /// 6350 // transcription // inferred from direct assay /// 6798 // polyphosphate catabolism // inferred from electronic annotation /// 42766 // nucleosome mobilization // inferred from direct assay /// 6796 // phosphate metabolism // inferred from electronic annotation	5634 // nucleus // inferred from direct assay /// 5634 // nucleus // non-traceable author statement /// 5737 // cytoplasm // inferred from direct assay /// 5737 // cytoplasm // non-traceable author statement /// 16020 // membrane // inferred from electronic annotation /// 16589 // NURF complex // inferred from direct assay /// 16589 // NURF complex // inferred from physical interaction /// 16589 …	IPR008162 // Inorganic pyrophosphatase // 3.4E-106
2736	143935_s_at	-0.79615	0.339164	-11.5113	8.24177e-13	2.51553e-11	19.0683	FBgn0020637 /// FBgn0042120 /// FBgn0020638	CG18779 /// CG10534 /// CG10530	Lcp65Ag2 /// CG18779 /// Lcp65Ag1	Lcp65Ag2 /// CG18779 /// Lcp65Ag1	38702 /// 38703 /// 59159	8010 // structural constituent of larval cuticle (sensu Insecta) // inferred from sequence or structural similarity /// 8010 // structural constituent of larval cuticle (sensu Insecta) // non-traceable author statement /// 5515 // protein binding // inferred from physical interaction /// 5198 // structural molecule activity // inferred from electronic annotation /// 42302 // structural constituen…	8363 // larval cuticle biosynthesis (sensu Insecta) // non-traceable author statement	5576 // extracellular region // non-traceable author statement	IPR000618 // Insect cuticle protein // 4.4E-31 /// IPR000618 // Insect cuticle protein // 2.3E-31
7817	149016_at	-0.956831	3.61607	-11.5118	8.23334e-13	2.51553e-11	19.0693	FBgn0036820	CG6852	CG6852	CG6852	40053	---	6118 // electron transport // inferred from electronic annotation /// 45454 // cell redox homeostasis // inferred from electronic annotation	---	IPR002109 // Glutaredoxin // 1.7E-32
2141	143340_f_at	-2.52303	5.27556	-11.5009	8.43559e-13	2.56361e-11	19.0448	FBgn0003356 /// FBgn0003357	CG31362 /// CG31034	Jon99Cii /// Jon99Ciii	Jonah 99Cii /// Jonah 99Ciii	43543 /// 43544	4252 // serine-type endopeptidase activity // inferred from sequence or structural similarity /// 4252 // serine-type endopeptidase activity // non-traceable author statement /// 4263 // chymotrypsin activity // non-traceable author statement /// 4295 // trypsin activity // inferred from electronic annotation /// 8236 // serine-type peptidase activity // non-traceable author statement /// 4252 //…	6508 // proteolysis // non-traceable author statement /// 7586 // digestion // non-traceable author statement /// 6508 // proteolysis // inferred from electronic annotation	---	IPR001254 // Peptidase S1, chymotrypsin // 1.1E-57
1834	143033_at	-1.03354	1.2656	-11.491	8.62265e-13	2.61479e-11	19.0227	FBgn0001089	CG9092	Gal	galactosidase	33839	4565 // beta-galactosidase activity // inferred from direct assay /// 4565 // beta-galactosidase activity // inferred from sequence or structural similarity /// 4565 // beta-galactosidase activity // inferred from electronic annotation /// 4565 // beta-galactosidase activity // inferred from sequence similarity	5975 // carbohydrate metabolism // inferred from electronic annotation	5764 // lysosome // inferred from sequence or structural similarity /// 9341 // beta-galactosidase complex // inferred from electronic annotation /// 5764 // lysosome // inferred from sequence similarity	IPR001944 // Glycoside hydrolase, family 35 // 5.1E-100 /// IPR001944 // Glycoside hydrolase, family 35 // 2.3E-8
8235	149434_at	-0.647792	0.393971	-11.4872	8.69606e-13	2.63136e-11	19.0141	FBgn0037488	CG14607	CG14607	CG14607	40869	---	---	---	IPR002557 // Chitin binding Peritrophin-A // 1.2E-18
11701	152900_at	-1.10953	4.2389	-11.4829	8.78004e-13	2.65104e-11	19.0044	FBgn0025454	CG8453	Cyp6g1	Cyp6g1	36316	4497 // monooxygenase activity // inferred from electronic annotation /// 16491 // oxidoreductase activity // inferred from electronic annotation /// 5506 // iron ion binding // inferred from electronic annotation /// 20037 // heme binding // inferred from electronic annotation /// 46872 // metal ion binding // inferred from electronic annotation	6118 // electron transport // inferred from electronic annotation /// 17085 // response to insecticide // inferred from mutant phenotype /// 46680 // response to DDT // inferred from mutant phenotype /// 46683 // response to organophosphorus // inferred from mutant phenotype	5792 // microsome // non-traceable author statement /// 16020 // membrane // non-traceable author statement /// 16020 // membrane // inferred from electronic annotation /// 5783 // endoplasmic reticulum // inferred from electronic annotation /// 5792 // microsome // inferred from electronic annotation /// 5789 // endoplasmic reticulum membrane // non-traceable author statement	IPR001128 // Cytochrome P450 // 4.6E-87 /// IPR001128 // Cytochrome P450 // 1.4E-77
13757	154956_at	-0.817292	1.48722	-11.4688	9.05959e-13	2.70629e-11	18.9727	FBgn0039073	CG4408	CG4408	CG4408	42762	4181 // metallocarboxypeptidase activity // inferred from sequence or structural similarity /// 4182 // carboxypeptidase A activity // inferred from electronic annotation /// 4181 // metallocarboxypeptidase activity // inferred from sequence similarity	6508 // proteolysis // inferred from electronic annotation	---	IPR000834 // Peptidase M14, carboxypeptidase A // 1.8E-68
7490	148689_at	-1.17733	2.84569	-11.4667	9.10284e-13	2.7114e-11	18.9679	FBgn0036334	CG11267	CG11267	CG11267	39476	5524 // ATP binding // inferred from electronic annotation /// 42623 // ATPase activity, coupled // inferred from electronic annotation /// 51082 // unfolded protein binding // inferred from sequence or structural similarity /// 5515 // protein binding // inferred from physical interaction /// 51082 // unfolded protein binding // inferred from electronic annotation /// 51082 // unfolded protein b…	6458 // 'de novo' protein folding // inferred from sequence or structural similarity /// 6457 // protein folding // inferred from electronic annotation /// 6458 // 'de novo' protein folding // inferred from sequence similarity	5739 // mitochondrion // inferred from sequence or structural similarity /// 5759 // mitochondrial matrix // inferred from sequence or structural similarity /// 5739 // mitochondrion // inferred from sequence similarity /// 5759 // mitochondrial matrix // inferred from sequence similarity	IPR001476 // Chaperonin Cpn10 // 4.6E-38
10882	152081_at	-0.707555	2.07458	-11.4661	9.11541e-13	2.7114e-11	18.9665	FBgn0036760	CG5567	CG5567	CG5567	39986	3869 // 4-nitrophenylphosphatase activity // inferred from sequence or structural similarity /// 3869 // 4-nitrophenylphosphatase activity // inferred from sequence similarity	8152 // metabolism // inferred from electronic annotation	---	IPR005834 // Haloacid dehalogenase-like hydrolase // 2.7E-17
4499	145698_at	-1.32152	1.5458	-11.4396	9.67045e-13	2.86434e-11	18.9069	FBgn0031517	CG15406	CG15406	CG15406	33542	5353 // fructose transporter activity // inferred from sequence or structural similarity /// 5215 // transporter activity // inferred from electronic annotation /// 5353 // fructose transporter activity // inferred from sequence similarity	5975 // carbohydrate metabolism // inferred from electronic annotation /// 8643 // carbohydrate transport // inferred from electronic annotation /// 6810 // transport // inferred from electronic annotation	16020 // membrane // inferred from electronic annotation /// 16021 // integral to membrane // inferred from electronic annotation	IPR005828 // General substrate transporter // 3.4E-31
13638	154837_at	-0.524326	1.27617	-11.4322	9.83162e-13	2.90593e-11	18.8902	FBgn0034275	CG5002	CG5002	CG5002	37025	5215 // transporter activity // non-traceable author statement /// 15381 // high affinity sulfate permease activity // inferred from sequence or structural similarity /// 5515 // protein binding // inferred from physical interaction /// 5215 // transporter activity // inferred from electronic annotation /// 15381 // high affinity sulfate permease activity // inferred from sequence similarity	6790 // sulfur metabolism // inferred from electronic annotation /// 6820 // anion transport // inferred from electronic annotation /// 6858 // extracellular transport // inferred from electronic annotation /// 6810 // transport // inferred from electronic annotation	16020 // membrane // inferred from electronic annotation /// 16021 // integral to membrane // inferred from electronic annotation	IPR001902 // Sulphate transporter // 2.4E-65
2139	143338_f_at	-2.3304	5.2732	-11.4066	1.04102e-12	3.06401e-11	18.8324	FBgn0003356 /// FBgn0003357	CG31362 /// CG31034	Jon99Cii /// Jon99Ciii	Jonah 99Cii /// Jonah 99Ciii	43543 /// 43544	4252 // serine-type endopeptidase activity // inferred from sequence or structural similarity /// 4252 // serine-type endopeptidase activity // non-traceable author statement /// 4263 // chymotrypsin activity // non-traceable author statement /// 4295 // trypsin activity // inferred from electronic annotation /// 8236 // serine-type peptidase activity // non-traceable author statement /// 5515 //…	6508 // proteolysis // non-traceable author statement /// 7586 // digestion // non-traceable author statement /// 6508 // proteolysis // inferred from electronic annotation	---	IPR001254 // Peptidase S1, chymotrypsin // 1.1E-57 /// IPR001254 // Peptidase S1, chymotrypsin // 1.2E-22
11281	152480_at	-0.806808	3.22924	-11.3986	1.05968e-12	3.10626e-11	18.8145	FBgn0022097	CG8186	Vha36	Vha36	44702	8553 // hydrogen-exporting ATPase activity, phosphorylative mechanism // inferred from sequence or structural similarity /// 8553 // hydrogen-exporting ATPase activity, phosphorylative mechanism // non-traceable author statement /// 46933 // hydrogen-transporting ATP synthase activity, rotational mechanism // inferred from electronic annotation /// 46961 // hydrogen-transporting ATPase activity, …	6144 // purine base metabolism // inferred from electronic annotation /// 15986 // ATP synthesis coupled proton transport // inferred from electronic annotation /// 15992 // proton transport // inferred from sequence or structural similarity /// 6754 // ATP biosynthesis // inferred from electronic annotation /// 6810 // transport // inferred from electronic annotation /// 6811 // ion transport //…	221 // hydrogen-transporting ATPase V1 domain // inferred from sequence or structural similarity /// 221 // hydrogen-transporting ATPase V1 domain // non-traceable author statement /// 16469 // proton-transporting two-sector ATPase complex // inferred from electronic annotation /// 221 // hydrogen-transporting ATPase V1 domain // inferred from sequence similarity	IPR002699 // H+-transporting two-sector ATPase, D subunit // 9.9E-89
12069	153268_at	-0.749391	0.0353948	-11.3569	1.16354e-12	3.39468e-11	18.7201	FBgn0028434	CG10215	Ercc1	Ercc1	36654	14 // single-stranded DNA specific endodeoxyribonuclease activity // inferred from sequence or structural similarity /// 3676 // nucleic acid binding // inferred from electronic annotation /// 3677 // DNA binding // inferred from electronic annotation /// 3684 // damaged DNA binding // inferred from electronic annotation /// 5515 // protein binding // inferred from physical interaction /// 4519 /…	6289 // nucleotide-excision repair // non-traceable author statement /// 6281 // DNA repair // inferred from electronic annotation	5634 // nucleus // inferred from electronic annotation /// 5622 // intracellular // inferred from electronic annotation	IPR004579 // DNA repair protein rad10 // 1.2E-46
2266	143465_f_at	-2.39805	2.13452	-11.352	1.17649e-12	3.41254e-11	18.7089	FBgn0004426 /// FBgn0011201	CG9111	LysC /// LysA	Lysozyme C /// Lysozyme A	38126	3796 // lysozyme activity // inferred from sequence or structural similarity /// 3796 // lysozyme activity // non-traceable author statement /// 5515 // protein binding // inferred from physical interaction /// 3796 // lysozyme activity // inferred from electronic annotation /// 3824 // catalytic activity // inferred from electronic annotation /// 16787 // hydrolase activity // inferred from elec…	6960 // antimicrobial humoral response (sensu Protostomia) // non-traceable author statement /// 5975 // carbohydrate metabolism // inferred from electronic annotation /// 16998 // cell wall catabolism // inferred from electronic annotation /// 19835 // cytolysis // inferred from electronic annotation /// 42742 // defense response to bacteria // inferred from electronic annotation /// 16043 // ce…	5576 // extracellular region // inferred from electronic annotation	IPR001916 // Glycoside hydrolase, family 22 // 3.2E-65
6932	148131_at	-0.901691	0.686497	-11.3313	1.2323e-12	3.55237e-11	18.6621	FBgn0035475	CG10866	CG10866	CG10866	38461	---	---	---	---
2949	144148_at	-1.08009	1.3312	-11.2842	1.37011e-12	3.93346e-11	18.555	FBgn0026565	CG1315	CG1315	CG1315	40812	4055 // argininosuccinate synthase activity // inferred from sequence or structural similarity /// 4055 // argininosuccinate synthase activity // non-traceable author statement /// 5524 // ATP binding // inferred from electronic annotation /// 4055 // argininosuccinate synthase activity // inferred from sequence similarity	50 // urea cycle // non-traceable author statement /// 53 // argininosuccinate metabolism // inferred from sequence or structural similarity /// 6526 // arginine biosynthesis // non-traceable author statement /// 53 // argininosuccinate metabolism // inferred from sequence similarity	---	IPR001518 // Argininosuccinate synthase // 1.0E-126
13723	154922_at	-0.684545	1.39902	-11.2726	1.40636e-12	4.02926e-11	18.5286	FBgn0039690	CG1969	CG1969	CG1969	43504	4343 // glucosamine 6-phosphate N-acetyltransferase activity // non-traceable author statement /// 4343 // glucosamine 6-phosphate N-acetyltransferase activity // inferred from electronic annotation /// 8080 // N-acetyltransferase activity // inferred from electronic annotation /// 8415 // acyltransferase activity // inferred from electronic annotation /// 16740 // transferase activity // inferre…	---	---	IPR000182 // GCN5-related N-acetyltransferase // 3.7E-14 /// IPR000182 // GCN5-related N-acetyltransferase // 3.7E-14
7029	148228_at	-1.32832	1.37282	-11.2645	1.43212e-12	4.08635e-11	18.5103	FBgn0035619	CG10592	CG10592	CG10592	38632	4035 // alkaline phosphatase activity // inferred from sequence or structural similarity /// 19204 // nucleotide phosphatase activity // inferred from electronic annotation /// 4035 // alkaline phosphatase activity // inferred from sequence similarity	1501 // skeletal development // inferred from electronic annotation /// 7498 // mesoderm development // inferred from electronic annotation /// 8152 // metabolism // inferred from electronic annotation	---	IPR001952 // Alkaline phosphatase // 9.2E-84
10698	151897_at	-1.50909	2.42185	-11.2147	1.6025e-12	4.53555e-11	18.3968	FBgn0046114	CG4919	Gclm	Glutamate-cysteine ligase modifier subunit	248194	4357 // glutamate-cysteine ligase activity // Unknown /// 19899 // enzyme binding // inferred from physical interaction /// 30234 // enzyme regulator activity // inferred from sequence or structural similarity /// 35226 // glutamate-cysteine ligase catalytic subunit binding // inferred from physical interaction /// 4357 // glutamate-cysteine ligase activity // inferred from curator /// 30234 // e…	6750 // glutathione biosynthesis // inferred from direct assay /// 6750 // glutathione biosynthesis // inferred from mutant phenotype /// 6750 // glutathione biosynthesis // inferred from sequence or structural similarity /// 7611 // learning and/or memory // inferred from mutant phenotype /// 8355 // olfactory learning // inferred from mutant phenotype /// 35227 // regulation of glutamate-cystei…	17109 // glutamate-cysteine ligase complex // inferred from physical interaction /// 17109 // glutamate-cysteine ligase complex // inferred from sequence or structural similarity /// 17109 // glutamate-cysteine ligase complex // inferred from sequence similarity	---
7491	148690_at	-0.653355	0.928882	-11.1725	1.76305e-12	4.94005e-11	18.3003	FBgn0036335	CG11258	mRpL20	mitochondrial ribosomal protein L20	39477	3676 // nucleic acid binding // inferred from electronic annotation /// 3729 // mRNA binding // inferred from electronic annotation /// 3735 // structural constituent of ribosome // inferred from sequence or structural similarity /// 3735 // structural constituent of ribosome // inferred from sequence similarity	6412 // protein biosynthesis // inferred from sequence or structural similarity /// 6412 // protein biosynthesis // inferred from sequence similarity	5762 // mitochondrial large ribosomal subunit // inferred from sequence or structural similarity /// 5762 // mitochondrial large ribosomal subunit // inferred from sequence similarity	IPR005813 // Ribosomal protein L20 // 7.9E-13
13814	155013_at	-0.919957	2.01613	-11.1591	1.81745e-12	5.07222e-11	18.2696	FBgn0032601	CG17914	yellow-b	yellow-b	35005	5515 // protein binding // inferred from physical interaction	---	---	IPR003534 // Major royal jelly protein // 1.0E-126
3468	144667_at	-0.696112	0.796381	-11.1569	1.82671e-12	5.08792e-11	18.2645	FBgn0029983	CG1530	CG1530	CG1530	31711	---	---	---	IPR003126 // Zn-finger (putative), N-recognin // 1.2E-17
10683	151882_at	-0.924827	1.99333	-11.155	1.83426e-12	5.09882e-11	18.2603	FBgn0033093	CG3270	CG3270	CG3270	35575	16491 // oxidoreductase activity // inferred from electronic annotation	6118 // electron transport // inferred from electronic annotation /// 8152 // metabolism // inferred from electronic annotation	---	---
13123	154322_at	-1.00089	2.28337	-11.1482	1.86279e-12	5.16786e-11	18.2447	FBgn0035872	CG7185	CG7185	CG7185	38937	3729 // mRNA binding // inferred from sequence or structural similarity /// 5515 // protein binding // inferred from physical interaction /// 166 // nucleotide binding // inferred from electronic annotation /// 3676 // nucleic acid binding // inferred from electronic annotation /// 3729 // mRNA binding // inferred from sequence similarity	381 // regulation of alternative nuclear mRNA splicing, via spliceosome // inferred from mutant phenotype /// 6379 // mRNA cleavage // inferred from sequence or structural similarity /// 6379 // mRNA cleavage // inferred from sequence similarity	5634 // nucleus // Unknown /// 5849 // mRNA cleavage factor complex // inferred from sequence or structural similarity /// 5634 // nucleus // inferred from curator /// 5849 // mRNA cleavage factor complex // inferred from sequence similarity	IPR000504 // RNA-binding region RNP-1 (RNA recognition motif) // 3.1E-9
13030	154229_at	-0.974361	2.31481	-11.1447	1.87778e-12	5.1889e-11	18.2367	FBgn0029969	CG10932	CG10932	CG10932	31695	3985 // acetyl-CoA C-acetyltransferase activity // inferred from sequence or structural similarity /// 3985 // acetyl-CoA C-acetyltransferase activity // inferred from sequence similarity	6090 // pyruvate metabolism // inferred from sequence or structural similarity /// 6633 // fatty acid biosynthesis // inferred from sequence or structural similarity /// 6090 // pyruvate metabolism // inferred from sequence similarity /// 6633 // fatty acid biosynthesis // inferred from sequence similarity	5739 // mitochondrion // inferred from sequence or structural similarity /// 5739 // mitochondrion // inferred from sequence similarity	IPR002155 // Thiolase // 2.4E-60 /// IPR002155 // Thiolase // 1.0E-126
10797	151996_at	-1.05334	2.8139	-11.1389	1.90279e-12	5.24766e-11	18.2233	FBgn0034797	CG12781	nahoda	nahoda	37641	4500 // dopamine beta-monooxygenase activity // inferred from electronic annotation	6584 // catecholamine metabolism // inferred from electronic annotation /// 6548 // histidine catabolism // inferred from electronic annotation	---	IPR005018 // DOMON domain // 5.1E-33 /// IPR005018 // DOMON domain // 1.3E-42
13631	154830_at	-0.698445	2.12175	-11.1358	1.91614e-12	5.27409e-11	18.2162	FBgn0039341	CG5112	CG5112	CG5112	43083	4040 // amidase activity // inferred from electronic annotation /// 17064 // fatty acid amide hydrolase activity // inferred from sequence or structural similarity /// 17064 // fatty acid amide hydrolase activity // inferred from sequence similarity	6418 // tRNA aminoacylation for protein translation // inferred from electronic annotation /// 6807 // nitrogen compound metabolism // inferred from electronic annotation	---	IPR000120 // Amidase // 4.2E-58 /// IPR000120 // Amidase // 4.4E-9
7958	149157_at	-0.805656	0.977743	-11.1337	1.92526e-12	5.2888e-11	18.2114	FBgn0037039	CG10587	CG10587	CG10587	40318	4175 // endopeptidase activity // inferred from sequence or structural similarity /// 4263 // chymotrypsin activity // inferred from electronic annotation /// 4295 // trypsin activity // non-traceable author statement /// 4175 // endopeptidase activity // inferred from sequence similarity	6508 // proteolysis // non-traceable author statement	---	IPR001254 // Peptidase S1, chymotrypsin // 1.3E-51
4799	145998_at	-0.826764	0.234659	-11.1308	1.93775e-12	5.3127e-11	18.2049	FBgn0031968	CG7231	CG7231	CG7231	34086	---	---	---	---
2627	143826_at	-1.16196	3.28914	-11.1283	1.94906e-12	5.33326e-11	18.199	FBgn0015585	CG10852	Acp63F	Accessory gland peptide 63F	38448	---	7582 // physiological process // non-traceable author statement /// 45297 // post-mating behavior // non-traceable author statement /// 7610 // behavior // inferred from electronic annotation	---	---
8922	150121_at	-1.03018	4.03422	-11.1256	1.96109e-12	5.35571e-11	18.1928	FBgn0038587	CG7998	CG7998	CG7998	42185	30060 // L-malate dehydrogenase activity // inferred from sequence or structural similarity /// 4459 // L-lactate dehydrogenase activity // inferred from electronic annotation /// 16491 // oxidoreductase activity // inferred from electronic annotation /// 30060 // L-malate dehydrogenase activity // inferred from electronic annotation /// 30060 // L-malate dehydrogenase activity // inferred from s…	6099 // tricarboxylic acid cycle // inferred from sequence or structural similarity /// 6100 // tricarboxylic acid cycle intermediate metabolism // inferred from electronic annotation /// 6108 // malate metabolism // inferred from electronic annotation /// 6096 // glycolysis // inferred from electronic annotation /// 6099 // tricarboxylic acid cycle // inferred from sequence similarity	5759 // mitochondrial matrix // inferred from sequence or structural similarity /// 5759 // mitochondrial matrix // inferred from sequence similarity	IPR001236 // Lactate/malate dehydrogenase // 2.7E-69 /// IPR001236 // Lactate/malate dehydrogenase // 6.0E-63
3123	144322_at	-0.918899	0.645841	-11.0774	2.18796e-12	5.9521e-11	18.0822	FBgn0028939	CG18146	CG18146	CG18146	34818	5102 // receptor binding // inferred from electronic annotation /// 5198 // structural molecule activity // inferred from electronic annotation	7154 // cell communication // inferred from electronic annotation /// 7160 // cell-matrix adhesion // inferred from electronic annotation /// 7165 // signal transduction // inferred from electronic annotation	---	IPR006209 // EGF-like domain // 6.8E-4 /// IPR006209 // EGF-like domain // 6.8E-4
8502	149701_at	-0.848811	2.19324	-11.0406	2.37968e-12	6.4114e-11	17.9974	FBgn0037936	CG6908	CG6908	CG6908	41410	16301 // kinase activity // inferred from electronic annotation /// 16740 // transferase activity // inferred from electronic annotation	---	---	IPR004119 // Protein of unknown function DUF227 // 8.4E-110
2312	143511_at	-1.31454	1.49882	-11.0394	2.38622e-12	6.41668e-11	17.9946	FBgn0004779	CG1330	Ccp84Ae	Ccp84Ae	40821	8010 // structural constituent of larval cuticle (sensu Insecta) // inferred from sequence or structural similarity /// 42302 // structural constituent of cuticle // inferred from electronic annotation /// 8010 // structural constituent of larval cuticle (sensu Insecta) // inferred from sequence similarity	---	---	IPR000618 // Insect cuticle protein // 3.6E-28
268	141467_at	-0.651785	2.05658	-11.0355	2.40726e-12	6.4486e-11	17.9857	FBgn0003175	CG4444	px	plexus	37573	---	8586 // wing vein morphogenesis // traceable author statement	5654 // nucleoplasm // non-traceable author statement	---
13778	154977_at	-0.706509	1.68242	-11.0355	2.40729e-12	6.4486e-11	17.9857	FBgn0030306	CG1751	CG1751	CG1751	32095	9003 // signal peptidase activity // inferred from sequence or structural similarity /// 9003 // signal peptidase activity // non-traceable author statement /// 8233 // peptidase activity // inferred from electronic annotation /// 9003 // signal peptidase activity // inferred from electronic annotation /// 16787 // hydrolase activity // inferred from electronic annotation /// 9003 // signal pepti…	6465 // signal peptide processing // inferred from sequence or structural similarity /// 6508 // proteolysis // inferred from electronic annotation /// 6465 // signal peptide processing // inferred from electronic annotation /// 6465 // signal peptide processing // inferred from sequence similarity	5787 // signal peptidase complex // inferred from sequence or structural similarity /// 5792 // microsome // inferred from electronic annotation /// 16021 // integral to membrane // non-traceable author statement /// 5783 // endoplasmic reticulum // inferred from electronic annotation /// 5787 // signal peptidase complex // inferred from electronic annotation /// 16020 // membrane // inferred fro…	IPR009582 // Microsomal signal peptidase 25 kDa subunit // 6.9E-118
9880	151079_at	-1.21436	-0.392158	-11.0001	2.61008e-12	6.95195e-11	17.904	FBgn0040591	CG13828	CG13828	CG13828	50064	---	---	---	---
5524	146723_at	-0.700661	1.14836	-10.9327	3.04569e-12	8.03581e-11	17.7481	---	---	---	---	---	---	---	---	---
11704	152903_at	-0.97396	2.74793	-10.9248	3.102e-12	8.16898e-11	17.7296	FBgn0038924	CG6028	CG6028	CG6028	42589	16829 // lyase activity // inferred from electronic annotation /// 16831 // carboxy-lyase activity // inferred from electronic annotation /// 16853 // isomerase activity // inferred from electronic annotation /// 3824 // catalytic activity // inferred from electronic annotation	6520 // amino acid metabolism // inferred from electronic annotation /// 9063 // amino acid catabolism // inferred from electronic annotation /// 8152 // metabolism // inferred from electronic annotation	---	IPR002529 // Fumarylacetoacetate (FAA) hydrolase // 3.2E-38 /// IPR002529 // Fumarylacetoacetate (FAA) hydrolase // 5.3E-65
6409	147608_at	-1.19181	2.05064	-10.9115	3.19798e-12	8.40595e-11	17.6988	FBgn0027073	CG4302	CG4302	CG4302	37420	15020 // glucuronosyltransferase activity // inferred from sequence or structural similarity /// 5515 // protein binding // inferred from physical interaction /// 16740 // transferase activity // inferred from electronic annotation /// 16757 // transferase activity, transferring glycosyl groups // inferred from electronic annotation /// 16758 // transferase activity, transferring hexosyl groups /…	5976 // polysaccharide metabolism // inferred from electronic annotation /// 6952 // defense response // inferred from electronic annotation /// 9636 // response to toxin // inferred from electronic annotation /// 8152 // metabolism // inferred from electronic annotation	---	IPR002213 // UDP-glucoronosyl/UDP-glucosyl transferase // 2.1E-77
11874	153073_at	-1.41912	2.82575	-10.9087	3.21843e-12	8.42808e-11	17.6924	FBgn0033837	CG17034	CG17034	CG17034	36488	5524 // ATP binding // inferred from electronic annotation /// 15662 // ATPase activity, coupled to transmembrane movement of ions, phosphorylative mechanism // inferred from sequence or structural similarity /// 16820 // hydrolase activity, acting on acid anhydrides, catalyzing transmembrane movement of substances // inferred from electronic annotation /// 166 // nucleotide binding // inferred f…	6629 // lipid metabolism // inferred from electronic annotation /// 6812 // cation transport // inferred from electronic annotation /// 6869 // lipid transport // inferred from electronic annotation /// 8152 // metabolism // inferred from electronic annotation	16020 // membrane // inferred from electronic annotation /// 16021 // integral to membrane // inferred from electronic annotation	---
2978	144177_at	-0.714942	0.563609	-10.9065	3.23508e-12	8.44012e-11	17.6872	FBgn0027343	CG16785	fz3	frizzled 3	31023	4888 // transmembrane receptor activity // inferred from sequence or structural similarity /// 4930 // G-protein coupled receptor activity // inferred from electronic annotation /// 17147 // Wnt-protein binding // inferred from sequence or structural similarity /// 42813 // Wnt receptor activity // non-traceable author statement /// 4871 // signal transducer activity // inferred from electronic a…	7163 // establishment and/or maintenance of cell polarity // inferred from mutant phenotype /// 7165 // signal transduction // inferred from sequence or structural similarity /// 7186 // G-protein coupled receptor protein signaling pathway // inferred from electronic annotation /// 7222 // frizzled signaling pathway // non-traceable author statement /// 7267 // cell-cell signaling // inferred fro…	5886 // plasma membrane // inferred from electronic annotation /// 16021 // integral to membrane // inferred from sequence or structural similarity /// 16021 // integral to membrane // non-traceable author statement /// 16020 // membrane // inferred from electronic annotation /// 16021 // integral to membrane // inferred from electronic annotation /// 16021 // integral to membrane // inferred fro…	IPR000539 // Frizzled protein // 1.5E-15 /// IPR000539 // Frizzled protein // 1.8E-12 /// IPR000024 // Frizzled CRD region // 4.9E-40
11644	152843_at	-1.10432	1.53647	-10.8977	3.30084e-12	8.59569e-11	17.6668	FBgn0019952	CG6331	Orct	Organic cation transporter	42891	8324 // cation transporter activity // inferred from electronic annotation /// 15101 // organic cation transporter activity // inferred from sequence or structural similarity /// 5515 // protein binding // inferred from physical interaction /// 5215 // transporter activity // inferred from electronic annotation /// 15101 // organic cation transporter activity // inferred from sequence similarity	6812 // cation transport // inferred from electronic annotation /// 6858 // extracellular transport // inferred from electronic annotation /// 6915 // apoptosis // traceable author statement /// 15695 // organic cation transport // inferred from sequence or structural similarity /// 6810 // transport // inferred from electronic annotation /// 6811 // ion transport // inferred from electronic anno…	16021 // integral to membrane // non-traceable author statement /// 16020 // membrane // inferred from electronic annotation /// 16021 // integral to membrane // inferred from electronic annotation	IPR005828 // General substrate transporter // 1.1E-20
200	141399_at	-0.774035	0.620323	-10.8741	3.48529e-12	9.02569e-11	17.6119	FBgn0020506	CG8221	Amyrel	Amyrel	36863	4556 // alpha-amylase activity // non-traceable author statement /// 4574 // oligo-1,6-glucosidase activity // non-traceable author statement /// 4556 // alpha-amylase activity // inferred from electronic annotation /// 5509 // calcium ion binding // inferred from electronic annotation /// 16787 // hydrolase activity // inferred from electronic annotation /// 16798 // hydrolase activity, acting o…	5975 // carbohydrate metabolism // inferred from electronic annotation	---	IPR006048 // Alpha amylase, C-terminal all-beta domain // 8.8E-53 /// IPR006047 // Alpha amylase, catalytic domain // 2.1E-84
5627	146826_at	-1.0514	0.190411	-10.8494	3.68939e-12	9.51903e-11	17.5544	FBgn0001285	CG8579	Jon44E	Jonah 44E	35853	4263 // chymotrypsin activity // inferred from sequence or structural similarity /// 4263 // chymotrypsin activity // non-traceable author statement /// 4295 // trypsin activity // inferred from electronic annotation /// 4252 // serine-type endopeptidase activity // inferred from electronic annotation /// 8233 // peptidase activity // inferred from electronic annotation /// 16787 // hydrolase act…	6508 // proteolysis // non-traceable author statement /// 6508 // proteolysis // inferred from electronic annotation	---	IPR001254 // Peptidase S1, chymotrypsin // 2.0E-64
11314	152513_at	-1.16391	2.67424	-10.8253	3.90013e-12	9.98918e-11	17.4983	FBgn0039311	CG10513	CG10513	CG10513	43051	16301 // kinase activity // inferred from electronic annotation /// 16740 // transferase activity // inferred from electronic annotation	---	---	IPR004119 // Protein of unknown function DUF227 // 5.7E-122
12736	153935_at	-0.637682	2.97501	-10.8124	4.01807e-12	1.02538e-10	17.4682	FBgn0034277	CG6370	CG6370	CG6370	37029	4579 // dolichyl-diphosphooligosaccharide-protein glycotransferase activity // inferred from sequence or structural similarity /// 4579 // dolichyl-diphosphooligosaccharide-protein glycotransferase activity // inferred from electronic annotation /// 4579 // dolichyl-diphosphooligosaccharide-protein glycotransferase activity // inferred from sequence similarity	6464 // protein modification // inferred from electronic annotation /// 18279 // protein amino acid N-linked glycosylation via asparagine // inferred from electronic annotation	5789 // endoplasmic reticulum membrane // inferred from electronic annotation /// 8250 // oligosaccharyl transferase complex // inferred from electronic annotation	IPR008814 // Ribophorin II // 1.0E-126
12210	153409_at	-0.885124	2.74799	-10.8032	4.10469e-12	1.04558e-10	17.4467	FBgn0004587	CG10851	B52	B52	41670	3729 // mRNA binding // inferred from sequence or structural similarity /// 3729 // mRNA binding // non-traceable author statement /// 5515 // protein binding // inferred from physical interaction /// 31202 // RNA splicing factor activity, transesterification mechanism // inferred from sequence or structural similarity /// 166 // nucleotide binding // inferred from electronic annotation /// 3676 …	381 // regulation of alternative nuclear mRNA splicing, via spliceosome // inferred from mutant phenotype /// 398 // nuclear mRNA splicing, via spliceosome // inferred from direct assay /// 398 // nuclear mRNA splicing, via spliceosome // non-traceable author statement /// 6376 // mRNA splice site selection // inferred from sequence or structural similarity /// 398 // nuclear mRNA splicing, via s…	5634 // nucleus // Unknown /// 5634 // nucleus // inferred from direct assay /// 5634 // nucleus // non-traceable author statement /// 5681 // spliceosome complex // inferred from electronic annotation /// 16607 // nuclear speck // inferred from direct assay /// 35062 // omega speckle // inferred from direct assay /// 5634 // nucleus // inferred from electronic annotation /// 5634 // nucleus // i…	IPR000504 // RNA-binding region RNP-1 (RNA recognition motif) // 2.5E-7 /// IPR000504 // RNA-binding region RNP-1 (RNA recognition motif) // 4.8E-23 /// IPR000504 // RNA-binding region RNP-1 (RNA recognition motif) // 1.6E-15 /// IPR000504 // RNA-binding region RNP-1 (RNA recognition motif) // 3.0E-10 /// IPR000504 // RNA-binding region RNP-1 (RNA recognition motif) // 1.6E-15
9075	150274_at	-1.13103	2.26459	-10.7995	4.13991e-12	1.05263e-10	17.438	FBgn0038820	CG4000	CG4000	CG4000	42451	---	---	---	---
11667	152866_at	-1.40777	3.85691	-10.7942	4.19086e-12	1.06366e-10	17.4257	FBgn0031689	CG10833	Cyp28d1	Cyp28d1	33749	4497 // monooxygenase activity // inferred from electronic annotation /// 16491 // oxidoreductase activity // inferred from electronic annotation /// 5515 // protein binding // inferred from physical interaction /// 5506 // iron ion binding // inferred from electronic annotation /// 20037 // heme binding // inferred from electronic annotation /// 46872 // metal ion binding // inferred from electr…	6118 // electron transport // inferred from electronic annotation /// 8202 // steroid metabolism // inferred from electronic annotation	5792 // microsome // non-traceable author statement /// 16020 // membrane // non-traceable author statement /// 5783 // endoplasmic reticulum // inferred from electronic annotation /// 5792 // microsome // inferred from electronic annotation /// 16020 // membrane // inferred from electronic annotation	IPR001128 // Cytochrome P450 // 4.4E-74
1268	142467_at	-0.66391	0.194663	-10.7836	4.29512e-12	1.08815e-10	17.4009	---	CG33950	---	---	---	5198 // structural molecule activity // inferred from electronic annotation	7155 // cell adhesion // inferred from electronic annotation	31012 // extracellular matrix // inferred from electronic annotation	---
13463	154662_at	-0.739399	2.95263	-10.766	4.47378e-12	1.12933e-10	17.3597	FBgn0032222	CG5037	CG5037	CG5037	34394	8415 // acyltransferase activity // inferred from electronic annotation /// 8495 // protoheme IX farnesyltransferase activity // inferred from sequence or structural similarity /// 4659 // prenyltransferase activity // inferred from electronic annotation /// 8495 // protoheme IX farnesyltransferase activity // inferred from electronic annotation /// 8495 // protoheme IX farnesyltransferase activi…	6732 // coenzyme metabolism // inferred from electronic annotation /// 48034 // heme o biosynthesis // inferred from sequence or structural similarity /// 6783 // heme biosynthesis // inferred from electronic annotation /// 48034 // heme o biosynthesis // inferred from sequence similarity	5740 // mitochondrial envelope // inferred from sequence or structural similarity /// 16021 // integral to membrane // inferred from electronic annotation /// 5740 // mitochondrial envelope // inferred from sequence similarity	IPR000537 // UbiA prenyltransferase // 2.4E-61
12514	153713_at	-1.20559	2.2184	-10.7535	4.605e-12	1.16036e-10	17.3305	FBgn0015808	CG17320	ScpX	Sterol carrier protein X-related thiolase	44183	4770 // sterol carrier protein X-related thiolase activity // inferred from sequence or structural similarity /// 4770 // sterol carrier protein X-related thiolase activity // non-traceable author statement /// 5386 // carrier activity // inferred from electronic annotation /// 5498 // sterol carrier activity // inferred from electronic annotation /// 5548 // phospholipid transporter activity // …	15914 // phospholipid transport // inferred from sequence or structural similarity /// 15914 // phospholipid transport // inferred from sequence similarity	5737 // cytoplasm // inferred from sequence or structural similarity /// 5739 // mitochondrion // inferred from sequence or structural similarity /// 5777 // peroxisome // inferred from sequence or structural similarity /// 5737 // cytoplasm // inferred from sequence similarity /// 5739 // mitochondrion // inferred from sequence similarity /// 5777 // peroxisome // inferred from sequence similari…	IPR002155 // Thiolase // 2.7E-42 /// IPR002155 // Thiolase // 6.6E-39 /// IPR003033 // Sterol-binding // 4.2E-48
9949	151148_at	-0.758409	1.86445	-10.7227	4.94593e-12	1.24139e-10	17.2583	FBgn0040666	CG12848	CG12848	CG12848	50139	---	---	---	---
10855	152054_at	-1.33983	2.20592	-10.7221	4.95315e-12	1.24139e-10	17.2568	FBgn0030425	CG3775	CG3775	CG3775	32234	4222 // metalloendopeptidase activity // inferred from sequence or structural similarity /// 4245 // neprilysin activity // inferred from electronic annotation /// 8270 // zinc ion binding // inferred from electronic annotation /// 8233 // peptidase activity // inferred from electronic annotation /// 8237 // metallopeptidase activity // inferred from electronic annotation /// 16787 // hydrolase a…	6508 // proteolysis // inferred from electronic annotation	16020 // membrane // inferred from electronic annotation	IPR008753 // Peptidase M13 // 4.2E-6 /// IPR000718 // Peptidase M13, neprilysin // 1.3E-8 /// IPR000718 // Peptidase M13, neprilysin // 1.6E-17
475	141674_at	-1.13316	4.3765	-10.7136	5.0516e-12	1.2638e-10	17.237	FBgn0003178	CG7070	PyK	Pyruvate kinase	42620	4743 // pyruvate kinase activity // inferred from sequence or structural similarity /// 4743 // pyruvate kinase activity // non-traceable author statement /// 19200 // carbohydrate kinase activity // inferred from electronic annotation /// 5515 // protein binding // inferred from physical interaction /// 287 // magnesium ion binding // inferred from electronic annotation /// 4743 // pyruvate kina…	6096 // glycolysis // non-traceable author statement /// 16310 // phosphorylation // inferred from sequence or structural similarity /// 6096 // glycolysis // inferred from electronic annotation /// 16310 // phosphorylation // inferred from sequence similarity	5829 // cytosol // inferred from direct assay	IPR001697 // Pyruvate kinase // 3.0E-57 /// IPR001697 // Pyruvate kinase // 1.0E-126 /// IPR001697 // Pyruvate kinase // 3.0E-57 /// IPR001697 // Pyruvate kinase // 1.0E-126
4437	145636_at	-1.11202	2.34606	-10.7059	5.14309e-12	1.27984e-10	17.2188	FBgn0031417	CG3597	CG3597	CG3597	33420	16491 // oxidoreductase activity // inferred from electronic annotation	6118 // electron transport // inferred from electronic annotation /// 8152 // metabolism // inferred from electronic annotation	---	IPR000683 // Oxidoreductase, N-terminal // 5.6E-28 /// IPR004104 // Oxidoreductase, C-terminal // 7.9E-6
9315	150514_at	-0.909955	2.41317	-10.706	5.14127e-12	1.27984e-10	17.2192	FBgn0039203	CG13618	CG13618	CG13618	42924	---	---	---	IPR004272 // Odorant binding protein // 9.3E-60
1299	142498_at	-1.11039	4.6427	-10.6913	5.32079e-12	1.31471e-10	17.1845	FBgn0039830	CG1746	CG1746	CG1746	43693	8553 // hydrogen-exporting ATPase activity, phosphorylative mechanism // inferred from sequence or structural similarity /// 8553 // hydrogen-exporting ATPase activity, phosphorylative mechanism // non-traceable author statement /// 46933 // hydrogen-transporting ATP synthase activity, rotational mechanism // inferred from electronic annotation /// 46961 // hydrogen-transporting ATPase activity, …	6144 // purine base metabolism // inferred from electronic annotation /// 15986 // ATP synthesis coupled proton transport // inferred from electronic annotation /// 15992 // proton transport // inferred from sequence or structural similarity /// 15992 // proton transport // inferred from sequence similarity	276 // proton-transporting ATP synthase complex, coupling factor F(o) (sensu Eukaryota) // inferred from sequence or structural similarity /// 16020 // membrane // inferred from electronic annotation /// 16469 // proton-transporting two-sector ATPase complex // inferred from electronic annotation /// 276 // proton-transporting ATP synthase complex, coupling factor F(o) (sensu Eukaryota) // inferr…	IPR002379 // H+-transporting two-sector ATPase, C subunit // 2.5E-29
4485	145684_at	-1.16364	2.11137	-10.6919	5.31279e-12	1.31471e-10	17.186	FBgn0031489	CG17224	CG17224	CG17224	33510	4850 // uridine phosphorylase activity // inferred from sequence or structural similarity /// 3824 // catalytic activity // inferred from electronic annotation /// 4850 // uridine phosphorylase activity // inferred from electronic annotation /// 4850 // uridine phosphorylase activity // inferred from sequence similarity	6206 // pyrimidine base metabolism // inferred from electronic annotation /// 9116 // nucleoside metabolism // inferred from electronic annotation /// 9166 // nucleotide catabolism // inferred from electronic annotation	5737 // cytoplasm // inferred from electronic annotation	---
5815	147014_at	-1.32004	1.52473	-10.6793	5.47161e-12	1.34723e-10	17.1563	FBgn0043470	CG12350	Try	Try	36214	4263 // chymotrypsin activity // inferred from electronic annotation /// 4295 // trypsin activity // inferred from sequence or structural similarity /// 4295 // trypsin activity // non-traceable author statement /// 4252 // serine-type endopeptidase activity // inferred from electronic annotation /// 4295 // trypsin activity // inferred from electronic annotation /// 8233 // peptidase activity //…	6508 // proteolysis // non-traceable author statement /// 6508 // proteolysis // inferred from electronic annotation	5576 // extracellular region // inferred from sequence or structural similarity /// 5576 // extracellular region // inferred from sequence similarity	IPR001254 // Peptidase S1, chymotrypsin // 2.5E-81
4003	145202_at	-1.26939	1.63979	-10.6674	5.62506e-12	1.38016e-10	17.1283	FBgn0030775	CG9673	CG9673	CG9673	32649	4252 // serine-type endopeptidase activity // non-traceable author statement /// 4263 // chymotrypsin activity // inferred from electronic annotation /// 4295 // trypsin activity // inferred from electronic annotation /// 4252 // serine-type endopeptidase activity // inferred from electronic annotation	6508 // proteolysis // inferred from electronic annotation	---	IPR001254 // Peptidase S1, chymotrypsin // 1.5E-54
1692	142891_at	-0.604083	0.823076	-10.6508	5.84617e-12	1.4319e-10	17.0894	FBgn0031097	CG17052	CG17052	CG17052	33022	8061 // chitin binding // inferred from electronic annotation /// 16490 // structural constituent of peritrophic membrane (sensu Insecta) // inferred from sequence or structural similarity /// 16490 // structural constituent of peritrophic membrane (sensu Insecta) // inferred from sequence similarity	6030 // chitin metabolism // inferred from electronic annotation	5576 // extracellular region // inferred from electronic annotation	IPR002557 // Chitin binding Peritrophin-A // 7.6E-17 /// IPR002557 // Chitin binding Peritrophin-A // 4.0E-17 /// IPR002557 // Chitin binding Peritrophin-A // 2.7E-13
12080	153279_at	-1.07579	2.82729	-10.6291	6.14978e-12	1.49841e-10	17.0382	FBgn0021795	CG9035	Tap	Translocon-associated protein	45680	5048 // signal sequence binding // inferred from sequence or structural similarity /// 5515 // protein binding // inferred from physical interaction /// 5048 // signal sequence binding // inferred from sequence similarity	6621 // protein retention in ER // inferred from sequence or structural similarity /// 6621 // protein retention in ER // inferred from sequence similarity	5784 // translocon complex // inferred from sequence or structural similarity /// 5786 // signal recognition particle (sensu Eukaryota) // inferred from sequence or structural similarity /// 16021 // integral to membrane // inferred from electronic annotation /// 5783 // endoplasmic reticulum // inferred from electronic annotation /// 5784 // translocon complex // inferred from sequence similarit…	IPR008855 // Translocon-associated // 2.6E-112
128	141327_at	-0.881402	0.825292	-10.6177	6.31661e-12	1.53443e-10	17.0112	FBgn0038135	CG8773	CG8773	CG8773	41634	4179 // membrane alanyl aminopeptidase activity // inferred from electronic annotation /// 4230 // glutamyl aminopeptidase activity // inferred from sequence or structural similarity /// 8270 // zinc ion binding // inferred from electronic annotation /// 4230 // glutamyl aminopeptidase activity // inferred from sequence similarity	6508 // proteolysis // inferred from electronic annotation	---	IPR001930 // Peptidase M1, membrane alanine aminopeptidase // 1.0E-126
4312	145511_at	-1.21796	4.73068	-10.6175	6.31953e-12	1.53443e-10	17.0107	FBgn0025683	CG3164	CG3164	CG3164	33171	166 // nucleotide binding // inferred from electronic annotation /// 5215 // transporter activity // inferred from sequence or structural similarity /// 5524 // ATP binding // inferred from electronic annotation /// 42626 // ATPase activity, coupled to transmembrane movement of substances // inferred from sequence or structural similarity /// 16887 // ATPase activity // inferred from electronic a…	6629 // lipid metabolism // inferred from electronic annotation /// 6869 // lipid transport // inferred from electronic annotation	43190 // ATP-binding cassette (ABC) transporter complex // inferred from sequence or structural similarity /// 43190 // ATP-binding cassette (ABC) transporter complex // inferred from sequence similarity	IPR003439 // ABC transporter // 3.1E-37 /// IPR003439 // ABC transporter // 1.4E-18 /// IPR003439 // ABC transporter // 3.1E-37
1151	142350_at	-0.906582	1.31493	-10.5905	6.73017e-12	1.6201e-10	16.9471	FBgn0038105	CG8063	yellow-f2	yellow-f2	41596	4167 // dopachrome isomerase activity // inferred from direct assay /// 5102 // receptor binding // inferred from electronic annotation /// 5198 // structural molecule activity // inferred from electronic annotation /// 16860 // intramolecular oxidoreductase activity // inferred from direct assay	2165 // larval or pupal development (sensu Insecta) // inferred from expression pattern /// 6583 // melanin biosynthesis from tyrosine // traceable author statement /// 7398 // ectoderm development // inferred from electronic annotation /// 42435 // indole derivative biosynthesis // inferred from direct assay /// 48066 // pigmentation during development // traceable author statement	5576 // extracellular region // inferred from direct assay /// 5576 // extracellular region // inferred from sequence or structural similarity /// 5576 // extracellular region // inferred from sequence similarity	IPR003534 // Major royal jelly protein // 1.0E-126
4596	145795_at	-2.38523	3.11998	-10.5886	6.76065e-12	1.62464e-10	16.9425	FBgn0031653	CG8871	Jon25Biii	Jonah 25Biii	33706	4263 // chymotrypsin activity // inferred from electronic annotation /// 4295 // trypsin activity // inferred from electronic annotation /// 8236 // serine-type peptidase activity // inferred from electronic annotation /// 42708 // elastase activity // non-traceable author statement /// 4252 // serine-type endopeptidase activity // inferred from electronic annotation /// 8233 // peptidase activit…	6508 // proteolysis // non-traceable author statement /// 6508 // proteolysis // inferred from electronic annotation	---	IPR001254 // Peptidase S1, chymotrypsin // 1.0E-43
3630	144829_at	-0.767991	2.61325	-10.5737	7.00019e-12	1.67933e-10	16.9074	FBgn0030237	CG15209	CG15209	CG15209	32011	5515 // protein binding // inferred from physical interaction	---	---	---
369	141568_at	-1.14202	2.75306	-10.5444	7.49735e-12	1.79246e-10	16.838	FBgn0030362	CG1803	regucalcin	regucalcin	32165	5515 // protein binding // inferred from physical interaction /// 4801 // transaldolase activity // inferred from electronic annotation /// 16740 // transferase activity // inferred from electronic annotation	9948 // anterior/posterior axis specification // inferred from electronic annotation /// 19722 // calcium-mediated signaling // inferred from electronic annotation /// 5975 // carbohydrate metabolism // inferred from electronic annotation /// 6098 // pentose-phosphate shunt // inferred from electronic annotation	5737 // cytoplasm // inferred from electronic annotation	IPR005511 // Senescence marker protein-30 (SMP-30) // 1.0E-126 /// IPR005511 // Senescence marker protein-30 (SMP-30) // 1.0E-126
2677	143876_at	-1.21342	2.04425	-10.5389	7.59505e-12	1.81272e-10	16.825	FBgn0016675	CG9976	Lectin-galC1	Galactose-specific C-type lectin	35216	4872 // receptor activity // traceable author statement /// 5529 // sugar binding // non-traceable author statement /// 5534 // galactose binding // inferred from direct assay /// 5534 // galactose binding // non-traceable author statement /// 5515 // protein binding // inferred from physical interaction /// 5529 // sugar binding // inferred from electronic annotation	6952 // defense response // non-traceable author statement	---	IPR001304 // C-type lectin // 3.9E-14
2426	143625_at	-0.858805	3.67157	-10.5347	7.66971e-12	1.82434e-10	16.8151	FBgn0010426	CG8210	Vha14	Vacuolar H<up>+</up> ATPase 14kD subunit	36731	8553 // hydrogen-exporting ATPase activity, phosphorylative mechanism // inferred from sequence or structural similarity /// 8553 // hydrogen-exporting ATPase activity, phosphorylative mechanism // non-traceable author statement /// 46933 // hydrogen-transporting ATP synthase activity, rotational mechanism // inferred from electronic annotation /// 46961 // hydrogen-transporting ATPase activity, …	15986 // ATP synthesis coupled proton transport // inferred from electronic annotation /// 15992 // proton transport // non-traceable author statement /// 6754 // ATP biosynthesis // inferred from electronic annotation /// 6810 // transport // inferred from electronic annotation /// 6811 // ion transport // inferred from electronic annotation /// 15992 // proton transport // inferred from electro…	221 // hydrogen-transporting ATPase V1 domain // inferred from sequence or structural similarity /// 221 // hydrogen-transporting ATPase V1 domain // non-traceable author statement /// 16469 // proton-transporting two-sector ATPase complex // inferred from electronic annotation /// 221 // hydrogen-transporting ATPase V1 domain // inferred from sequence similarity	IPR008218 // Vacuolar H+-transporting two-sector ATPase, F subunit // 2.5E-55
1172	142371_at	-1.18066	1.59098	-10.5271	7.80759e-12	1.85397e-10	16.7971	FBgn0016684	CG10207	NaPi-T	Na<up>+</up>-dependent inorganic phosphate cotransporter	36651	5316 // high affinity inorganic phosphate:sodium symporter activity // inferred from sequence or structural similarity /// 5316 // high affinity inorganic phosphate:sodium symporter activity // non-traceable author statement /// 15114 // phosphate transporter activity // inferred from electronic annotation /// 5515 // protein binding // inferred from physical interaction /// 5215 // transporter a…	6796 // phosphate metabolism // inferred from electronic annotation /// 6812 // cation transport // inferred from electronic annotation /// 6817 // phosphate transport // inferred from electronic annotation /// 6858 // extracellular transport // inferred from electronic annotation /// 6810 // transport // inferred from electronic annotation /// 6814 // sodium ion transport // inferred from electr…	16021 // integral to membrane // inferred from electronic annotation /// 16020 // membrane // inferred from electronic annotation	---
2711	143910_at	-1.07756	2.24751	-10.5062	8.20023e-12	1.93732e-10	16.7475	FBgn0020224	CG7037	Cbl	Cbl	38961	4842 // ubiquitin-protein ligase activity // inferred from electronic annotation /// 4871 // signal transducer activity // inferred from electronic annotation /// 8270 // zinc ion binding // inferred from electronic annotation /// 16874 // ligase activity // inferred from electronic annotation /// 16874 // ligase activity // traceable author statement /// 5509 // calcium ion binding // inferred f…	6508 // proteolysis // traceable author statement /// 6968 // cellular defense response // inferred from electronic annotation /// 7173 // epidermal growth factor receptor signaling pathway // traceable author statement /// 7175 // negative regulation of epidermal growth factor receptor activity // inferred from mutant phenotype /// 7175 // negative regulation of epidermal growth factor receptor …	151 // ubiquitin ligase complex // inferred from electronic annotation /// 5634 // nucleus // inferred from electronic annotation	IPR003153 // Adaptor protein Cbl, N-terminal // 2.2E-106 /// IPR003153 // Adaptor protein Cbl, N-terminal // 2.0E-70 /// IPR001841 // Zn-finger, RING // 1.5E-15 /// IPR003153 // Adaptor protein Cbl, N-terminal // 8.8E-67
2784	143983_r_at	-1.74529	5.17275	-10.4913	8.49376e-12	1.98993e-10	16.712	---	CG15841 /// CG6555	---	---	---	5179 // hormone activity // non-traceable author statement	7610 // behavior // inferred from electronic annotation /// 45434 // negative regulation of female receptivity, post-mating // non-traceable author statement	5576 // extracellular region // traceable author statement	---
6958	148157_at	-0.775825	0.480839	-10.4753	8.81977e-12	2.05942e-10	16.6739	FBgn0035513	CG1259	CG1259	CG1259	38511	8010 // structural constituent of larval cuticle (sensu Insecta) // inferred from sequence or structural similarity /// 5515 // protein binding // inferred from physical interaction /// 42302 // structural constituent of cuticle // inferred from electronic annotation /// 8010 // structural constituent of larval cuticle (sensu Insecta) // inferred from sequence similarity	---	---	IPR000618 // Insect cuticle protein // 1.8E-28
2076	143275_at	-1.39582	6.05744	-10.4717	8.89379e-12	2.07324e-10	16.6655	FBgn0002863	CG17924	Acp95EF	Accessory gland-specific peptide 95EF	47852	---	---	5576 // extracellular region // non-traceable author statement	---
2473	143672_at	-1.21108	5.76972	-10.4377	9.63539e-12	2.23496e-10	16.5845	FBgn0011669	CG5016	Mst57Db	Male-specific RNA 57Db	43122	4418 // hydroxymethylbilane synthase activity // inferred from electronic annotation	18991 // oviposition // non-traceable author statement /// 45297 // post-mating behavior // non-traceable author statement /// 6779 // porphyrin biosynthesis // inferred from electronic annotation	5576 // extracellular region // non-traceable author statement	---
8900	150099_at	-0.739569	-0.103995	-10.4354	9.68881e-12	2.24013e-10	16.579	FBgn0038544	CG14318	CG14318	CG14318	42138	---	---	---	---
12291	153490_at	-1.39151	3.88431	-10.4352	9.69154e-12	2.24013e-10	16.5787	FBgn0032884	CG9324	Pomp	Pomp	35342	5515 // protein binding // inferred from physical interaction	6508 // proteolysis // inferred from mutant phenotype	502 // proteasome complex (sensu Eukaryota) // non-traceable author statement	IPR008012 // Proteasome maturation factor UMP1 // 2.9E-71
3107	144306_at	-0.641952	1.52357	-10.4282	9.85472e-12	2.2708e-10	16.5618	FBgn0028915	CG7532	CG7532	CG7532	34838	4252 // serine-type endopeptidase activity // inferred from sequence or structural similarity /// 4252 // serine-type endopeptidase activity // inferred from sequence similarity	---	---	IPR002861 // Reeler region // 8.5E-11
9513	150712_at	-0.889531	1.40243	-10.3989	1.05596e-11	2.42128e-10	16.492	FBgn0039486	CG6074	CG6074	CG6074	43264	4089 // carbonate dehydratase activity // inferred from sequence or structural similarity /// 8270 // zinc ion binding // inferred from electronic annotation /// 4089 // carbonate dehydratase activity // inferred from electronic annotation /// 4089 // carbonate dehydratase activity // inferred from sequence similarity	6730 // one-carbon compound metabolism // inferred from electronic annotation	---	IPR001148 // Carbonic anhydrase, eukaryotic // 3.8E-49 /// IPR001148 // Carbonic anhydrase, eukaryotic // 1.3E-49
9680	150879_at	-1.0769	2.40793	-10.3915	1.0747e-11	2.46023e-10	16.4742	FBgn0039755	CG15531	CG15531	CG15531	43592	4768 // stearoyl-CoA 9-desaturase activity // inferred from sequence or structural similarity /// 5506 // iron ion binding // inferred from electronic annotation /// 4768 // stearoyl-CoA 9-desaturase activity // inferred from electronic annotation /// 16491 // oxidoreductase activity // inferred from electronic annotation /// 16717 // oxidoreductase activity, acting on paired donors, with oxidati…	6631 // fatty acid metabolism // inferred from electronic annotation /// 6633 // fatty acid biosynthesis // inferred from electronic annotation /// 8610 // lipid biosynthesis // inferred from electronic annotation	5783 // endoplasmic reticulum // inferred from electronic annotation /// 16020 // membrane // inferred from electronic annotation /// 16021 // integral to membrane // inferred from electronic annotation	IPR005804 // Fatty acid desaturase // 5.4E-23
2866	144065_at	-0.60104	1.45183	-10.3641	1.14647e-11	2.61596e-10	16.4089	FBgn0025469	CG8717	slv	saliva	35773	5515 // protein binding // inferred from physical interaction	---	16020 // membrane // inferred from electronic annotation	IPR004316 // MtN3 and saliva related transmembrane protein // 3.1E-36 /// IPR004316 // MtN3 and saliva related transmembrane protein // 2.3E-38
11509	152708_at	-1.08393	1.4757	-10.3515	1.18118e-11	2.68205e-10	16.3788	FBgn0029167	CG7002	Hml	Hemolectin	39529	5198 // structural molecule activity // inferred from electronic annotation /// 5529 // sugar binding // inferred from sequence or structural similarity /// 8061 // chitin binding // inferred from electronic annotation /// 5529 // sugar binding // inferred from sequence similarity	6030 // chitin metabolism // inferred from electronic annotation /// 6952 // defense response // non-traceable author statement /// 7155 // cell adhesion // inferred from electronic annotation /// 7599 // hemostasis // inferred from mutant phenotype /// 7599 // hemostasis // inferred from sequence or structural similarity /// 7599 // hemostasis // inferred from sequence similarity	5576 // extracellular region // inferred from sequence or structural similarity /// 5576 // extracellular region // inferred from electronic annotation /// 5576 // extracellular region // inferred from sequence similarity	IPR006209 // EGF-like domain // 4.7E-6 /// IPR002919 // Trypsin inhibitor-like, cysteine-rich TIL region // 8.9E-14 /// IPR002919 // Trypsin inhibitor-like, cysteine-rich TIL region // 1.4E-7 /// IPR002919 // Trypsin inhibitor-like, cysteine-rich TIL region // 1.9E-9 /// IPR000421 // Coagulation factor 5/8 type C domain (FA58C) // 6.0E-58 /// IPR000421 // Coagulation factor 5/8 type C domain (FA5…
7435	148634_at	-1.0451	3.29598	-10.3494	1.18729e-11	2.69157e-10	16.3736	FBgn0011455 /// FBgn0067956	CG9762	l(3)neo18 /// Dyakl(3)neo18	lethal (3) neo18 /// lethal (3) neo18	46260	3954 // NADH dehydrogenase activity // inferred from sequence or structural similarity /// 8137 // NADH dehydrogenase (ubiquinone) activity // inferred from sequence or structural similarity /// 3954 // NADH dehydrogenase activity // inferred from sequence similarity /// 8137 // NADH dehydrogenase (ubiquinone) activity // inferred from sequence similarity	6120 // mitochondrial electron transport, NADH to ubiquinone // inferred from sequence or structural similarity /// 6120 // mitochondrial electron transport, NADH to ubiquinone // inferred from sequence similarity	5747 // respiratory chain complex I (sensu Eukaryota) // inferred from sequence or structural similarity /// 5747 // respiratory chain complex I (sensu Eukaryota) // inferred from sequence similarity	---
4967	146166_at	-0.927084	1.79497	-10.3388	1.21739e-11	2.75534e-10	16.3483	FBgn0032265	CG18301	CG18301	CG18301	34451	16298 // lipase activity // inferred from electronic annotation /// 16787 // hydrolase activity // inferred from electronic annotation /// 5515 // protein binding // inferred from physical interaction /// 3824 // catalytic activity // inferred from electronic annotation /// 16789 // carboxylic ester hydrolase activity // inferred from electronic annotation	6629 // lipid metabolism // inferred from electronic annotation /// 16042 // lipid catabolism // inferred from electronic annotation	---	IPR000073 // Alpha/beta hydrolase fold // 1.5E-13 /// IPR006693 // Ab-hydrolase associated lipase region // 2.9E-30
12172	153371_at	-0.802653	2.33869	-10.3218	1.26755e-11	2.85045e-10	16.3075	FBgn0023540	CG3630	CG3630	CG3630	31189	5515 // protein binding // inferred from physical interaction	---	---	---
10620	151819_at	-0.719594	2.05454	-10.3133	1.29339e-11	2.90391e-10	16.2871	FBgn0038878	CG3301	CG3301	CG3301	42528	16616 // oxidoreductase activity, acting on the CH-OH group of donors, NAD or NADP as acceptor // inferred from sequence or structural similarity /// 42802 // identical protein binding // inferred from physical interaction /// 16491 // oxidoreductase activity // inferred from electronic annotation /// 16616 // oxidoreductase activity, acting on the CH-OH group of donors, NAD or NADP as acceptor /…	8152 // metabolism // inferred from electronic annotation	---	IPR002198 // Short-chain dehydrogenase/reductase SDR // 3.2E-36
11090	152289_at	-0.673157	0.757498	-10.3035	1.32372e-11	2.96725e-10	16.2637	FBgn0030148	CG3106	CG3106	CG3106	31909	16747 // transferase activity, transferring groups other than amino-acyl groups // inferred from electronic annotation	---	---	IPR002656 // Acyltransferase 3 family // 5.1E-7
4832	146031_at	-0.999881	3.39979	-10.2998	1.3355e-11	2.98887e-10	16.2547	FBgn0040098	CG17799	lectin-29Ca	lectin-29Ca	53547	5534 // galactose binding // inferred from sequence or structural similarity /// 5534 // galactose binding // inferred from sequence similarity	7283 // spermatogenesis // inferred from electronic annotation	---	IPR001304 // C-type lectin // 3.9E-5
195	141394_at	-0.674493	1.93436	-10.289	1.37014e-11	3.05664e-10	16.2288	FBgn0035656	CG10479	CG10479	CG10479	38674	---	7242 // intracellular signaling cascade // inferred from electronic annotation	---	IPR000980 // SH2 motif // 6.2E-11
3012	144211_at	-1.21911	6.81061	-10.2894	1.369e-11	3.05664e-10	16.2297	FBgn0028415	CG18064	Met75Cb	Met75Cb	44481	---	---	---	---
3939	145138_at	-1.4206	0.144207	-10.2739	1.42033e-11	3.15777e-10	16.1925	FBgn0030666	CG12708	CG12708	CG12708	32502	5515 // protein binding // inferred from physical interaction	---	---	---
5633	146832_at	-1.2601	1.56196	-10.2733	1.42224e-11	3.15777e-10	16.1911	FBgn0043575	CG14745	PGRP-SC2	PGRP-SC2	35862	8745 // N-acetylmuramoyl-L-alanine amidase activity // inferred from electronic annotation /// 42834 // peptidoglycan binding // inferred from sequence or structural similarity /// 42834 // peptidoglycan binding // non-traceable author statement /// 42834 // peptidoglycan binding // inferred from sequence similarity	6952 // defense response // non-traceable author statement /// 6955 // immune response // inferred from sequence or structural similarity /// 9253 // peptidoglycan catabolism // inferred from electronic annotation /// 9253 // peptidoglycan catabolism // inferred from sequence or structural similarity /// 45087 // innate immune response // inferred from sequence or structural similarity /// 6955 /…	5576 // extracellular region // inferred from sequence or structural similarity /// 5887 // integral to plasma membrane // non-traceable author statement /// 5576 // extracellular region // inferred from sequence similarity	IPR002502 // N-acetylmuramoyl-L-alanine amidase, family 2 // 5.6E-65
9987	151186_at	-0.684535	0.516097	-10.2624	1.45971e-11	3.23074e-10	16.1648	FBgn0051774	CG31774	fred	friend of echinoid	33613	5515 // protein binding // inferred from electronic annotation	1745 // compound eye morphogenesis (sensu Endopterygota) // inferred from mutant phenotype /// 7398 // ectoderm development // inferred from electronic annotation /// 7423 // sensory organ development // inferred from mutant phenotype /// 16337 // cell-cell adhesion // inferred from electronic annotation /// 35018 // adult cuticle pattern formation (sensu Insecta) // inferred from mutant phenotyp…	16020 // membrane // inferred from electronic annotation	IPR003961 // Fibronectin, type III // 4.1E-6 /// IPR003961 // Fibronectin, type III // 1.4E-4 /// IPR007110 // Immunoglobulin-like // 3.7E-10 /// IPR007110 // Immunoglobulin-like // 9.9E-6 /// IPR007110 // Immunoglobulin-like // 5.8E-8 /// IPR007110 // Immunoglobulin-like // 3.5E-4 /// IPR007110 // Immunoglobulin-like // 0.42 /// IPR007110 // Immunoglobulin-like // 6.7E-6
559	141758_at	-0.940803	3.54992	-10.2581	1.47478e-11	3.25894e-10	16.1545	FBgn0035471	CG10849	Sc2	Sc2	38457	---	6464 // protein modification // inferred from electronic annotation	16021 // integral to membrane // inferred from electronic annotation	IPR001104 // 3-oxo-5-alpha-steroid 4-dehydrogenase, C-terminal // 9.6E-32
9297	150496_at	-0.787926	2.53042	-10.2532	1.49206e-11	3.2816e-10	16.1427	FBgn0039172	CG5677	CG5677	CG5677	42885	9003 // signal peptidase activity // inferred from sequence or structural similarity /// 9003 // signal peptidase activity // non-traceable author statement /// 8233 // peptidase activity // inferred from electronic annotation /// 9003 // signal peptidase activity // inferred from electronic annotation /// 16787 // hydrolase activity // inferred from electronic annotation /// 9003 // signal pepti…	6465 // signal peptide processing // inferred from sequence or structural similarity /// 6465 // signal peptide processing // non-traceable author statement /// 6508 // proteolysis // inferred from electronic annotation /// 6465 // signal peptide processing // inferred from electronic annotation /// 6465 // signal peptide processing // inferred from sequence similarity	5787 // signal peptidase complex // inferred from sequence or structural similarity /// 5787 // signal peptidase complex // non-traceable author statement /// 16021 // integral to membrane // inferred from electronic annotation /// 5783 // endoplasmic reticulum // inferred from electronic annotation /// 5787 // signal peptidase complex // inferred from electronic annotation /// 5792 // microsome …	IPR007653 // Signal peptidase 22 kDa subunit // 5.2E-115
9784	150983_at	-0.812072	2.236	-10.2537	1.49011e-11	3.2816e-10	16.144	FBgn0039914	CG1901	mav	maverick	43804	5160 // transforming growth factor beta receptor binding // inferred from sequence or structural similarity /// 5160 // transforming growth factor beta receptor binding // non-traceable author statement /// 8083 // growth factor activity // inferred from electronic annotation /// 5515 // protein binding // inferred from physical interaction /// 5160 // transforming growth factor beta receptor bin…	7179 // transforming growth factor beta receptor signaling pathway // inferred from sequence or structural similarity /// 40007 // growth // inferred from electronic annotation /// 50875 // cellular physiological process // inferred from electronic annotation /// 7179 // transforming growth factor beta receptor signaling pathway // inferred from sequence similarity	---	IPR001839 // Transforming growth factor beta // 1.0E-13 /// IPR001111 // Transforming growth factor beta (TGFb), N-terminal // 2.5E-8 /// IPR001839 // Transforming growth factor beta // 1.0E-13 /// IPR001111 // Transforming growth factor beta (TGFb), N-terminal // 2.5E-8
11618	152817_at	-1.54744	3.8207	-10.2533	1.49148e-11	3.2816e-10	16.1431	FBgn0033446	CG1648	CG1648	CG1648	36009	5515 // protein binding // inferred from physical interaction	---	---	---
27	141226_at	-1.33004	2.50009	-10.2492	1.50629e-11	3.30769e-10	16.1331	FBgn0038293	CG6904	CG6904	CG6904	41823	4373 // glycogen (starch) synthase activity // non-traceable author statement /// 5515 // protein binding // inferred from physical interaction /// 4373 // glycogen (starch) synthase activity // inferred from electronic annotation /// 16740 // transferase activity // inferred from electronic annotation /// 16757 // transferase activity, transferring glycosyl groups // inferred from electronic ann…	5978 // glycogen biosynthesis // non-traceable author statement /// 5978 // glycogen biosynthesis // inferred from electronic annotation	---	IPR008631 // Glycogen synthase // 1.0E-126 /// IPR008631 // Glycogen synthase // 1.0E-126
13150	154349_at	-0.720532	2.51988	-10.2432	1.52801e-11	3.35015e-10	16.1186	FBgn0031478	CG8814	CG8814	CG8814	33492	62 // acyl-CoA binding // inferred from sequence or structural similarity /// 4857 // enzyme inhibitor activity // inferred from sequence or structural similarity /// 50809 // diazepam binding // inferred from sequence or structural similarity /// 5515 // protein binding // inferred from physical interaction /// 62 // acyl-CoA binding // inferred from electronic annotation /// 62 // acyl-CoA bind…	42049 // cell acyl-CoA homeostasis // inferred from sequence or structural similarity /// 42049 // cell acyl-CoA homeostasis // inferred from sequence similarity	---	IPR000582 // Acyl-coA-binding protein, ACBP // 1.5E-37
915	142114_at	-1.05201	1.16593	-10.2325	1.56756e-11	3.42614e-10	16.0928	---	---	---	---	---	---	---	---	---
948	142147_at	-1.86764	2.73239	-10.2301	1.57631e-11	3.43454e-10	16.0872	FBgn0032068	CG9466	CG9466	CG9466	34205	4559 // alpha-mannosidase activity // inferred from sequence or structural similarity /// 16799 // hydrolase activity, hydrolyzing N-glycosyl compounds // inferred from electronic annotation /// 4559 // alpha-mannosidase activity // inferred from electronic annotation /// 15923 // mannosidase activity // inferred from electronic annotation /// 16787 // hydrolase activity // inferred from electron…	5975 // carbohydrate metabolism // inferred from electronic annotation /// 6013 // mannose metabolism // inferred from electronic annotation	5764 // lysosome // inferred from sequence or structural similarity /// 5764 // lysosome // inferred from sequence similarity	IPR000602 // Glycoside hydrolase, family 38 // 1.0E-126
10107	151306_at	-0.845086	2.34611	-10.2146	1.63572e-11	3.55293e-10	16.0498	FBgn0040832	CG8012	CG8012	CG8012	50305	---	---	---	---
3648	144847_at	-0.937595	1.66084	-10.1899	1.73506e-11	3.74549e-10	15.9902	FBgn0030264	CG1961	CG1961	CG1961	32043	8081 // phosphoric diester hydrolase activity // inferred from electronic annotation /// 8253 // 5'-nucleotidase activity // inferred from sequence or structural similarity /// 19204 // nucleotide phosphatase activity // inferred from electronic annotation /// 16787 // hydrolase activity // inferred from electronic annotation /// 8253 // 5'-nucleotidase activity // inferred from sequence similari…	6139 // nucleobase, nucleoside, nucleotide and nucleic acid metabolism // inferred from electronic annotation /// 9166 // nucleotide catabolism // inferred from electronic annotation	---	IPR004843 // Metallo-phosphoesterase // 2.4E-15 /// IPR008334 // 5-Nucleotidase, C-terminal // 6.4E-66
5910	147109_at	-0.745613	0.636081	-10.1884	1.74136e-11	3.74754e-10	15.9866	FBgn0033761	CG8778	CG8778	CG8778	36392	4300 // enoyl-CoA hydratase activity // inferred from sequence or structural similarity /// 16491 // oxidoreductase activity // inferred from electronic annotation /// 17091 // AU-specific RNA binding // inferred from sequence or structural similarity /// 4300 // enoyl-CoA hydratase activity // inferred from sequence similarity /// 17091 // AU-specific RNA binding // inferred from sequence simila…	6635 // fatty acid beta-oxidation // inferred from electronic annotation	---	IPR001753 // Enoyl-CoA hydratase/isomerase // 3.2E-61
10088	151287_at	-2.28229	6.79691	-10.1886	1.74066e-11	3.74754e-10	15.987	FBgn0040813	CG11051	Nplp2	Neuropeptide-like precursor 2	50286	5184 // neuropeptide hormone activity // non-traceable author statement /// 5515 // protein binding // inferred from physical interaction	7218 // neuropeptide signaling pathway // non-traceable author statement /// 7218 // neuropeptide signaling pathway // inferred from electronic annotation	5576 // extracellular region // non-traceable author statement	---
5062	146261_at	-0.611118	0.50179	-10.182	1.76849e-11	3.79427e-10	15.971	FBgn0032386	CG17745	CG17745	CG17745	34606	---	---	---	---
13144	154343_at	-0.737037	2.45465	-10.179	1.78087e-11	3.81498e-10	15.9639	FBgn0030594	CG9509	CG9509	CG9509	32420	8812 // choline dehydrogenase activity // inferred from sequence or structural similarity /// 50660 // FAD binding // inferred from electronic annotation /// 16491 // oxidoreductase activity // inferred from electronic annotation /// 16614 // oxidoreductase activity, acting on CH-OH group of donors // inferred from electronic annotation /// 8812 // choline dehydrogenase activity // inferred from …	6118 // electron transport // inferred from electronic annotation /// 7498 // mesoderm development // inferred from expression pattern	---	IPR000172 // Glucose-methanol-choline oxidoreductase // 2.5E-86 /// IPR007867 // GMC oxidoreductase // 2.5E-35
4438	145637_at	-1.23829	3.39738	-10.1768	1.79065e-11	3.83007e-10	15.9584	FBgn0031418	CG3609	CG3609	CG3609	33421	16491 // oxidoreductase activity // inferred from electronic annotation	6118 // electron transport // inferred from electronic annotation /// 8152 // metabolism // inferred from electronic annotation	---	IPR000683 // Oxidoreductase, N-terminal // 1.2E-30 /// IPR004104 // Oxidoreductase, C-terminal // 1.1E-8
11876	153075_at	-1.24563	0.417267	-10.1532	1.89434e-11	4.03339e-10	15.9015	FBgn0033439	CG1773	CG1773	CG1773	35999	4263 // chymotrypsin activity // inferred from electronic annotation /// 4295 // trypsin activity // inferred from sequence or structural similarity /// 4295 // trypsin activity // non-traceable author statement /// 4252 // serine-type endopeptidase activity // inferred from electronic annotation /// 8233 // peptidase activity // inferred from electronic annotation /// 16787 // hydrolase activity…	6508 // proteolysis // inferred from sequence or structural similarity /// 6508 // proteolysis // non-traceable author statement /// 6508 // proteolysis // inferred from electronic annotation /// 6508 // proteolysis // inferred from sequence similarity	---	IPR001254 // Peptidase S1, chymotrypsin // 5.0E-48
5564	146763_at	-0.548046	0.581296	-10.147	1.92307e-11	4.07597e-10	15.8863	FBgn0033216	CG1946	CG1946	CG1946	35720	---	---	---	IPR007130 // Diacylglycerol acyltransferase // 1.0E-126
8841	150040_at	-0.566346	3.40614	-10.147	1.92268e-11	4.07597e-10	15.8865	FBgn0038462	CG17556	CG17556	CG17556	42046	5488 // binding // inferred from electronic annotation	---	---	---
7236	148435_at	-0.795847	1.73252	-10.1391	1.95968e-11	4.14104e-10	15.8672	FBgn0035944	CG5021	CG5021	CG5021	39025	---	---	16021 // integral to membrane // non-traceable author statement /// 16020 // membrane // inferred from electronic annotation /// 16021 // integral to membrane // inferred from electronic annotation	IPR008564 // Eukaryotic protein of unknown function DUF846 // 5.6E-114 /// IPR008564 // Eukaryotic protein of unknown function DUF846 // 5.6E-114
1000	142199_at	-1.03593	1.92428	-10.1358	1.97528e-11	4.16146e-10	15.8592	FBgn0029608	CG3091	CG3091	CG3091	31210	5386 // carrier activity // inferred from electronic annotation /// 8431 // vitamin E binding // inferred from sequence or structural similarity /// 5215 // transporter activity // inferred from electronic annotation /// 8431 // vitamin E binding // inferred from sequence similarity	6732 // coenzyme metabolism // inferred from electronic annotation /// 6810 // transport // inferred from electronic annotation /// 51189 // prosthetic group metabolism // inferred from electronic annotation	5622 // intracellular // inferred from electronic annotation	IPR001251 // Cellular retinaldehyde-binding)/triple function, C-terminal // 2.1E-14
8378	149577_at	-0.623819	0.525421	-10.1287	2.00883e-11	4.217e-10	15.8422	FBgn0051411	CG31411	CG31411	CG31411	41186	4295 // trypsin activity // non-traceable author statement	6508 // proteolysis // non-traceable author statement	---	---
12199	153398_at	-0.772726	2.02155	-10.1271	2.01683e-11	4.22358e-10	15.8382	FBgn0037228	CG1092	CG1092	CG1092	40538	5515 // protein binding // inferred from physical interaction	---	---	---
13892	155091_at	-0.973384	5.27019	-10.1042	2.13057e-11	4.43525e-10	15.7827	FBgn0015766	CG10596	Msr-110	Msr-110	38629	---	---	---	---
33	141232_at	-0.681822	3.25398	-10.0965	2.17073e-11	4.51215e-10	15.7639	FBgn0038326	CG5044	CG5044	CG5044	41869	3860 // 3-hydroxyisobutyryl-CoA hydrolase activity // inferred from sequence or structural similarity /// 16491 // oxidoreductase activity // inferred from electronic annotation /// 16836 // hydro-lyase activity // inferred from electronic annotation /// 3824 // catalytic activity // inferred from electronic annotation /// 3860 // 3-hydroxyisobutyryl-CoA hydrolase activity // inferred from sequen…	6635 // fatty acid beta-oxidation // inferred from electronic annotation /// 8152 // metabolism // inferred from electronic annotation	---	IPR001753 // Enoyl-CoA hydratase/isomerase // 4.0E-22 /// IPR001753 // Enoyl-CoA hydratase/isomerase // 4.0E-22
9639	150838_at	-0.862769	0.707195	-10.0855	2.22882e-11	4.61237e-10	15.7372	FBgn0039686	CG15506	CG15506	CG15506	43498	---	---	---	---
2625	143824_at	-0.942038	2.1661	-10.0718	2.30336e-11	4.75259e-10	15.704	FBgn0015583	CG17797	Acp29AB	Accessory gland-specific peptide 29AB	34162	5179 // hormone activity // non-traceable author statement /// 5529 // sugar binding // inferred from sequence or structural similarity /// 5534 // galactose binding // inferred from sequence or structural similarity /// 5515 // protein binding // inferred from physical interaction /// 5529 // sugar binding // inferred from electronic annotation /// 5529 // sugar binding // inferred from sequence…	7283 // spermatogenesis // inferred from electronic annotation /// 7321 // sperm displacement // non-traceable author statement /// 7582 // physiological process // non-traceable author statement /// 45297 // post-mating behavior // non-traceable author statement /// 46692 // sperm competition // traceable author statement /// 7610 // behavior // inferred from electronic annotation	5576 // extracellular region // non-traceable author statement	IPR001304 // C-type lectin // 1.8E-9
13166	154365_at	-0.691622	0.894084	-10.0445	2.45975e-11	5.06037e-10	15.6376	FBgn0039733	CG11504	CG11504	CG11504	43557	---	---	---	---
12843	154042_at	-0.938409	3.78012	-10.0268	2.56676e-11	5.25736e-10	15.5945	FBgn0027835	CG5170	Dp1	Dodeca-satellite-binding protein 1	37116	3696 // satellite DNA binding // inferred from direct assay /// 3697 // single-stranded DNA binding // inferred from direct assay /// 3697 // single-stranded DNA binding // traceable author statement /// 3676 // nucleic acid binding // inferred from electronic annotation	7059 // chromosome segregation // inferred from mutant phenotype /// 30261 // chromosome condensation // inferred from mutant phenotype	792 // heterochromatin // inferred from direct assay /// 5634 // nucleus // inferred from direct assay /// 5701 // polytene chromosome chromocenter // inferred from direct assay	IPR004087 // KH // 5.6E-10 /// IPR004087 // KH // 5.0E-9 /// IPR004087 // KH // 3.9E-11 /// IPR004087 // KH // 1.7E-8 /// IPR004087 // KH // 2.2E-7 /// IPR004087 // KH // 9.2E-16 /// IPR004087 // KH // 4.0E-13 /// IPR004087 // KH // 2.5E-13 /// IPR004087 // KH // 8.5E-9 /// IPR004087 // KH // 2.0E-12 /// IPR004087 // KH // 1.8E-5
8881	150080_at	-1.20708	1.50223	-10.0179	2.62289e-11	5.34699e-10	15.5727	FBgn0038516	CG5840	CG5840	CG5840	42106	4735 // pyrroline-5-carboxylate reductase activity // inferred from sequence or structural similarity /// 5515 // protein binding // inferred from physical interaction /// 42802 // identical protein binding // inferred from physical interaction /// 4735 // pyrroline-5-carboxylate reductase activity // inferred from electronic annotation /// 16491 // oxidoreductase activity // inferred from electr…	6561 // proline biosynthesis // inferred from electronic annotation /// 8652 // amino acid biosynthesis // inferred from electronic annotation /// 6118 // electron transport // inferred from electronic annotation	---	IPR000304 // Delta 1-pyrroline-5-carboxylate reductase // 4.9E-97 /// IPR000304 // Delta 1-pyrroline-5-carboxylate reductase // 2.3E-67
11394	152593_at	-0.9756	2.30536	-10.0171	2.62773e-11	5.34699e-10	15.5708	FBgn0038938	CG7084	CG7084	CG7084	42606	8513 // organic cation porter activity // inferred from sequence or structural similarity /// 15144 // carbohydrate transporter activity // inferred from electronic annotation /// 8513 // organic cation porter activity // inferred from sequence similarity	6812 // cation transport // inferred from electronic annotation /// 6858 // extracellular transport // inferred from electronic annotation	---	IPR005828 // General substrate transporter // 1.5E-4
1482	142681_at	-1.18625	2.33027	-10.0097	2.6752e-11	5.41611e-10	15.5527	FBgn0024315	CG8098	Picot	Picot	36865	5316 // high affinity inorganic phosphate:sodium symporter activity // inferred from sequence or structural similarity /// 5316 // high affinity inorganic phosphate:sodium symporter activity // non-traceable author statement /// 15114 // phosphate transporter activity // inferred from electronic annotation /// 5515 // protein binding // inferred from physical interaction /// 5215 // transporter a…	6796 // phosphate metabolism // inferred from electronic annotation /// 6812 // cation transport // inferred from electronic annotation /// 6817 // phosphate transport // non-traceable author statement /// 6858 // extracellular transport // inferred from electronic annotation /// 6810 // transport // inferred from electronic annotation /// 6811 // ion transport // inferred from electronic annotat…	16021 // integral to membrane // non-traceable author statement /// 16020 // membrane // inferred from electronic annotation /// 16021 // integral to membrane // inferred from electronic annotation	---
4622	145821_at	-1.23323	2.04199	-10.0102	2.67194e-11	5.41611e-10	15.554	FBgn0031703	CG12512	CG12512	CG12512	33766	4467 // long-chain-fatty-acid-CoA ligase activity // inferred from sequence or structural similarity /// 4467 // long-chain-fatty-acid-CoA ligase activity // inferred from sequence similarity	6631 // fatty acid metabolism // inferred from electronic annotation	---	IPR000873 // AMP-dependent synthetase and ligase // 4.6E-112
940	142139_at	-1.61345	2.89332	-9.98922	2.81066e-11	5.68216e-10	15.5028	FBgn0040349	CG3699	CG3699	CG3699	31046	16614 // oxidoreductase activity, acting on CH-OH group of donors // inferred from sequence or structural similarity /// 16491 // oxidoreductase activity // inferred from electronic annotation /// 16614 // oxidoreductase activity, acting on CH-OH group of donors // inferred from sequence similarity	8152 // metabolism // inferred from electronic annotation	---	IPR002198 // Short-chain dehydrogenase/reductase SDR // 4.1E-83
13582	154781_at	-0.773561	1.57245	-9.97842	2.88499e-11	5.82401e-10	15.4765	FBgn0043792	CG30427	CG30427	CG30427	37986	16491 // oxidoreductase activity // inferred from electronic annotation	---	---	IPR004262 // Male sterility protein // 5.6E-100
3868	145067_at	-0.960407	0.11912	-9.97742	2.89196e-11	5.8297e-10	15.474	FBgn0052600	CG32600	dpr8	dpr8	32387	---	7275 // development // inferred from electronic annotation	5727 // extrachromosomal circular DNA // inferred from electronic annotation /// 16020 // membrane // inferred from electronic annotation /// 16021 // integral to membrane // inferred from electronic annotation	IPR007110 // Immunoglobulin-like // 2.0E-5 /// IPR007110 // Immunoglobulin-like // 2.1E-7
13192	154391_at	-0.584588	1.99712	-9.96457	2.98322e-11	5.99639e-10	15.4426	FBgn0033635	CG7777	CG7777	CG7777	36237	5372 // water transporter activity // inferred from sequence or structural similarity /// 5386 // carrier activity // inferred from electronic annotation /// 5488 // binding // inferred from electronic annotation /// 5215 // transporter activity // inferred from electronic annotation /// 5372 // water transporter activity // inferred from sequence similarity	6810 // transport // inferred from electronic annotation /// 19725 // cell homeostasis // inferred from electronic annotation	16020 // membrane // inferred from electronic annotation /// 16021 // integral to membrane // inferred from electronic annotation	IPR000425 // Major intrinsic protein // 1.4E-81
7717	148916_at	-0.711022	0.246058	-9.96118	3.00782e-11	6.03719e-10	15.4343	FBgn0036665	CG13024	CG13024	CG13024	39880	---	---	---	---
10442	151641_at	-0.886828	2.62848	-9.94935	3.0952e-11	6.19483e-10	15.4054	FBgn0051673	CG31673	CG31673	CG31673	35348	30267 // glyoxylate reductase (NADP) activity // inferred from sequence or structural similarity /// 16616 // oxidoreductase activity, acting on the CH-OH group of donors, NAD or NADP as acceptor // inferred from electronic annotation /// 51287 // NAD binding // inferred from electronic annotation /// 30267 // glyoxylate reductase (NADP) activity // inferred from sequence similarity	5975 // carbohydrate metabolism // inferred from electronic annotation /// 6564 // L-serine biosynthesis // inferred from electronic annotation /// 8652 // amino acid biosynthesis // inferred from electronic annotation /// 8152 // metabolism // inferred from electronic annotation	---	IPR006140 // D-isomer specific 2-hydroxyacid dehydrogenase, NAD binding domain // 1.0E-57 /// IPR006139 // D-isomer specific 2-hydroxyacid dehydrogenase, catalytic domain // 6.0E-21
11452	152651_at	-0.743908	1.08687	-9.9442	3.13405e-11	6.26362e-10	15.3928	FBgn0039184	CG6432	CG6432	CG6432	42901	3987 // acetate-CoA ligase activity // inferred from sequence or structural similarity /// 3824 // catalytic activity // inferred from electronic annotation /// 3987 // acetate-CoA ligase activity // inferred from sequence similarity	6631 // fatty acid metabolism // inferred from electronic annotation /// 8152 // metabolism // inferred from electronic annotation	---	IPR000873 // AMP-dependent synthetase and ligase // 7.2E-103
1263	142462_at	-0.703422	2.86899	-9.94046	3.16255e-11	6.3026e-10	15.3836	FBgn0034902	CG5532	CG5532	CG5532	37761	---	---	16020 // membrane // inferred from electronic annotation /// 16021 // integral to membrane // inferred from electronic annotation	IPR005349 // Protein of unknown function UPF0136 // 7.3E-53
6894	148093_at	-0.71903	-0.699282	-9.94055	3.16184e-11	6.3026e-10	15.3839	---	CG32269 /// CG32270	---	---	---	4263 // chymotrypsin activity // inferred from electronic annotation /// 4295 // trypsin activity // inferred from electronic annotation /// 4295 // trypsin activity // non-traceable author statement /// 4252 // serine-type endopeptidase activity // inferred from electronic annotation /// 8233 // peptidase activity // inferred from electronic annotation /// 16787 // hydrolase activity // inferred…	6508 // proteolysis // inferred from electronic annotation /// 6508 // proteolysis // non-traceable author statement	---	---
5327	146526_at	-2.01107	3.91334	-9.92201	3.30713e-11	6.56273e-10	15.3385	FBgn0032836	CG10680	CG10680	CG10680	35282	---	---	---	---
12234	153433_at	-0.91577	3.09084	-9.91972	3.32561e-11	6.58077e-10	15.3328	FBgn0011693	CG4899	Pdh	Photoreceptor dehydrogenase	39812	4022 // alcohol dehydrogenase activity // inferred from electronic annotation /// 16616 // oxidoreductase activity, acting on the CH-OH group of donors, NAD or NADP as acceptor // inferred from sequence or structural similarity /// 5515 // protein binding // inferred from physical interaction /// 3824 // catalytic activity // inferred from electronic annotation /// 16491 // oxidoreductase activit…	6629 // lipid metabolism // inferred from electronic annotation /// 8152 // metabolism // inferred from electronic annotation	---	IPR002198 // Short-chain dehydrogenase/reductase SDR // 6.5E-49 /// IPR002198 // Short-chain dehydrogenase/reductase SDR // 6.5E-47
279	141478_at	-1.01295	5.0896	-9.91755	3.34313e-11	6.6061e-10	15.3275	FBgn0004432	CG9916	Cyp1	Cyclophilin 1	32595	3755 // peptidyl-prolyl cis-trans isomerase activity // inferred from sequence or structural similarity /// 3755 // peptidyl-prolyl cis-trans isomerase activity // non-traceable author statement /// 16538 // cyclin-dependent protein kinase regulator activity // non-traceable author statement /// 3755 // peptidyl-prolyl cis-trans isomerase activity // inferred from electronic annotation /// 16853 …	6457 // protein folding // non-traceable author statement /// 6605 // protein targeting // inferred from electronic annotation /// 6952 // defense response // inferred from electronic annotation /// 35071 // salivary gland cell autophagic cell death // inferred from expression pattern /// 48102 // autophagic cell death // inferred from expression pattern /// 6457 // protein folding // inferred fr…	5737 // cytoplasm // non-traceable author statement /// 5829 // cytosol // inferred from sequence or structural similarity /// 8024 // transcription elongation factor complex b // non-traceable author statement /// 19908 // nuclear cyclin-dependent protein kinase holoenzyme complex // non-traceable author statement /// 5829 // cytosol // inferred from sequence similarity	IPR002130 // Peptidyl-prolyl cis-trans isomerase, cyclophilin type // 8.2E-117 /// IPR002130 // Peptidyl-prolyl cis-trans isomerase, cyclophilin type // 8.2E-117
13027	154226_at	-0.709386	4.15574	-9.91676	3.34955e-11	6.60946e-10	15.3256	FBgn0011760	CG6998	ctp	cut up	31405	3777 // microtubule motor activity // non-traceable author statement /// 5200 // structural constituent of cytoskeleton // inferred from electronic annotation /// 42623 // ATPase activity, coupled // inferred from sequence or structural similarity /// 5515 // protein binding // inferred from physical interaction /// 3774 // motor activity // inferred from electronic annotation /// 3777 // microtu…	6403 // RNA localization // inferred from electronic annotation /// 6886 // intracellular protein transport // inferred from electronic annotation /// 7018 // microtubule-based movement // inferred from sequence or structural similarity /// 7049 // cell cycle // inferred from electronic annotation /// 7283 // spermatogenesis // inferred from mutant phenotype /// 7476 // wing morphogenesis // infe…	5856 // cytoskeleton // non-traceable author statement /// 5868 // cytoplasmic dynein complex // inferred from sequence or structural similarity /// 5868 // cytoplasmic dynein complex // non-traceable author statement /// 30286 // dynein complex // inferred from sequence or structural similarity /// 5874 // microtubule // inferred from electronic annotation /// 5875 // microtubule associated comp…	IPR001372 // Dynein light chain, type 1 // 1.6E-67
13298	154497_at	-0.835426	1.1085	-9.90723	3.42789e-11	6.74505e-10	15.3022	FBgn0035025	CG11416	CG11416	CG11416	37924	5515 // protein binding // inferred from electronic annotation	6457 // protein folding // inferred from electronic annotation	16272 // prefoldin complex // inferred from electronic annotation	IPR004127 // Putative prefoldin chaperone // 3.1E-32
1812	143011_at	-0.882667	3.2537	-9.90276	3.46525e-11	6.79947e-10	15.2913	FBgn0031220	CG4822	CG4822	CG4822	33170	166 // nucleotide binding // inferred from electronic annotation /// 5215 // transporter activity // inferred from sequence or structural similarity /// 5253 // anion channel activity // inferred from electronic annotation /// 5524 // ATP binding // inferred from electronic annotation /// 42626 // ATPase activity, coupled to transmembrane movement of substances // inferred from sequence or struct…	6629 // lipid metabolism // inferred from electronic annotation /// 6820 // anion transport // inferred from electronic annotation /// 6869 // lipid transport // inferred from electronic annotation	43190 // ATP-binding cassette (ABC) transporter complex // inferred from sequence or structural similarity /// 43190 // ATP-binding cassette (ABC) transporter complex // inferred from sequence similarity	IPR003439 // ABC transporter // 1.7E-41
2901	144100_at	-0.819963	2.73546	-9.90096	3.48043e-11	6.8197e-10	15.2869	FBgn0025827	CG6421	CG6421	CG6421	46813	5509 // calcium ion binding // inferred from electronic annotation	6952 // defense response // inferred from electronic annotation /// 42742 // defense response to bacteria // inferred from electronic annotation	---	IPR008597 // Destabilase // 2.0E-78
5287	146486_at	-0.88271	1.22046	-9.89224	3.55494e-11	6.93658e-10	15.2655	FBgn0032770	CG13086	CG13086	CG13086	35208	---	---	---	---
4973	146172_at	-0.992688	0.312243	-9.8855	3.61364e-11	7.03155e-10	15.2489	FBgn0032271	CG7329	CG7329	CG7329	34457	4806 // triacylglycerol lipase activity // inferred from sequence or structural similarity /// 3824 // catalytic activity // inferred from electronic annotation /// 16789 // carboxylic ester hydrolase activity // inferred from electronic annotation /// 4806 // triacylglycerol lipase activity // inferred from sequence similarity	6629 // lipid metabolism // inferred from electronic annotation /// 16042 // lipid catabolism // inferred from electronic annotation	---	IPR000073 // Alpha/beta hydrolase fold // 3.6E-12 /// IPR006693 // Ab-hydrolase associated lipase region // 9.5E-34
9585	150784_at	-0.66236	1.00329	-9.884	3.62685e-11	7.04745e-10	15.2452	FBgn0039598	CG14061	CG14061	CG14061	43396	4252 // serine-type endopeptidase activity // inferred from electronic annotation	6508 // proteolysis // inferred from electronic annotation	---	---
6450	147649_at	-0.669438	0.0929066	-9.88175	3.64671e-11	7.07623e-10	15.2397	FBgn0050405	CG33227	CG33227	CG33227	2768861	---	---	---	IPR000859 // CUB // 4.8E-11
11392	152591_at	-0.866001	2.88818	-9.87518	3.70536e-11	7.17281e-10	15.2236	FBgn0034200	CG11395	CG11395	CG11395	36937	---	---	---	---
2439	143638_at	-0.770881	4.02947	-9.86942	3.75767e-11	7.25138e-10	15.2094	FBgn0011217	CG7425	eff	effete	41785	4840 // ubiquitin conjugating enzyme activity // inferred from genetic interaction /// 4840 // ubiquitin conjugating enzyme activity // inferred from sequence or structural similarity /// 4840 // ubiquitin conjugating enzyme activity // non-traceable author statement /// 4840 // ubiquitin conjugating enzyme activity // traceable author statement /// 5515 // protein binding // inferred from physic…	1745 // compound eye morphogenesis (sensu Endopterygota) // inferred from mutant phenotype /// 6512 // ubiquitin cycle // inferred from genetic interaction /// 6512 // ubiquitin cycle // inferred from sequence or structural similarity /// 7001 // chromosome organization and biogenesis (sensu Eukaryota) // inferred from mutant phenotype /// 7067 // mitosis // inferred from mutant phenotype /// 714…	---	IPR000608 // Ubiquitin-conjugating enzymes // 4.2E-81
5474	146673_at	-1.28697	1.42218	-9.86869	3.76432e-11	7.25421e-10	15.2076	FBgn0033067	CG11211	CG11211	CG11211	35545	5537 // mannose binding // inferred from sequence or structural similarity /// 5529 // sugar binding // inferred from electronic annotation /// 5537 // mannose binding // inferred from sequence similarity	---	---	IPR001304 // C-type lectin // 1.9E-14
11958	153157_at	-0.854713	1.63906	-9.86499	3.79839e-11	7.29979e-10	15.1985	FBgn0037213	CG12581	CG12581	CG12581	40522	---	---	---	---
7945	149144_at	-0.581921	1.54599	-9.86031	3.84186e-11	7.37321e-10	15.187	FBgn0037018	CG4042	CG4042	CG4042	40291	3700 // transcription factor activity // inferred from electronic annotation /// 43565 // sequence-specific DNA binding // inferred from electronic annotation	6355 // regulation of transcription, DNA-dependent // inferred from electronic annotation	5634 // nucleus // inferred from electronic annotation	---
11068	152267_at	-0.767033	1.87001	-9.85858	3.85809e-11	7.39424e-10	15.1828	FBgn0011576	CG3466	Cyp4d2	Cytochrome P450-4d2	31192	4497 // monooxygenase activity // inferred from electronic annotation /// 16491 // oxidoreductase activity // inferred from electronic annotation /// 5506 // iron ion binding // inferred from electronic annotation /// 20037 // heme binding // inferred from electronic annotation /// 46872 // metal ion binding // inferred from electronic annotation	6118 // electron transport // inferred from electronic annotation /// 8202 // steroid metabolism // inferred from electronic annotation	5792 // microsome // non-traceable author statement /// 16020 // membrane // non-traceable author statement /// 5783 // endoplasmic reticulum // inferred from electronic annotation /// 5792 // microsome // inferred from electronic annotation /// 16020 // membrane // inferred from electronic annotation	IPR001128 // Cytochrome P450 // 1.0E-126
13045	154244_at	-0.944013	4.40915	-9.84505	3.98724e-11	7.62091e-10	15.1495	FBgn0001091	CG12055	Gapdh1	Glyceraldehyde 3 phosphate dehydrogenase 1	35728	4365 // glyceraldehyde-3-phosphate dehydrogenase (phosphorylating) activity // inferred from direct assay /// 4365 // glyceraldehyde-3-phosphate dehydrogenase (phosphorylating) activity // inferred from sequence or structural similarity /// 4365 // glyceraldehyde-3-phosphate dehydrogenase (phosphorylating) activity // non-traceable author statement /// 4365 // glyceraldehyde-3-phosphate dehydroge…	6096 // glycolysis // inferred from expression pattern /// 6096 // glycolysis // non-traceable author statement /// 6006 // glucose metabolism // inferred from electronic annotation /// 6096 // glycolysis // inferred from electronic annotation	5737 // cytoplasm // non-traceable author statement	IPR000173 // Glyceraldehyde 3-phosphate dehydrogenase // 2.9E-118 /// IPR000173 // Glyceraldehyde 3-phosphate dehydrogenase // 1.0E-126
5180	146379_at	-0.667599	2.63134	-9.84354	4.00191e-11	7.63851e-10	15.1458	FBgn0040260	CG17932	Ugt36Bc	Ugt36Bc	53511	15020 // glucuronosyltransferase activity // inferred from sequence or structural similarity /// 16758 // transferase activity, transferring hexosyl groups // inferred from electronic annotation /// 15020 // glucuronosyltransferase activity // inferred from sequence similarity	5976 // polysaccharide metabolism // inferred from electronic annotation /// 6952 // defense response // inferred from electronic annotation /// 8202 // steroid metabolism // inferred from electronic annotation /// 9636 // response to toxin // inferred from electronic annotation /// 8152 // metabolism // inferred from electronic annotation	---	IPR002213 // UDP-glucoronosyl/UDP-glucosyl transferase // 2.1E-52
9996	151195_i_at	-0.690449	1.71436	-9.81739	4.26524e-11	8.11142e-10	15.0814	FBgn0040718	CG15353	CG15353	CG15353	50191	---	---	---	---
6558	147757_at	-0.834971	1.39309	-9.81432	4.29728e-11	8.15784e-10	15.0738	FBgn0034837	CG9871	CG9871	CG9871	37684	3676 // nucleic acid binding // inferred from electronic annotation /// 3735 // structural constituent of ribosome // inferred from sequence or structural similarity /// 3735 // structural constituent of ribosome // inferred from electronic annotation /// 3735 // structural constituent of ribosome // inferred from sequence similarity	6412 // protein biosynthesis // inferred from sequence or structural similarity /// 6412 // protein biosynthesis // inferred from electronic annotation /// 6412 // protein biosynthesis // inferred from sequence similarity	5842 // cytosolic large ribosomal subunit (sensu Eukaryota) // inferred from sequence or structural similarity /// 5622 // intracellular // inferred from electronic annotation /// 5840 // ribosome // inferred from electronic annotation /// 5842 // cytosolic large ribosomal subunit (sensu Eukaryota) // inferred from sequence similarity	IPR002671 // Ribosomal L22e protein // 8.1E-44
4760	145959_at	-0.627972	1.36061	-9.79725	4.48004e-11	8.48181e-10	15.0317	FBgn0031918	CG6055	CG6055	CG6055	34027	5529 // sugar binding // inferred from electronic annotation	---	---	---
9638	150837_at	-1.97376	1.20653	-9.79255	4.53177e-11	8.56817e-10	15.0201	FBgn0039685	CG7592	Obp99b	Odorant-binding protein 99b	43497	5549 // odorant binding // inferred from electronic annotation /// 5549 // odorant binding // inferred from sequence or structural similarity /// 5549 // odorant binding // non-traceable author statement /// 5549 // odorant binding // inferred from sequence similarity	6810 // transport // inferred from electronic annotation /// 7606 // sensory perception of chemical stimulus // inferred from sequence or structural similarity /// 19236 // response to pheromone // inferred from sequence or structural similarity /// 35071 // salivary gland cell autophagic cell death // inferred from expression pattern /// 42048 // olfactory behavior // inferred from sequence or s…	5576 // extracellular region // inferred from sequence or structural similarity /// 5576 // extracellular region // inferred from sequence similarity	IPR006170 // Pheromone/general odorant binding protein, PBP/GOBP // 5.8E-31
2472	143671_at	-0.773213	5.90365	-9.79032	4.55653e-11	8.60337e-10	15.0146	FBgn0011668	CG9074	Mst57Da	Male-specific RNA 57Da	47954	5515 // protein binding // inferred from physical interaction	6952 // defense response // inferred from sequence or structural similarity /// 18991 // oviposition // non-traceable author statement /// 45297 // post-mating behavior // non-traceable author statement /// 7610 // behavior // inferred from electronic annotation /// 6952 // defense response // inferred from sequence similarity	5576 // extracellular region // non-traceable author statement	---
12021	153220_at	-0.681566	1.76936	-9.7867	4.59695e-11	8.66801e-10	15.0057	FBgn0025373	CG12389	Fpps	Farnesyl pyrophosphate synthase	36209	4161 // dimethylallyltranstransferase activity // non-traceable author statement /// 4337 // geranyltranstransferase activity // inferred from sequence or structural similarity /// 4337 // geranyltranstransferase activity // non-traceable author statement /// 8415 // acyltransferase activity // inferred from electronic annotation /// 5515 // protein binding // inferred from physical interaction /…	8203 // cholesterol metabolism // inferred from electronic annotation /// 8354 // germ cell migration // inferred from mutant phenotype /// 45337 // farnesyl diphosphate biosynthesis // Unknown /// 8299 // isoprenoid biosynthesis // inferred from electronic annotation /// 45337 // farnesyl diphosphate biosynthesis // inferred from curator	---	IPR000092 // Polyprenyl synthetase // 5.4E-74
2941	144140_at	-1.27231	5.44742	-9.7751	4.72917e-11	8.88146e-10	14.9771	FBgn0026409	CG4994	Mpcp	Mitochondrial phosphate carrier protein	39587	5386 // carrier activity // inferred from sequence or structural similarity /// 5488 // binding // inferred from electronic annotation /// 15114 // phosphate transporter activity // inferred from sequence or structural similarity /// 15114 // phosphate transporter activity // non-traceable author statement /// 5386 // carrier activity // inferred from sequence similarity /// 15114 // phosphate tr…	6796 // phosphate metabolism // inferred from electronic annotation /// 6817 // phosphate transport // inferred from sequence or structural similarity /// 6817 // phosphate transport // non-traceable author statement /// 6810 // transport // inferred from electronic annotation /// 6817 // phosphate transport // inferred from sequence similarity	5739 // mitochondrion // non-traceable author statement /// 5740 // mitochondrial envelope // inferred from sequence or structural similarity /// 5743 // mitochondrial inner membrane // inferred from sequence or structural similarity /// 16020 // membrane // inferred from electronic annotation /// 16021 // integral to membrane // inferred from electronic annotation /// 5740 // mitochondrial envel…	IPR001993 // Mitochondrial substrate carrier // 6.6E-28 /// IPR001993 // Mitochondrial substrate carrier // 1.2E-25 /// IPR001993 // Mitochondrial substrate carrier // 1.9E-10
2079	143278_at	-0.538979	1.04421	-9.77043	4.78347e-11	8.95942e-10	14.9655	---	CG13399 /// CG10890	---	---	---	14 // single-stranded DNA specific endodeoxyribonuclease activity // inferred from sequence or structural similarity /// 3677 // DNA binding // inferred from electronic annotation /// 46982 // protein heterodimerization activity // inferred from physical interaction /// 4518 // nuclease activity // inferred from electronic annotation /// 3697 // single-stranded DNA binding // inferred from electr…	6284 // base-excision repair // inferred from sequence or structural similarity /// 6289 // nucleotide-excision repair // non-traceable author statement /// 42766 // nucleosome mobilization // inferred from direct assay /// 6281 // DNA repair // inferred from electronic annotation /// 6289 // nucleotide-excision repair // inferred from electronic annotation	8623 // chromatin accessibility complex // inferred from direct assay /// 8623 // chromatin accessibility complex // inferred from physical interaction /// 8623 // chromatin accessibility complex // non-traceable author statement /// 8623 // chromatin accessibility complex // traceable author statement /// 5634 // nucleus // inferred from electronic annotation /// 5622 // intracellular // inferre…	IPR006086 // XPG I domain // 1.6E-38 /// IPR003903 // Ubiquitin interacting motif // 0.0033 /// IPR006085 // XPG N-terminal // 1.2E-40
12611	153810_at	-0.709277	1.70948	-9.77078	4.77937e-11	8.95942e-10	14.9664	FBgn0027053	CG14884	CSN5	COP9 complex homolog subunit 5	42000	19781 // NEDD8 activating enzyme activity // inferred from mutant phenotype /// 30528 // transcription regulator activity // inferred from electronic annotation /// 5515 // protein binding // inferred from physical interaction /// 8233 // peptidase activity // inferred from electronic annotation /// 8237 // metallopeptidase activity // inferred from electronic annotation /// 16787 // hydrolase ac…	338 // protein deneddylation // inferred from mutant phenotype /// 6366 // transcription from RNA polymerase II promoter // inferred from electronic annotation /// 7309 // oocyte axis determination // inferred from mutant phenotype /// 7310 // oocyte dorsal/ventral axis determination // inferred from mutant phenotype /// 7314 // oocyte anterior/posterior axis determination // inferred from mutant…	5737 // cytoplasm // inferred from direct assay /// 8180 // signalosome complex // inferred from mutant phenotype /// 8180 // signalosome complex // inferred from sequence or structural similarity /// 8180 // signalosome complex // non-traceable author statement /// 8180 // signalosome complex // traceable author statement /// 5634 // nucleus // inferred from electronic annotation /// 8180 // sig…	IPR000555 // Peptidase M67, Mov34 // 1.1E-50
340	141539_at	-0.659723	3.38714	-9.76866	4.80411e-11	8.98606e-10	14.9612	FBgn0040070	CG31884	Trx-2	thioredoxin-2	34281	30508 // thiol-disulfide exchange intermediate activity // inferred from direct assay /// 30508 // thiol-disulfide exchange intermediate activity // inferred from sequence or structural similarity /// 30508 // thiol-disulfide exchange intermediate activity // non-traceable author statement /// 30508 // thiol-disulfide exchange intermediate activity // inferred from sequence similarity	6118 // electron transport // inferred from electronic annotation /// 6457 // protein folding // inferred from electronic annotation /// 6790 // sulfur metabolism // inferred from electronic annotation /// 45454 // cell redox homeostasis // inferred from direct assay /// 6810 // transport // inferred from electronic annotation	---	IPR006662 // Thioredoxin type domain // 1.2E-38 /// IPR006662 // Thioredoxin type domain // 1.8E-37
991	142190_at	-0.675511	2.03891	-9.76221	4.88059e-11	9.0927e-10	14.9452	FBgn0033981	CG10247	Cyp6a21	Cyp6a21	36665	4497 // monooxygenase activity // inferred from electronic annotation /// 16491 // oxidoreductase activity // inferred from electronic annotation /// 5506 // iron ion binding // inferred from electronic annotation /// 20037 // heme binding // inferred from electronic annotation /// 46872 // metal ion binding // inferred from electronic annotation	6118 // electron transport // inferred from electronic annotation /// 8202 // steroid metabolism // inferred from electronic annotation	5792 // microsome // non-traceable author statement /// 16020 // membrane // non-traceable author statement /// 16020 // membrane // inferred from electronic annotation	IPR001128 // Cytochrome P450 // 2.5E-120
9389	150588_at	-1.81394	3.54098	-9.76238	4.87852e-11	9.0927e-10	14.9457	FBgn0039330	CG11909	CG11909	CG11909	43072	4558 // alpha-glucosidase activity // inferred from sequence or structural similarity /// 4553 // hydrolase activity, hydrolyzing O-glycosyl compounds // inferred from electronic annotation /// 4558 // alpha-glucosidase activity // inferred from sequence similarity	5976 // polysaccharide metabolism // inferred from electronic annotation /// 5996 // monosaccharide metabolism // inferred from electronic annotation /// 5975 // carbohydrate metabolism // inferred from electronic annotation	17177 // alpha-glucosidase II complex // inferred from sequence or structural similarity /// 17177 // alpha-glucosidase II complex // inferred from sequence similarity	IPR000322 // Glycoside hydrolase, family 31 // 3.7E-11
5988	147187_at	-0.548024	0.730569	-9.75944	4.9137e-11	9.14222e-10	14.9384	FBgn0033903	CG8323	CG8323	CG8323	36566	5386 // carrier activity // inferred from sequence or structural similarity /// 5488 // binding // inferred from electronic annotation /// 5215 // transporter activity // inferred from electronic annotation /// 5386 // carrier activity // inferred from sequence similarity	6810 // transport // inferred from electronic annotation	5740 // mitochondrial envelope // inferred from sequence or structural similarity /// 5743 // mitochondrial inner membrane // inferred from electronic annotation /// 16020 // membrane // inferred from electronic annotation /// 16021 // integral to membrane // inferred from electronic annotation /// 5740 // mitochondrial envelope // inferred from sequence similarity	IPR001993 // Mitochondrial substrate carrier // 4.9E-19 /// IPR001993 // Mitochondrial substrate carrier // 6.3E-19 /// IPR001993 // Mitochondrial substrate carrier // 1.5E-24
7555	148754_at	-0.560239	-0.165083	-9.75025	5.02547e-11	9.33778e-10	14.9157	FBgn0028418	CG13480	Leucokinin	Leucokinin	47746	5179 // hormone activity // non-traceable author statement /// 5184 // neuropeptide hormone activity // non-traceable author statement /// 8613 // diuretic hormone activity // non-traceable author statement /// 8613 // diuretic hormone activity // traceable author statement	7218 // neuropeptide signaling pathway // non-traceable author statement /// 7218 // neuropeptide signaling pathway // traceable author statement /// 7589 // fluid secretion // inferred from direct assay /// 19722 // calcium-mediated signaling // non-traceable author statement /// 7218 // neuropeptide signaling pathway // inferred from electronic annotation	---	---
8719	149918_at	-0.568807	0.715996	-9.74147	5.13465e-11	9.5154e-10	14.894	FBgn0038262	CG14857	CG14857	CG14857	41791	8513 // organic cation porter activity // inferred from sequence or structural similarity /// 15144 // carbohydrate transporter activity // inferred from electronic annotation /// 5215 // transporter activity // inferred from electronic annotation /// 8513 // organic cation porter activity // inferred from sequence similarity	6812 // cation transport // inferred from electronic annotation /// 6858 // extracellular transport // inferred from electronic annotation /// 6810 // transport // inferred from electronic annotation	16021 // integral to membrane // inferred from electronic annotation /// 16020 // membrane // inferred from electronic annotation	---
11728	152927_at	-0.652795	0.097413	-9.72273	5.37587e-11	9.91373e-10	14.8476	FBgn0030398	CG2555	CG2555	CG2555	32203	8010 // structural constituent of larval cuticle (sensu Insecta) // inferred from sequence or structural similarity /// 42302 // structural constituent of cuticle // inferred from electronic annotation /// 8010 // structural constituent of larval cuticle (sensu Insecta) // inferred from sequence similarity	---	---	IPR000618 // Insect cuticle protein // 3.0E-29
13207	154406_at	-0.92865	4.01115	-9.70762	5.57873e-11	1.02435e-09	14.8101	FBgn0033356	CG8229	CG8229	CG8229	35898	---	---	---	---
6057	147256_at	-0.737405	2.20282	-9.69967	5.68857e-11	1.03772e-09	14.7904	FBgn0034031	CG12963	CG12963	CG12963	36724	---	---	---	---
8285	149484_at	-0.69234	-0.265305	-9.68114	5.95337e-11	1.0818e-09	14.7445	FBgn0037570	CG11693	CG11693	CG11693	40984	---	---	---	IPR007999 // Protein of unknown function DUF745 // 1.2E-94
11193	152392_at	-0.857736	2.49568	-9.68024	5.96655e-11	1.08279e-09	14.7422	FBgn0036553	CG17027	CG17027	CG17027	39742	8934 // inositol-1(or 4)-monophosphatase activity // inferred from sequence or structural similarity /// 8934 // inositol-1(or 4)-monophosphatase activity // non-traceable author statement /// 4437 // inositol or phosphatidylinositol phosphatase activity // inferred from electronic annotation /// 42578 // phosphoric ester hydrolase activity // inferred from electronic annotation /// 8934 // inosi…	6644 // phospholipid metabolism // inferred from electronic annotation /// 7242 // intracellular signaling cascade // inferred from electronic annotation /// 16311 // dephosphorylation // non-traceable author statement /// 5975 // carbohydrate metabolism // inferred from electronic annotation	---	IPR000760 // Inositol monophosphatase // 1.7E-101
7735	148934_at	-0.687452	-0.0188988	-9.67782	6.0021e-11	1.08783e-09	14.7362	FBgn0052169	CG32169	CG32169	CG32169	39919	3729 // mRNA binding // inferred from electronic annotation /// 5515 // protein binding // inferred from physical interaction /// 166 // nucleotide binding // inferred from electronic annotation /// 3676 // nucleic acid binding // inferred from electronic annotation	---	---	IPR000504 // RNA-binding region RNP-1 (RNA recognition motif) // 1.2E-20 /// IPR000504 // RNA-binding region RNP-1 (RNA recognition motif) // 2.1E-20
12344	153543_at	-0.704067	1.77597	-9.67451	6.05118e-11	1.0939e-09	14.728	FBgn0025693	CG11163	CG11163	CG11163	35513	5385 // zinc ion transporter activity // inferred from sequence or structural similarity /// 5515 // protein binding // inferred from physical interaction /// 42802 // identical protein binding // inferred from physical interaction /// 8324 // cation transporter activity // inferred from electronic annotation /// 5385 // zinc ion transporter activity // inferred from sequence similarity	6812 // cation transport // inferred from electronic annotation	16020 // membrane // inferred from electronic annotation	IPR002524 // Cation efflux protein // 1.0E-36 /// IPR002524 // Cation efflux protein // 2.2E-29
9374	150573_at	-0.901011	1.50108	-9.67344	6.06711e-11	1.09536e-09	14.7253	---	CG11889 /// CG11891	---	---	---	16301 // kinase activity // inferred from electronic annotation /// 16740 // transferase activity // inferred from electronic annotation	---	---	---
12650	153849_at	-0.62511	2.95408	-9.66823	6.14534e-11	1.10806e-09	14.7124	FBgn0021979	CG3082	l(2)k09913	lethal (2) k09913	37661	5515 // protein binding // inferred from physical interaction	---	---	IPR008547 // Eukaryotic protein of unknown function DUF829 // 9.8E-99 /// IPR008547 // Eukaryotic protein of unknown function DUF829 // 9.8E-99
9512	150711_at	-0.729779	1.46019	-9.66167	6.24524e-11	1.12462e-09	14.6961	FBgn0039485	CG17189	CG17189	CG17189	43263	---	---	---	IPR004272 // Odorant binding protein // 3.8E-59
7146	148345_at	-1.22197	0.398561	-9.65509	6.34718e-11	1.14005e-09	14.6797	FBgn0052374	CG32374	CG32374	CG32374	38848	4252 // serine-type endopeptidase activity // inferred from sequence or structural similarity /// 4263 // chymotrypsin activity // inferred from electronic annotation /// 4295 // trypsin activity // non-traceable author statement /// 4252 // serine-type endopeptidase activity // inferred from sequence similarity	6508 // proteolysis // non-traceable author statement	---	IPR001254 // Peptidase S1, chymotrypsin // 4.1E-66
1028	142227_at	-0.691852	0.925954	-9.65381	6.36706e-11	1.14216e-09	14.6766	FBgn0039809	CG15547	CG15547	CG15547	43661	4550 // nucleoside diphosphate kinase activity // inferred from electronic annotation /// 5524 // ATP binding // inferred from electronic annotation	6183 // GTP biosynthesis // inferred from electronic annotation /// 6228 // UTP biosynthesis // inferred from electronic annotation /// 6241 // CTP biosynthesis // inferred from electronic annotation	---	---
11424	152623_at	-0.813751	1.26329	-9.64713	6.47259e-11	1.1596e-09	14.66	FBgn0015570	CG2505	Est2	Esterase-2	40908	4091 // carboxylesterase activity // inferred from sequence or structural similarity /// 4091 // carboxylesterase activity // non-traceable author statement /// 3824 // catalytic activity // inferred from electronic annotation /// 4104 // cholinesterase activity // inferred from electronic annotation /// 4091 // carboxylesterase activity // inferred from sequence similarity	---	---	IPR002018 // Carboxylesterase, type B // 1.0E-126
2423	143622_at	-0.812522	1.54458	-9.63134	6.72922e-11	1.20404e-09	14.6207	FBgn0010423	CG9073	TpnC47D	Troponin C at 47D	36195	5509 // calcium ion binding // non-traceable author statement /// 5516 // calmodulin binding // inferred from electronic annotation /// 5509 // calcium ion binding // inferred from electronic annotation	1539 // ciliary or flagellar motility // inferred from electronic annotation /// 6936 // muscle contraction // inferred from electronic annotation /// 19722 // calcium-mediated signaling // inferred from electronic annotation	9288 // flagellum (sensu Bacteria) // inferred from electronic annotation	IPR002048 // Calcium-binding EF-hand // 0.73 /// IPR002048 // Calcium-binding EF-hand // 1.1E-6 /// IPR002048 // Calcium-binding EF-hand // 2.8E-5 /// IPR002048 // Calcium-binding EF-hand // 8.3E-8
6235	147434_at	-0.911135	0.67949	-9.61788	6.95613e-11	1.24305e-09	14.5872	FBgn0063499	CG17522	GstE10	Glutathione S transferase E10	37105	4364 // glutathione transferase activity // inferred from sequence or structural similarity /// 5515 // protein binding // inferred from physical interaction /// 16740 // transferase activity // inferred from electronic annotation /// 4364 // glutathione transferase activity // inferred from sequence similarity	6952 // defense response // inferred from electronic annotation /// 9636 // response to toxin // inferred from electronic annotation	---	IPR004046 // Glutathione S-transferase, C-terminal // 1.1E-10 /// IPR004045 // Glutathione S-transferase, N-terminal // 6.6E-17
1007	142206_s_at	-1.24339	1.64324	-9.61249	7.04922e-11	1.25329e-09	14.5738	FBgn0027578 /// FBgn0039613	CG14527 /// CG14526	CG14526 /// CG14527	CG14526 /// CG14527	43412 /// 43413	4222 // metalloendopeptidase activity // inferred from sequence or structural similarity /// 4245 // neprilysin activity // inferred from electronic annotation /// 8270 // zinc ion binding // inferred from electronic annotation /// 16511 // endothelin-converting enzyme activity // inferred from sequence or structural similarity /// 8233 // peptidase activity // inferred from electronic annotation…	6508 // proteolysis // inferred from electronic annotation /// 7165 // signal transduction // inferred from electronic annotation	16020 // membrane // inferred from electronic annotation	IPR008753 // Peptidase M13 // 8.0E-12 /// IPR008753 // Peptidase M13 // 7.5E-5 /// IPR000718 // Peptidase M13, neprilysin // 1.3E-45 /// IPR008753 // Peptidase M13 // 9.3E-10 /// IPR000718 // Peptidase M13, neprilysin // 2.0E-46
6973	148172_at	-0.650862	1.46534	-9.61197	7.05824e-11	1.25331e-09	14.5725	FBgn0053514	CG33514	CG33514	CG33514	3346239	8431 // vitamin E binding // inferred from sequence or structural similarity /// 5215 // transporter activity // inferred from electronic annotation /// 8431 // vitamin E binding // inferred from sequence similarity	6810 // transport // inferred from electronic annotation	5622 // intracellular // inferred from electronic annotation	IPR001251 // Cellular retinaldehyde-binding)/triple function, C-terminal // 6.9E-23
2898	144097_at	-1.24075	3.60439	-9.61059	7.0823e-11	1.25599e-09	14.569	FBgn0025814	CG1742	Mgstl	Microsomal glutathione S-transferase-like	44110	4364 // glutathione transferase activity // inferred from sequence or structural similarity /// 16740 // transferase activity // inferred from electronic annotation /// 4364 // glutathione transferase activity // inferred from sequence similarity	6464 // protein modification // inferred from electronic annotation /// 6952 // defense response // inferred from electronic annotation /// 9636 // response to toxin // inferred from electronic annotation	5741 // mitochondrial outer membrane // inferred from sequence or structural similarity /// 5792 // microsome // inferred from sequence or structural similarity /// 5741 // mitochondrial outer membrane // inferred from sequence similarity /// 5792 // microsome // inferred from sequence similarity	IPR001129 // Membrane-associated proteins in eicosanoid and glutathione metabolism (MAPEG) // 1.3E-66
10806	152005_at	-0.59688	0.679321	-9.59725	7.31909e-11	1.2947e-09	14.5358	FBgn0038946	CG7077	CG7077	CG7077	42614	16616 // oxidoreductase activity, acting on the CH-OH group of donors, NAD or NADP as acceptor // inferred from sequence or structural similarity /// 16491 // oxidoreductase activity // inferred from electronic annotation /// 16616 // oxidoreductase activity, acting on the CH-OH group of donors, NAD or NADP as acceptor // inferred from sequence similarity	8152 // metabolism // inferred from electronic annotation	---	IPR002198 // Short-chain dehydrogenase/reductase SDR // 6.4E-46
7636	148835_at	-0.892079	0.889854	-9.59228	7.40948e-11	1.30739e-09	14.5234	FBgn0036549	CG10516	CG10516	CG10516	39738	---	---	---	IPR003877 // SPla/RYanodine receptor SPRY // 3.2E-32
5738	146937_at	-0.901789	-0.150835	-9.5819	7.60183e-11	1.33628e-09	14.4975	FBgn0033508	CG12905	Obp46a	Odorant-binding protein 46a	36088	5549 // odorant binding // non-traceable author statement	---	---	---
4851	146050_at	-1.85322	2.01751	-9.581	7.61866e-11	1.33756e-09	14.4953	FBgn0032069	CG9468	CG9468	CG9468	34206	4559 // alpha-mannosidase activity // inferred from sequence or structural similarity /// 16799 // hydrolase activity, hydrolyzing N-glycosyl compounds // inferred from electronic annotation /// 4559 // alpha-mannosidase activity // inferred from electronic annotation /// 15923 // mannosidase activity // inferred from electronic annotation /// 16787 // hydrolase activity // inferred from electron…	5975 // carbohydrate metabolism // inferred from electronic annotation /// 6013 // mannose metabolism // inferred from electronic annotation	5764 // lysosome // inferred from sequence or structural similarity /// 5764 // lysosome // inferred from sequence similarity	IPR000602 // Glycoside hydrolase, family 38 // 1.0E-126
11488	152687_at	-1.29832	2.40777	-9.57561	7.72073e-11	1.35379e-09	14.4818	FBgn0030688	CG8952	CG8952	CG8952	32525	4252 // serine-type endopeptidase activity // inferred from sequence or structural similarity /// 4263 // chymotrypsin activity // inferred from electronic annotation /// 4295 // trypsin activity // inferred from electronic annotation /// 42708 // elastase activity // non-traceable author statement /// 4252 // serine-type endopeptidase activity // inferred from electronic annotation /// 4252 // s…	6508 // proteolysis // non-traceable author statement /// 6508 // proteolysis // inferred from electronic annotation	---	IPR001254 // Peptidase S1, chymotrypsin // 3.2E-59
3513	144712_at	-0.869712	1.4652	-9.56392	7.94712e-11	1.39e-09	14.4526	FBgn0041629	CG1787	Hexo2	Hexosaminidase 2	31808	4563 // beta-N-acetylhexosaminidase activity // inferred from sequence or structural similarity /// 16799 // hydrolase activity, hydrolyzing N-glycosyl compounds // inferred from electronic annotation /// 4563 // beta-N-acetylhexosaminidase activity // inferred from electronic annotation /// 4563 // beta-N-acetylhexosaminidase activity // inferred from sequence similarity	5976 // polysaccharide metabolism // inferred from electronic annotation /// 5975 // carbohydrate metabolism // inferred from electronic annotation	---	IPR001540 // Glycoside hydrolase, family 20 // 1.4E-95 /// IPR001540 // Glycoside hydrolase, family 20 // 1.7E-10
11283	152482_at	-1.01183	2.37112	-9.53179	8.60463e-11	1.49012e-09	14.3723	FBgn0035484	CG11594	CG11594	CG11594	38473	5515 // protein binding // inferred from physical interaction	5975 // carbohydrate metabolism // inferred from electronic annotation	---	IPR000577 // Carbohydrate kinase, FGGY // 1.6E-11 /// IPR000577 // Carbohydrate kinase, FGGY // 1.6E-11
3980	145179_at	-0.66702	1.10608	-9.51669	8.93257e-11	1.5431e-09	14.3345	FBgn0030738	CG9915	CG9915	CG9915	32593	---	---	---	IPR008654 // IWS1, C-terminal // 1.0E-126
7864	149063_at	-1.03249	1.79119	-9.50506	9.19385e-11	1.58238e-09	14.3054	FBgn0036891	CG9372	CG9372	CG9372	40137	4263 // chymotrypsin activity // inferred from electronic annotation /// 4295 // trypsin activity // non-traceable author statement /// 8236 // serine-type peptidase activity // inferred from sequence or structural similarity /// 4252 // serine-type endopeptidase activity // inferred from electronic annotation /// 8233 // peptidase activity // inferred from electronic annotation /// 16787 // hydr…	6508 // proteolysis // non-traceable author statement /// 6508 // proteolysis // inferred from electronic annotation	---	IPR001254 // Peptidase S1, chymotrypsin // 8.7E-76
7678	148877_at	-1.28166	3.70979	-9.50143	9.27695e-11	1.59473e-09	14.2963	FBgn0042201 /// FBgn0068114	CG13061	Nplp3 /// DyakNplp3	Neuropeptide-like precursor 3 /// Nplp3	59235	5184 // neuropeptide hormone activity // non-traceable author statement	7218 // neuropeptide signaling pathway // non-traceable author statement /// 7218 // neuropeptide signaling pathway // inferred from electronic annotation	5576 // extracellular region // non-traceable author statement	---
13938	155137_at	-0.724833	1.14975	-9.49899	9.33308e-11	1.60143e-09	14.2902	FBgn0033891	CG8067	CG8067	CG8067	36552	---	---	---	---
10577	151776_at	-1.60811	4.8208	-9.4853	9.6557e-11	1.65173e-09	14.2559	FBgn0037763	CG16904	CG16904	CG16904	41212	8415 // acyltransferase activity // inferred from electronic annotation /// 16740 // transferase activity // inferred from electronic annotation /// 5515 // protein binding // inferred from physical interaction	6629 // lipid metabolism // inferred from electronic annotation /// 6631 // fatty acid metabolism // inferred from electronic annotation	16021 // integral to membrane // inferred from electronic annotation	IPR002076 // GNS1/SUR4 membrane protein // 4.7E-6
13855	155054_at	-1.0261	1.4301	-9.484	9.68693e-11	1.65505e-09	14.2526	FBgn0037219	CG18143	CG18143	CG18143	40528	5509 // calcium ion binding // inferred from electronic annotation /// 8892 // guanine deaminase activity // inferred from sequence or structural similarity /// 5515 // protein binding // inferred from physical interaction /// 16787 // hydrolase activity // inferred from electronic annotation /// 8892 // guanine deaminase activity // inferred from sequence similarity	6144 // purine base metabolism // inferred from electronic annotation	---	IPR006680 // Amidohydrolase // 1.1E-51
6127	147326_at	-0.551566	0.748117	-9.48222	9.72974e-11	1.65866e-09	14.2481	FBgn0034151	CG15617	CG15617	CG15617	36871	5515 // protein binding // inferred from electronic annotation	---	---	IPR001478 // PDZ/DHR/GLGF domain // 6.1E-6
6628	147827_at	-0.674737	0.0945688	-9.4808	9.76417e-11	1.66015e-09	14.2446	FBgn0053519	CG33519	CG33519	CG33519	3346201	5524 // ATP binding // inferred from electronic annotation /// 4672 // protein kinase activity // inferred from electronic annotation	6468 // protein amino acid phosphorylation // inferred from electronic annotation	---	IPR003961 // Fibronectin, type III // 2.8E-8 /// IPR003961 // Fibronectin, type III // 9.2E-14 /// IPR000719 // Protein kinase // 1.9E-51 /// IPR000719 // Protein kinase // 9.3E-42 /// IPR007110 // Immunoglobulin-like // 3.2 /// IPR007110 // Immunoglobulin-like // 7.8E-5 /// IPR007110 // Immunoglobulin-like // 2.2E-5 /// IPR007110 // Immunoglobulin-like // 0.1 /// IPR007110 // Immunoglobulin-like…
5068	146267_at	-0.772227	1.40262	-9.4769	9.85905e-11	1.67425e-09	14.2348	FBgn0032402	CG14945	CG14945	CG14945	34623	47396 // glycosylphosphatidylinositol diacylglycerol-lyase activity // inferred from electronic annotation	6650 // glycerophospholipid metabolism // inferred from electronic annotation	---	IPR000909 // Phosphatidylinositol-specific phospholipase C, X domain // 1.5E-8
12044	153243_at	-0.643325	2.44933	-9.47599	9.88136e-11	1.676e-09	14.2325	FBgn0010602	CG3018	lwr	lesswright	33226	4840 // ubiquitin conjugating enzyme activity // inferred from electronic annotation /// 5515 // protein binding // inferred from physical interaction /// 16874 // ligase activity // inferred from electronic annotation /// 19949 // SUMO conjugating enzyme activity // inferred from genetic interaction /// 19949 // SUMO conjugating enzyme activity // inferred from physical interaction /// 19949 // …	6464 // protein modification // inferred from genetic interaction /// 6464 // protein modification // inferred from physical interaction /// 6512 // ubiquitin cycle // inferred from electronic annotation /// 6606 // protein import into nucleus // inferred from mutant phenotype /// 6606 // protein import into nucleus // inferred from physical interaction /// 7143 // female meiosis // inferred from…	5634 // nucleus // inferred from direct assay	IPR000608 // Ubiquitin-conjugating enzymes // 3.3E-70
2394	143593_at	-0.555267	-0.0202281	-9.44864	1.05765e-10	1.78526e-09	14.1638	FBgn0010296	CG10789	ng4	new glue 4	31301	5198 // structural molecule activity // non-traceable author statement	7127 // meiosis I // non-traceable author statement /// 7594 // puparial adhesion // non-traceable author statement	5576 // extracellular region // non-traceable author statement	---
8591	149790_at	-0.77014	1.46591	-9.44802	1.05928e-10	1.78586e-09	14.1623	FBgn0038069	CG11608	CG11608	CG11608	41556	4806 // triacylglycerol lipase activity // inferred from sequence or structural similarity /// 4806 // triacylglycerol lipase activity // inferred from sequence similarity	6629 // lipid metabolism // inferred from electronic annotation	---	IPR006693 // Ab-hydrolase associated lipase region // 1.9E-15
9617	150816_at	-0.767407	2.46393	-9.44557	1.06576e-10	1.79463e-09	14.1561	FBgn0062442	CG1458	CG1458	CG1458	43459	---	---	---	---
8810	150009_at	-0.653899	3.68977	-9.42727	1.11542e-10	1.87599e-09	14.1101	FBgn0038421	CG17931	CG17931	CG17931	41985	---	---	---	IPR007513 // Four F5 protein // 2.4E-30 /// IPR007513 // Four F5 protein // 7.0E-27
541	141740_at	-0.642404	2.18897	-9.42558	1.1201e-10	1.88161e-09	14.1059	FBgn0039741	CG7943	CG7943	CG7943	43574	5386 // carrier activity // inferred from sequence or structural similarity /// 5488 // binding // inferred from electronic annotation /// 5386 // carrier activity // inferred from sequence similarity	6810 // transport // inferred from electronic annotation	5740 // mitochondrial envelope // inferred from sequence or structural similarity /// 16020 // membrane // inferred from electronic annotation /// 16021 // integral to membrane // inferred from electronic annotation /// 5740 // mitochondrial envelope // inferred from sequence similarity	IPR001993 // Mitochondrial substrate carrier // 5.5E-6 /// IPR001993 // Mitochondrial substrate carrier // 1.3E-10 /// IPR001993 // Mitochondrial substrate carrier // 5.5E-8
238	141437_at	-0.879309	1.29215	-9.41364	1.15393e-10	1.92459e-09	14.0758	FBgn0036975	CG5618	CG5618	CG5618	40241	4782 // sulfinoalanine decarboxylase activity // inferred from sequence or structural similarity /// 17039 // dipeptidyl-peptidase III activity // inferred from electronic annotation /// 5515 // protein binding // inferred from physical interaction /// 16829 // lyase activity // inferred from electronic annotation /// 16831 // carboxy-lyase activity // inferred from electronic annotation /// 4782…	6508 // proteolysis // inferred from electronic annotation /// 6520 // amino acid metabolism // inferred from electronic annotation /// 6790 // sulfur metabolism // inferred from electronic annotation /// 7268 // synaptic transmission // inferred from electronic annotation /// 19752 // carboxylic acid metabolism // inferred from electronic annotation	5737 // cytoplasm // inferred from electronic annotation	IPR002129 // Pyridoxal-dependent decarboxylase // 1.3E-96 /// IPR002129 // Pyridoxal-dependent decarboxylase // 1.5E-80
12332	153531_at	-0.777604	5.61473	-9.38957	1.22528e-10	2.0339e-09	14.0152	FBgn0000044	CG10067	Act57B	Actin 57B	37368	3774 // motor activity // inferred from electronic annotation /// 5200 // structural constituent of cytoskeleton // inferred from sequence or structural similarity /// 15020 // glucuronosyltransferase activity // non-traceable author statement /// 166 // nucleotide binding // inferred from electronic annotation /// 5198 // structural molecule activity // inferred from electronic annotation /// 52…	910 // cytokinesis // inferred from mutant phenotype /// 7010 // cytoskeleton organization and biogenesis // inferred from sequence or structural similarity /// 7507 // heart development // non-traceable author statement /// 15012 // heparan sulfate proteoglycan biosynthesis // non-traceable author statement /// 30206 // chondroitin sulfate biosynthesis // non-traceable author statement /// 7010 …	5884 // actin filament // inferred from sequence or structural similarity /// 5884 // actin filament // non-traceable author statement /// 5856 // cytoskeleton // inferred from electronic annotation /// 5884 // actin filament // inferred from electronic annotation /// 5884 // actin filament // inferred from sequence similarity	IPR004000 // Actin/actin-like // 1.0E-126
6868	148067_at	-0.456677	1.28501	-9.38781	1.23068e-10	2.04045e-09	14.0108	FBgn0035374	CG2101	mRpS35	mitochondrial ribosomal protein S35	38345	3735 // structural constituent of ribosome // inferred from sequence or structural similarity /// 5515 // protein binding // inferred from physical interaction /// 3735 // structural constituent of ribosome // inferred from sequence similarity	6412 // protein biosynthesis // inferred from sequence or structural similarity /// 6412 // protein biosynthesis // inferred from sequence similarity	5763 // mitochondrial small ribosomal subunit // inferred from sequence or structural similarity /// 5763 // mitochondrial small ribosomal subunit // inferred from sequence similarity	---
4580	145779_at	-1.06313	1.92457	-9.38573	1.23707e-10	2.04862e-09	14.0055	FBgn0031629	CG3244	CG3244	CG3244	33678	5529 // sugar binding // inferred from electronic annotation	---	---	---
10011	151210_at	-1.02008	5.24295	-9.38339	1.24434e-10	2.05823e-09	13.9996	FBgn0040735	CG16836	CG16836	CG16836	50208	---	---	---	---
10756	151955_at	-0.70585	1.86632	-9.37956	1.25628e-10	2.07309e-09	13.99	FBgn0000165	CG5779	Bc	Black cells	37044	4503 // monophenol monooxygenase activity // inferred from sequence or structural similarity /// 4503 // monophenol monooxygenase activity // non-traceable author statement /// 4503 // monophenol monooxygenase activity // traceable author statement /// 5344 // oxygen transporter activity // inferred from electronic annotation /// 4503 // monophenol monooxygenase activity // inferred from electron…	6810 // transport // inferred from electronic annotation /// 6952 // defense response // non-traceable author statement /// 9611 // response to wounding // inferred from mutant phenotype /// 9613 // response to pest, pathogen or parasite // inferred from mutant phenotype /// 35006 // melanization defense response // inferred from genetic interaction /// 35006 // melanization defense response // i…	---	IPR000896 // Arthropod hemocyanin/insect LSP // 2.2E-74 /// IPR005204 // Hemocyanin, N-terminal // 1.5E-6 /// IPR005203 // Hemocyanin, C-terminal // 8.0E-52
13007	154206_at	-1.13227	2.7111	-9.3719	1.28053e-10	2.10566e-09	13.9706	FBgn0038984	CG5315	CG5315	CG5315	42656	42562 // hormone binding // inferred from sequence or structural similarity /// 5515 // protein binding // inferred from physical interaction /// 4872 // receptor activity // inferred from electronic annotation /// 42562 // hormone binding // inferred from sequence similarity	9755 // hormone-mediated signaling // inferred from sequence or structural similarity /// 19395 // fatty acid oxidation // inferred from sequence or structural similarity /// 6629 // lipid metabolism // inferred from electronic annotation /// 6631 // fatty acid metabolism // inferred from electronic annotation /// 9755 // hormone-mediated signaling // inferred from sequence similarity /// 19395 /…	16021 // integral to membrane // inferred from sequence or structural similarity /// 16020 // membrane // inferred from electronic annotation /// 16021 // integral to membrane // inferred from electronic annotation /// 16021 // integral to membrane // inferred from sequence similarity	IPR004254 // Hly-III related proteins // 1.0E-112 /// IPR004254 // Hly-III related proteins // 1.0E-112
12701	153900_at	-0.629207	2.87798	-9.33419	1.40709e-10	2.29453e-09	13.8754	FBgn0031815	CG9526	CG9526	CG9526	33900	---	---	---	IPR004299 // Membrane bound O-acyl transferase, MBOAT // 4.2E-75
10753	151952_at	-0.62555	1.73957	-9.3285	1.42727e-10	2.32242e-09	13.861	FBgn0037818	CG6465	CG6465	CG6465	41274	4046 // aminoacylase activity // inferred from sequence or structural similarity /// 8237 // metallopeptidase activity // inferred from electronic annotation /// 4046 // aminoacylase activity // inferred from electronic annotation /// 16787 // hydrolase activity // inferred from electronic annotation /// 46983 // protein dimerization activity // inferred from electronic annotation /// 4046 // ami…	6508 // proteolysis // inferred from electronic annotation /// 8652 // amino acid biosynthesis // inferred from electronic annotation /// 6520 // amino acid metabolism // inferred from electronic annotation	5737 // cytoplasm // inferred from electronic annotation	IPR002933 // Peptidase M20 // 1.1E-91
11544	152743_at	-1.72099	3.31202	-9.31779	1.46605e-10	2.38e-09	13.834	FBgn0040398	CG14629	CG14629	CG14629	31055	---	---	---	IPR009832 // Protein of unknown function DUF1397 // 1.0E-126
4697	145896_at	-0.707778	1.4362	-9.31126	1.49025e-10	2.4109e-09	13.8174	FBgn0031809	---	CG9508	CG9508	33893	4245 // neprilysin activity // inferred from sequence or structural similarity /// 8270 // zinc ion binding // inferred from electronic annotation /// 4245 // neprilysin activity // inferred from sequence similarity	6508 // proteolysis // inferred from electronic annotation /// 7155 // cell adhesion // inferred from electronic annotation	16020 // membrane // inferred from electronic annotation	IPR000718 // Peptidase M13, neprilysin // 8.6E-8 /// IPR007110 // Immunoglobulin-like // 6.7E-5 /// IPR007110 // Immunoglobulin-like // 7.1E-8
5886	147085_at	-1.09863	0.0874899	-9.30206	1.52499e-10	2.46141e-09	13.7941	FBgn0050042	CG30042	CG30042	CG30042	36345	---	---	---	IPR000618 // Insect cuticle protein // 1.5E-26
9673	150872_at	-0.566451	0.0953954	-9.29228	1.56284e-10	2.51634e-09	13.7694	FBgn0039747	CG9753	CG9753	CG9753	43583	1609 // adenosine receptor activity, G-protein coupled // inferred from sequence or structural similarity /// 4930 // G-protein coupled receptor activity // inferred from electronic annotation /// 1609 // adenosine receptor activity, G-protein coupled // inferred from sequence similarity	7186 // G-protein coupled receptor protein signaling pathway // inferred from sequence or structural similarity /// 7270 // nerve-nerve synaptic transmission // inferred from electronic annotation /// 7186 // G-protein coupled receptor protein signaling pathway // inferred from sequence similarity	5886 // plasma membrane // inferred from electronic annotation /// 16021 // integral to membrane // inferred from sequence or structural similarity /// 16021 // integral to membrane // inferred from sequence similarity	IPR000276 // Rhodopsin-like GPCR superfamily // 7.8E-72
11202	152401_at	-0.616122	2.49371	-9.29188	1.56441e-10	2.51634e-09	13.7684	FBgn0032015	CG7830	CG7830	CG7830	34137	16740 // transferase activity // inferred from electronic annotation /// 16757 // transferase activity, transferring glycosyl groups // inferred from electronic annotation	6118 // electron transport // inferred from electronic annotation /// 6464 // protein modification // inferred from electronic annotation /// 19538 // protein metabolism // inferred from electronic annotation	---	IPR006844 // OST3/OST6 // 1.0E-126
9834	151033_r_at	-0.794327	1.58011	-9.28585	1.58824e-10	2.54883e-09	13.7531	---	---	---	---	---	---	---	---	---
9554	150753_at	-0.741531	0.51883	-9.28351	1.59759e-10	2.5609e-09	13.7472	FBgn0039549	CG12873	CG12873	CG12873	43339	---	---	---	---
13428	154627_at	-0.862978	1.53245	-9.27693	1.62419e-10	2.59944e-09	13.7305	FBgn0032433	CG5427	Oatp33Ea	Organic anion transporting polypeptide 33Ea	34660	5215 // transporter activity // inferred from sequence or structural similarity /// 8514 // organic anion transporter activity // inferred from sequence or structural similarity /// 5215 // transporter activity // inferred from electronic annotation /// 5215 // transporter activity // inferred from sequence similarity /// 8514 // organic anion transporter activity // inferred from sequence simila…	6820 // anion transport // inferred from electronic annotation /// 15711 // organic anion transport // inferred from sequence or structural similarity /// 6810 // transport // inferred from electronic annotation /// 15711 // organic anion transport // inferred from sequence similarity	16020 // membrane // inferred from electronic annotation	IPR004157 // Organic anion transporter polypeptide (OATP), C-terminal // 1.0E-126
13733	154932_at	-1.02955	2.50699	-9.26757	1.66281e-10	2.65329e-09	13.7067	FBgn0039293	CG11851	CG11851	CG11851	43031	30 // mannosyltransferase activity // inferred from sequence or structural similarity /// 30 // mannosyltransferase activity // inferred from sequence similarity	6486 // protein amino acid glycosylation // inferred from sequence or structural similarity /// 6486 // protein amino acid glycosylation // inferred from sequence similarity	---	IPR005599 // Plasmid Maintenance Protein // 1.0E-126
10642	151841_at	-0.958069	1.97684	-9.2497	1.73915e-10	2.76252e-09	13.6614	FBgn0033320	CG8586	CG8586	CG8586	35854	4252 // serine-type endopeptidase activity // non-traceable author statement /// 4263 // chymotrypsin activity // inferred from electronic annotation /// 4295 // trypsin activity // inferred from electronic annotation /// 4252 // serine-type endopeptidase activity // inferred from electronic annotation	6508 // proteolysis // inferred from electronic annotation	---	IPR001254 // Peptidase S1, chymotrypsin // 1.8E-54
1043	142242_at	-0.729377	0.308132	-9.235	1.8046e-10	2.85677e-09	13.6241	FBgn0034231	CG11419	CG11419	CG11419	36975	5515 // protein binding // inferred from electronic annotation /// 16874 // ligase activity // inferred from electronic annotation /// 5515 // protein binding // inferred from physical interaction	74 // regulation of progression through cell cycle // inferred from electronic annotation /// 90 // mitotic anaphase // non-traceable author statement /// 30071 // regulation of mitotic metaphase/anaphase transition // inferred from electronic annotation /// 6512 // ubiquitin cycle // inferred from electronic annotation /// 7049 // cell cycle // inferred from electronic annotation /// 7067 // mit…	5680 // anaphase-promoting complex // inferred from sequence or structural similarity /// 5680 // anaphase-promoting complex // inferred from electronic annotation /// 5680 // anaphase-promoting complex // inferred from sequence similarity	IPR004939 // Anaphase-promoting complex subunit 10 // 6.2E-123
498	141697_at	-0.821854	3.78234	-9.23155	1.82034e-10	2.87844e-09	13.6153	FBgn0010225	CG1106	Gel	Gelsolin	46008	3779 // actin binding // inferred from sequence or structural similarity /// 5200 // structural constituent of cytoskeleton // inferred from electronic annotation /// 5351 // sugar porter activity // inferred from electronic annotation /// 3779 // actin binding // inferred from electronic annotation /// 5509 // calcium ion binding // inferred from electronic annotation /// 3779 // actin binding /…	7010 // cytoskeleton organization and biogenesis // inferred from electronic annotation /// 9401 // phosphoenolpyruvate-dependent sugar phosphotransferase system // inferred from electronic annotation /// 30041 // actin filament polymerization // inferred from sequence or structural similarity	5576 // extracellular region // inferred from direct assay /// 5829 // cytosol // inferred from direct assay /// 5884 // actin filament // inferred from direct assay /// 5576 // extracellular region // inferred from expression pattern /// 5829 // cytosol // inferred from expression pattern /// 5856 // cytoskeleton // inferred from electronic annotation	IPR007123 // Gelsolin region // 5.9E-16 /// IPR007123 // Gelsolin region // 8.6E-15 /// IPR007123 // Gelsolin region // 2.6E-16 /// IPR007123 // Gelsolin region // 1.9E-7 /// IPR007123 // Gelsolin region // 7.5E-14 /// IPR007123 // Gelsolin region // 5.9E-16 /// IPR007123 // Gelsolin region // 8.6E-15 /// IPR007123 // Gelsolin region // 2.6E-16 /// IPR007123 // Gelsolin region // 1.9E-7 /// IPR00…
6682	147881_at	-0.650852	3.27693	-9.21797	1.88361e-10	2.97178e-09	13.5808	FBgn0035046	CG3683	CG3683	CG3683	37946	3954 // NADH dehydrogenase activity // inferred from sequence or structural similarity /// 8137 // NADH dehydrogenase (ubiquinone) activity // inferred from sequence or structural similarity /// 5515 // protein binding // inferred from physical interaction /// 3954 // NADH dehydrogenase activity // inferred from sequence similarity /// 8137 // NADH dehydrogenase (ubiquinone) activity // inferred …	6120 // mitochondrial electron transport, NADH to ubiquinone // inferred from sequence or structural similarity /// 6120 // mitochondrial electron transport, NADH to ubiquinone // inferred from sequence similarity	5747 // respiratory chain complex I (sensu Eukaryota) // inferred from sequence or structural similarity /// 5747 // respiratory chain complex I (sensu Eukaryota) // inferred from sequence similarity	IPR010625 // CHCH // 0.037 /// IPR010625 // CHCH // 3.0E-12
10894	152093_at	-0.793692	4.44612	-9.21403	1.90242e-10	2.9947e-09	13.5708	---	CG31919	---	---	---	---	---	---	IPR002110 // Ankyrin // 9.4E-10 /// IPR002110 // Ankyrin // 3.3E-10 /// IPR002110 // Ankyrin // 1.1E-5
9092	150291_at	-0.624042	1.11335	-9.19623	1.98963e-10	3.12147e-09	13.5255	FBgn0051189	CG31189	CG31189	CG31189	42487	---	---	---	IPR004272 // Odorant binding protein // 7.6E-52
5140	146339_at	-0.5371	1.62676	-9.19526	1.99451e-10	3.12563e-09	13.523	FBgn0032524	CG9267	CG9267	CG9267	34762	4721 // phosphoprotein phosphatase activity // inferred from electronic annotation /// 16791 // phosphoric monoester hydrolase activity // inferred from electronic annotation	6464 // protein modification // inferred from electronic annotation /// 6468 // protein amino acid phosphorylation // inferred from electronic annotation /// 19538 // protein metabolism // inferred from electronic annotation	---	IPR007482 // Protein tyrosine phosphatase-like protein, PTPLA // 3.5E-90
12211	153410_at	-0.98027	1.25723	-9.18709	2.03599e-10	3.18706e-09	13.5022	FBgn0041630	CG1318	Hexo1	Hexosaminidase 1	38528	4563 // beta-N-acetylhexosaminidase activity // inferred from sequence or structural similarity /// 16799 // hydrolase activity, hydrolyzing N-glycosyl compounds // inferred from electronic annotation /// 4563 // beta-N-acetylhexosaminidase activity // inferred from electronic annotation /// 4563 // beta-N-acetylhexosaminidase activity // inferred from sequence similarity	5976 // polysaccharide metabolism // inferred from electronic annotation /// 5975 // carbohydrate metabolism // inferred from electronic annotation	---	IPR001540 // Glycoside hydrolase, family 20 // 1.0E-126 /// IPR001540 // Glycoside hydrolase, family 20 // 2.8E-23 /// IPR001540 // Glycoside hydrolase, family 20 // 4.1E-116
8444	149643_at	-1.04589	0.061311	-9.17564	2.09566e-10	3.27315e-09	13.473	FBgn0037832	CG14686	CG14686	CG14686	41292	---	---	---	---
2951	144150_at	-0.650962	2.5856	-9.14596	2.2587e-10	3.50825e-09	13.3973	FBgn0026619	CG8766	tafazzin	tafazzin	36405	8415 // acyltransferase activity // inferred from electronic annotation /// 5515 // protein binding // inferred from physical interaction	8152 // metabolism // inferred from electronic annotation	16020 // membrane // inferred from electronic annotation /// 16021 // integral to membrane // inferred from electronic annotation /// 16021 // integral to membrane // non-traceable author statement	IPR002123 // Phospholipid/glycerol acyltransferase // 4.0E-16 /// IPR002123 // Phospholipid/glycerol acyltransferase // 4.0E-16 /// IPR002123 // Phospholipid/glycerol acyltransferase // 4.0E-16
10780	151979_at	-0.707343	3.79898	-9.14257	2.27816e-10	3.53455e-09	13.3887	FBgn0019960	CG6455	CG6455	CG6455	42587	---	---	5743 // mitochondrial inner membrane // inferred from sequence or structural similarity /// 5739 // mitochondrion // inferred from electronic annotation /// 16020 // membrane // inferred from electronic annotation /// 16021 // integral to membrane // inferred from electronic annotation /// 5743 // mitochondrial inner membrane // inferred from sequence similarity	---
596	141795_at	-0.523126	0.570757	-9.13926	2.29729e-10	3.56029e-09	13.3802	FBgn0051120	CG31120	CG31120	CG31120	42979	16706 // oxidoreductase activity, acting on paired donors, with incorporation or reduction of molecular oxygen, 2-oxoglutarate as one donor, and incorporation of one atom each of oxygen into both donors // inferred from electronic annotation /// 5515 // protein binding // inferred from physical interaction	19538 // protein metabolism // inferred from electronic annotation	---	---
3654	144853_at	-0.884766	2.48074	-9.13007	2.35132e-10	3.63598e-09	13.3567	FBgn0030272	CG15201	CG15201	CG15201	32053	---	---	---	---
7788	148987_at	-0.868991	2.06769	-9.12806	2.36329e-10	3.65046e-09	13.3516	FBgn0036778	CG5137	Cyp312a1	Cyp312a1	40005	4497 // monooxygenase activity // inferred from electronic annotation /// 16491 // oxidoreductase activity // inferred from electronic annotation	6118 // electron transport // inferred from electronic annotation /// 8202 // steroid metabolism // inferred from electronic annotation	5792 // microsome // non-traceable author statement /// 16020 // membrane // non-traceable author statement	IPR001128 // Cytochrome P450 // 7.6E-97
3979	145178_at	-1.64534	3.26223	-9.12601	2.37555e-10	3.66133e-09	13.3464	FBgn0030737	CG9914	CG9914	CG9914	32592	5198 // structural molecule activity // inferred from electronic annotation /// 16491 // oxidoreductase activity // inferred from electronic annotation	6629 // lipid metabolism // inferred from electronic annotation /// 6631 // fatty acid metabolism // inferred from electronic annotation /// 7010 // cytoskeleton organization and biogenesis // inferred from electronic annotation	---	IPR006108 // 3-hydroxyacyl-CoA dehydrogenase, C-terminal // 1.4E-25 /// IPR006176 // 3-hydroxyacyl-CoA dehydrogenase, NAD binding domain // 2.0E-49
8007	149206_at	-0.861445	1.7268	-9.12333	2.39172e-10	3.6822e-09	13.3395	FBgn0037126	CG14567	CG14567	CG14567	40420	---	---	---	---
4120	145319_at	-0.567648	0.302434	-9.11683	2.43135e-10	3.7391e-09	13.3229	FBgn0004959	CG6578	phm	phantom	32857	4497 // monooxygenase activity // inferred from electronic annotation /// 16491 // oxidoreductase activity // inferred from electronic annotation /// 35302 // ecdysteroid 25-hydroxylase activity // inferred from direct assay /// 5506 // iron ion binding // inferred from electronic annotation /// 20037 // heme binding // inferred from electronic annotation /// 46872 // metal ion binding // inferre…	1700 // embryonic development (sensu Insecta) // inferred from mutant phenotype /// 6118 // electron transport // inferred from electronic annotation /// 6697 // ecdysone biosynthesis // inferred from direct assay /// 8202 // steroid metabolism // inferred from electronic annotation /// 9993 // oogenesis (sensu Insecta) // inferred from mutant phenotype /// 17143 // insecticide metabolism // non-…	5783 // endoplasmic reticulum // inferred from direct assay /// 5792 // microsome // non-traceable author statement /// 16020 // membrane // non-traceable author statement /// 5783 // endoplasmic reticulum // inferred from electronic annotation /// 5792 // microsome // inferred from electronic annotation /// 16020 // membrane // inferred from electronic annotation	IPR001128 // Cytochrome P450 // 8.6E-16 /// IPR001128 // Cytochrome P450 // 7.3E-63
3647	144846_at	-0.937632	1.16177	-9.10822	2.48496e-10	3.81318e-09	13.3009	---	CG2081	---	---	---	---	---	---	---
12039	153238_at	-0.680365	1.62314	-9.10199	2.52448e-10	3.86535e-09	13.285	FBgn0052473	CG32473	CG32473	CG32473	41636	3676 // nucleic acid binding // inferred from electronic annotation /// 4179 // membrane alanyl aminopeptidase activity // inferred from electronic annotation /// 4230 // glutamyl aminopeptidase activity // inferred from sequence or structural similarity /// 4519 // endonuclease activity // inferred from electronic annotation /// 8270 // zinc ion binding // inferred from electronic annotation ///…	6508 // proteolysis // inferred from electronic annotation	---	IPR001930 // Peptidase M1, membrane alanine aminopeptidase // 1.0E-126 /// IPR001930 // Peptidase M1, membrane alanine aminopeptidase // 1.0E-126 /// IPR001930 // Peptidase M1, membrane alanine aminopeptidase // 1.0E-126
10922	152121_s_at	-0.544129	3.23849	-9.09161	2.59171e-10	3.95964e-09	13.2584	FBgn0027572	CG5009	CG5009	CG5009	37028	16401 // palmitoyl-CoA oxidase activity // inferred from sequence or structural similarity /// 5515 // protein binding // inferred from physical interaction /// 3995 // acyl-CoA dehydrogenase activity // inferred from electronic annotation /// 3997 // acyl-CoA oxidase activity // inferred from electronic annotation /// 50660 // FAD binding // inferred from electronic annotation /// 16401 // palmi…	6635 // fatty acid beta-oxidation // inferred from electronic annotation /// 6118 // electron transport // inferred from electronic annotation /// 6631 // fatty acid metabolism // inferred from electronic annotation	5777 // peroxisome // inferred from electronic annotation	IPR002655 // Acyl-CoA oxidase // 1.9E-34
10459	151658_at	-0.702632	3.46536	-9.07483	2.70434e-10	4.10486e-09	13.2155	FBgn0027356	CG8604	Amph	Amphiphysin	36383	5515 // protein binding // inferred from electronic annotation /// 5515 // protein binding // inferred from physical interaction	6886 // intracellular protein transport // inferred from electronic annotation /// 6887 // exocytosis // traceable author statement /// 6897 // endocytosis // non-traceable author statement /// 6898 // receptor mediated endocytosis // inferred from electronic annotation /// 6937 // regulation of muscle contraction // inferred from mutant phenotype /// 7269 // neurotransmitter secretion // non-tra…	5737 // cytoplasm // inferred from electronic annotation /// 5886 // plasma membrane // inferred from direct assay /// 45202 // synapse // inferred from direct assay	IPR004148 // BAR domain // 1.4E-126 /// IPR001452 // SH3 // 8.3E-15
1220	142419_at	-1.8226	2.49854	-9.07352	2.71332e-10	4.11403e-09	13.2121	FBgn0030098	CG12057	CG12057	CG12057	31854	---	---	---	---
8640	149839_f_at	-0.646662	0.524983	-9.06344	2.7836e-10	4.2024e-09	13.1863	FBgn0038148	CG14377	CG14377	CG14377	41649	---	---	---	---
13573	154772_at	-1.18943	1.5734	-9.06065	2.80338e-10	4.22771e-09	13.1791	FBgn0033782	CG3850	sug	sugarbabe	36424	3676 // nucleic acid binding // inferred from electronic annotation /// 8270 // zinc ion binding // inferred from electronic annotation /// 30528 // transcription regulator activity // inferred from electronic annotation /// 5515 // protein binding // inferred from physical interaction /// 46872 // metal ion binding // inferred from electronic annotation	6139 // nucleobase, nucleoside, nucleotide and nucleic acid metabolism // inferred from electronic annotation /// 6357 // regulation of transcription from RNA polymerase II promoter // inferred from electronic annotation /// 6366 // transcription from RNA polymerase II promoter // inferred from electronic annotation	5634 // nucleus // inferred from electronic annotation	IPR007087 // Zn-finger, C2H2 type // 9.4E-5 /// IPR007087 // Zn-finger, C2H2 type // 2.1E-6 /// IPR007087 // Zn-finger, C2H2 type // 4.4E-5 /// IPR007087 // Zn-finger, C2H2 type // 9.8E-6
6237	147436_at	-0.926067	3.40028	-9.05131	2.87066e-10	4.32451e-09	13.1552	FBgn0068150 /// FBgn0063497	CG17524	DyakGstE3 /// GstE3	GstE3 /// Glutathione S transferase E3	---	---	---	---	IPR004046 // Glutathione S-transferase, C-terminal // 1.9E-11 /// IPR004045 // Glutathione S-transferase, N-terminal // 3.7E-20
7635	148834_at	-0.746361	0.89999	-9.04712	2.90132e-10	4.366e-09	13.1444	FBgn0036547	CG17032	CG17032	CG17032	39736	5515 // protein binding // inferred from physical interaction	---	---	---
2001	143200_at	-0.689967	3.44627	-9.03892	2.96244e-10	4.44842e-09	13.1234	FBgn0001250	CG9623	if	inflated	32661	4872 // receptor activity // inferred from direct assay /// 4872 // receptor activity // inferred from sequence or structural similarity /// 5515 // protein binding // traceable author statement /// 50839 // cell adhesion molecule binding // inferred from direct assay /// 50839 // cell adhesion molecule binding // inferred from sequence or structural similarity /// 4872 // receptor activity // in…	7155 // cell adhesion // inferred from direct assay /// 7155 // cell adhesion // inferred from mutant phenotype /// 7157 // heterophilic cell adhesion // traceable author statement /// 7160 // cell-matrix adhesion // inferred from sequence or structural similarity /// 7411 // axon guidance // inferred from mutant phenotype /// 7426 // tracheal outgrowth (sensu Insecta) // traceable author stateme…	8305 // integrin complex // inferred from sequence or structural similarity /// 8305 // integrin complex // non-traceable author statement /// 8305 // integrin complex // traceable author statement /// 43292 // contractile fiber // inferred from direct assay /// 8305 // integrin complex // inferred from electronic annotation /// 16020 // membrane // inferred from electronic annotation /// 16021 /…	IPR000413 // Integrins alpha chain // 2.6E-7 /// IPR000413 // Integrins alpha chain // 2.3E-5 /// IPR000413 // Integrins alpha chain // 6.1E-12 /// IPR000413 // Integrins alpha chain // 4.2E-6 /// IPR000413 // Integrins alpha chain // 3.1E-6 /// IPR000413 // Integrins alpha chain // 2.6E-7 /// IPR000413 // Integrins alpha chain // 2.3E-5 /// IPR000413 // Integrins alpha chain // 6.1E-12 /// IPR00…
2064	143263_at	-0.878144	4.80879	-9.02414	3.07584e-10	4.58264e-09	13.0854	FBgn0002741	CG17927	Mhc	Myosin heavy chain	35007	146 // microfilament motor activity // inferred from sequence or structural similarity /// 5200 // structural constituent of cytoskeleton // inferred from electronic annotation /// 5524 // ATP binding // inferred from electronic annotation /// 8092 // cytoskeletal protein binding // inferred from electronic annotation /// 8307 // structural constituent of muscle // traceable author statement /// …	910 // cytokinesis // inferred from electronic annotation /// 6941 // striated muscle contraction // traceable author statement /// 7067 // mitosis // inferred from electronic annotation /// 30239 // myofibril assembly // inferred from mutant phenotype	5859 // muscle myosin // inferred from direct assay /// 5859 // muscle myosin // inferred from sequence or structural similarity /// 5863 // striated muscle thick filament // inferred from direct assay /// 16459 // myosin // inferred from sequence or structural similarity /// 5859 // muscle myosin // inferred from sequence similarity /// 16459 // myosin // inferred from sequence similarity	IPR004009 // Myosin N-terminal SH3-like domain // 1.2E-17 /// IPR001609 // Myosin head (motor domain) // 1.0E-126 /// IPR002928 // Myosin tail // 1.0E-126 /// IPR001609 // Myosin head (motor domain) // 1.0E-126 /// IPR002928 // Myosin tail // 1.0E-126 /// IPR004009 // Myosin N-terminal SH3-like domain // 1.0E-19
8018	149217_at	-0.711536	0.848146	-9.02313	3.0837e-10	4.58377e-09	13.0829	FBgn0037144	CG7458	CG7458	CG7458	40441	8513 // organic cation porter activity // inferred from sequence or structural similarity /// 15144 // carbohydrate transporter activity // inferred from electronic annotation /// 5215 // transporter activity // inferred from electronic annotation /// 8513 // organic cation porter activity // inferred from sequence similarity	5975 // carbohydrate metabolism // inferred from electronic annotation /// 6812 // cation transport // inferred from electronic annotation /// 6858 // extracellular transport // inferred from electronic annotation /// 8643 // carbohydrate transport // inferred from electronic annotation /// 6810 // transport // inferred from electronic annotation	16020 // membrane // inferred from electronic annotation /// 16021 // integral to membrane // inferred from electronic annotation	IPR005828 // General substrate transporter // 8.0E-9 /// IPR005828 // General substrate transporter // 1.2E-5
5011	146210_at	-0.68596	2.08489	-9.02188	3.09358e-10	4.59122e-09	13.0796	FBgn0032318	CG14072	CG14072	CG14072	34513	---	---	---	---
2673	143872_at	-0.917685	1.9203	-9.01848	3.12044e-10	4.62617e-09	13.0709	FBgn0016123	CG1462	Aph-4	Alkaline phosphatase 4	43671	4035 // alkaline phosphatase activity // inferred from sequence or structural similarity /// 4035 // alkaline phosphatase activity // non-traceable author statement /// 19204 // nucleotide phosphatase activity // inferred from electronic annotation /// 287 // magnesium ion binding // inferred from electronic annotation /// 4035 // alkaline phosphatase activity // inferred from electronic annotati…	1501 // skeletal development // inferred from electronic annotation /// 7399 // nervous system development // inferred from expression pattern /// 7498 // mesoderm development // inferred from electronic annotation /// 8152 // metabolism // inferred from electronic annotation /// 42045 // epithelial fluid transport // inferred from mutant phenotype	46658 // anchored to plasma membrane // inferred from sequence or structural similarity /// 16020 // membrane // inferred from electronic annotation /// 16021 // integral to membrane // inferred from electronic annotation /// 46658 // anchored to plasma membrane // inferred from sequence similarity	IPR001952 // Alkaline phosphatase // 3.0E-77 /// IPR001952 // Alkaline phosphatase // 9.8E-89
6008	147207_at	-0.847313	1.48336	-9.01736	3.1293e-10	4.6344e-09	13.068	FBgn0033942	CG10112	CG10112	CG10112	36613	42302 // structural constituent of cuticle // inferred from electronic annotation /// 5515 // protein binding // inferred from physical interaction	---	---	IPR000618 // Insect cuticle protein // 0.0077
6267	147466_at	-0.78141	-0.116769	-9.01619	3.13867e-10	4.64337e-09	13.065	FBgn0034391	CG15080	CG15080	CG15080	37167	---	---	---	---
5348	146547_at	-0.715077	3.55068	-9.00501	3.22918e-10	4.75719e-09	13.0363	FBgn0032868	CG17472	CG17472	CG17472	35320	---	---	---	---
13184	154383_at	-0.541728	2.74543	-8.99173	3.34024e-10	4.90018e-09	13.0022	FBgn0032721	CG10602	CG10602	CG10602	35146	4179 // membrane alanyl aminopeptidase activity // inferred from electronic annotation /// 4463 // leukotriene-A4 hydrolase activity // inferred from sequence or structural similarity /// 8237 // metallopeptidase activity // inferred from electronic annotation /// 8270 // zinc ion binding // inferred from electronic annotation /// 4463 // leukotriene-A4 hydrolase activity // inferred from sequenc…	6508 // proteolysis // inferred from electronic annotation /// 6952 // defense response // inferred from electronic annotation /// 7166 // cell surface receptor linked signal transduction // inferred from electronic annotation	---	IPR001930 // Peptidase M1, membrane alanine aminopeptidase // 4.6E-110 /// IPR001930 // Peptidase M1, membrane alanine aminopeptidase // 4.6E-110
11263	152462_at	-0.740822	1.6051	-8.9851	3.39718e-10	4.97331e-09	12.9851	FBgn0031865	CG10806	CG10806	CG10806	33961	15299 // solute:hydrogen antiporter activity // inferred from electronic annotation /// 15385 // sodium:hydrogen antiporter activity // inferred from sequence or structural similarity /// 15385 // sodium:hydrogen antiporter activity // inferred from sequence similarity	6885 // regulation of pH // inferred from electronic annotation /// 6810 // transport // inferred from electronic annotation	16021 // integral to membrane // inferred from electronic annotation	IPR006153 // Sodium/hydrogen exchanger // 2.1E-13 /// IPR006153 // Sodium/hydrogen exchanger // 2.1E-13
6534	147733_r_at	-0.650342	0.650592	-8.98013	3.44042e-10	5.03134e-09	12.9723	FBgn0034809	CG13542	CG13542	CG13542	37653	---	---	---	---
2404	143603_i_at	-1.38314	2.88584	-8.97666	3.47102e-10	5.0708e-09	12.9634	FBgn0050031 /// FBgn0010359 /// FBgn0010358	CG30028 /// CG30031 /// CG12351	CG30031 /// Try	CG30031 /// Trypsin /// Trypsin	246404 /// 36221 /// 48343	4252 // serine-type endopeptidase activity // non-traceable author statement /// 4263 // chymotrypsin activity // inferred from electronic annotation /// 4295 // trypsin activity // inferred from electronic annotation /// 4295 // trypsin activity // non-traceable author statement /// 4295 // trypsin activity // inferred from sequence or structural similarity /// 19899 // enzyme binding // inferre…	6508 // proteolysis // inferred from electronic annotation /// 6508 // proteolysis // non-traceable author statement /// 6508 // proteolysis // inferred from sequence or structural similarity /// 30422 // RNA interference, production of siRNA // inferred from mutant phenotype /// 30423 // RNA interference, targeting of mRNA for destruction // inferred from mutant phenotype /// 35196 // miRNA-medi…	5576 // extracellular region // non-traceable author statement /// 5576 // extracellular region // inferred from sequence or structural similarity /// 5576 // extracellular region // inferred from sequence similarity	IPR001254 // Peptidase S1, chymotrypsin // 1.7E-85
1716	142915_at	-0.761354	-0.124665	-8.9746	3.4893e-10	5.0922e-09	12.9581	FBgn0023524	CG3078	CG3078	CG3078	31211	4965 // GABA-B receptor activity // inferred from sequence or structural similarity /// 4965 // GABA-B receptor activity // inferred from sequence similarity	---	---	---
11977	153176_at	-0.537749	1.17155	-8.95367	3.68056e-10	5.33796e-09	12.9042	FBgn0031231	CG11488	mRpL10	mitochondrial ribosomal protein L10	33182	3735 // structural constituent of ribosome // inferred from sequence or structural similarity /// 3735 // structural constituent of ribosome // inferred from sequence similarity	6412 // protein biosynthesis // inferred from sequence or structural similarity /// 6412 // protein biosynthesis // inferred from sequence similarity	5762 // mitochondrial large ribosomal subunit // inferred from sequence or structural similarity /// 5762 // mitochondrial large ribosomal subunit // inferred from sequence similarity	---
10536	151735_at	-0.790808	2.99708	-8.94491	3.76387e-10	5.4475e-09	12.8816	FBgn0003731	---	Egfr	Epidermal growth factor receptor	37455	4713 // protein-tyrosine kinase activity // non-traceable author statement /// 4888 // transmembrane receptor activity // traceable author statement /// 5006 // epidermal growth factor receptor activity // inferred from sequence or structural similarity /// 5006 // epidermal growth factor receptor activity // traceable author statement /// 5524 // ATP binding // inferred from electronic annotatio…	86 // G2/M transition of mitotic cell cycle // traceable author statement /// 578 // embryonic axis specification // non-traceable author statement /// 1654 // eye development // inferred from mutant phenotype /// 1709 // cell fate determination // traceable author statement /// 1742 // oenocyte differentiation // traceable author statement /// 1745 // compound eye morphogenesis (sensu Endopteryg…	5886 // plasma membrane // traceable author statement /// 5887 // integral to plasma membrane // non-traceable author statement /// 16020 // membrane // inferred from electronic annotation /// 16021 // integral to membrane // inferred from electronic annotation	IPR006211 // Furin-like cysteine rich region // 2.4E-91 /// IPR000719 // Protein kinase // 1.2E-91 /// IPR000494 // Epidermal growth-factor receptor (EGFR), L domain // 1.3E-38 /// IPR000494 // Epidermal growth-factor receptor (EGFR), L domain // 4.0E-47
3825	145024_at	-0.587278	0.817076	-8.94435	3.7692e-10	5.44959e-09	12.8801	FBgn0030509	CG11162	CG11162	CG11162	32325	254 // C-4 methylsterol oxidase activity // inferred from sequence or structural similarity /// 254 // C-4 methylsterol oxidase activity // inferred from sequence similarity	8203 // cholesterol metabolism // inferred from electronic annotation	---	IPR006088 // Sterol desaturase // 1.1E-46
1174	142373_at	-0.8667	0.457681	-8.9384	3.82691e-10	5.51256e-09	12.8648	FBgn0038348	CG18519	CG18519	CG18519	41895	16491 // oxidoreductase activity // inferred from electronic annotation	6118 // electron transport // inferred from electronic annotation /// 6139 // nucleobase, nucleoside, nucleotide and nucleic acid metabolism // inferred from electronic annotation /// 6144 // purine base metabolism // inferred from electronic annotation /// 6800 // oxygen and reactive oxygen species metabolism // inferred from electronic annotation /// 6952 // defense response // inferred from el…	---	IPR008274 // Aldehyde oxidase and xanthine dehydrogenase, molybdopterin binding // 9.7E-19 /// IPR008274 // Aldehyde oxidase and xanthine dehydrogenase, molybdopterin binding // 1.1E-4 /// IPR008274 // Aldehyde oxidase and xanthine dehydrogenase, molybdopterin binding // 1.7E-76 /// IPR002346 // Molybdopterin dehydrogenase, FAD-binding // 2.5E-7 /// IPR000674 // Aldehyde oxidase and xanthine dehy…
1311	142510_at	-0.804043	1.15264	-8.93824	3.82849e-10	5.51256e-09	12.8644	FBgn0024556	CG6050	EfTuM	Elongation factor Tu mitochondrial	44438	3746 // translation elongation factor activity // inferred from sequence or structural similarity /// 3747 // translation release factor activity // inferred from electronic annotation /// 5525 // GTP binding // inferred from electronic annotation /// 5515 // protein binding // inferred from physical interaction /// 3677 // DNA binding // inferred from direct assay /// 166 // nucleotide binding /…	6414 // translational elongation // inferred from sequence or structural similarity /// 6445 // regulation of translation // inferred from electronic annotation /// 122 // negative regulation of transcription from RNA polymerase II promoter // inferred from mutant phenotype /// 6412 // protein biosynthesis // inferred from electronic annotation /// 6414 // translational elongation // inferred fro…	5739 // mitochondrion // inferred from sequence or structural similarity /// 785 // chromatin // inferred from direct assay /// 31523 // Myb complex // inferred from direct assay /// 5622 // intracellular // inferred from electronic annotation /// 5739 // mitochondrion // inferred from sequence similarity	IPR004161 // Elongation factor Tu, domain 2 // 1.3E-24 /// IPR000795 // Protein synthesis factor, GTP-binding // 1.5E-87 /// IPR004160 // Elongation factor Tu, C-terminal // 5.8E-39
2731	143930_at	-1.20052	3.06428	-8.93153	3.89467e-10	5.59061e-09	12.8471	FBgn0020509	CG1262	Acp62F	Accessory gland peptide 62F	38340	4867 // serine-type endopeptidase inhibitor activity // inferred from direct assay /// 4867 // serine-type endopeptidase inhibitor activity // inferred from sequence or structural similarity /// 30414 // protease inhibitor activity // traceable author statement /// 4867 // serine-type endopeptidase inhibitor activity // inferred from sequence similarity	7582 // physiological process // non-traceable author statement /// 8340 // determination of adult life span // non-traceable author statement /// 30162 // regulation of proteolysis // traceable author statement /// 45297 // post-mating behavior // non-traceable author statement /// 45861 // negative regulation of proteolysis // inferred from sequence or structural similarity /// 45861 // negativ…	---	IPR002919 // Trypsin inhibitor-like, cysteine-rich TIL region // 1.4E-20
4213	145412_at	-0.725379	2.29472	-8.93062	3.90376e-10	5.59792e-09	12.8447	FBgn0031087	CG12656	CG12656	CG12656	33011	5515 // protein binding // inferred from physical interaction	---	---	---
11614	152813_at	-0.69405	1.46848	-8.91737	4.03817e-10	5.77293e-09	12.8105	FBgn0031800	CG9497	CG9497	CG9497	33884	16301 // kinase activity // inferred from electronic annotation /// 16740 // transferase activity // inferred from electronic annotation	---	---	IPR004119 // Protein of unknown function DUF227 // 1.8E-85
1596	142795_at	-0.654849	0.81365	-8.91203	4.09371e-10	5.83447e-09	12.7967	FBgn0034141	CG8311	CG8311	CG8311	36856	4168 // dolichol kinase activity // inferred from sequence or structural similarity /// 4605 // phosphatidate cytidylyltransferase activity // inferred from electronic annotation /// 4168 // dolichol kinase activity // inferred from sequence similarity	8654 // phospholipid biosynthesis // inferred from electronic annotation	16020 // membrane // inferred from electronic annotation	---
9331	150530_at	-0.513187	1.3686	-8.89518	4.27406e-10	6.05547e-09	12.7532	---	---	---	---	---	---	---	---	---
11461	152660_at	-0.632252	0.884435	-8.86916	4.56861e-10	6.43278e-09	12.6859	FBgn0030777	CG9672	CG9672	CG9672	32651	4252 // serine-type endopeptidase activity // non-traceable author statement /// 4263 // chymotrypsin activity // inferred from electronic annotation /// 4295 // trypsin activity // inferred from electronic annotation /// 4252 // serine-type endopeptidase activity // inferred from electronic annotation	6508 // proteolysis // inferred from electronic annotation	---	IPR001254 // Peptidase S1, chymotrypsin // 6.6E-31
1212	142411_at	-0.715933	-0.278002	-8.86746	4.58854e-10	6.45436e-09	12.6815	FBgn0038794	CG17205	CG17205	CG17205	42420	---	---	---	---
5610	146809_at	-1.98609	3.68816	-8.86	4.67709e-10	6.55916e-09	12.6622	FBgn0033296	CG11669	CG11669	CG11669	35829	4556 // alpha-amylase activity // inferred from electronic annotation /// 4558 // alpha-glucosidase activity // inferred from sequence or structural similarity /// 4558 // alpha-glucosidase activity // inferred from sequence similarity	5975 // carbohydrate metabolism // inferred from electronic annotation	---	IPR006047 // Alpha amylase, catalytic domain // 1.1E-112
11451	152650_at	-0.598145	1.37422	-8.85806	4.70041e-10	6.5787e-09	12.6571	FBgn0032495	CG16820	CG16820	CG16820	34730	---	---	---	IPR004272 // Odorant binding protein // 2.6E-44
4991	146190_at	-0.846255	1.66799	-8.85658	4.71836e-10	6.59723e-09	12.6533	FBgn0032297	CG17124	CG17124	CG17124	34485	4864 // protein phosphatase inhibitor activity // non-traceable author statement /// 5515 // protein binding // inferred from physical interaction	---	---	---
4044	145243_at	-0.764122	1.64767	-8.85264	4.76619e-10	6.64421e-09	12.6431	FBgn0030837	CG8661	CG8661	CG8661	32720	---	---	---	---
4249	145448_at	-0.771149	0.512899	-8.85129	4.78274e-10	6.66065e-09	12.6396	FBgn0031139	CG11227	CG11227	CG11227	33071	---	---	---	---
12141	153340_at	-0.565052	3.27962	-8.84648	4.84214e-10	6.73668e-09	12.6271	FBgn0020255	CG1404	ran	ran	44072	3924 // GTPase activity // inferred from sequence or structural similarity /// 5515 // protein binding // inferred from physical interaction /// 5525 // GTP binding // inferred from electronic annotation /// 5525 // GTP binding // inferred from direct assay /// 166 // nucleotide binding // inferred from electronic annotation /// 3924 // GTPase activity // inferred from sequence similarity	6403 // RNA localization // inferred from electronic annotation /// 6605 // protein targeting // inferred from electronic annotation /// 7015 // actin filament organization // inferred from mutant phenotype /// 7049 // cell cycle // inferred from electronic annotation /// 7155 // cell adhesion // inferred from mutant phenotype /// 7264 // small GTPase mediated signal transduction // inferred from…	5737 // cytoplasm // inferred from direct assay /// 5880 // nuclear microtubule // inferred from direct assay /// 178 // exosome (RNase complex) // inferred from electronic annotation /// 5634 // nucleus // inferred from electronic annotation	IPR001806 // Ras GTPase superfamily // 1.4E-67
11982	153181_at	-0.607585	1.13843	-8.8207	5.17348e-10	7.16919e-09	12.5603	FBgn0031479	CG3083	Prx6005	Peroxiredoxin 6005	33493	4601 // peroxidase activity // non-traceable author statement /// 4602 // glutathione peroxidase activity // inferred from sequence or structural similarity /// 16209 // antioxidant activity // inferred from sequence or structural similarity /// 16209 // antioxidant activity // non-traceable author statement /// 4601 // peroxidase activity // inferred from electronic annotation /// 16209 // antio…	6800 // oxygen and reactive oxygen species metabolism // inferred from electronic annotation /// 6952 // defense response // inferred from electronic annotation /// 45454 // cell redox homeostasis // inferred from sequence or structural similarity /// 45454 // cell redox homeostasis // inferred from sequence similarity	---	IPR000866 // Alkyl hydroperoxide reductase/ Thiol specific antioxidant/ Mal allergen // 4.0E-60 /// IPR000866 // Alkyl hydroperoxide reductase/ Thiol specific antioxidant/ Mal allergen // 9.6E-60
6069	147268_at	-0.739172	1.16247	-8.82007	5.18186e-10	7.1737e-09	12.5587	FBgn0034053	CG8302	Cyp4aa1	Cyp4aa1	36752	4497 // monooxygenase activity // inferred from electronic annotation /// 16491 // oxidoreductase activity // inferred from electronic annotation	6118 // electron transport // inferred from electronic annotation /// 8202 // steroid metabolism // inferred from electronic annotation /// 42445 // hormone metabolism // non-traceable author statement /// 46701 // insecticide catabolism // non-traceable author statement	5792 // microsome // non-traceable author statement /// 16020 // membrane // non-traceable author statement	IPR001128 // Cytochrome P450 // 2.1E-87
11148	152347_at	-1.02193	2.97396	-8.81932	5.19184e-10	7.18043e-09	12.5567	FBgn0039628	CG11841	CG11841	CG11841	43430	4252 // serine-type endopeptidase activity // inferred from sequence or structural similarity /// 4263 // chymotrypsin activity // inferred from electronic annotation /// 4295 // trypsin activity // non-traceable author statement /// 4252 // serine-type endopeptidase activity // inferred from electronic annotation /// 4252 // serine-type endopeptidase activity // inferred from sequence similarity	6508 // proteolysis // non-traceable author statement /// 6508 // proteolysis // inferred from electronic annotation	---	IPR001254 // Peptidase S1, chymotrypsin // 2.1E-47 /// IPR001254 // Peptidase S1, chymotrypsin // 3.6E-26
1177	142376_at	-0.643865	0.761065	-8.81654	5.22908e-10	7.2248e-09	12.5495	FBgn0052983	CG32983	CG32983	CG32983	50434	---	---	---	---
2692	143891_at	-0.551934	1.04681	-8.81151	5.29712e-10	7.29722e-09	12.5365	FBgn0017482	CG3425	T3dh	Type III alcohol dehydrogenase	37551	4022 // alcohol dehydrogenase activity // non-traceable author statement /// 5506 // iron ion binding // inferred from electronic annotation /// 3934 // GTP cyclohydrolase I activity // inferred from electronic annotation /// 16491 // oxidoreductase activity // inferred from electronic annotation	5975 // carbohydrate metabolism // inferred from electronic annotation /// 7277 // pole cell development // inferred from mutant phenotype /// 8152 // metabolism // inferred from electronic annotation /// 9058 // biosynthesis // inferred from electronic annotation /// 8354 // germ cell migration // traceable author statement	18994 // polar granule // traceable author statement /// 45495 // pole plasm // traceable author statement	IPR001670 // Iron-containing alcohol dehydrogenase // 6.9E-29 /// IPR001670 // Iron-containing alcohol dehydrogenase // 1.1E-14
152	141351_at	-0.993641	1.87684	-8.80225	5.42481e-10	7.42928e-09	12.5124	FBgn0004167	CG12008	kst	karst	38418	3779 // actin binding // inferred from direct assay /// 3779 // actin binding // inferred from sequence or structural similarity /// 5200 // structural constituent of cytoskeleton // inferred from electronic annotation /// 8017 // microtubule binding // inferred from direct assay /// 8092 // cytoskeletal protein binding // inferred from sequence or structural similarity /// 3779 // actin binding …	910 // cytokinesis // inferred from mutant phenotype /// 6364 // rRNA processing // inferred from electronic annotation /// 7009 // plasma membrane organization and biogenesis // traceable author statement /// 7010 // cytoskeleton organization and biogenesis // inferred from electronic annotation /// 30707 // ovarian follicle cell development (sensu Insecta) // traceable author statement /// 4518…	8091 // spectrin // inferred from sequence or structural similarity /// 16327 // apicolateral plasma membrane // traceable author statement /// 8091 // spectrin // inferred from sequence similarity	IPR001452 // SH3 // 4.8E-10 /// IPR001715 // Calponin-like actin-binding // 4.9E-31 /// IPR001715 // Calponin-like actin-binding // 3.2E-35 /// IPR001849 // Pleckstrin-like // 7.6E-20 /// IPR002017 // Spectrin repeat // 2.9E-4 /// IPR002017 // Spectrin repeat // 7.6E-13 /// IPR002017 // Spectrin repeat // 1.1E-11 /// IPR002017 // Spectrin repeat // 2.0E-21 /// IPR002017 // Spectrin repeat // 1.4E…
6381	147580_at	-0.556173	0.263414	-8.7958	5.51553e-10	7.54615e-09	12.4957	FBgn0050295	CG30295	Ipk1	Ipk1	37360	35299 // inositol pentakisphosphate 2-kinase activity // inferred from mutant phenotype /// 166 // nucleotide binding // inferred from electronic annotation /// 5524 // ATP binding // inferred from electronic annotation /// 16301 // kinase activity // inferred from electronic annotation /// 16740 // transferase activity // inferred from electronic annotation	46853 // inositol and derivative phosphorylation // inferred from mutant phenotype	5634 // nucleus // inferred from electronic annotation	IPR009286 // Protein of unknown function DUF941 // 1.0E-126
1255	142454_at	-0.547661	1.33531	-8.78037	5.73894e-10	7.82126e-09	12.4556	FBgn0011787	CG5012	mRpL12	mitochondrial ribosomal protein L12	44326	3729 // mRNA binding // inferred from electronic annotation /// 3735 // structural constituent of ribosome // inferred from sequence or structural similarity /// 5515 // protein binding // inferred from physical interaction /// 3735 // structural constituent of ribosome // inferred from electronic annotation /// 3735 // structural constituent of ribosome // inferred from sequence similarity	6412 // protein biosynthesis // inferred from sequence or structural similarity /// 7005 // mitochondrion organization and biogenesis // inferred from mutant phenotype /// 16049 // cell growth // inferred from mutant phenotype /// 6412 // protein biosynthesis // inferred from electronic annotation /// 6412 // protein biosynthesis // inferred from sequence similarity	5762 // mitochondrial large ribosomal subunit // inferred from sequence or structural similarity /// 5763 // mitochondrial small ribosomal subunit // inferred from sequence or structural similarity /// 5622 // intracellular // inferred from electronic annotation /// 5840 // ribosome // inferred from electronic annotation /// 5762 // mitochondrial large ribosomal subunit // inferred from sequence …	IPR000206 // Ribosomal protein L7/L12 // 1.6E-8
1020	142219_at	-0.887468	2.49334	-8.76915	5.9072e-10	8.0116e-09	12.4264	FBgn0033366	CG8196	Ance-4	Ance-4	35909	4246 // peptidyl-dipeptidase A activity // non-traceable author statement /// 4246 // peptidyl-dipeptidase A activity // inferred from electronic annotation	6508 // proteolysis // inferred from electronic annotation	16020 // membrane // inferred from electronic annotation	IPR001548 // Peptidase M2, peptidyl-dipeptidase A // 1.0E-11 /// IPR001548 // Peptidase M2, peptidyl-dipeptidase A // 3.7E-18
11316	152515_at	-0.899651	4.85957	-8.76849	5.91718e-10	8.01738e-09	12.4247	FBgn0003074	CG8251	Pgi	Phosphoglucose isomerase	35886	4347 // glucose-6-phosphate isomerase activity // non-traceable author statement /// 4616 // phosphogluconate dehydrogenase (decarboxylating) activity // inferred from sequence or structural similarity /// 4616 // phosphogluconate dehydrogenase (decarboxylating) activity // traceable author statement /// 4347 // glucose-6-phosphate isomerase activity // inferred from electronic annotation /// 168…	6094 // gluconeogenesis // non-traceable author statement /// 6096 // glycolysis // non-traceable author statement /// 6094 // gluconeogenesis // inferred from electronic annotation /// 6096 // glycolysis // inferred from electronic annotation	5737 // cytoplasm // non-traceable author statement	IPR001672 // Phosphoglucose isomerase (PGI) // 1.0E-126
5230	146429_at	-1.17909	2.15953	-8.76734	5.93474e-10	8.0334e-09	12.4217	FBgn0032669	CG15155	CG15155	CG15155	35087	---	---	---	IPR000182 // GCN5-related N-acetyltransferase // 1.1E-5
10979	152178_at	-0.604665	1.28218	-8.75576	6.11459e-10	8.26886e-09	12.3915	FBgn0037723	CG8327	SpdS	Spermidine Synthase	41167	4766 // spermidine synthase activity // inferred from sequence or structural similarity /// 8757 // S-adenosylmethionine-dependent methyltransferase activity // inferred from electronic annotation /// 3824 // catalytic activity // inferred from electronic annotation /// 16740 // transferase activity // inferred from electronic annotation /// 4766 // spermidine synthase activity // inferred from s…	8295 // spermidine biosynthesis // inferred from sequence or structural similarity /// 8295 // spermidine biosynthesis // inferred from sequence similarity	---	IPR001045 // Spermine synthase // 2.4E-118 /// IPR001045 // Spermine synthase // 1.3E-82
11346	152545_at	-0.531811	3.46034	-8.74651	6.26213e-10	8.45206e-09	12.3675	FBgn0033663	CG8983	ERp60	ERp60	36270	3756 // protein disulfide isomerase activity // inferred from electronic annotation /// 3756 // protein disulfide isomerase activity // inferred from sequence or structural similarity /// 5515 // protein binding // inferred from physical interaction /// 16853 // isomerase activity // inferred from electronic annotation /// 3756 // protein disulfide isomerase activity // inferred from sequence sim…	6118 // electron transport // inferred from electronic annotation /// 6457 // protein folding // inferred from sequence or structural similarity /// 6464 // protein modification // inferred from electronic annotation /// 6457 // protein folding // inferred from sequence similarity	5783 // endoplasmic reticulum // inferred from electronic annotation	IPR006662 // Thioredoxin type domain // 1.3E-44 /// IPR006662 // Thioredoxin type domain // 7.8E-43 /// IPR006662 // Thioredoxin type domain // 1.3E-44
6075	147274_at	-0.536396	2.68427	-8.73208	6.49961e-10	8.74731e-09	12.3299	FBgn0034066	CG8397	CG8397	CG8397	36767	3779 // actin binding // inferred from sequence or structural similarity /// 3779 // actin binding // inferred from sequence similarity	---	---	---
1238	142437_at	-0.665276	0.690916	-8.72769	6.57368e-10	8.82158e-09	12.3184	FBgn0011283	CG6641	Pbprp5	Pheromone-binding protein-related protein 5	34031	5550 // pheromone binding // inferred from sequence or structural similarity /// 5550 // pheromone binding // non-traceable author statement /// 8145 // phenylalkylamine binding // non-traceable author statement /// 16491 // oxidoreductase activity // inferred from electronic annotation /// 5549 // odorant binding // inferred from electronic annotation /// 5550 // pheromone binding // inferred fr…	6810 // transport // inferred from electronic annotation /// 8152 // metabolism // inferred from electronic annotation	5576 // extracellular region // non-traceable author statement	IPR006170 // Pheromone/general odorant binding protein, PBP/GOBP // 9.0E-28
10454	151653_at	-0.723528	2.12871	-8.72059	6.69532e-10	8.95905e-09	12.2999	FBgn0043904	CG31761	bru-2	bruno-2	250811	3729 // mRNA binding // inferred from sequence or structural similarity /// 4747 // ribokinase activity // inferred from electronic annotation /// 166 // nucleotide binding // inferred from electronic annotation /// 3676 // nucleic acid binding // inferred from electronic annotation /// 3729 // mRNA binding // inferred from sequence similarity	6397 // mRNA processing // inferred from electronic annotation /// 19538 // protein metabolism // inferred from electronic annotation /// 6014 // D-ribose metabolism // inferred from electronic annotation	---	IPR000504 // RNA-binding region RNP-1 (RNA recognition motif) // 2.1E-11 /// IPR000504 // RNA-binding region RNP-1 (RNA recognition motif) // 2.1E-15 /// IPR000504 // RNA-binding region RNP-1 (RNA recognition motif) // 2.2E-20
11549	152748_at	-1.89052	3.64767	-8.72022	6.7017e-10	8.95905e-09	12.299	FBgn0030157	CG1468	CG1468	CG1468	31920	---	---	---	---
11764	152963_at	-0.928956	2.14812	-8.71629	6.77001e-10	9.04174e-09	12.2887	FBgn0017561	CG1615	Ork1	Open rectifier K<up>+</up> channel 1	32020	5242 // inward rectifier potassium channel activity // non-traceable author statement /// 5267 // potassium channel activity // non-traceable author statement /// 15271 // outward rectifier potassium channel activity // non-traceable author statement /// 5515 // protein binding // inferred from physical interaction /// 5267 // potassium channel activity // inferred from electronic annotation /// …	6813 // potassium ion transport // non-traceable author statement /// 19226 // transmission of nerve impulse // inferred from electronic annotation /// 6813 // potassium ion transport // inferred from electronic annotation /// 6810 // transport // inferred from electronic annotation /// 6811 // ion transport // inferred from electronic annotation	5886 // plasma membrane // inferred from sequence or structural similarity /// 5886 // plasma membrane // non-traceable author statement /// 16020 // membrane // inferred from electronic annotation /// 16021 // integral to membrane // inferred from electronic annotation /// 5886 // plasma membrane // inferred from sequence similarity	---
10747	151946_at	-0.648078	2.60985	-8.69003	7.24549e-10	9.64917e-09	12.2202	FBgn0014000 /// FBgn0068106	CG10658	Os9 /// DyakOs9	Olfactory-specific 9 /// Os9	44038	---	---	5634 // nucleus // inferred from direct assay	---
11372	152571_at	-0.519272	1.34825	-8.68748	7.29339e-10	9.70374e-09	12.2135	FBgn0038115	CG7966	CG7966	CG7966	41610	8430 // selenium binding // inferred from sequence or structural similarity /// 8430 // selenium binding // inferred from electronic annotation /// 8430 // selenium binding // inferred from sequence similarity	6952 // defense response // inferred from electronic annotation	---	IPR008826 // 56kDa selenium binding // 1.0E-126
10908	152107_at	-0.588939	1.90397	-8.67945	7.4465e-10	9.86996e-09	12.1925	FBgn0033075	CG12110	Pld	Phospholipase D	35554	4630 // phospholipase D activity // inferred from sequence or structural similarity /// 5515 // protein binding // inferred from electronic annotation /// 35091 // phosphoinositide binding // inferred from electronic annotation /// 3824 // catalytic activity // inferred from electronic annotation /// 4630 // phospholipase D activity // inferred from sequence similarity	6644 // phospholipid metabolism // inferred from electronic annotation /// 7165 // signal transduction // inferred from electronic annotation /// 7242 // intracellular signaling cascade // inferred from electronic annotation /// 8152 // metabolism // inferred from electronic annotation	---	---
9431	150630_at	-0.358236	0.721866	-8.67596	7.51416e-10	9.95022e-09	12.1834	FBgn0051090	CG31090	CG31090	CG31090	43136	8324 // cation transporter activity // inferred from electronic annotation /// 8523 // sodium-dependent multivitamin transporter activity // inferred from sequence or structural similarity /// 5515 // protein binding // inferred from physical interaction /// 5215 // transporter activity // inferred from electronic annotation /// 8523 // sodium-dependent multivitamin transporter activity // inferr…	6520 // amino acid metabolism // inferred from electronic annotation /// 6732 // coenzyme metabolism // inferred from electronic annotation /// 6812 // cation transport // inferred from electronic annotation /// 6858 // extracellular transport // inferred from electronic annotation /// 6865 // amino acid transport // inferred from electronic annotation /// 51180 // vitamin transport // inferred f…	16021 // integral to membrane // inferred from sequence or structural similarity /// 16020 // membrane // inferred from electronic annotation /// 16021 // integral to membrane // inferred from electronic annotation /// 16021 // integral to membrane // inferred from sequence similarity	IPR001734 // Na+/solute symporter // 2.3E-8
1300	142499_at	-0.755767	2.47116	-8.65925	7.8464e-10	1.0351e-08	12.1397	FBgn0019830	CG3057	colt	congested-like trachea	33470	5215 // transporter activity // inferred from sequence or structural similarity /// 5215 // transporter activity // non-traceable author statement /// 5476 // carnitine:acyl carnitine antiporter activity // inferred from sequence or structural similarity /// 5488 // binding // inferred from electronic annotation /// 5215 // transporter activity // inferred from electronic annotation /// 5215 // t…	6629 // lipid metabolism // inferred from electronic annotation /// 6839 // mitochondrial transport // inferred from sequence or structural similarity /// 6844 // acyl carnitine transport // inferred from sequence or structural similarity /// 6869 // lipid transport // inferred from electronic annotation /// 15879 // carnitine transport // inferred from sequence or structural similarity /// 6810 …	5740 // mitochondrial envelope // inferred from sequence or structural similarity /// 5740 // mitochondrial envelope // non-traceable author statement /// 5743 // mitochondrial inner membrane // inferred from sequence or structural similarity /// 5739 // mitochondrion // inferred from electronic annotation /// 5743 // mitochondrial inner membrane // inferred from electronic annotation /// 16020 /…	IPR001993 // Mitochondrial substrate carrier // 7.3E-35 /// IPR001993 // Mitochondrial substrate carrier // 5.7E-33 /// IPR001993 // Mitochondrial substrate carrier // 2.3E-27
5807	147006_at	-0.530176	2.10153	-8.6582	7.86774e-10	1.03622e-08	12.137	FBgn0033608	CG13220	CG13220	CG13220	36200	---	---	---	---
13436	154635_at	-0.610068	2.15865	-8.65543	7.92438e-10	1.04245e-08	12.1297	FBgn0030946	CG6659	CG6659	CG6659	32854	5515 // protein binding // inferred from physical interaction	---	---	---
7354	148553_at	-0.796267	1.29713	-8.64076	8.23148e-10	1.08082e-08	12.0914	FBgn0052072	CG32072	CG32072	CG32072	---	9922 // fatty acid elongase activity // inferred from direct assay /// 8415 // acyltransferase activity // inferred from electronic annotation	19368 // fatty acid elongation, unsaturated fatty acid // inferred from direct assay /// 42811 // pheromone biosynthesis // inferred from mutant phenotype /// 38 // very-long-chain fatty acid metabolism // inferred from sequence similarity /// 6633 // fatty acid biosynthesis // inferred from sequence similarity	16021 // integral to membrane // inferred from electronic annotation /// 5783 // endoplasmic reticulum // inferred from sequence similarity	IPR002076 // GNS1/SUR4 membrane protein // 1.2E-19 /// IPR002076 // GNS1/SUR4 membrane protein // 1.2E-19
9138	150337_at	-0.660111	1.27732	-8.63415	8.3737e-10	1.09846e-08	12.0741	FBgn0038916	CG6560	CG6560	CG6560	42580	3924 // GTPase activity // inferred from sequence or structural similarity /// 5525 // GTP binding // inferred from electronic annotation /// 166 // nucleotide binding // inferred from electronic annotation /// 3924 // GTPase activity // inferred from sequence similarity	6886 // intracellular protein transport // inferred from electronic annotation /// 7166 // cell surface receptor linked signal transduction // inferred from electronic annotation /// 7264 // small GTPase mediated signal transduction // inferred from electronic annotation /// 17157 // regulation of exocytosis // inferred from electronic annotation /// 6364 // rRNA processing // inferred from elect…	5622 // intracellular // inferred from electronic annotation	IPR006689 // ARF/SAR superfamily // 2.1E-101
5018	146217_at	-0.667118	1.11728	-8.63205	8.41957e-10	1.10344e-08	12.0685	FBgn0040096	CG16834	lectin-33A	lectin-33A	53516	5534 // galactose binding // inferred from sequence or structural similarity /// 5529 // sugar binding // inferred from electronic annotation /// 5534 // galactose binding // inferred from sequence similarity	---	---	IPR001304 // C-type lectin // 1.0E-4
6849	148048_at	-1.20119	0.413383	-8.62527	8.56893e-10	1.12197e-08	12.0508	FBgn0035343	CG16762	CG16762	CG16762	38310	---	---	---	IPR007931 // Protein of unknown function DUF725 // 1.8E-77
12175	153374_at	-0.913291	2.48064	-8.61805	8.731e-10	1.14212e-08	12.0319	FBgn0004646	CG3039	ogre	optic ganglion reduced	45382	5243 // gap-junction forming channel activity // inferred from electronic annotation /// 5515 // protein binding // inferred from physical interaction /// 15286 // innexin channel activity // inferred from expression pattern	7165 // signal transduction // inferred from electronic annotation /// 7399 // nervous system development // non-traceable author statement /// 7602 // phototransduction // inferred from mutant phenotype /// 7632 // visual behavior // inferred from sequence or structural similarity /// 7632 // visual behavior // inferred from sequence similarity	5921 // gap junction // non-traceable author statement /// 16021 // integral to membrane // non-traceable author statement /// 5921 // gap junction // inferred from expression pattern /// 5921 // gap junction // inferred from electronic annotation /// 16020 // membrane // inferred from electronic annotation /// 16021 // integral to membrane // inferred from electronic annotation	IPR000990 // Innexin // 1.0E-126
10534	151733_at	-0.688921	2.05729	-8.61432	8.81586e-10	1.15215e-08	12.0221	FBgn0010497	CG5304	l(2)01810	lethal (2) 01810	47253	5316 // high affinity inorganic phosphate:sodium symporter activity // inferred from sequence or structural similarity /// 5215 // transporter activity // inferred from electronic annotation /// 5316 // high affinity inorganic phosphate:sodium symporter activity // inferred from sequence similarity	5975 // carbohydrate metabolism // inferred from electronic annotation /// 6796 // phosphate metabolism // inferred from electronic annotation /// 6812 // cation transport // inferred from electronic annotation /// 6817 // phosphate transport // inferred from electronic annotation /// 6858 // extracellular transport // inferred from electronic annotation /// 6810 // transport // inferred from ele…	16021 // integral to membrane // inferred from electronic annotation /// 16020 // membrane // inferred from electronic annotation	---
11932	153131_at	-0.821441	1.47482	-8.60744	8.97471e-10	1.16963e-08	12.0041	FBgn0033241	CG2915	CG2915	CG2915	35754	4182 // carboxypeptidase A activity // inferred from sequence or structural similarity /// 4182 // carboxypeptidase A activity // inferred from electronic annotation /// 4182 // carboxypeptidase A activity // inferred from sequence similarity	6508 // proteolysis // inferred from electronic annotation	---	IPR000834 // Peptidase M14, carboxypeptidase A // 7.7E-73
12248	153447_at	-0.678332	1.98821	-8.60021	9.14497e-10	1.18851e-08	11.9851	FBgn0034455	CG11007	CG11007	CG11007	37249	16491 // oxidoreductase activity // inferred from electronic annotation	6118 // electron transport // inferred from electronic annotation	---	---
5302	146501_at	-0.801591	-0.231083	-8.59497	9.27027e-10	1.20256e-08	11.9714	FBgn0032804	CG13081	CG13081	CG13081	35245	---	---	---	---
[truncated: 2,450 more rows]
