# Supplementary material for: Gene expression changes in response to aging compared to heat stress, oxidative stress and ionizing radiation in Drosophila melanogaster
Source: Aging (Albany NY). 2012 Nov 30;4(11):768–89. doi: 10.18632/aging.100499 (PMC3560439; doi:10.18632/aging.100499)
Supplement: Supplementary file 13 [file aging-04-768-s013.xlsx]

## Sheet: TableS4i.HSup
Table S4i. HS up
Index	ID	M	A	t	P.Value	adj.P.Val	B	FlyBase	Ensembl	Gene.Symbol	Gene.Title	Entrez.Gene	Gene.Ontology.Molecular.Function	Gene.Ontology.Biological.Process	Gene.Ontology.Cellular.Component	InterPro
1997	143196_at	5.93158	0.902944	62.63	1.37e-34	1.92e-30	66.7837	FBgn0001229	CG4190	Hsp67Bc	Heat shock gene 67Bc	39071	---	6457 // protein folding // inferred from electronic annotation /// 6950 // response to stress // inferred from electronic annotation /// 6952 // defense response // inferred from electronic annotation /// 9408 // response to heat // inferred from sequence or structural similarity /// 9408 // response to heat // non-traceable author statement /// 9408 // response to heat // inferred from sequence …	---	IPR002068 // Heat shock protein Hsp20 // 1.5E-30
1	141200_at	3.8215	0.705029	47.1617	9.37e-31	6.56e-27	59.2917	FBgn0026582	CG9418	CG9418	CG9418	37407	3677 // DNA binding // inferred from sequence or structural similarity /// 30528 // transcription regulator activity // inferred from electronic annotation /// 5515 // protein binding // inferred from physical interaction /// 3677 // DNA binding // inferred from electronic annotation /// 3677 // DNA binding // inferred from sequence similarity	6355 // regulation of transcription, DNA-dependent // inferred from electronic annotation /// 6367 // transcription initiation from RNA polymerase II promoter // inferred from electronic annotation	---	IPR000910 // HMG1/2 (high mobility group) box // 5.2E-16
12384	153583_at	7.40231	1.92886	43.7264	9.76e-30	4.56e-26	57.1895	FBgn0001224	CG4463	Hsp23	Heat shock protein 23	39077	3779 // actin binding // inferred from sequence or structural similarity /// 5515 // protein binding // inferred from physical interaction /// 3779 // actin binding // inferred from sequence similarity	6457 // protein folding // inferred from electronic annotation /// 6952 // defense response // inferred from electronic annotation /// 9408 // response to heat // inferred from sequence or structural similarity /// 9408 // response to heat // non-traceable author statement /// 6986 // response to unfolded protein // inferred from electronic annotation /// 9408 // response to heat // inferred from…	---	IPR002068 // Heat shock protein Hsp20 // 5.6E-47
35	141234_at	2.54114	1.13689	39.7378	1.88e-28	5.47e-25	54.4838	FBgn0037185 /// FBgn0052454	CG11367	CG11367 /// CG32454	CG11367 /// CG32454	318037 /// 40491	8235 // metalloexopeptidase activity // inferred from electronic annotation /// 16787 // hydrolase activity // inferred from electronic annotation	6508 // proteolysis // inferred from electronic annotation	---	---
1223	142422_at	3.4034	0.0706727	39.6864	1.95e-28	5.47e-25	54.4469	FBgn0032399	CG6785	CG6785	CG6785	34620	---	---	---	---
1864	143063_at	3.4718	1.23242	37.0203	1.67e-27	3.89e-24	52.4519	---	CG3481 /// CG3484	---	---	---	4022 // alcohol dehydrogenase activity // inferred from direct assay /// 4022 // alcohol dehydrogenase activity // non-traceable author statement /// 4022 // alcohol dehydrogenase activity // traceable author statement /// 16491 // oxidoreductase activity // non-traceable author statement /// 51287 // NAD binding // traceable author statement /// 4022 // alcohol dehydrogenase activity // inferred…	6069 // ethanol oxidation // non-traceable author statement /// 48149 // behavioral response to ethanol // inferred from mutant phenotype /// 8152 // metabolism // inferred from electronic annotation /// 46164 // alcohol catabolism // inferred from mutant phenotype /// 6066 // alcohol metabolism // inferred from electronic annotation /// 6614 // SRP-dependent cotranslational protein targeting to …	5786 // signal recognition particle (sensu Eukaryota) // inferred from electronic annotation	---
1637	142836_at	6.30627	3.51267	35.9226	4.2e-27	8.41e-24	51.5824	FBgn0068141	CG4460 /// CG4456	DyakHsp67Bb	Hsp67Bb	---	---	8340 // determination of adult life span // inferred from mutant phenotype /// 9408 // response to heat // inferred from sequence or structural similarity /// 9408 // response to heat // non-traceable author statement /// 42026 // protein refolding // non-traceable author statement /// 6457 // protein folding // inferred from electronic annotation /// 6986 // response to unfolded protein // infer…	---	---
2614	143813_at	2.79599	0.871757	34.7203	1.19e-26	2.09e-23	50.5952	FBgn0015522	CG14489	olf186-M	olf186-M	37039	---	---	---	---
9837	151036_f_at	9.29573	0.423338	34.434	1.54e-26	2.4e-23	50.3546	FBgn0051354 /// FBgn0013277 /// FBgn0013276 /// FBgn0013278 /// FBgn0013279	CG18743 /// CG31449 /// CG5834 /// CG31359 /// CG6489	Hsp70Bbb /// Hsp70Ba /// Hsp70Ab /// Hsp70Bb /// Hsp70Bc	Hsp70Bbb /// Heat-shock-protein-70Ba /// Heat-shock-protein-70Ab /// Heat-shock-protein-70Bb /// Heat-shock-protein-70Bc	44920 /// 44921 /// 48582 /// 48583 /// 50022	5524 // ATP binding // inferred from electronic annotation /// 166 // nucleotide binding // inferred from electronic annotation	6457 // protein folding // inferred from electronic annotation /// 6461 // protein complex assembly // inferred from electronic annotation /// 6952 // defense response // inferred from electronic annotation /// 9408 // response to heat // inferred from sequence or structural similarity /// 9408 // response to heat // non-traceable author statement /// 6986 // response to unfolded protein // infer…	---	IPR001023 // Heat shock protein Hsp70 // 1.0E-126
9375	150574_at	4.03803	1.98155	32.7487	7.16e-26	1e-22	48.8917	---	CG11889 /// CG11891	---	---	---	16301 // kinase activity // inferred from electronic annotation /// 16740 // transferase activity // inferred from electronic annotation	---	---	---
12108	153307_at	5.99406	2.16043	32.3255	1.07e-25	1.36e-22	48.5115	FBgn0001226	CG4466	Hsp27	Heat shock protein 27	39078	5515 // protein binding // inferred from physical interaction	6457 // protein folding // inferred from electronic annotation /// 6952 // defense response // inferred from electronic annotation /// 8340 // determination of adult life span // inferred from mutant phenotype /// 9408 // response to heat // inferred from sequence or structural similarity /// 9408 // response to heat // non-traceable author statement /// 42026 // protein refolding // non-traceabl…	---	IPR002068 // Heat shock protein Hsp20 // 1.6E-43
9353	150552_at	2.58304	1.34268	32.1456	1.26e-25	1.48e-22	48.3483	FBgn0039273	CG9996	CG9996	CG9996	43008	16758 // transferase activity, transferring hexosyl groups // inferred from electronic annotation	16051 // carbohydrate biosynthesis // inferred from electronic annotation	---	IPR002495 // Glycosyl transferase, family 8 // 1.1E-7 /// IPR002495 // Glycosyl transferase, family 8 // 1.1E-7
8583	149782_at	7.75742	1.72579	31.2931	2.87e-25	3.09e-22	47.5609	FBgn0013279 /// FBgn0013278 /// FBgn0013277 /// FBgn0051354	CG31449 /// CG5834 /// CG31359 /// CG6489	Hsp70Bc /// Hsp70Bb /// Hsp70Ba /// Hsp70Bbb	Heat-shock-protein-70Bc /// Heat-shock-protein-70Bb /// Heat-shock-protein-70Ba /// Hsp70Bbb	44921 /// 48582 /// 48583 /// 50022	5524 // ATP binding // inferred from electronic annotation /// 166 // nucleotide binding // inferred from electronic annotation	6457 // protein folding // inferred from electronic annotation /// 6461 // protein complex assembly // inferred from electronic annotation /// 6952 // defense response // inferred from electronic annotation /// 9408 // response to heat // non-traceable author statement /// 9408 // response to heat // inferred from sequence or structural similarity /// 6986 // response to unfolded protein // infer…	---	IPR001023 // Heat shock protein Hsp70 // 1.0E-126
8023	149222_at	4.29076	1.19755	30.118	9.21e-25	9.22e-22	46.4373	FBgn0037151	CG7130	CG7130	CG7130	40450	42623 // ATPase activity, coupled // inferred from electronic annotation /// 51082 // unfolded protein binding // inferred from electronic annotation	6457 // protein folding // inferred from electronic annotation /// 6950 // response to stress // inferred from electronic annotation /// 6952 // defense response // inferred from electronic annotation /// 9408 // response to heat // inferred from sequence or structural similarity /// 9408 // response to heat // inferred from sequence similarity	---	IPR001623 // Heat shock protein DnaJ, N-terminal // 9.4E-33
8524	149723_at	2.96661	1.25927	29.8161	1.25e-24	1.17e-21	46.1411	FBgn0037974	CG12224	CG12224	CG12224	41453	16491 // oxidoreductase activity // inferred from sequence or structural similarity /// 16491 // oxidoreductase activity // inferred from sequence similarity	---	---	IPR001395 // Aldo/keto reductase // 2.9E-12
12532	153731_at	5.94759	2.44948	29.3365	2.05e-24	1.79e-21	45.6641	FBgn0001225	CG4183	Hsp26	Heat shock protein 26	39075	---	6457 // protein folding // inferred from electronic annotation /// 6952 // defense response // inferred from electronic annotation /// 8340 // determination of adult life span // inferred from mutant phenotype /// 9408 // response to heat // inferred from sequence or structural similarity /// 9408 // response to heat // non-traceable author statement /// 6986 // response to unfolded protein // in…	---	IPR002068 // Heat shock protein Hsp20 // 6.6E-47
1998	143197_at	6.79555	2.04211	28.9437	3.08e-24	2.54e-21	45.2673	FBgn0001230	CG5436	Hsp68	Heat shock protein 68	42852	5524 // ATP binding // inferred from electronic annotation /// 51082 // unfolded protein binding // inferred from sequence or structural similarity /// 166 // nucleotide binding // inferred from electronic annotation /// 51082 // unfolded protein binding // inferred from sequence similarity	6457 // protein folding // inferred from electronic annotation /// 6457 // protein folding // inferred from sequence or structural similarity /// 6461 // protein complex assembly // inferred from electronic annotation /// 6952 // defense response // inferred from electronic annotation /// 8340 // determination of adult life span // inferred from mutant phenotype /// 9408 // response to heat // in…	5739 // mitochondrion // inferred from sequence or structural similarity /// 5739 // mitochondrion // inferred from sequence similarity	IPR001023 // Heat shock protein Hsp70 // 1.0E-126
453	141652_at	4.07942	1.16612	28.0827	7.71e-24	6e-21	44.3777	FBgn0036772	CG5290	CG5290	CG5290	39998	---	---	---	---
6906	148105_at	1.31037	-0.0885704	27.8491	9.92e-24	7.32e-21	44.1313	FBgn0035439	CG14961	CG14961	CG14961	38414	---	---	---	---
11608	152807_at	1.58049	0.388765	27.5689	1.35e-23	9.44e-21	43.8332	FBgn0033778	CG3790	CG3790	CG3790	36417	4867 // serine-type endopeptidase inhibitor activity // inferred from electronic annotation /// 8324 // cation transporter activity // inferred from electronic annotation /// 15226 // carnitine transporter activity // inferred from sequence or structural similarity /// 5215 // transporter activity // inferred from electronic annotation /// 15226 // carnitine transporter activity // inferred from …	6812 // cation transport // inferred from electronic annotation /// 6858 // extracellular transport // inferred from electronic annotation /// 6810 // transport // inferred from electronic annotation	16021 // integral to membrane // inferred from electronic annotation /// 16020 // membrane // inferred from electronic annotation	IPR005828 // General substrate transporter // 3.2E-12
2636	143835_at	5.20936	2.62832	27.1698	2.09e-23	1.4e-20	43.4031	FBgn0015657	CG10578	DnaJ-1	DnaJ-like-1	38643	51082 // unfolded protein binding // inferred from electronic annotation /// 5515 // protein binding // inferred from physical interaction /// 31072 // heat shock protein binding // inferred from electronic annotation	6457 // protein folding // inferred from electronic annotation /// 6950 // response to stress // inferred from electronic annotation /// 6952 // defense response // inferred from electronic annotation /// 9408 // response to heat // inferred from sequence or structural similarity /// 6986 // response to unfolded protein // inferred from electronic annotation /// 9408 // response to heat // inferr…	5737 // cytoplasm // non-traceable author statement	IPR002939 // Chaperone DnaJ, C-terminal // 2.2E-9 /// IPR001623 // Heat shock protein DnaJ, N-terminal // 9.7E-39 /// IPR002939 // Chaperone DnaJ, C-terminal // 1.7E-6
4647	145846_at	5.91309	0.00154663	26.6472	3.76e-23	2.4e-20	42.8301	FBgn0031736	CG11030	CG11030	CG11030	33805	---	---	---	---
6350	147549_at	1.63549	0.0627366	26.0708	7.27e-23	4.43e-20	42.1846	FBgn0034514	CG13427	CG13427	CG13427	37316	---	---	---	---
2046	143245_at	3.94163	2.18565	25.9031	8.83e-23	4.71e-20	41.9942	FBgn0002578 /// FBgn0082722 /// FBgn0082695	CG8342	m1 /// Dsimm1 /// Dyakm1	E(spl) region transcript m1 /// m1 /// m1	43154	4867 // serine-type endopeptidase inhibitor activity // inferred from sequence or structural similarity /// 4866 // endopeptidase inhibitor activity // inferred from electronic annotation /// 4867 // serine-type endopeptidase inhibitor activity // inferred from electronic annotation /// 4867 // serine-type endopeptidase inhibitor activity // inferred from sequence similarity	7275 // development // inferred from electronic annotation /// 7399 // nervous system development // inferred from electronic annotation /// 30154 // cell differentiation // inferred from electronic annotation	---	IPR002350 // Serine protease inhibitor, Kazal type // 6.9E-7
3862	145061_at	2.63089	0.104859	25.8796	9.07e-23	4.71e-20	41.9675	FBgn0052602	CG32602	CG32602	CG32602	32384	4872 // receptor activity // inferred from electronic annotation	6952 // defense response // inferred from electronic annotation /// 7155 // cell adhesion // inferred from electronic annotation	---	---
6201	147400_at	1.55752	-0.433357	25.9172	8.69e-23	4.71e-20	42.0102	FBgn0034281	CG14490	CG14490	CG14490	37041	---	---	---	IPR003409 // MORN motif // 2.4E-4 /// IPR003409 // MORN motif // 1.1E-4 /// IPR003409 // MORN motif // 6.3E-8 /// IPR003409 // MORN motif // 4.3E-6 /// IPR003409 // MORN motif // 2.1E-5 /// IPR003409 // MORN motif // 6.3E-4
2491	143690_at	1.90759	0.878146	25.6172	1.23e-22	6.17e-20	41.6666	FBgn0011769	CG4205	Fdxh	Ferredoxin	39070	9055 // electron carrier activity // inferred from sequence or structural similarity /// 9055 // electron carrier activity // non-traceable author statement /// 16491 // oxidoreductase activity // inferred from electronic annotation /// 5506 // iron ion binding // inferred from electronic annotation /// 46872 // metal ion binding // inferred from electronic annotation /// 51536 // iron-sulfur clu…	6124 // ferredoxin metabolism // inferred from electronic annotation /// 6118 // electron transport // inferred from electronic annotation /// 6810 // transport // inferred from electronic annotation	5739 // mitochondrion // inferred from electronic annotation	IPR001041 // Ferredoxin // 5.6E-8
12852	154051_at	2.43049	1.59513	25.1424	2.16e-22	1.04e-19	41.1144	FBgn0024909	CG2670	Taf7	TBP-associated factor 7	40934	3700 // transcription factor activity // non-traceable author statement /// 16251 // general RNA polymerase II transcription factor activity // inferred from sequence or structural similarity /// 5515 // protein binding // inferred from physical interaction /// 3700 // transcription factor activity // inferred from electronic annotation /// 16251 // general RNA polymerase II transcription factor …	6355 // regulation of transcription, DNA-dependent // non-traceable author statement /// 6357 // regulation of transcription from RNA polymerase II promoter // inferred from electronic annotation /// 6367 // transcription initiation from RNA polymerase II promoter // inferred from sequence or structural similarity /// 45449 // regulation of transcription // inferred from electronic annotation ///…	5634 // nucleus // non-traceable author statement /// 5669 // transcription factor TFIID complex // inferred from sequence or structural similarity /// 5634 // nucleus // inferred from electronic annotation /// 5669 // transcription factor TFIID complex // inferred from sequence similarity	IPR006751 // TAFII55 protein conserved region // 5.4E-99
590	141789_at	2.82494	1.59369	24.922	2.82e-22	1.31e-19	40.8547	FBgn0010812	CG2708	Tom34	Translocase of outer membrane 34	44910	3910 // DNA ligase (ATP) activity // inferred from electronic annotation /// 5386 // carrier activity // inferred from electronic annotation /// 5524 // ATP binding // inferred from electronic annotation /// 5488 // binding // inferred from electronic annotation	6260 // DNA replication // inferred from electronic annotation /// 6281 // DNA repair // inferred from electronic annotation /// 6310 // DNA recombination // inferred from electronic annotation	5742 // mitochondrial outer membrane translocase complex // inferred from sequence or structural similarity /// 5742 // mitochondrial outer membrane translocase complex // inferred from sequence similarity	IPR001440 // TPR repeat // 1.3E-4 /// IPR001440 // TPR repeat // 2.9E-9 /// IPR001440 // TPR repeat // 1.4E-4
5570	146769_at	3.21894	1.14674	24.7997	3.26e-22	1.47e-19	40.7095	FBgn0033224	CG1553	CG1553	CG1553	35730	---	---	---	---
1518	142717_at	2.86552	0.958443	24.3824	5.42e-22	2.37e-19	40.2088	FBgn0003741	CG16724	tra	transformer	39849	---	245 // spliceosome assembly // non-traceable author statement /// 398 // nuclear mRNA splicing, via spliceosome // non-traceable author statement /// 398 // nuclear mRNA splicing, via spliceosome // traceable author statement /// 7530 // sex determination // non-traceable author statement /// 7530 // sex determination // traceable author statement /// 7541 // sex determination, primary response t…	5681 // spliceosome complex // non-traceable author statement	---
4704	145903_at	5.20182	-0.657064	23.3376	2e-21	8.51e-19	38.9176	FBgn0051638	CG31638	CG31638	CG31638	33910	---	---	16459 // myosin // inferred from sequence or structural similarity /// 16459 // myosin // inferred from sequence similarity	---
6245	147444_at	1.95996	1.23996	23.2456	2.25e-21	9.29e-19	38.8012	FBgn0034356	CG10924	CG10924	CG10924	37130	4613 // phosphoenolpyruvate carboxykinase (GTP) activity // inferred from sequence or structural similarity /// 5215 // transporter activity // inferred from electronic annotation /// 5525 // GTP binding // inferred from electronic annotation /// 5515 // protein binding // inferred from physical interaction /// 4611 // phosphoenolpyruvate carboxykinase activity // inferred from electronic annotat…	6094 // gluconeogenesis // inferred from sequence or structural similarity /// 6810 // transport // inferred from electronic annotation /// 6094 // gluconeogenesis // inferred from electronic annotation /// 6094 // gluconeogenesis // inferred from sequence similarity	5739 // mitochondrion // inferred from sequence or structural similarity /// 5739 // mitochondrion // inferred from sequence similarity	IPR008209 // Phosphoenolpyruvate carboxykinase (GTP) // 1.0E-126
5794	146993_at	1.56279	0.487147	22.8312	3.85e-21	1.54e-18	38.2715	FBgn0050029	CG30029	CG30029	CG30029	246402	---	---	---	---
5925	147124_at	1.95321	0.942115	22.5377	5.65e-21	2.19e-18	37.8906	FBgn0033786	CG3884	CG3884	CG3884	36429	5515 // protein binding // inferred from physical interaction	---	---	---
13462	154661_at	1.80982	2.91506	22.5217	5.77e-21	2.19e-18	37.8697	FBgn0004797	CG31991	mdy	midway	44887	3676 // nucleic acid binding // inferred from electronic annotation /// 4144 // diacylglycerol O-acyltransferase activity // inferred from direct assay /// 4144 // diacylglycerol O-acyltransferase activity // inferred from sequence or structural similarity /// 4144 // diacylglycerol O-acyltransferase activity // non-traceable author statement /// 4772 // sterol O-acyltransferase activity // infer…	6418 // tRNA aminoacylation for protein translation // inferred from electronic annotation /// 6422 // aspartyl-tRNA aminoacylation // inferred from electronic annotation /// 6430 // lysyl-tRNA aminoacylation // inferred from electronic annotation /// 8203 // cholesterol metabolism // inferred from electronic annotation /// 9993 // oogenesis (sensu Insecta) // inferred from mutant phenotype /// 1…	5737 // cytoplasm // inferred from electronic annotation	IPR004299 // Membrane bound O-acyl transferase, MBOAT // 9.4E-28 /// IPR004299 // Membrane bound O-acyl transferase, MBOAT // 9.4E-28
10635	151834_at	4.19821	3.33199	22.1991	8.86e-21	3.26e-18	37.4455	FBgn0052130	CG32130	CG32130	CG32130	39518	4263 // chymotrypsin activity // inferred from electronic annotation /// 4295 // trypsin activity // inferred from electronic annotation /// 5515 // protein binding // inferred from electronic annotation /// 5515 // protein binding // inferred from physical interaction /// 4252 // serine-type endopeptidase activity // inferred from electronic annotation /// 8233 // peptidase activity // inferred …	6508 // proteolysis // inferred from electronic annotation /// 6915 // apoptosis // inferred from electronic annotation	---	IPR003103 // Apoptosis regulator Bcl-2 protein, BAG // 1.4E-17 /// IPR003103 // Apoptosis regulator Bcl-2 protein, BAG // 1.4E-17 /// IPR003103 // Apoptosis regulator Bcl-2 protein, BAG // 1.4E-17
4514	145713_at	2.7702	0.947238	22.0801	1.04e-20	3.64e-18	37.2875	FBgn0031535	CG12795	CG12795	CG12795	33561	---	---	---	IPR000058 // Zn-finger, AN1-like // 5.8E-5
6928	148127_at	1.30293	0.656071	22.0891	1.03e-20	3.64e-18	37.2994	FBgn0035468	CG14979	Gr63a	Gustatory receptor 63a	38453	8527 // taste receptor activity // non-traceable author statement	50909 // sensory perception of taste // non-traceable author statement	16021 // integral to membrane // non-traceable author statement	---
7211	148410_at	2.54742	3.11256	21.9999	1.16e-20	3.95e-18	37.1805	FBgn0035904	CG6776	CG6776	CG6776	38972	4364 // glutathione transferase activity // inferred from sequence or structural similarity /// 5515 // protein binding // inferred from physical interaction /// 4364 // glutathione transferase activity // inferred from electronic annotation /// 16740 // transferase activity // inferred from electronic annotation /// 4364 // glutathione transferase activity // inferred from sequence similarity	6800 // oxygen and reactive oxygen species metabolism // inferred from electronic annotation /// 6952 // defense response // inferred from electronic annotation /// 9636 // response to toxin // inferred from electronic annotation /// 8152 // metabolism // inferred from electronic annotation	5737 // cytoplasm // inferred from electronic annotation	IPR004046 // Glutathione S-transferase, C-terminal // 6.0E-6 /// IPR004045 // Glutathione S-transferase, N-terminal // 5.7E-11
2818	144017_at	2.51961	3.11565	21.9346	1.26e-20	4.11e-18	37.0932	FBgn0024352	CG2720	Hop	Hsp70/Hsp90 organizing protein homolog	33202	51082 // unfolded protein binding // inferred from sequence or structural similarity /// 5488 // binding // inferred from electronic annotation /// 51082 // unfolded protein binding // inferred from sequence similarity	6457 // protein folding // inferred from electronic annotation /// 6457 // protein folding // inferred from sequence or structural similarity /// 6461 // protein complex assembly // inferred from electronic annotation /// 6950 // response to stress // inferred from electronic annotation /// 6952 // defense response // inferred from electronic annotation /// 6457 // protein folding // inferred fro…	---	IPR001440 // TPR repeat // 7.4E-6 /// IPR001440 // TPR repeat // 1.6E-4 /// IPR001440 // TPR repeat // 1.3E-6 /// IPR001440 // TPR repeat // 1.4E-7 /// IPR001440 // TPR repeat // 1.4E-4 /// IPR001440 // TPR repeat // 4.5E-7 /// IPR001440 // TPR repeat // 4.6E-8 /// IPR001440 // TPR repeat // 9.6E-6 /// IPR001440 // TPR repeat // 1.4E-8
4817	146016_at	2.51639	3.05477	21.9483	1.24e-20	4.11e-18	37.1115	FBgn0028987	CG8137	Spn2	Serine protease inhibitor 2	49807	4867 // serine-type endopeptidase inhibitor activity // inferred from sequence or structural similarity /// 4867 // serine-type endopeptidase inhibitor activity // non-traceable author statement /// 42562 // hormone binding // inferred from sequence or structural similarity /// 4867 // serine-type endopeptidase inhibitor activity // inferred from electronic annotation /// 8233 // peptidase activi…	6508 // proteolysis // inferred from electronic annotation /// 45861 // negative regulation of proteolysis // inferred from sequence or structural similarity /// 45861 // negative regulation of proteolysis // inferred from sequence similarity	---	IPR000215 // Serpin // 1.2E-112
7623	148822_at	1.74876	0.876956	21.5398	2.16e-20	6.88e-18	36.5597	FBgn0041160	CG7554	comm2	comm2	39716	---	---	---	---
1174	142373_at	2.24408	0.457681	21.4267	2.52e-20	7.68e-18	36.4053	FBgn0038348	CG18519	CG18519	CG18519	41895	16491 // oxidoreductase activity // inferred from electronic annotation	6118 // electron transport // inferred from electronic annotation /// 6139 // nucleobase, nucleoside, nucleotide and nucleic acid metabolism // inferred from electronic annotation /// 6144 // purine base metabolism // inferred from electronic annotation /// 6800 // oxygen and reactive oxygen species metabolism // inferred from electronic annotation /// 6952 // defense response // inferred from el…	---	IPR008274 // Aldehyde oxidase and xanthine dehydrogenase, molybdopterin binding // 9.7E-19 /// IPR008274 // Aldehyde oxidase and xanthine dehydrogenase, molybdopterin binding // 1.1E-4 /// IPR008274 // Aldehyde oxidase and xanthine dehydrogenase, molybdopterin binding // 1.7E-76 /// IPR002346 // Molybdopterin dehydrogenase, FAD-binding // 2.5E-7 /// IPR000674 // Aldehyde oxidase and xanthine dehy…
1999	143198_at	3.77474	4.46284	21.4289	2.52e-20	7.68e-18	36.4082	FBgn0001233	CG1242	Hsp83	Heat shock protein 83	38389	5524 // ATP binding // inferred from electronic annotation /// 42623 // ATPase activity, coupled // inferred from sequence or structural similarity /// 51082 // unfolded protein binding // inferred from electronic annotation /// 5515 // protein binding // inferred from physical interaction /// 166 // nucleotide binding // inferred from electronic annotation /// 42623 // ATPase activity, coupled /…	6457 // protein folding // inferred from sequence or structural similarity /// 6457 // protein folding // traceable author statement /// 6461 // protein complex assembly // inferred from electronic annotation /// 6952 // defense response // inferred from electronic annotation /// 7015 // actin filament organization // inferred from mutant phenotype /// 7098 // centrosome cycle // inferred from mu…	5737 // cytoplasm // inferred from sequence or structural similarity /// 5737 // cytoplasm // non-traceable author statement /// 5813 // centrosome // inferred from direct assay /// 5813 // centrosome // inferred from sequence or structural similarity /// 5737 // cytoplasm // inferred from sequence similarity	IPR001404 // Heat shock protein Hsp90 // 1.0E-126 /// IPR003594 // ATP-binding region, ATPase-like // 6.0E-18
4201	145400_f_at	2.32944	1.50183	21.3742	2.71e-20	8.08e-18	36.3333	FBgn0026175	CG11941	skpC	skpC	32996	3676 // nucleic acid binding // inferred from electronic annotation /// 19237 // centromeric DNA binding // inferred from electronic annotation	6508 // proteolysis // inferred from electronic annotation /// 7049 // cell cycle // inferred from electronic annotation /// 7059 // chromosome segregation // inferred from electronic annotation /// 7067 // mitosis // inferred from electronic annotation /// 19538 // protein metabolism // inferred from electronic annotation	---	IPR001232 // SKP1 component // 3.4E-36 /// IPR001232 // SKP1 component // 3.9E-21
7827	149026_at	1.58747	0.141288	21.0941	4e-20	1.14e-17	35.9465	FBgn0036836	CG11619	CG11619	CG11619	40072	---	---	---	IPR004129 // Glycerophosphoryl diester phosphodiesterase // 1.3E-42
8548	149747_at	1.31367	0.286435	20.9642	4.8e-20	1.32e-17	35.7655	FBgn0038009	CG17738	CG17738	CG17738	41490	5515 // protein binding // inferred from physical interaction	---	---	---
1996	143195_at	1.37171	0.24515	20.8053	6e-20	1.62e-17	35.5427	FBgn0001227	CG4167	Hsp67Ba	Heat shock gene 67Ba	39076	---	6457 // protein folding // inferred from electronic annotation /// 6950 // response to stress // inferred from electronic annotation /// 6952 // defense response // inferred from electronic annotation /// 9408 // response to heat // inferred from sequence or structural similarity /// 9408 // response to heat // non-traceable author statement /// 9408 // response to heat // inferred from sequence …	---	IPR002068 // Heat shock protein Hsp20 // 1.1E-38
2748	143947_at	2.82888	-0.825234	20.6935	7.03e-20	1.86e-17	35.3849	FBgn0021742	CG1567	C901	C901	32032	5102 // receptor binding // inferred from electronic annotation	7154 // cell communication // inferred from electronic annotation /// 7165 // signal transduction // inferred from electronic annotation /// 7267 // cell-cell signaling // inferred from electronic annotation /// 7275 // development // inferred from electronic annotation /// 7398 // ectoderm development // inferred from electronic annotation /// 7399 // nervous system development // inferred from …	16020 // membrane // inferred from electronic annotation	IPR006209 // EGF-like domain // 5.4E-4 /// IPR006209 // EGF-like domain // 3.1E-5 /// IPR006209 // EGF-like domain // 6.9E-7 /// IPR001774 // Delta/Serrate/lag-2 (DSL) protein // 2.1E-7
8555	149754_at	1.55232	0.604101	20.6072	7.95e-20	2.06e-17	35.2626	FBgn0042206	CG18548	GstD10	Glutathione S transferase D10	59240	4364 // glutathione transferase activity // inferred from direct assay /// 4364 // glutathione transferase activity // inferred from sequence or structural similarity /// 16740 // transferase activity // inferred from electronic annotation /// 4364 // glutathione transferase activity // inferred from sequence similarity	6952 // defense response // inferred from electronic annotation /// 9636 // response to toxin // inferred from electronic annotation	---	IPR004046 // Glutathione S-transferase, C-terminal // 2.1E-8 /// IPR004045 // Glutathione S-transferase, N-terminal // 1.0E-16
10857	152056_at	2.43882	4.60611	20.5282	8.89e-20	2.27e-17	35.1502	FBgn0003231	CG10360	ref(2)P	refractory to sigma P	35246	4197 // cysteine-type endopeptidase activity // inferred from electronic annotation /// 8270 // zinc ion binding // inferred from electronic annotation /// 30528 // transcription regulator activity // inferred from electronic annotation /// 5515 // protein binding // inferred from physical interaction /// 3677 // DNA binding // inferred from electronic annotation /// 46872 // metal ion binding //…	6508 // proteolysis // inferred from electronic annotation /// 19058 // viral infectious cycle // non-traceable author statement	5634 // nucleus // non-traceable author statement /// 5634 // nucleus // inferred from electronic annotation	IPR000433 // Zn-finger, ZZ type // 8.7E-25 /// IPR000270 // Octicosapeptide/Phox/Bem1p // 4.3E-8
12985	154184_at	2.29837	4.01528	20.2813	1.27e-19	3.12e-17	34.7965	FBgn0023129	CG3705	aay	astray	39085	4647 // phosphoserine phosphatase activity // inferred from sequence or structural similarity /// 4647 // phosphoserine phosphatase activity // non-traceable author statement /// 287 // magnesium ion binding // inferred from electronic annotation /// 3824 // catalytic activity // inferred from electronic annotation /// 4647 // phosphoserine phosphatase activity // inferred from electronic annotat…	6563 // L-serine metabolism // inferred from sequence or structural similarity /// 6564 // L-serine biosynthesis // non-traceable author statement /// 7411 // axon guidance // inferred from mutant phenotype /// 7422 // peripheral nervous system development // traceable author statement /// 6564 // L-serine biosynthesis // inferred from electronic annotation /// 8152 // metabolism // inferred from…	---	IPR005834 // Haloacid dehalogenase-like hydrolase // 5.7E-9
13418	154617_at	1.4167	1.13203	20.2414	1.34e-19	3.24e-17	34.739	FBgn0036104	CG6418	CG6418	CG6418	39218	3676 // nucleic acid binding // inferred from electronic annotation /// 4004 // ATP-dependent RNA helicase activity // inferred from sequence or structural similarity /// 4386 // helicase activity // inferred from sequence or structural similarity /// 5524 // ATP binding // inferred from electronic annotation /// 5515 // protein binding // inferred from physical interaction /// 166 // nucleotide …	6139 // nucleobase, nucleoside, nucleotide and nucleic acid metabolism // inferred from electronic annotation	---	IPR001650 // Helicase, C-terminal // 4.5E-34 /// IPR001410 // DEAD/DEAH box helicase // 1.2E-87
11096	152295_at	1.7407	0.704522	20.1805	1.47e-19	3.48e-17	34.6509	FBgn0027553	CG32721	CG32721	CG32721	31681	3729 // mRNA binding // inferred from sequence or structural similarity /// 3723 // RNA binding // inferred from sequence or structural similarity /// 3729 // mRNA binding // inferred from sequence similarity	7070 // negative regulation of transcription from RNA polymerase II promoter, mitotic // inferred from sequence or structural similarity /// 6350 // transcription // inferred from electronic annotation /// 6355 // regulation of transcription, DNA-dependent // inferred from electronic annotation /// 16481 // negative regulation of transcription // inferred from electronic annotation /// 7070 // ne…	17053 // transcriptional repressor complex // inferred from sequence or structural similarity /// 5634 // nucleus // inferred from electronic annotation /// 17053 // transcriptional repressor complex // inferred from sequence similarity	IPR010405 // Cofactor of BRCA1 // 1.0E-126
6252	147451_at	1.97844	1.4021	20.0955	1.66e-19	3.81e-17	34.5277	FBgn0034366	CG5489	Atg7	Autophagy-specific gene 7	37141	3824 // catalytic activity // inferred from electronic annotation /// 5386 // carrier activity // inferred from electronic annotation /// 5488 // binding // inferred from electronic annotation	6508 // proteolysis // inferred from electronic annotation /// 6914 // autophagy // inferred from mutant phenotype /// 7165 // signal transduction // inferred from electronic annotation /// 7242 // intracellular signaling cascade // inferred from electronic annotation /// 19538 // protein metabolism // inferred from electronic annotation	---	IPR000594 // UBA/THIF-type NAD/FAD binding fold // 5.9E-15 /// IPR000594 // UBA/THIF-type NAD/FAD binding fold // 5.9E-15
5723	146922_at	1.64765	1.16269	19.8029	2.55e-19	5.56e-17	34.0997	FBgn0010531	CG17753	CCS	CCS	46035	4785 // copper, zinc superoxide dismutase activity // inferred from electronic annotation /// 5507 // copper ion binding // inferred from electronic annotation /// 16491 // oxidoreductase activity // inferred from electronic annotation /// 16532 // superoxide dismutase copper chaperone activity // inferred from sequence or structural similarity /// 16532 // superoxide dismutase copper chaperone a…	6801 // superoxide metabolism // inferred from electronic annotation /// 6952 // defense response // inferred from electronic annotation /// 15680 // intracellular copper ion transport // inferred from sequence or structural similarity /// 15680 // intracellular copper ion transport // non-traceable author statement /// 6825 // copper ion transport // inferred from electronic annotation /// 30001…	---	IPR006121 // Heavy metal transport/detoxification protein // 1.9E-12 /// IPR001424 // Copper/Zinc superoxide dismutase // 2.7E-50
11702	152901_at	2.6161	3.6743	19.7945	2.58e-19	5.56e-17	34.0874	FBgn0032699	CG10383	CG10383	CG10383	35123	5488 // binding // inferred from electronic annotation	---	---	---
408	141607_at	1.39484	1.05623	19.2132	6.14e-19	1.27e-16	33.2195	FBgn0024988	CG14801	CG14801	CG14801	31136	3676 // nucleic acid binding // inferred from electronic annotation /// 4527 // exonuclease activity // inferred from sequence or structural similarity /// 4532 // exoribonuclease activity // inferred from electronic annotation /// 4518 // nuclease activity // inferred from electronic annotation /// 4527 // exonuclease activity // inferred from electronic annotation /// 16787 // hydrolase activit…	6139 // nucleobase, nucleoside, nucleotide and nucleic acid metabolism // inferred from electronic annotation	5622 // intracellular // inferred from electronic annotation /// 5634 // nucleus // inferred from electronic annotation	IPR006055 // Exonuclease // 1.3E-36 /// IPR006055 // Exonuclease // 1.3E-36 /// IPR006055 // Exonuclease // 1.3E-36
2628	143827_at	2.17063	2.10335	19.196	6.31e-19	1.28e-16	33.1935	FBgn0015586	CG3801	Acp76A	Accessory gland-specific peptide 76A	40078	4867 // serine-type endopeptidase inhibitor activity // inferred from sequence or structural similarity /// 42562 // hormone binding // inferred from sequence or structural similarity /// 4867 // serine-type endopeptidase inhibitor activity // inferred from electronic annotation /// 4867 // serine-type endopeptidase inhibitor activity // inferred from sequence similarity /// 42562 // hormone bind…	45861 // negative regulation of proteolysis // inferred from sequence or structural similarity /// 45861 // negative regulation of proteolysis // inferred from sequence similarity	---	---
10940	152139_at	3.00688	0.291043	19.0227	8.21e-19	1.64e-16	32.9301	FBgn0035880	CG17352	CG17352	CG17352	38946	---	---	---	IPR002172 // Low density lipoprotein-receptor, class A // 3.4E-9
10990	152189_at	1.9379	1.79338	18.8093	1.14e-18	2.21e-16	32.6027	FBgn0038475	CG3962	Keap1	Keap1	42062	3779 // actin binding // inferred from sequence or structural similarity /// 5200 // structural constituent of cytoskeleton // inferred from electronic annotation /// 5515 // protein binding // inferred from electronic annotation /// 3779 // actin binding // inferred from sequence similarity	---	---	IPR006652 // Kelch repeat // 2.1E-4 /// IPR006652 // Kelch repeat // 9.6E-13 /// IPR006652 // Kelch repeat // 3.1E-15 /// IPR006652 // Kelch repeat // 1.4E-17 /// IPR006652 // Kelch repeat // 1.2E-16 /// IPR006652 // Kelch repeat // 7.1E-16 /// IPR000210 // BTB/POZ domain // 4.3E-36 /// IPR006652 // Kelch repeat // 2.1E-4 /// IPR006652 // Kelch repeat // 9.6E-13 /// IPR006652 // Kelch repeat // 3…
12694	153893_at	3.78129	1.25525	18.2246	2.83e-18	5.29e-16	31.6885	FBgn0000147	CG3068	aur	aurora	41446	4672 // protein kinase activity // non-traceable author statement /// 4674 // protein serine/threonine kinase activity // inferred from sequence or structural similarity /// 4702 // receptor signaling protein serine/threonine kinase activity // inferred from electronic annotation /// 4713 // protein-tyrosine kinase activity // inferred from electronic annotation /// 5524 // ATP binding // inferre…	6468 // protein amino acid phosphorylation // non-traceable author statement /// 7017 // microtubule-based process // traceable author statement /// 7059 // chromosome segregation // inferred from electronic annotation /// 7067 // mitosis // inferred from electronic annotation /// 7098 // centrosome cycle // inferred from mutant phenotype /// 7100 // mitotic centrosome separation // inferred from…	5813 // centrosome // non-traceable author statement	IPR000719 // Protein kinase // 1.4E-86
12521	153720_at	0.954089	1.473	18.169	3.09e-18	5.7e-16	31.6002	FBgn0031495	CG17257	CG17257	CG17257	33516	46872 // metal ion binding // inferred from electronic annotation /// 5515 // protein binding // inferred from physical interaction /// 8270 // zinc ion binding // inferred from electronic annotation	---	---	IPR001594 // Zn-finger, DHHC type // 2.3E-12
7284	148483_at	1.24783	0.450584	18.1587	3.15e-18	5.72e-16	31.5838	FBgn0036028	CG16717	CG16717	CG16717	39129	16787 // hydrolase activity // inferred from electronic annotation	---	---	IPR004843 // Metallo-phosphoesterase // 1.6E-12
12815	154014_at	2.33164	1.47154	18.1037	3.43e-18	6.16e-16	31.4963	FBgn0032130	CG3838	CG3838	CG3838	34275	3677 // DNA binding // inferred from electronic annotation /// 5515 // protein binding // inferred from physical interaction	---	---	IPR004210 // BESS motif // 2.3E-13
1271	142470_s_at	0.957857	0.419195	18.0504	3.74e-18	6.63e-16	31.4112	FBgn0000307	CG5813	chif	chiffon	34974	3676 // nucleic acid binding // inferred from electronic annotation /// 3677 // DNA binding // inferred from electronic annotation /// 8270 // zinc ion binding // inferred from electronic annotation	6275 // regulation of DNA replication // non-traceable author statement /// 6355 // regulation of transcription, DNA-dependent // inferred from electronic annotation /// 7304 // eggshell formation (sensu Insecta) // inferred from mutant phenotype /// 7306 // insect chorion formation // non-traceable author statement /// 7307 // chorion gene amplification // inferred from mutant phenotype /// 6260…	5634 // nucleus // inferred from electronic annotation	---
2634	143833_at	2.35555	0.430061	18.0319	3.85e-18	6.74e-16	31.3816	FBgn0015621	CG3642	Clp	Clipper	33259	3676 // nucleic acid binding // inferred from electronic annotation /// 4521 // endoribonuclease activity // inferred from direct assay /// 5515 // protein binding // inferred from physical interaction /// 8270 // zinc ion binding // inferred from electronic annotation	6378 // mRNA polyadenylylation // inferred from sequence or structural similarity /// 6379 // mRNA cleavage // inferred from sequence or structural similarity /// 6378 // mRNA polyadenylylation // inferred from sequence similarity /// 6379 // mRNA cleavage // inferred from sequence similarity	5847 // mRNA cleavage and polyadenylation specificity factor complex // inferred from sequence or structural similarity /// 5847 // mRNA cleavage and polyadenylation specificity factor complex // inferred from sequence similarity	IPR001878 // Zn-finger, CCHC type // 8.0E-5 /// IPR001878 // Zn-finger, CCHC type // 1.4E-6 /// IPR000571 // Zn-finger, C-x8-C-x5-C-x3-H type // 1.3E-7
12383	153582_at	1.35075	1.96147	17.8307	5.31e-18	9.08e-16	31.0581	FBgn0032084	CG13101	CG13101	CG13101	34221	---	7275 // development // inferred from electronic annotation /// 7498 // mesoderm development // inferred from electronic annotation /// 7517 // muscle development // inferred from electronic annotation	---	---
7462	148661_at	1.10198	1.02602	17.6871	6.7e-18	1.13e-15	30.8252	FBgn0036288	CG10660	CG10660	CG10660	39422	---	---	---	---
9065	150264_at	1.12574	0.71864	16.8124	2.85e-17	4.43e-15	29.3712	FBgn0043457	CG5180	CG5180	CG5180	192508	5515 // protein binding // inferred from physical interaction	---	---	---
10481	151680_at	1.30214	1.46498	16.5737	4.27e-17	6.37e-15	28.9632	FBgn0051152	CG31152	CG31152	CG31152	326122	---	---	---	---
1123	142322_at	1.29135	0.309881	16.5574	4.39e-17	6.48e-15	28.9351	FBgn0034206	CG18469	CG18469	CG18469	36943	---	---	---	---
13961	155160_at	1.29878	1.40605	16.4062	5.69e-17	8.22e-15	28.674	FBgn0032516	CG9293	CG9293	CG9293	34752	3677 // DNA binding // inferred from electronic annotation /// 16407 // acetyltransferase activity // inferred from electronic annotation /// 16740 // transferase activity // inferred from electronic annotation /// 5515 // protein binding // inferred from physical interaction /// 5515 // protein binding // inferred from electronic annotation /// 8270 // zinc ion binding // inferred from electroni…	74 // regulation of progression through cell cycle // inferred from electronic annotation /// 6355 // regulation of transcription, DNA-dependent // inferred from electronic annotation /// 6412 // protein biosynthesis // inferred from electronic annotation /// 6915 // apoptosis // inferred from electronic annotation /// 6917 // induction of apoptosis // inferred from electronic annotation /// 7049…	---	IPR001965 // Zn-finger-like, PHD finger // 2.5E-19 /// IPR001965 // Zn-finger-like, PHD finger // 2.5E-19
8283	149482_at	2.54256	0.968858	16.3655	6.11e-17	8.73e-15	28.6033	FBgn0037568	CG9617	CG9617	CG9617	40982	---	---	---	IPR007699 // SGS // 4.0E-51 /// IPR007052 // CS domain // 6.1E-42
5188	146387_at	1.08281	1.38575	16.2057	8.05e-17	1.13e-14	28.3246	FBgn0032615	CG6012	CG6012	CG6012	35022	16616 // oxidoreductase activity, acting on the CH-OH group of donors, NAD or NADP as acceptor // inferred from sequence or structural similarity /// 16616 // oxidoreductase activity, acting on the CH-OH group of donors, NAD or NADP as acceptor // inferred from sequence similarity	8202 // steroid metabolism // inferred from electronic annotation	---	IPR002198 // Short-chain dehydrogenase/reductase SDR // 2.0E-39
9717	150916_at	0.975276	0.430134	16.1898	8.28e-17	1.15e-14	28.2967	FBgn0039808	CG12071	CG12071	CG12071	43660	3676 // nucleic acid binding // inferred from electronic annotation /// 8270 // zinc ion binding // inferred from electronic annotation /// 46872 // metal ion binding // inferred from electronic annotation	---	5634 // nucleus // inferred from electronic annotation	IPR007087 // Zn-finger, C2H2 type // 8.2E-6 /// IPR007087 // Zn-finger, C2H2 type // 2.0E-5
12137	153336_at	1.87294	2.8488	16.1678	8.6e-17	1.18e-14	28.2582	FBgn0002069	CG3821	Aats-asp	Aspartyl-tRNA synthetase	36420	3729 // mRNA binding // inferred from electronic annotation /// 4815 // aspartate-tRNA ligase activity // inferred from sequence or structural similarity /// 5524 // ATP binding // inferred from electronic annotation /// 5515 // protein binding // inferred from physical interaction /// 3676 // nucleic acid binding // inferred from electronic annotation /// 4812 // aminoacyl-tRNA ligase activity /…	6422 // aspartyl-tRNA aminoacylation // inferred from sequence or structural similarity /// 40007 // growth // inferred from mutant phenotype /// 6418 // tRNA aminoacylation for protein translation // inferred from electronic annotation /// 6422 // aspartyl-tRNA aminoacylation // inferred from electronic annotation /// 6422 // aspartyl-tRNA aminoacylation // inferred from sequence similarity	5737 // cytoplasm // inferred from electronic annotation	IPR004365 // OB-fold nucleic acid binding domain // 3.7E-14 /// IPR004364 // tRNA synthetase, class II (D, K and N) // 1.0E-126
12745	153944_at	1.10053	1.9385	16.1082	9.55e-17	1.29e-14	28.1535	FBgn0027866	CG9776	CG9776	CG9776	40546	3676 // nucleic acid binding // inferred from electronic annotation /// 8270 // zinc ion binding // inferred from electronic annotation /// 5515 // protein binding // inferred from physical interaction	---	5634 // nucleus // inferred from electronic annotation	---
2708	143907_at	1.42482	2.69407	16.0347	1.09e-16	1.43e-14	28.0238	FBgn0019968	CG8183	Khc-73	Kinesin-73	36718	3777 // microtubule motor activity // inferred from sequence or structural similarity /// 5200 // structural constituent of cytoskeleton // inferred from electronic annotation /// 5524 // ATP binding // inferred from electronic annotation /// 8017 // microtubule binding // inferred from sequence or structural similarity /// 166 // nucleotide binding // inferred from electronic annotation /// 3774…	6605 // protein targeting // inferred from electronic annotation /// 6887 // exocytosis // inferred from electronic annotation /// 7018 // microtubule-based movement // inferred from sequence or structural similarity /// 7018 // microtubule-based movement // inferred from electronic annotation /// 7018 // microtubule-based movement // inferred from sequence similarity	5871 // kinesin complex // inferred from sequence or structural similarity /// 5874 // microtubule // inferred from electronic annotation /// 5875 // microtubule associated complex // inferred from electronic annotation /// 5871 // kinesin complex // inferred from sequence similarity	IPR000253 // Forkhead-associated (FHA) // 1.2E-12 /// IPR001752 // Kinesin, motor region // 1.0E-126 /// IPR000938 // CAP-Gly domain // 1.2E-37
13837	155036_at	1.87494	2.94931	15.9482	1.26e-16	1.66e-14	27.8706	FBgn0032961	CG1416	CG1416	CG1416	35426	---	---	---	IPR007821 // Protein of unknown function DUF704 // 1.3E-35
13727	154926_at	1.0893	0.426598	15.9186	1.33e-16	1.73e-14	27.8181	FBgn0002891	CG1925	mus205	mutagen-sensitive 205	47186	166 // nucleotide binding // inferred from electronic annotation /// 3676 // nucleic acid binding // inferred from electronic annotation /// 3677 // DNA binding // inferred from electronic annotation /// 3894 // zeta DNA polymerase activity // inferred from sequence or structural similarity /// 3894 // zeta DNA polymerase activity // non-traceable author statement /// 8408 // 3'-5' exonuclease ac…	6260 // DNA replication // non-traceable author statement /// 19985 // bypass DNA synthesis // non-traceable author statement /// 6260 // DNA replication // inferred from electronic annotation	16035 // zeta DNA polymerase complex // inferred from sequence or structural similarity /// 16035 // zeta DNA polymerase complex // non-traceable author statement /// 16035 // zeta DNA polymerase complex // inferred from sequence similarity	IPR006134 // DNA polymerase B domain // 1.0E-126
8134	149333_at	1.31903	0.704862	15.6361	2.2e-16	2.75e-14	27.3123	FBgn0037327	CG2087	PEK	PEK	40653	3743 // translation initiation factor activity // inferred from electronic annotation /// 4672 // protein kinase activity // non-traceable author statement /// 4686 // eukaryotic elongation factor-2 kinase activity // inferred from direct assay /// 4686 // eukaryotic elongation factor-2 kinase activity // inferred from sequence or structural similarity /// 4686 // eukaryotic elongation factor-2 k…	6118 // electron transport // inferred from electronic annotation /// 6412 // protein biosynthesis // inferred from electronic annotation /// 6468 // protein amino acid phosphorylation // non-traceable author statement /// 6983 // ER overload response // non-traceable author statement /// 6986 // response to unfolded protein // non-traceable author statement /// 17148 // negative regulation of pr…	5783 // endoplasmic reticulum // non-traceable author statement /// 5788 // endoplasmic reticulum lumen // non-traceable author statement /// 5783 // endoplasmic reticulum // inferred from electronic annotation /// 16020 // membrane // inferred from electronic annotation /// 16021 // integral to membrane // inferred from electronic annotation	IPR000719 // Protein kinase // 8.4E-18 /// IPR000719 // Protein kinase // 2.2E-41
12822	154021_at	0.915341	0.483757	15.5489	2.57e-16	3.19e-14	27.1548	FBgn0031456	CG2848	Trn-SR	Transportin-Serine/Arginine rich	33465	3677 // DNA binding // inferred from electronic annotation /// 5215 // transporter activity // inferred from electronic annotation /// 5515 // protein binding // inferred from physical interaction /// 8565 // protein transporter activity // inferred from electronic annotation /// 5488 // binding // inferred from electronic annotation	59 // protein import into nucleus, docking // inferred from electronic annotation /// 6355 // regulation of transcription, DNA-dependent // inferred from electronic annotation /// 6406 // mRNA export from nucleus // inferred from sequence or structural similarity /// 6606 // protein import into nucleus // inferred from sequence or structural similarity /// 35048 // splicing factor protein import …	5634 // nucleus // inferred from direct assay /// 5643 // nuclear pore // inferred from electronic annotation /// 5737 // cytoplasm // inferred from direct assay /// 5634 // nucleus // inferred from electronic annotation /// 5737 // cytoplasm // inferred from electronic annotation	IPR001494 // Importin-beta, N-terminal // 3.5E-16
197	141396_at	1.44935	-0.124277	15.5216	2.7e-16	3.31e-14	27.1052	FBgn0000640	CG3763	Fbp2	Fat body protein 2	34259	4022 // alcohol dehydrogenase activity // inferred from electronic annotation /// 16491 // oxidoreductase activity // non-traceable author statement /// 45735 // nutrient reservoir activity // non-traceable author statement /// 16491 // oxidoreductase activity // inferred from electronic annotation	6629 // lipid metabolism // inferred from electronic annotation /// 8152 // metabolism // inferred from electronic annotation	---	IPR002198 // Short-chain dehydrogenase/reductase SDR // 2.6E-31
7389	148588_at	1.27332	0.637933	15.5178	2.72e-16	3.31e-14	27.0984	FBgn0036181	CG18331	CG18331	CG18331	2768980	---	---	---	---
10853	152052_at	1.60031	2.11634	15.4982	2.82e-16	3.4e-14	27.0627	FBgn0027581	CG6191	CG6191	CG6191	36513	5515 // protein binding // inferred from physical interaction /// 16538 // cyclin-dependent protein kinase regulator activity // inferred from electronic annotation	51302 // regulation of cell division // inferred from electronic annotation /// 51726 // regulation of cell cycle // inferred from electronic annotation	---	---
2463	143662_at	1.33988	1.6019	15.392	3.41e-16	4.09e-14	26.8694	FBgn0011573	CG12019	Cdc37	Cdc37	38232	30296 // protein tyrosine kinase activator activity // non-traceable author statement /// 51082 // unfolded protein binding // inferred from sequence or structural similarity /// 51087 // chaperone binding // non-traceable author statement /// 51082 // unfolded protein binding // inferred from sequence similarity	74 // regulation of progression through cell cycle // inferred from electronic annotation /// 6457 // protein folding // inferred from electronic annotation /// 7169 // transmembrane receptor protein tyrosine kinase signaling pathway // non-traceable author statement /// 7243 // protein kinase cascade // non-traceable author statement	5737 // cytoplasm // inferred from direct assay	IPR004918 // Cdc37 family // 1.0E-126
12399	153598_at	1.26521	0.510217	15.343	3.73e-16	4.39e-14	26.7798	FBgn0031652	CG8873	CG8873	CG8873	33705	---	---	---	---
13546	154745_at	1.12434	0.406767	15.2863	4.14e-16	4.83e-14	26.6758	FBgn0032752	CG10702	CG10702	CG10702	35181	5006 // epidermal growth factor receptor activity // inferred from electronic annotation /// 5010 // insulin-like growth factor receptor activity // inferred from sequence or structural similarity /// 5524 // ATP binding // inferred from electronic annotation /// 4714 // transmembrane receptor protein tyrosine kinase activity // inferred from electronic annotation /// 5010 // insulin-like growth …	6468 // protein amino acid phosphorylation // inferred from electronic annotation /// 7169 // transmembrane receptor protein tyrosine kinase signaling pathway // inferred from electronic annotation	16020 // membrane // inferred from electronic annotation /// 16021 // integral to membrane // inferred from electronic annotation	IPR006211 // Furin-like cysteine rich region // 5.8E-7 /// IPR000494 // Epidermal growth-factor receptor (EGFR), L domain // 1.9E-33 /// IPR000494 // Epidermal growth-factor receptor (EGFR), L domain // 2.0E-35
1910	143109_at	0.850284	0.540628	15.2428	4.48e-16	5.16e-14	26.5959	FBgn0000357	CG6517	Cp18	Chorion protein 18	38998	5213 // structural constituent of chorion (sensu Insecta) // non-traceable author statement /// 5213 // structural constituent of chorion (sensu Insecta) // traceable author statement	7306 // insect chorion formation // non-traceable author statement	42600 // chorion // inferred from electronic annotation	IPR005649 // Chorion family 2 // 3.7E-19
5779	146978_s_at	2.06415	1.78354	15.1811	5.01e-16	5.62e-14	26.4822	FBgn0053503 /// FBgn0050489	CG30489	Cyp12d1-d /// Cyp12d1-p	Cyp12d1-d /// Cyp12d1-p	246648 /// 2768720	4497 // monooxygenase activity // inferred from electronic annotation /// 16491 // oxidoreductase activity // inferred from electronic annotation /// 4497 // monooxygenase activity // inferred from sequence or structural similarity /// 16491 // oxidoreductase activity // inferred from sequence or structural similarity /// 19825 // oxygen binding // inferred from sequence or structural similarity …	6118 // electron transport // inferred from electronic annotation /// 6118 // electron transport // inferred from sequence or structural similarity	5739 // mitochondrion // inferred from sequence or structural similarity /// 5739 // mitochondrion // non-traceable author statement /// 5739 // mitochondrion // inferred from electronic annotation /// 16020 // membrane // inferred from electronic annotation /// 5739 // mitochondrion // inferred from sequence similarity	IPR001128 // Cytochrome P450 // 1.1E-59 /// IPR001128 // Cytochrome P450 // 1.9E-61
10978	152177_at	1.83826	2.08828	15.1615	5.19e-16	5.78e-14	26.4458	FBgn0027565	CG5498	CG5498	CG5498	40250	---	---	---	IPR005024 // Snf7 // 3.6E-19
2987	144186_at	0.912139	0.883894	14.9002	8.41e-16	8.86e-14	25.9596	FBgn0027534	CG11006	CG11006	CG11006	39455	8234 // cysteine-type peptidase activity // inferred from electronic annotation	6508 // proteolysis // inferred from electronic annotation	---	---
7024	148223_at	1.31411	2.26794	14.8114	9.92e-16	1.02e-13	25.793	FBgn0035608	CG10630	CG10630	CG10630	38620	3725 // double-stranded RNA binding // inferred from electronic annotation	---	5622 // intracellular // inferred from electronic annotation	IPR001159 // Double-stranded RNA binding (DsRBD) domain // 3.3E-4
5380	146579_at	1.24603	0.649418	14.8051	1e-15	1.03e-13	25.781	FBgn0032934	CG8679	CG8679	CG8679	35395	---	---	5635 // nuclear envelope // inferred from electronic annotation	IPR003887 // Lamino-associated polypeptide 2/emerin // 2.7E-20 /// IPR002110 // Ankyrin // 27.0 /// IPR002110 // Ankyrin // 1.2E-7 /// IPR002110 // Ankyrin // 2.3
11258	152457_at	1.74306	1.62944	14.7627	1.09e-15	1.1e-13	25.7011	FBgn0035985	CG3672	CG3672	CG3672	39081	42302 // structural constituent of cuticle // inferred from electronic annotation	---	---	IPR000618 // Insect cuticle protein // 5.1E-5
1347	142546_at	1.57217	2.56679	14.7009	1.22e-15	1.22e-13	25.5843	FBgn0037560	CG18228	CG18228	CG18228	40971	3676 // nucleic acid binding // inferred from electronic annotation	---	5634 // nucleus // inferred from electronic annotation	---
4180	145379_at	1.10449	0.16216	14.5995	1.48e-15	1.46e-13	25.3918	FBgn0031036	CG14220	CG14220	CG14220	32954	---	---	---	---
5322	146521_at	1.3648	-0.478222	14.4958	1.8e-15	1.72e-13	25.1939	FBgn0032826	CG33316	CG33316	CG33316	2768936	---	---	---	---
8551	149750_at	0.821956	1.01456	14.503	1.77e-15	1.72e-13	25.2076	FBgn0038014	CG10041	CG10041	CG10041	41496	4252 // serine-type endopeptidase activity // inferred from sequence or structural similarity /// 4252 // serine-type endopeptidase activity // non-traceable author statement /// 4263 // chymotrypsin activity // inferred from electronic annotation /// 4295 // trypsin activity // inferred from electronic annotation /// 4252 // serine-type endopeptidase activity // inferred from electronic annotati…	6508 // proteolysis // non-traceable author statement /// 6508 // proteolysis // inferred from electronic annotation	---	IPR001254 // Peptidase S1, chymotrypsin // 5.5E-24
3543	144742_at	1.08973	1.06153	14.3881	2.2e-15	2.07e-13	24.9871	FBgn0030109	CG12121	CG12121	CG12121	31866	---	---	16021 // integral to membrane // inferred from electronic annotation	IPR009637 // Lung seven transmembrane receptor // 2.0E-93
13066	154265_at	1.5944	0.94422	14.3797	2.24e-15	2.09e-13	24.9709	FBgn0033342	CG8258	CG8258	CG8258	35882	5524 // ATP binding // inferred from electronic annotation /// 42623 // ATPase activity, coupled // inferred from sequence or structural similarity /// 51082 // unfolded protein binding // inferred from electronic annotation /// 166 // nucleotide binding // inferred from electronic annotation /// 5515 // protein binding // inferred from electronic annotation /// 42623 // ATPase activity, coupled …	6457 // protein folding // inferred from electronic annotation /// 6457 // protein folding // inferred from sequence or structural similarity /// 44267 // cellular protein metabolism // inferred from electronic annotation /// 6457 // protein folding // inferred from sequence similarity	5832 // chaperonin-containing T-complex // inferred from sequence or structural similarity /// 5832 // chaperonin-containing T-complex // inferred from sequence similarity	IPR002423 // Chaperonin Cpn60/TCP-1 // 1.0E-126
465	141664_at	1.10894	2.55967	14.3276	2.47e-15	2.28e-13	24.8705	FBgn0015245	CG12101	Hsp60	Heat shock protein 60	32045	5524 // ATP binding // inferred from electronic annotation /// 42623 // ATPase activity, coupled // inferred from electronic annotation /// 51082 // unfolded protein binding // inferred from sequence or structural similarity /// 166 // nucleotide binding // inferred from electronic annotation /// 5515 // protein binding // inferred from electronic annotation /// 51082 // unfolded protein binding …	6457 // protein folding // inferred from sequence or structural similarity /// 6457 // protein folding // non-traceable author statement /// 6458 // 'de novo' protein folding // inferred from sequence or structural similarity /// 6626 // protein targeting to mitochondrion // inferred from sequence or structural similarity /// 6950 // response to stress // non-traceable author statement /// 9408 /…	5739 // mitochondrion // inferred from direct assay /// 5759 // mitochondrial matrix // inferred from sequence or structural similarity /// 5759 // mitochondrial matrix // non-traceable author statement /// 5739 // mitochondrion // inferred from electronic annotation /// 5759 // mitochondrial matrix // inferred from sequence similarity	IPR002423 // Chaperonin Cpn60/TCP-1 // 1.0E-126
1330	142529_s_at	1.72704	1.91446	14.221	3.03e-15	2.73e-13	24.664	FBgn0036505	CG7945	CG7945	CG7945	39679	8061 // chitin binding // inferred from electronic annotation /// 51082 // unfolded protein binding // inferred from sequence or structural similarity /// 5515 // protein binding // inferred from physical interaction /// 51082 // unfolded protein binding // inferred from sequence similarity	6030 // chitin metabolism // inferred from electronic annotation /// 6457 // protein folding // inferred from sequence or structural similarity /// 6457 // protein folding // inferred from sequence similarity	5576 // extracellular region // inferred from electronic annotation	---
3092	144291_at	1.26762	-0.172173	13.953	5.1e-15	4.49e-13	24.1397	FBgn0053515	CG33515	CG33515	CG33515	3346206	---	---	---	IPR007110 // Immunoglobulin-like // 4.2E-8 /// IPR007110 // Immunoglobulin-like // 3.1E-4 /// IPR007110 // Immunoglobulin-like // 0.025 /// IPR007110 // Immunoglobulin-like // 1.1E-4 /// IPR007110 // Immunoglobulin-like // 5.7E-4
5747	146946_s_at	2.10732	3.77399	13.9075	5.57e-15	4.79e-13	24.05	FBgn0033521 /// FBgn0033520 /// FBgn0033518	CG11765 /// CG12405 /// CG12896	CG12896 /// Prx2540-1 /// Prx2540-2	CG12896 /// Peroxiredoxin 2540 /// Peroxiredoxin 2540	246663 /// 36098 /// 36101	4601 // peroxidase activity // inferred from sequence or structural similarity /// 4601 // peroxidase activity // non-traceable author statement /// 4602 // glutathione peroxidase activity // inferred from sequence or structural similarity /// 16209 // antioxidant activity // inferred from sequence or structural similarity /// 16209 // antioxidant activity // non-traceable author statement /// 46…	6800 // oxygen and reactive oxygen species metabolism // inferred from electronic annotation /// 6952 // defense response // inferred from electronic annotation /// 7498 // mesoderm development // inferred from expression pattern	---	IPR000866 // Alkyl hydroperoxide reductase/ Thiol specific antioxidant/ Mal allergen // 5.7E-50 /// IPR000866 // Alkyl hydroperoxide reductase/ Thiol specific antioxidant/ Mal allergen // 5.4E-50
8594	149793_at	0.90266	-0.357529	13.7253	7.97e-15	6.77e-13	23.6883	FBgn0038073	CG14395	CG14395	CG14395	41560	---	---	---	---
5926	147125_at	2.55641	2.85333	13.5628	1.1e-14	9.01e-13	23.3628	FBgn0033787	CG13321	CG13321	CG13321	36430	5515 // protein binding // inferred from physical interaction	---	---	---
3322	144521_at	2.47162	3.06501	13.5443	1.14e-14	9.3e-13	23.3255	FBgn0029766	CG15784	CG15784	CG15784	31461	---	---	---	---
6817	148016_at	1.03149	1.04049	13.5022	1.24e-14	1.01e-12	23.2405	FBgn0035296	CG11814	CG11814	CG11814	38259	---	6605 // protein targeting // inferred from electronic annotation /// 6952 // defense response // inferred from electronic annotation /// 7041 // lysosomal transport // inferred from sequence or structural similarity /// 7041 // lysosomal transport // inferred from sequence similarity	---	IPR000409 // Beige/BEACH domain // 1.0E-126 /// IPR001680 // G-protein beta WD-40 repeat // 1.5E-4 /// IPR001680 // G-protein beta WD-40 repeat // 0.026
1822	143021_at	1.55188	0.188379	13.4839	1.29e-14	1.04e-12	23.2036	FBgn0051150	CG31150	CG31150	CG31150	41921	5319 // lipid transporter activity // inferred from electronic annotation /// 5515 // protein binding // inferred from physical interaction	6869 // lipid transport // inferred from electronic annotation	---	IPR001747 // Lipid transport protein, N-terminal // 1.4E-10 /// IPR001747 // Lipid transport protein, N-terminal // 1.6E-6
12163	153362_at	1.33724	1.27794	13.4486	1.38e-14	1.11e-12	23.1322	FBgn0021944	CG3433	Coprox	Coproporphyrinogen oxidase	44701	4109 // coproporphyrinogen oxidase activity // inferred from sequence or structural similarity /// 4109 // coproporphyrinogen oxidase activity // non-traceable author statement /// 5515 // protein binding // inferred from physical interaction /// 4109 // coproporphyrinogen oxidase activity // inferred from electronic annotation /// 16491 // oxidoreductase activity // inferred from electronic anno…	6732 // coenzyme metabolism // inferred from electronic annotation /// 6783 // heme biosynthesis // inferred from sequence or structural similarity /// 6783 // heme biosynthesis // non-traceable author statement /// 6779 // porphyrin biosynthesis // inferred from electronic annotation /// 6783 // heme biosynthesis // inferred from electronic annotation /// 6783 // heme biosynthesis // inferred fr…	5739 // mitochondrion // inferred from sequence or structural similarity /// 5739 // mitochondrion // inferred from sequence similarity	IPR001260 // Coproporphyrinogen III oxidase // 1.0E-126
7716	148915_at	1.41218	1.28616	13.4393	1.41e-14	1.12e-12	23.1133	FBgn0021768	CG9710	nudC	nudC	39879	---	7097 // nuclear migration // inferred from sequence or structural similarity /// 7097 // nuclear migration // non-traceable author statement /// 9993 // oogenesis (sensu Insecta) // non-traceable author statement /// 7097 // nuclear migration // inferred from sequence similarity	5737 // cytoplasm // inferred from direct assay	IPR005307 // Nuclear movement protein // 3.5E-124
12	141211_at	1.0699	1.18252	13.4358	1.42e-14	1.12e-12	23.1064	FBgn0035876	CG7081	CG7081	CG7081	38941	4842 // ubiquitin-protein ligase activity // inferred from electronic annotation /// 8270 // zinc ion binding // inferred from electronic annotation /// 5515 // protein binding // inferred from electronic annotation /// 46872 // metal ion binding // inferred from electronic annotation	6461 // protein complex assembly // inferred from electronic annotation /// 7031 // peroxisome organization and biogenesis // inferred from sequence or structural similarity /// 16567 // protein ubiquitination // inferred from electronic annotation /// 7031 // peroxisome organization and biogenesis // inferred from sequence similarity	151 // ubiquitin ligase complex // inferred from electronic annotation /// 5778 // peroxisomal membrane // inferred from sequence or structural similarity /// 5777 // peroxisome // inferred from electronic annotation /// 5778 // peroxisomal membrane // inferred from sequence similarity	IPR001841 // Zn-finger, RING // 2.1E-6 /// IPR006845 // Pex2 / Pex12, N-terminal // 2.5E-59
7569	148768_at	1.126	0.70646	13.4135	1.48e-14	1.16e-12	23.0611	FBgn0036450	CG13472	CG13472	CG13472	39612	3676 // nucleic acid binding // inferred from electronic annotation /// 3723 // RNA binding // inferred from electronic annotation	245 // spliceosome assembly // inferred from electronic annotation /// 6397 // mRNA processing // inferred from electronic annotation	5634 // nucleus // inferred from electronic annotation /// 5737 // cytoplasm // inferred from electronic annotation	IPR000449 // Ubiquitin-associated domain // 4.1E-10
3261	144460_at	1.30084	0.587534	13.3469	1.69e-14	1.31e-12	22.9257	FBgn0029689	CG6428	CG6428	CG6428	31351	4067 // asparaginase activity // inferred from electronic annotation /// 4622 // lysophospholipase activity // inferred from sequence or structural similarity /// 5515 // protein binding // inferred from physical interaction /// 4622 // lysophospholipase activity // inferred from sequence similarity	9063 // amino acid catabolism // inferred from electronic annotation /// 6520 // amino acid metabolism // inferred from electronic annotation	---	IPR006034 // Asparaginase/glutaminase // 1.2E-53 /// IPR002110 // Ankyrin // 3.8E-11 /// IPR002110 // Ankyrin // 2.1E-4 /// IPR002110 // Ankyrin // 2.7E-5 /// IPR002110 // Ankyrin // 24.0
2764	143963_at	0.831761	0.789664	13.3427	1.71e-14	1.32e-12	22.9172	FBgn0022724	CG7128	Taf8	TBP-associated factor 8	32792	3702 // RNA polymerase II transcription factor activity // inferred from direct assay /// 5515 // protein binding // inferred from physical interaction	6367 // transcription initiation from RNA polymerase II promoter // inferred from direct assay /// 50875 // cellular physiological process // inferred from mutant phenotype /// 6350 // transcription // inferred from electronic annotation /// 6355 // regulation of transcription, DNA-dependent // inferred from electronic annotation	5669 // transcription factor TFIID complex // inferred from direct assay /// 5634 // nucleus // inferred from electronic annotation	---
5651	146850_at	0.964088	-0.157363	13.2274	2.16e-14	1.64e-12	22.6816	FBgn0033355	CG13748	CG13748	CG13748	35896	4867 // serine-type endopeptidase inhibitor activity // inferred from sequence or structural similarity /// 4867 // serine-type endopeptidase inhibitor activity // inferred from sequence similarity	---	---	IPR002223 // Pancreatic trypsin inhibitor (Kunitz) // 8.2E-30
4717	145916_at	1.034	0.926949	13.185	2.35e-14	1.77e-12	22.5947	FBgn0051635	CG31635	CG31635	CG31635	33928	5515 // protein binding // inferred from physical interaction	---	---	IPR001611 // Leucine-rich repeat // 0.84
12907	154106_at	1.26589	1.49078	13.0522	3.08e-14	2.27e-12	22.3209	FBgn0027508	CG4719	tankyrase	tankyrase	43095	3779 // actin binding // inferred from electronic annotation /// 5200 // structural constituent of cytoskeleton // inferred from sequence or structural similarity /// 16779 // nucleotidyltransferase activity // inferred from electronic annotation /// 3950 // NAD+ ADP-ribosyltransferase activity // inferred from electronic annotation /// 5200 // structural constituent of cytoskeleton // inferred f…	6260 // DNA replication // inferred from electronic annotation /// 6410 // transcription, RNA-dependent // inferred from electronic annotation /// 6471 // protein amino acid ADP-ribosylation // inferred from electronic annotation /// 7016 // cytoskeletal anchoring // inferred from sequence or structural similarity /// 7016 // cytoskeletal anchoring // inferred from sequence similarity	5634 // nucleus // inferred from electronic annotation	IPR002110 // Ankyrin // 7.6E-8 /// IPR002110 // Ankyrin // 8.3E-9 /// IPR002110 // Ankyrin // 6.8E-8 /// IPR002110 // Ankyrin // 2.4E-9 /// IPR002110 // Ankyrin // 1.3E-8 /// IPR002110 // Ankyrin // 9.3E-8 /// IPR002110 // Ankyrin // 5.6E-4 /// IPR002110 // Ankyrin // 2.0E-7 /// IPR002110 // Ankyrin // 0.041 /// IPR002110 // Ankyrin // 11.0 /// IPR002110 // Ankyrin // 5.7E-8 /// IPR002110 // Anky…
13802	155001_at	1.1474	2.66916	12.9653	3.68e-14	2.67e-12	22.1406	FBgn0033677	CG8321	CG8321	CG8321	36287	---	---	---	---
5748	146947_at	1.76976	0.462352	12.8634	4.54e-14	3.23e-12	21.9284	FBgn0033519	CG11825	CG11825	CG11825	36099	---	---	---	IPR007667 // Hypoxia induced protein conserved region // 2.3E-35
34	141233_at	2.06205	2.76223	12.8466	4.7e-14	3.33e-12	21.8932	FBgn0029831	CG5966	CG5966	CG5966	31532	4806 // triacylglycerol lipase activity // inferred from sequence or structural similarity /// 3824 // catalytic activity // inferred from electronic annotation /// 4806 // triacylglycerol lipase activity // inferred from sequence similarity	6629 // lipid metabolism // inferred from electronic annotation	---	IPR000734 // Lipase // 5.1E-77
4378	145577_at	1.22288	0.894058	12.8209	4.96e-14	3.47e-12	21.8393	FBgn0051924	CG31924	CG31924	CG31924	319030	16787 // hydrolase activity // inferred from sequence or structural similarity /// 3824 // catalytic activity // inferred from electronic annotation /// 16787 // hydrolase activity // inferred from sequence similarity	8152 // metabolism // inferred from electronic annotation	---	IPR005834 // Haloacid dehalogenase-like hydrolase // 6.5E-12 /// IPR005834 // Haloacid dehalogenase-like hydrolase // 7.7E-17
10653	151852_at	1.00253	2.27682	12.7773	5.43e-14	3.78e-12	21.7478	FBgn0053111	CG33111	CG33111	CG33111	50068	3723 // RNA binding // inferred from electronic annotation	35071 // salivary gland cell autophagic cell death // inferred from expression pattern /// 48102 // autophagic cell death // inferred from expression pattern	---	---
1638	142837_at	0.905177	2.01004	12.7638	5.58e-14	3.85e-12	21.7195	FBgn0068141	CG4460 /// CG4456	DyakHsp67Bb	Hsp67Bb	---	---	8340 // determination of adult life span // inferred from mutant phenotype /// 9408 // response to heat // inferred from sequence or structural similarity /// 9408 // response to heat // non-traceable author statement /// 42026 // protein refolding // non-traceable author statement /// 6457 // protein folding // inferred from electronic annotation /// 6986 // response to unfolded protein // infer…	---	---
13427	154626_at	1.73506	2.28368	12.7476	5.77e-14	3.95e-12	21.6855	FBgn0026418	CG6603	Hsc70Cb	Hsc70Cb	39557	5524 // ATP binding // inferred from electronic annotation /// 51087 // chaperone binding // inferred from sequence or structural similarity /// 51087 // chaperone binding // inferred from sequence similarity	6457 // protein folding // inferred from sequence or structural similarity /// 6950 // response to stress // inferred from electronic annotation /// 6952 // defense response // inferred from electronic annotation /// 6457 // protein folding // inferred from sequence similarity	---	IPR001023 // Heat shock protein Hsp70 // 1.0E-126
8373	149572_at	1.12503	0.702696	12.711	6.23e-14	4.2e-12	21.6084	FBgn0012344	CG8348	Dh	Diuretic hormone	41170	1584 // rhodopsin-like receptor activity // inferred from electronic annotation /// 5184 // neuropeptide hormone activity // inferred from sequence or structural similarity /// 8613 // diuretic hormone activity // non-traceable author statement /// 5179 // hormone activity // inferred from electronic annotation /// 5184 // neuropeptide hormone activity // inferred from sequence similarity	7218 // neuropeptide signaling pathway // inferred from sequence or structural similarity /// 7589 // fluid secretion // inferred from direct assay /// 7218 // neuropeptide signaling pathway // inferred from sequence similarity	5576 // extracellular region // inferred from electronic annotation /// 16021 // integral to membrane // inferred from electronic annotation	IPR000187 // Corticotropin-releasing factor, CRF // 1.3E-13
5558	146757_at	2.52754	1.4887	12.7058	6.3e-14	4.22e-12	21.5974	FBgn0033204	CG2065	CG2065	CG2065	35707	16491 // oxidoreductase activity // inferred from electronic annotation	8152 // metabolism // inferred from electronic annotation	---	IPR002198 // Short-chain dehydrogenase/reductase SDR // 2.1E-35
12571	153770_at	1.02939	2.09045	12.7019	6.35e-14	4.22e-12	21.5892	FBgn0035461	CG10855	CG10855	CG10855	38443	5515 // protein binding // inferred from physical interaction	---	---	IPR001810 // Cyclin-like F-box // 1.0E-5
1846	143045_at	1.00359	0.843236	12.6699	6.79e-14	4.44e-12	21.5217	FBgn0038098	CG7381	CG7381	CG7381	41589	---	---	16020 // membrane // inferred from electronic annotation /// 16021 // integral to membrane // inferred from electronic annotation	---
12273	153472_at	1.03818	1.03101	12.5184	9.33e-14	5.91e-12	21.2002	FBgn0033979	CG10243	Cyp6a19	Cyp6a19	36662	4497 // monooxygenase activity // inferred from electronic annotation /// 16491 // oxidoreductase activity // inferred from electronic annotation /// 5506 // iron ion binding // inferred from electronic annotation /// 20037 // heme binding // inferred from electronic annotation /// 46872 // metal ion binding // inferred from electronic annotation	6118 // electron transport // inferred from electronic annotation /// 8202 // steroid metabolism // inferred from electronic annotation	5792 // microsome // non-traceable author statement /// 16020 // membrane // non-traceable author statement /// 5783 // endoplasmic reticulum // inferred from electronic annotation /// 5792 // microsome // inferred from electronic annotation	IPR001128 // Cytochrome P450 // 7.6E-111
12466	153665_at	1.60213	3.36218	12.4153	1.16e-13	7.16e-12	20.9799	---	---	---	---	---	4672 // protein kinase activity // inferred from electronic annotation /// 4740 // [pyruvate dehydrogenase (lipoamide)] kinase activity // inferred from sequence or structural similarity /// 4740 // [pyruvate dehydrogenase (lipoamide)] kinase activity // non-traceable author statement /// 5524 // ATP binding // inferred from electronic annotation /// 16491 // oxidoreductase activity // inferred f…	6090 // pyruvate metabolism // inferred from sequence or structural similarity /// 6099 // tricarboxylic acid cycle // inferred from electronic annotation /// 6468 // protein amino acid phosphorylation // inferred from electronic annotation /// 19220 // regulation of phosphate metabolism // inferred from electronic annotation	5759 // mitochondrial matrix // inferred from sequence or structural similarity /// 5759 // mitochondrial matrix // non-traceable author statement /// 5739 // mitochondrion // inferred from electronic annotation	---
2472	143671_at	1.04897	5.90365	12.2967	1.49e-13	9.09e-12	20.725	FBgn0011668	CG9074	Mst57Da	Male-specific RNA 57Da	47954	5515 // protein binding // inferred from physical interaction	6952 // defense response // inferred from sequence or structural similarity /// 18991 // oviposition // non-traceable author statement /// 45297 // post-mating behavior // non-traceable author statement /// 7610 // behavior // inferred from electronic annotation /// 6952 // defense response // inferred from sequence similarity	5576 // extracellular region // non-traceable author statement	---
3019	144218_at	1.74478	1.40519	12.2932	1.5e-13	9.11e-12	20.7174	FBgn0028494	CG6424	CG6424	CG6424	37012	---	---	---	---
9018	150217_s_at	1.62557	1.26622	12.2862	1.53e-13	9.21e-12	20.7025	FBgn0038731 /// FBgn0038730	CG6300 /// CG11659	CG11659 /// CG6300	CG11659 /// CG6300	42351 /// 42352	3779 // actin binding // inferred from electronic annotation /// 5324 // long-chain fatty acid transporter activity // inferred from sequence or structural similarity /// 16874 // ligase activity // inferred from electronic annotation /// 5515 // protein binding // inferred from physical interaction /// 3824 // catalytic activity // inferred from electronic annotation /// 5324 // long-chain fatty…	8152 // metabolism // inferred from electronic annotation	---	IPR000873 // AMP-dependent synthetase and ligase // 1.3E-84 /// IPR000873 // AMP-dependent synthetase and ligase // 8.7E-84
143	141342_at	1.47615	2.73874	12.2593	1.62e-13	9.71e-12	20.6443	FBgn0033853	CG6145	CG6145	CG6145	36506	3951 // NAD+ kinase activity // inferred from electronic annotation	8152 // metabolism // inferred from electronic annotation	---	IPR002504 // ATP-NAD kinase // 7.5E-20 /// IPR002504 // ATP-NAD kinase // 3.5E-40 /// IPR002504 // ATP-NAD kinase // 7.5E-20 /// IPR002504 // ATP-NAD kinase // 3.5E-40 /// IPR002504 // ATP-NAD kinase // 7.5E-20 /// IPR002504 // ATP-NAD kinase // 3.5E-40
7368	148567_at	0.937268	-0.485342	12.2526	1.64e-13	9.81e-12	20.6298	FBgn0036150	CG6185	CG6185	CG6185	39269	4970 // ionotropic glutamate receptor activity // inferred from electronic annotation /// 5234 // glutamate-gated ion channel activity // inferred from sequence or structural similarity /// 5234 // glutamate-gated ion channel activity // inferred from sequence similarity	---	16020 // membrane // inferred from electronic annotation	---
85	141284_at	1.12325	1.01429	12.1363	2.1e-13	1.24e-11	20.3775	FBgn0039039	CG4677	lmd	lame duck	42717	3700 // transcription factor activity // inferred from sequence or structural similarity /// 8270 // zinc ion binding // inferred from electronic annotation /// 3676 // nucleic acid binding // inferred from electronic annotation /// 46872 // metal ion binding // inferred from electronic annotation /// 3700 // transcription factor activity // inferred from sequence similarity	6355 // regulation of transcription, DNA-dependent // inferred from sequence or structural similarity /// 6357 // regulation of transcription from RNA polymerase II promoter // inferred from electronic annotation /// 7517 // muscle development // inferred from mutant phenotype /// 7517 // muscle development // traceable author statement /// 7519 // striated muscle development // inferred from mut…	5634 // nucleus // inferred from sequence or structural similarity /// 5634 // nucleus // inferred from electronic annotation /// 5634 // nucleus // inferred from sequence similarity	IPR007087 // Zn-finger, C2H2 type // 1.5E-6 /// IPR007087 // Zn-finger, C2H2 type // 7.1E-5 /// IPR007087 // Zn-finger, C2H2 type // 2.0E-5 /// IPR007087 // Zn-finger, C2H2 type // 1.5E-6 /// IPR007087 // Zn-finger, C2H2 type // 7.1E-5 /// IPR007087 // Zn-finger, C2H2 type // 2.0E-5
11284	152483_at	0.911957	5.13612	12.1196	2.18e-13	1.28e-11	20.3413	FBgn0035915	CG6372	CG6372	CG6372	38986	4178 // leucyl aminopeptidase activity // inferred from sequence or structural similarity /// 4177 // aminopeptidase activity // inferred from electronic annotation /// 4178 // leucyl aminopeptidase activity // inferred from sequence similarity	6508 // proteolysis // inferred from electronic annotation	5622 // intracellular // inferred from electronic annotation	IPR008283 // Peptidase M17, cytosol aminopeptidase, N-terminal // 7.1E-54 /// IPR000819 // Peptidase M17, cytosol aminopeptidase, C-terminal // 1.5E-93
11399	152598_at	1.75817	2.91714	12.1025	2.26e-13	1.32e-11	20.304	FBgn0034335	CG5164	GstE1	Glutathione S transferase E1	37106	4364 // glutathione transferase activity // inferred from sequence or structural similarity /// 4364 // glutathione transferase activity // non-traceable author statement /// 5515 // protein binding // inferred from physical interaction /// 16740 // transferase activity // inferred from electronic annotation /// 4364 // glutathione transferase activity // inferred from sequence similarity	6952 // defense response // inferred from electronic annotation /// 6979 // response to oxidative stress // non-traceable author statement /// 9636 // response to toxin // inferred from electronic annotation	---	IPR004046 // Glutathione S-transferase, C-terminal // 4.7E-11 /// IPR004045 // Glutathione S-transferase, N-terminal // 1.1E-19
5356	146555_at	1.27229	2.73881	12.0708	2.42e-13	1.4e-11	20.2349	FBgn0028986	CG9334	Spn3	Serine protease inhibitor 3	49806	4867 // serine-type endopeptidase inhibitor activity // inferred from sequence or structural similarity /// 4867 // serine-type endopeptidase inhibitor activity // non-traceable author statement /// 4867 // serine-type endopeptidase inhibitor activity // inferred from electronic annotation /// 8233 // peptidase activity // inferred from electronic annotation /// 4867 // serine-type endopeptidase …	6508 // proteolysis // inferred from electronic annotation /// 45861 // negative regulation of proteolysis // inferred from sequence or structural similarity /// 45861 // negative regulation of proteolysis // inferred from sequence similarity	---	IPR000215 // Serpin // 1.4E-106
3061	144260_at	1.05698	2.19617	12.0271	2.66e-13	1.51e-11	20.1393	FBgn0028848	CG7311	CG7311	CG7311	34776	4368 // glycerol-3-phosphate dehydrogenase activity // inferred from sequence or structural similarity /// 16491 // oxidoreductase activity // inferred from electronic annotation /// 4368 // glycerol-3-phosphate dehydrogenase activity // inferred from electronic annotation /// 4368 // glycerol-3-phosphate dehydrogenase activity // inferred from sequence similarity	6072 // glycerol-3-phosphate metabolism // inferred from electronic annotation /// 6118 // electron transport // inferred from electronic annotation /// 6629 // lipid metabolism // inferred from electronic annotation	5739 // mitochondrion // inferred from sequence or structural similarity /// 9331 // glycerol-3-phosphate dehydrogenase complex // inferred from electronic annotation /// 5739 // mitochondrion // inferred from sequence similarity	IPR006076 // FAD dependent oxidoreductase // 1.9E-37 /// IPR006076 // FAD dependent oxidoreductase // 5.2E-11
9496	150695_at	0.711224	-0.109154	12.0231	2.68e-13	1.52e-11	20.1306	FBgn0039466	CG5521	CG5521	CG5521	43242	---	---	---	IPR000331 // Rap/ran-GAP // 9.6E-20
8020	149219_at	0.649564	1.26898	11.9771	2.96e-13	1.64e-11	20.0297	FBgn0037147	CG7140	CG7140	CG7140	40445	4345 // glucose-6-phosphate 1-dehydrogenase activity // inferred from sequence or structural similarity /// 4345 // glucose-6-phosphate 1-dehydrogenase activity // inferred from electronic annotation /// 16491 // oxidoreductase activity // inferred from electronic annotation /// 4345 // glucose-6-phosphate 1-dehydrogenase activity // inferred from sequence similarity	5996 // monosaccharide metabolism // inferred from electronic annotation /// 6006 // glucose metabolism // inferred from electronic annotation /// 5975 // carbohydrate metabolism // inferred from electronic annotation	---	IPR001282 // Glucose-6-phosphate dehydrogenase // 1.4E-76 /// IPR001282 // Glucose-6-phosphate dehydrogenase // 1.0E-65
9103	150302_at	0.940034	0.800735	11.9105	3.43e-13	1.86e-11	19.8832	FBgn0038866	CG5810	CG5810	CG5810	42513	4672 // protein kinase activity // inferred from electronic annotation /// 4675 // transmembrane receptor protein serine/threonine kinase activity // inferred from electronic annotation /// 4872 // receptor activity // inferred from electronic annotation /// 16301 // kinase activity // inferred from electronic annotation /// 19199 // transmembrane receptor protein kinase activity // inferred from…	6952 // defense response // inferred from electronic annotation /// 7155 // cell adhesion // inferred from electronic annotation /// 7165 // signal transduction // inferred from electronic annotation /// 7166 // cell surface receptor linked signal transduction // inferred from electronic annotation /// 7275 // development // inferred from electronic annotation /// 9950 // dorsal/ventral axis spec…	---	IPR001611 // Leucine-rich repeat // 0.22 /// IPR001611 // Leucine-rich repeat // 5.1E-5 /// IPR001611 // Leucine-rich repeat // 0.0037 /// IPR001611 // Leucine-rich repeat // 0.22
5712	146911_at	1.32566	1.90544	11.8344	4.04e-13	2.19e-11	19.7154	FBgn0033465	CG12140	CG12140	CG12140	36031	4174 // electron-transferring-flavoprotein dehydrogenase activity // inferred from sequence or structural similarity /// 5515 // protein binding // inferred from physical interaction /// 4174 // electron-transferring-flavoprotein dehydrogenase activity // inferred from electronic annotation /// 16491 // oxidoreductase activity // inferred from electronic annotation /// 4174 // electron-transferri…	6118 // electron transport // inferred from electronic annotation /// 6119 // oxidative phosphorylation // inferred from sequence or structural similarity /// 6119 // oxidative phosphorylation // inferred from sequence similarity	5743 // mitochondrial inner membrane // inferred from sequence or structural similarity /// 5743 // mitochondrial inner membrane // inferred from sequence similarity	IPR007859 // Electron transfer flavoprotein-ubiquinone oxidoreductase // 1.5E-119
11639	152838_at	0.846044	1.13141	11.7885	4.47e-13	2.39e-11	19.6136	FBgn0030823	CG8918	CG8918	CG8918	32704	4835 // tubulin-tyrosine ligase activity // inferred from electronic annotation /// 5200 // structural constituent of cytoskeleton // inferred from electronic annotation /// 16874 // ligase activity // inferred from electronic annotation	6464 // protein modification // inferred from electronic annotation /// 19538 // protein metabolism // inferred from electronic annotation	---	IPR004344 // Tubulin-tyrosine ligase // 1.0E-126
1339	142538_at	1.30922	1.97662	11.6519	6.04e-13	3.16e-11	19.3096	FBgn0063493	CG17531	GstE7	Glutathione S transferase E7	37112	4364 // glutathione transferase activity // inferred from sequence or structural similarity /// 4364 // glutathione transferase activity // inferred from sequence similarity	6800 // oxygen and reactive oxygen species metabolism // inferred from electronic annotation /// 6952 // defense response // inferred from electronic annotation /// 9636 // response to toxin // inferred from electronic annotation	---	IPR004046 // Glutathione S-transferase, C-terminal // 3.3E-13 /// IPR004045 // Glutathione S-transferase, N-terminal // 7.1E-20
3327	144526_at	0.692155	-0.10143	11.5879	6.95e-13	3.61e-11	19.1662	FBgn0053980	---	CG33980	CG33980	31469	3700 // transcription factor activity // inferred from sequence or structural similarity /// 5515 // protein binding // inferred from physical interaction /// 3677 // DNA binding // inferred from electronic annotation /// 3700 // transcription factor activity // inferred from electronic annotation /// 43565 // sequence-specific DNA binding // inferred from electronic annotation /// 3700 // transc…	6355 // regulation of transcription, DNA-dependent // inferred from sequence or structural similarity /// 6357 // regulation of transcription from RNA polymerase II promoter // inferred from electronic annotation /// 6355 // regulation of transcription, DNA-dependent // inferred from electronic annotation /// 7275 // development // inferred from electronic annotation /// 45449 // regulation of tr…	5634 // nucleus // inferred from sequence or structural similarity /// 5634 // nucleus // inferred from electronic annotation /// 5634 // nucleus // inferred from sequence similarity	---
12888	154087_at	0.982978	1.69819	11.5517	7.54e-13	3.87e-11	19.085	FBgn0011655	CG1775	Med	Medea	43725	3677 // DNA binding // traceable author statement /// 3702 // RNA polymerase II transcription factor activity // non-traceable author statement /// 5515 // protein binding // inferred from physical interaction /// 30616 // transforming growth factor beta receptor, common-partner cytoplasmic mediator activity // non-traceable author statement	6355 // regulation of transcription, DNA-dependent // non-traceable author statement /// 6357 // regulation of transcription from RNA polymerase II promoter // inferred from electronic annotation /// 7179 // transforming growth factor beta receptor signaling pathway // inferred from genetic interaction /// 7179 // transforming growth factor beta receptor signaling pathway // inferred from mutant …	5634 // nucleus // inferred from physical interaction /// 5634 // nucleus // traceable author statement /// 5737 // cytoplasm // inferred from direct assay /// 5622 // intracellular // inferred from electronic annotation	IPR003619 // Dwarfin protein, domain A // 4.6E-61 /// IPR001132 // Dwarfin protein // 9.5E-117 /// IPR001132 // Dwarfin protein // 9.5E-117
208	141407_at	0.76858	0.146967	11.5349	7.82e-13	3.98e-11	19.0473	FBgn0002564	CG6821	Lsp1	Larval serum protein 1	38015	5344 // oxygen transporter activity // inferred from electronic annotation /// 45735 // nutrient reservoir activity // non-traceable author statement /// 45735 // nutrient reservoir activity // inferred from electronic annotation	6810 // transport // inferred from electronic annotation	5576 // extracellular region // non-traceable author statement /// 5616 // larval serum protein complex // inferred from direct assay	IPR000896 // Arthropod hemocyanin/insect LSP // 2.0E-99 /// IPR005204 // Hemocyanin, N-terminal // 2.7E-36 /// IPR005203 // Hemocyanin, C-terminal // 1.6E-98
8824	150023_at	0.748061	1.31061	11.4888	8.67e-13	4.38e-11	18.9435	FBgn0038440	CG14901	Gr89a	Gr89a	42007	---	---	---	---
5165	146364_at	2.02724	0.585142	11.4416	9.63e-13	4.83e-11	18.8369	FBgn0032587	CG5953	CG5953	CG5953	34985	5515 // protein binding // inferred from physical interaction /// 42802 // identical protein binding // inferred from physical interaction	---	---	---
63	141262_at	0.695008	0.917013	11.4315	9.85e-13	4.93e-11	18.814	FBgn0038965	CG13852	mats	mob as tumor suppressor	42634	19207 // kinase regulator activity // inferred from electronic annotation /// 5515 // protein binding // inferred from physical interaction	910 // cytokinesis // inferred from electronic annotation /// 7049 // cell cycle // inferred from electronic annotation /// 7067 // mitosis // inferred from electronic annotation	---	IPR005301 // Mob1/phocein family // 8.6E-123
7491	148690_at	0.721476	0.928882	11.4222	1.01e-12	5.01e-11	18.793	FBgn0036335	CG11258	mRpL20	mitochondrial ribosomal protein L20	39477	3676 // nucleic acid binding // inferred from electronic annotation /// 3729 // mRNA binding // inferred from electronic annotation /// 3735 // structural constituent of ribosome // inferred from sequence or structural similarity /// 3735 // structural constituent of ribosome // inferred from sequence similarity	6412 // protein biosynthesis // inferred from sequence or structural similarity /// 6412 // protein biosynthesis // inferred from sequence similarity	5762 // mitochondrial large ribosomal subunit // inferred from sequence or structural similarity /// 5762 // mitochondrial large ribosomal subunit // inferred from sequence similarity	IPR005813 // Ribosomal protein L20 // 7.9E-13
10144	151343_r_at	0.827505	-0.0703594	11.3903	1.08e-12	5.33e-11	18.7208	FBgn0040870	CG12454	CG12454	CG12454	50343	---	---	---	---
1114	142313_at	0.886839	0.377891	11.3647	1.14e-12	5.58e-11	18.6628	FBgn0035870	CG7189	Gr66a	Gustatory receptor 66a	38935	4984 // olfactory receptor activity // inferred from electronic annotation /// 5549 // odorant binding // inferred from electronic annotation /// 8527 // taste receptor activity // non-traceable author statement	7608 // sensory perception of smell // inferred from electronic annotation /// 50909 // sensory perception of taste // non-traceable author statement	16021 // integral to membrane // non-traceable author statement	---
8295	149494_at	0.54297	0.457532	11.3647	1.14e-12	5.58e-11	18.6627	FBgn0037581	CG7352	CG7352	CG7352	40997	5198 // structural molecule activity // inferred from electronic annotation /// 5200 // structural constituent of cytoskeleton // inferred from electronic annotation /// 5099 // Ras GTPase activator activity // inferred from electronic annotation	7010 // cytoskeleton organization and biogenesis // inferred from electronic annotation /// 46580 // negative regulation of Ras protein signal transduction // inferred from electronic annotation	---	---
8464	149663_at	1.18137	1.54076	11.2981	1.33e-12	6.43e-11	18.5112	FBgn0040256	CG6633	Ugt86Dd	Ugt86Dd	53507	15020 // glucuronosyltransferase activity // inferred from sequence or structural similarity /// 16740 // transferase activity // inferred from electronic annotation /// 16757 // transferase activity, transferring glycosyl groups // inferred from electronic annotation /// 16758 // transferase activity, transferring hexosyl groups // inferred from electronic annotation /// 15020 // glucuronosyltra…	5976 // polysaccharide metabolism // inferred from electronic annotation /// 6952 // defense response // inferred from electronic annotation /// 8202 // steroid metabolism // inferred from electronic annotation /// 9636 // response to toxin // inferred from electronic annotation /// 8152 // metabolism // inferred from electronic annotation	---	IPR002213 // UDP-glucoronosyl/UDP-glucosyl transferase // 1.7E-74 /// IPR002213 // UDP-glucoronosyl/UDP-glucosyl transferase // 1.7E-74
6127	147326_at	0.70964	0.748117	11.2948	1.34e-12	6.44e-11	18.5037	FBgn0034151	CG15617	CG15617	CG15617	36871	5515 // protein binding // inferred from electronic annotation	---	---	IPR001478 // PDZ/DHR/GLGF domain // 6.1E-6
9678	150877_at	0.9903	0.866645	11.2932	1.34e-12	6.44e-11	18.5	FBgn0039752	CG15530	CG15530	CG15530	43589	---	---	---	---
11662	152861_at	1.66015	1.67718	11.2728	1.41e-12	6.68e-11	18.4536	FBgn0033391	CG8026	CG8026	CG8026	35941	5386 // carrier activity // inferred from sequence or structural similarity /// 5488 // binding // inferred from electronic annotation /// 8517 // folic acid transporter activity // inferred from sequence or structural similarity /// 5215 // transporter activity // inferred from electronic annotation /// 5386 // carrier activity // inferred from sequence similarity /// 8517 // folic acid transpor…	6839 // mitochondrial transport // inferred from sequence or structural similarity /// 15884 // folic acid transport // inferred from sequence or structural similarity /// 6810 // transport // inferred from electronic annotation /// 6839 // mitochondrial transport // inferred from electronic annotation /// 6839 // mitochondrial transport // inferred from sequence similarity /// 15884 // folic aci…	5740 // mitochondrial envelope // inferred from sequence or structural similarity /// 5743 // mitochondrial inner membrane // inferred from sequence or structural similarity /// 5739 // mitochondrion // inferred from electronic annotation /// 5743 // mitochondrial inner membrane // inferred from electronic annotation /// 16020 // membrane // inferred from electronic annotation /// 16021 // integr…	IPR001993 // Mitochondrial substrate carrier // 2.5E-30 /// IPR001993 // Mitochondrial substrate carrier // 4.4E-31 /// IPR001993 // Mitochondrial substrate carrier // 1.3E-16 /// IPR001993 // Mitochondrial substrate carrier // 1.7E-10
12783	153982_at	1.24135	0.959613	11.271	1.41e-12	6.68e-11	18.4494	FBgn0015019	CG8977	Cct	Cct	42029	5524 // ATP binding // inferred from electronic annotation /// 42623 // ATPase activity, coupled // inferred from sequence or structural similarity /// 42623 // ATPase activity, coupled // non-traceable author statement /// 51082 // unfolded protein binding // inferred from sequence or structural similarity /// 166 // nucleotide binding // inferred from electronic annotation /// 5515 // protein b…	6457 // protein folding // inferred from sequence or structural similarity /// 6457 // protein folding // non-traceable author statement /// 6457 // protein folding // inferred from electronic annotation /// 44267 // cellular protein metabolism // inferred from electronic annotation /// 6457 // protein folding // inferred from sequence similarity	5737 // cytoplasm // non-traceable author statement /// 5832 // chaperonin-containing T-complex // inferred from sequence or structural similarity /// 5832 // chaperonin-containing T-complex // inferred from sequence similarity	IPR002423 // Chaperonin Cpn60/TCP-1 // 1.0E-126
10196	151395_at	0.735048	-0.215624	11.2668	1.42e-12	6.72e-11	18.44	---	---	---	---	---	---	---	---	---
13389	154588_at	1.30548	1.93439	11.2512	1.48e-12	6.94e-11	18.4044	FBgn0010397	CG10119	LamC	Lamin C	36615	5200 // structural constituent of cytoskeleton // inferred from electronic annotation /// 5198 // structural molecule activity // inferred from electronic annotation	7010 // cytoskeleton organization and biogenesis // inferred from electronic annotation /// 7084 // mitotic nuclear envelope reassembly // inferred from sequence or structural similarity /// 7084 // mitotic nuclear envelope reassembly // inferred from sequence similarity	5638 // lamin filament // inferred from sequence or structural similarity /// 5638 // lamin filament // non-traceable author statement /// 5634 // nucleus // inferred from electronic annotation /// 5882 // intermediate filament // inferred from electronic annotation /// 5638 // lamin filament // inferred from sequence similarity	IPR001664 // Intermediate filament protein // 1.5E-70 /// IPR001322 // Intermediate filament, C-terminal // 2.4E-53
4518	145717_at	1.19865	3.63974	11.23	1.55e-12	7.18e-11	18.3559	FBgn0031545	CG3213	CG3213	CG3213	33574	3735 // structural constituent of ribosome // inferred from electronic annotation	6412 // protein biosynthesis // inferred from electronic annotation	5622 // intracellular // inferred from electronic annotation /// 5840 // ribosome // inferred from electronic annotation	---
382	141581_at	1.9543	1.66288	11.1629	1.8e-12	8.2e-11	18.2021	FBgn0034063	CG8389	CG8389	CG8389	36764	15355 // monocarboxylate porter activity // inferred from sequence or structural similarity /// 5215 // transporter activity // inferred from electronic annotation /// 15355 // monocarboxylate porter activity // inferred from sequence similarity	6810 // transport // inferred from electronic annotation	16021 // integral to membrane // inferred from electronic annotation /// 16020 // membrane // inferred from electronic annotation	---
12538	153737_at	0.935034	0.333839	11.1497	1.86e-12	8.39e-11	18.1717	FBgn0022772	CG10667	Orc1	Origin recognition complex subunit 1	35686	166 // nucleotide binding // inferred from electronic annotation /// 3677 // DNA binding // non-traceable author statement /// 3688 // DNA replication origin binding // inferred from electronic annotation /// 5524 // ATP binding // inferred from electronic annotation /// 17111 // nucleoside-triphosphatase activity // inferred from electronic annotation /// 3677 // DNA binding // inferred from ele…	74 // regulation of progression through cell cycle // inferred from electronic annotation /// 6261 // DNA-dependent DNA replication // inferred from sequence or structural similarity /// 6261 // DNA-dependent DNA replication // non-traceable author statement /// 6270 // DNA replication initiation // inferred from direct assay /// 6342 // chromatin silencing // non-traceable author statement /// 6…	5634 // nucleus // non-traceable author statement /// 5664 // nuclear origin of replication recognition complex // inferred from direct assay /// 5664 // nuclear origin of replication recognition complex // inferred from sequence or structural similarity /// 5664 // nuclear origin of replication recognition complex // non-traceable author statement /// 5634 // nucleus // inferred from electronic …	IPR003959 // AAA ATPase, central region // 1.5E-16 /// IPR001025 // Bromo adjacent region // 1.2E-25
5493	146692_at	0.853157	-0.520774	11.1366	1.91e-12	8.59e-11	18.1416	FBgn0033103	CG15235	CG15235	CG15235	35589	17034 // Rap guanyl-nucleotide exchange factor activity // inferred from sequence or structural similarity /// 17034 // Rap guanyl-nucleotide exchange factor activity // inferred from sequence similarity	---	---	IPR000595 // Cyclic nucleotide-binding domain // 7.3E-5
1801	143000_at	1.08699	1.37214	11.1349	1.92e-12	8.59e-11	18.1378	FBgn0032444	CG5525	CG5525	CG5525	34674	5524 // ATP binding // inferred from electronic annotation /// 42623 // ATPase activity, coupled // inferred from sequence or structural similarity /// 51082 // unfolded protein binding // inferred from electronic annotation /// 5515 // protein binding // inferred from physical interaction /// 166 // nucleotide binding // inferred from electronic annotation /// 5515 // protein binding // inferred…	6457 // protein folding // inferred from electronic annotation /// 44267 // cellular protein metabolism // inferred from electronic annotation	5832 // chaperonin-containing T-complex // inferred from sequence or structural similarity /// 5832 // chaperonin-containing T-complex // inferred from sequence similarity	IPR002423 // Chaperonin Cpn60/TCP-1 // 1.0E-126
11326	152525_at	1.30809	1.41457	11.1052	2.05e-12	9.17e-11	18.0693	FBgn0010460	CG5461	bun	bunched	34665	3700 // transcription factor activity // inferred from electronic annotation /// 3702 // RNA polymerase II transcription factor activity // non-traceable author statement /// 42803 // protein homodimerization activity // inferred from sequence or structural similarity /// 5515 // protein binding // inferred from physical interaction /// 42803 // protein homodimerization activity // inferred from …	1709 // cell fate determination // non-traceable author statement /// 1751 // eye photoreceptor cell differentiation (sensu Endopterygota) // inferred from mutant phenotype /// 6357 // regulation of transcription from RNA polymerase II promoter // inferred from electronic annotation /// 7304 // eggshell formation (sensu Insecta) // inferred from mutant phenotype /// 7422 // peripheral nervous sys…	5634 // nucleus // non-traceable author statement /// 5737 // cytoplasm // inferred from direct assay /// 5737 // cytoplasm // non-traceable author statement /// 5634 // nucleus // inferred from electronic annotation	IPR000580 // TSC-22 / Dip / Bun // 4.6E-44 /// IPR000580 // TSC-22 / Dip / Bun // 3.3E-42 /// IPR000580 // TSC-22 / Dip / Bun // 4.6E-44
5067	146266_at	0.934387	0.452156	11.0832	2.16e-12	9.54e-11	18.0187	FBgn0032401	CG6792	CG6792	CG6792	34622	3676 // nucleic acid binding // inferred from electronic annotation /// 5515 // protein binding // inferred from electronic annotation /// 8270 // zinc ion binding // inferred from electronic annotation /// 30528 // transcription regulator activity // inferred from electronic annotation /// 46872 // metal ion binding // inferred from electronic annotation	6139 // nucleobase, nucleoside, nucleotide and nucleic acid metabolism // inferred from electronic annotation /// 6357 // regulation of transcription from RNA polymerase II promoter // inferred from electronic annotation /// 6366 // transcription from RNA polymerase II promoter // inferred from electronic annotation /// 8283 // cell proliferation // inferred from electronic annotation	5634 // nucleus // inferred from electronic annotation	IPR007087 // Zn-finger, C2H2 type // 2.3E-5 /// IPR007087 // Zn-finger, C2H2 type // 1.1E-5
9201	150400_at	0.518919	0.381607	11.0841	2.16e-12	9.54e-11	18.0207	FBgn0039027	CG7031	CG7031	CG7031	42704	---	---	---	---
10399	151598_at	1.52734	1.41553	11.0677	2.24e-12	9.85e-11	17.9831	FBgn0035720	CG10077	CG10077	CG10077	38756	3676 // nucleic acid binding // inferred from electronic annotation /// 3724 // RNA helicase activity // inferred from sequence or structural similarity /// 5524 // ATP binding // inferred from electronic annotation /// 8026 // ATP-dependent helicase activity // inferred from electronic annotation /// 166 // nucleotide binding // inferred from electronic annotation /// 4386 // helicase activity /…	6139 // nucleobase, nucleoside, nucleotide and nucleic acid metabolism // inferred from electronic annotation	---	IPR001650 // Helicase, C-terminal // 4.4E-15 /// IPR001410 // DEAD/DEAH box helicase // 3.9E-19
2532	143731_at	1.09524	-0.170136	11.0535	2.31e-12	1.01e-10	17.9501	FBgn0013973	CG1470	Gyc100B	Guanylyl cyclase subunit at 100B	43682	4383 // guanylate cyclase activity // inferred from direct assay /// 4383 // guanylate cyclase activity // non-traceable author statement /// 4383 // guanylate cyclase activity // inferred from electronic annotation /// 16849 // phosphorus-oxygen lyase activity // inferred from electronic annotation /// 20037 // heme binding // inferred from electronic annotation	6182 // cGMP biosynthesis // traceable author statement /// 7263 // nitric oxide mediated signal transduction // inferred from electronic annotation /// 19725 // cell homeostasis // inferred from electronic annotation /// 6182 // cGMP biosynthesis // inferred from electronic annotation /// 7242 // intracellular signaling cascade // inferred from electronic annotation /// 9190 // cyclic nucleotide…	8074 // guanylate cyclase complex, soluble // inferred from direct assay	IPR001054 // Guanylate cyclase // 4.5E-82
2473	143672_at	1.38339	5.76972	11.0384	2.39e-12	1.05e-10	17.9153	FBgn0011669	CG5016	Mst57Db	Male-specific RNA 57Db	43122	4418 // hydroxymethylbilane synthase activity // inferred from electronic annotation	18991 // oviposition // non-traceable author statement /// 45297 // post-mating behavior // non-traceable author statement /// 6779 // porphyrin biosynthesis // inferred from electronic annotation	5576 // extracellular region // non-traceable author statement	---
7450	148649_at	0.558153	0.636732	11.0262	2.46e-12	1.07e-10	17.8871	FBgn0036273	CG10426	CG10426	CG10426	39404	46030 // inositol trisphosphate phosphatase activity // non-traceable author statement /// 5515 // protein binding // inferred from physical interaction /// 4437 // inositol or phosphatidylinositol phosphatase activity // inferred from electronic annotation	6886 // intracellular protein transport // inferred from electronic annotation /// 7242 // intracellular signaling cascade // inferred from electronic annotation /// 16192 // vesicle-mediated transport // inferred from electronic annotation /// 16311 // dephosphorylation // non-traceable author statement	---	IPR005135 // Endonuclease/exonuclease/phosphatase // 3.3E-44
1442	142641_at	0.687321	0.495534	10.9779	2.75e-12	1.18e-10	17.7752	FBgn0031344	CG7420	CG7420	CG7420	33332	5083 // small GTPase regulator activity // inferred from electronic annotation /// 5085 // guanyl-nucleotide exchange factor activity // inferred from electronic annotation	6139 // nucleobase, nucleoside, nucleotide and nucleic acid metabolism // inferred from electronic annotation /// 6810 // transport // inferred from electronic annotation /// 15931 // nucleobase, nucleoside, nucleotide and nucleic acid transport // inferred from electronic annotation	---	IPR000408 // Regulator of chromosome condensation, RCC1 // 3.0E-5
7441	148640_at	0.625903	-0.177017	10.9321	3.05e-12	1.3e-10	17.6689	FBgn0036264	CG11529	CG11529	CG11529	39395	4252 // serine-type endopeptidase activity // inferred from sequence or structural similarity /// 4263 // chymotrypsin activity // non-traceable author statement /// 4295 // trypsin activity // inferred from electronic annotation /// 4252 // serine-type endopeptidase activity // inferred from sequence similarity	6508 // proteolysis // non-traceable author statement	---	IPR001254 // Peptidase S1, chymotrypsin // 1.1E-64
8989	150188_at	0.899446	2.41293	10.9178	3.15e-12	1.34e-10	17.6356	FBgn0038697	CG3581	CG3581	CG3581	42315	3676 // nucleic acid binding // inferred from electronic annotation /// 3677 // DNA binding // inferred from electronic annotation /// 4386 // helicase activity // inferred from electronic annotation /// 5524 // ATP binding // inferred from electronic annotation	---	---	---
10092	151291_at	1.07671	-0.504026	10.8921	3.34e-12	1.4e-10	17.5758	FBgn0040817	CG14132	CG14132	CG14132	50290	---	---	---	---
12886	154085_at	1.24038	1.59069	10.892	3.34e-12	1.4e-10	17.5755	FBgn0000566	CG5345	Eip55E	Eip55E	37143	4123 // cystathionine gamma-lyase activity // non-traceable author statement /// 4123 // cystathionine gamma-lyase activity // traceable author statement /// 5515 // protein binding // inferred from physical interaction	96 // sulfur amino acid metabolism // non-traceable author statement /// 6520 // amino acid metabolism // inferred from electronic annotation	---	IPR000277 // Cys/Met metabolism pyridoxal-phosphate-dependent enzymes // 1.0E-126
7032	148231_at	0.963646	0.905241	10.8755	3.47e-12	1.45e-10	17.5372	FBgn0035624	CG12756	Eaf6	Eaf6	38637	---	---	35267 // TIP60 histone acetyltransferase complex // inferred from direct assay	---
2028	143227_at	0.788538	2.67793	10.8682	3.53e-12	1.47e-10	17.5201	FBgn0002431	CG9484	hyd	hyperplastic discs	41181	4842 // ubiquitin-protein ligase activity // inferred from sequence or structural similarity /// 4842 // ubiquitin-protein ligase activity // non-traceable author statement /// 4842 // ubiquitin-protein ligase activity // inferred from electronic annotation /// 8270 // zinc ion binding // inferred from electronic annotation /// 16874 // ligase activity // inferred from electronic annotation /// 4…	6512 // ubiquitin cycle // inferred from physical interaction /// 6512 // ubiquitin cycle // inferred from sequence or structural similarity /// 6512 // ubiquitin cycle // non-traceable author statement /// 7281 // germ cell development // non-traceable author statement /// 7283 // spermatogenesis // inferred from mutant phenotype /// 7444 // imaginal disc development // inferred from mutant phen…	5634 // nucleus // inferred from direct assay /// 5634 // nucleus // non-traceable author statement /// 5737 // cytoplasm // inferred from direct assay /// 5622 // intracellular // inferred from electronic annotation /// 5634 // nucleus // inferred from electronic annotation	IPR002004 // Polyadenylate-binding protein/HECT-associated // 3.6E-51 /// IPR000569 // HECT domain (Ubiquitin-protein ligase) // 1.0E-126 /// IPR003126 // Zn-finger (putative), N-recognin // 1.8E-28
207	141406_at	1.61762	1.97497	10.8402	3.77e-12	1.56e-10	17.4546	FBgn0037684	CG8129	CG8129	CG8129	41117	257 // nitrilase activity // inferred from electronic annotation /// 4794 // threonine ammonia-lyase activity // inferred from sequence or structural similarity /// 16597 // amino acid binding // inferred from electronic annotation /// 16836 // hydro-lyase activity // inferred from electronic annotation /// 5515 // protein binding // inferred from physical interaction /// 42802 // identical prote…	8652 // amino acid biosynthesis // inferred from electronic annotation /// 9063 // amino acid catabolism // inferred from electronic annotation /// 8152 // metabolism // inferred from electronic annotation	---	IPR002912 // Amino acid-binding ACT // 4.3E-6 /// IPR001926 // Pyridoxal-5-phosphate-dependent enzyme, beta subunit // 3.5E-74 /// IPR002912 // Amino acid-binding ACT // 4.3E-6 /// IPR001926 // Pyridoxal-5-phosphate-dependent enzyme, beta subunit // 9.4E-49
2100	143299_at	1.91468	5.8616	10.8414	3.76e-12	1.56e-10	17.4576	FBgn0003067	CG17725	Pepck	Phosphoenolpyruvate carboxykinase	37131	4613 // phosphoenolpyruvate carboxykinase (GTP) activity // inferred from sequence or structural similarity /// 5525 // GTP binding // inferred from electronic annotation /// 166 // nucleotide binding // inferred from electronic annotation /// 4611 // phosphoenolpyruvate carboxykinase activity // inferred from electronic annotation /// 4613 // phosphoenolpyruvate carboxykinase (GTP) activity // i…	6094 // gluconeogenesis // inferred from sequence or structural similarity /// 6094 // gluconeogenesis // non-traceable author statement /// 6094 // gluconeogenesis // inferred from electronic annotation /// 6094 // gluconeogenesis // inferred from sequence similarity	5739 // mitochondrion // inferred from sequence or structural similarity /// 5739 // mitochondrion // inferred from sequence similarity	IPR008209 // Phosphoenolpyruvate carboxykinase (GTP) // 1.0E-126 /// IPR008209 // Phosphoenolpyruvate carboxykinase (GTP) // 1.0E-126
9377	150576_at	0.92535	2.6363	10.7521	4.62e-12	1.87e-10	17.2484	FBgn0039312	CG10514	CG10514	CG10514	43052	5515 // protein binding // inferred from physical interaction /// 16301 // kinase activity // inferred from electronic annotation /// 16740 // transferase activity // inferred from electronic annotation	---	---	IPR004119 // Protein of unknown function DUF227 // 2.2E-121
9516	150715_at	0.811766	0.641779	10.7486	4.66e-12	1.88e-10	17.2402	FBgn0039492	CG6051	CG6051	CG6051	43271	8270 // zinc ion binding // inferred from electronic annotation	---	---	IPR000306 // Zn-finger, FYVE type // 1.3E-28 /// IPR000306 // Zn-finger, FYVE type // 1.3E-28
5141	146340_at	0.740333	1.25016	10.7357	4.8e-12	1.93e-10	17.2098	FBgn0032525	CG16954	CG16954	CG16954	34763	3700 // transcription factor activity // inferred from electronic annotation /// 5524 // ATP binding // inferred from electronic annotation /// 42623 // ATPase activity, coupled // inferred from electronic annotation /// 51082 // unfolded protein binding // inferred from electronic annotation /// 166 // nucleotide binding // inferred from electronic annotation /// 5515 // protein binding // infer…	6355 // regulation of transcription, DNA-dependent // inferred from electronic annotation /// 6458 // 'de novo' protein folding // inferred from sequence or structural similarity /// 6626 // protein targeting to mitochondrion // inferred from sequence or structural similarity /// 9408 // response to heat // inferred from sequence or structural similarity /// 6457 // protein folding // inferred fr…	5759 // mitochondrial matrix // inferred from sequence or structural similarity /// 5759 // mitochondrial matrix // inferred from sequence similarity	IPR002423 // Chaperonin Cpn60/TCP-1 // 1.0E-126
8596	149795_at	1.33893	2.41371	10.6988	5.23e-12	2.08e-10	17.1231	FBgn0038078	CG14391	CG14391	CG14391	41567	---	---	---	---
4949	146148_at	0.99208	1.08253	10.6865	5.38e-12	2.12e-10	17.094	FBgn0032231	CG5056	CG5056	CG5056	34406	---	---	---	---
8442	149641_at	1.0322	1.0361	10.6305	6.13e-12	2.37e-10	16.9619	FBgn0037829	CG14691	CG14691	CG14691	41287	5215 // transporter activity // inferred from electronic annotation	6810 // transport // inferred from electronic annotation /// 7269 // neurotransmitter secretion // inferred from electronic annotation	8021 // synaptic vesicle // inferred from sequence or structural similarity /// 16021 // integral to membrane // inferred from electronic annotation /// 16020 // membrane // inferred from electronic annotation /// 8021 // synaptic vesicle // inferred from sequence similarity	IPR005828 // General substrate transporter // 1.9E-6
5466	146665_at	0.657329	-0.809462	10.6231	6.24e-12	2.41e-10	16.9445	FBgn0033052	CG33131	SCAP	SCAP	35529	---	42 // protein targeting to Golgi // non-traceable author statement /// 16485 // protein processing // non-traceable author statement /// 35103 // sterol regulatory element binding-protein cleavage // inferred from sequence or structural similarity /// 35103 // sterol regulatory element binding-protein cleavage // non-traceable author statement /// 35103 // sterol regulatory element binding-protei…	5795 // Golgi stack // inferred from electronic annotation /// 16021 // integral to membrane // inferred from electronic annotation	IPR001680 // G-protein beta WD-40 repeat // 1.7E-5 /// IPR001680 // G-protein beta WD-40 repeat // 0.014 /// IPR001680 // G-protein beta WD-40 repeat // 1.4E-5 /// IPR001680 // G-protein beta WD-40 repeat // 1.1E-5 /// IPR001680 // G-protein beta WD-40 repeat // 5.0E-7
10541	151740_at	0.903486	4.09657	10.6188	6.3e-12	2.42e-10	16.9342	FBgn0030086	CG7033	CG7033	CG7033	31838	3676 // nucleic acid binding // inferred from electronic annotation /// 5524 // ATP binding // inferred from electronic annotation /// 8026 // ATP-dependent helicase activity // inferred from electronic annotation /// 42623 // ATPase activity, coupled // inferred from electronic annotation /// 51082 // unfolded protein binding // inferred from electronic annotation /// 5515 // protein binding // …	6457 // protein folding // inferred from electronic annotation /// 6457 // protein folding // inferred from sequence or structural similarity /// 44267 // cellular protein metabolism // inferred from electronic annotation /// 6457 // protein folding // inferred from sequence similarity	5832 // chaperonin-containing T-complex // inferred from sequence or structural similarity /// 5832 // chaperonin-containing T-complex // inferred from sequence similarity	IPR002423 // Chaperonin Cpn60/TCP-1 // 1.0E-126 /// IPR002423 // Chaperonin Cpn60/TCP-1 // 1.0E-126
9291	150490_at	1.18688	0.774714	10.6117	6.4e-12	2.45e-10	16.9174	FBgn0029503	CG6198	CHORD	CHORD	42874	5102 // receptor binding // inferred from electronic annotation /// 8270 // zinc ion binding // inferred from sequence or structural similarity /// 5515 // protein binding // inferred from physical interaction /// 8270 // zinc ion binding // inferred from sequence similarity	6917 // induction of apoptosis // inferred from electronic annotation /// 7165 // signal transduction // inferred from electronic annotation /// 7276 // gametogenesis // inferred from electronic annotation	---	IPR007052 // CS domain // 7.9E-48 /// IPR007051 // CHORD // 4.9E-50 /// IPR007051 // CHORD // 8.4E-49
2967	144166_at	0.77945	-0.00972888	10.61	6.43e-12	2.45e-10	16.9134	FBgn0026875	CG3638	CG3638	CG3638	31071	---	---	---	IPR006990 // Tweety // 1.0E-126 /// IPR006990 // Tweety // 1.0E-126
11944	153143_at	0.705531	0.394752	10.5929	6.69e-12	2.53e-10	16.873	FBgn0030678	CG11679	CG11679	CG11679	32515	---	---	---	IPR003734 // Protein of unknown function DUF155 // 8.8E-29
11156	152355_at	0.907735	0.587663	10.574	7e-12	2.63e-10	16.8281	FBgn0015828	CG10415	TfIIE	Transcription factor IIE	39313	16251 // general RNA polymerase II transcription factor activity // inferred from sequence or structural similarity /// 5515 // protein binding // inferred from physical interaction /// 3702 // RNA polymerase II transcription factor activity // inferred from electronic annotation /// 16251 // general RNA polymerase II transcription factor activity // inferred from sequence similarity	6367 // transcription initiation from RNA polymerase II promoter // inferred from sequence or structural similarity /// 6367 // transcription initiation from RNA polymerase II promoter // inferred from electronic annotation /// 6367 // transcription initiation from RNA polymerase II promoter // inferred from sequence similarity	5673 // transcription factor TFIIE complex // inferred from sequence or structural similarity /// 5673 // transcription factor TFIIE complex // inferred from electronic annotation /// 5673 // transcription factor TFIIE complex // inferred from sequence similarity	IPR002853 // Transcription factor TFIIE, alpha subunit // 7.1E-52
11066	152265_at	1.28665	2.63127	10.5365	7.64e-12	2.85e-10	16.739	FBgn0039313	CG11892	CG11892	CG11892	43053	5515 // protein binding // inferred from physical interaction /// 16301 // kinase activity // inferred from electronic annotation /// 16740 // transferase activity // inferred from electronic annotation	---	---	IPR004119 // Protein of unknown function DUF227 // 5.1E-119
8715	149914_at	1.28195	2.43766	10.5332	7.7e-12	2.86e-10	16.7313	FBgn0038257	CG7390	smp-30	Senescence marker protein-30	41786	5509 // calcium ion binding // inferred from electronic annotation	6118 // electron transport // inferred from electronic annotation /// 7165 // signal transduction // inferred from electronic annotation /// 7242 // intracellular signaling cascade // inferred from electronic annotation /// 7275 // development // inferred from electronic annotation /// 9948 // anterior/posterior axis specification // inferred from electronic annotation /// 19722 // calcium-mediat…	---	IPR005511 // Senescence marker protein-30 (SMP-30) // 1.0E-126
11112	152311_at	1.19815	3.35362	10.526	7.83e-12	2.89e-10	16.7141	FBgn0026179	CG32434	siz	schizo	40327	5085 // guanyl-nucleotide exchange factor activity // inferred from sequence similarity /// 5085 // guanyl-nucleotide exchange factor activity // non-traceable author statement	7417 // central nervous system development // inferred from mutant phenotype /// 7520 // myoblast fusion // inferred from mutant phenotype /// 6886 // intracellular protein transport // inferred from electronic annotation /// 6887 // exocytosis // inferred from electronic annotation /// 7520 // myoblast fusion // non-traceable author statement	---	IPR000904 // SEC7-like domain // 5.4E-68 /// IPR000904 // SEC7-like domain // 5.4E-68 /// IPR000904 // SEC7-like domain // 5.4E-68
10863	152062_at	1.61652	0.755945	10.4587	9.17e-12	3.32e-10	16.5538	FBgn0035540	CG7452	Syx17	Syntaxin 17	38541	5486 // t-SNARE activity // inferred from sequence or structural similarity /// 5486 // t-SNARE activity // inferred from sequence similarity	6886 // intracellular protein transport // inferred from electronic annotation /// 7269 // neurotransmitter secretion // inferred from sequence or structural similarity /// 16081 // synaptic vesicle docking during exocytosis // inferred from sequence or structural similarity /// 16192 // vesicle-mediated transport // inferred from sequence or structural similarity /// 7269 // neurotransmitter sec…	5886 // plasma membrane // inferred from sequence or structural similarity /// 5886 // plasma membrane // inferred from sequence similarity	IPR000727 // Target SNARE coiled-coil domain // 4.8E-7
11656	152855_at	1.0215	0.705881	10.4481	9.4e-12	3.39e-10	16.5285	FBgn0010504	CG11546	l(2)02045	lethal (2) 02045	46027	5515 // protein binding // inferred from electronic annotation /// 16299 // regulator of G-protein signaling activity // inferred from sequence or structural similarity /// 5515 // protein binding // inferred from physical interaction /// 16299 // regulator of G-protein signaling activity // inferred from sequence similarity	8277 // regulation of G-protein coupled receptor protein signaling pathway // inferred from sequence or structural similarity /// 8277 // regulation of G-protein coupled receptor protein signaling pathway // inferred from sequence similarity	---	IPR001478 // PDZ/DHR/GLGF domain // 1.6E-7
8108	149307_at	0.582487	1.96166	10.4197	1.01e-11	3.6e-10	16.4608	FBgn0037292	CG2022	CG2022	CG2022	40615	5057 // receptor signaling protein activity // inferred from electronic annotation	---	5778 // peroxisomal membrane // inferred from sequence or structural similarity /// 16021 // integral to membrane // inferred from electronic annotation /// 5778 // peroxisomal membrane // inferred from sequence similarity	IPR007248 // Mpv17/PMP22 // 5.4E-46
987	142186_at	0.795036	3.55433	10.3765	1.11e-11	3.95e-10	16.3572	FBgn0028689	CG10149	Rpn6	Proteasome p44.5 subunit	36638	4175 // endopeptidase activity // inferred from direct assay /// 4175 // endopeptidase activity // inferred from sequence or structural similarity /// 5515 // protein binding // inferred from physical interaction /// 4175 // endopeptidase activity // inferred from sequence similarity	6508 // proteolysis // inferred from direct assay /// 6508 // proteolysis // inferred from sequence or structural similarity /// 6508 // proteolysis // inferred from sequence similarity	502 // proteasome complex (sensu Eukaryota) // inferred from sequence or structural similarity /// 5838 // proteasome regulatory particle (sensu Eukaryota) // inferred from direct assay /// 5838 // proteasome regulatory particle (sensu Eukaryota) // inferred from sequence or structural similarity /// 8541 // proteasome regulatory particle, lid subcomplex (sensu Eukaryota) // inferred from sequenc…	IPR000717 // Proteasome component region PCI // 8.2E-30 /// IPR000717 // Proteasome component region PCI // 8.2E-30
5559	146758_at	1.21726	1.27752	10.3516	1.18e-11	4.17e-10	16.2975	FBgn0033207	CG12826	CG12826	CG12826	35710	---	---	---	---
4379	145578_at	0.828045	3.04778	10.3453	1.2e-11	4.21e-10	16.2825	FBgn0031335	CG5565	CG5565	CG5565	33323	3824 // catalytic activity // inferred from electronic annotation	8152 // metabolism // inferred from electronic annotation	---	IPR005834 // Haloacid dehalogenase-like hydrolase // 5.3E-27
11953	153152_at	0.794116	1.74711	10.2441	1.52e-11	5.26e-10	16.0388	FBgn0039274	CG11920	CG11920	CG11920	43009	3729 // mRNA binding // inferred from electronic annotation	16072 // rRNA metabolism // inferred from electronic annotation	30532 // small nuclear ribonucleoprotein complex // inferred from sequence or structural similarity /// 30532 // small nuclear ribonucleoprotein complex // inferred from sequence similarity	IPR007109 // Brix domain // 1.6E-85
12651	153850_at	1.09753	3.64567	10.2267	1.59e-11	5.46e-10	15.9969	FBgn0038100	CG12358	Paip2	polyA-binding protein interacting protein 2	41591	5515 // protein binding // inferred from physical interaction	1558 // regulation of cell growth // inferred from mutant phenotype /// 16478 // negative regulation of translation // inferred from direct assay /// 16478 // negative regulation of translation // inferred from sequence or structural similarity /// 16478 // negative regulation of translation // inferred from sequence similarity	---	---
1499	142698_at	0.820801	0.101338	10.1704	1.82e-11	6.2e-10	15.8608	FBgn0052650	CG32650	CG32650	CG32650	326227	---	---	---	---
3739	144938_at	0.811551	0.595233	10.1678	1.83e-11	6.22e-10	15.8543	FBgn0030391	CG1900	Rab40	Rab40	32195	3924 // GTPase activity // inferred from sequence or structural similarity /// 5525 // GTP binding // inferred from electronic annotation /// 166 // nucleotide binding // inferred from electronic annotation /// 3924 // GTPase activity // inferred from sequence similarity	6886 // intracellular protein transport // inferred from electronic annotation /// 6897 // endocytosis // inferred from electronic annotation /// 7242 // intracellular signaling cascade // inferred from electronic annotation /// 7264 // small GTPase mediated signal transduction // inferred from electronic annotation /// 8360 // regulation of cell shape // inferred from mutant phenotype /// 17157 …	16020 // membrane // inferred from electronic annotation	IPR001806 // Ras GTPase superfamily // 2.7E-39 /// IPR001806 // Ras GTPase superfamily // 2.7E-39
6546	147745_at	0.729664	1.31056	10.1452	1.93e-11	6.52e-10	15.7994	FBgn0034824	CG3219	Klp59C	Klp59C	37671	3774 // motor activity // inferred from direct assay /// 3777 // microtubule motor activity // inferred from sequence or structural similarity /// 5200 // structural constituent of cytoskeleton // inferred from electronic annotation /// 5524 // ATP binding // inferred from electronic annotation /// 166 // nucleotide binding // inferred from electronic annotation /// 3774 // motor activity // infe…	70 // mitotic sister chromatid segregation // inferred from mutant phenotype /// 6605 // protein targeting // inferred from electronic annotation /// 7018 // microtubule-based movement // inferred from sequence or structural similarity /// 7018 // microtubule-based movement // inferred from electronic annotation /// 7018 // microtubule-based movement // inferred from sequence similarity	5828 // kinetochore microtubule // inferred from direct assay /// 5871 // kinesin complex // inferred from sequence or structural similarity /// 5874 // microtubule // inferred from electronic annotation /// 5875 // microtubule associated complex // inferred from electronic annotation /// 5871 // kinesin complex // inferred from sequence similarity	IPR001752 // Kinesin, motor region // 1.0E-126
12116	153315_at	0.841532	1.2854	10.083	2.24e-11	7.5e-10	15.6485	FBgn0034050	CG8297	CG8297	CG8297	36749	---	6118 // electron transport // inferred from electronic annotation	---	---
9823	151022_at	1.39883	2.04342	10.0186	2.62e-11	8.62e-10	15.4914	FBgn0053936	CG33936	CG33936	CG33936	41114	3677 // DNA binding // inferred from electronic annotation /// 8270 // zinc ion binding // inferred from electronic annotation	---	---	---
10143	151342_i_at	0.830902	-0.153971	10.0062	2.7e-11	8.79e-10	15.461	FBgn0040870	CG12454	CG12454	CG12454	50343	---	---	---	---
4777	145976_s_at	1.4538	0.682702	10.0049	2.71e-11	8.8e-10	15.4577	FBgn0031939 /// FBgn0051904	CG13796 /// CG31904	CG13796 /// CG31904	CG13796 /// CG31904	319016 /// 34051	3700 // transcription factor activity // inferred from electronic annotation /// 5328 // neurotransmitter:sodium symporter activity // inferred from electronic annotation /// 15187 // glycine transporter activity // inferred from sequence or structural similarity /// 15293 // symporter activity // inferred from electronic annotation /// 15187 // glycine transporter activity // inferred from seque…	6355 // regulation of transcription, DNA-dependent // inferred from electronic annotation /// 6520 // amino acid metabolism // inferred from electronic annotation /// 6811 // ion transport // inferred from electronic annotation /// 6836 // neurotransmitter transport // inferred from electronic annotation /// 6858 // extracellular transport // inferred from electronic annotation /// 6865 // amino …	5622 // intracellular // inferred from electronic annotation /// 5887 // integral to plasma membrane // inferred from electronic annotation /// 16020 // membrane // inferred from electronic annotation /// 16021 // integral to membrane // inferred from electronic annotation	IPR000175 // Sodium:neurotransmitter symporter // 2.0E-8
6393	147592_at	2.03063	-0.0363505	10.0025	2.72e-11	8.83e-10	15.4519	FBgn0034570	CG10543	CG10543	CG10543	37379	3676 // nucleic acid binding // inferred from electronic annotation /// 8270 // zinc ion binding // inferred from electronic annotation /// 30528 // transcription regulator activity // inferred from electronic annotation /// 46872 // metal ion binding // inferred from electronic annotation	6139 // nucleobase, nucleoside, nucleotide and nucleic acid metabolism // inferred from electronic annotation /// 6357 // regulation of transcription from RNA polymerase II promoter // inferred from electronic annotation /// 6366 // transcription from RNA polymerase II promoter // inferred from electronic annotation /// 8283 // cell proliferation // inferred from electronic annotation	5634 // nucleus // inferred from electronic annotation	IPR007087 // Zn-finger, C2H2 type // 5.8E-5 /// IPR007087 // Zn-finger, C2H2 type // 8.0E-5 /// IPR007087 // Zn-finger, C2H2 type // 5.8E-5 /// IPR007087 // Zn-finger, C2H2 type // 8.0E-5 /// IPR007087 // Zn-finger, C2H2 type // 5.8E-5 /// IPR007087 // Zn-finger, C2H2 type // 8.0E-5
13186	154385_at	0.962507	1.77255	9.9668	2.97e-11	9.53e-10	15.3645	FBgn0034590	CG30388	Magi	Magi	37403	4385 // guanylate kinase activity // inferred from sequence or structural similarity /// 4385 // guanylate kinase activity // non-traceable author statement /// 5102 // receptor binding // inferred from electronic annotation /// 5515 // protein binding // inferred from electronic annotation /// 4385 // guanylate kinase activity // inferred from sequence similarity	6605 // protein targeting // inferred from electronic annotation /// 7242 // intracellular signaling cascade // inferred from electronic annotation /// 8105 // asymmetric protein localization // inferred from electronic annotation	16020 // membrane // inferred from sequence or structural similarity /// 16020 // membrane // non-traceable author statement /// 16020 // membrane // inferred from sequence similarity	IPR001478 // PDZ/DHR/GLGF domain // 3.6E-6 /// IPR001478 // PDZ/DHR/GLGF domain // 7.5E-6 /// IPR001478 // PDZ/DHR/GLGF domain // 2.6E-10 /// IPR001478 // PDZ/DHR/GLGF domain // 1.7E-16 /// IPR001202 // WW/Rsp5/WWP domain // 1.1E-11 /// IPR001202 // WW/Rsp5/WWP domain // 3.0E-9
2204	143403_at	1.17147	2.00894	9.95605	3.05e-11	9.72e-10	15.3382	FBgn0003975	CG3830	vg	vestigial	36421	5198 // structural molecule activity // inferred from electronic annotation	7018 // microtubule-based movement // inferred from electronic annotation /// 7476 // wing morphogenesis // non-traceable author statement /// 7476 // wing morphogenesis // traceable author statement /// 8587 // wing margin morphogenesis // non-traceable author statement	5634 // nucleus // non-traceable author statement /// 5874 // microtubule // inferred from electronic annotation	---
9210	150409_at	0.697893	-0.707084	9.9516	3.08e-11	9.8e-10	15.3273	FBgn0039036	CG13835	CG13835	CG13835	42714	---	---	---	---
12339	153538_at	0.620715	2.23184	9.94336	3.14e-11	9.96e-10	15.3071	FBgn0033717	CG8839	CG8839	CG8839	36340	17064 // fatty acid amide hydrolase activity // inferred from sequence or structural similarity /// 4040 // amidase activity // inferred from electronic annotation /// 17064 // fatty acid amide hydrolase activity // inferred from sequence similarity	6807 // nitrogen compound metabolism // inferred from electronic annotation	---	IPR000120 // Amidase // 1.8E-56 /// IPR000120 // Amidase // 1.7E-15
13495	154694_at	0.83021	1.52558	9.94317	3.14e-11	9.96e-10	15.3066	FBgn0036005	CG3428	CG3428	CG3428	39104	5515 // protein binding // inferred from physical interaction	---	---	---
7239	148438_at	0.628368	0.214343	9.91966	3.33e-11	1.05e-09	15.2489	FBgn0035949	CG13314	CG13314	CG13314	39030	---	---	---	---
8745	149944_at	0.571226	0.0325767	9.89461	3.53e-11	1.11e-09	15.1873	FBgn0038310	CG4285	CG4285	CG4285	41842	---	---	---	---
4847	146046_at	1.54756	0.806982	9.88387	3.63e-11	1.13e-09	15.1609	FBgn0003209	CG12437	raw	raw	44851	---	2009 // morphogenesis of an epithelium // inferred from mutant phenotype /// 7390 // germ-band shortening // inferred from mutant phenotype /// 7391 // dorsal closure // inferred from mutant phenotype /// 7391 // dorsal closure // non-traceable author statement /// 7391 // dorsal closure // traceable author statement /// 7394 // dorsal closure, elongation of leading edge cells // traceable author…	---	---
9263	150462_at	0.833844	0.162995	9.8266	4.17e-11	1.29e-09	15.0198	FBgn0039101	CG16710	CG16710	CG16710	42790	4197 // cysteine-type endopeptidase activity // inferred from electronic annotation /// 4252 // serine-type endopeptidase activity // inferred from sequence or structural similarity /// 4263 // chymotrypsin activity // inferred from electronic annotation /// 4295 // trypsin activity // non-traceable author statement /// 4252 // serine-type endopeptidase activity // inferred from sequence similari…	6508 // proteolysis // non-traceable author statement	---	IPR001254 // Peptidase S1, chymotrypsin // 6.4E-19 /// IPR001254 // Peptidase S1, chymotrypsin // 4.3E-25
11088	152287_at	1.14575	3.12804	9.81635	4.28e-11	1.31e-09	14.9945	FBgn0026208	CG4143	mbf1	multiprotein bridging factor 1	39842	3713 // transcription coactivator activity // inferred from sequence or structural similarity /// 8327 // methyl-CpG binding // inferred from sequence or structural similarity /// 43565 // sequence-specific DNA binding // inferred from electronic annotation /// 3713 // transcription coactivator activity // inferred from sequence similarity /// 8327 // methyl-CpG binding // inferred from sequence …	6357 // regulation of transcription from RNA polymerase II promoter // inferred from electronic annotation /// 7417 // central nervous system development // inferred from genetic interaction /// 7417 // central nervous system development // inferred from mutant phenotype /// 7424 // tracheal system development (sensu Insecta) // inferred from genetic interaction /// 7424 // tracheal system develo…	5634 // nucleus // inferred from direct assay /// 5737 // cytoplasm // inferred from direct assay	IPR001387 // Helix-turn-helix motif // 1.0E-11
12516	153715_at	0.733617	2.34345	9.81655	4.27e-11	1.31e-09	14.995	FBgn0036194	CG11652	CG11652	CG11652	39317	5515 // protein binding // inferred from physical interaction	6952 // defense response // inferred from electronic annotation	---	IPR002728 // Diphthamide synthesis DPH2 protein // 1.0E-126
13620	154819_at	0.627119	-0.16138	9.81525	4.29e-11	1.31e-09	14.9917	FBgn0030187	CG2961	Ipod	Interaction partner of Dnmt2	31954	---	6306 // DNA methylation // non-traceable author statement	785 // chromatin // non-traceable author statement	---
1186	142385_at	0.665312	1.4655	9.80202	4.43e-11	1.34e-09	14.959	FBgn0034246	CG6493	Dcr-2	Dicer-2	36993	3724 // RNA helicase activity // inferred from electronic annotation /// 3725 // double-stranded RNA binding // inferred from sequence or structural similarity /// 3725 // double-stranded RNA binding // non-traceable author statement /// 4386 // helicase activity // inferred from sequence or structural similarity /// 4386 // helicase activity // non-traceable author statement /// 4520 // endodeox…	6401 // RNA catabolism // inferred from electronic annotation /// 16246 // RNA interference // inferred from direct assay /// 16246 // RNA interference // inferred from mutant phenotype /// 16246 // RNA interference // non-traceable author statement /// 16246 // RNA interference // traceable author statement /// 30422 // RNA interference, production of siRNA // inferred from direct assay /// 3042…	5622 // intracellular // inferred from electronic annotation	IPR001650 // Helicase, C-terminal // 1.0E-13 /// IPR001410 // DEAD/DEAH box helicase // 2.3E-14 /// IPR000999 // Ribonuclease III // 4.8E-18 /// IPR000999 // Ribonuclease III // 3.3E-38
4530	145729_at	0.634356	0.747239	9.78998	4.56e-11	1.37e-09	14.9293	FBgn0031559	CG3513	CG3513	CG3513	33590	4867 // serine-type endopeptidase inhibitor activity // inferred from sequence or structural similarity /// 4867 // serine-type endopeptidase inhibitor activity // inferred from electronic annotation /// 4867 // serine-type endopeptidase inhibitor activity // inferred from sequence similarity	---	---	IPR002223 // Pancreatic trypsin inhibitor (Kunitz) // 2.5E-19
4088	145287_at	0.543091	0.575493	9.71529	5.47e-11	1.62e-09	14.7442	FBgn0030905	CG15059	CG15059	CG15059	32806	---	---	---	---
10946	152145_at	1.09705	2.00908	9.70148	5.66e-11	1.67e-09	14.7099	FBgn0038921	CG6332	CG6332	CG6332	42585	---	---	---	---
12590	153789_at	1.69884	1.94864	9.67284	6.08e-11	1.77e-09	14.6387	FBgn0029882	CG3226	CG3226	CG3226	31597	---	---	---	IPR007699 // SGS // 1.8E-33
13967	AFFX-BioB-3_at	1.11432	0.918562	9.62717	6.8e-11	1.96e-09	14.5249	---	---	---	---	---	4015 // adenosylmethionine-8-amino-7-oxononanoate transaminase activity // inferred from electronic annotation /// 8483 // transaminase activity // inferred from electronic annotation /// 16740 // transferase activity // inferred from electronic annotation /// 30170 // pyridoxal phosphate binding // inferred from electronic annotation /// 3824 // catalytic activity // inferred from electronic ann…	9102 // biotin biosynthesis // inferred from electronic annotation /// 8152 // metabolism // inferred from electronic annotation /// 9058 // biosynthesis // inferred from electronic annotation /// 9236 // cobalamin biosynthesis // inferred from electronic annotation	---	---
8368	149567_at	0.614269	0.291174	9.61638	6.98e-11	2.01e-09	14.498	FBgn0037713	CG16790	CG16790	CG16790	41155	---	---	---	---
6254	147453_at	0.839824	0.843354	9.59065	7.44e-11	2.13e-09	14.4337	FBgn0034374	CG15086	CG15086	CG15086	37150	---	---	---	---
8151	149350_at	0.516039	-0.558916	9.55262	8.17e-11	2.32e-09	14.3385	FBgn0037366	CG14674	CG14674	CG14674	40703	---	---	---	---
7676	148875_at	0.790113	0.345993	9.53079	8.63e-11	2.44e-09	14.2838	FBgn0036602	CG13042	CG13042	CG13042	39798	5515 // protein binding // inferred from physical interaction	---	---	IPR007614 // Retinin-like protein // 4.8E-27
3813	145012_at	0.550875	-0.653443	9.52414	8.77e-11	2.47e-09	14.2672	FBgn0030491	CG15753	CG15753	CG15753	32306	---	---	---	---
2289	143488_at	0.572559	0.850845	9.49333	9.47e-11	2.66e-09	14.1898	FBgn0004584	CG3178	Rrp1	Recombination repair protein 1	33500	3676 // nucleic acid binding // inferred from electronic annotation /// 3906 // DNA-(apurinic or apyrimidinic site) lyase activity // inferred from sequence or structural similarity /// 4520 // endodeoxyribonuclease activity // inferred from electronic annotation /// 8311 // double-stranded DNA specific 3'-5' exodeoxyribonuclease activity // non-traceable author statement /// 287 // magnesium ion…	6281 // DNA repair // inferred from sequence or structural similarity /// 6281 // DNA repair // inferred from electronic annotation /// 6974 // response to DNA damage stimulus // inferred from electronic annotation /// 6281 // DNA repair // inferred from sequence similarity	5634 // nucleus // non-traceable author statement /// 5634 // nucleus // inferred from electronic annotation	IPR005135 // Endonuclease/exonuclease/phosphatase // 1.7E-58
4200	145399_f_at	0.598462	1.24442	9.48124	9.75e-11	2.72e-09	14.1594	FBgn0026174	CG12700	skpD	skpD	32995	3676 // nucleic acid binding // inferred from electronic annotation /// 19237 // centromeric DNA binding // inferred from electronic annotation	6508 // proteolysis // inferred from electronic annotation /// 7049 // cell cycle // inferred from electronic annotation /// 7059 // chromosome segregation // inferred from electronic annotation /// 7067 // mitosis // inferred from electronic annotation /// 19538 // protein metabolism // inferred from electronic annotation	---	IPR001232 // SKP1 component // 6.8E-32 /// IPR001232 // SKP1 component // 4.5E-23
8231	149430_at	1.45022	1.9721	9.47105	1e-10	2.79e-09	14.1338	FBgn0037484	CG1288	CG1288	CG1288	40865	---	---	---	---
1688	142887_at	0.761596	1.82469	9.43459	1.1e-10	3.02e-09	14.0421	FBgn0050038	CG30038	CG30038	CG30038	246410	---	---	5622 // intracellular // inferred from electronic annotation	---
5919	147118_at	1.49244	3.41103	9.42889	1.11e-10	3.06e-09	14.0277	FBgn0033774	CG12374	CG12374	CG12374	36410	4182 // carboxypeptidase A activity // inferred from sequence or structural similarity /// 5515 // protein binding // inferred from physical interaction /// 4180 // carboxypeptidase activity // inferred from electronic annotation /// 4182 // carboxypeptidase A activity // inferred from electronic annotation /// 4182 // carboxypeptidase A activity // inferred from sequence similarity	6508 // proteolysis // inferred from electronic annotation	---	IPR000834 // Peptidase M14, carboxypeptidase A // 4.3E-52
3832	145031_at	0.677094	1.25816	9.40302	1.18e-10	3.24e-09	13.9624	FBgn0030520	CG10990	CG10990	CG10990	32337	3676 // nucleic acid binding // inferred from electronic annotation /// 3746 // translation elongation factor activity // inferred from electronic annotation /// 8135 // translation factor activity, nucleic acid binding // inferred from electronic annotation	6412 // protein biosynthesis // inferred from electronic annotation /// 6915 // apoptosis // inferred from electronic annotation /// 6917 // induction of apoptosis // inferred from electronic annotation /// 19538 // protein metabolism // inferred from electronic annotation	---	IPR003891 // Initiation factor eIF-4 gamma, MA3 // 1.5E-42 /// IPR003891 // Initiation factor eIF-4 gamma, MA3 // 1.4E-47
2040	143239_at	1.58403	2.02925	9.39605	1.21e-10	3.29e-09	13.9448	FBgn0002565	CG6806	Lsp2	Larval serum protein 2	45326	4182 // carboxypeptidase A activity // inferred from electronic annotation /// 5344 // oxygen transporter activity // inferred from electronic annotation /// 45735 // nutrient reservoir activity // non-traceable author statement /// 5515 // protein binding // inferred from physical interaction /// 45735 // nutrient reservoir activity // inferred from electronic annotation	6508 // proteolysis // inferred from electronic annotation /// 6810 // transport // inferred from electronic annotation	5576 // extracellular region // non-traceable author statement /// 5616 // larval serum protein complex // inferred from direct assay	IPR000896 // Arthropod hemocyanin/insect LSP // 4.0E-48 /// IPR005204 // Hemocyanin, N-terminal // 1.6E-16 /// IPR005203 // Hemocyanin, C-terminal // 1.1E-74
6026	147225_at	1.18086	1.68894	9.37263	1.28e-10	3.48e-09	13.8857	FBgn0033978	CG10242	Cyp6a23	Cyp6a23	36661	4497 // monooxygenase activity // inferred from electronic annotation /// 16491 // oxidoreductase activity // inferred from electronic annotation /// 5506 // iron ion binding // inferred from electronic annotation /// 20037 // heme binding // inferred from electronic annotation /// 46872 // metal ion binding // inferred from electronic annotation	6118 // electron transport // inferred from electronic annotation /// 8202 // steroid metabolism // inferred from electronic annotation	5792 // microsome // non-traceable author statement /// 16020 // membrane // non-traceable author statement /// 16020 // membrane // inferred from electronic annotation	IPR001128 // Cytochrome P450 // 1.0E-114
6937	148136_at	0.629773	0.410578	9.36109	1.32e-10	3.56e-09	13.8565	FBgn0035481	CG12605	CG12605	CG12605	38468	3676 // nucleic acid binding // inferred from electronic annotation /// 8270 // zinc ion binding // inferred from electronic annotation /// 30528 // transcription regulator activity // inferred from electronic annotation /// 46872 // metal ion binding // inferred from electronic annotation	6139 // nucleobase, nucleoside, nucleotide and nucleic acid metabolism // inferred from electronic annotation /// 6357 // regulation of transcription from RNA polymerase II promoter // inferred from electronic annotation /// 6366 // transcription from RNA polymerase II promoter // inferred from electronic annotation /// 8283 // cell proliferation // inferred from electronic annotation	5634 // nucleus // inferred from electronic annotation	IPR002951 // Atrophin // 0.0039 /// IPR007087 // Zn-finger, C2H2 type // 4.3E-6 /// IPR007087 // Zn-finger, C2H2 type // 1.2E-5 /// IPR007087 // Zn-finger, C2H2 type // 1.5E-7 /// IPR007087 // Zn-finger, C2H2 type // 1.2E-4 /// IPR002951 // Atrophin // 0.0039 /// IPR007087 // Zn-finger, C2H2 type // 4.3E-6 /// IPR007087 // Zn-finger, C2H2 type // 1.2E-5 /// IPR007087 // Zn-finger, C2H2 type // 1.…
10111	151310_at	0.708267	0.748633	9.35719	1.33e-10	3.59e-09	13.8466	FBgn0040837	CG8620	CG8620	CG8620	50310	---	---	---	---
4444	145643_at	0.888863	3.64948	9.35048	1.35e-10	3.63e-09	13.8296	FBgn0051948	CG31948	CG31948	CG31948	326178	3824 // catalytic activity // inferred from electronic annotation	6629 // lipid metabolism // inferred from electronic annotation	---	IPR000626 // Ubiquitin // 0.015
13854	155053_at	0.72281	4.23998	9.34978	1.35e-10	3.63e-09	13.8279	FBgn0034051	CG8295	Mlf	Myelodysplasia/myeloid leukemia factor	36750	---	---	5737 // cytoplasm // inferred from direct assay /// 5737 // cytoplasm // non-traceable author statement	---
13875	155074_at	1.13484	3.11511	9.31938	1.46e-10	3.88e-09	13.7509	FBgn0038256	CG7530	CG7530	CG7530	41784	---	---	16021 // integral to membrane // inferred from electronic annotation	IPR004254 // Hly-III related proteins // 1.6E-80
20	141219_at	0.711715	0.670192	9.30977	1.5e-10	3.95e-09	13.7265	FBgn0032517	CG7099	CG7099	CG7099	34753	3677 // DNA binding // inferred from electronic annotation /// 3700 // transcription factor activity // inferred from electronic annotation /// 3712 // transcription cofactor activity // inferred from electronic annotation /// 30528 // transcription regulator activity // inferred from electronic annotation	6139 // nucleobase, nucleoside, nucleotide and nucleic acid metabolism // inferred from electronic annotation /// 6355 // regulation of transcription, DNA-dependent // inferred from electronic annotation	5634 // nucleus // inferred from electronic annotation	---
4282	145481_at	0.575392	0.764337	9.28539	1.59e-10	4.18e-09	13.6646	FBgn0031183	CG14621	CG14621	CG14621	33128	8524 // glucose 6-phosphate:phosphate antiporter activity // inferred from sequence or structural similarity /// 8524 // glucose 6-phosphate:phosphate antiporter activity // inferred from sequence similarity	5975 // carbohydrate metabolism // inferred from electronic annotation /// 8643 // carbohydrate transport // inferred from electronic annotation	---	---
12884	154083_at	1.11774	2.29915	9.28562	1.59e-10	4.18e-09	13.6652	FBgn0019890	CG8954	Smg5	Smg5	34804	---	184 // mRNA catabolism, nonsense-mediated decay // inferred from mutant phenotype	---	---
10976	152175_at	0.874125	2.02263	9.27989	1.61e-10	4.22e-09	13.6506	FBgn0036931	CG14183	CG14183	CG14183	40192	3924 // GTPase activity // inferred from electronic annotation /// 5525 // GTP binding // inferred from electronic annotation /// 5515 // protein binding // inferred from physical interaction	6955 // immune response // inferred from electronic annotation	---	IPR000048 // IQ calmodulin-binding region // 4.2E-7
6925	148124_at	0.829012	0.632652	9.26306	1.68e-10	4.39e-09	13.6079	FBgn0035462	CG1120	CG1120	CG1120	38444	5515 // protein binding // inferred from physical interaction	---	---	---
3601	144800_at	0.51804	0.165536	9.26155	1.69e-10	4.4e-09	13.604	FBgn0030202	CG12640	CG12640	CG12640	31973	5524 // ATP binding // inferred from electronic annotation	7165 // signal transduction // inferred from electronic annotation /// 7600 // sensory perception // inferred from electronic annotation	---	---
384	141583_at	1.42795	3.46289	9.25729	1.71e-10	4.43e-09	13.5932	FBgn0033980	CG10245	Cyp6a20	Cyp6a20	36664	4497 // monooxygenase activity // inferred from electronic annotation /// 16491 // oxidoreductase activity // inferred from electronic annotation /// 5506 // iron ion binding // inferred from electronic annotation /// 20037 // heme binding // inferred from electronic annotation /// 46872 // metal ion binding // inferred from electronic annotation	6118 // electron transport // inferred from electronic annotation /// 8202 // steroid metabolism // inferred from electronic annotation	5792 // microsome // non-traceable author statement /// 16020 // membrane // non-traceable author statement /// 16020 // membrane // inferred from electronic annotation	IPR001128 // Cytochrome P450 // 1.9E-107
9080	150279_at	0.472825	0.283362	9.24883	1.74e-10	4.5e-09	13.5717	FBgn0038832	CG15695	CG15695	CG15695	42468	---	---	---	IPR004245 // Protein of unknown function DUF229 // 1.0E-126
3549	144748_at	0.478359	1.61405	9.23308	1.81e-10	4.65e-09	13.5316	FBgn0052703	CG32703	CG32703	CG32703	31877	4674 // protein serine/threonine kinase activity // non-traceable author statement /// 4707 // MAP kinase activity // inferred from sequence or structural similarity /// 5524 // ATP binding // inferred from electronic annotation /// 5515 // protein binding // inferred from physical interaction /// 166 // nucleotide binding // inferred from electronic annotation /// 4672 // protein kinase activity…	165 // MAPKKK cascade // inferred from electronic annotation /// 6468 // protein amino acid phosphorylation // non-traceable author statement /// 6916 // anti-apoptosis // inferred from electronic annotation /// 8283 // cell proliferation // inferred from electronic annotation /// 6468 // protein amino acid phosphorylation // inferred from electronic annotation	---	IPR000719 // Protein kinase // 3.5E-80
13919	155118_at	0.824474	2.71808	9.22422	1.85e-10	4.75e-09	13.5091	FBgn0002044	CG10084	swm	second mitotic wave missing	48814	5515 // protein binding // inferred from physical interaction /// 166 // nucleotide binding // inferred from electronic annotation /// 3676 // nucleic acid binding // inferred from electronic annotation /// 8270 // zinc ion binding // inferred from electronic annotation	---	---	IPR000504 // RNA-binding region RNP-1 (RNA recognition motif) // 8.8E-5 /// IPR000571 // Zn-finger, C-x8-C-x5-C-x3-H type // 1.9E-4
12546	153745_at	0.774441	0.429713	9.21102	1.92e-10	4.89e-09	13.4754	FBgn0001255	CG2723	ImpE3	Ecdysone-inducible gene E3	48239	5488 // binding // inferred from electronic annotation	7561 // imaginal disc eversion // traceable author statement	5886 // plasma membrane // inferred from sequence or structural similarity /// 19898 // extrinsic to membrane // traceable author statement /// 5886 // plasma membrane // inferred from sequence similarity	---
5791	146990_at	0.81523	0.2182	9.17887	2.08e-10	5.26e-09	13.3934	FBgn0033592	CG13215	CG13215	CG13215	36182	---	---	---	---
6994	148193_at	0.891585	2.26176	9.17498	2.1e-10	5.3e-09	13.3835	FBgn0052238	CG32238	CG32238	CG32238	326203	4835 // tubulin-tyrosine ligase activity // inferred from sequence or structural similarity /// 5200 // structural constituent of cytoskeleton // inferred from electronic annotation /// 16874 // ligase activity // inferred from electronic annotation /// 4835 // tubulin-tyrosine ligase activity // inferred from sequence similarity	18166 // C-terminal protein-tyrosinylation // inferred from sequence or structural similarity /// 19538 // protein metabolism // inferred from electronic annotation /// 18166 // C-terminal protein-tyrosinylation // inferred from sequence similarity	---	IPR004344 // Tubulin-tyrosine ligase // 1.0E-126
6694	147893_at	0.511626	0.668624	9.16733	2.14e-10	5.38e-09	13.3639	FBgn0035069	CG3611	CG3611	CG3611	37972	5515 // protein binding // inferred from physical interaction	---	---	---
12656	153855_at	0.622256	1.63277	9.15788	2.19e-10	5.49e-09	13.3398	FBgn0023214	CG15085	edl	ETS-domain lacking	37149	3677 // DNA binding // inferred from electronic annotation /// 5515 // protein binding // inferred from physical interaction /// 43565 // sequence-specific DNA binding // inferred from electronic annotation	6355 // regulation of transcription, DNA-dependent // inferred from physical interaction /// 7423 // sensory organ development // inferred from mutant phenotype /// 9880 // embryonic pattern specification // inferred from mutant phenotype /// 16481 // negative regulation of transcription // inferred from genetic interaction /// 42058 // regulation of epidermal growth factor receptor signaling pat…	5634 // nucleus // inferred from electronic annotation	IPR003118 // Sterile alpha motif (SAM)/Pointed domain // 2.3E-9
2264	143463_at	1.41393	1.06014	9.14452	2.27e-10	5.65e-09	13.3056	FBgn0004414	CG14560	msopa	male-specific opa containing gene	45962	---	6952 // defense response // inferred from sequence or structural similarity /// 6952 // defense response // inferred from sequence similarity	---	---
8857	150056_at	0.882379	1.99805	9.14323	2.27e-10	5.66e-09	13.3023	FBgn0038488	CG11896	CG11896	CG11896	42076	---	---	---	IPR002110 // Ankyrin // 6.1E-5 /// IPR002110 // Ankyrin // 7.7E-5 /// IPR002110 // Ankyrin // 1.1E-4 /// IPR002110 // Ankyrin // 0.19 /// IPR002110 // Ankyrin // 2.3E-7 /// IPR002110 // Ankyrin // 1.6E-4 /// IPR002110 // Ankyrin // 0.0049
2179	143378_at	0.709789	0.405159	9.1402	2.29e-10	5.67e-09	13.2946	FBgn0003719	CG6868	tld	tolloid	42945	4222 // metalloendopeptidase activity // non-traceable author statement /// 5509 // calcium ion binding // inferred from electronic annotation /// 8270 // zinc ion binding // inferred from electronic annotation /// 8533 // astacin activity // inferred from electronic annotation /// 17026 // procollagen C-endopeptidase activity // inferred from sequence or structural similarity /// 5515 // protein…	6508 // proteolysis // non-traceable author statement /// 7352 // zygotic determination of dorsal/ventral axis // non-traceable author statement /// 7362 // terminal region determination // inferred from genetic interaction /// 7378 // amnioserosa formation // non-traceable author statement /// 8293 // torso signaling pathway // inferred from genetic interaction /// 9880 // embryonic pattern spec…	5576 // extracellular region // non-traceable author statement	IPR001506 // Peptidase M12A, astacin // 4.6E-113 /// IPR006209 // EGF-like domain // 2.1E-7 /// IPR006209 // EGF-like domain // 1.7E-9 /// IPR000859 // CUB // 1.7E-47 /// IPR000859 // CUB // 1.4E-62 /// IPR000859 // CUB // 7.7E-55 /// IPR000859 // CUB // 2.1E-56 /// IPR000859 // CUB // 1.2E-49
11684	152883_at	1.06443	2.82905	9.14072	2.29e-10	5.67e-09	13.2959	FBgn0039511	CG3330	CG3330	CG3330	43296	---	---	---	---
7602	148801_at	0.813835	1.2906	9.13009	2.35e-10	5.8e-09	13.2687	FBgn0036496	CG7804	CG7804	CG7804	39665	3729 // mRNA binding // inferred from sequence or structural similarity /// 30528 // transcription regulator activity // inferred from electronic annotation /// 166 // nucleotide binding // inferred from electronic annotation /// 3676 // nucleic acid binding // inferred from electronic annotation /// 3729 // mRNA binding // inferred from sequence similarity	398 // nuclear mRNA splicing, via spliceosome // inferred from electronic annotation /// 6357 // regulation of transcription from RNA polymerase II promoter // inferred from electronic annotation	30530 // heterogeneous nuclear ribonucleoprotein complex // inferred from sequence or structural similarity /// 30530 // heterogeneous nuclear ribonucleoprotein complex // inferred from sequence similarity	IPR000504 // RNA-binding region RNP-1 (RNA recognition motif) // 1.0E-15 /// IPR000504 // RNA-binding region RNP-1 (RNA recognition motif) // 1.2E-6
11567	152766_at	0.902462	1.32725	9.11139	2.47e-10	6.07e-09	13.2208	FBgn0002563	CG4178	Lsp1	Larval serum protein 1	33274	5344 // oxygen transporter activity // inferred from electronic annotation /// 45735 // nutrient reservoir activity // non-traceable author statement /// 45735 // nutrient reservoir activity // inferred from electronic annotation	6810 // transport // inferred from electronic annotation	5576 // extracellular region // non-traceable author statement /// 5616 // larval serum protein complex // inferred from direct assay	IPR000896 // Arthropod hemocyanin/insect LSP // 8.2E-98 /// IPR005204 // Hemocyanin, N-terminal // 8.4E-38 /// IPR005203 // Hemocyanin, C-terminal // 1.8E-109
1019	142218_at	0.555508	0.307531	9.10817	2.49e-10	6.11e-09	13.2126	FBgn0025838	CG2652	CG2652	CG2652	31250	5515 // protein binding // inferred from physical interaction	6355 // regulation of transcription, DNA-dependent // inferred from electronic annotation	5634 // nucleus // inferred from electronic annotation	---
4551	145750_at	0.635498	-0.0221871	9.10314	2.52e-10	6.17e-09	13.1997	FBgn0031592	CG3675	Art2	Arginine methyltransferase 2	33631	16274 // protein-arginine N-methyltransferase activity // inferred from sequence or structural similarity /// 5515 // protein binding // inferred from physical interaction /// 8168 // methyltransferase activity // inferred from electronic annotation /// 8757 // S-adenosylmethionine-dependent methyltransferase activity // inferred from electronic annotation /// 16740 // transferase activity // inf…	6479 // protein amino acid methylation // inferred from electronic annotation	---	---
7517	148716_at	2.52835	0.820026	9.07091	2.73e-10	6.64e-09	13.117	FBgn0052130	CG32130	CG32130	CG32130	39518	4263 // chymotrypsin activity // inferred from electronic annotation /// 4295 // trypsin activity // inferred from electronic annotation /// 5515 // protein binding // inferred from electronic annotation /// 5515 // protein binding // inferred from physical interaction /// 4252 // serine-type endopeptidase activity // inferred from electronic annotation /// 8233 // peptidase activity // inferred …	6508 // proteolysis // inferred from electronic annotation /// 6915 // apoptosis // inferred from electronic annotation	---	IPR003103 // Apoptosis regulator Bcl-2 protein, BAG // 1.4E-17
163	141362_at	0.860631	1.79372	9.06491	2.77e-10	6.7e-09	13.1016	FBgn0035852	CG7387	CG7387	CG7387	38915	51082 // unfolded protein binding // inferred from electronic annotation /// 5515 // protein binding // inferred from physical interaction /// 31072 // heat shock protein binding // inferred from electronic annotation	6457 // protein folding // inferred from electronic annotation /// 6950 // response to stress // inferred from electronic annotation /// 6952 // defense response // inferred from electronic annotation /// 19538 // protein metabolism // inferred from electronic annotation /// 6986 // response to unfolded protein // inferred from electronic annotation	---	IPR001623 // Heat shock protein DnaJ, N-terminal // 3.0E-25 /// IPR002939 // Chaperone DnaJ, C-terminal // 9.2E-27
1327	142526_at	0.632103	0.470085	9.06607	2.77e-10	6.7e-09	13.1046	FBgn0050389	CG30389	CG30389	CG30389	37410	---	---	---	---
327	141526_at	0.608254	2.69647	9.04544	2.91e-10	7e-09	13.0516	FBgn0001222	CG5748	Hsf	Heat shock factor	37068	3677 // DNA binding // inferred from direct assay /// 3677 // DNA binding // non-traceable author statement /// 3677 // DNA binding // traceable author statement /// 3700 // transcription factor activity // inferred from electronic annotation /// 3704 // specific RNA polymerase II transcription factor activity // inferred from direct assay /// 3704 // specific RNA polymerase II transcription fact…	6357 // regulation of transcription from RNA polymerase II promoter // inferred from electronic annotation /// 6952 // defense response // inferred from electronic annotation /// 9408 // response to heat // inferred from direct assay /// 9408 // response to heat // non-traceable author statement /// 9408 // response to heat // traceable author statement /// 6350 // transcription // inferred from …	5634 // nucleus // inferred from direct assay /// 5634 // nucleus // inferred from sequence or structural similarity /// 5634 // nucleus // non-traceable author statement /// 5700 // polytene chromosome // inferred from direct assay /// 5634 // nucleus // inferred from electronic annotation /// 5634 // nucleus // inferred from sequence similarity	IPR000232 // Heat shock factor (HSF)-type DNA-binding domain // 6.1E-123
7982	149181_at	0.811273	1.88822	9.03582	2.99e-10	7.16e-09	13.0268	FBgn0037086	CG7202	CG7202	CG7202	40376	---	---	---	---
9829	151028_at	0.579398	0.684673	9.02011	3.11e-10	7.4e-09	12.9864	FBgn0051477	CG31477	CG31477	CG31477	326144	8553 // hydrogen-exporting ATPase activity, phosphorylative mechanism // inferred from sequence or structural similarity /// 46933 // hydrogen-transporting ATP synthase activity, rotational mechanism // inferred from electronic annotation /// 46961 // hydrogen-transporting ATPase activity, rotational mechanism // inferred from electronic annotation /// 8553 // hydrogen-exporting ATPase activity, …	15986 // ATP synthesis coupled proton transport // inferred from electronic annotation /// 15992 // proton transport // inferred from sequence or structural similarity /// 15992 // proton transport // inferred from sequence similarity	275 // proton-transporting ATP synthase complex, catalytic core F(1) (sensu Eukaryota) // inferred from sequence or structural similarity /// 5753 // proton-transporting ATP synthase complex (sensu Eukaryota) // inferred from sequence or structural similarity /// 275 // proton-transporting ATP synthase complex, catalytic core F(1) (sensu Eukaryota) // inferred from sequence similarity /// 5753 //…	IPR006721 // Mitochondrial ATP synthase epsilon chain // 8.5E-33
12289	153488_at	0.820115	2.02514	9.01074	3.18e-10	7.56e-09	12.9623	FBgn0011224	CG31000	heph	hephaestus	48571	3729 // mRNA binding // inferred from sequence or structural similarity /// 8187 // poly-pyrimidine tract binding // inferred from sequence or structural similarity /// 8187 // poly-pyrimidine tract binding // non-traceable author statement /// 5515 // protein binding // inferred from physical interaction /// 166 // nucleotide binding // inferred from electronic annotation /// 3676 // nucleic aci…	398 // nuclear mRNA splicing, via spliceosome // inferred from sequence or structural similarity /// 7219 // Notch signaling pathway // inferred from mutant phenotype /// 7286 // spermatid development // inferred from mutant phenotype /// 8586 // wing vein morphogenesis // inferred from mutant phenotype /// 8587 // wing margin morphogenesis // inferred from mutant phenotype /// 6397 // mRNA proce…	5681 // spliceosome complex // inferred from electronic annotation /// 5634 // nucleus // inferred from electronic annotation	IPR000504 // RNA-binding region RNP-1 (RNA recognition motif) // 1.1E-6 /// IPR000504 // RNA-binding region RNP-1 (RNA recognition motif) // 7.8E-8 /// IPR000504 // RNA-binding region RNP-1 (RNA recognition motif) // 3.7E-8 /// IPR000504 // RNA-binding region RNP-1 (RNA recognition motif) // 1.1E-6 /// IPR000504 // RNA-binding region RNP-1 (RNA recognition motif) // 7.8E-8 /// IPR000504 // RNA-bi…
11825	153024_at	0.766528	4.82747	9.00663	3.22e-10	7.61e-09	12.9517	FBgn0004551	CG3725	Ca-P60A	Calcium ATPase at 60A	49297	5388 // calcium-transporting ATPase activity // inferred from sequence or structural similarity /// 5388 // calcium-transporting ATPase activity // non-traceable author statement /// 5524 // ATP binding // inferred from electronic annotation /// 16820 // hydrolase activity, acting on acid anhydrides, catalyzing transmembrane movement of substances // inferred from electronic annotation /// 166 //…	6816 // calcium ion transport // non-traceable author statement /// 6874 // calcium ion homeostasis // inferred from electronic annotation /// 7274 // neuromuscular synaptic transmission // inferred from mutant phenotype /// 8152 // metabolism // inferred from electronic annotation /// 51282 // regulation of sequestering of calcium ion // inferred from mutant phenotype /// 6810 // transport // in…	5635 // nuclear envelope // inferred from direct assay /// 5783 // endoplasmic reticulum // inferred from direct assay /// 5783 // endoplasmic reticulum // inferred from sequence or structural similarity /// 5789 // endoplasmic reticulum membrane // non-traceable author statement /// 16021 // integral to membrane // non-traceable author statement /// 16529 // sarcoplasmic reticulum // non-traceab…	IPR006068 // Cation transporting ATPase, C-terminal // 8.1E-82 /// IPR008250 // E1-E2 ATPase-associated region // 1.5E-125 /// IPR005834 // Haloacid dehalogenase-like hydrolase // 5.3E-15 /// IPR004014 // Cation transporting ATPase, N-terminal // 3.9E-32
4676	145875_at	0.57359	1.29838	9.00192	3.25e-10	7.69e-09	12.9396	FBgn0031785	CG13991	CG13991	CG13991	33868	8236 // serine-type peptidase activity // inferred from electronic annotation	6508 // proteolysis // inferred from electronic annotation	16020 // membrane // inferred from electronic annotation	---
7251	148450_at	0.7841	1.57517	8.98924	3.36e-10	7.88e-09	12.9069	FBgn0035968	CG4484	CG4484	CG4484	39055	8506 // sucrose:hydrogen symporter activity // inferred from sequence or structural similarity /// 5515 // protein binding // inferred from physical interaction /// 8506 // sucrose:hydrogen symporter activity // inferred from sequence similarity	5975 // carbohydrate metabolism // inferred from electronic annotation /// 8643 // carbohydrate transport // inferred from electronic annotation	---	---
11556	152755_at	1.11386	2.64669	8.98985	3.36e-10	7.88e-09	12.9085	FBgn0033269	CG8709	CG8709	CG8709	35790	---	6629 // lipid metabolism // inferred from electronic annotation /// 7275 // development // inferred from electronic annotation	---	IPR007651 // Lipin, N-terminal conserved region // 1.6E-74
9710	150909_at	0.436041	0.986731	8.9881	3.37e-10	7.89e-09	12.9039	FBgn0039799	CG15543	CG15543	CG15543	43647	---	---	---	---
11607	152806_at	0.771165	1.63552	8.98601	3.39e-10	7.91e-09	12.8986	FBgn0053519	CG33519	CG33519	CG33519	3346201	5524 // ATP binding // inferred from electronic annotation /// 4672 // protein kinase activity // inferred from electronic annotation	6468 // protein amino acid phosphorylation // inferred from electronic annotation	---	IPR003961 // Fibronectin, type III // 2.8E-8 /// IPR003961 // Fibronectin, type III // 9.2E-14 /// IPR000719 // Protein kinase // 1.9E-51 /// IPR000719 // Protein kinase // 9.3E-42 /// IPR007110 // Immunoglobulin-like // 3.2 /// IPR007110 // Immunoglobulin-like // 7.8E-5 /// IPR007110 // Immunoglobulin-like // 2.2E-5 /// IPR007110 // Immunoglobulin-like // 0.1 /// IPR007110 // Immunoglobulin-like…
2235	143434_at	0.902205	5.22265	8.98433	3.4e-10	7.93e-09	12.8942	FBgn0004173	CG17934	Mst84Db	Male-specific RNA 84Db	40888	5506 // iron ion binding // inferred from electronic annotation	6118 // electron transport // inferred from electronic annotation /// 7275 // development // inferred from electronic annotation /// 7283 // spermatogenesis // inferred from electronic annotation /// 30154 // cell differentiation // inferred from electronic annotation	---	IPR005634 // Male specific sperm protein // 7.3E-17
2770	143969_at	0.397705	0.428317	8.97818	3.46e-10	8.03e-09	12.8784	FBgn0023001	CG8624	melt	melted	38785	5488 // binding // inferred from electronic annotation	7398 // ectoderm development // inferred from expression pattern /// 7422 // peripheral nervous system development // inferred from mutant phenotype	---	IPR001849 // Pleckstrin-like // 1.0E-11 /// IPR001849 // Pleckstrin-like // 1.0E-11
10206	151405_at	0.509636	-0.397062	8.97561	3.48e-10	8.06e-09	12.8717	FBgn0053557	CG33557	CG33557	CG33557	3346145	3700 // transcription factor activity // inferred from sequence or structural similarity /// 3700 // transcription factor activity // inferred from sequence similarity	45449 // regulation of transcription // inferred from sequence or structural similarity /// 45449 // regulation of transcription // inferred from sequence similarity	5634 // nucleus // Unknown /// 5634 // nucleus // inferred from curator	IPR001092 // Basic helix-loop-helix dimerization domain bHLH // 1.4E-16
7589	148788_at	0.66712	0.79851	8.97048	3.53e-10	8.15e-09	12.8585	FBgn0036474	CG17871	Or71a	Odorant receptor 71a	39641	4984 // olfactory receptor activity // inferred from sequence or structural similarity /// 5549 // odorant binding // inferred from electronic annotation /// 4984 // olfactory receptor activity // inferred from sequence similarity	7186 // G-protein coupled receptor protein signaling pathway // inferred from electronic annotation /// 7267 // cell-cell signaling // inferred from electronic annotation /// 7608 // sensory perception of smell // inferred from sequence or structural similarity /// 7608 // sensory perception of smell // inferred from sequence similarity	16021 // integral to membrane // inferred from sequence or structural similarity /// 16021 // integral to membrane // inferred from sequence similarity	IPR004117 // Olfactory receptor, Drosophila // 1.6E-103
7977	149176_at	1.09576	2.41225	8.96548	3.57e-10	8.23e-09	12.8456	FBgn0052436	CG32436	CG32436	CG32436	40362	---	---	---	---
1010	142209_at	1.06655	1.89031	8.95272	3.69e-10	8.47e-09	12.8126	---	CG11714 /// CG6128	---	---	---	4560 // alpha-L-fucosidase activity // inferred from sequence or structural similarity /// 5515 // protein binding // inferred from physical interaction /// 4560 // alpha-L-fucosidase activity // inferred from electronic annotation /// 16787 // hydrolase activity // inferred from electronic annotation /// 16798 // hydrolase activity, acting on glycosyl bonds // inferred from electronic annotation…	6004 // fucose metabolism // inferred from sequence or structural similarity /// 16142 // O-glycoside catabolism // inferred from sequence or structural similarity /// 5975 // carbohydrate metabolism // inferred from electronic annotation /// 6027 // glycosaminoglycan catabolism // non-traceable author statement	---	---
6769	147968_at	0.935608	1.58302	8.94544	3.76e-10	8.62e-09	12.7939	FBgn0035207	CG9153	CG9153	CG9153	38151	4842 // ubiquitin-protein ligase activity // inferred from sequence or structural similarity /// 5085 // guanyl-nucleotide exchange factor activity // inferred from electronic annotation /// 4842 // ubiquitin-protein ligase activity // inferred from electronic annotation /// 4842 // ubiquitin-protein ligase activity // inferred from sequence similarity	6464 // protein modification // inferred from electronic annotation /// 6508 // proteolysis // inferred from electronic annotation /// 6512 // ubiquitin cycle // inferred from electronic annotation	5622 // intracellular // inferred from electronic annotation	IPR000408 // Regulator of chromosome condensation, RCC1 // 1.3E-7 /// IPR000408 // Regulator of chromosome condensation, RCC1 // 6.7E-8 /// IPR000408 // Regulator of chromosome condensation, RCC1 // 1.1E-8 /// IPR000408 // Regulator of chromosome condensation, RCC1 // 4.2E-6 /// IPR000569 // HECT domain (Ubiquitin-protein ligase) // 2.0E-72
7200	148399_at	0.497223	-0.549599	8.94237	3.79e-10	8.67e-09	12.7859	FBgn0001253	CG32356	ImpE1	Ecdysone-inducible gene E1	45879	8034 // lipoprotein binding // inferred from sequence or structural similarity /// 8034 // lipoprotein binding // inferred from sequence similarity	7561 // imaginal disc eversion // traceable author statement	19898 // extrinsic to membrane // traceable author statement	IPR006149 // Nematode-specific EB region // 1.7E-23 /// IPR002172 // Low density lipoprotein-receptor, class A // 2.7E-11 /// IPR002172 // Low density lipoprotein-receptor, class A // 1.4E-6 /// IPR002172 // Low density lipoprotein-receptor, class A // 2.3E-11
66	141265_at	0.972388	1.65264	8.91601	4.05e-10	9.19e-09	12.7178	FBgn0040475	CG6757	SH3PX1	SH3PX1	39136	5515 // protein binding // inferred from physical interaction /// 5515 // protein binding // inferred from electronic annotation /// 35091 // phosphoinositide binding // inferred from electronic annotation	6886 // intracellular protein transport // inferred from sequence or structural similarity /// 7242 // intracellular signaling cascade // inferred from electronic annotation /// 6886 // intracellular protein transport // inferred from sequence similarity	---	IPR001452 // SH3 // 7.0E-17 /// IPR001683 // Phox-like // 3.9E-37
11303	152502_at	0.676335	1.67698	8.91651	4.05e-10	9.19e-09	12.7191	FBgn0032424	CG17010	CG17010	CG17010	34650	4747 // ribokinase activity // inferred from sequence or structural similarity /// 19201 // nucleotide kinase activity // inferred from electronic annotation /// 5515 // protein binding // inferred from physical interaction /// 4747 // ribokinase activity // inferred from electronic annotation /// 3723 // RNA binding // inferred from electronic annotation /// 3743 // translation initiation factor…	5975 // carbohydrate metabolism // inferred from electronic annotation /// 6014 // D-ribose metabolism // inferred from electronic annotation /// 6413 // translational initiation // inferred from electronic annotation	5737 // cytoplasm // inferred from electronic annotation	IPR002173 // Carbohydrate kinase, PfkB // 3.8E-54
8111	149310_at	0.533367	-0.148197	8.90828	4.13e-10	9.35e-09	12.6978	FBgn0037296	CG12161	CG12161	CG12161	40621	4175 // endopeptidase activity // inferred from sequence or structural similarity /// 5515 // protein binding // inferred from physical interaction /// 4175 // endopeptidase activity // inferred from electronic annotation /// 4298 // threonine endopeptidase activity // inferred from electronic annotation /// 8233 // peptidase activity // inferred from electronic annotation /// 16787 // hydrolase …	6508 // proteolysis // inferred from electronic annotation /// 6511 // ubiquitin-dependent protein catabolism // inferred from electronic annotation	5839 // proteasome core complex (sensu Eukaryota) // inferred from sequence or structural similarity /// 5829 // cytosol // inferred from electronic annotation /// 5839 // proteasome core complex (sensu Eukaryota) // inferred from electronic annotation /// 43234 // protein complex // inferred from electronic annotation /// 5839 // proteasome core complex (sensu Eukaryota) // inferred from sequenc…	IPR001353 // Peptidase T1, 20S proteasome // 1.9E-55
6698	147897_at	0.592611	0.0783634	8.8995	4.23e-10	9.51e-09	12.675	FBgn0035078	CG2857	CG2857	CG2857	37983	5386 // carrier activity // inferred from sequence or structural similarity /// 5488 // binding // inferred from electronic annotation /// 17077 // oxidative phosphorylation uncoupler activity // inferred from sequence or structural similarity /// 5215 // transporter activity // inferred from electronic annotation /// 5386 // carrier activity // inferred from sequence similarity /// 17077 // oxid…	6812 // cation transport // inferred from electronic annotation /// 6810 // transport // inferred from electronic annotation	5740 // mitochondrial envelope // inferred from sequence or structural similarity /// 5743 // mitochondrial inner membrane // inferred from sequence or structural similarity /// 5743 // mitochondrial inner membrane // inferred from electronic annotation /// 16020 // membrane // inferred from electronic annotation /// 16021 // integral to membrane // inferred from electronic annotation /// 5740 //…	IPR001993 // Mitochondrial substrate carrier // 1.2E-27 /// IPR001993 // Mitochondrial substrate carrier // 2.0E-21 /// IPR001993 // Mitochondrial substrate carrier // 3.2E-26
3677	144876_at	0.522277	0.23807	8.85419	4.75e-10	1.06e-08	12.5576	FBgn0030300	CG1747	Sk1	Sphingosine kinase 1	32089	4143 // diacylglycerol kinase activity // non-traceable author statement /// 17050 // D-erythro-sphingosine kinase activity // inferred from direct assay /// 17050 // D-erythro-sphingosine kinase activity // inferred from sequence or structural similarity /// 17050 // D-erythro-sphingosine kinase activity // traceable author statement /// 19200 // carbohydrate kinase activity // inferred from ele…	6665 // sphingolipid metabolism // inferred from direct assay /// 6670 // sphingosine metabolism // inferred from sequence or structural similarity /// 6916 // anti-apoptosis // inferred from electronic annotation /// 7165 // signal transduction // inferred from electronic annotation /// 7205 // protein kinase C activation // inferred from electronic annotation /// 16310 // phosphorylation // inf…	---	IPR001206 // Diacylglycerol kinase, catalytic domain // 9.2E-16
12413	153612_at	0.600135	1.67418	8.8231	5.14e-10	1.14e-08	12.4768	FBgn0036240	CG6928	CG6928	CG6928	39367	5215 // transporter activity // non-traceable author statement /// 15381 // high affinity sulfate permease activity // inferred from sequence or structural similarity /// 5215 // transporter activity // inferred from electronic annotation /// 15381 // high affinity sulfate permease activity // inferred from sequence similarity	6790 // sulfur metabolism // inferred from electronic annotation /// 6820 // anion transport // inferred from electronic annotation /// 6858 // extracellular transport // inferred from electronic annotation /// 6810 // transport // inferred from electronic annotation	16021 // integral to membrane // inferred from electronic annotation	IPR001902 // Sulphate transporter // 1.4E-17 /// IPR001902 // Sulphate transporter // 1.8E-39
10584	151783_at	0.523535	1.01759	8.82223	5.15e-10	1.14e-08	12.4746	FBgn0035575	CG7509	CG7509	CG7509	38579	---	7155 // cell adhesion // inferred from electronic annotation /// 19226 // transmission of nerve impulse // inferred from electronic annotation	---	IPR001611 // Leucine-rich repeat // 0.013 /// IPR001611 // Leucine-rich repeat // 0.053 /// IPR001611 // Leucine-rich repeat // 0.0087 /// IPR001611 // Leucine-rich repeat // 0.0021 /// IPR001611 // Leucine-rich repeat // 0.5 /// IPR001611 // Leucine-rich repeat // 0.0014 /// IPR001611 // Leucine-rich repeat // 0.0089 /// IPR001611 // Leucine-rich repeat // 0.0019 /// IPR001611 // Leucine-rich re…
3784	144983_at	0.60357	0.135307	8.82147	5.16e-10	1.14e-08	12.4726	FBgn0010303	CG4353	hep	hemipterous	32256	4672 // protein kinase activity // inferred from direct assay /// 4702 // receptor signaling protein serine/threonine kinase activity // non-traceable author statement /// 4708 // MAP kinase kinase activity // inferred from sequence or structural similarity /// 4708 // MAP kinase kinase activity // non-traceable author statement /// 4708 // MAP kinase kinase activity // traceable author statement…	165 // MAPKKK cascade // non-traceable author statement /// 1736 // establishment of planar polarity // non-traceable author statement /// 6357 // regulation of transcription from RNA polymerase II promoter // non-traceable author statement /// 6468 // protein amino acid phosphorylation // non-traceable author statement /// 6468 // protein amino acid phosphorylation // traceable author statement …	---	IPR000719 // Protein kinase // 2.0E-61
4725	145924_at	0.547679	0.674523	8.82039	5.18e-10	1.14e-08	12.4698	FBgn0031856	CG11322	CG11322	CG11322	33949	---	---	---	---
2307	143506_at	0.575871	-3.82e-05	8.76948	5.9e-10	1.28e-08	12.3373	FBgn0004656	CG2252	fs(1)h	female sterile (1) homoeotic	31722	3677 // DNA binding // non-traceable author statement /// 3682 // chromatin binding // inferred from electronic annotation /// 3697 // single-stranded DNA binding // inferred from electronic annotation /// 4672 // protein kinase activity // non-traceable author statement	165 // MAPKKK cascade // inferred from electronic annotation /// 6333 // chromatin assembly or disassembly // inferred from electronic annotation /// 6357 // regulation of transcription from RNA polymerase II promoter // non-traceable author statement /// 7283 // spermatogenesis // inferred from electronic annotation /// 7275 // development // inferred from electronic annotation	16020 // membrane // inferred from electronic annotation /// 16021 // integral to membrane // inferred from electronic annotation	IPR001487 // Bromodomain // 6.5E-45 /// IPR001487 // Bromodomain // 5.7E-40
11378	152577_at	0.95481	2.87729	8.75034	6.2e-10	1.34e-08	12.2874	FBgn0029161	CG9131	slmo	slowmo	44132	3700 // transcription factor activity // inferred from electronic annotation /// 5515 // protein binding // inferred from physical interaction	6355 // regulation of transcription, DNA-dependent // inferred from electronic annotation /// 7283 // spermatogenesis // inferred from mutant phenotype /// 8345 // larval locomotory behavior // inferred from mutant phenotype /// 30432 // peristalsis // inferred from mutant phenotype /// 30537 // larval behavior // inferred from mutant phenotype	5739 // mitochondrion // inferred from direct assay /// 5739 // mitochondrion // inferred from mutant phenotype /// 5739 // mitochondrion // inferred from electronic annotation	IPR006797 // MSF1 // 2.7E-83
9539	150738_at	0.546986	0.315065	8.74608	6.27e-10	1.35e-08	12.2762	FBgn0039527	CG5639	CG5639	CG5639	43314	4867 // serine-type endopeptidase inhibitor activity // inferred from electronic annotation	---	---	IPR004094 // Antistasin // 1.5E-6 /// IPR004094 // Antistasin // 4.0E-13 /// IPR004094 // Antistasin // 8.8E-7 /// IPR004094 // Antistasin // 2.6E-10 /// IPR000716 // Thyroglobulin type-1 // 3.7E-11 /// IPR000716 // Thyroglobulin type-1 // 9.3E-8 /// IPR000716 // Thyroglobulin type-1 // 1.2E-7 /// IPR000716 // Thyroglobulin type-1 // 2.7E-7 /// IPR008197 // Whey acidic protein, core region // 1.4…
12833	154032_at	0.705897	0.852699	8.72948	6.54e-10	1.4e-08	12.2329	FBgn0003392 /// FBgn0068585	CG18102	shi /// Dsimshi	shibire /// shi	45928	3777 // microtubule motor activity // non-traceable author statement /// 3779 // actin binding // inferred from direct assay /// 3924 // GTPase activity // inferred from electronic annotation /// 3924 // GTPase activity // inferred from sequence or structural similarity /// 3924 // GTPase activity // non-traceable author statement /// 5200 // structural constituent of cytoskeleton // inferred fro…	910 // cytokinesis // inferred from mutant phenotype /// 910 // cytokinesis // traceable author statement /// 6886 // intracellular protein transport // inferred from electronic annotation /// 6897 // endocytosis // non-traceable author statement /// 6897 // endocytosis // traceable author statement /// 6898 // receptor mediated endocytosis // non-traceable author statement /// 6952 // defense re…	5875 // microtubule associated complex // inferred from sequence or structural similarity /// 5886 // plasma membrane // inferred from direct assay /// 45202 // synapse // inferred from mutant phenotype /// 5874 // microtubule // inferred from electronic annotation /// 5875 // microtubule associated complex // inferred from sequence similarity	IPR003130 // Dynamin GTPase effector // 1.9E-42 /// IPR000375 // Dynamin central region // 1.0E-126 /// IPR001401 // Dynamin // 1.0E-126 /// IPR001849 // Pleckstrin-like // 1.1E-16
7940	149139_at	1.07657	1.51061	8.70993	6.88e-10	1.46e-08	12.1818	FBgn0037012	CG4786	CG4786	CG4786	40283	5515 // protein binding // inferred from physical interaction	---	---	---
10094	151293_f_at	1.05309	1.71541	8.7084	6.91e-10	1.46e-08	12.1779	FBgn0053271	CG33271	CG33271	CG33271	2768972	---	---	---	---
6665	147864_at	0.742299	1.83471	8.70543	6.96e-10	1.47e-08	12.1701	FBgn0035014	CG13581	CG13581	CG13581	37911	5515 // protein binding // inferred from physical interaction	---	---	---
8734	149933_at	1.6021	1.50896	8.70543	6.96e-10	1.47e-08	12.1701	FBgn0038286	CG6966	CG6966	CG6966	41816	5102 // receptor binding // inferred from electronic annotation	8283 // cell proliferation // inferred from electronic annotation	---	IPR002110 // Ankyrin // 3.1E-6 /// IPR002110 // Ankyrin // 1.2E-6 /// IPR002110 // Ankyrin // 7.5E-6 /// IPR002110 // Ankyrin // 6.3E-8 /// IPR002110 // Ankyrin // 6.3E-6 /// IPR002110 // Ankyrin // 0.0095 /// IPR002110 // Ankyrin // 5.7E-6 /// IPR002110 // Ankyrin // 0.028
106	141305_at	0.852311	1.29654	8.69735	7.11e-10	1.5e-08	12.149	FBgn0038466	CG8907	CG8907	CG8907	42050	5515 // protein binding // inferred from physical interaction	7275 // development // inferred from electronic annotation	---	IPR001452 // SH3 // 4.5E-8
12107	153306_at	1.07637	4.50521	8.69598	7.13e-10	1.5e-08	12.1454	FBgn0038145	CG8863	CG8863	CG8863	41646	51082 // unfolded protein binding // inferred from electronic annotation /// 31072 // heat shock protein binding // inferred from electronic annotation	6457 // protein folding // inferred from electronic annotation /// 6950 // response to stress // inferred from electronic annotation /// 6952 // defense response // inferred from electronic annotation /// 6986 // response to unfolded protein // inferred from electronic annotation	---	IPR002939 // Chaperone DnaJ, C-terminal // 5.6E-7 /// IPR001623 // Heat shock protein DnaJ, N-terminal // 8.2E-37 /// IPR001305 // DnaJ central domain (CXXCXGXG) // 4.7E-32
2558	143757_at	0.707036	0.359514	8.68699	7.3e-10	1.53e-08	12.1218	FBgn0014388	CG1921	sty	sprouty	38424	5102 // receptor binding // inferred from electronic annotation /// 5515 // protein binding // inferred from physical interaction	165 // MAPKKK cascade // inferred from electronic annotation /// 1763 // morphogenesis of a branching structure // traceable author statement /// 7169 // transmembrane receptor protein tyrosine kinase signaling pathway // traceable author statement /// 7173 // epidermal growth factor receptor signaling pathway // non-traceable author statement /// 7424 // tracheal system development (sensu Insect…	5622 // intracellular // non-traceable author statement /// 5622 // intracellular // traceable author statement /// 5886 // plasma membrane // non-traceable author statement /// 16020 // membrane // inferred from electronic annotation	IPR007875 // Sprouty // 1.0E-126
11663	152862_at	0.733107	2.26865	8.68274	7.38e-10	1.54e-08	12.1107	FBgn0039223	CG5805	CG5805	CG5805	42950	5386 // carrier activity // inferred from sequence or structural similarity /// 5488 // binding // inferred from electronic annotation /// 5215 // transporter activity // inferred from electronic annotation /// 5386 // carrier activity // inferred from sequence similarity	6810 // transport // inferred from electronic annotation	5740 // mitochondrial envelope // inferred from sequence or structural similarity /// 5743 // mitochondrial inner membrane // inferred from electronic annotation /// 16020 // membrane // inferred from electronic annotation /// 16021 // integral to membrane // inferred from electronic annotation /// 5740 // mitochondrial envelope // inferred from sequence similarity	IPR001993 // Mitochondrial substrate carrier // 1.3E-20 /// IPR001993 // Mitochondrial substrate carrier // 1.5E-14 /// IPR001993 // Mitochondrial substrate carrier // 1.4E-16
6335	147534_at	0.599661	0.819428	8.6761	7.51e-10	1.56e-08	12.0933	FBgn0034493	CG8908	CG8908	CG8908	37293	166 // nucleotide binding // inferred from electronic annotation /// 5215 // transporter activity // inferred from sequence or structural similarity /// 5524 // ATP binding // inferred from electronic annotation /// 42626 // ATPase activity, coupled to transmembrane movement of substances // inferred from sequence or structural similarity /// 5215 // transporter activity // inferred from sequence…	6810 // transport // inferred from sequence or structural similarity /// 6810 // transport // inferred from sequence similarity	43190 // ATP-binding cassette (ABC) transporter complex // inferred from sequence or structural similarity /// 43190 // ATP-binding cassette (ABC) transporter complex // inferred from sequence similarity	IPR003439 // ABC transporter // 5.4E-36 /// IPR003439 // ABC transporter // 1.2E-33 /// IPR003439 // ABC transporter // 5.4E-36 /// IPR003439 // ABC transporter // 1.2E-33
13493	154692_at	1.24463	3.16896	8.6683	7.66e-10	1.59e-08	12.0729	FBgn0053503	---	Cyp12d1-d	Cyp12d1-d	2768720	4497 // monooxygenase activity // inferred from electronic annotation /// 16491 // oxidoreductase activity // inferred from electronic annotation /// 4497 // monooxygenase activity // inferred from sequence or structural similarity /// 16491 // oxidoreductase activity // inferred from sequence or structural similarity /// 19825 // oxygen binding // inferred from sequence or structural similarity …	6118 // electron transport // inferred from electronic annotation /// 6118 // electron transport // inferred from sequence or structural similarity	5739 // mitochondrion // inferred from sequence or structural similarity /// 5739 // mitochondrion // inferred from electronic annotation /// 16020 // membrane // inferred from electronic annotation /// 5739 // mitochondrion // inferred from sequence similarity	IPR001128 // Cytochrome P450 // 1.1E-59
6643	147842_at	0.407	1.08122	8.65161	8e-10	1.65e-08	12.0292	FBgn0015544	CG13570	spag	spaghetti	43958	4722 // protein serine/threonine phosphatase activity // inferred from sequence or structural similarity /// 51087 // chaperone binding // inferred from physical interaction /// 5515 // protein binding // inferred from physical interaction /// 5488 // binding // inferred from electronic annotation /// 4722 // protein serine/threonine phosphatase activity // inferred from sequence similarity	7444 // imaginal disc development // inferred from mutant phenotype /// 7446 // imaginal disc growth // inferred from mutant phenotype /// 8283 // cell proliferation // inferred from mutant phenotype /// 46529 // imaginal disc fusion, thorax closure // inferred from mutant phenotype	---	IPR001440 // TPR repeat // 1.0E-7 /// IPR001440 // TPR repeat // 2.2E-6 /// IPR001440 // TPR repeat // 1.1E-4
4299	145498_at	0.711888	0.494555	8.62911	8.48e-10	1.74e-08	11.9702	FBgn0069968	---	CG40500	CG40500	---	---	---	---	IPR001611 // Leucine-rich repeat // 0.25 /// IPR001611 // Leucine-rich repeat // 0.12 /// IPR001611 // Leucine-rich repeat // 4.0E-4 /// IPR001611 // Leucine-rich repeat // 0.11 /// IPR001611 // Leucine-rich repeat // 0.53 /// IPR001611 // Leucine-rich repeat // 0.0010 /// IPR001611 // Leucine-rich repeat // 0.0049 /// IPR001611 // Leucine-rich repeat // 0.053 /// IPR001611 // Leucine-rich repeat…
1227	142426_at	0.477817	0.69871	8.62433	8.59e-10	1.75e-08	11.9576	FBgn0031850	CG11326	Tsp	Thrombospondin	33941	5198 // structural molecule activity // inferred from electronic annotation /// 5509 // calcium ion binding // inferred from electronic annotation /// 5515 // protein binding // inferred from physical interaction	7155 // cell adhesion // inferred from electronic annotation /// 7155 // cell adhesion // inferred from sequence or structural similarity /// 7155 // cell adhesion // inferred from sequence similarity	5578 // extracellular matrix (sensu Metazoa) // inferred from sequence or structural similarity /// 16020 // membrane // inferred from electronic annotation /// 5576 // extracellular region // inferred from electronic annotation /// 5578 // extracellular matrix (sensu Metazoa) // inferred from sequence similarity	IPR006209 // EGF-like domain // 3.8E-5 /// IPR003367 // Thrombospondin type 3 repeat // 13.0 /// IPR003367 // Thrombospondin type 3 repeat // 0.045 /// IPR003367 // Thrombospondin type 3 repeat // 0.71 /// IPR003367 // Thrombospondin type 3 repeat // 0.0021 /// IPR003367 // Thrombospondin type 3 repeat // 0.0026 /// IPR003367 // Thrombospondin type 3 repeat // 0.12 /// IPR003367 // Thrombospondin…
7884	149083_at	0.668599	1.80224	8.59891	9.18e-10	1.85e-08	11.8909	FBgn0036925	CG17736	schuy	schumacher-levy	40184	---	---	---	---
6341	147540_at	0.695403	1.74791	8.5729	9.82e-10	1.96e-08	11.8225	FBgn0034505	CG16739	CG16739	CG16739	37307	---	---	---	---
2736	143935_s_at	0.640213	0.339164	8.57002	9.89e-10	1.97e-08	11.8149	FBgn0020637 /// FBgn0042120 /// FBgn0020638	CG18779 /// CG10534 /// CG10530	Lcp65Ag2 /// CG18779 /// Lcp65Ag1	Lcp65Ag2 /// CG18779 /// Lcp65Ag1	38702 /// 38703 /// 59159	8010 // structural constituent of larval cuticle (sensu Insecta) // inferred from sequence or structural similarity /// 8010 // structural constituent of larval cuticle (sensu Insecta) // non-traceable author statement /// 5515 // protein binding // inferred from physical interaction /// 5198 // structural molecule activity // inferred from electronic annotation /// 42302 // structural constituen…	8363 // larval cuticle biosynthesis (sensu Insecta) // non-traceable author statement	5576 // extracellular region // non-traceable author statement	IPR000618 // Insect cuticle protein // 4.4E-31 /// IPR000618 // Insect cuticle protein // 2.3E-31
13680	154879_at	0.54098	0.927499	8.54215	1.06e-09	2.1e-08	11.7415	FBgn0038381	CG3303	CG3303	CG3303	41931	4252 // serine-type endopeptidase activity // inferred from sequence or structural similarity /// 5515 // protein binding // inferred from physical interaction /// 4252 // serine-type endopeptidase activity // inferred from sequence similarity	---	---	---
13483	154682_at	0.721639	1.6285	8.54031	1.07e-09	2.11e-08	11.7367	FBgn0052179	CG32179	Krn	Keren	326198	5154 // epidermal growth factor receptor binding // inferred from sequence or structural similarity /// 8083 // growth factor activity // inferred from sequence or structural similarity /// 5154 // epidermal growth factor receptor binding // inferred from sequence similarity /// 8083 // growth factor activity // inferred from sequence similarity	165 // MAPKKK cascade // inferred from direct assay /// 7173 // epidermal growth factor receptor signaling pathway // non-traceable author statement /// 16318 // ommatidial rotation // inferred from mutant phenotype /// 45741 // positive regulation of epidermal growth factor receptor activity // inferred from genetic interaction /// 45741 // positive regulation of epidermal growth factor receptor…	5886 // plasma membrane // inferred from sequence or structural similarity /// 16020 // membrane // inferred from electronic annotation /// 16021 // integral to membrane // inferred from electronic annotation /// 5886 // plasma membrane // inferred from sequence similarity	IPR006209 // EGF-like domain // 2.9E-7
6790	147989_at	0.839898	0.893698	8.53932	1.07e-09	2.11e-08	11.7341	---	CG18170 /// CG33791	---	---	---	4591 // oxoglutarate dehydrogenase (succinyl-transferring) activity // inferred from sequence or structural similarity /// 4591 // oxoglutarate dehydrogenase (succinyl-transferring) activity // inferred from electronic annotation /// 30976 // thiamin pyrophosphate binding // inferred from electronic annotation /// 16624 // oxidoreductase activity, acting on the aldehyde or oxo group of donors, di…	6099 // tricarboxylic acid cycle // inferred from sequence or structural similarity /// 6096 // glycolysis // inferred from electronic annotation /// 8152 // metabolism // inferred from electronic annotation	9353 // oxoglutarate dehydrogenase complex (sensu Eukaryota) // inferred from sequence or structural similarity	---
376	141575_at	1.36356	1.81704	8.51814	1.13e-09	2.22e-08	11.6782	FBgn0020647	CG5405	KrT95D	Krueppel target at 95D	42843	---	42 // protein targeting to Golgi // inferred from sequence or structural similarity /// 42 // protein targeting to Golgi // inferred from sequence similarity	---	---
11564	152763_at	0.422201	0.595949	8.49743	1.2e-09	2.33e-08	11.6236	FBgn0037512	CG2616	CG2616	CG2616	40915	5386 // carrier activity // inferred from sequence or structural similarity /// 5488 // binding // inferred from electronic annotation /// 5386 // carrier activity // inferred from sequence similarity	6810 // transport // inferred from electronic annotation	5739 // mitochondrion // inferred from sequence or structural similarity /// 5740 // mitochondrial envelope // inferred from sequence or structural similarity /// 16020 // membrane // inferred from electronic annotation /// 16021 // integral to membrane // inferred from electronic annotation /// 5739 // mitochondrion // inferred from sequence similarity /// 5740 // mitochondrial envelope // infer…	IPR001993 // Mitochondrial substrate carrier // 2.0E-27 /// IPR001993 // Mitochondrial substrate carrier // 5.7E-27 /// IPR001993 // Mitochondrial substrate carrier // 7.5E-26
7348	148547_at	0.864636	0.540259	8.49506	1.2e-09	2.34e-08	11.6173	FBgn0036122	CG33048	Mocs1	Mocs1	39238	3824 // catalytic activity // inferred from electronic annotation /// 5506 // iron ion binding // inferred from electronic annotation	6777 // Mo-molybdopterin cofactor biosynthesis // inferred from sequence or structural similarity /// 6777 // Mo-molybdopterin cofactor biosynthesis // non-traceable author statement /// 6777 // Mo-molybdopterin cofactor biosynthesis // inferred from electronic annotation /// 6777 // Mo-molybdopterin cofactor biosynthesis // inferred from sequence similarity	19008 // molybdopterin synthase complex // inferred from electronic annotation	IPR002820 // Molybdopterin cofactor biosynthesis protein MoaC // 7.4E-83 /// IPR010505 // Molybdenum cofactor synthesis C // 1.4E-47 /// IPR007197 // Radical SAM // 2.2E-41 /// IPR010505 // Molybdenum cofactor synthesis C // 5.1E-48 /// IPR002820 // Molybdopterin cofactor biosynthesis protein MoaC // 7.4E-83
6049	147248_at	0.467023	0.323732	8.48982	1.22e-09	2.37e-08	11.6035	FBgn0034018	CG12958	CG12958	CG12958	36710	---	---	---	---
8038	149237_at	0.472065	0.507278	8.48789	1.23e-09	2.38e-08	11.5984	FBgn0037170	CG11401	Trxr-2	thioredoxin reductase 2	40475	4791 // thioredoxin-disulfide reductase activity // inferred from direct assay /// 4791 // thioredoxin-disulfide reductase activity // inferred from sequence or structural similarity /// 15036 // disulfide oxidoreductase activity // inferred from electronic annotation /// 16209 // antioxidant activity // inferred from sequence or structural similarity /// 16209 // antioxidant activity // non-trac…	6125 // thioredoxin pathway // inferred from sequence or structural similarity /// 6790 // sulfur metabolism // inferred from electronic annotation /// 6118 // electron transport // inferred from electronic annotation /// 6125 // thioredoxin pathway // inferred from sequence similarity	5737 // cytoplasm // inferred from sequence or structural similarity /// 5739 // mitochondrion // inferred from sequence or structural similarity /// 5737 // cytoplasm // inferred from electronic annotation /// 5739 // mitochondrion // inferred from electronic annotation /// 5737 // cytoplasm // inferred from sequence similarity /// 5739 // mitochondrion // inferred from sequence similarity	IPR004099 // Pyridine nucleotide-disulphide oxidoreductase dimerisation domain // 8.1E-41 /// IPR001327 // FAD-dependent pyridine nucleotide-disulphide oxidoreductase // 2.5E-77
1459	142658_at	0.432585	0.11273	8.48724	1.23e-09	2.38e-08	11.5966	FBgn0010575	CG5580	sbb	scribbler	44027	3700 // transcription factor activity // non-traceable author statement /// 8270 // zinc ion binding // inferred from electronic annotation /// 3676 // nucleic acid binding // inferred from electronic annotation /// 46872 // metal ion binding // inferred from electronic annotation	122 // negative regulation of transcription from RNA polymerase II promoter // non-traceable author statement /// 7411 // axon guidance // inferred from mutant phenotype /// 7411 // axon guidance // non-traceable author statement /// 7412 // axon target recognition // inferred from mutant phenotype /// 8345 // larval locomotory behavior // inferred from mutant phenotype /// 8345 // larval locomot…	5634 // nucleus // inferred from direct assay /// 5634 // nucleus // non-traceable author statement /// 5634 // nucleus // inferred from electronic annotation	---
13971	AFFX-BioC-5_at	1.30207	1.41032	8.48105	1.25e-09	2.41e-08	11.5803	---	---	---	---	---	4015 // adenosylmethionine-8-amino-7-oxononanoate transaminase activity // inferred from electronic annotation /// 8483 // transaminase activity // inferred from electronic annotation /// 16740 // transferase activity // inferred from electronic annotation /// 30170 // pyridoxal phosphate binding // inferred from electronic annotation /// 3824 // catalytic activity // inferred from electronic ann…	9102 // biotin biosynthesis // inferred from electronic annotation /// 8152 // metabolism // inferred from electronic annotation /// 9058 // biosynthesis // inferred from electronic annotation /// 9236 // cobalamin biosynthesis // inferred from electronic annotation	---	---
10428	151627_s_at	0.675385	1.39194	8.47568	1.27e-09	2.44e-08	11.5661	FBgn0003423	CG1417	slgA	sluggish A	33117	4657 // proline dehydrogenase activity // inferred from sequence or structural similarity /// 4657 // proline dehydrogenase activity // inferred from electronic annotation /// 16491 // oxidoreductase activity // inferred from electronic annotation /// 4657 // proline dehydrogenase activity // inferred from sequence similarity	6537 // glutamate biosynthesis // inferred from sequence or structural similarity /// 6537 // glutamate biosynthesis // non-traceable author statement /// 6562 // proline catabolism // inferred from sequence or structural similarity /// 6562 // proline catabolism // non-traceable author statement /// 7626 // locomotory behavior // inferred from mutant phenotype /// 6537 // glutamate biosynthesis …	5759 // mitochondrial matrix // inferred from sequence or structural similarity /// 5759 // mitochondrial matrix // non-traceable author statement /// 5739 // mitochondrion // inferred from electronic annotation /// 5759 // mitochondrial matrix // inferred from sequence similarity	IPR002872 // Proline dehydrogenase // 1.0E-126 /// IPR002872 // Proline dehydrogenase // 1.0E-126 /// IPR002872 // Proline dehydrogenase // 1.0E-126
10741	151940_at	0.724772	2.00936	8.46473	1.3e-09	2.51e-08	11.5371	FBgn0034844	CG9861	CG9861	CG9861	37692	---	---	---	---
5364	146563_f_at	0.636128	0.813974	8.46117	1.31e-09	2.53e-08	11.5277	FBgn0053317	CG33317	CG33317	CG33317	2768930	3729 // mRNA binding // inferred from sequence or structural similarity /// 3729 // mRNA binding // inferred from sequence similarity	---	---	---
2582	143781_at	0.909169	2.24211	8.45879	1.32e-09	2.53e-08	11.5214	FBgn0015035	CG4105	Cyp4e3	Cytochrome P450-4e3	34291	4497 // monooxygenase activity // inferred from electronic annotation /// 16491 // oxidoreductase activity // inferred from electronic annotation /// 5506 // iron ion binding // inferred from electronic annotation /// 20037 // heme binding // inferred from electronic annotation /// 46872 // metal ion binding // inferred from electronic annotation	6118 // electron transport // inferred from electronic annotation /// 8202 // steroid metabolism // inferred from electronic annotation	5792 // microsome // non-traceable author statement /// 16020 // membrane // non-traceable author statement /// 5783 // endoplasmic reticulum // inferred from electronic annotation /// 5792 // microsome // inferred from electronic annotation /// 16020 // membrane // inferred from electronic annotation	IPR001128 // Cytochrome P450 // 3.7E-94 /// IPR001128 // Cytochrome P450 // 5.6E-76
5603	146802_at	1.0202	1.89661	8.45825	1.32e-09	2.53e-08	11.52	FBgn0033283	CG11635	CG11635	CG11635	35808	5515 // protein binding // inferred from physical interaction	---	---	IPR006611 // Cysteine-rich protein of unknown function DM6 // 9.7E-71
11446	152645_at	0.782809	3.04078	8.46	1.32e-09	2.53e-08	11.5246	FBgn0031690	CG7742	CG7742	CG7742	33750	5515 // protein binding // inferred from physical interaction	---	---	---
1280	142479_at	1.03103	1.84356	8.42305	1.45e-09	2.74e-08	11.4268	FBgn0063492	CG17533	GstE8	Glutathione S transferase E8	37113	5515 // protein binding // inferred from physical interaction /// 4364 // glutathione transferase activity // inferred from electronic annotation /// 16740 // transferase activity // inferred from electronic annotation	---	---	IPR004046 // Glutathione S-transferase, C-terminal // 8.9E-12 /// IPR004045 // Glutathione S-transferase, N-terminal // 6.0E-18 /// IPR004046 // Glutathione S-transferase, C-terminal // 9.0E-13
12788	153987_at	0.835386	2.59784	8.4226	1.45e-09	2.74e-08	11.4256	FBgn0026315	CG6644	Ugt35a	UDP-glycosyltransferase 35a	41334	8194 // UDP-glycosyltransferase activity // non-traceable author statement /// 15020 // glucuronosyltransferase activity // inferred from sequence or structural similarity /// 16740 // transferase activity // inferred from electronic annotation /// 16757 // transferase activity, transferring glycosyl groups // inferred from electronic annotation /// 16758 // transferase activity, transferring hex…	5976 // polysaccharide metabolism // inferred from electronic annotation /// 6952 // defense response // inferred from electronic annotation /// 8202 // steroid metabolism // inferred from electronic annotation /// 9636 // response to toxin // inferred from electronic annotation /// 8152 // metabolism // inferred from electronic annotation	---	IPR002213 // UDP-glucoronosyl/UDP-glucosyl transferase // 6.1E-68
7892	149091_at	0.426888	-0.26253	8.4132	1.49e-09	2.81e-08	11.4007	FBgn0036937	CG7385	CG7385	CG7385	40198	4872 // receptor activity // inferred from electronic annotation /// 4970 // ionotropic glutamate receptor activity // inferred from electronic annotation /// 5234 // glutamate-gated ion channel activity // inferred from sequence or structural similarity /// 5216 // ion channel activity // inferred from electronic annotation /// 5234 // glutamate-gated ion channel activity // inferred from electr…	6811 // ion transport // inferred from electronic annotation	16020 // membrane // inferred from electronic annotation	IPR001320 // Ionotropic glutamate receptor // 8.3E-23
7490	148689_at	0.932717	2.84569	8.41038	1.5e-09	2.82e-08	11.3932	FBgn0036334	CG11267	CG11267	CG11267	39476	5524 // ATP binding // inferred from electronic annotation /// 42623 // ATPase activity, coupled // inferred from electronic annotation /// 51082 // unfolded protein binding // inferred from sequence or structural similarity /// 5515 // protein binding // inferred from physical interaction /// 51082 // unfolded protein binding // inferred from electronic annotation /// 51082 // unfolded protein b…	6458 // 'de novo' protein folding // inferred from sequence or structural similarity /// 6457 // protein folding // inferred from electronic annotation /// 6458 // 'de novo' protein folding // inferred from sequence similarity	5739 // mitochondrion // inferred from sequence or structural similarity /// 5759 // mitochondrial matrix // inferred from sequence or structural similarity /// 5739 // mitochondrion // inferred from sequence similarity /// 5759 // mitochondrial matrix // inferred from sequence similarity	IPR001476 // Chaperonin Cpn10 // 4.6E-38
5504	146703_at	0.579783	-0.803741	8.40265	1.53e-09	2.88e-08	11.3727	FBgn0050158	CG30158	CG30158	CG30158	50149	3924 // GTPase activity // inferred from electronic annotation /// 5525 // GTP binding // inferred from sequence or structural similarity /// 166 // nucleotide binding // inferred from electronic annotation /// 5525 // GTP binding // inferred from electronic annotation /// 5525 // GTP binding // inferred from sequence similarity	7263 // nitric oxide mediated signal transduction // inferred from electronic annotation /// 7264 // small GTPase mediated signal transduction // inferred from electronic annotation /// 15031 // protein transport // inferred from electronic annotation	16020 // membrane // inferred from electronic annotation	IPR001806 // Ras GTPase superfamily // 2.8E-36
5286	146485_at	0.554672	1.99635	8.36954	1.67e-09	3.12e-08	11.2848	FBgn0032768	CG17564	CG17564	CG17564	35205	---	---	---	---
3696	144895_f_at	2.52449	1.92841	8.3674	1.68e-09	3.12e-08	11.2791	FBgn0001218	CG4147	Hsc70-3	Heat shock protein cognate 3	32133	5524 // ATP binding // inferred from electronic annotation /// 16887 // ATPase activity // non-traceable author statement /// 166 // nucleotide binding // inferred from electronic annotation	6457 // protein folding // inferred from electronic annotation /// 6461 // protein complex assembly // inferred from electronic annotation /// 6952 // defense response // inferred from electronic annotation /// 9408 // response to heat // inferred from sequence or structural similarity /// 9408 // response to heat // non-traceable author statement /// 30431 // sleep // traceable author statement …	5783 // endoplasmic reticulum // non-traceable author statement /// 5783 // endoplasmic reticulum // inferred from electronic annotation	IPR001023 // Heat shock protein Hsp70 // 1.0E-126
4699	145898_at	0.766475	-0.0865356	8.35886	1.72e-09	3.19e-08	11.2564	FBgn0031811	CG13982	CG13982	CG13982	33895	---	---	---	---
4570	145769_at	0.935022	2.12213	8.35654	1.73e-09	3.2e-08	11.2503	FBgn0031617	CG15635	CG15635	CG15635	33665	3677 // DNA binding // inferred from electronic annotation /// 8170 // N-methyltransferase activity // inferred from electronic annotation	6306 // DNA methylation // inferred from electronic annotation	---	---
1225	142424_at	0.704741	1.6085	8.35496	1.74e-09	3.21e-08	11.2461	FBgn0032483	CG15482	CG15482	CG15482	34717	---	---	---	---
11523	152722_at	0.913826	1.42722	8.3494	1.76e-09	3.25e-08	11.2313	FBgn0037616	CG8136	CG8136	CG8136	41037	5515 // protein binding // inferred from physical interaction	---	---	---
8638	149837_at	0.533229	0.426198	8.34539	1.78e-09	3.28e-08	11.2206	FBgn0038144	CG8870	CG8870	CG8870	41645	3677 // DNA binding // inferred from electronic annotation /// 3700 // transcription factor activity // inferred from electronic annotation /// 4263 // chymotrypsin activity // inferred from electronic annotation /// 4295 // trypsin activity // non-traceable author statement /// 8439 // monophenol monooxygenase activator activity // inferred from sequence or structural similarity /// 8439 // mono…	6355 // regulation of transcription, DNA-dependent // inferred from electronic annotation /// 6508 // proteolysis // non-traceable author statement	5634 // nucleus // inferred from electronic annotation	IPR001254 // Peptidase S1, chymotrypsin // 1.5E-45
356	141555_at	0.570173	1.87761	8.33694	1.82e-09	3.35e-08	11.1982	FBgn0031574	CG3964	CG3964	CG3964	33609	4835 // tubulin-tyrosine ligase activity // inferred from sequence or structural similarity /// 5200 // structural constituent of cytoskeleton // inferred from electronic annotation /// 4835 // tubulin-tyrosine ligase activity // inferred from electronic annotation /// 4835 // tubulin-tyrosine ligase activity // inferred from sequence similarity	6464 // protein modification // inferred from electronic annotation /// 19538 // protein metabolism // inferred from electronic annotation	---	IPR004344 // Tubulin-tyrosine ligase // 1.0E-126
13580	154779_at	0.48283	1.81609	8.33581	1.83e-09	3.35e-08	11.1951	FBgn0039234	CG7012	nct	nicastrin	42964	---	6509 // membrane protein ectodomain proteolysis // inferred from mutant phenotype /// 6509 // membrane protein ectodomain proteolysis // non-traceable author statement /// 7010 // cytoskeleton organization and biogenesis // inferred from mutant phenotype /// 7219 // Notch signaling pathway // inferred from mutant phenotype /// 7219 // Notch signaling pathway // non-traceable author statement /// …	5886 // plasma membrane // non-traceable author statement /// 16021 // integral to membrane // non-traceable author statement /// 16020 // membrane // inferred from electronic annotation /// 16021 // integral to membrane // inferred from electronic annotation	IPR008710 // Nicastrin // 1.0E-126 /// IPR008710 // Nicastrin // 1.0E-126
5278	146477_at	0.847162	2.73021	8.31537	1.93e-09	3.52e-08	11.1407	FBgn0032755	CG17344	CG17344	CG17344	35185	---	---	---	---
9040	150239_at	0.58411	0.489612	8.29071	2.06e-09	3.74e-08	11.075	FBgn0038764	CG4845	CG4845	CG4845	42389	5488 // binding // inferred from electronic annotation	---	---	---
13810	155009_at	0.737464	2.31955	8.28396	2.09e-09	3.78e-08	11.057	FBgn0034410	CG15104	Topors	Topoisomerase I-interacting protein	37188	4842 // ubiquitin-protein ligase activity // inferred from direct assay /// 8270 // zinc ion binding // inferred from electronic annotation /// 17033 // DNA topoisomerase I binding // inferred from sequence or structural similarity /// 5515 // protein binding // inferred from electronic annotation /// 46872 // metal ion binding // inferred from electronic annotation /// 17033 // DNA topoisomerase…	16567 // protein ubiquitination // inferred from electronic annotation	151 // ubiquitin ligase complex // inferred from electronic annotation	---
11448	152647_at	0.693667	2.30767	8.28304	2.1e-09	3.79e-08	11.0546	FBgn0042710	CG32849	Hex-t2	Hex-t2	43191	4396 // hexokinase activity // non-traceable author statement /// 5524 // ATP binding // inferred from electronic annotation /// 166 // nucleotide binding // inferred from electronic annotation /// 4396 // hexokinase activity // inferred from electronic annotation /// 16301 // kinase activity // inferred from electronic annotation /// 16740 // transferase activity // inferred from electronic anno…	6096 // glycolysis // non-traceable author statement /// 6096 // glycolysis // inferred from electronic annotation	---	IPR001312 // Hexokinase // 3.0E-90 /// IPR001312 // Hexokinase // 7.7E-99
3022	144221_at	0.957467	2.36533	8.27999	2.12e-09	3.81e-08	11.0464	FBgn0028513	CG9254	CG9254	CG9254	34773	5436 // sodium:phosphate symporter activity // inferred from sequence or structural similarity /// 5515 // protein binding // inferred from physical interaction /// 5215 // transporter activity // inferred from electronic annotation /// 5436 // sodium:phosphate symporter activity // inferred from sequence similarity	6796 // phosphate metabolism // inferred from electronic annotation /// 6812 // cation transport // inferred from electronic annotation /// 6817 // phosphate transport // inferred from electronic annotation /// 6858 // extracellular transport // inferred from electronic annotation /// 6810 // transport // inferred from electronic annotation	16021 // integral to membrane // inferred from electronic annotation /// 16020 // membrane // inferred from electronic annotation	IPR005828 // General substrate transporter // 6.5E-5
6314	147513_at	0.739027	1.95289	8.2782	2.13e-09	3.83e-08	11.0417	FBgn0034467	CG15128	CG15128	CG15128	37263	5488 // binding // inferred from electronic annotation	---	---	IPR010782 // Protein of unknown function DUF1377 // 1.0E-126
12854	154053_at	0.886987	3.30775	8.27546	2.14e-09	3.85e-08	11.0343	FBgn0020653	CG2151	Trxr-1	Thioredoxin reductase-1	31760	4362 // glutathione-disulfide reductase activity // inferred from direct assay /// 4362 // glutathione-disulfide reductase activity // non-traceable author statement /// 4791 // thioredoxin-disulfide reductase activity // inferred from direct assay /// 4791 // thioredoxin-disulfide reductase activity // inferred from sequence or structural similarity /// 16209 // antioxidant activity // inferred …	6125 // thioredoxin pathway // inferred from direct assay /// 6790 // sulfur metabolism // inferred from electronic annotation /// 8340 // determination of adult life span // traceable author statement /// 6125 // thioredoxin pathway // inferred from mutant phenotype /// 6118 // electron transport // inferred from electronic annotation	5737 // cytoplasm // inferred from direct assay /// 5737 // cytoplasm // non-traceable author statement /// 5739 // mitochondrion // inferred from direct assay /// 5737 // cytoplasm // inferred from electronic annotation /// 5739 // mitochondrion // inferred from electronic annotation	IPR004099 // Pyridine nucleotide-disulphide oxidoreductase dimerisation domain // 8.3E-42 /// IPR001327 // FAD-dependent pyridine nucleotide-disulphide oxidoreductase // 8.2E-94 /// IPR004099 // Pyridine nucleotide-disulphide oxidoreductase dimerisation domain // 8.3E-42 /// IPR001327 // FAD-dependent pyridine nucleotide-disulphide oxidoreductase // 8.2E-94 /// IPR004099 // Pyridine nucleotide-di…
2850	144049_at	0.356225	0.721101	8.26256	2.21e-09	3.97e-08	10.9999	FBgn0025109	CG18642	Bem46	Bem46	44441	3824 // catalytic activity // inferred from electronic annotation	---	---	---
2896	144095_at	0.520573	2.47554	8.25958	2.23e-09	3.99e-08	10.992	FBgn0067861	CG9580	Sdic:CG9580	Sdic:CG9580	43984	---	---	---	IPR001680 // G-protein beta WD-40 repeat // 0.047 /// IPR001680 // G-protein beta WD-40 repeat // 0.081 /// IPR001680 // G-protein beta WD-40 repeat // 4.5E-5
7845	149044_at	0.671591	0.667461	8.24797	2.3e-09	4.1e-08	10.9609	FBgn0036868	CG14087	CG14087	CG14087	40109	---	---	---	---
1399	142598_at	0.634632	1.97761	8.20317	2.59e-09	4.58e-08	10.8412	FBgn0039010	CG4907	CG4907	CG4907	42686	---	---	---	IPR007070 // Phosphatidylinositolglycan class N (PIG-N) // 1.0E-126
6791	147990_at	0.533541	0.438753	8.20406	2.59e-09	4.58e-08	10.8435	FBgn0035243	CG13926	CG13926	CG13926	38192	---	---	---	IPR008493 // Protein of unknown function DUF775 // 1.0E-126
604	141803_at	1.01643	2.36782	8.18996	2.68e-09	4.74e-08	10.8058	FBgn0041585	CG11430	olf186-F	olf186-F	37040	4252 // serine-type endopeptidase activity // non-traceable author statement	---	---	---
5468	146667_at	0.567453	0.65559	8.1718	2.82e-09	4.95e-08	10.7571	FBgn0033056	CG7856	CG7856	CG7856	35533	---	---	---	---
11914	153113_at	0.787508	2.70743	8.17149	2.82e-09	4.95e-08	10.7563	FBgn0036318	CG11009	CG11009	CG11009	39460	---	---	---	IPR004182 // GRAM domain // 3.1E-15
2527	143726_at	0.455084	0.154227	8.15579	2.94e-09	5.13e-08	10.7142	FBgn0013812	CG3723	Dhc93AB	Dynein heavy chain at 93AB	42485	166 // nucleotide binding // inferred from electronic annotation /// 3774 // motor activity // inferred from sequence or structural similarity /// 3777 // microtubule motor activity // inferred from electronic annotation /// 4197 // cysteine-type endopeptidase activity // inferred from electronic annotation /// 5200 // structural constituent of cytoskeleton // inferred from electronic annotation …	6508 // proteolysis // inferred from electronic annotation /// 6928 // cell motility // inferred from electronic annotation /// 7018 // microtubule-based movement // inferred from sequence or structural similarity /// 7018 // microtubule-based movement // inferred from sequence similarity	5858 // axonemal dynein complex // inferred from sequence or structural similarity /// 5875 // microtubule associated complex // inferred from sequence or structural similarity /// 5858 // axonemal dynein complex // inferred from sequence similarity /// 5875 // microtubule associated complex // inferred from sequence similarity	IPR004273 // Dynein heavy chain // 1.0E-126
8589	149788_at	0.662677	2.09823	8.14064	3.06e-09	5.32e-08	10.6735	FBgn0038067	CG11598	CG11598	CG11598	41554	4806 // triacylglycerol lipase activity // inferred from sequence or structural similarity /// 16298 // lipase activity // inferred from sequence or structural similarity /// 3824 // catalytic activity // inferred from electronic annotation /// 16787 // hydrolase activity // inferred from electronic annotation /// 16789 // carboxylic ester hydrolase activity // inferred from electronic annotation…	6629 // lipid metabolism // inferred from electronic annotation /// 6629 // lipid metabolism // inferred from sequence or structural similarity /// 16042 // lipid catabolism // inferred from electronic annotation /// 6629 // lipid metabolism // inferred from sequence similarity	---	IPR000073 // Alpha/beta hydrolase fold // 2.2E-14 /// IPR006693 // Ab-hydrolase associated lipase region // 3.7E-19 /// IPR000073 // Alpha/beta hydrolase fold // 2.2E-14 /// IPR006693 // Ab-hydrolase associated lipase region // 1.7E-20
1420	142619_at	0.940998	1.41349	8.11603	3.27e-09	5.64e-08	10.6074	FBgn0033610	CG18335	CG18335	CG18335	36202	---	---	---	---
7034	148233_at	0.751274	-0.492971	8.10429	3.37e-09	5.81e-08	10.5759	FBgn0035626	CG17334	lin-28	lin-28	38639	3676 // nucleic acid binding // inferred from electronic annotation /// 3677 // DNA binding // inferred from electronic annotation /// 8270 // zinc ion binding // inferred from electronic annotation	6355 // regulation of transcription, DNA-dependent // inferred from electronic annotation	---	IPR002059 // Cold-shock DNA-binding domain // 2.4E-27
1861	143060_f_at	1.26426	3.09578	8.08666	3.53e-09	6.07e-08	10.5284	FBgn0000045	CG7478	Act79B	Actin 79B	40444	3774 // motor activity // inferred from electronic annotation /// 5200 // structural constituent of cytoskeleton // inferred from sequence or structural similarity /// 166 // nucleotide binding // inferred from electronic annotation /// 5198 // structural molecule activity // inferred from electronic annotation /// 5200 // structural constituent of cytoskeleton // inferred from electronic annotat…	7010 // cytoskeleton organization and biogenesis // inferred from sequence or structural similarity /// 7010 // cytoskeleton organization and biogenesis // inferred from sequence similarity	5884 // actin filament // inferred from sequence or structural similarity /// 5884 // actin filament // non-traceable author statement /// 5856 // cytoskeleton // inferred from electronic annotation /// 5884 // actin filament // inferred from electronic annotation /// 5884 // actin filament // inferred from sequence similarity	IPR004000 // Actin/actin-like // 1.0E-126
4445	145644_at	0.511819	-0.410317	8.08637	3.53e-09	6.07e-08	10.5277	FBgn0031429	CG15393	CG15393	CG15393	33433	---	---	---	---
549	141748_at	0.784632	4.3963	8.08228	3.57e-09	6.13e-08	10.5167	FBgn0052030	CG32030	CG32030	CG32030	39004	3779 // actin binding // inferred from sequence or structural similarity /// 3677 // DNA binding // inferred from electronic annotation /// 3779 // actin binding // inferred from electronic annotation /// 5488 // binding // inferred from electronic annotation /// 3779 // actin binding // inferred from sequence similarity	16043 // cell organization and biogenesis // inferred from electronic annotation /// 30036 // actin cytoskeleton organization and biogenesis // inferred from electronic annotation	5634 // nucleus // inferred from electronic annotation	IPR003104 // Actin-binding FH2 // 1.4E-123
6105	147304_at	0.937969	1.85692	8.08098	3.58e-09	6.14e-08	10.5132	FBgn0034121	CG6262	CG6262	CG6262	36833	4555 // alpha,alpha-trehalase activity // inferred from electronic annotation /// 15927 // trehalase activity // inferred from sequence or structural similarity /// 16799 // hydrolase activity, hydrolyzing N-glycosyl compounds // inferred from electronic annotation /// 15927 // trehalase activity // inferred from sequence similarity	5984 // disaccharide metabolism // inferred from electronic annotation /// 5991 // trehalose metabolism // inferred from electronic annotation	---	IPR001661 // Glycoside hydrolase, family 37 // 9.4E-103 /// IPR001661 // Glycoside hydrolase, family 37 // 3.6E-63
351	141550_at	1.10589	1.53764	8.07516	3.64e-09	6.22e-08	10.4975	FBgn0034936	CG2970	CG2970	CG2970	37807	5200 // structural constituent of cytoskeleton // inferred from electronic annotation	7010 // cytoskeleton organization and biogenesis // inferred from electronic annotation	16020 // membrane // inferred from electronic annotation	IPR001107 // Band 7 protein // 1.5E-75
2603	143802_at	0.734993	0.981795	8.07489	3.64e-09	6.22e-08	10.4967	FBgn0015351	CG14906	CG14906	CG14906	42030	8168 // methyltransferase activity // inferred from electronic annotation	6139 // nucleobase, nucleoside, nucleotide and nucleic acid metabolism // inferred from electronic annotation	5634 // nucleus // inferred from electronic annotation	IPR007757 // MT-A70 // 9.4E-92
564	141763_at	0.653434	0.686353	8.07322	3.66e-09	6.24e-08	10.4923	FBgn0035235	CG7879	CG7879	CG7879	38184	3729 // mRNA binding // inferred from sequence or structural similarity /// 166 // nucleotide binding // inferred from electronic annotation /// 3676 // nucleic acid binding // inferred from electronic annotation /// 3729 // mRNA binding // inferred from sequence similarity	381 // regulation of alternative nuclear mRNA splicing, via spliceosome // inferred from mutant phenotype	5634 // nucleus // Unknown /// 5634 // nucleus // inferred from curator	IPR000504 // RNA-binding region RNP-1 (RNA recognition motif) // 4.4E-9 /// IPR000504 // RNA-binding region RNP-1 (RNA recognition motif) // 1.2E-9
6898	148097_at	0.453078	1.39942	8.04784	3.92e-09	6.64e-08	10.4239	FBgn0035426	CG12078	CG12078	CG12078	38401	16791 // phosphoric monoester hydrolase activity // inferred from electronic annotation	7275 // development // inferred from electronic annotation /// 7398 // ectoderm development // inferred from electronic annotation /// 7399 // nervous system development // inferred from electronic annotation	---	IPR004274 // NLI interacting factor // 3.1E-104
6107	147306_at	0.752454	2.56302	8.04087	3.99e-09	6.75e-08	10.4051	FBgn0029154 /// FBgn0029153	CG7969 /// CG7964	Menl-1 /// Menl-2	Menl-1 /// Menl-2	3772542 /// 3772692	4473 // malate dehydrogenase (oxaloacetate-decarboxylating) (NADP+) activity // inferred from sequence or structural similarity /// 4473 // malate dehydrogenase (oxaloacetate-decarboxylating) (NADP+) activity // non-traceable author statement /// 4470 // malic enzyme activity // inferred from electronic annotation /// 16491 // oxidoreductase activity // inferred from electronic annotation /// 166…	6108 // malate metabolism // inferred from electronic annotation	5739 // mitochondrion // inferred from sequence or structural similarity /// 5739 // mitochondrion // inferred from sequence similarity	---
8774	149973_at	0.603211	2.02569	8.03601	4.04e-09	6.83e-08	10.392	FBgn0038361	CG9589	CG9589	CG9589	41908	4852 // uroporphyrinogen-III synthase activity // inferred from electronic annotation /// 4852 // uroporphyrinogen-III synthase activity // inferred from sequence or structural similarity /// 16787 // hydrolase activity // inferred from electronic annotation /// 4852 // uroporphyrinogen-III synthase activity // inferred from sequence similarity	6778 // porphyrin metabolism // inferred from electronic annotation /// 6779 // porphyrin biosynthesis // inferred from electronic annotation /// 6783 // heme biosynthesis // inferred from electronic annotation	---	---
4778	145977_at	1.2717	0.994265	8.03159	4.09e-09	6.89e-08	10.3801	FBgn0031939 /// FBgn0051904	CG13796 /// CG31904	CG13796 /// CG31904	CG13796 /// CG31904	319016 /// 34051	3700 // transcription factor activity // inferred from electronic annotation /// 5328 // neurotransmitter:sodium symporter activity // inferred from electronic annotation /// 15187 // glycine transporter activity // inferred from sequence or structural similarity /// 15293 // symporter activity // inferred from electronic annotation /// 15187 // glycine transporter activity // inferred from seque…	6355 // regulation of transcription, DNA-dependent // inferred from electronic annotation /// 6520 // amino acid metabolism // inferred from electronic annotation /// 6811 // ion transport // inferred from electronic annotation /// 6836 // neurotransmitter transport // inferred from electronic annotation /// 6858 // extracellular transport // inferred from electronic annotation /// 6865 // amino …	5622 // intracellular // inferred from electronic annotation /// 5887 // integral to plasma membrane // inferred from electronic annotation /// 16020 // membrane // inferred from electronic annotation /// 16021 // integral to membrane // inferred from electronic annotation	IPR000175 // Sodium:neurotransmitter symporter // 2.0E-8
9064	150263_at	1.1227	1.54127	8.03103	4.1e-09	6.89e-08	10.3786	FBgn0067782 /// FBgn0067783	CG4241 /// CG33488	att-ORFB /// att-ORFA	alternative testis transcripts open reading frame B /// alternative testis transcripts open reading frame A	2768673 /// 42429	5386 // carrier activity // inferred from sequence or structural similarity /// 5488 // binding // inferred from electronic annotation /// 5386 // carrier activity // inferred from sequence similarity	6810 // transport // inferred from electronic annotation	5740 // mitochondrial envelope // inferred from sequence or structural similarity /// 5743 // mitochondrial inner membrane // inferred from electronic annotation /// 16020 // membrane // inferred from electronic annotation /// 16021 // integral to membrane // inferred from electronic annotation /// 5740 // mitochondrial envelope // inferred from sequence similarity	IPR001993 // Mitochondrial substrate carrier // 2.7E-24 /// IPR001993 // Mitochondrial substrate carrier // 2.7E-29 /// IPR001993 // Mitochondrial substrate carrier // 2.1E-30 /// IPR001993 // Mitochondrial substrate carrier // 5.6E-22 /// IPR001993 // Mitochondrial substrate carrier // 2.7E-29 /// IPR001993 // Mitochondrial substrate carrier // 2.1E-30
7386	148585_s_at	0.454548	-0.0378864	8.02802	4.13e-09	6.93e-08	10.3704	FBgn0036177 /// FBgn0036176	CG7377 /// CG33268	CG33268 /// CG7377	CG33268 /// CG7377	2768978 /// 2768979	---	---	---	---
8531	149730_at	0.76884	1.38154	8.0236	4.18e-09	6.99e-08	10.3585	FBgn0037987	CG14739	CG14739	CG14739	41467	4840 // ubiquitin conjugating enzyme activity // inferred from sequence or structural similarity /// 16874 // ligase activity // inferred from electronic annotation /// 5515 // protein binding // inferred from physical interaction /// 4842 // ubiquitin-protein ligase activity // inferred from electronic annotation /// 4840 // ubiquitin conjugating enzyme activity // inferred from sequence similar…	6464 // protein modification // inferred from electronic annotation /// 6512 // ubiquitin cycle // inferred from electronic annotation /// 19538 // protein metabolism // inferred from electronic annotation	---	IPR000608 // Ubiquitin-conjugating enzymes // 1.0E-47
9894	151093_at	0.599708	-0.303361	8.02363	4.18e-09	6.99e-08	10.3586	---	CG14245 /// CG14246	---	---	---	---	---	---	---
10700	151899_at	1.2918	3.39059	8.02049	4.21e-09	7.03e-08	10.3501	FBgn0036992	CG11796	CG11796	CG11796	40263	3868 // 4-hydroxyphenylpyruvate dioxygenase activity // inferred from sequence or structural similarity /// 5515 // protein binding // inferred from physical interaction /// 3868 // 4-hydroxyphenylpyruvate dioxygenase activity // inferred from electronic annotation /// 3868 // 4-hydroxyphenylpyruvate dioxygenase activity // inferred from sequence similarity	9063 // amino acid catabolism // inferred from electronic annotation /// 9072 // aromatic amino acid family metabolism // inferred from electronic annotation	---	IPR004360 // Glyoxalase/Bleomycin resistance protein/dioxygenase domain // 1.9E-17 /// IPR004360 // Glyoxalase/Bleomycin resistance protein/dioxygenase domain // 1.9E-17
8557	149756_at	1.54068	2.01697	8.00121	4.44e-09	7.36e-08	10.298	FBgn0010038	CG4181	GstD2	Glutathione S transferase D2	48335	4364 // glutathione transferase activity // inferred from direct assay /// 4364 // glutathione transferase activity // inferred from sequence or structural similarity /// 4364 // glutathione transferase activity // non-traceable author statement /// 4602 // glutathione peroxidase activity // traceable author statement /// 4364 // glutathione transferase activity // inferred from sequence similari…	6952 // defense response // inferred from electronic annotation /// 9636 // response to toxin // inferred from electronic annotation	---	IPR004046 // Glutathione S-transferase, C-terminal // 8.6E-12 /// IPR004045 // Glutathione S-transferase, N-terminal // 6.4E-18
10255	151454_at	0.760168	1.93287	7.99813	4.47e-09	7.41e-08	10.2897	FBgn0040996	CG12617	CG12617	CG12617	50470	---	---	---	---
12079	153278_at	1.00089	2.0128	7.99467	4.51e-09	7.45e-08	10.2804	FBgn0010621	CG8439	Cct5	T-complex Chaperonin 5	36308	5524 // ATP binding // inferred from electronic annotation /// 42623 // ATPase activity, coupled // inferred from sequence or structural similarity /// 51082 // unfolded protein binding // inferred from sequence or structural similarity /// 166 // nucleotide binding // inferred from electronic annotation /// 5515 // protein binding // inferred from electronic annotation /// 51082 // unfolded prot…	6457 // protein folding // inferred from sequence or structural similarity /// 6457 // protein folding // inferred from electronic annotation /// 44267 // cellular protein metabolism // inferred from electronic annotation /// 6457 // protein folding // inferred from sequence similarity	5832 // chaperonin-containing T-complex // inferred from sequence or structural similarity /// 5832 // chaperonin-containing T-complex // inferred from sequence similarity	IPR002423 // Chaperonin Cpn60/TCP-1 // 1.0E-126 /// IPR002423 // Chaperonin Cpn60/TCP-1 // 1.0E-126
12700	153899_at	0.640152	5.16334	7.97962	4.7e-09	7.71e-08	10.2397	FBgn0013325	CG7726	RpL11	Ribosomal protein L11	37235	3676 // nucleic acid binding // inferred from electronic annotation /// 3735 // structural constituent of ribosome // inferred from sequence or structural similarity /// 3735 // structural constituent of ribosome // non-traceable author statement /// 5515 // protein binding // inferred from physical interaction /// 3723 // RNA binding // inferred from electronic annotation /// 3735 // structural …	6412 // protein biosynthesis // inferred from sequence or structural similarity /// 6412 // protein biosynthesis // non-traceable author statement /// 6412 // protein biosynthesis // inferred from electronic annotation /// 6412 // protein biosynthesis // inferred from sequence similarity	5840 // ribosome // non-traceable author statement /// 5842 // cytosolic large ribosomal subunit (sensu Eukaryota) // inferred from sequence or structural similarity /// 5842 // cytosolic large ribosomal subunit (sensu Eukaryota) // non-traceable author statement /// 5622 // intracellular // inferred from electronic annotation /// 5840 // ribosome // inferred from electronic annotation /// 30529 …	IPR002132 // Ribosomal protein L5 // 3.6E-24 /// IPR002132 // Ribosomal protein L5 // 1.5E-61 /// IPR002132 // Ribosomal protein L5 // 2.3E-20
9493	150692_at	0.547818	1.55352	7.97731	4.73e-09	7.75e-08	10.2335	FBgn0039462	CG14252	CG14252	CG14252	43238	---	---	---	---
3215	144414_at	0.54572	1.29625	7.96998	4.82e-09	7.85e-08	10.2136	FBgn0040335	CG10260	CG10260	CG10260	31247	4430 // 1-phosphatidylinositol 4-kinase activity // inferred from sequence or structural similarity /// 4430 // 1-phosphatidylinositol 4-kinase activity // non-traceable author statement /// 4428 // inositol or phosphatidylinositol kinase activity // inferred from electronic annotation /// 16301 // kinase activity // inferred from electronic annotation /// 16740 // transferase activity // inferre…	7242 // intracellular signaling cascade // inferred from electronic annotation /// 16310 // phosphorylation // non-traceable author statement	---	IPR000403 // Phosphatidylinositol 3- and 4-kinase // 4.0E-72 /// IPR001263 // Phosphoinositide 3-kinase accessory domain PIK // 2.3E-25
12864	154063_at	0.568812	0.305438	7.97005	4.82e-09	7.85e-08	10.2138	FBgn0037980	CG3313	CG3313	CG3313	41460	---	---	---	---
11278	152477_at	0.989184	1.66212	7.94928	5.1e-09	8.26e-08	10.1576	FBgn0052548	CG32548	CG32548	CG32548	32826	---	---	---	---
7866	149065_at	0.805439	0.913862	7.94825	5.11e-09	8.27e-08	10.1548	FBgn0036895	CG9392	CG9392	CG9392	40142	---	---	---	---
7204	148403_at	0.516887	-0.0526048	7.94615	5.14e-09	8.31e-08	10.1491	FBgn0020224	CG7037	Cbl	Cbl	38961	4842 // ubiquitin-protein ligase activity // inferred from electronic annotation /// 4871 // signal transducer activity // inferred from electronic annotation /// 8270 // zinc ion binding // inferred from electronic annotation /// 16874 // ligase activity // inferred from electronic annotation /// 16874 // ligase activity // traceable author statement /// 5509 // calcium ion binding // inferred f…	6508 // proteolysis // traceable author statement /// 6968 // cellular defense response // inferred from electronic annotation /// 7173 // epidermal growth factor receptor signaling pathway // traceable author statement /// 7175 // negative regulation of epidermal growth factor receptor activity // inferred from mutant phenotype /// 7175 // negative regulation of epidermal growth factor receptor …	151 // ubiquitin ligase complex // inferred from electronic annotation /// 5634 // nucleus // inferred from electronic annotation	IPR000449 // Ubiquitin-associated domain // 3.3E-8 /// IPR003153 // Adaptor protein Cbl, N-terminal // 2.2E-106 /// IPR003153 // Adaptor protein Cbl, N-terminal // 2.0E-70 /// IPR001841 // Zn-finger, RING // 1.5E-15 /// IPR003153 // Adaptor protein Cbl, N-terminal // 8.8E-67
5396	146595_at	0.409909	0.712386	7.93333	5.32e-09	8.59e-08	10.1144	FBgn0032957	CG2225	CG2225	CG2225	35421	5515 // protein binding // inferred from physical interaction	---	---	---
1137	142336_at	0.935065	1.77225	7.93142	5.35e-09	8.62e-08	10.1093	FBgn0037064	CG9389	CG9389	CG9389	40347	8934 // inositol-1(or 4)-monophosphatase activity // non-traceable author statement /// 4437 // inositol or phosphatidylinositol phosphatase activity // inferred from electronic annotation	6644 // phospholipid metabolism // inferred from electronic annotation /// 7242 // intracellular signaling cascade // inferred from electronic annotation /// 16311 // dephosphorylation // non-traceable author statement	---	IPR000760 // Inositol monophosphatase // 6.0E-102
4033	145232_at	0.394913	-0.0449939	7.92149	5.49e-09	8.82e-08	10.0823	FBgn0030824	CG5070	CG5070	CG5070	32705	---	---	---	---
12233	153432_at	1.26214	4.99825	7.91307	5.62e-09	8.98e-08	10.0595	FBgn0022073	CG8846	Thor	Thor	33569	8190 // eukaryotic initiation factor 4E binding // inferred from direct assay /// 8190 // eukaryotic initiation factor 4E binding // inferred from sequence or structural similarity /// 8190 // eukaryotic initiation factor 4E binding // non-traceable author statement /// 5515 // protein binding // inferred from physical interaction /// 8190 // eukaryotic initiation factor 4E binding // inferred fr…	1558 // regulation of cell growth // inferred from genetic interaction /// 1558 // regulation of cell growth // inferred from mutant phenotype /// 6950 // response to stress // inferred from expression pattern /// 6952 // defense response // non-traceable author statement /// 6955 // immune response // inferred from expression pattern /// 6955 // immune response // inferred from mutant phenotype …	---	IPR008606 // Eukaryotic translation initiation factor 4E binding // 1.0E-80
4137	145336_at	1.09767	2.11736	7.9104	5.66e-09	9.04e-08	10.0523	FBgn0030975	CG7349	CG7349	CG7349	32887	104 // succinate dehydrogenase activity // inferred from sequence or structural similarity /// 5506 // iron ion binding // inferred from electronic annotation /// 16491 // oxidoreductase activity // inferred from electronic annotation /// 104 // succinate dehydrogenase activity // inferred from sequence similarity	6099 // tricarboxylic acid cycle // inferred from electronic annotation /// 6118 // electron transport // inferred from electronic annotation	5749 // respiratory chain complex II (sensu Eukaryota) // inferred from sequence or structural similarity /// 16020 // membrane // inferred from electronic annotation /// 5749 // respiratory chain complex II (sensu Eukaryota) // inferred from sequence similarity	IPR001041 // Ferredoxin // 5.6E-4
2237	143436_at	0.803334	4.64171	7.89544	5.89e-09	9.39e-08	10.0117	FBgn0004175	CG17935	Mst84Dd	Male-specific RNA 84Dd	40886	5506 // iron ion binding // inferred from electronic annotation	6118 // electron transport // inferred from electronic annotation /// 7275 // development // inferred from electronic annotation /// 7283 // spermatogenesis // inferred from electronic annotation /// 30154 // cell differentiation // inferred from electronic annotation	---	IPR005634 // Male specific sperm protein // 3.4E-18
7238	148437_at	0.426652	0.788717	7.86836	6.33e-09	1.01e-07	9.93815	FBgn0035948	CG5644	CG5644	CG5644	39029	16301 // kinase activity // inferred from electronic annotation /// 16740 // transferase activity // inferred from electronic annotation	---	---	IPR004119 // Protein of unknown function DUF227 // 7.2E-96
7277	148476_at	0.584443	0.689082	7.85457	6.57e-09	1.04e-07	9.90067	FBgn0036017	CG3280	CG3280	CG3280	39117	---	---	---	---
6699	147898_at	0.489074	0.0400074	7.85358	6.59e-09	1.04e-07	9.898	FBgn0035079	CG18506	CG18506	CG18506	37984	5515 // protein binding // inferred from physical interaction	---	---	---
412	141611_at	0.597	1.79748	7.85302	6.6e-09	1.04e-07	9.89647	FBgn0037373	CG2095	CG2095	CG2095	40712	5515 // protein binding // inferred from physical interaction	6886 // intracellular protein transport // inferred from electronic annotation /// 6887 // exocytosis // inferred from electronic annotation /// 6904 // vesicle docking during exocytosis // inferred from electronic annotation /// 15031 // protein transport // inferred from electronic annotation /// 6810 // transport // inferred from electronic annotation	145 // exocyst // inferred from electronic annotation	IPR004172 // L27 domain // 9.5E-15 /// IPR007191 // Sec8 exocyst complex component specific domain // 1.4E-81
135	141334_at	0.483398	0.446192	7.84587	6.73e-09	1.06e-07	9.87702	FBgn0036416	CG7924	CG7924	CG7924	39574	---	---	---	IPR002989 // Mycobacterial pentapeptide repeat // 1.5 /// IPR002989 // Mycobacterial pentapeptide repeat // 2.5E-5 /// IPR002989 // Mycobacterial pentapeptide repeat // 1.9E-5
5193	146392_at	0.566029	0.9589	7.83953	6.84e-09	1.07e-07	9.85977	FBgn0051806 /// FBgn0053179	CG33179 /// CG31806	CG31806 /// beat-IIIb	CG31806 /// beat-IIIb	261615 /// 35031	---	---	5576 // extracellular region // non-traceable author statement	IPR007110 // Immunoglobulin-like // 1.1E-4
4656	145855_at	0.823357	0.64332	7.83747	6.88e-09	1.08e-07	9.85419	FBgn0043362	CG14001	bchs	blue cheese	33819	8270 // zinc ion binding // inferred from electronic annotation	6605 // protein targeting // inferred from electronic annotation /// 7041 // lysosomal transport // inferred from sequence or structural similarity /// 7041 // lysosomal transport // inferred from sequence similarity	5737 // cytoplasm // inferred from direct assay /// 30424 // axon // non-traceable author statement	IPR000306 // Zn-finger, FYVE type // 1.4E-27 /// IPR000409 // Beige/BEACH domain // 1.0E-126 /// IPR001680 // G-protein beta WD-40 repeat // 6.2E-12 /// IPR001680 // G-protein beta WD-40 repeat // 0.042 /// IPR001680 // G-protein beta WD-40 repeat // 5.2E-5
8118	149317_at	0.566237	0.506851	7.82914	7.04e-09	1.1e-07	9.83152	FBgn0037308	CG31543	Hph	HIF prolyl hydroxylase	40633	16706 // oxidoreductase activity, acting on paired donors, with incorporation or reduction of molecular oxygen, 2-oxoglutarate as one donor, and incorporation of one atom each of oxygen into both donors // inferred from electronic annotation /// 31545 // peptidyl-proline 4-dioxygenase activity // inferred from sequence or structural similarity /// 5515 // protein binding // inferred from physical…	1666 // response to hypoxia // inferred from mutant phenotype /// 7424 // tracheal system development (sensu Insecta) // non-traceable author statement /// 8104 // protein localization // inferred from mutant phenotype /// 19538 // protein metabolism // inferred from electronic annotation	---	IPR002893 // Zn-finger, MYND type // 1.6E-16 /// IPR005123 // 2OG-Fe(II) oxygenase superfamily // 7.5E-16
1964	143163_at	0.54209	0.323209	7.82513	7.12e-09	1.11e-07	9.8206	FBgn0000715	CG2346	Fmrf	FMRFamide-related	36030	5179 // hormone activity // non-traceable author statement /// 5184 // neuropeptide hormone activity // non-traceable author statement /// 5184 // neuropeptide hormone activity // traceable author statement	6936 // muscle contraction // inferred from electronic annotation /// 7218 // neuropeptide signaling pathway // non-traceable author statement /// 7218 // neuropeptide signaling pathway // traceable author statement /// 45822 // negative regulation of heart contraction // inferred from direct assay /// 7218 // neuropeptide signaling pathway // inferred from electronic annotation	---	IPR002544 // FMRFamide-related peptide // 1.3 /// IPR002544 // FMRFamide-related peptide // 0.0037 /// IPR002544 // FMRFamide-related peptide // 0.0037 /// IPR002544 // FMRFamide-related peptide // 0.0037 /// IPR002544 // FMRFamide-related peptide // 0.0037 /// IPR002544 // FMRFamide-related peptide // 0.0037 /// IPR002544 // FMRFamide-related peptide // 0.0021 /// IPR002544 // FMRFamide-related …
368	141567_at	0.726195	1.69009	7.82301	7.16e-09	1.12e-07	9.81484	FBgn0028894	CG5869	CG5869	CG5869	34963	3779 // actin binding // inferred from sequence or structural similarity /// 5200 // structural constituent of cytoskeleton // inferred from electronic annotation /// 5515 // protein binding // inferred from physical interaction /// 3779 // actin binding // inferred from electronic annotation /// 8083 // growth factor activity // inferred from electronic annotation /// 3779 // actin binding // in…	7398 // ectoderm development // inferred from electronic annotation /// 42063 // gliogenesis // inferred from sequence or structural similarity /// 42063 // gliogenesis // inferred from sequence similarity	5622 // intracellular // inferred from electronic annotation	IPR002108 // Actin-binding, cofilin/tropomyosin type // 6.3E-19
437	141636_at	0.503754	0.954034	7.81726	7.27e-09	1.13e-07	9.79919	FBgn0039776	CG31022	PH4EFB	prolyl-4-hydroxylase-alpha EFB	43620	4656 // procollagen-proline 4-dioxygenase activity // inferred from sequence or structural similarity /// 5112 // Notch binding // inferred from physical interaction /// 5515 // protein binding // inferred from physical interaction /// 16706 // oxidoreductase activity, acting on paired donors, with incorporation or reduction of molecular oxygen, 2-oxoglutarate as one donor, and incorporation of o…	18401 // peptidyl-proline hydroxylation to 4-hydroxy-L-proline // inferred from sequence or structural similarity /// 8356 // asymmetric cell division // inferred from mutant phenotype /// 7219 // Notch signaling pathway // inferred from genetic interaction /// 19538 // protein metabolism // inferred from electronic annotation /// 7422 // peripheral nervous system development // traceable author …	16222 // procollagen-proline, 2-oxoglutarate-4-dioxygenase complex // Unknown /// 5737 // cytoplasm // inferred from direct assay /// 5886 // plasma membrane // inferred from direct assay /// 16222 // procollagen-proline, 2-oxoglutarate-4-dioxygenase complex // inferred from curator	IPR005123 // 2OG-Fe(II) oxygenase superfamily // 2.4E-17
7644	148843_at	0.577402	0.365144	7.80631	7.49e-09	1.16e-07	9.76937	FBgn0036563	CG13075	CG13075	CG13075	39756	---	---	---	---
6777	147976_at	0.585692	1.52161	7.8026	7.56e-09	1.17e-07	9.75926	FBgn0035218	CG9173	CG9173	CG9173	38165	---	---	---	---
4359	145558_at	0.562921	0.355576	7.79909	7.63e-09	1.18e-07	9.74969	FBgn0031304	CG4552	CG4552	CG4552	33289	---	---	---	IPR000195 // RabGAP/TBC domain // 3.1E-4
1886	143085_at	0.501459	0.611297	7.77612	8.12e-09	1.25e-07	9.68709	FBgn0000182	CG4824	BicC	Bicaudal C	34946	3729 // mRNA binding // inferred from sequence or structural similarity /// 3729 // mRNA binding // non-traceable author statement /// 3729 // mRNA binding // traceable author statement /// 5515 // protein binding // inferred from physical interaction /// 3676 // nucleic acid binding // inferred from electronic annotation /// 3729 // mRNA binding // inferred from sequence similarity	7297 // follicle cell migration (sensu Insecta) // inferred from mutant phenotype /// 7319 // negative regulation of oskar mRNA translation // traceable author statement /// 9993 // oogenesis (sensu Insecta) // inferred from mutant phenotype /// 9993 // oogenesis (sensu Insecta) // non-traceable author statement /// 9993 // oogenesis (sensu Insecta) // traceable author statement	5887 // integral to plasma membrane // non-traceable author statement	IPR004087 // KH // 1.9E-12 /// IPR001660 // Sterile alpha motif SAM // 5.7E-16 /// IPR004087 // KH // 1.9E-12 /// IPR001660 // Sterile alpha motif SAM // 5.7E-16
4925	146124_at	0.607072	-0.0900747	7.77321	8.19e-09	1.26e-07	9.67913	FBgn0032184	CG13135	CG13135	CG13135	34345	---	---	---	---
6205	147404_at	0.572373	-0.0561695	7.76624	8.34e-09	1.28e-07	9.66013	---	---	---	---	---	---	---	---	---
12304	153503_at	0.568736	2.99368	7.75631	8.57e-09	1.32e-07	9.63302	FBgn0034654	CG10306	CG10306	CG10306	37475	3743 // translation initiation factor activity // inferred from sequence or structural similarity /// 5515 // protein binding // inferred from physical interaction /// 3743 // translation initiation factor activity // inferred from electronic annotation /// 3743 // translation initiation factor activity // inferred from sequence similarity	6413 // translational initiation // inferred from sequence or structural similarity /// 6412 // protein biosynthesis // inferred from electronic annotation /// 6413 // translational initiation // inferred from electronic annotation /// 6413 // translational initiation // inferred from sequence similarity	5634 // nucleus // inferred from electronic annotation /// 5852 // eukaryotic translation initiation factor 3 complex // inferred from sequence or structural similarity /// 5852 // eukaryotic translation initiation factor 3 complex // inferred from sequence similarity	IPR009374 // Eukaryotic translation initiation factor 3 subunit 11 // 1.0E-126
323	141522_at	0.429272	1.30359	7.74332	8.87e-09	1.36e-07	9.59756	FBgn0033310	CG8643	rgr	regular	35843	3700 // transcription factor activity // non-traceable author statement /// 8270 // zinc ion binding // inferred from electronic annotation /// 3676 // nucleic acid binding // inferred from electronic annotation /// 46872 // metal ion binding // inferred from electronic annotation /// 3677 // DNA binding // inferred from electronic annotation	6357 // regulation of transcription from RNA polymerase II promoter // inferred from electronic annotation /// 8283 // cell proliferation // inferred from electronic annotation /// 45449 // regulation of transcription // non-traceable author statement /// 6350 // transcription // inferred from electronic annotation /// 6355 // regulation of transcription, DNA-dependent // inferred from electronic…	5634 // nucleus // non-traceable author statement /// 5634 // nucleus // inferred from electronic annotation	IPR007087 // Zn-finger, C2H2 type // 4.5E-5 /// IPR007087 // Zn-finger, C2H2 type // 8.0E-6 /// IPR007087 // Zn-finger, C2H2 type // 1.8E-5 /// IPR007087 // Zn-finger, C2H2 type // 4.9E-5 /// IPR007087 // Zn-finger, C2H2 type // 3.4E-5 /// IPR007087 // Zn-finger, C2H2 type // 4.5E-5 /// IPR007087 // Zn-finger, C2H2 type // 8.0E-6 /// IPR007087 // Zn-finger, C2H2 type // 1.8E-5 /// IPR007087 // Zn…
3087	144286_at	0.779635	2.22918	7.72313	9.37e-09	1.43e-07	9.54239	FBgn0028881	CG4218	CG4218	CG4218	34848	---	---	---	---
3330	144529_at	0.533395	-0.198384	7.71307	9.63e-09	1.46e-07	9.51489	FBgn0029775	CG4136	CG4136	CG4136	31470	3677 // DNA binding // inferred from electronic annotation /// 3700 // transcription factor activity // inferred from electronic annotation /// 4879 // ligand-dependent nuclear receptor activity // inferred from electronic annotation /// 30528 // transcription regulator activity // inferred from electronic annotation /// 43565 // sequence-specific DNA binding // inferred from electronic annotation	6139 // nucleobase, nucleoside, nucleotide and nucleic acid metabolism // inferred from electronic annotation /// 6357 // regulation of transcription from RNA polymerase II promoter // inferred from electronic annotation /// 6366 // transcription from RNA polymerase II promoter // inferred from electronic annotation /// 6355 // regulation of transcription, DNA-dependent // inferred from electroni…	5634 // nucleus // inferred from electronic annotation	IPR001356 // Homeobox // 7.8E-30
6627	147826_at	0.694388	0.151939	7.7084	9.75e-09	1.48e-07	9.50212	FBgn0053519	CG33519	CG33519	CG33519	3346201	5524 // ATP binding // inferred from electronic annotation /// 4672 // protein kinase activity // inferred from electronic annotation	6468 // protein amino acid phosphorylation // inferred from electronic annotation	---	IPR003961 // Fibronectin, type III // 2.8E-8 /// IPR003961 // Fibronectin, type III // 9.2E-14 /// IPR000719 // Protein kinase // 1.9E-51 /// IPR000719 // Protein kinase // 9.3E-42 /// IPR007110 // Immunoglobulin-like // 3.2 /// IPR007110 // Immunoglobulin-like // 7.8E-5 /// IPR007110 // Immunoglobulin-like // 2.2E-5 /// IPR007110 // Immunoglobulin-like // 0.1 /// IPR007110 // Immunoglobulin-like…
7720	148919_at	0.68723	2.4248	7.70022	9.97e-09	1.51e-07	9.47974	FBgn0036669 /// FBgn0064442	CG13030	CG13030 /// DpseGA11985	CG13030 /// GA11985	39885	4842 // ubiquitin-protein ligase activity // inferred from electronic annotation /// 8270 // zinc ion binding // inferred from electronic annotation /// 16874 // ligase activity // inferred from sequence or structural similarity /// 5515 // protein binding // inferred from electronic annotation /// 16874 // ligase activity // inferred from electronic annotation /// 46872 // metal ion binding // i…	6511 // ubiquitin-dependent protein catabolism // inferred from sequence or structural similarity /// 7423 // sensory organ development // inferred from sequence or structural similarity /// 16567 // protein ubiquitination // inferred from electronic annotation /// 45676 // regulation of R7 differentiation // inferred from sequence or structural similarity /// 6511 // ubiquitin-dependent protein …	151 // ubiquitin ligase complex // inferred from electronic annotation /// 5634 // nucleus // inferred from sequence or structural similarity /// 5634 // nucleus // inferred from electronic annotation /// 5634 // nucleus // inferred from sequence similarity	IPR004162 // Seven in absentia protein family // 1.0E-126
1934	143133_at	0.540762	-0.0423219	7.69868	1e-08	1.52e-07	9.47553	FBgn0000499	CG18361	dsh	dishevelled	32078	5112 // Notch binding // non-traceable author statement /// 5515 // protein binding // inferred from electronic annotation /// 4871 // signal transducer activity // inferred from electronic annotation	1736 // establishment of planar polarity // traceable author statement /// 1737 // establishment of wing hair orientation // inferred from mutant phenotype /// 1745 // compound eye morphogenesis (sensu Endopterygota) // inferred from mutant phenotype /// 6928 // cell motility // inferred from mutant phenotype /// 7163 // establishment and/or maintenance of cell polarity // non-traceable author st…	5737 // cytoplasm // non-traceable author statement /// 5737 // cytoplasm // traceable author statement /// 5912 // adherens junction // traceable author statement /// 5622 // intracellular // inferred from electronic annotation	IPR001478 // PDZ/DHR/GLGF domain // 3.8E-24 /// IPR000591 // Pleckstrin putative G-protein interacting domain // 9.3E-29 /// IPR001158 // DIX domain // 4.6E-61 /// IPR003351 // Dishevelled protein // 4.7E-48 /// IPR001478 // PDZ/DHR/GLGF domain // 3.8E-24 /// IPR000591 // Pleckstrin putative G-protein interacting domain // 9.3E-29 /// IPR001158 // DIX domain // 1.7E-39 /// IPR003351 // Dishevelle…
11551	152750_at	0.733651	0.555855	7.69579	1.01e-08	1.53e-07	9.46762	FBgn0034937	CG16783	fzr2	fizzy-related 2	37808	---	74 // regulation of progression through cell cycle // inferred from electronic annotation /// 6508 // proteolysis // inferred from electronic annotation /// 7049 // cell cycle // inferred from electronic annotation /// 19538 // protein metabolism // inferred from electronic annotation /// 7067 // mitosis // inferred from electronic annotation /// 51301 // cell division // inferred from electronic…	16020 // membrane // inferred from electronic annotation	IPR001680 // G-protein beta WD-40 repeat // 0.0015 /// IPR001680 // G-protein beta WD-40 repeat // 2.2E-6 /// IPR001680 // G-protein beta WD-40 repeat // 1.9E-8 /// IPR001680 // G-protein beta WD-40 repeat // 0.0056 /// IPR001680 // G-protein beta WD-40 repeat // 1.4 /// IPR001680 // G-protein beta WD-40 repeat // 5.8E-8
8534	149733_at	0.781598	1.65775	7.69329	1.02e-08	1.53e-07	9.4608	FBgn0051361	CG31361	dpr17	dpr17	41470	---	7275 // development // inferred from electronic annotation	16020 // membrane // inferred from electronic annotation /// 16021 // integral to membrane // inferred from electronic annotation	IPR007110 // Immunoglobulin-like // 0.018 /// IPR007110 // Immunoglobulin-like // 2.5E-9 /// IPR007110 // Immunoglobulin-like // 0.018 /// IPR007110 // Immunoglobulin-like // 2.5E-9
5007	146206_at	0.609184	0.929937	7.69101	1.02e-08	1.54e-07	9.45455	FBgn0032314	CG7309	CG7309	CG7309	34509	5310 // dicarboxylic acid transporter activity // inferred from sequence or structural similarity /// 15142 // tricarboxylic acid transporter activity // inferred from sequence or structural similarity /// 15293 // symporter activity // inferred from sequence or structural similarity /// 15354 // polyspecific organic cation transporter activity // inferred from sequence or structural similarity /…	---	---	---
3256	144455_at	1.09998	-0.339023	7.68213	1.05e-08	1.57e-07	9.43022	FBgn0029681	CG15239	CG15239	CG15239	31343	---	---	---	---
1193	142392_at	0.836261	4.53527	7.67763	1.06e-08	1.59e-07	9.41791	FBgn0042189	CG17376	CG17376	CG17376	59227	---	---	---	---
7162	148361_at	0.588516	0.2203	7.67801	1.06e-08	1.59e-07	9.41894	FBgn0052369	CG32369	CG32369	CG32369	38873	4176 // ATP-dependent peptidase activity // inferred from electronic annotation /// 4553 // hydrolase activity, hydrolyzing O-glycosyl compounds // inferred from electronic annotation /// 4842 // ubiquitin-protein ligase activity // inferred from electronic annotation /// 8270 // zinc ion binding // inferred from electronic annotation /// 5488 // binding // inferred from electronic annotation ///…	5975 // carbohydrate metabolism // inferred from electronic annotation /// 6510 // ATP-dependent proteolysis // inferred from electronic annotation /// 16567 // protein ubiquitination // inferred from electronic annotation	151 // ubiquitin ligase complex // inferred from electronic annotation	IPR003111 // Peptidase S16, lon N-terminal // 1.0E-8 /// IPR001841 // Zn-finger, RING // 2.6E-9
12625	153824_at	0.655207	1.30291	7.67681	1.06e-08	1.59e-07	9.41566	FBgn0000317	CG7595	ck	crinkled	34882	3774 // motor activity // inferred from sequence or structural similarity /// 3779 // actin binding // inferred from sequence or structural similarity /// 5200 // structural constituent of cytoskeleton // inferred from electronic annotation /// 5215 // transporter activity // inferred from electronic annotation /// 5524 // ATP binding // inferred from electronic annotation /// 42623 // ATPase act…	6886 // intracellular protein transport // inferred from electronic annotation /// 7469 // antennal development // inferred from mutant phenotype /// 7601 // visual perception // inferred from electronic annotation /// 7605 // sensory perception of sound // inferred from electronic annotation /// 16192 // vesicle-mediated transport // inferred from electronic annotation	16459 // myosin // inferred from sequence or structural similarity /// 16461 // unconventional myosin // inferred from sequence or structural similarity /// 5856 // cytoskeleton // inferred from electronic annotation /// 16459 // myosin // inferred from electronic annotation /// 16459 // myosin // inferred from sequence similarity /// 16461 // unconventional myosin // inferred from sequence simil…	IPR000857 // Core domain in kinesin and myosin motor // 6.3E-54 /// IPR000857 // Core domain in kinesin and myosin motor // 7.3E-42 /// IPR001609 // Myosin head (motor domain) // 1.0E-126 /// IPR000048 // IQ calmodulin-binding region // 4.5E-6 /// IPR000048 // IQ calmodulin-binding region // 7.5E-5 /// IPR000048 // IQ calmodulin-binding region // 1.8E-5
8100	149299_at	0.782442	0.845846	7.65719	1.12e-08	1.67e-07	9.36191	FBgn0037283	CG14658	CG14658	CG14658	40603	5515 // protein binding // inferred from physical interaction	---	---	---
9136	150335_at	1.35457	0.904604	7.64984	1.14e-08	1.7e-07	9.34178	FBgn0038914	CG17820	fit	female-specific independent of transformer	42578	---	---	---	---
1318	142517_at	0.766982	1.5032	7.63694	1.18e-08	1.76e-07	9.3064	FBgn0035128	CG1225	RhoGEF3	RhoGEF3	38053	4871 // signal transducer activity // non-traceable author statement /// 5089 // Rho guanyl-nucleotide exchange factor activity // non-traceable author statement	7165 // signal transduction // inferred from electronic annotation	---	IPR001452 // SH3 // 1.8E-6 /// IPR000219 // DH domain // 1.5E-27 /// IPR001452 // SH3 // 1.8E-6 /// IPR000219 // DH domain // 1.5E-27 /// IPR001452 // SH3 // 1.8E-6 /// IPR000219 // DH domain // 1.5E-27 /// IPR001452 // SH3 // 1.8E-6 /// IPR000219 // DH domain // 1.5E-27 /// IPR001452 // SH3 // 1.8E-6 /// IPR000219 // DH domain // 1.5E-27
7324	148523_at	0.579323	0.639631	7.635	1.19e-08	1.76e-07	9.30106	FBgn0052062	CG32062	CG32062	CG32062	39198	3729 // mRNA binding // inferred from sequence or structural similarity /// 166 // nucleotide binding // inferred from electronic annotation /// 3676 // nucleic acid binding // inferred from electronic annotation /// 3729 // mRNA binding // inferred from sequence similarity	---	---	IPR000504 // RNA-binding region RNP-1 (RNA recognition motif) // 4.8E-20 /// IPR000504 // RNA-binding region RNP-1 (RNA recognition motif) // 4.8E-20
3904	145103_at	0.671577	1.09115	7.62933	1.21e-08	1.79e-07	9.28551	FBgn0030614	CG9072	CG9072	CG9072	32443	5515 // protein binding // inferred from physical interaction /// 51082 // unfolded protein binding // inferred from electronic annotation	7022 // chaperonin-mediated tubulin folding // inferred from electronic annotation	---	IPR004226 // Tubulin binding cofactor A // 1.6E-47
56	141255_at	0.716985	2.20951	7.6258	1.22e-08	1.8e-07	9.27582	FBgn0029174	CG4535	FKBP59	FK506-binding protein FKBP59	47762	3755 // peptidyl-prolyl cis-trans isomerase activity // inferred from sequence or structural similarity /// 5515 // protein binding // inferred from physical interaction /// 5528 // FK506 binding // inferred from sequence or structural similarity /// 3755 // peptidyl-prolyl cis-trans isomerase activity // inferred from electronic annotation /// 5488 // binding // inferred from electronic annotati…	6457 // protein folding // inferred from electronic annotation /// 6816 // calcium ion transport // inferred from direct assay /// 7422 // peripheral nervous system development // traceable author statement /// 50908 // detection of light stimulus during visual perception // inferred from physical interaction /// 7601 // visual perception // inferred from electronic annotation /// 50896 // respon…	16027 // inaD signaling complex // inferred from physical interaction	IPR001179 // Peptidylprolyl isomerase, FKBP-type // 6.5E-46 /// IPR001179 // Peptidylprolyl isomerase, FKBP-type // 7.0E-24 /// IPR001440 // TPR repeat // 0.0010 /// IPR001440 // TPR repeat // 0.0012 /// IPR001440 // TPR repeat // 1.9E-9
3060	144259_at	0.583077	1.4451	7.6188	1.24e-08	1.83e-07	9.25662	FBgn0028847	CG9014	CG9014	CG9014	34777	4553 // hydrolase activity, hydrolyzing O-glycosyl compounds // inferred from electronic annotation /// 4842 // ubiquitin-protein ligase activity // inferred from electronic annotation /// 8270 // zinc ion binding // inferred from electronic annotation /// 5515 // protein binding // inferred from physical interaction /// 5515 // protein binding // inferred from electronic annotation /// 46872 // …	5975 // carbohydrate metabolism // inferred from electronic annotation /// 16567 // protein ubiquitination // inferred from electronic annotation	151 // ubiquitin ligase complex // inferred from electronic annotation	IPR001841 // Zn-finger, RING // 1.4E-12
13161	154360_at	0.420898	0.326669	7.61575	1.25e-08	1.84e-07	9.24824	FBgn0029824	CG3726	CG3726	CG3726	31525	3677 // DNA binding // non-traceable author statement /// 3700 // transcription factor activity // inferred from electronic annotation /// 5515 // protein binding // inferred from electronic annotation /// 30528 // transcription regulator activity // inferred from electronic annotation /// 3677 // DNA binding // inferred from electronic annotation	6357 // regulation of transcription from RNA polymerase II promoter // inferred from electronic annotation /// 7530 // sex determination // inferred from electronic annotation /// 19226 // transmission of nerve impulse // inferred from electronic annotation /// 6355 // regulation of transcription, DNA-dependent // inferred from electronic annotation	5634 // nucleus // inferred from electronic annotation	IPR000210 // BTB/POZ domain // 7.3E-27 /// IPR007889 // Helix-turn-helix, Psq // 3.5E-9
3450	144649_at	0.606829	1.35833	7.60583	1.29e-08	1.88e-07	9.22102	FBgn0029949	CG15035	CG15035	CG15035	31673	3824 // catalytic activity // inferred from electronic annotation	---	---	---
3538	144737_at	0.485394	0.395592	7.60325	1.3e-08	1.89e-07	9.21391	FBgn0030104	CG15368	CG15368	CG15368	31861	---	---	---	IPR000058 // Zn-finger, AN1-like // 5.7E-17
5262	146461_at	1.0263	2.15228	7.58983	1.35e-08	1.96e-07	9.17705	FBgn0032726	CG10621	CG10621	CG10621	35152	8898 // homocysteine S-methyltransferase activity // inferred from electronic annotation /// 16205 // selenocysteine methyltransferase activity // inferred from sequence or structural similarity /// 16205 // selenocysteine methyltransferase activity // inferred from sequence similarity	8652 // amino acid biosynthesis // inferred from electronic annotation	---	IPR003726 // Homocysteine S-methyltransferase // 3.7E-61
9573	150772_at	0.561588	0.384573	7.58808	1.35e-08	1.97e-07	9.17226	FBgn0039579	CG14065	CG14065	CG14065	43372	---	---	---	---
3475	144674_at	0.490298	0.555799	7.58559	1.36e-08	1.98e-07	9.16539	FBgn0029993	CG1571	CG1571	CG1571	31725	3774 // motor activity // inferred from sequence or structural similarity /// 5200 // structural constituent of cytoskeleton // inferred from electronic annotation /// 42623 // ATPase activity, coupled // inferred from sequence or structural similarity /// 3774 // motor activity // inferred from sequence similarity /// 42623 // ATPase activity, coupled // inferred from sequence similarity	7018 // microtubule-based movement // inferred from sequence or structural similarity /// 7018 // microtubule-based movement // inferred from sequence similarity	5868 // cytoplasmic dynein complex // inferred from sequence or structural similarity /// 5875 // microtubule associated complex // inferred from sequence or structural similarity /// 30286 // dynein complex // inferred from sequence or structural similarity /// 5868 // cytoplasmic dynein complex // inferred from sequence similarity /// 5875 // microtubule associated complex // inferred from sequ…	IPR001680 // G-protein beta WD-40 repeat // 1.5E-4
5101	146300_at	0.41925	1.24022	7.58491	1.36e-08	1.98e-07	9.16352	FBgn0032457	CG15483	CG15483	CG15483	34687	8532 // N-acetyllactosaminide beta-1,3-N-acetylglucosaminyltransferase activity // inferred from sequence or structural similarity /// 8532 // N-acetyllactosaminide beta-1,3-N-acetylglucosaminyltransferase activity // inferred from sequence similarity	---	---	---
8434	149633_at	0.76113	2.23606	7.58325	1.37e-08	1.99e-07	9.15896	FBgn0037819	CG14688	CG14688	CG14688	41275	---	---	---	IPR008775 // Phytanoyl-CoA dioxygenase // 4.5E-90
12892	154091_at	0.60362	3.66565	7.57779	1.39e-08	2.01e-07	9.14396	FBgn0031836	CG11050	CG11050	CG11050	33924	---	---	---	IPR006674 // Metal-dependent phosphohydrolase, HD subdomain // 1.2E-9
11795	152994_at	0.669892	0.721795	7.5604	1.46e-08	2.1e-07	9.09612	FBgn0034687	CG11475	CG11475	CG11475	37513	---	---	---	IPR002791 // Protein of unknown function DUF89 // 1.0E-126
90	141289_at	1.27701	1.17441	7.55631	1.47e-08	2.12e-07	9.08488	FBgn0037636	CG9821	CG9821	CG9821	41058	5515 // protein binding // inferred from physical interaction	---	---	---
1993	143192_at	1.34947	2.24348	7.53386	1.57e-08	2.25e-07	9.02307	FBgn0001217	CG7756	Hsc70-2	Heat shock protein cognate 2	41609	5524 // ATP binding // inferred from electronic annotation /// 16787 // hydrolase activity // inferred from electronic annotation /// 51082 // unfolded protein binding // inferred from sequence or structural similarity /// 166 // nucleotide binding // inferred from electronic annotation /// 51082 // unfolded protein binding // inferred from sequence similarity	6457 // protein folding // inferred from electronic annotation /// 6457 // protein folding // inferred from sequence or structural similarity /// 6461 // protein complex assembly // inferred from electronic annotation /// 6952 // defense response // inferred from electronic annotation /// 9408 // response to heat // non-traceable author statement /// 6457 // protein folding // inferred from seque…	5739 // mitochondrion // inferred from sequence or structural similarity /// 5739 // mitochondrion // inferred from sequence similarity	IPR001023 // Heat shock protein Hsp70 // 1.0E-126
7831	149030_at	0.619305	0.291451	7.51804	1.64e-08	2.34e-07	8.97949	FBgn0036844	CG14080	Mkp3	Mitogen-activated protein kinase phosphatase 3	40081	8138 // protein tyrosine/serine/threonine phosphatase activity // inferred from sequence or structural similarity /// 8138 // protein tyrosine/serine/threonine phosphatase activity // non-traceable author statement /// 16791 // phosphoric monoester hydrolase activity // inferred from direct assay /// 17017 // MAP kinase phosphatase activity // inferred from sequence or structural similarity /// 1…	165 // MAPKKK cascade // inferred from electronic annotation /// 6096 // glycolysis // inferred from electronic annotation /// 6470 // protein amino acid dephosphorylation // inferred from direct assay /// 6470 // protein amino acid dephosphorylation // non-traceable author statement /// 6470 // protein amino acid dephosphorylation // inferred from electronic annotation	5737 // cytoplasm // inferred from direct assay	IPR001763 // Rhodanese-like // 1.5E-9 /// IPR000340 // Dual specificity protein phosphatase // 1.2E-58
3172	144371_at	0.517866	1.28803	7.513	1.66e-08	2.36e-07	8.96559	FBgn0040362	CG11379	CG11379	CG11379	31062	5515 // protein binding // inferred from physical interaction	---	---	---
10158	151357_at	0.403352	-0.102202	7.51155	1.67e-08	2.37e-07	8.9616	FBgn0052542	CG32542	CG32542	CG32542	32883	---	---	---	IPR007527 // SWIM Zn-finger // 1.4E-8
11568	152767_at	0.752249	1.252	7.51051	1.67e-08	2.37e-07	8.95873	FBgn0040600	CG13631	CG13631	CG13631	50073	5515 // protein binding // inferred from physical interaction	---	---	---
1702	142901_at	0.547175	0.331901	7.50436	1.7e-08	2.41e-07	8.94178	FBgn0037884	CG17184	CG17184	CG17184	41353	5083 // small GTPase regulator activity // inferred from electronic annotation	6928 // cell motility // inferred from electronic annotation /// 7010 // cytoskeleton organization and biogenesis // inferred from electronic annotation	---	IPR010504 // Arfaptin-like // 1.5E-126
8360	149559_at	0.830991	1.16382	7.50106	1.71e-08	2.43e-07	8.93268	FBgn0026188	CG8144	ps	pasilla	44258	3729 // mRNA binding // inferred from sequence or structural similarity /// 5515 // protein binding // inferred from physical interaction /// 3676 // nucleic acid binding // inferred from electronic annotation /// 3729 // mRNA binding // inferred from sequence similarity	398 // nuclear mRNA splicing, via spliceosome // inferred from electronic annotation /// 398 // nuclear mRNA splicing, via spliceosome // inferred from expression pattern	5634 // nucleus // inferred from direct assay	IPR004087 // KH // 7.1E-15 /// IPR004087 // KH // 6.9E-10 /// IPR004087 // KH // 7.1E-15 /// IPR004087 // KH // 6.9E-10 /// IPR004087 // KH // 6.5E-9 /// IPR004087 // KH // 7.1E-15 /// IPR004087 // KH // 6.9E-10 /// IPR004087 // KH // 6.5E-9 /// IPR004087 // KH // 7.1E-15 /// IPR004087 // KH // 6.9E-10 /// IPR004087 // KH // 6.5E-9 /// IPR004087 // KH // 6.5E-9
11508	152707_at	0.466973	1.91169	7.49176	1.76e-08	2.49e-07	8.90702	FBgn0034655	CG10307	CG10307	CG10307	37477	4672 // protein kinase activity // inferred from electronic annotation /// 4675 // transmembrane receptor protein serine/threonine kinase activity // inferred from electronic annotation /// 4872 // receptor activity // inferred from electronic annotation /// 5198 // structural molecule activity // inferred from electronic annotation /// 16301 // kinase activity // inferred from electronic annotat…	6464 // protein modification // inferred from electronic annotation /// 6468 // protein amino acid phosphorylation // inferred from electronic annotation /// 6952 // defense response // inferred from electronic annotation /// 7154 // cell communication // inferred from electronic annotation /// 7165 // signal transduction // inferred from electronic annotation /// 7166 // cell surface receptor li…	---	IPR001611 // Leucine-rich repeat // 0.068 /// IPR001611 // Leucine-rich repeat // 0.18 /// IPR001611 // Leucine-rich repeat // 1.3E-4 /// IPR001611 // Leucine-rich repeat // 0.0090 /// IPR001611 // Leucine-rich repeat // 0.025
3401	144600_at	0.60364	1.54844	7.48409	1.8e-08	2.53e-07	8.88586	FBgn0029877	CG17717	CG17717	CG17717	31592	5515 // protein binding // inferred from electronic annotation /// 8270 // zinc ion binding // inferred from electronic annotation /// 46872 // metal ion binding // inferred from electronic annotation	6512 // ubiquitin cycle // inferred from electronic annotation	5634 // nucleus // inferred from electronic annotation	IPR001841 // Zn-finger, RING // 6.9E-20 /// IPR001841 // Zn-finger, RING // 8.5E-11
3795	144994_at	0.653399	1.94971	7.48381	1.8e-08	2.53e-07	8.8851	FBgn0030462	CG15742	CG15742	CG15742	32276	---	---	---	---
4976	146175_at	1.1013	3.82536	7.48336	1.8e-08	2.53e-07	8.88384	FBgn0032275	CG17097	CG17097	CG17097	34461	4806 // triacylglycerol lipase activity // inferred from sequence or structural similarity /// 16298 // lipase activity // inferred from sequence or structural similarity /// 3824 // catalytic activity // inferred from electronic annotation /// 16787 // hydrolase activity // inferred from electronic annotation /// 16789 // carboxylic ester hydrolase activity // inferred from electronic annotation…	6629 // lipid metabolism // inferred from electronic annotation /// 6629 // lipid metabolism // inferred from sequence or structural similarity /// 16042 // lipid catabolism // inferred from electronic annotation /// 6629 // lipid metabolism // inferred from sequence similarity	---	IPR006693 // Ab-hydrolase associated lipase region // 7.9E-24 /// IPR006693 // Ab-hydrolase associated lipase region // 7.9E-24
13450	154649_at	0.769874	1.41116	7.4827	1.8e-08	2.53e-07	8.88202	FBgn0039631	CG11305	Sirt7	Sirt7	43433	3676 // nucleic acid binding // inferred from electronic annotation /// 3682 // chromatin binding // inferred from electronic annotation /// 16787 // hydrolase activity // inferred from electronic annotation /// 19213 // deacetylase activity // inferred from electronic annotation /// 30528 // transcription regulator activity // inferred from electronic annotation /// 3677 // DNA binding // inferr…	6139 // nucleobase, nucleoside, nucleotide and nucleic acid metabolism // inferred from electronic annotation /// 6333 // chromatin assembly or disassembly // inferred from electronic annotation /// 6342 // chromatin silencing // inferred from electronic annotation /// 6355 // regulation of transcription, DNA-dependent // inferred from electronic annotation	5677 // chromatin silencing complex // inferred from electronic annotation	IPR003000 // Silent information regulator protein Sir2 // 7.8E-7
11400	152599_at	0.744303	1.33885	7.47375	1.85e-08	2.59e-07	8.85732	FBgn0013988	CG18255	Strn-Mlck	Stretchin-Mlck	36753	4674 // protein serine/threonine kinase activity // non-traceable author statement /// 4685 // calcium- and calmodulin-dependent protein kinase activity // inferred from direct assay /// 4687 // myosin light chain kinase activity // inferred from direct assay /// 4687 // myosin light chain kinase activity // inferred from sequence or structural similarity /// 5021 // vascular endothelial growth f…	910 // cytokinesis // inferred from electronic annotation /// 6468 // protein amino acid phosphorylation // inferred from sequence or structural similarity /// 6468 // protein amino acid phosphorylation // non-traceable author statement /// 7059 // chromosome segregation // inferred from electronic annotation /// 7067 // mitosis // inferred from electronic annotation /// 7498 // mesoderm developm…	16020 // membrane // inferred from electronic annotation	IPR007110 // Immunoglobulin-like // 9.5E-8 /// IPR003961 // Fibronectin, type III // 5.9E-8 /// IPR003961 // Fibronectin, type III // 2.2E-12 /// IPR000719 // Protein kinase // 1.8E-80 /// IPR007110 // Immunoglobulin-like // 1.1E-6 /// IPR007110 // Immunoglobulin-like // 0.04 /// IPR007110 // Immunoglobulin-like // 0.02 /// IPR007110 // Immunoglobulin-like // 1.3 /// IPR007110 // Immunoglobulin-l…
12914	154113_at	0.655999	1.15326	7.46308	1.9e-08	2.66e-07	8.82785	FBgn0031947	CG7154	CG7154	CG7154	34062	3677 // DNA binding // inferred from sequence or structural similarity /// 3682 // chromatin binding // inferred from electronic annotation /// 3677 // DNA binding // inferred from sequence similarity	---	5634 // nucleus // inferred from sequence or structural similarity /// 5634 // nucleus // inferred from sequence similarity	IPR001487 // Bromodomain // 4.7E-26
5183	146382_at	0.619065	0.809652	7.45594	1.94e-08	2.7e-07	8.80813	FBgn0032609	CG13280	CG13280	CG13280	35015	16491 // oxidoreductase activity // inferred from electronic annotation	6118 // electron transport // inferred from electronic annotation /// 8152 // metabolism // inferred from electronic annotation	---	IPR000683 // Oxidoreductase, N-terminal // 2.9E-24
9941	151140_at	0.726398	2.22446	7.4542	1.95e-08	2.71e-07	8.80334	FBgn0050222	CG30222	CG30222	CG30222	50129	---	---	---	---
9350	150549_at	0.56101	1.65405	7.43726	2.04e-08	2.82e-07	8.75652	FBgn0039268	CG11819	CG11819	CG11819	43002	---	---	---	IPR010439 // Protein of unknown function DUF1041 // 1.2E-73 /// IPR000008 // C2 domain // 5.0E-19
11922	153121_at	0.579668	1.55627	7.43741	2.04e-08	2.82e-07	8.75692	FBgn0035829	CG8044	CG8044	CG8044	38887	---	---	---	---
11871	153070_at	0.731628	1.80427	7.43471	2.06e-08	2.84e-07	8.74948	FBgn0030179 /// FBgn0023479	CG4821 /// CG12094	CG12094 /// Tequila	CG12094 /// Tequila	31945 /// 39048	4252 // serine-type endopeptidase activity // inferred from sequence or structural similarity /// 4252 // serine-type endopeptidase activity // non-traceable author statement /// 4263 // chymotrypsin activity // inferred from electronic annotation /// 4295 // trypsin activity // non-traceable author statement /// 5044 // scavenger receptor activity // inferred from electronic annotation /// 5524 …	6030 // chitin metabolism // inferred from electronic annotation /// 6508 // proteolysis // non-traceable author statement /// 15986 // ATP synthesis coupled proton transport // inferred from electronic annotation /// 6508 // proteolysis // inferred from electronic annotation /// 7264 // small GTPase mediated signal transduction // inferred from electronic annotation	5576 // extracellular region // inferred from electronic annotation /// 16020 // membrane // inferred from electronic annotation /// 16469 // proton-transporting two-sector ATPase complex // inferred from electronic annotation /// 16021 // integral to membrane // inferred from electronic annotation	IPR001806 // Ras GTPase superfamily // 4.5E-14 /// IPR002557 // Chitin binding Peritrophin-A // 1.8E-19 /// IPR002557 // Chitin binding Peritrophin-A // 2.2E-21 /// IPR002557 // Chitin binding Peritrophin-A // 1.9E-7 /// IPR002557 // Chitin binding Peritrophin-A // 4.5E-6 /// IPR002557 // Chitin binding Peritrophin-A // 2.3E-8 /// IPR002557 // Chitin binding Peritrophin-A // 1.6E-7
9708	150907_at	0.705028	1.64904	7.43401	2.06e-08	2.84e-07	8.74755	FBgn0039796	CG12069	CG12069	CG12069	43643	4674 // protein serine/threonine kinase activity // non-traceable author statement /// 4702 // receptor signaling protein serine/threonine kinase activity // inferred from electronic annotation /// 5524 // ATP binding // inferred from electronic annotation /// 166 // nucleotide binding // inferred from electronic annotation /// 4672 // protein kinase activity // inferred from electronic annotatio…	6468 // protein amino acid phosphorylation // non-traceable author statement /// 6916 // anti-apoptosis // inferred from electronic annotation /// 7242 // intracellular signaling cascade // inferred from electronic annotation /// 19725 // cell homeostasis // inferred from electronic annotation /// 6468 // protein amino acid phosphorylation // inferred from electronic annotation	---	IPR000719 // Protein kinase // 1.4E-79 /// IPR000961 // Protein kinase C-terminal domain // 6.7E-7 /// IPR000719 // Protein kinase // 3.5E-33 /// IPR000961 // Protein kinase C-terminal domain // 6.7E-7
5182	146381_at	1.76921	1.03855	7.4304	2.08e-08	2.87e-07	8.73755	FBgn0004797	CG31991	mdy	midway	44887	3676 // nucleic acid binding // inferred from electronic annotation /// 4144 // diacylglycerol O-acyltransferase activity // inferred from direct assay /// 4144 // diacylglycerol O-acyltransferase activity // inferred from sequence or structural similarity /// 4144 // diacylglycerol O-acyltransferase activity // non-traceable author statement /// 4772 // sterol O-acyltransferase activity // infer…	6418 // tRNA aminoacylation for protein translation // inferred from electronic annotation /// 6422 // aspartyl-tRNA aminoacylation // inferred from electronic annotation /// 6430 // lysyl-tRNA aminoacylation // inferred from electronic annotation /// 8203 // cholesterol metabolism // inferred from electronic annotation /// 9993 // oogenesis (sensu Insecta) // inferred from mutant phenotype /// 1…	5737 // cytoplasm // inferred from electronic annotation	IPR004299 // Membrane bound O-acyl transferase, MBOAT // 9.4E-28 /// IPR004299 // Membrane bound O-acyl transferase, MBOAT // 9.4E-28
8628	149827_at	0.5813	0.606182	7.42999	2.08e-08	2.87e-07	8.73642	FBgn0038128	CG15889	Ravus	Ravus	41626	3677 // DNA binding // inferred from electronic annotation	---	790 // nuclear chromatin // inferred from direct assay	IPR004210 // BESS motif // 1.6E-13
305	141504_at	0.491194	1.73929	7.41793	2.15e-08	2.96e-07	8.70305	FBgn0001308	CG7765	Khc	Kinesin heavy chain	36810	3774 // motor activity // non-traceable author statement /// 3777 // microtubule motor activity // inferred from sequence or structural similarity /// 3777 // microtubule motor activity // non-traceable author statement /// 5200 // structural constituent of cytoskeleton // inferred from electronic annotation /// 5524 // ATP binding // inferred from electronic annotation /// 8017 // microtubule bi…	1754 // eye photoreceptor cell differentiation // inferred from genetic interaction /// 6605 // protein targeting // inferred from electronic annotation /// 7018 // microtubule-based movement // inferred from sequence or structural similarity /// 7018 // microtubule-based movement // non-traceable author statement /// 7269 // neurotransmitter secretion // non-traceable author statement /// 7303 /…	5871 // kinesin complex // inferred from direct assay /// 5871 // kinesin complex // inferred from sequence or structural similarity /// 5871 // kinesin complex // non-traceable author statement /// 5874 // microtubule // inferred from electronic annotation /// 5875 // microtubule associated complex // inferred from electronic annotation /// 5871 // kinesin complex // inferred from sequence simil…	IPR001752 // Kinesin, motor region // 1.0E-126
8261	149460_at	0.833262	0.849677	7.41381	2.18e-08	2.98e-07	8.69167	FBgn0051473	CG31473	CG31473	CG31473	318753	4733 // pyridoxamine-phosphate oxidase activity // inferred from sequence or structural similarity /// 4733 // pyridoxamine-phosphate oxidase activity // inferred from electronic annotation /// 10181 // FMN binding // inferred from electronic annotation /// 4733 // pyridoxamine-phosphate oxidase activity // inferred from sequence similarity	6732 // coenzyme metabolism // inferred from electronic annotation /// 7155 // cell adhesion // inferred from electronic annotation /// 7160 // cell-matrix adhesion // inferred from electronic annotation /// 8615 // pyridoxine biosynthesis // inferred from sequence or structural similarity /// 8615 // pyridoxine biosynthesis // inferred from electronic annotation /// 8615 // pyridoxine biosynthes…	8305 // integrin complex // inferred from electronic annotation	IPR000659 // Pyridoxamine 5-phosphate oxidase // 6.9E-22
6462	147661_at	0.490935	0.106311	7.39915	2.27e-08	3.1e-07	8.65107	FBgn0000008	CG6741	a	arc	43852	5515 // protein binding // inferred from electronic annotation /// 5515 // protein binding // inferred from physical interaction	7456 // eye development (sensu Endopterygota) // inferred from mutant phenotype	5912 // adherens junction // inferred from direct assay /// 5912 // adherens junction // non-traceable author statement /// 16324 // apical plasma membrane // inferred from direct assay	IPR001478 // PDZ/DHR/GLGF domain // 1.1E-4 /// IPR001478 // PDZ/DHR/GLGF domain // 1.5E-15
11123	152322_at	0.93863	3.21958	7.39349	2.3e-08	3.14e-07	8.63541	FBgn0035198	CG9130 /// CG9133	CG9133	CG9133	3772453	---	---	---	---
8914	150113_at	0.703488	1.96845	7.39294	2.31e-08	3.15e-07	8.63391	FBgn0038565	CG7794	CG7794	CG7794	42159	3924 // GTPase activity // inferred from electronic annotation /// 5200 // structural constituent of cytoskeleton // inferred from sequence or structural similarity /// 5525 // GTP binding // inferred from electronic annotation /// 15631 // tubulin binding // inferred from electronic annotation /// 166 // nucleotide binding // inferred from electronic annotation /// 5198 // structural molecule ac…	6886 // intracellular protein transport // inferred from electronic annotation /// 6928 // cell motility // inferred from electronic annotation /// 7010 // cytoskeleton organization and biogenesis // inferred from electronic annotation /// 7018 // microtubule-based movement // inferred from electronic annotation /// 7059 // chromosome segregation // inferred from electronic annotation /// 7067 //…	5874 // microtubule // inferred from sequence or structural similarity /// 45298 // tubulin // inferred from electronic annotation /// 5874 // microtubule // inferred from electronic annotation /// 43234 // protein complex // inferred from electronic annotation /// 5874 // microtubule // inferred from sequence similarity	IPR003008 // Tubulin/FtsZ, GTPase // 2.4E-75 /// IPR008280 // Tubulin/FtsZ, C-terminal // 1.0E-57
11338	152537_at	0.805107	1.60037	7.37571	2.42e-08	3.28e-07	8.58616	FBgn0031723	CG7251	CG7251	CG7251	33791	5515 // protein binding // inferred from physical interaction	---	---	---
7550	148749_at	0.594791	0.243714	7.36938	2.46e-08	3.33e-07	8.56862	FBgn0036424	CG9598	CG9598	CG9598	39583	5515 // protein binding // inferred from electronic annotation	---	---	IPR001478 // PDZ/DHR/GLGF domain // 1.3E-16 /// IPR001478 // PDZ/DHR/GLGF domain // 5.5E-8
7344	148543_at	0.817174	2.7901	7.3641	2.5e-08	3.38e-07	8.55398	FBgn0052081	CG32081	CG32081	CG32081	326194	5279 // amino acid-polyamine transporter activity // inferred from electronic annotation /// 15171 // amino acid transporter activity // inferred from sequence or structural similarity /// 15171 // amino acid transporter activity // inferred from sequence similarity	6520 // amino acid metabolism // inferred from electronic annotation /// 6810 // transport // inferred from sequence or structural similarity /// 6865 // amino acid transport // inferred from electronic annotation /// 6810 // transport // inferred from sequence similarity	16020 // membrane // inferred from electronic annotation	IPR002422 // Amino acid/polyamine transporter II // 4.2E-52 /// IPR002422 // Amino acid/polyamine transporter II // 2.2E-44
11863	153062_at	0.613943	1.72542	7.35967	2.53e-08	3.41e-07	8.54171	FBgn0031240	CG3345	CG3345	CG3345	33192	3677 // DNA binding // inferred from electronic annotation	---	---	---
5876	147075_at	0.935237	2.59278	7.35682	2.55e-08	3.43e-07	8.53379	FBgn0061197	CG13164	SIP2	Syntaxin Interacting Protein 2	36332	---	---	---	IPR001646 // Pentapeptide repeat // 6.4E-9
7700	148899_at	0.404085	0.042397	7.35237	2.58e-08	3.47e-07	8.52147	FBgn0036637	CG12436	CG12436	CG12436	39838	---	---	---	---
13003	154202_at	0.628976	1.42859	7.31824	2.83e-08	3.79e-07	8.42675	FBgn0039743	CG7946	CG7946	CG7946	43576	5515 // protein binding // inferred from physical interaction	---	---	IPR000313 // PWWP domain // 8.2E-18
2015	143214_at	0.422934	0.297178	7.31251	2.88e-08	3.84e-07	8.41084	FBgn0001965	CG7793	Sos	Son of sevenless	34790	3677 // DNA binding // inferred from electronic annotation /// 5088 // Ras guanyl-nucleotide exchange factor activity // inferred from sequence or structural similarity /// 5088 // Ras guanyl-nucleotide exchange factor activity // non-traceable author statement /// 5515 // protein binding // inferred from physical interaction /// 5085 // guanyl-nucleotide exchange factor activity // inferred from…	6334 // nucleosome assembly // inferred from electronic annotation /// 7001 // chromosome organization and biogenesis (sensu Eukaryota) // inferred from electronic annotation /// 7015 // actin filament organization // inferred from mutant phenotype /// 7186 // G-protein coupled receptor protein signaling pathway // inferred from electronic annotation /// 7265 // Ras protein signal transduction //…	786 // nucleosome // inferred from electronic annotation /// 5634 // nucleus // inferred from electronic annotation	IPR001895 // Guanine-nucleotide dissociation stimulator CDC25 // 4.1E-95 /// IPR000651 // Guanine nucleotide exchange factor for Ras-like GTPases; N-terminal motif // 5.7E-27 /// IPR001849 // Pleckstrin-like // 4.6E-18 /// IPR000219 // DH domain // 5.2E-70
1613	142812_at	0.553242	0.308208	7.31206	2.88e-08	3.84e-07	8.40958	FBgn0035142	CG17090	CG17090	CG17090	38070	4672 // protein kinase activity // non-traceable author statement /// 4674 // protein serine/threonine kinase activity // inferred from sequence or structural similarity /// 4702 // receptor signaling protein serine/threonine kinase activity // inferred from electronic annotation /// 5524 // ATP binding // inferred from electronic annotation /// 166 // nucleotide binding // inferred from electron…	6468 // protein amino acid phosphorylation // non-traceable author statement /// 6917 // induction of apoptosis // inferred from electronic annotation /// 7398 // ectoderm development // inferred from electronic annotation /// 7399 // nervous system development // inferred from electronic annotation /// 8283 // cell proliferation // inferred from electronic annotation /// 6468 // protein amino ac…	---	IPR000719 // Protein kinase // 7.7E-64
12326	153525_at	0.643917	2.24449	7.31153	2.88e-08	3.84e-07	8.40812	FBgn0036741	CG7510	CG7510	CG7510	39965	---	7242 // intracellular signaling cascade // inferred from electronic annotation	16021 // integral to membrane // inferred from electronic annotation	IPR000591 // Pleckstrin putative G-protein interacting domain // 3.9E-22 /// IPR004776 // Auxin Efflux Carrier // 8.6E-13 /// IPR000591 // Pleckstrin putative G-protein interacting domain // 3.9E-22
3541	144740_at	0.41842	-0.346783	7.30925	2.9e-08	3.87e-07	8.40177	FBgn0030107	CG15370	CG15370	CG15370	31864	---	---	---	---
4506	145705_at	0.874235	0.219356	7.30464	2.94e-08	3.91e-07	8.38898	FBgn0031527	CG3304	CG3304	CG3304	33552	---	---	---	IPR004182 // GRAM domain // 7.9E-28
225	141424_at	0.875092	1.51013	7.29958	2.98e-08	3.96e-07	8.37491	FBgn0035776	CG8564	CG8564	CG8564	38825	4181 // metallocarboxypeptidase activity // inferred from sequence or structural similarity /// 4182 // carboxypeptidase A activity // inferred from electronic annotation /// 4181 // metallocarboxypeptidase activity // inferred from sequence similarity	6508 // proteolysis // inferred from electronic annotation	---	IPR000834 // Peptidase M14, carboxypeptidase A // 2.4E-49
6407	147606_at	0.918045	1.30789	7.29837	2.99e-08	3.97e-07	8.37157	FBgn0034601	CG4286	CG4286	CG4286	37416	---	---	---	---
10832	152031_at	1.14788	2.47829	7.29452	3.02e-08	4.01e-07	8.36086	FBgn0011244	CG2830	Hsp60B	Heat shock protein 60 related	48572	5524 // ATP binding // inferred from electronic annotation /// 42623 // ATPase activity, coupled // inferred from sequence or structural similarity /// 51082 // unfolded protein binding // inferred from sequence or structural similarity /// 166 // nucleotide binding // inferred from electronic annotation /// 5515 // protein binding // inferred from electronic annotation /// 51082 // unfolded prot…	6457 // protein folding // inferred from sequence or structural similarity /// 6458 // 'de novo' protein folding // inferred from sequence or structural similarity /// 6626 // protein targeting to mitochondrion // inferred from sequence or structural similarity /// 7286 // spermatid development // inferred from mutant phenotype /// 9408 // response to heat // inferred from sequence or structural …	5739 // mitochondrion // inferred from sequence or structural similarity /// 5759 // mitochondrial matrix // inferred from sequence or structural similarity /// 5739 // mitochondrion // inferred from sequence similarity /// 5759 // mitochondrial matrix // inferred from sequence similarity	IPR002423 // Chaperonin Cpn60/TCP-1 // 1.0E-126
6766	147965_at	0.890332	2.39643	7.29294	3.04e-08	4.02e-07	8.35647	FBgn0035196	CG9129	CG9129	CG9129	38138	---	---	---	---
4977	146176_at	0.838191	0.658268	7.29192	3.04e-08	4.03e-07	8.35363	FBgn0032276	CG17098	CG17098	CG17098	34462	3676 // nucleic acid binding // inferred from electronic annotation /// 8270 // zinc ion binding // inferred from electronic annotation	---	5634 // nucleus // inferred from electronic annotation	---
5189	146388_at	1.13873	2.25746	7.29072	3.05e-08	4.04e-07	8.35031	FBgn0051781	CG31781	CG31781	CG31781	35023	---	---	---	---
9718	150917_at	0.45359	0.27779	7.28393	3.11e-08	4.11e-07	8.33141	FBgn0039810	CG15549	CG15549	CG15549	43665	---	---	---	---
7221	148420_at	0.594451	1.01396	7.27651	3.18e-08	4.18e-07	8.3108	FBgn0035923	CG6511	CG6511	CG6511	38997	---	---	---	---
4519	145718_at	0.38247	0.947478	7.2738	3.2e-08	4.21e-07	8.30324	FBgn0031546	CG8851	CG8851	CG8851	33575	---	---	---	---
7286	148485_at	0.716459	0.95891	7.2432	3.48e-08	4.54e-07	8.21809	FBgn0036032	CG16711	CG16711	CG16711	39135	---	---	---	---
3625	144824_at	0.938266	1.32455	7.23365	3.58e-08	4.65e-07	8.19151	FBgn0030228	CG1826	CG1826	CG1826	32000	3779 // actin binding // inferred from electronic annotation /// 5200 // structural constituent of cytoskeleton // inferred from electronic annotation /// 5515 // protein binding // inferred from electronic annotation	---	---	IPR000210 // BTB/POZ domain // 7.3E-24
4211	145410_at	0.8474	1.00417	7.23238	3.59e-08	4.66e-07	8.18797	FBgn0031085	CG9570	CG9570	CG9570	33009	---	---	---	---
5246	146445_at	0.532912	1.4938	7.23176	3.59e-08	4.66e-07	8.18623	FBgn0032700	CG10338	CG10338	CG10338	35124	---	---	---	IPR006968 // Protein of unknown function DUF647 // 1.7E-83
6210	147409_at	0.557361	0.488998	7.22755	3.64e-08	4.71e-07	8.1745	FBgn0034294	CG5765	CG5765	CG5765	37057	---	---	---	IPR007931 // Protein of unknown function DUF725 // 2.3E-72
1213	142412_at	0.405693	-0.269571	7.21759	3.74e-08	4.83e-07	8.14676	FBgn0030017	CG2278	CG2278	CG2278	31751	---	---	---	---
13970	AFFX-BioC-3_at	0.970532	1.60191	7.2081	3.84e-08	4.94e-07	8.1203	---	---	---	---	---	4015 // adenosylmethionine-8-amino-7-oxononanoate transaminase activity // inferred from electronic annotation /// 8483 // transaminase activity // inferred from electronic annotation /// 16740 // transferase activity // inferred from electronic annotation /// 30170 // pyridoxal phosphate binding // inferred from electronic annotation /// 3824 // catalytic activity // inferred from electronic ann…	9102 // biotin biosynthesis // inferred from electronic annotation /// 8152 // metabolism // inferred from electronic annotation /// 9058 // biosynthesis // inferred from electronic annotation /// 9236 // cobalamin biosynthesis // inferred from electronic annotation	---	---
6183	147382_at	0.598049	1.03417	7.1984	3.94e-08	5.06e-07	8.09327	FBgn0029006	CG4943	lack	lethal with a checkpoint kinase	36999	4842 // ubiquitin-protein ligase activity // inferred from sequence or structural similarity /// 4842 // ubiquitin-protein ligase activity // non-traceable author statement /// 5515 // protein binding // inferred from physical interaction /// 5506 // iron ion binding // inferred from electronic annotation /// 8137 // NADH dehydrogenase (ubiquinone) activity // inferred from electronic annotation …	6508 // proteolysis // inferred from electronic annotation /// 6512 // ubiquitin cycle // non-traceable author statement /// 7179 // transforming growth factor beta receptor signaling pathway // inferred from genetic interaction /// 1700 // embryonic development (sensu Insecta) // inferred from mutant phenotype /// 8101 // decapentaplegic receptor signaling pathway // inferred from mutant phenoty…	5622 // intracellular // inferred from electronic annotation /// 151 // ubiquitin ligase complex // inferred from sequence or structural similarity	IPR001202 // WW/Rsp5/WWP domain // 3.9E-16 /// IPR001202 // WW/Rsp5/WWP domain // 3.7E-11 /// IPR001202 // WW/Rsp5/WWP domain // 6.9E-15 /// IPR000569 // HECT domain (Ubiquitin-protein ligase) // 7.1E-117 /// IPR000008 // C2 domain // 6.4E-21
11981	153180_at	0.629288	1.95913	7.19605	3.97e-08	5.09e-07	8.08672	FBgn0036534	CG6169	CG6169	CG6169	39722	---	---	---	IPR007722 // Dcp2, box A // 1.6E-24 /// IPR000086 // NUDIX hydrolase // 1.2E-14 /// IPR007722 // Dcp2, box A // 5.0E-38 /// IPR000086 // NUDIX hydrolase // 2.0E-7 /// IPR007722 // Dcp2, box A // 5.0E-38 /// IPR000086 // NUDIX hydrolase // 1.2E-14
8961	150160_at	0.417836	0.294007	7.19516	3.98e-08	5.1e-07	8.08424	FBgn0038646	CG7715	CG7715	CG7715	42251	---	---	---	---
13036	154235_at	0.528601	0.390641	7.19227	4.01e-08	5.13e-07	8.07618	FBgn0030945	CG6632	Ing3	Ing3	32853	3677 // DNA binding // inferred from electronic annotation /// 4197 // cysteine-type endopeptidase activity // inferred from electronic annotation /// 16407 // acetyltransferase activity // inferred from electronic annotation /// 16740 // transferase activity // inferred from electronic annotation /// 4402 // histone acetyltransferase activity // inferred from direct assay	74 // regulation of progression through cell cycle // inferred from electronic annotation /// 6355 // regulation of transcription, DNA-dependent // inferred from electronic annotation /// 6508 // proteolysis // inferred from electronic annotation /// 6915 // apoptosis // inferred from electronic annotation /// 6917 // induction of apoptosis // inferred from electronic annotation /// 7049 // cell …	35267 // TIP60 histone acetyltransferase complex // inferred from direct assay	IPR001965 // Zn-finger-like, PHD finger // 4.3E-19
13969	AFFX-BioB-M_at	0.860632	1.57208	7.18377	4.1e-08	5.24e-07	8.05245	---	---	---	---	---	4015 // adenosylmethionine-8-amino-7-oxononanoate transaminase activity // inferred from electronic annotation /// 8483 // transaminase activity // inferred from electronic annotation /// 16740 // transferase activity // inferred from electronic annotation /// 30170 // pyridoxal phosphate binding // inferred from electronic annotation /// 3824 // catalytic activity // inferred from electronic ann…	9102 // biotin biosynthesis // inferred from electronic annotation /// 8152 // metabolism // inferred from electronic annotation /// 9058 // biosynthesis // inferred from electronic annotation /// 9236 // cobalamin biosynthesis // inferred from electronic annotation	---	---
5347	146546_at	0.673792	1.79996	7.16518	4.32e-08	5.5e-07	8.00057	FBgn0032867	CG15475	CG15475	CG15475	35319	---	---	---	---
3560	144759_at	0.426263	0.526023	7.16297	4.35e-08	5.52e-07	7.9944	FBgn0052700	CG32700	CG32700	CG32700	31896	16491 // oxidoreductase activity // inferred from electronic annotation /// 5515 // protein binding // inferred from physical interaction	8152 // metabolism // inferred from electronic annotation	---	---
7429	148628_at	0.674836	0.71623	7.15737	4.42e-08	5.6e-07	7.97875	FBgn0041096	CG32096	rols	rolling pebbles	39368	3824 // catalytic activity // inferred from electronic annotation /// 4842 // ubiquitin-protein ligase activity // inferred from electronic annotation /// 5057 // receptor signaling protein activity // inferred from electronic annotation /// 5102 // receptor binding // inferred from electronic annotation /// 5515 // protein binding // inferred from physical interaction /// 8270 // zinc ion bindin…	7520 // myoblast fusion // inferred from mutant phenotype /// 7520 // myoblast fusion // non-traceable author statement /// 7520 // myoblast fusion // traceable author statement /// 8283 // cell proliferation // inferred from electronic annotation /// 16567 // protein ubiquitination // inferred from electronic annotation /// 7186 // G-protein coupled receptor protein signaling pathway // inferred…	151 // ubiquitin ligase complex // inferred from electronic annotation /// 5737 // cytoplasm // inferred from direct assay /// 16021 // integral to membrane // inferred from electronic annotation	IPR002110 // Ankyrin // 1.1 /// IPR002110 // Ankyrin // 0.0037 /// IPR002110 // Ankyrin // 5.2E-7 /// IPR002110 // Ankyrin // 0.065 /// IPR002110 // Ankyrin // 2.3E-6 /// IPR002110 // Ankyrin // 1.6E-5 /// IPR002110 // Ankyrin // 6.7E-8 /// IPR002110 // Ankyrin // 1.9E-7 /// IPR002110 // Ankyrin // 1.4E-5 /// IPR002110 // Ankyrin // 0.021 /// IPR002110 // Ankyrin // 1.1 /// IPR002110 // Ankyrin /…
12733	153932_at	1.14416	1.88531	7.15336	4.47e-08	5.64e-07	7.96757	FBgn0031908	CG5177	CG5177	CG5177	34017	4805 // trehalose-phosphatase activity // inferred from sequence or structural similarity /// 3824 // catalytic activity // inferred from electronic annotation /// 4805 // trehalose-phosphatase activity // inferred from sequence similarity	5984 // disaccharide metabolism // inferred from electronic annotation /// 5992 // trehalose biosynthesis // inferred from electronic annotation /// 8152 // metabolism // inferred from electronic annotation	---	IPR003337 // Trehalose-phosphatase // 8.8E-11
5122	146321_at	0.72786	1.70307	7.15259	4.47e-08	5.65e-07	7.96541	FBgn0032492	CG5648	Pros6T	Pros6T	34726	4175 // endopeptidase activity // inferred from sequence or structural similarity /// 4175 // endopeptidase activity // non-traceable author statement /// 5515 // protein binding // inferred from physical interaction /// 4175 // endopeptidase activity // inferred from electronic annotation /// 4298 // threonine endopeptidase activity // inferred from electronic annotation /// 8233 // peptidase ac…	6508 // proteolysis // inferred from electronic annotation /// 6511 // ubiquitin-dependent protein catabolism // inferred from electronic annotation	5839 // proteasome core complex (sensu Eukaryota) // inferred from sequence or structural similarity /// 5839 // proteasome core complex (sensu Eukaryota) // non-traceable author statement /// 5829 // cytosol // inferred from electronic annotation /// 5839 // proteasome core complex (sensu Eukaryota) // inferred from electronic annotation /// 43234 // protein complex // inferred from electronic a…	IPR001353 // Peptidase T1, 20S proteasome // 3.3E-67
5605	146804_at	0.863274	2.59318	7.1515	4.49e-08	5.66e-07	7.96237	FBgn0033285	CG18449	CG18449	CG18449	35810	---	---	---	---
12924	154123_at	0.555891	2.01199	7.14894	4.52e-08	5.7e-07	7.95522	FBgn0037944	CG6923	CG6923	CG6923	41420	4842 // ubiquitin-protein ligase activity // inferred from electronic annotation /// 8270 // zinc ion binding // inferred from electronic annotation /// 5515 // protein binding // inferred from electronic annotation /// 46872 // metal ion binding // inferred from electronic annotation	7275 // development // inferred from electronic annotation /// 7498 // mesoderm development // inferred from electronic annotation /// 16567 // protein ubiquitination // inferred from electronic annotation /// 6512 // ubiquitin cycle // inferred from electronic annotation	151 // ubiquitin ligase complex // inferred from electronic annotation /// 5634 // nucleus // inferred from electronic annotation	IPR001841 // Zn-finger, RING // 2.2E-15
9983	151182_at	0.767764	2.14587	7.14063	4.63e-08	5.81e-07	7.93198	FBgn0040705	CG15434	CG15434	CG15434	50178	3954 // NADH dehydrogenase activity // inferred from sequence or structural similarity /// 3954 // NADH dehydrogenase activity // inferred from sequence similarity	6120 // mitochondrial electron transport, NADH to ubiquinone // inferred from sequence or structural similarity /// 6120 // mitochondrial electron transport, NADH to ubiquinone // inferred from sequence similarity	5747 // respiratory chain complex I (sensu Eukaryota) // inferred from sequence or structural similarity /// 5747 // respiratory chain complex I (sensu Eukaryota) // inferred from sequence similarity	IPR007741 // Mitochondrial ribosome // 9.7E-23
1742	142941_at	0.420582	0.312714	7.13037	4.76e-08	5.96e-07	7.90331	FBgn0000567	CG32180	Eip74EF	Ecdysone-induced protein 74EF	39962	3700 // transcription factor activity // traceable author statement /// 3704 // specific RNA polymerase II transcription factor activity // inferred from sequence or structural similarity /// 3677 // DNA binding // inferred from electronic annotation /// 3700 // transcription factor activity // inferred from electronic annotation /// 43565 // sequence-specific DNA binding // inferred from electro…	6355 // regulation of transcription, DNA-dependent // inferred from sequence or structural similarity /// 6357 // regulation of transcription from RNA polymerase II promoter // inferred from electronic annotation /// 6914 // autophagy // inferred from mutant phenotype /// 7498 // mesoderm development // inferred from electronic annotation /// 8219 // cell death // traceable author statement /// 9…	5634 // nucleus // inferred from sequence or structural similarity /// 5634 // nucleus // non-traceable author statement /// 5634 // nucleus // inferred from electronic annotation /// 5634 // nucleus // inferred from sequence similarity	IPR000418 // Ets-domain // 1.7E-56 /// IPR000418 // Ets-domain // 1.7E-56
3274	144473_at	0.585695	1.64027	7.11997	4.9e-08	6.11e-07	7.87425	FBgn0029702	CG15572	CG15572	CG15572	31371	---	---	---	---
1179	142378_at	0.857193	1.03111	7.11054	5.03e-08	6.26e-07	7.84786	FBgn0038652	CG7720	CG7720	CG7720	42257	8324 // cation transporter activity // inferred from electronic annotation /// 8507 // sodium:iodide symporter activity // inferred from sequence or structural similarity /// 5215 // transporter activity // inferred from electronic annotation /// 8507 // sodium:iodide symporter activity // inferred from sequence similarity	6732 // coenzyme metabolism // inferred from electronic annotation /// 6812 // cation transport // inferred from electronic annotation /// 6858 // extracellular transport // inferred from electronic annotation /// 51189 // prosthetic group metabolism // inferred from electronic annotation /// 6810 // transport // inferred from electronic annotation	16020 // membrane // inferred from electronic annotation	---
6319	147518_at	0.831151	3.86408	7.10759	5.07e-08	6.31e-07	7.83962	FBgn0034472	CG8517	CG8517	CG8517	37268	30508 // thiol-disulfide exchange intermediate activity // inferred from sequence or structural similarity /// 30508 // thiol-disulfide exchange intermediate activity // inferred from sequence similarity	6118 // electron transport // inferred from electronic annotation /// 6790 // sulfur metabolism // inferred from electronic annotation	5739 // mitochondrion // inferred from sequence or structural similarity /// 5739 // mitochondrion // inferred from sequence similarity	IPR006662 // Thioredoxin type domain // 3.5E-22
5515	146714_at	0.64315	0.715947	7.102	5.15e-08	6.4e-07	7.82397	FBgn0033133	CG12841	Tsp42Ek	Tetraspanin 42Ek	35621	5057 // receptor signaling protein activity // inferred from electronic annotation	7398 // ectoderm development // inferred from electronic annotation /// 7399 // nervous system development // inferred from electronic annotation /// 19226 // transmission of nerve impulse // inferred from electronic annotation	16021 // integral to membrane // inferred from sequence or structural similarity /// 16021 // integral to membrane // inferred from sequence similarity	IPR000301 // CD9/CD37/CD63 antigen // 3.3E-39
454	141653_at	0.38257	0.320522	7.09863	5.2e-08	6.44e-07	7.81455	FBgn0025630	CG4061	CG4061	CG4061	31175	3729 // mRNA binding // inferred from electronic annotation /// 3963 // RNA-3'-phosphate cyclase activity // inferred from sequence or structural similarity /// 16849 // phosphorus-oxygen lyase activity // inferred from electronic annotation /// 5515 // protein binding // inferred from physical interaction /// 3963 // RNA-3'-phosphate cyclase activity // inferred from electronic annotation /// 16…	398 // nuclear mRNA splicing, via spliceosome // inferred from electronic annotation	5634 // nucleus // inferred from sequence or structural similarity /// 5634 // nucleus // inferred from electronic annotation /// 5634 // nucleus // inferred from sequence similarity	IPR000228 // RNA 3-terminal phosphate cyclase // 8.6E-112 /// IPR000228 // RNA 3-terminal phosphate cyclase // 2.2E-43
1744	142943_at	0.399299	0.474317	7.08046	5.47e-08	6.75e-07	7.76369	FBgn0052772	CG32772	CG32772	CG32772	31420	3676 // nucleic acid binding // inferred from sequence or structural similarity /// 3677 // DNA binding // inferred from electronic annotation /// 8270 // zinc ion binding // inferred from electronic annotation /// 30528 // transcription regulator activity // inferred from electronic annotation /// 3676 // nucleic acid binding // inferred from electronic annotation /// 46872 // metal ion binding …	6357 // regulation of transcription from RNA polymerase II promoter // inferred from electronic annotation /// 8283 // cell proliferation // inferred from electronic annotation	5634 // nucleus // inferred from electronic annotation	IPR007087 // Zn-finger, C2H2 type // 5.5E-6 /// IPR007087 // Zn-finger, C2H2 type // 9.6E-7 /// IPR007087 // Zn-finger, C2H2 type // 2.9E-6 /// IPR007087 // Zn-finger, C2H2 type // 8.2E-5 /// IPR007087 // Zn-finger, C2H2 type // 1.9E-5 /// IPR007087 // Zn-finger, C2H2 type // 1.2E-6 /// IPR007087 // Zn-finger, C2H2 type // 9.6E-7 /// IPR007087 // Zn-finger, C2H2 type // 2.9E-6 /// IPR007087 // Zn…
13422	154621_at	0.794709	3.86979	7.07523	5.55e-08	6.81e-07	7.74904	FBgn0027493	CG17273	CG17273	CG17273	42466	4019 // adenylosuccinate synthase activity // inferred from sequence or structural similarity /// 4019 // adenylosuccinate synthase activity // non-traceable author statement /// 5525 // GTP binding // inferred from electronic annotation /// 5515 // protein binding // inferred from physical interaction /// 166 // nucleotide binding // inferred from electronic annotation /// 287 // magnesium ion b…	6164 // purine nucleotide biosynthesis // non-traceable author statement /// 6164 // purine nucleotide biosynthesis // inferred from electronic annotation	---	IPR001114 // Adenylosuccinate synthetase // 1.0E-126
11858	153057_at	0.938175	2.04185	7.07425	5.56e-08	6.82e-07	7.74629	FBgn0031476	CG8813	CG8813	CG8813	33490	5515 // protein binding // inferred from physical interaction	---	---	---
6355	147554_at	0.410643	0.695362	7.07192	5.6e-08	6.85e-07	7.73978	FBgn0028622	CG13432	l(2)05510	lethal (2) 05510	47065	5515 // protein binding // inferred from physical interaction	---	---	IPR001507 // Endoglin/CD105 antigen // 1.2E-47
10344	151543_at	0.59049	2.21673	7.07176	5.6e-08	6.85e-07	7.73932	FBgn0052459	CG32459	CG32459	CG32459	40502	---	---	---	---
7300	148499_at	0.635735	1.98469	7.07015	5.63e-08	6.87e-07	7.73482	FBgn0036056	CG6709	CG6709	CG6709	39166	---	---	---	---
3672	144871_at	0.560348	0.591678	7.04967	5.96e-08	7.24e-07	7.67744	FBgn0001624	CG1725	dlg1	discs large 1	32083	4385 // guanylate kinase activity // traceable author statement /// 5154 // epidermal growth factor receptor binding // traceable author statement /// 5198 // structural molecule activity // traceable author statement /// 5200 // structural constituent of cytoskeleton // inferred from electronic annotation /// 5515 // protein binding // inferred from sequence or structural similarity /// 5515 // …	74 // regulation of progression through cell cycle // non-traceable author statement /// 1738 // morphogenesis of a polarized epithelium // traceable author statement /// 2009 // morphogenesis of an epithelium // traceable author statement /// 6605 // protein targeting // inferred from electronic annotation /// 7010 // cytoskeleton organization and biogenesis // non-traceable author statement ///…	5737 // cytoplasm // non-traceable author statement /// 5856 // cytoskeleton // non-traceable author statement /// 5886 // plasma membrane // non-traceable author statement /// 5918 // septate junction // non-traceable author statement /// 5918 // septate junction // traceable author statement /// 5938 // cell cortex // inferred from direct assay /// 16020 // membrane // traceable author statemen…	IPR001478 // PDZ/DHR/GLGF domain // 3.6E-27 /// IPR001478 // PDZ/DHR/GLGF domain // 6.4E-20 /// IPR001478 // PDZ/DHR/GLGF domain // 2.0E-27 /// IPR001452 // SH3 // 1.2E-9 /// IPR008144 // Guanylate kinase // 3.8E-62 /// IPR001478 // PDZ/DHR/GLGF domain // 3.6E-27 /// IPR001478 // PDZ/DHR/GLGF domain // 6.4E-20 /// IPR001478 // PDZ/DHR/GLGF domain // 2.0E-27 /// IPR001452 // SH3 // 1.2E-9 /// IPR0…
4954	146153_at	0.535537	2.22963	7.04982	5.95e-08	7.24e-07	7.67784	FBgn0051716	CG31716	CG31716	CG31716	34416	3729 // mRNA binding // inferred from sequence or structural similarity /// 4842 // ubiquitin-protein ligase activity // inferred from electronic annotation /// 8270 // zinc ion binding // inferred from electronic annotation /// 16564 // transcriptional repressor activity // inferred from sequence or structural similarity /// 166 // nucleotide binding // inferred from electronic annotation /// 36…	6357 // regulation of transcription from RNA polymerase II promoter // inferred from electronic annotation /// 16481 // negative regulation of transcription // inferred from sequence or structural similarity /// 16567 // protein ubiquitination // inferred from electronic annotation /// 16481 // negative regulation of transcription // inferred from sequence similarity	151 // ubiquitin ligase complex // inferred from electronic annotation	IPR000504 // RNA-binding region RNP-1 (RNA recognition motif) // 1.7E-7
3289	144488_at	0.768753	0.862646	7.04536	6.03e-08	7.3e-07	7.66535	FBgn0029722	CG7024	CG7024	CG7024	31407	4739 // pyruvate dehydrogenase (acetyl-transferring) activity // inferred from sequence or structural similarity /// 5515 // protein binding // inferred from physical interaction /// 16624 // oxidoreductase activity, acting on the aldehyde or oxo group of donors, disulfide as acceptor // inferred from electronic annotation /// 4739 // pyruvate dehydrogenase (acetyl-transferring) activity // infer…	6099 // tricarboxylic acid cycle // inferred from electronic annotation /// 8152 // metabolism // inferred from electronic annotation	45254 // pyruvate dehydrogenase complex // inferred from sequence or structural similarity /// 45254 // pyruvate dehydrogenase complex // inferred from sequence similarity	IPR001017 // Dehydrogenase, E1 component // 1.0E-126
4675	145874_at	0.647925	2.029	7.04469	6.04e-08	7.31e-07	7.66349	FBgn0031784	CG9222	CG9222	CG9222	33867	4672 // protein kinase activity // non-traceable author statement /// 4674 // protein serine/threonine kinase activity // inferred from sequence or structural similarity /// 4702 // receptor signaling protein serine/threonine kinase activity // inferred from electronic annotation /// 5524 // ATP binding // inferred from electronic annotation /// 166 // nucleotide binding // inferred from electron…	6468 // protein amino acid phosphorylation // non-traceable author statement /// 7010 // cytoskeleton organization and biogenesis // inferred from electronic annotation /// 6468 // protein amino acid phosphorylation // inferred from electronic annotation	---	IPR000719 // Protein kinase // 5.9E-73
9973	151172_at	0.510258	-0.0600187	7.04314	6.06e-08	7.33e-07	7.65913	---	---	---	---	---	---	---	---	---
12980	154179_at	0.495495	1.5126	7.04237	6.08e-08	7.34e-07	7.65697	FBgn0037746	CG8478	CG8478	CG8478	41194	3676 // nucleic acid binding // inferred from electronic annotation /// 8270 // zinc ion binding // inferred from electronic annotation /// 46872 // metal ion binding // inferred from electronic annotation	---	5634 // nucleus // inferred from electronic annotation	IPR007087 // Zn-finger, C2H2 type // 2.3E-5 /// IPR007087 // Zn-finger, C2H2 type // 2.3E-5
9568	150767_at	0.607563	-0.0185273	7.04153	6.09e-08	7.35e-07	7.65462	FBgn0039572	CG4787	CG4787	CG4787	43364	3729 // mRNA binding // inferred from sequence or structural similarity /// 3729 // mRNA binding // inferred from sequence similarity	6915 // apoptosis // inferred from electronic annotation	---	IPR000504 // RNA-binding region RNP-1 (RNA recognition motif) // 3.4E-17
10336	151535_at	0.617221	1.75939	7.0368	6.17e-08	7.44e-07	7.64137	FBgn0046793	CG32236	CG32236	CG32236	249170	4867 // serine-type endopeptidase inhibitor activity // inferred from electronic annotation	19226 // transmission of nerve impulse // inferred from mutant phenotype /// 6457 // protein folding // inferred from electronic annotation	---	IPR002130 // Peptidyl-prolyl cis-trans isomerase, cyclophilin type // 8.8E-5
6565	147764_at	0.516755	0.711742	7.03264	6.24e-08	7.5e-07	7.62968	FBgn0034846	CG9863	CG9863	CG9863	37694	---	---	---	---
8522	149721_at	0.440456	0.180503	7.02537	6.37e-08	7.64e-07	7.6093	FBgn0037972	CG10005	CG10005	CG10005	41451	---	---	---	IPR001507 // Endoglin/CD105 antigen // 4.9E-9
2355	143554_at	0.833736	2.15981	7.02318	6.41e-08	7.68e-07	7.60316	FBgn0005614	CG18345	trpl	trp-like	36003	5261 // cation channel activity // traceable author statement /// 5262 // calcium channel activity // inferred from sequence or structural similarity /// 5516 // calmodulin binding // inferred from sequence or structural similarity /// 5516 // calmodulin binding // non-traceable author statement /// 5516 // calmodulin binding // traceable author statement /// 8086 // light-activated voltage-gated…	6816 // calcium ion transport // inferred from sequence or structural similarity /// 7589 // fluid secretion // inferred from mutant phenotype /// 9416 // response to light stimulus // traceable author statement /// 9628 // response to abiotic stimulus // inferred from mutant phenotype /// 19722 // calcium-mediated signaling // inferred from mutant phenotype /// 19722 // calcium-mediated signalin…	5886 // plasma membrane // inferred from sequence or structural similarity /// 5886 // plasma membrane // traceable author statement /// 5887 // integral to plasma membrane // non-traceable author statement /// 16028 // rhabdomere // inferred from direct assay /// 16028 // rhabdomere // non-traceable author statement /// 16028 // rhabdomere // traceable author statement /// 16027 // inaD signalin…	IPR005821 // Ion transport protein // 4.6E-32 /// IPR002110 // Ankyrin // 3.4 /// IPR002110 // Ankyrin // 6.2E-6 /// IPR005821 // Ion transport protein // 4.6E-32
5048	146247_at	0.823756	2.23517	7.01909	6.48e-08	7.76e-07	7.59168	FBgn0032370	CG12307	CG12307	CG12307	34584	---	---	---	---
4722	145921_at	0.919365	1.2758	7.01001	6.65e-08	7.94e-07	7.56622	FBgn0031853	CG11201	CG11201	CG11201	33946	4835 // tubulin-tyrosine ligase activity // inferred from electronic annotation /// 5200 // structural constituent of cytoskeleton // inferred from electronic annotation /// 16874 // ligase activity // inferred from electronic annotation	6464 // protein modification // inferred from electronic annotation /// 19538 // protein metabolism // inferred from electronic annotation	---	IPR004344 // Tubulin-tyrosine ligase // 9.5E-119
4127	145326_s_at	0.369484	0.913732	7.00419	6.76e-08	8.03e-07	7.54987	FBgn0030959 /// FBgn0030956	CG18259 /// CG6961	CG6961 /// CG18259	CG6961 /// CG18259	32866 /// 32869	3729 // mRNA binding // inferred from sequence or structural similarity /// 166 // nucleotide binding // inferred from electronic annotation /// 3676 // nucleic acid binding // inferred from electronic annotation /// 3729 // mRNA binding // inferred from sequence similarity	---	---	IPR000504 // RNA-binding region RNP-1 (RNA recognition motif) // 8.7E-16
1519	142718_at	0.336923	0.445875	7.0037	6.77e-08	8.04e-07	7.54849	FBgn0027500	CG17286	CG17286	CG17286	39850	---	---	---	---
1683	142882_at	0.616048	0.644646	6.99935	6.85e-08	8.12e-07	7.53628	FBgn0039501	CG5987	CG5987	CG5987	43282	4835 // tubulin-tyrosine ligase activity // inferred from sequence or structural similarity /// 5200 // structural constituent of cytoskeleton // inferred from electronic annotation /// 5515 // protein binding // inferred from physical interaction /// 4835 // tubulin-tyrosine ligase activity // inferred from electronic annotation /// 4835 // tubulin-tyrosine ligase activity // inferred from seque…	6464 // protein modification // inferred from electronic annotation /// 19538 // protein metabolism // inferred from electronic annotation	---	IPR004344 // Tubulin-tyrosine ligase // 1.0E-126
8887	150086_at	0.404955	0.287957	6.99391	6.96e-08	8.22e-07	7.52101	FBgn0038526	CG14327	CG14327	CG14327	42118	---	---	---	---
8374	149573_at	0.429872	0.563107	6.97895	7.25e-08	8.52e-07	7.47899	FBgn0037726	CG9492	CG9492	CG9492	41171	166 // nucleotide binding // inferred from electronic annotation /// 3774 // motor activity // inferred from sequence or structural similarity /// 3777 // microtubule motor activity // inferred from electronic annotation /// 4197 // cysteine-type endopeptidase activity // inferred from electronic annotation /// 5200 // structural constituent of cytoskeleton // inferred from electronic annotation …	6508 // proteolysis // inferred from electronic annotation /// 6928 // cell motility // inferred from electronic annotation /// 7018 // microtubule-based movement // inferred from sequence or structural similarity /// 7018 // microtubule-based movement // inferred from sequence similarity	5858 // axonemal dynein complex // inferred from sequence or structural similarity /// 5875 // microtubule associated complex // inferred from sequence or structural similarity /// 30286 // dynein complex // inferred from sequence or structural similarity /// 5858 // axonemal dynein complex // inferred from sequence similarity /// 5875 // microtubule associated complex // inferred from sequence s…	IPR004273 // Dynein heavy chain // 1.0E-126 /// IPR004273 // Dynein heavy chain // 1.1E-39
13264	154463_at	0.462481	1.01383	6.97788	7.27e-08	8.54e-07	7.47599	FBgn0037554	CG7602	DNApol-	DNApol-	40965	3676 // nucleic acid binding // inferred from electronic annotation /// 3887 // DNA-directed DNA polymerase activity // inferred from direct assay /// 3887 // DNA-directed DNA polymerase activity // inferred from mutant phenotype /// 16000 // iota DNA polymerase activity // inferred from direct assay /// 16000 // iota DNA polymerase activity // inferred from sequence or structural similarity /// …	19985 // bypass DNA synthesis // inferred from direct assay /// 19985 // bypass DNA synthesis // inferred from sequence or structural similarity /// 19985 // bypass DNA synthesis // non-traceable author statement /// 6260 // DNA replication // inferred from electronic annotation /// 6281 // DNA repair // inferred from electronic annotation /// 19985 // bypass DNA synthesis // inferred from sequen…	5634 // nucleus // inferred from electronic annotation	IPR001126 // UMUC-like DNA-repair protein // 6.9E-46
4687	145886_at	0.504502	1.05342	6.9751	7.33e-08	8.6e-07	7.46818	FBgn0031796	CG13984	CG13984	CG13984	33879	8080 // N-acetyltransferase activity // inferred from electronic annotation	---	---	---
6561	147760_at	0.935741	2.56842	6.96281	7.59e-08	8.86e-07	7.43364	FBgn0034840	CG3124	CG3124	CG3124	37688	5515 // protein binding // inferred from physical interaction	---	---	---
4700	145899_at	1.07878	0.712598	6.96016	7.64e-08	8.92e-07	7.42618	FBgn0031814	CG9528	retm	real-time	33899	5386 // carrier activity // inferred from electronic annotation /// 5488 // binding // inferred from electronic annotation /// 8526 // phosphatidylinositol transporter activity // inferred from sequence or structural similarity /// 8526 // phosphatidylinositol transporter activity // inferred from sequence similarity	6886 // intracellular protein transport // inferred from electronic annotation	5739 // mitochondrion // inferred from direct assay /// 5739 // mitochondrion // inferred from electronic annotation	IPR008273 // Cellular retinaldehyde-binding/triple function, N-terminal // 5.0E-13 /// IPR001251 // Cellular retinaldehyde-binding)/triple function, C-terminal // 5.4E-45 /// IPR006797 // MSF1 // 6.9E-82
3550	144749_at	0.612211	0.461851	6.95219	7.81e-08	9.11e-07	7.40378	FBgn0052703	CG32703	CG32703	CG32703	31877	4674 // protein serine/threonine kinase activity // non-traceable author statement /// 4707 // MAP kinase activity // inferred from sequence or structural similarity /// 5524 // ATP binding // inferred from electronic annotation /// 5515 // protein binding // inferred from physical interaction /// 166 // nucleotide binding // inferred from electronic annotation /// 4672 // protein kinase activity…	165 // MAPKKK cascade // inferred from electronic annotation /// 6468 // protein amino acid phosphorylation // non-traceable author statement /// 6916 // anti-apoptosis // inferred from electronic annotation /// 8283 // cell proliferation // inferred from electronic annotation /// 6468 // protein amino acid phosphorylation // inferred from electronic annotation	---	IPR000719 // Protein kinase // 3.5E-80
4356	145555_at	0.622314	0.278539	6.95141	7.83e-08	9.12e-07	7.40159	FBgn0031294	CG31795	ia2	ia2	33277	4725 // protein tyrosine phosphatase activity // non-traceable author statement /// 5001 // transmembrane receptor protein tyrosine phosphatase activity // inferred from sequence or structural similarity /// 5001 // transmembrane receptor protein tyrosine phosphatase activity // non-traceable author statement /// 4721 // phosphoprotein phosphatase activity // inferred from electronic annotation /…	6470 // protein amino acid dephosphorylation // non-traceable author statement /// 6470 // protein amino acid dephosphorylation // inferred from electronic annotation	5886 // plasma membrane // inferred from sequence or structural similarity /// 5886 // plasma membrane // inferred from sequence similarity	IPR000242 // Tyrosine specific protein phosphatase // 4.7E-101 /// IPR000242 // Tyrosine specific protein phosphatase // 4.7E-101
8682	149881_at	0.559309	2.31521	6.95008	7.86e-08	9.14e-07	7.39785	FBgn0038210	CG3199	CG3199	CG3199	41725	---	---	---	---
1207	142406_at	0.410044	1.32567	6.93613	8.17e-08	9.49e-07	7.35862	FBgn0036236	CG6931	CG6931	CG6931	39363	---	---	---	---
4224	145423_at	0.637571	0.149181	6.93054	8.3e-08	9.63e-07	7.3429	FBgn0031108	CG15459	CG15459	CG15459	33036	---	---	---	---
8233	149432_at	0.765299	2.1906	6.9154	8.66e-08	1e-06	7.30028	FBgn0037486	CG14605	CG14605	CG14605	40867	5215 // transporter activity // inferred from electronic annotation	6810 // transport // inferred from electronic annotation	16020 // membrane // inferred from electronic annotation /// 16021 // integral to membrane // inferred from electronic annotation	IPR005828 // General substrate transporter // 1.3E-27 /// IPR005828 // General substrate transporter // 1.3E-27 /// IPR005828 // General substrate transporter // 6.3E-8
1580	142779_at	0.580665	0.663932	6.9145	8.68e-08	1e-06	7.29774	FBgn0035309	CG15879	CG15879	CG15879	38274	16787 // hydrolase activity // inferred from electronic annotation /// 3824 // catalytic activity // inferred from electronic annotation	---	---	---
4376	145575_at	0.647387	1.28145	6.9107	8.78e-08	1.01e-06	7.28704	FBgn0031332	CG5556	CG5556	CG5556	33320	3824 // catalytic activity // inferred from electronic annotation	8152 // metabolism // inferred from electronic annotation	---	IPR005834 // Haloacid dehalogenase-like hydrolase // 4.8E-5 /// IPR005834 // Haloacid dehalogenase-like hydrolase // 4.8E-5
5401	146600_at	0.509194	1.03303	6.90788	8.84e-08	1.02e-06	7.27912	FBgn0032964	CG11630	CG11630	CG11630	35429	---	---	---	IPR004245 // Protein of unknown function DUF229 // 1.0E-126
3923	145122_at	0.496394	1.66948	6.9058	8.9e-08	1.02e-06	7.27326	FBgn0030643	CG15641	CG15641	CG15641	32477	---	---	---	---
3360	144559_at	0.722089	1.15104	6.8983	9.08e-08	1.04e-06	7.25213	FBgn0029819	CG3016	CG3016	CG3016	31519	4197 // cysteine-type endopeptidase activity // inferred from electronic annotation /// 4221 // ubiquitin thiolesterase activity // inferred from electronic annotation /// 4843 // ubiquitin-specific protease activity // inferred from sequence or structural similarity /// 5515 // protein binding // inferred from physical interaction /// 4843 // ubiquitin-specific protease activity // inferred from…	6508 // proteolysis // inferred from electronic annotation /// 6511 // ubiquitin-dependent protein catabolism // inferred from electronic annotation /// 16579 // protein deubiquitination // inferred from sequence or structural similarity /// 16579 // protein deubiquitination // inferred from sequence similarity	---	IPR001394 // Peptidase C19, ubiquitin carboxyl-terminal hydrolase family 2 // 3.3E-8 /// IPR001394 // Peptidase C19, ubiquitin carboxyl-terminal hydrolase family 2 // 1.4E-18 /// IPR001394 // Peptidase C19, ubiquitin carboxyl-terminal hydrolase family 2 // 4.2E-21
4736	145935_at	0.892179	2.5414	6.89765	9.1e-08	1.04e-06	7.2503	FBgn0031878 /// FBgn0067929	CG9188	sip2 /// Dyaksip2	septin interacting protein 2 /// sip2	33979	5515 // protein binding // inferred from physical interaction	---	---	---
2234	143433_at	0.841588	5.30612	6.88532	9.42e-08	1.07e-06	7.21556	FBgn0004172	CG17946	Mst84Da	Male-specific RNA 84Da	40889	5506 // iron ion binding // inferred from electronic annotation	6118 // electron transport // inferred from electronic annotation	---	IPR005634 // Male specific sperm protein // 7.1E-12
1384	142583_at	0.819459	2.86597	6.87917	9.58e-08	1.09e-06	7.19825	FBgn0034497	CG9090	CG9090	CG9090	37297	5386 // carrier activity // inferred from sequence or structural similarity /// 5488 // binding // inferred from electronic annotation /// 15114 // phosphate transporter activity // inferred from sequence or structural similarity /// 5515 // protein binding // inferred from physical interaction /// 5386 // carrier activity // inferred from sequence similarity /// 15114 // phosphate transporter ac…	6796 // phosphate metabolism // inferred from electronic annotation /// 6817 // phosphate transport // inferred from sequence or structural similarity /// 6810 // transport // inferred from electronic annotation /// 6817 // phosphate transport // inferred from sequence similarity	5740 // mitochondrial envelope // inferred from sequence or structural similarity /// 5743 // mitochondrial inner membrane // inferred from electronic annotation /// 16020 // membrane // inferred from electronic annotation /// 16021 // integral to membrane // inferred from electronic annotation /// 5740 // mitochondrial envelope // inferred from sequence similarity	IPR001993 // Mitochondrial substrate carrier // 4.1E-28 /// IPR001993 // Mitochondrial substrate carrier // 1.4E-24 /// IPR001993 // Mitochondrial substrate carrier // 1.3E-10
8998	150197_at	0.962469	2.18824	6.87851	9.6e-08	1.09e-06	7.19637	FBgn0038706	CG3517	CG3517	CG3517	42324	---	---	---	---
1642	142841_at	0.66489	2.34129	6.86083	1.01e-07	1.14e-06	7.14654	FBgn0031142	CG10998	CG10998	CG10998	33075	5488 // binding // inferred from electronic annotation	---	---	IPR010782 // Protein of unknown function DUF1377 // 1.0E-126
5725	146924_at	0.456905	1.25133	6.85998	1.01e-07	1.14e-06	7.14416	FBgn0033490	CG12917	CG12917	CG12917	36065	3676 // nucleic acid binding // inferred from electronic annotation /// 4519 // endonuclease activity // inferred from electronic annotation	---	---	IPR001604 // DNA/RNA non-specific endonuclease // 2.9E-79
2075	143274_at	0.704059	4.70288	6.85641	1.02e-07	1.15e-06	7.13409	FBgn0002862	CG17956	Mst87F	Male-specific RNA 87F	41693	5506 // iron ion binding // inferred from electronic annotation	6118 // electron transport // inferred from electronic annotation	---	---
6825	148024_at	0.510081	0.225581	6.85636	1.02e-07	1.15e-06	7.13395	FBgn0052311	CG33484	zormin	zormin	2769001	5200 // structural constituent of cytoskeleton // inferred from sequence or structural similarity /// 5200 // structural constituent of cytoskeleton // inferred from sequence similarity	6936 // muscle contraction // inferred from electronic annotation	16020 // membrane // inferred from electronic annotation	IPR002017 // Spectrin repeat // 0.02 /// IPR002017 // Spectrin repeat // 2.1E-4 /// IPR007110 // Immunoglobulin-like // 1.1E-7 /// IPR007110 // Immunoglobulin-like // 5.7E-9 /// IPR007110 // Immunoglobulin-like // 5.0E-4 /// IPR007110 // Immunoglobulin-like // 0.11 /// IPR007110 // Immunoglobulin-like // 0.68 /// IPR007110 // Immunoglobulin-like // 3.4E-5 /// IPR007110 // Immunoglobulin-like // 2…
4230	145429_i_at	0.460212	-0.255305	6.85508	1.03e-07	1.15e-06	7.13033	FBgn0031116	CG1695	CG1695	CG1695	33046	5083 // small GTPase regulator activity // inferred from electronic annotation	6886 // intracellular protein transport // inferred from electronic annotation	---	IPR000195 // RabGAP/TBC domain // 2.8E-8 /// IPR004012 // RUN domain // 1.4E-50
11486	152685_at	0.456067	0.63837	6.85531	1.02e-07	1.15e-06	7.13099	FBgn0040345	CG3708	CG3708	CG3708	31039	42393 // histone binding // inferred from sequence or structural similarity /// 5515 // protein binding // inferred from physical interaction /// 42393 // histone binding // inferred from sequence similarity	6334 // nucleosome assembly // inferred from sequence or structural similarity /// 6461 // protein complex assembly // inferred from electronic annotation /// 6334 // nucleosome assembly // inferred from electronic annotation /// 6334 // nucleosome assembly // inferred from sequence similarity	5634 // nucleus // inferred from electronic annotation	IPR002164 // Nucleosome assembly protein (NAP) // 2.7E-68
11574	152773_at	0.524607	0.547728	6.85283	1.03e-07	1.16e-06	7.12399	FBgn0040391 /// FBgn0053218	CG2854	CG2854 /// CG33218	CG2854 /// CG33218	2768907 /// 31219	---	---	---	---
9501	150700_at	0.950383	0.351231	6.84892	1.04e-07	1.17e-06	7.11297	FBgn0039472	CG17192	CG17192	CG17192	43248	4806 // triacylglycerol lipase activity // inferred from sequence or structural similarity /// 5198 // structural molecule activity // inferred from electronic annotation /// 8970 // phospholipase A1 activity // inferred from electronic annotation /// 3824 // catalytic activity // inferred from electronic annotation /// 4806 // triacylglycerol lipase activity // inferred from sequence similarity	6629 // lipid metabolism // inferred from electronic annotation /// 7018 // microtubule-based movement // inferred from electronic annotation	5874 // microtubule // inferred from electronic annotation	IPR000734 // Lipase // 1.4E-47
1112	142311_at	0.717858	1.63266	6.83896	1.07e-07	1.2e-06	7.08487	FBgn0017456	CG12799	Ubc84D	Ubiquitin conjugating enzyme 84D	40900	4840 // ubiquitin conjugating enzyme activity // inferred from sequence or structural similarity /// 4840 // ubiquitin conjugating enzyme activity // non-traceable author statement /// 16874 // ligase activity // inferred from electronic annotation /// 4840 // ubiquitin conjugating enzyme activity // inferred from sequence similarity	6512 // ubiquitin cycle // inferred from sequence or structural similarity /// 19538 // protein metabolism // inferred from electronic annotation /// 6512 // ubiquitin cycle // inferred from sequence similarity	---	IPR000608 // Ubiquitin-conjugating enzymes // 5.8E-55
11844	153043_at	0.800502	2.34491	6.83683	1.08e-07	1.21e-06	7.07885	---	CG18170 /// CG33791	---	---	---	4591 // oxoglutarate dehydrogenase (succinyl-transferring) activity // inferred from sequence or structural similarity /// 4591 // oxoglutarate dehydrogenase (succinyl-transferring) activity // inferred from electronic annotation /// 30976 // thiamin pyrophosphate binding // inferred from electronic annotation /// 16624 // oxidoreductase activity, acting on the aldehyde or oxo group of donors, di…	6099 // tricarboxylic acid cycle // inferred from sequence or structural similarity /// 6096 // glycolysis // inferred from electronic annotation /// 8152 // metabolism // inferred from electronic annotation	9353 // oxoglutarate dehydrogenase complex (sensu Eukaryota) // inferred from sequence or structural similarity	---
4039	145238_at	0.531589	0.0596557	6.82998	1.1e-07	1.23e-06	7.05954	FBgn0030831	CG12997	CG12997	CG12997	32712	---	---	---	---
11828	153027_at	0.845712	1.9481	6.82129	1.13e-07	1.26e-06	7.03501	FBgn0035598	CG4669	CG4669	CG4669	38608	---	---	---	---
2321	143520_at	0.443034	-0.131099	6.81545	1.15e-07	1.28e-06	7.01852	FBgn0004858	CG4220	elB	elbow B	34844	3676 // nucleic acid binding // inferred from electronic annotation /// 3702 // RNA polymerase II transcription factor activity // inferred from sequence or structural similarity /// 8270 // zinc ion binding // inferred from electronic annotation /// 3702 // RNA polymerase II transcription factor activity // inferred from sequence similarity	7424 // tracheal system development (sensu Insecta) // inferred from mutant phenotype	5634 // nucleus // inferred from sequence or structural similarity /// 5634 // nucleus // inferred from electronic annotation /// 5634 // nucleus // inferred from sequence similarity	---
7529	148728_at	0.679355	-0.464912	6.81359	1.15e-07	1.28e-06	7.01324	FBgn0036384	CG17368	CG17368	CG17368	39533	---	---	---	---
10631	151830_at	0.809479	3.46679	6.8091	1.17e-07	1.29e-06	7.00059	FBgn0011296	CG4533	l(2)efl	lethal (2) essential for life	37744	42802 // identical protein binding // inferred from physical interaction	6457 // protein folding // inferred from electronic annotation /// 6950 // response to stress // inferred from electronic annotation /// 6952 // defense response // inferred from electronic annotation /// 9408 // response to heat // non-traceable author statement /// 9790 // embryonic development // non-traceable author statement /// 6986 // response to unfolded protein // inferred from electroni…	---	IPR002068 // Heat shock protein Hsp20 // 1.0E-18 /// IPR002068 // Heat shock protein Hsp20 // 1.2E-35 /// IPR002068 // Heat shock protein Hsp20 // 6.7E-19
5873	147072_at	0.828698	1.17767	6.80778	1.17e-07	1.3e-06	6.99684	FBgn0033705	CG13168	CG13168	CG13168	36327	---	---	---	---
6457	147656_at	0.455878	-0.172933	6.80816	1.17e-07	1.3e-06	6.99793	FBgn0067102	CG6437	GlcT-1	GlcT-1	37516	8120 // ceramide glucosyltransferase activity // inferred from direct assay /// 8120 // ceramide glucosyltransferase activity // inferred from sequence or structural similarity /// 8120 // ceramide glucosyltransferase activity // inferred from sequence similarity	43066 // negative regulation of apoptosis // inferred from mutant phenotype	139 // Golgi membrane // inferred from direct assay /// 5789 // endoplasmic reticulum membrane // inferred from direct assay	---
11783	152982_at	0.831332	1.47617	6.80767	1.17e-07	1.3e-06	6.99653	FBgn0035231	CG18330	Cct2	CTP:phosphocholine cytidylyltransferase 2	38180	4105 // choline-phosphate cytidylyltransferase activity // inferred from direct assay /// 4105 // choline-phosphate cytidylyltransferase activity // inferred from sequence or structural similarity /// 16779 // nucleotidyltransferase activity // inferred from electronic annotation /// 4105 // choline-phosphate cytidylyltransferase activity // inferred from sequence similarity	6644 // phospholipid metabolism // inferred from electronic annotation /// 9058 // biosynthesis // inferred from electronic annotation	---	IPR004820 // Cytidylyltransferase // 8.2E-32
9118	150317_at	0.445038	1.56424	6.80702	1.17e-07	1.3e-06	6.9947	FBgn0038892	CG15498	CG15498	CG15498	42548	3676 // nucleic acid binding // inferred from electronic annotation	---	5634 // nucleus // inferred from electronic annotation	---
1803	143002_at	0.827079	0.929795	6.80378	1.18e-07	1.31e-06	6.98556	FBgn0052628	CG32628	CG32628	CG32628	318129	3824 // catalytic activity // inferred from electronic annotation	8152 // metabolism // inferred from electronic annotation	---	---
7959	149158_at	0.767987	1.84859	6.79141	1.23e-07	1.35e-06	6.9506	FBgn0037040	CG12983	CG12983	CG12983	40319	---	---	---	---
8352	149551_at	1.38687	2.31406	6.77888	1.27e-07	1.39e-06	6.91521	FBgn0053936	CG33936	CG33936	CG33936	41114	3677 // DNA binding // inferred from electronic annotation /// 8270 // zinc ion binding // inferred from electronic annotation	---	---	---
8782	149981_at	0.835646	2.09322	6.77695	1.28e-07	1.39e-06	6.90976	FBgn0038373	CG4546	CG4546	CG4546	41922	4054 // arginine kinase activity // inferred from sequence or structural similarity /// 19202 // amino acid kinase activity // inferred from electronic annotation /// 5515 // protein binding // inferred from physical interaction /// 16301 // kinase activity // inferred from electronic annotation /// 16740 // transferase activity // inferred from electronic annotation /// 16772 // transferase acti…	---	---	IPR000749 // ATP:guanido phosphotransferase // 1.2E-14 /// IPR000749 // ATP:guanido phosphotransferase // 1.1E-94
9337	150536_at	0.497563	0.566406	6.77704	1.28e-07	1.39e-06	6.91001	FBgn0051121	CG31121	CG31121	CG31121	42975	5215 // transporter activity // inferred from sequence or structural similarity /// 5524 // ATP binding // inferred from electronic annotation /// 42626 // ATPase activity, coupled to transmembrane movement of substances // inferred from sequence or structural similarity /// 166 // nucleotide binding // inferred from electronic annotation /// 16887 // ATPase activity // inferred from electronic a…	6810 // transport // inferred from sequence or structural similarity /// 6810 // transport // inferred from electronic annotation /// 6810 // transport // inferred from sequence similarity	43190 // ATP-binding cassette (ABC) transporter complex // inferred from sequence or structural similarity /// 16020 // membrane // inferred from electronic annotation /// 16021 // integral to membrane // inferred from electronic annotation /// 43190 // ATP-binding cassette (ABC) transporter complex // inferred from sequence similarity	---
8764	149963_at	0.414249	1.16241	6.77534	1.28e-07	1.4e-06	6.90519	FBgn0038345	CG5213	CG5213	CG5213	41892	3729 // mRNA binding // inferred from sequence or structural similarity /// 166 // nucleotide binding // inferred from electronic annotation /// 3676 // nucleic acid binding // inferred from electronic annotation /// 3723 // RNA binding // inferred from electronic annotation /// 3729 // mRNA binding // inferred from sequence similarity	398 // nuclear mRNA splicing, via spliceosome // inferred from electronic annotation /// 6398 // histone mRNA 3'-end processing // inferred from electronic annotation /// 8283 // cell proliferation // inferred from electronic annotation	---	IPR000504 // RNA-binding region RNP-1 (RNA recognition motif) // 9.9E-22 /// IPR000504 // RNA-binding region RNP-1 (RNA recognition motif) // 1.8E-19
12398	153597_at	0.586744	3.67146	6.76836	1.31e-07	1.42e-06	6.88546	FBgn0024291	CG5216	Sir2	Sir2	34708	3682 // chromatin binding // inferred from electronic annotation /// 4407 // histone deacetylase activity // inferred from direct assay /// 17136 // NAD-dependent histone deacetylase activity // inferred from direct assay /// 17136 // NAD-dependent histone deacetylase activity // inferred from sequence or structural similarity /// 3677 // DNA binding // inferred from electronic annotation /// 171…	6333 // chromatin assembly or disassembly // inferred from electronic annotation /// 6342 // chromatin silencing // inferred from electronic annotation /// 6355 // regulation of transcription, DNA-dependent // inferred from electronic annotation /// 7584 // response to nutrient // inferred from mutant phenotype /// 8340 // determination of adult life span // inferred from mutant phenotype /// 165…	5634 // nucleus // inferred from direct assay /// 5677 // chromatin silencing complex // inferred from electronic annotation /// 5737 // cytoplasm // inferred from direct assay	IPR003000 // Silent information regulator protein Sir2 // 1.8E-121
13702	154901_at	0.369444	2.09219	6.76604	1.32e-07	1.43e-06	6.87892	FBgn0036197	CG7319	CG7319	CG7319	39320	179 // rRNA (adenine-N6,N6-)-dimethyltransferase activity // inferred from electronic annotation /// 3676 // nucleic acid binding // inferred from electronic annotation /// 16433 // rRNA (adenine) methyltransferase activity // inferred from sequence or structural similarity /// 8649 // rRNA methyltransferase activity // inferred from electronic annotation /// 8757 // S-adenosylmethionine-dependen…	154 // rRNA modification // inferred from electronic annotation /// 16072 // rRNA metabolism // inferred from electronic annotation /// 6364 // rRNA processing // inferred from electronic annotation	---	IPR001737 // Ribosomal RNA adenine dimethylase // 1.2E-29 /// IPR001737 // Ribosomal RNA adenine dimethylase // 1.2E-29
12312	153511_at	0.4951	0.95419	6.76107	1.33e-07	1.45e-06	6.86485	FBgn0031972	CG7221	CG7221	CG7221	34090	16614 // oxidoreductase activity, acting on CH-OH group of donors // inferred from sequence or structural similarity /// 16491 // oxidoreductase activity // inferred from mutant phenotype /// 16491 // oxidoreductase activity // inferred from electronic annotation /// 16614 // oxidoreductase activity, acting on CH-OH group of donors // inferred from sequence similarity	6915 // apoptosis // inferred from electronic annotation /// 8152 // metabolism // inferred from electronic annotation /// 8152 // metabolism // inferred from mutant phenotype /// 10212 // response to ionizing radiation // inferred from mutant phenotype	5737 // cytoplasm // inferred from direct assay	IPR001202 // WW/Rsp5/WWP domain // 3.7E-10 /// IPR002198 // Short-chain dehydrogenase/reductase SDR // 7.3E-17
11245	152444_at	0.469896	1.52795	6.75875	1.34e-07	1.46e-06	6.85829	FBgn0011236	CG5575	ken	ken and barbie	37785	3676 // nucleic acid binding // inferred from sequence or structural similarity /// 3700 // transcription factor activity // inferred from sequence or structural similarity /// 5515 // protein binding // inferred from sequence or structural similarity /// 8270 // zinc ion binding // inferred from electronic annotation /// 3677 // DNA binding // inferred from mutant phenotype /// 5515 // protein b…	7320 // insemination // inferred from mutant phenotype /// 7485 // male genitalia development (sensu Endopterygota) // inferred from mutant phenotype /// 7486 // female genitalia development (sensu Endopterygota) // inferred from mutant phenotype /// 7620 // copulation // non-traceable author statement /// 45496 // male analia development (sensu Endopterygota) // inferred from mutant phenotype //…	5634 // nucleus // inferred from sequence or structural similarity /// 5634 // nucleus // inferred from mutant phenotype /// 5634 // nucleus // inferred from electronic annotation /// 5634 // nucleus // inferred from sequence similarity	IPR007087 // Zn-finger, C2H2 type // 1.6E-6 /// IPR000210 // BTB/POZ domain // 8.3E-19
9168	150367_at	0.41481	0.134351	6.75784	1.35e-07	1.46e-06	6.85572	FBgn0051160	CG31160	CG31160	CG31160	42638	5515 // protein binding // inferred from sequence or structural similarity /// 30528 // transcription regulator activity // inferred from electronic annotation /// 5515 // protein binding // inferred from sequence similarity	6333 // chromatin assembly or disassembly // inferred from electronic annotation /// 6357 // regulation of transcription from RNA polymerase II promoter // inferred from electronic annotation /// 7530 // sex determination // inferred from electronic annotation /// 19226 // transmission of nerve impulse // inferred from electronic annotation	---	IPR007588 // FLYWCH Zn-finger // 3.8E-24 /// IPR000210 // BTB/POZ domain // 9.4E-28 /// IPR007588 // FLYWCH Zn-finger // 3.8E-24
4573	145772_at	0.392719	1.04873	6.75039	1.38e-07	1.49e-06	6.83464	FBgn0031620	CG11929	CG11929	CG11929	33668	---	---	---	---
6639	147838_at	0.630333	0.431443	6.74289	1.4e-07	1.52e-06	6.81343	FBgn0034973	CG13564	CG13564	CG13564	37855	---	---	---	IPR007512 // Protein of unknown function DUF543 // 2.0E-57
9174	150373_at	0.794859	3.6146	6.73203	1.45e-07	1.56e-06	6.78271	FBgn0038979	CG7046	CG7046	CG7046	42651	3677 // DNA binding // inferred from sequence or structural similarity /// 3677 // DNA binding // inferred from electronic annotation /// 3677 // DNA binding // inferred from sequence similarity	6355 // regulation of transcription, DNA-dependent // inferred from electronic annotation	785 // chromatin // inferred from sequence or structural similarity /// 5634 // nucleus // inferred from sequence or structural similarity /// 785 // chromatin // inferred from electronic annotation /// 5634 // nucleus // inferred from electronic annotation /// 785 // chromatin // inferred from sequence similarity /// 5634 // nucleus // inferred from sequence similarity	IPR000910 // HMG1/2 (high mobility group) box // 9.2E-24
1296	142495_at	0.946626	2.06561	6.73145	1.45e-07	1.56e-06	6.78107	FBgn0025111	CG1683	Ant2	Adenine nucleotide translocase 2	32008	5386 // carrier activity // inferred from sequence or structural similarity /// 5471 // ATP:ADP antiporter activity // inferred from sequence or structural similarity /// 5471 // ATP:ADP antiporter activity // non-traceable author statement /// 5488 // binding // inferred from electronic annotation /// 5386 // carrier activity // inferred from sequence similarity /// 5471 // ATP:ADP antiporter ac…	6139 // nucleobase, nucleoside, nucleotide and nucleic acid metabolism // inferred from electronic annotation /// 6812 // cation transport // inferred from electronic annotation /// 15866 // ADP transport // inferred from sequence or structural similarity /// 15867 // ATP transport // inferred from sequence or structural similarity /// 15866 // ADP transport // inferred from sequence similarity /…	5740 // mitochondrial envelope // inferred from sequence or structural similarity /// 5743 // mitochondrial inner membrane // inferred from sequence or structural similarity /// 5743 // mitochondrial inner membrane // non-traceable author statement /// 5740 // mitochondrial envelope // inferred from sequence similarity /// 5743 // mitochondrial inner membrane // inferred from sequence similarity	IPR001993 // Mitochondrial substrate carrier // 3.0E-37 /// IPR001993 // Mitochondrial substrate carrier // 4.6E-35 /// IPR001993 // Mitochondrial substrate carrier // 1.2E-21
3189	144388_at	0.378725	0.609647	6.7302	1.46e-07	1.56e-06	6.77753	FBgn0029589	CG14810	CG14810	CG14810	31131	---	---	---	---
5575	146774_at	0.451848	-0.0386658	6.72961	1.46e-07	1.56e-06	6.77586	FBgn0050377	CG30377	CG30377	CG30377	50252	---	---	---	---
11051	152250_at	0.960268	1.85749	6.72928	1.46e-07	1.56e-06	6.77493	FBgn0036763	CG7441	CG7441	CG7441	39989	4830 // tryptophan-tRNA ligase activity // inferred from sequence or structural similarity /// 5524 // ATP binding // inferred from electronic annotation /// 5515 // protein binding // inferred from physical interaction /// 4812 // aminoacyl-tRNA ligase activity // inferred from electronic annotation /// 4830 // tryptophan-tRNA ligase activity // inferred from electronic annotation /// 4830 // tr…	6418 // tRNA aminoacylation for protein translation // inferred from electronic annotation /// 6436 // tryptophanyl-tRNA aminoacylation // inferred from electronic annotation /// 6412 // protein biosynthesis // inferred from electronic annotation	---	IPR002305 // Aminoacyl-tRNA synthetase, class Ib // 3.5E-79
8058	149257_at	0.516555	1.38302	6.72323	1.48e-07	1.59e-06	6.75778	FBgn0037195	CG11226	CG11226	CG11226	40501	---	---	---	---
11859	153058_at	0.466829	1.12834	6.72038	1.5e-07	1.6e-06	6.74972	FBgn0030814	CG4955	CG4955	CG4955	32692	5515 // protein binding // inferred from physical interaction	---	---	---
2391	143590_at	0.373934	0.111795	6.71527	1.52e-07	1.62e-06	6.73526	FBgn0010258	CG9654	Rbp4	RNA-binding protein 4	41668	3727 // single-stranded RNA binding // inferred from direct assay /// 3729 // mRNA binding // inferred from sequence or structural similarity /// 3729 // mRNA binding // non-traceable author statement /// 166 // nucleotide binding // inferred from electronic annotation /// 3676 // nucleic acid binding // inferred from electronic annotation /// 3729 // mRNA binding // inferred from sequence simila…	6397 // mRNA processing // inferred from sequence or structural similarity /// 6403 // RNA localization // inferred from electronic annotation /// 6397 // mRNA processing // inferred from sequence similarity	5737 // cytoplasm // inferred from direct assay	IPR000504 // RNA-binding region RNP-1 (RNA recognition motif) // 4.8E-16 /// IPR000504 // RNA-binding region RNP-1 (RNA recognition motif) // 3.0E-16
3867	145066_r_at	0.504559	1.54472	6.71207	1.53e-07	1.63e-06	6.72621	FBgn0030566	CG18313	CG18313	CG18313	32389	---	---	---	---
10504	151703_at	0.678063	2.3768	6.70896	1.55e-07	1.64e-06	6.7174	FBgn0031057	CG14224	CG14224	CG14224	32977	5515 // protein binding // inferred from physical interaction /// 16491 // oxidoreductase activity // inferred from electronic annotation	6508 // proteolysis // inferred from electronic annotation /// 19538 // protein metabolism // inferred from electronic annotation /// 6464 // protein modification // inferred from electronic annotation	---	IPR000626 // Ubiquitin // 5.1E-22 /// IPR000449 // Ubiquitin-associated domain // 3.0E-7
3659	144858_at	0.397038	-0.417484	6.70701	1.55e-07	1.65e-06	6.71187	FBgn0030282	CG12625	CG12625	CG12625	32064	---	---	---	---
7883	149082_at	0.571592	0.696033	6.70494	1.56e-07	1.66e-06	6.706	FBgn0036924	CG7570	hale	hale-bopp	40183	5515 // protein binding // inferred from physical interaction	---	---	---
3702	144901_at	0.471071	0.804094	6.69839	1.59e-07	1.69e-06	6.68746	FBgn0030343	CG1886	ATP7	ATP7	32142	4008 // copper-exporting ATPase activity // inferred from sequence or structural similarity /// 5507 // copper ion binding // inferred from electronic annotation /// 5524 // ATP binding // inferred from electronic annotation /// 46872 // metal ion binding // inferred from electronic annotation /// 166 // nucleotide binding // inferred from electronic annotation /// 3824 // catalytic activity // i…	6812 // cation transport // inferred from electronic annotation /// 6825 // copper ion transport // inferred from mutant phenotype /// 8152 // metabolism // inferred from electronic annotation /// 6825 // copper ion transport // inferred from electronic annotation /// 30001 // metal ion transport // inferred from electronic annotation	16020 // membrane // inferred from electronic annotation /// 16021 // integral to membrane // inferred from electronic annotation	IPR006121 // Heavy metal transport/detoxification protein // 3.1E-7 /// IPR006121 // Heavy metal transport/detoxification protein // 4.6E-14 /// IPR006121 // Heavy metal transport/detoxification protein // 2.4E-6 /// IPR006121 // Heavy metal transport/detoxification protein // 1.8E-15 /// IPR008250 // E1-E2 ATPase-associated region // 1.8E-87 /// IPR005834 // Haloacid dehalogenase-like hydrolase …
6014	147213_at	0.50146	1.10878	6.69314	1.62e-07	1.71e-06	6.67258	FBgn0033952	CG10143	Adgf-E	Adenosine deaminase-related growth factor E	36627	4000 // adenosine deaminase activity // non-traceable author statement /// 8083 // growth factor activity // inferred from sequence or structural similarity /// 8083 // growth factor activity // non-traceable author statement /// 19239 // deaminase activity // inferred from electronic annotation /// 8083 // growth factor activity // inferred from sequence similarity	9168 // purine ribonucleoside monophosphate biosynthesis // inferred from electronic annotation	5576 // extracellular region // inferred from sequence or structural similarity /// 5576 // extracellular region // inferred from sequence similarity	IPR001365 // Adenosine/AMP deaminase // 3.1E-82
4677	145876_at	0.710345	1.45531	6.69219	1.62e-07	1.71e-06	6.66988	FBgn0031786	CG13989	CG13989	CG13989	33869	---	---	---	---
4244	145443_at	0.341892	0.0612901	6.6916	1.62e-07	1.71e-06	6.66821	FBgn0031133	CG12678	CG12678	CG12678	33065	---	---	---	---
13469	154668_at	0.522784	0.49992	6.68972	1.63e-07	1.72e-06	6.66289	FBgn0036451	CG9425	CG9425	CG9425	39613	166 // nucleotide binding // inferred from electronic annotation /// 3676 // nucleic acid binding // inferred from electronic annotation /// 3678 // DNA helicase activity // inferred from electronic annotation /// 4386 // helicase activity // inferred from electronic annotation /// 4812 // aminoacyl-tRNA ligase activity // inferred from electronic annotation /// 5524 // ATP binding // inferred fr…	6139 // nucleobase, nucleoside, nucleotide and nucleic acid metabolism // inferred from electronic annotation /// 6259 // DNA metabolism // inferred from electronic annotation /// 6260 // DNA replication // inferred from electronic annotation /// 6418 // tRNA aminoacylation for protein translation // inferred from electronic annotation /// 7049 // cell cycle // inferred from electronic annotation…	5634 // nucleus // inferred from electronic annotation	IPR000571 // Zn-finger, C-x8-C-x5-C-x3-H type // 1.5E-6
8497	149696_at	0.373355	0.990278	6.68587	1.65e-07	1.74e-06	6.65197	FBgn0037922	CG14711	CG14711	CG14711	41395	3676 // nucleic acid binding // inferred from electronic annotation /// 3677 // DNA binding // inferred from electronic annotation /// 8270 // zinc ion binding // inferred from electronic annotation /// 30528 // transcription regulator activity // inferred from electronic annotation	6139 // nucleobase, nucleoside, nucleotide and nucleic acid metabolism // inferred from electronic annotation /// 6357 // regulation of transcription from RNA polymerase II promoter // inferred from electronic annotation /// 6366 // transcription from RNA polymerase II promoter // inferred from electronic annotation /// 8283 // cell proliferation // inferred from electronic annotation	5634 // nucleus // inferred from electronic annotation	IPR007087 // Zn-finger, C2H2 type // 1.3E-4 /// IPR007087 // Zn-finger, C2H2 type // 4.7E-7 /// IPR007087 // Zn-finger, C2H2 type // 4.8E-5 /// IPR007087 // Zn-finger, C2H2 type // 4.2E-6
7037	148236_at	0.562417	0.568774	6.68402	1.66e-07	1.75e-06	6.64674	FBgn0035638	CG10541	Tektin-C	Tektin C	38653	5200 // structural constituent of cytoskeleton // inferred from electronic annotation /// 8017 // microtubule binding // inferred from sequence or structural similarity /// 8017 // microtubule binding // inferred from sequence similarity	226 // microtubule cytoskeleton organization and biogenesis // inferred from electronic annotation /// 7017 // microtubule-based process // inferred from sequence or structural similarity /// 7017 // microtubule-based process // inferred from sequence similarity	5874 // microtubule // inferred from electronic annotation /// 5875 // microtubule associated complex // inferred from sequence or structural similarity /// 5875 // microtubule associated complex // inferred from sequence similarity	IPR000435 // Tektin // 1.0E-126
3689	144888_at	0.584035	1.22839	6.68197	1.67e-07	1.76e-06	6.64093	FBgn0030319	CG2533	CG2533	CG2533	32110	---	---	---	---
11366	152565_at	0.732785	3.30949	6.67815	1.69e-07	1.77e-06	6.6301	FBgn0038294	CG6803	Zeelin1	Zeelin1	41824	---	30241 // muscle thick filament assembly // non-traceable author statement	---	---
7519	148718_at	0.36464	-0.0707117	6.67676	1.69e-07	1.78e-06	6.62618	FBgn0036373	CG10741	CG10741	CG10741	39521	---	---	---	---
9185	150384_at	0.725392	1.12962	6.67595	1.7e-07	1.78e-06	6.62386	FBgn0051161	CG31161	CG31161	CG31161	326123	---	---	---	---
2090	143289_at	0.621266	4.58053	6.66985	1.73e-07	1.81e-06	6.60659	FBgn0003034	CG17673	Acp70A	Accessory gland peptide 70A	39494	5179 // hormone activity // non-traceable author statement /// 5515 // protein binding // inferred from physical interaction	6718 // juvenile hormone biosynthesis // non-traceable author statement /// 7557 // regulation of juvenile hormone biosynthesis // traceable author statement /// 7621 // negative regulation of female receptivity // non-traceable author statement /// 7621 // negative regulation of female receptivity // traceable author statement /// 9993 // oogenesis (sensu Insecta) // traceable author statement /…	5576 // extracellular region // non-traceable author statement /// 5576 // extracellular region // traceable author statement	---
4202	145401_at	0.560805	0.536243	6.66455	1.75e-07	1.83e-06	6.59155	FBgn0031074	CG11942	skpE	skpE	32997	16944 // RNA polymerase II transcription elongation factor activity // inferred from sequence or structural similarity /// 19237 // centromeric DNA binding // inferred from electronic annotation /// 16944 // RNA polymerase II transcription elongation factor activity // inferred from sequence similarity	6508 // proteolysis // inferred from electronic annotation /// 7059 // chromosome segregation // inferred from electronic annotation /// 7067 // mitosis // inferred from electronic annotation	---	IPR001232 // SKP1 component // 3.9E-27 /// IPR001232 // SKP1 component // 8.3E-15
11033	152232_at	0.513823	2.51539	6.66204	1.76e-07	1.84e-06	6.58445	FBgn0033235	CG8728	CG8728	CG8728	35748	4240 // mitochondrial processing peptidase activity // inferred from sequence or structural similarity /// 4240 // mitochondrial processing peptidase activity // inferred from sequence similarity	6118 // electron transport // inferred from electronic annotation /// 6508 // proteolysis // inferred from electronic annotation /// 16485 // protein processing // inferred from sequence or structural similarity /// 16485 // protein processing // inferred from sequence similarity	5759 // mitochondrial matrix // inferred from sequence or structural similarity /// 5759 // mitochondrial matrix // inferred from sequence similarity	IPR007863 // Peptidase M16, C-terminal // 1.3E-43 /// IPR001431 // Peptidase M16, insulinase-like // 1.5E-40
12412	153611_at	1.8205	3.31206	6.66193	1.76e-07	1.84e-06	6.58413	FBgn0026170	CG4494	smt3	smt3	33981	5515 // protein binding // inferred from physical interaction /// 5515 // protein binding // inferred from sequence or structural similarity /// 5515 // protein binding // inferred from sequence similarity	6464 // protein modification // inferred from genetic interaction /// 6464 // protein modification // inferred from physical interaction /// 6464 // protein modification // inferred from sequence or structural similarity /// 6606 // protein import into nucleus // inferred from genetic interaction /// 6606 // protein import into nucleus // inferred from physical interaction /// 6916 // anti-apopto…	---	IPR000626 // Ubiquitin // 6.1E-13
6175	147374_at	0.470627	-0.171611	6.64864	1.83e-07	1.91e-06	6.54643	FBgn0034238	CG18432	CG18432	CG18432	36982	---	---	---	---
11890	153089_at	0.691499	2.04197	6.64509	1.85e-07	1.92e-06	6.53637	FBgn0032742	CG17492	mib2	mind bomb 2	35170	4842 // ubiquitin-protein ligase activity // inferred from electronic annotation /// 5057 // receptor signaling protein activity // inferred from electronic annotation /// 5102 // receptor binding // inferred from electronic annotation /// 8270 // zinc ion binding // inferred from electronic annotation /// 5515 // protein binding // inferred from electronic annotation	16567 // protein ubiquitination // inferred from electronic annotation	151 // ubiquitin ligase complex // inferred from electronic annotation	IPR002110 // Ankyrin // 3.8E-6 /// IPR002110 // Ankyrin // 5.6E-8 /// IPR002110 // Ankyrin // 5.6E-7 /// IPR002110 // Ankyrin // 0.0011 /// IPR002110 // Ankyrin // 1.8 /// IPR002110 // Ankyrin // 2.4E-8 /// IPR002110 // Ankyrin // 2.0E-5 /// IPR000433 // Zn-finger, ZZ type // 2.6E-8 /// IPR010606 // Mib_herc2 // 1.7E-35 /// IPR010606 // Mib_herc2 // 2.7E-33
13773	154972_at	0.443122	0.97847	6.64348	1.86e-07	1.93e-06	6.5318	FBgn0037664	CG8420	CG8420	CG8420	41097	---	---	---	---
6160	147359_at	0.564636	0.985401	6.63388	1.91e-07	1.98e-06	6.50457	FBgn0034205	CG10950	CG10950	CG10950	36942	8320 // protein carrier activity // inferred from sequence or structural similarity /// 5488 // binding // inferred from electronic annotation /// 8320 // protein carrier activity // inferred from sequence similarity	6606 // protein import into nucleus // inferred from sequence or structural similarity /// 6606 // protein import into nucleus // inferred from sequence similarity	---	---
4368	145567_at	0.514766	2.4799	6.62973	1.93e-07	2e-06	6.49279	FBgn0031323	CG5139	CG5139	CG5139	33309	---	---	---	---
10866	152065_at	1.0834	3.71769	6.62904	1.94e-07	2e-06	6.49084	FBgn0034144	CG5089	CG5089	CG5089	36859	---	---	---	---
9734	150933_at	0.342025	-0.297418	6.62731	1.95e-07	2.01e-06	6.48592	FBgn0051005	CG31005	CG31005	CG31005	43697	10 // trans-hexaprenyltranstransferase activity // inferred from sequence or structural similarity /// 8415 // acyltransferase activity // inferred from electronic annotation /// 10 // trans-hexaprenyltranstransferase activity // inferred from sequence similarity	8299 // isoprenoid biosynthesis // inferred from electronic annotation	---	IPR000092 // Polyprenyl synthetase // 5.2E-44
10726	151925_at	0.35694	1.13646	6.62296	1.97e-07	2.03e-06	6.47358	FBgn0038569	CG7218	CG7218	CG7218	42165	---	---	---	IPR008010 // Eukaryotic membrane protein DUF747 // 1.3E-50 /// IPR008010 // Eukaryotic membrane protein DUF747 // 1.0E-126
4442	145641_s_at	0.502164	0.841053	6.62051	1.98e-07	2.04e-06	6.46661	FBgn0031426	CG18641	CG18641	CG18641	33429	16298 // lipase activity // inferred from sequence or structural similarity /// 16298 // lipase activity // inferred from sequence similarity	6629 // lipid metabolism // inferred from electronic annotation	---	IPR000734 // Lipase // 9.0E-32
11540	152739_at	0.759918	1.33379	6.6186	1.99e-07	2.05e-06	6.4612	---	CG15891 /// CG15892	---	---	---	---	---	---	---
958	142157_at	0.877703	0.974466	6.61748	2e-07	2.06e-06	6.45801	FBgn0038277	CG7014	RpS5b	Ribosomal protein S5b	41807	3676 // nucleic acid binding // inferred from electronic annotation /// 3735 // structural constituent of ribosome // inferred from sequence or structural similarity /// 3735 // structural constituent of ribosome // inferred from electronic annotation /// 3735 // structural constituent of ribosome // inferred from sequence similarity	6412 // protein biosynthesis // inferred from sequence or structural similarity /// 6412 // protein biosynthesis // inferred from electronic annotation /// 6412 // protein biosynthesis // inferred from sequence similarity	5843 // cytosolic small ribosomal subunit (sensu Eukaryota) // inferred from sequence or structural similarity /// 5622 // intracellular // inferred from electronic annotation /// 5840 // ribosome // inferred from electronic annotation /// 15935 // small ribosomal subunit // inferred from electronic annotation /// 30529 // ribonucleoprotein complex // inferred from electronic annotation /// 5843 …	IPR000235 // Ribosomal protein S7 // 7.2E-71
11356	152555_at	0.717341	2.63268	6.61487	2.02e-07	2.07e-06	6.45061	FBgn0003149	CG5939	Prm	Paramyosin	39002	3774 // motor activity // non-traceable author statement /// 5200 // structural constituent of cytoskeleton // inferred from electronic annotation /// 8092 // cytoskeletal protein binding // inferred from electronic annotation /// 8307 // structural constituent of muscle // inferred from sequence or structural similarity /// 8307 // structural constituent of muscle // non-traceable author stateme…	7498 // mesoderm development // inferred from expression pattern /// 6941 // striated muscle contraction // inferred from electronic annotation	5863 // striated muscle thick filament // non-traceable author statement /// 16459 // myosin // inferred from electronic annotation /// 5863 // striated muscle thick filament // inferred from electronic annotation	IPR002928 // Myosin tail // 1.0E-126 /// IPR002928 // Myosin tail // 1.0E-126
6746	147945_at	0.39599	-0.148469	6.60778	2.06e-07	2.11e-06	6.43049	FBgn0035168	CG13889	CG13889	CG13889	38099	4601 // peroxidase activity // inferred from electronic annotation /// 5200 // structural constituent of cytoskeleton // inferred from electronic annotation	6979 // response to oxidative stress // inferred from electronic annotation	---	---
11145	152344_at	0.593496	1.51328	6.60785	2.06e-07	2.11e-06	6.43068	FBgn0027795	CG14785	CG14785	CG14785	31094	---	---	---	---
5149	146348_at	0.485884	0.272357	6.60376	2.08e-07	2.13e-06	6.41907	FBgn0032535	CG16869	Ance-2	Ance-2	34806	4246 // peptidyl-dipeptidase A activity // inferred from electronic annotation /// 8241 // peptidyl-dipeptidase activity // non-traceable author statement	6508 // proteolysis // inferred from electronic annotation	16020 // membrane // inferred from electronic annotation	IPR001548 // Peptidase M2, peptidyl-dipeptidase A // 3.8E-11 /// IPR001548 // Peptidase M2, peptidyl-dipeptidase A // 6.6E-16
7209	148408_at	0.45719	0.163304	6.604	2.08e-07	2.13e-06	6.41975	FBgn0035902	CG6683	CG6683	CG6683	38970	5515 // protein binding // inferred from physical interaction /// 42802 // identical protein binding // inferred from physical interaction	---	---	---
8367	149566_at	0.50276	0.360098	6.60086	2.1e-07	2.14e-06	6.41083	FBgn0037712	CG16789	CG16789	CG16789	41154	166 // nucleotide binding // inferred from electronic annotation /// 5524 // ATP binding // inferred from electronic annotation	---	---	IPR000048 // IQ calmodulin-binding region // 1.7E-5
3296	144495_at	0.427539	1.13583	6.59425	2.14e-07	2.18e-06	6.39206	FBgn0029729	CG12682	CG12682	CG12682	31415	---	---	---	---
9000	150199_at	0.553416	1.02796	6.59432	2.14e-07	2.18e-06	6.39224	FBgn0038709	CG15025	CG15025	CG15025	42328	5515 // protein binding // inferred from physical interaction	---	---	---
1244	142443_at	0.367929	0.155431	6.58985	2.16e-07	2.2e-06	6.37955	FBgn0029979	CG10777	CG10777	CG10777	31707	3676 // nucleic acid binding // inferred from electronic annotation /// 3724 // RNA helicase activity // inferred from sequence or structural similarity /// 5524 // ATP binding // inferred from electronic annotation /// 8026 // ATP-dependent helicase activity // inferred from electronic annotation /// 5515 // protein binding // inferred from physical interaction /// 166 // nucleotide binding // i…	6139 // nucleobase, nucleoside, nucleotide and nucleic acid metabolism // inferred from electronic annotation	---	IPR001650 // Helicase, C-terminal // 3.1E-36 /// IPR001410 // DEAD/DEAH box helicase // 3.7E-82
4969	146168_at	0.455914	0.377257	6.58833	2.17e-07	2.21e-06	6.37522	FBgn0051721	CG31721	Trim9	Trim9	34453	4842 // ubiquitin-protein ligase activity // inferred from electronic annotation /// 8270 // zinc ion binding // inferred from electronic annotation /// 5515 // protein binding // inferred from electronic annotation	16567 // protein ubiquitination // inferred from electronic annotation	151 // ubiquitin ligase complex // inferred from electronic annotation /// 5622 // intracellular // inferred from electronic annotation	IPR000315 // Zn-finger, B-box // 1.0E-6 /// IPR003961 // Fibronectin, type III // 5.5E-8 /// IPR003877 // SPla/RYanodine receptor SPRY // 1.4E-29
9250	150449_at	0.616528	1.43068	6.58471	2.19e-07	2.23e-06	6.36495	FBgn0039083	CG10177	CG10177	CG10177	42772	4674 // protein serine/threonine kinase activity // inferred from sequence or structural similarity /// 4674 // protein serine/threonine kinase activity // non-traceable author statement /// 5524 // ATP binding // inferred from electronic annotation /// 166 // nucleotide binding // inferred from electronic annotation /// 4672 // protein kinase activity // inferred from electronic annotation /// 4…	6468 // protein amino acid phosphorylation // non-traceable author statement /// 7165 // signal transduction // inferred from electronic annotation /// 7242 // intracellular signaling cascade // inferred from electronic annotation /// 6468 // protein amino acid phosphorylation // inferred from electronic annotation /// 30154 // cell differentiation // inferred from electronic annotation	---	IPR003533 // Doublecortin // 2.8E-24 /// IPR000719 // Protein kinase // 9.3E-57
1356	142555_at	0.969499	1.70368	6.57675	2.24e-07	2.28e-06	6.34234	FBgn0004169	CG7107	up	upheld	32314	5523 // tropomyosin binding // inferred from sequence or structural similarity /// 5523 // tropomyosin binding // non-traceable author statement /// 5523 // tropomyosin binding // inferred from sequence similarity	7498 // mesoderm development // inferred from expression pattern	5861 // troponin complex // inferred from sequence or structural similarity /// 5861 // troponin complex // non-traceable author statement /// 5861 // troponin complex // inferred from sequence similarity	IPR001978 // Troponin // 9.1E-62 /// IPR001978 // Troponin // 9.1E-62 /// IPR001978 // Troponin // 9.1E-62 /// IPR001978 // Troponin // 1.1E-57 /// IPR001978 // Troponin // 1.1E-57 /// IPR001978 // Troponin // 9.1E-62 /// IPR001978 // Troponin // 1.5E-50
4872	146071_at	0.477714	-0.0665251	6.57563	2.25e-07	2.28e-06	6.33914	FBgn0052982	CG32982	CG32982	CG32982	34237	---	---	---	IPR001849 // Pleckstrin-like // 9.6E-10 /// IPR001849 // Pleckstrin-like // 9.6E-10
1075	142274_at	0.781335	1.76984	6.57098	2.28e-07	2.3e-06	6.32593	FBgn0035568	CG18418	CG18418	CG18418	38572	5386 // carrier activity // inferred from sequence or structural similarity /// 5488 // binding // inferred from electronic annotation /// 15367 // oxoglutarate:malate antiporter activity // inferred from sequence or structural similarity /// 5215 // transporter activity // inferred from electronic annotation /// 5386 // carrier activity // inferred from sequence similarity /// 15367 // oxoglutar…	6812 // cation transport // inferred from electronic annotation /// 6839 // mitochondrial transport // inferred from sequence or structural similarity /// 15742 // alpha-ketoglutarate transport // inferred from sequence or structural similarity /// 15743 // malate transport // inferred from sequence or structural similarity /// 6810 // transport // inferred from electronic annotation /// 6839 // …	5740 // mitochondrial envelope // inferred from sequence or structural similarity /// 5743 // mitochondrial inner membrane // inferred from sequence or structural similarity /// 5739 // mitochondrion // inferred from electronic annotation /// 5743 // mitochondrial inner membrane // inferred from electronic annotation /// 16020 // membrane // inferred from electronic annotation /// 16021 // integr…	IPR001993 // Mitochondrial substrate carrier // 8.4E-30 /// IPR001993 // Mitochondrial substrate carrier // 1.4E-28 /// IPR001993 // Mitochondrial substrate carrier // 4.7E-29
9420	150619_at	0.594341	0.474529	6.56623	2.31e-07	2.33e-06	6.31243	FBgn0039376	CG14354	CG14354	CG14354	43120	5515 // protein binding // inferred from physical interaction	---	---	IPR007999 // Protein of unknown function DUF745 // 2.3E-118
4032	145231_at	0.457006	0.751694	6.56516	2.32e-07	2.34e-06	6.30938	FBgn0016080	CG32561	xmas-1	xmas-1	44660	---	7283 // spermatogenesis // non-traceable author statement /// 9790 // embryonic development // non-traceable author statement /// 9993 // oogenesis (sensu Insecta) // non-traceable author statement	---	---
11317	152516_at	0.652764	2.97265	6.56276	2.33e-07	2.35e-06	6.30258	FBgn0037939	CG14718	CG14718	CG14718	41413	3729 // mRNA binding // inferred from sequence or structural similarity /// 166 // nucleotide binding // inferred from electronic annotation /// 3676 // nucleic acid binding // inferred from electronic annotation /// 8270 // zinc ion binding // inferred from electronic annotation /// 3729 // mRNA binding // inferred from sequence similarity	---	---	IPR001876 // Zn-finger, Ran-binding // 1.5E-4 /// IPR001876 // Zn-finger, Ran-binding // 1.1E-5 /// IPR000504 // RNA-binding region RNP-1 (RNA recognition motif) // 5.3E-13
11465	152664_at	0.543497	1.41104	6.55928	2.36e-07	2.36e-06	6.29267	FBgn0039491	CG6059	CG6059	CG6059	43270	5200 // structural constituent of cytoskeleton // inferred from electronic annotation	7010 // cytoskeleton organization and biogenesis // inferred from electronic annotation	---	---
5867	147066_at	0.454786	0.904922	6.55894	2.36e-07	2.36e-06	6.29172	FBgn0033697	CG8457	Cyp6t3	Cyp6t3	36318	4497 // monooxygenase activity // inferred from electronic annotation /// 16491 // oxidoreductase activity // inferred from electronic annotation /// 5506 // iron ion binding // inferred from electronic annotation /// 20037 // heme binding // inferred from electronic annotation /// 46872 // metal ion binding // inferred from electronic annotation	6118 // electron transport // inferred from electronic annotation	5792 // microsome // non-traceable author statement /// 16020 // membrane // non-traceable author statement	IPR001128 // Cytochrome P450 // 1.0E-56 /// IPR001128 // Cytochrome P450 // 9.7E-48
1778	142977_at	1.56413	1.12374	6.55455	2.39e-07	2.39e-06	6.27923	FBgn0030086	CG7033	CG7033	CG7033	31838	3676 // nucleic acid binding // inferred from electronic annotation /// 5524 // ATP binding // inferred from electronic annotation /// 8026 // ATP-dependent helicase activity // inferred from electronic annotation /// 42623 // ATPase activity, coupled // inferred from electronic annotation /// 51082 // unfolded protein binding // inferred from electronic annotation /// 5515 // protein binding // …	6457 // protein folding // inferred from electronic annotation /// 6457 // protein folding // inferred from sequence or structural similarity /// 44267 // cellular protein metabolism // inferred from electronic annotation /// 6457 // protein folding // inferred from sequence similarity	5832 // chaperonin-containing T-complex // inferred from sequence or structural similarity /// 5832 // chaperonin-containing T-complex // inferred from sequence similarity	IPR002423 // Chaperonin Cpn60/TCP-1 // 1.0E-126 /// IPR002423 // Chaperonin Cpn60/TCP-1 // 1.0E-126
5741	146940_at	0.938377	3.24489	6.55366	2.4e-07	2.39e-06	6.2767	FBgn0033512	CG12902	CG12902	CG12902	36092	---	---	---	---
342	141541_at	0.877376	6.0223	6.54342	2.47e-07	2.46e-06	6.24757	FBgn0034501	CG13868	CG13868	CG13868	37302	---	---	---	---
8121	149320_at	0.379574	1.20051	6.53975	2.49e-07	2.48e-06	6.23714	FBgn0037310	CG1158	Tim17b1	Tim17b1	40635	15450 // protein translocase activity // inferred from sequence or structural similarity /// 8565 // protein transporter activity // inferred from electronic annotation /// 15450 // protein translocase activity // inferred from sequence similarity	6626 // protein targeting to mitochondrion // inferred from sequence or structural similarity /// 15031 // protein transport // inferred from sequence or structural similarity /// 6605 // protein targeting // inferred from electronic annotation /// 6810 // transport // inferred from electronic annotation /// 15031 // protein transport // inferred from electronic annotation /// 6626 // protein tar…	5744 // mitochondrial inner membrane presequence translocase complex // inferred from sequence or structural similarity /// 5739 // mitochondrion // inferred from electronic annotation /// 5743 // mitochondrial inner membrane // inferred from electronic annotation /// 16020 // membrane // inferred from electronic annotation /// 16021 // integral to membrane // inferred from electronic annotation …	IPR003397 // Mitochondrial import inner membrane translocase, subunit Tim17/22 // 9.1E-59
3736	144935_at	0.744127	0.255841	6.53876	2.5e-07	2.48e-06	6.23432	FBgn0030388	CG11245	CG11245	CG11245	32192	---	---	---	---
8021	149220_at	0.3757	0.525366	6.53702	2.51e-07	2.5e-06	6.22936	FBgn0037149	CG14561	CG14561	CG14561	40447	---	---	---	---
3272	144471_at	0.618053	1.57646	6.53655	2.51e-07	2.5e-06	6.22803	FBgn0029700	CG15576	CG15576	CG15576	31369	---	---	---	---
11517	152716_at	0.798217	2.08853	6.53257	2.54e-07	2.52e-06	6.21671	FBgn0035007	CG3492	CG3492	CG3492	37902	51082 // unfolded protein binding // inferred from sequence or structural similarity /// 5515 // protein binding // inferred from physical interaction /// 3755 // peptidyl-prolyl cis-trans isomerase activity // inferred from electronic annotation /// 16853 // isomerase activity // inferred from electronic annotation /// 51082 // unfolded protein binding // inferred from sequence similarity	6457 // protein folding // inferred from sequence or structural similarity /// 6457 // protein folding // inferred from electronic annotation /// 6457 // protein folding // inferred from sequence similarity	---	IPR002130 // Peptidyl-prolyl cis-trans isomerase, cyclophilin type // 6.7E-4
3263	144462_at	0.387854	-0.152893	6.52479	2.6e-07	2.58e-06	6.19459	FBgn0052778	CG32778	CG32778	CG32778	31353	3700 // transcription factor activity // inferred from sequence or structural similarity /// 5524 // ATP binding // inferred from electronic annotation /// 46933 // hydrogen-transporting ATP synthase activity, rotational mechanism // inferred from electronic annotation /// 46961 // hydrogen-transporting ATPase activity, rotational mechanism // inferred from electronic annotation /// 3700 // trans…	6355 // regulation of transcription, DNA-dependent // inferred from sequence or structural similarity /// 6357 // regulation of transcription from RNA polymerase II promoter // inferred from electronic annotation /// 15986 // ATP synthesis coupled proton transport // inferred from electronic annotation /// 6355 // regulation of transcription, DNA-dependent // inferred from sequence similarity	5634 // nucleus // inferred from sequence or structural similarity /// 16469 // proton-transporting two-sector ATPase complex // inferred from electronic annotation /// 5634 // nucleus // inferred from sequence similarity	IPR002515 // Zn-finger, C2HC type // 5.8E-15 /// IPR002515 // Zn-finger, C2HC type // 1.7E-18 /// IPR002515 // Zn-finger, C2HC type // 4.3E-16
3302	144501_at	1.01884	1.18377	6.52488	2.6e-07	2.58e-06	6.19485	FBgn0029738	CG4068	CG4068	CG4068	31424	---	---	---	---
12112	153311_at	0.621073	4.65301	6.52051	2.63e-07	2.6e-06	6.18241	FBgn0001220	CG8542	Hsc70-5	Heat shock protein cognate 5	36583	5524 // ATP binding // inferred from electronic annotation /// 16887 // ATPase activity // non-traceable author statement /// 51082 // unfolded protein binding // inferred from sequence or structural similarity /// 5515 // protein binding // inferred from physical interaction /// 166 // nucleotide binding // inferred from electronic annotation /// 51082 // unfolded protein binding // inferred fro…	6457 // protein folding // inferred from electronic annotation /// 6457 // protein folding // inferred from sequence or structural similarity /// 6626 // protein targeting to mitochondrion // inferred from electronic annotation /// 6952 // defense response // inferred from electronic annotation /// 9408 // response to heat // non-traceable author statement /// 6986 // response to unfolded protein…	5739 // mitochondrion // inferred from sequence or structural similarity /// 5739 // mitochondrion // non-traceable author statement /// 5739 // mitochondrion // inferred from sequence similarity	IPR001023 // Heat shock protein Hsp70 // 1.0E-126
388	141587_at	0.68522	2.33581	6.51868	2.64e-07	2.61e-06	6.17719	FBgn0033460	CG1472	CG1472	CG1472	36025	5515 // protein binding // inferred from electronic annotation /// 8270 // zinc ion binding // inferred from electronic annotation	6886 // intracellular protein transport // inferred from electronic annotation /// 6888 // ER to Golgi vesicle-mediated transport // inferred from sequence or structural similarity /// 6888 // ER to Golgi vesicle-mediated transport // inferred from electronic annotation /// 6888 // ER to Golgi vesicle-mediated transport // inferred from sequence similarity	30127 // COPII vesicle coat // inferred from electronic annotation	IPR006895 // Sec23/Sec24 zinc finger // 4.2E-19 /// IPR007123 // Gelsolin region // 1.2E-16 /// IPR006900 // Sec23/Sec24 helical domain // 3.1E-45 /// IPR006896 // Sec23/Sec24 trunk domain // 9.8E-126
6989	148188_at	0.756603	0.584194	6.51368	2.68e-07	2.65e-06	6.16297	FBgn0052245	CG32245	CG32245	CG32245	38562	5200 // structural constituent of cytoskeleton // inferred from electronic annotation	7010 // cytoskeleton organization and biogenesis // inferred from electronic annotation	16020 // membrane // inferred from sequence or structural similarity /// 16020 // membrane // inferred from electronic annotation /// 16020 // membrane // inferred from sequence similarity	IPR001107 // Band 7 protein // 3.5E-85
1100	142299_at	0.318101	-0.000926579	6.50946	2.71e-07	2.68e-06	6.15097	FBgn0050184	CG30184	CG30184	CG30184	246506	4623 // phospholipase A2 activity // inferred from electronic annotation /// 5509 // calcium ion binding // inferred from electronic annotation	5975 // carbohydrate metabolism // inferred from electronic annotation /// 16042 // lipid catabolism // inferred from electronic annotation	---	---
11222	152421_at	0.868173	1.93271	6.50865	2.72e-07	2.68e-06	6.14865	FBgn0038163	CG10841	CG10841	CG10841	41665	5509 // calcium ion binding // inferred from electronic annotation	---	---	---
11758	152957_at	1.1018	2.4403	6.50624	2.74e-07	2.7e-06	6.14179	FBgn0052103	CG32103	CG32103	CG32103	39415	5386 // carrier activity // inferred from sequence or structural similarity /// 5488 // binding // inferred from electronic annotation /// 5509 // calcium ion binding // inferred from electronic annotation /// 5386 // carrier activity // inferred from sequence similarity	6810 // transport // inferred from sequence or structural similarity /// 6812 // cation transport // inferred from electronic annotation /// 6810 // transport // inferred from electronic annotation /// 6810 // transport // inferred from sequence similarity	5740 // mitochondrial envelope // inferred from sequence or structural similarity /// 5743 // mitochondrial inner membrane // inferred from electronic annotation /// 5778 // peroxisomal membrane // inferred from sequence or structural similarity /// 16020 // membrane // inferred from electronic annotation /// 16021 // integral to membrane // inferred from electronic annotation /// 5740 // mitocho…	IPR001993 // Mitochondrial substrate carrier // 4.5E-31 /// IPR001993 // Mitochondrial substrate carrier // 1.9E-35 /// IPR001993 // Mitochondrial substrate carrier // 2.2E-24 /// IPR001993 // Mitochondrial substrate carrier // 4.5E-31 /// IPR001993 // Mitochondrial substrate carrier // 1.9E-35 /// IPR001993 // Mitochondrial substrate carrier // 2.2E-24 /// IPR002048 // Calcium-binding EF-hand //…
10278	151477_at	0.494813	1.44975	6.50548	2.75e-07	2.7e-06	6.13963	FBgn0031737	CG11142	CG11142	CG11142	33806	8061 // chitin binding // inferred from electronic annotation /// 16490 // structural constituent of peritrophic membrane (sensu Insecta) // inferred from sequence or structural similarity /// 5515 // protein binding // inferred from physical interaction /// 16490 // structural constituent of peritrophic membrane (sensu Insecta) // inferred from sequence similarity	6030 // chitin metabolism // inferred from electronic annotation	5576 // extracellular region // inferred from electronic annotation	IPR002557 // Chitin binding Peritrophin-A // 2.2E-10 /// IPR002557 // Chitin binding Peritrophin-A // 8.0E-14 /// IPR002557 // Chitin binding Peritrophin-A // 1.7E-12
6484	147683_at	0.653215	0.254876	6.50475	2.75e-07	2.71e-06	6.13755	FBgn0034738	CG12489	Dnr1	Defense repressor 1	37575	4842 // ubiquitin-protein ligase activity // inferred from electronic annotation /// 5200 // structural constituent of cytoskeleton // inferred from electronic annotation /// 8270 // zinc ion binding // inferred from electronic annotation /// 5488 // binding // inferred from electronic annotation /// 5515 // protein binding // inferred from electronic annotation	6955 // immune response // inferred from mutant phenotype /// 16567 // protein ubiquitination // inferred from electronic annotation /// 19226 // transmission of nerve impulse // inferred from electronic annotation	151 // ubiquitin ligase complex // inferred from electronic annotation /// 5856 // cytoskeleton // inferred from electronic annotation	IPR000299 // Band 4.1 // 2.5E-5
6966	148165_at	1.06872	1.33697	6.50312	2.76e-07	2.71e-06	6.1329	FBgn0035526	CG1316	CG1316	CG1316	38526	3729 // mRNA binding // inferred from sequence or structural similarity /// 5515 // protein binding // inferred from physical interaction /// 166 // nucleotide binding // inferred from electronic annotation /// 3676 // nucleic acid binding // inferred from electronic annotation /// 3729 // mRNA binding // inferred from sequence similarity	---	---	IPR000504 // RNA-binding region RNP-1 (RNA recognition motif) // 4.5E-17 /// IPR000504 // RNA-binding region RNP-1 (RNA recognition motif) // 1.2E-12 /// IPR000504 // RNA-binding region RNP-1 (RNA recognition motif) // 8.6E-6 /// IPR000504 // RNA-binding region RNP-1 (RNA recognition motif) // 5.8E-9
7895	149094_at	0.481098	1.51541	6.49878	2.8e-07	2.74e-06	6.12056	FBgn0036941	CG7335	CG7335	CG7335	40203	4454 // ketohexokinase activity // inferred from sequence or structural similarity /// 4454 // ketohexokinase activity // inferred from sequence similarity	5996 // monosaccharide metabolism // inferred from electronic annotation	---	IPR002173 // Carbohydrate kinase, PfkB // 4.1E-10 /// IPR002173 // Carbohydrate kinase, PfkB // 6.4E-5
11561	152760_at	0.767278	2.75076	6.49343	2.84e-07	2.78e-06	6.10531	FBgn0026563	CG1979	CG1979	CG1979	40837	---	---	---	---
13121	154320_at	0.840451	1.36085	6.49155	2.86e-07	2.79e-06	6.09996	FBgn0001291	CG2275	Jra	Jun-related antigen	36057	3677 // DNA binding // inferred from electronic annotation /// 3700 // transcription factor activity // inferred from electronic annotation /// 3702 // RNA polymerase II transcription factor activity // inferred from sequence or structural similarity /// 3704 // specific RNA polymerase II transcription factor activity // non-traceable author statement /// 5515 // protein binding // inferred from …	165 // MAPKKK cascade // traceable author statement /// 1736 // establishment of planar polarity // non-traceable author statement /// 6357 // regulation of transcription from RNA polymerase II promoter // non-traceable author statement /// 7254 // JNK cascade // inferred from genetic interaction /// 7254 // JNK cascade // inferred from mutant phenotype /// 7254 // JNK cascade // traceable author…	5634 // nucleus // inferred from direct assay /// 5634 // nucleus // inferred from sequence or structural similarity /// 5634 // nucleus // non-traceable author statement /// 5737 // cytoplasm // inferred from direct assay /// 5634 // nucleus // inferred from electronic annotation /// 5634 // nucleus // inferred from sequence similarity	IPR004827 // Basic-leucine zipper (bZIP) transcription factor // 8.7E-26 /// IPR005643 // Jun-like transcription factor // 9.6E-107
9121	150320_at	0.308963	-0.57314	6.48855	2.88e-07	2.81e-06	6.09144	FBgn0051176	CG31176	CG31176	CG31176	42554	---	---	---	---
3469	144668_at	0.566358	0.712282	6.48391	2.92e-07	2.84e-06	6.07822	FBgn0029985	CG1531	CG1531	CG1531	31713	---	---	---	IPR001841 // Zn-finger, RING // 4.9E-8
[truncated: 1,772 more rows]
