# Supplementary material for: Gene expression changes in response to aging compared to heat stress, oxidative stress and ionizing radiation in Drosophila melanogaster
Source: Aging (Albany NY). 2012 Nov 30;4(11):768–89. doi: 10.18632/aging.100499 (PMC3560439; doi:10.18632/aging.100499)
Supplement: Supplementary file 14 [file aging-04-768-s014.xlsx]

## Sheet: TableS4j.HSdown
Table S4j. HS down
ID	M	A	t	P.Value	adj.P.Val	B	FlyBase	Ensembl	Gene.Symbol	Gene.Title	Entrez.Gene	Gene.Ontology.Molecular.Function	Gene.Ontology.Biological.Process	Gene.Ontology.Cellular.Component	InterPro
10997	152196_at	-2.0426	1.82689	-25.891	8.95e-23	4.71e-20	41.9804	FBgn0027562	CG10345	CG10345	CG10345	42017	5044 // scavenger receptor activity // non-traceable author statement	6915 // apoptosis // inferred from electronic annotation /// 6952 // defense response // non-traceable author statement /// 7155 // cell adhesion // inferred from electronic annotation	5887 // integral to plasma membrane // non-traceable author statement /// 16020 // membrane // inferred from electronic annotation	IPR002159 // CD36 antigen // 1.8E-30 /// IPR002159 // CD36 antigen // 2.3E-21
11727	152926_at	-2.11036	5.84378	-21.2881	3.05e-20	8.92e-18	36.2149	FBgn0040992	CG10570	CG10570	CG10570	50466	5515 // protein binding // inferred from physical interaction	---	---	---
7479	148678_at	-1.93436	1.54758	-20.9886	4.64e-20	1.3e-17	35.7995	FBgn0036321	CG14120	CG14120	CG14120	39463	---	---	---	IPR001604 // DNA/RNA non-specific endonuclease // 7.9E-29 /// IPR001604 // DNA/RNA non-specific endonuclease // 1.8E-14 /// IPR001604 // DNA/RNA non-specific endonuclease // 5.3E-34
11832	153031_at	-1.7378	4.16232	-20.3048	1.23e-19	3.07e-17	34.8304	FBgn0038037	CG11466	Cyp9f2	Cyp9f2	41520	4497 // monooxygenase activity // inferred from electronic annotation /// 16491 // oxidoreductase activity // inferred from electronic annotation /// 5506 // iron ion binding // inferred from electronic annotation /// 20037 // heme binding // inferred from electronic annotation /// 46872 // metal ion binding // inferred from electronic annotation	6118 // electron transport // inferred from electronic annotation	5792 // microsome // non-traceable author statement /// 16020 // membrane // non-traceable author statement /// 5783 // endoplasmic reticulum // inferred from electronic annotation /// 5792 // microsome // inferred from electronic annotation /// 16020 // membrane // inferred from electronic annotation	IPR001128 // Cytochrome P450 // 1.5E-76 /// IPR001128 // Cytochrome P450 // 1.5E-79
11269	152468_at	-1.85118	1.84541	-20.1171	1.61e-19	3.76e-17	34.559	FBgn0051199	CG31199	CG31199	CG31199	42456	4252 // serine-type endopeptidase activity // non-traceable author statement /// 4295 // trypsin activity // inferred from electronic annotation /// 4252 // serine-type endopeptidase activity // inferred from electronic annotation	6508 // proteolysis // inferred from electronic annotation	---	IPR001254 // Peptidase S1, chymotrypsin // 1.5E-8
8637	149836_at	-1.40029	2.22601	-20.0062	1.89e-19	4.27e-17	34.3977	FBgn0038142	CG14379	CheA87a	CheA87a	41642	---	---	---	---
6345	147544_at	-1.88981	4.01551	-19.8191	2.49e-19	5.53e-17	34.1235	FBgn0034509	CG13421	Obp57c	Odorant-binding protein 57c	37311	5549 // odorant binding // inferred from electronic annotation /// 5549 // odorant binding // inferred from sequence or structural similarity /// 5549 // odorant binding // non-traceable author statement /// 5549 // odorant binding // inferred from sequence similarity	6810 // transport // inferred from electronic annotation /// 7606 // sensory perception of chemical stimulus // inferred from sequence or structural similarity /// 7608 // sensory perception of smell // inferred from electronic annotation /// 50896 // response to stimulus // inferred from electronic annotation /// 6810 // transport // non-traceable author statement /// 7606 // sensory perception …	---	IPR006170 // Pheromone/general odorant binding protein, PBP/GOBP // 1.4E-25
10887	152086_at	-1.85359	4.3536	-19.6571	3.16e-19	6.71e-17	33.8843	FBgn0036106	CG6409	CG6409	CG6409	39220	---	6506 // GPI anchor biosynthesis // inferred from sequence or structural similarity /// 6506 // GPI anchor biosynthesis // inferred from sequence similarity	5783 // endoplasmic reticulum // inferred from sequence or structural similarity /// 5783 // endoplasmic reticulum // inferred from sequence similarity	---
2901	144100_at	-1.73499	2.73546	-19.3957	4.67e-19	9.76e-17	33.4946	FBgn0025827	CG6421	CG6421	CG6421	46813	5509 // calcium ion binding // inferred from electronic annotation	6952 // defense response // inferred from electronic annotation /// 42742 // defense response to bacteria // inferred from electronic annotation	---	IPR008597 // Destabilase // 2.0E-78
9585	150784_at	-1.37113	1.00329	-18.9427	9.27e-19	1.83e-16	32.8077	FBgn0039598	CG14061	CG14061	CG14061	43396	4252 // serine-type endopeptidase activity // inferred from electronic annotation	6508 // proteolysis // inferred from electronic annotation	---	---
1003	142202_at	-2.15839	3.05181	-18.3905	2.18e-18	4.19e-16	31.9505	FBgn0034664	CG4377	CG4377	CG4377	37489	---	---	---	IPR008472 // Protein of unknown function DUF753 // 9.1E-78
8952	150151_at	-2.29998	2.99004	-18.2558	2.7e-18	5.11e-16	31.738	FBgn0038631	CG7695	CG7695	CG7695	42234	---	---	---	---
4453	145652_at	-1.32488	3.05729	-17.9295	4.53e-18	7.84e-16	31.2173	FBgn0031439	CG15394	CG15394	CG15394	33446	---	---	---	---
7825	149024_at	-1.3107	1.46463	-17.5877	7.87e-18	1.31e-15	30.6631	FBgn0036833	CG3819	CG3819	CG3819	40069	5515 // protein binding // inferred from physical interaction /// 3676 // nucleic acid binding // inferred from electronic annotation /// 4519 // endonuclease activity // inferred from electronic annotation	---	---	IPR001604 // DNA/RNA non-specific endonuclease // 3.8E-88
9034	150233_at	-1.86156	3.81077	-17.5417	8.48e-18	1.4e-15	30.5878	FBgn0038756	CG4783	CG4783	CG4783	42381	---	---	---	---
5816	147015_at	-1.29921	1.58957	-17.176	1.55e-17	2.52e-15	29.9831	FBgn0043471	CG12388	Try	Try	36215	4252 // serine-type endopeptidase activity // non-traceable author statement /// 4263 // chymotrypsin activity // inferred from electronic annotation /// 4295 // trypsin activity // inferred from electronic annotation	6508 // proteolysis // inferred from electronic annotation	---	IPR001254 // Peptidase S1, chymotrypsin // 4.3E-67
10102	151301_at	-1.76571	5.35617	-16.8556	2.65e-17	4.26e-15	29.4444	FBgn0040827	CG13315	CG13315	CG13315	50300	---	---	---	---
10513	151712_at	-1.08119	1.11648	-16.8304	2.76e-17	4.4e-15	29.4016	FBgn0031097	CG17052	CG17052	CG17052	33022	8061 // chitin binding // inferred from electronic annotation /// 16490 // structural constituent of peritrophic membrane (sensu Insecta) // inferred from sequence or structural similarity /// 16490 // structural constituent of peritrophic membrane (sensu Insecta) // inferred from sequence similarity	6030 // chitin metabolism // inferred from electronic annotation	5576 // extracellular region // inferred from electronic annotation	IPR002557 // Chitin binding Peritrophin-A // 7.6E-17 /// IPR002557 // Chitin binding Peritrophin-A // 4.0E-17 /// IPR002557 // Chitin binding Peritrophin-A // 2.7E-13
1160	142359_at	-2.65424	3.3017	-16.8196	2.81e-17	4.43e-15	29.3834	FBgn0050360	CG30360	CG30360	CG30360	246565	4556 // alpha-amylase activity // inferred from electronic annotation /// 5215 // transporter activity // inferred from electronic annotation /// 15926 // glucosidase activity // inferred from electronic annotation /// 16787 // hydrolase activity // inferred from electronic annotation	5975 // carbohydrate metabolism // inferred from electronic annotation	---	IPR006047 // Alpha amylase, catalytic domain // 3.4E-96 /// IPR006047 // Alpha amylase, catalytic domain // 4.6E-16 /// IPR006047 // Alpha amylase, catalytic domain // 3.0E-119
8104	149303_at	-1.79003	2.65474	-16.8016	2.9e-17	4.46e-15	29.3528	FBgn0037288	CG14661	CG14661	CG14661	40611	---	---	---	IPR004272 // Odorant binding protein // 1.1E-48
6036	147235_at	-2.06471	1.98876	-16.7372	3.23e-17	4.92e-15	29.2431	FBgn0033999	CG8093	CG8093	CG8093	36686	4806 // triacylglycerol lipase activity // inferred from sequence or structural similarity /// 16298 // lipase activity // inferred from sequence or structural similarity /// 5515 // protein binding // inferred from physical interaction /// 3824 // catalytic activity // inferred from electronic annotation /// 16787 // hydrolase activity // inferred from electronic annotation /// 16789 // carboxyl…	6629 // lipid metabolism // inferred from electronic annotation /// 6629 // lipid metabolism // inferred from sequence or structural similarity /// 16042 // lipid catabolism // inferred from electronic annotation /// 6629 // lipid metabolism // inferred from sequence similarity	---	IPR006693 // Ab-hydrolase associated lipase region // 2.1E-27
2503	143702_at	-1.36981	5.01002	-16.6385	3.82e-17	5.76e-15	29.0744	FBgn0013272	CG5820	Gp150	Gp150	37549	5524 // ATP binding // inferred from electronic annotation	7155 // cell adhesion // inferred from electronic annotation /// 7185 // transmembrane receptor protein tyrosine phosphatase signaling pathway // inferred from direct assay /// 7456 // eye development (sensu Endopterygota) // inferred from mutant phenotype /// 19226 // transmission of nerve impulse // inferred from electronic annotation	5886 // plasma membrane // inferred from direct assay	IPR001611 // Leucine-rich repeat // 4.3E-4 /// IPR001611 // Leucine-rich repeat // 0.0063 /// IPR001611 // Leucine-rich repeat // 6.1E-4 /// IPR001611 // Leucine-rich repeat // 0.0040 /// IPR001611 // Leucine-rich repeat // 0.0095 /// IPR001611 // Leucine-rich repeat // 0.16 /// IPR001611 // Leucine-rich repeat // 0.75 /// IPR001611 // Leucine-rich repeat // 0.55 /// IPR001611 // Leucine-rich rep…
5329	146528_at	-1.79971	1.56542	-16.4106	5.65e-17	8.22e-15	28.6815	FBgn0032839	CG10659	CG10659	CG10659	35285	---	---	---	---
8395	149594_at	-1.23614	2.50742	-16.2538	7.41e-17	1.05e-14	28.4087	FBgn0037764	CG9459	CG9459	CG9459	41213	8415 // acyltransferase activity // inferred from electronic annotation /// 16740 // transferase activity // inferred from electronic annotation	6629 // lipid metabolism // inferred from electronic annotation /// 6631 // fatty acid metabolism // inferred from electronic annotation	16021 // integral to membrane // inferred from electronic annotation	---
5359	146558_at	-1.31565	1.14103	-16.1644	8.65e-17	1.18e-14	28.2522	FBgn0032896	CG14400	CG14400	CG14400	35354	---	---	---	---
10871	152070_at	-1.15615	4.59833	-16.0869	9.91e-17	1.32e-14	28.1159	FBgn0030521	CG10992	CG10992	CG10992	32341	4213 // cathepsin B activity // inferred from sequence or structural similarity /// 5515 // protein binding // inferred from physical interaction /// 4197 // cysteine-type endopeptidase activity // inferred from electronic annotation /// 8233 // peptidase activity // inferred from electronic annotation /// 8234 // cysteine-type peptidase activity // inferred from electronic annotation /// 16787 /…	6508 // proteolysis // inferred from electronic annotation /// 35071 // salivary gland cell autophagic cell death // inferred from expression pattern /// 48102 // autophagic cell death // inferred from expression pattern	---	IPR000668 // Peptidase C1A, papain // 8.3E-114
9381	150580_at	-1.09057	0.870309	-15.9056	1.36e-16	1.75e-14	27.795	FBgn0051098	CG31098	CG31098	CG31098	43057	---	---	---	IPR004119 // Protein of unknown function DUF227 // 2.2E-103
10689	151888_at	-1.20166	2.44096	-15.7579	1.77e-16	2.25e-14	27.5313	FBgn0027930	CG1102	CG1102	CG1102	40541	3677 // DNA binding // inferred from electronic annotation /// 3700 // transcription factor activity // inferred from electronic annotation /// 4252 // serine-type endopeptidase activity // inferred from sequence or structural similarity /// 4263 // chymotrypsin activity // inferred from electronic annotation /// 4295 // trypsin activity // non-traceable author statement /// 8439 // monophenol mo…	6355 // regulation of transcription, DNA-dependent // inferred from electronic annotation /// 6508 // proteolysis // non-traceable author statement /// 6952 // defense response // non-traceable author statement /// 6508 // proteolysis // inferred from electronic annotation	5634 // nucleus // inferred from electronic annotation	IPR001254 // Peptidase S1, chymotrypsin // 4.4E-75
10230	151429_at	-1.59984	5.17025	-15.6574	2.12e-16	2.67e-14	27.3507	FBgn0040968	CG14933	CG14933	CG14933	50442	---	---	---	IPR002350 // Serine protease inhibitor, Kazal type // 8.8E-8
8569	149768_s_at	-1.44793	3.16182	-15.3872	3.44e-16	4.09e-14	26.8606	FBgn0038037	CG11466	Cyp9f2	Cyp9f2	41520	4497 // monooxygenase activity // inferred from electronic annotation /// 16491 // oxidoreductase activity // inferred from electronic annotation /// 5506 // iron ion binding // inferred from electronic annotation /// 20037 // heme binding // inferred from electronic annotation /// 46872 // metal ion binding // inferred from electronic annotation	6118 // electron transport // inferred from electronic annotation	5792 // microsome // non-traceable author statement /// 16020 // membrane // non-traceable author statement /// 5783 // endoplasmic reticulum // inferred from electronic annotation /// 5792 // microsome // inferred from electronic annotation /// 16020 // membrane // inferred from electronic annotation	IPR001128 // Cytochrome P450 // 1.5E-76 /// IPR001128 // Cytochrome P450 // 1.5E-79
266	141465_at	-1.4715	1.79992	-15.2407	4.49e-16	5.16e-14	26.592	FBgn0032785	CG10026	CG10026	CG10026	35226	5386 // carrier activity // inferred from electronic annotation /// 8431 // vitamin E binding // inferred from sequence or structural similarity /// 16918 // retinal binding // inferred from sequence or structural similarity /// 5215 // transporter activity // inferred from electronic annotation /// 8431 // vitamin E binding // inferred from sequence similarity /// 16918 // retinal binding // inf…	6732 // coenzyme metabolism // inferred from electronic annotation /// 6810 // transport // inferred from electronic annotation /// 51189 // prosthetic group metabolism // inferred from electronic annotation	5622 // intracellular // inferred from electronic annotation	IPR001251 // Cellular retinaldehyde-binding)/triple function, C-terminal // 5.9E-26 /// IPR001251 // Cellular retinaldehyde-binding)/triple function, C-terminal // 5.9E-26
2731	143930_at	-2.20838	3.06428	-15.2109	4.74e-16	5.4e-14	26.5372	FBgn0020509	CG1262	Acp62F	Accessory gland peptide 62F	38340	4867 // serine-type endopeptidase inhibitor activity // inferred from direct assay /// 4867 // serine-type endopeptidase inhibitor activity // inferred from sequence or structural similarity /// 30414 // protease inhibitor activity // traceable author statement /// 4867 // serine-type endopeptidase inhibitor activity // inferred from sequence similarity	7582 // physiological process // non-traceable author statement /// 8340 // determination of adult life span // non-traceable author statement /// 30162 // regulation of proteolysis // traceable author statement /// 45297 // post-mating behavior // non-traceable author statement /// 45861 // negative regulation of proteolysis // inferred from sequence or structural similarity /// 45861 // negativ…	---	IPR002919 // Trypsin inhibitor-like, cysteine-rich TIL region // 1.4E-20
1692	142891_at	-0.931111	0.823076	-15.199	4.85e-16	5.48e-14	26.5152	FBgn0031097	CG17052	CG17052	CG17052	33022	8061 // chitin binding // inferred from electronic annotation /// 16490 // structural constituent of peritrophic membrane (sensu Insecta) // inferred from sequence or structural similarity /// 16490 // structural constituent of peritrophic membrane (sensu Insecta) // inferred from sequence similarity	6030 // chitin metabolism // inferred from electronic annotation	5576 // extracellular region // inferred from electronic annotation	IPR002557 // Chitin binding Peritrophin-A // 7.6E-17 /// IPR002557 // Chitin binding Peritrophin-A // 4.0E-17 /// IPR002557 // Chitin binding Peritrophin-A // 2.7E-13
10011	151210_at	-1.77368	5.24295	-15.1052	5.76e-16	6.29e-14	26.3417	FBgn0040735	CG16836	CG16836	CG16836	50208	---	---	---	---
10864	152063_at	-1.61079	4.51227	-15.1099	5.71e-16	6.29e-14	26.3504	FBgn0033820	CG4716	CG4716	CG4716	36471	4486 // methylenetetrahydrofolate dehydrogenase activity // non-traceable author statement	---	---	---
13080	154279_at	-1.02294	3.72838	-15.102	5.79e-16	6.29e-14	26.3357	FBgn0028665	CG2934	VhaAC39	VhaAC39	31342	8553 // hydrogen-exporting ATPase activity, phosphorylative mechanism // inferred from sequence or structural similarity /// 8553 // hydrogen-exporting ATPase activity, phosphorylative mechanism // non-traceable author statement /// 46933 // hydrogen-transporting ATP synthase activity, rotational mechanism // inferred from electronic annotation /// 46961 // hydrogen-transporting ATPase activity, …	15986 // ATP synthesis coupled proton transport // inferred from electronic annotation /// 15992 // proton transport // non-traceable author statement /// 6754 // ATP biosynthesis // inferred from electronic annotation /// 6810 // transport // inferred from electronic annotation /// 6811 // ion transport // inferred from electronic annotation /// 15992 // proton transport // inferred from electro…	220 // hydrogen-transporting ATPase V0 domain // inferred from sequence or structural similarity /// 220 // hydrogen-transporting ATPase V0 domain // non-traceable author statement /// 16469 // proton-transporting two-sector ATPase complex // inferred from electronic annotation /// 220 // hydrogen-transporting ATPase V0 domain // inferred from sequence similarity	IPR002843 // H+-transporting two-sector ATPase, C (AC39) subunit // 1.0E-126
6211	147410_at	-2.13342	5.29291	-15.0912	5.91e-16	6.37e-14	26.3158	FBgn0034295	CG10911	CG10911	CG10911	37058	5515 // protein binding // inferred from physical interaction	---	---	IPR007931 // Protein of unknown function DUF725 // 3.7E-76
8982	150181_at	-1.39062	3.02	-14.954	7.61e-16	8.14e-14	26.0604	FBgn0038681	CG6042	Cyp12a4	Cyp12a4	42294	4497 // monooxygenase activity // inferred from electronic annotation /// 16491 // oxidoreductase activity // inferred from electronic annotation /// 5515 // protein binding // inferred from physical interaction /// 5506 // iron ion binding // inferred from electronic annotation /// 20037 // heme binding // inferred from electronic annotation /// 46872 // metal ion binding // inferred from electr…	6118 // electron transport // inferred from electronic annotation	5739 // mitochondrion // inferred from sequence or structural similarity /// 5739 // mitochondrion // non-traceable author statement /// 5739 // mitochondrion // inferred from electronic annotation /// 16020 // membrane // inferred from electronic annotation /// 5739 // mitochondrion // inferred from sequence similarity	IPR001128 // Cytochrome P450 // 5.4E-60 /// IPR001128 // Cytochrome P450 // 4.6E-61
11281	152480_at	-1.13914	3.22924	-14.9	8.41e-16	8.86e-14	25.9594	FBgn0022097	CG8186	Vha36	Vha36	44702	8553 // hydrogen-exporting ATPase activity, phosphorylative mechanism // inferred from sequence or structural similarity /// 8553 // hydrogen-exporting ATPase activity, phosphorylative mechanism // non-traceable author statement /// 46933 // hydrogen-transporting ATP synthase activity, rotational mechanism // inferred from electronic annotation /// 46961 // hydrogen-transporting ATPase activity, …	6144 // purine base metabolism // inferred from electronic annotation /// 15986 // ATP synthesis coupled proton transport // inferred from electronic annotation /// 15992 // proton transport // inferred from sequence or structural similarity /// 6754 // ATP biosynthesis // inferred from electronic annotation /// 6810 // transport // inferred from electronic annotation /// 6811 // ion transport //…	221 // hydrogen-transporting ATPase V1 domain // inferred from sequence or structural similarity /// 221 // hydrogen-transporting ATPase V1 domain // non-traceable author statement /// 16469 // proton-transporting two-sector ATPase complex // inferred from electronic annotation /// 221 // hydrogen-transporting ATPase V1 domain // inferred from sequence similarity	IPR002699 // H+-transporting two-sector ATPase, D subunit // 9.9E-89
2415	143614_at	-1.63525	2.74519	-14.8789	8.75e-16	9.15e-14	25.9197	FBgn0010403	CG11422	Os-E	Olfactory-specific E	40738	5102 // receptor binding // inferred from electronic annotation /// 5550 // pheromone binding // non-traceable author statement /// 5549 // odorant binding // inferred from electronic annotation /// 5550 // pheromone binding // inferred from electronic annotation	6810 // transport // inferred from electronic annotation /// 7165 // signal transduction // inferred from electronic annotation /// 19236 // response to pheromone // inferred from electronic annotation	5576 // extracellular region // non-traceable author statement	IPR006170 // Pheromone/general odorant binding protein, PBP/GOBP // 1.3E-32 /// IPR006170 // Pheromone/general odorant binding protein, PBP/GOBP // 1.8E-24
12587	153786_at	-1.11414	4.02288	-14.8326	9.54e-16	9.9e-14	25.8329	FBgn0036433	CG9628	CG9628	CG9628	39593	5515 // protein binding // inferred from physical interaction	---	---	---
10882	152081_at	-0.980584	2.07458	-14.7118	1.2e-15	1.2e-13	25.6049	FBgn0036760	CG5567	CG5567	CG5567	39986	3869 // 4-nitrophenylphosphatase activity // inferred from sequence or structural similarity /// 3869 // 4-nitrophenylphosphatase activity // inferred from sequence similarity	8152 // metabolism // inferred from electronic annotation	---	IPR005834 // Haloacid dehalogenase-like hydrolase // 2.7E-17
6038	147237_at	-1.72616	3.11039	-14.6763	1.28e-15	1.27e-13	25.5377	FBgn0001187	CG8094	Hex-C	Hexokinase C	44008	4396 // hexokinase activity // inferred from direct assay /// 4396 // hexokinase activity // inferred from sequence or structural similarity /// 4396 // hexokinase activity // non-traceable author statement /// 5524 // ATP binding // inferred from electronic annotation /// 166 // nucleotide binding // inferred from electronic annotation /// 4396 // hexokinase activity // inferred from electronic …	6096 // glycolysis // inferred from electronic annotation	---	IPR001312 // Hexokinase // 1.2E-100 /// IPR001312 // Hexokinase // 2.6E-89
5187	146386_at	-1.11775	1.60306	-14.5346	1.67e-15	1.63e-13	25.2681	FBgn0032614	CG13284	CG13284	CG13284	35021	16229 // steroid dehydrogenase activity // inferred from sequence or structural similarity /// 16491 // oxidoreductase activity // inferred from electronic annotation /// 16229 // steroid dehydrogenase activity // inferred from sequence similarity	8202 // steroid metabolism // inferred from electronic annotation /// 8152 // metabolism // inferred from electronic annotation	---	IPR002198 // Short-chain dehydrogenase/reductase SDR // 1.1E-41 /// IPR002198 // Short-chain dehydrogenase/reductase SDR // 1.1E-41
7440	148639_at	-1.34276	4.5425	-14.497	1.79e-15	1.72e-13	25.1962	FBgn0036262	CG6910	CG6910	CG6910	39391	16491 // oxidoreductase activity // inferred from electronic annotation	5975 // carbohydrate metabolism // inferred from electronic annotation /// 6139 // nucleobase, nucleoside, nucleotide and nucleic acid metabolism // inferred from electronic annotation	---	IPR007828 // Protein of unknown function DUF706 // 1.0E-126
8656	149855_at	-1.15187	1.74254	-14.4556	1.94e-15	1.85e-13	25.1168	FBgn0038172	CG9621	Adgf-D	Adenosine deaminase-related growth factor D	41679	4000 // adenosine deaminase activity // inferred from direct assay /// 8083 // growth factor activity // inferred from direct assay /// 19239 // deaminase activity // inferred from electronic annotation	8283 // cell proliferation // inferred from direct assay /// 9168 // purine ribonucleoside monophosphate biosynthesis // inferred from electronic annotation	5615 // extracellular space // non-traceable author statement	IPR001365 // Adenosine/AMP deaminase // 1.3E-47
11353	152552_at	-0.980852	3.31811	-14.3875	2.21e-15	2.07e-13	24.986	FBgn0053970	---	CG33970	CG33970	43186	166 // nucleotide binding // inferred from electronic annotation /// 5215 // transporter activity // inferred from sequence or structural similarity /// 5524 // ATP binding // inferred from electronic annotation /// 42626 // ATPase activity, coupled to transmembrane movement of substances // inferred from sequence or structural similarity /// 16887 // ATPase activity // inferred from electronic a…	6810 // transport // inferred from sequence or structural similarity /// 6810 // transport // inferred from electronic annotation /// 6810 // transport // inferred from sequence similarity	16020 // membrane // inferred from electronic annotation /// 43190 // ATP-binding cassette (ABC) transporter complex // inferred from sequence or structural similarity /// 43190 // ATP-binding cassette (ABC) transporter complex // inferred from sequence similarity	---
9512	150711_at	-1.17203	1.46019	-14.3657	2.3e-15	2.13e-13	24.9439	FBgn0039485	CG17189	CG17189	CG17189	43263	---	---	---	IPR004272 // Odorant binding protein // 3.8E-59
8672	149871_at	-1.04782	2.79182	-14.2638	2.8e-15	2.56e-13	24.7469	FBgn0038198	CG3153	CG3153	CG3153	41710	5102 // receptor binding // inferred from electronic annotation	---	---	IPR003172 // E1 protein and Def2/Der2 allergen // 3.7E-43
9965	151164_at	-1.44217	6.52134	-14.2555	2.84e-15	2.58e-13	24.7309	FBgn0040687	CG14645	CG14645	CG14645	50160	---	---	---	---
6904	148103_at	-3.54522	3.59024	-14.2242	3.02e-15	2.73e-13	24.6701	FBgn0035434	CG10812	dro5	drosomycin-5	38409	8200 // ion channel inhibitor activity // inferred from electronic annotation	6952 // defense response // non-traceable author statement /// 9405 // pathogenesis // inferred from electronic annotation /// 6952 // defense response // inferred from electronic annotation	5576 // extracellular region // inferred from electronic annotation	IPR008176 // Gamma thionin // 5.4E-18
1940	143139_at	-1.11765	3.15195	-14.1543	3.45e-15	3.08e-13	24.5342	FBgn0000536	CG3525	eas	easily shocked	32585	4103 // choline kinase activity // non-traceable author statement /// 4103 // choline kinase activity // traceable author statement /// 4305 // ethanolamine kinase activity // inferred from direct assay /// 4305 // ethanolamine kinase activity // non-traceable author statement /// 5515 // protein binding // inferred from physical interaction /// 4305 // ethanolamine kinase activity // inferred fr…	6646 // phosphatidylethanolamine biosynthesis // non-traceable author statement /// 7420 // brain development // inferred from mutant phenotype /// 7616 // long-term memory // traceable author statement /// 7638 // mechanosensory behavior // inferred from mutant phenotype /// 8306 // associative learning // traceable author statement /// 9612 // response to mechanical stimulus // inferred from mu…	---	IPR002573 // Choline/ethanolamine kinase // 1.0E-126 /// IPR002573 // Choline/ethanolamine kinase // 1.0E-126 /// IPR002573 // Choline/ethanolamine kinase // 1.0E-126
9124	150323_at	-0.856674	0.053368	-13.9556	5.07e-15	4.49e-13	24.1449	FBgn0038900	CG13420	CG13420	CG13420	42559	---	---	---	---
5761	146960_at	-1.24823	2.1015	-13.9169	5.47e-15	4.79e-13	24.0686	FBgn0033543	CG12338	CG12338	CG12338	36128	3884 // D-amino-acid oxidase activity // inferred from electronic annotation /// 8445 // D-aspartate oxidase activity // inferred from sequence or structural similarity /// 16491 // oxidoreductase activity // inferred from electronic annotation /// 8445 // D-aspartate oxidase activity // inferred from sequence similarity	6118 // electron transport // inferred from electronic annotation /// 6520 // amino acid metabolism // inferred from electronic annotation	---	IPR006076 // FAD dependent oxidoreductase // 7.4E-45
11579	152778_at	-2.03513	2.57086	-13.9131	5.51e-15	4.79e-13	24.061	FBgn0039872	CG2196	CG2196	CG2196	43742	8324 // cation transporter activity // inferred from electronic annotation /// 8507 // sodium:iodide symporter activity // inferred from sequence or structural similarity /// 5215 // transporter activity // inferred from electronic annotation /// 8507 // sodium:iodide symporter activity // inferred from sequence similarity	6732 // coenzyme metabolism // inferred from electronic annotation /// 6812 // cation transport // inferred from electronic annotation /// 6858 // extracellular transport // inferred from electronic annotation /// 51189 // prosthetic group metabolism // inferred from electronic annotation /// 6810 // transport // inferred from electronic annotation	16020 // membrane // inferred from electronic annotation	---
13742	154941_at	-1.10017	1.9251	-13.9092	5.55e-15	4.79e-13	24.0533	FBgn0032876	CG1962	CG1962	CG1962	35330	---	---	---	---
1238	142437_at	-1.14432	0.690916	-13.8987	5.67e-15	4.84e-13	24.0325	FBgn0011283	CG6641	Pbprp5	Pheromone-binding protein-related protein 5	34031	5550 // pheromone binding // inferred from sequence or structural similarity /// 5550 // pheromone binding // non-traceable author statement /// 8145 // phenylalkylamine binding // non-traceable author statement /// 16491 // oxidoreductase activity // inferred from electronic annotation /// 5549 // odorant binding // inferred from electronic annotation /// 5550 // pheromone binding // inferred fr…	6810 // transport // inferred from electronic annotation /// 8152 // metabolism // inferred from electronic annotation	5576 // extracellular region // non-traceable author statement	IPR006170 // Pheromone/general odorant binding protein, PBP/GOBP // 9.0E-28
11028	152227_at	-1.28501	2.77106	-13.6864	8.61e-15	7.26e-13	23.6106	FBgn0038407	CG6126	CG6126	CG6126	41967	15101 // organic cation transporter activity // inferred from sequence or structural similarity /// 15144 // carbohydrate transporter activity // inferred from electronic annotation /// 5515 // protein binding // inferred from physical interaction /// 5215 // transporter activity // inferred from electronic annotation /// 15101 // organic cation transporter activity // inferred from sequence simi…	5975 // carbohydrate metabolism // inferred from electronic annotation /// 6812 // cation transport // inferred from electronic annotation /// 6858 // extracellular transport // inferred from electronic annotation /// 8643 // carbohydrate transport // inferred from electronic annotation /// 6810 // transport // inferred from electronic annotation	16020 // membrane // inferred from electronic annotation /// 16021 // integral to membrane // inferred from electronic annotation	IPR005828 // General substrate transporter // 1.0E-15
1187	142386_at	-1.7762	2.17478	-13.6444	9.35e-15	7.85e-13	23.5266	FBgn0034247	CG6484	CG6484	CG6484	36994	5351 // sugar porter activity // inferred from electronic annotation /// 5355 // glucose transporter activity // inferred from sequence or structural similarity /// 5215 // transporter activity // inferred from electronic annotation /// 5355 // glucose transporter activity // inferred from sequence similarity	5975 // carbohydrate metabolism // inferred from electronic annotation /// 8643 // carbohydrate transport // inferred from electronic annotation /// 6810 // transport // inferred from electronic annotation	16020 // membrane // inferred from electronic annotation /// 16021 // integral to membrane // inferred from electronic annotation	IPR005828 // General substrate transporter // 1.8E-106
6973	148172_at	-0.997565	1.46534	-13.6393	9.45e-15	7.88e-13	23.5163	FBgn0053514	CG33514	CG33514	CG33514	3346239	8431 // vitamin E binding // inferred from sequence or structural similarity /// 5215 // transporter activity // inferred from electronic annotation /// 8431 // vitamin E binding // inferred from sequence similarity	6810 // transport // inferred from electronic annotation	5622 // intracellular // inferred from electronic annotation	IPR001251 // Cellular retinaldehyde-binding)/triple function, C-terminal // 6.9E-23
11172	152371_at	-0.846488	2.09688	-13.6005	1.02e-14	8.46e-13	23.4385	FBgn0039081 /// FBgn0068135	CG4370	Irk2 /// DyakIrk2	Inwardly rectifying potassium channel 2 /// Irk2	42770	5242 // inward rectifier potassium channel activity // non-traceable author statement /// 15467 // G-protein activated inward rectifier potassium channel activity // inferred from sequence or structural similarity /// 5216 // ion channel activity // inferred from electronic annotation /// 5242 // inward rectifier potassium channel activity // inferred from electronic annotation /// 5244 // voltag…	6812 // cation transport // inferred from electronic annotation /// 6813 // potassium ion transport // inferred from electronic annotation /// 6810 // transport // inferred from electronic annotation /// 6811 // ion transport // inferred from electronic annotation	16020 // membrane // inferred from electronic annotation /// 16021 // integral to membrane // inferred from electronic annotation	IPR001838 // K+ channel, inward rectifier // 1.0E-126 /// IPR001838 // K+ channel, inward rectifier // 1.0E-126
10982	152181_at	-0.895791	1.11941	-13.5942	1.03e-14	8.52e-13	23.4258	FBgn0027563	CG9631	CG9631	CG9631	41729	4252 // serine-type endopeptidase activity // inferred from sequence or structural similarity /// 4263 // chymotrypsin activity // inferred from electronic annotation /// 4295 // trypsin activity // inferred from electronic annotation /// 42708 // elastase activity // non-traceable author statement /// 5515 // protein binding // inferred from physical interaction /// 4252 // serine-type endopepti…	6508 // proteolysis // non-traceable author statement /// 6952 // defense response // inferred from electronic annotation /// 6508 // proteolysis // inferred from electronic annotation	---	IPR001254 // Peptidase S1, chymotrypsin // 5.4E-37
448	141647_at	-1.39154	3.49628	-13.4147	1.48e-14	1.16e-12	23.0635	FBgn0035436	CG12016	CG12016	CG12016	38411	5515 // protein binding // inferred from physical interaction	---	---	---
13806	155005_at	-0.793962	1.68956	-13.3949	1.54e-14	1.2e-12	23.0233	FBgn0030269	CG18292	CG18292	CG18292	32050	19207 // kinase regulator activity // inferred from electronic annotation /// 19210 // kinase inhibitor activity // inferred from electronic annotation	8283 // cell proliferation // inferred from electronic annotation	---	---
10914	152113_at	-0.973305	2.45276	-13.2683	1.99e-14	1.52e-12	22.7654	FBgn0011746	CG8084	ana	anachronism	35913	---	7406 // negative regulation of neuroblast proliferation // non-traceable author statement	5576 // extracellular region // non-traceable author statement	---
11800	152999_at	-1.36888	1.87521	-13.1938	2.31e-14	1.75e-12	22.6127	FBgn0031305	CG4715	Iris	Iris	33290	---	9993 // oogenesis (sensu Insecta) // non-traceable author statement	---	---
11620	152819_at	-1.36003	1.31197	-13.137	2.59e-14	1.94e-12	22.4958	FBgn0038733	CG11407	CG11407	CG11407	42354	5324 // long-chain fatty acid transporter activity // inferred from sequence or structural similarity /// 16874 // ligase activity // inferred from electronic annotation /// 5515 // protein binding // inferred from physical interaction /// 3824 // catalytic activity // inferred from electronic annotation /// 5324 // long-chain fatty acid transporter activity // inferred from sequence similarity	8152 // metabolism // inferred from electronic annotation	---	IPR000873 // AMP-dependent synthetase and ligase // 9.1E-88
13622	154821_at	-2.09981	0.229926	-13.0718	2.96e-14	2.21e-12	22.3614	FBgn0043791	CG8147	CG8147	CG8147	41135	4035 // alkaline phosphatase activity // inferred from sequence or structural similarity /// 19204 // nucleotide phosphatase activity // inferred from electronic annotation /// 287 // magnesium ion binding // inferred from electronic annotation /// 8270 // zinc ion binding // inferred from electronic annotation /// 16787 // hydrolase activity // inferred from electronic annotation /// 4035 // alk…	1501 // skeletal development // inferred from electronic annotation /// 7498 // mesoderm development // inferred from electronic annotation /// 8152 // metabolism // inferred from electronic annotation	---	IPR001952 // Alkaline phosphatase // 1.6E-99
11233	152432_at	-0.853732	0.506992	-13.0592	3.04e-14	2.25e-12	22.3353	FBgn0028480	CG17841	CG17841	CG17841	31965	5515 // protein binding // inferred from physical interaction	---	16021 // integral to membrane // inferred from electronic annotation	IPR010283 // Eukaryotic protein of unknown function DUF887 // 3.0E-5
8396	149595_at	-1.13164	2.71067	-13.0444	3.13e-14	2.3e-12	22.3048	FBgn0037765	CG9458	CG9458	CG9458	41214	8415 // acyltransferase activity // inferred from electronic annotation /// 16740 // transferase activity // inferred from electronic annotation /// 5515 // protein binding // inferred from physical interaction	6629 // lipid metabolism // inferred from electronic annotation /// 6631 // fatty acid metabolism // inferred from electronic annotation	16021 // integral to membrane // inferred from electronic annotation	---
11017	152216_at	-1.01169	2.70397	-13.0115	3.35e-14	2.44e-12	22.2366	FBgn0037386	CG1208	CG1208	CG1208	40727	5351 // sugar porter activity // inferred from electronic annotation /// 5355 // glucose transporter activity // inferred from sequence or structural similarity /// 5215 // transporter activity // inferred from electronic annotation /// 5355 // glucose transporter activity // inferred from sequence similarity	5975 // carbohydrate metabolism // inferred from electronic annotation /// 8643 // carbohydrate transport // inferred from electronic annotation /// 6810 // transport // inferred from electronic annotation	16020 // membrane // inferred from electronic annotation /// 16021 // integral to membrane // inferred from electronic annotation	IPR005828 // General substrate transporter // 7.9E-78
12199	153398_at	-1.06734	2.02155	-12.9505	3.8e-14	2.74e-12	22.11	FBgn0037228	CG1092	CG1092	CG1092	40538	5515 // protein binding // inferred from physical interaction	---	---	---
5920	147119_at	-0.853807	1.29242	-12.9235	4.01e-14	2.87e-12	22.0536	FBgn0033775	CG17577	Cyp9h1	Cyp9h1	36412	4497 // monooxygenase activity // inferred from electronic annotation /// 16491 // oxidoreductase activity // inferred from electronic annotation /// 5506 // iron ion binding // inferred from electronic annotation /// 20037 // heme binding // inferred from electronic annotation /// 46872 // metal ion binding // inferred from electronic annotation	6118 // electron transport // inferred from electronic annotation	5792 // microsome // non-traceable author statement /// 16020 // membrane // non-traceable author statement /// 16020 // membrane // inferred from electronic annotation	IPR001128 // Cytochrome P450 // 5.5E-80 /// IPR001128 // Cytochrome P450 // 1.1E-56
13188	154387_at	-0.774612	3.06677	-12.9248	4e-14	2.87e-12	22.0565	FBgn0027086	CG11471	Aats-ile	Isoleucyl-tRNA synthetase	45785	3729 // mRNA binding // inferred from electronic annotation /// 4822 // isoleucine-tRNA ligase activity // inferred from sequence or structural similarity /// 5524 // ATP binding // inferred from electronic annotation /// 4812 // aminoacyl-tRNA ligase activity // inferred from electronic annotation /// 4822 // isoleucine-tRNA ligase activity // inferred from electronic annotation /// 4822 // isol…	6428 // isoleucyl-tRNA aminoacylation // inferred from sequence or structural similarity /// 6418 // tRNA aminoacylation for protein translation // inferred from electronic annotation /// 6428 // isoleucyl-tRNA aminoacylation // inferred from electronic annotation /// 6428 // isoleucyl-tRNA aminoacylation // inferred from sequence similarity	---	IPR002300 // Aminoacyl-tRNA synthetase, class Ia // 1.0E-126
11667	152866_at	-1.80743	3.85691	-12.8306	4.86e-14	3.42e-12	21.8597	FBgn0031689	CG10833	Cyp28d1	Cyp28d1	33749	4497 // monooxygenase activity // inferred from electronic annotation /// 16491 // oxidoreductase activity // inferred from electronic annotation /// 5515 // protein binding // inferred from physical interaction /// 5506 // iron ion binding // inferred from electronic annotation /// 20037 // heme binding // inferred from electronic annotation /// 46872 // metal ion binding // inferred from electr…	6118 // electron transport // inferred from electronic annotation /// 8202 // steroid metabolism // inferred from electronic annotation	5792 // microsome // non-traceable author statement /// 16020 // membrane // non-traceable author statement /// 5783 // endoplasmic reticulum // inferred from electronic annotation /// 5792 // microsome // inferred from electronic annotation /// 16020 // membrane // inferred from electronic annotation	IPR001128 // Cytochrome P450 // 4.4E-74
10009	151208_at	-1.90188	7.00585	-12.7672	5.54e-14	3.85e-12	21.7267	FBgn0040733	CG15068	CG15068	CG15068	50206	---	---	---	---
6154	147353_at	-1.44422	3.19826	-12.753	5.71e-14	3.92e-12	21.6969	FBgn0034198	CG11400	CG11400	CG11400	36935	---	---	---	---
4789	145988_at	-1.72451	2.96337	-12.7259	6.04e-14	4.11e-12	21.6397	FBgn0040099	CG7106	lectin-28C	lectin-28C	53542	5534 // galactose binding // inferred from sequence or structural similarity /// 5515 // protein binding // inferred from physical interaction /// 1584 // rhodopsin-like receptor activity // inferred from electronic annotation /// 4871 // signal transducer activity // inferred from electronic annotation /// 4872 // receptor activity // inferred from electronic annotation /// 4930 // G-protein cou…	7283 // spermatogenesis // inferred from electronic annotation /// 8594 // photoreceptor cell morphogenesis (sensu Endopterygota) // inferred from mutant phenotype /// 42052 // rhabdomere development // inferred from mutant phenotype /// 7165 // signal transduction // inferred from electronic annotation /// 7186 // G-protein coupled receptor protein signaling pathway // inferred from electronic a…	16027 // inaD signaling complex // inferred from physical interaction /// 5767 // secondary lysosome // inferred from direct assay /// 5771 // multivesicular body // inferred from direct assay /// 5791 // rough endoplasmic reticulum // inferred from direct assay /// 16023 // cytoplasmic membrane-bound vesicle // inferred from direct assay /// 16028 // rhabdomere // inferred from direct assay /// …	IPR001304 // C-type lectin // 4.8E-14 /// IPR001304 // C-type lectin // 4.8E-14
550	141749_at	-2.28173	4.09016	-12.7141	6.19e-14	4.19e-12	21.6149	FBgn0013576	CG32464	l(3)82Fd	l(3)82Fd	45467	5515 // protein binding // inferred from physical interaction	16998 // cell wall catabolism // inferred from electronic annotation	---	IPR002482 // Peptidoglycan-binding LysM // 1.0E-15 /// IPR002482 // Peptidoglycan-binding LysM // 1.0E-15
13119	154318_at	-1.03652	1.92783	-12.7025	6.34e-14	4.22e-12	21.5904	FBgn0033304	CG2397	Cyp6a13	Cyp6a13	35837	4497 // monooxygenase activity // inferred from electronic annotation /// 16491 // oxidoreductase activity // inferred from electronic annotation /// 5515 // protein binding // inferred from physical interaction /// 5506 // iron ion binding // inferred from electronic annotation /// 20037 // heme binding // inferred from electronic annotation /// 46872 // metal ion binding // inferred from electr…	6118 // electron transport // inferred from electronic annotation /// 8202 // steroid metabolism // inferred from electronic annotation	5792 // microsome // non-traceable author statement /// 16020 // membrane // non-traceable author statement /// 5783 // endoplasmic reticulum // inferred from electronic annotation /// 5792 // microsome // inferred from electronic annotation /// 16020 // membrane // inferred from electronic annotation	IPR001128 // Cytochrome P450 // 1.5E-109
11493	152692_at	-1.43391	3.81582	-12.6914	6.49e-14	4.29e-12	21.567	FBgn0027621	CG3400	Pfrx	6-phosphofructo-2-kinase	32938	3873 // 6-phosphofructo-2-kinase activity // inferred from sequence or structural similarity /// 3873 // 6-phosphofructo-2-kinase activity // non-traceable author statement /// 4331 // fructose-2,6-bisphosphate 2-phosphatase activity // inferred from sequence or structural similarity /// 4331 // fructose-2,6-bisphosphate 2-phosphatase activity // non-traceable author statement /// 5524 // ATP bin…	6000 // fructose metabolism // inferred from sequence or structural similarity /// 6003 // fructose 2,6-bisphosphate metabolism // inferred from electronic annotation /// 6096 // glycolysis // inferred from electronic annotation /// 8152 // metabolism // inferred from electronic annotation /// 6000 // fructose metabolism // inferred from sequence similarity	---	IPR003094 // Fructose-2,6-bisphosphatase // 5.8E-114 /// IPR001345 // Phosphoglycerate/bisphosphoglycerate mutase // 2.9E-89 /// IPR003094 // Fructose-2,6-bisphosphatase // 5.8E-114 /// IPR001345 // Phosphoglycerate/bisphosphoglycerate mutase // 2.9E-89
9689	150888_at	-1.10195	0.900561	-12.689	6.52e-14	4.29e-12	21.562	FBgn0039769	CG15534	CG15534	CG15534	43613	4767 // sphingomyelin phosphodiesterase activity // inferred from sequence or structural similarity /// 4767 // sphingomyelin phosphodiesterase activity // inferred from electronic annotation /// 16787 // hydrolase activity // inferred from electronic annotation /// 4767 // sphingomyelin phosphodiesterase activity // inferred from sequence similarity	6684 // sphingomyelin metabolism // inferred from sequence or structural similarity /// 6685 // sphingomyelin catabolism // inferred from electronic annotation /// 6684 // sphingomyelin metabolism // inferred from sequence similarity	---	IPR004843 // Metallo-phosphoesterase // 3.9E-16
296	141495_at	-1.13898	3.85926	-12.6428	7.18e-14	4.68e-12	21.4644	FBgn0004687	CG3201	Mlc-c	Myosin light chain cytoplasmic	31474	5200 // structural constituent of cytoskeleton // inferred from electronic annotation /// 5509 // calcium ion binding // inferred from electronic annotation /// 8092 // cytoskeletal protein binding // inferred from electronic annotation /// 42623 // ATPase activity, coupled // inferred from sequence or structural similarity /// 5515 // protein binding // inferred from physical interaction /// 377…	6936 // muscle contraction // inferred from electronic annotation	16459 // myosin // inferred from sequence or structural similarity /// 16461 // unconventional myosin // non-traceable author statement /// 16459 // myosin // inferred from electronic annotation /// 16459 // myosin // inferred from sequence similarity	IPR002048 // Calcium-binding EF-hand // 1.2E-4 /// IPR002048 // Calcium-binding EF-hand // 2.0E-5 /// IPR002048 // Calcium-binding EF-hand // 0.29
7751	148950_at	-0.959466	2.27309	-12.6315	7.36e-14	4.77e-12	21.4403	FBgn0042641	CG3874	frc	fringe connection	39943	5457 // GDP-fucose transporter activity // inferred from direct assay /// 5458 // GDP-mannose transporter activity // inferred from direct assay /// 5459 // UDP-galactose transporter activity // inferred from direct assay /// 5460 // UDP-glucose transporter activity // inferred from direct assay /// 5461 // UDP-glucuronic acid transporter activity // inferred from direct assay /// 5462 // UDP-N-a…	1745 // compound eye morphogenesis (sensu Endopterygota) // inferred from mutant phenotype /// 5975 // carbohydrate metabolism // inferred from electronic annotation /// 7220 // Notch receptor processing // non-traceable author statement /// 7423 // sensory organ development // inferred from mutant phenotype /// 7447 // imaginal disc pattern formation // inferred from mutant phenotype /// 7476 //…	5794 // Golgi apparatus // non-traceable author statement /// 5795 // Golgi stack // inferred from electronic annotation /// 16020 // membrane // inferred from electronic annotation /// 16021 // integral to membrane // inferred from electronic annotation	---
5226	146425_at	-0.917457	1.95242	-12.6106	7.69e-14	4.94e-12	21.3961	FBgn0032665	CG15152	CG15152	CG15152	35082	---	---	---	---
7066	148265_at	-1.1098	1.70224	-12.6106	7.69e-14	4.94e-12	21.396	FBgn0035679	CG10467	CG10467	CG10467	38697	4034 // aldose 1-epimerase activity // inferred from sequence or structural similarity /// 4034 // aldose 1-epimerase activity // inferred from electronic annotation /// 4034 // aldose 1-epimerase activity // inferred from sequence similarity	5996 // monosaccharide metabolism // inferred from electronic annotation /// 6012 // galactose metabolism // inferred from electronic annotation	---	IPR008183 // Aldose 1-epimerase // 1.0E-126
10397	151596_s_at	-1.08133	1.52838	-12.5439	8.84e-14	5.66e-12	21.2545	FBgn0052054	CG32054	CG32054	CG32054	326185	5215 // transporter activity // inferred from electronic annotation /// 15144 // carbohydrate transporter activity // inferred from electronic annotation	5975 // carbohydrate metabolism // inferred from electronic annotation /// 6810 // transport // inferred from electronic annotation /// 8643 // carbohydrate transport // inferred from electronic annotation	16020 // membrane // inferred from electronic annotation /// 16021 // integral to membrane // inferred from electronic annotation	IPR005828 // General substrate transporter // 3.2E-7
2043	143242_at	-2.51784	5.08194	-12.5295	9.11e-14	5.8e-12	21.2238	FBgn0002570	CG8696	LvpH	Larval visceral protein H	35824	4556 // alpha-amylase activity // inferred from electronic annotation /// 4558 // alpha-glucosidase activity // inferred from sequence or structural similarity /// 4558 // alpha-glucosidase activity // non-traceable author statement /// 5515 // protein binding // inferred from physical interaction /// 4558 // alpha-glucosidase activity // inferred from electronic annotation /// 16787 // hydrolase…	6006 // glucose metabolism // non-traceable author statement /// 5975 // carbohydrate metabolism // inferred from electronic annotation	---	IPR006047 // Alpha amylase, catalytic domain // 1.0E-126
3502	144701_at	-1.246	3.35101	-12.5032	9.63e-14	6.05e-12	21.1678	FBgn0030041	CG12116	CG12116	CG12116	31782	4757 // sepiapterin reductase activity // inferred from sequence or structural similarity /// 5515 // protein binding // inferred from physical interaction /// 16491 // oxidoreductase activity // inferred from electronic annotation /// 4757 // sepiapterin reductase activity // inferred from sequence similarity	8152 // metabolism // inferred from electronic annotation	---	---
11734	152933_at	-1.56898	2.84731	-12.5029	9.64e-14	6.05e-12	21.1672	FBgn0037090	CG7529	CG7529	CG7529	40381	4091 // carboxylesterase activity // inferred from sequence or structural similarity /// 3824 // catalytic activity // inferred from electronic annotation /// 4759 // serine esterase activity // inferred from electronic annotation /// 4091 // carboxylesterase activity // inferred from sequence similarity	---	---	IPR002018 // Carboxylesterase, type B // 1.0E-126
12216	153415_at	-0.800557	1.50124	-12.4391	1.1e-13	6.9e-12	21.031	FBgn0040102	CG2958	lectin-24Db	lectin-24Db	53550	5534 // galactose binding // inferred from sequence or structural similarity /// 5537 // mannose binding // inferred from direct assay /// 42806 // fucose binding // inferred from direct assay /// 5529 // sugar binding // inferred from electronic annotation /// 5534 // galactose binding // inferred from sequence similarity	7283 // spermatogenesis // inferred from electronic annotation	---	IPR001304 // C-type lectin // 1.8E-26
6233	147432_at	-2.38966	3.7425	-12.4249	1.14e-13	7.04e-12	21.0006	FBgn0034330	CG18107	CG18107	CG18107	37101	---	---	---	---
10554	151753_r_at	-0.738554	2.80129	-12.4269	1.13e-13	7.04e-12	21.0049	FBgn0053123	CG33123	CG33123	CG33123	326262	3729 // mRNA binding // inferred from electronic annotation /// 4601 // peroxidase activity // inferred from electronic annotation /// 4823 // leucine-tRNA ligase activity // inferred from sequence or structural similarity /// 5524 // ATP binding // inferred from electronic annotation /// 4812 // aminoacyl-tRNA ligase activity // inferred from electronic annotation /// 4823 // leucine-tRNA ligase…	6418 // tRNA aminoacylation for protein translation // inferred from electronic annotation /// 6979 // response to oxidative stress // inferred from electronic annotation /// 6412 // protein biosynthesis // inferred from electronic annotation	5737 // cytoplasm // inferred from electronic annotation	---
11295	152494_at	-3.00569	3.67771	-12.3854	1.24e-13	7.59e-12	20.9159	FBgn0033065	CG8345	Cyp6w1	Cyp6w1	35543	4497 // monooxygenase activity // inferred from electronic annotation /// 16491 // oxidoreductase activity // inferred from electronic annotation /// 5506 // iron ion binding // inferred from electronic annotation /// 20037 // heme binding // inferred from electronic annotation /// 46872 // metal ion binding // inferred from electronic annotation	6118 // electron transport // inferred from electronic annotation	5792 // microsome // non-traceable author statement /// 16020 // membrane // non-traceable author statement /// 5783 // endoplasmic reticulum // inferred from electronic annotation /// 5792 // microsome // inferred from electronic annotation /// 16020 // membrane // inferred from electronic annotation	IPR001128 // Cytochrome P450 // 1.7E-89
12166	153365_at	-1.22312	2.84886	-12.3669	1.28e-13	7.86e-12	20.8762	FBgn0032773	CG15825	CG15825	CG15825	35211	---	---	---	---
7349	148548_at	-0.868923	2.92347	-12.2341	1.7e-13	1.02e-11	20.5899	FBgn0010741	CG6302	l(3)01239	lethal (3) 01239	46121	51087 // chaperone binding // inferred from sequence or structural similarity /// 51087 // chaperone binding // inferred from sequence similarity	6458 // 'de novo' protein folding // inferred from sequence or structural similarity /// 9993 // oogenesis (sensu Insecta) // inferred from mutant phenotype /// 6458 // 'de novo' protein folding // inferred from sequence similarity	16272 // prefoldin complex // inferred from sequence or structural similarity /// 16272 // prefoldin complex // inferred from sequence similarity	IPR002777 // Prefoldin-related KE2 protein // 1.8E-20
13446	154645_at	-0.822161	0.629762	-12.1733	1.94e-13	1.15e-11	20.4581	FBgn0039350	CG17383	CG17383	CG17383	43093	5515 // protein binding // inferred from physical interaction /// 42802 // identical protein binding // inferred from physical interaction	---	---	---
7496	148695_at	-1.36803	1.89169	-12.142	2.08e-13	1.23e-11	20.39	FBgn0036342	CG11279	CG11279	CG11279	39486	---	---	---	---
11022	152221_at	-1.00336	1.65894	-12.1017	2.26e-13	1.32e-11	20.3024	FBgn0038292	CG3987	CG3987	CG3987	41822	---	7498 // mesoderm development // inferred from expression pattern	---	---
11958	153157_at	-1.13165	1.63906	-12.0925	2.31e-13	1.34e-11	20.2823	FBgn0037213	CG12581	CG12581	CG12581	40522	---	---	---	---
5050	146249_at	-1.19982	1.22447	-12.0681	2.43e-13	1.4e-11	20.229	FBgn0032373	CG12602	CG12602	CG12602	34587	5507 // copper ion binding // inferred from electronic annotation /// 8553 // hydrogen-exporting ATPase activity, phosphorylative mechanism // inferred from sequence or structural similarity /// 8553 // hydrogen-exporting ATPase activity, phosphorylative mechanism // inferred from sequence similarity	6812 // cation transport // inferred from electronic annotation /// 15992 // proton transport // inferred from electronic annotation	220 // hydrogen-transporting ATPase V0 domain // inferred from sequence or structural similarity /// 16020 // membrane // inferred from electronic annotation /// 220 // hydrogen-transporting ATPase V0 domain // inferred from sequence similarity	IPR002490 // V-type ATPase, 116 kDa subunit // 1.0E-126
9367	150566_at	-1.29863	1.37082	-12.0601	2.48e-13	1.42e-11	20.2115	FBgn0039299	CG11854	CG11854	CG11854	43037	---	---	---	IPR004272 // Odorant binding protein // 2.9E-58
10561	151760_at	-1.54174	2.52839	-12.0395	2.59e-13	1.48e-11	20.1664	FBgn0033913	CG8468	CG8468	CG8468	36577	15355 // monocarboxylate porter activity // non-traceable author statement	6812 // cation transport // inferred from electronic annotation	---	---
12206	153405_at	-1.44921	2.29313	-12.0093	2.76e-13	1.56e-11	20.1003	FBgn0051778	CG31778	CG31778	CG31778	261616	4867 // serine-type endopeptidase inhibitor activity // inferred from electronic annotation	---	---	---
6534	147733_r_at	-0.938757	0.650592	-12.0011	2.81e-13	1.58e-11	20.0824	FBgn0034809	CG13542	CG13542	CG13542	37653	---	---	---	---
13448	154647_at	-0.755797	0.657452	-11.9948	2.85e-13	1.59e-11	20.0686	FBgn0033688	CG8877	CG8877	CG8877	36304	31202 // RNA splicing factor activity, transesterification mechanism // inferred from sequence or structural similarity /// 31202 // RNA splicing factor activity, transesterification mechanism // inferred from sequence similarity	398 // nuclear mRNA splicing, via spliceosome // inferred from sequence or structural similarity /// 398 // nuclear mRNA splicing, via spliceosome // inferred from sequence similarity	5681 // spliceosome complex // inferred from sequence or structural similarity /// 5682 // snRNP U5 // inferred from sequence or structural similarity /// 5681 // spliceosome complex // inferred from sequence similarity /// 5682 // snRNP U5 // inferred from sequence similarity	IPR000555 // Peptidase M67, Mov34 // 1.6E-19
12119	153318_at	-1.5038	3.23001	-11.9809	2.94e-13	1.63e-11	20.0382	FBgn0027348	CG4501	bgm	bubblegum	44117	4467 // long-chain-fatty-acid-CoA ligase activity // inferred from sequence or structural similarity /// 3824 // catalytic activity // inferred from electronic annotation /// 4467 // long-chain-fatty-acid-CoA ligase activity // inferred from sequence similarity	6631 // fatty acid metabolism // inferred from electronic annotation /// 8152 // metabolism // inferred from electronic annotation	---	IPR000873 // AMP-dependent synthetase and ligase // 1.5E-79
10368	151567_at	-1.03542	2.91602	-11.9631	3.06e-13	1.69e-11	19.9989	FBgn0039844	CG1607	CG1607	CG1607	43707	5279 // amino acid-polyamine transporter activity // inferred from electronic annotation /// 15171 // amino acid transporter activity // inferred from sequence or structural similarity /// 15171 // amino acid transporter activity // inferred from sequence similarity	6520 // amino acid metabolism // inferred from electronic annotation /// 6865 // amino acid transport // inferred from electronic annotation	16020 // membrane // inferred from electronic annotation	IPR004841 // Amino acid permease-associated region // 2.0E-6 /// IPR004841 // Amino acid permease-associated region // 5.9E-12
2578	143777_at	-0.813901	1.16429	-11.9325	3.27e-13	1.79e-11	19.9317	FBgn0015011	---	Ahcy89E	Adenosylhomocysteinase 89E	42043	4013 // adenosylhomocysteinase activity // inferred from sequence or structural similarity /// 4013 // adenosylhomocysteinase activity // non-traceable author statement /// 5515 // protein binding // inferred from physical interaction /// 4013 // adenosylhomocysteinase activity // inferred from electronic annotation /// 16787 // hydrolase activity // inferred from electronic annotation /// 4013 /…	6144 // purine base metabolism // inferred from electronic annotation /// 6730 // one-carbon compound metabolism // inferred from electronic annotation	---	IPR000043 // S-adenosyl-L-homocysteine hydrolase // 1.3E-106 /// IPR000043 // S-adenosyl-L-homocysteine hydrolase // 8.8E-80 /// IPR000043 // S-adenosyl-L-homocysteine hydrolase // 1.7E-61
7781	148980_at	-1.49195	2.59174	-11.9225	3.34e-13	1.83e-11	19.9097	FBgn0036766	CG5506	CG5506	CG5506	39992	---	---	---	---
2426	143625_at	-1.04897	3.67157	-11.9129	3.41e-13	1.86e-11	19.8885	FBgn0010426	CG8210	Vha14	Vacuolar H<up>+</up> ATPase 14kD subunit	36731	8553 // hydrogen-exporting ATPase activity, phosphorylative mechanism // inferred from sequence or structural similarity /// 8553 // hydrogen-exporting ATPase activity, phosphorylative mechanism // non-traceable author statement /// 46933 // hydrogen-transporting ATP synthase activity, rotational mechanism // inferred from electronic annotation /// 46961 // hydrogen-transporting ATPase activity, …	15986 // ATP synthesis coupled proton transport // inferred from electronic annotation /// 15992 // proton transport // non-traceable author statement /// 6754 // ATP biosynthesis // inferred from electronic annotation /// 6810 // transport // inferred from electronic annotation /// 6811 // ion transport // inferred from electronic annotation /// 15992 // proton transport // inferred from electro…	221 // hydrogen-transporting ATPase V1 domain // inferred from sequence or structural similarity /// 221 // hydrogen-transporting ATPase V1 domain // non-traceable author statement /// 16469 // proton-transporting two-sector ATPase complex // inferred from electronic annotation /// 221 // hydrogen-transporting ATPase V1 domain // inferred from sequence similarity	IPR008218 // Vacuolar H+-transporting two-sector ATPase, F subunit // 2.5E-55
2042	143241_at	-1.22526	1.993	-11.7911	4.45e-13	2.39e-11	19.6195	FBgn0002569	CG8694	LvpD	Larval visceral protein D	35825	4556 // alpha-amylase activity // inferred from electronic annotation /// 4558 // alpha-glucosidase activity // inferred from sequence or structural similarity /// 4558 // alpha-glucosidase activity // non-traceable author statement /// 4558 // alpha-glucosidase activity // inferred from electronic annotation /// 16787 // hydrolase activity // inferred from electronic annotation /// 16798 // hydr…	6006 // glucose metabolism // non-traceable author statement /// 5975 // carbohydrate metabolism // inferred from electronic annotation	---	IPR006047 // Alpha amylase, catalytic domain // 1.0E-126
2077	143276_at	-1.51258	6.46096	-11.7909	4.45e-13	2.39e-11	19.6191	FBgn0002868	CG9470	MtnA	Metallothionein A	41202	46872 // metal ion binding // non-traceable author statement /// 5507 // copper ion binding // inferred from electronic annotation /// 8270 // zinc ion binding // inferred from electronic annotation /// 46870 // cadmium ion binding // inferred from electronic annotation /// 46872 // metal ion binding // inferred from electronic annotation	---	---	IPR000966 // Diptera metallothionein, family 5 // 1.6E-20
9431	150630_at	-0.524571	0.721866	-11.762	4.74e-13	2.52e-11	19.5548	FBgn0051090	CG31090	CG31090	CG31090	43136	8324 // cation transporter activity // inferred from electronic annotation /// 8523 // sodium-dependent multivitamin transporter activity // inferred from sequence or structural similarity /// 5515 // protein binding // inferred from physical interaction /// 5215 // transporter activity // inferred from electronic annotation /// 8523 // sodium-dependent multivitamin transporter activity // inferr…	6520 // amino acid metabolism // inferred from electronic annotation /// 6732 // coenzyme metabolism // inferred from electronic annotation /// 6812 // cation transport // inferred from electronic annotation /// 6858 // extracellular transport // inferred from electronic annotation /// 6865 // amino acid transport // inferred from electronic annotation /// 51180 // vitamin transport // inferred f…	16021 // integral to membrane // inferred from sequence or structural similarity /// 16020 // membrane // inferred from electronic annotation /// 16021 // integral to membrane // inferred from electronic annotation /// 16021 // integral to membrane // inferred from sequence similarity	IPR001734 // Na+/solute symporter // 2.3E-8
1869	143068_at	-1.70266	4.03666	-11.7466	4.9e-13	2.6e-11	19.5207	FBgn0000078 /// FBgn0000079	CG18730 /// CG17876	Amy-d /// Amy-p	Amylase distal /// Amylase proximal	36932 /// 47764	4556 // alpha-amylase activity // inferred from sequence or structural similarity /// 4556 // alpha-amylase activity // non-traceable author statement /// 5509 // calcium ion binding // non-traceable author statement /// 4556 // alpha-amylase activity // inferred from electronic annotation /// 5509 // calcium ion binding // inferred from electronic annotation /// 16787 // hydrolase activity // in…	5975 // carbohydrate metabolism // inferred from electronic annotation /// 5975 // carbohydrate metabolism // traceable author statement	---	IPR006048 // Alpha amylase, C-terminal all-beta domain // 7.8E-60 /// IPR006047 // Alpha amylase, catalytic domain // 3.6E-113 /// IPR006048 // Alpha amylase, C-terminal all-beta domain // 1.3E-57
11062	152261_at	-1.20484	3.59981	-11.7313	5.07e-13	2.68e-11	19.4866	FBgn0027844	CG7820	CAH1	Carbonic anhydrase 1	34786	4089 // carbonate dehydratase activity // inferred from sequence or structural similarity /// 8270 // zinc ion binding // inferred from electronic annotation /// 4089 // carbonate dehydratase activity // inferred from electronic annotation /// 4089 // carbonate dehydratase activity // inferred from sequence similarity	6730 // one-carbon compound metabolism // inferred from electronic annotation	---	IPR001148 // Carbonic anhydrase, eukaryotic // 1.9E-104
5927	147126_i_at	-1.52195	3.33344	-11.6733	5.76e-13	3.02e-11	19.3575	FBgn0033788 /// FBgn0033789	CG13323 /// CG13324	CG13323 /// CG13324	CG13323 /// CG13324	36433 /// 36434	---	---	---	---
10754	151953_at	-0.683477	0.923448	-11.673	5.76e-13	3.02e-11	19.3567	FBgn0030562	CG9400	CG9400	CG9400	32385	---	6952 // defense response // inferred from electronic annotation /// 8152 // metabolism // inferred from electronic annotation	5576 // extracellular region // inferred from electronic annotation	IPR001283 // Allergen V5/Tpx-1 related // 1.1E-43
1020	142219_at	-1.26753	2.49334	-11.5955	6.84e-13	3.56e-11	19.1834	FBgn0033366	CG8196	Ance-4	Ance-4	35909	4246 // peptidyl-dipeptidase A activity // non-traceable author statement /// 4246 // peptidyl-dipeptidase A activity // inferred from electronic annotation	6508 // proteolysis // inferred from electronic annotation	16020 // membrane // inferred from electronic annotation	IPR001548 // Peptidase M2, peptidyl-dipeptidase A // 1.0E-11 /// IPR001548 // Peptidase M2, peptidyl-dipeptidase A // 3.7E-18
6081	147280_at	-0.928218	2.01093	-11.5797	7.08e-13	3.66e-11	19.1479	FBgn0034076	CG8424	CG8424	CG8424	36779	4091 // carboxylesterase activity // inferred from sequence or structural similarity /// 3824 // catalytic activity // inferred from electronic annotation /// 4759 // serine esterase activity // inferred from electronic annotation /// 16787 // hydrolase activity // inferred from electronic annotation /// 4091 // carboxylesterase activity // inferred from sequence similarity	7165 // signal transduction // inferred from electronic annotation /// 7267 // cell-cell signaling // inferred from electronic annotation	---	IPR002018 // Carboxylesterase, type B // 1.0E-126
8411	149610_at	-1.33407	1.20336	-11.5551	7.48e-13	3.85e-11	19.0928	FBgn0037782	CG12813	CG12813	CG12813	41232	---	---	---	IPR003172 // E1 protein and Def2/Der2 allergen // 4.6E-40
5291	146490_at	-1.34882	0.943574	-11.5428	7.69e-13	3.93e-11	19.065	FBgn0053533	CG33533	lectin-37Db	lectin-37Db	3346221	5534 // galactose binding // inferred from sequence or structural similarity /// 5529 // sugar binding // inferred from electronic annotation /// 5534 // galactose binding // inferred from sequence similarity	---	---	IPR001304 // C-type lectin // 4.0E-14
5699	146898_at	-0.789119	1.07099	-11.5067	8.33e-13	4.23e-11	18.9839	FBgn0033437	CG12926	CG12926	CG12926	35996	5386 // carrier activity // inferred from electronic annotation /// 8431 // vitamin E binding // inferred from sequence or structural similarity /// 5215 // transporter activity // inferred from electronic annotation /// 8431 // vitamin E binding // inferred from sequence similarity	6732 // coenzyme metabolism // inferred from electronic annotation /// 6810 // transport // inferred from electronic annotation /// 51189 // prosthetic group metabolism // inferred from electronic annotation	5622 // intracellular // inferred from electronic annotation	IPR001251 // Cellular retinaldehyde-binding)/triple function, C-terminal // 7.8E-24
991	142190_at	-0.85674	2.03891	-11.4628	9.18e-13	4.63e-11	18.8849	FBgn0033981	CG10247	Cyp6a21	Cyp6a21	36665	4497 // monooxygenase activity // inferred from electronic annotation /// 16491 // oxidoreductase activity // inferred from electronic annotation /// 5506 // iron ion binding // inferred from electronic annotation /// 20037 // heme binding // inferred from electronic annotation /// 46872 // metal ion binding // inferred from electronic annotation	6118 // electron transport // inferred from electronic annotation /// 8202 // steroid metabolism // inferred from electronic annotation	5792 // microsome // non-traceable author statement /// 16020 // membrane // non-traceable author statement /// 16020 // membrane // inferred from electronic annotation	IPR001128 // Cytochrome P450 // 2.5E-120
10731	151930_at	-1.41723	4.99359	-11.4091	1.04e-12	5.14e-11	18.7634	FBgn0015324	CG1088	Vha26	Vacuolar H<up>+</up>-ATPase 26kD E subunit	40679	8553 // hydrogen-exporting ATPase activity, phosphorylative mechanism // inferred from sequence or structural similarity /// 8553 // hydrogen-exporting ATPase activity, phosphorylative mechanism // non-traceable author statement /// 46933 // hydrogen-transporting ATP synthase activity, rotational mechanism // inferred from electronic annotation /// 46961 // hydrogen-transporting ATPase activity, …	15986 // ATP synthesis coupled proton transport // inferred from electronic annotation /// 15992 // proton transport // non-traceable author statement /// 6754 // ATP biosynthesis // inferred from electronic annotation /// 6810 // transport // inferred from electronic annotation /// 6811 // ion transport // inferred from electronic annotation /// 15992 // proton transport // inferred from electro…	221 // hydrogen-transporting ATPase V1 domain // inferred from sequence or structural similarity /// 221 // hydrogen-transporting ATPase V1 domain // non-traceable author statement /// 16469 // proton-transporting two-sector ATPase complex // inferred from electronic annotation /// 221 // hydrogen-transporting ATPase V1 domain // inferred from sequence similarity	IPR002842 // H+-transporting two-sector ATPase, E subunit // 4.0E-109
5112	146311_at	-1.99035	3.74234	-11.3964	1.07e-12	5.27e-11	18.7346	FBgn0032472	CG9928	CG9928	CG9928	34704	5515 // protein binding // inferred from physical interaction	---	---	---
9093	150292_at	-0.778276	1.48322	-11.382	1.1e-12	5.41e-11	18.702	FBgn0038849	CG7079	CG7079	CG7079	42488	---	---	---	IPR004272 // Odorant binding protein // 6.3E-53
217	141416_at	-1.46934	0.864768	-11.339	1.21e-12	5.89e-11	18.6045	FBgn0036831	CG6839	CG6839	CG6839	40067	3676 // nucleic acid binding // inferred from electronic annotation /// 4519 // endonuclease activity // inferred from electronic annotation	---	---	IPR001604 // DNA/RNA non-specific endonuclease // 6.3E-80
11708	152907_at	-1.44541	2.26628	-11.2967	1.33e-12	6.43e-11	18.5081	FBgn0004364	CG8896	18w	18 wheeler	37277	4888 // transmembrane receptor activity // inferred from sequence or structural similarity /// 4888 // transmembrane receptor activity // inferred from electronic annotation /// 4888 // transmembrane receptor activity // inferred from sequence similarity	6952 // defense response // traceable author statement /// 6955 // immune response // inferred from expression pattern /// 6961 // antibacterial humoral response (sensu Protostomia) // inferred from mutant phenotype /// 6961 // antibacterial humoral response (sensu Protostomia) // non-traceable author statement /// 6961 // antibacterial humoral response (sensu Protostomia) // traceable author sta…	5624 // membrane fraction // inferred from direct assay /// 5737 // cytoplasm // inferred from direct assay /// 5886 // plasma membrane // inferred from direct assay /// 5886 // plasma membrane // inferred from sequence or structural similarity /// 16021 // integral to membrane // inferred from sequence or structural similarity /// 16020 // membrane // inferred from electronic annotation /// 5886…	IPR001611 // Leucine-rich repeat // 0.14 /// IPR001611 // Leucine-rich repeat // 0.1 /// IPR001611 // Leucine-rich repeat // 0.091 /// IPR001611 // Leucine-rich repeat // 2.0E-4 /// IPR001611 // Leucine-rich repeat // 3.3E-5 /// IPR001611 // Leucine-rich repeat // 0.023 /// IPR001611 // Leucine-rich repeat // 0.0037 /// IPR001611 // Leucine-rich repeat // 0.019 /// IPR001611 // Leucine-rich repea…
6856	148055_at	-1.31541	2.94057	-11.2908	1.35e-12	6.45e-11	18.4946	FBgn0035356	CG16986	CG16986	CG16986	38325	3824 // catalytic activity // inferred from electronic annotation	---	---	IPR006683 // Thioesterase superfamily // 2.5E-17
11403	152602_at	-0.953789	3.03197	-11.2767	1.39e-12	6.64e-11	18.4625	FBgn0038297	CG4196	CG4196	CG4196	41827	5057 // receptor signaling protein activity // inferred from electronic annotation	---	16020 // membrane // inferred from electronic annotation	IPR001727 // Protein of unknown function UPF0016 // 1.1E-31 /// IPR001727 // Protein of unknown function UPF0016 // 2.1E-37
7649	148848_at	-0.763295	1.09798	-11.2494	1.48e-12	6.94e-11	18.4002	FBgn0036571	CG12272	CG12272	CG12272	39766	---	---	---	---
12425	153624_at	-0.771141	3.42582	-11.2432	1.5e-12	7.02e-11	18.386	FBgn0032694	CG15162	MESR3	Misexpression suppressor of ras 3	35116	---	---	---	---
4968	146167_at	-0.849878	1.42026	-11.2369	1.52e-12	7.09e-11	18.3715	FBgn0032266	CG18302	CG18302	CG18302	34452	16298 // lipase activity // inferred from electronic annotation /// 16787 // hydrolase activity // inferred from electronic annotation	6629 // lipid metabolism // inferred from electronic annotation	---	IPR006693 // Ab-hydrolase associated lipase region // 4.0E-22
4251	145450_at	-0.789962	0.34687	-11.2237	1.57e-12	7.26e-11	18.3413	FBgn0031141	CG1304	CG1304	CG1304	33074	4252 // serine-type endopeptidase activity // inferred from sequence or structural similarity /// 4252 // serine-type endopeptidase activity // non-traceable author statement /// 4263 // chymotrypsin activity // inferred from electronic annotation /// 4295 // trypsin activity // inferred from electronic annotation /// 4252 // serine-type endopeptidase activity // inferred from electronic annotati…	6508 // proteolysis // non-traceable author statement /// 6508 // proteolysis // inferred from electronic annotation	---	IPR001254 // Peptidase S1, chymotrypsin // 1.3E-63
10738	151937_at	-1.05819	3.04391	-11.2041	1.64e-12	7.56e-11	18.2965	FBgn0037387	CG1213	CG1213	CG1213	40728	5351 // sugar porter activity // inferred from electronic annotation /// 5355 // glucose transporter activity // inferred from sequence or structural similarity /// 5515 // protein binding // inferred from physical interaction /// 5215 // transporter activity // inferred from electronic annotation /// 5355 // glucose transporter activity // inferred from sequence similarity	5975 // carbohydrate metabolism // inferred from electronic annotation /// 8643 // carbohydrate transport // inferred from electronic annotation /// 6810 // transport // inferred from electronic annotation	16020 // membrane // inferred from electronic annotation /// 16021 // integral to membrane // inferred from electronic annotation	IPR005828 // General substrate transporter // 1.2E-81
11368	152567_at	-1.14395	1.55536	-11.1847	1.72e-12	7.88e-11	18.2521	FBgn0031929	CG18585	CG18585	CG18585	34041	4180 // carboxypeptidase activity // inferred from electronic annotation /// 4182 // carboxypeptidase A activity // inferred from electronic annotation /// 8233 // peptidase activity // inferred from electronic annotation /// 8237 // metallopeptidase activity // inferred from electronic annotation	6508 // proteolysis // inferred from electronic annotation /// 19538 // protein metabolism // inferred from electronic annotation	---	IPR000834 // Peptidase M14, carboxypeptidase A // 6.1E-78 /// IPR003146 // Peptidase M14A, carboxypeptidase activation peptide // 2.5E-8 /// IPR000834 // Peptidase M14, carboxypeptidase A // 6.1E-78 /// IPR003146 // Peptidase M14A, carboxypeptidase activation peptide // 6.0E-6
4186	145385_at	-1.24933	3.51332	-11.1804	1.73e-12	7.93e-11	18.2422	FBgn0031049	CG14214	CG14214	CG14214	32968	8565 // protein transporter activity // inferred from sequence or structural similarity /// 15450 // protein translocase activity // inferred from electronic annotation /// 8565 // protein transporter activity // inferred from sequence similarity	6616 // SRP-dependent cotranslational protein targeting to membrane, translocation // inferred from sequence or structural similarity /// 15031 // protein transport // inferred from sequence or structural similarity /// 16192 // vesicle-mediated transport // inferred from electronic annotation /// 6605 // protein targeting // inferred from electronic annotation /// 6810 // transport // inferred f…	5784 // translocon complex // inferred from sequence or structural similarity /// 30176 // integral to endoplasmic reticulum membrane // inferred from sequence or structural similarity /// 5783 // endoplasmic reticulum // inferred from electronic annotation /// 16020 // membrane // inferred from electronic annotation /// 16021 // integral to membrane // inferred from electronic annotation /// 578…	IPR001901 // Protein secE/sec61-gamma protein // 5.3E-22
8769	149968_at	-1.94784	3.37929	-11.1687	1.78e-12	8.11e-11	18.2154	FBgn0038353	CG5399	CG5399	CG5399	41900	---	---	---	---
11518	152717_at	-0.973851	3.00254	-11.1602	1.81e-12	8.22e-11	18.1958	FBgn0023507	CG3835	CG3835	CG3835	31184	16491 // oxidoreductase activity // inferred from electronic annotation	5975 // carbohydrate metabolism // inferred from electronic annotation /// 6118 // electron transport // inferred from electronic annotation	---	IPR006094 // FAD linked oxidase, N-terminal // 7.4E-64 /// IPR004113 // FAD linked oxidase, C-terminal // 4.7E-89
5063	146262_at	-0.792918	1.26696	-11.1452	1.88e-12	8.45e-11	18.1614	FBgn0032387	CG16965	CG16965	CG16965	34607	4555 // alpha,alpha-trehalase activity // inferred from sequence or structural similarity /// 4645 // phosphorylase activity // inferred from electronic annotation /// 4555 // alpha,alpha-trehalase activity // inferred from sequence similarity	5996 // monosaccharide metabolism // inferred from electronic annotation	---	IPR005195 // Glycoside hydrolase, family 65, central catalytic // 1.0E-126
10970	152169_at	-0.908525	0.41798	-11.0863	2.14e-12	9.54e-11	18.0258	FBgn0036764	CG5535	CG5535	CG5535	39990	15326 // cationic amino acid transporter activity // inferred from sequence or structural similarity /// 5279 // amino acid-polyamine transporter activity // inferred from electronic annotation /// 15326 // cationic amino acid transporter activity // inferred from sequence similarity	6520 // amino acid metabolism // inferred from electronic annotation /// 6865 // amino acid transport // inferred from electronic annotation /// 6865 // amino acid transport // inferred from sequence or structural similarity /// 6810 // transport // inferred from electronic annotation /// 6865 // amino acid transport // inferred from sequence similarity	16020 // membrane // inferred from electronic annotation /// 16021 // integral to membrane // inferred from electronic annotation	IPR004841 // Amino acid permease-associated region // 5.8E-7 /// IPR004841 // Amino acid permease-associated region // 5.4E-13 /// IPR004841 // Amino acid permease-associated region // 5.8E-7 /// IPR004841 // Amino acid permease-associated region // 5.4E-13
4225	145424_at	-0.923958	0.420608	-11.0264	2.46e-12	1.07e-10	17.8876	FBgn0031109	CG11748	Obp19a	Odorant-binding protein 19a	33037	5549 // odorant binding // inferred from sequence or structural similarity /// 5549 // odorant binding // non-traceable author statement /// 5549 // odorant binding // inferred from sequence similarity	6810 // transport // inferred from electronic annotation /// 7606 // sensory perception of chemical stimulus // inferred from sequence or structural similarity /// 19236 // response to pheromone // inferred from sequence or structural similarity /// 42048 // olfactory behavior // inferred from sequence or structural similarity /// 7606 // sensory perception of chemical stimulus // inferred from s…	5576 // extracellular region // inferred from sequence or structural similarity /// 5576 // extracellular region // inferred from sequence similarity	IPR006170 // Pheromone/general odorant binding protein, PBP/GOBP // 1.2E-9 /// IPR006170 // Pheromone/general odorant binding protein, PBP/GOBP // 1.1E-27
12951	154150_at	-1.36341	4.67215	-11.0157	2.52e-12	1.09e-10	17.8628	FBgn0001124	CG8430	Got1	Glutamate oxaloacetate transaminase 1	36782	4069 // aspartate transaminase activity // inferred from direct assay /// 4069 // aspartate transaminase activity // inferred from sequence or structural similarity /// 8483 // transaminase activity // inferred from electronic annotation /// 16740 // transferase activity // inferred from electronic annotation /// 16769 // transferase activity, transferring nitrogenous groups // inferred from elec…	6531 // aspartate metabolism // inferred from sequence or structural similarity /// 6537 // glutamate biosynthesis // traceable author statement /// 6520 // amino acid metabolism // inferred from electronic annotation /// 9058 // biosynthesis // inferred from electronic annotation /// 6531 // aspartate metabolism // inferred from sequence similarity	5759 // mitochondrial matrix // inferred from sequence or structural similarity /// 5759 // mitochondrial matrix // inferred from sequence similarity	IPR004839 // Aminotransferase, class I and II // 2.1E-90 /// IPR004839 // Aminotransferase, class I and II // 2.1E-90
7988	149187_at	-0.948305	4.00642	-11.0018	2.6e-12	1.12e-10	17.8307	FBgn0028663	CG7625	VhaM9.7-2	VhaM9.7-2	40389	8553 // hydrogen-exporting ATPase activity, phosphorylative mechanism // inferred from sequence or structural similarity /// 16791 // phosphoric monoester hydrolase activity // inferred from electronic annotation /// 19204 // nucleotide phosphatase activity // inferred from electronic annotation /// 46933 // hydrogen-transporting ATP synthase activity, rotational mechanism // inferred from electr…	6812 // cation transport // inferred from electronic annotation /// 15986 // ATP synthesis coupled proton transport // inferred from electronic annotation	220 // hydrogen-transporting ATPase V0 domain // inferred from sequence or structural similarity /// 16021 // integral to membrane // inferred from electronic annotation /// 16469 // proton-transporting two-sector ATPase complex // inferred from electronic annotation /// 220 // hydrogen-transporting ATPase V0 domain // inferred from sequence similarity	IPR008389 // ATP synthase subunit H // 6.3E-40
11148	152347_at	-1.37247	2.97396	-10.9659	2.82e-12	1.21e-10	17.7474	FBgn0039628	CG11841	CG11841	CG11841	43430	4252 // serine-type endopeptidase activity // inferred from sequence or structural similarity /// 4263 // chymotrypsin activity // inferred from electronic annotation /// 4295 // trypsin activity // non-traceable author statement /// 4252 // serine-type endopeptidase activity // inferred from electronic annotation /// 4252 // serine-type endopeptidase activity // inferred from sequence similarity	6508 // proteolysis // non-traceable author statement /// 6508 // proteolysis // inferred from electronic annotation	---	IPR001254 // Peptidase S1, chymotrypsin // 2.1E-47 /// IPR001254 // Peptidase S1, chymotrypsin // 3.6E-26
8765	149964_at	-1.97493	1.48989	-10.9389	3e-12	1.29e-10	17.6846	FBgn0038346	CG14872	CG14872	CG14872	41893	---	---	---	---
11726	152925_at	-1.1533	1.30122	-10.9251	3.1e-12	1.32e-10	17.6526	FBgn0037230	CG9780	CG9780	CG9780	40540	4245 // neprilysin activity // inferred from electronic annotation	6508 // proteolysis // inferred from electronic annotation	16020 // membrane // inferred from electronic annotation	IPR000718 // Peptidase M13, neprilysin // 6.3E-5 /// IPR000718 // Peptidase M13, neprilysin // 3.7E-5
2793	143992_at	-0.566619	1.68879	-10.9028	3.26e-12	1.38e-10	17.6006	FBgn0023514	CG14805	CG14805	CG14805	31146	---	---	---	IPR001680 // G-protein beta WD-40 repeat // 1.4E-8 /// IPR001680 // G-protein beta WD-40 repeat // 0.051 /// IPR001680 // G-protein beta WD-40 repeat // 1.4E-4
3827	145026_at	-0.560854	1.0484	-10.8943	3.33e-12	1.4e-10	17.5809	FBgn0030511	CG11158	CG11158	CG11158	32327	16787 // hydrolase activity // inferred from electronic annotation	6139 // nucleobase, nucleoside, nucleotide and nucleic acid metabolism // inferred from electronic annotation /// 6144 // purine base metabolism // inferred from electronic annotation /// 6206 // pyrimidine base metabolism // inferred from electronic annotation	---	IPR001910 // Inosine/uridine-preferring nucleoside hydrolase // 5.7E-48
2746	143945_at	-1.18318	3.60495	-10.8266	3.89e-12	1.61e-10	17.4229	FBgn0020907	CG14904	Scp2	Sarcoplasmic calcium-binding protein 2	42015	3924 // GTPase activity // inferred from direct assay /// 3924 // GTPase activity // inferred from sequence or structural similarity /// 5509 // calcium ion binding // inferred from sequence or structural similarity /// 5509 // calcium ion binding // non-traceable author statement /// 5515 // protein binding // inferred from physical interaction /// 5509 // calcium ion binding // inferred from el…	---	16529 // sarcoplasmic reticulum // inferred from sequence or structural similarity /// 16529 // sarcoplasmic reticulum // inferred from sequence similarity	IPR002048 // Calcium-binding EF-hand // 0.038 /// IPR002048 // Calcium-binding EF-hand // 0.0011 /// IPR002048 // Calcium-binding EF-hand // 0.05
9680	150879_at	-1.21022	2.40793	-10.8116	4.03e-12	1.66e-10	17.3879	FBgn0039755	CG15531	CG15531	CG15531	43592	4768 // stearoyl-CoA 9-desaturase activity // inferred from sequence or structural similarity /// 5506 // iron ion binding // inferred from electronic annotation /// 4768 // stearoyl-CoA 9-desaturase activity // inferred from electronic annotation /// 16491 // oxidoreductase activity // inferred from electronic annotation /// 16717 // oxidoreductase activity, acting on paired donors, with oxidati…	6631 // fatty acid metabolism // inferred from electronic annotation /// 6633 // fatty acid biosynthesis // inferred from electronic annotation /// 8610 // lipid biosynthesis // inferred from electronic annotation	5783 // endoplasmic reticulum // inferred from electronic annotation /// 16020 // membrane // inferred from electronic annotation /// 16021 // integral to membrane // inferred from electronic annotation	IPR005804 // Fatty acid desaturase // 5.4E-23
6066	147265_at	-1.21224	1.15213	-10.8008	4.13e-12	1.69e-10	17.3625	FBgn0034045	CG8249	CG8249	CG8249	36742	5351 // sugar porter activity // inferred from electronic annotation /// 5355 // glucose transporter activity // inferred from sequence or structural similarity /// 5215 // transporter activity // inferred from electronic annotation /// 5355 // glucose transporter activity // inferred from sequence similarity	5975 // carbohydrate metabolism // inferred from electronic annotation /// 8643 // carbohydrate transport // inferred from electronic annotation /// 6810 // transport // inferred from electronic annotation	16020 // membrane // inferred from electronic annotation /// 16021 // integral to membrane // inferred from electronic annotation	IPR005828 // General substrate transporter // 5.0E-57
7029	148228_at	-1.37546	1.37282	-10.799	4.14e-12	1.69e-10	17.3583	FBgn0035619	CG10592	CG10592	CG10592	38632	4035 // alkaline phosphatase activity // inferred from sequence or structural similarity /// 19204 // nucleotide phosphatase activity // inferred from electronic annotation /// 4035 // alkaline phosphatase activity // inferred from sequence similarity	1501 // skeletal development // inferred from electronic annotation /// 7498 // mesoderm development // inferred from electronic annotation /// 8152 // metabolism // inferred from electronic annotation	---	IPR001952 // Alkaline phosphatase // 9.2E-84
10921	152120_at	-0.901851	4.46055	-10.7997	4.14e-12	1.69e-10	17.36	FBgn0038194	CG3050	Cyp6d5	Cyp6d5	41706	4497 // monooxygenase activity // inferred from electronic annotation /// 16491 // oxidoreductase activity // inferred from electronic annotation /// 5506 // iron ion binding // inferred from electronic annotation /// 5515 // protein binding // inferred from physical interaction /// 20037 // heme binding // inferred from electronic annotation /// 46872 // metal ion binding // inferred from electr…	6118 // electron transport // inferred from electronic annotation /// 8202 // steroid metabolism // inferred from electronic annotation	5792 // microsome // non-traceable author statement /// 16020 // membrane // non-traceable author statement /// 5783 // endoplasmic reticulum // inferred from electronic annotation /// 5792 // microsome // inferred from electronic annotation /// 16020 // membrane // inferred from electronic annotation	IPR001128 // Cytochrome P450 // 2.8E-88 /// IPR001128 // Cytochrome P450 // 8.7E-32
13593	154792_at	-0.811057	2.65417	-10.7996	4.14e-12	1.69e-10	17.3597	FBgn0013726	CG8705	pnut	peanut	35801	3779 // actin binding // inferred from direct assay /// 3924 // GTPase activity // inferred from electronic annotation /// 5200 // structural constituent of cytoskeleton // inferred from electronic annotation /// 5525 // GTP binding // inferred from electronic annotation /// 8017 // microtubule binding // inferred from direct assay /// 16787 // hydrolase activity // inferred from electronic annot…	910 // cytokinesis // inferred from mutant phenotype /// 910 // cytokinesis // inferred from sequence or structural similarity /// 910 // cytokinesis // non-traceable author statement /// 910 // cytokinesis // traceable author statement /// 915 // cytokinesis, contractile ring formation // non-traceable author statement /// 6903 // vesicle targeting // traceable author statement /// 6904 // vesic…	5940 // septin ring // inferred from sequence or structural similarity /// 16324 // apical plasma membrane // non-traceable author statement /// 45171 // intercellular bridge // non-traceable author statement /// 45172 // ring canal (sensu Insecta) // non-traceable author statement /// 5940 // septin ring // inferred from sequence similarity	IPR000038 // Cell division/GTP binding protein // 1.0E-126
5360	146559_at	-1.03491	4.53868	-10.7665	4.47e-12	1.81e-10	17.2821	FBgn0032897	CG9336	CG9336	CG9336	35355	---	---	---	---
13060	154259_at	-1.25039	1.4134	-10.7675	4.46e-12	1.81e-10	17.2844	FBgn0028990	CG11331	Spn27A	Serpin-27A	45815	4857 // enzyme inhibitor activity // inferred from direct assay /// 4867 // serine-type endopeptidase inhibitor activity // inferred from sequence or structural similarity /// 4867 // serine-type endopeptidase inhibitor activity // non-traceable author statement /// 4867 // serine-type endopeptidase inhibitor activity // inferred from electronic annotation /// 4867 // serine-type endopeptidase in…	8063 // Toll signaling pathway // inferred from direct assay /// 9611 // response to wounding // inferred from mutant phenotype /// 9613 // response to pest, pathogen or parasite // inferred from mutant phenotype /// 9950 // dorsal/ventral axis specification // inferred from mutant phenotype /// 35006 // melanization defense response // traceable author statement /// 35009 // negative regulation …	---	IPR000215 // Serpin // 4.8E-74
12450	153649_at	-1.1973	4.15053	-10.7322	4.84e-12	1.94e-10	17.2016	FBgn0033393	CG8029	CG8029	CG8029	35944	8900 // hydrogen:potassium-exchanging ATPase activity // inferred from sequence or structural similarity /// 46933 // hydrogen-transporting ATP synthase activity, rotational mechanism // inferred from electronic annotation /// 46961 // hydrogen-transporting ATPase activity, rotational mechanism // inferred from electronic annotation /// 5515 // protein binding // inferred from physical interactio…	15986 // ATP synthesis coupled proton transport // inferred from electronic annotation	5889 // hydrogen:potassium-exchanging ATPase complex // inferred from sequence or structural similarity /// 16469 // proton-transporting two-sector ATPase complex // inferred from electronic annotation /// 16021 // integral to membrane // inferred from electronic annotation /// 5889 // hydrogen:potassium-exchanging ATPase complex // inferred from sequence similarity	IPR008388 // Vacuolar ATP synthase subunit S1 // 1.0E-126
2583	143782_at	-0.995452	2.96873	-10.7129	5.06e-12	2.02e-10	17.1562	FBgn0015037	CG10842	Cyp4p1	Cytochrome P450-4p1	45524	4497 // monooxygenase activity // inferred from electronic annotation /// 16491 // oxidoreductase activity // inferred from electronic annotation /// 5515 // protein binding // inferred from physical interaction /// 5506 // iron ion binding // inferred from electronic annotation /// 20037 // heme binding // inferred from electronic annotation /// 46872 // metal ion binding // inferred from electr…	6118 // electron transport // inferred from electronic annotation /// 8202 // steroid metabolism // inferred from electronic annotation	5792 // microsome // non-traceable author statement /// 16020 // membrane // non-traceable author statement /// 5783 // endoplasmic reticulum // inferred from electronic annotation /// 5792 // microsome // inferred from electronic annotation /// 16020 // membrane // inferred from electronic annotation	IPR001128 // Cytochrome P450 // 7.7E-79
7229	148428_at	-1.09774	2.91105	-10.6959	5.26e-12	2.09e-10	17.1162	FBgn0035933	CG13309	CG13309	CG13309	39012	8061 // chitin binding // inferred from electronic annotation	6030 // chitin metabolism // inferred from electronic annotation	5576 // extracellular region // inferred from electronic annotation	---
11488	152687_at	-1.56605	2.40777	-10.6934	5.29e-12	2.1e-10	17.1104	FBgn0030688	CG8952	CG8952	CG8952	32525	4252 // serine-type endopeptidase activity // inferred from sequence or structural similarity /// 4263 // chymotrypsin activity // inferred from electronic annotation /// 4295 // trypsin activity // inferred from electronic annotation /// 42708 // elastase activity // non-traceable author statement /// 4252 // serine-type endopeptidase activity // inferred from electronic annotation /// 4252 // s…	6508 // proteolysis // non-traceable author statement /// 6508 // proteolysis // inferred from electronic annotation	---	IPR001254 // Peptidase S1, chymotrypsin // 3.2E-59
11652	152851_at	-0.999546	3.09263	-10.674	5.54e-12	2.18e-10	17.0645	FBgn0032618	CG31743	CG31743	CG31743	326156	16232 // HNK-1 sulfotransferase activity // inferred from sequence or structural similarity /// 5515 // protein binding // inferred from physical interaction /// 16232 // HNK-1 sulfotransferase activity // inferred from sequence similarity	---	---	IPR005331 // Chondroitin 4-O-sulfotransferase // 1.0E-126
11482	152681_at	-1.10955	2.11403	-10.6612	5.71e-12	2.24e-10	17.0344	FBgn0033624	CG12384	CG12384	CG12384	36224	8047 // enzyme activator activity // inferred from electronic annotation /// 30234 // enzyme regulator activity // inferred from electronic annotation	6915 // apoptosis // inferred from electronic annotation /// 6917 // induction of apoptosis // inferred from electronic annotation /// 7165 // signal transduction // inferred from electronic annotation /// 7166 // cell surface receptor linked signal transduction // inferred from electronic annotation /// 7242 // intracellular signaling cascade // inferred from electronic annotation /// 7249 // I-…	---	---
5533	146732_at	-0.861244	2.20635	-10.6472	5.9e-12	2.31e-10	17.0012	FBgn0033162	CG1707	CG1707	CG1707	35656	4462 // lactoylglutathione lyase activity // inferred from sequence or structural similarity /// 4462 // lactoylglutathione lyase activity // inferred from sequence similarity	5975 // carbohydrate metabolism // inferred from electronic annotation	---	IPR004360 // Glyoxalase/Bleomycin resistance protein/dioxygenase domain // 1.2E-35
11208	152407_at	-1.47775	3.89983	-10.6456	5.92e-12	2.31e-10	16.9974	FBgn0033246	CG11198	CG11198	CG11198	35761	3989 // acetyl-CoA carboxylase activity // inferred from sequence or structural similarity /// 4075 // biotin carboxylase activity // inferred from electronic annotation /// 5524 // ATP binding // inferred from electronic annotation /// 9374 // biotin binding // inferred from electronic annotation /// 3824 // catalytic activity // inferred from electronic annotation /// 16874 // ligase activity /…	6633 // fatty acid biosynthesis // inferred from electronic annotation /// 8152 // metabolism // inferred from electronic annotation	9343 // biotin carboxylase complex // inferred from electronic annotation	IPR005482 // Biotin carboxylase, C-terminal // 4.5E-53 /// IPR005481 // Carbamoyl-phosphate synthetase large chain, N-terminal // 1.7E-57 /// IPR005479 // Carbamoyl-phosphate synthase L chain, ATP-binding // 2.8E-122 /// IPR000022 // Carboxyl transferase // 1.0E-126 /// IPR000089 // Biotin/lipoyl attachment // 7.1E-19 /// IPR005482 // Biotin carboxylase, C-terminal // 4.5E-53 /// IPR005481 // Car…
10350	151549_i_at	-1.38223	1.81934	-10.6407	5.99e-12	2.33e-10	16.9859	FBgn0051017	CG31017	PH4NE3	prolyl-4-hydroxylase-alpha NE3	326114	4656 // procollagen-proline 4-dioxygenase activity // inferred from sequence or structural similarity /// 16706 // oxidoreductase activity, acting on paired donors, with incorporation or reduction of molecular oxygen, 2-oxoglutarate as one donor, and incorporation of one atom each of oxygen into both donors // inferred from electronic annotation /// 4656 // procollagen-proline 4-dioxygenase activ…	6464 // protein modification // inferred from electronic annotation /// 19538 // protein metabolism // inferred from electronic annotation	16222 // procollagen-proline, 2-oxoglutarate-4-dioxygenase complex // Unknown /// 16222 // procollagen-proline, 2-oxoglutarate-4-dioxygenase complex // inferred from curator	IPR005123 // 2OG-Fe(II) oxygenase superfamily // 1.7E-7
91	141290_at	-0.979921	3.17527	-10.6326	6.1e-12	2.37e-10	16.9668	FBgn0034494	CG10444	CG10444	CG10444	37294	8324 // cation transporter activity // inferred from electronic annotation /// 8523 // sodium-dependent multivitamin transporter activity // inferred from sequence or structural similarity /// 5215 // transporter activity // inferred from electronic annotation /// 8523 // sodium-dependent multivitamin transporter activity // inferred from sequence similarity	6732 // coenzyme metabolism // inferred from electronic annotation /// 6812 // cation transport // inferred from electronic annotation /// 6858 // extracellular transport // inferred from electronic annotation /// 51189 // prosthetic group metabolism // inferred from electronic annotation /// 6810 // transport // inferred from electronic annotation /// 6811 // ion transport // inferred from elect…	16020 // membrane // inferred from electronic annotation /// 16021 // integral to membrane // inferred from electronic annotation	IPR001734 // Na+/solute symporter // 2.2E-7 /// IPR001734 // Na+/solute symporter // 7.9E-5
10634	151833_at	-0.889939	1.42645	-10.6157	6.35e-12	2.44e-10	16.9269	FBgn0030163	CG1791	CG1791	CG1791	31927	5102 // receptor binding // inferred from electronic annotation	---	---	IPR002181 // Fibrinogen, beta/gamma chain, C-terminal globular // 7.8E-48
2500	143699_at	-0.810976	0.717104	-10.6067	6.48e-12	2.47e-10	16.9055	FBgn0011834	CG2071	Ser6	Serine protease 6	33073	4252 // serine-type endopeptidase activity // inferred from sequence or structural similarity /// 4252 // serine-type endopeptidase activity // non-traceable author statement /// 4263 // chymotrypsin activity // inferred from electronic annotation /// 4295 // trypsin activity // inferred from electronic annotation /// 8236 // serine-type peptidase activity // non-traceable author statement /// 42…	6508 // proteolysis // non-traceable author statement /// 6508 // proteolysis // inferred from electronic annotation	---	IPR001254 // Peptidase S1, chymotrypsin // 9.9E-67
8168	149367_at	-0.514281	-0.0854216	-10.5941	6.67e-12	2.53e-10	16.8757	FBgn0046876	CG31557	Obp83ef	Odorant-binding protein 83ef	40747	5549 // odorant binding // inferred from sequence or structural similarity /// 5549 // odorant binding // non-traceable author statement /// 5549 // odorant binding // inferred from electronic annotation /// 5549 // odorant binding // inferred from sequence similarity	6810 // transport // inferred from electronic annotation /// 7606 // sensory perception of chemical stimulus // inferred from sequence or structural similarity /// 7606 // sensory perception of chemical stimulus // inferred from sequence similarity	---	---
11392	152591_at	-1.00316	2.88818	-10.5907	6.73e-12	2.54e-10	16.8676	FBgn0034200	CG11395	CG11395	CG11395	36937	---	---	---	---
7864	149063_at	-1.24176	1.79119	-10.5837	6.84e-12	2.58e-10	16.8511	FBgn0036891	CG9372	CG9372	CG9372	40137	4263 // chymotrypsin activity // inferred from electronic annotation /// 4295 // trypsin activity // non-traceable author statement /// 8236 // serine-type peptidase activity // inferred from sequence or structural similarity /// 4252 // serine-type endopeptidase activity // inferred from electronic annotation /// 8233 // peptidase activity // inferred from electronic annotation /// 16787 // hydr…	6508 // proteolysis // non-traceable author statement /// 6508 // proteolysis // inferred from electronic annotation	---	IPR001254 // Peptidase S1, chymotrypsin // 8.7E-76
5510	146709_at	-0.923734	3.94974	-10.5653	7.14e-12	2.67e-10	16.8074	FBgn0029506	CG10106	Tsp42Ee	Tetraspanin 42Ee	35614	---	---	16021 // integral to membrane // inferred from sequence or structural similarity /// 16021 // integral to membrane // inferred from electronic annotation /// 16021 // integral to membrane // inferred from sequence similarity	IPR000301 // CD9/CD37/CD63 antigen // 4.0E-56
8708	149907_r_at	-1.25206	1.5775	-10.5663	7.12e-12	2.67e-10	16.8098	FBgn0038243	CG8066	CG8066	CG8066	41766	4869 // cysteine protease inhibitor activity // inferred from sequence or structural similarity /// 5515 // protein binding // inferred from physical interaction /// 4869 // cysteine protease inhibitor activity // inferred from electronic annotation /// 4869 // cysteine protease inhibitor activity // inferred from sequence similarity	---	---	IPR000010 // Cysteine protease inhibitor // 9.8E-12
6139	147338_at	-1.39355	1.00157	-10.5274	7.8e-12	2.89e-10	16.7175	FBgn0034165	CG6435	CG6435	CG6435	36894	---	6952 // defense response // inferred from electronic annotation /// 42742 // defense response to bacteria // inferred from electronic annotation	---	IPR008597 // Destabilase // 2.9E-44 /// IPR008597 // Destabilase // 3.5E-53
9079	150278_at	-0.63494	2.36651	-10.5264	7.82e-12	2.89e-10	16.715	FBgn0038830	CG17272	CG17272	CG17272	42465	5509 // calcium ion binding // inferred from sequence or structural similarity /// 5516 // calmodulin binding // inferred from electronic annotation /// 5515 // protein binding // inferred from physical interaction /// 5509 // calcium ion binding // inferred from electronic annotation /// 5509 // calcium ion binding // inferred from sequence similarity	19722 // calcium-mediated signaling // inferred from electronic annotation	---	IPR002048 // Calcium-binding EF-hand // 0.032
8500	149699_at	-1.18775	2.318	-10.5188	7.96e-12	2.93e-10	16.697	FBgn0037934	CG6830	CG6830	CG6830	41408	16301 // kinase activity // inferred from electronic annotation /// 16740 // transferase activity // inferred from electronic annotation	---	---	IPR004119 // Protein of unknown function DUF227 // 1.2E-114 /// IPR004119 // Protein of unknown function DUF227 // 1.5E-117
13127	154326_at	-0.6628	2.64958	-10.4975	8.37e-12	3.07e-10	16.6465	FBgn0027070	CG17322	CG17322	CG17322	35139	3851 // 2-hydroxyacylsphingosine 1-beta-galactosyltransferase activity // inferred from sequence or structural similarity /// 16740 // transferase activity // inferred from electronic annotation /// 16757 // transferase activity, transferring glycosyl groups // inferred from electronic annotation /// 16758 // transferase activity, transferring hexosyl groups // inferred from electronic annotation…	5976 // polysaccharide metabolism // inferred from electronic annotation /// 6952 // defense response // inferred from electronic annotation /// 8202 // steroid metabolism // inferred from electronic annotation /// 9636 // response to toxin // inferred from electronic annotation /// 8152 // metabolism // inferred from electronic annotation	---	IPR002213 // UDP-glucoronosyl/UDP-glucosyl transferase // 2.4E-40
5928	147127_s_at	-1.66684	4.20529	-10.481	8.7e-12	3.17e-10	16.607	FBgn0033789 /// FBgn0033788	CG13323 /// CG13324	CG13324 /// CG13323	CG13324 /// CG13323	36433 /// 36434	---	---	---	---
10889	152088_at	-1.6858	3.52239	-10.4823	8.67e-12	3.17e-10	16.6102	FBgn0027579	CG5508	CG5508	CG5508	43350	4366 // glycerol-3-phosphate O-acyltransferase activity // inferred from sequence or structural similarity /// 5515 // protein binding // inferred from physical interaction /// 4366 // glycerol-3-phosphate O-acyltransferase activity // inferred from electronic annotation /// 8415 // acyltransferase activity // inferred from electronic annotation /// 4366 // glycerol-3-phosphate O-acyltransferase …	7009 // plasma membrane organization and biogenesis // inferred from sequence or structural similarity /// 8654 // phospholipid biosynthesis // inferred from sequence or structural similarity /// 8152 // metabolism // inferred from electronic annotation /// 8654 // phospholipid biosynthesis // inferred from electronic annotation /// 44255 // cellular lipid metabolism // inferred from electronic a…	5741 // mitochondrial outer membrane // inferred from sequence or structural similarity /// 16020 // membrane // inferred from electronic annotation /// 5741 // mitochondrial outer membrane // inferred from sequence similarity	IPR002123 // Phospholipid/glycerol acyltransferase // 2.1E-20 /// IPR002123 // Phospholipid/glycerol acyltransferase // 2.1E-20 /// IPR002123 // Phospholipid/glycerol acyltransferase // 2.1E-20
12211	153410_at	-1.20798	1.25723	-10.4814	8.69e-12	3.17e-10	16.608	FBgn0041630	CG1318	Hexo1	Hexosaminidase 1	38528	4563 // beta-N-acetylhexosaminidase activity // inferred from sequence or structural similarity /// 16799 // hydrolase activity, hydrolyzing N-glycosyl compounds // inferred from electronic annotation /// 4563 // beta-N-acetylhexosaminidase activity // inferred from electronic annotation /// 4563 // beta-N-acetylhexosaminidase activity // inferred from sequence similarity	5976 // polysaccharide metabolism // inferred from electronic annotation /// 5975 // carbohydrate metabolism // inferred from electronic annotation	---	IPR001540 // Glycoside hydrolase, family 20 // 1.0E-126 /// IPR001540 // Glycoside hydrolase, family 20 // 2.8E-23 /// IPR001540 // Glycoside hydrolase, family 20 // 4.1E-116
6241	147440_at	-0.819837	1.19524	-10.4754	8.82e-12	3.2e-10	16.5937	FBgn0034350 /// FBgn0050120	CG5189	CG5189 /// CG30120	CG5189 /// CG30120	246467 /// 37122	---	---	5794 // Golgi apparatus // non-traceable author statement	IPR004942 // Roadblock/LC7 family // 1.8E-21
13047	154246_at	-0.852201	2.37228	-10.4493	9.37e-12	3.39e-10	16.5315	FBgn0030891	CG7098	dik	diskette	32787	4402 // histone acetyltransferase activity // inferred from sequence or structural similarity /// 5515 // protein binding // inferred from physical interaction /// 4402 // histone acetyltransferase activity // inferred from sequence similarity	---	123 // histone acetyltransferase complex // inferred from sequence or structural similarity /// 5671 // Ada2/Gcn5/Ada3 transcription activator complex // non-traceable author statement /// 5700 // polytene chromosome // inferred from direct assay /// 123 // histone acetyltransferase complex // inferred from sequence similarity	---
11732	152931_at	-0.635357	0.912662	-10.4231	9.97e-12	3.58e-10	16.4689	FBgn0033949	CG10131	CG10131	CG10131	36624	5198 // structural molecule activity // inferred from electronic annotation /// 16491 // oxidoreductase activity // inferred from electronic annotation	6629 // lipid metabolism // inferred from electronic annotation /// 6631 // fatty acid metabolism // inferred from electronic annotation /// 7010 // cytoskeleton organization and biogenesis // inferred from electronic annotation	---	IPR006108 // 3-hydroxyacyl-CoA dehydrogenase, C-terminal // 5.6E-24 /// IPR006176 // 3-hydroxyacyl-CoA dehydrogenase, NAD binding domain // 2.3E-44
6972	148171_at	-0.896208	1.1002	-10.4148	1.02e-11	3.64e-10	16.4489	FBgn0053514	CG33514	CG33514	CG33514	3346239	8431 // vitamin E binding // inferred from sequence or structural similarity /// 5215 // transporter activity // inferred from electronic annotation /// 8431 // vitamin E binding // inferred from sequence similarity	6810 // transport // inferred from electronic annotation	5622 // intracellular // inferred from electronic annotation	IPR001251 // Cellular retinaldehyde-binding)/triple function, C-terminal // 6.9E-23
11899	153098_at	-1.49031	3.04911	-10.3951	1.07e-11	3.8e-10	16.402	FBgn0039102	CG16705	CG16705	CG16705	42791	4263 // chymotrypsin activity // inferred from electronic annotation /// 4295 // trypsin activity // non-traceable author statement /// 8439 // monophenol monooxygenase activator activity // inferred from sequence or structural similarity /// 4252 // serine-type endopeptidase activity // inferred from electronic annotation /// 8233 // peptidase activity // inferred from electronic annotation /// …	6508 // proteolysis // non-traceable author statement /// 6521 // regulation of amino acid metabolism // inferred from electronic annotation /// 8652 // amino acid biosynthesis // inferred from electronic annotation /// 6508 // proteolysis // inferred from electronic annotation	---	IPR001254 // Peptidase S1, chymotrypsin // 8.0E-69
9213	150412_at	-1.26785	1.68184	-10.3886	1.08e-11	3.85e-10	16.3862	FBgn0039040	CG13833	CG13833	CG13833	42718	16491 // oxidoreductase activity // inferred from sequence or structural similarity /// 16491 // oxidoreductase activity // inferred from electronic annotation /// 16491 // oxidoreductase activity // inferred from sequence similarity	7601 // visual perception // inferred from electronic annotation /// 8152 // metabolism // inferred from electronic annotation	---	IPR002198 // Short-chain dehydrogenase/reductase SDR // 1.1E-44
11064	152263_at	-1.03529	1.54458	-10.3695	1.13e-11	4.01e-10	16.3405	FBgn0038179	CG9312	CG9312	CG9312	41686	5515 // protein binding // inferred from physical interaction	---	---	---
959	142158_at	-0.855551	4.15881	-10.345	1.2e-11	4.21e-10	16.2819	FBgn0028662	CG7007	VhaPPA1-1	VhaPPA1-1	45247	8553 // hydrogen-exporting ATPase activity, phosphorylative mechanism // inferred from sequence or structural similarity /// 46933 // hydrogen-transporting ATP synthase activity, rotational mechanism // inferred from electronic annotation /// 46961 // hydrogen-transporting ATPase activity, rotational mechanism // inferred from electronic annotation /// 8553 // hydrogen-exporting ATPase activity, …	6812 // cation transport // inferred from electronic annotation /// 15986 // ATP synthesis coupled proton transport // inferred from electronic annotation	220 // hydrogen-transporting ATPase V0 domain // inferred from sequence or structural similarity /// 16469 // proton-transporting two-sector ATPase complex // inferred from electronic annotation /// 16020 // membrane // inferred from electronic annotation /// 16021 // integral to membrane // inferred from electronic annotation /// 220 // hydrogen-transporting ATPase V0 domain // inferred from seq…	IPR002379 // H+-transporting two-sector ATPase, C subunit // 3.3E-7
11348	152547_at	-0.650972	3.4636	-10.3283	1.25e-11	4.37e-10	16.2417	FBgn0033385	CG8055	CG8055	CG8055	35933	5386 // carrier activity // inferred from electronic annotation /// 5488 // binding // inferred from electronic annotation /// 5515 // protein binding // inferred from physical interaction /// 42802 // identical protein binding // inferred from physical interaction	6886 // intracellular protein transport // inferred from electronic annotation	---	IPR005024 // Snf7 // 4.7E-72
200	141399_at	-0.792559	0.620323	-10.3084	1.31e-11	4.57e-10	16.1938	FBgn0020506	CG8221	Amyrel	Amyrel	36863	4556 // alpha-amylase activity // non-traceable author statement /// 4574 // oligo-1,6-glucosidase activity // non-traceable author statement /// 4556 // alpha-amylase activity // inferred from electronic annotation /// 5509 // calcium ion binding // inferred from electronic annotation /// 16787 // hydrolase activity // inferred from electronic annotation /// 16798 // hydrolase activity, acting o…	5975 // carbohydrate metabolism // inferred from electronic annotation	---	IPR006048 // Alpha amylase, C-terminal all-beta domain // 8.8E-53 /// IPR006047 // Alpha amylase, catalytic domain // 2.1E-84
12995	154194_at	-0.589973	0.123179	-10.2868	1.38e-11	4.8e-10	16.1419	FBgn0030720	CG8939	CG8939	CG8939	32568	3676 // nucleic acid binding // inferred from electronic annotation /// 8649 // rRNA methyltransferase activity // inferred from sequence or structural similarity /// 8649 // rRNA methyltransferase activity // inferred from sequence similarity	6364 // rRNA processing // inferred from sequence or structural similarity /// 16072 // rRNA metabolism // inferred from electronic annotation /// 6364 // rRNA processing // inferred from sequence similarity	5730 // nucleolus // inferred from sequence or structural similarity /// 5730 // nucleolus // inferred from sequence similarity	IPR002877 // Ribosomal RNA methyltransferase RrmJ/FtsJ // 1.0E-87
10410	151609_at	-1.21735	2.64814	-10.2785	1.4e-11	4.88e-10	16.122	---	---	---	---	---	---	---	---	---
1063	142262_at	-1.11251	1.64495	-10.2762	1.41e-11	4.9e-10	16.1164	FBgn0033448	CG1623	CG1623	CG1623	36011	---	---	---	---
2269	143468_at	-1.37909	1.43388	-10.2669	1.44e-11	5e-10	16.0939	FBgn0004429	CG9116	LysP	Lysozyme P	38129	3796 // lysozyme activity // inferred from sequence or structural similarity /// 3796 // lysozyme activity // non-traceable author statement /// 3796 // lysozyme activity // inferred from electronic annotation /// 3824 // catalytic activity // inferred from electronic annotation /// 16787 // hydrolase activity // inferred from electronic annotation /// 16798 // hydrolase activity, acting on glyco…	6960 // antimicrobial humoral response (sensu Protostomia) // non-traceable author statement /// 16998 // cell wall catabolism // inferred from electronic annotation /// 5975 // carbohydrate metabolism // inferred from electronic annotation /// 19835 // cytolysis // inferred from electronic annotation /// 42742 // defense response to bacteria // inferred from electronic annotation	5576 // extracellular region // inferred from electronic annotation	IPR001916 // Glycoside hydrolase, family 22 // 1.7E-59
12262	153461_at	-0.823915	1.75773	-10.242	1.53e-11	5.27e-10	16.0339	FBgn0050503	CG30503	CG30503	CG30503	246656	5515 // protein binding // inferred from physical interaction /// 4623 // phospholipase A2 activity // inferred from electronic annotation /// 5509 // calcium ion binding // inferred from electronic annotation /// 166 // nucleotide binding // inferred from electronic annotation /// 5525 // GTP binding // inferred from electronic annotation	6644 // phospholipid metabolism // inferred from electronic annotation /// 7264 // small GTPase mediated signal transduction // inferred from electronic annotation	5576 // extracellular region // inferred from electronic annotation /// 16020 // membrane // inferred from electronic annotation	IPR008774 // A2 Phospholipase // 1.7E-67
5540	146739_at	-0.617718	0.531877	-10.1957	1.71e-11	5.86e-10	15.9219	FBgn0033169	CG11123	CG11123	CG11123	35664	3729 // mRNA binding // inferred from electronic annotation /// 3723 // RNA binding // inferred from electronic annotation /// 5488 // binding // inferred from electronic annotation	16071 // mRNA metabolism // inferred from electronic annotation	---	IPR001313 // Pumilio/Puf RNA-binding // 1.8E-5
8319	149518_at	-1.13684	1.64434	-10.1873	1.75e-11	5.97e-10	15.9016	FBgn0037612	CG8112	CG8112	CG8112	41033	4772 // sterol O-acyltransferase activity // inferred from sequence or structural similarity /// 4772 // sterol O-acyltransferase activity // inferred from sequence similarity	8203 // cholesterol metabolism // inferred from electronic annotation	---	IPR004299 // Membrane bound O-acyl transferase, MBOAT // 4.7E-23
9584	150783_at	-0.77521	1.6404	-10.1666	1.83e-11	6.22e-10	15.8514	FBgn0039597	CG9997	CG9997	CG9997	43395	---	---	---	---
7060	148259_at	-1.01463	2.51649	-10.1641	1.85e-11	6.25e-10	15.8453	FBgn0035673	CG6602	CG6602	CG6602	38691	---	---	---	---
10774	151973_at	-0.939528	3.45387	-10.1332	1.99e-11	6.69e-10	15.7705	FBgn0042138	CG18815	CG18815	CG18815	59176	4620 // phospholipase activity // inferred from electronic annotation /// 16298 // lipase activity // inferred from electronic annotation /// 16787 // hydrolase activity // inferred from electronic annotation /// 16788 // hydrolase activity, acting on ester bonds // inferred from electronic annotation /// 3824 // catalytic activity // inferred from electronic annotation	6629 // lipid metabolism // inferred from electronic annotation /// 8152 // metabolism // inferred from electronic annotation /// 6631 // fatty acid metabolism // inferred from electronic annotation	---	IPR003140 // Phospholipase/Carboxylesterase // 8.9E-91
1928	143127_at	-1.54502	1.82469	-10.1048	2.13e-11	7.15e-10	15.7015	FBgn0000473	CG9438	Cyp6a2	Cytochrome P450-6a2	35587	4497 // monooxygenase activity // inferred from electronic annotation /// 16491 // oxidoreductase activity // inferred from electronic annotation /// 5506 // iron ion binding // inferred from electronic annotation /// 20037 // heme binding // inferred from electronic annotation /// 46872 // metal ion binding // inferred from electronic annotation	6118 // electron transport // inferred from electronic annotation /// 8202 // steroid metabolism // inferred from electronic annotation /// 17085 // response to insecticide // inferred from direct assay	5792 // microsome // non-traceable author statement /// 16020 // membrane // non-traceable author statement /// 16020 // membrane // inferred from electronic annotation	IPR001128 // Cytochrome P450 // 1.0E-126
8992	150191_at	-1.02571	1.62933	-10.0948	2.18e-11	7.3e-10	15.6771	FBgn0038700	CG3734	CG3734	CG3734	42318	8236 // serine-type peptidase activity // inferred from sequence or structural similarity /// 3824 // catalytic activity // inferred from electronic annotation /// 8233 // peptidase activity // inferred from electronic annotation /// 8236 // serine-type peptidase activity // inferred from electronic annotation /// 8236 // serine-type peptidase activity // inferred from sequence similarity	6508 // proteolysis // inferred from electronic annotation	5764 // lysosome // inferred from electronic annotation	IPR008758 // Peptidase S28 // 1.0E-126
1172	142371_at	-1.21818	1.59098	-10.056	2.39e-11	7.98e-10	15.5825	FBgn0016684	CG10207	NaPi-T	Na<up>+</up>-dependent inorganic phosphate cotransporter	36651	5316 // high affinity inorganic phosphate:sodium symporter activity // inferred from sequence or structural similarity /// 5316 // high affinity inorganic phosphate:sodium symporter activity // non-traceable author statement /// 15114 // phosphate transporter activity // inferred from electronic annotation /// 5515 // protein binding // inferred from physical interaction /// 5215 // transporter a…	6796 // phosphate metabolism // inferred from electronic annotation /// 6812 // cation transport // inferred from electronic annotation /// 6817 // phosphate transport // inferred from electronic annotation /// 6858 // extracellular transport // inferred from electronic annotation /// 6810 // transport // inferred from electronic annotation /// 6814 // sodium ion transport // inferred from electr…	16021 // integral to membrane // inferred from electronic annotation /// 16020 // membrane // inferred from electronic annotation	---
1055	142254_at	-1.13767	2.39005	-10.0489	2.43e-11	8.1e-10	15.5652	FBgn0039326	CG10562	CG10562	CG10562	43066	16301 // kinase activity // inferred from electronic annotation /// 16740 // transferase activity // inferred from electronic annotation	---	---	IPR004119 // Protein of unknown function DUF227 // 2.5E-95
11537	152736_at	-1.00355	2.15672	-10.0464	2.45e-11	8.13e-10	15.5591	FBgn0039629	CG11842	CG11842	CG11842	43431	4252 // serine-type endopeptidase activity // inferred from sequence or structural similarity /// 4263 // chymotrypsin activity // inferred from electronic annotation /// 4295 // trypsin activity // non-traceable author statement /// 4252 // serine-type endopeptidase activity // inferred from electronic annotation /// 8233 // peptidase activity // inferred from electronic annotation /// 16787 // …	6508 // proteolysis // non-traceable author statement /// 6508 // proteolysis // inferred from electronic annotation	---	IPR001254 // Peptidase S1, chymotrypsin // 3.5E-49
2691	143890_at	-0.928772	1.60921	-10.0445	2.46e-11	8.15e-10	15.5545	FBgn0017448	CG2187	CG2187	CG2187	43743	8324 // cation transporter activity // inferred from electronic annotation /// 8507 // sodium:iodide symporter activity // inferred from sequence or structural similarity /// 5215 // transporter activity // inferred from electronic annotation /// 8507 // sodium:iodide symporter activity // inferred from sequence similarity	6732 // coenzyme metabolism // inferred from electronic annotation /// 6812 // cation transport // inferred from electronic annotation /// 6858 // extracellular transport // inferred from electronic annotation /// 51189 // prosthetic group metabolism // inferred from electronic annotation /// 6810 // transport // inferred from electronic annotation /// 6811 // ion transport // inferred from elect…	16020 // membrane // inferred from electronic annotation /// 16021 // integral to membrane // inferred from electronic annotation	IPR001734 // Na+/solute symporter // 1.6E-11 /// IPR001734 // Na+/solute symporter // 8.9E-6
5611	146810_at	-1.54707	2.48543	-10.0425	2.47e-11	8.17e-10	15.5497	FBgn0033297	CG8690	CG8690	CG8690	35830	4556 // alpha-amylase activity // inferred from electronic annotation /// 4558 // alpha-glucosidase activity // inferred from sequence or structural similarity /// 5215 // transporter activity // inferred from electronic annotation /// 4558 // alpha-glucosidase activity // inferred from sequence similarity	5975 // carbohydrate metabolism // inferred from electronic annotation	---	IPR006047 // Alpha amylase, catalytic domain // 2.2E-111
7007	148206_at	-1.17858	1.62137	-10.0172	2.63e-11	8.62e-10	15.4879	FBgn0035583	CG13704	CG13704	CG13704	38588	---	---	---	---
10010	151209_at	-2.17698	5.04802	-10.0178	2.62e-11	8.62e-10	15.4894	FBgn0040734	CG15065	CG15065	CG15065	50207	---	---	---	---
2576	143775_at	-1.48354	0.865695	-10.0123	2.66e-11	8.7e-10	15.4759	FBgn0015001	CG7754	Try	Trypsin	36223	4263 // chymotrypsin activity // inferred from electronic annotation /// 4295 // trypsin activity // inferred from sequence or structural similarity /// 4295 // trypsin activity // non-traceable author statement /// 4252 // serine-type endopeptidase activity // inferred from electronic annotation /// 8233 // peptidase activity // inferred from electronic annotation /// 16787 // hydrolase activity…	6508 // proteolysis // non-traceable author statement /// 6508 // proteolysis // inferred from electronic annotation	5576 // extracellular region // non-traceable author statement	IPR001254 // Peptidase S1, chymotrypsin // 3.8E-91
6858	148057_at	-0.849784	0.878356	-10.0092	2.68e-11	8.75e-10	15.4683	FBgn0035359	CG1143	CG1143	CG1143	38329	---	---	---	---
2837	144036_at	-0.650913	2.21497	-9.97266	2.93e-11	9.47e-10	15.3789	FBgn0024945	CG7067	NitFhit	Nitrilase and fragile histidine triad fusion protein	38029	257 // nitrilase activity // inferred from sequence or structural similarity /// 16810 // hydrolase activity, acting on carbon-nitrogen (but not peptide) bonds // traceable author statement /// 19204 // nucleotide phosphatase activity // inferred from electronic annotation /// 47710 // bis(5'-adenosyl)-triphosphatase activity // inferred from direct assay /// 3824 // catalytic activity // inferre…	6139 // nucleobase, nucleoside, nucleotide and nucleic acid metabolism // inferred from direct assay /// 6807 // nitrogen compound metabolism // inferred from electronic annotation	---	IPR003010 // Nitrilase/cyanide hydratase and apolipoprotein N-acyltransferase // 4.1E-65 /// IPR001310 // Histidine triad (HIT) protein // 2.4E-28
1000	142199_at	-1.1006	1.92428	-9.96975	2.95e-11	9.51e-10	15.3718	FBgn0029608	CG3091	CG3091	CG3091	31210	5386 // carrier activity // inferred from electronic annotation /// 8431 // vitamin E binding // inferred from sequence or structural similarity /// 5215 // transporter activity // inferred from electronic annotation /// 8431 // vitamin E binding // inferred from sequence similarity	6732 // coenzyme metabolism // inferred from electronic annotation /// 6810 // transport // inferred from electronic annotation /// 51189 // prosthetic group metabolism // inferred from electronic annotation	5622 // intracellular // inferred from electronic annotation	IPR001251 // Cellular retinaldehyde-binding)/triple function, C-terminal // 2.1E-14
6713	147912_at	-1.06877	2.3151	-9.9678	2.96e-11	9.53e-10	15.367	FBgn0035112	CG13877	CG13877	CG13877	38036	---	---	---	---
5018	146217_at	-0.831223	1.11728	-9.95761	3.03e-11	9.71e-10	15.342	FBgn0040096	CG16834	lectin-33A	lectin-33A	53516	5534 // galactose binding // inferred from sequence or structural similarity /// 5529 // sugar binding // inferred from electronic annotation /// 5534 // galactose binding // inferred from sequence similarity	---	---	IPR001304 // C-type lectin // 1.0E-4
9280	150479_at	-0.789867	1.02546	-9.95733	3.04e-11	9.71e-10	15.3413	FBgn0039145	CG6000	CG6000	CG6000	42851	51082 // unfolded protein binding // inferred from sequence or structural similarity /// 51082 // unfolded protein binding // inferred from sequence similarity	6457 // protein folding // inferred from sequence or structural similarity /// 6457 // protein folding // inferred from sequence similarity	---	IPR001763 // Rhodanese-like // 2.1E-17
11168	152367_at	-0.700554	0.95352	-9.91315	3.38e-11	1.07e-09	15.2329	FBgn0032881	CG9319	CG9319	CG9319	35337	8111 // alpha-methylacyl-CoA racemase activity // inferred from sequence or structural similarity /// 8111 // alpha-methylacyl-CoA racemase activity // inferred from sequence similarity	6631 // fatty acid metabolism // inferred from electronic annotation /// 8152 // metabolism // inferred from electronic annotation	---	IPR003673 // L-carnitine dehydratase/bile acid-inducible protein F // 3.0E-80
9421	150620_at	-0.578188	0.957926	-9.90897	3.41e-11	1.07e-09	15.2226	FBgn0039378	CG5878	4GT2	4GT2	43124	8378 // galactosyltransferase activity // inferred from electronic annotation /// 16740 // transferase activity // inferred from electronic annotation /// 16757 // transferase activity, transferring glycosyl groups // inferred from electronic annotation	5975 // carbohydrate metabolism // inferred from electronic annotation /// 6629 // lipid metabolism // inferred from electronic annotation	5795 // Golgi stack // inferred from electronic annotation	---
8831	150030_at	-1.36079	1.50163	-9.89626	3.52e-11	1.11e-09	15.1914	FBgn0038449	CG17562	CG17562	CG17562	42021	16491 // oxidoreductase activity // inferred from electronic annotation	---	---	IPR004262 // Male sterility protein // 4.0E-117
2819	144018_at	-0.778924	0.762402	-9.88853	3.59e-11	1.12e-09	15.1724	FBgn0024361	CG11415	Tsp2A	Tetraspanin 2A	31080	---	---	16021 // integral to membrane // inferred from sequence or structural similarity /// 16021 // integral to membrane // inferred from electronic annotation /// 16021 // integral to membrane // inferred from sequence similarity	IPR000301 // CD9/CD37/CD63 antigen // 1.2E-47
2952	144151_at	-1.09354	2.82446	-9.86848	3.77e-11	1.17e-09	15.123	FBgn0026630	CG9655	nes	nessy	40093	---	---	5886 // plasma membrane // non-traceable author statement	IPR004299 // Membrane bound O-acyl transferase, MBOAT // 1.0E-84
12589	153788_at	-0.609573	1.47634	-9.8558	3.88e-11	1.21e-09	15.0918	FBgn0031868	CG10354	CG10354	CG10354	33964	3676 // nucleic acid binding // inferred from electronic annotation /// 4534 // 5'-3' exoribonuclease activity // inferred from sequence or structural similarity /// 4527 // exonuclease activity // inferred from electronic annotation /// 4534 // 5'-3' exoribonuclease activity // inferred from sequence similarity	6139 // nucleobase, nucleoside, nucleotide and nucleic acid metabolism // inferred from electronic annotation /// 6259 // DNA metabolism // inferred from electronic annotation	5634 // nucleus // inferred from electronic annotation	IPR004859 // Putative 5-3 exonuclease domain // 1.0E-126
11701	152900_at	-1.028	4.2389	-9.84997	3.94e-11	1.22e-09	15.0774	FBgn0025454	CG8453	Cyp6g1	Cyp6g1	36316	4497 // monooxygenase activity // inferred from electronic annotation /// 16491 // oxidoreductase activity // inferred from electronic annotation /// 5506 // iron ion binding // inferred from electronic annotation /// 20037 // heme binding // inferred from electronic annotation /// 46872 // metal ion binding // inferred from electronic annotation	6118 // electron transport // inferred from electronic annotation /// 17085 // response to insecticide // inferred from mutant phenotype /// 46680 // response to DDT // inferred from mutant phenotype /// 46683 // response to organophosphorus // inferred from mutant phenotype	5792 // microsome // non-traceable author statement /// 16020 // membrane // non-traceable author statement /// 16020 // membrane // inferred from electronic annotation /// 5783 // endoplasmic reticulum // inferred from electronic annotation /// 5792 // microsome // inferred from electronic annotation /// 5789 // endoplasmic reticulum membrane // non-traceable author statement	IPR001128 // Cytochrome P450 // 4.6E-87 /// IPR001128 // Cytochrome P450 // 1.4E-77
1752	142951_at	-2.08028	2.99316	-9.82682	4.17e-11	1.29e-09	15.0203	FBgn0028534	CG7916	CG7916	CG7916	34800	5515 // protein binding // inferred from physical interaction	---	---	---
1183	142382_at	-0.930606	-0.274554	-9.8222	4.22e-11	1.3e-09	15.0089	FBgn0026577	CG8677	CG8677	CG8677	35397	3677 // DNA binding // inferred from electronic annotation /// 5515 // protein binding // inferred from electronic annotation /// 8270 // zinc ion binding // inferred from electronic annotation	6355 // regulation of transcription, DNA-dependent // inferred from electronic annotation	---	IPR001965 // Zn-finger-like, PHD finger // 2.2E-12
13340	154539_at	-1.39271	4.06224	-9.81461	4.29e-11	1.31e-09	14.9902	FBgn0037671	CG8444	CG8444	CG8444	41104	4872 // receptor activity // inferred from electronic annotation	---	16021 // integral to membrane // inferred from electronic annotation	---
13074	154273_at	-0.712334	2.08677	-9.80956	4.35e-11	1.32e-09	14.9777	FBgn0004362	CG17950	HmgD	High mobility group protein D	37481	3680 // AT DNA binding // inferred from direct assay /// 8301 // DNA bending activity // inferred from direct assay /// 8301 // DNA bending activity // non-traceable author statement /// 5515 // protein binding // inferred from physical interaction /// 3677 // DNA binding // inferred from electronic annotation	6325 // establishment and/or maintenance of chromatin architecture // inferred from direct assay /// 6355 // regulation of transcription, DNA-dependent // inferred from electronic annotation	790 // nuclear chromatin // inferred from direct assay /// 5634 // nucleus // inferred from electronic annotation /// 5694 // chromosome // inferred from electronic annotation	IPR000910 // HMG1/2 (high mobility group) box // 1.2E-28
93	141292_at	-0.716229	1.39306	-9.80621	4.38e-11	1.33e-09	14.9694	FBgn0037370	CG1236	CG1236	CG1236	40708	4617 // phosphoglycerate dehydrogenase activity // inferred from sequence or structural similarity /// 16616 // oxidoreductase activity, acting on the CH-OH group of donors, NAD or NADP as acceptor // inferred from electronic annotation /// 51287 // NAD binding // inferred from electronic annotation /// 4617 // phosphoglycerate dehydrogenase activity // inferred from sequence similarity	5975 // carbohydrate metabolism // inferred from electronic annotation /// 6564 // L-serine biosynthesis // inferred from electronic annotation /// 8652 // amino acid biosynthesis // inferred from electronic annotation /// 8152 // metabolism // inferred from electronic annotation	---	IPR006140 // D-isomer specific 2-hydroxyacid dehydrogenase, NAD binding domain // 8.2E-77 /// IPR006139 // D-isomer specific 2-hydroxyacid dehydrogenase, catalytic domain // 6.2E-22
6680	147879_at	-0.697972	0.592188	-9.80245	4.42e-11	1.34e-09	14.9601	FBgn0035043	CG4781	CG4781	CG4781	37943	---	---	---	IPR001611 // Leucine-rich repeat // 0.0038 /// IPR001611 // Leucine-rich repeat // 2.4E-4 /// IPR001611 // Leucine-rich repeat // 0.011 /// IPR001611 // Leucine-rich repeat // 0.24 /// IPR001611 // Leucine-rich repeat // 0.15
1168	142367_at	-0.962217	1.24806	-9.79988	4.45e-11	1.34e-09	14.9538	FBgn0038211	CG9649	CG9649	CG9649	41727	4263 // chymotrypsin activity // inferred from electronic annotation /// 4275 // enteropeptidase activity // inferred from sequence or structural similarity /// 4295 // trypsin activity // inferred from electronic annotation /// 42708 // elastase activity // non-traceable author statement /// 4252 // serine-type endopeptidase activity // inferred from electronic annotation /// 4275 // enteropepti…	6508 // proteolysis // non-traceable author statement /// 6952 // defense response // inferred from electronic annotation /// 6508 // proteolysis // inferred from electronic annotation	---	IPR001254 // Peptidase S1, chymotrypsin // 9.1E-39
8520	149719_at	-0.862885	2.26492	-9.78894	4.57e-11	1.37e-09	14.9267	FBgn0037969	CG18347	CG18347	CG18347	41448	5386 // carrier activity // inferred from sequence or structural similarity /// 5488 // binding // inferred from electronic annotation /// 5215 // transporter activity // inferred from electronic annotation /// 5386 // carrier activity // inferred from sequence similarity	6629 // lipid metabolism // inferred from electronic annotation /// 6869 // lipid transport // inferred from electronic annotation /// 6810 // transport // inferred from electronic annotation	5740 // mitochondrial envelope // inferred from sequence or structural similarity /// 5743 // mitochondrial inner membrane // inferred from electronic annotation /// 16020 // membrane // inferred from electronic annotation /// 16021 // integral to membrane // inferred from electronic annotation /// 5740 // mitochondrial envelope // inferred from sequence similarity	IPR001993 // Mitochondrial substrate carrier // 1.3E-32 /// IPR001993 // Mitochondrial substrate carrier // 5.7E-20 /// IPR001993 // Mitochondrial substrate carrier // 2.0E-26
13207	154406_at	-1.0113	4.01115	-9.78738	4.59e-11	1.38e-09	14.9229	FBgn0033356	CG8229	CG8229	CG8229	35898	---	---	---	---
4312	145511_at	-1.21176	4.73068	-9.77981	4.68e-11	1.4e-09	14.9041	FBgn0025683	CG3164	CG3164	CG3164	33171	166 // nucleotide binding // inferred from electronic annotation /// 5215 // transporter activity // inferred from sequence or structural similarity /// 5524 // ATP binding // inferred from electronic annotation /// 42626 // ATPase activity, coupled to transmembrane movement of substances // inferred from sequence or structural similarity /// 16887 // ATPase activity // inferred from electronic a…	6629 // lipid metabolism // inferred from electronic annotation /// 6869 // lipid transport // inferred from electronic annotation	43190 // ATP-binding cassette (ABC) transporter complex // inferred from sequence or structural similarity /// 43190 // ATP-binding cassette (ABC) transporter complex // inferred from sequence similarity	IPR003439 // ABC transporter // 3.1E-37 /// IPR003439 // ABC transporter // 1.4E-18 /// IPR003439 // ABC transporter // 3.1E-37
8643	149842_at	-0.771132	1.48781	-9.74746	5.06e-11	1.51e-09	14.824	FBgn0041711	CG9792	yellow-e	yellow-e	41653	---	---	---	IPR003534 // Major royal jelly protein // 5.3E-126
10312	151511_r_at	-1.00656	2.8947	-9.74425	5.1e-11	1.52e-09	14.8161	FBgn0020306	CG9696	dom	domino	45655	3676 // nucleic acid binding // inferred from electronic annotation /// 3677 // DNA binding // inferred from electronic annotation /// 3678 // DNA helicase activity // inferred from electronic annotation /// 3910 // DNA ligase (ATP) activity // inferred from electronic annotation /// 3918 // DNA topoisomerase (ATP-hydrolyzing) activity // inferred from electronic annotation /// 4386 // helicase a…	381 // regulation of alternative nuclear mRNA splicing, via spliceosome // inferred from mutant phenotype /// 2165 // larval or pupal development (sensu Insecta) // inferred from mutant phenotype /// 6260 // DNA replication // inferred from electronic annotation /// 6265 // DNA topological change // inferred from electronic annotation /// 6281 // DNA repair // inferred from electronic annotation …	5634 // nucleus // Unknown /// 5634 // nucleus // inferred from direct assay /// 16585 // chromatin remodeling complex // inferred from sequence or structural similarity /// 5634 // nucleus // inferred from curator /// 16585 // chromatin remodeling complex // inferred from sequence similarity	IPR000330 // SNF2 related domain // 3.7E-104 /// IPR001650 // Helicase, C-terminal // 9.1E-28
11602	152801_at	-1.62609	4.52015	-9.73076	5.27e-11	1.57e-09	14.7826	FBgn0001125	CG4233	Got2	Glutamate oxaloacetate transaminase 2	33373	4069 // aspartate transaminase activity // inferred from direct assay /// 4069 // aspartate transaminase activity // inferred from sequence or structural similarity /// 4069 // aspartate transaminase activity // non-traceable author statement /// 3824 // catalytic activity // inferred from electronic annotation /// 8483 // transaminase activity // inferred from electronic annotation /// 16769 // …	6531 // aspartate metabolism // inferred from sequence or structural similarity /// 6537 // glutamate biosynthesis // inferred from mutant phenotype /// 6537 // glutamate biosynthesis // traceable author statement /// 7416 // synaptogenesis // inferred from mutant phenotype /// 45213 // neurotransmitter receptor metabolism // inferred from mutant phenotype /// 6520 // amino acid metabolism // inf…	5739 // mitochondrion // inferred from sequence or structural similarity /// 5759 // mitochondrial matrix // inferred from sequence or structural similarity /// 5739 // mitochondrion // inferred from sequence similarity /// 5759 // mitochondrial matrix // inferred from sequence similarity	IPR004839 // Aminotransferase, class I and II // 2.4E-95 /// IPR004839 // Aminotransferase, class I and II // 2.4E-95
12639	153838_at	-0.646829	0.538559	-9.71838	5.43e-11	1.61e-09	14.7519	FBgn0032908	CG9270	CG9270	CG9270	35366	166 // nucleotide binding // inferred from electronic annotation /// 5215 // transporter activity // inferred from sequence or structural similarity /// 5524 // ATP binding // inferred from electronic annotation /// 8559 // xenobiotic-transporting ATPase activity // inferred from sequence or structural similarity /// 42626 // ATPase activity, coupled to transmembrane movement of substances // inf…	6858 // extracellular transport // inferred from electronic annotation /// 6952 // defense response // inferred from electronic annotation /// 9636 // response to toxin // inferred from electronic annotation /// 6810 // transport // inferred from electronic annotation	16021 // integral to membrane // inferred from electronic annotation /// 43190 // ATP-binding cassette (ABC) transporter complex // inferred from sequence or structural similarity /// 16020 // membrane // inferred from electronic annotation /// 43190 // ATP-binding cassette (ABC) transporter complex // inferred from sequence similarity	IPR001140 // ABC transporter, transmembrane region // 4.8E-15 /// IPR001140 // ABC transporter, transmembrane region // 3.0E-19 /// IPR003439 // ABC transporter // 2.4E-45 /// IPR003439 // ABC transporter // 1.8E-48 /// IPR001140 // ABC transporter, transmembrane region // 1.5E-15 /// IPR001140 // ABC transporter, transmembrane region // 3.0E-19 /// IPR003439 // ABC transporter // 2.4E-45 /// IPR…
420	141619_at	-0.967969	4.4462	-9.69765	5.72e-11	1.68e-09	14.7004	FBgn0021953	CG7400	Fatp	Fatty acid (long chain) transport protein	44227	3824 // catalytic activity // inferred from electronic annotation /// 5324 // long-chain fatty acid transporter activity // inferred from sequence or structural similarity /// 5324 // long-chain fatty acid transporter activity // inferred from sequence similarity	6631 // fatty acid metabolism // inferred from electronic annotation /// 15909 // long-chain fatty acid transport // inferred from sequence or structural similarity /// 8152 // metabolism // inferred from electronic annotation /// 15909 // long-chain fatty acid transport // inferred from sequence similarity	5886 // plasma membrane // inferred from sequence or structural similarity /// 5886 // plasma membrane // inferred from sequence similarity	IPR000873 // AMP-dependent synthetase and ligase // 9.3E-87
2448	143647_at	-1.16892	1.57812	-9.69753	5.72e-11	1.68e-09	14.7001	FBgn0011281	CG11421	Pbprp3	Pheromone-binding protein-related protein 3	40737	5102 // receptor binding // inferred from electronic annotation /// 5550 // pheromone binding // inferred from sequence or structural similarity /// 5550 // pheromone binding // non-traceable author statement /// 8145 // phenylalkylamine binding // non-traceable author statement /// 5549 // odorant binding // inferred from electronic annotation /// 5550 // pheromone binding // inferred from elect…	6810 // transport // inferred from electronic annotation /// 7165 // signal transduction // inferred from electronic annotation /// 7600 // sensory perception // inferred from electronic annotation /// 19236 // response to pheromone // inferred from electronic annotation	5576 // extracellular region // non-traceable author statement	IPR006170 // Pheromone/general odorant binding protein, PBP/GOBP // 2.9E-36
11263	152462_at	-0.863121	1.6051	-9.69186	5.8e-11	1.7e-09	14.686	FBgn0031865	CG10806	CG10806	CG10806	33961	15299 // solute:hydrogen antiporter activity // inferred from electronic annotation /// 15385 // sodium:hydrogen antiporter activity // inferred from sequence or structural similarity /// 15385 // sodium:hydrogen antiporter activity // inferred from sequence similarity	6885 // regulation of pH // inferred from electronic annotation /// 6810 // transport // inferred from electronic annotation	16021 // integral to membrane // inferred from electronic annotation	IPR006153 // Sodium/hydrogen exchanger // 2.1E-13 /// IPR006153 // Sodium/hydrogen exchanger // 2.1E-13
1196	142395_at	-1.31565	2.64996	-9.68904	5.84e-11	1.71e-09	14.679	FBgn0028543	CG31839	CG31839	CG31839	260645	5102 // receptor binding // inferred from electronic annotation /// 5198 // structural molecule activity // inferred from electronic annotation	7160 // cell-matrix adhesion // inferred from electronic annotation /// 7165 // signal transduction // inferred from electronic annotation /// 7498 // mesoderm development // inferred from expression pattern	5576 // extracellular region // inferred from sequence or structural similarity /// 5576 // extracellular region // inferred from sequence similarity	---
5250	146449_at	-0.781721	1.42504	-9.67921	5.98e-11	1.75e-09	14.6545	FBgn0032706	CG10369	Irk3	Inwardly rectifying potassium channel 3	35131	5242 // inward rectifier potassium channel activity // inferred from sequence or structural similarity /// 5242 // inward rectifier potassium channel activity // non-traceable author statement /// 5216 // ion channel activity // inferred from electronic annotation /// 5242 // inward rectifier potassium channel activity // inferred from electronic annotation /// 5242 // inward rectifier potassium …	6812 // cation transport // inferred from electronic annotation /// 6813 // potassium ion transport // inferred from electronic annotation	16020 // membrane // inferred from electronic annotation	IPR001838 // K+ channel, inward rectifier // 4.1E-83
125	141324_at	-1.08336	1.35647	-9.65251	6.39e-11	1.86e-09	14.588	FBgn0031910	CG15818	CG15818	CG15818	34019	5529 // sugar binding // inferred from electronic annotation	7275 // development // inferred from electronic annotation /// 7276 // gametogenesis // inferred from electronic annotation /// 7283 // spermatogenesis // inferred from electronic annotation	---	IPR001304 // C-type lectin // 4.6E-12
2869	144068_at	-1.92545	4.0017	-9.64267	6.54e-11	1.9e-09	14.5635	FBgn0025583	CG18106	IM2	Immune induced molecule 2	49802	---	6952 // defense response // inferred from direct assay /// 6952 // defense response // non-traceable author statement /// 6955 // immune response // inferred from electronic annotation /// 45087 // innate immune response // inferred from electronic annotation	5576 // extracellular region // inferred from direct assay /// 5576 // extracellular region // non-traceable author statement	---
11502	152701_at	-1.28111	2.16461	-9.64022	6.58e-11	1.91e-09	14.5574	FBgn0038865	CG10824	CG10824	CG10824	42512	4190 // aspartic-type endopeptidase activity // inferred from electronic annotation /// 4872 // receptor activity // inferred from electronic annotation	6508 // proteolysis // inferred from electronic annotation /// 6952 // defense response // inferred from electronic annotation /// 7155 // cell adhesion // inferred from electronic annotation /// 7165 // signal transduction // inferred from electronic annotation /// 7166 // cell surface receptor linked signal transduction // inferred from electronic annotation /// 19226 // transmission of nerve i…	---	IPR001611 // Leucine-rich repeat // 0.17 /// IPR001611 // Leucine-rich repeat // 0.0061 /// IPR001611 // Leucine-rich repeat // 0.0016 /// IPR001611 // Leucine-rich repeat // 0.0099 /// IPR001611 // Leucine-rich repeat // 0.071 /// IPR001611 // Leucine-rich repeat // 0.023 /// IPR001611 // Leucine-rich repeat // 1.2E-6
4335	145534_at	-1.41082	1.69123	-9.63766	6.63e-11	1.92e-09	14.551	FBgn0043364	CG4427	cbt	cabut	33224	3676 // nucleic acid binding // inferred from electronic annotation /// 8270 // zinc ion binding // inferred from electronic annotation /// 16563 // transcriptional activator activity // inferred from sequence or structural similarity /// 46872 // metal ion binding // inferred from electronic annotation /// 16563 // transcriptional activator activity // inferred from sequence similarity	1736 // establishment of planar polarity // non-traceable author statement /// 6357 // regulation of transcription from RNA polymerase II promoter // inferred from electronic annotation /// 7254 // JNK cascade // non-traceable author statement /// 7390 // germ-band shortening // non-traceable author statement /// 7391 // dorsal closure // non-traceable author statement /// 7423 // sensory organ d…	5634 // nucleus // inferred from electronic annotation	IPR007087 // Zn-finger, C2H2 type // 1.7E-6 /// IPR007087 // Zn-finger, C2H2 type // 1.9E-7 /// IPR007087 // Zn-finger, C2H2 type // 3.2E-5 /// IPR007087 // Zn-finger, C2H2 type // 1.7E-6 /// IPR007087 // Zn-finger, C2H2 type // 1.9E-7 /// IPR007087 // Zn-finger, C2H2 type // 3.2E-5
6381	147580_at	-0.655778	0.263414	-9.60172	7.24e-11	2.08e-09	14.4613	FBgn0050295	CG30295	Ipk1	Ipk1	37360	35299 // inositol pentakisphosphate 2-kinase activity // inferred from mutant phenotype /// 166 // nucleotide binding // inferred from electronic annotation /// 5524 // ATP binding // inferred from electronic annotation /// 16301 // kinase activity // inferred from electronic annotation /// 16740 // transferase activity // inferred from electronic annotation	46853 // inositol and derivative phosphorylation // inferred from mutant phenotype	5634 // nucleus // inferred from electronic annotation	IPR009286 // Protein of unknown function DUF941 // 1.0E-126
10146	151345_at	-0.69167	0.436826	-9.59659	7.33e-11	2.1e-09	14.4485	---	---	---	---	---	---	---	---	---
2199	143398_at	-1.07401	6.05344	-9.5887	7.48e-11	2.14e-09	14.4288	FBgn0003942	CG5271	RpS27A	Ribosomal protein S27A	34420	3676 // nucleic acid binding // inferred from electronic annotation /// 3735 // structural constituent of ribosome // inferred from sequence or structural similarity /// 3735 // structural constituent of ribosome // non-traceable author statement /// 5515 // protein binding // inferred from sequence or structural similarity /// 5515 // protein binding // inferred from physical interaction /// 373…	6325 // establishment and/or maintenance of chromatin architecture // non-traceable author statement /// 6355 // regulation of transcription, DNA-dependent // non-traceable author statement /// 6412 // protein biosynthesis // inferred from sequence or structural similarity /// 6464 // protein modification // inferred from sequence or structural similarity /// 6510 // ATP-dependent proteolysis // …	5634 // nucleus // non-traceable author statement /// 5737 // cytoplasm // non-traceable author statement /// 5840 // ribosome // non-traceable author statement /// 5843 // cytosolic small ribosomal subunit (sensu Eukaryota) // inferred from sequence or structural similarity /// 5622 // intracellular // inferred from electronic annotation /// 5840 // ribosome // inferred from electronic annotatio…	IPR002906 // Ribosomal protein S27a // 1.8E-31 /// IPR000626 // Ubiquitin // 3.8E-43
5454	146653_at	-0.557305	1.25254	-9.57668	7.7e-11	2.2e-09	14.3988	FBgn0022288 /// FBgn0067958	CG12792	l(2)09851 /// Dyakl(2)09851	lethal (2) 09851 /// lethal (2) 09851	46662	---	---	---	IPR001680 // G-protein beta WD-40 repeat // 3.6E-5 /// IPR001680 // G-protein beta WD-40 repeat // 1.2E-11 /// IPR001680 // G-protein beta WD-40 repeat // 6.5E-9 /// IPR001680 // G-protein beta WD-40 repeat // 6.1E-10
2957	144156_at	-1.17947	3.52792	-9.55869	8.05e-11	2.29e-09	14.3537	FBgn0026753	CG6213	Vha13	Vacuolar H<up>+</up> ATPase G-subunit	42341	8553 // hydrogen-exporting ATPase activity, phosphorylative mechanism // inferred from sequence or structural similarity /// 8553 // hydrogen-exporting ATPase activity, phosphorylative mechanism // non-traceable author statement /// 5515 // protein binding // inferred from physical interaction /// 15078 // hydrogen ion transporter activity // inferred from electronic annotation /// 16787 // hydro…	1700 // embryonic development (sensu Insecta) // inferred from mutant phenotype /// 15992 // proton transport // inferred from sequence or structural similarity /// 6754 // ATP biosynthesis // inferred from electronic annotation /// 6810 // transport // inferred from electronic annotation /// 6811 // ion transport // inferred from electronic annotation /// 15992 // proton transport // inferred fr…	221 // hydrogen-transporting ATPase V1 domain // inferred from sequence or structural similarity /// 221 // hydrogen-transporting ATPase V1 domain // non-traceable author statement /// 221 // hydrogen-transporting ATPase V1 domain // inferred from sequence similarity	IPR005124 // Vacuolar (H+)-ATPase G subunit // 1.2E-55
10923	152122_at	-1.88032	2.89166	-9.55784	8.07e-11	2.29e-09	14.3516	FBgn0034296	CG10912	CG10912	CG10912	37059	---	---	---	IPR007931 // Protein of unknown function DUF725 // 1.3E-71
486	141685_at	-0.852972	1.44823	-9.5272	8.7e-11	2.46e-09	14.2748	FBgn0037515	CG3066	CG3066	CG3066	40918	4185 // serine carboxypeptidase activity // non-traceable author statement /// 4263 // chymotrypsin activity // inferred from electronic annotation /// 4295 // trypsin activity // non-traceable author statement /// 8439 // monophenol monooxygenase activator activity // inferred from sequence or structural similarity /// 4252 // serine-type endopeptidase activity // inferred from electronic annota…	6508 // proteolysis // non-traceable author statement /// 6952 // defense response // non-traceable author statement /// 6508 // proteolysis // inferred from electronic annotation	---	IPR001254 // Peptidase S1, chymotrypsin // 1.1E-67 /// IPR001254 // Peptidase S1, chymotrypsin // 2.8E-61
204	141403_at	-0.840408	1.62415	-9.52549	8.74e-11	2.46e-09	14.2706	FBgn0030748 /// FBgn0068013	CG4394	Traf3 /// DyakTraf3	Traf3 /// Traf3	32611	5515 // protein binding // inferred from physical interaction	6952 // defense response // inferred from sequence or structural similarity /// 7165 // signal transduction // inferred from sequence or structural similarity /// 6952 // defense response // inferred from sequence similarity /// 7165 // signal transduction // inferred from sequence similarity	---	IPR002083 // MATH // 3.9E-11 /// IPR002083 // MATH // 3.9E-11 /// IPR002083 // MATH // 3.9E-11
2943	144142_at	-0.902618	2.90445	-9.49206	9.5e-11	2.66e-09	14.1866	---	CG33790 /// CG1220	---	---	---	4867 // serine-type endopeptidase inhibitor activity // non-traceable author statement /// 8233 // peptidase activity // inferred from electronic annotation	30162 // regulation of proteolysis // non-traceable author statement	---	---
13760	154959_at	-0.55706	1.41155	-9.48374	9.69e-11	2.71e-09	14.1657	FBgn0039182	CG5728	CG5728	CG5728	42899	3729 // mRNA binding // inferred from sequence or structural similarity /// 3676 // nucleic acid binding // inferred from electronic annotation /// 3723 // RNA binding // inferred from electronic annotation /// 5488 // binding // inferred from electronic annotation /// 3729 // mRNA binding // inferred from sequence similarity	381 // regulation of alternative nuclear mRNA splicing, via spliceosome // inferred from mutant phenotype /// 6364 // rRNA processing // inferred from sequence or structural similarity /// 6364 // rRNA processing // inferred from sequence similarity	5634 // nucleus // Unknown /// 5730 // nucleolus // inferred from sequence or structural similarity /// 5634 // nucleus // inferred from curator /// 5730 // nucleolus // inferred from sequence similarity	IPR003029 // RNA binding S1 // 0.082 /// IPR003029 // RNA binding S1 // 5.3E-5
1059	142258_at	-1.10748	1.60516	-9.46838	1.01e-10	2.8e-09	14.1271	FBgn0035476	CG12766	CG12766	CG12766	38462	4032 // aldehyde reductase activity // inferred from sequence or structural similarity /// 4032 // aldehyde reductase activity // inferred from sequence similarity	---	---	IPR001395 // Aldo/keto reductase // 1.0E-126
11226	152425_at	-1.20038	3.04706	-9.45681	1.04e-10	2.88e-09	14.098	FBgn0033079	CG3174	Fmo-2	Flavin-containing monooxygenase 2	35561	4497 // monooxygenase activity // inferred from direct assay /// 4499 // dimethylaniline monooxygenase (N-oxide-forming) activity // inferred from sequence or structural similarity /// 4499 // dimethylaniline monooxygenase (N-oxide-forming) activity // non-traceable author statement /// 15036 // disulfide oxidoreductase activity // inferred from electronic annotation /// 5515 // protein binding /…	6118 // electron transport // inferred from electronic annotation /// 6520 // amino acid metabolism // inferred from electronic annotation	5739 // mitochondrion // inferred from direct assay /// 5792 // microsome // inferred from direct assay /// 5829 // cytosol // inferred from direct assay	IPR000960 // Flavin-containing monooxygenase FMO // 6.1E-34
2867	144066_at	-0.651008	-0.0275706	-9.45502	1.04e-10	2.88e-09	14.0935	FBgn0025519	CG7773	fidipidine	fidipidine	36808	---	---	---	---
8595	149794_at	-1.24505	4.21484	-9.44289	1.07e-10	2.96e-09	14.063	FBgn0038074	CG6188	CG6188	CG6188	41561	17174 // glycine N-methyltransferase activity // inferred from sequence or structural similarity /// 8168 // methyltransferase activity // inferred from electronic annotation /// 8757 // S-adenosylmethionine-dependent methyltransferase activity // inferred from electronic annotation /// 16740 // transferase activity // inferred from electronic annotation /// 17174 // glycine N-methyltransferase a…	8652 // amino acid biosynthesis // inferred from electronic annotation	---	---
4691	145890_at	-1.32971	2.18474	-9.41794	1.14e-10	3.14e-09	14.0001	FBgn0031801	CG9498	CG9498	CG9498	33885	16301 // kinase activity // inferred from electronic annotation /// 16740 // transferase activity // inferred from electronic annotation	---	---	IPR004119 // Protein of unknown function DUF227 // 5.8E-109
10486	151685_r_at	-0.817022	2.2295	-9.41623	1.15e-10	3.14e-09	13.9958	FBgn0052813	CG32813	CG32813	CG32813	31089	---	---	---	---
2447	143646_at	-0.862964	2.14852	-9.38342	1.24e-10	3.39e-09	13.9129	FBgn0011279	CG10436	Pbprp1	Pheromone-binding protein-related protein 1	39411	5102 // receptor binding // inferred from electronic annotation /// 5550 // pheromone binding // inferred from sequence or structural similarity /// 5550 // pheromone binding // non-traceable author statement /// 8145 // phenylalkylamine binding // inferred from sequence or structural similarity /// 8145 // phenylalkylamine binding // non-traceable author statement /// 5549 // odorant binding // …	6810 // transport // inferred from electronic annotation /// 7165 // signal transduction // inferred from electronic annotation /// 7600 // sensory perception // inferred from electronic annotation /// 19236 // response to pheromone // inferred from electronic annotation	5576 // extracellular region // non-traceable author statement	IPR006170 // Pheromone/general odorant binding protein, PBP/GOBP // 4.1E-31
1121	142320_at	-0.795952	0.0551049	-9.36959	1.29e-10	3.5e-09	13.878	FBgn0026268	CG1386	antdh	antdh	32058	4090 // carbonyl reductase (NADPH) activity // inferred from sequence or structural similarity /// 16491 // oxidoreductase activity // inferred from electronic annotation /// 4090 // carbonyl reductase (NADPH) activity // inferred from sequence similarity	8152 // metabolism // inferred from electronic annotation	---	IPR002198 // Short-chain dehydrogenase/reductase SDR // 6.3E-42 /// IPR002198 // Short-chain dehydrogenase/reductase SDR // 1.6E-39
12946	154145_at	-0.854962	3.45085	-9.36735	1.3e-10	3.51e-09	13.8723	FBgn0000117	CG11579	arm	armadillo	31151	5102 // receptor binding // inferred from electronic annotation /// 5200 // structural constituent of cytoskeleton // inferred from electronic annotation /// 5515 // protein binding // inferred from physical interaction /// 8092 // cytoskeletal protein binding // inferred from sequence or structural similarity /// 45294 // alpha-catenin binding // non-traceable author statement /// 5198 // struct…	1745 // compound eye morphogenesis (sensu Endopterygota) // inferred from mutant phenotype /// 7016 // cytoskeletal anchoring // inferred from sequence or structural similarity /// 7155 // cell adhesion // inferred from mutant phenotype /// 7163 // establishment and/or maintenance of cell polarity // non-traceable author statement /// 7391 // dorsal closure // inferred from mutant phenotype /// 7…	5737 // cytoplasm // non-traceable author statement /// 5737 // cytoplasm // traceable author statement /// 5912 // adherens junction // inferred from direct assay /// 5912 // adherens junction // non-traceable author statement /// 5912 // adherens junction // traceable author statement /// 5914 // spot adherens junction // non-traceable author statement /// 5915 // zonula adherens // inferred fr…	IPR000225 // Armadillo // 5.1E-9 /// IPR000225 // Armadillo // 4.3E-11 /// IPR000225 // Armadillo // 1.2E-7 /// IPR000225 // Armadillo // 1.6E-9
13757	154956_at	-0.719665	1.48722	-9.34972	1.35e-10	3.63e-09	13.8277	FBgn0039073	CG4408	CG4408	CG4408	42762	4181 // metallocarboxypeptidase activity // inferred from sequence or structural similarity /// 4182 // carboxypeptidase A activity // inferred from electronic annotation /// 4181 // metallocarboxypeptidase activity // inferred from sequence similarity	6508 // proteolysis // inferred from electronic annotation	---	IPR000834 // Peptidase M14, carboxypeptidase A // 1.8E-68
6677	147876_at	-0.760701	0.224012	-9.34865	1.36e-10	3.64e-09	13.825	FBgn0035040	CG4741	CG4741	CG4741	37939	---	---	---	---
5609	146808_at	-0.955335	1.54836	-9.33068	1.42e-10	3.8e-09	13.7795	FBgn0033294	CG8693	CG8693	CG8693	35827	4556 // alpha-amylase activity // inferred from electronic annotation /// 4558 // alpha-glucosidase activity // inferred from sequence or structural similarity /// 5215 // transporter activity // inferred from electronic annotation /// 4558 // alpha-glucosidase activity // inferred from sequence similarity	5975 // carbohydrate metabolism // inferred from electronic annotation	---	IPR006047 // Alpha amylase, catalytic domain // 3.4E-123
11977	153176_at	-0.605199	1.17155	-9.32924	1.42e-10	3.8e-09	13.7759	FBgn0031231	CG11488	mRpL10	mitochondrial ribosomal protein L10	33182	3735 // structural constituent of ribosome // inferred from sequence or structural similarity /// 3735 // structural constituent of ribosome // inferred from sequence similarity	6412 // protein biosynthesis // inferred from sequence or structural similarity /// 6412 // protein biosynthesis // inferred from sequence similarity	5762 // mitochondrial large ribosomal subunit // inferred from sequence or structural similarity /// 5762 // mitochondrial large ribosomal subunit // inferred from sequence similarity	---
6576	147775_at	-0.60187	2.53297	-9.32108	1.45e-10	3.87e-09	13.7552	FBgn0034860	CG9812	CG9812	CG9812	37709	---	---	---	---
6855	148054_at	-1.00989	1.8545	-9.31701	1.47e-10	3.89e-09	13.7449	FBgn0035355	CG16985	CG16985	CG16985	38323	5515 // protein binding // inferred from physical interaction /// 3824 // catalytic activity // inferred from electronic annotation	---	---	IPR006683 // Thioesterase superfamily // 5.9E-18
8832	150031_at	-1.28614	2.76237	-9.31765	1.47e-10	3.89e-09	13.7465	FBgn0038450	CG17560	CG17560	CG17560	42022	16491 // oxidoreductase activity // inferred from electronic annotation	---	---	IPR004262 // Male sterility protein // 4.2E-115
6974	148173_at	-0.740113	2.11117	-9.31132	1.49e-10	3.94e-09	13.7304	FBgn0035541	CG15019	CG15019	CG15019	38542	---	---	---	---
347	141546_at	-0.778172	1.1611	-9.28202	1.6e-10	4.21e-09	13.6561	FBgn0037250	CG1074	CG1074	CG1074	40564	3677 // DNA binding // inferred from electronic annotation /// 8170 // N-methyltransferase activity // inferred from electronic annotation	6306 // DNA methylation // inferred from electronic annotation	---	---
12648	153847_at	-0.611508	2.92158	-9.27114	1.65e-10	4.31e-09	13.6284	FBgn0052446	CG32446	CG32446	CG32446	326216	5215 // transporter activity // inferred from electronic annotation /// 8324 // cation transporter activity // inferred from electronic annotation /// 46872 // metal ion binding // inferred from electronic annotation	6800 // oxygen and reactive oxygen species metabolism // inferred from electronic annotation /// 6810 // transport // inferred from electronic annotation /// 6811 // ion transport // inferred from electronic annotation /// 6812 // cation transport // inferred from electronic annotation /// 6952 // defense response // inferred from electronic annotation /// 30001 // metal ion transport // inferred…	---	IPR006121 // Heavy metal transport/detoxification protein // 1.4E-8
513	141712_at	-0.646581	1.52514	-9.2601	1.69e-10	4.4e-09	13.6004	FBgn0039774 /// FBgn0068523	CG1471	CDase /// DyakCDase	Ceramidase /// CDase	43618	16298 // lipase activity // inferred from electronic annotation /// 17040 // ceramidase activity // inferred from direct assay /// 17040 // ceramidase activity // non-traceable author statement	6629 // lipid metabolism // inferred from electronic annotation	---	IPR006823 // Neutral/alkaline nonlysosomal ceramidase // 1.0E-126
10367	151566_at	-0.773403	2.97631	-9.2499	1.74e-10	4.5e-09	13.5744	FBgn0035967	CG4641	CG4641	CG4641	39053	5515 // protein binding // inferred from physical interaction	---	---	---
12879	154078_at	-0.946183	4.14292	-9.24821	1.75e-10	4.5e-09	13.5701	FBgn0014469	CG2060	Cyp4e2	Cytochrome P450-4e2	35822	4497 // monooxygenase activity // inferred from electronic annotation /// 16491 // oxidoreductase activity // inferred from electronic annotation /// 5515 // protein binding // inferred from physical interaction /// 5506 // iron ion binding // inferred from electronic annotation /// 20037 // heme binding // inferred from electronic annotation /// 46872 // metal ion binding // inferred from electr…	6118 // electron transport // inferred from electronic annotation /// 8202 // steroid metabolism // inferred from electronic annotation	5792 // microsome // non-traceable author statement /// 16020 // membrane // non-traceable author statement /// 5783 // endoplasmic reticulum // inferred from electronic annotation /// 5792 // microsome // inferred from electronic annotation /// 16020 // membrane // inferred from electronic annotation	IPR001128 // Cytochrome P450 // 2.3E-94
13733	154932_at	-1.10969	2.50699	-9.24804	1.75e-10	4.5e-09	13.5697	FBgn0039293	CG11851	CG11851	CG11851	43031	30 // mannosyltransferase activity // inferred from sequence or structural similarity /// 30 // mannosyltransferase activity // inferred from sequence similarity	6486 // protein amino acid glycosylation // inferred from sequence or structural similarity /// 6486 // protein amino acid glycosylation // inferred from sequence similarity	---	IPR005599 // Plasmid Maintenance Protein // 1.0E-126
2847	144046_at	-0.887926	1.34319	-9.24304	1.77e-10	4.55e-09	13.557	FBgn0024995	CG2680	CG2680	CG2680	31257	3869 // 4-nitrophenylphosphatase activity // inferred from sequence or structural similarity /// 3824 // catalytic activity // inferred from electronic annotation /// 16787 // hydrolase activity // inferred from electronic annotation /// 3869 // 4-nitrophenylphosphatase activity // inferred from sequence similarity	8152 // metabolism // inferred from electronic annotation	---	IPR005834 // Haloacid dehalogenase-like hydrolase // 1.3E-13
5124	146323_at	-1.37643	4.45456	-9.22186	1.87e-10	4.77e-09	13.503	FBgn0032494	CG5945	CG5945	CG5945	34729	5515 // protein binding // inferred from physical interaction	---	---	IPR004272 // Odorant binding protein // 1.9E-47
13028	154227_at	-0.478501	1.74389	-9.2	1.97e-10	5.02e-09	13.4473	FBgn0036579	CG5027	CG5027	CG5027	39775	3756 // protein disulfide isomerase activity // inferred from sequence or structural similarity /// 5509 // calcium ion binding // inferred from electronic annotation /// 5515 // protein binding // inferred from physical interaction /// 3756 // protein disulfide isomerase activity // inferred from sequence similarity	6118 // electron transport // inferred from electronic annotation	16021 // integral to membrane // inferred from sequence or structural similarity /// 16021 // integral to membrane // inferred from sequence similarity	IPR006662 // Thioredoxin type domain // 8.4E-24
11220	152419_at	-0.635169	1.4668	-9.19798	1.98e-10	5.04e-09	13.4422	FBgn0028481	CG4341	CG4341	CG4341	33276	5488 // binding // inferred from electronic annotation	---	---	IPR001440 // TPR repeat // 4.9E-8 /// IPR001440 // TPR repeat // 5.9E-8 /// IPR001440 // TPR repeat // 0.013 /// IPR001440 // TPR repeat // 4.9E-5 /// IPR001440 // TPR repeat // 5.1E-5 /// IPR001440 // TPR repeat // 5.2E-7
3021	144220_at	-1.13278	3.07894	-9.18739	2.03e-10	5.16e-09	13.4152	FBgn0028510	CG15261	CG15261	CG15261	34897	---	6445 // regulation of translation // inferred from electronic annotation /// 17148 // negative regulation of protein biosynthesis // inferred from sequence or structural similarity /// 17148 // negative regulation of protein biosynthesis // inferred from sequence similarity	---	IPR006175 // Endoribonuclease L-PSP // 3.7E-53
13015	154214_at	-0.510301	1.49928	-9.18307	2.06e-10	5.21e-09	13.4041	FBgn0035028	CG3522	Start1	Start1	37927	5386 // carrier activity // inferred from electronic annotation /// 15485 // cholesterol binding // inferred from sequence or structural similarity /// 17127 // cholesterol transporter activity // inferred from sequence or structural similarity /// 5515 // protein binding // inferred from physical interaction /// 15485 // cholesterol binding // inferred from electronic annotation /// 17127 // cho…	6629 // lipid metabolism // inferred from electronic annotation /// 6694 // steroid biosynthesis // inferred from electronic annotation /// 6869 // lipid transport // inferred from electronic annotation	---	IPR002913 // Lipid-binding START // 2.7E-6 /// IPR002913 // Lipid-binding START // 7.8E-10
10784	151983_at	-0.691187	4.05155	-9.16813	2.14e-10	5.38e-09	13.366	FBgn0027590	CG16936	CG16936	CG16936	37960	4364 // glutathione transferase activity // inferred from sequence or structural similarity /// 16740 // transferase activity // inferred from electronic annotation /// 4364 // glutathione transferase activity // inferred from sequence similarity	6952 // defense response // inferred from electronic annotation /// 9636 // response to toxin // inferred from electronic annotation	---	IPR004046 // Glutathione S-transferase, C-terminal // 4.5E-11 /// IPR004045 // Glutathione S-transferase, N-terminal // 1.7E-15
11961	153160_at	-0.483911	1.5563	-9.15786	2.19e-10	5.49e-09	13.3397	FBgn0033741	CG8545	CG8545	CG8545	36365	3676 // nucleic acid binding // inferred from electronic annotation	6364 // rRNA processing // inferred from sequence or structural similarity /// 16072 // rRNA metabolism // inferred from electronic annotation /// 6364 // rRNA processing // inferred from sequence similarity	5730 // nucleolus // inferred from sequence or structural similarity /// 5730 // nucleolus // inferred from sequence similarity	IPR001678 // Bacterial Sun/eukaryotic nucleolar Nop1/Nop2 // 4.8E-126
12317	153516_at	-0.536439	1.67375	-9.1487	2.24e-10	5.61e-09	13.3163	FBgn0013773	CG10240	Cyp6a22	Cyp6a22	49847	4497 // monooxygenase activity // inferred from electronic annotation /// 16491 // oxidoreductase activity // inferred from electronic annotation /// 5515 // protein binding // inferred from physical interaction /// 5506 // iron ion binding // inferred from electronic annotation /// 20037 // heme binding // inferred from electronic annotation /// 46872 // metal ion binding // inferred from electr…	6118 // electron transport // inferred from electronic annotation /// 8202 // steroid metabolism // inferred from electronic annotation	5792 // microsome // non-traceable author statement /// 16020 // membrane // non-traceable author statement /// 5783 // endoplasmic reticulum // inferred from electronic annotation /// 5792 // microsome // inferred from electronic annotation /// 16020 // membrane // inferred from electronic annotation	IPR001128 // Cytochrome P450 // 6.6E-106
1677	142876_at	-0.617528	3.06491	-9.14579	2.26e-10	5.64e-09	13.3089	FBgn0013263	CG33261	Trl	Trithorax-like	2768981	3677 // DNA binding // non-traceable author statement /// 3702 // RNA polymerase II transcription factor activity // non-traceable author statement /// 3704 // specific RNA polymerase II transcription factor activity // inferred from mutant phenotype /// 3704 // specific RNA polymerase II transcription factor activity // non-traceable author statement /// 5515 // protein binding // inferred from …	280 // nuclear division // inferred from mutant phenotype /// 6325 // establishment and/or maintenance of chromatin architecture // non-traceable author statement /// 6357 // regulation of transcription from RNA polymerase II promoter // non-traceable author statement /// 7549 // dosage compensation // inferred from mutant phenotype /// 35186 // syncytial blastoderm mitotic cell cycle // inferred…	785 // chromatin // non-traceable author statement /// 5634 // nucleus // inferred from direct assay /// 5634 // nucleus // non-traceable author statement /// 5721 // centric heterochromatin // inferred from direct assay /// 5721 // centric heterochromatin // traceable author statement /// 791 // euchromatin // inferred from direct assay /// 5700 // polytene chromosome // inferred from direct ass…	IPR000210 // BTB/POZ domain // 6.7E-30
11370	152569_at	-0.901055	2.1324	-9.14281	2.28e-10	5.66e-09	13.3012	FBgn0033564 /// FBgn0061356	CG11919 /// CG18003	CG11919 /// CG18003	CG11919 /// CG18003	3771779 /// 3772165	8891 // glycolate oxidase activity // inferred from sequence or structural similarity /// 166 // nucleotide binding // inferred from electronic annotation /// 5524 // ATP binding // inferred from electronic annotation /// 17111 // nucleoside-triphosphatase activity // inferred from electronic annotation /// 16491 // oxidoreductase activity // inferred from electronic annotation /// 8891 // glycol…	6118 // electron transport // inferred from electronic annotation /// 7031 // peroxisome organization and biogenesis // inferred from sequence or structural similarity /// 7031 // peroxisome organization and biogenesis // inferred from sequence similarity	5777 // peroxisome // inferred from sequence or structural similarity /// 5777 // peroxisome // inferred from sequence similarity	---
6849	148048_at	-1.37394	0.413383	-9.13388	2.33e-10	5.75e-09	13.2784	FBgn0035343	CG16762	CG16762	CG16762	38310	---	---	---	IPR007931 // Protein of unknown function DUF725 // 1.8E-77
10519	151718_at	-0.67096	3.02964	-9.10426	2.51e-10	6.16e-09	13.2025	FBgn0045073 /// FBgn0053180	CG9126	Stim /// Ranbp16	Stromal interaction molecule /// Ranbp16	118436 /// 32556	5515 // protein binding // inferred from physical interaction /// 5515 // protein binding // inferred from electronic annotation	7155 // cell adhesion // non-traceable author statement /// 7155 // cell adhesion // inferred from electronic annotation	5886 // plasma membrane // non-traceable author statement /// 16020 // membrane // inferred from electronic annotation /// 16021 // integral to membrane // inferred from electronic annotation	---
107	141306_at	-0.646637	1.92192	-9.08531	2.63e-10	6.44e-09	13.1539	FBgn0034888	CG5431	CG5431	CG5431	37743	17067 // tyrosine-ester sulfotransferase activity // inferred from sequence or structural similarity /// 8146 // sulfotransferase activity // inferred from electronic annotation /// 17067 // tyrosine-ester sulfotransferase activity // inferred from sequence similarity	---	---	IPR000863 // Sulfotransferase // 1.1E-88 /// IPR000863 // Sulfotransferase // 1.1E-88
11412	152611_at	-1.02686	2.2728	-9.07767	2.68e-10	6.55e-09	13.1343	FBgn0000422	CG10697	Ddc	Dopa decarboxylase	35190	4058 // aromatic-L-amino-acid decarboxylase activity // inferred from mutant phenotype /// 4058 // aromatic-L-amino-acid decarboxylase activity // non-traceable author statement /// 4058 // aromatic-L-amino-acid decarboxylase activity // traceable author statement /// 5515 // protein binding // inferred from physical interaction /// 4058 // aromatic-L-amino-acid decarboxylase activity // inferred…	6584 // catecholamine metabolism // non-traceable author statement /// 6585 // dopamine biosynthesis from tyrosine // inferred from mutant phenotype /// 6587 // serotonin biosynthesis from tryptophan // inferred from mutant phenotype /// 7611 // learning and/or memory // non-traceable author statement /// 7619 // courtship behavior // non-traceable author statement /// 8062 // eclosion rhythm // …	---	IPR002129 // Pyridoxal-dependent decarboxylase // 1.0E-126 /// IPR002129 // Pyridoxal-dependent decarboxylase // 1.0E-126 /// IPR002129 // Pyridoxal-dependent decarboxylase // 1.0E-126
12743	153942_at	-0.792697	0.844972	-9.07125	2.73e-10	6.64e-09	13.1179	FBgn0030710	CG8924	CG8924	CG8924	32557	3677 // DNA binding // non-traceable author statement /// 5515 // protein binding // inferred from electronic annotation /// 30528 // transcription regulator activity // inferred from electronic annotation /// 5515 // protein binding // inferred from physical interaction /// 42802 // identical protein binding // inferred from physical interaction /// 3677 // DNA binding // inferred from electroni…	6357 // regulation of transcription from RNA polymerase II promoter // inferred from electronic annotation /// 7530 // sex determination // inferred from electronic annotation /// 19226 // transmission of nerve impulse // inferred from electronic annotation /// 45449 // regulation of transcription // inferred from electronic annotation	5634 // nucleus // inferred from electronic annotation	IPR000210 // BTB/POZ domain // 3.6E-23
9676	150875_at	-0.672482	2.02515	-9.0698	2.74e-10	6.65e-09	13.1141	FBgn0051030	CG31030	CG31030	CG31030	318563	4785 // copper, zinc superoxide dismutase activity // inferred from electronic annotation /// 46872 // metal ion binding // inferred from electronic annotation /// 46933 // hydrogen-transporting ATP synthase activity, rotational mechanism // inferred from electronic annotation /// 46961 // hydrogen-transporting ATPase activity, rotational mechanism // inferred from electronic annotation	6801 // superoxide metabolism // inferred from electronic annotation /// 15986 // ATP synthesis coupled proton transport // inferred from electronic annotation	16021 // integral to membrane // inferred from electronic annotation /// 16469 // proton-transporting two-sector ATPase complex // inferred from electronic annotation	---
8416	149615_at	-0.803861	1.58516	-9.06525	2.77e-10	6.7e-09	13.1025	FBgn0037788	CG3940	CG3940	CG3940	41238	4089 // carbonate dehydratase activity // inferred from sequence or structural similarity /// 8270 // zinc ion binding // inferred from electronic annotation /// 4089 // carbonate dehydratase activity // inferred from electronic annotation /// 4089 // carbonate dehydratase activity // inferred from sequence similarity	6730 // one-carbon compound metabolism // inferred from electronic annotation	---	IPR001148 // Carbonic anhydrase, eukaryotic // 7.7E-20 /// IPR001148 // Carbonic anhydrase, eukaryotic // 2.0E-14
3081	144280_at	-0.756542	1.31379	-9.05066	2.88e-10	6.93e-09	13.065	FBgn0028872	CG18095	CG18095	CG18095	34823	---	7155 // cell adhesion // inferred from electronic annotation /// 19226 // transmission of nerve impulse // inferred from electronic annotation	---	IPR001611 // Leucine-rich repeat // 0.26 /// IPR001611 // Leucine-rich repeat // 0.0070 /// IPR001611 // Leucine-rich repeat // 0.012 /// IPR001611 // Leucine-rich repeat // 4.8E-5 /// IPR001611 // Leucine-rich repeat // 5.4E-4 /// IPR001611 // Leucine-rich repeat // 0.056 /// IPR001611 // Leucine-rich repeat // 0.058 /// IPR001611 // Leucine-rich repeat // 0.0011 /// IPR001611 // Leucine-rich re…
12230	153429_at	-0.841566	1.86833	-9.04918	2.89e-10	6.95e-09	13.0612	FBgn0030317	CG1561	CG1561	CG1561	32108	16301 // kinase activity // inferred from electronic annotation /// 16740 // transferase activity // inferred from electronic annotation	---	---	IPR004119 // Protein of unknown function DUF227 // 2.0E-99 /// IPR004119 // Protein of unknown function DUF227 // 2.0E-99
5015	146214_at	-1.15146	1.77138	-9.03551	2.99e-10	7.16e-09	13.026	FBgn0032322	CG16743	CG16743	CG16743	34517	---	---	---	---
11842	153041_at	-1.22308	4.46845	-9.02347	3.08e-10	7.37e-09	12.9951	FBgn0005671	CG17369	Vha55	Vacuolar H<up>+</up>-ATPase 55kD B subunit	41550	5524 // ATP binding // inferred from electronic annotation /// 8553 // hydrogen-exporting ATPase activity, phosphorylative mechanism // inferred from sequence or structural similarity /// 8553 // hydrogen-exporting ATPase activity, phosphorylative mechanism // non-traceable author statement /// 46933 // hydrogen-transporting ATP synthase activity, rotational mechanism // inferred from electronic …	6144 // purine base metabolism // inferred from electronic annotation /// 6754 // ATP biosynthesis // inferred from electronic annotation /// 6928 // cell motility // inferred from electronic annotation /// 7010 // cytoskeleton organization and biogenesis // inferred from electronic annotation /// 15986 // ATP synthesis coupled proton transport // inferred from electronic annotation /// 15988 // …	221 // hydrogen-transporting ATPase V1 domain // inferred from sequence or structural similarity /// 221 // hydrogen-transporting ATPase V1 domain // non-traceable author statement /// 16469 // proton-transporting two-sector ATPase complex // inferred from electronic annotation /// 5737 // cytoplasm // inferred from electronic annotation /// 221 // hydrogen-transporting ATPase V1 domain // inferr…	IPR004100 // H+-transporting two-sector ATPase, alpha/beta subunit, N-terminal // 2.2E-16 /// IPR000194 // H+-transporting two-sector ATPase, alpha/beta subunit, central region // 9.5E-82 /// IPR000793 // H+-transporting two-sector ATPase, alpha/beta subunit, C-terminal // 6.2E-27
966	142165_at	-0.909026	3.7226	-9.02271	3.09e-10	7.37e-09	12.9931	FBgn0031245	CG3625	CG3625	CG3625	33198	---	---	---	IPR006838 // FAR-17a/AIG1-like protein // 6.7E-120 /// IPR006838 // FAR-17a/AIG1-like protein // 8.1E-119
3036	144235_at	-0.618627	1.24752	-9.01096	3.18e-10	7.56e-09	12.9628	FBgn0028545	CG8942	CG8942	CG8942	34816	5198 // structural molecule activity // inferred from electronic annotation /// 5529 // sugar binding // inferred from electronic annotation /// 17147 // Wnt-protein binding // inferred from sequence or structural similarity /// 17147 // Wnt-protein binding // inferred from sequence similarity	16055 // Wnt receptor signaling pathway // inferred from sequence or structural similarity /// 16055 // Wnt receptor signaling pathway // inferred from sequence similarity	---	IPR003019 // Metallothionein superfamily // 0.05 /// IPR003341 // Protein of unknown function DUF139 // 2.4E-6
11312	152511_at	-1.07213	1.47683	-9.009	3.2e-10	7.58e-09	12.9578	FBgn0013949	CG7021	Ela	Elastin-like	42970	5515 // protein binding // inferred from physical interaction	6817 // phosphate transport // inferred from electronic annotation	5737 // cytoplasm // inferred from electronic annotation	---
3501	144700_at	-0.998865	2.2818	-8.99539	3.31e-10	7.81e-09	12.9227	FBgn0030040	CG15347	CG15347	CG15347	31779	---	---	---	IPR008472 // Protein of unknown function DUF753 // 4.6E-77
12763	153962_at	-0.500888	1.9465	-8.99468	3.32e-10	7.81e-09	12.9209	FBgn0037019	CG3947	CG3947	CG3947	40293	---	7031 // peroxisome organization and biogenesis // inferred from sequence or structural similarity /// 7031 // peroxisome organization and biogenesis // inferred from sequence similarity	---	---
332	141531_at	-0.588227	2.04351	-8.99249	3.33e-10	7.84e-09	12.9153	FBgn0030603	CG5541	CG5541	CG5541	2768877	---	---	---	---
5563	146762_at	-0.734484	1.0171	-8.97916	3.45e-10	8.03e-09	12.8809	FBgn0033214	CG1941	CG1941	CG1941	35718	---	---	---	IPR007130 // Diacylglycerol acyltransferase // 1.0E-126
12131	153330_at	-1.10531	0.998027	-8.9771	3.47e-10	8.04e-09	12.8756	FBgn0038964	CG13849	Nop56	Nop56	42633	3729 // mRNA binding // inferred from electronic annotation	16072 // rRNA metabolism // inferred from electronic annotation	5730 // nucleolus // inferred from sequence or structural similarity /// 5730 // nucleolus // non-traceable author statement /// 30532 // small nuclear ribonucleoprotein complex // inferred from sequence or structural similarity /// 5730 // nucleolus // inferred from sequence similarity /// 30532 // small nuclear ribonucleoprotein complex // inferred from sequence similarity	IPR002687 // Pre-mRNA processing ribonucleoprotein, binding region // 5.0E-88
13560	154759_at	-0.524509	0.648536	-8.96853	3.54e-10	8.18e-09	12.8535	FBgn0030851	CG8326	CG8326	CG8326	32738	---	---	---	---
1180	142379_s_at	-0.81346	0.302132	-8.9609	3.61e-10	8.31e-09	12.8338	FBgn0037931	CG18476	CG18476	CG18476	41404	3676 // nucleic acid binding // inferred from electronic annotation /// 8270 // zinc ion binding // inferred from electronic annotation /// 30528 // transcription regulator activity // inferred from electronic annotation /// 5515 // protein binding // inferred from physical interaction /// 46872 // metal ion binding // inferred from electronic annotation	6139 // nucleobase, nucleoside, nucleotide and nucleic acid metabolism // inferred from electronic annotation /// 6357 // regulation of transcription from RNA polymerase II promoter // inferred from electronic annotation /// 6366 // transcription from RNA polymerase II promoter // inferred from electronic annotation	5634 // nucleus // inferred from electronic annotation	IPR007087 // Zn-finger, C2H2 type // 8.6E-5 /// IPR007087 // Zn-finger, C2H2 type // 8.2E-5 /// IPR007087 // Zn-finger, C2H2 type // 6.8E-5 /// IPR007087 // Zn-finger, C2H2 type // 5.6E-5 /// IPR007087 // Zn-finger, C2H2 type // 1.8E-6 /// IPR007087 // Zn-finger, C2H2 type // 2.0E-4 /// IPR007087 // Zn-finger, C2H2 type // 8.2E-5
2779	143978_at	-0.894644	1.93545	-8.9391	3.82e-10	8.73e-09	12.7775	FBgn0023179	CG6438	amon	amontillado	43215	4286 // proprotein convertase 2 activity // inferred from sequence or structural similarity /// 4291 // subtilisin activity // non-traceable author statement /// 8233 // peptidase activity // inferred from direct assay /// 8233 // peptidase activity // inferred from sequence or structural similarity /// 4289 // subtilase activity // inferred from electronic annotation /// 8233 // peptidase activi…	6508 // proteolysis // inferred from direct assay /// 16486 // peptide hormone processing // inferred from sequence or structural similarity /// 35187 // hatching behavior // inferred from mutant phenotype /// 6508 // proteolysis // inferred from electronic annotation /// 7218 // neuropeptide signaling pathway // inferred from electronic annotation /// 16486 // peptide hormone processing // infer…	---	IPR002884 // Peptidase S8B, proprotein convertase, P domain // 8.3E-74 /// IPR000209 // Peptidase S8 and S53, subtilisin, kexin, sedolisin // 3.2E-111
1380	142579_at	-0.738716	0.524232	-8.92147	4e-10	9.12e-09	12.7319	FBgn0029148	CG5258	NHP2	NHP2	44005	3735 // structural constituent of ribosome // inferred from electronic annotation /// 30515 // snoRNA binding // inferred from sequence or structural similarity /// 30559 // rRNA pseudouridylation guide activity // inferred from sequence or structural similarity /// 5515 // protein binding // inferred from physical interaction /// 3723 // RNA binding // inferred from electronic annotation /// 305…	6365 // 35S primary transcript processing // inferred from sequence or structural similarity /// 6412 // protein biosynthesis // inferred from electronic annotation /// 31118 // rRNA pseudouridine synthesis // inferred from sequence or structural similarity /// 6364 // rRNA processing // inferred from electronic annotation /// 7046 // ribosome biogenesis // inferred from electronic annotation ///…	5730 // nucleolus // non-traceable author statement /// 5732 // small nucleolar ribonucleoprotein complex // inferred from sequence or structural similarity /// 5840 // ribosome // inferred from electronic annotation /// 5634 // nucleus // inferred from electronic annotation /// 30529 // ribonucleoprotein complex // inferred from electronic annotation /// 5732 // small nucleolar ribonucleoprotein…	IPR004038 // Ribosomal protein L7Ae/L30e/S12e/Gadd45 // 4.8E-32
13808	155007_at	-0.781757	2.57262	-8.92023	4.01e-10	9.13e-09	12.7287	FBgn0052428	CG32428	CG32428	CG32428	50105	---	---	---	---
13233	154432_at	-0.733935	1.86823	-8.91577	4.05e-10	9.19e-09	12.7171	FBgn0030336	CG1578	CG1578	CG1578	32135	---	---	---	IPR006175 // Endoribonuclease L-PSP // 5.1E-10 /// IPR006175 // Endoribonuclease L-PSP // 6.7E-12 /// IPR002761 // Protein of unknown function DUF71 // 2.7E-75
1719	142918_at	-0.827054	1.60606	-8.90598	4.16e-10	9.39e-09	12.6918	FBgn0025394	CG32810	CG32810	CG32810	31110	5216 // ion channel activity // inferred from sequence or structural similarity /// 5249 // voltage-gated potassium channel activity // inferred from electronic annotation /// 5515 // protein binding // inferred from electronic annotation /// 5216 // ion channel activity // inferred from sequence similarity	6811 // ion transport // inferred from sequence or structural similarity /// 6813 // potassium ion transport // inferred from electronic annotation /// 6811 // ion transport // inferred from sequence similarity	8076 // voltage-gated potassium channel complex // inferred from electronic annotation /// 16020 // membrane // inferred from electronic annotation	IPR003131 // K+ channel tetramerisation // 5.9E-36
13426	154625_at	-0.761597	0.670301	-8.90299	4.19e-10	9.45e-09	12.6841	FBgn0026148	CG12253	CG12253	CG12253	47730	---	---	---	---
4887	146086_at	-0.671588	1.36694	-8.89941	4.23e-10	9.51e-09	12.6748	FBgn0032116	CG3759	CG3759	CG3759	34258	4322 // ferroxidase activity // inferred from sequence or structural similarity /// 5381 // iron ion transporter activity // inferred from sequence or structural similarity /// 5507 // copper ion binding // inferred from electronic annotation /// 16491 // oxidoreductase activity // inferred from electronic annotation /// 46872 // metal ion binding // inferred from electronic annotation /// 4322 /…	6952 // defense response // inferred from electronic annotation /// 9636 // response to toxin // inferred from electronic annotation	---	IPR001117 // Multicopper oxidase, type 1 // 2.5E-19
10456	151655_at	-0.762672	3.02027	-8.89279	4.3e-10	9.65e-09	12.6577	FBgn0034087	CG8443	CG8443	CG8443	36793	3743 // translation initiation factor activity // inferred from sequence or structural similarity /// 5488 // binding // inferred from electronic annotation /// 3743 // translation initiation factor activity // inferred from sequence similarity	6413 // translational initiation // inferred from sequence or structural similarity /// 6445 // regulation of translation // inferred from electronic annotation /// 6413 // translational initiation // inferred from sequence similarity	5852 // eukaryotic translation initiation factor 3 complex // inferred from sequence or structural similarity /// 5852 // eukaryotic translation initiation factor 3 complex // inferred from sequence similarity	---
558	141757_at	-0.733291	2.79499	-8.88757	4.36e-10	9.77e-09	12.6441	FBgn0039674	CG1907	CG1907	CG1907	43483	5386 // carrier activity // inferred from sequence or structural similarity /// 5488 // binding // inferred from electronic annotation /// 15367 // oxoglutarate:malate antiporter activity // inferred from sequence or structural similarity /// 5215 // transporter activity // inferred from electronic annotation /// 5386 // carrier activity // inferred from sequence similarity /// 15367 // oxoglutar…	6812 // cation transport // inferred from electronic annotation /// 6839 // mitochondrial transport // inferred from sequence or structural similarity /// 15742 // alpha-ketoglutarate transport // inferred from sequence or structural similarity /// 15743 // malate transport // inferred from sequence or structural similarity /// 6810 // transport // inferred from electronic annotation /// 6839 // …	5740 // mitochondrial envelope // inferred from sequence or structural similarity /// 5743 // mitochondrial inner membrane // inferred from sequence or structural similarity /// 5743 // mitochondrial inner membrane // inferred from electronic annotation /// 16020 // membrane // inferred from electronic annotation /// 16021 // integral to membrane // inferred from electronic annotation /// 5740 //…	IPR001993 // Mitochondrial substrate carrier // 4.7E-32 /// IPR001993 // Mitochondrial substrate carrier // 2.2E-25 /// IPR001993 // Mitochondrial substrate carrier // 1.8E-26
9542	150741_at	-0.572278	0.693827	-8.87902	4.45e-10	9.97e-09	12.622	FBgn0039531	CG5611	CG5611	CG5611	43318	8416 // delta5-delta2,4-dienoyl-CoA isomerase activity // inferred from sequence or structural similarity /// 16491 // oxidoreductase activity // inferred from electronic annotation /// 16836 // hydro-lyase activity // inferred from electronic annotation /// 8416 // delta5-delta2,4-dienoyl-CoA isomerase activity // inferred from sequence similarity	6635 // fatty acid beta-oxidation // inferred from electronic annotation	---	IPR001753 // Enoyl-CoA hydratase/isomerase // 4.4E-31
13190	154389_at	-0.567123	1.88201	-8.87229	4.53e-10	1.01e-08	12.6045	FBgn0031233	CG11490	CG11490	CG11490	33184	5096 // GTPase activator activity // inferred from sequence or structural similarity /// 5509 // calcium ion binding // inferred from electronic annotation /// 5515 // protein binding // inferred from physical interaction /// 5096 // GTPase activator activity // inferred from sequence similarity	6886 // intracellular protein transport // inferred from electronic annotation	---	IPR000195 // RabGAP/TBC domain // 7.5E-6
13635	154834_at	-0.761008	1.05591	-8.86172	4.66e-10	1.04e-08	12.5771	FBgn0035960	CG4942	CG4942	CG4942	39044	5515 // protein binding // inferred from physical interaction	8535 // cytochrome c oxidase complex assembly // inferred from sequence or structural similarity /// 51205 // protein insertion into membrane // inferred from electronic annotation /// 8535 // cytochrome c oxidase complex assembly // inferred from sequence similarity	5743 // mitochondrial inner membrane // inferred from sequence or structural similarity /// 16021 // integral to membrane // inferred from electronic annotation /// 5743 // mitochondrial inner membrane // inferred from sequence similarity	IPR001708 // 60 kDa inner membrane protein // 1.6E-7
11843	153042_at	-0.756771	1.14635	-8.86005	4.68e-10	1.04e-08	12.5728	FBgn0036968	CG6680	CG6680	CG6680	40234	4867 // serine-type endopeptidase inhibitor activity // inferred from sequence or structural similarity /// 4867 // serine-type endopeptidase inhibitor activity // inferred from electronic annotation /// 4867 // serine-type endopeptidase inhibitor activity // inferred from sequence similarity	6508 // proteolysis // inferred from electronic annotation /// 6915 // apoptosis // inferred from electronic annotation	---	IPR000215 // Serpin // 1.7E-51
12194	153393_at	-0.528808	1.09148	-8.82585	5.11e-10	1.13e-08	12.484	FBgn0003515	CG4314	st	scarlet	39836	166 // nucleotide binding // inferred from electronic annotation /// 5395 // eye pigment precursor transporter activity // non-traceable author statement /// 5524 // ATP binding // inferred from electronic annotation /// 15646 // permease activity // inferred from electronic annotation /// 42626 // ATPase activity, coupled to transmembrane movement of substances // inferred from sequence or struc…	6726 // eye pigment biosynthesis // non-traceable author statement /// 6727 // ommochrome biosynthesis // inferred from mutant phenotype /// 6727 // ommochrome biosynthesis // non-traceable author statement /// 6856 // eye pigment precursor transport // traceable author statement /// 6810 // transport // inferred from electronic annotation	5887 // integral to plasma membrane // non-traceable author statement /// 43190 // ATP-binding cassette (ABC) transporter complex // inferred from sequence or structural similarity /// 16020 // membrane // inferred from electronic annotation /// 16021 // integral to membrane // inferred from electronic annotation /// 43190 // ATP-binding cassette (ABC) transporter complex // inferred from sequenc…	IPR003439 // ABC transporter // 2.5E-37
5156	146355_at	-0.995751	0.0471875	-8.81907	5.2e-10	1.14e-08	12.4663	FBgn0032551	CG18636	CG18636	CG18636	2768923	4252 // serine-type endopeptidase activity // non-traceable author statement	---	---	IPR001254 // Peptidase S1, chymotrypsin // 2.0E-9 /// IPR001254 // Peptidase S1, chymotrypsin // 2.8E-19
8198	149397_at	-0.627193	0.327721	-8.81849	5.2e-10	1.14e-08	12.4648	FBgn0037435	CG18048	CG18048	CG18048	40782	---	---	---	IPR007871 // Protein of unknown function DUF715 // 1.0E-126
3859	145058_at	-1.21594	2.77257	-8.8174	5.22e-10	1.15e-08	12.462	FBgn0030558	CG1461	CG1461	CG1461	32381	4838 // tyrosine transaminase activity // inferred from sequence or structural similarity /// 16847 // 1-aminocyclopropane-1-carboxylate synthase activity // inferred from electronic annotation /// 46872 // metal ion binding // inferred from electronic annotation /// 5515 // protein binding // inferred from physical interaction /// 4838 // tyrosine transaminase activity // inferred from electroni…	9058 // biosynthesis // inferred from electronic annotation /// 9063 // amino acid catabolism // inferred from electronic annotation /// 9072 // aromatic amino acid family metabolism // inferred from electronic annotation /// 30001 // metal ion transport // inferred from electronic annotation /// 6519 // amino acid and derivative metabolism // inferred from electronic annotation	---	IPR004839 // Aminotransferase, class I and II // 1.2E-44
6409	147608_at	-1.0402	2.05064	-8.81701	5.22e-10	1.15e-08	12.461	FBgn0027073	CG4302	CG4302	CG4302	37420	15020 // glucuronosyltransferase activity // inferred from sequence or structural similarity /// 5515 // protein binding // inferred from physical interaction /// 16740 // transferase activity // inferred from electronic annotation /// 16757 // transferase activity, transferring glycosyl groups // inferred from electronic annotation /// 16758 // transferase activity, transferring hexosyl groups /…	5976 // polysaccharide metabolism // inferred from electronic annotation /// 6952 // defense response // inferred from electronic annotation /// 9636 // response to toxin // inferred from electronic annotation /// 8152 // metabolism // inferred from electronic annotation	---	IPR002213 // UDP-glucoronosyl/UDP-glucosyl transferase // 2.1E-77
9366	150565_at	-0.744768	1.33988	-8.81053	5.31e-10	1.16e-08	12.4441	FBgn0039297	CG11852	CG11852	CG11852	43035	5515 // protein binding // inferred from physical interaction	---	---	IPR004272 // Odorant binding protein // 1.1E-59
10297	151496_s_at	-1.17061	3.95175	-8.80213	5.43e-10	1.19e-08	12.4223	FBgn0027578	CG14526	CG14526	CG14526	43413	4245 // neprilysin activity // inferred from electronic annotation /// 8270 // zinc ion binding // inferred from electronic annotation /// 16511 // endothelin-converting enzyme activity // inferred from sequence or structural similarity /// 8233 // peptidase activity // inferred from electronic annotation /// 8237 // metallopeptidase activity // inferred from electronic annotation /// 16787 // hy…	6508 // proteolysis // inferred from electronic annotation /// 7165 // signal transduction // inferred from electronic annotation	16020 // membrane // inferred from electronic annotation	IPR008753 // Peptidase M13 // 9.3E-10 /// IPR000718 // Peptidase M13, neprilysin // 2.0E-46
6226	147425_at	-0.616912	1.21984	-8.79471	5.53e-10	1.21e-08	12.403	FBgn0034323	CG18537	CG18537	CG18537	37094	---	---	---	IPR010512 // Protein of unknown function DUF1091 // 1.0E-126
5	141204_at	-0.601161	2.06458	-8.78124	5.73e-10	1.25e-08	12.3679	FBgn0032643	CG6453	CG6453	CG6453	35056	4558 // alpha-glucosidase activity // inferred from sequence or structural similarity /// 5509 // calcium ion binding // inferred from electronic annotation /// 5515 // protein binding // inferred from physical interaction /// 4558 // alpha-glucosidase activity // inferred from sequence similarity	7165 // signal transduction // inferred from electronic annotation	17177 // alpha-glucosidase II complex // inferred from sequence or structural similarity /// 5783 // endoplasmic reticulum // inferred from electronic annotation /// 17177 // alpha-glucosidase II complex // inferred from sequence similarity	IPR002048 // Calcium-binding EF-hand // 0.05
13368	154567_at	-0.714637	1.9752	-8.77871	5.76e-10	1.25e-08	12.3613	FBgn0037687	CG8132	CG8132	CG8132	41121	257 // nitrilase activity // inferred from sequence or structural similarity /// 16810 // hydrolase activity, acting on carbon-nitrogen (but not peptide) bonds // inferred from electronic annotation /// 257 // nitrilase activity // inferred from sequence similarity	6807 // nitrogen compound metabolism // inferred from electronic annotation	---	IPR003010 // Nitrilase/cyanide hydratase and apolipoprotein N-acyltransferase // 8.3E-50
10334	151533_at	-1.22668	1.47904	-8.76969	5.9e-10	1.28e-08	12.3378	FBgn0051148	CG31148	CG31148	CG31148	42796	4348 // glucosylceramidase activity // inferred from sequence or structural similarity /// 15926 // glucosidase activity // inferred from electronic annotation /// 16799 // hydrolase activity, hydrolyzing N-glycosyl compounds // inferred from electronic annotation /// 4348 // glucosylceramidase activity // inferred from electronic annotation /// 4348 // glucosylceramidase activity // inferred fro…	6629 // lipid metabolism // inferred from electronic annotation /// 6665 // sphingolipid metabolism // inferred from electronic annotation /// 7040 // lysosome organization and biogenesis // inferred from electronic annotation	5764 // lysosome // inferred from electronic annotation	IPR001139 // Glycoside hydrolase, family 30 // 2.3 /// IPR001139 // Glycoside hydrolase, family 30 // 9.2E-6 /// IPR001139 // Glycoside hydrolase, family 30 // 8.7E-70
4533	145732_at	-0.934219	1.3183	-8.76089	6.03e-10	1.31e-08	12.3149	FBgn0031562	CG3604	CG3604	CG3604	33593	4867 // serine-type endopeptidase inhibitor activity // inferred from sequence or structural similarity /// 4867 // serine-type endopeptidase inhibitor activity // inferred from electronic annotation /// 4867 // serine-type endopeptidase inhibitor activity // inferred from sequence similarity	---	---	IPR002223 // Pancreatic trypsin inhibitor (Kunitz) // 9.4E-30
116	141315_at	-1.30662	4.29463	-8.74861	6.23e-10	1.34e-08	12.2828	FBgn0040732	CG16926	CG16926	CG16926	50205	5515 // protein binding // inferred from physical interaction	---	---	---
10538	151737_at	-0.763783	3.17897	-8.74957	6.21e-10	1.34e-08	12.2854	FBgn0052210	CG32210	CG32210	CG32210	40127	4842 // ubiquitin-protein ligase activity // inferred from electronic annotation /// 8270 // zinc ion binding // inferred from electronic annotation /// 5488 // binding // inferred from electronic annotation /// 5515 // protein binding // inferred from electronic annotation	16567 // protein ubiquitination // inferred from electronic annotation	151 // ubiquitin ligase complex // inferred from electronic annotation	IPR001841 // Zn-finger, RING // 3.6E-6
12832	154031_at	-1.0807	3.40612	-8.74911	6.22e-10	1.34e-08	12.2842	FBgn0013763	CG5210	Chit	Chitinase-like	36868	4568 // chitinase activity // inferred from sequence or structural similarity /// 4568 // chitinase activity // non-traceable author statement /// 8083 // growth factor activity // inferred from electronic annotation /// 16799 // hydrolase activity, hydrolyzing N-glycosyl compounds // inferred from electronic annotation /// 4553 // hydrolase activity, hydrolyzing O-glycosyl compounds // inferred …	6036 // cuticle chitin catabolism // inferred from sequence or structural similarity /// 6036 // cuticle chitin catabolism // non-traceable author statement /// 7165 // signal transduction // inferred from electronic annotation /// 7267 // cell-cell signaling // inferred from electronic annotation /// 5975 // carbohydrate metabolism // inferred from electronic annotation /// 6032 // chitin catabo…	5576 // extracellular region // inferred from direct assay	IPR001223 // Glycoside hydrolase, family 18 // 2.7E-101
5972	147171_at	-0.671746	0.363006	-8.73662	6.42e-10	1.38e-08	12.2516	FBgn0033873	CG6337	CG6337	CG6337	36530	4197 // cysteine-type endopeptidase activity // inferred from sequence or structural similarity /// 5515 // protein binding // inferred from physical interaction /// 8234 // cysteine-type peptidase activity // inferred from electronic annotation /// 4197 // cysteine-type endopeptidase activity // inferred from sequence similarity	6508 // proteolysis // inferred from electronic annotation /// 19538 // protein metabolism // inferred from electronic annotation	---	---
2575	143774_at	-0.545647	2.4984	-8.73496	6.45e-10	1.38e-08	12.2472	FBgn0015000	CG3469	ggt-I	subunit of type I geranylgeranyl transferase	33704	4661 // protein geranylgeranyltransferase activity // inferred from sequence or structural similarity /// 4662 // CAAX-protein geranylgeranyltransferase activity // non-traceable author statement /// 8415 // acyltransferase activity // inferred from electronic annotation /// 3824 // catalytic activity // inferred from electronic annotation /// 16740 // transferase activity // inferred from electr…	6497 // protein amino acid lipidation // inferred from electronic annotation /// 7265 // Ras protein signal transduction // inferred from sequence or structural similarity /// 7265 // Ras protein signal transduction // inferred from sequence similarity	---	IPR001330 // Prenyltransferase/squalene oxidase // 2.4E-9 /// IPR001330 // Prenyltransferase/squalene oxidase // 4.8E-7 /// IPR001330 // Prenyltransferase/squalene oxidase // 1.1E-8 /// IPR001330 // Prenyltransferase/squalene oxidase // 6.1E-7
12168	153367_at	-0.577843	1.21765	-8.72728	6.58e-10	1.41e-08	12.2272	FBgn0037977	CG3132	Ect3	Ect3	41457	4565 // beta-galactosidase activity // inferred from sequence or structural similarity /// 4565 // beta-galactosidase activity // inferred from electronic annotation /// 4565 // beta-galactosidase activity // inferred from sequence similarity	5975 // carbohydrate metabolism // inferred from electronic annotation /// 35071 // salivary gland cell autophagic cell death // inferred from expression pattern /// 48102 // autophagic cell death // inferred from expression pattern	5764 // lysosome // inferred from sequence or structural similarity /// 9341 // beta-galactosidase complex // inferred from electronic annotation /// 5764 // lysosome // inferred from sequence similarity	IPR001944 // Glycoside hydrolase, family 35 // 1.5E-119 /// IPR001944 // Glycoside hydrolase, family 35 // 2.8E-8
5525	146724_at	-1.05519	3.60887	-8.72583	6.61e-10	1.41e-08	12.2234	FBgn0024293	CG1865	Spn43Ab	Serine protease inhibitor 43Ab	45040	4867 // serine-type endopeptidase inhibitor activity // inferred from sequence or structural similarity /// 4867 // serine-type endopeptidase inhibitor activity // inferred from electronic annotation /// 4867 // serine-type endopeptidase inhibitor activity // inferred from sequence similarity	6508 // proteolysis // inferred from electronic annotation	---	IPR000215 // Serpin // 5.8E-62
13453	154652_at	-0.903774	1.92022	-8.72447	6.63e-10	1.41e-08	12.2198	FBgn0015568	CG1031	Est1	Esterase-1	40909	4091 // carboxylesterase activity // inferred from sequence or structural similarity /// 4091 // carboxylesterase activity // non-traceable author statement /// 3824 // catalytic activity // inferred from electronic annotation /// 4091 // carboxylesterase activity // inferred from sequence similarity	---	---	IPR002018 // Carboxylesterase, type B // 1.0E-126
6470	147669_at	-0.711887	0.920088	-8.71319	6.82e-10	1.45e-08	12.1904	FBgn0034717	CG5819	CG5819	CG5819	37547	---	7155 // cell adhesion // inferred from electronic annotation /// 19226 // transmission of nerve impulse // inferred from electronic annotation	---	IPR001611 // Leucine-rich repeat // 0.0049 /// IPR001611 // Leucine-rich repeat // 0.41 /// IPR001611 // Leucine-rich repeat // 0.46 /// IPR001611 // Leucine-rich repeat // 0.026 /// IPR001611 // Leucine-rich repeat // 0.25 /// IPR001611 // Leucine-rich repeat // 0.5 /// IPR001611 // Leucine-rich repeat // 0.01 /// IPR001611 // Leucine-rich repeat // 0.02 /// IPR001611 // Leucine-rich repeat // 0…
6896	148095_at	-0.72897	3.51322	-8.7044	6.98e-10	1.47e-08	12.1674	FBgn0035423	CG17737	CG17737	CG17737	38398	3743 // translation initiation factor activity // inferred from electronic annotation /// 5515 // protein binding // inferred from physical interaction	6412 // protein biosynthesis // non-traceable author statement /// 6413 // translational initiation // inferred from electronic annotation /// 6412 // protein biosynthesis // inferred from electronic annotation /// 6417 // regulation of protein biosynthesis // inferred from electronic annotation /// 6445 // regulation of translation // inferred from electronic annotation	---	IPR001950 // Translation initiation factor SUI1 // 2.2E-42
9667	150866_at	-0.86069	2.45097	-8.69223	7.2e-10	1.51e-08	12.1355	FBgn0039735	CG7911	CG7911	CG7911	43559	3676 // nucleic acid binding // inferred from electronic annotation	---	5634 // nucleus // inferred from electronic annotation	IPR004301 // Nucleoplasmin // 6.6E-80
13184	154383_at	-0.565433	2.74543	-8.68899	7.27e-10	1.52e-08	12.1271	FBgn0032721	CG10602	CG10602	CG10602	35146	4179 // membrane alanyl aminopeptidase activity // inferred from electronic annotation /// 4463 // leukotriene-A4 hydrolase activity // inferred from sequence or structural similarity /// 8237 // metallopeptidase activity // inferred from electronic annotation /// 8270 // zinc ion binding // inferred from electronic annotation /// 4463 // leukotriene-A4 hydrolase activity // inferred from sequenc…	6508 // proteolysis // inferred from electronic annotation /// 6952 // defense response // inferred from electronic annotation /// 7166 // cell surface receptor linked signal transduction // inferred from electronic annotation	---	IPR001930 // Peptidase M1, membrane alanine aminopeptidase // 4.6E-110 /// IPR001930 // Peptidase M1, membrane alanine aminopeptidase // 4.6E-110
4698	145897_at	-1.3239	2.99703	-8.68706	7.3e-10	1.53e-08	12.122	FBgn0031810	CG9511	CG9511	CG9511	33894	---	---	---	---
13473	154672_at	-0.741418	1.1771	-8.68682	7.31e-10	1.53e-08	12.1214	FBgn0025615	CG3024	torp4a	torp4a	31399	5524 // ATP binding // inferred from sequence or structural similarity /// 5524 // ATP binding // non-traceable author statement /// 51082 // unfolded protein binding // inferred from sequence or structural similarity /// 166 // nucleotide binding // inferred from electronic annotation /// 5524 // ATP binding // inferred from electronic annotation /// 51082 // unfolded protein binding // inferred…	6457 // protein folding // inferred from sequence or structural similarity /// 6457 // protein folding // non-traceable author statement /// 19221 // cytokine and chemokine mediated signaling pathway // inferred from electronic annotation /// 19226 // transmission of nerve impulse // inferred from electronic annotation /// 6457 // protein folding // inferred from electronic annotation /// 51085 /…	5788 // endoplasmic reticulum lumen // inferred from sequence or structural similarity /// 5788 // endoplasmic reticulum lumen // non-traceable author statement /// 5783 // endoplasmic reticulum // inferred from electronic annotation /// 5788 // endoplasmic reticulum lumen // inferred from sequence similarity	IPR010448 // Torsin // 1.0E-126
5429	146628_at	-0.684005	3.25685	-8.67624	7.51e-10	1.56e-08	12.0937	FBgn0033000	---	CG14464	CG14464	---	5515 // protein binding // inferred from physical interaction	---	---	---
4499	145698_at	-1.08134	1.5458	-8.66614	7.71e-10	1.6e-08	12.0673	FBgn0031517	CG15406	CG15406	CG15406	33542	5353 // fructose transporter activity // inferred from sequence or structural similarity /// 5215 // transporter activity // inferred from electronic annotation /// 5353 // fructose transporter activity // inferred from sequence similarity	5975 // carbohydrate metabolism // inferred from electronic annotation /// 8643 // carbohydrate transport // inferred from electronic annotation /// 6810 // transport // inferred from electronic annotation	16020 // membrane // inferred from electronic annotation /// 16021 // integral to membrane // inferred from electronic annotation	IPR005828 // General substrate transporter // 3.4E-31
11885	153084_at	-0.679345	2.48973	-8.65517	7.93e-10	1.64e-08	12.0385	FBgn0013467	CG18285	igl	igloo	36681	5516 // calmodulin binding // inferred from direct assay	---	---	IPR000048 // IQ calmodulin-binding region // 4.2E-6 /// IPR000048 // IQ calmodulin-binding region // 8.4E-6 /// IPR000048 // IQ calmodulin-binding region // 4.2E-6 /// IPR000048 // IQ calmodulin-binding region // 8.4E-6
8707	149906_i_at	-1.17593	1.19581	-8.64671	8.11e-10	1.67e-08	12.0164	FBgn0038243	CG8066	CG8066	CG8066	41766	4869 // cysteine protease inhibitor activity // inferred from sequence or structural similarity /// 5515 // protein binding // inferred from physical interaction /// 4869 // cysteine protease inhibitor activity // inferred from electronic annotation /// 4869 // cysteine protease inhibitor activity // inferred from sequence similarity	---	---	IPR000010 // Cysteine protease inhibitor // 9.8E-12
11238	152437_at	-0.740478	1.31415	-8.63874	8.27e-10	1.7e-08	11.9955	FBgn0064237	CG5154	Idgf5	Imaginal disc growth factor 5	37104	4568 // chitinase activity // inferred from sequence or structural similarity /// 8083 // growth factor activity // inferred from electronic annotation /// 8084 // imaginal disc growth factor activity // inferred from direct assay /// 16799 // hydrolase activity, hydrolyzing N-glycosyl compounds // inferred from electronic annotation /// 4553 // hydrolase activity, hydrolyzing O-glycosyl compound…	5976 // polysaccharide metabolism // inferred from electronic annotation /// 7165 // signal transduction // inferred from electronic annotation /// 7267 // cell-cell signaling // inferred from electronic annotation /// 7444 // imaginal disc development // inferred from direct assay /// 5975 // carbohydrate metabolism // inferred from electronic annotation /// 6032 // chitin catabolism // inferred…	5576 // extracellular region // non-traceable author statement	IPR001223 // Glycoside hydrolase, family 18 // 1.1E-81
12620	153819_at	-0.682136	2.50916	-8.63236	8.41e-10	1.73e-08	11.9787	FBgn0037137	CG7421	Nopp140	Nopp140	40433	---	17126 // nucleologenesis // inferred from sequence or structural similarity /// 17126 // nucleologenesis // inferred from sequence similarity	5730 // nucleolus // inferred from sequence or structural similarity /// 5730 // nucleolus // traceable author statement /// 5730 // nucleolus // inferred from sequence similarity	IPR007718 // SRP40, C-terminal // 5.3E-46
102	141301_at	-0.696452	2.70587	-8.63132	8.44e-10	1.73e-08	11.976	FBgn0004885	CG6863	tok	tolkin	42944	5509 // calcium ion binding // inferred from electronic annotation /// 8270 // zinc ion binding // inferred from electronic annotation /// 8533 // astacin activity // inferred from electronic annotation /// 17026 // procollagen C-endopeptidase activity // inferred from sequence or structural similarity /// 8237 // metallopeptidase activity // inferred from electronic annotation /// 17026 // proco…	6508 // proteolysis // inferred from electronic annotation /// 9950 // dorsal/ventral axis specification // inferred from electronic annotation	---	IPR001506 // Peptidase M12A, astacin // 4.0E-120 /// IPR006209 // EGF-like domain // 1.5E-8 /// IPR006209 // EGF-like domain // 1.6E-7 /// IPR000859 // CUB // 6.5E-34 /// IPR000859 // CUB // 9.0E-57 /// IPR000859 // CUB // 2.9E-46 /// IPR000859 // CUB // 1.8E-51 /// IPR000859 // CUB // 1.7E-32
1812	143011_at	-0.830856	3.2537	-8.63002	8.46e-10	1.74e-08	11.9726	FBgn0031220	CG4822	CG4822	CG4822	33170	166 // nucleotide binding // inferred from electronic annotation /// 5215 // transporter activity // inferred from sequence or structural similarity /// 5253 // anion channel activity // inferred from electronic annotation /// 5524 // ATP binding // inferred from electronic annotation /// 42626 // ATPase activity, coupled to transmembrane movement of substances // inferred from sequence or struct…	6629 // lipid metabolism // inferred from electronic annotation /// 6820 // anion transport // inferred from electronic annotation /// 6869 // lipid transport // inferred from electronic annotation	43190 // ATP-binding cassette (ABC) transporter complex // inferred from sequence or structural similarity /// 43190 // ATP-binding cassette (ABC) transporter complex // inferred from sequence similarity	IPR003439 // ABC transporter // 1.7E-41
11889	153088_at	-1.14273	4.84611	-8.62824	8.5e-10	1.74e-08	11.9679	FBgn0035770 /// FBgn0067936	CG8588	pst /// Dyakpst	pastrel /// pst	38818	---	7611 // learning and/or memory // inferred from mutant phenotype /// 8355 // olfactory learning // inferred from mutant phenotype	---	---
1212	142411_at	-0.752324	-0.278002	-8.62696	8.53e-10	1.74e-08	11.9645	FBgn0038794	CG17205	CG17205	CG17205	42420	---	---	---	---
591	141790_at	-0.905843	3.59747	-8.62264	8.63e-10	1.76e-08	11.9532	FBgn0011661	CG10701	Moe	Moesin	31816	3779 // actin binding // non-traceable author statement /// 5200 // structural constituent of cytoskeleton // inferred from electronic annotation /// 5515 // protein binding // inferred from physical interaction /// 8092 // cytoskeletal protein binding // inferred from sequence or structural similarity /// 3779 // actin binding // inferred from electronic annotation /// 5198 // structural molecul…	2009 // morphogenesis of an epithelium // traceable author statement /// 7010 // cytoskeleton organization and biogenesis // traceable author statement /// 7315 // pole plasm assembly // traceable author statement /// 7318 // pole plasm protein localization // traceable author statement /// 8104 // protein localization // traceable author statement /// 9952 // anterior/posterior pattern formation…	5737 // cytoplasm // non-traceable author statement /// 5856 // cytoskeleton // inferred from electronic annotation /// 5886 // plasma membrane // inferred from direct assay /// 5886 // plasma membrane // non-traceable author statement /// 5912 // adherens junction // non-traceable author statement /// 35003 // subapical complex // traceable author statement /// 45169 // fusome // inferred from d…	IPR000299 // Band 4.1 // 1.7E-125 /// IPR000798 // Ezrin/radixin/moesin ERM // 1.0E-126 /// IPR000798 // Ezrin/radixin/moesin ERM // 1.0E-126 /// IPR000299 // Band 4.1 // 6.8E-28 /// IPR000299 // Band 4.1 // 1.5E-89 /// IPR000798 // Ezrin/radixin/moesin ERM // 1.0E-126 /// IPR000299 // Band 4.1 // 6.8E-28 /// IPR000299 // Band 4.1 // 1.5E-89 /// IPR000798 // Ezrin/radixin/moesin ERM // 1.0E-126 /…
12159	153358_at	-0.584002	0.949497	-8.62135	8.66e-10	1.76e-08	11.9498	FBgn0023542	CG3460	Nmd3	Nonsense-mediated mRNA 3	31195	3729 // mRNA binding // inferred from sequence or structural similarity /// 5515 // protein binding // inferred from sequence or structural similarity /// 5515 // protein binding // inferred from physical interaction /// 8270 // zinc ion binding // inferred from electronic annotation /// 3729 // mRNA binding // inferred from sequence similarity /// 5515 // protein binding // inferred from sequenc…	55 // ribosomal large subunit export from nucleus // inferred from sequence or structural similarity /// 6398 // histone mRNA 3'-end processing // inferred from electronic annotation /// 55 // ribosomal large subunit export from nucleus // inferred from sequence similarity	---	IPR007064 // NMD3 family // 1.0E-126
8275	149474_at	-0.450674	1.09568	-8.619	8.71e-10	1.77e-08	11.9437	FBgn0037548	CG7900	CG7900	CG7900	40957	4040 // amidase activity // inferred from electronic annotation /// 17064 // fatty acid amide hydrolase activity // inferred from sequence or structural similarity /// 17064 // fatty acid amide hydrolase activity // inferred from sequence similarity	6807 // nitrogen compound metabolism // inferred from electronic annotation	---	IPR000120 // Amidase // 4.2E-61 /// IPR000120 // Amidase // 1.2E-13
4862	146061_at	-1.28142	1.23795	-8.61212	8.87e-10	1.8e-08	11.9256	FBgn0032088	CG13102	CG13102	CG13102	34228	---	---	---	---
13892	155091_at	-0.896	5.27019	-8.611	8.89e-10	1.8e-08	11.9226	FBgn0015766	CG10596	Msr-110	Msr-110	38629	---	---	---	---
2919	144118_at	-0.758302	2.56237	-8.60701	8.98e-10	1.82e-08	11.9122	FBgn0026088	CG14818	CG14818	CG14818	31147	5515 // protein binding // inferred from physical interaction	---	---	IPR005374 // Protein of unknown function UPF0184 // 2.0E-54
1524	142723_at	-1.12674	4.37781	-8.60597	9.01e-10	1.82e-08	11.9094	FBgn0010348	CG8385	Arf79F	ADP ribosylation factor 79F	40506	3924 // GTPase activity // inferred from sequence or structural similarity /// 3924 // GTPase activity // non-traceable author statement /// 5525 // GTP binding // inferred from sequence or structural similarity /// 5525 // GTP binding // non-traceable author statement /// 5515 // protein binding // inferred from physical interaction /// 166 // nucleotide binding // inferred from electronic annot…	6471 // protein amino acid ADP-ribosylation // inferred from sequence or structural similarity /// 6471 // protein amino acid ADP-ribosylation // non-traceable author statement /// 6886 // intracellular protein transport // inferred from electronic annotation /// 7155 // cell adhesion // inferred from mutant phenotype /// 7166 // cell surface receptor linked signal transduction // inferred from e…	5622 // intracellular // inferred from electronic annotation /// 5795 // Golgi stack // inferred from electronic annotation	IPR006689 // ARF/SAR superfamily // 1.0E-126
215	141414_at	-0.605076	2.20733	-8.59663	9.23e-10	1.86e-08	11.8849	FBgn0031428	CG9886	CG9886	CG9886	33431	16301 // kinase activity // inferred from electronic annotation /// 19200 // carbohydrate kinase activity // inferred from electronic annotation	5975 // carbohydrate metabolism // inferred from electronic annotation	---	IPR007835 // MOFRL // 1.3E-66
11471	152670_at	-0.602149	0.580333	-8.59704	9.22e-10	1.86e-08	11.886	FBgn0037561	CG9630	CG9630	CG9630	40974	3676 // nucleic acid binding // inferred from electronic annotation /// 4004 // ATP-dependent RNA helicase activity // inferred from sequence or structural similarity /// 5524 // ATP binding // inferred from electronic annotation /// 166 // nucleotide binding // inferred from electronic annotation /// 4386 // helicase activity // inferred from electronic annotation /// 8026 // ATP-dependent helic…	6139 // nucleobase, nucleoside, nucleotide and nucleic acid metabolism // inferred from electronic annotation	---	IPR001650 // Helicase, C-terminal // 6.1E-24 /// IPR001410 // DEAD/DEAH box helicase // 4.5E-65
11951	153150_at	-0.953731	2.90208	-8.59346	9.31e-10	1.87e-08	11.8765	FBgn0014427	CG11899	CG11899	CG11899	46391	4648 // phosphoserine transaminase activity // inferred from sequence or structural similarity /// 4648 // phosphoserine transaminase activity // non-traceable author statement /// 5515 // protein binding // inferred from physical interaction /// 8483 // transaminase activity // inferred from electronic annotation /// 4648 // phosphoserine transaminase activity // inferred from electronic annotat…	6564 // L-serine biosynthesis // non-traceable author statement /// 8615 // pyridoxine biosynthesis // non-traceable author statement /// 6564 // L-serine biosynthesis // inferred from electronic annotation /// 8152 // metabolism // inferred from electronic annotation /// 8652 // amino acid biosynthesis // inferred from electronic annotation	---	IPR000192 // Aminotransferase, class V // 1.6E-86
12014	153213_at	-0.644679	2.98862	-8.58711	9.46e-10	1.9e-08	11.8599	FBgn0037074	CG7324	CG7324	CG7324	40361	5097 // Rab GTPase activator activity // inferred from sequence or structural similarity /// 5515 // protein binding // inferred from physical interaction /// 5509 // calcium ion binding // inferred from electronic annotation /// 5097 // Rab GTPase activator activity // inferred from sequence similarity	74 // regulation of progression through cell cycle // inferred from electronic annotation /// 6886 // intracellular protein transport // inferred from electronic annotation /// 6887 // exocytosis // inferred from electronic annotation	---	IPR000195 // RabGAP/TBC domain // 1.3E-62 /// IPR004182 // GRAM domain // 4.4E-25 /// IPR004182 // GRAM domain // 1.9E-24
6762	147961_at	-0.684066	0.956282	-8.57542	9.75e-10	1.95e-08	11.8291	FBgn0053966	---	CG33966	CG33966	3885642	---	---	---	---
2265	143464_f_at	-1.97684	3.86708	-8.57439	9.78e-10	1.95e-08	11.8264	FBgn0004425	CG1179	LysB	Lysozyme B	38125	3796 // lysozyme activity // inferred from sequence or structural similarity /// 3796 // lysozyme activity // non-traceable author statement /// 3796 // lysozyme activity // inferred from sequence similarity	6960 // antimicrobial humoral response (sensu Protostomia) // non-traceable author statement /// 16998 // cell wall catabolism // inferred from electronic annotation	5576 // extracellular region // inferred from electronic annotation	IPR001916 // Glycoside hydrolase, family 22 // 1.3E-67
6270	147469_at	-0.908519	4.91683	-8.57407	9.79e-10	1.95e-08	11.8256	FBgn0034398	CG15098	CG15098	CG15098	37174	---	---	---	---
4952	146151_at	-0.855333	4.48009	-8.57045	9.88e-10	1.97e-08	11.816	FBgn0032237	CG5362	CG5362	CG5362	34414	30060 // L-malate dehydrogenase activity // inferred from sequence or structural similarity /// 4459 // L-lactate dehydrogenase activity // inferred from electronic annotation /// 16491 // oxidoreductase activity // inferred from electronic annotation /// 16615 // malate dehydrogenase activity // inferred from electronic annotation /// 30060 // L-malate dehydrogenase activity // inferred from ele…	6099 // tricarboxylic acid cycle // inferred from electronic annotation /// 6100 // tricarboxylic acid cycle intermediate metabolism // inferred from electronic annotation /// 6108 // malate metabolism // inferred from electronic annotation /// 6096 // glycolysis // inferred from electronic annotation	5829 // cytosol // inferred from sequence or structural similarity /// 5829 // cytosol // inferred from sequence similarity	IPR001236 // Lactate/malate dehydrogenase // 4.6E-51 /// IPR001236 // Lactate/malate dehydrogenase // 2.5E-33
11996	153195_at	-0.790314	2.83323	-8.56709	9.97e-10	1.98e-08	11.8072	FBgn0014930	CG2846	CG2846	CG2846	40936	8531 // riboflavin kinase activity // inferred from sequence or structural similarity /// 287 // magnesium ion binding // inferred from electronic annotation /// 8270 // zinc ion binding // inferred from electronic annotation /// 8531 // riboflavin kinase activity // inferred from electronic annotation /// 16301 // kinase activity // inferred from electronic annotation /// 16740 // transferase ac…	9231 // riboflavin biosynthesis // inferred from sequence or structural similarity /// 9231 // riboflavin biosynthesis // inferred from electronic annotation /// 9231 // riboflavin biosynthesis // inferred from sequence similarity	5737 // cytoplasm // inferred from sequence or structural similarity /// 5737 // cytoplasm // inferred from sequence similarity	IPR002606 // Riboflavin kinase / FAD synthetase // 2.3E-43
2439	143638_at	-0.722517	4.02947	-8.56405	1e-09	1.99e-08	11.7992	FBgn0011217	CG7425	eff	effete	41785	4840 // ubiquitin conjugating enzyme activity // inferred from genetic interaction /// 4840 // ubiquitin conjugating enzyme activity // inferred from sequence or structural similarity /// 4840 // ubiquitin conjugating enzyme activity // non-traceable author statement /// 4840 // ubiquitin conjugating enzyme activity // traceable author statement /// 5515 // protein binding // inferred from physic…	1745 // compound eye morphogenesis (sensu Endopterygota) // inferred from mutant phenotype /// 6512 // ubiquitin cycle // inferred from genetic interaction /// 6512 // ubiquitin cycle // inferred from sequence or structural similarity /// 7001 // chromosome organization and biogenesis (sensu Eukaryota) // inferred from mutant phenotype /// 7067 // mitosis // inferred from mutant phenotype /// 714…	---	IPR000608 // Ubiquitin-conjugating enzymes // 4.2E-81
12614	153813_at	-0.936895	0.4016	-8.56061	1.01e-09	2.01e-08	11.7901	FBgn0004463	CG8344	RpIII128	RNA polymerase III 128kD subunit	36289	3676 // nucleic acid binding // inferred from electronic annotation /// 3677 // DNA binding // inferred from electronic annotation /// 3899 // DNA-directed RNA polymerase activity // inferred from sequence or structural similarity /// 3899 // DNA-directed RNA polymerase activity // inferred from electronic annotation /// 8270 // zinc ion binding // inferred from electronic annotation /// 16740 //…	6366 // transcription from RNA polymerase II promoter // inferred from electronic annotation /// 6383 // transcription from RNA polymerase III promoter // inferred from sequence or structural similarity /// 6383 // transcription from RNA polymerase III promoter // non-traceable author statement /// 9299 // mRNA transcription // inferred from electronic annotation /// 6350 // transcription // infe…	5634 // nucleus // non-traceable author statement /// 5666 // DNA-directed RNA polymerase III complex // inferred from sequence or structural similarity /// 5634 // nucleus // inferred from electronic annotation /// 5666 // DNA-directed RNA polymerase III complex // inferred from sequence similarity	IPR007641 // RNA polymerase Rpb2, domain 7 // 8.0E-47 /// IPR007644 // RNA polymerase beta subunit // 7.4E-62 /// IPR007642 // RNA polymerase Rpb2, domain 2 // 1.7E-29 /// IPR007645 // RNA polymerase Rpb2, domain 3 // 9.9E-30 /// IPR007646 // RNA polymerase Rpb2, domain 4 // 2.0E-38 /// IPR007647 // RNA polymerase Rpb2, domain 5 // 2.4E-19 /// IPR007120 // RNA polymerase Rpb2, domain 6 // 1.0E-126
12224	153423_at	-0.902154	3.59991	-8.53674	1.08e-09	2.12e-08	11.7273	FBgn0011280	CG1668	Pbprp2	Pheromone-binding protein-related protein 2	33040	5550 // pheromone binding // inferred from sequence or structural similarity /// 5550 // pheromone binding // non-traceable author statement /// 8145 // phenylalkylamine binding // non-traceable author statement /// 5549 // odorant binding // inferred from electronic annotation /// 5550 // pheromone binding // inferred from sequence similarity	6810 // transport // inferred from electronic annotation	5576 // extracellular region // non-traceable author statement	IPR006170 // Pheromone/general odorant binding protein, PBP/GOBP // 1.6E-28
9513	150712_at	-0.78839	1.40243	-8.53285	1.09e-09	2.14e-08	11.717	FBgn0039486	CG6074	CG6074	CG6074	43264	4089 // carbonate dehydratase activity // inferred from sequence or structural similarity /// 8270 // zinc ion binding // inferred from electronic annotation /// 4089 // carbonate dehydratase activity // inferred from electronic annotation /// 4089 // carbonate dehydratase activity // inferred from sequence similarity	6730 // one-carbon compound metabolism // inferred from electronic annotation	---	IPR001148 // Carbonic anhydrase, eukaryotic // 3.8E-49 /// IPR001148 // Carbonic anhydrase, eukaryotic // 1.3E-49
12747	153946_at	-0.817516	3.92104	-8.53037	1.1e-09	2.15e-08	11.7105	FBgn0037358	CG2185	CG2185	CG2185	40695	5509 // calcium ion binding // inferred from sequence or structural similarity /// 5516 // calmodulin binding // inferred from electronic annotation /// 5509 // calcium ion binding // inferred from electronic annotation /// 5509 // calcium ion binding // inferred from sequence similarity	6886 // intracellular protein transport // inferred from electronic annotation /// 6887 // exocytosis // inferred from electronic annotation /// 7242 // intracellular signaling cascade // inferred from electronic annotation	---	IPR002048 // Calcium-binding EF-hand // 2.7E-7 /// IPR002048 // Calcium-binding EF-hand // 0.037
3112	144311_at	-0.844702	1.83424	-8.52496	1.11e-09	2.18e-08	11.6962	FBgn0041713	CG4182	yellow-c	yellow-c	34879	5515 // protein binding // inferred from physical interaction	---	---	IPR003534 // Major royal jelly protein // 1.0E-126
298	141497_at	-1.09885	1.39177	-8.51199	1.15e-09	2.25e-08	11.662	FBgn0025687	CG7144	CG7144	CG7144	34064	4754 // saccharopine dehydrogenase (NAD+, L-lysine-forming) activity // inferred from sequence or structural similarity /// 16491 // oxidoreductase activity // inferred from electronic annotation /// 4754 // saccharopine dehydrogenase (NAD+, L-lysine-forming) activity // inferred from sequence similarity	6118 // electron transport // inferred from electronic annotation /// 9063 // amino acid catabolism // inferred from electronic annotation	---	IPR007698 // Alanine dehydrogenase/PNT, C-terminal // 2.4E-51 /// IPR005097 // Saccharopine dehydrogenase // 1.0E-126 /// IPR007886 // Alanine dehydrogenase/PNT, N-terminal // 8.0E-49
7005	148204_at	-0.910508	0.445797	-8.48612	1.23e-09	2.39e-08	11.5937	FBgn0035581	CG17150	CG17150	CG17150	38586	166 // nucleotide binding // inferred from electronic annotation /// 3774 // motor activity // inferred from sequence or structural similarity /// 3777 // microtubule motor activity // inferred from electronic annotation /// 4197 // cysteine-type endopeptidase activity // inferred from electronic annotation /// 5200 // structural constituent of cytoskeleton // inferred from electronic annotation …	6508 // proteolysis // inferred from electronic annotation /// 6928 // cell motility // inferred from electronic annotation /// 7018 // microtubule-based movement // inferred from sequence or structural similarity /// 7018 // microtubule-based movement // inferred from sequence similarity	5875 // microtubule associated complex // inferred from sequence or structural similarity /// 30286 // dynein complex // inferred from sequence or structural similarity /// 5875 // microtubule associated complex // inferred from sequence similarity /// 30286 // dynein complex // inferred from sequence similarity	IPR004273 // Dynein heavy chain // 1.0E-126
11075	152274_at	-0.763849	2.14666	-8.47038	1.28e-09	2.48e-08	11.5521	FBgn0046302	CG10650	CG10650	CG10650	35162	16491 // oxidoreductase activity // inferred from electronic annotation /// 5515 // protein binding // inferred from physical interaction	8152 // metabolism // inferred from electronic annotation	---	---
6229	147428_at	-0.687086	1.93059	-8.45827	1.32e-09	2.53e-08	11.5201	FBgn0034326	CG18540	CG18540	CG18540	37097	---	---	---	IPR010512 // Protein of unknown function DUF1091 // 1.0E-126
10226	151425_at	-0.612179	0.427929	-8.45954	1.32e-09	2.53e-08	11.5234	FBgn0040964	CG18661	CG18661	CG18661	50438	---	---	---	IPR010342 // Protein of unknown function DUF938 // 1.0E-126
12144	153343_at	-1.32725	1.175	-8.45702	1.33e-09	2.54e-08	11.5167	FBgn0039509	CG3350	bigmax	bigmax	43293	3700 // transcription factor activity // inferred from sequence or structural similarity /// 3700 // transcription factor activity // non-traceable author statement /// 5515 // protein binding // inferred from physical interaction /// 30528 // transcription regulator activity // inferred from electronic annotation /// 3700 // transcription factor activity // inferred from sequence similarity	6350 // transcription // non-traceable author statement /// 6357 // regulation of transcription from RNA polymerase II promoter // inferred from electronic annotation /// 35071 // salivary gland cell autophagic cell death // inferred from expression pattern /// 45449 // regulation of transcription // inferred from sequence or structural similarity /// 48102 // autophagic cell death // inferred fr…	5634 // nucleus // inferred from sequence or structural similarity /// 5634 // nucleus // non-traceable author statement /// 5634 // nucleus // inferred from electronic annotation /// 5634 // nucleus // inferred from sequence similarity	IPR001092 // Basic helix-loop-helix dimerization domain bHLH // 2.3E-17
4532	145731_at	-1.3003	5.57256	-8.45334	1.34e-09	2.56e-08	11.507	FBgn0031561	CG16712	CG16712	CG16712	33592	4867 // serine-type endopeptidase inhibitor activity // inferred from sequence or structural similarity /// 4867 // serine-type endopeptidase inhibitor activity // inferred from electronic annotation /// 4867 // serine-type endopeptidase inhibitor activity // inferred from sequence similarity	---	---	IPR002223 // Pancreatic trypsin inhibitor (Kunitz) // 6.8E-23
11936	153135_at	-0.715848	2.23057	-8.45105	1.35e-09	2.57e-08	11.5009	FBgn0011764	CG12223	Dsp1	Dorsal switch protein 1	117294	3682 // chromatin binding // inferred from electronic annotation /// 3697 // single-stranded DNA binding // non-traceable author statement /// 3714 // transcription corepressor activity // non-traceable author statement /// 3677 // DNA binding // inferred from electronic annotation	6268 // DNA unwinding during replication // non-traceable author statement /// 6333 // chromatin assembly or disassembly // inferred from electronic annotation /// 6357 // regulation of transcription from RNA polymerase II promoter // inferred from electronic annotation /// 6355 // regulation of transcription, DNA-dependent // inferred from electronic annotation	785 // chromatin // inferred from electronic annotation /// 5634 // nucleus // non-traceable author statement /// 5634 // nucleus // inferred from electronic annotation /// 5694 // chromosome // inferred from electronic annotation	IPR000910 // HMG1/2 (high mobility group) box // 2.8E-13 /// IPR000910 // HMG1/2 (high mobility group) box // 1.1E-27 /// IPR000910 // HMG1/2 (high mobility group) box // 2.8E-13 /// IPR000910 // HMG1/2 (high mobility group) box // 1.1E-27 /// IPR000910 // HMG1/2 (high mobility group) box // 2.8E-13 /// IPR000910 // HMG1/2 (high mobility group) box // 1.1E-27
277	141476_at	-0.514476	1.59954	-8.44357	1.38e-09	2.62e-08	11.4811	FBgn0033905	CG18324	CG18324	CG18324	36568	5386 // carrier activity // inferred from sequence or structural similarity /// 5488 // binding // inferred from electronic annotation /// 5215 // transporter activity // inferred from electronic annotation /// 5386 // carrier activity // inferred from sequence similarity	6810 // transport // inferred from electronic annotation	5740 // mitochondrial envelope // inferred from sequence or structural similarity /// 5743 // mitochondrial inner membrane // inferred from electronic annotation /// 16020 // membrane // inferred from electronic annotation /// 16021 // integral to membrane // inferred from electronic annotation /// 5740 // mitochondrial envelope // inferred from sequence similarity	IPR001993 // Mitochondrial substrate carrier // 1.1E-15 /// IPR001993 // Mitochondrial substrate carrier // 2.9E-13 /// IPR001993 // Mitochondrial substrate carrier // 1.5E-26 /// IPR001993 // Mitochondrial substrate carrier // 2.7E-10 /// IPR001993 // Mitochondrial substrate carrier // 1.5E-26
517	141716_at	-0.556296	3.03009	-8.44003	1.39e-09	2.64e-08	11.4718	FBgn0022764	CG8815	Sin3A	Sin3A	36382	3682 // chromatin binding // inferred from electronic annotation /// 3700 // transcription factor activity // inferred from sequence or structural similarity /// 3702 // RNA polymerase II transcription factor activity // non-traceable author statement /// 3712 // transcription cofactor activity // non-traceable author statement /// 5524 // ATP binding // inferred from electronic annotation /// 16…	6357 // regulation of transcription from RNA polymerase II promoter // inferred from electronic annotation /// 7422 // peripheral nervous system development // traceable author statement /// 15986 // ATP synthesis coupled proton transport // inferred from electronic annotation /// 16481 // negative regulation of transcription // inferred from expression pattern /// 45449 // regulation of transcri…	785 // chromatin // inferred from direct assay /// 791 // euchromatin // traceable author statement /// 5634 // nucleus // inferred from direct assay /// 5634 // nucleus // inferred from sequence or structural similarity /// 5634 // nucleus // non-traceable author statement /// 16469 // proton-transporting two-sector ATPase complex // inferred from electronic annotation /// 16580 // Sin3 complex …	IPR003822 // Paired amphipathic helix // 1.8E-14 /// IPR003822 // Paired amphipathic helix // 3.1E-13 /// IPR003822 // Paired amphipathic helix // 3.7E-13
13684	154883_at	-0.616997	2.45748	-8.43578	1.4e-09	2.66e-08	11.4605	FBgn0035848	CG7979	CG7979	CG7979	38911	175 // 3'-5'-exoribonuclease activity // inferred from electronic annotation /// 3729 // mRNA binding // inferred from electronic annotation /// 8460 // dTDP-glucose 4,6-dehydratase activity // inferred from sequence or structural similarity /// 3723 // RNA binding // inferred from electronic annotation /// 3824 // catalytic activity // inferred from electronic annotation /// 51287 // NAD binding…	5975 // carbohydrate metabolism // inferred from electronic annotation /// 6396 // RNA processing // inferred from electronic annotation /// 9225 // nucleotide-sugar metabolism // inferred from electronic annotation	---	IPR001509 // NAD-dependent epimerase/dehydratase // 2.8E-26
11614	152813_at	-0.708083	1.46848	-8.4228	1.45e-09	2.74e-08	11.4262	FBgn0031800	CG9497	CG9497	CG9497	33884	16301 // kinase activity // inferred from electronic annotation /// 16740 // transferase activity // inferred from electronic annotation	---	---	IPR004119 // Protein of unknown function DUF227 // 1.8E-85
11335	152534_at	-1.0502	3.57501	-8.4218	1.46e-09	2.75e-08	11.4235	FBgn0032889	CG9331	CG9331	CG9331	35347	16614 // oxidoreductase activity, acting on CH-OH group of donors // inferred from sequence or structural similarity /// 16616 // oxidoreductase activity, acting on the CH-OH group of donors, NAD or NADP as acceptor // inferred from electronic annotation /// 51287 // NAD binding // inferred from electronic annotation /// 16614 // oxidoreductase activity, acting on CH-OH group of donors // inferre…	5975 // carbohydrate metabolism // inferred from electronic annotation /// 6564 // L-serine biosynthesis // inferred from electronic annotation /// 8652 // amino acid biosynthesis // inferred from electronic annotation /// 8152 // metabolism // inferred from electronic annotation	---	IPR006140 // D-isomer specific 2-hydroxyacid dehydrogenase, NAD binding domain // 1.5E-72 /// IPR006139 // D-isomer specific 2-hydroxyacid dehydrogenase, catalytic domain // 1.1E-19 /// IPR006140 // D-isomer specific 2-hydroxyacid dehydrogenase, NAD binding domain // 1.5E-72 /// IPR006139 // D-isomer specific 2-hydroxyacid dehydrogenase, catalytic domain // 1.1E-19 /// IPR006140 // D-isomer speci…
546	141745_at	-0.89978	4.50125	-8.40146	1.54e-09	2.88e-08	11.3696	FBgn0032482 /// FBgn0068101	CG5547	Pect /// DyakPect	Phosphoethanolamine cytidylyltransferase /// Pect	34716	4306 // ethanolamine-phosphate cytidylyltransferase activity // inferred from sequence or structural similarity /// 16779 // nucleotidyltransferase activity // inferred from electronic annotation /// 4306 // ethanolamine-phosphate cytidylyltransferase activity // inferred from sequence similarity	6644 // phospholipid metabolism // inferred from electronic annotation /// 9058 // biosynthesis // inferred from electronic annotation /// 42439 // ethanolamine and derivative metabolism // non-traceable author statement	---	IPR004820 // Cytidylyltransferase // 5.3E-29 /// IPR004820 // Cytidylyltransferase // 1.3E-18 /// IPR004820 // Cytidylyltransferase // 1.3E-18 /// IPR004820 // Cytidylyltransferase // 1.3E-18 /// IPR004820 // Cytidylyltransferase // 1.3E-18
580	141779_at	-0.680789	1.19264	-8.38445	1.61e-09	3.01e-08	11.3244	FBgn0004512	CG3879	Mdr49	Multi drug resistance 49	36428	166 // nucleotide binding // inferred from electronic annotation /// 5524 // ATP binding // inferred from electronic annotation /// 15239 // multidrug transporter activity // inferred from sequence or structural similarity /// 15239 // multidrug transporter activity // non-traceable author statement /// 42623 // ATPase activity, coupled // inferred from sequence or structural similarity /// 42626…	6855 // multidrug transport // non-traceable author statement /// 6858 // extracellular transport // inferred from electronic annotation /// 6952 // defense response // inferred from electronic annotation /// 9636 // response to toxin // inferred from electronic annotation /// 15893 // drug transport // inferred from sequence or structural similarity /// 6810 // transport // inferred from electro…	5887 // integral to plasma membrane // non-traceable author statement /// 16020 // membrane // inferred from electronic annotation /// 16021 // integral to membrane // inferred from electronic annotation	IPR001140 // ABC transporter, transmembrane region // 5.9E-58 /// IPR001140 // ABC transporter, transmembrane region // 3.0E-76 /// IPR003439 // ABC transporter // 4.9E-68 /// IPR003439 // ABC transporter // 2.2E-58
2462	143661_at	-0.591812	0.859319	-8.3767	1.64e-09	3.07e-08	11.3038	FBgn0011556	CG12387	Try	Trypsin	36216	4263 // chymotrypsin activity // inferred from electronic annotation /// 4295 // trypsin activity // inferred from sequence or structural similarity /// 4295 // trypsin activity // non-traceable author statement /// 5515 // protein binding // inferred from physical interaction /// 4252 // serine-type endopeptidase activity // inferred from electronic annotation /// 4295 // trypsin activity // inf…	6508 // proteolysis // non-traceable author statement /// 6508 // proteolysis // inferred from electronic annotation	5576 // extracellular region // non-traceable author statement	IPR001254 // Peptidase S1, chymotrypsin // 3.5E-74
6192	147391_at	-0.519164	0.585909	-8.3714	1.66e-09	3.11e-08	11.2898	FBgn0034262	CG14485	swi2	swi2	37010	---	7242 // intracellular signaling cascade // inferred from sequence or structural similarity /// 35073 // pupariation // inferred from sequence or structural similarity /// 35075 // response to ecdysone // inferred from sequence or structural similarity /// 7242 // intracellular signaling cascade // inferred from sequence similarity /// 35073 // pupariation // inferred from sequence similarity /// …	---	IPR001611 // Leucine-rich repeat // 0.68 /// IPR001611 // Leucine-rich repeat // 0.5 /// IPR001611 // Leucine-rich repeat // 0.25 /// IPR003903 // Ubiquitin interacting motif // 0.018
1754	142953_at	-0.641082	0.846451	-8.36747	1.68e-09	3.12e-08	11.2793	FBgn0030774	CG9675	CG9675	CG9675	32648	4252 // serine-type endopeptidase activity // non-traceable author statement /// 4263 // chymotrypsin activity // inferred from electronic annotation /// 4295 // trypsin activity // inferred from electronic annotation /// 5515 // protein binding // inferred from physical interaction /// 4252 // serine-type endopeptidase activity // inferred from electronic annotation	6508 // proteolysis // inferred from electronic annotation	---	IPR001254 // Peptidase S1, chymotrypsin // 4.2E-44
6450	147649_at	-0.612244	0.0929066	-8.36709	1.68e-09	3.12e-08	11.2783	FBgn0050405	CG33227	CG33227	CG33227	2768861	---	---	---	IPR000859 // CUB // 4.8E-11
5939	147138_at	-0.501121	0.304067	-8.35454	1.74e-09	3.21e-08	11.245	FBgn0033817	CG4688	CG4688	CG4688	36467	4364 // glutathione transferase activity // inferred from sequence or structural similarity /// 16740 // transferase activity // inferred from electronic annotation /// 4364 // glutathione transferase activity // inferred from sequence similarity	6952 // defense response // inferred from electronic annotation /// 9636 // response to toxin // inferred from electronic annotation	---	IPR004046 // Glutathione S-transferase, C-terminal // 3.0E-6 /// IPR004045 // Glutathione S-transferase, N-terminal // 4.3E-17
10816	152015_at	-1.47035	7.41592	-8.3386	1.81e-09	3.34e-08	11.2026	FBgn0010019	CG3972	Cyp4g1	Cytochrome P450-4g1	30986	4497 // monooxygenase activity // inferred from electronic annotation /// 16491 // oxidoreductase activity // inferred from electronic annotation /// 5506 // iron ion binding // inferred from electronic annotation /// 20037 // heme binding // inferred from electronic annotation /// 46872 // metal ion binding // inferred from electronic annotation	6118 // electron transport // inferred from electronic annotation	5792 // microsome // non-traceable author statement /// 16020 // membrane // non-traceable author statement /// 5783 // endoplasmic reticulum // inferred from electronic annotation /// 5792 // microsome // inferred from electronic annotation /// 16020 // membrane // inferred from electronic annotation	IPR001128 // Cytochrome P450 // 2.3E-94
12529	153728_at	-0.686696	2.77892	-8.31796	1.91e-09	3.51e-08	11.1476	FBgn0012037 /// FBgn0082762	CG8827	Ance /// DsimAnce	Angiotensin converting enzyme /// Ance	34805	4246 // peptidyl-dipeptidase A activity // inferred from direct assay /// 4246 // peptidyl-dipeptidase A activity // non-traceable author statement /// 4246 // peptidyl-dipeptidase A activity // traceable author statement /// 8241 // peptidyl-dipeptidase activity // inferred from sequence or structural similarity /// 8270 // zinc ion binding // non-traceable author statement /// 4180 // carboxype…	6508 // proteolysis // inferred from electronic annotation /// 7289 // spermatid nuclear differentiation // inferred from mutant phenotype /// 7291 // sperm individualization // inferred from mutant phenotype /// 46698 // metamorphosis (sensu Insecta) // inferred from expression pattern	5576 // extracellular region // non-traceable author statement /// 16020 // membrane // inferred from electronic annotation	IPR001548 // Peptidase M2, peptidyl-dipeptidase A // 1.0E-126
1002	142201_at	-1.36727	4.10932	-8.31709	1.92e-09	3.51e-08	11.1453	FBgn0034663	CG4363	CG4363	CG4363	37488	---	---	---	IPR008472 // Protein of unknown function DUF753 // 4.9E-74
7929	149128_at	-0.632954	1.59481	-8.3018	2e-09	3.65e-08	11.1046	FBgn0036993	CG5910	CG5910	CG5910	40264	16773 // phosphotransferase activity, alcohol group as acceptor // inferred from electronic annotation	---	---	---
2414	143613_at	-0.850121	2.39596	-8.29821	2.02e-09	3.68e-08	11.095	FBgn0010401	CG3250	Os-C	Os-C	40942	5550 // pheromone binding // non-traceable author statement /// 5515 // protein binding // inferred from physical interaction	---	---	---
2079	143278_at	-0.494144	1.04421	-8.2932	2.04e-09	3.72e-08	11.0817	---	CG13399 /// CG10890	---	---	---	14 // single-stranded DNA specific endodeoxyribonuclease activity // inferred from sequence or structural similarity /// 3677 // DNA binding // inferred from electronic annotation /// 46982 // protein heterodimerization activity // inferred from physical interaction /// 4518 // nuclease activity // inferred from electronic annotation /// 3697 // single-stranded DNA binding // inferred from electr…	6284 // base-excision repair // inferred from sequence or structural similarity /// 6289 // nucleotide-excision repair // non-traceable author statement /// 42766 // nucleosome mobilization // inferred from direct assay /// 6281 // DNA repair // inferred from electronic annotation /// 6289 // nucleotide-excision repair // inferred from electronic annotation	8623 // chromatin accessibility complex // inferred from direct assay /// 8623 // chromatin accessibility complex // inferred from physical interaction /// 8623 // chromatin accessibility complex // non-traceable author statement /// 8623 // chromatin accessibility complex // traceable author statement /// 5634 // nucleus // inferred from electronic annotation /// 5622 // intracellular // inferre…	IPR006086 // XPG I domain // 1.6E-38 /// IPR003903 // Ubiquitin interacting motif // 0.0033 /// IPR006085 // XPG N-terminal // 1.2E-40
1234	142433_at	-0.740219	1.22201	-8.2914	2.05e-09	3.73e-08	11.0769	FBgn0035082	CG2811	CG2811	CG2811	37988	---	---	---	IPR005347 // Protein of unknown function UPF0131 // 2.1E-67
13988	AFFX-Dros-GAPDH_3_at	-0.974415	4.64258	-8.2899	2.06e-09	3.74e-08	11.0729	---	---	---	---	---	166 // nucleotide binding // inferred from electronic annotation /// 3676 // nucleic acid binding // inferred from electronic annotation /// 3677 // DNA binding // inferred from electronic annotation /// 3723 // RNA binding // inferred from electronic annotation /// 3743 // translation initiation factor activity // inferred from electronic annotation /// 4386 // helicase activity // inferred from…	381 // regulation of alternative nuclear mRNA splicing, via spliceosome // inferred from mutant phenotype /// 6412 // protein biosynthesis // inferred from electronic annotation /// 2168 // larval development (sensu Insecta) // traceable author statement /// 7446 // imaginal disc growth // traceable author statement	---	---
11514	152713_at	-0.64366	2.30104	-8.28522	2.09e-09	3.78e-08	11.0604	FBgn0037697	CG9363	CG9363	CG9363	41133	4364 // glutathione transferase activity // inferred from sequence or structural similarity /// 16034 // maleylacetoacetate isomerase activity // inferred from sequence or structural similarity /// 16740 // transferase activity // inferred from electronic annotation /// 5515 // protein binding // inferred from physical interaction /// 3824 // catalytic activity // inferred from electronic annotat…	6559 // L-phenylalanine catabolism // inferred from sequence or structural similarity /// 6572 // tyrosine catabolism // inferred from sequence or structural similarity /// 6559 // L-phenylalanine catabolism // inferred from electronic annotation /// 6572 // tyrosine catabolism // inferred from electronic annotation /// 9072 // aromatic amino acid family metabolism // inferred from electronic ann…	5737 // cytoplasm // inferred from sequence or structural similarity /// 5737 // cytoplasm // inferred from electronic annotation /// 5737 // cytoplasm // inferred from sequence similarity	IPR004046 // Glutathione S-transferase, C-terminal // 2.1E-5 /// IPR004045 // Glutathione S-transferase, N-terminal // 4.4E-17 /// IPR004046 // Glutathione S-transferase, C-terminal // 2.1E-5 /// IPR004045 // Glutathione S-transferase, N-terminal // 4.4E-17 /// IPR004046 // Glutathione S-transferase, C-terminal // 2.1E-5 /// IPR004045 // Glutathione S-transferase, N-terminal // 4.4E-17
10894	152093_at	-0.770768	4.44612	-8.28415	2.09e-09	3.78e-08	11.0575	---	CG31919	---	---	---	---	---	---	IPR002110 // Ankyrin // 9.4E-10 /// IPR002110 // Ankyrin // 3.3E-10 /// IPR002110 // Ankyrin // 1.1E-5
12044	153243_at	-0.6065	2.44933	-8.27089	2.17e-09	3.89e-08	11.0221	FBgn0010602	CG3018	lwr	lesswright	33226	4840 // ubiquitin conjugating enzyme activity // inferred from electronic annotation /// 5515 // protein binding // inferred from physical interaction /// 16874 // ligase activity // inferred from electronic annotation /// 19949 // SUMO conjugating enzyme activity // inferred from genetic interaction /// 19949 // SUMO conjugating enzyme activity // inferred from physical interaction /// 19949 // …	6464 // protein modification // inferred from genetic interaction /// 6464 // protein modification // inferred from physical interaction /// 6512 // ubiquitin cycle // inferred from electronic annotation /// 6606 // protein import into nucleus // inferred from mutant phenotype /// 6606 // protein import into nucleus // inferred from physical interaction /// 7143 // female meiosis // inferred from…	5634 // nucleus // inferred from direct assay	IPR000608 // Ubiquitin-conjugating enzymes // 3.3E-70
9762	150961_at	-0.725131	-0.187802	-8.267	2.19e-09	3.93e-08	11.0118	FBgn0011224	CG31000	heph	hephaestus	48571	3729 // mRNA binding // inferred from sequence or structural similarity /// 8187 // poly-pyrimidine tract binding // inferred from sequence or structural similarity /// 8187 // poly-pyrimidine tract binding // non-traceable author statement /// 166 // nucleotide binding // inferred from electronic annotation /// 3676 // nucleic acid binding // inferred from electronic annotation /// 3723 // RNA b…	398 // nuclear mRNA splicing, via spliceosome // inferred from sequence or structural similarity /// 7219 // Notch signaling pathway // inferred from mutant phenotype /// 7286 // spermatid development // inferred from mutant phenotype /// 8586 // wing vein morphogenesis // inferred from mutant phenotype /// 8587 // wing margin morphogenesis // inferred from mutant phenotype /// 6397 // mRNA proce…	5681 // spliceosome complex // inferred from electronic annotation /// 5634 // nucleus // inferred from electronic annotation	IPR000504 // RNA-binding region RNP-1 (RNA recognition motif) // 1.1E-6 /// IPR000504 // RNA-binding region RNP-1 (RNA recognition motif) // 7.8E-8 /// IPR000504 // RNA-binding region RNP-1 (RNA recognition motif) // 3.7E-8
4544	145743_at	-0.855611	1.56352	-8.25778	2.24e-09	4.01e-08	10.9872	FBgn0031579	CG15422	CG15422	CG15422	33615	---	---	---	---
13211	154410_at	-0.682701	2.63121	-8.25585	2.25e-09	4.02e-08	10.982	FBgn0035147	CG12030	CG12030	CG12030	38076	3978 // UDP-glucose 4-epimerase activity // inferred from sequence or structural similarity /// 3978 // UDP-glucose 4-epimerase activity // non-traceable author statement /// 5515 // protein binding // inferred from physical interaction /// 42802 // identical protein binding // inferred from physical interaction /// 3824 // catalytic activity // inferred from electronic annotation /// 3978 // UDP…	6012 // galactose metabolism // non-traceable author statement /// 9225 // nucleotide-sugar metabolism // inferred from electronic annotation /// 5975 // carbohydrate metabolism // inferred from electronic annotation /// 6012 // galactose metabolism // inferred from electronic annotation	---	IPR001509 // NAD-dependent epimerase/dehydratase // 1.0E-126 /// IPR001509 // NAD-dependent epimerase/dehydratase // 3.0E-125
4421	145620_at	-0.58892	0.787226	-8.23231	2.4e-09	4.27e-08	10.9191	FBgn0031389	CG4259	CG4259	CG4259	33385	4252 // serine-type endopeptidase activity // non-traceable author statement /// 4263 // chymotrypsin activity // inferred from electronic annotation /// 4295 // trypsin activity // inferred from electronic annotation /// 4252 // serine-type endopeptidase activity // inferred from electronic annotation	6508 // proteolysis // inferred from electronic annotation	---	IPR001254 // Peptidase S1, chymotrypsin // 4.4E-24
5940	147139_at	-0.858599	3.19209	-8.22275	2.46e-09	4.37e-08	10.8936	FBgn0033821	CG10799	CG10799	CG10799	36472	---	---	---	---
11554	152753_at	-0.692319	0.940636	-8.21445	2.52e-09	4.47e-08	10.8713	FBgn0027103	CG6159	sec10	sec10	42863	5515 // protein binding // inferred from physical interaction	6886 // intracellular protein transport // inferred from electronic annotation /// 7269 // neurotransmitter secretion // non-traceable author statement /// 16080 // synaptic vesicle targeting // non-traceable author statement /// 16081 // synaptic vesicle docking during exocytosis // non-traceable author statement /// 16192 // vesicle-mediated transport // inferred from sequence or structural sim…	145 // exocyst // inferred from sequence or structural similarity /// 145 // exocyst // non-traceable author statement /// 5737 // cytoplasm // inferred from electronic annotation /// 145 // exocyst // inferred from sequence similarity	IPR009976 // Exocyst complex component Sec10 // 1.0E-126
11114	152313_at	-1.04448	2.38909	-8.21241	2.53e-09	4.48e-08	10.8659	FBgn0015714	CG10241	Cyp6a17	Cyp6a17	45556	4497 // monooxygenase activity // inferred from electronic annotation /// 16491 // oxidoreductase activity // inferred from electronic annotation /// 5506 // iron ion binding // inferred from electronic annotation /// 20037 // heme binding // inferred from electronic annotation /// 46872 // metal ion binding // inferred from electronic annotation	6118 // electron transport // inferred from electronic annotation /// 8202 // steroid metabolism // inferred from electronic annotation	5792 // microsome // non-traceable author statement /// 16020 // membrane // non-traceable author statement /// 5783 // endoplasmic reticulum // inferred from electronic annotation /// 5792 // microsome // inferred from electronic annotation /// 16020 // membrane // inferred from electronic annotation	IPR001128 // Cytochrome P450 // 8.8E-117
13800	154999_at	-0.499847	1.77854	-8.2034	2.59e-09	4.58e-08	10.8418	FBgn0011598	CG17161	grp	grapes	34993	4672 // protein kinase activity // inferred from sequence or structural similarity /// 4672 // protein kinase activity // non-traceable author statement /// 4674 // protein serine/threonine kinase activity // inferred from sequence or structural similarity /// 4674 // protein serine/threonine kinase activity // traceable author statement /// 4702 // receptor signaling protein serine/threonine kin…	75 // cell cycle checkpoint // inferred from sequence or structural similarity /// 75 // cell cycle checkpoint // traceable author statement /// 77 // DNA damage checkpoint // inferred from mutant phenotype /// 77 // DNA damage checkpoint // inferred from sequence or structural similarity /// 77 // DNA damage checkpoint // traceable author statement /// 1700 // embryonic development (sensu Insect…	5634 // nucleus // inferred from direct assay /// 5634 // nucleus // inferred from electronic annotation	IPR000719 // Protein kinase // 1.1E-69 /// IPR000719 // Protein kinase // 3.4E-46
11170	152369_at	-1.39087	3.60346	-8.18121	2.75e-09	4.84e-08	10.7823	FBgn0032049	CG13095	CG13095	CG13095	34182	4190 // aspartic-type endopeptidase activity // inferred from sequence or structural similarity /// 4194 // pepsin A activity // inferred from electronic annotation /// 4190 // aspartic-type endopeptidase activity // inferred from electronic annotation /// 8233 // peptidase activity // inferred from electronic annotation /// 16787 // hydrolase activity // inferred from electronic annotation /// 4…	6508 // proteolysis // inferred from electronic annotation	---	IPR001461 // Peptidase A1, pepsin // 1.0E-126
12197	153396_at	-0.779827	3.02258	-8.17732	2.77e-09	4.88e-08	10.7719	FBgn0023023	CG1411	CRMP	Collapsin Response Mediator Protein	40675	4157 // dihydropyrimidinase activity // inferred from sequence or structural similarity /// 4157 // dihydropyrimidinase activity // non-traceable author statement /// 16787 // hydrolase activity // inferred from electronic annotation /// 4157 // dihydropyrimidinase activity // inferred from electronic annotation /// 4157 // dihydropyrimidinase activity // inferred from sequence similarity	6139 // nucleobase, nucleoside, nucleotide and nucleic acid metabolism // inferred from electronic annotation	---	IPR006680 // Amidohydrolase // 6.4E-12 /// IPR006680 // Amidohydrolase // 3.1E-9
2373	143572_at	-0.615962	0.137441	-8.16373	2.88e-09	5.04e-08	10.7355	FBgn0005670	CG3656	Cyp4d1	Cytochrome P450-4d1	31188	4497 // monooxygenase activity // inferred from electronic annotation /// 16491 // oxidoreductase activity // inferred from electronic annotation /// 5506 // iron ion binding // inferred from electronic annotation /// 20037 // heme binding // inferred from electronic annotation /// 46872 // metal ion binding // inferred from electronic annotation	6118 // electron transport // inferred from electronic annotation /// 8202 // steroid metabolism // inferred from electronic annotation	5792 // microsome // non-traceable author statement /// 16020 // membrane // non-traceable author statement /// 5783 // endoplasmic reticulum // inferred from electronic annotation /// 5792 // microsome // inferred from electronic annotation /// 16020 // membrane // inferred from electronic annotation	IPR001128 // Cytochrome P450 // 1.0E-126 /// IPR001128 // Cytochrome P450 // 1.0E-126
6857	148056_at	-0.970506	0.71141	-8.157	2.93e-09	5.13e-08	10.7174	FBgn0035358	CG14949	CG14949	CG14949	38328	---	---	---	---
4899	146098_at	-0.582505	0.989392	-8.15624	2.93e-09	5.13e-08	10.7154	FBgn0015393	CG3949	hoip	hoi-polloi	44173	3729 // mRNA binding // inferred from sequence or structural similarity /// 3735 // structural constituent of ribosome // inferred from electronic annotation /// 5515 // protein binding // inferred from physical interaction /// 5096 // GTPase activator activity // inferred from electronic annotation /// 5488 // binding // inferred from electronic annotation /// 3729 // mRNA binding // inferred fr…	398 // nuclear mRNA splicing, via spliceosome // inferred from sequence or structural similarity /// 6412 // protein biosynthesis // inferred from electronic annotation /// 7399 // nervous system development // inferred from mutant phenotype /// 7422 // peripheral nervous system development // traceable author statement /// 132 // establishment of mitotic spindle orientation // inferred from muta…	5634 // nucleus // non-traceable author statement /// 5681 // spliceosome complex // inferred from sequence or structural similarity /// 5840 // ribosome // inferred from electronic annotation /// 30532 // small nuclear ribonucleoprotein complex // inferred from sequence or structural similarity /// 5634 // nucleus // inferred from electronic annotation /// 30529 // ribonucleoprotein complex // i…	IPR004038 // Ribosomal protein L7Ae/L30e/S12e/Gadd45 // 1.5E-36
12227	153426_at	-0.65696	0.0106373	-8.1513	2.97e-09	5.19e-08	10.7021	FBgn0039612	CG14523	CG14523	CG14523	43411	4222 // metalloendopeptidase activity // inferred from sequence or structural similarity /// 4245 // neprilysin activity // inferred from electronic annotation /// 4222 // metalloendopeptidase activity // inferred from sequence similarity	6508 // proteolysis // inferred from electronic annotation	16020 // membrane // inferred from electronic annotation /// 16021 // integral to membrane // inferred from electronic annotation	IPR008753 // Peptidase M13 // 9.2E-5 /// IPR000718 // Peptidase M13, neprilysin // 6.0E-17
10781	151980_at	-1.14412	1.52305	-8.14107	3.06e-09	5.32e-08	10.6747	FBgn0035620	CG5150	CG5150	CG5150	38633	4035 // alkaline phosphatase activity // inferred from sequence or structural similarity /// 19204 // nucleotide phosphatase activity // inferred from electronic annotation /// 4035 // alkaline phosphatase activity // inferred from sequence similarity	1501 // skeletal development // inferred from electronic annotation /// 7498 // mesoderm development // inferred from electronic annotation /// 8152 // metabolism // inferred from electronic annotation	---	IPR001952 // Alkaline phosphatase // 2.5E-84
13123	154322_at	-0.788845	2.28337	-8.13462	3.11e-09	5.4e-08	10.6574	FBgn0035872	CG7185	CG7185	CG7185	38937	3729 // mRNA binding // inferred from sequence or structural similarity /// 5515 // protein binding // inferred from physical interaction /// 166 // nucleotide binding // inferred from electronic annotation /// 3676 // nucleic acid binding // inferred from electronic annotation /// 3729 // mRNA binding // inferred from sequence similarity	381 // regulation of alternative nuclear mRNA splicing, via spliceosome // inferred from mutant phenotype /// 6379 // mRNA cleavage // inferred from sequence or structural similarity /// 6379 // mRNA cleavage // inferred from sequence similarity	5634 // nucleus // Unknown /// 5849 // mRNA cleavage factor complex // inferred from sequence or structural similarity /// 5634 // nucleus // inferred from curator /// 5849 // mRNA cleavage factor complex // inferred from sequence similarity	IPR000504 // RNA-binding region RNP-1 (RNA recognition motif) // 3.1E-9
11157	152356_at	-0.557403	1.54788	-8.1308	3.14e-09	5.45e-08	10.6471	FBgn0052412	CG32412	CG32412	CG32412	38663	8233 // peptidase activity // inferred from electronic annotation /// 16603 // glutaminyl-peptide cyclotransferase activity // inferred from sequence or structural similarity /// 16603 // glutaminyl-peptide cyclotransferase activity // inferred from sequence similarity	6508 // proteolysis // inferred from electronic annotation /// 8652 // amino acid biosynthesis // inferred from electronic annotation	---	IPR005191 // Peptidase M28, glutaminyl cyclase // 1.0E-126
11057	152256_at	-0.631658	0.761075	-8.12732	3.17e-09	5.49e-08	10.6377	FBgn0033289	CG2121	CG2121	CG2121	35814	---	6936 // muscle contraction // inferred from electronic annotation	---	---
12200	153399_at	-0.942715	2.22667	-8.12737	3.17e-09	5.49e-08	10.6379	FBgn0037108	CG11306	CG11306	CG11306	40402	26 // alpha-1,2-mannosyltransferase activity // inferred from sequence or structural similarity /// 8318 // protein prenyltransferase activity // inferred from electronic annotation /// 26 // alpha-1,2-mannosyltransferase activity // inferred from sequence similarity	5976 // polysaccharide metabolism // inferred from electronic annotation /// 6486 // protein amino acid glycosylation // inferred from electronic annotation /// 18346 // protein amino acid prenylation // inferred from electronic annotation /// 9058 // biosynthesis // inferred from electronic annotation	---	IPR001296 // Glycosyl transferase, group 1 // 9.3E-22
8007	149206_at	-0.828535	1.7268	-8.12388	3.2e-09	5.53e-08	10.6285	FBgn0037126	CG14567	CG14567	CG14567	40420	---	---	---	---
13827	155026_at	-0.483811	1.2104	-8.08864	3.51e-09	6.05e-08	10.5337	FBgn0030612	CG5599	CG5599	CG5599	32441	4147 // dihydrolipoamide branched chain acyltransferase activity // inferred from sequence or structural similarity /// 5515 // protein binding // inferred from electronic annotation /// 16407 // acetyltransferase activity // inferred from electronic annotation /// 16491 // oxidoreductase activity // inferred from electronic annotation /// 5515 // protein binding // inferred from physical interac…	6099 // tricarboxylic acid cycle // inferred from sequence or structural similarity /// 8152 // metabolism // inferred from electronic annotation /// 6099 // tricarboxylic acid cycle // inferred from sequence similarity	9353 // oxoglutarate dehydrogenase complex (sensu Eukaryota) // inferred from sequence or structural similarity /// 9353 // oxoglutarate dehydrogenase complex (sensu Eukaryota) // inferred from sequence similarity	IPR004167 // E3 binding // 1.2E-21 /// IPR001078 // Catalytic domain of components of various dehydrogenase complexes // 3.7E-114 /// IPR000089 // Biotin/lipoyl attachment // 7.8E-23
13027	154226_at	-0.624436	4.15574	-8.08168	3.58e-09	6.14e-08	10.515	FBgn0011760	CG6998	ctp	cut up	31405	3777 // microtubule motor activity // non-traceable author statement /// 5200 // structural constituent of cytoskeleton // inferred from electronic annotation /// 42623 // ATPase activity, coupled // inferred from sequence or structural similarity /// 5515 // protein binding // inferred from physical interaction /// 3774 // motor activity // inferred from electronic annotation /// 3777 // microtu…	6403 // RNA localization // inferred from electronic annotation /// 6886 // intracellular protein transport // inferred from electronic annotation /// 7018 // microtubule-based movement // inferred from sequence or structural similarity /// 7049 // cell cycle // inferred from electronic annotation /// 7283 // spermatogenesis // inferred from mutant phenotype /// 7476 // wing morphogenesis // infe…	5856 // cytoskeleton // non-traceable author statement /// 5868 // cytoplasmic dynein complex // inferred from sequence or structural similarity /// 5868 // cytoplasmic dynein complex // non-traceable author statement /// 30286 // dynein complex // inferred from sequence or structural similarity /// 5874 // microtubule // inferred from electronic annotation /// 5875 // microtubule associated comp…	IPR001372 // Dynein light chain, type 1 // 1.6E-67
5074	146273_at	-0.733315	1.8801	-8.08016	3.59e-09	6.15e-08	10.5109	FBgn0032413	CG16997	CG16997	CG16997	34638	4252 // serine-type endopeptidase activity // inferred from sequence or structural similarity /// 4263 // chymotrypsin activity // non-traceable author statement /// 4295 // trypsin activity // inferred from electronic annotation /// 4252 // serine-type endopeptidase activity // inferred from electronic annotation /// 4252 // serine-type endopeptidase activity // inferred from sequence similarity	6508 // proteolysis // non-traceable author statement /// 6508 // proteolysis // inferred from electronic annotation	---	IPR001254 // Peptidase S1, chymotrypsin // 1.2E-53
11053	152252_at	-0.46593	1.01218	-8.06739	3.72e-09	6.33e-08	10.4766	FBgn0036986	CG5282	CG5282	CG5282	40256	4237 // membrane dipeptidase activity // inferred from sequence or structural similarity /// 8239 // dipeptidyl-peptidase activity // inferred from electronic annotation /// 4237 // membrane dipeptidase activity // inferred from electronic annotation /// 4237 // membrane dipeptidase activity // inferred from sequence similarity	6508 // proteolysis // inferred from electronic annotation	---	IPR008257 // Peptidase M19, renal dipeptidase // 4.2E-31
11822	153021_at	-0.729978	0.473302	-8.05895	3.8e-09	6.46e-08	10.4538	FBgn0037727	CG8358	CG8358	CG8358	41172	4245 // neprilysin activity // inferred from sequence or structural similarity /// 8270 // zinc ion binding // inferred from electronic annotation /// 4245 // neprilysin activity // inferred from electronic annotation /// 8233 // peptidase activity // inferred from electronic annotation /// 8237 // metallopeptidase activity // inferred from electronic annotation /// 16787 // hydrolase activity //…	6508 // proteolysis // inferred from electronic annotation /// 7165 // signal transduction // inferred from electronic annotation	16020 // membrane // inferred from electronic annotation	IPR008753 // Peptidase M13 // 2.8E-8 /// IPR000718 // Peptidase M13, neprilysin // 3.9E-36
12526	153725_at	-1.37723	4.77712	-8.0576	3.82e-09	6.48e-08	10.4502	FBgn0031285	CG3662	CG3662	CG3662	33260	5515 // protein binding // inferred from physical interaction	---	---	IPR007084 // BRICHOS // 4.1E-39
278	141477_at	-0.441665	0.37256	-8.04261	3.97e-09	6.73e-08	10.4098	FBgn0038318	CG6236	CG6236	CG6236	41857	---	---	---	IPR004245 // Protein of unknown function DUF229 // 1.0E-126
5990	147189_at	-0.577568	1.93102	-8.0339	4.06e-09	6.85e-08	10.3863	FBgn0033907	CG8338	mRpS16	mitochondrial ribosomal protein S16	36570	3735 // structural constituent of ribosome // inferred from sequence or structural similarity /// 3735 // structural constituent of ribosome // non-traceable author statement /// 3735 // structural constituent of ribosome // inferred from electronic annotation /// 3735 // structural constituent of ribosome // inferred from sequence similarity	6412 // protein biosynthesis // inferred from sequence or structural similarity /// 6412 // protein biosynthesis // inferred from electronic annotation /// 6412 // protein biosynthesis // inferred from sequence similarity	5763 // mitochondrial small ribosomal subunit // inferred from sequence or structural similarity /// 5763 // mitochondrial small ribosomal subunit // non-traceable author statement /// 5622 // intracellular // inferred from electronic annotation /// 5739 // mitochondrion // inferred from electronic annotation /// 5840 // ribosome // inferred from electronic annotation /// 30529 // ribonucleoprote…	IPR000307 // Ribosomal protein S16 // 2.5E-10
6271	147470_at	-0.629666	2.46057	-8.0342	4.06e-09	6.85e-08	10.3871	FBgn0034399	CG15083	CG15083	CG15083	37175	---	---	---	---
7510	148709_at	-0.656324	1.50329	-8.02778	4.13e-09	6.93e-08	10.3698	FBgn0036359	CG14105	CG14105	CG14105	39507	---	---	---	IPR001440 // TPR repeat // 1.9E-6 /// IPR001440 // TPR repeat // 9.5E-5
10812	152011_at	-0.729177	1.5839	-8.02258	4.19e-09	7e-08	10.3557	FBgn0011701	CG31240	repo	reversed polarity	47285	3677 // DNA binding // inferred from electronic annotation /// 3700 // transcription factor activity // inferred from electronic annotation /// 3702 // RNA polymerase II transcription factor activity // non-traceable author statement /// 43565 // sequence-specific DNA binding // inferred from electronic annotation	6357 // regulation of transcription from RNA polymerase II promoter // non-traceable author statement /// 7601 // visual perception // inferred from electronic annotation /// 10001 // glial cell differentiation // non-traceable author statement /// 6355 // regulation of transcription, DNA-dependent // inferred from electronic annotation /// 7275 // development // inferred from electronic annotati…	5634 // nucleus // non-traceable author statement /// 5634 // nucleus // inferred from electronic annotation	IPR001356 // Homeobox // 7.8E-34
13030	154229_at	-0.757473	2.31481	-8.02125	4.2e-09	7.02e-08	10.3521	FBgn0029969	CG10932	CG10932	CG10932	31695	3985 // acetyl-CoA C-acetyltransferase activity // inferred from sequence or structural similarity /// 3985 // acetyl-CoA C-acetyltransferase activity // inferred from sequence similarity	6090 // pyruvate metabolism // inferred from sequence or structural similarity /// 6633 // fatty acid biosynthesis // inferred from sequence or structural similarity /// 6090 // pyruvate metabolism // inferred from sequence similarity /// 6633 // fatty acid biosynthesis // inferred from sequence similarity	5739 // mitochondrion // inferred from sequence or structural similarity /// 5739 // mitochondrion // inferred from sequence similarity	IPR002155 // Thiolase // 2.4E-60 /// IPR002155 // Thiolase // 1.0E-126
12583	153782_at	-0.935587	5.32773	-8.01672	4.26e-09	7.09e-08	10.3399	FBgn0035978	CG4347	UGP	UGP	39065	3983 // UTP:glucose-1-phosphate uridylyltransferase activity // inferred from sequence or structural similarity /// 42802 // identical protein binding // inferred from physical interaction /// 16779 // nucleotidyltransferase activity // inferred from electronic annotation /// 3983 // UTP:glucose-1-phosphate uridylyltransferase activity // inferred from sequence similarity	5976 // polysaccharide metabolism // inferred from electronic annotation /// 8152 // metabolism // inferred from electronic annotation	---	IPR002618 // UTP--glucose-1-phosphate uridylyltransferase // 1.0E-126 /// IPR002618 // UTP--glucose-1-phosphate uridylyltransferase // 1.0E-126
9688	150887_at	-0.700234	0.23838	-8.00956	4.34e-09	7.22e-08	10.3206	FBgn0039768	CG15533	CG15533	CG15533	43612	4767 // sphingomyelin phosphodiesterase activity // inferred from sequence or structural similarity /// 4767 // sphingomyelin phosphodiesterase activity // inferred from electronic annotation /// 16787 // hydrolase activity // inferred from electronic annotation /// 4767 // sphingomyelin phosphodiesterase activity // inferred from sequence similarity	6684 // sphingomyelin metabolism // inferred from sequence or structural similarity /// 6685 // sphingomyelin catabolism // inferred from electronic annotation /// 6684 // sphingomyelin metabolism // inferred from sequence similarity	---	IPR004843 // Metallo-phosphoesterase // 8.3E-18
10124	151323_at	-0.816652	1.08331	-8.00365	4.41e-09	7.32e-08	10.3046	FBgn0040850	CG15210	CG15210	CG15210	50323	---	---	---	---
11870	153069_at	-1.3011	4.34847	-8.00072	4.44e-09	7.36e-08	10.2967	FBgn0034394	CG15096	CG15096	CG15096	37170	5316 // high affinity inorganic phosphate:sodium symporter activity // inferred from sequence or structural similarity /// 5215 // transporter activity // inferred from electronic annotation /// 5316 // high affinity inorganic phosphate:sodium symporter activity // inferred from sequence similarity	5975 // carbohydrate metabolism // inferred from electronic annotation /// 6796 // phosphate metabolism // inferred from electronic annotation /// 6812 // cation transport // inferred from electronic annotation /// 6817 // phosphate transport // inferred from electronic annotation /// 6858 // extracellular transport // inferred from electronic annotation /// 8643 // carbohydrate transport // infe…	16020 // membrane // inferred from electronic annotation /// 16021 // integral to membrane // inferred from electronic annotation	---
2460	143659_at	-0.60822	0.714302	-7.99655	4.49e-09	7.43e-08	10.2855	FBgn0011554	CG12386	Try	Trypsin	36217	4263 // chymotrypsin activity // inferred from electronic annotation /// 4295 // trypsin activity // inferred from sequence or structural similarity /// 4295 // trypsin activity // non-traceable author statement /// 4252 // serine-type endopeptidase activity // inferred from electronic annotation /// 4295 // trypsin activity // inferred from sequence similarity	6508 // proteolysis // non-traceable author statement /// 6508 // proteolysis // inferred from electronic annotation	5576 // extracellular region // non-traceable author statement	IPR001254 // Peptidase S1, chymotrypsin // 1.1E-92
13957	155156_at	-0.572521	0.58036	-7.99504	4.51e-09	7.45e-08	10.2814	FBgn0032925	CG9246	CG9246	CG9246	35386	5351 // sugar porter activity // inferred from electronic annotation	9401 // phosphoenolpyruvate-dependent sugar phosphotransferase system // inferred from electronic annotation	5634 // nucleus // inferred from electronic annotation	IPR005343 // Protein of unknown function UPF0120 // 1.0E-126
10354	151553_at	-0.666389	1.99333	-7.99393	4.52e-09	7.45e-08	10.2784	FBgn0034978	CG3257	CG3257	CG3257	37862	---	---	---	---
287	141486_at	-0.629604	4.02282	-7.98773	4.6e-09	7.57e-08	10.2616	FBgn0004179	CG6395	Csp	Cysteine string protein	40459	5506 // iron ion binding // inferred from electronic annotation /// 42623 // ATPase activity, coupled // inferred from electronic annotation /// 51082 // unfolded protein binding // inferred from electronic annotation /// 31072 // heat shock protein binding // inferred from electronic annotation	6118 // electron transport // inferred from electronic annotation /// 6457 // protein folding // inferred from electronic annotation /// 6457 // protein folding // non-traceable author statement /// 6886 // intracellular protein transport // inferred from electronic annotation /// 6887 // exocytosis // inferred from mutant phenotype /// 6950 // response to stress // inferred from electronic annot…	5886 // plasma membrane // inferred from sequence or structural similarity /// 8021 // synaptic vesicle // traceable author statement /// 16020 // membrane // inferred from electronic annotation /// 5886 // plasma membrane // inferred from sequence similarity	IPR001623 // Heat shock protein DnaJ, N-terminal // 2.4E-36 /// IPR001623 // Heat shock protein DnaJ, N-terminal // 9.6E-36
13552	154751_at	-0.639937	2.47877	-7.98659	4.61e-09	7.58e-08	10.2585	FBgn0002524	CG4162	lace	lace	34910	4758 // serine C-palmitoyltransferase activity // inferred from sequence or structural similarity /// 4758 // serine C-palmitoyltransferase activity // non-traceable author statement /// 8483 // transaminase activity // inferred from electronic annotation /// 5515 // protein binding // inferred from physical interaction /// 16740 // transferase activity // inferred from electronic annotation /// …	6629 // lipid metabolism // inferred from electronic annotation /// 9058 // biosynthesis // inferred from electronic annotation	---	IPR004839 // Aminotransferase, class I and II // 6.9E-29
3647	144846_at	-0.887248	1.16177	-7.97944	4.7e-09	7.71e-08	10.2392	---	CG2081	---	---	---	---	---	---	---
2399	143598_at	-0.64594	0.627399	-7.97691	4.73e-09	7.75e-08	10.2324	FBgn0010338	CG32684	Man-I	Mannosidase I	31957	4571 // mannosyl-oligosaccharide 1,2-alpha-mannosidase activity // inferred from sequence or structural similarity /// 4571 // mannosyl-oligosaccharide 1,2-alpha-mannosidase activity // non-traceable author statement /// 5509 // calcium ion binding // inferred from electronic annotation /// 4571 // mannosyl-oligosaccharide 1,2-alpha-mannosidase activity // inferred from electronic annotation /// …	6487 // protein amino acid N-linked glycosylation // inferred from sequence or structural similarity /// 6487 // protein amino acid N-linked glycosylation // non-traceable author statement /// 5975 // carbohydrate metabolism // inferred from electronic annotation /// 6487 // protein amino acid N-linked glycosylation // inferred from electronic annotation /// 6487 // protein amino acid N-linked gl…	139 // Golgi membrane // non-traceable author statement /// 5794 // Golgi apparatus // inferred from sequence or structural similarity /// 5795 // Golgi stack // inferred from electronic annotation /// 16020 // membrane // inferred from electronic annotation /// 16021 // integral to membrane // inferred from electronic annotation /// 5794 // Golgi apparatus // inferred from sequence similarity	IPR001382 // Glycoside hydrolase, family 47 // 1.0E-126
5975	147174_at	-0.635232	0.370232	-7.97072	4.81e-09	7.85e-08	10.2156	FBgn0033880	CG6553	CG6553	CG6553	36537	---	---	---	IPR002172 // Low density lipoprotein-receptor, class A // 9.6E-10 /// IPR002172 // Low density lipoprotein-receptor, class A // 6.9E-10 /// IPR002172 // Low density lipoprotein-receptor, class A // 9.5E-8
7425	148624_at	-0.914455	3.81095	-7.97039	4.82e-09	7.85e-08	10.2147	FBgn0036232	CG14125	CG14125	CG14125	39359	---	---	---	IPR006970 // PT repeat // 0.065 /// IPR006970 // PT repeat // 3.2E-9 /// IPR002557 // Chitin binding Peritrophin-A // 1.5E-12
13723	154922_at	-0.522197	1.39902	-7.96127	4.94e-09	8.03e-08	10.1901	FBgn0039690	CG1969	CG1969	CG1969	43504	4343 // glucosamine 6-phosphate N-acetyltransferase activity // non-traceable author statement /// 4343 // glucosamine 6-phosphate N-acetyltransferase activity // inferred from electronic annotation /// 8080 // N-acetyltransferase activity // inferred from electronic annotation /// 8415 // acyltransferase activity // inferred from electronic annotation /// 16740 // transferase activity // inferre…	---	---	IPR000182 // GCN5-related N-acetyltransferase // 3.7E-14 /// IPR000182 // GCN5-related N-acetyltransferase // 3.7E-14
12504	153703_at	-1.21024	4.35513	-7.95505	5.02e-09	8.16e-08	10.1732	FBgn0000575	CG1007	emc	extra macrochaetae	38091	3714 // transcription corepressor activity // inferred from sequence or structural similarity /// 3714 // transcription corepressor activity // non-traceable author statement /// 5515 // protein binding // non-traceable author statement /// 5515 // protein binding // inferred from physical interaction /// 30528 // transcription regulator activity // inferred from electronic annotation /// 3714 //…	122 // negative regulation of transcription from RNA polymerase II promoter // traceable author statement /// 7286 // spermatid development // inferred from mutant phenotype /// 7399 // nervous system development // non-traceable author statement /// 7422 // peripheral nervous system development // inferred from mutant phenotype /// 7423 // sensory organ development // non-traceable author statem…	5634 // nucleus // inferred from sequence or structural similarity /// 5634 // nucleus // non-traceable author statement /// 5634 // nucleus // inferred from electronic annotation /// 5634 // nucleus // inferred from sequence similarity	IPR001092 // Basic helix-loop-helix dimerization domain bHLH // 6.0E-9
10903	152102_at	-0.982771	2.29526	-7.95039	5.08e-09	8.25e-08	10.1606	FBgn0035189	CG9119	CG9119	CG9119	38124	---	---	---	---
11264	152463_at	-0.662429	1.80203	-7.94878	5.1e-09	8.27e-08	10.1563	FBgn0030164	CG1889	CG1889	CG1889	31928	5102 // receptor binding // inferred from electronic annotation	---	---	IPR002181 // Fibrinogen, beta/gamma chain, C-terminal globular // 5.4E-58 /// IPR002181 // Fibrinogen, beta/gamma chain, C-terminal globular // 5.4E-58
8700	149899_at	-0.806821	2.82671	-7.92376	5.46e-09	8.79e-08	10.0885	FBgn0038236	CG3360	Cyp313a1	Cyp313a1	41759	3735 // structural constituent of ribosome // inferred from electronic annotation /// 4497 // monooxygenase activity // inferred from electronic annotation /// 16491 // oxidoreductase activity // inferred from electronic annotation	6118 // electron transport // inferred from electronic annotation /// 6412 // protein biosynthesis // inferred from electronic annotation /// 8202 // steroid metabolism // inferred from electronic annotation /// 17143 // insecticide metabolism // non-traceable author statement	5622 // intracellular // inferred from electronic annotation /// 5792 // microsome // non-traceable author statement /// 5840 // ribosome // inferred from electronic annotation /// 16020 // membrane // non-traceable author statement	IPR001128 // Cytochrome P450 // 5.5E-5 /// IPR001128 // Cytochrome P450 // 4.8E-59
11565	152764_at	-0.615831	0.580975	-7.9228	5.47e-09	8.8e-08	10.0859	FBgn0034276	CG6385	CG6385	CG6385	37026	4047 // aminomethyltransferase activity // inferred from electronic annotation /// 8480 // sarcosine dehydrogenase activity // inferred from sequence or structural similarity /// 16491 // oxidoreductase activity // inferred from electronic annotation /// 8480 // sarcosine dehydrogenase activity // inferred from sequence similarity	6118 // electron transport // inferred from electronic annotation /// 6520 // amino acid metabolism // inferred from electronic annotation /// 6546 // glycine catabolism // inferred from electronic annotation	5737 // cytoplasm // inferred from electronic annotation	IPR006222 // Glycine cleavage T protein (aminomethyl transferase) // 1.4E-39
4825	146024_at	-0.629142	-0.148192	-7.91784	5.55e-09	8.9e-08	10.0724	FBgn0032024	CG14273	CG14273	CG14273	34146	---	---	---	---
11133	152332_at	-0.703276	3.16262	-7.91628	5.57e-09	8.93e-08	10.0682	FBgn0030251	CG2145	CG2145	CG2145	32027	8236 // serine-type peptidase activity // inferred from sequence or structural similarity /// 8236 // serine-type peptidase activity // inferred from sequence similarity	---	---	---
2839	144038_at	-0.966756	1.76611	-7.91393	5.6e-09	8.97e-08	10.0619	FBgn0024963	CG7535	GluCl	GluCl	---	8068 // glutamate-gated chloride channel activity // inferred from direct assay /// 4872 // receptor activity // inferred from electronic annotation /// 4890 // GABA-A receptor activity // inferred from electronic annotation /// 5216 // ion channel activity // inferred from electronic annotation /// 5230 // extracellular ligand-gated ion channel activity // inferred from electronic annotation ///…	6821 // chloride transport // inferred from direct assay /// 6810 // transport // inferred from electronic annotation /// 6811 // ion transport // inferred from electronic annotation	16020 // membrane // inferred from electronic annotation /// 16021 // integral to membrane // inferred from electronic annotation /// 45211 // postsynaptic membrane // inferred from electronic annotation	IPR006029 // Neurotransmitter-gated ion-channel transmembrane region // 2.4E-33 /// IPR006029 // Neurotransmitter-gated ion-channel transmembrane region // 2.0E-7 /// IPR006202 // Neurotransmitter-gated ion-channel ligand binding domain // 2.7E-65
10468	151667_s_at	-0.594859	2.97088	-7.90436	5.75e-09	9.17e-08	10.0359	FBgn0035906	CG6673	CG6673	CG6673	38974	4364 // glutathione transferase activity // inferred from sequence or structural similarity /// 4364 // glutathione transferase activity // inferred from electronic annotation /// 4364 // glutathione transferase activity // inferred from sequence similarity	6800 // oxygen and reactive oxygen species metabolism // inferred from electronic annotation /// 6952 // defense response // inferred from electronic annotation /// 9636 // response to toxin // inferred from electronic annotation /// 8152 // metabolism // inferred from electronic annotation	5737 // cytoplasm // inferred from electronic annotation	IPR004046 // Glutathione S-transferase, C-terminal // 8.7E-6 /// IPR004045 // Glutathione S-transferase, N-terminal // 3.3E-12
4901	146100_at	-1.01649	0.972019	-7.89002	5.98e-09	9.51e-08	9.99698	FBgn0032140	CG13117	CG13117	CG13117	34289	5515 // protein binding // inferred from physical interaction	---	---	---
1297	142496_at	-0.48626	-0.0680018	-7.8608	6.46e-09	1.03e-07	9.91763	---	---	---	---	---	---	---	---	---
2398	143597_at	-0.665096	3.79093	-7.85874	6.5e-09	1.03e-07	9.91203	FBgn0010333	CG2248	Rac1	Rac1	38146	3924 // GTPase activity // inferred from sequence or structural similarity /// 3924 // GTPase activity // non-traceable author statement /// 3924 // GTPase activity // traceable author statement /// 5525 // GTP binding // inferred from electronic annotation /// 5515 // protein binding // inferred from physical interaction /// 166 // nucleotide binding // inferred from electronic annotation /// 39…	7017 // microtubule-based process // non-traceable author statement /// 7164 // establishment of tissue polarity // non-traceable author statement /// 7186 // G-protein coupled receptor protein signaling pathway // inferred from electronic annotation /// 7254 // JNK cascade // traceable author statement /// 7264 // small GTPase mediated signal transduction // inferred from electronic annotation /…	16028 // rhabdomere // inferred from direct assay /// 5622 // intracellular // inferred from electronic annotation /// 16020 // membrane // inferred from electronic annotation	IPR001806 // Ras GTPase superfamily // 6.3E-92
10323	151522_at	-0.86963	4.07326	-7.85822	6.51e-09	1.03e-07	9.9106	FBgn0029155	CG5889	Mdh	Mdh	43936	4473 // malate dehydrogenase (oxaloacetate-decarboxylating) (NADP+) activity // inferred from sequence or structural similarity /// 4473 // malate dehydrogenase (oxaloacetate-decarboxylating) (NADP+) activity // non-traceable author statement /// 16831 // carboxy-lyase activity // inferred from electronic annotation /// 5515 // protein binding // inferred from physical interaction /// 4470 // mal…	6090 // pyruvate metabolism // inferred from sequence or structural similarity /// 6099 // tricarboxylic acid cycle // inferred from electronic annotation /// 6108 // malate metabolism // inferred from sequence or structural similarity /// 6108 // malate metabolism // inferred from electronic annotation /// 6090 // pyruvate metabolism // inferred from sequence similarity /// 6108 // malate metabo…	5739 // mitochondrion // inferred from sequence or structural similarity /// 5739 // mitochondrion // inferred from sequence similarity	IPR001891 // Malic oxidoreductase // 1.0E-126 /// IPR001891 // Malic oxidoreductase // 1.0E-126
12676	153875_at	-0.460156	0.65461	-7.85727	6.53e-09	1.03e-07	9.90802	FBgn0022070	CG7989	l(2)k07824	lethal (2) k07824	36831	---	---	---	---
6500	147699_at	-1.14654	2.82129	-7.85537	6.56e-09	1.04e-07	9.90287	FBgn0034761	CG4250	CG4250	CG4250	37599	---	---	---	---
6232	147431_at	-2.08012	4.35395	-7.85047	6.65e-09	1.05e-07	9.88953	FBgn0034329	CG18108	IM1	Immune induced molecule 1	37100	---	6952 // defense response // inferred from direct assay	5576 // extracellular region // inferred from direct assay	---
3032	144231_at	-0.658621	1.55918	-7.84047	6.83e-09	1.07e-07	9.86234	FBgn0028532	CG7968	CG7968	CG7968	34802	---	---	---	---
2627	143826_at	-0.884053	3.28914	-7.83866	6.86e-09	1.08e-07	9.85743	FBgn0015585	CG10852	Acp63F	Accessory gland peptide 63F	38448	---	7582 // physiological process // non-traceable author statement /// 45297 // post-mating behavior // non-traceable author statement /// 7610 // behavior // inferred from electronic annotation	---	---
10972	152171_at	-0.542131	0.409321	-7.83705	6.89e-09	1.08e-07	9.85303	FBgn0013972	CG1912	Gyc99B	Guanylyl cyclase subunit at 99B	43493	4383 // guanylate cyclase activity // inferred from direct assay /// 4383 // guanylate cyclase activity // non-traceable author statement /// 4383 // guanylate cyclase activity // inferred from electronic annotation /// 16829 // lyase activity // inferred from electronic annotation /// 16849 // phosphorus-oxygen lyase activity // inferred from electronic annotation	6139 // nucleobase, nucleoside, nucleotide and nucleic acid metabolism // inferred from electronic annotation /// 7186 // G-protein coupled receptor protein signaling pathway // inferred from electronic annotation /// 7263 // nitric oxide mediated signal transduction // inferred from electronic annotation /// 9187 // cyclic nucleotide metabolism // inferred from electronic annotation /// 9586 // …	5737 // cytoplasm // non-traceable author statement /// 8074 // guanylate cyclase complex, soluble // inferred from direct assay /// 8074 // guanylate cyclase complex, soluble // non-traceable author statement	IPR001054 // Guanylate cyclase // 4.7E-91
4850	146049_at	-1.14393	1.3537	-7.8173	7.27e-09	1.13e-07	9.79928	FBgn0032066	CG9463	CG9463	CG9463	34203	4559 // alpha-mannosidase activity // inferred from sequence or structural similarity /// 16799 // hydrolase activity, hydrolyzing N-glycosyl compounds // inferred from electronic annotation /// 4559 // alpha-mannosidase activity // inferred from electronic annotation /// 15923 // mannosidase activity // inferred from electronic annotation /// 16787 // hydrolase activity // inferred from electron…	5975 // carbohydrate metabolism // inferred from electronic annotation /// 6013 // mannose metabolism // inferred from electronic annotation	5764 // lysosome // inferred from sequence or structural similarity /// 5764 // lysosome // inferred from sequence similarity	IPR000602 // Glycoside hydrolase, family 38 // 1.0E-126
4364	145563_at	-0.482299	0.521929	-7.81639	7.28e-09	1.13e-07	9.7968	FBgn0031312	CG4775	l(2)k00619	lethal (2) k00619	33298	---	---	---	---
11874	153073_at	-1.09703	2.82575	-7.80731	7.47e-09	1.16e-07	9.77209	FBgn0033837	CG17034	CG17034	CG17034	36488	5524 // ATP binding // inferred from electronic annotation /// 15662 // ATPase activity, coupled to transmembrane movement of ions, phosphorylative mechanism // inferred from sequence or structural similarity /// 16820 // hydrolase activity, acting on acid anhydrides, catalyzing transmembrane movement of substances // inferred from electronic annotation /// 166 // nucleotide binding // inferred f…	6629 // lipid metabolism // inferred from electronic annotation /// 6812 // cation transport // inferred from electronic annotation /// 6869 // lipid transport // inferred from electronic annotation /// 8152 // metabolism // inferred from electronic annotation	16020 // membrane // inferred from electronic annotation /// 16021 // integral to membrane // inferred from electronic annotation	---
213	141412_at	-0.763148	0.237062	-7.77592	8.13e-09	1.25e-07	9.68654	FBgn0030955	CG6891	CG6891	CG6891	32865	3779 // actin binding // inferred from electronic annotation	---	5622 // intracellular // inferred from electronic annotation	IPR002108 // Actin-binding, cofilin/tropomyosin type // 6.2E-12 /// IPR002108 // Actin-binding, cofilin/tropomyosin type // 6.2E-12
5354	146553_at	-0.530062	1.01523	-7.77501	8.15e-09	1.26e-07	9.68404	FBgn0032888	CG14405	CheB38c	CheB38c	35346	5272 // sodium channel activity // inferred from electronic annotation	6814 // sodium ion transport // inferred from electronic annotation	16020 // membrane // inferred from electronic annotation	---
8842	150041_at	-0.782901	1.62642	-7.74652	8.8e-09	1.35e-07	9.60631	FBgn0038467	CG3590	CG3590	CG3590	42051	4018 // adenylosuccinate lyase activity // inferred from sequence or structural similarity /// 3824 // catalytic activity // inferred from electronic annotation /// 4018 // adenylosuccinate lyase activity // inferred from electronic annotation /// 16829 // lyase activity // inferred from electronic annotation /// 4018 // adenylosuccinate lyase activity // inferred from sequence similarity	6144 // purine base metabolism // inferred from electronic annotation /// 9152 // purine ribonucleotide biosynthesis // inferred from electronic annotation	---	IPR000362 // Fumarate lyase // 6.3E-70
13939	155138_at	-0.467767	1.44086	-7.74497	8.83e-09	1.35e-07	9.60207	FBgn0037299	CG1115	CG1115	CG1115	40624	5515 // protein binding // inferred from physical interaction	---	---	IPR009851 // Modifier of rudimentary (Mod // 9.8E-87
9238	150437_at	-0.579346	1.03098	-7.74217	8.9e-09	1.36e-07	9.59442	FBgn0039068	CG13827	CG13827	CG13827	42751	---	16559 // peroxisome fission // inferred from electronic annotation	5778 // peroxisomal membrane // inferred from electronic annotation	IPR008733 // Peroxisomal biogenesis factor 11 // 3.0E-95
11211	152410_at	-0.74815	2.0869	-7.73587	9.05e-09	1.38e-07	9.57722	FBgn0015573	CG1089	Est5	Esterase-5	40905	4091 // carboxylesterase activity // inferred from sequence or structural similarity /// 4091 // carboxylesterase activity // non-traceable author statement /// 3824 // catalytic activity // inferred from electronic annotation /// 4091 // carboxylesterase activity // inferred from sequence similarity	---	---	IPR002018 // Carboxylesterase, type B // 1.0E-126
10531	151730_at	-0.5082	0.419083	-7.726	9.3e-09	1.42e-07	9.55024	FBgn0040069	CG32754	vanin-like	vanin-like	31551	16787 // hydrolase activity // non-traceable author statement /// 17159 // pantetheinase activity // inferred from sequence or structural similarity /// 16787 // hydrolase activity // inferred from electronic annotation /// 16810 // hydrolase activity, acting on carbon-nitrogen (but not peptide) bonds // inferred from electronic annotation /// 16811 // hydrolase activity, acting on carbon-nitroge…	6732 // coenzyme metabolism // inferred from electronic annotation /// 6807 // nitrogen compound metabolism // inferred from electronic annotation /// 6928 // cell motility // inferred from electronic annotation /// 7010 // cytoskeleton organization and biogenesis // inferred from electronic annotation /// 7165 // signal transduction // inferred from electronic annotation /// 9110 // vitamin bios…	19898 // extrinsic to membrane // non-traceable author statement	IPR003010 // Nitrilase/cyanide hydratase and apolipoprotein N-acyltransferase // 2.6E-5
11937	153136_at	-0.654154	1.98184	-7.7223	9.39e-09	1.43e-07	9.54013	FBgn0014411	CG14804	CG14804	CG14804	31144	---	6605 // protein targeting // inferred from sequence or structural similarity /// 6886 // intracellular protein transport // inferred from sequence or structural similarity /// 7040 // lysosome organization and biogenesis // inferred from sequence or structural similarity /// 6810 // transport // inferred from electronic annotation /// 6886 // intracellular protein transport // inferred from elect…	---	IPR005377 // Vacuolar protein sorting-associated protein 26 // 1.0E-126
524	141723_at	-0.471841	0.657735	-7.72	9.45e-09	1.44e-07	9.53385	FBgn0034346	CG12263	CG12263	CG12263	37118	16787 // hydrolase activity // inferred from electronic annotation	6464 // protein modification // inferred from electronic annotation /// 6497 // protein amino acid lipidation // inferred from electronic annotation /// 9117 // nucleotide metabolism // inferred from electronic annotation /// 19538 // protein metabolism // inferred from electronic annotation	---	IPR002591 // Type I phosphodiesterase/nucleotide pyrophosphatase // 2.4E-8
11849	153048_at	-0.60136	1.13783	-7.69614	1.01e-08	1.53e-07	9.46859	FBgn0033973	CG12855	CG12855	CG12855	36656	---	---	---	---
2941	144140_at	-1.08136	5.44742	-7.69174	1.02e-08	1.54e-07	9.45655	FBgn0026409	CG4994	Mpcp	Mitochondrial phosphate carrier protein	39587	5386 // carrier activity // inferred from sequence or structural similarity /// 5488 // binding // inferred from electronic annotation /// 15114 // phosphate transporter activity // inferred from sequence or structural similarity /// 15114 // phosphate transporter activity // non-traceable author statement /// 5386 // carrier activity // inferred from sequence similarity /// 15114 // phosphate tr…	6796 // phosphate metabolism // inferred from electronic annotation /// 6817 // phosphate transport // inferred from sequence or structural similarity /// 6817 // phosphate transport // non-traceable author statement /// 6810 // transport // inferred from electronic annotation /// 6817 // phosphate transport // inferred from sequence similarity	5739 // mitochondrion // non-traceable author statement /// 5740 // mitochondrial envelope // inferred from sequence or structural similarity /// 5743 // mitochondrial inner membrane // inferred from sequence or structural similarity /// 16020 // membrane // inferred from electronic annotation /// 16021 // integral to membrane // inferred from electronic annotation /// 5740 // mitochondrial envel…	IPR001993 // Mitochondrial substrate carrier // 6.6E-28 /// IPR001993 // Mitochondrial substrate carrier // 1.2E-25 /// IPR001993 // Mitochondrial substrate carrier // 1.9E-10
9938	151137_r_at	-1.62999	5.55536	-7.69064	1.02e-08	1.54e-07	9.45353	FBgn0040653	CG15231	IM4	Immune induced molecule 4	50126	---	6952 // defense response // inferred from direct assay /// 6955 // immune response // traceable author statement /// 6955 // immune response // inferred from electronic annotation /// 45087 // innate immune response // inferred from electronic annotation /// 6952 // defense response // non-traceable author statement	5576 // extracellular region // inferred from direct assay /// 5576 // extracellular region // non-traceable author statement	---
11001	152200_at	-0.672539	0.882551	-7.68347	1.04e-08	1.57e-07	9.43391	FBgn0003308	CG7642	ry	rosy	41605	4854 // xanthine dehydrogenase activity // non-traceable author statement /// 4854 // xanthine dehydrogenase activity // traceable author statement /// 4854 // xanthine dehydrogenase activity // inferred from electronic annotation /// 5506 // iron ion binding // inferred from electronic annotation /// 16491 // oxidoreductase activity // inferred from electronic annotation /// 30151 // molybdenum …	6118 // electron transport // inferred from electronic annotation /// 6144 // purine base metabolism // inferred from electronic annotation /// 6800 // oxygen and reactive oxygen species metabolism // inferred from electronic annotation /// 6952 // defense response // inferred from electronic annotation /// 48072 // eye pigmentation (sensu Endopterygota) // traceable author statement	5777 // peroxisome // non-traceable author statement /// 5777 // peroxisome // inferred from electronic annotation	IPR008274 // Aldehyde oxidase and xanthine dehydrogenase, molybdopterin binding // 1.0E-126 /// IPR000674 // Aldehyde oxidase and xanthine dehydrogenase, a/b hammerhead // 1.8E-61 /// IPR002346 // Molybdopterin dehydrogenase, FAD-binding // 1.0E-100 /// IPR002888 // [2Fe-2S]-binding // 1.3E-62 /// IPR005107 // CO dehydrogenase flavoprotein C-terminal domain // 2.9E-57 /// IPR001041 // Ferredoxin …
3649	144848_at	-0.368926	0.520827	-7.66203	1.11e-08	1.65e-07	9.37517	FBgn0030265	CG11126	CG11126	CG11126	32044	8253 // 5'-nucleotidase activity // inferred from sequence or structural similarity /// 19204 // nucleotide phosphatase activity // inferred from electronic annotation /// 16787 // hydrolase activity // inferred from electronic annotation /// 8253 // 5'-nucleotidase activity // inferred from sequence similarity	6139 // nucleobase, nucleoside, nucleotide and nucleic acid metabolism // inferred from electronic annotation /// 9166 // nucleotide catabolism // inferred from electronic annotation	---	IPR008334 // 5-Nucleotidase, C-terminal // 6.0E-62
5541	146740_at	-0.880275	1.10245	-7.65388	1.13e-08	1.69e-07	9.35284	FBgn0033170	CG11124	sPLA2	secretory Phospholipase A2	35665	4623 // phospholipase A2 activity // inferred from sequence or structural similarity /// 4623 // phospholipase A2 activity // non-traceable author statement /// 5509 // calcium ion binding // inferred from electronic annotation /// 47498 // calcium-dependent phospholipase A2 activity // inferred from direct assay /// 4623 // phospholipase A2 activity // inferred from electronic annotation /// 462…	6644 // phospholipid metabolism // inferred from electronic annotation /// 16042 // lipid catabolism // inferred from electronic annotation	5576 // extracellular region // inferred from electronic annotation	IPR008774 // A2 Phospholipase // 5.2E-66 /// IPR008774 // A2 Phospholipase // 3.5E-37
948	142147_at	-1.50899	2.73239	-7.65245	1.14e-08	1.69e-07	9.34891	FBgn0032068	CG9466	CG9466	CG9466	34205	4559 // alpha-mannosidase activity // inferred from sequence or structural similarity /// 16799 // hydrolase activity, hydrolyzing N-glycosyl compounds // inferred from electronic annotation /// 4559 // alpha-mannosidase activity // inferred from electronic annotation /// 15923 // mannosidase activity // inferred from electronic annotation /// 16787 // hydrolase activity // inferred from electron…	5975 // carbohydrate metabolism // inferred from electronic annotation /// 6013 // mannose metabolism // inferred from electronic annotation	5764 // lysosome // inferred from sequence or structural similarity /// 5764 // lysosome // inferred from sequence similarity	IPR000602 // Glycoside hydrolase, family 38 // 1.0E-126
3416	144615_at	-0.522671	0.872246	-7.64625	1.15e-08	1.72e-07	9.33193	FBgn0029502	CG14437	COQ7	COQ7	44007	---	6094 // gluconeogenesis // inferred from electronic annotation /// 6743 // ubiquinone metabolism // inferred from sequence or structural similarity /// 6744 // ubiquinone biosynthesis // inferred from electronic annotation /// 19538 // protein metabolism // inferred from electronic annotation /// 6743 // ubiquinone metabolism // inferred from sequence similarity	5743 // mitochondrial inner membrane // inferred from sequence or structural similarity /// 5743 // mitochondrial inner membrane // inferred from sequence similarity	IPR004916 // Ubiquinone biosyntheis protein COQ7 // 5.0E-54 /// IPR004916 // Ubiquinone biosyntheis protein COQ7 // 2.9E-44
12643	153842_at	-1.00431	2.75419	-7.64587	1.16e-08	1.72e-07	9.33088	FBgn0001941	CG9078	ifc	infertile crescent	33836	4768 // stearoyl-CoA 9-desaturase activity // inferred from sequence or structural similarity /// 8237 // metallopeptidase activity // inferred from electronic annotation /// 8270 // zinc ion binding // inferred from electronic annotation /// 42284 // sphingolipid delta-4 desaturase activity // inferred from direct assay /// 16491 // oxidoreductase activity // inferred from electronic annotation …	6508 // proteolysis // inferred from electronic annotation /// 7283 // spermatogenesis // inferred from mutant phenotype /// 7283 // spermatogenesis // traceable author statement	5739 // mitochondrion // traceable author statement /// 5886 // plasma membrane // inferred from sequence or structural similarity /// 5886 // plasma membrane // non-traceable author statement /// 5886 // plasma membrane // inferred from sequence similarity	IPR005804 // Fatty acid desaturase // 2.1E-51
12389	153588_at	-0.643291	1.301	-7.63214	1.2e-08	1.78e-07	9.29322	FBgn0035892	CG7127	exo70	exo70	38959	5326 // neurotransmitter transporter activity // inferred from sequence or structural similarity /// 5515 // protein binding // inferred from physical interaction /// 5326 // neurotransmitter transporter activity // inferred from sequence similarity	6886 // intracellular protein transport // inferred from electronic annotation /// 6887 // exocytosis // inferred from sequence or structural similarity /// 7269 // neurotransmitter secretion // non-traceable author statement /// 16080 // synaptic vesicle targeting // inferred from sequence or structural similarity /// 16080 // synaptic vesicle targeting // non-traceable author statement /// 1608…	145 // exocyst // inferred from sequence or structural similarity /// 145 // exocyst // non-traceable author statement /// 145 // exocyst // inferred from electronic annotation /// 145 // exocyst // inferred from sequence similarity	IPR004140 // Exo70 exocyst complex subunit // 1.0E-126
9389	150588_at	-1.53079	3.54098	-7.62739	1.22e-08	1.8e-07	9.28019	FBgn0039330	CG11909	CG11909	CG11909	43072	4558 // alpha-glucosidase activity // inferred from sequence or structural similarity /// 4553 // hydrolase activity, hydrolyzing O-glycosyl compounds // inferred from electronic annotation /// 4558 // alpha-glucosidase activity // inferred from sequence similarity	5976 // polysaccharide metabolism // inferred from electronic annotation /// 5996 // monosaccharide metabolism // inferred from electronic annotation /// 5975 // carbohydrate metabolism // inferred from electronic annotation	17177 // alpha-glucosidase II complex // inferred from sequence or structural similarity /// 17177 // alpha-glucosidase II complex // inferred from sequence similarity	IPR000322 // Glycoside hydrolase, family 31 // 3.7E-11
1150	142349_at	-0.79557	0.394933	-7.62617	1.22e-08	1.8e-07	9.27686	FBgn0041710	CG18550	yellow-f	yellow-f	41595	4167 // dopachrome isomerase activity // inferred from direct assay /// 5102 // receptor binding // inferred from electronic annotation /// 5198 // structural molecule activity // inferred from electronic annotation /// 16860 // intramolecular oxidoreductase activity // inferred from direct assay	2165 // larval or pupal development (sensu Insecta) // inferred from expression pattern /// 6583 // melanin biosynthesis from tyrosine // traceable author statement /// 7398 // ectoderm development // inferred from electronic annotation /// 42435 // indole derivative biosynthesis // inferred from direct assay /// 48066 // pigmentation during development // traceable author statement	5576 // extracellular region // inferred from direct assay /// 5576 // extracellular region // inferred from sequence or structural similarity /// 5576 // extracellular region // inferred from sequence similarity	IPR003534 // Major royal jelly protein // 1.0E-126
4697	145896_at	-0.626121	1.4362	-7.62599	1.22e-08	1.8e-07	9.27635	FBgn0031809	---	CG9508	CG9508	33893	4245 // neprilysin activity // inferred from sequence or structural similarity /// 8270 // zinc ion binding // inferred from electronic annotation /// 4245 // neprilysin activity // inferred from sequence similarity	6508 // proteolysis // inferred from electronic annotation /// 7155 // cell adhesion // inferred from electronic annotation	16020 // membrane // inferred from electronic annotation	IPR000718 // Peptidase M13, neprilysin // 8.6E-8 /// IPR007110 // Immunoglobulin-like // 6.7E-5 /// IPR007110 // Immunoglobulin-like // 7.1E-8
13221	154420_at	-0.780516	2.76475	-7.62492	1.22e-08	1.8e-07	9.27342	FBgn0005771	CG4491	noc	no ocelli	34847	3676 // nucleic acid binding // inferred from electronic annotation /// 3702 // RNA polymerase II transcription factor activity // inferred from sequence or structural similarity /// 8270 // zinc ion binding // inferred from electronic annotation /// 5515 // protein binding // inferred from physical interaction /// 3702 // RNA polymerase II transcription factor activity // inferred from sequence …	6357 // regulation of transcription from RNA polymerase II promoter // inferred from sequence or structural similarity /// 7424 // tracheal system development (sensu Insecta) // inferred from mutant phenotype /// 6357 // regulation of transcription from RNA polymerase II promoter // inferred from sequence similarity	5634 // nucleus // inferred from sequence or structural similarity /// 5634 // nucleus // inferred from electronic annotation /// 5634 // nucleus // inferred from sequence similarity	---
10012	151211_at	-1.79938	5.93469	-7.62202	1.23e-08	1.81e-07	9.26547	FBgn0040736 /// FBgn0031035	CG16844	IM3 /// RpS10b	Immune induced molecule 3 /// Ribosomal protein S10b	32953 /// 50209	3676 // nucleic acid binding // inferred from electronic annotation /// 3735 // structural constituent of ribosome // inferred from sequence or structural similarity /// 3779 // actin binding // inferred from electronic annotation /// 5200 // structural constituent of cytoskeleton // inferred from electronic annotation /// 8017 // microtubule binding // inferred from electronic annotation /// 192…	6412 // protein biosynthesis // inferred from electronic annotation /// 7010 // cytoskeleton organization and biogenesis // inferred from electronic annotation /// 6952 // defense response // inferred from direct assay /// 8063 // Toll signaling pathway // non-traceable author statement /// 19731 // antibacterial humoral response // inferred from direct assay	5843 // cytosolic small ribosomal subunit (sensu Eukaryota) // inferred from sequence or structural similarity /// 5576 // extracellular region // inferred from direct assay /// 30529 // ribonucleoprotein complex // inferred from electronic annotation /// 5843 // cytosolic small ribosomal subunit (sensu Eukaryota) // inferred from sequence similarity	IPR005326 // Plectin/S10, N-terminal // 2.1E-77
10642	151841_at	-0.851641	1.97684	-7.61226	1.27e-08	1.86e-07	9.23866	FBgn0033320	CG8586	CG8586	CG8586	35854	4252 // serine-type endopeptidase activity // non-traceable author statement /// 4263 // chymotrypsin activity // inferred from electronic annotation /// 4295 // trypsin activity // inferred from electronic annotation /// 4252 // serine-type endopeptidase activity // inferred from electronic annotation	6508 // proteolysis // inferred from electronic annotation	---	IPR001254 // Peptidase S1, chymotrypsin // 1.8E-54
10683	151882_at	-0.681613	1.99333	-7.61159	1.27e-08	1.86e-07	9.23681	FBgn0033093	CG3270	CG3270	CG3270	35575	16491 // oxidoreductase activity // inferred from electronic annotation	6118 // electron transport // inferred from electronic annotation /// 8152 // metabolism // inferred from electronic annotation	---	---
13043	154242_at	-0.507481	1.98497	-7.60889	1.28e-08	1.87e-07	9.22942	FBgn0027280	CG2206	l(1)G0193	lethal (1) G0193	31712	3924 // GTPase activity // inferred from electronic annotation /// 5525 // GTP binding // inferred from electronic annotation	6955 // immune response // inferred from electronic annotation	---	---
1013	142212_at	-0.829441	2.15286	-7.5998	1.31e-08	1.91e-07	9.20444	FBgn0010651	CG15095	l(2)08717	lethal (2) 08717	46085	5316 // high affinity inorganic phosphate:sodium symporter activity // inferred from sequence or structural similarity /// 5215 // transporter activity // inferred from electronic annotation /// 5316 // high affinity inorganic phosphate:sodium symporter activity // inferred from sequence similarity	5975 // carbohydrate metabolism // inferred from electronic annotation /// 6796 // phosphate metabolism // inferred from electronic annotation /// 6812 // cation transport // inferred from electronic annotation /// 6817 // phosphate transport // inferred from electronic annotation /// 6858 // extracellular transport // inferred from electronic annotation /// 6810 // transport // inferred from ele…	16021 // integral to membrane // inferred from electronic annotation /// 16020 // membrane // inferred from electronic annotation	IPR005828 // General substrate transporter // 9.5E-5
1048	142247_r_at	-0.5558	0.0732319	-7.58146	1.38e-08	1.99e-07	9.15406	FBgn0033798	CG15870	CG15870	CG15870	36446	---	---	---	---
9144	150343_at	-1.21314	3.67101	-7.56721	1.43e-08	2.07e-07	9.11487	FBgn0038930	CG5778	CG5778	CG5778	42598	---	---	---	---
10751	151950_at	-0.462181	0.734836	-7.56183	1.45e-08	2.1e-07	9.10005	FBgn0014032	CG12117	Sptr	Sepiapterin reductase	31781	4757 // sepiapterin reductase activity // inferred from sequence or structural similarity /// 4757 // sepiapterin reductase activity // inferred from electronic annotation /// 16491 // oxidoreductase activity // inferred from electronic annotation /// 4757 // sepiapterin reductase activity // inferred from sequence similarity	6729 // tetrahydrobiopterin biosynthesis // inferred from electronic annotation /// 8152 // metabolism // inferred from electronic annotation	---	---
13893	155092_at	-0.481963	0.45253	-7.56151	1.45e-08	2.1e-07	9.09919	FBgn0034351	CG5190	CG5190	CG5190	37124	5515 // protein binding // inferred from physical interaction /// 3723 // RNA binding // inferred from electronic annotation /// 8175 // tRNA methyltransferase activity // inferred from electronic annotation	8033 // tRNA processing // inferred from electronic annotation	---	IPR007356 // Protein of unknown function DUF425 // 1.3E-90
1396	142595_at	-0.505483	0.657384	-7.55753	1.47e-08	2.12e-07	9.08822	FBgn0051674	CG31674	CG31674	CG31674	318878	30267 // glyoxylate reductase (NADP) activity // inferred from sequence or structural similarity /// 16616 // oxidoreductase activity, acting on the CH-OH group of donors, NAD or NADP as acceptor // inferred from electronic annotation /// 51287 // NAD binding // inferred from electronic annotation /// 30267 // glyoxylate reductase (NADP) activity // inferred from sequence similarity	5975 // carbohydrate metabolism // inferred from electronic annotation /// 6564 // L-serine biosynthesis // inferred from electronic annotation /// 8152 // metabolism // inferred from electronic annotation	---	IPR006140 // D-isomer specific 2-hydroxyacid dehydrogenase, NAD binding domain // 1.6E-74 /// IPR006139 // D-isomer specific 2-hydroxyacid dehydrogenase, catalytic domain // 1.7E-23
10692	151891_at	-0.65922	0.179018	-7.52288	1.62e-08	2.32e-07	8.99282	FBgn0024997	CG2681	CG2681	CG2681	31258	4842 // ubiquitin-protein ligase activity // inferred from electronic annotation /// 8270 // zinc ion binding // inferred from electronic annotation	6511 // ubiquitin-dependent protein catabolism // inferred from electronic annotation /// 7275 // development // inferred from electronic annotation /// 16567 // protein ubiquitination // inferred from electronic annotation	151 // ubiquitin ligase complex // inferred from electronic annotation /// 5634 // nucleus // inferred from electronic annotation	IPR004162 // Seven in absentia protein family // 6.9E-123
7732	148931_at	-0.661023	2.41905	-7.52153	1.62e-08	2.33e-07	8.98911	FBgn0036696	CG14057	CG14057	CG14057	39915	4540 // ribonuclease activity // inferred from electronic annotation	8033 // tRNA processing // inferred from electronic annotation	---	IPR002759 // Ribonuclease P-related protein // 2.9E-48 /// IPR002759 // Ribonuclease P-related protein // 2.9E-48
572	141771_at	-0.620369	1.49505	-7.51961	1.63e-08	2.34e-07	8.9838	FBgn0050456	CG30456	CG30456	CG30456	36929	5085 // guanyl-nucleotide exchange factor activity // inferred from electronic annotation	---	---	IPR000219 // DH domain // 2.6E-5 /// IPR000219 // DH domain // 7.1E-5
37	141236_at	-0.507843	0.0602058	-7.51827	1.64e-08	2.34e-07	8.98012	FBgn0020312	CG4050	CG4050	CG4050	37401	16253 // UDP-N-acetylglucosamine-peptide N-acetylglucosaminyltransferase activity // inferred from sequence or structural similarity /// 5488 // binding // inferred from electronic annotation /// 16253 // UDP-N-acetylglucosamine-peptide N-acetylglucosaminyltransferase activity // inferred from sequence similarity	---	17122 // UDP-N-acetylglucosamine-peptide N-acetylglucosaminyltransferase complex // inferred from sequence or structural similarity /// 17122 // UDP-N-acetylglucosamine-peptide N-acetylglucosaminyltransferase complex // inferred from sequence similarity	IPR001440 // TPR repeat // 4.8E-8 /// IPR001440 // TPR repeat // 0.0016 /// IPR001440 // TPR repeat // 4.2E-6 /// IPR001440 // TPR repeat // 8.0E-11 /// IPR001440 // TPR repeat // 7.5E-6 /// IPR001440 // TPR repeat // 0.14 /// IPR001440 // TPR repeat // 0.0047
7817	149016_at	-0.674928	3.61607	-7.51782	1.64e-08	2.34e-07	8.97887	FBgn0036820	CG6852	CG6852	CG6852	40053	---	6118 // electron transport // inferred from electronic annotation /// 45454 // cell redox homeostasis // inferred from electronic annotation	---	IPR002109 // Glutaredoxin // 1.7E-32
7096	148295_at	-0.584779	2.6953	-7.51542	1.65e-08	2.35e-07	8.97226	FBgn0035726	CG9953	CG9953	CG9953	38763	4188 // serine-type Pro-X carboxypeptidase activity // inferred from sequence or structural similarity /// 3824 // catalytic activity // inferred from electronic annotation /// 8233 // peptidase activity // inferred from electronic annotation /// 8236 // serine-type peptidase activity // inferred from electronic annotation /// 4188 // serine-type Pro-X carboxypeptidase activity // inferred from s…	6508 // proteolysis // inferred from electronic annotation	5764 // lysosome // inferred from electronic annotation	IPR008758 // Peptidase S28 // 1.0E-126
10403	151602_at	-1.11259	2.09869	-7.51339	1.66e-08	2.36e-07	8.96668	---	---	---	---	---	5391 // sodium:potassium-exchanging ATPase activity // inferred from sequence or structural similarity /// 5391 // sodium:potassium-exchanging ATPase activity // non-traceable author statement /// 5524 // ATP binding // inferred from electronic annotation /// 15077 // monovalent inorganic cation transporter activity // inferred from electronic annotation /// 16820 // hydrolase activity, acting on…	1700 // embryonic development (sensu Insecta) // inferred from mutant phenotype /// 6812 // cation transport // non-traceable author statement /// 6874 // calcium ion homeostasis // inferred from electronic annotation /// 8152 // metabolism // inferred from electronic annotation /// 8360 // regulation of cell shape // inferred from mutant phenotype /// 15672 // monovalent inorganic cation transpo…	5886 // plasma membrane // inferred from direct assay /// 5886 // plasma membrane // inferred from sequence or structural similarity /// 5890 // sodium:potassium-exchanging ATPase complex // inferred from sequence or structural similarity /// 5890 // sodium:potassium-exchanging ATPase complex // non-traceable author statement /// 5918 // septate junction // inferred from direct assay /// 16020 //…	---
8572	149771_at	-0.505514	2.39396	-7.50582	1.69e-08	2.4e-07	8.94581	FBgn0038038	CG5167	CG5167	CG5167	41521	---	---	---	---
9140	150339_at	-0.605086	1.0952	-7.49815	1.73e-08	2.45e-07	8.92465	FBgn0038918	CG6690	CG6690	CG6690	42582	15926 // glucosidase activity // inferred from electronic annotation /// 16971 // flavin-linked sulfhydryl oxidase activity // inferred from sequence or structural similarity /// 16971 // flavin-linked sulfhydryl oxidase activity // inferred from sequence similarity	6118 // electron transport // inferred from electronic annotation /// 6464 // protein modification // inferred from electronic annotation	---	IPR006863 // Erv1/Alr // 1.7E-15
2968	144167_at	-0.556762	0.798006	-7.49145	1.76e-08	2.49e-07	8.90618	FBgn0026878	CG4325	CG4325	CG4325	31167	5515 // protein binding // inferred from electronic annotation /// 8270 // zinc ion binding // inferred from electronic annotation /// 46872 // metal ion binding // inferred from electronic annotation	6512 // ubiquitin cycle // inferred from electronic annotation	5634 // nucleus // inferred from electronic annotation	IPR001841 // Zn-finger, RING // 2.4E-12
12025	153224_at	-0.589302	2.40967	-7.4876	1.78e-08	2.51e-07	8.89553	FBgn0033128	CG12142	Tsp42Eg	Tetraspanin 42Eg	35616	---	---	16021 // integral to membrane // inferred from sequence or structural similarity /// 16021 // integral to membrane // inferred from electronic annotation /// 16021 // integral to membrane // inferred from sequence similarity	IPR000301 // CD9/CD37/CD63 antigen // 2.1E-45
180	141379_at	-0.850278	4.30758	-7.47664	1.83e-08	2.57e-07	8.86529	FBgn0015010	CG9538	Ag5r	Antigen 5-related	44631	---	6952 // defense response // inferred from electronic annotation	5576 // extracellular region // inferred from sequence or structural similarity /// 5576 // extracellular region // inferred from electronic annotation /// 5576 // extracellular region // inferred from sequence similarity	IPR001283 // Allergen V5/Tpx-1 related // 2.1E-40 /// IPR001283 // Allergen V5/Tpx-1 related // 1.0E-41
3648	144847_at	-0.742846	1.66084	-7.4745	1.84e-08	2.59e-07	8.85938	FBgn0030264	CG1961	CG1961	CG1961	32043	8081 // phosphoric diester hydrolase activity // inferred from electronic annotation /// 8253 // 5'-nucleotidase activity // inferred from sequence or structural similarity /// 19204 // nucleotide phosphatase activity // inferred from electronic annotation /// 16787 // hydrolase activity // inferred from electronic annotation /// 8253 // 5'-nucleotidase activity // inferred from sequence similari…	6139 // nucleobase, nucleoside, nucleotide and nucleic acid metabolism // inferred from electronic annotation /// 9166 // nucleotide catabolism // inferred from electronic annotation	---	IPR004843 // Metallo-phosphoesterase // 2.4E-15 /// IPR008334 // 5-Nucleotidase, C-terminal // 6.4E-66
5945	147144_at	-0.890377	1.43125	-7.47172	1.86e-08	2.6e-07	8.85172	FBgn0033826	CG4734	CG4734	CG4734	36477	---	---	---	---
12596	153795_at	-0.859083	3.26267	-7.46296	1.9e-08	2.66e-07	8.82752	FBgn0027338	CG9423	Kap-3	karyopherin 3	41158	8320 // protein carrier activity // non-traceable author statement /// 8565 // protein transporter activity // inferred from sequence or structural similarity /// 5488 // binding // inferred from electronic annotation /// 8565 // protein transporter activity // inferred from electronic annotation /// 8565 // protein transporter activity // inferred from sequence similarity	6606 // protein import into nucleus // inferred from sequence or structural similarity /// 6606 // protein import into nucleus // non-traceable author statement /// 6606 // protein import into nucleus // inferred from electronic annotation /// 6886 // intracellular protein transport // inferred from electronic annotation /// 6606 // protein import into nucleus // inferred from sequence similarity	5643 // nuclear pore // inferred from sequence or structural similarity /// 5643 // nuclear pore // non-traceable author statement /// 5643 // nuclear pore // inferred from sequence similarity	IPR000225 // Armadillo // 1.3E-12 /// IPR000225 // Armadillo // 4.8E-13 /// IPR000225 // Armadillo // 3.7E-6 /// IPR000225 // Armadillo // 5.7E-12 /// IPR000225 // Armadillo // 7.1E-10 /// IPR000225 // Armadillo // 5.1E-11 /// IPR000225 // Armadillo // 4.1E-7 /// IPR002652 // Importin alpha-like protein, beta-binding region // 6.4E-27
8096	149295_at	-0.723906	-0.299489	-7.4559	1.94e-08	2.7e-07	8.80802	FBgn0037278	CG14656	CG14656	CG14656	40597	---	---	---	---
6719	147918_at	-0.580937	0.512996	-7.45319	1.95e-08	2.72e-07	8.80055	FBgn0035122	CG13880	mRpL17	mitochondrial ribosomal protein L17	38046	3735 // structural constituent of ribosome // inferred from sequence or structural similarity /// 3735 // structural constituent of ribosome // inferred from electronic annotation /// 3735 // structural constituent of ribosome // inferred from sequence similarity	6412 // protein biosynthesis // inferred from sequence or structural similarity /// 6412 // protein biosynthesis // inferred from electronic annotation /// 6412 // protein biosynthesis // inferred from sequence similarity	5762 // mitochondrial large ribosomal subunit // inferred from sequence or structural similarity /// 5622 // intracellular // inferred from electronic annotation /// 5840 // ribosome // inferred from electronic annotation /// 30529 // ribonucleoprotein complex // inferred from electronic annotation /// 5762 // mitochondrial large ribosomal subunit // inferred from sequence similarity	---
111	141310_at	-1.13927	1.72116	-7.44843	1.98e-08	2.75e-07	8.78739	FBgn0039760	CG9682	CG9682	CG9682	43602	---	---	---	IPR004238 // Late embryogenesis abundant protein // 7.1E-9 /// IPR004238 // Late embryogenesis abundant protein // 2.1E-10
586	141785_at	-0.637441	2.1275	-7.44629	1.99e-08	2.77e-07	8.78146	FBgn0034243	CG6501	Ngp	Ngp	36989	5102 // receptor binding // inferred from electronic annotation /// 5525 // GTP binding // non-traceable author statement /// 5525 // GTP binding // inferred from electronic annotation	6886 // intracellular protein transport // inferred from electronic annotation /// 7166 // cell surface receptor linked signal transduction // inferred from electronic annotation /// 7242 // intracellular signaling cascade // inferred from electronic annotation	5634 // nucleus // non-traceable author statement /// 5622 // intracellular // inferred from electronic annotation	IPR002917 // GTP-binding protein, HSR1-related // 4.8E-102
10762	151961_at	-0.778031	1.5697	-7.44039	2.02e-08	2.81e-07	8.76517	FBgn0031327	CG5397	CG5397	CG5397	33313	4772 // sterol O-acyltransferase activity // inferred from sequence or structural similarity /// 16788 // hydrolase activity, acting on ester bonds // inferred from electronic annotation /// 3824 // catalytic activity // inferred from electronic annotation /// 4772 // sterol O-acyltransferase activity // inferred from sequence similarity	6952 // defense response // inferred from electronic annotation /// 7398 // ectoderm development // inferred from electronic annotation	---	IPR002018 // Carboxylesterase, type B // 1.6E-118
2977	144176_at	-0.924562	1.70658	-7.43997	2.03e-08	2.81e-07	8.76401	FBgn0027111	CG1221	miple	miple	38047	8083 // growth factor activity // inferred from electronic annotation	---	---	IPR000762 // PTN/MK heparin-binding protein // 5.8E-28
10496	151695_at	-0.601643	0.711559	-7.41607	2.16e-08	2.98e-07	8.69791	---	---	---	---	---	42802 // identical protein binding // inferred from physical interaction	1763 // morphogenesis of a branching structure // non-traceable author statement /// 7369 // gastrulation // non-traceable author statement /// 7424 // tracheal system development (sensu Insecta) // non-traceable author statement /// 7427 // tracheal epithelial cell migration (sensu Insecta) // traceable author statement /// 7428 // primary tracheal branching (sensu Insecta) // traceable author s…	5622 // intracellular // traceable author statement /// 5737 // cytoplasm // non-traceable author statement /// 5737 // cytoplasm // traceable author statement	---
3132	144331_at	-0.63591	0.931323	-7.41498	2.17e-08	2.98e-07	8.69489	FBgn0028949	CG15254	CG15254	CG15254	34915	4222 // metalloendopeptidase activity // inferred from sequence or structural similarity /// 8270 // zinc ion binding // inferred from electronic annotation /// 8533 // astacin activity // inferred from electronic annotation /// 8237 // metallopeptidase activity // inferred from electronic annotation /// 4222 // metalloendopeptidase activity // inferred from sequence similarity	6508 // proteolysis // inferred from electronic annotation	---	IPR001506 // Peptidase M12A, astacin // 5.2E-75
6572	147771_at	-0.8319	1.58766	-7.41508	2.17e-08	2.98e-07	8.69519	FBgn0041712	CG9889	yellow-d	yellow-d	37703	---	---	---	IPR003534 // Major royal jelly protein // 1.0E-126
955	142154_at	-0.620421	2.64949	-7.39816	2.27e-08	3.11e-07	8.64836	FBgn0014396	CG3234	tim	timeless	---	5515 // protein binding // traceable author statement	7617 // mating behavior // inferred from mutant phenotype /// 7620 // copulation // inferred from mutant phenotype /// 45187 // regulation of circadian sleep/wake cycle, sleep // inferred from mutant phenotype /// 48512 // circadian behavior // inferred from mutant phenotype /// 48511 // rhythmic process // inferred from electronic annotation /// 7622 // rhythmic behavior // traceable author stat…	5634 // nucleus // inferred from electronic annotation /// 5634 // nucleus // traceable author statement /// 5737 // cytoplasm // traceable author statement /// 5634 // nucleus // non-traceable author statement /// 5737 // cytoplasm // non-traceable author statement	IPR006906 // Timeless protein // 2.5E-123 /// IPR006906 // Timeless protein // 1.0E-126 /// IPR006906 // Timeless protein // 1.0E-126
11712	152911_at	-1.36609	5.89004	-7.39385	2.3e-08	3.14e-07	8.63641	FBgn0043044	CG5887	desat1	desat1	117369	4768 // stearoyl-CoA 9-desaturase activity // inferred from sequence or structural similarity /// 4768 // stearoyl-CoA 9-desaturase activity // non-traceable author statement /// 5506 // iron ion binding // inferred from electronic annotation /// 4768 // stearoyl-CoA 9-desaturase activity // inferred from electronic annotation /// 16491 // oxidoreductase activity // inferred from electronic annot…	6633 // fatty acid biosynthesis // non-traceable author statement /// 6633 // fatty acid biosynthesis // inferred from electronic annotation /// 8610 // lipid biosynthesis // inferred from electronic annotation	5783 // endoplasmic reticulum // inferred from electronic annotation /// 16020 // membrane // inferred from electronic annotation /// 16021 // integral to membrane // inferred from electronic annotation	IPR005804 // Fatty acid desaturase // 2.0E-87
13144	154343_at	-0.577503	2.45465	-7.38412	2.36e-08	3.22e-07	8.60947	FBgn0030594	CG9509	CG9509	CG9509	32420	8812 // choline dehydrogenase activity // inferred from sequence or structural similarity /// 50660 // FAD binding // inferred from electronic annotation /// 16491 // oxidoreductase activity // inferred from electronic annotation /// 16614 // oxidoreductase activity, acting on CH-OH group of donors // inferred from electronic annotation /// 8812 // choline dehydrogenase activity // inferred from …	6118 // electron transport // inferred from electronic annotation /// 7498 // mesoderm development // inferred from expression pattern	---	IPR000172 // Glucose-methanol-choline oxidoreductase // 2.5E-86 /// IPR007867 // GMC oxidoreductase // 2.5E-35
13855	155054_at	-0.862929	1.4301	-7.38418	2.36e-08	3.22e-07	8.60962	FBgn0037219	CG18143	CG18143	CG18143	40528	5509 // calcium ion binding // inferred from electronic annotation /// 8892 // guanine deaminase activity // inferred from sequence or structural similarity /// 5515 // protein binding // inferred from physical interaction /// 16787 // hydrolase activity // inferred from electronic annotation /// 8892 // guanine deaminase activity // inferred from sequence similarity	6144 // purine base metabolism // inferred from electronic annotation	---	IPR006680 // Amidohydrolase // 1.1E-51
8113	149312_at	-0.688356	3.77625	-7.37831	2.4e-08	3.26e-07	8.59338	FBgn0037298	CG2604	CG2604	CG2604	40623	---	---	---	IPR001282 // Glucose-6-phosphate dehydrogenase // 3.1E-4
13898	155097_at	-0.359783	0.800034	-7.37715	2.41e-08	3.27e-07	8.59015	FBgn0030801	CG4875	CG4875	CG4875	32678	4930 // G-protein coupled receptor activity // inferred from sequence or structural similarity /// 4930 // G-protein coupled receptor activity // inferred from sequence similarity	---	---	---
12781	153980_at	-0.556693	1.4214	-7.37475	2.42e-08	3.29e-07	8.5835	FBgn0026150	CG6291	ApepP	Aminopeptidase P	35029	4177 // aminopeptidase activity // inferred from direct assay /// 4177 // aminopeptidase activity // inferred from sequence or structural similarity /// 8235 // metalloexopeptidase activity // inferred from electronic annotation /// 8237 // metallopeptidase activity // inferred from electronic annotation /// 8451 // X-Pro aminopeptidase activity // inferred from direct assay /// 4177 // aminopept…	6508 // proteolysis // inferred from electronic annotation	5829 // cytosol // inferred from direct assay	---
789	141988_at	-0.557469	0.366153	-7.36161	2.51e-08	3.4e-07	8.5471	---	---	---	---	---	---	---	---	---
12034	153233_at	-1.063	4.2987	-7.3613	2.52e-08	3.4e-07	8.54623	FBgn0033875	CG6357	CG6357	CG6357	36532	4217 // cathepsin L activity // inferred from sequence or structural similarity /// 4217 // cathepsin L activity // inferred from sequence similarity	---	---	---
13951	155150_at	-0.563689	3.54068	-7.35436	2.56e-08	3.45e-07	8.52697	---	CG6782 /// CG6783	---	---	---	5371 // tricarboxylate carrier activity // inferred from sequence or structural similarity /// 5386 // carrier activity // inferred from sequence or structural similarity /// 5215 // transporter activity // inferred from electronic annotation /// 5504 // fatty acid binding // inferred from sequence or structural similarity /// 5488 // binding // inferred from electronic annotation /// 8289 // lip…	6810 // transport // inferred from electronic annotation	5740 // mitochondrial envelope // inferred from sequence or structural similarity /// 5743 // mitochondrial inner membrane // inferred from electronic annotation /// 16020 // membrane // inferred from electronic annotation /// 16021 // integral to membrane // inferred from electronic annotation	---
11434	152633_at	-0.50272	2.57797	-7.34047	2.66e-08	3.58e-07	8.48845	FBgn0003116	CG3461	pn	prune	31194	16462 // pyrophosphatase activity // inferred from electronic annotation	48072 // eye pigmentation (sensu Endopterygota) // inferred from mutant phenotype	5737 // cytoplasm // inferred from electronic annotation	IPR004097 // DHHA2 domain // 8.2E-63 /// IPR004097 // DHHA2 domain // 8.2E-63
13772	154971_at	-0.63694	2.5734	-7.33672	2.69e-08	3.61e-07	8.47806	FBgn0031320	CG5126	CG5126	CG5126	33306	16301 // kinase activity // inferred from electronic annotation /// 16740 // transferase activity // inferred from electronic annotation	---	---	IPR004119 // Protein of unknown function DUF227 // 1.8E-16
4792	145991_at	-0.854613	0.0454755	-7.33199	2.73e-08	3.66e-07	8.46492	FBgn0031959	CG7104	Spz3	Spz3	34077	5515 // protein binding // inferred from physical interaction	---	---	---
10281	151480_at	-0.597755	1.50665	-7.33133	2.73e-08	3.66e-07	8.4631	FBgn0040322	CG4144	GNBP2	Gram-negative bacteria binding protein 2	40033	8329 // pattern recognition receptor activity // inferred from sequence or structural similarity /// 8329 // pattern recognition receptor activity // non-traceable author statement /// 8368 // Gram-negative bacterial binding // non-traceable author statement /// 15926 // glucosidase activity // inferred from electronic annotation /// 8367 // bacterial binding // inferred from sequence or structur…	5976 // polysaccharide metabolism // inferred from electronic annotation /// 6952 // defense response // non-traceable author statement /// 42830 // defense response to pathogenic bacteria // inferred from sequence or structural similarity /// 45088 // regulation of innate immune response // inferred from sequence or structural similarity /// 6955 // immune response // inferred from electronic an…	5576 // extracellular region // inferred from sequence or structural similarity	IPR000757 // Glycoside hydrolase, family 16 // 3.7E-4 /// IPR000757 // Glycoside hydrolase, family 16 // 3.7E-4 /// IPR000757 // Glycoside hydrolase, family 16 // 3.7E-4
11289	152488_at	-0.684554	3.23538	-7.33014	2.74e-08	3.67e-07	8.45978	FBgn0040502	CG8343	CG8343	CG8343	35544	5537 // mannose binding // inferred from sequence or structural similarity /// 5529 // sugar binding // inferred from electronic annotation /// 5537 // mannose binding // inferred from sequence similarity	---	---	IPR001304 // C-type lectin // 2.5E-17
8994	150193_at	-1.45983	2.98516	-7.32333	2.79e-08	3.74e-07	8.44088	FBgn0038702	CG3739	CG3739	CG3739	42320	8236 // serine-type peptidase activity // inferred from sequence or structural similarity /// 3824 // catalytic activity // inferred from electronic annotation /// 8236 // serine-type peptidase activity // inferred from electronic annotation /// 8236 // serine-type peptidase activity // inferred from sequence similarity	6508 // proteolysis // inferred from electronic annotation	---	IPR008758 // Peptidase S28 // 1.0E-126 /// IPR008758 // Peptidase S28 // 1.0E-126
11527	152726_at	-0.883929	1.63778	-7.30782	2.91e-08	3.88e-07	8.39782	FBgn0033271	CG8708	CG8708	CG8708	35792	16740 // transferase activity // inferred from electronic annotation /// 16757 // transferase activity, transferring glycosyl groups // inferred from electronic annotation /// 48531 // beta-1,3-galactosyltransferase activity // inferred from direct assay	6464 // protein modification // inferred from electronic annotation /// 6486 // protein amino acid glycosylation // inferred from direct assay /// 6486 // protein amino acid glycosylation // inferred from electronic annotation /// 19538 // protein metabolism // inferred from electronic annotation	---	---
6820	148019_at	-0.498414	1.58556	-7.29006	3.06e-08	4.04e-07	8.34847	FBgn0035300	CG1139	CG1139	CG1139	38264	5279 // amino acid-polyamine transporter activity // inferred from electronic annotation /// 15171 // amino acid transporter activity // inferred from sequence or structural similarity /// 15171 // amino acid transporter activity // inferred from sequence similarity	6520 // amino acid metabolism // inferred from electronic annotation /// 6865 // amino acid transport // inferred from electronic annotation	16020 // membrane // inferred from electronic annotation	IPR002422 // Amino acid/polyamine transporter II // 5.2E-59
10246	151445_at	-0.937627	3.91259	-7.27721	3.17e-08	4.18e-07	8.31274	FBgn0040985	CG6115	CG6115	CG6115	50459	---	---	---	IPR008011 // Complex 1 LYR protein // 6.7E-21
8677	149876_at	-0.497581	0.261417	-7.27636	3.18e-08	4.18e-07	8.31038	FBgn0038203	CG14360	Or88a	Odorant receptor 88a	41715	4984 // olfactory receptor activity // non-traceable author statement /// 5549 // odorant binding // inferred from electronic annotation	7608 // sensory perception of smell // non-traceable author statement	16021 // integral to membrane // non-traceable author statement	IPR004117 // Olfactory receptor, Drosophila // 1.4E-90
5287	146486_at	-0.70078	1.22046	-7.27084	3.23e-08	4.24e-07	8.29503	FBgn0032770	CG13086	CG13086	CG13086	35208	---	---	---	---
5282	146481_at	-0.460367	1.24552	-7.26956	3.24e-08	4.25e-07	8.29146	FBgn0032762	CG10685	CG10685	CG10685	35196	3676 // nucleic acid binding // inferred from electronic annotation /// 3677 // DNA binding // inferred from electronic annotation /// 3899 // DNA-directed RNA polymerase activity // inferred from sequence or structural similarity /// 46983 // protein dimerization activity // inferred from electronic annotation /// 3899 // DNA-directed RNA polymerase activity // inferred from sequence similarity	6360 // transcription from RNA polymerase I promoter // inferred from sequence or structural similarity /// 6366 // transcription from RNA polymerase II promoter // inferred from electronic annotation /// 9299 // mRNA transcription // inferred from electronic annotation /// 6360 // transcription from RNA polymerase I promoter // inferred from sequence similarity	5736 // DNA-directed RNA polymerase I complex // Unknown /// 5736 // DNA-directed RNA polymerase I complex // inferred from curator	IPR008193 // DNA-directed RNA polymerase, 13 to 16 kDa subunit // 1.1E-16
10917	152116_at	-0.632096	3.164	-7.26794	3.25e-08	4.26e-07	8.28695	FBgn0020414	CG4559	Idgf3	Imaginal disc growth factor 3	34981	4568 // chitinase activity // inferred from sequence or structural similarity /// 8084 // imaginal disc growth factor activity // inferred from direct assay /// 16799 // hydrolase activity, hydrolyzing N-glycosyl compounds // inferred from electronic annotation /// 4553 // hydrolase activity, hydrolyzing O-glycosyl compounds // inferred from electronic annotation /// 4568 // chitinase activity //…	7165 // signal transduction // inferred from electronic annotation /// 7267 // cell-cell signaling // inferred from electronic annotation /// 7444 // imaginal disc development // inferred from direct assay /// 8152 // metabolism // inferred from electronic annotation /// 5975 // carbohydrate metabolism // inferred from electronic annotation /// 6032 // chitin catabolism // inferred from electroni…	5576 // extracellular region // inferred from direct assay /// 5576 // extracellular region // non-traceable author statement	IPR001223 // Glycoside hydrolase, family 18 // 1.5E-97
12063	153262_at	-0.5673	1.64014	-7.26115	3.31e-08	4.34e-07	8.26805	FBgn0036998	CG5969	CG5969	CG5969	40269	5515 // protein binding // inferred from physical interaction	---	---	---
8582	149781_at	-0.331126	0.278613	-7.25644	3.36e-08	4.39e-07	8.25497	FBgn0038055	CG5333	CG5333	CG5333	41540	---	6915 // apoptosis // inferred from electronic annotation	5737 // cytoplasm // inferred from electronic annotation	IPR007320 // Programmed cell death protein 2, C-terminal // 4.1E-5
488	141687_at	-0.637554	3.12498	-7.25154	3.4e-08	4.45e-07	8.24131	FBgn0003507	CG3992	srp	serpent	41944	3677 // DNA binding // inferred from direct assay /// 3677 // DNA binding // traceable author statement /// 3700 // transcription factor activity // inferred from electronic annotation /// 3702 // RNA polymerase II transcription factor activity // inferred from sequence or structural similarity /// 5515 // protein binding // inferred from physical interaction /// 16251 // general RNA polymerase I…	1700 // embryonic development (sensu Insecta) // non-traceable author statement /// 1706 // endoderm formation // traceable author statement /// 1709 // cell fate determination // traceable author statement /// 1710 // mesodermal cell fate commitment // inferred from mutant phenotype /// 6355 // regulation of transcription, DNA-dependent // inferred from sequence or structural similarity /// 6357…	5634 // nucleus // non-traceable author statement /// 5634 // nucleus // inferred from electronic annotation	IPR000679 // Zn-finger, GATA type // 3.4E-20 /// IPR000679 // Zn-finger, GATA type // 6.4E-22 /// IPR000679 // Zn-finger, GATA type // 6.4E-22
9251	150450_at	-0.615487	1.02397	-7.24626	3.45e-08	4.51e-07	8.22663	FBgn0039084	CG10175	CG10175	CG10175	42773	4091 // carboxylesterase activity // inferred from sequence or structural similarity /// 3824 // catalytic activity // inferred from electronic annotation /// 4759 // serine esterase activity // inferred from electronic annotation /// 4091 // carboxylesterase activity // inferred from sequence similarity	---	---	IPR002018 // Carboxylesterase, type B // 1.0E-126 /// IPR002018 // Carboxylesterase, type B // 1.0E-126 /// IPR002018 // Carboxylesterase, type B // 1.0E-126
10340	151539_at	-0.763867	2.82661	-7.24283	3.49e-08	4.54e-07	8.21706	FBgn0050359	CG30359	CG30359	CG30359	35828	4556 // alpha-amylase activity // inferred from electronic annotation /// 5215 // transporter activity // inferred from electronic annotation /// 15926 // glucosidase activity // inferred from electronic annotation /// 16787 // hydrolase activity // inferred from electronic annotation	5975 // carbohydrate metabolism // inferred from electronic annotation	---	IPR006047 // Alpha amylase, catalytic domain // 1.0E-126
3133	144332_at	-0.855441	2.11749	-7.24124	3.5e-08	4.56e-07	8.21264	FBgn0028950	CG15255	CG15255	CG15255	34913	4222 // metalloendopeptidase activity // inferred from sequence or structural similarity /// 8270 // zinc ion binding // inferred from electronic annotation /// 8533 // astacin activity // inferred from electronic annotation /// 8237 // metallopeptidase activity // inferred from electronic annotation /// 4222 // metalloendopeptidase activity // inferred from sequence similarity	6508 // proteolysis // inferred from electronic annotation	---	IPR001506 // Peptidase M12A, astacin // 6.3E-67 /// IPR001506 // Peptidase M12A, astacin // 6.3E-67
8311	149510_at	-0.494845	-0.0355825	-7.23976	3.52e-08	4.57e-07	8.20852	FBgn0037600	CG8007	CG8007	CG8007	41017	16609 // G-protein coupled serotonin receptor activity // inferred from sequence or structural similarity /// 16609 // G-protein coupled serotonin receptor activity // inferred from sequence similarity	7210 // serotonin receptor signaling pathway // inferred from sequence or structural similarity /// 19226 // transmission of nerve impulse // inferred from electronic annotation /// 7210 // serotonin receptor signaling pathway // inferred from sequence similarity	16021 // integral to membrane // inferred from sequence or structural similarity /// 16021 // integral to membrane // inferred from sequence similarity	IPR000276 // Rhodopsin-like GPCR superfamily // 5.7E-68 /// IPR000276 // Rhodopsin-like GPCR superfamily // 5.1E-68
8864	150063_at	-0.621911	0.406108	-7.22897	3.62e-08	4.69e-07	8.17846	---	---	---	---	---	---	---	---	---
12732	153931_at	-0.620139	2.35988	-7.22104	3.7e-08	4.79e-07	8.15636	FBgn0013720	CG14779	pck	pickel	31101	5198 // structural molecule activity // inferred from electronic annotation	7018 // microtubule-based movement // inferred from electronic annotation /// 7424 // tracheal system development (sensu Insecta) // inferred from mutant phenotype /// 19991 // septate junction assembly // inferred from mutant phenotype /// 35151 // regulation of tracheal tube size // inferred from mutant phenotype	5874 // microtubule // inferred from electronic annotation	---
5815	147014_at	-0.962933	1.52473	-7.21237	3.79e-08	4.9e-07	8.1322	FBgn0043470	CG12350	Try	Try	36214	4263 // chymotrypsin activity // inferred from electronic annotation /// 4295 // trypsin activity // inferred from sequence or structural similarity /// 4295 // trypsin activity // non-traceable author statement /// 4252 // serine-type endopeptidase activity // inferred from electronic annotation /// 4295 // trypsin activity // inferred from electronic annotation /// 8233 // peptidase activity //…	6508 // proteolysis // non-traceable author statement /// 6508 // proteolysis // inferred from electronic annotation	5576 // extracellular region // inferred from sequence or structural similarity /// 5576 // extracellular region // inferred from sequence similarity	IPR001254 // Peptidase S1, chymotrypsin // 2.5E-81
940	142139_at	-1.2576	2.89332	-7.20851	3.83e-08	4.94e-07	8.12145	FBgn0040349	CG3699	CG3699	CG3699	31046	16614 // oxidoreductase activity, acting on CH-OH group of donors // inferred from sequence or structural similarity /// 16491 // oxidoreductase activity // inferred from electronic annotation /// 16614 // oxidoreductase activity, acting on CH-OH group of donors // inferred from sequence similarity	8152 // metabolism // inferred from electronic annotation	---	IPR002198 // Short-chain dehydrogenase/reductase SDR // 4.1E-83
8741	149940_at	-0.520359	0.508583	-7.20828	3.84e-08	4.94e-07	8.1208	FBgn0038302	CG4210	CG4210	CG4210	41832	8080 // N-acetyltransferase activity // inferred from electronic annotation	---	---	IPR000182 // GCN5-related N-acetyltransferase // 3.4E-21 /// IPR000182 // GCN5-related N-acetyltransferase // 3.4E-21
10806	152005_at	-0.484119	0.679321	-7.20673	3.85e-08	4.96e-07	8.11649	FBgn0038946	CG7077	CG7077	CG7077	42614	16616 // oxidoreductase activity, acting on the CH-OH group of donors, NAD or NADP as acceptor // inferred from sequence or structural similarity /// 16491 // oxidoreductase activity // inferred from electronic annotation /// 16616 // oxidoreductase activity, acting on the CH-OH group of donors, NAD or NADP as acceptor // inferred from sequence similarity	8152 // metabolism // inferred from electronic annotation	---	IPR002198 // Short-chain dehydrogenase/reductase SDR // 6.4E-46
9199	150398_at	-0.408313	0.0868818	-7.20521	3.87e-08	4.97e-07	8.11225	FBgn0039022	CG4725	CG4725	CG4725	42699	4245 // neprilysin activity // inferred from electronic annotation /// 16511 // endothelin-converting enzyme activity // inferred from sequence or structural similarity /// 8237 // metallopeptidase activity // inferred from electronic annotation /// 16511 // endothelin-converting enzyme activity // inferred from sequence similarity	6508 // proteolysis // inferred from electronic annotation /// 7165 // signal transduction // inferred from electronic annotation	16020 // membrane // inferred from electronic annotation	IPR008753 // Peptidase M13 // 5.0E-6 /// IPR000718 // Peptidase M13, neprilysin // 1.2E-6
13597	154796_at	-0.513622	1.96098	-7.18644	4.07e-08	5.21e-07	8.0599	FBgn0037203	CG11128	slif	slimfast	40510	15171 // amino acid transporter activity // non-traceable author statement /// 15326 // cationic amino acid transporter activity // inferred from sequence or structural similarity /// 15326 // cationic amino acid transporter activity // traceable author statement /// 5515 // protein binding // inferred from physical interaction /// 5279 // amino acid-polyamine transporter activity // inferred fro…	6520 // amino acid metabolism // inferred from electronic annotation /// 6865 // amino acid transport // inferred from electronic annotation /// 6865 // amino acid transport // traceable author statement /// 40007 // growth // traceable author statement /// 6810 // transport // inferred from electronic annotation	16020 // membrane // inferred from electronic annotation /// 16021 // integral to membrane // inferred from electronic annotation	IPR004841 // Amino acid permease-associated region // 7.6E-17
10949	152148_at	-0.831034	2.1826	-7.18586	4.08e-08	5.22e-07	8.05829	FBgn0053307	CG33307	CG33307	CG33307	2768914	---	---	---	---
12630	153829_at	-0.85902	2.5633	-7.17894	4.16e-08	5.31e-07	8.03898	FBgn0037218 /// FBgn0067998	CG1107	auxillin /// Dyakauxillin	auxillin /// auxillin	40527	4672 // protein kinase activity // non-traceable author statement /// 4674 // protein serine/threonine kinase activity // inferred from electronic annotation /// 4702 // receptor signaling protein serine/threonine kinase activity // inferred from electronic annotation /// 5524 // ATP binding // inferred from electronic annotation /// 31072 // heat shock protein binding // inferred from electronic…	6468 // protein amino acid phosphorylation // non-traceable author statement /// 6886 // intracellular protein transport // inferred from electronic annotation /// 16191 // synaptic vesicle uncoating // traceable author statement /// 19538 // protein metabolism // inferred from electronic annotation	---	IPR001623 // Heat shock protein DnaJ, N-terminal // 1.6E-8 /// IPR000719 // Protein kinase // 6.2E-52
2044	143243_at	-0.906506	1.99703	-7.17752	4.18e-08	5.32e-07	8.03502	FBgn0002571	CG8695	LvpL	Larval visceral protein L	35826	4556 // alpha-amylase activity // inferred from electronic annotation /// 4558 // alpha-glucosidase activity // inferred from sequence or structural similarity /// 4558 // alpha-glucosidase activity // non-traceable author statement /// 5215 // transporter activity // inferred from electronic annotation /// 4558 // alpha-glucosidase activity // inferred from electronic annotation /// 16787 // hyd…	6006 // glucose metabolism // non-traceable author statement /// 5975 // carbohydrate metabolism // inferred from electronic annotation	---	IPR006047 // Alpha amylase, catalytic domain // 1.0E-126
2509	143708_at	-0.688874	2.85583	-7.16402	4.34e-08	5.52e-07	7.99734	FBgn0013347	CG5163	TfIIA-S	Transcription-factor-IIA-S	42822	16251 // general RNA polymerase II transcription factor activity // inferred from sequence or structural similarity /// 3702 // RNA polymerase II transcription factor activity // inferred from electronic annotation /// 16251 // general RNA polymerase II transcription factor activity // inferred from sequence similarity	6357 // regulation of transcription from RNA polymerase II promoter // non-traceable author statement /// 6367 // transcription initiation from RNA polymerase II promoter // inferred from sequence or structural similarity /// 6367 // transcription initiation from RNA polymerase II promoter // inferred from electronic annotation /// 6367 // transcription initiation from RNA polymerase II promoter …	5634 // nucleus // non-traceable author statement /// 5672 // transcription factor TFIIA complex // inferred from sequence or structural similarity /// 5672 // transcription factor TFIIA complex // inferred from electronic annotation /// 5672 // transcription factor TFIIA complex // inferred from sequence similarity	IPR003194 // Transcription initiation factor IIA, gamma subunit // 5.0E-29 /// IPR003194 // Transcription initiation factor IIA, gamma subunit // 1.5E-26
10654	151853_at	-0.521935	3.6043	-7.16298	4.35e-08	5.52e-07	7.99442	FBgn0027610	CG8790	CG8790	CG8790	41640	5310 // dicarboxylic acid transporter activity // inferred from sequence or structural similarity /// 5386 // carrier activity // inferred from sequence or structural similarity /// 5488 // binding // inferred from electronic annotation /// 5310 // dicarboxylic acid transporter activity // inferred from sequence similarity /// 5386 // carrier activity // inferred from sequence similarity	6810 // transport // inferred from electronic annotation	5739 // mitochondrion // inferred from sequence or structural similarity /// 5740 // mitochondrial envelope // inferred from sequence or structural similarity /// 5743 // mitochondrial inner membrane // inferred from electronic annotation /// 16020 // membrane // inferred from electronic annotation /// 16021 // integral to membrane // inferred from electronic annotation /// 5739 // mitochondrion …	IPR001993 // Mitochondrial substrate carrier // 5.1E-21 /// IPR001993 // Mitochondrial substrate carrier // 1.4E-21 /// IPR001993 // Mitochondrial substrate carrier // 1.2E-24
11227	152426_at	-0.571679	3.69117	-7.16259	4.35e-08	5.52e-07	7.99335	FBgn0036211	CG5946	CG5946	CG5946	39336	4128 // cytochrome-b5 reductase activity // inferred from sequence or structural similarity /// 4128 // cytochrome-b5 reductase activity // inferred from electronic annotation /// 16491 // oxidoreductase activity // inferred from electronic annotation /// 50660 // FAD binding // inferred from electronic annotation /// 51287 // NAD binding // inferred from electronic annotation /// 5506 // iron io…	6118 // electron transport // inferred from electronic annotation /// 6636 // fatty acid desaturation // inferred from electronic annotation /// 8203 // cholesterol metabolism // inferred from electronic annotation /// 6810 // transport // inferred from electronic annotation /// 6886 // intracellular protein transport // inferred from electronic annotation	19028 // viral capsid // inferred from electronic annotation /// 30125 // clathrin vesicle coat // inferred from electronic annotation	IPR008333 // Oxidoreductase FAD-binding region // 3.5E-59 /// IPR001433 // Oxidoreductase FAD/NAD(P)-binding // 7.4E-45 /// IPR008333 // Oxidoreductase FAD-binding region // 3.5E-59 /// IPR001433 // Oxidoreductase FAD/NAD(P)-binding // 7.4E-45
3159	144358_at	-0.634544	1.40531	-7.15496	4.45e-08	5.63e-07	7.97202	FBgn0040339	CG3034	MED22	Mediator complex subunit 22	31038	16455 // RNA polymerase II transcription mediator activity // inferred from sequence or structural similarity /// 5515 // protein binding // inferred from physical interaction /// 16455 // RNA polymerase II transcription mediator activity // inferred from sequence similarity	---	---	IPR009332 // Surfeit locus 5 // 9.0E-91
10690	151889_at	-0.463452	0.534979	-7.15496	4.45e-08	5.63e-07	7.97204	FBgn0000077	CG12127	amx	almondex	43869	3676 // nucleic acid binding // inferred from electronic annotation /// 4520 // endodeoxyribonuclease activity // inferred from electronic annotation /// 4521 // endoribonuclease activity // inferred from electronic annotation /// 5529 // sugar binding // inferred from electronic annotation	6260 // DNA replication // inferred from electronic annotation /// 7398 // ectoderm development // traceable author statement /// 7498 // mesoderm development // inferred from mutant phenotype	5886 // plasma membrane // inferred from sequence or structural similarity /// 5886 // plasma membrane // inferred from sequence similarity	IPR007829 // TM2 // 6.9E-21
13638	154837_at	-0.354419	1.27617	-7.15435	4.45e-08	5.63e-07	7.97034	FBgn0034275	CG5002	CG5002	CG5002	37025	5215 // transporter activity // non-traceable author statement /// 15381 // high affinity sulfate permease activity // inferred from sequence or structural similarity /// 5515 // protein binding // inferred from physical interaction /// 5215 // transporter activity // inferred from electronic annotation /// 15381 // high affinity sulfate permease activity // inferred from sequence similarity	6790 // sulfur metabolism // inferred from electronic annotation /// 6820 // anion transport // inferred from electronic annotation /// 6858 // extracellular transport // inferred from electronic annotation /// 6810 // transport // inferred from electronic annotation	16020 // membrane // inferred from electronic annotation /// 16021 // integral to membrane // inferred from electronic annotation	IPR001902 // Sulphate transporter // 2.4E-65
4250	145449_at	-0.454033	0.643805	-7.14619	4.55e-08	5.73e-07	7.94753	FBgn0031140	CG12092	NPC1b	NPC1b	33072	4197 // cysteine-type endopeptidase activity // inferred from electronic annotation /// 4872 // receptor activity // inferred from electronic annotation /// 8158 // hedgehog receptor activity // inferred from electronic annotation	6508 // proteolysis // inferred from electronic annotation /// 6629 // lipid metabolism // inferred from electronic annotation /// 6869 // lipid transport // inferred from electronic annotation	5886 // plasma membrane // inferred from sequence or structural similarity /// 5886 // plasma membrane // inferred from sequence similarity	IPR003392 // Patched family // 6.5E-29 /// IPR003392 // Patched family // 4.5E-7
5089	146288_at	-0.763433	0.911391	-7.14398	4.58e-08	5.76e-07	7.94136	FBgn0032435	CG6417	Oatp33Eb	Organic anion transporting polypeptide 33Eb	34662	8514 // organic anion transporter activity // inferred from sequence or structural similarity /// 15347 // sodium-independent organic anion transporter activity // inferred from sequence or structural similarity /// 5215 // transporter activity // inferred from electronic annotation /// 8514 // organic anion transporter activity // inferred from sequence similarity /// 15347 // sodium-independent…	6820 // anion transport // inferred from electronic annotation /// 15711 // organic anion transport // inferred from sequence or structural similarity /// 6810 // transport // inferred from electronic annotation /// 15711 // organic anion transport // inferred from sequence similarity	16020 // membrane // inferred from electronic annotation	IPR004157 // Organic anion transporter polypeptide (OATP), C-terminal // 1.4E-8 /// IPR004157 // Organic anion transporter polypeptide (OATP), C-terminal // 3.0E-15
11321	152520_at	-0.633641	1.16412	-7.13721	4.67e-08	5.86e-07	7.92244	FBgn0034094	CG3666	Tsf3	Transferrin 3	36800	5381 // iron ion transporter activity // non-traceable author statement /// 5386 // carrier activity // inferred from electronic annotation /// 5488 // binding // inferred from electronic annotation /// 8199 // ferric iron binding // inferred from electronic annotation	6811 // ion transport // inferred from electronic annotation /// 6826 // iron ion transport // inferred from electronic annotation /// 6879 // iron ion homeostasis // inferred from electronic annotation /// 9617 // response to bacteria // inferred from expression pattern /// 19725 // cell homeostasis // inferred from electronic annotation	5576 // extracellular region // inferred from electronic annotation	---
8852	150051_at	-0.787797	-0.0307622	-7.13276	4.73e-08	5.93e-07	7.91002	FBgn0038482	CG4053	CG4053	CG4053	42070	4252 // serine-type endopeptidase activity // non-traceable author statement /// 4263 // chymotrypsin activity // inferred from electronic annotation /// 4295 // trypsin activity // inferred from sequence or structural similarity /// 4295 // trypsin activity // inferred from sequence similarity	6508 // proteolysis // non-traceable author statement	---	IPR001254 // Peptidase S1, chymotrypsin // 4.4E-58
9231	150430_at	-0.509306	-0.0292882	-7.12889	4.78e-08	5.98e-07	7.89918	FBgn0039060	CG13836	CG13836	CG13836	42741	---	---	---	---
9205	150404_at	-0.568578	2.29012	-7.12852	4.78e-08	5.98e-07	7.89814	FBgn0039031	CG17244	CG17244	CG17244	42709	5515 // protein binding // inferred from physical interaction	---	---	---
5627	146826_at	-0.746125	0.190411	-7.1281	4.79e-08	5.99e-07	7.89699	FBgn0001285	CG8579	Jon44E	Jonah 44E	35853	4263 // chymotrypsin activity // inferred from sequence or structural similarity /// 4263 // chymotrypsin activity // non-traceable author statement /// 4295 // trypsin activity // inferred from electronic annotation /// 4252 // serine-type endopeptidase activity // inferred from electronic annotation /// 8233 // peptidase activity // inferred from electronic annotation /// 16787 // hydrolase act…	6508 // proteolysis // non-traceable author statement /// 6508 // proteolysis // inferred from electronic annotation	---	IPR001254 // Peptidase S1, chymotrypsin // 2.0E-64
3366	144565_at	-0.664309	2.32275	-7.12039	4.89e-08	6.11e-07	7.87541	FBgn0029828	CG6067	CG6067	CG6067	31529	4295 // trypsin activity // inferred from electronic annotation /// 4252 // serine-type endopeptidase activity // inferred from electronic annotation /// 8233 // peptidase activity // inferred from electronic annotation /// 16787 // hydrolase activity // inferred from electronic annotation	6508 // proteolysis // inferred from electronic annotation	---	---
4054	145253_at	-0.80447	1.93527	-7.11142	5.02e-08	6.25e-07	7.85032	FBgn0030859	CG12990	CG12990	CG12990	32747	16747 // transferase activity, transferring groups other than amino-acyl groups // inferred from electronic annotation	---	---	---
11315	152514_at	-0.454678	1.20893	-7.10288	5.14e-08	6.39e-07	7.82645	FBgn0038716	CG7342	CG7342	CG7342	42335	8513 // organic cation porter activity // inferred from sequence or structural similarity /// 15144 // carbohydrate transporter activity // inferred from electronic annotation /// 8513 // organic cation porter activity // inferred from sequence similarity	6812 // cation transport // inferred from electronic annotation /// 6858 // extracellular transport // inferred from electronic annotation	16021 // integral to membrane // inferred from electronic annotation	IPR005828 // General substrate transporter // 9.9E-10
150	141349_at	-0.764689	2.61072	-7.09905	5.19e-08	6.44e-07	7.81574	FBgn0036945	CG6981	CG6981	CG6981	40207	5515 // protein binding // inferred from physical interaction	---	---	---
8758	149957_at	-1.22944	0.965426	-7.09859	5.2e-08	6.44e-07	7.81444	FBgn0038337	CG6125	CG6125	CG6125	41882	5215 // transporter activity // non-traceable author statement /// 15381 // high affinity sulfate permease activity // inferred from sequence or structural similarity /// 5215 // transporter activity // inferred from electronic annotation /// 15381 // high affinity sulfate permease activity // inferred from sequence similarity	6790 // sulfur metabolism // inferred from electronic annotation /// 6820 // anion transport // inferred from electronic annotation /// 6858 // extracellular transport // inferred from electronic annotation /// 6810 // transport // inferred from electronic annotation	16021 // integral to membrane // inferred from electronic annotation	IPR001902 // Sulphate transporter // 9.1E-15 /// IPR001902 // Sulphate transporter // 1.4E-48 /// IPR001902 // Sulphate transporter // 9.1E-15 /// IPR001902 // Sulphate transporter // 1.4E-48
4859	146058_at	-0.556707	0.531236	-7.09452	5.26e-08	6.51e-07	7.80306	FBgn0032085	CG9555	CG9555	CG9555	34223	---	7275 // development // inferred from electronic annotation /// 7498 // mesoderm development // inferred from electronic annotation /// 7517 // muscle development // inferred from electronic annotation	---	---
10291	151490_s_at	-0.860218	5.07927	-7.08795	5.35e-08	6.62e-07	7.78467	FBgn0050008	CG30008	CG30008	CG30008	246388	8415 // acyltransferase activity // inferred from electronic annotation /// 16740 // transferase activity // inferred from electronic annotation	6629 // lipid metabolism // inferred from electronic annotation /// 6631 // fatty acid metabolism // inferred from electronic annotation	16021 // integral to membrane // inferred from electronic annotation	IPR002076 // GNS1/SUR4 membrane protein // 2.5E-6
245	141444_at	-1.03964	1.85719	-7.08555	5.39e-08	6.66e-07	7.77794	FBgn0030357	CG2471	CG2471	CG2471	32156	---	---	---	IPR001611 // Leucine-rich repeat // 6.9E-4 /// IPR001611 // Leucine-rich repeat // 0.094
5801	147000_at	-0.534072	-0.223318	-7.07885	5.49e-08	6.77e-07	7.75919	FBgn0033602	CG13222	CG13222	CG13222	36193	8010 // structural constituent of larval cuticle (sensu Insecta) // inferred from sequence or structural similarity /// 8010 // structural constituent of larval cuticle (sensu Insecta) // inferred from sequence similarity	---	---	IPR000618 // Insect cuticle protein // 5.1E-28
5032	146231_at	-0.472943	0.677547	-7.07721	5.52e-08	6.8e-07	7.75458	FBgn0032346 /// FBgn0068175	CG6249	Csl4 /// DyakCsl4	Csl4 /// Csl4	34548	175 // 3'-5'-exoribonuclease activity // inferred from sequence or structural similarity /// 3676 // nucleic acid binding // inferred from electronic annotation /// 3729 // mRNA binding // inferred from electronic annotation /// 5515 // protein binding // inferred from physical interaction /// 175 // 3'-5'-exoribonuclease activity // inferred from sequence similarity	6397 // mRNA processing // inferred from sequence or structural similarity /// 16072 // rRNA metabolism // inferred from electronic annotation /// 6397 // mRNA processing // inferred from sequence similarity	176 // nuclear exosome (RNase complex) // inferred from physical interaction /// 176 // nuclear exosome (RNase complex) // inferred from sequence or structural similarity /// 177 // cytoplasmic exosome (RNase complex) // inferred from sequence or structural similarity /// 5700 // polytene chromosome // non-traceable author statement /// 5634 // nucleus // inferred from electronic annotation /// 1…	---
9378	150577_at	-0.879029	2.426	-7.07602	5.53e-08	6.81e-07	7.75126	FBgn0051104	CG31104	CG31104	CG31104	43054	16301 // kinase activity // inferred from electronic annotation /// 16740 // transferase activity // inferred from electronic annotation	---	---	IPR004119 // Protein of unknown function DUF227 // 7.8E-101
10318	151517_at	-0.608415	1.50068	-7.07513	5.55e-08	6.81e-07	7.74878	FBgn0015277	CG5373	Pi3K59F	Phosphotidylinositol 3 kinase 59F	37733	16303 // phosphatidylinositol 3-kinase activity // inferred from direct assay /// 16303 // phosphatidylinositol 3-kinase activity // inferred from sequence or structural similarity /// 35004 // phosphoinositide 3-kinase activity // non-traceable author statement /// 35005 // phosphatidylinositol-4-phosphate 3-kinase activity // inferred from direct assay /// 46934 // phosphatidylinositol-4,5-bisp…	6605 // protein targeting // inferred from electronic annotation /// 6897 // endocytosis // inferred from electronic annotation /// 46854 // phosphoinositide phosphorylation // inferred from direct assay /// 46854 // phosphoinositide phosphorylation // inferred from sequence or structural similarity /// 46854 // phosphoinositide phosphorylation // non-traceable author statement /// 46854 // phosp…	35032 // phosphoinositide 3-kinase complex, class III // non-traceable author statement /// 5942 // phosphoinositide 3-kinase complex // inferred from electronic annotation	IPR000403 // Phosphatidylinositol 3- and 4-kinase // 1.0E-86 /// IPR002420 // Phosphoinositide 3-kinase, C2 domain // 2.0E-62 /// IPR001263 // Phosphoinositide 3-kinase accessory domain PIK // 1.1E-66
11704	152903_at	-0.681306	2.74793	-7.07522	5.55e-08	6.81e-07	7.74902	FBgn0038924	CG6028	CG6028	CG6028	42589	16829 // lyase activity // inferred from electronic annotation /// 16831 // carboxy-lyase activity // inferred from electronic annotation /// 16853 // isomerase activity // inferred from electronic annotation /// 3824 // catalytic activity // inferred from electronic annotation	6520 // amino acid metabolism // inferred from electronic annotation /// 9063 // amino acid catabolism // inferred from electronic annotation /// 8152 // metabolism // inferred from electronic annotation	---	IPR002529 // Fumarylacetoacetate (FAA) hydrolase // 3.2E-38 /// IPR002529 // Fumarylacetoacetate (FAA) hydrolase // 5.3E-65
12847	154046_at	-0.35036	1.56232	-7.07329	5.58e-08	6.84e-07	7.74362	FBgn0000377	CG3193	crn	crooked neck	31208	5215 // transporter activity // inferred from electronic annotation /// 5515 // protein binding // inferred from physical interaction	381 // regulation of alternative nuclear mRNA splicing, via spliceosome // inferred from mutant phenotype /// 398 // nuclear mRNA splicing, via spliceosome // inferred from sequence or structural similarity /// 6810 // transport // inferred from electronic annotation /// 7405 // neuroblast proliferation // non-traceable author statement /// 7417 // central nervous system development // non-tracea…	5634 // nucleus // Unknown /// 5634 // nucleus // non-traceable author statement /// 5681 // spliceosome complex // inferred from sequence or structural similarity /// 16607 // nuclear speck // inferred from direct assay /// 5622 // intracellular // inferred from electronic annotation /// 5634 // nucleus // inferred from electronic annotation /// 5634 // nucleus // inferred from curator /// 5681 …	IPR003107 // RNA-processing protein, HAT helix // 6.5E-7 /// IPR003107 // RNA-processing protein, HAT helix // 7.4E-20 /// IPR003107 // RNA-processing protein, HAT helix // 9.4E-5 /// IPR003107 // RNA-processing protein, HAT helix // 3.0E-5
9252	150451_at	-0.485892	1.28338	-7.07182	5.6e-08	6.85e-07	7.73948	FBgn0039085	CG10170	CG10170	CG10170	42774	3851 // 2-hydroxyacylsphingosine 1-beta-galactosyltransferase activity // inferred from sequence or structural similarity /// 16758 // transferase activity, transferring hexosyl groups // inferred from electronic annotation /// 3851 // 2-hydroxyacylsphingosine 1-beta-galactosyltransferase activity // inferred from sequence similarity	5976 // polysaccharide metabolism // inferred from electronic annotation /// 6952 // defense response // inferred from electronic annotation /// 8202 // steroid metabolism // inferred from electronic annotation /// 9636 // response to toxin // inferred from electronic annotation /// 8152 // metabolism // inferred from electronic annotation	---	IPR002213 // UDP-glucoronosyl/UDP-glucosyl transferase // 1.5E-38
13571	154770_at	-0.494077	1.94655	-7.06456	5.71e-08	6.97e-07	7.71915	FBgn0030854	CG8289	CG8289	CG8289	32741	3682 // chromatin binding // inferred from electronic annotation	6333 // chromatin assembly or disassembly // inferred from electronic annotation	785 // chromatin // inferred from electronic annotation /// 5634 // nucleus // inferred from electronic annotation	IPR000953 // Chromo // 1.4E-7
12310	153509_at	-0.843267	2.55652	-7.06021	5.78e-08	7.05e-07	7.70698	FBgn0015587	---	p120ctn	Adherens junction protein p120	---	5488 // binding // inferred from electronic annotation	7155 // cell adhesion // inferred from genetic interaction /// 7165 // signal transduction // inferred from electronic annotation	5737 // cytoplasm // inferred from direct assay /// 5813 // centrosome // inferred from direct assay /// 5912 // adherens junction // inferred from direct assay /// 5912 // adherens junction // inferred from physical interaction /// 5912 // adherens junction // inferred from sequence similarity	IPR000225 // Armadillo // 1.4E-12 /// IPR000225 // Armadillo // 1.3E-8 /// IPR000225 // Armadillo // 1.4E-7
10645	151844_at	-0.587709	2.22313	-7.0567	5.84e-08	7.11e-07	7.69712	---	CG10731 /// CG8433	---	---	---	5515 // protein binding // inferred from physical interaction /// 8375 // acetylglucosaminyltransferase activity // inferred from sequence or structural similarity /// 8375 // acetylglucosaminyltransferase activity // non-traceable author statement /// 15020 // glucuronosyltransferase activity // non-traceable author statement /// 50508 // glucuronosyl-N-acetylglucosaminyl-proteoglycan 4-alpha-N-…	6024 // glycosaminoglycan biosynthesis // inferred from mutant phenotype /// 6044 // N-acetylglucosamine metabolism // inferred from sequence or structural similarity /// 7224 // smoothened signaling pathway // inferred from mutant phenotype /// 8101 // decapentaplegic receptor signaling pathway // inferred from mutant phenotype /// 15012 // heparan sulfate proteoglycan biosynthesis // non-tracea…	5783 // endoplasmic reticulum // inferred from direct assay /// 5794 // Golgi apparatus // inferred from direct assay /// 16020 // membrane // inferred from electronic annotation /// 276 // proton-transporting ATP synthase complex, coupling factor F(o) (sensu Eukaryota) // inferred from sequence or structural similarity /// 5783 // endoplasmic reticulum // inferred from electronic annotation /// …	---
6879	148078_at	-0.499419	-0.0505509	-7.05275	5.9e-08	7.19e-07	7.68606	---	---	---	---	---	---	---	---	---
9892	151091_at	-1.24032	5.90035	-7.0488	5.97e-08	7.25e-07	7.67501	FBgn0040606	CG6503	CG6503	CG6503	50079	---	---	---	---
10485	151684_i_at	-0.701064	2.28834	-7.04533	6.03e-08	7.3e-07	7.66528	FBgn0052813	CG32813	CG32813	CG32813	31089	---	---	---	---
923	142122_at	-0.894388	0.93128	-7.04459	6.04e-08	7.31e-07	7.66321	FBgn0041707	CG1168	7B2	7B2	40644	5184 // neuropeptide hormone activity // inferred from electronic annotation /// 16484 // proprotein convertase 2 activator activity // inferred from sequence or structural similarity /// 5515 // protein binding // inferred from physical interaction /// 16484 // proprotein convertase 2 activator activity // inferred from sequence similarity	7165 // signal transduction // inferred from electronic annotation /// 7218 // neuropeptide signaling pathway // inferred from electronic annotation /// 16486 // peptide hormone processing // inferred from sequence or structural similarity /// 19226 // transmission of nerve impulse // inferred from electronic annotation /// 16486 // peptide hormone processing // inferred from sequence similarity	30141 // secretory granule // inferred from electronic annotation	IPR007945 // Neuroendocrine 7B2 precursor // 1.0E-126 /// IPR007945 // Neuroendocrine 7B2 precursor // 1.0E-126
4281	145480_at	-0.67092	0.871207	-7.03915	6.13e-08	7.39e-07	7.64795	FBgn0031182	CG1644	Cyp6t1	Cyp6t1	33127	4497 // monooxygenase activity // inferred from electronic annotation /// 16491 // oxidoreductase activity // inferred from electronic annotation /// 5506 // iron ion binding // inferred from electronic annotation /// 20037 // heme binding // inferred from electronic annotation /// 46872 // metal ion binding // inferred from electronic annotation	6118 // electron transport // inferred from electronic annotation	5792 // microsome // non-traceable author statement /// 16020 // membrane // non-traceable author statement /// 5783 // endoplasmic reticulum // inferred from electronic annotation /// 5792 // microsome // inferred from electronic annotation /// 16020 // membrane // inferred from electronic annotation	IPR001128 // Cytochrome P450 // 1.1E-66
5886	147085_at	-0.897277	0.0874899	-7.03368	6.23e-08	7.49e-07	7.63261	FBgn0050042	CG30042	CG30042	CG30042	36345	---	---	---	IPR000618 // Insect cuticle protein // 1.5E-26
6587	147786_at	-0.816988	0.443699	-7.03302	6.24e-08	7.5e-07	7.63077	FBgn0015372	CG3870	chrw	chrowded	44172	3924 // GTPase activity // inferred from sequence or structural similarity /// 3924 // GTPase activity // traceable author statement /// 5525 // GTP binding // inferred from sequence or structural similarity /// 166 // nucleotide binding // inferred from electronic annotation /// 5525 // GTP binding // inferred from electronic annotation /// 3924 // GTPase activity // inferred from sequence simil…	6886 // intracellular protein transport // inferred from electronic annotation /// 6898 // receptor mediated endocytosis // inferred from electronic annotation /// 7041 // lysosomal transport // inferred from electronic annotation /// 7165 // signal transduction // inferred from electronic annotation /// 7264 // small GTPase mediated signal transduction // inferred from electronic annotation /// …	5886 // plasma membrane // inferred from sequence or structural similarity /// 16020 // membrane // inferred from electronic annotation /// 5886 // plasma membrane // inferred from sequence similarity	IPR001806 // Ras GTPase superfamily // 7.8E-62
6138	147337_at	-0.761605	1.34243	-7.03166	6.26e-08	7.52e-07	7.62693	FBgn0046999	CG6429	CG6429	CG6429	36893	5515 // protein binding // inferred from physical interaction	6952 // defense response // inferred from electronic annotation /// 42742 // defense response to bacteria // inferred from electronic annotation	---	IPR008597 // Destabilase // 5.5E-73
13587	154786_at	-1.06609	2.72312	-7.0178	6.51e-08	7.79e-07	7.58805	FBgn0038347	CG18522	CG18522	CG18522	41894	16491 // oxidoreductase activity // inferred from electronic annotation /// 5515 // protein binding // inferred from physical interaction /// 5506 // iron ion binding // inferred from electronic annotation /// 30151 // molybdenum ion binding // inferred from electronic annotation /// 46872 // metal ion binding // inferred from electronic annotation /// 51536 // iron-sulfur cluster binding // infe…	6118 // electron transport // inferred from electronic annotation /// 6139 // nucleobase, nucleoside, nucleotide and nucleic acid metabolism // inferred from electronic annotation /// 6144 // purine base metabolism // inferred from electronic annotation /// 6800 // oxygen and reactive oxygen species metabolism // inferred from electronic annotation /// 6952 // defense response // inferred from el…	---	IPR008274 // Aldehyde oxidase and xanthine dehydrogenase, molybdopterin binding // 5.7E-48 /// IPR008274 // Aldehyde oxidase and xanthine dehydrogenase, molybdopterin binding // 1.9E-71 /// IPR002346 // Molybdopterin dehydrogenase, FAD-binding // 2.0E-8 /// IPR000674 // Aldehyde oxidase and xanthine dehydrogenase, a/b hammerhead // 5.3E-33 /// IPR002888 // [2Fe-2S]-binding // 3.6E-49 /// IPR00510…
3715	144914_at	-0.645998	0.481616	-7.01212	6.61e-08	7.9e-07	7.57212	FBgn0030367	CG1488	Cyp311a1	Cyp311a1	32170	4497 // monooxygenase activity // inferred from electronic annotation /// 16491 // oxidoreductase activity // inferred from electronic annotation /// 5506 // iron ion binding // inferred from electronic annotation /// 20037 // heme binding // inferred from electronic annotation /// 46872 // metal ion binding // inferred from electronic annotation	6118 // electron transport // inferred from electronic annotation /// 8202 // steroid metabolism // inferred from electronic annotation	5792 // microsome // non-traceable author statement /// 16020 // membrane // non-traceable author statement /// 5783 // endoplasmic reticulum // inferred from electronic annotation /// 5792 // microsome // inferred from electronic annotation /// 16020 // membrane // inferred from electronic annotation	IPR001128 // Cytochrome P450 // 1.4E-79 /// IPR001128 // Cytochrome P450 // 5.5E-91
12061	153260_at	-0.61788	2.29434	-7.00898	6.67e-08	7.96e-07	7.56332	FBgn0026061	CG4123	Mipp1	Multiple inositol polyphosphate phosphatase 1	39841	3993 // acid phosphatase activity // inferred from electronic annotation /// 4437 // inositol or phosphatidylinositol phosphatase activity // inferred from sequence or structural similarity /// 4721 // phosphoprotein phosphatase activity // non-traceable author statement /// 4437 // inositol or phosphatidylinositol phosphatase activity // inferred from sequence similarity	---	---	---
619	141818_at	-0.662622	0.337755	-7.00587	6.73e-08	8.02e-07	7.55458	FBgn0039183	CG6413	Dis3	Dis3	42900	175 // 3'-5'-exoribonuclease activity // inferred from sequence or structural similarity /// 3676 // nucleic acid binding // inferred from electronic annotation /// 3729 // mRNA binding // inferred from electronic annotation /// 3723 // RNA binding // inferred from electronic annotation /// 4540 // ribonuclease activity // inferred from electronic annotation /// 175 // 3'-5'-exoribonuclease activ…	6397 // mRNA processing // inferred from sequence or structural similarity /// 7067 // mitosis // inferred from electronic annotation /// 6397 // mRNA processing // inferred from sequence similarity	176 // nuclear exosome (RNase complex) // inferred from physical interaction /// 176 // nuclear exosome (RNase complex) // inferred from sequence or structural similarity /// 177 // cytoplasmic exosome (RNase complex) // inferred from sequence or structural similarity /// 176 // nuclear exosome (RNase complex) // inferred from sequence similarity /// 177 // cytoplasmic exosome (RNase complex) // …	IPR001900 // Ribonuclease II // 1.0E-126
5783	146982_at	-0.534798	1.02016	-7.00487	6.75e-08	8.03e-07	7.55179	FBgn0033582	CG9084	CG9084	CG9084	36172	---	---	---	IPR005552 // Scramblase // 6.7E-11
11742	152941_at	-0.466192	2.43511	-7.00501	6.74e-08	8.03e-07	7.55217	FBgn0019972	CG7788	Ice	Ice	43514	30693 // caspase activity // inferred from sequence or structural similarity /// 30693 // caspase activity // non-traceable author statement /// 30693 // caspase activity // traceable author statement /// 5515 // protein binding // inferred from physical interaction /// 8233 // peptidase activity // inferred from electronic annotation /// 8234 // cysteine-type peptidase activity // inferred from …	6508 // proteolysis // inferred from electronic annotation /// 6508 // proteolysis // traceable author statement /// 6915 // apoptosis // non-traceable author statement /// 6915 // apoptosis // traceable author statement /// 46668 // regulation of retinal programmed cell death // non-traceable author statement /// 6915 // apoptosis // inferred from electronic annotation	8303 // caspase complex // non-traceable author statement	IPR001309 // Caspase-1, p20 // 2.7E-110
8851	150050_at	-0.72271	0.890833	-7.00424	6.76e-08	8.03e-07	7.55002	FBgn0038481	CG17475	CG17475	CG17475	42069	4252 // serine-type endopeptidase activity // inferred from sequence or structural similarity /// 4252 // serine-type endopeptidase activity // non-traceable author statement /// 4263 // chymotrypsin activity // inferred from electronic annotation /// 4295 // trypsin activity // inferred from electronic annotation /// 4252 // serine-type endopeptidase activity // inferred from electronic annotati…	6508 // proteolysis // non-traceable author statement /// 6508 // proteolysis // inferred from electronic annotation	---	IPR001254 // Peptidase S1, chymotrypsin // 1.6E-60
12945	154144_at	-0.528205	1.73107	-6.99983	6.84e-08	8.12e-07	7.53764	FBgn0030142	CG3004	CG3004	CG3004	31903	3729 // mRNA binding // inferred from electronic annotation /// 3924 // GTPase activity // inferred from sequence or structural similarity /// 5515 // protein binding // inferred from physical interaction /// 3924 // GTPase activity // inferred from sequence similarity	16072 // rRNA metabolism // inferred from electronic annotation	5834 // heterotrimeric G-protein complex // inferred from sequence or structural similarity /// 5834 // heterotrimeric G-protein complex // inferred from sequence similarity	IPR001680 // G-protein beta WD-40 repeat // 0.0018 /// IPR001680 // G-protein beta WD-40 repeat // 0.1 /// IPR001680 // G-protein beta WD-40 repeat // 7.1E-6 /// IPR001680 // G-protein beta WD-40 repeat // 2.5E-4 /// IPR001680 // G-protein beta WD-40 repeat // 0.0042 /// IPR001680 // G-protein beta WD-40 repeat // 1.5E-9 /// IPR001680 // G-protein beta WD-40 repeat // 9.4E-6
1878	143077_at	-0.539482	0.757379	-6.99588	6.92e-08	8.19e-07	7.52654	FBgn0000115	CG6025	Arf72A	Arflike at 72A	39745	3924 // GTPase activity // non-traceable author statement /// 5525 // GTP binding // inferred from direct assay /// 5525 // GTP binding // inferred from sequence or structural similarity /// 5525 // GTP binding // non-traceable author statement /// 5515 // protein binding // inferred from physical interaction /// 166 // nucleotide binding // inferred from electronic annotation /// 5525 // GTP bin…	6471 // protein amino acid ADP-ribosylation // inferred from sequence or structural similarity /// 6886 // intracellular protein transport // inferred from electronic annotation /// 7166 // cell surface receptor linked signal transduction // inferred from electronic annotation /// 7264 // small GTPase mediated signal transduction // inferred from electronic annotation /// 7269 // neurotransmitter…	5622 // intracellular // inferred from electronic annotation	IPR006689 // ARF/SAR superfamily // 1.0E-123
11253	152452_at	-1.05211	3.04893	-6.99543	6.93e-08	8.2e-07	7.52527	FBgn0020415	CG4475	Idgf2	Imaginal disc growth factor 2	34979	4568 // chitinase activity // inferred from sequence or structural similarity /// 8084 // imaginal disc growth factor activity // inferred from direct assay /// 16799 // hydrolase activity, hydrolyzing N-glycosyl compounds // inferred from electronic annotation /// 45735 // nutrient reservoir activity // inferred from electronic annotation /// 5515 // protein binding // inferred from physical int…	7165 // signal transduction // inferred from electronic annotation /// 7267 // cell-cell signaling // inferred from electronic annotation /// 7444 // imaginal disc development // inferred from direct assay /// 8152 // metabolism // inferred from electronic annotation /// 5975 // carbohydrate metabolism // inferred from electronic annotation /// 6032 // chitin catabolism // inferred from electroni…	5576 // extracellular region // inferred from direct assay /// 5576 // extracellular region // non-traceable author statement	IPR001223 // Glycoside hydrolase, family 18 // 7.8E-100
10769	151968_at	-0.428155	0.689053	-6.98653	7.1e-08	8.39e-07	7.5003	FBgn0033376	CG8777	CG8777	CG8777	35921	5488 // binding // inferred from electronic annotation	---	---	IPR001440 // TPR repeat // 6.5E-5 /// IPR001440 // TPR repeat // 0.037 /// IPR001440 // TPR repeat // 0.0052 /// IPR001440 // TPR repeat // 1.4E-5 /// IPR001440 // TPR repeat // 0.093 /// IPR001440 // TPR repeat // 0.0043 /// IPR001440 // TPR repeat // 0.0076 /// IPR001440 // TPR repeat // 0.055
11126	152325_at	-1.28953	2.1595	-6.98374	7.16e-08	8.45e-07	7.49244	FBgn0039114	CG10374	Lsd-1	Lipid storage droplet-1	42810	5515 // protein binding // inferred from physical interaction /// 5319 // lipid transporter activity // inferred from expression pattern	19915 // sequestering of lipid // non-traceable author statement /// 6869 // lipid transport // inferred from expression pattern /// 19915 // sequestering of lipid // inferred from expression pattern /// 6810 // transport // inferred from electronic annotation /// 6869 // lipid transport // inferred from electronic annotation	5811 // lipid particle // inferred from direct assay	IPR004279 // Perilipin // 1.0E-126 /// IPR004279 // Perilipin // 1.3E-16 /// IPR004279 // Perilipin // 1.0E-126 /// IPR004279 // Perilipin // 1.3E-16 /// IPR004279 // Perilipin // 3.9E-109 /// IPR004279 // Perilipin // 1.3E-16
33	141232_at	-0.509358	3.25398	-6.98309	7.17e-08	8.45e-07	7.49061	FBgn0038326	CG5044	CG5044	CG5044	41869	3860 // 3-hydroxyisobutyryl-CoA hydrolase activity // inferred from sequence or structural similarity /// 16491 // oxidoreductase activity // inferred from electronic annotation /// 16836 // hydro-lyase activity // inferred from electronic annotation /// 3824 // catalytic activity // inferred from electronic annotation /// 3860 // 3-hydroxyisobutyryl-CoA hydrolase activity // inferred from sequen…	6635 // fatty acid beta-oxidation // inferred from electronic annotation /// 8152 // metabolism // inferred from electronic annotation	---	IPR001753 // Enoyl-CoA hydratase/isomerase // 4.0E-22 /// IPR001753 // Enoyl-CoA hydratase/isomerase // 4.0E-22
13710	154909_at	-0.637692	5.76936	-6.98219	7.19e-08	8.47e-07	7.48809	FBgn0005278	CG2674	M(2)21AB	Minute (2) 21AB	48552	4478 // methionine adenosyltransferase activity // inferred from sequence or structural similarity /// 4478 // methionine adenosyltransferase activity // non-traceable author statement /// 5524 // ATP binding // inferred from electronic annotation /// 16779 // nucleotidyltransferase activity // inferred from electronic annotation /// 5515 // protein binding // inferred from physical interaction /…	6556 // S-adenosylmethionine biosynthesis // inferred from mutant phenotype /// 6556 // S-adenosylmethionine biosynthesis // non-traceable author statement /// 6730 // one-carbon compound metabolism // non-traceable author statement /// 6730 // one-carbon compound metabolism // inferred from electronic annotation	---	IPR002133 // S-adenosylmethionine synthetase // 2.5E-66 /// IPR002133 // S-adenosylmethionine synthetase // 3.4E-98 /// IPR002133 // S-adenosylmethionine synthetase // 4.6E-94 /// IPR002133 // S-adenosylmethionine synthetase // 5.3E-65 /// IPR002133 // S-adenosylmethionine synthetase // 1.1E-93 /// IPR002133 // S-adenosylmethionine synthetase // 3.4E-98 /// IPR002133 // S-adenosylmethionine synth…
10688	151887_at	-1.10375	2.03776	-6.98153	7.2e-08	8.48e-07	7.48624	FBgn0042627	CG3524	v(2)k05816	v(2)k05816	117361	4024 // alcohol dehydrogenase activity, zinc-dependent // inferred from electronic annotation /// 4313 // [acyl-carrier protein] S-acetyltransferase activity // inferred from sequence or structural similarity /// 4314 // [acyl-carrier protein] S-malonyltransferase activity // inferred from sequence or structural similarity /// 4315 // 3-oxoacyl-[acyl-carrier protein] synthase activity // inferred…	6633 // fatty acid biosynthesis // inferred from electronic annotation /// 8152 // metabolism // inferred from electronic annotation /// 9058 // biosynthesis // inferred from electronic annotation	---	IPR002085 // Zinc-containing alcohol dehydrogenase superfamily // 2.4E-50 /// IPR000794 // Beta-ketoacyl synthase // 7.2E-62 /// IPR001227 // Acyl transferase domain // 4.0E-73 /// IPR001031 // Thioesterase // 1.2E-15 /// IPR000794 // Beta-ketoacyl synthase // 1.2E-73
[truncated: 1,902 more rows]
