# Supplementary material for: Gene expression changes in response to aging compared to heat stress, oxidative stress and ionizing radiation in Drosophila melanogaster
Source: Aging (Albany NY). 2012 Nov 30;4(11):768–89. doi: 10.18632/aging.100499 (PMC3560439; doi:10.18632/aging.100499)
Supplement: Supplementary file 15 [file aging-04-768-s015.xlsx]

## Sheet: TableS4k.IRup
Table S4k. IR up
ID	M	A	t	P.Value	adj.P.Val	B	FlyBase	Ensembl	Gene.Symbol	Gene.Title	Entrez.Gene	Gene.Ontology.Molecular.Function	Gene.Ontology.Biological.Process	Gene.Ontology.Cellular.Component	InterPro
7463	148662_at	3.48058	1.99986	41.1107	6.57839e-29	9.21633e-25	55.2885	FBgn0036290	CG10638	CG10638	CG10638	39424	4032 // aldehyde reductase activity // inferred from sequence or structural similarity /// 16491 // oxidoreductase activity // inferred from electronic annotation /// 4032 // aldehyde reductase activity // inferred from sequence similarity	6081 // aldehyde metabolism // inferred from sequence or structural similarity /// 6081 // aldehyde metabolism // inferred from sequence similarity	---	IPR001395 // Aldo/keto reductase // 1.0E-126
12380	153579_at	2.70814	0.884565	38.87	3.7093e-28	2.59837e-24	53.7123	FBgn0011703	CG5371	RnrL	Ribonucleoside diphosphate reductase large subunit	34392	4748 // ribonucleoside-diphosphate reductase activity // inferred from sequence or structural similarity /// 4748 // ribonucleoside-diphosphate reductase activity // non-traceable author statement /// 166 // nucleotide binding // inferred from electronic annotation /// 3824 // catalytic activity // inferred from electronic annotation /// 4748 // ribonucleoside-diphosphate reductase activity // in…	6144 // purine base metabolism // inferred from electronic annotation /// 6206 // pyrimidine base metabolism // inferred from electronic annotation /// 6260 // DNA replication // non-traceable author statement /// 6260 // DNA replication // inferred from electronic annotation	5971 // ribonucleoside-diphosphate reductase complex // inferred from sequence or structural similarity /// 5971 // ribonucleoside-diphosphate reductase complex // inferred from electronic annotation /// 5971 // ribonucleoside-diphosphate reductase complex // inferred from sequence similarity	IPR000788 // Ribonucleotide reductase large subunit // 1.0E-126 /// IPR005144 // ATP cone domain // 5.1E-26 /// IPR000788 // Ribonucleotide reductase large subunit // 8.8E-34
12916	154115_at	2.62778	2.59596	37.551	1.07442e-27	5.01755e-24	52.7335	FBgn0032393	CG12264	CG12264	CG12264	34613	4123 // cystathionine gamma-lyase activity // inferred from sequence or structural similarity /// 4123 // cystathionine gamma-lyase activity // non-traceable author statement /// 8483 // transaminase activity // inferred from electronic annotation /// 16740 // transferase activity // inferred from electronic annotation /// 31071 // cysteine desulfurase activity // inferred from electronic annotat…	6523 // alanine biosynthesis // inferred from sequence or structural similarity /// 16226 // iron-sulfur cluster assembly // inferred from sequence or structural similarity /// 16226 // iron-sulfur cluster assembly // non-traceable author statement /// 19740 // nitrogen utilization // inferred from electronic annotation /// 8152 // metabolism // inferred from electronic annotation /// 6523 // ala…	5737 // cytoplasm // inferred from sequence or structural similarity /// 5739 // mitochondrion // inferred from sequence or structural similarity /// 5739 // mitochondrion // non-traceable author statement /// 5739 // mitochondrion // inferred from electronic annotation /// 5737 // cytoplasm // inferred from sequence similarity /// 5739 // mitochondrion // inferred from sequence similarity	IPR000192 // Aminotransferase, class V // 1.0E-126
11923	153122_at	3.95917	3.47582	36.9329	1.79071e-27	6.27195e-24	52.2609	FBgn0000052	CG9127	ade2	adenosine 2	33847	4642 // phosphoribosylformylglycinamidine synthase activity // inferred from sequence or structural similarity /// 4642 // phosphoribosylformylglycinamidine synthase activity // non-traceable author statement /// 3824 // catalytic activity // inferred from electronic annotation /// 4642 // phosphoribosylformylglycinamidine synthase activity // inferred from electronic annotation /// 4642 // phosp…	6144 // purine base metabolism // inferred from electronic annotation /// 6189 // 'de novo' IMP biosynthesis // inferred from sequence or structural similarity /// 6189 // 'de novo' IMP biosynthesis // non-traceable author statement /// 6189 // 'de novo' IMP biosynthesis // inferred from electronic annotation /// 6189 // 'de novo' IMP biosynthesis // inferred from sequence similarity	---	IPR010918 // AIR synthase related protein, C-terminal // 2.2E-29 /// IPR010918 // AIR synthase related protein, C-terminal // 3.0E-14 /// IPR000728 // AIR synthase related protein // 1.3E-41
1637	142836_at	5.81911	3.51267	35.8034	4.65245e-27	9.31154e-24	51.3735	FBgn0068141	CG4460 /// CG4456	DyakHsp67Bb	Hsp67Bb	---	---	8340 // determination of adult life span // inferred from mutant phenotype /// 9408 // response to heat // inferred from sequence or structural similarity /// 9408 // response to heat // non-traceable author statement /// 42026 // protein refolding // non-traceable author statement /// 6457 // protein folding // inferred from electronic annotation /// 6986 // response to unfolded protein // infer…	---	---
8673	149872_at	2.41165	0.306326	35.1424	8.2454e-27	1.44398e-23	50.8391	FBgn0038199	CG14358	CG14358	CG14358	41711	---	---	---	---
7468	148667_at	2.02524	1.20046	34.6716	1.24718e-26	1.94144e-23	50.4516	FBgn0036297	CG14121	CG14121	CG14121	39432	---	---	---	---
322	141521_at	2.88349	2.2694	33.6794	3.03675e-26	4.25448e-23	49.6151	FBgn0051864 /// FBgn0032391	CG5202 /// CG31864	CG31864 /// escl	CG31864 /// escl	318990 /// 34611	5515 // protein binding // non-traceable author statement /// 30528 // transcription regulator activity // inferred from electronic annotation	6139 // nucleobase, nucleoside, nucleotide and nucleic acid metabolism // inferred from electronic annotation /// 6357 // regulation of transcription from RNA polymerase II promoter // inferred from electronic annotation /// 6366 // transcription from RNA polymerase II promoter // inferred from electronic annotation /// 7165 // signal transduction // inferred from electronic annotation /// 7166 /…	5700 // polytene chromosome // non-traceable author statement	IPR001680 // G-protein beta WD-40 repeat // 0.18 /// IPR001680 // G-protein beta WD-40 repeat // 1.1 /// IPR001680 // G-protein beta WD-40 repeat // 2.9E-10 /// IPR001680 // G-protein beta WD-40 repeat // 4.2E-5 /// IPR001680 // G-protein beta WD-40 repeat // 0.39 /// IPR001680 // G-protein beta WD-40 repeat // 0.0021
12562	153761_at	3.03595	3.03911	29.9983	1.03988e-24	1.21406e-21	46.2557	FBgn0039241	CG11089	CG11089	CG11089	42973	3937 // IMP cyclohydrolase activity // inferred from sequence or structural similarity /// 4643 // phosphoribosylaminoimidazolecarboxamide formyltransferase activity // inferred from sequence or structural similarity /// 3937 // IMP cyclohydrolase activity // inferred from electronic annotation /// 4643 // phosphoribosylaminoimidazolecarboxamide formyltransferase activity // inferred from electro…	6144 // purine base metabolism // inferred from electronic annotation /// 6164 // purine nucleotide biosynthesis // inferred from electronic annotation	---	IPR002695 // AICARFT/IMPCHase bienzyme // 1.0E-126 /// IPR004362 // Methylglyoxal synthase-like domain // 3.3E-49
8425	149624_at	2.05112	0.360592	28.9557	3.04615e-24	3.28281e-21	45.223	FBgn0037801	CG3999	CG3999	CG3999	41253	4375 // glycine dehydrogenase (decarboxylating) activity // inferred from sequence or structural similarity /// 5515 // protein binding // inferred from physical interaction /// 4375 // glycine dehydrogenase (decarboxylating) activity // inferred from electronic annotation /// 16829 // lyase activity // inferred from electronic annotation /// 4375 // glycine dehydrogenase (decarboxylating) activi…	6544 // glycine metabolism // inferred from electronic annotation /// 9063 // amino acid catabolism // inferred from electronic annotation /// 6520 // amino acid metabolism // inferred from electronic annotation	5961 // glycine dehydrogenase complex (decarboxylating) // inferred from sequence or structural similarity /// 5961 // glycine dehydrogenase complex (decarboxylating) // inferred from electronic annotation /// 5961 // glycine dehydrogenase complex (decarboxylating) // inferred from sequence similarity	IPR003437 // Glycine cleavage system P-protein // 1.0E-126
1863	143062_at	3.27123	2.01652	28.5317	4.7654e-24	4.7688e-21	44.7917	FBgn0000053	CG31628	ade3	adenosine 3	33986	4637 // phosphoribosylamine-glycine ligase activity // inferred from sequence or structural similarity /// 4637 // phosphoribosylamine-glycine ligase activity // non-traceable author statement /// 4641 // phosphoribosylformylglycinamidine cyclo-ligase activity // inferred from sequence or structural similarity /// 4641 // phosphoribosylformylglycinamidine cyclo-ligase activity // non-traceable au…	6144 // purine base metabolism // inferred from electronic annotation /// 6189 // 'de novo' IMP biosynthesis // inferred from sequence or structural similarity /// 6189 // 'de novo' IMP biosynthesis // non-traceable author statement /// 9113 // purine base biosynthesis // inferred from electronic annotation /// 6189 // 'de novo' IMP biosynthesis // inferred from sequence similarity	5737 // cytoplasm // inferred from electronic annotation	IPR000115 // Phosphoribosylglycinamide synthetase // 7.3E-66 /// IPR010918 // AIR synthase related protein, C-terminal // 1.8E-24 /// IPR010918 // AIR synthase related protein, C-terminal // 1.8E-44 /// IPR002376 // Formyl transferase, N-terminal // 1.6E-101 /// IPR000115 // Phosphoribosylglycinamide synthetase // 2.9E-99 /// IPR000115 // Phosphoribosylglycinamide synthetase // 2.5E-50 /// IPR000…
9195	150394_at	2.35312	1.58628	27.7345	1.12411e-23	1.04992e-20	43.9624	FBgn0039008	CG6972	CG6972	CG6972	42684	---	---	---	---
11702	152901_at	3.33592	3.6743	27.2633	1.88709e-23	1.65239e-20	43.4604	FBgn0032699	CG10383	CG10383	CG10383	35123	5488 // binding // inferred from electronic annotation	---	---	---
10631	151830_at	2.97663	3.46679	27.0447	2.40647e-23	1.98322e-20	43.2245	FBgn0011296	CG4533	l(2)efl	lethal (2) essential for life	37744	42802 // identical protein binding // inferred from physical interaction	6457 // protein folding // inferred from electronic annotation /// 6950 // response to stress // inferred from electronic annotation /// 6952 // defense response // inferred from electronic annotation /// 9408 // response to heat // non-traceable author statement /// 9790 // embryonic development // non-traceable author statement /// 6986 // response to unfolded protein // inferred from electroni…	---	IPR002068 // Heat shock protein Hsp20 // 1.0E-18 /// IPR002068 // Heat shock protein Hsp20 // 1.2E-35 /// IPR002068 // Heat shock protein Hsp20 // 6.7E-19
9483	150682_at	3.75459	4.01201	26.5485	4.20757e-23	3.10253e-20	42.6816	---	CG14245 /// CG14246	---	---	---	---	---	---	---
2080	143279_at	1.62699	1.52857	26.0724	7.25725e-23	5.0837e-20	42.1509	FBgn0011774	CG5247	Irbp	Inverted repeat-binding protein	117419	3677 // DNA binding // inferred from direct assay /// 3677 // DNA binding // inferred from sequence or structural similarity /// 3677 // DNA binding // non-traceable author statement /// 4003 // ATP-dependent DNA helicase activity // non-traceable author statement /// 4677 // DNA-dependent protein kinase activity // inferred from direct assay /// 4677 // DNA-dependent protein kinase activity // i…	723 // telomere maintenance // inferred from mutant phenotype /// 6260 // DNA replication // inferred from electronic annotation /// 6303 // double-strand break repair via nonhomologous end joining // inferred from electronic annotation /// 6310 // DNA recombination // inferred from electronic annotation	5634 // nucleus // non-traceable author statement /// 5634 // nucleus // inferred from electronic annotation /// 5958 // DNA-dependent protein kinase complex // inferred from electronic annotation	IPR006164 // Ku // 3.4E-75 /// IPR005161 // Ku70/Ku80 N-terminal alpha/beta domain // 3.9E-72 /// IPR005160 // Ku70/Ku80 C-terminal arm // 4.8E-24
12985	154184_at	2.71174	4.01528	25.8462	9.43255e-23	6.29286e-20	41.8954	FBgn0023129	CG3705	aay	astray	39085	4647 // phosphoserine phosphatase activity // inferred from sequence or structural similarity /// 4647 // phosphoserine phosphatase activity // non-traceable author statement /// 287 // magnesium ion binding // inferred from electronic annotation /// 3824 // catalytic activity // inferred from electronic annotation /// 4647 // phosphoserine phosphatase activity // inferred from electronic annotat…	6563 // L-serine metabolism // inferred from sequence or structural similarity /// 6564 // L-serine biosynthesis // non-traceable author statement /// 7411 // axon guidance // inferred from mutant phenotype /// 7422 // peripheral nervous system development // traceable author statement /// 6564 // L-serine biosynthesis // inferred from electronic annotation /// 8152 // metabolism // inferred from…	---	IPR005834 // Haloacid dehalogenase-like hydrolase // 5.7E-9
883	142082_at	2.29704	0.683526	25.1194	2.22209e-22	1.41507e-19	41.0585	---	---	---	---	---	---	---	---	---
12724	153923_at	1.79461	1.37444	23.7239	1.22886e-21	6.62169e-19	39.3817	FBgn0026737	CG6171	CG6171	CG6171	41872	---	---	---	---
5621	146820_at	1.24402	0.222909	23.6203	1.40016e-21	7.26528e-19	39.2534	FBgn0033308	CG8736	CG8736	CG8736	35841	---	---	---	---
10896	152095_at	1.77756	0.853354	23.4788	1.67484e-21	8.38019e-19	39.0772	FBgn0030246	CG1582	CG1582	CG1582	32021	3676 // nucleic acid binding // inferred from electronic annotation /// 3678 // DNA helicase activity // inferred from electronic annotation /// 3724 // RNA helicase activity // inferred from electronic annotation /// 4386 // helicase activity // inferred from sequence or structural similarity /// 5524 // ATP binding // inferred from electronic annotation /// 8026 // ATP-dependent helicase activi…	---	---	IPR007502 // Helicase-associated region // 5.3E-43 /// IPR001650 // Helicase, C-terminal // 2.2E-14 /// IPR000571 // Zn-finger, C-x8-C-x5-C-x3-H type // 9.8E-9
5064	146263_at	1.08999	0.91444	22.9404	3.34123e-21	1.61416e-18	38.3972	FBgn0032390	CG16969	CG16969	CG16969	34610	5515 // protein binding // inferred from physical interaction	---	---	---
12229	153428_at	1.89684	4.73518	22.7141	4.48543e-21	2.09469e-18	38.1068	FBgn0020513	CG3989	ade5	ade5	32228	4638 // phosphoribosylaminoimidazole carboxylase activity // inferred from sequence or structural similarity /// 4639 // phosphoribosylaminoimidazolesuccinocarboxamide synthase activity // inferred from sequence or structural similarity /// 42802 // identical protein binding // inferred from physical interaction /// 3824 // catalytic activity // inferred from electronic annotation /// 4638 // pho…	6144 // purine base metabolism // inferred from electronic annotation /// 6164 // purine nucleotide biosynthesis // inferred from electronic annotation /// 6189 // 'de novo' IMP biosynthesis // inferred from electronic annotation /// 9113 // purine base biosynthesis // inferred from genetic interaction	9320 // phosphoribosylaminoimidazole carboxylase complex // inferred from electronic annotation	IPR001636 // SAICAR synthetase // 2.4E-96 /// IPR000031 // 1-(5-Phosphoribosyl)-5-amino-4-imidazole-carboxylate (AIR) carboxylase // 2.8E-50
1346	142545_at	2.12946	2.32481	22.6051	5.17432e-21	2.26538e-18	37.9658	FBgn0010173	CG9633	RpA-70	Replication Protein A 70	40972	3697 // single-stranded DNA binding // inferred from direct assay /// 3697 // single-stranded DNA binding // non-traceable author statement /// 3676 // nucleic acid binding // inferred from electronic annotation /// 3677 // DNA binding // inferred from electronic annotation /// 8270 // zinc ion binding // inferred from electronic annotation /// 46872 // metal ion binding // inferred from electron…	6261 // DNA-dependent DNA replication // inferred from direct assay /// 6261 // DNA-dependent DNA replication // non-traceable author statement /// 6260 // DNA replication // inferred from electronic annotation	5634 // nucleus // inferred from direct assay /// 5634 // nucleus // non-traceable author statement /// 5662 // DNA replication factor A complex // inferred from direct assay /// 5662 // DNA replication factor A complex // non-traceable author statement /// 5634 // nucleus // inferred from electronic annotation	IPR004365 // OB-fold nucleic acid binding domain // 4.5E-17 /// IPR007199 // Replication factor-A protein 1, N-terminal // 3.6E-53
11533	152732_at	1.79801	2.59607	22.305	7.69098e-21	3.26517e-18	37.5746	FBgn0036997	CG5955	CG5955	CG5955	40268	3978 // UDP-glucose 4-epimerase activity // inferred from sequence or structural similarity /// 3824 // catalytic activity // inferred from electronic annotation /// 51287 // NAD binding // inferred from electronic annotation /// 3978 // UDP-glucose 4-epimerase activity // inferred from sequence similarity	9225 // nucleotide-sugar metabolism // inferred from electronic annotation	---	---
10568	151767_at	3.2341	2.69898	22.1166	9.88804e-21	3.96328e-18	37.3263	FBgn0010222	CG18466	Nmdmc	NAD-dependent methylenetetrahydrofolate dehydrogenase	47895	287 // magnesium ion binding // non-traceable author statement /// 4477 // methenyltetrahydrofolate cyclohydrolase activity // inferred from sequence or structural similarity /// 4477 // methenyltetrahydrofolate cyclohydrolase activity // non-traceable author statement /// 4487 // methylenetetrahydrofolate dehydrogenase (NAD+) activity // non-traceable author statement /// 4488 // methylenetetrah…	5975 // carbohydrate metabolism // inferred from sequence or structural similarity /// 8652 // amino acid biosynthesis // inferred from electronic annotation /// 9256 // 10-formyltetrahydrofolate metabolism // inferred from sequence or structural similarity /// 9396 // folic acid and derivative biosynthesis // inferred from electronic annotation /// 46653 // tetrahydrofolate metabolism // inferre…	5739 // mitochondrion // inferred from sequence or structural similarity /// 5739 // mitochondrion // non-traceable author statement /// 5739 // mitochondrion // inferred from electronic annotation /// 5739 // mitochondrion // inferred from sequence similarity	IPR000672 // Tetrahydrofolate dehydrogenase/cyclohydrolase // 5.3E-79 /// IPR000672 // Tetrahydrofolate dehydrogenase/cyclohydrolase // 3.5E-112 /// IPR000672 // Tetrahydrofolate dehydrogenase/cyclohydrolase // 5.3E-79 /// IPR000672 // Tetrahydrofolate dehydrogenase/cyclohydrolase // 3.5E-112
408	141607_at	1.46881	1.05623	21.853	1.40986e-20	5.33841e-18	36.9756	FBgn0024988	CG14801	CG14801	CG14801	31136	3676 // nucleic acid binding // inferred from electronic annotation /// 4527 // exonuclease activity // inferred from sequence or structural similarity /// 4532 // exoribonuclease activity // inferred from electronic annotation /// 4518 // nuclease activity // inferred from electronic annotation /// 4527 // exonuclease activity // inferred from electronic annotation /// 16787 // hydrolase activit…	6139 // nucleobase, nucleoside, nucleotide and nucleic acid metabolism // inferred from electronic annotation	5622 // intracellular // inferred from electronic annotation /// 5634 // nucleus // inferred from electronic annotation	IPR006055 // Exonuclease // 1.3E-36 /// IPR006055 // Exonuclease // 1.3E-36 /// IPR006055 // Exonuclease // 1.3E-36
13952	155151_at	1.2074	1.70935	21.6605	1.83131e-20	6.57862e-18	36.7168	FBgn0034312	CG10916	CG10916	CG10916	37081	5515 // protein binding // inferred from electronic annotation /// 8270 // zinc ion binding // inferred from electronic annotation /// 46872 // metal ion binding // inferred from electronic annotation	6512 // ubiquitin cycle // inferred from electronic annotation	5634 // nucleus // inferred from electronic annotation	IPR001841 // Zn-finger, RING // 9.1E-14
5509	146708_at	2.44126	3.52523	21.3844	2.67403e-20	9.36578e-18	36.342	FBgn0029507	CG12846	Tsp42Ed	Tetraspanin 42Ed	35613	---	---	16021 // integral to membrane // inferred from sequence or structural similarity /// 16021 // integral to membrane // inferred from electronic annotation /// 16021 // integral to membrane // inferred from sequence similarity	IPR000301 // CD9/CD37/CD63 antigen // 1.4E-59
7351	148550_at	1.68191	2.29923	21.1821	3.53852e-20	1.20914e-17	36.0644	FBgn0036126	CG6272	CG6272	CG6272	39243	3677 // DNA binding // inferred from electronic annotation /// 46982 // protein heterodimerization activity // inferred from sequence or structural similarity /// 43565 // sequence-specific DNA binding // inferred from electronic annotation /// 46983 // protein dimerization activity // inferred from electronic annotation /// 46982 // protein heterodimerization activity // inferred from sequence s…	6355 // regulation of transcription, DNA-dependent // inferred from electronic annotation	5634 // nucleus // inferred from electronic annotation	---
11617	152816_at	2.62285	5.40542	20.9394	4.96677e-20	1.65677e-17	35.7282	FBgn0029990	CG2233	CG2233	CG2233	31721	---	---	---	---
9119	150318_at	1.9145	1.0496	20.6014	8.0113e-20	2.61019e-17	35.2537	FBgn0038893	CG6353	CG6353	CG6353	42551	---	---	---	IPR002804 // Protein of unknown function DUF101 // 3.2E-81
245	141444_at	2.77684	1.85719	20.4415	1.00687e-19	3.07783e-17	35.0267	FBgn0030357	CG2471	CG2471	CG2471	32156	---	---	---	IPR001611 // Leucine-rich repeat // 6.9E-4 /// IPR001611 // Leucine-rich repeat // 0.094
9153	150352_at	1.02298	0.112231	20.4463	1e-19	3.07783e-17	35.0335	FBgn0038943	CG5391	CG5391	CG5391	42611	---	---	---	---
12618	153817_at	1.41804	3.81957	20.4202	1.03816e-19	3.0946e-17	34.9963	FBgn0003514	CG3595	sqh	spaghetti squash	31554	5509 // calcium ion binding // non-traceable author statement /// 5516 // calmodulin binding // inferred from electronic annotation /// 42623 // ATPase activity, coupled // inferred from sequence or structural similarity /// 5509 // calcium ion binding // inferred from electronic annotation /// 42623 // ATPase activity, coupled // inferred from sequence similarity	910 // cytokinesis // inferred from mutant phenotype /// 910 // cytokinesis // non-traceable author statement /// 910 // cytokinesis // traceable author statement /// 1736 // establishment of planar polarity // non-traceable author statement /// 6936 // muscle contraction // inferred from electronic annotation /// 7298 // border follicle cell migration (sensu Insecta) // inferred from mutant phen…	16461 // unconventional myosin // inferred from sequence or structural similarity /// 16461 // unconventional myosin // non-traceable author statement /// 16461 // unconventional myosin // inferred from sequence similarity	IPR002048 // Calcium-binding EF-hand // 1.1E-7
3591	144790_at	1.46805	0.576906	19.8535	2.36486e-19	6.90244e-17	34.1776	FBgn0030189	CG2909	CG2909	CG2909	31958	5515 // protein binding // inferred from physical interaction	---	---	---
2830	144029_at	1.34171	1.0064	19.6938	2.99345e-19	8.38765e-17	33.943	FBgn0024912	CG1303	agt	O-6-alkylguanine-DNA alkyltransferase	40816	3676 // nucleic acid binding // inferred from electronic annotation /// 3908 // methylated-DNA-[protein]-cysteine S-methyltransferase activity // inferred from direct assay /// 3908 // methylated-DNA-[protein]-cysteine S-methyltransferase activity // inferred from sequence or structural similarity /// 3908 // methylated-DNA-[protein]-cysteine S-methyltransferase activity // non-traceable author s…	6259 // DNA metabolism // inferred from electronic annotation /// 6281 // DNA repair // inferred from electronic annotation /// 6307 // DNA dealkylation // inferred from direct assay	---	IPR001497 // Methylated-DNA-[protein]-cysteine S-methyltransferase // 2.2E-31
5294	146493_at	1.34473	0.681811	19.6992	2.9697e-19	8.38765e-17	33.951	FBgn0032781	CG9987	CG9987	CG9987	35220	5515 // protein binding // inferred from physical interaction	---	---	IPR001233 // Protein of unknown function UPF0027 // 1.0E-126
10426	151625_at	0.989267	1.83232	19.3623	4.90823e-19	1.32239e-16	33.4505	FBgn0028372	CG11025	isopeptidase-T-3	isopeptidase-T-3	37261	4221 // ubiquitin thiolesterase activity // non-traceable author statement /// 5515 // protein binding // inferred from physical interaction	---	---	IPR000449 // Ubiquitin-associated domain // 1.3E-7 /// IPR000449 // Ubiquitin-associated domain // 3.5E-11 /// IPR000449 // Ubiquitin-associated domain // 1.3E-7 /// IPR000449 // Ubiquitin-associated domain // 3.5E-11
616	141815_at	1.28235	3.74945	19.2781	5.57111e-19	1.47267e-16	33.3242	FBgn0035438	CG12013	PHGPx	PHGPx	38413	4601 // peroxidase activity // inferred from direct assay /// 4602 // glutathione peroxidase activity // inferred from sequence or structural similarity /// 5515 // protein binding // inferred from physical interaction /// 4601 // peroxidase activity // inferred from electronic annotation /// 4602 // glutathione peroxidase activity // inferred from electronic annotation /// 16491 // oxidoreductas…	6952 // defense response // inferred from electronic annotation /// 6982 // response to lipid hydroperoxide // inferred from sequence or structural similarity /// 8202 // steroid metabolism // inferred from electronic annotation /// 9636 // response to toxin // inferred from electronic annotation /// 6979 // response to oxidative stress // inferred from electronic annotation /// 6982 // response …	5737 // cytoplasm // inferred from sequence or structural similarity /// 5739 // mitochondrion // inferred from sequence or structural similarity /// 5737 // cytoplasm // inferred from sequence similarity /// 5739 // mitochondrion // inferred from sequence similarity	IPR000889 // Glutathione peroxidase // 6.4E-48 /// IPR000889 // Glutathione peroxidase // 6.4E-48 /// IPR000889 // Glutathione peroxidase // 6.4E-48
10103	151302_at	1.56733	1.15711	19.2018	6.25205e-19	1.62206e-16	33.2093	FBgn0040828	CG13306	CG13306	CG13306	50301	---	---	---	---
7974	149173_at	1.60346	1.70355	19.1373	6.89308e-19	1.7245e-16	33.1119	FBgn0037071	CG7632	CG7632	CG7632	40357	5509 // calcium ion binding // inferred from electronic annotation /// 5544 // calcium-dependent phospholipid binding // inferred from electronic annotation /// 16787 // hydrolase activity // inferred from electronic annotation /// 3824 // catalytic activity // inferred from electronic annotation	---	---	---
10529	151728_at	1.31197	2.0291	19.0574	7.78397e-19	1.89884e-16	32.9907	FBgn0038953	CG18596	CG18596	CG18596	42622	3723 // RNA binding // inferred from electronic annotation /// 8173 // RNA methyltransferase activity // inferred from electronic annotation	6396 // RNA processing // inferred from electronic annotation	---	IPR001537 // tRNA/rRNA methyltransferase (SpoU) // 6.7E-5
10826	152025_at	1.25151	2.22982	19.0509	7.86099e-19	1.89884e-16	32.9809	FBgn0030159	CG9689	CG9689	CG9689	31922	---	---	---	---
13794	154993_at	1.64719	1.80898	19.0051	8.42976e-19	1.93608e-16	32.9112	FBgn0037447	CG2330	CG2330	CG2330	40796	5198 // structural molecule activity // inferred from electronic annotation /// 5201 // extracellular matrix structural constituent // inferred from electronic annotation	1501 // skeletal development // inferred from electronic annotation /// 7275 // development // inferred from electronic annotation /// 7398 // ectoderm development // inferred from electronic annotation /// 7399 // nervous system development // inferred from electronic annotation /// 7498 // mesoderm development // inferred from electronic annotation	---	IPR008709 // Neurochondrin // 1.0E-126
11522	152721_at	1.49064	2.66617	18.841	1.08393e-18	2.44933e-16	32.6604	FBgn0020416	CG4472	Idgf1	Imaginal disc growth factor 1	34978	4568 // chitinase activity // inferred from sequence or structural similarity /// 8084 // imaginal disc growth factor activity // inferred from direct assay /// 16799 // hydrolase activity, hydrolyzing N-glycosyl compounds // inferred from electronic annotation /// 4553 // hydrolase activity, hydrolyzing O-glycosyl compounds // inferred from electronic annotation /// 4568 // chitinase activity //…	7165 // signal transduction // inferred from electronic annotation /// 7267 // cell-cell signaling // inferred from electronic annotation /// 7444 // imaginal disc development // inferred from direct assay /// 8152 // metabolism // inferred from electronic annotation /// 5975 // carbohydrate metabolism // inferred from electronic annotation /// 6032 // chitin catabolism // inferred from electroni…	5576 // extracellular region // inferred from direct assay /// 5576 // extracellular region // non-traceable author statement	IPR001223 // Glycoside hydrolase, family 18 // 7.9E-86
7514	148713_at	1.86805	1.4329	18.7369	1.27249e-18	2.82977e-16	32.5003	FBgn0036364	CG14109	CG14109	CG14109	39512	---	---	---	---
10763	151962_at	2.97285	2.30279	18.6811	1.38723e-18	3.03672e-16	32.4141	FBgn0034920	CG5597	CG5597	CG5597	37789	---	---	---	IPR007110 // Immunoglobulin-like // 5.7E-5
7266	148465_at	1.82495	1.59946	18.5234	1.77237e-18	3.76225e-16	32.1695	FBgn0035996	CG3448	CG3448	CG3448	39094	5515 // protein binding // inferred from physical interaction	---	---	---
2591	143790_at	1.41241	0.912462	18.2474	2.73336e-18	5.54991e-16	31.7366	FBgn0015286	CG2849	Rala	Ras-related protein	31332	3924 // GTPase activity // inferred from sequence or structural similarity /// 3924 // GTPase activity // non-traceable author statement /// 5525 // GTP binding // inferred from electronic annotation /// 5515 // protein binding // inferred from physical interaction /// 166 // nucleotide binding // inferred from electronic annotation /// 3924 // GTPase activity // inferred from sequence similarity	6886 // intracellular protein transport // inferred from electronic annotation /// 6898 // receptor mediated endocytosis // inferred from electronic annotation /// 7186 // G-protein coupled receptor protein signaling pathway // inferred from electronic annotation /// 7264 // small GTPase mediated signal transduction // inferred from electronic annotation /// 7268 // synaptic transmission // infer…	5622 // intracellular // inferred from electronic annotation /// 16020 // membrane // inferred from electronic annotation	IPR001806 // Ras GTPase superfamily // 1.7E-86 /// IPR001806 // Ras GTPase superfamily // 1.3E-85
5214	146413_at	1.91747	3.25459	18.1921	2.9829e-18	5.97006e-16	31.6493	FBgn0032652	CG6870	CG6870	CG6870	35067	16491 // oxidoreductase activity // inferred from electronic annotation /// 5506 // iron ion binding // inferred from electronic annotation /// 46872 // metal ion binding // inferred from electronic annotation	6118 // electron transport // inferred from electronic annotation /// 8202 // steroid metabolism // inferred from electronic annotation	5792 // microsome // inferred from sequence or structural similarity /// 5792 // microsome // inferred from sequence similarity	IPR001199 // Cytochrome b5 // 7.9E-19
12430	153629_at	1.5607	1.00227	18.1737	3.07103e-18	6.00795e-16	31.6202	FBgn0020270	CG16928	mre11	meiotic recombination 11	34565	3676 // nucleic acid binding // inferred from electronic annotation /// 4519 // endonuclease activity // inferred from sequence or structural similarity /// 4519 // endonuclease activity // non-traceable author statement /// 4520 // endodeoxyribonuclease activity // inferred from electronic annotation /// 4527 // exonuclease activity // inferred from sequence or structural similarity /// 4527 // …	723 // telomere maintenance // inferred from mutant phenotype /// 6289 // nucleotide-excision repair // non-traceable author statement /// 6302 // double-strand break repair // inferred from sequence or structural similarity /// 7001 // chromosome organization and biogenesis (sensu Eukaryota) // inferred from mutant phenotype /// 7126 // meiosis // inferred from electronic annotation /// 6259 // …	5634 // nucleus // inferred from electronic annotation	IPR004843 // Metallo-phosphoesterase // 9.5E-21 /// IPR007281 // Mre11 DNA-binding presumed domain // 1.0E-126
7931	149130_at	1.72788	0.053695	18.0055	4.01311e-18	7.39785e-16	31.3527	FBgn0036995	CG5195	CG5195	CG5195	40266	166 // nucleotide binding // inferred from electronic annotation /// 3677 // DNA binding // inferred from electronic annotation /// 3887 // DNA-directed DNA polymerase activity // inferred from electronic annotation /// 8408 // 3'-5' exonuclease activity // inferred from electronic annotation	6260 // DNA replication // inferred from electronic annotation /// 7155 // cell adhesion // inferred from electronic annotation /// 19226 // transmission of nerve impulse // inferred from electronic annotation	---	IPR001611 // Leucine-rich repeat // 0.0019 /// IPR001611 // Leucine-rich repeat // 0.0021 /// IPR001611 // Leucine-rich repeat // 0.024 /// IPR001611 // Leucine-rich repeat // 0.2 /// IPR001611 // Leucine-rich repeat // 0.0032 /// IPR001611 // Leucine-rich repeat // 0.038 /// IPR001611 // Leucine-rich repeat // 0.014 /// IPR001611 // Leucine-rich repeat // 9.5E-4 /// IPR001611 // Leucine-rich rep…
12185	153384_at	1.76876	1.5114	17.9895	4.11717e-18	7.49111e-16	31.3271	FBgn0031695	CG14031	Cyp4ac3	Cyp4ac3	33756	4497 // monooxygenase activity // inferred from electronic annotation /// 16491 // oxidoreductase activity // inferred from electronic annotation /// 5506 // iron ion binding // inferred from electronic annotation /// 20037 // heme binding // inferred from electronic annotation /// 46872 // metal ion binding // inferred from electronic annotation	6118 // electron transport // inferred from electronic annotation	5792 // microsome // non-traceable author statement /// 16020 // membrane // non-traceable author statement /// 5783 // endoplasmic reticulum // inferred from electronic annotation /// 5792 // microsome // inferred from electronic annotation /// 16020 // membrane // inferred from electronic annotation	IPR001128 // Cytochrome P450 // 1.5E-98
1165	142364_at	0.937488	1.60265	17.961	4.30931e-18	7.6422e-16	31.2814	FBgn0042712	CG1898	HBS1	HBS1	117365	3746 // translation elongation factor activity // inferred from electronic annotation /// 3747 // translation release factor activity // inferred from sequence or structural similarity /// 5525 // GTP binding // inferred from electronic annotation /// 3747 // translation release factor activity // inferred from sequence similarity	6415 // translational termination // inferred from sequence or structural similarity /// 6445 // regulation of translation // inferred from electronic annotation /// 6412 // protein biosynthesis // inferred from electronic annotation /// 6415 // translational termination // inferred from sequence similarity	5829 // cytosol // inferred from sequence or structural similarity /// 5829 // cytosol // inferred from sequence similarity	IPR004161 // Elongation factor Tu, domain 2 // 2.4E-12 /// IPR000795 // Protein synthesis factor, GTP-binding // 2.1E-77 /// IPR004160 // Elongation factor Tu, C-terminal // 3.7E-16
6011	147210_at	1.79137	3.01457	17.853	5.12448e-18	8.83317e-16	31.1081	FBgn0033945	CG12868	CG12868	CG12868	36620	---	---	---	---
6495	147694_at	1.23529	1.48246	17.8475	5.17002e-18	8.83317e-16	31.0993	FBgn0034756	CG4373	Cyp6d2	Cyp6d2	37594	4497 // monooxygenase activity // inferred from electronic annotation /// 16491 // oxidoreductase activity // inferred from electronic annotation /// 5506 // iron ion binding // inferred from electronic annotation /// 16712 // oxidoreductase activity, acting on paired donors, with incorporation or reduction of molecular oxygen, reduced flavin or flavoprotein as one donor, and incorporation of one…	6118 // electron transport // inferred from electronic annotation /// 8202 // steroid metabolism // inferred from electronic annotation	5792 // microsome // non-traceable author statement /// 16020 // membrane // non-traceable author statement /// 5783 // endoplasmic reticulum // inferred from electronic annotation /// 5792 // microsome // inferred from electronic annotation /// 16020 // membrane // inferred from electronic annotation	IPR001128 // Cytochrome P450 // 2.0E-74
563	141762_at	1.3252	4.59807	17.7026	6.53213e-18	1.07665e-15	30.8653	FBgn0013770	CG6692	Cp1	Cysteine proteinase-1	36546	3676 // nucleic acid binding // inferred from electronic annotation /// 4217 // cathepsin L activity // inferred from sequence or structural similarity /// 4217 // cathepsin L activity // non-traceable author statement /// 5515 // protein binding // inferred from physical interaction /// 4197 // cysteine-type endopeptidase activity // inferred from electronic annotation /// 8233 // peptidase acti…	6355 // regulation of transcription, DNA-dependent // inferred from electronic annotation /// 6508 // proteolysis // inferred from electronic annotation /// 30163 // protein catabolism // non-traceable author statement /// 35071 // salivary gland cell autophagic cell death // inferred from expression pattern /// 48102 // autophagic cell death // inferred from expression pattern /// 7275 // develo…	5764 // lysosome // non-traceable author statement /// 5764 // lysosome // inferred from electronic annotation	IPR000668 // Peptidase C1A, papain // 1.0E-126 /// IPR000668 // Peptidase C1A, papain // 1.0E-126
10605	151804_at	1.24761	5.26271	17.6852	6.71843e-18	1.09448e-15	30.8371	FBgn0037637	CG9836	CG9836	CG9836	41059	5515 // protein binding // inferred from physical interaction	6807 // nitrogen compound metabolism // inferred from electronic annotation /// 19740 // nitrogen utilization // inferred from electronic annotation	---	IPR002871 // Nitrogen-fixing NifU-like, N-terminal // 2.9E-81
34	141233_at	2.62599	2.76223	17.6708	6.87705e-18	1.10744e-15	30.8137	FBgn0029831	CG5966	CG5966	CG5966	31532	4806 // triacylglycerol lipase activity // inferred from sequence or structural similarity /// 3824 // catalytic activity // inferred from electronic annotation /// 4806 // triacylglycerol lipase activity // inferred from sequence similarity	6629 // lipid metabolism // inferred from electronic annotation	---	IPR000734 // Lipase // 5.1E-77
13133	154332_at	1.53363	2.80586	17.5348	8.58073e-18	1.36609e-15	30.5922	FBgn0039541	CG12876	CG12876	CG12876	43330	4871 // signal transducer activity // inferred from sequence or structural similarity /// 5057 // receptor signaling protein activity // inferred from electronic annotation /// 5515 // protein binding // inferred from physical interaction /// 4871 // signal transducer activity // inferred from sequence similarity	6917 // induction of apoptosis // inferred from electronic annotation /// 7165 // signal transduction // inferred from electronic annotation	---	IPR004328 // BRO1 // 6.1E-84
10719	151918_s_at	1.50193	3.68098	17.2943	1.27344e-17	1.92053e-15	30.1968	FBgn0027594	CG2086	drpr	draper	38218	4872 // receptor activity // inferred from electronic annotation /// 5201 // extracellular matrix structural constituent // inferred from electronic annotation /// 5198 // structural molecule activity // inferred from electronic annotation	6909 // phagocytosis // inferred from mutant phenotype /// 6909 // phagocytosis // traceable author statement /// 7155 // cell adhesion // inferred from sequence or structural similarity /// 7165 // signal transduction // inferred from electronic annotation /// 7398 // ectoderm development // inferred from electronic annotation /// 7399 // nervous system development // inferred from electronic an…	31224 // intrinsic to membrane // non-traceable author statement	IPR006209 // EGF-like domain // 1.1E-4 /// IPR006209 // EGF-like domain // 7.8E-6 /// IPR006209 // EGF-like domain // 2.0E-4 /// IPR006209 // EGF-like domain // 1.9E-5 /// IPR006209 // EGF-like domain // 7.2E-6 /// IPR006209 // EGF-like domain // 2.1E-4 /// IPR006209 // EGF-like domain // 1.4E-5 /// IPR006209 // EGF-like domain // 2.2E-4 /// IPR006209 // EGF-like domain // 9.2E-5 /// IPR006209 //…
13592	154791_at	2.93599	3.15238	17.2936	1.27487e-17	1.92053e-15	30.1956	FBgn0031037	CG14207	CG14207	CG14207	32955	5515 // protein binding // inferred from physical interaction	---	---	IPR002068 // Heat shock protein Hsp20 // 2.4E-23 /// IPR002068 // Heat shock protein Hsp20 // 2.4E-23
1338	142537_at	1.61375	3.31213	17.2214	1.43657e-17	2.11857e-15	30.076	FBgn0063494	CG17530	GstE6	Glutathione S transferase E6	37111	4364 // glutathione transferase activity // inferred from sequence or structural similarity /// 4364 // glutathione transferase activity // inferred from sequence similarity	6800 // oxygen and reactive oxygen species metabolism // inferred from electronic annotation /// 6952 // defense response // inferred from electronic annotation /// 9636 // response to toxin // inferred from electronic annotation	---	IPR004046 // Glutathione S-transferase, C-terminal // 1.4E-11 /// IPR004045 // Glutathione S-transferase, N-terminal // 4.7E-18
4589	145788_at	1.88567	2.10562	17.1822	1.53299e-17	2.19518e-15	30.0109	FBgn0031643	CG3008	CG3008	CG3008	33693	4672 // protein kinase activity // non-traceable author statement /// 16301 // kinase activity // inferred from electronic annotation /// 16740 // transferase activity // inferred from electronic annotation	6468 // protein amino acid phosphorylation // inferred from electronic annotation	---	IPR000687 // Protein of unknown function RIO1 // 5.4E-107
5086	146285_at	2.27182	2.25696	17.185	1.52579e-17	2.19518e-15	30.0156	FBgn0043841	CG31764	vir-1	virus-induced RNA 1	34652	---	---	---	---
11271	152470_at	0.98306	1.24828	17.1263	1.68208e-17	2.3804e-15	29.9179	FBgn0032793	CG10189	CG10189	CG10189	35234	---	---	---	---
154	141353_at	2.72734	2.00383	16.9411	2.2924e-17	3.17289e-15	29.6076	FBgn0038299	CG6687	CG6687	CG6687	41829	4867 // serine-type endopeptidase inhibitor activity // inferred from sequence or structural similarity /// 46933 // hydrogen-transporting ATP synthase activity, rotational mechanism // inferred from electronic annotation /// 46961 // hydrogen-transporting ATPase activity, rotational mechanism // inferred from electronic annotation /// 5515 // protein binding // inferred from physical interaction…	6508 // proteolysis // inferred from electronic annotation /// 15986 // ATP synthesis coupled proton transport // inferred from electronic annotation	16020 // membrane // inferred from electronic annotation /// 16469 // proton-transporting two-sector ATPase complex // inferred from electronic annotation	IPR000215 // Serpin // 4.7E-69
2582	143781_at	1.68534	2.24211	16.9365	2.31003e-17	3.17289e-15	29.5999	FBgn0015035	CG4105	Cyp4e3	Cytochrome P450-4e3	34291	4497 // monooxygenase activity // inferred from electronic annotation /// 16491 // oxidoreductase activity // inferred from electronic annotation /// 5506 // iron ion binding // inferred from electronic annotation /// 20037 // heme binding // inferred from electronic annotation /// 46872 // metal ion binding // inferred from electronic annotation	6118 // electron transport // inferred from electronic annotation /// 8202 // steroid metabolism // inferred from electronic annotation	5792 // microsome // non-traceable author statement /// 16020 // membrane // non-traceable author statement /// 5783 // endoplasmic reticulum // inferred from electronic annotation /// 5792 // microsome // inferred from electronic annotation /// 16020 // membrane // inferred from electronic annotation	IPR001128 // Cytochrome P450 // 3.7E-94 /// IPR001128 // Cytochrome P450 // 5.6E-76
269	141468_at	1.70347	2.6193	16.9091	2.41905e-17	3.29038e-15	29.5536	FBgn0036702	CG6512	CG6512	CG6512	39922	166 // nucleotide binding // inferred from electronic annotation /// 4222 // metalloendopeptidase activity // inferred from sequence or structural similarity /// 5524 // ATP binding // inferred from electronic annotation /// 16887 // ATPase activity // inferred from sequence or structural similarity /// 5515 // protein binding // inferred from physical interaction /// 4222 // metalloendopeptidase…	6510 // ATP-dependent proteolysis // inferred from sequence or structural similarity /// 7067 // mitosis // inferred from electronic annotation /// 6508 // proteolysis // inferred from electronic annotation /// 30163 // protein catabolism // inferred from electronic annotation /// 6510 // ATP-dependent proteolysis // inferred from sequence similarity	5739 // mitochondrion // inferred from sequence or structural similarity /// 5783 // endoplasmic reticulum // inferred from sequence or structural similarity /// 16020 // membrane // inferred from electronic annotation /// 16021 // integral to membrane // inferred from electronic annotation /// 5739 // mitochondrion // inferred from sequence similarity /// 5783 // endoplasmic reticulum // inferre…	IPR000642 // Peptidase M41 // 3.5E-108 /// IPR003959 // AAA ATPase, central region // 1.8E-92 /// IPR005936 // Peptidase M41, FtsH // 2.5E-41 /// IPR000642 // Peptidase M41 // 3.5E-108 /// IPR003959 // AAA ATPase, central region // 1.8E-92 /// IPR005936 // Peptidase M41, FtsH // 2.5E-41
10917	152116_at	1.35966	3.164	16.8863	2.51372e-17	3.35403e-15	29.5151	FBgn0020414	CG4559	Idgf3	Imaginal disc growth factor 3	34981	4568 // chitinase activity // inferred from sequence or structural similarity /// 8084 // imaginal disc growth factor activity // inferred from direct assay /// 16799 // hydrolase activity, hydrolyzing N-glycosyl compounds // inferred from electronic annotation /// 4553 // hydrolase activity, hydrolyzing O-glycosyl compounds // inferred from electronic annotation /// 4568 // chitinase activity //…	7165 // signal transduction // inferred from electronic annotation /// 7267 // cell-cell signaling // inferred from electronic annotation /// 7444 // imaginal disc development // inferred from direct assay /// 8152 // metabolism // inferred from electronic annotation /// 5975 // carbohydrate metabolism // inferred from electronic annotation /// 6032 // chitin catabolism // inferred from electroni…	5576 // extracellular region // inferred from direct assay /// 5576 // extracellular region // non-traceable author statement	IPR001223 // Glycoside hydrolase, family 18 // 1.5E-97
12160	153359_at	1.44373	3.37558	16.8392	2.72142e-17	3.5969e-15	29.4355	FBgn0040309	CG1633	Jafrac1	thioredoxin peroxidase 1	53578	4601 // peroxidase activity // non-traceable author statement /// 4602 // glutathione peroxidase activity // inferred from direct assay /// 8379 // thioredoxin peroxidase activity // inferred from direct assay /// 8379 // thioredoxin peroxidase activity // inferred from sequence or structural similarity /// 8379 // thioredoxin peroxidase activity // non-traceable author statement /// 16209 // ant…	6800 // oxygen and reactive oxygen species metabolism // inferred from electronic annotation /// 6952 // defense response // inferred from electronic annotation /// 45454 // cell redox homeostasis // inferred from direct assay	5829 // cytosol // inferred from direct assay /// 5829 // cytosol // non-traceable author statement	IPR000866 // Alkyl hydroperoxide reductase/ Thiol specific antioxidant/ Mal allergen // 1.1E-76
5559	146758_at	1.8165	1.27752	16.6852	3.53189e-17	4.58164e-15	29.174	FBgn0033207	CG12826	CG12826	CG12826	35710	---	---	---	---
431	141630_at	1.30557	1.92767	16.5607	4.36701e-17	5.46266e-15	28.9611	FBgn0034728	CG6339	rad50	rad50	37564	3684 // damaged DNA binding // inferred from electronic annotation /// 4520 // endodeoxyribonuclease activity // inferred from electronic annotation /// 4529 // exodeoxyribonuclease activity // inferred from electronic annotation /// 5524 // ATP binding // inferred from electronic annotation /// 16829 // lyase activity // inferred from electronic annotation /// 16887 // ATPase activity // inferre…	723 // telomere maintenance // inferred from mutant phenotype /// 2168 // larval development (sensu Insecta) // inferred from mutant phenotype /// 6281 // DNA repair // inferred from sequence or structural similarity /// 6310 // DNA recombination // inferred from electronic annotation /// 7001 // chromosome organization and biogenesis (sensu Eukaryota) // inferred from mutant phenotype /// 722 //…	30870 // Mre11 complex // inferred from electronic annotation /// 793 // condensed chromosome // inferred from direct assay /// 781 // chromosome, telomeric region // inferred from electronic annotation /// 5634 // nucleus // inferred from electronic annotation /// 5694 // chromosome // inferred from electronic annotation /// 30870 // Mre11 complex // traceable author statement	IPR007517 // Rad50 zinc hook motif // 2.3E-19
1840	143039_at	1.27313	1.48913	16.4704	5.09696e-17	6.16541e-15	28.806	FBgn0028411	CG12752	Nxt1	NTF2-related export protein 1	37769	8565 // protein transporter activity // inferred from electronic annotation /// 5215 // transporter activity // inferred from electronic annotation	6406 // mRNA export from nucleus // non-traceable author statement /// 6408 // snRNA export from nucleus // non-traceable author statement /// 6409 // tRNA export from nucleus // non-traceable author statement /// 6606 // protein import into nucleus // inferred from electronic annotation /// 6611 // protein export from nucleus // non-traceable author statement /// 16973 // poly(A)+ mRNA export fr…	5634 // nucleus // non-traceable author statement /// 5635 // nuclear envelope // inferred from direct assay /// 5654 // nucleoplasm // inferred from direct assay /// 5737 // cytoplasm // inferred from direct assay /// 5622 // intracellular // inferred from electronic annotation /// 5634 // nucleus // inferred from electronic annotation	IPR002075 // Nuclear transport factor 2 (NTF2) // 3.0E-36
2491	143690_at	1.12199	0.878146	16.2745	7.1468e-17	8.42693e-15	28.4666	FBgn0011769	CG4205	Fdxh	Ferredoxin	39070	9055 // electron carrier activity // inferred from sequence or structural similarity /// 9055 // electron carrier activity // non-traceable author statement /// 16491 // oxidoreductase activity // inferred from electronic annotation /// 5506 // iron ion binding // inferred from electronic annotation /// 46872 // metal ion binding // inferred from electronic annotation /// 51536 // iron-sulfur clu…	6124 // ferredoxin metabolism // inferred from electronic annotation /// 6118 // electron transport // inferred from electronic annotation /// 6810 // transport // inferred from electronic annotation	5739 // mitochondrion // inferred from electronic annotation	IPR001041 // Ferredoxin // 5.6E-8
3362	144561_at	2.50187	2.08364	16.2676	7.23306e-17	8.42693e-15	28.4546	FBgn0029823	CG3011	CG3011	CG3011	31524	4372 // glycine hydroxymethyltransferase activity // inferred from sequence or structural similarity /// 5515 // protein binding // inferred from physical interaction /// 4372 // glycine hydroxymethyltransferase activity // inferred from electronic annotation /// 4372 // glycine hydroxymethyltransferase activity // inferred from sequence similarity	6139 // nucleobase, nucleoside, nucleotide and nucleic acid metabolism // inferred from electronic annotation /// 6544 // glycine metabolism // inferred from electronic annotation /// 6564 // L-serine biosynthesis // inferred from sequence or structural similarity /// 6563 // L-serine metabolism // inferred from electronic annotation /// 6564 // L-serine biosynthesis // inferred from sequence sim…	5739 // mitochondrion // inferred from sequence or structural similarity /// 5739 // mitochondrion // inferred from sequence similarity	IPR001085 // Glycine hydroxymethyltransferase // 1.0E-126
10633	151832_at	1.04652	1.42314	16.2367	7.63127e-17	8.76345e-15	28.4007	FBgn0022774	CG8782	Oat	Ornithine aminotransferase precursor	40145	4587 // ornithine-oxo-acid transaminase activity // inferred from sequence or structural similarity /// 4587 // ornithine-oxo-acid transaminase activity // non-traceable author statement /// 30170 // pyridoxal phosphate binding // inferred from electronic annotation /// 4587 // ornithine-oxo-acid transaminase activity // inferred from electronic annotation /// 8483 // transaminase activity // inf…	6591 // ornithine metabolism // inferred from sequence or structural similarity /// 6591 // ornithine metabolism // non-traceable author statement /// 8652 // amino acid biosynthesis // inferred from electronic annotation /// 6591 // ornithine metabolism // inferred from sequence similarity	5739 // mitochondrion // inferred from direct assay /// 5759 // mitochondrial matrix // inferred from sequence or structural similarity /// 5759 // mitochondrial matrix // non-traceable author statement /// 5739 // mitochondrion // inferred from electronic annotation /// 5759 // mitochondrial matrix // inferred from sequence similarity	IPR005814 // Aminotransferase class-III // 1.0E-126
10879	152078_at	0.974128	1.54682	16.1528	8.83098e-17	9.89776e-15	28.2541	FBgn0031824	CG9547	CG9547	CG9547	33911	4361 // glutaryl-CoA dehydrogenase activity // inferred from sequence or structural similarity /// 5515 // protein binding // inferred from physical interaction /// 3995 // acyl-CoA dehydrogenase activity // inferred from electronic annotation /// 16491 // oxidoreductase activity // inferred from electronic annotation /// 4361 // glutaryl-CoA dehydrogenase activity // inferred from sequence simil…	6118 // electron transport // inferred from electronic annotation /// 6554 // lysine catabolism // inferred from sequence or structural similarity /// 6568 // tryptophan metabolism // inferred from sequence or structural similarity /// 6637 // acyl-CoA metabolism // inferred from electronic annotation /// 46948 // hydroxylysine catabolism // inferred from sequence or structural similarity /// 655…	5759 // mitochondrial matrix // inferred from sequence or structural similarity /// 5759 // mitochondrial matrix // inferred from sequence similarity	IPR006091 // Acyl-CoA dehydrogenase, central domain // 2.6E-16 /// IPR006092 // Acyl-CoA dehydrogenase, N-terminal // 2.1E-13 /// IPR006090 // Acyl-CoA dehydrogenase, C-terminal // 5.8E-42
11951	153150_at	1.65128	2.90208	16.0707	1.01927e-16	1.13333e-14	28.11	FBgn0014427	CG11899	CG11899	CG11899	46391	4648 // phosphoserine transaminase activity // inferred from sequence or structural similarity /// 4648 // phosphoserine transaminase activity // non-traceable author statement /// 5515 // protein binding // inferred from physical interaction /// 8483 // transaminase activity // inferred from electronic annotation /// 4648 // phosphoserine transaminase activity // inferred from electronic annotat…	6564 // L-serine biosynthesis // non-traceable author statement /// 8615 // pyridoxine biosynthesis // non-traceable author statement /// 6564 // L-serine biosynthesis // inferred from electronic annotation /// 8152 // metabolism // inferred from electronic annotation /// 8652 // amino acid biosynthesis // inferred from electronic annotation	---	IPR000192 // Aminotransferase, class V // 1.6E-86
12064	153263_at	0.998528	1.57781	15.9909	1.17251e-16	1.2636e-14	27.9693	FBgn0036548	CG5931	CG5931	CG5931	39737	3724 // RNA helicase activity // inferred from sequence or structural similarity /// 4004 // ATP-dependent RNA helicase activity // inferred from sequence or structural similarity /// 5509 // calcium ion binding // inferred from electronic annotation /// 5524 // ATP binding // inferred from electronic annotation /// 3676 // nucleic acid binding // inferred from electronic annotation /// 4386 // h…	381 // regulation of alternative nuclear mRNA splicing, via spliceosome // inferred from mutant phenotype /// 398 // nuclear mRNA splicing, via spliceosome // inferred from electronic annotation /// 8380 // RNA splicing // inferred from sequence or structural similarity /// 6397 // mRNA processing // inferred from electronic annotation /// 8380 // RNA splicing // inferred from sequence similarity	5634 // nucleus // Unknown /// 5681 // spliceosome complex // inferred from electronic annotation /// 5681 // spliceosome complex // inferred from sequence or structural similarity /// 5682 // snRNP U5 // inferred from sequence or structural similarity /// 30532 // small nuclear ribonucleoprotein complex // inferred from sequence or structural similarity /// 5634 // nucleus // inferred from elect…	IPR001650 // Helicase, C-terminal // 5.6E-12 /// IPR001410 // DEAD/DEAH box helicase // 3.7E-47 /// IPR001410 // DEAD/DEAH box helicase // 5.6E-31 /// IPR004179 // Sec63 domain // 1.0E-126 /// IPR004179 // Sec63 domain // 1.0E-126
11994	153193_at	1.27941	1.12883	15.9018	1.37169e-16	1.44491e-14	27.8117	FBgn0037617	CG8145	CG8145	CG8145	41038	3676 // nucleic acid binding // inferred from electronic annotation /// 8270 // zinc ion binding // inferred from electronic annotation /// 30528 // transcription regulator activity // inferred from electronic annotation /// 46872 // metal ion binding // inferred from electronic annotation	6139 // nucleobase, nucleoside, nucleotide and nucleic acid metabolism // inferred from electronic annotation /// 6357 // regulation of transcription from RNA polymerase II promoter // inferred from electronic annotation /// 6366 // transcription from RNA polymerase II promoter // inferred from electronic annotation /// 8283 // cell proliferation // inferred from electronic annotation	5634 // nucleus // inferred from electronic annotation	IPR007087 // Zn-finger, C2H2 type // 6.5E-5 /// IPR007087 // Zn-finger, C2H2 type // 6.5E-5
13660	154859_at	2.98317	1.56007	15.8836	1.41665e-16	1.48113e-14	27.7793	FBgn0032597	CG17904	CG17904	CG17904	35000	166 // nucleotide binding // inferred from sequence or structural similarity /// 5515 // protein binding // inferred from physical interaction /// 166 // nucleotide binding // inferred from sequence similarity	---	---	---
8434	149633_at	1.47449	2.23606	15.8676	1.45718e-16	1.51223e-14	27.7509	FBgn0037819	CG14688	CG14688	CG14688	41275	---	---	---	IPR008775 // Phytanoyl-CoA dioxygenase // 4.5E-90
8035	149234_at	0.946768	0.623339	15.7334	1.84909e-16	1.86373e-14	27.5115	FBgn0037167	CG11425	CG11425	CG11425	40472	8195 // phosphatidate phosphatase activity // inferred from sequence or structural similarity /// 8195 // phosphatidate phosphatase activity // non-traceable author statement /// 8195 // phosphatidate phosphatase activity // inferred from sequence similarity	6629 // lipid metabolism // inferred from electronic annotation /// 16311 // dephosphorylation // non-traceable author statement	---	IPR000326 // PA-phosphatase related phosphoesterase // 4.5E-45
5998	147197_at	1.73661	0.945784	15.7259	1.87405e-16	1.87539e-14	27.498	FBgn0033928	CG13941	CG13941	CG13941	36597	---	---	---	IPR005162 // Retrotransposon gag protein // 1.5E-6
12233	153432_at	2.32158	4.99825	15.7215	1.88875e-16	1.87669e-14	27.4902	FBgn0022073	CG8846	Thor	Thor	33569	8190 // eukaryotic initiation factor 4E binding // inferred from direct assay /// 8190 // eukaryotic initiation factor 4E binding // inferred from sequence or structural similarity /// 8190 // eukaryotic initiation factor 4E binding // non-traceable author statement /// 5515 // protein binding // inferred from physical interaction /// 8190 // eukaryotic initiation factor 4E binding // inferred fr…	1558 // regulation of cell growth // inferred from genetic interaction /// 1558 // regulation of cell growth // inferred from mutant phenotype /// 6950 // response to stress // inferred from expression pattern /// 6952 // defense response // non-traceable author statement /// 6955 // immune response // inferred from expression pattern /// 6955 // immune response // inferred from mutant phenotype …	---	IPR008606 // Eukaryotic translation initiation factor 4E binding // 1.0E-80
11258	152457_at	1.71727	1.62944	15.7096	1.92919e-16	1.90099e-14	27.4689	FBgn0035985	CG3672	CG3672	CG3672	39081	42302 // structural constituent of cuticle // inferred from electronic annotation	---	---	IPR000618 // Insect cuticle protein // 5.1E-5
10617	151816_at	1.28	2.18338	15.5256	2.68181e-16	2.60918e-14	27.1377	FBgn0035489	CG1135	CG1135	CG1135	38478	5515 // protein binding // inferred from physical interaction	---	5730 // nucleolus // inferred from sequence or structural similarity /// 5730 // nucleolus // inferred from sequence similarity	IPR000253 // Forkhead-associated (FHA) // 1.6E-12
11210	152409_at	2.20981	1.38145	15.3748	3.52139e-16	3.33342e-14	26.8637	FBgn0029753	CG4198	CG4198	CG4198	31445	---	---	---	---
458	141657_at	1.11047	0.716291	15.2855	4.14129e-16	3.89393e-14	26.7006	FBgn0030216	CG33175	spri	sprint	31987	17016 // Ras GTPase binding // inferred from sequence or structural similarity /// 5515 // protein binding // inferred from physical interaction /// 5096 // GTPase activator activity // inferred from electronic annotation /// 17016 // Ras GTPase binding // inferred from sequence similarity	6897 // endocytosis // inferred from sequence or structural similarity /// 7242 // intracellular signaling cascade // inferred from electronic annotation /// 7165 // signal transduction // inferred from electronic annotation /// 7275 // development // inferred from electronic annotation /// 6897 // endocytosis // inferred from sequence similarity	---	IPR003123 // Vacuolar sorting protein 9 // 1.9E-28 /// IPR000980 // SH2 motif // 2.8E-20 /// IPR000159 // RA domain // 1.8E-24 /// IPR003123 // Vacuolar sorting protein 9 // 1.9E-28 /// IPR000980 // SH2 motif // 2.8E-20 /// IPR000159 // RA domain // 1.8E-24
6526	147725_at	0.870767	1.28714	15.275	4.22171e-16	3.94307e-14	26.6812	FBgn0034793	CG13533	asrij	asrij	37637	5515 // protein binding // inferred from physical interaction	---	---	IPR009764 // Ovarian carcinoma immunoreactive antigen // 6.9E-82
3058	144257_at	1.15119	0.441585	15.2058	4.78988e-16	4.38603e-14	26.5542	FBgn0041627	CG18801	Ku80	Ku80	34930	3676 // nucleic acid binding // inferred from electronic annotation /// 3677 // DNA binding // inferred from electronic annotation /// 4003 // ATP-dependent DNA helicase activity // inferred from sequence or structural similarity /// 17116 // single-stranded DNA-dependent ATP-dependent DNA helicase activity // inferred from sequence or structural similarity /// 4003 // ATP-dependent DNA helicase …	723 // telomere maintenance // inferred from mutant phenotype /// 6281 // DNA repair // inferred from electronic annotation /// 6303 // double-strand break repair via nonhomologous end joining // inferred from electronic annotation /// 6310 // DNA recombination // inferred from electronic annotation	5958 // DNA-dependent protein kinase complex // inferred from electronic annotation /// 17117 // single-stranded DNA-dependent ATP-dependent DNA helicase complex // inferred from sequence or structural similarity /// 5634 // nucleus // inferred from electronic annotation /// 17117 // single-stranded DNA-dependent ATP-dependent DNA helicase complex // inferred from sequence similarity	IPR006164 // Ku // 1.5E-64 /// IPR005161 // Ku70/Ku80 N-terminal alpha/beta domain // 8.1E-65
2072	143271_at	1.88296	4.25545	15.1977	4.86157e-16	4.42277e-14	26.5392	FBgn0002789	CG4696	Mp20	Muscle protein 20	36468	3779 // actin binding // inferred from sequence or structural similarity /// 5200 // structural constituent of cytoskeleton // inferred from electronic annotation /// 5509 // calcium ion binding // inferred from sequence or structural similarity /// 5515 // protein binding // inferred from physical interaction /// 3779 // actin binding // inferred from sequence similarity /// 5509 // calcium ion …	6936 // muscle contraction // inferred from electronic annotation /// 7155 // cell adhesion // inferred from mutant phenotype /// 7517 // muscle development // inferred from electronic annotation /// 8360 // regulation of cell shape // inferred from mutant phenotype	43292 // contractile fiber // non-traceable author statement	IPR001715 // Calponin-like actin-binding // 1.2E-21 /// IPR000557 // Calponin repeat // 2.5E-6
2603	143802_at	1.27931	0.981795	15.1811	5.0112e-16	4.50044e-14	26.5087	FBgn0015351	CG14906	CG14906	CG14906	42030	8168 // methyltransferase activity // inferred from electronic annotation	6139 // nucleobase, nucleoside, nucleotide and nucleic acid metabolism // inferred from electronic annotation	5634 // nucleus // inferred from electronic annotation	IPR007757 // MT-A70 // 9.4E-92
8842	150041_at	1.41833	1.62642	15.1583	5.22438e-16	4.60843e-14	26.4668	FBgn0038467	CG3590	CG3590	CG3590	42051	4018 // adenylosuccinate lyase activity // inferred from sequence or structural similarity /// 3824 // catalytic activity // inferred from electronic annotation /// 4018 // adenylosuccinate lyase activity // inferred from electronic annotation /// 16829 // lyase activity // inferred from electronic annotation /// 4018 // adenylosuccinate lyase activity // inferred from sequence similarity	6144 // purine base metabolism // inferred from electronic annotation /// 9152 // purine ribonucleotide biosynthesis // inferred from electronic annotation	---	IPR000362 // Fumarate lyase // 6.3E-70
13567	154766_at	0.986718	1.74926	15.1577	5.23012e-16	4.60843e-14	26.4657	FBgn0030026	CG10964	sni	sniffer	31761	4090 // carbonyl reductase (NADPH) activity // inferred from direct assay /// 16491 // oxidoreductase activity // inferred from electronic annotation	8152 // metabolism // inferred from electronic annotation	---	IPR002198 // Short-chain dehydrogenase/reductase SDR // 7.6E-21
4201	145400_f_at	1.52624	1.50183	15.1264	5.5398e-16	4.85079e-14	26.4078	FBgn0026175	CG11941	skpC	skpC	32996	3676 // nucleic acid binding // inferred from electronic annotation /// 19237 // centromeric DNA binding // inferred from electronic annotation	6508 // proteolysis // inferred from electronic annotation /// 7049 // cell cycle // inferred from electronic annotation /// 7059 // chromosome segregation // inferred from electronic annotation /// 7067 // mitosis // inferred from electronic annotation /// 19538 // protein metabolism // inferred from electronic annotation	---	IPR001232 // SKP1 component // 3.4E-36 /// IPR001232 // SKP1 component // 3.9E-21
11945	153144_at	2.2337	3.20177	15.1077	5.73322e-16	4.98897e-14	26.3732	FBgn0014455	CG11654	Ahcy13	Adenosylhomocysteinase at 13	32471	4013 // adenosylhomocysteinase activity // inferred from sequence or structural similarity /// 4013 // adenosylhomocysteinase activity // non-traceable author statement /// 4013 // adenosylhomocysteinase activity // inferred from electronic annotation /// 16787 // hydrolase activity // inferred from electronic annotation /// 4013 // adenosylhomocysteinase activity // inferred from sequence simila…	6144 // purine base metabolism // inferred from electronic annotation /// 6730 // one-carbon compound metabolism // inferred from electronic annotation	---	IPR000043 // S-adenosyl-L-homocysteine hydrolase // 2.6E-116 /// IPR000043 // S-adenosyl-L-homocysteine hydrolase // 7.9E-88 /// IPR000043 // S-adenosyl-L-homocysteine hydrolase // 6.4E-69
11556	152755_at	1.72784	2.64669	15.0626	6.22894e-16	5.38688e-14	26.2898	FBgn0033269	CG8709	CG8709	CG8709	35790	---	6629 // lipid metabolism // inferred from electronic annotation /// 7275 // development // inferred from electronic annotation	---	IPR007651 // Lipin, N-terminal conserved region // 1.6E-74
12544	153743_at	0.899915	0.833632	14.9981	7.01595e-16	5.99351e-14	26.17	FBgn0037478	CG2656	CG2656	CG2656	40857	5524 // ATP binding // inferred from electronic annotation /// 17076 // purine nucleotide binding // inferred from sequence or structural similarity /// 17076 // purine nucleotide binding // inferred from sequence similarity	---	---	IPR004130 // Conserved hypothetical ATP binding protein // 1.0E-119
13727	154926_at	0.948093	0.426598	14.9652	7.45574e-16	6.29246e-14	26.1088	FBgn0002891	CG1925	mus205	mutagen-sensitive 205	47186	166 // nucleotide binding // inferred from electronic annotation /// 3676 // nucleic acid binding // inferred from electronic annotation /// 3677 // DNA binding // inferred from electronic annotation /// 3894 // zeta DNA polymerase activity // inferred from sequence or structural similarity /// 3894 // zeta DNA polymerase activity // non-traceable author statement /// 8408 // 3'-5' exonuclease ac…	6260 // DNA replication // non-traceable author statement /// 19985 // bypass DNA synthesis // non-traceable author statement /// 6260 // DNA replication // inferred from electronic annotation	16035 // zeta DNA polymerase complex // inferred from sequence or structural similarity /// 16035 // zeta DNA polymerase complex // non-traceable author statement /// 16035 // zeta DNA polymerase complex // inferred from sequence similarity	IPR006134 // DNA polymerase B domain // 1.0E-126
4070	145269_at	1.31816	2.02915	14.9036	8.35727e-16	6.92813e-14	25.9939	FBgn0052495 /// FBgn0030882	CG6835 /// CG32495	CG32495 /// GS	CG32495 /// Glutathione Synthetase	318053 /// 32775	4363 // glutathione synthase activity // inferred from sequence or structural similarity /// 5524 // ATP binding // inferred from electronic annotation /// 3824 // catalytic activity // inferred from electronic annotation /// 16874 // ligase activity // inferred from electronic annotation /// 4363 // glutathione synthase activity // inferred from sequence similarity	6412 // protein biosynthesis // inferred from electronic annotation /// 6750 // glutathione biosynthesis // inferred from electronic annotation /// 6750 // glutathione biosynthesis // inferred from sequence or structural similarity /// 19538 // protein metabolism // inferred from electronic annotation /// 6750 // glutathione biosynthesis // inferred from sequence similarity	---	IPR004887 // Eukaryotic glutathione synthase // 4.2E-45 /// IPR005615 // Eukaryotic glutathione synthase, ATP binding domain // 1.5E-78 /// IPR004887 // Eukaryotic glutathione synthase // 4.2E-45 /// IPR005615 // Eukaryotic glutathione synthase, ATP binding domain // 8.3E-125 /// IPR004887 // Eukaryotic glutathione synthase // 4.2E-45 /// IPR005615 // Eukaryotic glutathione synthase, ATP binding …
12437	153636_at	1.06348	2.06828	14.7799	1.05224e-15	8.52132e-14	25.7619	FBgn0027049	CG7769	DDB1	DDB1	41611	3684 // damaged DNA binding // inferred from sequence or structural similarity /// 4365 // glyceraldehyde-3-phosphate dehydrogenase (phosphorylating) activity // inferred from electronic annotation /// 3676 // nucleic acid binding // inferred from electronic annotation /// 3684 // damaged DNA binding // inferred from sequence similarity	6096 // glycolysis // inferred from electronic annotation /// 6139 // nucleobase, nucleoside, nucleotide and nucleic acid metabolism // inferred from electronic annotation /// 6289 // nucleotide-excision repair // inferred from sequence or structural similarity /// 6289 // nucleotide-excision repair // non-traceable author statement /// 6289 // nucleotide-excision repair // inferred from sequence…	5634 // nucleus // inferred from electronic annotation	IPR004871 // CPSF A subunit, C-terminal // 1.0E-126
8319	149518_at	1.52592	1.64434	14.7695	1.07281e-15	8.63798e-14	25.7424	FBgn0037612	CG8112	CG8112	CG8112	41033	4772 // sterol O-acyltransferase activity // inferred from sequence or structural similarity /// 4772 // sterol O-acyltransferase activity // inferred from sequence similarity	8203 // cholesterol metabolism // inferred from electronic annotation	---	IPR004299 // Membrane bound O-acyl transferase, MBOAT // 4.7E-23
1332	142531_at	1.60126	2.57666	14.7135	1.19143e-15	9.44509e-14	25.6368	FBgn0004926	CG4153	eIF-2	Eukaryotic initiation factor 2	39433	49 // tRNA binding // non-traceable author statement /// 3743 // translation initiation factor activity // inferred from sequence or structural similarity /// 3743 // translation initiation factor activity // non-traceable author statement /// 5525 // GTP binding // non-traceable author statement /// 5515 // protein binding // inferred from physical interaction /// 3743 // translation initiation …	1677 // formation of translation initiation ternary complex // non-traceable author statement /// 6413 // translational initiation // inferred from sequence or structural similarity /// 6445 // regulation of translation // inferred from electronic annotation /// 6412 // protein biosynthesis // inferred from electronic annotation /// 6413 // translational initiation // inferred from electronic ann…	5829 // cytosol // inferred from sequence or structural similarity /// 5850 // eukaryotic translation initiation factor 2 complex // inferred from sequence or structural similarity /// 5850 // eukaryotic translation initiation factor 2 complex // non-traceable author statement /// 5829 // cytosol // inferred from sequence similarity /// 5850 // eukaryotic translation initiation factor 2 complex /…	IPR002735 // Translation initiation factor IF5 // 2.7E-74
2019	143218_at	1.21063	1.46371	14.7028	1.21558e-15	9.51409e-14	25.6166	FBgn0001977	CG4180	l(2)35Bg	lethal (2) 35Bg	49424	5515 // protein binding // inferred from physical interaction	---	---	IPR007785 // Protein of unknown function DUF689 // 2.3E-97
12027	153226_at	2.03596	2.07743	14.6518	1.33792e-15	1.0299e-13	25.52	FBgn0046812	CG7439	AGO2	Argonaute 2	39683	3743 // translation initiation factor activity // inferred from sequence or structural similarity /// 5515 // protein binding // inferred from physical interaction /// 3723 // RNA binding // inferred from electronic annotation /// 3743 // translation initiation factor activity // inferred from sequence similarity	6413 // translational initiation // inferred from sequence or structural similarity /// 16246 // RNA interference // inferred from mutant phenotype /// 16246 // RNA interference // non-traceable author statement /// 16246 // RNA interference // traceable author statement /// 30422 // RNA interference, production of siRNA // inferred from direct assay /// 30423 // RNA interference, targeting of mR…	16442 // RNA-induced silencing complex // inferred from direct assay /// 16442 // RNA-induced silencing complex // traceable author statement	IPR003100 // Argonaute and Dicer protein, PAZ // 4.6E-50 /// IPR003165 // Stem cell self-renewal protein Piwi // 3.8E-89 /// IPR003100 // Argonaute and Dicer protein, PAZ // 4.6E-50 /// IPR003165 // Stem cell self-renewal protein Piwi // 3.8E-89
462	141661_at	1.19843	1.20476	14.5765	1.54171e-15	1.16126e-13	25.3771	FBgn0010278	CG4817	Ssrp	Structure specific recognition protein	37767	217 // DNA secondary structure binding // inferred from sequence or structural similarity /// 3697 // single-stranded DNA binding // inferred from sequence or structural similarity /// 3697 // single-stranded DNA binding // non-traceable author statement /// 3727 // single-stranded RNA binding // non-traceable author statement /// 5515 // protein binding // inferred from physical interaction /// …	1672 // regulation of chromatin assembly or disassembly // inferred from mutant phenotype /// 6357 // regulation of transcription from RNA polymerase II promoter // inferred from electronic annotation /// 6355 // regulation of transcription, DNA-dependent // inferred from electronic annotation	5634 // nucleus // inferred from sequence or structural similarity /// 5634 // nucleus // non-traceable author statement /// 5730 // nucleolus // non-traceable author statement /// 35101 // FACT complex // traceable author statement /// 5634 // nucleus // inferred from electronic annotation /// 5634 // nucleus // inferred from sequence similarity	IPR000969 // Structure-specific recognition protein // 1.0E-126 /// IPR000910 // HMG1/2 (high mobility group) box // 3.1E-33
13717	154916_at	0.961075	1.57993	14.5482	1.6265e-15	1.21857e-13	25.3232	FBgn0034431	CG7417	Tab2	Tab2	37216	3700 // transcription factor activity // non-traceable author statement /// 5515 // protein binding // inferred from physical interaction /// 8270 // zinc ion binding // inferred from electronic annotation	43123 // positive regulation of I-kappaB kinase/NF-kappaB cascade // non-traceable author statement /// 45449 // regulation of transcription // non-traceable author statement /// 46330 // positive regulation of JNK cascade // non-traceable author statement	5634 // nucleus // non-traceable author statement	IPR003892 // Ubiquitin system component Cue // 4.8E-10
11516	152715_at	1.47181	3.6711	14.5257	1.69707e-15	1.26468e-13	25.2804	FBgn0033188	CG1600	CG1600	CG1600	35687	4024 // alcohol dehydrogenase activity, zinc-dependent // inferred from electronic annotation /// 8270 // zinc ion binding // inferred from electronic annotation /// 16491 // oxidoreductase activity // inferred from electronic annotation	---	---	IPR002085 // Zinc-containing alcohol dehydrogenase superfamily // 5.0E-25 /// IPR002085 // Zinc-containing alcohol dehydrogenase superfamily // 5.0E-25
11914	153113_at	1.29067	2.70743	14.4656	1.90201e-15	1.39514e-13	25.1655	FBgn0036318	CG11009	CG11009	CG11009	39460	---	---	---	IPR004182 // GRAM domain // 3.1E-15
6704	147903_at	1.29039	1.92649	14.3641	2.30744e-15	1.65781e-13	24.9708	FBgn0035089	CG9358	Phk-3	Pherokine 3	37997	4672 // protein kinase activity // non-traceable author statement /// 4674 // protein serine/threonine kinase activity // inferred from sequence or structural similarity /// 4674 // protein serine/threonine kinase activity // non-traceable author statement /// 5386 // carrier activity // inferred from electronic annotation /// 19992 // diacylglycerol binding // inferred from sequence or structura…	6468 // protein amino acid phosphorylation // non-traceable author statement /// 7165 // signal transduction // inferred from mutant phenotype /// 7265 // Ras protein signal transduction // traceable author statement /// 7283 // spermatogenesis // inferred from mutant phenotype /// 7362 // terminal region determination // inferred from mutant phenotype /// 7362 // terminal region determination //…	5737 // cytoplasm // traceable author statement /// 19897 // extrinsic to plasma membrane // traceable author statement	IPR005055 // Insect pheromone-binding family A10/OS-D // 2.8E-77
6245	147444_at	1.11874	1.23996	14.3316	2.4549e-15	1.73703e-13	24.9084	FBgn0034356	CG10924	CG10924	CG10924	37130	4613 // phosphoenolpyruvate carboxykinase (GTP) activity // inferred from sequence or structural similarity /// 5215 // transporter activity // inferred from electronic annotation /// 5525 // GTP binding // inferred from electronic annotation /// 5515 // protein binding // inferred from physical interaction /// 4611 // phosphoenolpyruvate carboxykinase activity // inferred from electronic annotat…	6094 // gluconeogenesis // inferred from sequence or structural similarity /// 6810 // transport // inferred from electronic annotation /// 6094 // gluconeogenesis // inferred from electronic annotation /// 6094 // gluconeogenesis // inferred from sequence similarity	5739 // mitochondrion // inferred from sequence or structural similarity /// 5739 // mitochondrion // inferred from sequence similarity	IPR008209 // Phosphoenolpyruvate carboxykinase (GTP) // 1.0E-126
5512	146711_at	0.991222	1.68561	14.3224	2.49862e-15	1.75051e-13	24.8906	FBgn0033129	CG12844	Tsp42Eh	Tetraspanin 42Eh	35617	---	---	16021 // integral to membrane // inferred from sequence or structural similarity /// 16021 // integral to membrane // inferred from electronic annotation /// 16021 // integral to membrane // inferred from sequence similarity	IPR000301 // CD9/CD37/CD63 antigen // 3.3E-17 /// IPR000301 // CD9/CD37/CD63 antigen // 4.6E-24
12121	153320_at	1.67182	1.51504	14.3223	2.49894e-15	1.75051e-13	24.8905	FBgn0039260	CG6369	Smg6	Smg6	42994	5488 // binding // inferred from electronic annotation	184 // mRNA catabolism, nonsense-mediated decay // inferred from mutant phenotype	---	---
2469	143668_at	1.04892	1.70838	14.255	2.84303e-15	1.97183e-13	24.7604	FBgn0011638	CG10922	La	La autoantigen-like	35305	3718 // RNA polymerase III transcription termination factor activity // inferred from sequence or structural similarity /// 3718 // RNA polymerase III transcription termination factor activity // non-traceable author statement /// 3729 // mRNA binding // inferred from sequence or structural similarity /// 3729 // mRNA binding // non-traceable author statement /// 8098 // 5S rRNA primary transcrip…	6396 // RNA processing // inferred from electronic annotation /// 6399 // tRNA metabolism // inferred from electronic annotation /// 6405 // RNA export from nucleus // inferred from electronic annotation	5634 // nucleus // non-traceable author statement /// 5737 // cytoplasm // inferred from electronic annotation /// 30529 // ribonucleoprotein complex // inferred from electronic annotation /// 5634 // nucleus // inferred from electronic annotation	IPR000504 // RNA-binding region RNP-1 (RNA recognition motif) // 2.7E-11 /// IPR006630 // RNA-binding protein Lupus Lal // 8.0E-35
9354	150553_at	0.875201	1.62614	14.2491	2.87553e-15	1.98454e-13	24.749	FBgn0039281	CG11847	CG11847	CG11847	43018	---	16032 // viral life cycle // inferred from electronic annotation	---	IPR008532 // Protein of unknown function DUF814 // 2.7E-53
3453	144652_at	1.75313	1.75905	14.2276	2.99672e-15	2.04801e-13	24.7074	FBgn0029952	CG12689	CG12689	CG12689	31676	---	---	---	---
5996	147195_at	2.88808	0.570024	14.1109	3.753e-15	2.54164e-13	24.4805	FBgn0033926	CG12505	CG12505	CG12505	36595	5515 // protein binding // inferred from physical interaction /// 3676 // nucleic acid binding // inferred from electronic annotation /// 8270 // zinc ion binding // inferred from electronic annotation	---	---	IPR005162 // Retrotransposon gag protein // 5.1E-18
13702	154901_at	0.704095	2.09219	13.9281	5.3536e-15	3.52131e-13	24.1223	FBgn0036197	CG7319	CG7319	CG7319	39320	179 // rRNA (adenine-N6,N6-)-dimethyltransferase activity // inferred from electronic annotation /// 3676 // nucleic acid binding // inferred from electronic annotation /// 16433 // rRNA (adenine) methyltransferase activity // inferred from sequence or structural similarity /// 8649 // rRNA methyltransferase activity // inferred from electronic annotation /// 8757 // S-adenosylmethionine-dependen…	154 // rRNA modification // inferred from electronic annotation /// 16072 // rRNA metabolism // inferred from electronic annotation /// 6364 // rRNA processing // inferred from electronic annotation	---	IPR001737 // Ribosomal RNA adenine dimethylase // 1.2E-29 /// IPR001737 // Ribosomal RNA adenine dimethylase // 1.2E-29
1035	142234_at	1.31379	0.932627	13.923	5.4071e-15	3.53029e-13	24.1123	FBgn0034915	CG17611	eIF6	eIF6	37776	3743 // translation initiation factor activity // inferred from sequence or structural similarity /// 3743 // translation initiation factor activity // inferred from electronic annotation /// 3743 // translation initiation factor activity // inferred from sequence similarity	6412 // protein biosynthesis // non-traceable author statement /// 6413 // translational initiation // inferred from sequence or structural similarity /// 6412 // protein biosynthesis // inferred from electronic annotation /// 6413 // translational initiation // inferred from electronic annotation /// 6413 // translational initiation // inferred from sequence similarity	5829 // cytosol // inferred from sequence or structural similarity /// 5829 // cytosol // non-traceable author statement /// 5634 // nucleus // inferred from electronic annotation /// 5829 // cytosol // inferred from sequence similarity	IPR002769 // Translation initiation factor IF6 // 1.0E-126
10790	151989_at	2.10621	4.18804	13.8034	6.83408e-15	4.27435e-13	23.8761	FBgn0031645	CG3036	CG3036	CG3036	33695	5436 // sodium:phosphate symporter activity // inferred from sequence or structural similarity /// 5215 // transporter activity // inferred from electronic annotation /// 5436 // sodium:phosphate symporter activity // inferred from sequence similarity	5975 // carbohydrate metabolism // inferred from electronic annotation /// 6796 // phosphate metabolism // inferred from electronic annotation /// 6812 // cation transport // inferred from electronic annotation /// 6817 // phosphate transport // inferred from sequence or structural similarity /// 6858 // extracellular transport // inferred from electronic annotation /// 8643 // carbohydrate trans…	16021 // integral to membrane // inferred from sequence or structural similarity /// 16020 // membrane // inferred from electronic annotation /// 16021 // integral to membrane // inferred from electronic annotation /// 16021 // integral to membrane // inferred from sequence similarity	---
11356	152555_at	1.38467	2.63268	13.7917	6.99375e-15	4.35477e-13	23.8528	FBgn0003149	CG5939	Prm	Paramyosin	39002	3774 // motor activity // non-traceable author statement /// 5200 // structural constituent of cytoskeleton // inferred from electronic annotation /// 8092 // cytoskeletal protein binding // inferred from electronic annotation /// 8307 // structural constituent of muscle // inferred from sequence or structural similarity /// 8307 // structural constituent of muscle // non-traceable author stateme…	7498 // mesoderm development // inferred from expression pattern /// 6941 // striated muscle contraction // inferred from electronic annotation	5863 // striated muscle thick filament // non-traceable author statement /// 16459 // myosin // inferred from electronic annotation /// 5863 // striated muscle thick filament // inferred from electronic annotation	IPR002928 // Myosin tail // 1.0E-126 /// IPR002928 // Myosin tail // 1.0E-126
13741	154940_at	1.26325	1.1357	13.7255	7.96703e-15	4.93885e-13	23.7213	FBgn0036487	CG6876	CG6876	CG6876	39655	31202 // RNA splicing factor activity, transesterification mechanism // inferred from sequence or structural similarity /// 31202 // RNA splicing factor activity, transesterification mechanism // inferred from sequence similarity	398 // nuclear mRNA splicing, via spliceosome // inferred from sequence or structural similarity /// 398 // nuclear mRNA splicing, via spliceosome // inferred from sequence similarity	5681 // spliceosome complex // inferred from sequence or structural similarity /// 5681 // spliceosome complex // inferred from sequence similarity	IPR002687 // Pre-mRNA processing ribonucleoprotein, binding region // 1.8E-58
3406	144605_at	1.10669	0.548375	13.6987	8.40097e-15	5.16218e-13	23.6678	FBgn0029885	CG3224	CG3224	CG3224	31600	5515 // protein binding // inferred from physical interaction /// 3676 // nucleic acid binding // inferred from electronic annotation /// 8270 // zinc ion binding // inferred from electronic annotation /// 46872 // metal ion binding // inferred from electronic annotation	---	5634 // nucleus // inferred from electronic annotation	---
12485	153684_at	1.33016	2.86762	13.6797	8.72128e-15	5.2894e-13	23.6301	FBgn0000250	CG5848	cact	cactus	34969	5515 // protein binding // inferred from physical interaction /// 8134 // transcription factor binding // traceable author statement /// 30528 // transcription regulator activity // inferred from electronic annotation	6357 // regulation of transcription from RNA polymerase II promoter // inferred from electronic annotation /// 6916 // anti-apoptosis // inferred from electronic annotation /// 6952 // defense response // non-traceable author statement /// 6952 // defense response // traceable author statement /// 6955 // immune response // traceable author statement /// 6960 // antimicrobial humoral response (se…	5737 // cytoplasm // inferred from direct assay /// 5737 // cytoplasm // non-traceable author statement /// 5737 // cytoplasm // traceable author statement	IPR002110 // Ankyrin // 2.2E-9 /// IPR002110 // Ankyrin // 1.3E-6 /// IPR002110 // Ankyrin // 6.3E-4 /// IPR002110 // Ankyrin // 3.6E-8 /// IPR002110 // Ankyrin // 2.6E-5
12307	153506_at	0.770327	1.94454	13.6424	9.38953e-15	5.67014e-13	23.5556	FBgn0022029	CG4798	l(2)k01209	lethal (2) k01209	36953	4849 // uridine kinase activity // inferred from sequence or structural similarity /// 5524 // ATP binding // inferred from electronic annotation /// 16757 // transferase activity, transferring glycosyl groups // inferred from electronic annotation /// 19201 // nucleotide kinase activity // inferred from electronic annotation /// 166 // nucleotide binding // inferred from electronic annotation //…	6206 // pyrimidine base metabolism // inferred from electronic annotation /// 9058 // biosynthesis // inferred from electronic annotation	---	IPR006083 // Phosphoribulokinase/uridine kinase // 4.6E-77 /// IPR006083 // Phosphoribulokinase/uridine kinase // 4.6E-77
11029	152228_at	1.36336	3.23782	13.6336	9.55515e-15	5.74539e-13	23.5379	FBgn0021872	CG9415	Xbp1	X box binding protein-1	44226	3700 // transcription factor activity // inferred from sequence or structural similarity /// 42803 // protein homodimerization activity // inferred from sequence or structural similarity /// 3677 // DNA binding // inferred from electronic annotation /// 43565 // sequence-specific DNA binding // inferred from electronic annotation /// 46983 // protein dimerization activity // inferred from electro…	6355 // regulation of transcription, DNA-dependent // inferred from electronic annotation /// 45449 // regulation of transcription // inferred from sequence or structural similarity /// 45449 // regulation of transcription // inferred from sequence similarity	5634 // nucleus // inferred from sequence or structural similarity /// 5634 // nucleus // inferred from electronic annotation /// 5634 // nucleus // inferred from sequence similarity	IPR004827 // Basic-leucine zipper (bZIP) transcription factor // 5.2E-8
12556	153755_at	1.20333	2.3435	13.5733	1.0771e-14	6.39412e-13	23.4171	FBgn0030850	CG8408	CG8408	CG8408	32737	---	---	---	---
5513	146712_at	1.43373	2.00313	13.5139	1.21248e-14	7.10745e-13	23.2976	FBgn0033130	CG12843	Tsp42Ei	Tetraspanin 42Ei	35618	---	---	16021 // integral to membrane // inferred from sequence or structural similarity /// 16021 // integral to membrane // inferred from electronic annotation /// 16021 // integral to membrane // inferred from sequence similarity	IPR000301 // CD9/CD37/CD63 antigen // 3.6E-48
4229	145428_at	1.23277	0.799561	13.501	1.24414e-14	7.23255e-13	23.2716	FBgn0031115	CG11710	CG11710	CG11710	33044	3712 // transcription cofactor activity // inferred from electronic annotation /// 16922 // ligand-dependent nuclear receptor binding // inferred from sequence or structural similarity /// 5515 // protein binding // inferred from physical interaction /// 8270 // zinc ion binding // inferred from electronic annotation /// 30528 // transcription regulator activity // inferred from electronic annota…	6357 // regulation of transcription from RNA polymerase II promoter // inferred from electronic annotation /// 45449 // regulation of transcription // inferred from electronic annotation	5634 // nucleus // inferred from electronic annotation	IPR009349 // Putative zinc finger, C2HC5-type // 4.5E-36
13945	155144_at	1.43467	3.79262	13.5021	1.24137e-14	7.23255e-13	23.2739	FBgn0041342	CG1049	Cct1	CTP:phosphocholine cytidylyltransferase 1	117353	4105 // choline-phosphate cytidylyltransferase activity // inferred from sequence or structural similarity /// 16779 // nucleotidyltransferase activity // inferred from electronic annotation /// 4105 // choline-phosphate cytidylyltransferase activity // inferred from sequence similarity	1654 // eye development // inferred from mutant phenotype /// 6644 // phospholipid metabolism // inferred from electronic annotation /// 6897 // endocytosis // inferred from mutant phenotype /// 7476 // wing morphogenesis // inferred from mutant phenotype /// 8340 // determination of adult life span // inferred from mutant phenotype /// 9058 // biosynthesis // inferred from electronic annotation …	---	IPR004820 // Cytidylyltransferase // 4.5E-30
2585	143784_at	1.1656	5.45138	13.4749	1.31083e-14	7.58871e-13	23.2189	FBgn0015221	CG1469	Fer2LCH	Ferritin 2 light chain homologue	44965	8198 // ferrous iron binding // inferred from direct assay /// 8199 // ferric iron binding // inferred from electronic annotation	6879 // iron ion homeostasis // inferred from direct assay /// 6879 // iron ion homeostasis // inferred from electronic annotation	8043 // ferritin complex // inferred from direct assay	---
13459	154658_at	1.03764	1.28214	13.4545	1.36522e-14	7.83882e-13	23.1779	FBgn0031050	CG12235	Arp11	Arp11	32969	3779 // actin binding // inferred from sequence or structural similarity /// 5200 // structural constituent of cytoskeleton // inferred from sequence or structural similarity /// 5515 // protein binding // inferred from physical interaction /// 5515 // protein binding // inferred from electronic annotation /// 3779 // actin binding // inferred from sequence similarity /// 5200 // structural const…	7010 // cytoskeleton organization and biogenesis // inferred from sequence or structural similarity /// 7010 // cytoskeleton organization and biogenesis // inferred from sequence similarity	5884 // actin filament // inferred from sequence or structural similarity /// 5884 // actin filament // inferred from sequence similarity	IPR004000 // Actin/actin-like // 1.0E-14
12755	153954_at	1.01138	2.72082	13.3831	1.57564e-14	8.82989e-13	23.0332	FBgn0027865	CG6120	Tsp96F	Tetraspanin 96F	43127	5102 // receptor binding // inferred from electronic annotation	7165 // signal transduction // inferred from electronic annotation /// 16337 // cell-cell adhesion // inferred from electronic annotation /// 19724 // B cell mediated immunity // inferred from electronic annotation	16021 // integral to membrane // inferred from sequence or structural similarity /// 16021 // integral to membrane // inferred from electronic annotation /// 16021 // integral to membrane // inferred from sequence similarity	IPR000301 // CD9/CD37/CD63 antigen // 2.5E-79
11995	153194_at	1.05954	1.08271	13.3789	1.58898e-14	8.86917e-13	23.0247	FBgn0032906	CG9273	CG9273	CG9273	35364	3677 // DNA binding // inferred from sequence or structural similarity /// 3697 // single-stranded DNA binding // inferred from electronic annotation /// 5515 // protein binding // inferred from physical interaction /// 3676 // nucleic acid binding // inferred from electronic annotation /// 3677 // DNA binding // inferred from sequence similarity	6261 // DNA-dependent DNA replication // inferred from sequence or structural similarity /// 6281 // DNA repair // inferred from electronic annotation /// 6310 // DNA recombination // inferred from electronic annotation /// 6261 // DNA-dependent DNA replication // inferred from sequence similarity	5662 // DNA replication factor A complex // inferred from sequence or structural similarity /// 5662 // DNA replication factor A complex // inferred from sequence similarity	IPR004365 // OB-fold nucleic acid binding domain // 1.1E-7
9321	150520_at	1.23605	2.31934	13.2995	1.8644e-14	1.03652e-12	22.8634	FBgn0039218	CG13628	Rpb10	Rpb10	42942	3676 // nucleic acid binding // inferred from electronic annotation /// 3899 // DNA-directed RNA polymerase activity // inferred from sequence or structural similarity /// 5515 // protein binding // inferred from physical interaction /// 3677 // DNA binding // inferred from electronic annotation /// 3899 // DNA-directed RNA polymerase activity // inferred from electronic annotation /// 8270 // zi…	6350 // transcription // inferred from sequence or structural similarity /// 6366 // transcription from RNA polymerase II promoter // inferred from sequence or structural similarity /// 6350 // transcription // inferred from electronic annotation /// 45449 // regulation of transcription // inferred from electronic annotation /// 6350 // transcription // inferred from sequence similarity /// 6366 …	5634 // nucleus // inferred from sequence or structural similarity /// 5665 // DNA-directed RNA polymerase II, core complex // inferred from sequence or structural similarity /// 5634 // nucleus // inferred from electronic annotation /// 5634 // nucleus // inferred from sequence similarity /// 5665 // DNA-directed RNA polymerase II, core complex // inferred from sequence similarity	IPR000268 // RNA polymerases N/8 Kd subunits // 4.9E-36
13644	154843_at	1.41032	2.59885	13.2636	2.00485e-14	1.10582e-12	22.7901	FBgn0035850	CG7986	Atg18	Autophagy-specific gene 18	38913	---	6914 // autophagy // inferred from mutant phenotype	---	---
11629	152828_at	0.779159	1.22776	13.0976	2.80857e-14	1.53105e-12	22.4497	FBgn0031039 /// FBgn0031038	CG14209 /// CG14208	Shawn /// Tyler	Shawn /// Tyler	3772349 /// 3772641	5386 // carrier activity // inferred from sequence or structural similarity /// 5488 // binding // inferred from electronic annotation /// 5215 // transporter activity // inferred from electronic annotation	6810 // transport // inferred from sequence or structural similarity /// 6810 // transport // inferred from electronic annotation	5740 // mitochondrial envelope // inferred from sequence or structural similarity /// 16021 // integral to membrane // inferred from sequence or structural similarity /// 5743 // mitochondrial inner membrane // inferred from sequence or structural similarity /// 5743 // mitochondrial inner membrane // inferred from electronic annotation /// 16020 // membrane // inferred from electronic annotation…	---
6909	148108_at	0.817532	1.91126	13.0862	2.87448e-14	1.56091e-12	22.4263	FBgn0035444	CG12012	CG12012	CG12012	38422	---	---	---	---
11457	152656_at	1.31119	3.90505	13.0741	2.94655e-14	1.59387e-12	22.4013	FBgn0020304	CG3365	drongo	drongo	33263	5215 // transporter activity // inferred from electronic annotation	6139 // nucleobase, nucleoside, nucleotide and nucleic acid metabolism // inferred from electronic annotation /// 6810 // transport // inferred from electronic annotation /// 15931 // nucleobase, nucleoside, nucleotide and nucleic acid transport // inferred from electronic annotation /// 43087 // regulation of GTPase activity // inferred from electronic annotation	---	IPR001164 // Human Rev interacting-like protein (hRIP) // 2.5E-28
12361	153560_at	1.16332	5.7645	12.9592	3.72874e-14	1.97877e-12	22.1636	FBgn0052672	CG32672	Atg8a	Autophagy-specific gene 8a	32001	5200 // structural constituent of cytoskeleton // inferred from electronic annotation /// 8017 // microtubule binding // inferred from electronic annotation /// 5515 // protein binding // inferred from physical interaction	7010 // cytoskeleton organization and biogenesis // inferred from electronic annotation	---	IPR004241 // Light chain 3 (LC3) // 5.1E-81
11026	152225_at	1.64057	2.67932	12.9313	3.94902e-14	2.07992e-12	22.1056	FBgn0020545	CG3943	kraken	kraken	33265	17171 // serine hydrolase activity // non-traceable author statement /// 3824 // catalytic activity // inferred from electronic annotation /// 4759 // serine esterase activity // inferred from electronic annotation /// 16787 // hydrolase activity // inferred from electronic annotation	6725 // aromatic compound metabolism // inferred from electronic annotation /// 7586 // digestion // inferred from expression pattern /// 9636 // response to toxin // inferred from expression pattern /// 6805 // xenobiotic metabolism // inferred from electronic annotation /// 7275 // development // inferred from electronic annotation /// 7586 // digestion // inferred from electronic annotation //…	---	---
2587	143786_at	1.22288	2.01803	12.8791	4.39746e-14	2.29027e-12	21.997	FBgn0015234	CG8522	HLH106	Helix loop helix protein 106	40155	3700 // transcription factor activity // inferred from sequence or structural similarity /// 3700 // transcription factor activity // non-traceable author statement /// 30528 // transcription regulator activity // inferred from electronic annotation /// 3700 // transcription factor activity // inferred from sequence similarity	6366 // transcription from RNA polymerase II promoter // inferred from electronic annotation /// 6629 // lipid metabolism // inferred from electronic annotation /// 6633 // fatty acid biosynthesis // non-traceable author statement /// 42304 // regulation of fatty acid biosynthesis // traceable author statement /// 45941 // positive regulation of transcription // traceable author statement /// 727…	5634 // nucleus // inferred from sequence or structural similarity /// 5634 // nucleus // non-traceable author statement /// 5634 // nucleus // traceable author statement /// 5634 // nucleus // inferred from electronic annotation /// 5634 // nucleus // inferred from sequence similarity	IPR001092 // Basic helix-loop-helix dimerization domain bHLH // 1.9E-14
2428	143627_at	1.14361	2.94399	12.8633	4.54378e-14	2.34902e-12	21.9639	FBgn0010434	CG11949	cora	coracle	37205	3779 // actin binding // inferred from electronic annotation /// 5200 // structural constituent of cytoskeleton // inferred from electronic annotation /// 8092 // cytoskeletal protein binding // inferred from sequence or structural similarity /// 5515 // protein binding // inferred from physical interaction /// 5198 // structural molecule activity // inferred from electronic annotation /// 5488 /…	6612 // protein targeting to membrane // traceable author statement /// 7010 // cytoskeleton organization and biogenesis // inferred from sequence or structural similarity /// 7163 // establishment and/or maintenance of cell polarity // non-traceable author statement /// 7391 // dorsal closure // non-traceable author statement /// 7391 // dorsal closure // traceable author statement /// 7435 // s…	5856 // cytoskeleton // inferred from sequence or structural similarity /// 5918 // septate junction // inferred from direct assay /// 5918 // septate junction // non-traceable author statement /// 5918 // septate junction // traceable author statement /// 16327 // apicolateral plasma membrane // non-traceable author statement /// 45169 // fusome // inferred from direct assay /// 45170 // spectro…	IPR000299 // Band 4.1 // 2.6E-75 /// IPR008379 // 4.1, C-terminal // 5.5E-38 /// IPR008379 // 4.1, C-terminal // 5.5E-38 /// IPR008379 // 4.1, C-terminal // 5.5E-38 /// IPR008379 // 4.1, C-terminal // 5.5E-38
12304	153503_at	0.871591	2.99368	12.839	4.77774e-14	2.46089e-12	21.9132	FBgn0034654	CG10306	CG10306	CG10306	37475	3743 // translation initiation factor activity // inferred from sequence or structural similarity /// 5515 // protein binding // inferred from physical interaction /// 3743 // translation initiation factor activity // inferred from electronic annotation /// 3743 // translation initiation factor activity // inferred from sequence similarity	6413 // translational initiation // inferred from sequence or structural similarity /// 6412 // protein biosynthesis // inferred from electronic annotation /// 6413 // translational initiation // inferred from electronic annotation /// 6413 // translational initiation // inferred from sequence similarity	5634 // nucleus // inferred from electronic annotation /// 5852 // eukaryotic translation initiation factor 3 complex // inferred from sequence or structural similarity /// 5852 // eukaryotic translation initiation factor 3 complex // inferred from sequence similarity	IPR009374 // Eukaryotic translation initiation factor 3 subunit 11 // 1.0E-126
11811	153010_at	0.890145	2.37641	12.8044	5.13265e-14	2.61485e-12	21.8408	FBgn0036805 /// FBgn0068178	CG4108	Chmp1 /// DyakChmp1	Chmp1 /// Chmp1	40036	---	---	---	IPR005024 // Snf7 // 8.0E-62
11021	152220_at	1.13476	0.897503	12.7928	5.25728e-14	2.66864e-12	21.8166	FBgn0034517	CG18066	CG18066	CG18066	37319	5515 // protein binding // inferred from physical interaction /// 42302 // structural constituent of cuticle // inferred from electronic annotation	---	---	IPR000618 // Insect cuticle protein // 1.6E-17
12235	153434_at	1.2575	3.6519	12.7827	5.36857e-14	2.69583e-12	21.7954	FBgn0001208	CG7399	Hn	Henna	38871	4505 // phenylalanine 4-monooxygenase activity // inferred from direct assay /// 4505 // phenylalanine 4-monooxygenase activity // inferred from mutant phenotype /// 4505 // phenylalanine 4-monooxygenase activity // inferred from sequence or structural similarity /// 4505 // phenylalanine 4-monooxygenase activity // non-traceable author statement /// 4510 // tryptophan 5-monooxygenase activity //…	6559 // L-phenylalanine catabolism // inferred from mutant phenotype /// 6559 // L-phenylalanine catabolism // non-traceable author statement /// 6726 // eye pigment biosynthesis // inferred from direct assay /// 7165 // signal transduction // inferred from electronic annotation /// 6559 // L-phenylalanine catabolism // inferred from electronic annotation /// 6587 // serotonin biosynthesis from t…	---	IPR001273 // Aromatic amino acid hydroxylase // 1.0E-126 /// IPR002912 // Amino acid-binding ACT // 1.4E-7 /// IPR001273 // Aromatic amino acid hydroxylase // 1.0E-126 /// IPR002912 // Amino acid-binding ACT // 1.4E-7 /// IPR001273 // Aromatic amino acid hydroxylase // 1.0E-126
5380	146579_at	0.991532	0.649418	12.7252	6.05041e-14	3.00589e-12	21.6747	FBgn0032934	CG8679	CG8679	CG8679	35395	---	---	5635 // nuclear envelope // inferred from electronic annotation	IPR003887 // Lamino-associated polypeptide 2/emerin // 2.7E-20 /// IPR002110 // Ankyrin // 27.0 /// IPR002110 // Ankyrin // 1.2E-7 /// IPR002110 // Ankyrin // 2.3
11382	152581_at	0.946728	2.44036	12.7089	6.25847e-14	3.09827e-12	21.6405	FBgn0028984	CG18525	Spn5	Serine protease inhibitor 5	49804	4867 // serine-type endopeptidase inhibitor activity // non-traceable author statement /// 5515 // protein binding // inferred from physical interaction /// 4867 // serine-type endopeptidase inhibitor activity // inferred from electronic annotation /// 8233 // peptidase activity // inferred from electronic annotation	6508 // proteolysis // inferred from electronic annotation	---	IPR000215 // Serpin // 2.1E-81
12599	153798_at	1.51095	2.77582	12.665	6.85929e-14	3.37082e-12	21.5479	FBgn0035715	CG10103	CG10103	CG10103	38750	3676 // nucleic acid binding // inferred from electronic annotation /// 4522 // pancreatic ribonuclease activity // inferred from electronic annotation /// 5515 // protein binding // inferred from physical interaction	---	---	IPR005061 // Eukaryotic protein of unknown function DUF292 // 1.7E-75
12899	154098_at	1.03298	1.39014	12.6194	7.54497e-14	3.65761e-12	21.4517	FBgn0003276	CG3180	RpII140	RNA polymerase II 140kD subunit	41721	3676 // nucleic acid binding // inferred from electronic annotation /// 3677 // DNA binding // inferred from electronic annotation /// 3899 // DNA-directed RNA polymerase activity // inferred from sequence or structural similarity /// 3899 // DNA-directed RNA polymerase activity // non-traceable author statement /// 3899 // DNA-directed RNA polymerase activity // inferred from electronic annotati…	6366 // transcription from RNA polymerase II promoter // inferred from sequence or structural similarity /// 6366 // transcription from RNA polymerase II promoter // non-traceable author statement /// 9299 // mRNA transcription // inferred from electronic annotation /// 6350 // transcription // inferred from electronic annotation /// 6366 // transcription from RNA polymerase II promoter // inferr…	5665 // DNA-directed RNA polymerase II, core complex // inferred from sequence or structural similarity /// 5665 // DNA-directed RNA polymerase II, core complex // non-traceable author statement /// 5634 // nucleus // inferred from electronic annotation /// 5665 // DNA-directed RNA polymerase II, core complex // inferred from sequence similarity	IPR007641 // RNA polymerase Rpb2, domain 7 // 3.3E-53 /// IPR007644 // RNA polymerase beta subunit // 4.6E-103 /// IPR007642 // RNA polymerase Rpb2, domain 2 // 4.1E-93 /// IPR007645 // RNA polymerase Rpb2, domain 3 // 4.1E-32 /// IPR007646 // RNA polymerase Rpb2, domain 4 // 1.1E-42 /// IPR007647 // RNA polymerase Rpb2, domain 5 // 1.3E-29 /// IPR007120 // RNA polymerase Rpb2, domain 6 // 1.0E-1…
10941	152140_at	1.45702	1.1118	12.5683	8.39768e-14	4.02916e-12	21.3435	FBgn0032935	CG8678	CG8678	CG8678	35396	---	---	5635 // nuclear envelope // inferred from electronic annotation	---
13844	155043_at	0.870442	0.946833	12.476	1.01985e-13	4.71556e-12	21.1472	FBgn0001179	CG8019	hay	haywire	39202	3676 // nucleic acid binding // inferred from electronic annotation /// 3677 // DNA binding // inferred from electronic annotation /// 4003 // ATP-dependent DNA helicase activity // non-traceable author statement /// 4386 // helicase activity // inferred from sequence or structural similarity /// 5524 // ATP binding // inferred from electronic annotation /// 16251 // general RNA polymerase II tra…	381 // regulation of alternative nuclear mRNA splicing, via spliceosome // inferred from mutant phenotype /// 6289 // nucleotide-excision repair // inferred from sequence or structural similarity /// 6367 // transcription initiation from RNA polymerase II promoter // inferred from sequence or structural similarity /// 6281 // DNA repair // inferred from electronic annotation /// 6289 // nucleotid…	5634 // nucleus // Unknown /// 5634 // nucleus // non-traceable author statement /// 5675 // transcription factor TFIIH complex // inferred from sequence or structural similarity /// 5634 // nucleus // inferred from electronic annotation /// 5634 // nucleus // inferred from curator /// 5675 // transcription factor TFIIH complex // inferred from sequence similarity	IPR001650 // Helicase, C-terminal // 1.2E-12
5360	146559_at	1.10373	4.53868	12.4025	1.19144e-13	5.45495e-12	20.99	FBgn0032897	CG9336	CG9336	CG9336	35355	---	---	---	---
5362	146561_at	1.04071	2.13922	12.3933	1.21478e-13	5.54367e-12	20.9704	FBgn0032900	CG14401	CG14401	CG14401	35358	---	---	---	---
3138	144337_at	0.681589	-0.28811	12.38	1.24965e-13	5.68428e-12	20.9419	FBgn0029504	CG12690	CHES-1-like	Checkpoint suppressor homologue	31678	3700 // transcription factor activity // inferred from sequence or structural similarity /// 3700 // transcription factor activity // inferred from electronic annotation /// 43565 // sequence-specific DNA binding // inferred from electronic annotation /// 3700 // transcription factor activity // inferred from sequence similarity	74 // regulation of progression through cell cycle // inferred from electronic annotation /// 6355 // regulation of transcription, DNA-dependent // inferred from electronic annotation /// 6355 // regulation of transcription, DNA-dependent // inferred from sequence or structural similarity /// 6366 // transcription from RNA polymerase II promoter // inferred from electronic annotation /// 6355 // …	5634 // nucleus // inferred from sequence or structural similarity /// 5634 // nucleus // inferred from electronic annotation /// 5634 // nucleus // inferred from sequence similarity	---
2599	143798_at	0.762042	0.102538	12.3119	1.44405e-13	6.48435e-12	20.7957	FBgn0043005	CG10251	CG10251	CG10251	117368	5276 // hydrogen:vesicular amine antiporter activity // inferred from sequence or structural similarity /// 5276 // hydrogen:vesicular amine antiporter activity // inferred from sequence similarity	6810 // transport // inferred from electronic annotation /// 19226 // transmission of nerve impulse // inferred from electronic annotation	16021 // integral to membrane // inferred from electronic annotation	---
13941	155140_at	0.729167	2.97547	12.3099	1.45022e-13	6.49124e-12	20.7914	FBgn0029133	CG1591	REG	REG	32274	8538 // proteasome activator activity // inferred from sequence or structural similarity /// 5515 // protein binding // inferred from physical interaction /// 8538 // proteasome activator activity // inferred from electronic annotation /// 8538 // proteasome activator activity // inferred from sequence similarity	6508 // proteolysis // inferred from electronic annotation	502 // proteasome complex (sensu Eukaryota) // inferred from sequence or structural similarity /// 5634 // nucleus // inferred from direct assay /// 5730 // nucleolus // inferred from direct assay /// 8537 // proteasome activator complex // inferred from electronic annotation /// 5829 // cytosol // inferred from electronic annotation /// 43234 // protein complex // inferred from electronic annota…	IPR003186 // Proteasome activator pa28, beta subunit // 1.9E-93 /// IPR003185 // Proteasome activator pa28, alpha subunit // 6.3E-10
4805	146004_at	1.65113	2.71836	12.2691	1.58187e-13	7.01331e-12	20.7036	FBgn0031977	CG7380	CG7380	CG7380	34095	3677 // DNA binding // non-traceable author statement /// 5515 // protein binding // inferred from physical interaction /// 3677 // DNA binding // inferred from electronic annotation	---	5634 // nucleus // non-traceable author statement /// 5634 // nucleus // inferred from electronic annotation	IPR004122 // Barrier to autointegration factor, BAF // 5.1E-90
13627	154826_at	1.0105	2.52966	12.2254	1.73669e-13	7.62727e-12	20.6093	FBgn0032940	CG18362	Mio	Mlx interactor	35402	3700 // transcription factor activity // inferred from sequence or structural similarity /// 3700 // transcription factor activity // non-traceable author statement /// 5515 // protein binding // inferred from physical interaction /// 30528 // transcription regulator activity // inferred from electronic annotation /// 3700 // transcription factor activity // inferred from sequence similarity	45449 // regulation of transcription // inferred from sequence or structural similarity /// 7275 // development // inferred from electronic annotation /// 30154 // cell differentiation // inferred from electronic annotation /// 45449 // regulation of transcription // inferred from electronic annotation /// 45449 // regulation of transcription // inferred from sequence similarity	5634 // nucleus // inferred from sequence or structural similarity /// 5634 // nucleus // inferred from electronic annotation /// 5634 // nucleus // inferred from sequence similarity	IPR001092 // Basic helix-loop-helix dimerization domain bHLH // 2.1E-16 /// IPR001092 // Basic helix-loop-helix dimerization domain bHLH // 2.1E-16 /// IPR001092 // Basic helix-loop-helix dimerization domain bHLH // 2.1E-16 /// IPR001092 // Basic helix-loop-helix dimerization domain bHLH // 2.1E-16
10364	151563_at	1.96626	2.09815	12.1953	1.85245e-13	8.08498e-12	20.544	---	---	---	---	---	4812 // aminoacyl-tRNA ligase activity // inferred from electronic annotation /// 5524 // ATP binding // inferred from electronic annotation /// 46872 // metal ion binding // inferred from electronic annotation /// 8270 // zinc ion binding // inferred from electronic annotation	6418 // tRNA aminoacylation for protein translation // inferred from electronic annotation	---	---
8595	149794_at	1.48165	4.21484	12.1377	2.09585e-13	8.97947e-12	20.4193	FBgn0038074	CG6188	CG6188	CG6188	41561	17174 // glycine N-methyltransferase activity // inferred from sequence or structural similarity /// 8168 // methyltransferase activity // inferred from electronic annotation /// 8757 // S-adenosylmethionine-dependent methyltransferase activity // inferred from electronic annotation /// 16740 // transferase activity // inferred from electronic annotation /// 17174 // glycine N-methyltransferase a…	8652 // amino acid biosynthesis // inferred from electronic annotation	---	---
1502	142701_at	0.888696	0.248363	12.0975	2.28549e-13	9.66867e-12	20.3317	FBgn0030006	CG17982	CG17982	CG17982	31739	---	---	---	---
13470	154669_at	1.33651	2.67351	12.0348	2.61641e-13	1.08449e-11	20.195	FBgn0031313	CG5080	CG5080	CG5080	33299	---	---	---	---
5312	146511_at	0.537632	0.212405	12.0068	2.77942e-13	1.13655e-11	20.1339	FBgn0032819	CG10463	CG10463	CG10463	35264	16491 // oxidoreductase activity // inferred from electronic annotation /// 50660 // FAD binding // inferred from electronic annotation	8033 // tRNA processing // inferred from electronic annotation	---	IPR001269 // Protein of unknown function UPF0034 // 1.3E-54
13067	154266_at	0.914738	2.03901	12.0063	2.78255e-13	1.13655e-11	20.1328	FBgn0037555	CG9638	Ada2b	Ada2b	40966	3677 // DNA binding // inferred from electronic annotation /// 4402 // histone acetyltransferase activity // non-traceable author statement /// 8270 // zinc ion binding // inferred from electronic annotation /// 19239 // deaminase activity // inferred from electronic annotation /// 30528 // transcription regulator activity // inferred from electronic annotation /// 5515 // protein binding // infe…	6357 // regulation of transcription from RNA polymerase II promoter // inferred from electronic annotation /// 35066 // positive regulation of histone acetylation // inferred from mutant phenotype /// 45449 // regulation of transcription // inferred from electronic annotation	124 // SAGA complex // inferred from physical interaction /// 124 // SAGA complex // non-traceable author statement /// 5700 // polytene chromosome // inferred from direct assay /// 5634 // nucleus // inferred from electronic annotation	IPR000433 // Zn-finger, ZZ type // 2.2E-8 /// IPR001005 // Myb DNA-binding domain // 1.6E-8
502	141701_at	1.46399	1.69764	12.0021	2.80781e-13	1.14353e-11	20.1237	FBgn0033205	CG2064	CG2064	CG2064	35708	16491 // oxidoreductase activity // inferred from electronic annotation	8152 // metabolism // inferred from electronic annotation	---	IPR002198 // Short-chain dehydrogenase/reductase SDR // 1.2E-36
8221	149420_at	0.950227	2.55364	11.9886	2.89104e-13	1.17021e-11	20.0941	FBgn0037468	CG1943	CG1943	CG1943	40844	5515 // protein binding // inferred from physical interaction	---	---	---
13122	154321_at	1.52669	5.58662	11.9861	2.90673e-13	1.17021e-11	20.0887	FBgn0015222	CG2216	Fer1HCH	Ferritin 1 heavy chain homologue	46415	8198 // ferrous iron binding // inferred from direct assay /// 8198 // ferrous iron binding // inferred from sequence or structural similarity /// 8198 // ferrous iron binding // non-traceable author statement /// 8199 // ferric iron binding // inferred from electronic annotation /// 5515 // protein binding // inferred from physical interaction /// 5488 // binding // inferred from electronic anno…	6826 // iron ion transport // inferred from electronic annotation /// 6879 // iron ion homeostasis // inferred from direct assay /// 6879 // iron ion homeostasis // inferred from sequence or structural similarity /// 6879 // iron ion homeostasis // non-traceable author statement /// 6879 // iron ion homeostasis // inferred from electronic annotation /// 6879 // iron ion homeostasis // inferred fr…	8043 // ferritin complex // inferred from direct assay /// 8043 // ferritin complex // inferred from sequence or structural similarity /// 8043 // ferritin complex // non-traceable author statement /// 8043 // ferritin complex // inferred from sequence similarity	IPR008331 // Ferritin and Dps // 3.0E-47 /// IPR008331 // Ferritin and Dps // 3.1E-22
5979	147178_at	0.763714	2.46792	11.9224	3.33822e-13	1.3305e-11	19.9487	FBgn0033886	CG13349	CG13349	CG13349	36545	5515 // protein binding // inferred from physical interaction	7155 // cell adhesion // inferred from electronic annotation	16021 // integral to membrane // inferred from electronic annotation	IPR006773 // Adhesion regulating molecule // 1.0E-126
13422	154621_at	1.23975	3.86979	11.9217	3.34287e-13	1.3305e-11	19.9473	FBgn0027493	CG17273	CG17273	CG17273	42466	4019 // adenylosuccinate synthase activity // inferred from sequence or structural similarity /// 4019 // adenylosuccinate synthase activity // non-traceable author statement /// 5525 // GTP binding // inferred from electronic annotation /// 5515 // protein binding // inferred from physical interaction /// 166 // nucleotide binding // inferred from electronic annotation /// 287 // magnesium ion b…	6164 // purine nucleotide biosynthesis // non-traceable author statement /// 6164 // purine nucleotide biosynthesis // inferred from electronic annotation	---	IPR001114 // Adenylosuccinate synthetase // 1.0E-126
12859	154058_at	1.36674	2.51867	11.9093	3.43419e-13	1.36297e-11	19.9201	FBgn0036449	CG5295	CG5295	CG5295	39611	5515 // protein binding // inferred from physical interaction	6629 // lipid metabolism // inferred from electronic annotation	---	IPR002641 // Patatin // 4.6E-38
3657	144856_at	1.08008	3.12312	11.8917	3.56888e-13	1.40845e-11	19.8812	FBgn0030280	CG11106	CG11106	CG11106	32062	---	---	---	---
11284	152483_at	0.826959	5.13612	11.8706	3.73669e-13	1.46642e-11	19.8347	FBgn0035915	CG6372	CG6372	CG6372	38986	4178 // leucyl aminopeptidase activity // inferred from sequence or structural similarity /// 4177 // aminopeptidase activity // inferred from electronic annotation /// 4178 // leucyl aminopeptidase activity // inferred from sequence similarity	6508 // proteolysis // inferred from electronic annotation	5622 // intracellular // inferred from electronic annotation	IPR008283 // Peptidase M17, cytosol aminopeptidase, N-terminal // 7.1E-54 /// IPR000819 // Peptidase M17, cytosol aminopeptidase, C-terminal // 1.5E-93
3826	145025_at	0.894484	1.224	11.8174	4.19679e-13	1.6378e-11	19.7173	FBgn0030510	CG12177	CG12177	CG12177	32326	16787 // hydrolase activity // inferred from electronic annotation	6139 // nucleobase, nucleoside, nucleotide and nucleic acid metabolism // inferred from electronic annotation /// 6144 // purine base metabolism // inferred from electronic annotation /// 6206 // pyrimidine base metabolism // inferred from electronic annotation	---	IPR001910 // Inosine/uridine-preferring nucleoside hydrolase // 1.4E-42
6251	147450_at	1.52588	1.75223	11.8076	4.28812e-13	1.66417e-11	19.6956	FBgn0034364	CG5493	CG5493	CG5493	37139	17172 // cysteine dioxygenase activity // inferred from sequence or structural similarity /// 17172 // cysteine dioxygenase activity // inferred from sequence similarity	9063 // amino acid catabolism // inferred from electronic annotation	---	IPR010300 // Cysteine dioxygenase type I // 4.1E-118
11691	152890_at	1.04455	3.78132	11.7716	4.63928e-13	1.79053e-11	19.616	FBgn0038088	CG10126	CG10126	CG10126	41579	5509 // calcium ion binding // inferred from sequence or structural similarity /// 5515 // protein binding // inferred from physical interaction /// 5509 // calcium ion binding // inferred from electronic annotation /// 5509 // calcium ion binding // inferred from sequence similarity	---	---	IPR002048 // Calcium-binding EF-hand // 0.0019 /// IPR002048 // Calcium-binding EF-hand // 3.1E-5 /// IPR002048 // Calcium-binding EF-hand // 2.6E-5 /// IPR002048 // Calcium-binding EF-hand // 0.17 /// IPR002048 // Calcium-binding EF-hand // 0.0019 /// IPR002048 // Calcium-binding EF-hand // 3.1E-5 /// IPR002048 // Calcium-binding EF-hand // 2.6E-5 /// IPR002048 // Calcium-binding EF-hand // 0.17
10653	151852_at	0.851173	2.27682	11.7174	5.22517e-13	2.00561e-11	19.4958	FBgn0053111	CG33111	CG33111	CG33111	50068	3723 // RNA binding // inferred from electronic annotation	35071 // salivary gland cell autophagic cell death // inferred from expression pattern /// 48102 // autophagic cell death // inferred from expression pattern	---	---
13108	154307_at	0.932728	0.0994278	11.7002	5.42721e-13	2.07181e-11	19.4574	FBgn0031008	CG8010	CG8010	CG8010	32921	5515 // protein binding // inferred from physical interaction	---	---	---
6820	148019_at	0.739133	1.58556	11.6772	5.70943e-13	2.16773e-11	19.4061	FBgn0035300	CG1139	CG1139	CG1139	38264	5279 // amino acid-polyamine transporter activity // inferred from electronic annotation /// 15171 // amino acid transporter activity // inferred from sequence or structural similarity /// 15171 // amino acid transporter activity // inferred from sequence similarity	6520 // amino acid metabolism // inferred from electronic annotation /// 6865 // amino acid transport // inferred from electronic annotation	16020 // membrane // inferred from electronic annotation	IPR002422 // Amino acid/polyamine transporter II // 5.2E-59
10295	151494_at	1.35033	3.79887	11.6452	6.1268e-13	2.29598e-11	19.3348	---	---	---	---	---	---	---	---	---
13099	154298_at	0.646546	2.42975	11.6062	6.67718e-13	2.47479e-11	19.2478	FBgn0036980	CG5701	RhoBTB	RhoBTB	40249	3924 // GTPase activity // inferred from sequence or structural similarity /// 3924 // GTPase activity // non-traceable author statement /// 5515 // protein binding // inferred from electronic annotation /// 5525 // GTP binding // inferred from electronic annotation /// 5515 // protein binding // inferred from physical interaction /// 166 // nucleotide binding // inferred from electronic annotati…	7010 // cytoskeleton organization and biogenesis // inferred from electronic annotation /// 7186 // G-protein coupled receptor protein signaling pathway // inferred from electronic annotation /// 7264 // small GTPase mediated signal transduction // inferred from electronic annotation /// 15031 // protein transport // inferred from electronic annotation	16020 // membrane // inferred from electronic annotation	IPR001806 // Ras GTPase superfamily // 1.7E-22 /// IPR000210 // BTB/POZ domain // 2.5E-6 /// IPR000210 // BTB/POZ domain // 1.9E-5 /// IPR000210 // BTB/POZ domain // 2.3E-14
10854	152053_at	0.797521	3.58615	11.593	6.87643e-13	2.54192e-11	19.2181	FBgn0032156	CG13124	CG13124	CG13124	34310	5515 // protein binding // inferred from physical interaction /// 3723 // RNA binding // inferred from electronic annotation	---	---	IPR003890 // Initiation factor eIF-4 gamma, middle // 7.7E-41
2567	143766_i_at	1.17809	2.42936	11.5746	7.16212e-13	2.63363e-11	19.1769	FBgn0014857	CG5825	His3.3A	Histone H3.3A	33736	3677 // DNA binding // inferred from sequence or structural similarity /// 5515 // protein binding // inferred from physical interaction /// 3677 // DNA binding // inferred from electronic annotation /// 3677 // DNA binding // non-traceable author statement /// 3677 // DNA binding // inferred from sequence similarity	6333 // chromatin assembly or disassembly // inferred from sequence or structural similarity /// 6334 // nucleosome assembly // inferred from electronic annotation /// 7155 // cell adhesion // inferred from mutant phenotype /// 8360 // regulation of cell shape // inferred from mutant phenotype /// 7001 // chromosome organization and biogenesis (sensu Eukaryota) // inferred from electronic annotat…	786 // nucleosome // inferred from sequence or structural similarity /// 5634 // nucleus // inferred from electronic annotation /// 786 // nucleosome // inferred from electronic annotation /// 5694 // chromosome // inferred from electronic annotation /// 786 // nucleosome // non-traceable author statement /// 786 // nucleosome // inferred from sequence similarity	IPR007125 // Histone core // 2.1E-29
13286	154485_at	0.733728	2.58016	11.5607	7.38596e-13	2.70883e-11	19.1458	FBgn0001301	CG7210	kel	kelch	35084	3779 // actin binding // inferred from direct assay /// 3779 // actin binding // inferred from sequence or structural similarity /// 3779 // actin binding // non-traceable author statement /// 5515 // protein binding // inferred from physical interaction /// 3779 // actin binding // inferred from electronic annotation /// 5515 // protein binding // inferred from electronic annotation /// 8430 // …	6915 // apoptosis // inferred from electronic annotation /// 7297 // follicle cell migration (sensu Insecta) // inferred from mutant phenotype /// 7301 // ovarian ring canal formation // inferred from direct assay /// 7301 // ovarian ring canal formation // inferred from mutant phenotype /// 7301 // ovarian ring canal formation // non-traceable author statement /// 7303 // cytoplasmic transport, …	5938 // cell cortex // non-traceable author statement /// 35183 // ring canal inner rim // traceable author statement /// 45172 // ring canal (sensu Insecta) // inferred from direct assay /// 45172 // ring canal (sensu Insecta) // non-traceable author statement /// 45172 // ring canal (sensu Insecta) // traceable author statement /// 5856 // cytoskeleton // inferred from electronic annotation	IPR006652 // Kelch repeat // 1.7E-6 /// IPR006652 // Kelch repeat // 1.6E-15 /// IPR006652 // Kelch repeat // 1.1E-18 /// IPR006652 // Kelch repeat // 2.2E-18 /// IPR006652 // Kelch repeat // 1.0E-17 /// IPR006652 // Kelch repeat // 1.0E-15 /// IPR000210 // BTB/POZ domain // 2.7E-45
12950	154149_at	1.46901	2.12942	11.5453	7.64238e-13	2.79058e-11	19.1113	FBgn0032388	CG6686	CG6686	CG6686	34608	30528 // transcription regulator activity // inferred from electronic annotation /// 5515 // protein binding // inferred from physical interaction	6139 // nucleobase, nucleoside, nucleotide and nucleic acid metabolism // inferred from electronic annotation /// 6366 // transcription from RNA polymerase II promoter // inferred from electronic annotation	---	IPR005011 // SART-1 protein // 1.0E-126 /// IPR005011 // SART-1 protein // 1.0E-126 /// IPR005011 // SART-1 protein // 1.0E-126
13932	155131_at	0.756974	1.14484	11.5449	7.64871e-13	2.79058e-11	19.1105	FBgn0037719	CG9424	bocksbeutel	bocksbeutel	41162	5515 // protein binding // inferred from physical interaction	---	5635 // nuclear envelope // inferred from electronic annotation	---
7924	149123_at	1.28821	1.07338	11.5244	8.00598e-13	2.9092e-11	19.0643	FBgn0028978	CG5408	trbl	tribbles	43999	4674 // protein serine/threonine kinase activity // inferred from sequence or structural similarity /// 4674 // protein serine/threonine kinase activity // traceable author statement /// 4702 // receptor signaling protein serine/threonine kinase activity // inferred from electronic annotation /// 5524 // ATP binding // inferred from electronic annotation /// 5515 // protein binding // inferred fr…	74 // regulation of progression through cell cycle // inferred from mutant phenotype /// 6468 // protein amino acid phosphorylation // inferred from electronic annotation /// 7165 // signal transduction // inferred from electronic annotation /// 7369 // gastrulation // non-traceable author statement /// 7370 // ventral furrow formation // inferred from genetic interaction /// 45839 // negative re…	---	IPR000719 // Protein kinase // 5.6E-5 /// IPR000719 // Protein kinase // 1.1E-16
3822	145021_at	0.913348	0.604639	11.4551	9.34207e-13	3.33034e-11	18.9082	FBgn0030506	CG12176	Lig4	Ligase4	32322	3676 // nucleic acid binding // inferred from electronic annotation /// 3910 // DNA ligase (ATP) activity // inferred from sequence or structural similarity /// 5524 // ATP binding // inferred from electronic annotation /// 3910 // DNA ligase (ATP) activity // inferred from electronic annotation /// 3910 // DNA ligase (ATP) activity // inferred from sequence similarity	6260 // DNA replication // inferred from electronic annotation /// 6281 // DNA repair // inferred from electronic annotation /// 6310 // DNA recombination // inferred from electronic annotation	5634 // nucleus // inferred from sequence or structural similarity /// 5622 // intracellular // inferred from electronic annotation /// 5634 // nucleus // inferred from sequence similarity	IPR000977 // ATP-dependent DNA ligase // 8.1E-13 /// IPR000977 // ATP-dependent DNA ligase // 5.0E-78 /// IPR000977 // ATP-dependent DNA ligase // 1.7E-6
11259	152458_at	0.806727	2.98868	11.449	9.46957e-13	3.36617e-11	18.8945	FBgn0025592	CG18374	Gyk	Glycerol kinase	43913	4370 // glycerol kinase activity // non-traceable author statement /// 16491 // oxidoreductase activity // inferred from electronic annotation /// 19200 // carbohydrate kinase activity // inferred from electronic annotation /// 4370 // glycerol kinase activity // inferred from electronic annotation /// 16301 // kinase activity // inferred from electronic annotation /// 16740 // transferase activi…	5975 // carbohydrate metabolism // inferred from electronic annotation /// 6072 // glycerol-3-phosphate metabolism // inferred from electronic annotation /// 6629 // lipid metabolism // inferred from electronic annotation /// 6810 // transport // inferred from electronic annotation	---	IPR000577 // Carbohydrate kinase, FGGY // 1.4E-78 /// IPR000577 // Carbohydrate kinase, FGGY // 3.4E-65 /// IPR000577 // Carbohydrate kinase, FGGY // 7.3E-63 /// IPR000577 // Carbohydrate kinase, FGGY // 3.4E-65
6501	147700_at	0.777179	1.92099	11.4252	9.98483e-13	3.52361e-11	18.8409	FBgn0050269	CG30269	CG30269	CG30269	37600	---	---	---	---
13580	154779_at	0.612064	1.81609	11.4136	1.02473e-12	3.59281e-11	18.8147	FBgn0039234	CG7012	nct	nicastrin	42964	---	6509 // membrane protein ectodomain proteolysis // inferred from mutant phenotype /// 6509 // membrane protein ectodomain proteolysis // non-traceable author statement /// 7010 // cytoskeleton organization and biogenesis // inferred from mutant phenotype /// 7219 // Notch signaling pathway // inferred from mutant phenotype /// 7219 // Notch signaling pathway // non-traceable author statement /// …	5886 // plasma membrane // non-traceable author statement /// 16021 // integral to membrane // non-traceable author statement /// 16020 // membrane // inferred from electronic annotation /// 16021 // integral to membrane // inferred from electronic annotation	IPR008710 // Nicastrin // 1.0E-126 /// IPR008710 // Nicastrin // 1.0E-126
1064	142263_at	0.812076	0.796366	11.3071	1.30109e-12	4.47868e-11	18.5732	FBgn0052836	CG32836	CG32836	CG32836	318240	---	---	---	---
1595	142794_at	1.1903	3.19641	11.2198	1.5843e-12	5.37399e-11	18.374	FBgn0017581	CG17342	Lk6	Lk6	44672	4672 // protein kinase activity // inferred from direct assay /// 4674 // protein serine/threonine kinase activity // inferred from sequence or structural similarity /// 4674 // protein serine/threonine kinase activity // non-traceable author statement /// 4702 // receptor signaling protein serine/threonine kinase activity // inferred from electronic annotation /// 5524 // ATP binding // inferred…	6468 // protein amino acid phosphorylation // non-traceable author statement /// 7017 // microtubule-based process // inferred from mutant phenotype /// 7242 // intracellular signaling cascade // inferred from electronic annotation /// 40008 // regulation of growth // inferred from mutant phenotype /// 6468 // protein amino acid phosphorylation // inferred from electronic annotation	5635 // nuclear envelope // inferred from direct assay /// 5737 // cytoplasm // inferred from direct assay /// 5813 // centrosome // inferred from direct assay /// 5874 // microtubule // inferred from direct assay	IPR000719 // Protein kinase // 8.1E-76 /// IPR000719 // Protein kinase // 8.1E-76
11959	153158_at	0.857875	3.2381	11.1242	1.96736e-12	6.54695e-11	18.155	FBgn0000318 /// FBgn0067992	CG11024	cl /// Dyakcl	clot /// cl	43938	30508 // thiol-disulfide exchange intermediate activity // non-traceable author statement /// 5515 // protein binding // inferred from physical interaction	6118 // electron transport // inferred from electronic annotation	---	IPR010357 // Eukaryotic protein of unknown function DUF953 // 3.6E-83
13043	154242_at	0.686371	1.98497	11.1156	2.00587e-12	6.65931e-11	18.1354	FBgn0027280	CG2206	l(1)G0193	lethal (1) G0193	31712	3924 // GTPase activity // inferred from electronic annotation /// 5525 // GTP binding // inferred from electronic annotation	6955 // immune response // inferred from electronic annotation	---	---
292	141491_at	0.723122	1.04231	11.1099	2.03227e-12	6.73099e-11	18.1222	FBgn0028343	CG8465	l(1)G0222	lethal (1) G0222	32732	---	---	---	IPR002110 // Ankyrin // 11.0 /// IPR002110 // Ankyrin // 4.8E-7 /// IPR002110 // Ankyrin // 11.0 /// IPR002110 // Ankyrin // 4.8E-7
9837	151036_f_at	2.77475	0.423338	11.102	2.06893e-12	6.83625e-11	18.1041	FBgn0051354 /// FBgn0013277 /// FBgn0013276 /// FBgn0013278 /// FBgn0013279	CG18743 /// CG31449 /// CG5834 /// CG31359 /// CG6489	Hsp70Bbb /// Hsp70Ba /// Hsp70Ab /// Hsp70Bb /// Hsp70Bc	Hsp70Bbb /// Heat-shock-protein-70Ba /// Heat-shock-protein-70Ab /// Heat-shock-protein-70Bb /// Heat-shock-protein-70Bc	44920 /// 44921 /// 48582 /// 48583 /// 50022	5524 // ATP binding // inferred from electronic annotation /// 166 // nucleotide binding // inferred from electronic annotation	6457 // protein folding // inferred from electronic annotation /// 6461 // protein complex assembly // inferred from electronic annotation /// 6952 // defense response // inferred from electronic annotation /// 9408 // response to heat // inferred from sequence or structural similarity /// 9408 // response to heat // non-traceable author statement /// 6986 // response to unfolded protein // infer…	---	IPR001023 // Heat shock protein Hsp70 // 1.0E-126
8108	149307_at	0.571425	1.96166	11.0408	2.37829e-12	7.71294e-11	17.9631	FBgn0037292	CG2022	CG2022	CG2022	40615	5057 // receptor signaling protein activity // inferred from electronic annotation	---	5778 // peroxisomal membrane // inferred from sequence or structural similarity /// 16021 // integral to membrane // inferred from electronic annotation /// 5778 // peroxisomal membrane // inferred from sequence similarity	IPR007248 // Mpv17/PMP22 // 5.4E-46
9516	150715_at	0.771138	0.641779	11.0288	2.44463e-12	7.89155e-11	17.9353	FBgn0039492	CG6051	CG6051	CG6051	43271	8270 // zinc ion binding // inferred from electronic annotation	---	---	IPR000306 // Zn-finger, FYVE type // 1.3E-28 /// IPR000306 // Zn-finger, FYVE type // 1.3E-28
12651	153850_at	1.07981	3.64567	10.8678	3.5365e-12	1.13378e-10	17.5618	FBgn0038100	CG12358	Paip2	polyA-binding protein interacting protein 2	41591	5515 // protein binding // inferred from physical interaction	1558 // regulation of cell growth // inferred from mutant phenotype /// 16478 // negative regulation of translation // inferred from direct assay /// 16478 // negative regulation of translation // inferred from sequence or structural similarity /// 16478 // negative regulation of translation // inferred from sequence similarity	---	---
1964	143163_at	0.695516	0.323209	10.8443	3.73329e-12	1.19414e-10	17.507	FBgn0000715	CG2346	Fmrf	FMRFamide-related	36030	5179 // hormone activity // non-traceable author statement /// 5184 // neuropeptide hormone activity // non-traceable author statement /// 5184 // neuropeptide hormone activity // traceable author statement	6936 // muscle contraction // inferred from electronic annotation /// 7218 // neuropeptide signaling pathway // non-traceable author statement /// 7218 // neuropeptide signaling pathway // traceable author statement /// 45822 // negative regulation of heart contraction // inferred from direct assay /// 7218 // neuropeptide signaling pathway // inferred from electronic annotation	---	IPR002544 // FMRFamide-related peptide // 1.3 /// IPR002544 // FMRFamide-related peptide // 0.0037 /// IPR002544 // FMRFamide-related peptide // 0.0037 /// IPR002544 // FMRFamide-related peptide // 0.0037 /// IPR002544 // FMRFamide-related peptide // 0.0037 /// IPR002544 // FMRFamide-related peptide // 0.0037 /// IPR002544 // FMRFamide-related peptide // 0.0021 /// IPR002544 // FMRFamide-related …
12854	154053_at	1.07267	3.30775	10.8097	4.04361e-12	1.2817e-10	17.4263	FBgn0020653	CG2151	Trxr-1	Thioredoxin reductase-1	31760	4362 // glutathione-disulfide reductase activity // inferred from direct assay /// 4362 // glutathione-disulfide reductase activity // non-traceable author statement /// 4791 // thioredoxin-disulfide reductase activity // inferred from direct assay /// 4791 // thioredoxin-disulfide reductase activity // inferred from sequence or structural similarity /// 16209 // antioxidant activity // inferred …	6125 // thioredoxin pathway // inferred from direct assay /// 6790 // sulfur metabolism // inferred from electronic annotation /// 8340 // determination of adult life span // traceable author statement /// 6125 // thioredoxin pathway // inferred from mutant phenotype /// 6118 // electron transport // inferred from electronic annotation	5737 // cytoplasm // inferred from direct assay /// 5737 // cytoplasm // non-traceable author statement /// 5739 // mitochondrion // inferred from direct assay /// 5737 // cytoplasm // inferred from electronic annotation /// 5739 // mitochondrion // inferred from electronic annotation	IPR004099 // Pyridine nucleotide-disulphide oxidoreductase dimerisation domain // 8.3E-42 /// IPR001327 // FAD-dependent pyridine nucleotide-disulphide oxidoreductase // 8.2E-94 /// IPR004099 // Pyridine nucleotide-disulphide oxidoreductase dimerisation domain // 8.3E-42 /// IPR001327 // FAD-dependent pyridine nucleotide-disulphide oxidoreductase // 8.2E-94 /// IPR004099 // Pyridine nucleotide-di…
2235	143434_at	1.00411	5.22265	10.8002	4.13275e-12	1.30699e-10	17.4042	FBgn0004173	CG17934	Mst84Db	Male-specific RNA 84Db	40888	5506 // iron ion binding // inferred from electronic annotation	6118 // electron transport // inferred from electronic annotation /// 7275 // development // inferred from electronic annotation /// 7283 // spermatogenesis // inferred from electronic annotation /// 30154 // cell differentiation // inferred from electronic annotation	---	IPR005634 // Male specific sperm protein // 7.3E-17
10615	151814_at	1.24231	1.44753	10.793	4.20277e-12	1.32316e-10	17.3872	FBgn0035714	CG8549	CG8549	CG8549	38749	---	---	---	IPR002140 // Protein of unknown function UPF0023 // 3.6E-102 /// IPR002140 // Protein of unknown function UPF0023 // 2.0E-100
12092	153291_at	0.809182	0.67594	10.774	4.39126e-12	1.37941e-10	17.3428	FBgn0037926	CG10535	CG10535	CG10535	41399	19209 // kinase activator activity // inferred from electronic annotation	6605 // protein targeting // inferred from electronic annotation /// 6952 // defense response // non-traceable author statement /// 7165 // signal transduction // non-traceable author statement /// 8105 // asymmetric protein localization // inferred from electronic annotation /// 19221 // cytokine and chemokine mediated signaling pathway // inferred from electronic annotation	---	IPR006849 // IKI3 family // 1.0E-126
3689	144888_at	0.870769	1.22839	10.7607	4.52839e-12	1.4193e-10	17.3117	FBgn0030319	CG2533	CG2533	CG2533	32110	---	---	---	---
2706	143905_at	1.07867	1.02607	10.7539	4.6003e-12	1.43862e-10	17.2958	FBgn0019940	CG5192	Rh6	Rhodopsin 6	41889	8020 // G-protein coupled photoreceptor activity // inferred from genetic interaction /// 8020 // G-protein coupled photoreceptor activity // inferred from sequence or structural similarity /// 8020 // G-protein coupled photoreceptor activity // non-traceable author statement /// 1584 // rhodopsin-like receptor activity // inferred from electronic annotation /// 4871 // signal transducer activity…	7186 // G-protein coupled receptor protein signaling pathway // inferred from sequence or structural similarity /// 7600 // sensory perception // inferred from electronic annotation /// 7601 // visual perception // inferred from electronic annotation /// 7602 // phototransduction // inferred from genetic interaction /// 7602 // phototransduction // inferred from sequence or structural similarity …	16021 // integral to membrane // inferred from sequence or structural similarity /// 16021 // integral to membrane // non-traceable author statement /// 16028 // rhabdomere // inferred from direct assay /// 16020 // membrane // inferred from electronic annotation /// 16021 // integral to membrane // inferred from electronic annotation /// 16021 // integral to membrane // inferred from sequence si…	IPR000276 // Rhodopsin-like GPCR superfamily // 3.9E-67
12416	153615_at	1.10189	2.42829	10.7107	5.08626e-12	1.58001e-10	17.1942	FBgn0030245	CG1637	CG1637	CG1637	32019	3993 // acid phosphatase activity // inferred from sequence or structural similarity /// 16787 // hydrolase activity // inferred from electronic annotation /// 3993 // acid phosphatase activity // inferred from sequence similarity	6796 // phosphate metabolism // inferred from electronic annotation	---	IPR004843 // Metallo-phosphoesterase // 1.6E-20
10994	152193_at	0.835291	0.643417	10.7004	5.20896e-12	1.61455e-10	17.1701	FBgn0030033	CG1387	CG1387	CG1387	31770	---	---	---	---
13084	154283_at	0.500429	0.166739	10.6851	5.39722e-12	1.66921e-10	17.1342	FBgn0030365	CG1796	CG1796	CG1796	32168	---	7165 // signal transduction // inferred from electronic annotation	---	IPR001680 // G-protein beta WD-40 repeat // 4.7E-11 /// IPR001680 // G-protein beta WD-40 repeat // 1.2E-9 /// IPR001680 // G-protein beta WD-40 repeat // 1.6E-10 /// IPR001680 // G-protein beta WD-40 repeat // 3.6E-9 /// IPR001680 // G-protein beta WD-40 repeat // 9.6E-5 /// IPR001680 // G-protein beta WD-40 repeat // 3.5E-7 /// IPR001680 // G-protein beta WD-40 repeat // 5.6E-4
9514	150713_at	0.790178	0.81728	10.6655	5.64923e-12	1.73185e-10	17.088	FBgn0039488	CG6066	CG6066	CG6066	43267	---	---	---	IPR009269 // Protein of unknown function DUF926 // 3.7E-91
2002	143201_at	0.910454	0.78775	10.6272	6.17715e-12	1.8732e-10	16.9976	FBgn0001258	CG10160	ImpL3	Ecdysone-inducible gene L3	45880	4459 // L-lactate dehydrogenase activity // inferred from sequence or structural similarity /// 4459 // L-lactate dehydrogenase activity // non-traceable author statement /// 4459 // L-lactate dehydrogenase activity // traceable author statement /// 5515 // protein binding // inferred from physical interaction /// 4459 // L-lactate dehydrogenase activity // inferred from electronic annotation ///…	6096 // glycolysis // non-traceable author statement /// 6100 // tricarboxylic acid cycle intermediate metabolism // inferred from electronic annotation /// 6096 // glycolysis // inferred from electronic annotation /// 19642 // anaerobic glycolysis // inferred from electronic annotation	5737 // cytoplasm // inferred from electronic annotation	IPR001236 // Lactate/malate dehydrogenase // 4.6E-61 /// IPR001236 // Lactate/malate dehydrogenase // 6.5E-71
4180	145379_at	0.739524	0.16216	10.5585	7.25347e-12	2.17604e-10	16.8351	FBgn0031036	CG14220	CG14220	CG14220	32954	---	---	---	---
11540	152739_at	1.12214	1.33379	10.5565	7.288e-12	2.18173e-10	16.8303	---	CG15891 /// CG15892	---	---	---	---	---	---	---
8804	150003_at	0.624723	0.448846	10.5165	8.00391e-12	2.36382e-10	16.7356	FBgn0038412	CG6898	Zip3	Zinc/iron regulated transporter-related protein 3	41975	46873 // metal ion transporter activity // non-traceable author statement /// 46873 // metal ion transporter activity // inferred from electronic annotation	6812 // cation transport // inferred from electronic annotation /// 30001 // metal ion transport // inferred from electronic annotation	16020 // membrane // inferred from electronic annotation	IPR003689 // Zinc transporter ZIP // 3.4E-114
10857	152056_at	1.15665	4.60611	10.5159	8.01679e-12	2.36382e-10	16.7339	FBgn0003231	CG10360	ref(2)P	refractory to sigma P	35246	4197 // cysteine-type endopeptidase activity // inferred from electronic annotation /// 8270 // zinc ion binding // inferred from electronic annotation /// 30528 // transcription regulator activity // inferred from electronic annotation /// 5515 // protein binding // inferred from physical interaction /// 3677 // DNA binding // inferred from electronic annotation /// 46872 // metal ion binding //…	6508 // proteolysis // inferred from electronic annotation /// 19058 // viral infectious cycle // non-traceable author statement	5634 // nucleus // non-traceable author statement /// 5634 // nucleus // inferred from electronic annotation	IPR000433 // Zn-finger, ZZ type // 8.7E-25 /// IPR000270 // Octicosapeptide/Phox/Bem1p // 4.3E-8
4228	145427_at	0.774062	0.291949	10.487	8.58005e-12	2.5043e-10	16.6652	FBgn0031114	CG1676	cactin	cactin	33043	---	6952 // defense response // non-traceable author statement /// 7165 // signal transduction // non-traceable author statement /// 9950 // dorsal/ventral axis specification // inferred from genetic interaction	---	---
9823	151022_at	1.35456	2.04342	10.4789	8.74337e-12	2.54667e-10	16.6462	FBgn0053936	CG33936	CG33936	CG33936	41114	3677 // DNA binding // inferred from electronic annotation /// 8270 // zinc ion binding // inferred from electronic annotation	---	---	---
9010	150209_at	0.719736	1.01789	10.4544	9.26365e-12	2.68005e-10	16.5877	FBgn0038722	CG7360	Nup58	Nup58	42342	5487 // nucleocytoplasmic transporter activity // inferred from sequence or structural similarity /// 5515 // protein binding // inferred from physical interaction /// 5487 // nucleocytoplasmic transporter activity // inferred from sequence similarity	6913 // nucleocytoplasmic transport // inferred from sequence or structural similarity /// 6810 // transport // inferred from electronic annotation /// 6913 // nucleocytoplasmic transport // inferred from sequence similarity	5643 // nuclear pore // inferred from sequence or structural similarity /// 5634 // nucleus // inferred from electronic annotation /// 5643 // nuclear pore // inferred from sequence similarity	---
4195	145394_at	0.99645	1.62521	10.4473	9.41894e-12	2.71521e-10	16.5709	FBgn0031068	CG12534	CG12534	CG12534	32991	16971 // flavin-linked sulfhydryl oxidase activity // inferred from sequence or structural similarity /// 16971 // flavin-linked sulfhydryl oxidase activity // inferred from sequence similarity	6118 // electron transport // inferred from electronic annotation /// 6119 // oxidative phosphorylation // inferred from electronic annotation	5739 // mitochondrion // inferred from sequence or structural similarity /// 5739 // mitochondrion // inferred from sequence similarity	IPR006863 // Erv1/Alr // 2.3E-61
3571	144770_at	1.00852	1.6177	10.4437	9.49959e-12	2.72724e-10	16.5622	FBgn0030158	CG9686	CG9686	CG9686	31921	---	---	---	---
9216	150415_at	0.915828	1.33226	10.4371	9.6492e-12	2.75326e-10	16.5464	FBgn0039043	CG17121	CG17121	CG17121	42721	16616 // oxidoreductase activity, acting on the CH-OH group of donors, NAD or NADP as acceptor // inferred from sequence or structural similarity /// 5515 // protein binding // inferred from physical interaction /// 16491 // oxidoreductase activity // inferred from electronic annotation /// 16616 // oxidoreductase activity, acting on the CH-OH group of donors, NAD or NADP as acceptor // inferred …	7601 // visual perception // inferred from electronic annotation /// 8152 // metabolism // inferred from electronic annotation	---	IPR002198 // Short-chain dehydrogenase/reductase SDR // 1.0E-42
7352	148551_at	0.591429	1.75089	10.4063	1.03773e-11	2.93116e-10	16.4728	FBgn0036127	CG7828	CG7828	CG7828	39244	4839 // ubiquitin activating enzyme activity // inferred from sequence or structural similarity /// 16874 // ligase activity // inferred from electronic annotation /// 5515 // protein binding // inferred from physical interaction /// 19781 // NEDD8 activating enzyme activity // inferred from sequence or structural similarity /// 46982 // protein heterodimerization activity // inferred from sequen…	6464 // protein modification // inferred from electronic annotation /// 45116 // protein neddylation // inferred from sequence or structural similarity /// 6512 // ubiquitin cycle // inferred from electronic annotation	5626 // insoluble fraction // inferred from sequence or structural similarity	IPR000594 // UBA/THIF-type NAD/FAD binding fold // 9.5E-30
2568	143767_r_at	1.00469	2.58868	10.3261	1.25465e-11	3.50852e-10	16.2808	FBgn0014857	CG5825	His3.3A	Histone H3.3A	33736	3677 // DNA binding // inferred from sequence or structural similarity /// 5515 // protein binding // inferred from physical interaction /// 3677 // DNA binding // inferred from electronic annotation /// 3677 // DNA binding // non-traceable author statement /// 3677 // DNA binding // inferred from sequence similarity	6333 // chromatin assembly or disassembly // inferred from sequence or structural similarity /// 6334 // nucleosome assembly // inferred from electronic annotation /// 7155 // cell adhesion // inferred from mutant phenotype /// 8360 // regulation of cell shape // inferred from mutant phenotype /// 7001 // chromosome organization and biogenesis (sensu Eukaryota) // inferred from electronic annotat…	786 // nucleosome // inferred from sequence or structural similarity /// 5634 // nucleus // inferred from electronic annotation /// 786 // nucleosome // inferred from electronic annotation /// 5694 // chromosome // inferred from electronic annotation /// 786 // nucleosome // non-traceable author statement /// 786 // nucleosome // inferred from sequence similarity	IPR007125 // Histone core // 2.1E-29
7640	148839_at	0.970365	1.62142	10.2875	1.37494e-11	3.80689e-10	16.1882	FBgn0036556	CG5830	CG5830	CG5830	39748	16791 // phosphoric monoester hydrolase activity // inferred from electronic annotation	7275 // development // inferred from electronic annotation /// 7498 // mesoderm development // inferred from electronic annotation	---	IPR004274 // NLI interacting factor // 1.2E-96
11831	153030_at	1.69501	2.29827	10.2814	1.39522e-11	3.84029e-10	16.1734	FBgn0036663	CG9674	CG9674	CG9674	39878	4355 // glutamate synthase (NADPH) activity // inferred from sequence or structural similarity /// 4497 // monooxygenase activity // inferred from electronic annotation /// 15036 // disulfide oxidoreductase activity // inferred from electronic annotation /// 5515 // protein binding // inferred from physical interaction /// 16491 // oxidoreductase activity // inferred from electronic annotation //…	5975 // carbohydrate metabolism // inferred from electronic annotation /// 6118 // electron transport // inferred from electronic annotation /// 6537 // glutamate biosynthesis // inferred from electronic annotation /// 6807 // nitrogen compound metabolism // inferred from electronic annotation /// 8652 // amino acid biosynthesis // inferred from electronic annotation /// 8152 // metabolism // inf…	---	IPR002489 // Protein of unknown function DUF14 // 8.0E-89 /// IPR001327 // FAD-dependent pyridine nucleotide-disulphide oxidoreductase // 1.1E-24 /// IPR002932 // Ferredoxin-dependent glutamate synthase // 1.3E-35 /// IPR006981 // Glutamate synthase amidotransferase domain // 1.0E-126 /// IPR002489 // Protein of unknown function DUF14 // 8.0E-89 /// IPR001327 // FAD-dependent pyridine nucleotide-…
590	141789_at	1.0773	1.59369	10.2656	1.44847e-11	3.97124e-10	16.1355	FBgn0010812	CG2708	Tom34	Translocase of outer membrane 34	44910	3910 // DNA ligase (ATP) activity // inferred from electronic annotation /// 5386 // carrier activity // inferred from electronic annotation /// 5524 // ATP binding // inferred from electronic annotation /// 5488 // binding // inferred from electronic annotation	6260 // DNA replication // inferred from electronic annotation /// 6281 // DNA repair // inferred from electronic annotation /// 6310 // DNA recombination // inferred from electronic annotation	5742 // mitochondrial outer membrane translocase complex // inferred from sequence or structural similarity /// 5742 // mitochondrial outer membrane translocase complex // inferred from sequence similarity	IPR001440 // TPR repeat // 1.3E-4 /// IPR001440 // TPR repeat // 2.9E-9 /// IPR001440 // TPR repeat // 1.4E-4
4936	146135_at	0.849859	3.03095	10.2505	1.5018e-11	4.1014e-10	16.0989	FBgn0032208	CG5604	CG5604	CG5604	34378	4842 // ubiquitin-protein ligase activity // inferred from electronic annotation /// 16874 // ligase activity // inferred from electronic annotation /// 5488 // binding // inferred from electronic annotation	6464 // protein modification // inferred from electronic annotation /// 6508 // proteolysis // inferred from electronic annotation /// 6512 // ubiquitin cycle // inferred from electronic annotation /// 19538 // protein metabolism // inferred from electronic annotation	5838 // proteasome regulatory particle (sensu Eukaryota) // inferred from sequence or structural similarity /// 5622 // intracellular // inferred from electronic annotation /// 5838 // proteasome regulatory particle (sensu Eukaryota) // inferred from sequence similarity	IPR002110 // Ankyrin // 8.1E-5 /// IPR002110 // Ankyrin // 3.2E-5 /// IPR002110 // Ankyrin // 34.0 /// IPR000569 // HECT domain (Ubiquitin-protein ligase) // 1.6E-6 /// IPR000569 // HECT domain (Ubiquitin-protein ligase) // 1.8E-39 /// IPR010606 // Mib_herc2 // 6.6E-32
12700	153899_at	0.757519	5.16334	10.1992	1.69712e-11	4.57244e-10	15.9752	FBgn0013325	CG7726	RpL11	Ribosomal protein L11	37235	3676 // nucleic acid binding // inferred from electronic annotation /// 3735 // structural constituent of ribosome // inferred from sequence or structural similarity /// 3735 // structural constituent of ribosome // non-traceable author statement /// 5515 // protein binding // inferred from physical interaction /// 3723 // RNA binding // inferred from electronic annotation /// 3735 // structural …	6412 // protein biosynthesis // inferred from sequence or structural similarity /// 6412 // protein biosynthesis // non-traceable author statement /// 6412 // protein biosynthesis // inferred from electronic annotation /// 6412 // protein biosynthesis // inferred from sequence similarity	5840 // ribosome // non-traceable author statement /// 5842 // cytosolic large ribosomal subunit (sensu Eukaryota) // inferred from sequence or structural similarity /// 5842 // cytosolic large ribosomal subunit (sensu Eukaryota) // non-traceable author statement /// 5622 // intracellular // inferred from electronic annotation /// 5840 // ribosome // inferred from electronic annotation /// 30529 …	IPR002132 // Ribosomal protein L5 // 3.6E-24 /// IPR002132 // Ribosomal protein L5 // 1.5E-61 /// IPR002132 // Ribosomal protein L5 // 2.3E-20
9653	150852_at	0.534073	0.598749	10.1871	1.7469e-11	4.67956e-10	15.946	FBgn0039711	CG7824	CG7824	CG7824	43530	---	---	---	---
12784	153983_at	0.94881	1.97674	10.1343	1.98213e-11	5.27939e-10	15.8182	FBgn0030803	CG4880	CG4880	CG4880	32680	---	---	---	---
9341	150540_at	0.818353	1.38473	10.1236	2.03396e-11	5.39693e-10	15.7921	FBgn0039254	CG13645	CG13645	CG13645	42987	16740 // transferase activity // inferred from electronic annotation /// 16779 // nucleotidyltransferase activity // inferred from electronic annotation	6732 // coenzyme metabolism // inferred from electronic annotation /// 9058 // biosynthesis // inferred from electronic annotation /// 9435 // NAD biosynthesis // inferred from electronic annotation /// 51189 // prosthetic group metabolism // inferred from electronic annotation	---	IPR004820 // Cytidylyltransferase // 2.4E-35
8614	149813_at	0.975507	1.72399	10.1226	2.03844e-11	5.3986e-10	15.7898	FBgn0038107 /// FBgn0035198	CG17327	CG17327 /// CG9133	CG17327 /// CG9133	3772453 /// 41598	---	---	---	IPR002833 // Protein of unknown function UPF0099 // 6.3E-38
3688	144887_at	0.605322	0.697231	10.1053	2.1249e-11	5.61694e-10	15.7478	FBgn0030316	CG11695	CG11695	CG11695	32106	3676 // nucleic acid binding // inferred from electronic annotation /// 8270 // zinc ion binding // inferred from electronic annotation /// 30528 // transcription regulator activity // inferred from electronic annotation	6139 // nucleobase, nucleoside, nucleotide and nucleic acid metabolism // inferred from electronic annotation /// 6357 // regulation of transcription from RNA polymerase II promoter // inferred from electronic annotation /// 6366 // transcription from RNA polymerase II promoter // inferred from electronic annotation	5634 // nucleus // inferred from electronic annotation	IPR007087 // Zn-finger, C2H2 type // 1.4E-4 /// IPR007087 // Zn-finger, C2H2 type // 3.6E-5
3208	144407_at	0.621352	0.569658	10.0946	2.1804e-11	5.73121e-10	15.7217	FBgn0040377	CG8310	CG8310	CG8310	31235	8553 // hydrogen-exporting ATPase activity, phosphorylative mechanism // non-traceable author statement /// 46933 // hydrogen-transporting ATP synthase activity, rotational mechanism // inferred from electronic annotation /// 46961 // hydrogen-transporting ATPase activity, rotational mechanism // inferred from electronic annotation	6144 // purine base metabolism // inferred from electronic annotation /// 15986 // ATP synthesis coupled proton transport // inferred from electronic annotation /// 15992 // proton transport // non-traceable author statement	221 // hydrogen-transporting ATPase V1 domain // non-traceable author statement /// 16469 // proton-transporting two-sector ATPase complex // inferred from electronic annotation	IPR002699 // H+-transporting two-sector ATPase, D subunit // 1.9E-86
11001	152200_at	0.817309	0.882551	10.0856	2.22831e-11	5.83527e-10	15.6997	FBgn0003308	CG7642	ry	rosy	41605	4854 // xanthine dehydrogenase activity // non-traceable author statement /// 4854 // xanthine dehydrogenase activity // traceable author statement /// 4854 // xanthine dehydrogenase activity // inferred from electronic annotation /// 5506 // iron ion binding // inferred from electronic annotation /// 16491 // oxidoreductase activity // inferred from electronic annotation /// 30151 // molybdenum …	6118 // electron transport // inferred from electronic annotation /// 6144 // purine base metabolism // inferred from electronic annotation /// 6800 // oxygen and reactive oxygen species metabolism // inferred from electronic annotation /// 6952 // defense response // inferred from electronic annotation /// 48072 // eye pigmentation (sensu Endopterygota) // traceable author statement	5777 // peroxisome // non-traceable author statement /// 5777 // peroxisome // inferred from electronic annotation	IPR008274 // Aldehyde oxidase and xanthine dehydrogenase, molybdopterin binding // 1.0E-126 /// IPR000674 // Aldehyde oxidase and xanthine dehydrogenase, a/b hammerhead // 1.8E-61 /// IPR002346 // Molybdopterin dehydrogenase, FAD-binding // 1.0E-100 /// IPR002888 // [2Fe-2S]-binding // 1.3E-62 /// IPR005107 // CO dehydrogenase flavoprotein C-terminal domain // 2.9E-57 /// IPR001041 // Ferredoxin …
955	142154_at	0.782605	2.64949	10.0798	2.25917e-11	5.88307e-10	15.6858	FBgn0014396	CG3234	tim	timeless	---	5515 // protein binding // traceable author statement	7617 // mating behavior // inferred from mutant phenotype /// 7620 // copulation // inferred from mutant phenotype /// 45187 // regulation of circadian sleep/wake cycle, sleep // inferred from mutant phenotype /// 48512 // circadian behavior // inferred from mutant phenotype /// 48511 // rhythmic process // inferred from electronic annotation /// 7622 // rhythmic behavior // traceable author stat…	5634 // nucleus // inferred from electronic annotation /// 5634 // nucleus // traceable author statement /// 5737 // cytoplasm // traceable author statement /// 5634 // nucleus // non-traceable author statement /// 5737 // cytoplasm // non-traceable author statement	IPR006906 // Timeless protein // 2.5E-123 /// IPR006906 // Timeless protein // 1.0E-126 /// IPR006906 // Timeless protein // 1.0E-126
1439	142638_at	0.698277	1.74255	10.0785	2.26654e-11	5.89133e-10	15.6825	FBgn0014029	CG4173	2017-09-02	Septin-2	42438	3924 // GTPase activity // inferred from electronic annotation /// 3924 // GTPase activity // non-traceable author statement /// 5200 // structural constituent of cytoskeleton // inferred from electronic annotation /// 5515 // protein binding // inferred from physical interaction /// 5525 // GTP binding // inferred from sequence or structural similarity /// 166 // nucleotide binding // inferred f…	910 // cytokinesis // inferred from mutant phenotype /// 910 // cytokinesis // inferred from sequence or structural similarity /// 910 // cytokinesis // non-traceable author statement /// 7067 // mitosis // inferred from electronic annotation /// 7349 // cellularization // traceable author statement /// 7049 // cell cycle // inferred from electronic annotation /// 51301 // cell division // inferr…	5940 // septin ring // inferred from sequence or structural similarity /// 45172 // ring canal (sensu Insecta) // non-traceable author statement /// 5940 // septin ring // inferred from sequence similarity	IPR000038 // Cell division/GTP binding protein // 1.3E-120
11034	152233_at	0.937671	3.71597	10.0771	2.27401e-11	5.8998e-10	15.6792	FBgn0027657	CG9734	glob1	globin 1	41930	5344 // oxygen transporter activity // inferred from sequence or structural similarity /// 5386 // carrier activity // inferred from electronic annotation /// 5515 // protein binding // inferred from physical interaction /// 5344 // oxygen transporter activity // inferred from electronic annotation /// 5488 // binding // inferred from electronic annotation /// 5506 // iron ion binding // inferred…	15671 // oxygen transport // inferred from electronic annotation /// 6810 // transport // inferred from electronic annotation	---	IPR000971 // Globin // 8.7E-26 /// IPR000971 // Globin // 9.3E-4
9237	150436_at	0.730853	0.227177	10.0598	2.37062e-11	6.13907e-10	15.6371	FBgn0039067	CG4448	CG4448	CG4448	42750	16251 // general RNA polymerase II transcription factor activity // inferred from electronic annotation	6367 // transcription initiation from RNA polymerase II promoter // inferred from electronic annotation	---	IPR001680 // G-protein beta WD-40 repeat // 2.6E-6 /// IPR001680 // G-protein beta WD-40 repeat // 1.1E-8 /// IPR001680 // G-protein beta WD-40 repeat // 1.0E-13 /// IPR001680 // G-protein beta WD-40 repeat // 1.2E-6 /// IPR001680 // G-protein beta WD-40 repeat // 5.8E-11
10898	152097_at	0.685204	2.54905	10.0542	2.40316e-11	6.21185e-10	15.6233	FBgn0025712	CG13920	CG13920	CG13920	38203	---	---	---	---
11056	152255_at	0.802528	2.83853	10.0512	2.42061e-11	6.23397e-10	15.616	FBgn0039464	CG6330	CG6330	CG6330	43240	4850 // uridine phosphorylase activity // inferred from sequence or structural similarity /// 3824 // catalytic activity // inferred from electronic annotation /// 4850 // uridine phosphorylase activity // inferred from electronic annotation /// 4850 // uridine phosphorylase activity // inferred from sequence similarity	6206 // pyrimidine base metabolism // inferred from electronic annotation /// 9116 // nucleoside metabolism // inferred from electronic annotation /// 9166 // nucleotide catabolism // inferred from electronic annotation	5737 // cytoplasm // inferred from electronic annotation	---
2204	143403_at	1.09232	2.00894	10.0272	2.56423e-11	6.56763e-10	15.5577	FBgn0003975	CG3830	vg	vestigial	36421	5198 // structural molecule activity // inferred from electronic annotation	7018 // microtubule-based movement // inferred from electronic annotation /// 7476 // wing morphogenesis // non-traceable author statement /// 7476 // wing morphogenesis // traceable author statement /// 8587 // wing margin morphogenesis // non-traceable author statement	5634 // nucleus // non-traceable author statement /// 5874 // microtubule // inferred from electronic annotation	---
12014	153213_at	0.696714	2.98862	10.0238	2.58564e-11	6.61037e-10	15.5493	FBgn0037074	CG7324	CG7324	CG7324	40361	5097 // Rab GTPase activator activity // inferred from sequence or structural similarity /// 5515 // protein binding // inferred from physical interaction /// 5509 // calcium ion binding // inferred from electronic annotation /// 5097 // Rab GTPase activator activity // inferred from sequence similarity	74 // regulation of progression through cell cycle // inferred from electronic annotation /// 6886 // intracellular protein transport // inferred from electronic annotation /// 6887 // exocytosis // inferred from electronic annotation	---	IPR000195 // RabGAP/TBC domain // 1.3E-62 /// IPR004182 // GRAM domain // 4.4E-25 /// IPR004182 // GRAM domain // 1.9E-24
10205	151404_at	0.756933	0.297547	10.0199	2.61004e-11	6.6606e-10	15.5398	---	---	---	---	---	---	---	---	---
13766	154965_at	0.537922	0.753035	10.0094	2.67679e-11	6.81851e-10	15.5142	FBgn0003022	CG5581	Ote	Otefin	37090	5515 // protein binding // inferred from physical interaction	31468 // nuclear envelope reassembly // inferred from direct assay	5637 // nuclear inner membrane // inferred from direct assay /// 5637 // nuclear inner membrane // non-traceable author statement /// 5634 // nucleus // inferred from electronic annotation /// 5635 // nuclear envelope // inferred from electronic annotation /// 16020 // membrane // inferred from electronic annotation /// 16021 // integral to membrane // inferred from electronic annotation	---
8583	149782_at	2.29666	1.72579	10.0069	2.69287e-11	6.84703e-10	15.5082	FBgn0013279 /// FBgn0013278 /// FBgn0013277 /// FBgn0051354	CG31449 /// CG5834 /// CG31359 /// CG6489	Hsp70Bc /// Hsp70Bb /// Hsp70Ba /// Hsp70Bbb	Heat-shock-protein-70Bc /// Heat-shock-protein-70Bb /// Heat-shock-protein-70Ba /// Hsp70Bbb	44921 /// 48582 /// 48583 /// 50022	5524 // ATP binding // inferred from electronic annotation /// 166 // nucleotide binding // inferred from electronic annotation	6457 // protein folding // inferred from electronic annotation /// 6461 // protein complex assembly // inferred from electronic annotation /// 6952 // defense response // inferred from electronic annotation /// 9408 // response to heat // non-traceable author statement /// 9408 // response to heat // inferred from sequence or structural similarity /// 6986 // response to unfolded protein // infer…	---	IPR001023 // Heat shock protein Hsp70 // 1.0E-126
12341	153540_at	0.771614	2.56	10.0049	2.70624e-11	6.86856e-10	15.5032	FBgn0001202	CG10653	hk	hook	35169	5200 // structural constituent of cytoskeleton // inferred from electronic annotation /// 8017 // microtubule binding // inferred from direct assay /// 8017 // microtubule binding // inferred from electronic annotation	226 // microtubule cytoskeleton organization and biogenesis // inferred from electronic annotation /// 6886 // intracellular protein transport // inferred from electronic annotation /// 6897 // endocytosis // inferred from expression pattern /// 6897 // endocytosis // inferred from mutant phenotype /// 6897 // endocytosis // traceable author statement /// 16197 // endosome transport // traceable …	5737 // cytoplasm // non-traceable author statement /// 5768 // endosome // inferred from direct assay /// 45202 // synapse // inferred from mutant phenotype /// 5737 // cytoplasm // inferred from electronic annotation /// 5856 // cytoskeleton // inferred from electronic annotation /// 5874 // microtubule // inferred from electronic annotation /// 45202 // synapse // inferred from electronic anno…	IPR008636 // HOOK // 1.0E-126
12984	154183_at	0.604558	2.13133	9.97598	2.90201e-11	7.33884e-10	15.4325	FBgn0025720	CG9204	Ate1	Ate1	37288	4057 // arginyltransferase activity // non-traceable author statement /// 4057 // arginyltransferase activity // inferred from electronic annotation /// 8415 // acyltransferase activity // inferred from electronic annotation /// 16740 // transferase activity // inferred from electronic annotation	6511 // ubiquitin-dependent protein catabolism // non-traceable author statement /// 16598 // protein arginylation // non-traceable author statement /// 42176 // regulation of protein catabolism // inferred from electronic annotation /// 6512 // ubiquitin cycle // inferred from electronic annotation /// 16598 // protein arginylation // inferred from electronic annotation	---	IPR007472 // Arginine-tRNA-protein transferase, C-terminal // 2.5E-92 /// IPR007471 // Arginine-tRNA-protein transferase, N-terminal // 6.2E-48 /// IPR007472 // Arginine-tRNA-protein transferase, C-terminal // 1.1E-86 /// IPR007472 // Arginine-tRNA-protein transferase, C-terminal // 2.5E-92
11107	152306_at	0.851853	2.92037	9.96438	2.98461e-11	7.52056e-10	15.4041	FBgn0052626	CG32626	CG32626	CG32626	32352	3876 // AMP deaminase activity // inferred from sequence or structural similarity /// 19239 // deaminase activity // inferred from electronic annotation /// 3876 // AMP deaminase activity // inferred from electronic annotation /// 3876 // AMP deaminase activity // inferred from sequence similarity	6144 // purine base metabolism // inferred from electronic annotation /// 9168 // purine ribonucleoside monophosphate biosynthesis // inferred from electronic annotation	---	IPR001365 // Adenosine/AMP deaminase // 1.0E-126 /// IPR001365 // Adenosine/AMP deaminase // 1.0E-126 /// IPR001365 // Adenosine/AMP deaminase // 1.0E-126 /// IPR001365 // Adenosine/AMP deaminase // 1.0E-126
1115	142314_at	1.05206	4.73761	9.95762	3.03379e-11	7.59455e-10	15.3876	FBgn0035871	CG7188	CG7188	CG7188	38936	5515 // protein binding // inferred from physical interaction	6916 // anti-apoptosis // inferred from electronic annotation /// 43066 // negative regulation of apoptosis // inferred from sequence or structural similarity /// 6915 // apoptosis // inferred from electronic annotation /// 43066 // negative regulation of apoptosis // inferred from electronic annotation /// 43066 // negative regulation of apoptosis // inferred from sequence similarity	16021 // integral to membrane // inferred from electronic annotation /// 16020 // membrane // inferred from electronic annotation	---
1122	142321_at	1.57502	3.62849	9.95782	3.03234e-11	7.59455e-10	15.3881	FBgn0030277	CG1394	CG1394	CG1394	32059	5524 // ATP binding // inferred from electronic annotation	---	---	---
4066	145265_at	0.759613	1.22651	9.95863	3.02645e-11	7.59455e-10	15.39	FBgn0030876	CG6762	CG6762	CG6762	32768	3677 // DNA binding // inferred from electronic annotation /// 5515 // protein binding // inferred from physical interaction /// 16209 // antioxidant activity // inferred from electronic annotation /// 16491 // oxidoreductase activity // inferred from electronic annotation	---	---	---
3525	144724_at	0.917758	2.73626	9.94465	3.13063e-11	7.81821e-10	15.3558	FBgn0030079	CG7267	CG7267	CG7267	31831	---	---	---	---
10819	152018_at	0.667396	2.75809	9.89998	3.48874e-11	8.60514e-10	15.2462	FBgn0033522	CG11763	micr	midlife-crisis	36102	5386 // carrier activity // inferred from electronic annotation /// 8536 // Ran GTPase binding // inferred from sequence or structural similarity /// 8536 // Ran GTPase binding // inferred from sequence similarity	6605 // protein targeting // inferred from electronic annotation /// 30718 // germ-line stem cell maintenance // inferred from mutant phenotype /// 48477 // oogenesis // inferred from mutant phenotype	5813 // centrosome // inferred from sequence or structural similarity /// 5813 // centrosome // inferred from sequence similarity	IPR003877 // SPla/RYanodine receptor SPRY // 1.6E-34 /// IPR003877 // SPla/RYanodine receptor SPRY // 1.6E-34
8837	150036_at	1.01083	1.9021	9.88868	3.5858e-11	8.829e-10	15.2185	FBgn0038455	CG14907	CG14907	CG14907	42031	8168 // methyltransferase activity // inferred from electronic annotation	6139 // nucleobase, nucleoside, nucleotide and nucleic acid metabolism // inferred from electronic annotation	5634 // nucleus // inferred from electronic annotation	---
10702	151901_at	0.511399	0.788904	9.87811	3.6791e-11	9.027e-10	15.1925	FBgn0025878	CG10382	wrapper	wrapper	37555	---	7165 // signal transduction // inferred from electronic annotation /// 7398 // ectoderm development // inferred from electronic annotation /// 7399 // nervous system development // inferred from expression pattern /// 7409 // axonogenesis // inferred from mutant phenotype /// 16337 // cell-cell adhesion // inferred from electronic annotation /// 42063 // gliogenesis // inferred from mutant phenot…	19897 // extrinsic to plasma membrane // inferred from sequence or structural similarity /// 19897 // extrinsic to plasma membrane // inferred from sequence similarity	IPR003961 // Fibronectin, type III // 1.1E-6 /// IPR007110 // Immunoglobulin-like // 2.2E-5 /// IPR007110 // Immunoglobulin-like // 0.015 /// IPR007110 // Immunoglobulin-like // 0.0011
549	141748_at	0.88763	4.3963	9.87582	3.69967e-11	9.0616e-10	15.1869	FBgn0052030	CG32030	CG32030	CG32030	39004	3779 // actin binding // inferred from sequence or structural similarity /// 3677 // DNA binding // inferred from electronic annotation /// 3779 // actin binding // inferred from electronic annotation /// 5488 // binding // inferred from electronic annotation /// 3779 // actin binding // inferred from sequence similarity	16043 // cell organization and biogenesis // inferred from electronic annotation /// 30036 // actin cytoskeleton organization and biogenesis // inferred from electronic annotation	5634 // nucleus // inferred from electronic annotation	IPR003104 // Actin-binding FH2 // 1.4E-123
13161	154360_at	0.504857	0.326669	9.86682	3.78149e-11	9.24584e-10	15.1647	FBgn0029824	CG3726	CG3726	CG3726	31525	3677 // DNA binding // non-traceable author statement /// 3700 // transcription factor activity // inferred from electronic annotation /// 5515 // protein binding // inferred from electronic annotation /// 30528 // transcription regulator activity // inferred from electronic annotation /// 3677 // DNA binding // inferred from electronic annotation	6357 // regulation of transcription from RNA polymerase II promoter // inferred from electronic annotation /// 7530 // sex determination // inferred from electronic annotation /// 19226 // transmission of nerve impulse // inferred from electronic annotation /// 6355 // regulation of transcription, DNA-dependent // inferred from electronic annotation	5634 // nucleus // inferred from electronic annotation	IPR000210 // BTB/POZ domain // 7.3E-27 /// IPR007889 // Helix-turn-helix, Psq // 3.5E-9
5466	146665_at	0.564443	-0.809462	9.85289	3.91182e-11	9.51468e-10	15.1305	FBgn0033052	CG33131	SCAP	SCAP	35529	---	42 // protein targeting to Golgi // non-traceable author statement /// 16485 // protein processing // non-traceable author statement /// 35103 // sterol regulatory element binding-protein cleavage // inferred from sequence or structural similarity /// 35103 // sterol regulatory element binding-protein cleavage // non-traceable author statement /// 35103 // sterol regulatory element binding-protei…	5795 // Golgi stack // inferred from electronic annotation /// 16021 // integral to membrane // inferred from electronic annotation	IPR001680 // G-protein beta WD-40 repeat // 1.7E-5 /// IPR001680 // G-protein beta WD-40 repeat // 0.014 /// IPR001680 // G-protein beta WD-40 repeat // 1.4E-5 /// IPR001680 // G-protein beta WD-40 repeat // 1.1E-5 /// IPR001680 // G-protein beta WD-40 repeat // 5.0E-7
11462	152661_at	0.814497	2.21017	9.85332	3.90772e-11	9.51468e-10	15.1315	FBgn0030749	CG9968	Anxb11	Annexin B11	32612	3779 // actin binding // inferred from sequence or structural similarity /// 5509 // calcium ion binding // inferred from electronic annotation /// 5544 // calcium-dependent phospholipid binding // non-traceable author statement /// 8237 // metallopeptidase activity // inferred from electronic annotation /// 8270 // zinc ion binding // inferred from electronic annotation /// 5515 // protein bindi…	6508 // proteolysis // inferred from electronic annotation /// 6629 // lipid metabolism // inferred from electronic annotation /// 7155 // cell adhesion // inferred from mutant phenotype /// 8360 // regulation of cell shape // inferred from mutant phenotype /// 50819 // negative regulation of coagulation // inferred from electronic annotation	---	IPR001464 // Annexin // 2.6E-34 /// IPR001464 // Annexin // 6.6E-28 /// IPR001464 // Annexin // 7.0E-27 /// IPR001464 // Annexin // 1.7E-29 /// IPR001464 // Annexin // 2.6E-34 /// IPR001464 // Annexin // 6.6E-28 /// IPR001464 // Annexin // 7.0E-27 /// IPR001464 // Annexin // 1.7E-29
934	142133_at	0.846324	1.62305	9.85108	3.92908e-11	9.5401e-10	15.126	FBgn0024891	CG2098	ferrochelatase	ferrochelatase	43757	4325 // ferrochelatase activity // inferred from direct assay /// 4325 // ferrochelatase activity // inferred from sequence or structural similarity /// 4325 // ferrochelatase activity // non-traceable author statement /// 4325 // ferrochelatase activity // inferred from electronic annotation /// 5506 // iron ion binding // inferred from electronic annotation /// 16829 // lyase activity // inferr…	6782 // protoporphyrinogen IX biosynthesis // inferred from sequence or structural similarity /// 6782 // protoporphyrinogen IX biosynthesis // non-traceable author statement /// 6779 // porphyrin biosynthesis // inferred from electronic annotation /// 6783 // heme biosynthesis // inferred from electronic annotation /// 6782 // protoporphyrinogen IX biosynthesis // inferred from sequence similari…	5743 // mitochondrial inner membrane // inferred from sequence or structural similarity /// 5743 // mitochondrial inner membrane // non-traceable author statement /// 5739 // mitochondrion // inferred from electronic annotation /// 5743 // mitochondrial inner membrane // inferred from sequence similarity	IPR001015 // Ferrochelatase // 1.0E-126 /// IPR001015 // Ferrochelatase // 2.5E-97 /// IPR001015 // Ferrochelatase // 1.0E-126
1741	142940_at	0.765238	0.372521	9.83684	4.06777e-11	9.80886e-10	15.0909	FBgn0037850	CG14695	CG14695	CG14695	41314	---	---	---	---
12906	154105_at	0.591576	1.11042	9.83751	4.06111e-11	9.80886e-10	15.0926	FBgn0033897	CG8233	CG8233	CG8233	36560	---	---	---	---
11418	152617_at	0.64898	0.729624	9.81237	4.31782e-11	1.0323e-09	15.0306	FBgn0016696	CG4268	Pitslre	Pitslre	40292	4674 // protein serine/threonine kinase activity // inferred from sequence or structural similarity /// 4674 // protein serine/threonine kinase activity // non-traceable author statement /// 4702 // receptor signaling protein serine/threonine kinase activity // inferred from electronic annotation /// 5524 // ATP binding // inferred from electronic annotation /// 166 // nucleotide binding // infer…	74 // regulation of progression through cell cycle // non-traceable author statement /// 6468 // protein amino acid phosphorylation // inferred from sequence or structural similarity /// 6468 // protein amino acid phosphorylation // non-traceable author statement /// 7049 // cell cycle // inferred from mutant phenotype /// 7067 // mitosis // inferred from electronic annotation /// 7155 // cell ad…	5634 // nucleus // non-traceable author statement /// 5634 // nucleus // inferred from electronic annotation	IPR000719 // Protein kinase // 5.6E-85 /// IPR000719 // Protein kinase // 5.6E-85
12656	153855_at	0.617174	1.63277	9.81085	4.33376e-11	1.03434e-09	15.0268	FBgn0023214	CG15085	edl	ETS-domain lacking	37149	3677 // DNA binding // inferred from electronic annotation /// 5515 // protein binding // inferred from physical interaction /// 43565 // sequence-specific DNA binding // inferred from electronic annotation	6355 // regulation of transcription, DNA-dependent // inferred from physical interaction /// 7423 // sensory organ development // inferred from mutant phenotype /// 9880 // embryonic pattern specification // inferred from mutant phenotype /// 16481 // negative regulation of transcription // inferred from genetic interaction /// 42058 // regulation of epidermal growth factor receptor signaling pat…	5634 // nucleus // inferred from electronic annotation	IPR003118 // Sterile alpha motif (SAM)/Pointed domain // 2.3E-9
1193	142392_at	0.987318	4.53527	9.79074	4.5518e-11	1.08086e-09	14.9772	FBgn0042189	CG17376	CG17376	CG17376	59227	---	---	---	---
12079	153278_at	1.13372	2.0128	9.78122	4.6589e-11	1.10255e-09	14.9537	FBgn0010621	CG8439	Cct5	T-complex Chaperonin 5	36308	5524 // ATP binding // inferred from electronic annotation /// 42623 // ATPase activity, coupled // inferred from sequence or structural similarity /// 51082 // unfolded protein binding // inferred from sequence or structural similarity /// 166 // nucleotide binding // inferred from electronic annotation /// 5515 // protein binding // inferred from electronic annotation /// 51082 // unfolded prot…	6457 // protein folding // inferred from sequence or structural similarity /// 6457 // protein folding // inferred from electronic annotation /// 44267 // cellular protein metabolism // inferred from electronic annotation /// 6457 // protein folding // inferred from sequence similarity	5832 // chaperonin-containing T-complex // inferred from sequence or structural similarity /// 5832 // chaperonin-containing T-complex // inferred from sequence similarity	IPR002423 // Chaperonin Cpn60/TCP-1 // 1.0E-126 /// IPR002423 // Chaperonin Cpn60/TCP-1 // 1.0E-126
13561	154760_at	0.702949	1.76254	9.77249	4.75945e-11	1.12445e-09	14.9321	FBgn0035589	CG4618	CG4618	CG4618	38599	---	---	---	IPR005024 // Snf7 // 1.2E-59
6369	147568_at	1.57732	1.34434	9.75915	4.91718e-11	1.15781e-09	14.8991	FBgn0034542 /// FBgn0081473	CG9025	CG9025 /// DpseGA21487	CG9025 /// GA21487	37344	5057 // receptor signaling protein activity // inferred from electronic annotation /// 5102 // receptor binding // inferred from electronic annotation	---	---	IPR002110 // Ankyrin // 0.0088 /// IPR002110 // Ankyrin // 1.4E-8 /// IPR002110 // Ankyrin // 5.9E-7 /// IPR002110 // Ankyrin // 0.0034 /// IPR002110 // Ankyrin // 1.2E-7 /// IPR002110 // Ankyrin // 6.3 /// IPR002110 // Ankyrin // 0.0081 /// IPR002110 // Ankyrin // 8.4E-4 /// IPR002110 // Ankyrin // 0.0088 /// IPR002110 // Ankyrin // 1.4E-8 /// IPR002110 // Ankyrin // 5.9E-7 /// IPR002110 // Anky…
12624	153823_at	0.831374	3.00642	9.75159	5.00897e-11	1.17744e-09	14.8804	FBgn0033377	CG8073	Pmm45A	Phosphomannomutase 45A	35923	4615 // phosphomannomutase activity // inferred from sequence or structural similarity /// 4615 // phosphomannomutase activity // non-traceable author statement /// 16868 // intramolecular transferase activity, phosphotransferases // inferred from electronic annotation /// 4615 // phosphomannomutase activity // inferred from sequence similarity	5996 // monosaccharide metabolism // inferred from electronic annotation /// 5975 // carbohydrate metabolism // inferred from electronic annotation	---	IPR005844 // Phosphoglucomutase/phosphomannomutase alpha/beta/alpha domain I // 2.6E-48 /// IPR005844 // Phosphoglucomutase/phosphomannomutase alpha/beta/alpha domain I // 2.6E-48
2260	143459_at	0.800044	1.00189	9.73437	5.22475e-11	1.22406e-09	14.8377	FBgn0004397	CG3299	Vinc	Vinculin	31201	3779 // actin binding // inferred from sequence or structural similarity /// 5200 // structural constituent of cytoskeleton // inferred from electronic annotation /// 5515 // protein binding // inferred from physical interaction /// 3779 // actin binding // inferred from electronic annotation /// 5198 // structural molecule activity // inferred from electronic annotation /// 5515 // protein bindi…	6928 // cell motility // inferred from electronic annotation /// 7016 // cytoskeletal anchoring // inferred from sequence or structural similarity /// 7155 // cell adhesion // inferred from electronic annotation /// 7155 // cell adhesion // non-traceable author statement /// 7016 // cytoskeletal anchoring // inferred from sequence similarity	5925 // focal adhesion // inferred from sequence or structural similarity /// 15629 // actin cytoskeleton // inferred from electronic annotation /// 5856 // cytoskeleton // inferred from electronic annotation /// 5925 // focal adhesion // inferred from sequence similarity	IPR006077 // Vinculin/alpha-catenin // 1.0E-126
968	142167_at	0.6362	1.16372	9.72517	5.34383e-11	1.24987e-09	14.8149	FBgn0031497	CG17259	CG17259	CG17259	33518	3729 // mRNA binding // inferred from electronic annotation /// 4828 // serine-tRNA ligase activity // inferred from sequence or structural similarity /// 5524 // ATP binding // inferred from electronic annotation /// 5515 // protein binding // inferred from physical interaction /// 4812 // aminoacyl-tRNA ligase activity // inferred from electronic annotation /// 4828 // serine-tRNA ligase activi…	6434 // seryl-tRNA aminoacylation // inferred from sequence or structural similarity /// 6418 // tRNA aminoacylation for protein translation // inferred from electronic annotation /// 6434 // seryl-tRNA aminoacylation // inferred from electronic annotation /// 6434 // seryl-tRNA aminoacylation // inferred from sequence similarity	---	IPR002314 // tRNA synthetases, class-II (G, H, P and S) // 1.8E-51 /// IPR002317 // Seryl-tRNA synthetase, class IIa // 2.3E-27
12474	153673_at	0.987126	2.6869	9.70965	5.55106e-11	1.29187e-09	14.7764	FBgn0000083	CG5730	AnnIX	Annexin IX	42492	3779 // actin binding // inferred from sequence or structural similarity /// 5509 // calcium ion binding // inferred from sequence or structural similarity /// 5509 // calcium ion binding // non-traceable author statement /// 5543 // phospholipid binding // non-traceable author statement /// 5544 // calcium-dependent phospholipid binding // inferred from sequence or structural similarity /// 5515…	6629 // lipid metabolism // inferred from electronic annotation /// 50819 // negative regulation of coagulation // inferred from electronic annotation	---	IPR001464 // Annexin // 2.3E-30 /// IPR001464 // Annexin // 1.9E-29 /// IPR001464 // Annexin // 2.1E-26 /// IPR001464 // Annexin // 2.1E-27 /// IPR001464 // Annexin // 2.4E-32 /// IPR001464 // Annexin // 9.5E-24
3045	144244_at	0.831955	1.80173	9.66694	6.16483e-11	1.41821e-09	14.6704	FBgn0028685	CG3455	Rpt4	Rpt4	31567	166 // nucleotide binding // inferred from electronic annotation /// 3676 // nucleic acid binding // inferred from electronic annotation /// 4175 // endopeptidase activity // inferred from direct assay /// 5524 // ATP binding // inferred from electronic annotation /// 16887 // ATPase activity // inferred from sequence or structural similarity /// 16787 // hydrolase activity // inferred from elect…	6508 // proteolysis // inferred from direct assay /// 6508 // proteolysis // inferred from sequence or structural similarity /// 30163 // protein catabolism // inferred from electronic annotation /// 6508 // proteolysis // inferred from sequence similarity	5838 // proteasome regulatory particle (sensu Eukaryota) // inferred from direct assay /// 5838 // proteasome regulatory particle (sensu Eukaryota) // inferred from sequence or structural similarity /// 8540 // proteasome regulatory particle, base subcomplex (sensu Eukaryota) // inferred from sequence or structural similarity /// 8540 // proteasome regulatory particle, base subcomplex (sensu Euka…	IPR003959 // AAA ATPase, central region // 1.2E-95
2470	143669_at	0.725139	0.486427	9.64269	6.54373e-11	1.50045e-09	14.61	FBgn0050179	CG30179	CG30179	CG30179	246502	8270 // zinc ion binding // inferred from electronic annotation	7275 // development // inferred from electronic annotation /// 7498 // mesoderm development // inferred from electronic annotation /// 7517 // muscle development // inferred from electronic annotation /// 8283 // cell proliferation // inferred from electronic annotation	---	IPR001781 // Zn-binding protein, LIM // 2.2E-9 /// IPR001781 // Zn-binding protein, LIM // 2.7E-9
11758	152957_at	1.50767	2.4403	9.61631	6.9831e-11	1.58306e-09	14.5443	FBgn0052103	CG32103	CG32103	CG32103	39415	5386 // carrier activity // inferred from sequence or structural similarity /// 5488 // binding // inferred from electronic annotation /// 5509 // calcium ion binding // inferred from electronic annotation /// 5386 // carrier activity // inferred from sequence similarity	6810 // transport // inferred from sequence or structural similarity /// 6812 // cation transport // inferred from electronic annotation /// 6810 // transport // inferred from electronic annotation /// 6810 // transport // inferred from sequence similarity	5740 // mitochondrial envelope // inferred from sequence or structural similarity /// 5743 // mitochondrial inner membrane // inferred from electronic annotation /// 5778 // peroxisomal membrane // inferred from sequence or structural similarity /// 16020 // membrane // inferred from electronic annotation /// 16021 // integral to membrane // inferred from electronic annotation /// 5740 // mitocho…	IPR001993 // Mitochondrial substrate carrier // 4.5E-31 /// IPR001993 // Mitochondrial substrate carrier // 1.9E-35 /// IPR001993 // Mitochondrial substrate carrier // 2.2E-24 /// IPR001993 // Mitochondrial substrate carrier // 4.5E-31 /// IPR001993 // Mitochondrial substrate carrier // 1.9E-35 /// IPR001993 // Mitochondrial substrate carrier // 2.2E-24 /// IPR002048 // Calcium-binding EF-hand //…
11847	153046_at	0.951666	2.13045	9.61231	7.05235e-11	1.59618e-09	14.5343	FBgn0014031	CG3926	Spat	Serine pyruvate aminotransferase	31587	4760 // serine-pyruvate transaminase activity // inferred from sequence or structural similarity /// 4760 // serine-pyruvate transaminase activity // non-traceable author statement /// 8453 // alanine-glyoxylate transaminase activity // inferred from direct assay /// 8453 // alanine-glyoxylate transaminase activity // inferred from sequence or structural similarity /// 8483 // transaminase activi…	5975 // carbohydrate metabolism // inferred from electronic annotation /// 6952 // defense response // inferred from electronic annotation /// 9636 // response to toxin // inferred from electronic annotation /// 8152 // metabolism // inferred from electronic annotation	5759 // mitochondrial matrix // inferred from sequence or structural similarity /// 5777 // peroxisome // inferred from sequence or structural similarity /// 5759 // mitochondrial matrix // inferred from sequence similarity /// 5777 // peroxisome // inferred from sequence similarity	IPR000192 // Aminotransferase, class V // 3.0E-28
57	141256_at	0.783389	1.02833	9.60182	7.23704e-11	1.63479e-09	14.5082	FBgn0004698	CG8153	mus210	mutagen-sensitive 210	36697	3684 // damaged DNA binding // inferred from sequence or structural similarity /// 3677 // DNA binding // inferred from electronic annotation /// 3684 // damaged DNA binding // inferred from electronic annotation /// 3684 // damaged DNA binding // inferred from sequence similarity	6289 // nucleotide-excision repair // inferred from sequence or structural similarity /// 6281 // DNA repair // inferred from electronic annotation /// 6289 // nucleotide-excision repair // inferred from electronic annotation /// 6974 // response to DNA damage stimulus // inferred from electronic annotation /// 6289 // nucleotide-excision repair // inferred from sequence similarity	5634 // nucleus // non-traceable author statement /// 5634 // nucleus // inferred from electronic annotation	IPR004583 // DNA repair protein Rad4 // 1.0E-126 /// IPR004583 // DNA repair protein Rad4 // 1.0E-126 /// IPR004583 // DNA repair protein Rad4 // 1.0E-126
592	141791_at	1.26576	1.80372	9.60131	7.24629e-11	1.63479e-09	14.5069	FBgn0010379	CG4006	Akt1	Akt1	41957	4672 // protein kinase activity // inferred from direct assay /// 4674 // protein serine/threonine kinase activity // inferred from mutant phenotype /// 4674 // protein serine/threonine kinase activity // inferred from sequence or structural similarity /// 4674 // protein serine/threonine kinase activity // non-traceable author statement /// 4702 // receptor signaling protein serine/threonine kin…	6468 // protein amino acid phosphorylation // non-traceable author statement /// 6916 // anti-apoptosis // inferred from mutant phenotype /// 7424 // tracheal system development (sensu Insecta) // inferred from mutant phenotype /// 7424 // tracheal system development (sensu Insecta) // traceable author statement /// 8286 // insulin receptor signaling pathway // non-traceable author statement /// …	5886 // plasma membrane // non-traceable author statement /// 16020 // membrane // inferred from electronic annotation	IPR000719 // Protein kinase // 3.6E-100 /// IPR001849 // Pleckstrin-like // 2.5E-25 /// IPR000961 // Protein kinase C-terminal domain // 1.6E-19 /// IPR000719 // Protein kinase // 3.6E-100 /// IPR001849 // Pleckstrin-like // 2.5E-25 /// IPR000961 // Protein kinase C-terminal domain // 1.6E-19
10635	151834_at	1.67977	3.33199	9.59392	7.37962e-11	1.66219e-09	14.4884	FBgn0052130	CG32130	CG32130	CG32130	39518	4263 // chymotrypsin activity // inferred from electronic annotation /// 4295 // trypsin activity // inferred from electronic annotation /// 5515 // protein binding // inferred from electronic annotation /// 5515 // protein binding // inferred from physical interaction /// 4252 // serine-type endopeptidase activity // inferred from electronic annotation /// 8233 // peptidase activity // inferred …	6508 // proteolysis // inferred from electronic annotation /// 6915 // apoptosis // inferred from electronic annotation	---	IPR003103 // Apoptosis regulator Bcl-2 protein, BAG // 1.4E-17 /// IPR003103 // Apoptosis regulator Bcl-2 protein, BAG // 1.4E-17 /// IPR003103 // Apoptosis regulator Bcl-2 protein, BAG // 1.4E-17
13134	154333_at	0.791407	2.91173	9.58874	7.47446e-11	1.68085e-09	14.4755	FBgn0000634	CG6588	Fas1	Fasciclin 1	42025	50839 // cell adhesion molecule binding // inferred from direct assay /// 5515 // protein binding // inferred from electronic annotation	7156 // homophilic cell adhesion // inferred from direct assay /// 7158 // neuron adhesion // inferred from sequence or structural similarity /// 7158 // neuron adhesion // non-traceable author statement /// 7411 // axon guidance // inferred from genetic interaction /// 7411 // axon guidance // non-traceable author statement /// 8038 // neuron recognition // inferred from direct assay /// 8038 //…	5886 // plasma membrane // inferred from direct assay /// 5886 // plasma membrane // non-traceable author statement /// 16020 // membrane // inferred from electronic annotation	IPR000782 // Beta-Ig-H3/fasciclin // 5.7E-6 /// IPR000782 // Beta-Ig-H3/fasciclin // 7.3E-7 /// IPR000782 // Beta-Ig-H3/fasciclin // 4.9E-21 /// IPR000782 // Beta-Ig-H3/fasciclin // 7.3E-7 /// IPR000782 // Beta-Ig-H3/fasciclin // 4.9E-21 /// IPR000782 // Beta-Ig-H3/fasciclin // 7.3E-7 /// IPR000782 // Beta-Ig-H3/fasciclin // 4.9E-21
9192	150391_at	0.557489	0.734727	9.55913	8.04175e-11	1.79976e-09	14.4015	FBgn0039003	CG4917	wfs1	wolfram syndrome 1	42679	4357 // glutamate-cysteine ligase activity // inferred from sequence or structural similarity /// 4357 // glutamate-cysteine ligase activity // inferred from sequence similarity	7601 // visual perception // inferred from electronic annotation /// 7605 // sensory perception of sound // inferred from electronic annotation	17109 // glutamate-cysteine ligase complex // inferred from sequence or structural similarity /// 17109 // glutamate-cysteine ligase complex // inferred from sequence similarity	---
12945	154144_at	0.667484	1.73107	9.55431	8.13821e-11	1.81844e-09	14.3895	FBgn0030142	CG3004	CG3004	CG3004	31903	3729 // mRNA binding // inferred from electronic annotation /// 3924 // GTPase activity // inferred from sequence or structural similarity /// 5515 // protein binding // inferred from physical interaction /// 3924 // GTPase activity // inferred from sequence similarity	16072 // rRNA metabolism // inferred from electronic annotation	5834 // heterotrimeric G-protein complex // inferred from sequence or structural similarity /// 5834 // heterotrimeric G-protein complex // inferred from sequence similarity	IPR001680 // G-protein beta WD-40 repeat // 0.0018 /// IPR001680 // G-protein beta WD-40 repeat // 0.1 /// IPR001680 // G-protein beta WD-40 repeat // 7.1E-6 /// IPR001680 // G-protein beta WD-40 repeat // 2.5E-4 /// IPR001680 // G-protein beta WD-40 repeat // 0.0042 /// IPR001680 // G-protein beta WD-40 repeat // 1.5E-9 /// IPR001680 // G-protein beta WD-40 repeat // 9.4E-6
8141	149340_at	0.705592	1.20274	9.54007	8.42995e-11	1.87466e-09	14.3538	FBgn0037345	CG2948	rev7	rev7	40677	5515 // protein binding // inferred from physical interaction	---	---	IPR003511 // DNA-binding HORMA // 1.0E-60
13137	154336_at	0.920585	2.14733	9.53479	8.541e-11	1.89635e-09	14.3406	FBgn0000084 /// FBgn0053491 /// FBgn0053498 /// FBgn0053487 /// FBgn0053496	CG9579 /// CG33491 /// CG33496 /// CG33487 /// CG33498	AnnX /// CG33491 /// CG33498 /// CG33487 /// CG33496	Annexin X /// CG33491 /// CG33498 /// CG33487 /// CG33496	2768884 /// 2768885 /// 2768887 /// 2768894 /// 33019	3779 // actin binding // inferred from sequence or structural similarity /// 5509 // calcium ion binding // inferred from sequence or structural similarity /// 5509 // calcium ion binding // non-traceable author statement /// 5543 // phospholipid binding // inferred from sequence or structural similarity /// 5543 // phospholipid binding // non-traceable author statement /// 5544 // calcium-depend…	6629 // lipid metabolism // inferred from electronic annotation /// 6886 // intracellular protein transport // inferred from electronic annotation /// 6887 // exocytosis // inferred from electronic annotation /// 6897 // endocytosis // inferred from electronic annotation /// 6952 // defense response // inferred from electronic annotation /// 50819 // negative regulation of coagulation // inferred…	---	IPR001464 // Annexin // 3.0E-10 /// IPR001464 // Annexin // 1.8E-30 /// IPR001464 // Annexin // 2.0E-30 /// IPR001464 // Annexin // 7.7E-29 /// IPR001464 // Annexin // 1.4E-29 /// IPR001464 // Annexin // 8.3E-26 /// IPR001464 // Annexin // 1.4E-21 /// IPR001464 // Annexin // 1.8E-30
412	141611_at	0.669791	1.79748	9.51646	8.93759e-11	1.9719e-09	14.2947	FBgn0037373	CG2095	CG2095	CG2095	40712	5515 // protein binding // inferred from physical interaction	6886 // intracellular protein transport // inferred from electronic annotation /// 6887 // exocytosis // inferred from electronic annotation /// 6904 // vesicle docking during exocytosis // inferred from electronic annotation /// 15031 // protein transport // inferred from electronic annotation /// 6810 // transport // inferred from electronic annotation	145 // exocyst // inferred from electronic annotation	IPR004172 // L27 domain // 9.5E-15 /// IPR007191 // Sec8 exocyst complex component specific domain // 1.4E-81
13160	154359_at	0.550954	2.19727	9.51034	9.07413e-11	1.99888e-09	14.2794	FBgn0031298	CG4428	Atg4	Autophagy-specific gene 4	33283	4197 // cysteine-type endopeptidase activity // inferred from sequence or structural similarity /// 5515 // protein binding // inferred from physical interaction /// 4197 // cysteine-type endopeptidase activity // inferred from sequence similarity	---	---	IPR005078 // Peptidase C54 // 1.0E-126
12819	154018_at	0.750599	3.30513	9.48785	9.59469e-11	2.10034e-09	14.2229	FBgn0027525	CG7686	CG7686	CG7686	36146	---	---	---	IPR007307 // Low temperature viability protein // 1.0E-126
12601	153800_at	0.720756	0.895365	9.47005	1.00283e-10	2.18501e-09	14.1782	FBgn0010083	CG5352	SmB	Small ribonucleoprotein particle protein B	34426	31202 // RNA splicing factor activity, transesterification mechanism // inferred from sequence or structural similarity /// 5515 // protein binding // inferred from physical interaction /// 3723 // RNA binding // inferred from electronic annotation /// 31202 // RNA splicing factor activity, transesterification mechanism // inferred from sequence similarity	398 // nuclear mRNA splicing, via spliceosome // inferred from sequence or structural similarity /// 16070 // RNA metabolism // non-traceable author statement /// 6397 // mRNA processing // inferred from electronic annotation /// 398 // nuclear mRNA splicing, via spliceosome // inferred from sequence similarity	5634 // nucleus // non-traceable author statement /// 5681 // spliceosome complex // inferred from sequence or structural similarity /// 5732 // small nucleolar ribonucleoprotein complex // inferred from electronic annotation /// 30532 // small nuclear ribonucleoprotein complex // inferred from sequence or structural similarity /// 30532 // small nuclear ribonucleoprotein complex // non-traceable…	IPR001163 // Small nuclear ribonucleoprotein (Sm protein) // 2.0E-22
1557	142756_at	2.16324	2.57256	9.4483	1.05853e-10	2.29566e-09	14.1236	FBgn0030263	CG2076	CG2076	CG2076	32041	---	---	---	---
7831	149030_at	0.720066	0.291451	9.44161	1.0763e-10	2.32699e-09	14.1067	FBgn0036844	CG14080	Mkp3	Mitogen-activated protein kinase phosphatase 3	40081	8138 // protein tyrosine/serine/threonine phosphatase activity // inferred from sequence or structural similarity /// 8138 // protein tyrosine/serine/threonine phosphatase activity // non-traceable author statement /// 16791 // phosphoric monoester hydrolase activity // inferred from direct assay /// 17017 // MAP kinase phosphatase activity // inferred from sequence or structural similarity /// 1…	165 // MAPKKK cascade // inferred from electronic annotation /// 6096 // glycolysis // inferred from electronic annotation /// 6470 // protein amino acid dephosphorylation // inferred from direct assay /// 6470 // protein amino acid dephosphorylation // non-traceable author statement /// 6470 // protein amino acid dephosphorylation // inferred from electronic annotation	5737 // cytoplasm // inferred from direct assay	IPR001763 // Rhodanese-like // 1.5E-9 /// IPR000340 // Dual specificity protein phosphatase // 1.2E-58
452	141651_at	0.558166	1.07056	9.42413	1.12415e-10	2.4267e-09	14.0627	FBgn0034641	CG10080	CG10080	CG10080	37462	5488 // binding // inferred from electronic annotation	---	---	---
10700	151899_at	1.40424	3.39059	9.41714	1.1439e-10	2.46176e-09	14.0451	FBgn0036992	CG11796	CG11796	CG11796	40263	3868 // 4-hydroxyphenylpyruvate dioxygenase activity // inferred from sequence or structural similarity /// 5515 // protein binding // inferred from physical interaction /// 3868 // 4-hydroxyphenylpyruvate dioxygenase activity // inferred from electronic annotation /// 3868 // 4-hydroxyphenylpyruvate dioxygenase activity // inferred from sequence similarity	9063 // amino acid catabolism // inferred from electronic annotation /// 9072 // aromatic amino acid family metabolism // inferred from electronic annotation	---	IPR004360 // Glyoxalase/Bleomycin resistance protein/dioxygenase domain // 1.9E-17 /// IPR004360 // Glyoxalase/Bleomycin resistance protein/dioxygenase domain // 1.9E-17
5860	147059_s_at	1.13773	0.887899	9.4037	1.18285e-10	2.53778e-09	14.0113	---	---	---	---	---	---	---	---	---
13098	154297_at	0.939103	1.47655	9.39595	1.20594e-10	2.57942e-09	13.9917	FBgn0032467	CG9934	CG9934	CG9934	34699	4842 // ubiquitin-protein ligase activity // inferred from electronic annotation /// 5515 // protein binding // inferred from physical interaction	6511 // ubiquitin-dependent protein catabolism // inferred from sequence or structural similarity /// 6950 // response to stress // inferred from electronic annotation /// 6952 // defense response // inferred from electronic annotation /// 16567 // protein ubiquitination // inferred from electronic annotation /// 6511 // ubiquitin-dependent protein catabolism // inferred from sequence similarity	151 // ubiquitin ligase complex // inferred from electronic annotation	IPR003613 // Zn-finger, modified RING // 1.3E-58
1327	142526_at	0.605926	0.470085	9.38693	1.23337e-10	2.62606e-09	13.969	FBgn0050389	CG30389	CG30389	CG30389	37410	---	---	---	---
5571	146770_at	0.608298	1.49516	9.37781	1.26177e-10	2.68027e-09	13.9459	FBgn0033225	CG1550	CG1550	CG1550	35732	4835 // tubulin-tyrosine ligase activity // inferred from sequence or structural similarity /// 5515 // protein binding // inferred from physical interaction /// 4835 // tubulin-tyrosine ligase activity // inferred from electronic annotation /// 4835 // tubulin-tyrosine ligase activity // inferred from sequence similarity	6464 // protein modification // inferred from electronic annotation	---	IPR004344 // Tubulin-tyrosine ligase // 1.9E-123
10789	151988_at	0.504202	2.27512	9.3771	1.26402e-10	2.68027e-09	13.9441	FBgn0037647	CG11968	CG11968	CG11968	41071	3924 // GTPase activity // inferred from sequence or structural similarity /// 5515 // protein binding // inferred from physical interaction /// 3924 // GTPase activity // inferred from sequence similarity	7186 // G-protein coupled receptor protein signaling pathway // inferred from electronic annotation /// 50875 // cellular physiological process // inferred from electronic annotation	5634 // nucleus // inferred from electronic annotation /// 5737 // cytoplasm // inferred from electronic annotation	IPR006762 // Gtr1/RagA G protein // 2.4E-120
9839	151038_at	1.5178	2.08429	9.35925	1.32164e-10	2.797e-09	13.899	FBgn0040551	CG11686	CG11686	CG11686	50024	---	---	---	---
2536	143735_at	0.730486	3.405	9.35711	1.32872e-10	2.80352e-09	13.8936	FBgn0013987	CG3086	MAPk-Ak2	MAP kinase activated protein-kinase-2	44573	4672 // protein kinase activity // inferred from sequence or structural similarity /// 4674 // protein serine/threonine kinase activity // inferred from sequence or structural similarity /// 4674 // protein serine/threonine kinase activity // non-traceable author statement /// 4702 // receptor signaling protein serine/threonine kinase activity // inferred from electronic annotation /// 5524 // AT…	165 // MAPKKK cascade // inferred from electronic annotation /// 6468 // protein amino acid phosphorylation // inferred from sequence or structural similarity /// 6468 // protein amino acid phosphorylation // non-traceable author statement /// 6950 // response to stress // inferred from electronic annotation /// 6952 // defense response // inferred from electronic annotation /// 7155 // cell adhe…	---	IPR000719 // Protein kinase // 3.5E-83
13277	154476_at	0.693985	0.2151	9.35359	1.34045e-10	2.82401e-09	13.8848	FBgn0031052	CG14215	CG14215	CG14215	32971	16740 // transferase activity // inferred from electronic annotation	8152 // metabolism // inferred from electronic annotation	---	---
7883	149082_at	0.737702	0.696033	9.3468	1.36341e-10	2.86378e-09	13.8676	FBgn0036924	CG7570	hale	hale-bopp	40183	5515 // protein binding // inferred from physical interaction	---	---	---
5065	146264_s_at	2.24896	1.67561	9.33932	1.38915e-10	2.91347e-09	13.8487	FBgn0051864 /// FBgn0032393	CG31864 /// CG12264	CG31864 /// CG12264	CG31864 /// CG12264	318990 /// 34613	4123 // cystathionine gamma-lyase activity // inferred from sequence or structural similarity /// 4123 // cystathionine gamma-lyase activity // non-traceable author statement /// 8483 // transaminase activity // inferred from electronic annotation /// 16740 // transferase activity // inferred from electronic annotation /// 31071 // cysteine desulfurase activity // inferred from electronic annotat…	6523 // alanine biosynthesis // inferred from sequence or structural similarity /// 16226 // iron-sulfur cluster assembly // inferred from sequence or structural similarity /// 16226 // iron-sulfur cluster assembly // non-traceable author statement /// 19740 // nitrogen utilization // inferred from electronic annotation /// 8152 // metabolism // inferred from electronic annotation /// 6523 // ala…	5737 // cytoplasm // inferred from sequence or structural similarity /// 5739 // mitochondrion // inferred from sequence or structural similarity /// 5739 // mitochondrion // non-traceable author statement /// 5739 // mitochondrion // inferred from electronic annotation /// 5737 // cytoplasm // inferred from sequence similarity /// 5739 // mitochondrion // inferred from sequence similarity	IPR000192 // Aminotransferase, class V // 1.0E-126
7460	148659_at	1.12992	1.59183	9.33065	1.41962e-10	2.96848e-09	13.8267	FBgn0036285	CG10704	toe	twin of eyg	39418	3700 // transcription factor activity // inferred from sequence or structural similarity /// 5515 // protein binding // inferred from physical interaction /// 3677 // DNA binding // inferred from electronic annotation /// 3700 // transcription factor activity // inferred from electronic annotation /// 43565 // sequence-specific DNA binding // inferred from electronic annotation /// 3700 // transc…	6357 // regulation of transcription from RNA polymerase II promoter // inferred from electronic annotation /// 7398 // ectoderm development // inferred from electronic annotation /// 7399 // nervous system development // inferred from electronic annotation /// 8283 // cell proliferation // inferred from electronic annotation /// 45449 // regulation of transcription // inferred from sequence or st…	5634 // nucleus // inferred from sequence or structural similarity /// 5667 // transcription factor complex // inferred from sequence or structural similarity /// 5634 // nucleus // inferred from electronic annotation /// 5634 // nucleus // inferred from sequence similarity /// 5667 // transcription factor complex // inferred from sequence similarity	IPR001523 // Paired box protein, N-terminal // 2.3E-36 /// IPR001356 // Homeobox // 3.9E-32
10357	151556_s_at	0.683182	0.806685	9.31747	1.46722e-10	3.06345e-09	13.7934	FBgn0028542	CG33115	CG33115	CG33115	34814	5198 // structural molecule activity // inferred from electronic annotation /// 17147 // Wnt-protein binding // inferred from sequence or structural similarity /// 5515 // protein binding // inferred from physical interaction /// 17147 // Wnt-protein binding // inferred from sequence similarity	16055 // Wnt receptor signaling pathway // inferred from sequence or structural similarity /// 16055 // Wnt receptor signaling pathway // inferred from sequence similarity	---	---
5058	146257_at	1.21857	2.71534	9.30518	1.51311e-10	3.14988e-09	13.7622	FBgn0032382	CG14935	CG14935	CG14935	34598	4556 // alpha-amylase activity // inferred from electronic annotation /// 4558 // alpha-glucosidase activity // inferred from sequence or structural similarity /// 5215 // transporter activity // inferred from electronic annotation /// 4558 // alpha-glucosidase activity // inferred from sequence similarity	5975 // carbohydrate metabolism // inferred from electronic annotation	---	IPR006047 // Alpha amylase, catalytic domain // 3.7E-113 /// IPR006047 // Alpha amylase, catalytic domain // 3.7E-113
10494	151693_s_at	0.539139	1.58098	9.29908	1.53643e-10	3.18894e-09	13.7468	FBgn0051301	CG31301	CG31301	CG31301	41865	3676 // nucleic acid binding // inferred from electronic annotation /// 3725 // double-stranded RNA binding // inferred from electronic annotation	---	5622 // intracellular // inferred from electronic annotation	IPR000467 // D111/G-patch domain // 1.4E-9 /// IPR001374 // Single-stranded nucleic acid binding R3H // 2.1E-16
10462	151661_s_at	0.6074	1.57611	9.27437	1.63467e-10	3.37783e-09	13.6841	FBgn0004108	CG9704	Nrt	Neurotactin	39873	3824 // catalytic activity // inferred from electronic annotation /// 5515 // protein binding // inferred from electronic annotation	7155 // cell adhesion // inferred from electronic annotation /// 7398 // ectoderm development // inferred from electronic annotation /// 7399 // nervous system development // inferred from electronic annotation /// 7409 // axonogenesis // inferred from mutant phenotype /// 7411 // axon guidance // inferred from mutant phenotype /// 7413 // axonal fasciculation // inferred from mutant phenotype //…	5886 // plasma membrane // inferred from direct assay /// 5886 // plasma membrane // inferred from sequence or structural similarity /// 16021 // integral to membrane // non-traceable author statement /// 16323 // basolateral plasma membrane // non-traceable author statement /// 16020 // membrane // inferred from electronic annotation /// 16021 // integral to membrane // inferred from electronic …	IPR002018 // Carboxylesterase, type B // 1.2E-104
11428	152627_at	0.733703	0.421771	9.2608	1.69129e-10	3.48456e-09	13.6496	FBgn0030052	CG12065	CG12065	CG12065	31798	3677 // DNA binding // inferred from electronic annotation	---	5634 // nucleus // inferred from electronic annotation	---
1645	142844_at	0.713924	2.04601	9.24965	1.73935e-10	3.57306e-09	13.6213	FBgn0034372	CG5469	Gint3	GDI interacting protein 3	37148	5515 // protein binding // inferred from physical interaction	---	---	IPR001012 // UBX domain // 1.3E-8
12275	153474_at	0.708044	2.43963	9.24502	1.75973e-10	3.59385e-09	13.6095	FBgn0036257	CG6811	RhoGAP68F	RhoGAP68F	39385	5085 // guanyl-nucleotide exchange factor activity // inferred from electronic annotation /// 5100 // Rho GTPase activator activity // inferred from sequence or structural similarity /// 5102 // receptor binding // inferred from electronic annotation /// 5515 // protein binding // inferred from physical interaction /// 5100 // Rho GTPase activator activity // inferred from sequence similarity	6928 // cell motility // inferred from electronic annotation /// 7010 // cytoskeleton organization and biogenesis // inferred from electronic annotation /// 7242 // intracellular signaling cascade // inferred from electronic annotation	---	IPR000198 // RhoGAP domain // 8.0E-66
8020	149219_at	0.463402	1.26898	9.22911	1.83154e-10	3.70272e-09	13.5691	FBgn0037147	CG7140	CG7140	CG7140	40445	4345 // glucose-6-phosphate 1-dehydrogenase activity // inferred from sequence or structural similarity /// 4345 // glucose-6-phosphate 1-dehydrogenase activity // inferred from electronic annotation /// 16491 // oxidoreductase activity // inferred from electronic annotation /// 4345 // glucose-6-phosphate 1-dehydrogenase activity // inferred from sequence similarity	5996 // monosaccharide metabolism // inferred from electronic annotation /// 6006 // glucose metabolism // inferred from electronic annotation /// 5975 // carbohydrate metabolism // inferred from electronic annotation	---	IPR001282 // Glucose-6-phosphate dehydrogenase // 1.4E-76 /// IPR001282 // Glucose-6-phosphate dehydrogenase // 1.0E-65
12137	153336_at	0.988928	2.8488	9.22076	1.87045e-10	3.77593e-09	13.5478	FBgn0002069	CG3821	Aats-asp	Aspartyl-tRNA synthetase	36420	3729 // mRNA binding // inferred from electronic annotation /// 4815 // aspartate-tRNA ligase activity // inferred from sequence or structural similarity /// 5524 // ATP binding // inferred from electronic annotation /// 5515 // protein binding // inferred from physical interaction /// 3676 // nucleic acid binding // inferred from electronic annotation /// 4812 // aminoacyl-tRNA ligase activity /…	6422 // aspartyl-tRNA aminoacylation // inferred from sequence or structural similarity /// 40007 // growth // inferred from mutant phenotype /// 6418 // tRNA aminoacylation for protein translation // inferred from electronic annotation /// 6422 // aspartyl-tRNA aminoacylation // inferred from electronic annotation /// 6422 // aspartyl-tRNA aminoacylation // inferred from sequence similarity	5737 // cytoplasm // inferred from electronic annotation	IPR004365 // OB-fold nucleic acid binding domain // 3.7E-14 /// IPR004364 // tRNA synthetase, class II (D, K and N) // 1.0E-126
12193	153392_at	0.73584	3.12174	9.20744	1.93423e-10	3.89908e-09	13.5139	FBgn0042174	CG18854	CG18854	CG18854	59212	8440 // inositol trisphosphate 3-kinase activity // inferred from sequence or structural similarity /// 8440 // inositol trisphosphate 3-kinase activity // non-traceable author statement /// 5515 // protein binding // inferred from physical interaction /// 8440 // inositol trisphosphate 3-kinase activity // inferred from sequence similarity	---	---	---
8314	149513_at	0.570407	1.30609	9.16103	2.17439e-10	4.33332e-09	13.3956	FBgn0037603	CG11753	CG11753	CG11753	41023	5515 // protein binding // inferred from physical interaction	---	---	---
3029	144228_at	0.492965	0.765586	9.15957	2.1824e-10	4.3431e-09	13.3919	FBgn0028527	CG18507	CG18507	CG18507	34775	---	---	---	---
284	141483_at	1.4205	3.26242	9.13061	2.34806e-10	4.6648e-09	13.3179	FBgn0038661	CG17836	CG17836	CG17836	42267	3677 // DNA binding // inferred from electronic annotation /// 46983 // protein dimerization activity // inferred from sequence or structural similarity /// 46983 // protein dimerization activity // inferred from sequence similarity	6355 // regulation of transcription, DNA-dependent // inferred from electronic annotation /// 50875 // cellular physiological process // inferred from mutant phenotype	5634 // nucleus // inferred from electronic annotation	---
3683	144882_at	0.914247	0.747973	9.12862	2.3599e-10	4.67641e-09	13.3128	FBgn0030310	CG11709	PGRP-SA	Peptidoglycan recognition protein SA	32099	8329 // pattern recognition receptor activity // traceable author statement /// 8745 // N-acetylmuramoyl-L-alanine amidase activity // inferred from electronic annotation /// 16019 // peptidoglycan receptor activity // inferred from sequence or structural similarity /// 16019 // peptidoglycan receptor activity // non-traceable author statement /// 16019 // peptidoglycan receptor activity // trace…	6952 // defense response // non-traceable author statement /// 6955 // immune response // inferred from sequence or structural similarity /// 6955 // immune response // traceable author statement /// 6965 // anti-Gram-positive bacterial polypeptide induction // inferred from mutant phenotype /// 6965 // anti-Gram-positive bacterial polypeptide induction // traceable author statement /// 8063 // T…	5576 // extracellular region // inferred from direct assay /// 5576 // extracellular region // inferred from sequence or structural similarity /// 5887 // integral to plasma membrane // non-traceable author statement /// 5576 // extracellular region // inferred from sequence similarity	IPR002502 // N-acetylmuramoyl-L-alanine amidase, family 2 // 1.1E-64
1227	142426_at	0.46801	0.69871	9.12414	2.38679e-10	4.72266e-09	13.3013	FBgn0031850	CG11326	Tsp	Thrombospondin	33941	5198 // structural molecule activity // inferred from electronic annotation /// 5509 // calcium ion binding // inferred from electronic annotation /// 5515 // protein binding // inferred from physical interaction	7155 // cell adhesion // inferred from electronic annotation /// 7155 // cell adhesion // inferred from sequence or structural similarity /// 7155 // cell adhesion // inferred from sequence similarity	5578 // extracellular matrix (sensu Metazoa) // inferred from sequence or structural similarity /// 16020 // membrane // inferred from electronic annotation /// 5576 // extracellular region // inferred from electronic annotation /// 5578 // extracellular matrix (sensu Metazoa) // inferred from sequence similarity	IPR006209 // EGF-like domain // 3.8E-5 /// IPR003367 // Thrombospondin type 3 repeat // 13.0 /// IPR003367 // Thrombospondin type 3 repeat // 0.045 /// IPR003367 // Thrombospondin type 3 repeat // 0.71 /// IPR003367 // Thrombospondin type 3 repeat // 0.0021 /// IPR003367 // Thrombospondin type 3 repeat // 0.0026 /// IPR003367 // Thrombospondin type 3 repeat // 0.12 /// IPR003367 // Thrombospondin…
351	141550_at	1.15574	1.53764	9.11536	2.44045e-10	4.80206e-09	13.2789	FBgn0034936	CG2970	CG2970	CG2970	37807	5200 // structural constituent of cytoskeleton // inferred from electronic annotation	7010 // cytoskeleton organization and biogenesis // inferred from electronic annotation	16020 // membrane // inferred from electronic annotation	IPR001107 // Band 7 protein // 1.5E-75
2844	144043_at	0.65237	0.628693	9.1161	2.43588e-10	4.80206e-09	13.2807	FBgn0024992	CG2658	CG2658	CG2658	31253	166 // nucleotide binding // inferred from electronic annotation /// 4222 // metalloendopeptidase activity // inferred from electronic annotation /// 5524 // ATP binding // inferred from electronic annotation /// 8237 // metallopeptidase activity // inferred from sequence or structural similarity /// 16887 // ATPase activity // inferred from sequence or structural similarity /// 8270 // zinc ion …	6508 // proteolysis // inferred from sequence or structural similarity /// 6510 // ATP-dependent proteolysis // inferred from sequence or structural similarity /// 7067 // mitosis // inferred from electronic annotation /// 6508 // proteolysis // inferred from sequence similarity /// 6510 // ATP-dependent proteolysis // inferred from sequence similarity	5739 // mitochondrion // inferred from sequence or structural similarity /// 16020 // membrane // inferred from electronic annotation /// 16021 // integral to membrane // inferred from electronic annotation /// 5739 // mitochondrion // inferred from sequence similarity	IPR003959 // AAA ATPase, central region // 1.8E-54 /// IPR005936 // Peptidase M41, FtsH // 8.1E-39 /// IPR000642 // Peptidase M41 // 2.9E-121 /// IPR003959 // AAA ATPase, central region // 1.5E-89
13052	154251_at	0.669324	2.71975	9.11325	2.45349e-10	4.82095e-09	13.2735	FBgn0028388	---	capt	capulet	---	---	902 // cellular morphogenesis // inferred from mutant phenotype /// 7015 // actin filament organization // inferred from mutant phenotype /// 7456 // eye development (sensu Endopterygota) // inferred from mutant phenotype /// 8103 // oocyte microtubule cytoskeleton polarization // inferred from mutant phenotype /// 8154 // actin polymerization and/or depolymerization // inferred from mutant pheno…	16020 // membrane // inferred from electronic annotation	---
5674	146873_at	0.786229	2.48895	9.11166	2.46339e-10	4.83129e-09	13.2694	FBgn0033397	CG10843	Cyp4p3	Cyp4p3	35948	4497 // monooxygenase activity // inferred from electronic annotation /// 16491 // oxidoreductase activity // inferred from electronic annotation /// 5506 // iron ion binding // inferred from electronic annotation /// 20037 // heme binding // inferred from electronic annotation /// 46872 // metal ion binding // inferred from electronic annotation	6118 // electron transport // inferred from electronic annotation /// 8202 // steroid metabolism // inferred from electronic annotation	5792 // microsome // non-traceable author statement /// 16020 // membrane // non-traceable author statement /// 5783 // endoplasmic reticulum // inferred from electronic annotation /// 5792 // microsome // inferred from electronic annotation /// 16020 // membrane // inferred from electronic annotation	IPR001128 // Cytochrome P450 // 3.6E-92
9539	150738_at	0.527557	0.315065	9.1113	2.46565e-10	4.83129e-09	13.2685	FBgn0039527	CG5639	CG5639	CG5639	43314	4867 // serine-type endopeptidase inhibitor activity // inferred from electronic annotation	---	---	IPR004094 // Antistasin // 1.5E-6 /// IPR004094 // Antistasin // 4.0E-13 /// IPR004094 // Antistasin // 8.8E-7 /// IPR004094 // Antistasin // 2.6E-10 /// IPR000716 // Thyroglobulin type-1 // 3.7E-11 /// IPR000716 // Thyroglobulin type-1 // 9.3E-8 /// IPR000716 // Thyroglobulin type-1 // 1.2E-7 /// IPR000716 // Thyroglobulin type-1 // 2.7E-7 /// IPR008197 // Whey acidic protein, core region // 1.4…
2100	143299_at	1.48848	5.8616	9.10348	2.51495e-10	4.92101e-09	13.2484	FBgn0003067	CG17725	Pepck	Phosphoenolpyruvate carboxykinase	37131	4613 // phosphoenolpyruvate carboxykinase (GTP) activity // inferred from sequence or structural similarity /// 5525 // GTP binding // inferred from electronic annotation /// 166 // nucleotide binding // inferred from electronic annotation /// 4611 // phosphoenolpyruvate carboxykinase activity // inferred from electronic annotation /// 4613 // phosphoenolpyruvate carboxykinase (GTP) activity // i…	6094 // gluconeogenesis // inferred from sequence or structural similarity /// 6094 // gluconeogenesis // non-traceable author statement /// 6094 // gluconeogenesis // inferred from electronic annotation /// 6094 // gluconeogenesis // inferred from sequence similarity	5739 // mitochondrion // inferred from sequence or structural similarity /// 5739 // mitochondrion // inferred from sequence similarity	IPR008209 // Phosphoenolpyruvate carboxykinase (GTP) // 1.0E-126 /// IPR008209 // Phosphoenolpyruvate carboxykinase (GTP) // 1.0E-126
1506	142705_at	0.689113	3.44765	9.09698	2.55668e-10	4.99568e-09	13.2318	FBgn0002284	CG4097	Pros26	Proteasome 26kD subunit	39855	4175 // endopeptidase activity // inferred from sequence or structural similarity /// 4175 // endopeptidase activity // non-traceable author statement /// 5515 // protein binding // inferred from physical interaction /// 4175 // endopeptidase activity // inferred from electronic annotation /// 4298 // threonine endopeptidase activity // inferred from electronic annotation /// 8233 // peptidase ac…	6510 // ATP-dependent proteolysis // non-traceable author statement /// 6511 // ubiquitin-dependent protein catabolism // non-traceable author statement /// 6511 // ubiquitin-dependent protein catabolism // inferred from electronic annotation	502 // proteasome complex (sensu Eukaryota) // non-traceable author statement /// 5839 // proteasome core complex (sensu Eukaryota) // inferred from sequence or structural similarity /// 5839 // proteasome core complex (sensu Eukaryota) // non-traceable author statement /// 5829 // cytosol // inferred from electronic annotation /// 5839 // proteasome core complex (sensu Eukaryota) // inferred fro…	IPR001353 // Peptidase T1, 20S proteasome // 1.4E-38
6746	147945_at	0.504272	-0.148469	9.08887	2.60979e-10	5.09237e-09	13.211	FBgn0035168	CG13889	CG13889	CG13889	38099	4601 // peroxidase activity // inferred from electronic annotation /// 5200 // structural constituent of cytoskeleton // inferred from electronic annotation	6979 // response to oxidative stress // inferred from electronic annotation	---	---
8656	149855_at	0.670099	1.74254	9.08335	2.64655e-10	5.14261e-09	13.1969	FBgn0038172	CG9621	Adgf-D	Adenosine deaminase-related growth factor D	41679	4000 // adenosine deaminase activity // inferred from direct assay /// 8083 // growth factor activity // inferred from direct assay /// 19239 // deaminase activity // inferred from electronic annotation	8283 // cell proliferation // inferred from direct assay /// 9168 // purine ribonucleoside monophosphate biosynthesis // inferred from electronic annotation	5615 // extracellular space // non-traceable author statement	IPR001365 // Adenosine/AMP deaminase // 1.3E-47
10741	151940_at	0.716491	2.00936	9.03849	2.96568e-10	5.69947e-09	13.0818	FBgn0034844	CG9861	CG9861	CG9861	37692	---	---	---	---
4077	145276_at	0.62647	1.9771	9.03465	2.99471e-10	5.74468e-09	13.0719	FBgn0030894	CG7192	CG7192	CG7192	32791	---	---	---	---
4184	145383_at	1.02541	1.16958	9.0343	2.9974e-10	5.74468e-09	13.071	FBgn0031047	CG14213	CG14213	CG14213	32966	5515 // protein binding // inferred from physical interaction /// 5488 // binding // inferred from electronic annotation	30154 // cell differentiation // inferred from electronic annotation	---	IPR007216 // Cell differentiation proteins, Rcd1-like // 1.0E-126
6416	147615_at	0.947032	1.23958	9.02174	3.09463e-10	5.92293e-09	13.0387	FBgn0034611	CG10069	CG10069	CG10069	37427	15169 // glycerol-3-phosphate transporter activity // inferred from sequence or structural similarity /// 5215 // transporter activity // inferred from electronic annotation /// 15169 // glycerol-3-phosphate transporter activity // inferred from sequence similarity	5975 // carbohydrate metabolism // inferred from electronic annotation /// 6858 // extracellular transport // inferred from electronic annotation /// 8643 // carbohydrate transport // inferred from electronic annotation /// 6810 // transport // inferred from electronic annotation	16021 // integral to membrane // inferred from electronic annotation /// 16020 // membrane // inferred from electronic annotation	---
7868	149067_at	0.631709	0.280004	9.00006	3.27013e-10	6.24175e-09	12.983	FBgn0036897	CG8786	CG8786	CG8786	40144	5515 // protein binding // inferred from electronic annotation /// 8270 // zinc ion binding // inferred from electronic annotation /// 46872 // metal ion binding // inferred from electronic annotation	---	---	IPR001841 // Zn-finger, RING // 2.3E-7 /// IPR004170 // WWE domain // 2.5E-13
11448	152647_at	0.697347	2.30767	8.99418	3.31948e-10	6.31017e-09	12.9678	FBgn0042710	CG32849	Hex-t2	Hex-t2	43191	4396 // hexokinase activity // non-traceable author statement /// 5524 // ATP binding // inferred from electronic annotation /// 166 // nucleotide binding // inferred from electronic annotation /// 4396 // hexokinase activity // inferred from electronic annotation /// 16301 // kinase activity // inferred from electronic annotation /// 16740 // transferase activity // inferred from electronic anno…	6096 // glycolysis // non-traceable author statement /// 6096 // glycolysis // inferred from electronic annotation	---	IPR001312 // Hexokinase // 3.0E-90 /// IPR001312 // Hexokinase // 7.7E-99
3044	144243_at	0.61754	2.17855	8.98424	3.40459e-10	6.44571e-09	12.9422	FBgn0028983	CG10913	Spn6	Serine protease inhibitor 6	49803	4867 // serine-type endopeptidase inhibitor activity // inferred from sequence or structural similarity /// 4867 // serine-type endopeptidase inhibitor activity // non-traceable author statement /// 5515 // protein binding // inferred from physical interaction /// 4867 // serine-type endopeptidase inhibitor activity // inferred from electronic annotation /// 8233 // peptidase activity // inferred…	6508 // proteolysis // inferred from electronic annotation	---	IPR000215 // Serpin // 2.8E-108
5707	146906_at	0.553453	2.30353	8.98459	3.40155e-10	6.44571e-09	12.9431	FBgn0033452	CG1599	CG1599	CG1599	36015	5484 // SNAP receptor activity // non-traceable author statement /// 5485 // v-SNARE activity // non-traceable author statement	6886 // intracellular protein transport // Unknown /// 6886 // intracellular protein transport // inferred from electronic annotation /// 6810 // transport // inferred from electronic annotation /// 16192 // vesicle-mediated transport // inferred from electronic annotation /// 6886 // intracellular protein transport // inferred from curator	5886 // plasma membrane // inferred from sequence or structural similarity /// 16021 // integral to membrane // inferred from electronic annotation /// 5886 // plasma membrane // inferred from sequence similarity	IPR001388 // Synaptobrevin // 1.3E-36
12629	153828_at	0.88969	2.35909	8.96819	3.54675e-10	6.7058e-09	12.9009	FBgn0032136	CG15828	CG15828	CG15828	34283	5319 // lipid transporter activity // inferred from electronic annotation /// 8289 // lipid binding // inferred from sequence or structural similarity /// 8289 // lipid binding // inferred from sequence similarity	6869 // lipid transport // inferred from electronic annotation	5615 // extracellular space // inferred from sequence or structural similarity /// 5615 // extracellular space // inferred from sequence similarity	IPR009454 // Protein of unknown function DUF1081 // 2.7E-55 /// IPR001846 // von Willebrand factor, type D // 1.5E-10 /// IPR001747 // Lipid transport protein, N-terminal // 3.9E-120 /// IPR009454 // Protein of unknown function DUF1081 // 2.7E-55 /// IPR001846 // von Willebrand factor, type D // 1.5E-10 /// IPR001747 // Lipid transport protein, N-terminal // 1.0E-80 /// IPR001747 // Lipid transpo…
4221	145420_at	0.776112	1.46433	8.9608	3.61424e-10	6.81501e-09	12.8818	FBgn0031103	CG12679	CG12679	CG12679	33031	5515 // protein binding // inferred from physical interaction	---	---	---
11176	152375_at	0.734065	3.94338	8.95551	3.66335e-10	6.88907e-09	12.8682	FBgn0024211	CG3359	mfas	midline fasciclin	41455	---	7165 // signal transduction // inferred from electronic annotation /// 7398 // ectoderm development // inferred from electronic annotation /// 7409 // axonogenesis // inferred from mutant phenotype /// 16337 // cell-cell adhesion // inferred from electronic annotation /// 7155 // cell adhesion // inferred from electronic annotation	5886 // plasma membrane // non-traceable author statement	IPR000782 // Beta-Ig-H3/fasciclin // 8.4E-16 /// IPR000782 // Beta-Ig-H3/fasciclin // 3.4E-60 /// IPR000782 // Beta-Ig-H3/fasciclin // 8.4E-16 /// IPR000782 // Beta-Ig-H3/fasciclin // 3.4E-60 /// IPR000782 // Beta-Ig-H3/fasciclin // 8.4E-16 /// IPR000782 // Beta-Ig-H3/fasciclin // 3.4E-60 /// IPR000782 // Beta-Ig-H3/fasciclin // 8.4E-16 /// IPR000782 // Beta-Ig-H3/fasciclin // 3.4E-60 /// IPR0007…
63	141262_at	0.503915	0.917013	8.95247	3.69187e-10	6.9334e-09	12.8603	FBgn0038965	CG13852	mats	mob as tumor suppressor	42634	19207 // kinase regulator activity // inferred from electronic annotation /// 5515 // protein binding // inferred from physical interaction	910 // cytokinesis // inferred from electronic annotation /// 7049 // cell cycle // inferred from electronic annotation /// 7067 // mitosis // inferred from electronic annotation	---	IPR005301 // Mob1/phocein family // 8.6E-123
2237	143436_at	0.841872	4.64171	8.93715	3.83911e-10	7.19063e-09	12.8208	FBgn0004175	CG17935	Mst84Dd	Male-specific RNA 84Dd	40886	5506 // iron ion binding // inferred from electronic annotation	6118 // electron transport // inferred from electronic annotation /// 7275 // development // inferred from electronic annotation /// 7283 // spermatogenesis // inferred from electronic annotation /// 30154 // cell differentiation // inferred from electronic annotation	---	IPR005634 // Male specific sperm protein // 3.4E-18
3807	145006_at	1.93143	1.4802	8.93425	3.8677e-10	7.22486e-09	12.8133	FBgn0030482	CG1673	CG1673	CG1673	32297	4084 // branched-chain-amino-acid transaminase activity // inferred from sequence or structural similarity /// 3824 // catalytic activity // inferred from electronic annotation /// 4084 // branched-chain-amino-acid transaminase activity // inferred from electronic annotation /// 4084 // branched-chain-amino-acid transaminase activity // inferred from sequence similarity	9082 // branched chain family amino acid biosynthesis // inferred from sequence or structural similarity /// 8152 // metabolism // inferred from electronic annotation /// 9081 // branched chain family amino acid metabolism // inferred from electronic annotation /// 9082 // branched chain family amino acid biosynthesis // inferred from sequence similarity	5737 // cytoplasm // inferred from sequence or structural similarity /// 5739 // mitochondrion // inferred from sequence or structural similarity /// 5737 // cytoplasm // inferred from sequence similarity /// 5739 // mitochondrion // inferred from sequence similarity	IPR001544 // Aminotransferase, class IV // 4.9E-122
1442	142641_at	0.516878	0.495534	8.91706	4.04135e-10	7.52917e-09	12.7689	FBgn0031344	CG7420	CG7420	CG7420	33332	5083 // small GTPase regulator activity // inferred from electronic annotation /// 5085 // guanyl-nucleotide exchange factor activity // inferred from electronic annotation	6139 // nucleobase, nucleoside, nucleotide and nucleic acid metabolism // inferred from electronic annotation /// 6810 // transport // inferred from electronic annotation /// 15931 // nucleobase, nucleoside, nucleotide and nucleic acid transport // inferred from electronic annotation	---	IPR000408 // Regulator of chromosome condensation, RCC1 // 3.0E-5
11902	153101_at	0.792444	1.19407	8.90302	4.18913e-10	7.78378e-09	12.7326	FBgn0034648	CG15675	CG15675	CG15675	37469	---	---	---	---
10843	152042_at	0.691351	1.04585	8.89967	4.22516e-10	7.84033e-09	12.7239	FBgn0032032	CG17294	CG17294	CG17294	34155	3869 // 4-nitrophenylphosphatase activity // inferred from sequence or structural similarity /// 5515 // protein binding // inferred from physical interaction /// 3824 // catalytic activity // inferred from electronic annotation /// 16787 // hydrolase activity // inferred from electronic annotation /// 3869 // 4-nitrophenylphosphatase activity // inferred from sequence similarity	8152 // metabolism // inferred from electronic annotation	---	IPR005834 // Haloacid dehalogenase-like hydrolase // 5.4E-10
2896	144095_at	0.517681	2.47554	8.8718	4.53774e-10	8.40923e-09	12.6518	FBgn0067861	CG9580	Sdic:CG9580	Sdic:CG9580	43984	---	---	---	IPR001680 // G-protein beta WD-40 repeat // 0.047 /// IPR001680 // G-protein beta WD-40 repeat // 0.081 /// IPR001680 // G-protein beta WD-40 repeat // 4.5E-5
12798	153997_at	0.535338	2.84583	8.86132	4.66132e-10	8.6041e-09	12.6246	FBgn0028671	CG1709	Vha100-1	Vha100-1	43442	8553 // hydrogen-exporting ATPase activity, phosphorylative mechanism // inferred from sequence or structural similarity /// 8553 // hydrogen-exporting ATPase activity, phosphorylative mechanism // inferred from sequence similarity	6812 // cation transport // inferred from electronic annotation /// 15992 // proton transport // inferred from electronic annotation	220 // hydrogen-transporting ATPase V0 domain // inferred from sequence or structural similarity /// 16020 // membrane // inferred from electronic annotation /// 220 // hydrogen-transporting ATPase V0 domain // inferred from sequence similarity	IPR002490 // V-type ATPase, 116 kDa subunit // 1.0E-126 /// IPR002490 // V-type ATPase, 116 kDa subunit // 1.0E-126 /// IPR002490 // V-type ATPase, 116 kDa subunit // 1.0E-126 /// IPR002490 // V-type ATPase, 116 kDa subunit // 1.0E-126 /// IPR002490 // V-type ATPase, 116 kDa subunit // 1.0E-126
10591	151790_at	0.616421	2.80442	8.83697	4.96174e-10	9.0987e-09	12.5615	FBgn0031174	CG1486	CG1486	CG1486	33108	16831 // carboxy-lyase activity // inferred from electronic annotation /// 5515 // protein binding // inferred from physical interaction	6520 // amino acid metabolism // inferred from electronic annotation /// 19752 // carboxylic acid metabolism // inferred from electronic annotation	---	IPR002129 // Pyridoxal-dependent decarboxylase // 5.0E-9
10704	151903_at	0.63049	2.64397	8.82422	5.12699e-10	9.36495e-09	12.5284	FBgn0025117	CG4008	und	uninitiated	34294	4239 // methionyl aminopeptidase activity // inferred from sequence or structural similarity /// 4239 // methionyl aminopeptidase activity // non-traceable author statement /// 5515 // protein binding // inferred from physical interaction /// 4177 // aminopeptidase activity // inferred from electronic annotation /// 4239 // methionyl aminopeptidase activity // inferred from electronic annotation …	6412 // protein biosynthesis // inferred from electronic annotation /// 6464 // protein modification // inferred from electronic annotation /// 6508 // proteolysis // inferred from electronic annotation	---	IPR000994 // Peptidase M24 // 3.8E-12
130	141329_at	0.783807	3.28021	8.81062	5.30933e-10	9.65082e-09	12.493	FBgn0011230	CG14472	poe	purity of essence	46243	4842 // ubiquitin-protein ligase activity // inferred from electronic annotation /// 5516 // calmodulin binding // inferred from direct assay /// 5488 // binding // inferred from electronic annotation /// 8270 // zinc ion binding // inferred from electronic annotation	6512 // ubiquitin cycle // inferred from electronic annotation /// 7286 // spermatid development // inferred from mutant phenotype /// 7291 // sperm individualization // inferred from mutant phenotype	---	IPR003126 // Zn-finger (putative), N-recognin // 3.6E-34
11528	152727_at	0.869038	2.67769	8.8105	5.31089e-10	9.65082e-09	12.4927	---	CG7224	---	---	---	---	---	---	---
3631	144830_at	0.698456	0.433413	8.80392	5.40156e-10	9.80257e-09	12.4756	FBgn0003321	CG1664	sbr	small bristles	43944	3729 // mRNA binding // inferred from electronic annotation /// 8565 // protein transporter activity // inferred from electronic annotation /// 5515 // protein binding // inferred from physical interaction /// 5215 // transporter activity // inferred from electronic annotation /// 3723 // RNA binding // inferred from electronic annotation	6406 // mRNA export from nucleus // non-traceable author statement /// 6406 // mRNA export from nucleus // traceable author statement /// 6606 // protein import into nucleus // inferred from electronic annotation /// 7616 // long-term memory // non-traceable author statement /// 16973 // poly(A)+ mRNA export from nucleus // inferred from mutant phenotype /// 30534 // adult behavior // non-traceab…	5635 // nuclear envelope // inferred from direct assay /// 5654 // nucleoplasm // inferred from direct assay /// 5654 // nucleoplasm // non-traceable author statement /// 16020 // membrane // inferred from electronic annotation /// 16021 // integral to membrane // inferred from electronic annotation /// 5622 // intracellular // inferred from electronic annotation /// 5634 // nucleus // inferred f…	IPR005637 // TAP C-terminal domain // 3.4E-38
9368	150567_at	0.646944	5.34903	8.79819	5.48168e-10	9.90947e-09	12.4607	FBgn0039300	CG10423	RpS27	Ribosomal protein S27	43039	3676 // nucleic acid binding // inferred from electronic annotation /// 3735 // structural constituent of ribosome // inferred from sequence or structural similarity /// 3735 // structural constituent of ribosome // inferred from electronic annotation /// 8270 // zinc ion binding // inferred from electronic annotation /// 46872 // metal ion binding // inferred from electronic annotation /// 3735 …	6412 // protein biosynthesis // inferred from electronic annotation	5840 // ribosome // inferred from electronic annotation /// 5843 // cytosolic small ribosomal subunit (sensu Eukaryota) // inferred from sequence or structural similarity /// 5622 // intracellular // inferred from electronic annotation /// 30529 // ribonucleoprotein complex // inferred from electronic annotation /// 5843 // cytosolic small ribosomal subunit (sensu Eukaryota) // inferred from sequ…	IPR000592 // Ribosomal protein S27E // 2.1E-33
1654	142853_at	0.781517	2.68055	8.79305	5.55468e-10	1.00156e-08	12.4474	FBgn0023175	CG1519	Pros7	Proteasome 7 subunit	36018	4175 // endopeptidase activity // non-traceable author statement /// 5515 // protein binding // inferred from physical interaction /// 4175 // endopeptidase activity // inferred from electronic annotation /// 4298 // threonine endopeptidase activity // inferred from electronic annotation /// 8233 // peptidase activity // inferred from electronic annotation /// 16787 // hydrolase activity // infer…	6508 // proteolysis // inferred from electronic annotation /// 6511 // ubiquitin-dependent protein catabolism // inferred from electronic annotation	5839 // proteasome core complex (sensu Eukaryota) // non-traceable author statement /// 5634 // nucleus // inferred from electronic annotation /// 5829 // cytosol // inferred from electronic annotation /// 5839 // proteasome core complex (sensu Eukaryota) // inferred from electronic annotation /// 43234 // protein complex // inferred from electronic annotation	IPR001353 // Peptidase T1, 20S proteasome // 2.9E-38 /// IPR001353 // Peptidase T1, 20S proteasome // 9.2E-9 /// IPR001353 // Peptidase T1, 20S proteasome // 6.5E-65
8914	150113_at	0.774183	1.96845	8.78776	5.63087e-10	1.01269e-08	12.4336	FBgn0038565	CG7794	CG7794	CG7794	42159	3924 // GTPase activity // inferred from electronic annotation /// 5200 // structural constituent of cytoskeleton // inferred from sequence or structural similarity /// 5525 // GTP binding // inferred from electronic annotation /// 15631 // tubulin binding // inferred from electronic annotation /// 166 // nucleotide binding // inferred from electronic annotation /// 5198 // structural molecule ac…	6886 // intracellular protein transport // inferred from electronic annotation /// 6928 // cell motility // inferred from electronic annotation /// 7010 // cytoskeleton organization and biogenesis // inferred from electronic annotation /// 7018 // microtubule-based movement // inferred from electronic annotation /// 7059 // chromosome segregation // inferred from electronic annotation /// 7067 //…	5874 // microtubule // inferred from sequence or structural similarity /// 45298 // tubulin // inferred from electronic annotation /// 5874 // microtubule // inferred from electronic annotation /// 43234 // protein complex // inferred from electronic annotation /// 5874 // microtubule // inferred from sequence similarity	IPR003008 // Tubulin/FtsZ, GTPase // 2.4E-75 /// IPR008280 // Tubulin/FtsZ, C-terminal // 1.0E-57
3660	144859_at	1.13395	2.39546	8.78201	5.71469e-10	1.02513e-08	12.4187	FBgn0030283	CG15198	CG15198	CG15198	32065	5515 // protein binding // inferred from physical interaction	---	---	---
1231	142430_at	0.83818	-0.28841	8.78135	5.72453e-10	1.02558e-08	12.4169	FBgn0031506	CG8825	gkt	glaikit	33530	17005 // tyrosyl-DNA phosphodiesterase activity // inferred from sequence or structural similarity /// 8081 // phosphoric diester hydrolase activity // inferred from electronic annotation /// 16787 // hydrolase activity // inferred from electronic annotation /// 17005 // tyrosyl-DNA phosphodiesterase activity // inferred from sequence similarity	7417 // central nervous system development // inferred from mutant phenotype /// 45197 // establishment and/or maintenance of epithelial cell polarity // inferred from mutant phenotype /// 6281 // DNA repair // inferred from sequence or structural similarity /// 6281 // DNA repair // inferred from electronic annotation /// 6974 // response to DNA damage stimulus // inferred from electronic annota…	5634 // nucleus // inferred from sequence or structural similarity /// 5634 // nucleus // inferred from electronic annotation	IPR010347 // Tyrosyl-DNA phosphodiesterase // 1.0E-126
11330	152529_at	0.533328	1.26686	8.75897	6.06409e-10	1.08089e-08	12.3587	FBgn0039219 /// FBgn0031139	CG13630	CG13630 /// CG11227	CG13630 /// CG11227	33071 /// 42943	4239 // methionyl aminopeptidase activity // inferred from sequence or structural similarity /// 5515 // protein binding // inferred from physical interaction /// 4239 // methionyl aminopeptidase activity // inferred from electronic annotation /// 8235 // metalloexopeptidase activity // inferred from electronic annotation /// 4239 // methionyl aminopeptidase activity // inferred from sequence sim…	6412 // protein biosynthesis // inferred from electronic annotation /// 6464 // protein modification // inferred from electronic annotation /// 6508 // proteolysis // inferred from electronic annotation	---	IPR000994 // Peptidase M24 // 4.7E-20
11169	152368_at	0.784537	3.31013	8.75709	6.09359e-10	1.08477e-08	12.3538	FBgn0038465	CG8913	CG8913	CG8913	42049	4601 // peroxidase activity // inferred from sequence or structural similarity /// 4601 // peroxidase activity // inferred from electronic annotation /// 5506 // iron ion binding // inferred from electronic annotation /// 16491 // oxidoreductase activity // inferred from electronic annotation /// 46872 // metal ion binding // inferred from electronic annotation /// 4601 // peroxidase activity // …	6800 // oxygen and reactive oxygen species metabolism // inferred from electronic annotation /// 6952 // defense response // inferred from electronic annotation	---	IPR002007 // Animal haem peroxidase // 1.1E-41 /// IPR002007 // Animal haem peroxidase // 7.5E-30
4442	145641_s_at	0.614761	0.841053	8.75438	6.13641e-10	1.091e-08	12.3467	FBgn0031426	CG18641	CG18641	CG18641	33429	16298 // lipase activity // inferred from sequence or structural similarity /// 16298 // lipase activity // inferred from sequence similarity	6629 // lipid metabolism // inferred from electronic annotation	---	IPR000734 // Lipase // 9.0E-32
11348	152547_at	0.510515	3.4636	8.74881	6.22512e-10	1.10397e-08	12.3322	FBgn0033385	CG8055	CG8055	CG8055	35933	5386 // carrier activity // inferred from electronic annotation /// 5488 // binding // inferred from electronic annotation /// 5515 // protein binding // inferred from physical interaction /// 42802 // identical protein binding // inferred from physical interaction	6886 // intracellular protein transport // inferred from electronic annotation	---	IPR005024 // Snf7 // 4.7E-72
12209	153408_at	0.79571	2.17127	8.74352	6.31062e-10	1.11772e-08	12.3184	FBgn0051324	CG31324	CG31324	CG31324	43177	---	---	---	---
102	141301_at	0.65252	2.70587	8.7348	6.45412e-10	1.13966e-08	12.2957	FBgn0004885	CG6863	tok	tolkin	42944	5509 // calcium ion binding // inferred from electronic annotation /// 8270 // zinc ion binding // inferred from electronic annotation /// 8533 // astacin activity // inferred from electronic annotation /// 17026 // procollagen C-endopeptidase activity // inferred from sequence or structural similarity /// 8237 // metallopeptidase activity // inferred from electronic annotation /// 17026 // proco…	6508 // proteolysis // inferred from electronic annotation /// 9950 // dorsal/ventral axis specification // inferred from electronic annotation	---	IPR001506 // Peptidase M12A, astacin // 4.0E-120 /// IPR006209 // EGF-like domain // 1.5E-8 /// IPR006209 // EGF-like domain // 1.6E-7 /// IPR000859 // CUB // 6.5E-34 /// IPR000859 // CUB // 9.0E-57 /// IPR000859 // CUB // 2.9E-46 /// IPR000859 // CUB // 1.8E-51 /// IPR000859 // CUB // 1.7E-32
12516	153715_at	0.604152	2.34345	8.73191	6.50257e-10	1.14593e-08	12.2881	FBgn0036194	CG11652	CG11652	CG11652	39317	5515 // protein binding // inferred from physical interaction	6952 // defense response // inferred from electronic annotation	---	IPR002728 // Diphthamide synthesis DPH2 protein // 1.0E-126
4948	146147_at	0.78382	0.445095	8.71523	6.7887e-10	1.18887e-08	12.2446	FBgn0032230	CG13139	CG13139	CG13139	34405	5515 // protein binding // inferred from physical interaction	---	---	---
13408	154607_at	0.798075	2.3019	8.70561	6.95949e-10	1.21726e-08	12.2195	FBgn0028420	CG18783	Kr-h1	Kruppel homolog 1	33861	3700 // transcription factor activity // non-traceable author statement /// 8270 // zinc ion binding // inferred from electronic annotation /// 3676 // nucleic acid binding // inferred from electronic annotation /// 3677 // DNA binding // inferred from electronic annotation /// 46872 // metal ion binding // inferred from electronic annotation	6357 // regulation of transcription from RNA polymerase II promoter // inferred from electronic annotation /// 7552 // metamorphosis // non-traceable author statement /// 8283 // cell proliferation // inferred from electronic annotation /// 35075 // response to ecdysone // inferred from mutant phenotype /// 45449 // regulation of transcription // non-traceable author statement /// 46698 // metamo…	5634 // nucleus // non-traceable author statement /// 5634 // nucleus // inferred from electronic annotation	IPR007087 // Zn-finger, C2H2 type // 3.3E-6 /// IPR007087 // Zn-finger, C2H2 type // 1.3E-5 /// IPR007087 // Zn-finger, C2H2 type // 1.0E-6 /// IPR007087 // Zn-finger, C2H2 type // 2.2E-6 /// IPR007087 // Zn-finger, C2H2 type // 1.0E-4 /// IPR007087 // Zn-finger, C2H2 type // 7.8E-6 /// IPR007087 // Zn-finger, C2H2 type // 3.3E-6 /// IPR007087 // Zn-finger, C2H2 type // 1.3E-5 /// IPR007087 // Zn…
3172	144371_at	0.555248	1.28803	8.70073	7.04773e-10	1.22962e-08	12.2068	FBgn0040362	CG11379	CG11379	CG11379	31062	5515 // protein binding // inferred from physical interaction	---	---	---
5331	146530_at	0.785629	0.663445	8.67935	7.44839e-10	1.28989e-08	12.1509	FBgn0045064	CG13969	bwa	brain washing	250736	17040 // ceramidase activity // non-traceable author statement /// 16811 // hydrolase activity, acting on carbon-nitrogen (but not peptide) bonds, in linear amides // inferred from electronic annotation	6672 // ceramide metabolism // inferred from electronic annotation /// 7420 // brain development // inferred from mutant phenotype	139 // Golgi membrane // inferred from electronic annotation /// 5789 // endoplasmic reticulum membrane // inferred from electronic annotation /// 16021 // integral to membrane // inferred from electronic annotation	IPR008901 // Alkaline phytoceramidase // 1.0E-126
10585	151784_at	0.523061	0.993609	8.67974	7.441e-10	1.28989e-08	12.1519	FBgn0013951	CG14228	Mer	Merlin	32979	5200 // structural constituent of cytoskeleton // inferred from electronic annotation /// 5515 // protein binding // inferred from physical interaction /// 8092 // cytoskeletal protein binding // inferred from sequence or structural similarity /// 5488 // binding // inferred from electronic annotation /// 8092 // cytoskeletal protein binding // inferred from electronic annotation /// 8092 // cyto…	1558 // regulation of cell growth // inferred from expression pattern /// 6897 // endocytosis // inferred from expression pattern /// 7010 // cytoskeleton organization and biogenesis // inferred from electronic annotation /// 7267 // cell-cell signaling // inferred from expression pattern /// 9798 // axis specification // inferred from mutant phenotype /// 19094 // pole plasm mRNA localization //…	5737 // cytoplasm // inferred from direct assay /// 5856 // cytoskeleton // inferred from electronic annotation /// 5886 // plasma membrane // inferred from direct assay /// 5912 // adherens junction // inferred from direct assay /// 5915 // zonula adherens // traceable author statement /// 16020 // membrane // inferred from direct assay /// 16324 // apical plasma membrane // traceable author sta…	IPR000299 // Band 4.1 // 1.0E-101 /// IPR000798 // Ezrin/radixin/moesin ERM // 1.0E-126
10710	151909_at	0.84085	3.14807	8.66899	7.65091e-10	1.31844e-08	12.1238	FBgn0032350	CG6287	CG6287	CG6287	34554	4617 // phosphoglycerate dehydrogenase activity // inferred from sequence or structural similarity /// 16616 // oxidoreductase activity, acting on the CH-OH group of donors, NAD or NADP as acceptor // inferred from electronic annotation /// 51287 // NAD binding // inferred from electronic annotation /// 4617 // phosphoglycerate dehydrogenase activity // inferred from sequence similarity	5975 // carbohydrate metabolism // inferred from electronic annotation /// 6564 // L-serine biosynthesis // inferred from electronic annotation /// 8652 // amino acid biosynthesis // inferred from electronic annotation /// 8152 // metabolism // inferred from electronic annotation	---	IPR006140 // D-isomer specific 2-hydroxyacid dehydrogenase, NAD binding domain // 5.7E-75 /// IPR006139 // D-isomer specific 2-hydroxyacid dehydrogenase, catalytic domain // 3.2E-25
12019	153218_at	0.757404	2.34001	8.66846	7.66146e-10	1.31864e-08	12.1224	FBgn0034709	CG3074	CG3074	CG3074	37537	4213 // cathepsin B activity // inferred from sequence or structural similarity /// 5515 // protein binding // inferred from physical interaction /// 4197 // cysteine-type endopeptidase activity // inferred from electronic annotation /// 8234 // cysteine-type peptidase activity // inferred from electronic annotation /// 4213 // cathepsin B activity // inferred from sequence similarity	6508 // proteolysis // inferred from electronic annotation /// 19538 // protein metabolism // inferred from electronic annotation	---	IPR000668 // Peptidase C1A, papain // 4.3E-75
3904	145103_at	0.706181	1.09115	8.66523	7.72577e-10	1.32807e-08	12.1139	FBgn0030614	CG9072	CG9072	CG9072	32443	5515 // protein binding // inferred from physical interaction /// 51082 // unfolded protein binding // inferred from electronic annotation	7022 // chaperonin-mediated tubulin folding // inferred from electronic annotation	---	IPR004226 // Tubulin binding cofactor A // 1.6E-47
7939	149138_at	0.761278	1.77362	8.65995	7.83207e-10	1.3447e-08	12.1001	FBgn0037011	CG4858	CG4858	CG4858	40282	166 // nucleotide binding // inferred from sequence or structural similarity /// 5524 // ATP binding // inferred from electronic annotation /// 5515 // protein binding // inferred from physical interaction /// 166 // nucleotide binding // inferred from sequence similarity	---	---	---
3121	144320_at	0.50945	0.185988	8.64886	8.06037e-10	1.37547e-08	12.0711	FBgn0028936	CG16873	CG16873	CG16873	34815	---	---	---	---
13066	154265_at	0.88599	0.94422	8.63088	8.44506e-10	1.43066e-08	12.024	FBgn0033342	CG8258	CG8258	CG8258	35882	5524 // ATP binding // inferred from electronic annotation /// 42623 // ATPase activity, coupled // inferred from sequence or structural similarity /// 51082 // unfolded protein binding // inferred from electronic annotation /// 166 // nucleotide binding // inferred from electronic annotation /// 5515 // protein binding // inferred from electronic annotation /// 42623 // ATPase activity, coupled …	6457 // protein folding // inferred from electronic annotation /// 6457 // protein folding // inferred from sequence or structural similarity /// 44267 // cellular protein metabolism // inferred from electronic annotation /// 6457 // protein folding // inferred from sequence similarity	5832 // chaperonin-containing T-complex // inferred from sequence or structural similarity /// 5832 // chaperonin-containing T-complex // inferred from sequence similarity	IPR002423 // Chaperonin Cpn60/TCP-1 // 1.0E-126
7572	148771_at	0.445856	0.408281	8.62572	8.55881e-10	1.44818e-08	12.0104	FBgn0036456	CG13466	CG13466	CG13466	39618	5200 // structural constituent of cytoskeleton // inferred from electronic annotation /// 8017 // microtubule binding // inferred from sequence or structural similarity /// 8017 // microtubule binding // non-traceable author statement /// 8017 // microtubule binding // inferred from sequence similarity	7017 // microtubule-based process // non-traceable author statement /// 7067 // mitosis // inferred from electronic annotation /// 7242 // intracellular signaling cascade // inferred from electronic annotation	5874 // microtubule // inferred from electronic annotation	IPR003533 // Doublecortin // 3.4E-5 /// IPR005108 // HELP domain // 5.1E-44 /// IPR001680 // G-protein beta WD-40 repeat // 0.0016 /// IPR001680 // G-protein beta WD-40 repeat // 0.094 /// IPR001680 // G-protein beta WD-40 repeat // 5.7E-5 /// IPR001680 // G-protein beta WD-40 repeat // 0.03 /// IPR001680 // G-protein beta WD-40 repeat // 1.2 /// IPR001680 // G-protein beta WD-40 repeat // 0.6
10734	151933_at	0.580368	1.35899	8.62102	8.6639e-10	1.46419e-08	11.9981	FBgn0027593	CG3799	CG3799	CG3799	39901	---	---	---	IPR001452 // SH3 // 1.0E-13 /// IPR000219 // DH domain // 3.7E-14
2524	143723_at	0.535342	3.56594	8.60753	8.97266e-10	1.5109e-08	11.9627	FBgn0013771	CG10246	Cyp6a9	Cytochrome P450-6a9	36663	4497 // monooxygenase activity // inferred from electronic annotation /// 16491 // oxidoreductase activity // inferred from electronic annotation /// 5515 // protein binding // inferred from physical interaction /// 5506 // iron ion binding // inferred from electronic annotation /// 20037 // heme binding // inferred from electronic annotation /// 46872 // metal ion binding // inferred from electr…	6118 // electron transport // inferred from electronic annotation /// 8202 // steroid metabolism // inferred from electronic annotation /// 17143 // insecticide metabolism // non-traceable author statement	5792 // microsome // non-traceable author statement /// 16020 // membrane // non-traceable author statement /// 5783 // endoplasmic reticulum // inferred from electronic annotation /// 5792 // microsome // inferred from electronic annotation /// 16020 // membrane // inferred from electronic annotation	IPR001128 // Cytochrome P450 // 3.1E-113
1828	143027_at	0.714003	2.00826	8.6048	9.0365e-10	1.51982e-08	11.9556	FBgn0039120	CG10198	Nup98	Nup98	42816	---	6605 // protein targeting // inferred from electronic annotation /// 6810 // transport // inferred from electronic annotation	5643 // nuclear pore // inferred from sequence or structural similarity /// 5643 // nuclear pore // inferred from electronic annotation /// 5643 // nuclear pore // inferred from sequence similarity	IPR007230 // Peptidase S59, nucleoporin // 8.5E-78
1106	142305_at	0.614132	1.08375	8.59802	9.19705e-10	1.54497e-08	11.9378	FBgn0003093	CG1954	Pkc98E	Protein C kinase 98E	43428	4674 // protein serine/threonine kinase activity // non-traceable author statement /// 4697 // protein kinase C activity // inferred from sequence or structural similarity /// 4698 // calcium-dependent protein kinase C activity // non-traceable author statement /// 4701 // diacylglycerol-activated phospholipid-dependent protein kinase C activity // non-traceable author statement /// 4702 // recep…	165 // MAPKKK cascade // inferred from electronic annotation /// 6468 // protein amino acid phosphorylation // inferred from sequence or structural similarity /// 6468 // protein amino acid phosphorylation // non-traceable author statement /// 7049 // cell cycle // inferred from electronic annotation /// 19226 // transmission of nerve impulse // inferred from electronic annotation /// 19722 // ca…	---	IPR000008 // C2 domain // 1.1E-16 /// IPR002219 // Protein kinase C, phorbol ester/diacylglycerol binding // 1.6E-25 /// IPR002219 // Protein kinase C, phorbol ester/diacylglycerol binding // 1.0E-25 /// IPR000719 // Protein kinase // 7.4E-86 /// IPR000961 // Protein kinase C-terminal domain // 5.3E-41
12940	154139_at	0.472139	0.711203	8.59719	9.21694e-10	1.54646e-08	11.9356	FBgn0039709	CG31009	Cad99C	Cad99C	43528	5509 // calcium ion binding // inferred from electronic annotation	7156 // homophilic cell adhesion // inferred from electronic annotation /// 7165 // signal transduction // inferred from electronic annotation /// 16339 // calcium-dependent cell-cell adhesion // inferred from sequence or structural similarity /// 48100 // wing disc anterior/posterior pattern formation // inferred from mutant phenotype /// 16339 // calcium-dependent cell-cell adhesion // inferred…	5887 // integral to plasma membrane // inferred from sequence or structural similarity /// 16021 // integral to membrane // non-traceable author statement /// 16020 // membrane // inferred from electronic annotation /// 5887 // integral to plasma membrane // inferred from sequence similarity	IPR002126 // Cadherin // 2.0E-21 /// IPR002126 // Cadherin // 8.8E-6 /// IPR002126 // Cadherin // 2.7E-12 /// IPR002126 // Cadherin // 1.6E-23 /// IPR002126 // Cadherin // 3.1E-22 /// IPR002126 // Cadherin // 4.1E-12 /// IPR002126 // Cadherin // 3.6E-12 /// IPR002126 // Cadherin // 1.1E-6
12941	154140_at	0.639341	1.29691	8.5792	9.65827e-10	1.61086e-08	11.8883	FBgn0032342	CG4713	CG4713	CG4713	34543	---	---	---	IPR000008 // C2 domain // 1.5E-4
13882	155081_at	0.838992	1.97639	8.57399	9.78995e-10	1.63088e-08	11.8746	FBgn0028424	CG3767	JhI-26	Juvenile hormone-inducible protein 26	36819	5515 // protein binding // inferred from physical interaction /// 16301 // kinase activity // inferred from electronic annotation /// 16740 // transferase activity // inferred from electronic annotation	---	---	IPR004119 // Protein of unknown function DUF227 // 1.1E-26
3424	144623_at	0.495268	-0.231159	8.57307	9.81328e-10	1.63283e-08	11.8722	FBgn0029912	CG4557	CG4557	CG4557	31629	3700 // transcription factor activity // inferred from sequence or structural similarity /// 3700 // transcription factor activity // inferred from sequence similarity	---	---	---
12191	153390_at	0.864097	1.45268	8.57088	9.86952e-10	1.64024e-08	11.8665	FBgn0028577	CG12085	pUf68	poly U binding factor 68kD	38173	3729 // mRNA binding // inferred from sequence or structural similarity /// 8266 // poly(U) binding // inferred from sequence or structural similarity /// 8266 // poly(U) binding // non-traceable author statement /// 166 // nucleotide binding // inferred from electronic annotation /// 3676 // nucleic acid binding // inferred from electronic annotation /// 3723 // RNA binding // inferred from elec…	74 // regulation of progression through cell cycle // inferred from mutant phenotype /// 380 // alternative nuclear mRNA splicing, via spliceosome // inferred from mutant phenotype /// 381 // regulation of alternative nuclear mRNA splicing, via spliceosome // inferred from mutant phenotype /// 398 // nuclear mRNA splicing, via spliceosome // inferred from mutant phenotype /// 398 // nuclear mRNA …	5634 // nucleus // Unknown /// 5634 // nucleus // inferred from direct assay /// 5681 // spliceosome complex // inferred from electronic annotation /// 5634 // nucleus // inferred from electronic annotation /// 5634 // nucleus // inferred from curator	IPR000504 // RNA-binding region RNP-1 (RNA recognition motif) // 1.9E-23 /// IPR000504 // RNA-binding region RNP-1 (RNA recognition motif) // 1.9E-18 /// IPR000504 // RNA-binding region RNP-1 (RNA recognition motif) // 1.9E-23 /// IPR000504 // RNA-binding region RNP-1 (RNA recognition motif) // 1.9E-18
3092	144291_at	0.718712	-0.172173	8.54491	1.05597e-09	1.74665e-08	11.7981	FBgn0053515	CG33515	CG33515	CG33515	3346206	---	---	---	IPR007110 // Immunoglobulin-like // 4.2E-8 /// IPR007110 // Immunoglobulin-like // 3.1E-4 /// IPR007110 // Immunoglobulin-like // 0.025 /// IPR007110 // Immunoglobulin-like // 1.1E-4 /// IPR007110 // Immunoglobulin-like // 5.7E-4
11568	152767_at	0.791591	1.252	8.53655	1.07923e-09	1.78092e-08	11.7761	FBgn0040600	CG13631	CG13631	CG13631	50073	5515 // protein binding // inferred from physical interaction	---	---	---
11821	153020_at	0.841161	1.04876	8.53579	1.08138e-09	1.78236e-08	11.7741	FBgn0044452	CG1241	Atg2	Autophagy-specific gene 2	38344	---	6914 // autophagy // inferred from mutant phenotype	---	---
1819	143018_at	0.588124	0.459619	8.53313	1.08889e-09	1.79264e-08	11.7671	FBgn0003714	CG7925	tko	technical knockout	31228	3676 // nucleic acid binding // inferred from electronic annotation /// 3735 // structural constituent of ribosome // inferred from sequence or structural similarity /// 3735 // structural constituent of ribosome // non-traceable author statement /// 3735 // structural constituent of ribosome // inferred from electronic annotation /// 3735 // structural constituent of ribosome // inferred from se…	6412 // protein biosynthesis // inferred from sequence or structural similarity /// 7605 // sensory perception of sound // traceable author statement /// 7610 // behavior // non-traceable author statement /// 7619 // courtship behavior // traceable author statement /// 7638 // mechanosensory behavior // inferred from mutant phenotype /// 8049 // male courtship behavior // inferred from mutant phe…	5761 // mitochondrial ribosome // non-traceable author statement /// 5763 // mitochondrial small ribosomal subunit // inferred from sequence or structural similarity /// 5622 // intracellular // inferred from electronic annotation /// 5739 // mitochondrion // inferred from electronic annotation /// 5840 // ribosome // inferred from electronic annotation /// 15935 // small ribosomal subunit // inf…	IPR006032 // Ribosomal protein S12/S23 // 2.2E-34
10541	151740_at	0.672039	4.09657	8.53145	1.09368e-09	1.79841e-08	11.7627	FBgn0030086	CG7033	CG7033	CG7033	31838	3676 // nucleic acid binding // inferred from electronic annotation /// 5524 // ATP binding // inferred from electronic annotation /// 8026 // ATP-dependent helicase activity // inferred from electronic annotation /// 42623 // ATPase activity, coupled // inferred from electronic annotation /// 51082 // unfolded protein binding // inferred from electronic annotation /// 5515 // protein binding // …	6457 // protein folding // inferred from electronic annotation /// 6457 // protein folding // inferred from sequence or structural similarity /// 44267 // cellular protein metabolism // inferred from electronic annotation /// 6457 // protein folding // inferred from sequence similarity	5832 // chaperonin-containing T-complex // inferred from sequence or structural similarity /// 5832 // chaperonin-containing T-complex // inferred from sequence similarity	IPR002423 // Chaperonin Cpn60/TCP-1 // 1.0E-126 /// IPR002423 // Chaperonin Cpn60/TCP-1 // 1.0E-126
10637	151836_at	0.651837	2.33613	8.52951	1.09923e-09	1.80541e-08	11.7576	FBgn0033710	CG17739	CG17739	CG17739	36333	5198 // structural molecule activity // inferred from electronic annotation /// 5515 // protein binding // inferred from physical interaction /// 4867 // serine-type endopeptidase inhibitor activity // inferred from electronic annotation	7010 // cytoskeleton organization and biogenesis // inferred from electronic annotation /// 7398 // ectoderm development // inferred from electronic annotation /// 7155 // cell adhesion // inferred from electronic annotation /// 7275 // development // inferred from electronic annotation	5576 // extracellular region // inferred from sequence or structural similarity /// 5576 // extracellular region // inferred from sequence similarity	IPR002861 // Reeler region // 2.1E-29 /// IPR000884 // Thrombospondin, type I // 8.9E-5 /// IPR000884 // Thrombospondin, type I // 5.1E-13 /// IPR000884 // Thrombospondin, type I // 5.8E-5 /// IPR000884 // Thrombospondin, type I // 6.6E-11 /// IPR002223 // Pancreatic trypsin inhibitor (Kunitz) // 5.4E-11 /// IPR009465 // Spondin, N-terminal // 1.0E-126
13917	155116_at	0.580989	1.72508	8.5177	1.1336e-09	1.85968e-08	11.7265	FBgn0040294	CG4909	POSH	Plenty of SH3s	36990	4842 // ubiquitin-protein ligase activity // inferred from electronic annotation /// 5200 // structural constituent of cytoskeleton // inferred from electronic annotation /// 8270 // zinc ion binding // inferred from electronic annotation /// 30159 // receptor signaling complex scaffold activity // non-traceable author statement /// 5515 // protein binding // inferred from electronic annotation	8103 // oocyte microtubule cytoskeleton polarization // inferred from mutant phenotype /// 8104 // protein localization // inferred from mutant phenotype /// 8340 // determination of adult life span // inferred from mutant phenotype /// 8340 // determination of adult life span // non-traceable author statement /// 16567 // protein ubiquitination // inferred from electronic annotation /// 42052 //…	151 // ubiquitin ligase complex // inferred from electronic annotation	IPR001452 // SH3 // 4.7E-13 /// IPR001452 // SH3 // 6.2E-5 /// IPR001452 // SH3 // 4.8E-10 /// IPR001452 // SH3 // 2.0E-10 /// IPR001841 // Zn-finger, RING // 6.6E-11
5304	146503_at	0.774407	2.93795	8.50722	1.16503e-09	1.90456e-08	11.6988	FBgn0041180	CG10363	TepIV	Thiolester containing protein IV	35248	4866 // endopeptidase inhibitor activity // inferred from electronic annotation /// 5351 // sugar porter activity // inferred from electronic annotation /// 30414 // protease inhibitor activity // inferred from sequence or structural similarity /// 30414 // protease inhibitor activity // inferred from sequence similarity	6961 // antibacterial humoral response (sensu Protostomia) // inferred from direct assay /// 9401 // phosphoenolpyruvate-dependent sugar phosphotransferase system // inferred from electronic annotation	---	IPR001599 // Alpha-2-macroglobulin // 1.4E-100 /// IPR002890 // Alpha-2-macroglobulin, N-terminal // 1.9E-16 /// IPR002890 // Alpha-2-macroglobulin, N-terminal // 7.5E-11 /// IPR002890 // Alpha-2-macroglobulin, N-terminal // 3.1E-9
12115	153314_at	0.814387	2.65301	8.50155	1.18238e-09	1.92394e-08	11.6839	FBgn0040227	CG10161	eIF-3p66	Eukaryotic initiation factor 3 p66 subunit	42789	3743 // translation initiation factor activity // inferred from sequence or structural similarity /// 3743 // translation initiation factor activity // non-traceable author statement /// 3743 // translation initiation factor activity // inferred from electronic annotation /// 3743 // translation initiation factor activity // inferred from sequence similarity	6412 // protein biosynthesis // non-traceable author statement /// 6413 // translational initiation // inferred from sequence or structural similarity /// 6413 // translational initiation // non-traceable author statement /// 6413 // translational initiation // inferred from electronic annotation /// 6413 // translational initiation // inferred from sequence similarity	5829 // cytosol // inferred from sequence or structural similarity /// 5829 // cytosol // non-traceable author statement /// 5852 // eukaryotic translation initiation factor 3 complex // inferred from sequence or structural similarity /// 5852 // eukaryotic translation initiation factor 3 complex // non-traceable author statement /// 5829 // cytosol // inferred from sequence similarity /// 5852 /…	IPR007783 // Eukaryotic translation initiation factor 3, subunit 7 // 1.0E-126 /// IPR007783 // Eukaryotic translation initiation factor 3, subunit 7 // 6.1E-17 /// IPR007783 // Eukaryotic translation initiation factor 3, subunit 7 // 1.0E-126
10838	152037_at	0.624288	2.05447	8.49325	1.20828e-09	1.96154e-08	11.662	FBgn0053057 /// FBgn0035889	CG33057 /// CG7163	CG33057 /// mkg-p	CG33057 /// monkey king protein	318833 /// 38955	3676 // nucleic acid binding // inferred from electronic annotation /// 8270 // zinc ion binding // inferred from electronic annotation /// 16772 // transferase activity, transferring phosphorus-containing groups // inferred from electronic annotation /// 16779 // nucleotidyltransferase activity // inferred from electronic annotation /// 8665 // 2'-phosphotransferase activity // inferred from seq…	6388 // tRNA splicing // inferred from electronic annotation /// 6388 // tRNA splicing // inferred from sequence or structural similarity /// 6388 // tRNA splicing // inferred from sequence similarity	5634 // nucleus // inferred from electronic annotation	IPR002745 // Phosphotransferase KptA/Tpt1 // 8.1E-39 /// IPR002934 // DNA polymerase, beta-like region // 1.4E-5
10768	151967_at	0.714704	0.940192	8.47709	1.26039e-09	2.03669e-08	11.6193	FBgn0032287	CG6415	CG6415	CG6415	34474	4047 // aminomethyltransferase activity // inferred from sequence or structural similarity /// 4047 // aminomethyltransferase activity // inferred from electronic annotation /// 8483 // transaminase activity // inferred from electronic annotation /// 16740 // transferase activity // inferred from electronic annotation /// 4047 // aminomethyltransferase activity // inferred from sequence similarity	6546 // glycine catabolism // inferred from sequence or structural similarity /// 6546 // glycine catabolism // inferred from electronic annotation /// 6546 // glycine catabolism // inferred from sequence similarity	5960 // glycine cleavage complex // inferred from sequence or structural similarity /// 5737 // cytoplasm // inferred from electronic annotation /// 5960 // glycine cleavage complex // inferred from sequence similarity	IPR006222 // Glycine cleavage T protein (aminomethyl transferase) // 2.9E-117
6407	147606_at	0.986173	1.30789	8.46815	1.29021e-09	2.07529e-08	11.5957	FBgn0034601	CG4286	CG4286	CG4286	37416	---	---	---	---
11035	152234_at	0.962774	1.53592	8.45685	1.3289e-09	2.13263e-08	11.5659	FBgn0008635	CG6223	Cop	coatomer protein	32820	5515 // protein binding // inferred from physical interaction /// 5488 // binding // inferred from electronic annotation	6886 // intracellular protein transport // inferred from electronic annotation /// 6887 // exocytosis // inferred from electronic annotation /// 6890 // retrograde vesicle-mediated transport, Golgi to ER // inferred from sequence or structural similarity /// 6890 // retrograde vesicle-mediated transport, Golgi to ER // non-traceable author statement /// 6605 // protein targeting // inferred from …	5794 // Golgi apparatus // inferred from direct assay /// 30126 // COPI vesicle coat // inferred from sequence or structural similarity /// 30126 // COPI vesicle coat // non-traceable author statement /// 5795 // Golgi stack // inferred from electronic annotation /// 16020 // membrane // inferred from electronic annotation /// 30126 // COPI vesicle coat // inferred from sequence similarity	IPR002553 // Adaptin, N-terminal // 1.0E-126
3691	144890_at	0.741157	0.416512	8.44694	1.36383e-09	2.18619e-08	11.5397	FBgn0030322	CG15220	CG15220	CG15220	32113	3677 // DNA binding // inferred from sequence or structural similarity /// 5515 // protein binding // inferred from physical interaction /// 3676 // nucleic acid binding // inferred from electronic annotation /// 3677 // DNA binding // inferred from sequence similarity	6260 // DNA replication // inferred from sequence or structural similarity /// 6260 // DNA replication // inferred from sequence similarity	5662 // DNA replication factor A complex // non-traceable author statement /// 5634 // nucleus // inferred from electronic annotation	---
11161	152360_at	0.841092	2.03072	8.40372	1.52734e-09	2.4316e-08	11.4253	FBgn0024248	CG5686	chico	chico	64880	5158 // insulin receptor binding // inferred from electronic annotation /// 5159 // insulin-like growth factor receptor binding // inferred from genetic interaction /// 5159 // insulin-like growth factor receptor binding // inferred from sequence or structural similarity /// 5159 // insulin-like growth factor receptor binding // non-traceable author statement /// 5158 // insulin receptor binding …	902 // cellular morphogenesis // inferred from mutant phenotype /// 1678 // cell glucose homeostasis // inferred from electronic annotation /// 7295 // egg chamber growth (sensu Insecta) // inferred from mutant phenotype /// 7296 // vitellogenesis // inferred from mutant phenotype /// 7568 // aging // inferred from mutant phenotype /// 8152 // metabolism // traceable author statement /// 8286 // …	5634 // nucleus // inferred from sequence or structural similarity /// 5737 // cytoplasm // inferred from sequence or structural similarity /// 5792 // microsome // inferred from sequence or structural similarity	IPR002404 // Insulin receptor substrate-1, PTB // 2.0E-18 /// IPR001849 // Pleckstrin-like // 3.5E-13
3322	144521_at	1.41832	3.06501	8.39504	1.56252e-09	2.48478e-08	11.4023	FBgn0029766	CG15784	CG15784	CG15784	31461	---	---	---	---
11181	152380_at	1.14284	2.77787	8.39042	1.58161e-09	2.50944e-08	11.39	FBgn0031129	CG1324	CG1324	CG1324	33060	5515 // protein binding // inferred from physical interaction	---	---	---
13896	155095_at	0.593009	1.03242	8.38478	1.6052e-09	2.54399e-08	11.375	FBgn0031399	CG7074	mio	missing oocyte	33399	51082 // unfolded protein binding // inferred from sequence or structural similarity /// 51082 // unfolded protein binding // inferred from sequence similarity	6457 // protein folding // inferred from sequence or structural similarity /// 16350 // maintenance of oocyte identity (sensu Insecta) // inferred from mutant phenotype /// 30716 // oocyte fate determination // inferred from mutant phenotype /// 40020 // regulation of meiosis // inferred from mutant phenotype /// 6457 // protein folding // inferred from sequence similarity	---	---
407	141606_at	0.71053	1.369	8.37701	1.63827e-09	2.59347e-08	11.3544	FBgn0028736	CG1333	Ero1L	Ero1L	38500	16491 // oxidoreductase activity // inferred from electronic annotation /// 16491 // oxidoreductase activity // inferred from sequence or structural similarity /// 16491 // oxidoreductase activity // inferred from sequence similarity	6457 // protein folding // inferred from electronic annotation /// 6886 // intracellular protein transport // inferred from electronic annotation /// 16192 // vesicle-mediated transport // inferred from electronic annotation /// 19538 // protein metabolism // inferred from electronic annotation /// 51085 // chaperone cofactor dependent protein folding // inferred from sequence or structural simil…	5783 // endoplasmic reticulum // inferred from sequence or structural similarity /// 5783 // endoplasmic reticulum // inferred from electronic annotation /// 16020 // membrane // inferred from electronic annotation /// 5783 // endoplasmic reticulum // inferred from sequence similarity	IPR007266 // Endoplasmic reticulum oxidoreductin 1 // 1.0E-126
10989	152188_at	0.827356	1.18426	8.36131	1.70728e-09	2.69358e-08	11.3128	FBgn0020278	CG5248	loco	locomotion defects	42672	5083 // small GTPase regulator activity // inferred from electronic annotation /// 5096 // GTPase activator activity // inferred from electronic annotation /// 5515 // protein binding // inferred from electronic annotation /// 16299 // regulator of G-protein signaling activity // inferred from sequence or structural similarity /// 5057 // receptor signaling protein activity // inferred from elect…	7303 // cytoplasmic transport, nurse cell to oocyte // inferred from mutant phenotype /// 8069 // dorsal/ventral axis determination, follicular epithelium (sensu Insecta) // inferred from mutant phenotype /// 8277 // regulation of G-protein coupled receptor protein signaling pathway // inferred from sequence or structural similarity /// 8277 // regulation of G-protein coupled receptor protein sig…	---	IPR001478 // PDZ/DHR/GLGF domain // 1.3E-12 /// IPR006020 // Phosphotyrosine interaction domain // 1.2E-5 /// IPR003116 // Raf-like Ras-binding // 7.0E-7 /// IPR000342 // Regulator of G protein // 1.1E-33 /// IPR003116 // Raf-like Ras-binding // 7.0E-7 /// IPR000342 // Regulator of G protein // 1.1E-33 /// IPR003116 // Raf-like Ras-binding // 7.0E-7 /// IPR000342 // Regulator of G protein // 1.1E…
13288	154487_at	0.742842	2.20025	8.35887	1.71823e-09	2.70781e-08	11.3063	FBgn0015791	CG4212	Rab14	Rab-protein 14	34840	3924 // GTPase activity // inferred from sequence or structural similarity /// 5525 // GTP binding // inferred from sequence or structural similarity /// 166 // nucleotide binding // inferred from electronic annotation /// 5525 // GTP binding // inferred from electronic annotation /// 3924 // GTPase activity // inferred from sequence similarity /// 5525 // GTP binding // inferred from sequence si…	6886 // intracellular protein transport // inferred from electronic annotation /// 6898 // receptor mediated endocytosis // inferred from electronic annotation /// 6909 // phagocytosis // inferred from electronic annotation /// 7041 // lysosomal transport // inferred from electronic annotation /// 7165 // signal transduction // inferred from electronic annotation /// 7264 // small GTPase mediated…	16020 // membrane // inferred from electronic annotation	IPR001806 // Ras GTPase superfamily // 6.4E-91 /// IPR001806 // Ras GTPase superfamily // 6.4E-91 /// IPR001806 // Ras GTPase superfamily // 6.4E-91
4224	145423_at	0.711739	0.149181	8.35667	1.72824e-09	2.72052e-08	11.3004	FBgn0031108	CG15459	CG15459	CG15459	33036	---	---	---	---
10606	151805_at	0.757395	1.25513	8.34926	1.76221e-09	2.76158e-08	11.2808	FBgn0016718	CG2194	Reg-3	Rhythmically expressed gene 3	31858	4152 // dihydroorotate dehydrogenase activity // inferred from electronic annotation /// 4158 // dihydroorotate oxidase activity // inferred from electronic annotation /// 5506 // iron ion binding // inferred from electronic annotation /// 15036 // disulfide oxidoreductase activity // inferred from electronic annotation /// 17113 // dihydropyrimidine dehydrogenase (NADP+) activity // inferred fro…	6118 // electron transport // inferred from electronic annotation /// 6206 // pyrimidine base metabolism // inferred from electronic annotation /// 6207 // 'de novo' pyrimidine base biosynthesis // inferred from electronic annotation	5737 // cytoplasm // inferred from electronic annotation /// 16020 // membrane // inferred from electronic annotation	IPR001295 // Dihydroorotate dehydrogenase // 7.5E-29
12936	154135_at	0.831121	2.56033	8.33791	1.81565e-09	2.83581e-08	11.2506	FBgn0002914	CG9045	Myb	Myb oncogene-like	32543	3677 // DNA binding // inferred from direct assay /// 3677 // DNA binding // inferred from sequence or structural similarity /// 3677 // DNA binding // non-traceable author statement /// 3700 // transcription factor activity // traceable author statement /// 16563 // transcriptional activator activity // inferred from sequence or structural similarity /// 5515 // protein binding // inferred from …	910 // cytokinesis // inferred from mutant phenotype /// 6355 // regulation of transcription, DNA-dependent // inferred from direct assay /// 6357 // regulation of transcription from RNA polymerase II promoter // inferred from electronic annotation /// 6916 // anti-apoptosis // inferred from electronic annotation /// 7049 // cell cycle // inferred from genetic interaction /// 7049 // cell cycle /…	5634 // nucleus // inferred from sequence or structural similarity /// 5634 // nucleus // non-traceable author statement /// 31523 // Myb complex // inferred from direct assay /// 5634 // nucleus // inferred from electronic annotation /// 5681 // spliceosome complex // inferred from electronic annotation /// 5634 // nucleus // inferred from sequence similarity	IPR001005 // Myb DNA-binding domain // 3.9E-10 /// IPR001005 // Myb DNA-binding domain // 1.8E-10 /// IPR001005 // Myb DNA-binding domain // 2.1E-13
13767	154966_at	0.492878	1.02056	8.31032	1.95245e-09	3.02252e-08	11.1772	FBgn0053139	CG33139	Ranbp11	Ranbp11	36732	8536 // Ran GTPase binding // non-traceable author statement /// 8565 // protein transporter activity // inferred from electronic annotation /// 5488 // binding // inferred from electronic annotation	59 // protein import into nucleus, docking // inferred from electronic annotation	5634 // nucleus // inferred from electronic annotation /// 5643 // nuclear pore // inferred from electronic annotation /// 5737 // cytoplasm // inferred from electronic annotation	IPR001494 // Importin-beta, N-terminal // 1.9E-23
11565	152764_at	0.597527	0.580975	8.30325	1.98914e-09	3.07254e-08	11.1584	FBgn0034276	CG6385	CG6385	CG6385	37026	4047 // aminomethyltransferase activity // inferred from electronic annotation /// 8480 // sarcosine dehydrogenase activity // inferred from sequence or structural similarity /// 16491 // oxidoreductase activity // inferred from electronic annotation /// 8480 // sarcosine dehydrogenase activity // inferred from sequence similarity	6118 // electron transport // inferred from electronic annotation /// 6520 // amino acid metabolism // inferred from electronic annotation /// 6546 // glycine catabolism // inferred from electronic annotation	5737 // cytoplasm // inferred from electronic annotation	IPR006222 // Glycine cleavage T protein (aminomethyl transferase) // 1.4E-39
3391	144590_at	0.893975	0.952748	8.29921	2.01046e-09	3.10204e-08	11.1476	---	CG15891 /// CG15892	---	---	---	---	---	---	---
5278	146477_at	0.782678	2.73021	8.29796	2.01709e-09	3.10884e-08	11.1443	FBgn0032755	CG17344	CG17344	CG17344	35185	---	---	---	---
9040	150239_at	0.540747	0.489612	8.29019	2.05885e-09	3.16972e-08	11.1236	FBgn0038764	CG4845	CG4845	CG4845	42389	5488 // binding // inferred from electronic annotation	---	---	---
8527	149726_at	0.491674	0.625351	8.28631	2.08006e-09	3.19886e-08	11.1133	FBgn0037981	CG3169	Spt3	Spt3	41461	3700 // transcription factor activity // inferred from sequence or structural similarity /// 16251 // general RNA polymerase II transcription factor activity // inferred from sequence or structural similarity /// 5515 // protein binding // inferred from physical interaction /// 3702 // RNA polymerase II transcription factor activity // inferred from electronic annotation /// 3700 // transcription…	6357 // regulation of transcription from RNA polymerase II promoter // inferred from electronic annotation /// 6367 // transcription initiation from RNA polymerase II promoter // inferred from sequence or structural similarity /// 45449 // regulation of transcription // inferred from sequence or structural similarity /// 6352 // transcription initiation // inferred from electronic annotation /// …	123 // histone acetyltransferase complex // inferred from sequence or structural similarity /// 124 // SAGA complex // non-traceable author statement /// 5634 // nucleus // inferred from sequence or structural similarity /// 5669 // transcription factor TFIID complex // inferred from sequence or structural similarity /// 5667 // transcription factor complex // inferred from electronic annotation …	---
3061	144260_at	0.67353	2.19617	8.27801	2.12609e-09	3.26249e-08	11.0912	FBgn0028848	CG7311	CG7311	CG7311	34776	4368 // glycerol-3-phosphate dehydrogenase activity // inferred from sequence or structural similarity /// 16491 // oxidoreductase activity // inferred from electronic annotation /// 4368 // glycerol-3-phosphate dehydrogenase activity // inferred from electronic annotation /// 4368 // glycerol-3-phosphate dehydrogenase activity // inferred from sequence similarity	6072 // glycerol-3-phosphate metabolism // inferred from electronic annotation /// 6118 // electron transport // inferred from electronic annotation /// 6629 // lipid metabolism // inferred from electronic annotation	5739 // mitochondrion // inferred from sequence or structural similarity /// 9331 // glycerol-3-phosphate dehydrogenase complex // inferred from electronic annotation /// 5739 // mitochondrion // inferred from sequence similarity	IPR006076 // FAD dependent oxidoreductase // 1.9E-37 /// IPR006076 // FAD dependent oxidoreductase // 5.2E-11
12917	154116_at	0.682346	0.892165	8.27125	2.16438e-09	3.31413e-08	11.0731	FBgn0025803	CG17299	SNF4A	SNF4/AMP-activated protein kinase gamma subunit	42515	4674 // protein serine/threonine kinase activity // non-traceable author statement /// 4679 // AMP-activated protein kinase activity // inferred from sequence or structural similarity /// 4679 // AMP-activated protein kinase activity // non-traceable author statement /// 4702 // receptor signaling protein serine/threonine kinase activity // inferred from electronic annotation /// 16301 // kinase …	6468 // protein amino acid phosphorylation // inferred from sequence or structural similarity /// 6631 // fatty acid metabolism // inferred from electronic annotation /// 6950 // response to stress // inferred from electronic annotation /// 6952 // defense response // inferred from electronic annotation /// 7242 // intracellular signaling cascade // inferred from electronic annotation /// 19220 /…	---	IPR000644 // CBS domain // 1.1E-5 /// IPR000644 // CBS domain // 1.8E-10 /// IPR000644 // CBS domain // 4.7E-9 /// IPR000644 // CBS domain // 6.0E-10 /// IPR000644 // CBS domain // 1.1E-5 /// IPR000644 // CBS domain // 1.8E-10 /// IPR000644 // CBS domain // 4.7E-9 /// IPR000644 // CBS domain // 6.0E-10 /// IPR000644 // CBS domain // 1.1E-5 /// IPR000644 // CBS domain // 1.8E-10 /// IPR000644 // C…
6752	147951_at	1.66092	2.06916	8.26961	2.17374e-09	3.32468e-08	11.0688	FBgn0035176	CG13905	CG13905	CG13905	38107	---	---	---	---
235	141434_at	0.713446	3.61886	8.25883	2.23654e-09	3.41329e-08	11.04	FBgn0035165	CG13887	CG13887	CG13887	38096	5102 // receptor binding // inferred from electronic annotation /// 5515 // protein binding // inferred from physical interaction	6886 // intracellular protein transport // inferred from electronic annotation /// 6915 // apoptosis // inferred from electronic annotation /// 6952 // defense response // inferred from electronic annotation /// 19724 // B cell mediated immunity // inferred from electronic annotation	5783 // endoplasmic reticulum // inferred from electronic annotation /// 16021 // integral to membrane // inferred from electronic annotation	IPR008417 // B-cell receptor-associated 31-like // 1.3E-123
11470	152669_at	1.02466	2.84327	8.2496	2.29173e-09	3.48612e-08	11.0154	FBgn0020385	CG4067	pug	pugilist	41279	4329 // formate-tetrahydrofolate ligase activity // inferred from sequence or structural similarity /// 4477 // methenyltetrahydrofolate cyclohydrolase activity // inferred from sequence or structural similarity /// 4488 // methylenetetrahydrofolate dehydrogenase (NADP+) activity // inferred from sequence or structural similarity /// 5524 // ATP binding // inferred from electronic annotation /// …	8652 // amino acid biosynthesis // inferred from electronic annotation /// 9396 // folic acid and derivative biosynthesis // inferred from electronic annotation /// 105 // histidine biosynthesis // inferred from electronic annotation /// 6164 // purine nucleotide biosynthesis // inferred from electronic annotation /// 6730 // one-carbon compound metabolism // inferred from electronic annotation /…	5737 // cytoplasm // inferred from direct assay	IPR000559 // Formate-tetrahydrofolate ligase, FTHFS // 1.0E-126 /// IPR000672 // Tetrahydrofolate dehydrogenase/cyclohydrolase // 1.0E-80 /// IPR000672 // Tetrahydrofolate dehydrogenase/cyclohydrolase // 4.0E-114 /// IPR000559 // Formate-tetrahydrofolate ligase, FTHFS // 1.0E-126 /// IPR000672 // Tetrahydrofolate dehydrogenase/cyclohydrolase // 1.0E-80 /// IPR000672 // Tetrahydrofolate dehydrogen…
3367	144566_at	0.369229	-0.010188	8.24227	2.33658e-09	3.54279e-08	10.9958	FBgn0029830	CG14447	Grip	Glutamate receptor binding protein	50391	5515 // protein binding // inferred from electronic annotation /// 35254 // glutamate receptor binding // inferred from sequence or structural similarity /// 35254 // glutamate receptor binding // inferred from sequence similarity	16204 // determination of muscle attachment site // inferred from mutant phenotype	---	IPR001478 // PDZ/DHR/GLGF domain // 1.7E-14 /// IPR001478 // PDZ/DHR/GLGF domain // 9.2E-7 /// IPR001478 // PDZ/DHR/GLGF domain // 8.3E-11 /// IPR001478 // PDZ/DHR/GLGF domain // 2.8E-16
5823	147022_at	1.43291	0.752555	8.23322	2.39314e-09	3.60903e-08	10.9717	FBgn0040503	CG7763	CG7763	CG7763	36235	5529 // sugar binding // inferred from electronic annotation	---	---	IPR001304 // C-type lectin // 2.6E-18
3261	144460_at	0.742663	0.587534	8.23038	2.41117e-09	3.63231e-08	10.9641	FBgn0029689	CG6428	CG6428	CG6428	31351	4067 // asparaginase activity // inferred from electronic annotation /// 4622 // lysophospholipase activity // inferred from sequence or structural similarity /// 5515 // protein binding // inferred from physical interaction /// 4622 // lysophospholipase activity // inferred from sequence similarity	9063 // amino acid catabolism // inferred from electronic annotation /// 6520 // amino acid metabolism // inferred from electronic annotation	---	IPR006034 // Asparaginase/glutaminase // 1.2E-53 /// IPR002110 // Ankyrin // 3.8E-11 /// IPR002110 // Ankyrin // 2.1E-4 /// IPR002110 // Ankyrin // 2.7E-5 /// IPR002110 // Ankyrin // 24.0
620	141819_at	0.554409	0.882662	8.22858	2.42269e-09	3.64575e-08	10.9593	---	---	---	---	---	---	---	---	---
4006	145205_at	0.596954	1.92909	8.22534	2.44354e-09	3.67318e-08	10.9506	FBgn0030782	CG18358	CG18358	CG18358	32656	---	---	---	---
3794	144993_at	0.909589	0.355485	8.21793	2.49196e-09	3.74194e-08	10.9308	FBgn0030460	CG2453	CG2453	CG2453	32272	8425 // 2-polyprenyl-6-methoxy-1,4-benzoquinone methyltransferase activity // inferred from sequence or structural similarity /// 8757 // S-adenosylmethionine-dependent methyltransferase activity // inferred from electronic annotation /// 5515 // protein binding // inferred from physical interaction /// 8168 // methyltransferase activity // inferred from electronic annotation /// 16740 // transfe…	9108 // coenzyme biosynthesis // inferred from electronic annotation	---	IPR004033 // UbiE/COQ5 methyltransferase // 2.1E-102
2307	143506_at	0.499372	-3.82235e-05	8.21383	2.51915e-09	3.77373e-08	10.9198	FBgn0004656	CG2252	fs(1)h	female sterile (1) homoeotic	31722	3677 // DNA binding // non-traceable author statement /// 3682 // chromatin binding // inferred from electronic annotation /// 3697 // single-stranded DNA binding // inferred from electronic annotation /// 4672 // protein kinase activity // non-traceable author statement	165 // MAPKKK cascade // inferred from electronic annotation /// 6333 // chromatin assembly or disassembly // inferred from electronic annotation /// 6357 // regulation of transcription from RNA polymerase II promoter // non-traceable author statement /// 7283 // spermatogenesis // inferred from electronic annotation /// 7275 // development // inferred from electronic annotation	16020 // membrane // inferred from electronic annotation /// 16021 // integral to membrane // inferred from electronic annotation	IPR001487 // Bromodomain // 6.5E-45 /// IPR001487 // Bromodomain // 5.7E-40
3215	144414_at	0.519814	1.29625	8.1999	2.61376e-09	3.90392e-08	10.8826	FBgn0040335	CG10260	CG10260	CG10260	31247	4430 // 1-phosphatidylinositol 4-kinase activity // inferred from sequence or structural similarity /// 4430 // 1-phosphatidylinositol 4-kinase activity // non-traceable author statement /// 4428 // inositol or phosphatidylinositol kinase activity // inferred from electronic annotation /// 16301 // kinase activity // inferred from electronic annotation /// 16740 // transferase activity // inferre…	7242 // intracellular signaling cascade // inferred from electronic annotation /// 16310 // phosphorylation // non-traceable author statement	---	IPR000403 // Phosphatidylinositol 3- and 4-kinase // 4.0E-72 /// IPR001263 // Phosphoinositide 3-kinase accessory domain PIK // 2.3E-25
12884	154083_at	0.913682	2.29915	8.19858	2.62294e-09	3.91346e-08	10.8791	FBgn0019890	CG8954	Smg5	Smg5	34804	---	184 // mRNA catabolism, nonsense-mediated decay // inferred from mutant phenotype	---	---
12538	153737_at	0.636195	0.333839	8.19403	2.65473e-09	3.95247e-08	10.8669	FBgn0022772	CG10667	Orc1	Origin recognition complex subunit 1	35686	166 // nucleotide binding // inferred from electronic annotation /// 3677 // DNA binding // non-traceable author statement /// 3688 // DNA replication origin binding // inferred from electronic annotation /// 5524 // ATP binding // inferred from electronic annotation /// 17111 // nucleoside-triphosphatase activity // inferred from electronic annotation /// 3677 // DNA binding // inferred from ele…	74 // regulation of progression through cell cycle // inferred from electronic annotation /// 6261 // DNA-dependent DNA replication // inferred from sequence or structural similarity /// 6261 // DNA-dependent DNA replication // non-traceable author statement /// 6270 // DNA replication initiation // inferred from direct assay /// 6342 // chromatin silencing // non-traceable author statement /// 6…	5634 // nucleus // non-traceable author statement /// 5664 // nuclear origin of replication recognition complex // inferred from direct assay /// 5664 // nuclear origin of replication recognition complex // inferred from sequence or structural similarity /// 5664 // nuclear origin of replication recognition complex // non-traceable author statement /// 5634 // nucleus // inferred from electronic …	IPR003959 // AAA ATPase, central region // 1.5E-16 /// IPR001025 // Bromo adjacent region // 1.2E-25
13483	154682_at	0.640881	1.6285	8.19227	2.66716e-09	3.96677e-08	10.8622	FBgn0052179	CG32179	Krn	Keren	326198	5154 // epidermal growth factor receptor binding // inferred from sequence or structural similarity /// 8083 // growth factor activity // inferred from sequence or structural similarity /// 5154 // epidermal growth factor receptor binding // inferred from sequence similarity /// 8083 // growth factor activity // inferred from sequence similarity	165 // MAPKKK cascade // inferred from direct assay /// 7173 // epidermal growth factor receptor signaling pathway // non-traceable author statement /// 16318 // ommatidial rotation // inferred from mutant phenotype /// 45741 // positive regulation of epidermal growth factor receptor activity // inferred from genetic interaction /// 45741 // positive regulation of epidermal growth factor receptor…	5886 // plasma membrane // inferred from sequence or structural similarity /// 16020 // membrane // inferred from electronic annotation /// 16021 // integral to membrane // inferred from electronic annotation /// 5886 // plasma membrane // inferred from sequence similarity	IPR006209 // EGF-like domain // 2.9E-7
1757	142956_at	0.637428	2.74398	8.18466	2.7215e-09	4.04329e-08	10.8418	FBgn0015571	CG1257	Est3	Esterase-3	40907	4091 // carboxylesterase activity // inferred from sequence or structural similarity /// 4091 // carboxylesterase activity // non-traceable author statement /// 3824 // catalytic activity // inferred from electronic annotation /// 4091 // carboxylesterase activity // inferred from sequence similarity	---	---	IPR002018 // Carboxylesterase, type B // 1.0E-126
12824	154023_at	0.577619	2.81778	8.16954	2.83285e-09	4.19538e-08	10.8013	FBgn0015283	CG7619	Pros54	Proteasome 54kD subunit	40388	4175 // endopeptidase activity // inferred from direct assay /// 4175 // endopeptidase activity // non-traceable author statement /// 5515 // protein binding // inferred from physical interaction	6508 // proteolysis // inferred from direct assay /// 6508 // proteolysis // inferred from sequence or structural similarity /// 6511 // ubiquitin-dependent protein catabolism // non-traceable author statement /// 7059 // chromosome segregation // inferred from mutant phenotype /// 19538 // protein metabolism // inferred from electronic annotation /// 6508 // proteolysis // inferred from sequence…	502 // proteasome complex (sensu Eukaryota) // non-traceable author statement /// 5838 // proteasome regulatory particle (sensu Eukaryota) // inferred from direct assay /// 5838 // proteasome regulatory particle (sensu Eukaryota) // inferred from sequence or structural similarity /// 8540 // proteasome regulatory particle, base subcomplex (sensu Eukaryota) // inferred from sequence or structural …	IPR003903 // Ubiquitin interacting motif // 3.9E-5 /// IPR003903 // Ubiquitin interacting motif // 4.6E-5 /// IPR003903 // Ubiquitin interacting motif // 1.8E-5
3739	144938_at	0.602859	0.595233	8.15829	2.91866e-09	4.31334e-08	10.7712	FBgn0030391	CG1900	Rab40	Rab40	32195	3924 // GTPase activity // inferred from sequence or structural similarity /// 5525 // GTP binding // inferred from electronic annotation /// 166 // nucleotide binding // inferred from electronic annotation /// 3924 // GTPase activity // inferred from sequence similarity	6886 // intracellular protein transport // inferred from electronic annotation /// 6897 // endocytosis // inferred from electronic annotation /// 7242 // intracellular signaling cascade // inferred from electronic annotation /// 7264 // small GTPase mediated signal transduction // inferred from electronic annotation /// 8360 // regulation of cell shape // inferred from mutant phenotype /// 17157 …	16020 // membrane // inferred from electronic annotation	IPR001806 // Ras GTPase superfamily // 2.7E-39 /// IPR001806 // Ras GTPase superfamily // 2.7E-39
12912	154111_at	0.811279	2.16378	8.15423	2.95027e-09	4.34173e-08	10.7603	FBgn0028692	CG11888	Rpn2	Rpn2	43449	4175 // endopeptidase activity // inferred from direct assay /// 30234 // enzyme regulator activity // inferred from electronic annotation /// 5515 // protein binding // inferred from physical interaction /// 5488 // binding // inferred from electronic annotation	74 // regulation of progression through cell cycle // inferred from electronic annotation /// 6508 // proteolysis // inferred from direct assay /// 6508 // proteolysis // inferred from sequence or structural similarity /// 6508 // proteolysis // inferred from sequence similarity	5838 // proteasome regulatory particle (sensu Eukaryota) // inferred from direct assay /// 5838 // proteasome regulatory particle (sensu Eukaryota) // inferred from sequence or structural similarity /// 8540 // proteasome regulatory particle, base subcomplex (sensu Eukaryota) // inferred from sequence or structural similarity /// 8540 // proteasome regulatory particle, base subcomplex (sensu Euka…	IPR002015 // Proteasome/cyclosome, regulatory subunit // 0.02 /// IPR002015 // Proteasome/cyclosome, regulatory subunit // 2.0E-8 /// IPR002015 // Proteasome/cyclosome, regulatory subunit // 6.0E-7 /// IPR002015 // Proteasome/cyclosome, regulatory subunit // 3.3E-8 /// IPR002015 // Proteasome/cyclosome, regulatory subunit // 0.0030 /// IPR002015 // Proteasome/cyclosome, regulatory subunit // 3.6E…
3200	144399_at	0.457051	0.73133	8.15013	2.98258e-09	4.37549e-08	10.7493	FBgn0044047	CG14049	Ilp6	Ilp6	31220	5158 // insulin receptor binding // inferred from sequence or structural similarity /// 5158 // insulin receptor binding // inferred from sequence similarity	8286 // insulin receptor signaling pathway // inferred from sequence or structural similarity /// 8286 // insulin receptor signaling pathway // inferred from sequence similarity	5576 // extracellular region // inferred from sequence or structural similarity /// 5576 // extracellular region // inferred from sequence similarity	---
11182	152381_at	0.672424	1.31274	8.14953	2.98731e-09	4.37576e-08	10.7477	FBgn0020388	CG4107	Pcaf	Pcaf	39431	4402 // histone acetyltransferase activity // inferred from sequence or structural similarity /// 4402 // histone acetyltransferase activity // non-traceable author statement /// 5515 // protein binding // inferred from physical interaction /// 8080 // N-acetyltransferase activity // inferred from electronic annotation /// 4402 // histone acetyltransferase activity // inferred from sequence simil…	6357 // regulation of transcription from RNA polymerase II promoter // inferred from electronic annotation	124 // SAGA complex // inferred from sequence or structural similarity /// 5700 // polytene chromosome // inferred from direct assay /// 124 // SAGA complex // inferred from sequence similarity	IPR000182 // GCN5-related N-acetyltransferase // 9.5E-17 /// IPR001487 // Bromodomain // 6.3E-38 /// IPR009464 // PCAF, N-terminal // 1.0E-126
5572	146771_at	1.43935	2.15418	8.13964	3.06687e-09	4.48038e-08	10.7212	FBgn0033226	CG1882	CG1882	CG1882	35733	3824 // catalytic activity // inferred from electronic annotation /// 16787 // hydrolase activity // inferred from electronic annotation	6725 // aromatic compound metabolism // inferred from electronic annotation	---	IPR000073 // Alpha/beta hydrolase fold // 1.1E-22 /// IPR000073 // Alpha/beta hydrolase fold // 1.1E-22
13253	154452_at	0.835459	3.08502	8.13151	3.13384e-09	4.57345e-08	10.6994	FBgn0040236	CG12132	c11.1	c11.1	53436	5515 // protein binding // inferred from physical interaction /// 5488 // binding // inferred from electronic annotation	---	---	---
11278	152477_at	0.935076	1.66212	8.11655	3.26099e-09	4.73926e-08	10.6592	FBgn0052548	CG32548	CG32548	CG32548	32826	---	---	---	---
3773	144972_at	0.525231	0.574802	8.11249	3.29634e-09	4.78567e-08	10.6483	FBgn0030434	CG4400	CG4400	CG4400	32243	---	---	---	---
13021	154220_at	0.452168	0.425998	8.1048	3.36453e-09	4.87456e-08	10.6276	FBgn0026189	CG7740	prominin-like	prominin-like	38372	---	6886 // intracellular protein transport // inferred from electronic annotation	5886 // plasma membrane // non-traceable author statement /// 16021 // integral to membrane // inferred from electronic annotation /// 16020 // membrane // inferred from electronic annotation	IPR008795 // Prominin // 1.0E-126
4308	145507_at	0.886236	2.37858	8.10104	3.39835e-09	4.91341e-08	10.6175	FBgn0031213	CG11372	galectin	galectin	33162	5102 // receptor binding // inferred from electronic annotation /// 15143 // urate transporter activity // inferred from sequence or structural similarity /// 16936 // galactoside binding // inferred from direct assay /// 16936 // galactoside binding // inferred from sequence or structural similarity /// 5529 // sugar binding // inferred from electronic annotation /// 15143 // urate transporter a…	6917 // induction of apoptosis // inferred from electronic annotation	5829 // cytosol // inferred from direct assay	IPR001079 // Galectin, galactose-binding lectin // 3.2E-19 /// IPR001079 // Galectin, galactose-binding lectin // 3.1E-9
1125	142324_at	0.668133	1.56025	8.07951	3.59879e-09	5.1606e-08	10.5597	FBgn0045761	CG10618	CG10618	CG10618	43067	---	---	---	IPR004119 // Protein of unknown function DUF227 // 8.2E-93
9888	151087_at	0.709465	0.307585	8.07971	3.59689e-09	5.1606e-08	10.5602	FBgn0040602	CG14545	CG14545	CG14545	50075	5515 // protein binding // inferred from physical interaction	---	---	---
4635	145834_at	0.815139	0.477586	8.07082	3.68316e-09	5.2708e-08	10.5363	FBgn0031722	CG14011	CG14011	CG14011	33790	---	---	---	---
13875	155074_at	0.909798	3.11511	8.06992	3.69192e-09	5.27794e-08	10.5339	FBgn0038256	CG7530	CG7530	CG7530	41784	---	---	16021 // integral to membrane // inferred from electronic annotation	IPR004254 // Hly-III related proteins // 1.6E-80
1161	142360_at	0.892631	0.670436	8.05762	3.81502e-09	5.44837e-08	10.5008	FBgn0033887	CG6704	CG6704	CG6704	36548	8146 // sulfotransferase activity // inferred from sequence or structural similarity /// 17051 // retinol dehydratase activity // inferred from sequence or structural similarity /// 8146 // sulfotransferase activity // inferred from sequence similarity /// 17051 // retinol dehydratase activity // inferred from sequence similarity	---	---	IPR000863 // Sulfotransferase // 6.4E-100
2161	143360_at	0.646564	1.52949	8.05544	3.83729e-09	5.47459e-08	10.4949	FBgn0003464	CG1391	sol	small optic lobes	44014	4198 // calpain activity // inferred from sequence or structural similarity /// 5509 // calcium ion binding // inferred from electronic annotation /// 5516 // calmodulin binding // inferred from electronic annotation /// 4197 // cysteine-type endopeptidase activity // inferred from electronic annotation /// 4198 // calpain activity // inferred from electronic annotation /// 8233 // peptidase acti…	6508 // proteolysis // inferred from electronic annotation /// 7398 // ectoderm development // inferred from electronic annotation /// 7399 // nervous system development // inferred from electronic annotation /// 7632 // visual behavior // non-traceable author statement /// 7399 // nervous system development // inferred from mutant phenotype /// 6508 // proteolysis // inferred from sequence or st…	5622 // intracellular // inferred from electronic annotation /// 5737 // cytoplasm // non-traceable author statement /// 5622 // intracellular // inferred from sequence or structural similarity	IPR001300 // Peptidase C2, calpain // 1.0E-126 /// IPR001876 // Zn-finger, Ran-binding // 1.8E-9 /// IPR001876 // Zn-finger, Ran-binding // 7.7E-9 /// IPR001876 // Zn-finger, Ran-binding // 1.7E-8 /// IPR001876 // Zn-finger, Ran-binding // 1.7E-10 /// IPR001876 // Zn-finger, Ran-binding // 5.8E-11 /// IPR001876 // Zn-finger, Ran-binding // 4.2E-9 /// IPR001300 // Peptidase C2, calpain // 1.0E-126…
4641	145840_at	0.438439	-0.239186	8.05223	3.8703e-09	5.51606e-08	10.4863	FBgn0031730	CG7236	CG7236	CG7236	33798	4674 // protein serine/threonine kinase activity // non-traceable author statement /// 4693 // cyclin-dependent protein kinase activity // inferred from sequence or structural similarity /// 4702 // receptor signaling protein serine/threonine kinase activity // inferred from electronic annotation /// 5524 // ATP binding // inferred from electronic annotation /// 4693 // cyclin-dependent protein k…	74 // regulation of progression through cell cycle // inferred from electronic annotation /// 910 // cytokinesis // inferred from mutant phenotype /// 6468 // protein amino acid phosphorylation // inferred from sequence or structural similarity /// 6468 // protein amino acid phosphorylation // non-traceable author statement /// 7169 // transmembrane receptor protein tyrosine kinase signaling path…	---	IPR000719 // Protein kinase // 2.1E-104
3843	145042_at	0.878164	2.35991	8.04818	3.91231e-09	5.55897e-08	10.4754	FBgn0030536	CG11068	CG11068	CG11068	32357	---	---	---	---
12867	154066_at	0.697688	1.24837	8.04825	3.91154e-09	5.55897e-08	10.4755	FBgn0030805	CG9089	wus	wurst	32683	5515 // protein binding // inferred from physical interaction /// 31072 // heat shock protein binding // inferred from electronic annotation /// 51082 // unfolded protein binding // inferred from electronic annotation	7424 // tracheal system development (sensu Insecta) // inferred from mutant phenotype /// 6457 // protein folding // inferred from electronic annotation /// 6605 // protein targeting // inferred from electronic annotation /// 6810 // transport // inferred from electronic annotation /// 15031 // protein transport // inferred from electronic annotation	16020 // membrane // inferred from electronic annotation /// 16021 // integral to membrane // inferred from electronic annotation	IPR001623 // Heat shock protein DnaJ, N-terminal // 1.3E-24
13059	154258_at	0.543594	0.206857	8.03375	4.0659e-09	5.75386e-08	10.4365	FBgn0027951	CG2244	MTA1-like	MTA1-like	40693	3676 // nucleic acid binding // inferred from electronic annotation /// 3677 // DNA binding // inferred from electronic annotation /// 3700 // transcription factor activity // inferred from electronic annotation /// 8270 // zinc ion binding // inferred from electronic annotation /// 43565 // sequence-specific DNA binding // inferred from electronic annotation /// 46872 // metal ion binding // inf…	6355 // regulation of transcription, DNA-dependent // inferred from electronic annotation	118 // histone deacetylase complex // inferred from direct assay /// 5634 // nucleus // inferred from electronic annotation	IPR000679 // Zn-finger, GATA type // 9.3E-11 /// IPR001005 // Myb DNA-binding domain // 1.4E-9 /// IPR000949 // ELM2 domain // 7.8E-26 /// IPR001025 // Bromo adjacent region // 2.0E-7 /// IPR001025 // Bromo adjacent region // 1.2E-10 /// IPR000679 // Zn-finger, GATA type // 9.3E-11 /// IPR001005 // Myb DNA-binding domain // 1.4E-9 /// IPR000949 // ELM2 domain // 7.8E-26 /// IPR001025 // Bromo adj…
13729	154928_at	0.818017	1.33495	8.03165	4.08876e-09	5.78038e-08	10.4308	FBgn0005642	CG1454	wdn	wings down	43398	3676 // nucleic acid binding // inferred from electronic annotation /// 3702 // RNA polymerase II transcription factor activity // inferred from sequence or structural similarity /// 8270 // zinc ion binding // inferred from electronic annotation /// 5515 // protein binding // inferred from physical interaction /// 3677 // DNA binding // inferred from direct assay /// 3677 // DNA binding // infer…	6355 // regulation of transcription, DNA-dependent // non-traceable author statement /// 6357 // regulation of transcription from RNA polymerase II promoter // inferred from electronic annotation /// 8283 // cell proliferation // inferred from electronic annotation /// 6350 // transcription // inferred from electronic annotation /// 6355 // regulation of transcription, DNA-dependent // inferred f…	5634 // nucleus // inferred from sequence or structural similarity /// 5634 // nucleus // non-traceable author statement /// 5634 // nucleus // inferred from direct assay /// 5634 // nucleus // inferred from electronic annotation /// 5634 // nucleus // inferred from sequence similarity	IPR007087 // Zn-finger, C2H2 type // 2.6E-5 /// IPR007087 // Zn-finger, C2H2 type // 2.8E-6 /// IPR007087 // Zn-finger, C2H2 type // 6.0E-6 /// IPR007087 // Zn-finger, C2H2 type // 2.2E-5
12170	153369_at	0.637165	1.64732	8.00711	4.36576e-09	6.14717e-08	10.3646	FBgn0039726	CG7883	eIF2B-	eIF2B-	43549	3743 // translation initiation factor activity // inferred from sequence or structural similarity /// 5525 // GTP binding // inferred from electronic annotation /// 5515 // protein binding // inferred from physical interaction /// 3743 // translation initiation factor activity // inferred from electronic annotation /// 3743 // translation initiation factor activity // inferred from sequence simil…	6413 // translational initiation // inferred from sequence or structural similarity /// 44249 // cellular biosynthesis // inferred from electronic annotation /// 6413 // translational initiation // inferred from sequence similarity	5829 // cytosol // inferred from sequence or structural similarity /// 5851 // eukaryotic translation initiation factor 2B complex // inferred from sequence or structural similarity /// 5829 // cytosol // inferred from sequence similarity /// 5851 // eukaryotic translation initiation factor 2B complex // inferred from sequence similarity	IPR000649 // Initiation factor 2B // 2.7E-59
2838	144037_at	0.844728	2.65315	8.00167	4.42973e-09	6.23098e-08	10.35	FBgn0024957	CG6342	Irp-1B	Iron regulatory protein 1B	41269	3729 // mRNA binding // inferred from sequence or structural similarity /// 3994 // aconitate hydratase activity // inferred from sequence or structural similarity /// 5506 // iron ion binding // inferred from sequence or structural similarity /// 5506 // iron ion binding // non-traceable author statement /// 3723 // RNA binding // inferred from electronic annotation /// 3994 // aconitate hydrata…	6099 // tricarboxylic acid cycle // inferred from electronic annotation /// 6447 // regulation of translational initiation by iron // non-traceable author statement /// 8652 // amino acid biosynthesis // inferred from electronic annotation /// 6508 // proteolysis // inferred from electronic annotation /// 8152 // metabolism // inferred from electronic annotation	16020 // membrane // inferred from electronic annotation	IPR000573 // Aconitate hydratase, C-terminal // 9.5E-56 /// IPR001030 // Aconitate hydratase, N-terminal // 1.0E-126
12801	154000_at	0.569244	2.2906	7.99073	4.56129e-09	6.40317e-08	10.3204	FBgn0027532	CG7139	CG7139	CG7139	40448	3684 // damaged DNA binding // inferred from electronic annotation /// 5524 // ATP binding // inferred from electronic annotation /// 5515 // protein binding // inferred from physical interaction	6298 // mismatch repair // inferred from electronic annotation	---	IPR002625 // Smr protein/MutS2 C-terminal // 2.0E-33 /// IPR002625 // Smr protein/MutS2 C-terminal // 2.0E-33
10978	152177_at	0.89563	2.08828	7.97877	4.70955e-09	6.59808e-08	10.2881	FBgn0027565	CG5498	CG5498	CG5498	40250	---	---	---	IPR005024 // Snf7 // 3.6E-19
11780	152979_at	0.639861	2.33138	7.97512	4.75577e-09	6.65618e-08	10.2783	FBgn0051531	CG31531	CG31531	CG31531	40583	---	---	---	---
8557	149756_at	1.41772	2.01697	7.95255	5.05207e-09	7.02875e-08	10.2173	FBgn0010038	CG4181	GstD2	Glutathione S transferase D2	48335	4364 // glutathione transferase activity // inferred from direct assay /// 4364 // glutathione transferase activity // inferred from sequence or structural similarity /// 4364 // glutathione transferase activity // non-traceable author statement /// 4602 // glutathione peroxidase activity // traceable author statement /// 4364 // glutathione transferase activity // inferred from sequence similari…	6952 // defense response // inferred from electronic annotation /// 9636 // response to toxin // inferred from electronic annotation	---	IPR004046 // Glutathione S-transferase, C-terminal // 8.6E-12 /// IPR004045 // Glutathione S-transferase, N-terminal // 6.4E-18
12682	153881_at	0.664403	0.963091	7.95273	5.04968e-09	7.02875e-08	10.2177	FBgn0035539	CG7447	CG7447	CG7447	38540	5509 // calcium ion binding // inferred from electronic annotation /// 5515 // protein binding // inferred from physical interaction	---	---	IPR006209 // EGF-like domain // 6.7E-5 /// IPR006209 // EGF-like domain // 5.7E-7
2412	143611_at	0.808637	2.04409	7.94318	5.18067e-09	7.19338e-08	10.1919	FBgn0003432	CG1915	sls	sallimus	44013	4687 // myosin light chain kinase activity // inferred from sequence or structural similarity /// 5200 // structural constituent of cytoskeleton // inferred from electronic annotation /// 4687 // myosin light chain kinase activity // inferred from sequence similarity	6139 // nucleobase, nucleoside, nucleotide and nucleic acid metabolism // inferred from electronic annotation /// 6936 // muscle contraction // inferred from electronic annotation /// 7010 // cytoskeleton organization and biogenesis // inferred from electronic annotation /// 7076 // mitotic chromosome condensation // inferred from mutant phenotype /// 7498 // mesoderm development // inferred from…	16020 // membrane // inferred from electronic annotation	IPR010939 // Protein of unknown function DUF1136 // 0.04 /// IPR010939 // Protein of unknown function DUF1136 // 3.4E-12 /// IPR010939 // Protein of unknown function DUF1136 // 0.33 /// IPR010939 // Protein of unknown function DUF1136 // 9.6E-7 /// IPR010939 // Protein of unknown function DUF1136 // 6.5E-4 /// IPR010939 // Protein of unknown function DUF1136 // 5.6E-7 /// IPR010939 // Protein of …
11786	152985_at	0.591025	2.07215	7.94036	5.21995e-09	7.24074e-08	10.1843	FBgn0031310	CG4764	CG4764	CG4764	33295	16787 // hydrolase activity // inferred from electronic annotation /// 5515 // protein binding // inferred from physical interaction	6886 // intracellular protein transport // inferred from electronic annotation	---	IPR004843 // Metallo-phosphoesterase // 2.6E-10
1579	142778_at	0.908705	0.845676	7.92873	5.38529e-09	7.43329e-08	10.1528	FBgn0013432	CG3717	bcn92	bcn92	31186	16651 // oxidoreductase activity, acting on NADH or NADPH // inferred from electronic annotation	6118 // electron transport // inferred from electronic annotation	5743 // mitochondrial inner membrane // inferred from electronic annotation	IPR008011 // Complex 1 LYR protein // 1.9E-23
3084	144283_at	0.613717	-0.199648	7.92908	5.38018e-09	7.43329e-08	10.1538	FBgn0028876	CG16876	CG16876	CG16876	34824	---	---	16020 // membrane // inferred from electronic annotation	---
9581	150780_at	0.66188	1.37968	7.92882	5.38396e-09	7.43329e-08	10.153	FBgn0039593	CG9989	CG9989	CG9989	43390	5515 // protein binding // inferred from physical interaction /// 3676 // nucleic acid binding // inferred from electronic annotation /// 4519 // endonuclease activity // inferred from electronic annotation	---	---	IPR001604 // DNA/RNA non-specific endonuclease // 1.5E-8
5504	146703_at	0.506038	-0.803741	7.9215	5.49082e-09	7.55661e-08	10.1332	FBgn0050158	CG30158	CG30158	CG30158	50149	3924 // GTPase activity // inferred from electronic annotation /// 5525 // GTP binding // inferred from sequence or structural similarity /// 166 // nucleotide binding // inferred from electronic annotation /// 5525 // GTP binding // inferred from electronic annotation /// 5525 // GTP binding // inferred from sequence similarity	7263 // nitric oxide mediated signal transduction // inferred from electronic annotation /// 7264 // small GTPase mediated signal transduction // inferred from electronic annotation /// 15031 // protein transport // inferred from electronic annotation	16020 // membrane // inferred from electronic annotation	IPR001806 // Ras GTPase superfamily // 2.8E-36
10621	151820_at	0.669033	0.54413	7.92099	5.49827e-09	7.55944e-08	10.1318	FBgn0002733 /// FBgn0082739 /// FBgn0082707	CG14548	HLHm /// DsimHLHm /// DyakHLHm	E(spl) region transcript m /// HLHm /// HLHm	43152	3677 // DNA binding // inferred from sequence or structural similarity /// 3677 // DNA binding // non-traceable author statement /// 3700 // transcription factor activity // traceable author statement /// 16564 // transcriptional repressor activity // inferred from sequence or structural similarity /// 16566 // specific transcriptional repressor activity // non-traceable author statement /// 5515…	122 // negative regulation of transcription from RNA polymerase II promoter // inferred from sequence or structural similarity /// 6357 // regulation of transcription from RNA polymerase II promoter // inferred from electronic annotation /// 7219 // Notch signaling pathway // non-traceable author statement /// 7398 // ectoderm development // inferred from electronic annotation /// 7399 // nervous…	5634 // nucleus // Unknown /// 5634 // nucleus // non-traceable author statement /// 5634 // nucleus // inferred from electronic annotation /// 5634 // nucleus // inferred from curator	IPR001092 // Basic helix-loop-helix dimerization domain bHLH // 2.2E-17
3629	144828_at	0.507317	0.82656	7.91624	5.56876e-09	7.64136e-08	10.119	FBgn0003321	CG1664	sbr	small bristles	43944	3729 // mRNA binding // inferred from electronic annotation /// 8565 // protein transporter activity // inferred from electronic annotation /// 5515 // protein binding // inferred from physical interaction /// 5215 // transporter activity // inferred from electronic annotation /// 3723 // RNA binding // inferred from electronic annotation	6406 // mRNA export from nucleus // non-traceable author statement /// 6406 // mRNA export from nucleus // traceable author statement /// 6606 // protein import into nucleus // inferred from electronic annotation /// 7616 // long-term memory // non-traceable author statement /// 16973 // poly(A)+ mRNA export from nucleus // inferred from mutant phenotype /// 30534 // adult behavior // non-traceab…	5635 // nuclear envelope // inferred from direct assay /// 5654 // nucleoplasm // inferred from direct assay /// 5654 // nucleoplasm // non-traceable author statement /// 16020 // membrane // inferred from electronic annotation /// 16021 // integral to membrane // inferred from electronic annotation /// 5622 // intracellular // inferred from electronic annotation /// 5634 // nucleus // inferred f…	IPR005637 // TAP C-terminal domain // 3.4E-38
8556	149755_at	0.842977	3.31261	7.912	5.6325e-09	7.72127e-08	10.1075	FBgn0038020	CG10091	GstD9	Glutathione S transferase D9	41502	4364 // glutathione transferase activity // inferred from direct assay /// 4364 // glutathione transferase activity // inferred from sequence or structural similarity /// 4364 // glutathione transferase activity // inferred from sequence similarity	6952 // defense response // inferred from electronic annotation /// 9636 // response to toxin // inferred from electronic annotation	---	IPR004046 // Glutathione S-transferase, C-terminal // 1.9E-13 /// IPR004045 // Glutathione S-transferase, N-terminal // 6.5E-22
8613	149812_at	0.740014	0.987863	7.91098	5.64808e-09	7.73506e-08	10.1047	FBgn0038106	CG7488	CG7488	CG7488	41597	3924 // GTPase activity // inferred from electronic annotation /// 5525 // GTP binding // inferred from sequence or structural similarity /// 5525 // GTP binding // inferred from sequence similarity	74 // regulation of progression through cell cycle // inferred from electronic annotation	---	---
10953	152152_at	0.574112	1.3505	7.90982	5.66566e-09	7.75156e-08	10.1016	FBgn0027791	CG14789	O-fut2	O-fucosyltransferase 2	31098	4812 // aminoacyl-tRNA ligase activity // inferred from electronic annotation /// 5524 // ATP binding // inferred from electronic annotation /// 8417 // fucosyltransferase activity // inferred from sequence or structural similarity /// 46922 // peptide-O-fucosyltransferase activity // traceable author statement /// 8417 // fucosyltransferase activity // inferred from sequence similarity	6418 // tRNA aminoacylation for protein translation // inferred from electronic annotation /// 16266 // O-glycan processing // traceable author statement /// 6445 // regulation of translation // non-traceable author statement /// 9790 // embryonic development // non-traceable author statement /// 45449 // regulation of transcription // non-traceable author statement	---	---
380	141579_at	0.646608	1.30246	7.90729	5.70423e-09	7.7967e-08	10.0947	FBgn0004374	CG10718	neb	nebbish	35293	3682 // chromatin binding // traceable author statement /// 3777 // microtubule motor activity // inferred from electronic annotation /// 3777 // microtubule motor activity // inferred from sequence or structural similarity /// 5200 // structural constituent of cytoskeleton // inferred from electronic annotation /// 5524 // ATP binding // inferred from electronic annotation /// 8157 // protein ph…	74 // regulation of progression through cell cycle // inferred from mutant phenotype /// 6605 // protein targeting // inferred from electronic annotation /// 6886 // intracellular protein transport // inferred from electronic annotation /// 7018 // microtubule-based movement // inferred from sequence or structural similarity /// 7059 // chromosome segregation // traceable author statement /// 707…	5871 // kinesin complex // inferred from sequence or structural similarity /// 5874 // microtubule // inferred from electronic annotation /// 5875 // microtubule associated complex // inferred from electronic annotation /// 5871 // kinesin complex // inferred from sequence similarity	IPR000253 // Forkhead-associated (FHA) // 1.2E-12 /// IPR001752 // Kinesin, motor region // 1.0E-126
11836	153035_at	0.422077	0.877769	7.90261	5.77647e-09	7.88007e-08	10.082	FBgn0030028	CG10965	Corp	Companion of reaper	31764	5515 // protein binding // inferred from physical interaction	8630 // DNA damage response, signal transduction resulting in induction of apoptosis // non-traceable author statement	---	---
5791	146990_at	0.649067	0.2182	7.89354	5.91894e-09	8.05873e-08	10.0574	FBgn0033592	CG13215	CG13215	CG13215	36182	---	---	---	---
8076	149275_at	0.502815	2.71559	7.89236	5.93766e-09	8.07638e-08	10.0542	FBgn0037239	CG11739	CG11739	CG11739	40552	5371 // tricarboxylate carrier activity // inferred from sequence or structural similarity /// 8324 // cation transporter activity // inferred from electronic annotation /// 5371 // tricarboxylate carrier activity // inferred from sequence similarity	6812 // cation transport // inferred from electronic annotation	16020 // membrane // inferred from electronic annotation	IPR004686 // Tricarboxylate/iron carrier // 1.0E-126
5165	146364_at	1.29139	0.585142	7.87251	6.26307e-09	8.49425e-08	10.0004	FBgn0032587	CG5953	CG5953	CG5953	34985	5515 // protein binding // inferred from physical interaction /// 42802 // identical protein binding // inferred from physical interaction	---	---	---
13510	154709_at	0.847472	1.79702	7.86289	6.42731e-09	8.675e-08	9.97428	FBgn0030321	CG1703	CG1703	CG1703	32112	166 // nucleotide binding // inferred from electronic annotation /// 5215 // transporter activity // inferred from sequence or structural similarity /// 5524 // ATP binding // inferred from electronic annotation /// 42626 // ATPase activity, coupled to transmembrane movement of substances // inferred from sequence or structural similarity /// 16887 // ATPase activity // inferred from electronic a…	6810 // transport // inferred from electronic annotation	43190 // ATP-binding cassette (ABC) transporter complex // inferred from sequence or structural similarity /// 16020 // membrane // inferred from electronic annotation /// 43190 // ATP-binding cassette (ABC) transporter complex // inferred from sequence similarity	IPR003439 // ABC transporter // 8.8E-31 /// IPR003439 // ABC transporter // 3.3E-40 /// IPR003439 // ABC transporter // 2.3E-24 /// IPR003439 // ABC transporter // 3.3E-40
2179	143378_at	0.563815	0.405159	7.84217	6.79591e-09	9.13731e-08	9.91801	FBgn0003719	CG6868	tld	tolloid	42945	4222 // metalloendopeptidase activity // non-traceable author statement /// 5509 // calcium ion binding // inferred from electronic annotation /// 8270 // zinc ion binding // inferred from electronic annotation /// 8533 // astacin activity // inferred from electronic annotation /// 17026 // procollagen C-endopeptidase activity // inferred from sequence or structural similarity /// 5515 // protein…	6508 // proteolysis // non-traceable author statement /// 7352 // zygotic determination of dorsal/ventral axis // non-traceable author statement /// 7362 // terminal region determination // inferred from genetic interaction /// 7378 // amnioserosa formation // non-traceable author statement /// 8293 // torso signaling pathway // inferred from genetic interaction /// 9880 // embryonic pattern spec…	5576 // extracellular region // non-traceable author statement	IPR001506 // Peptidase M12A, astacin // 4.6E-113 /// IPR006209 // EGF-like domain // 2.1E-7 /// IPR006209 // EGF-like domain // 1.7E-9 /// IPR000859 // CUB // 1.7E-47 /// IPR000859 // CUB // 1.4E-62 /// IPR000859 // CUB // 7.7E-55 /// IPR000859 // CUB // 2.1E-56 /// IPR000859 // CUB // 1.2E-49
10823	152022_at	0.464087	1.17104	7.80272	7.55835e-09	1.0085e-07	9.81072	FBgn0037688	CG9356	CG9356	CG9356	41122	5515 // protein binding // inferred from physical interaction	---	---	---
10024	151223_at	1.08722	4.3078	7.79833	7.64843e-09	1.01858e-07	9.79876	FBgn0040747	CG12853	CG12853	CG12853	50220	---	---	---	---
1650	142849_at	0.34108	0.178569	7.76742	8.31418e-09	1.10305e-07	9.71455	FBgn0032812	CG10263	CG10263	CG10263	35256	5515 // protein binding // inferred from physical interaction /// 5515 // protein binding // inferred from electronic annotation /// 8270 // zinc ion binding // inferred from electronic annotation /// 46872 // metal ion binding // inferred from electronic annotation	---	---	---
4481	145680_at	0.786449	1.93885	7.76224	8.43142e-09	1.11608e-07	9.70043	FBgn0051694	CG31694	CG31694	CG31694	33489	5102 // receptor binding // inferred from electronic annotation /// 16787 // hydrolase activity // inferred from electronic annotation /// 16799 // hydrolase activity, hydrolyzing N-glycosyl compounds // inferred from electronic annotation	7275 // development // inferred from electronic annotation /// 7398 // ectoderm development // inferred from electronic annotation /// 7399 // nervous system development // inferred from electronic annotation	---	IPR006921 // Interferon-related protein conserved region // 1.4E-16 /// IPR007701 // Interferon-related developmental regulator // 1.0E-126
6546	147745_at	0.51594	1.31056	7.74833	8.75449e-09	1.15165e-07	9.66249	FBgn0034824	CG3219	Klp59C	Klp59C	37671	3774 // motor activity // inferred from direct assay /// 3777 // microtubule motor activity // inferred from sequence or structural similarity /// 5200 // structural constituent of cytoskeleton // inferred from electronic annotation /// 5524 // ATP binding // inferred from electronic annotation /// 166 // nucleotide binding // inferred from electronic annotation /// 3774 // motor activity // infe…	70 // mitotic sister chromatid segregation // inferred from mutant phenotype /// 6605 // protein targeting // inferred from electronic annotation /// 7018 // microtubule-based movement // inferred from sequence or structural similarity /// 7018 // microtubule-based movement // inferred from electronic annotation /// 7018 // microtubule-based movement // inferred from sequence similarity	5828 // kinetochore microtubule // inferred from direct assay /// 5871 // kinesin complex // inferred from sequence or structural similarity /// 5874 // microtubule // inferred from electronic annotation /// 5875 // microtubule associated complex // inferred from electronic annotation /// 5871 // kinesin complex // inferred from sequence similarity	IPR001752 // Kinesin, motor region // 1.0E-126
1926	143125_at	0.701589	2.23605	7.74668	8.7937e-09	1.15464e-07	9.65798	FBgn0000462	CG6667	dl	dorsal	35047	3677 // DNA binding // non-traceable author statement /// 3700 // transcription factor activity // inferred from sequence or structural similarity /// 3700 // transcription factor activity // non-traceable author statement /// 3702 // RNA polymerase II transcription factor activity // traceable author statement /// 5515 // protein binding // inferred from physical interaction /// 16015 // morphog…	122 // negative regulation of transcription from RNA polymerase II promoter // traceable author statement /// 381 // regulation of alternative nuclear mRNA splicing, via spliceosome // inferred from mutant phenotype /// 1715 // ectodermal cell fate specification // traceable author statement /// 6355 // regulation of transcription, DNA-dependent // inferred from sequence or structural similarity …	5634 // nucleus // Unknown /// 5634 // nucleus // inferred from direct assay /// 5634 // nucleus // non-traceable author statement /// 5634 // nucleus // traceable author statement /// 5737 // cytoplasm // inferred from direct assay /// 5737 // cytoplasm // non-traceable author statement /// 5737 // cytoplasm // traceable author statement /// 5634 // nucleus // inferred from electronic annotation…	IPR000451 // NF-kappa-B/Rel/dorsal // 5.1E-105 /// IPR002909 // Cell surface receptor IPT/TIG // 2.4E-17
8480	149679_at	0.605774	1.7341	7.73907	8.97654e-09	1.17644e-07	9.63722	FBgn0037883	CG14701	CG14701	CG14701	41352	8270 // zinc ion binding // inferred from electronic annotation /// 46872 // metal ion binding // inferred from electronic annotation	---	---	IPR007872 // CSL zinc finger // 2.9E-33
11792	152991_at	0.658925	2.32733	7.72503	9.3242e-09	1.21972e-07	9.59889	FBgn0026173	CG5186	slim	scruin like at the midline	37121	---	---	---	IPR006652 // Kelch repeat // 7.4E-4 /// IPR006652 // Kelch repeat // 4.0E-6 /// IPR006652 // Kelch repeat // 0.0012 /// IPR006652 // Kelch repeat // 0.024 /// IPR006652 // Kelch repeat // 7.4E-4 /// IPR006652 // Kelch repeat // 4.0E-6 /// IPR006652 // Kelch repeat // 0.0012 /// IPR006652 // Kelch repeat // 0.024
4241	145440_at	0.847865	1.40628	7.71849	9.49069e-09	1.23803e-07	9.58103	FBgn0031130	CG15452	CG15452	CG15452	33061	---	---	---	---
9217	150416_at	0.558976	0.530726	7.71605	9.55349e-09	1.24506e-07	9.57438	FBgn0039044	CG33336	p53	p53	2768677	3677 // DNA binding // non-traceable author statement /// 3700 // transcription factor activity // non-traceable author statement /// 3702 // RNA polymerase II transcription factor activity // traceable author statement /// 5515 // protein binding // inferred from physical interaction /// 3677 // DNA binding // inferred from electronic annotation /// 3700 // transcription factor activity // infer…	6357 // regulation of transcription from RNA polymerase II promoter // traceable author statement /// 6915 // apoptosis // traceable author statement /// 6974 // response to DNA damage stimulus // inferred from mutant phenotype /// 8219 // cell death // inferred from mutant phenotype /// 8630 // DNA damage response, signal transduction resulting in induction of apoptosis // traceable author state…	5634 // nucleus // Unknown /// 5634 // nucleus // inferred from electronic annotation /// 5634 // nucleus // inferred from curator	---
7440	148639_at	0.661372	4.5425	7.71258	9.64372e-09	1.25565e-07	9.5649	FBgn0036262	CG6910	CG6910	CG6910	39391	16491 // oxidoreductase activity // inferred from electronic annotation	5975 // carbohydrate metabolism // inferred from electronic annotation /// 6139 // nucleobase, nucleoside, nucleotide and nucleic acid metabolism // inferred from electronic annotation	---	IPR007828 // Protein of unknown function DUF706 // 1.0E-126
10176	151375_at	0.923585	1.75898	7.69834	1.00232e-08	1.29902e-07	9.52597	FBgn0040904	CG15577	CG15577	CG15577	50378	---	---	---	---
2463	143662_at	0.620233	1.6019	7.69588	1.00903e-08	1.30652e-07	9.51923	FBgn0011573	CG12019	Cdc37	Cdc37	38232	30296 // protein tyrosine kinase activator activity // non-traceable author statement /// 51082 // unfolded protein binding // inferred from sequence or structural similarity /// 51087 // chaperone binding // non-traceable author statement /// 51082 // unfolded protein binding // inferred from sequence similarity	74 // regulation of progression through cell cycle // inferred from electronic annotation /// 6457 // protein folding // inferred from electronic annotation /// 7169 // transmembrane receptor protein tyrosine kinase signaling pathway // non-traceable author statement /// 7243 // protein kinase cascade // non-traceable author statement	5737 // cytoplasm // inferred from direct assay	IPR004918 // Cdc37 family // 1.0E-126
11827	153026_at	0.727528	2.97714	7.69428	1.01342e-08	1.31098e-07	9.51486	FBgn0033383	CG8057	CG8057	CG8057	35931	4679 // AMP-activated protein kinase activity // inferred from sequence or structural similarity /// 4702 // receptor signaling protein serine/threonine kinase activity // inferred from electronic annotation /// 4679 // AMP-activated protein kinase activity // inferred from sequence similarity	6468 // protein amino acid phosphorylation // inferred from electronic annotation	---	IPR006828 // 5-AMP-activated protein kinase, beta subunit, complex-interacting region // 4.7E-49 /// IPR006828 // 5-AMP-activated protein kinase, beta subunit, complex-interacting region // 4.7E-49
8989	150188_at	0.585589	2.41293	7.6776	1.0603e-08	1.36407e-07	9.46925	FBgn0038697	CG3581	CG3581	CG3581	42315	3676 // nucleic acid binding // inferred from electronic annotation /// 3677 // DNA binding // inferred from electronic annotation /// 4386 // helicase activity // inferred from electronic annotation /// 5524 // ATP binding // inferred from electronic annotation	---	---	---
12739	153938_at	1.00668	2.47274	7.66877	1.08601e-08	1.39587e-07	9.44508	FBgn0010715	CG10967	Atg1	Autophagy-specific gene 1	39454	4672 // protein kinase activity // non-traceable author statement /// 4674 // protein serine/threonine kinase activity // inferred from sequence or structural similarity /// 4702 // receptor signaling protein serine/threonine kinase activity // inferred from electronic annotation /// 4713 // protein-tyrosine kinase activity // inferred from electronic annotation /// 5524 // ATP binding // inferre…	6468 // protein amino acid phosphorylation // non-traceable author statement /// 6914 // autophagy // inferred from mutant phenotype /// 7242 // intracellular signaling cascade // inferred from electronic annotation /// 6468 // protein amino acid phosphorylation // inferred from electronic annotation	---	IPR000719 // Protein kinase // 1.5E-80
1158	142357_at	0.545668	1.3048	7.66286	1.10355e-08	1.41582e-07	9.42891	FBgn0026090	CG14812	CG14812	CG14812	31137	---	---	---	---
3110	144309_at	0.359336	0.61947	7.64893	1.14609e-08	1.46503e-07	9.39077	FBgn0028919	CG16865	CG16865	CG16865	34788	5515 // protein binding // inferred from physical interaction	---	---	---
342	141541_at	0.949327	6.0223	7.64729	1.15121e-08	1.47024e-07	9.38627	FBgn0034501	CG13868	CG13868	CG13868	37302	---	---	---	---
10583	151782_at	0.673271	2.07662	7.64299	1.16475e-08	1.48482e-07	9.37448	FBgn0033669	CG8979	CG8979	CG8979	36277	8539 // proteasome inhibitor activity // inferred from sequence or structural similarity /// 8539 // proteasome inhibitor activity // non-traceable author statement /// 5515 // protein binding // inferred from physical interaction /// 8539 // proteasome inhibitor activity // inferred from sequence similarity	---	5829 // cytosol // inferred from electronic annotation /// 43234 // protein complex // inferred from electronic annotation	---
12764	153963_at	0.773982	1.75649	7.6377	1.1816e-08	1.50492e-07	9.35999	FBgn0053229	CG33229	CG33229	CG33229	2768996	---	---	---	---
1862	143061_at	1.50191	2.37573	7.62799	1.21321e-08	1.54379e-07	9.33336	FBgn0000047	CG5178	Act88F	Actin 88F	41885	5200 // structural constituent of cytoskeleton // inferred from sequence or structural similarity /// 5200 // structural constituent of cytoskeleton // inferred from sequence similarity	7010 // cytoskeleton organization and biogenesis // inferred from sequence or structural similarity /// 7010 // cytoskeleton organization and biogenesis // inferred from sequence similarity	5884 // actin filament // inferred from sequence or structural similarity /// 5884 // actin filament // non-traceable author statement /// 5884 // actin filament // inferred from sequence similarity	IPR004000 // Actin/actin-like // 1.0E-126
12681	153880_at	1.03318	3.02048	7.62034	1.2387e-08	1.57194e-07	9.31239	FBgn0026380	CG11981	Pros3	Pros3	41079	4175 // endopeptidase activity // inferred from sequence or structural similarity /// 4175 // endopeptidase activity // non-traceable author statement /// 5515 // protein binding // inferred from physical interaction /// 4175 // endopeptidase activity // inferred from electronic annotation /// 4298 // threonine endopeptidase activity // inferred from electronic annotation /// 8233 // peptidase ac…	6510 // ATP-dependent proteolysis // non-traceable author statement /// 6511 // ubiquitin-dependent protein catabolism // inferred from electronic annotation	502 // proteasome complex (sensu Eukaryota) // non-traceable author statement /// 5839 // proteasome core complex (sensu Eukaryota) // inferred from sequence or structural similarity /// 5634 // nucleus // inferred from electronic annotation /// 5829 // cytosol // inferred from electronic annotation /// 5839 // proteasome core complex (sensu Eukaryota) // inferred from electronic annotation /// 4…	IPR001353 // Peptidase T1, 20S proteasome // 2.3E-52
11531	152730_at	0.543089	1.59188	7.61828	1.24568e-08	1.57692e-07	9.30673	FBgn0038344	CG5205	CG5205	CG5205	41891	166 // nucleotide binding // inferred from electronic annotation /// 3724 // RNA helicase activity // inferred from sequence or structural similarity /// 4386 // helicase activity // inferred from sequence or structural similarity /// 5524 // ATP binding // inferred from electronic annotation /// 8026 // ATP-dependent helicase activity // inferred from electronic annotation /// 17111 // nucleosid…	398 // nuclear mRNA splicing, via spliceosome // inferred from sequence or structural similarity /// 398 // nuclear mRNA splicing, via spliceosome // inferred from sequence similarity	5682 // snRNP U5 // inferred from sequence or structural similarity /// 30532 // small nuclear ribonucleoprotein complex // inferred from sequence or structural similarity /// 5682 // snRNP U5 // inferred from sequence similarity /// 30532 // small nuclear ribonucleoprotein complex // inferred from sequence similarity	IPR001650 // Helicase, C-terminal // 8.4E-9 /// IPR001650 // Helicase, C-terminal // 2.0E-11 /// IPR001410 // DEAD/DEAH box helicase // 1.2E-46 /// IPR001410 // DEAD/DEAH box helicase // 1.3E-43 /// IPR004179 // Sec63 domain // 1.0E-126 /// IPR004179 // Sec63 domain // 1.0E-126
13861	155060_at	0.487053	1.65614	7.61818	1.246e-08	1.57692e-07	9.30647	FBgn0037624	CG8223	CG8223	CG8223	41045	5515 // protein binding // inferred from physical interaction /// 5488 // binding // inferred from electronic annotation	---	---	---
4989	146188_at	0.421286	0.708361	7.60724	1.28364e-08	1.61214e-07	9.27646	FBgn0032293	CG6444	CG6444	CG6444	34480	---	---	---	IPR007858 // Dpy-30 // 1.1E-22
8524	149723_at	0.700735	1.25927	7.60708	1.28419e-08	1.61214e-07	9.27602	FBgn0037974	CG12224	CG12224	CG12224	41453	16491 // oxidoreductase activity // inferred from sequence or structural similarity /// 16491 // oxidoreductase activity // inferred from sequence similarity	---	---	IPR001395 // Aldo/keto reductase // 2.9E-12
2173	143372_at	0.367107	0.307517	7.6058	1.28867e-08	1.61631e-07	9.27251	FBgn0003651	CG11502	svp	seven up	41491	3700 // transcription factor activity // inferred from sequence or structural similarity /// 3707 // steroid hormone receptor activity // inferred from electronic annotation /// 4872 // receptor activity // non-traceable author statement /// 4872 // receptor activity // traceable author statement /// 4879 // ligand-dependent nuclear receptor activity // inferred from sequence or structural simila…	1700 // embryonic development (sensu Insecta) // non-traceable author statement /// 6357 // regulation of transcription from RNA polymerase II promoter // inferred from electronic annotation /// 7165 // signal transduction // inferred from electronic annotation /// 7270 // nerve-nerve synaptic transmission // inferred from mutant phenotype /// 7417 // central nervous system development // non-tra…	5634 // nucleus // inferred from sequence or structural similarity /// 5634 // nucleus // non-traceable author statement /// 5737 // cytoplasm // inferred from direct assay /// 5634 // nucleus // inferred from electronic annotation /// 5634 // nucleus // inferred from sequence similarity	IPR000536 // Ligand-binding domain of nuclear hormone receptor // 2.8E-29 /// IPR001628 // Zn-finger, C4-type steroid receptor // 4.6E-55 /// IPR000536 // Ligand-binding domain of nuclear hormone receptor // 6.5E-61 /// IPR000536 // Ligand-binding domain of nuclear hormone receptor // 6.5E-61
355	141554_at	0.788736	2.21073	7.59969	1.31029e-08	1.63903e-07	9.25573	FBgn0035024	CG11414	CG11414	CG11414	37923	3676 // nucleic acid binding // inferred from electronic annotation /// 4842 // ubiquitin-protein ligase activity // inferred from electronic annotation /// 8270 // zinc ion binding // inferred from electronic annotation /// 5515 // protein binding // inferred from electronic annotation	16567 // protein ubiquitination // inferred from electronic annotation	151 // ubiquitin ligase complex // inferred from electronic annotation /// 5634 // nucleus // inferred from electronic annotation	IPR007087 // Zn-finger, C2H2 type // 1.9E-4
4031	145230_at	2.516	2.92269	7.59979	1.30995e-08	1.63903e-07	9.256	FBgn0030821	CG5010	CG5010	CG5010	32701	---	---	---	IPR010625 // CHCH // 8.7E-11
12496	153695_at	1.33303	0.200086	7.59585	1.32405e-08	1.65458e-07	9.2452	FBgn0030878	CG6769	CG6769	CG6769	32770	3676 // nucleic acid binding // inferred from electronic annotation /// 8270 // zinc ion binding // inferred from electronic annotation /// 5515 // protein binding // inferred from physical interaction	---	5634 // nucleus // inferred from electronic annotation	---
2028	143227_at	0.510139	2.67793	7.59447	1.32905e-08	1.65658e-07	9.24139	FBgn0002431	CG9484	hyd	hyperplastic discs	41181	4842 // ubiquitin-protein ligase activity // inferred from sequence or structural similarity /// 4842 // ubiquitin-protein ligase activity // non-traceable author statement /// 4842 // ubiquitin-protein ligase activity // inferred from electronic annotation /// 8270 // zinc ion binding // inferred from electronic annotation /// 16874 // ligase activity // inferred from electronic annotation /// 4…	6512 // ubiquitin cycle // inferred from physical interaction /// 6512 // ubiquitin cycle // inferred from sequence or structural similarity /// 6512 // ubiquitin cycle // non-traceable author statement /// 7281 // germ cell development // non-traceable author statement /// 7283 // spermatogenesis // inferred from mutant phenotype /// 7444 // imaginal disc development // inferred from mutant phen…	5634 // nucleus // inferred from direct assay /// 5634 // nucleus // non-traceable author statement /// 5737 // cytoplasm // inferred from direct assay /// 5622 // intracellular // inferred from electronic annotation /// 5634 // nucleus // inferred from electronic annotation	IPR002004 // Polyadenylate-binding protein/HECT-associated // 3.6E-51 /// IPR000569 // HECT domain (Ubiquitin-protein ligase) // 1.0E-126 /// IPR003126 // Zn-finger (putative), N-recognin // 1.8E-28
214	141413_at	0.73123	2.83066	7.59302	1.33431e-08	1.66166e-07	9.23741	FBgn0038364	CG4699	CG4699	CG4699	41911	---	---	---	---
2755	143954_at	0.689729	0.570739	7.58085	1.37927e-08	1.71157e-07	9.20399	FBgn0022338	CG5452	dnk	deoxyribonucleoside kinase	42273	4797 // thymidine kinase activity // inferred from sequence or structural similarity /// 5524 // ATP binding // inferred from electronic annotation /// 16773 // phosphotransferase activity, alcohol group as acceptor // inferred from electronic annotation /// 19136 // deoxynucleoside kinase activity // inferred from direct assay /// 19136 // deoxynucleoside kinase activity // non-traceable author …	6165 // nucleoside diphosphate phosphorylation // inferred from direct assay /// 6206 // pyrimidine base metabolism // inferred from electronic annotation /// 6230 // TMP biosynthesis // inferred from sequence or structural similarity /// 16310 // phosphorylation // non-traceable author statement /// 6139 // nucleobase, nucleoside, nucleotide and nucleic acid metabolism // inferred from electroni…	5739 // mitochondrion // inferred from sequence or structural similarity /// 5739 // mitochondrion // inferred from sequence similarity	IPR002624 // Deoxynucleoside kinase // 2.5E-28
13642	154841_at	0.494574	2.11211	7.57209	1.41255e-08	1.74822e-07	9.17995	FBgn0030435	CG4645	CG4645	CG4645	32244	---	---	---	IPR006977 // Protein of unknown function DUF649 // 2.0E-71
12328	153527_at	1.18964	2.33058	7.57148	1.41492e-08	1.74961e-07	9.17826	FBgn0030309	CG1572	CG1572	CG1572	32098	---	---	16020 // membrane // inferred from electronic annotation	IPR008253 // Marvel // 1.7E-31
3922	145121_at	0.579563	0.651322	7.5654	1.43855e-08	1.77726e-07	9.16156	FBgn0030641	CG6299	CG6299	CG6299	32475	---	46836 // glycolipid transport // inferred from sequence or structural similarity /// 46836 // glycolipid transport // inferred from sequence similarity	---	---
10565	151764_at	0.459325	1.38275	7.56319	1.44727e-08	1.78645e-07	9.15546	FBgn0038693	CG5237	CG5237	CG5237	42310	---	---	---	---
10918	152117_at	0.584916	0.268167	7.55626	1.47487e-08	1.81731e-07	9.13642	FBgn0026373	CG7885	RpII33	RNA polymerase II 33kD subunit	34796	3676 // nucleic acid binding // inferred from electronic annotation /// 3677 // DNA binding // inferred from electronic annotation /// 3899 // DNA-directed RNA polymerase activity // inferred from sequence or structural similarity /// 3899 // DNA-directed RNA polymerase activity // non-traceable author statement /// 46983 // protein dimerization activity // inferred from electronic annotation ///…	6366 // transcription from RNA polymerase II promoter // inferred from sequence or structural similarity /// 9299 // mRNA transcription // inferred from electronic annotation /// 6350 // transcription // inferred from electronic annotation /// 6366 // transcription from RNA polymerase II promoter // inferred from sequence similarity	5665 // DNA-directed RNA polymerase II, core complex // inferred from sequence or structural similarity /// 5665 // DNA-directed RNA polymerase II, core complex // inferred from sequence similarity	IPR001700 // RNA polymerase, alpha chain, bacterial and organelle // 6.1E-54 /// IPR008193 // DNA-directed RNA polymerase, 13 to 16 kDa subunit // 6.9E-22 /// IPR001700 // RNA polymerase, alpha chain, bacterial and organelle // 1.2E-14 /// IPR008193 // DNA-directed RNA polymerase, 13 to 16 kDa subunit // 4.7E-15
12609	153808_at	0.491819	-0.399608	7.55568	1.47718e-08	1.81841e-07	9.13484	FBgn0035249	CG17249	CG17249	CG17249	38201	---	---	---	---
11984	153183_at	0.734067	3.09107	7.55003	1.50013e-08	1.84036e-07	9.11929	FBgn0010590	CG8392	l(2)05070	lethal (2) 05070	46058	4175 // endopeptidase activity // inferred from sequence or structural similarity /// 4175 // endopeptidase activity // inferred from electronic annotation /// 4298 // threonine endopeptidase activity // inferred from electronic annotation /// 8233 // peptidase activity // inferred from electronic annotation /// 16787 // hydrolase activity // inferred from electronic annotation /// 4175 // endope…	6508 // proteolysis // inferred from electronic annotation /// 6511 // ubiquitin-dependent protein catabolism // inferred from electronic annotation	5839 // proteasome core complex (sensu Eukaryota) // inferred from sequence or structural similarity /// 5829 // cytosol // inferred from electronic annotation /// 5839 // proteasome core complex (sensu Eukaryota) // inferred from electronic annotation /// 43234 // protein complex // inferred from electronic annotation /// 5839 // proteasome core complex (sensu Eukaryota) // inferred from sequenc…	IPR001353 // Peptidase T1, 20S proteasome // 6.8E-67
11155	152354_at	0.929547	2.48728	7.54783	1.50917e-08	1.84982e-07	9.11324	FBgn0039714	CG7816	CG7816	CG7816	43533	46873 // metal ion transporter activity // inferred from electronic annotation	30001 // metal ion transport // inferred from electronic annotation	16021 // integral to membrane // non-traceable author statement /// 16020 // membrane // inferred from electronic annotation	IPR003689 // Zinc transporter ZIP // 3.5E-102
13218	154417_at	0.564184	0.821828	7.53818	1.54943e-08	1.8942e-07	9.08669	FBgn0028341	CG32697	l(1)G0232	lethal (1) G0232	31907	1584 // rhodopsin-like receptor activity // inferred from electronic annotation /// 4725 // protein tyrosine phosphatase activity // non-traceable author statement /// 4726 // non-membrane spanning protein tyrosine phosphatase activity // inferred from sequence or structural similarity /// 5215 // transporter activity // inferred from electronic annotation /// 4721 // phosphoprotein phosphatase a…	6470 // protein amino acid dephosphorylation // non-traceable author statement /// 6810 // transport // inferred from electronic annotation /// 7186 // G-protein coupled receptor protein signaling pathway // inferred from electronic annotation /// 6470 // protein amino acid dephosphorylation // inferred from electronic annotation	5622 // intracellular // inferred from electronic annotation /// 16021 // integral to membrane // inferred from electronic annotation	IPR001251 // Cellular retinaldehyde-binding)/triple function, C-terminal // 1.5E-29 /// IPR000242 // Tyrosine specific protein phosphatase // 1.0E-126 /// IPR001251 // Cellular retinaldehyde-binding)/triple function, C-terminal // 4.6E-19 /// IPR000242 // Tyrosine specific protein phosphatase // 1.0E-126 /// IPR000242 // Tyrosine specific protein phosphatase // 1.0E-126 /// IPR001251 // Cellular …
12339	153538_at	0.434932	2.23184	7.52551	1.60396e-08	1.95574e-07	9.05182	FBgn0033717	CG8839	CG8839	CG8839	36340	17064 // fatty acid amide hydrolase activity // inferred from sequence or structural similarity /// 4040 // amidase activity // inferred from electronic annotation /// 17064 // fatty acid amide hydrolase activity // inferred from sequence similarity	6807 // nitrogen compound metabolism // inferred from electronic annotation	---	IPR000120 // Amidase // 1.8E-56 /// IPR000120 // Amidase // 1.7E-15
7285	148484_at	1.45247	3.43151	7.52466	1.60766e-08	1.95855e-07	9.04949	FBgn0036030	CG6767	CG6767	CG6767	39132	4749 // ribose phosphate diphosphokinase activity // inferred from sequence or structural similarity /// 16978 // lipoate-protein ligase B activity // inferred from electronic annotation /// 19201 // nucleotide kinase activity // inferred from electronic annotation /// 5515 // protein binding // inferred from physical interaction /// 42802 // identical protein binding // inferred from physical in…	6144 // purine base metabolism // inferred from electronic annotation /// 6206 // pyrimidine base metabolism // inferred from electronic annotation /// 9116 // nucleoside metabolism // inferred from electronic annotation /// 9156 // ribonucleoside monophosphate biosynthesis // inferred from electronic annotation /// 9165 // nucleotide biosynthesis // inferred from electronic annotation	---	IPR000836 // Phosphoribosyltransferase // 4.6E-38 /// IPR000836 // Phosphoribosyltransferase // 4.6E-38
4033	145232_at	0.347148	-0.0449939	7.52131	1.62243e-08	1.9714e-07	9.04027	FBgn0030824	CG5070	CG5070	CG5070	32705	---	---	---	---
479	141678_at	0.653158	1.90076	7.51123	1.66773e-08	2.02469e-07	9.01251	FBgn0030318	CG1697	rho-4	rhomboid-4	32109	5057 // receptor signaling protein activity // inferred from electronic annotation /// 5102 // receptor binding // inferred from electronic annotation /// 5509 // calcium ion binding // inferred from electronic annotation /// 8236 // serine-type peptidase activity // non-traceable author statement	7292 // female gamete generation // inferred from electronic annotation /// 7398 // ectoderm development // inferred from electronic annotation /// 7399 // nervous system development // inferred from electronic annotation	5886 // plasma membrane // non-traceable author statement /// 16021 // integral to membrane // non-traceable author statement	IPR002048 // Calcium-binding EF-hand // 5.0E-5 /// IPR002048 // Calcium-binding EF-hand // 1.4E-4 /// IPR002610 // Peptidase S54, rhomboid-like protein // 1.0E-34
12048	153247_at	0.421579	1.30484	7.50417	1.7002e-08	2.06054e-07	8.99307	FBgn0021856	CG8674	l(2)k14505	lethal (2) k14505	35399	---	---	---	---
13605	154804_at	0.574888	2.14816	7.5035	1.70334e-08	2.06256e-07	8.9912	FBgn0033352	CG8232	CG8232	CG8232	35893	4197 // cysteine-type endopeptidase activity // inferred from electronic annotation /// 4221 // ubiquitin thiolesterase activity // inferred from electronic annotation /// 4535 // poly(A)-specific ribonuclease activity // inferred from sequence or structural similarity /// 4518 // nuclease activity // inferred from electronic annotation /// 4527 // exonuclease activity // inferred from electronic…	6511 // ubiquitin-dependent protein catabolism // inferred from electronic annotation	5622 // intracellular // inferred from electronic annotation /// 5634 // nucleus // inferred from electronic annotation	IPR006055 // Exonuclease // 1.1E-28
4872	146071_at	0.504141	-0.0665251	7.4954	1.74148e-08	2.1051e-07	8.96888	FBgn0052982	CG32982	CG32982	CG32982	34237	---	---	---	IPR001849 // Pleckstrin-like // 9.6E-10 /// IPR001849 // Pleckstrin-like // 9.6E-10
8122	149321_at	0.552281	0.674449	7.49368	1.74969e-08	2.1132e-07	8.96414	FBgn0037312	CG11999	CG11999	CG11999	40637	5515 // protein binding // inferred from physical interaction	---	16020 // membrane // inferred from electronic annotation	IPR003608 // MIR domain // 5.0E-12 /// IPR003608 // MIR domain // 5.6E-15 /// IPR003608 // MIR domain // 1.7E-10
11138	152337_at	0.547732	2.03979	7.48723	1.7808e-08	2.14892e-07	8.94637	FBgn0029878	CG10695	Pat1	Pat1	31593	3777 // microtubule motor activity // inferred from sequence or structural similarity /// 5515 // protein binding // inferred from physical interaction /// 5488 // binding // inferred from electronic annotation /// 3777 // microtubule motor activity // inferred from sequence similarity	7018 // microtubule-based movement // inferred from sequence or structural similarity /// 7018 // microtubule-based movement // inferred from sequence similarity	5871 // kinesin complex // inferred from sequence or structural similarity /// 5871 // kinesin complex // inferred from sequence similarity	---
11231	152430_at	0.80027	2.96875	7.48339	1.79961e-08	2.16416e-07	8.93578	FBgn0010488	CG3845	l(2)01424	lethal (2) 01424	46020	3729 // mRNA binding // inferred from electronic annotation /// 3743 // translation initiation factor activity // inferred from sequence or structural similarity /// 3723 // RNA binding // inferred from electronic annotation /// 3743 // translation initiation factor activity // inferred from electronic annotation /// 3743 // translation initiation factor activity // inferred from sequence similar…	6413 // translational initiation // inferred from electronic annotation /// 6445 // regulation of translation // inferred from electronic annotation /// 6446 // regulation of translational initiation // inferred from electronic annotation /// 35071 // salivary gland cell autophagic cell death // inferred from expression pattern /// 48102 // autophagic cell death // inferred from expression pattern	5845 // mRNA cap complex // inferred from sequence or structural similarity /// 5845 // mRNA cap complex // inferred from sequence similarity	IPR003890 // Initiation factor eIF-4 gamma, middle // 3.3E-36 /// IPR003307 // eIF4-gamma/eIF5/eIF2-epsilon // 8.3E-26
11709	152908_at	0.692178	1.3809	7.48372	1.79798e-08	2.16416e-07	8.93669	FBgn0037275	CG14655	CG14655	CG14655	40594	3676 // nucleic acid binding // inferred from electronic annotation /// 8270 // zinc ion binding // inferred from electronic annotation /// 30528 // transcription regulator activity // inferred from electronic annotation /// 46872 // metal ion binding // inferred from electronic annotation	6139 // nucleobase, nucleoside, nucleotide and nucleic acid metabolism // inferred from electronic annotation /// 6357 // regulation of transcription from RNA polymerase II promoter // inferred from electronic annotation /// 6366 // transcription from RNA polymerase II promoter // inferred from electronic annotation /// 8283 // cell proliferation // inferred from electronic annotation	5634 // nucleus // inferred from electronic annotation	IPR007087 // Zn-finger, C2H2 type // 1.6E-5 /// IPR007087 // Zn-finger, C2H2 type // 4.4E-5 /// IPR007087 // Zn-finger, C2H2 type // 7.3E-6 /// IPR007087 // Zn-finger, C2H2 type // 9.3E-6
13541	154740_at	0.433203	1.46924	7.48368	1.79818e-08	2.16416e-07	8.93658	FBgn0051793	CG31793	CG31793	CG31793	326161	166 // nucleotide binding // inferred from electronic annotation /// 5215 // transporter activity // inferred from sequence or structural similarity /// 5524 // ATP binding // inferred from electronic annotation /// 42626 // ATPase activity, coupled to transmembrane movement of substances // inferred from sequence or structural similarity /// 16887 // ATPase activity // inferred from electronic a…	6810 // transport // inferred from sequence or structural similarity /// 6858 // extracellular transport // inferred from electronic annotation /// 6952 // defense response // inferred from electronic annotation /// 9636 // response to toxin // inferred from electronic annotation /// 6810 // transport // inferred from electronic annotation /// 6810 // transport // inferred from sequence similarity	16021 // integral to membrane // inferred from electronic annotation /// 43190 // ATP-binding cassette (ABC) transporter complex // inferred from sequence or structural similarity /// 16020 // membrane // inferred from electronic annotation /// 43190 // ATP-binding cassette (ABC) transporter complex // inferred from sequence similarity	IPR001140 // ABC transporter, transmembrane region // 6.1E-20 /// IPR001140 // ABC transporter, transmembrane region // 3.3E-21 /// IPR003439 // ABC transporter // 1.7E-49 /// IPR003439 // ABC transporter // 5.5E-45
3550	144749_at	0.609654	0.461851	7.47785	1.82708e-08	2.19155e-07	8.92051	FBgn0052703	CG32703	CG32703	CG32703	31877	4674 // protein serine/threonine kinase activity // non-traceable author statement /// 4707 // MAP kinase activity // inferred from sequence or structural similarity /// 5524 // ATP binding // inferred from electronic annotation /// 5515 // protein binding // inferred from physical interaction /// 166 // nucleotide binding // inferred from electronic annotation /// 4672 // protein kinase activity…	165 // MAPKKK cascade // inferred from electronic annotation /// 6468 // protein amino acid phosphorylation // non-traceable author statement /// 6916 // anti-apoptosis // inferred from electronic annotation /// 8283 // cell proliferation // inferred from electronic annotation /// 6468 // protein amino acid phosphorylation // inferred from electronic annotation	---	IPR000719 // Protein kinase // 3.5E-80
11557	152756_at	1.23226	4.08556	7.47789	1.82691e-08	2.19155e-07	8.9206	FBgn0000120 /// FBgn0068531	CG5711	Arr1 /// DyakArr1	Arrestin 1 /// Arr1	35078	16030 // metarhodopsin binding // inferred from sequence or structural similarity /// 16030 // metarhodopsin binding // traceable author statement /// 5515 // protein binding // inferred from physical interaction /// 16030 // metarhodopsin binding // inferred from sequence similarity	6886 // intracellular protein transport // inferred from electronic annotation /// 6897 // endocytosis // inferred from electronic annotation /// 7186 // G-protein coupled receptor protein signaling pathway // inferred from electronic annotation /// 7602 // phototransduction // non-traceable author statement /// 16059 // deactivation of rhodopsin mediated signaling // inferred from genetic intera…	5624 // membrane fraction // inferred from direct assay /// 16028 // rhabdomere // inferred from direct assay	IPR000698 // Arrestin // 9.1E-60 /// IPR000698 // Arrestin // 6.7E-31
5794	146993_at	0.473825	0.487147	7.47687	1.83198e-08	2.19368e-07	8.91781	FBgn0050029	CG30029	CG30029	CG30029	246402	---	---	---	---
1083	142282_at	0.459257	0.669238	7.47645	1.83409e-08	2.19433e-07	8.91665	FBgn0032797	CG10186	CG10186	CG10186	35238	5215 // transporter activity // inferred from electronic annotation /// 5507 // copper ion binding // inferred from electronic annotation	6118 // electron transport // inferred from electronic annotation /// 6810 // transport // inferred from electronic annotation /// 6952 // defense response // inferred from electronic annotation	16020 // membrane // inferred from sequence or structural similarity /// 16020 // membrane // inferred from sequence similarity	IPR000436 // Sushi domain/SCR domain/CCP module // 1.5E-5 /// IPR000436 // Sushi domain/SCR domain/CCP module // 1.9E-9 /// IPR000436 // Sushi domain/SCR domain/CCP module // 6.1E-11 /// IPR000436 // Sushi domain/SCR domain/CCP module // 2.0E-14 /// IPR000436 // Sushi domain/SCR domain/CCP module // 8.8E-8 /// IPR000436 // Sushi domain/SCR domain/CCP module // 2.9E-8 /// IPR000436 // Sushi domain…
305	141504_at	0.457785	1.73929	7.46732	1.88051e-08	2.24412e-07	8.89145	FBgn0001308	CG7765	Khc	Kinesin heavy chain	36810	3774 // motor activity // non-traceable author statement /// 3777 // microtubule motor activity // inferred from sequence or structural similarity /// 3777 // microtubule motor activity // non-traceable author statement /// 5200 // structural constituent of cytoskeleton // inferred from electronic annotation /// 5524 // ATP binding // inferred from electronic annotation /// 8017 // microtubule bi…	1754 // eye photoreceptor cell differentiation // inferred from genetic interaction /// 6605 // protein targeting // inferred from electronic annotation /// 7018 // microtubule-based movement // inferred from sequence or structural similarity /// 7018 // microtubule-based movement // non-traceable author statement /// 7269 // neurotransmitter secretion // non-traceable author statement /// 7303 /…	5871 // kinesin complex // inferred from direct assay /// 5871 // kinesin complex // inferred from sequence or structural similarity /// 5871 // kinesin complex // non-traceable author statement /// 5874 // microtubule // inferred from electronic annotation /// 5875 // microtubule associated complex // inferred from electronic annotation /// 5871 // kinesin complex // inferred from sequence simil…	IPR001752 // Kinesin, motor region // 1.0E-126
8531	149730_at	0.662218	1.38154	7.46462	1.89444e-08	2.25498e-07	8.88401	FBgn0037987	CG14739	CG14739	CG14739	41467	4840 // ubiquitin conjugating enzyme activity // inferred from sequence or structural similarity /// 16874 // ligase activity // inferred from electronic annotation /// 5515 // protein binding // inferred from physical interaction /// 4842 // ubiquitin-protein ligase activity // inferred from electronic annotation /// 4840 // ubiquitin conjugating enzyme activity // inferred from sequence similar…	6464 // protein modification // inferred from electronic annotation /// 6512 // ubiquitin cycle // inferred from electronic annotation /// 19538 // protein metabolism // inferred from electronic annotation	---	IPR000608 // Ubiquitin-conjugating enzymes // 1.0E-47
11877	153076_at	0.539088	1.92582	7.46195	1.90834e-08	2.2696e-07	8.87664	FBgn0030892	CG7206	CG7206	CG7206	32788	5515 // protein binding // inferred from physical interaction	---	---	---
2908	144107_at	0.433365	0.418999	7.46137	1.91138e-08	2.26974e-07	8.87504	FBgn0026015	CG3458	Top3	Topoisomerase 3	31565	3676 // nucleic acid binding // inferred from electronic annotation /// 3916 // DNA topoisomerase activity // inferred from direct assay /// 3916 // DNA topoisomerase activity // non-traceable author statement /// 3917 // DNA topoisomerase type I activity // inferred from sequence or structural similarity /// 3917 // DNA topoisomerase type I activity // non-traceable author statement /// 4520 // …	737 // DNA catabolism, endonucleolytic // inferred from direct assay /// 6265 // DNA topological change // inferred from electronic annotation /// 6268 // DNA unwinding during replication // inferred from electronic annotation /// 6304 // DNA modification // inferred from electronic annotation /// 6418 // tRNA aminoacylation for protein translation // inferred from electronic annotation	5694 // chromosome // inferred from electronic annotation	IPR000380 // DNA topoisomerase I // 2.1E-69 /// IPR006171 // TOPRIM // 1.4E-24
13661	154860_at	0.469857	3.05111	7.46131	1.91171e-08	2.26974e-07	8.87486	FBgn0020249	CG7954	stck	steamer duck	40999	5200 // structural constituent of cytoskeleton // inferred from electronic annotation /// 8270 // zinc ion binding // inferred from electronic annotation /// 46872 // metal ion binding // inferred from electronic annotation	6928 // cell motility // inferred from electronic annotation /// 7010 // cytoskeleton organization and biogenesis // inferred from electronic annotation /// 7475 // apposition of dorsal and ventral wing surfaces // inferred from mutant phenotype	---	IPR001781 // Zn-binding protein, LIM // 2.8E-20 /// IPR001781 // Zn-binding protein, LIM // 1.3E-11 /// IPR001781 // Zn-binding protein, LIM // 1.9E-9 /// IPR001781 // Zn-binding protein, LIM // 8.0E-22 /// IPR001781 // Zn-binding protein, LIM // 4.8E-19 /// IPR001781 // Zn-binding protein, LIM // 2.8E-20 /// IPR001781 // Zn-binding protein, LIM // 1.3E-11 /// IPR001781 // Zn-binding protein, LIM…
1034	142233_at	0.645573	1.59046	7.45849	1.92651e-08	2.28153e-07	8.86709	FBgn0024956	CG7614	Mat1	Mat1	36130	4842 // ubiquitin-protein ligase activity // inferred from electronic annotation /// 8270 // zinc ion binding // inferred from electronic annotation /// 16251 // general RNA polymerase II transcription factor activity // inferred from sequence or structural similarity /// 19209 // kinase activator activity // inferred from electronic annotation /// 5515 // protein binding // inferred from electro…	74 // regulation of progression through cell cycle // inferred from electronic annotation /// 6281 // DNA repair // inferred from electronic annotation /// 6367 // transcription initiation from RNA polymerase II promoter // inferred from sequence or structural similarity /// 6461 // protein complex assembly // inferred from electronic annotation /// 16567 // protein ubiquitination // inferred fro…	151 // ubiquitin ligase complex // inferred from electronic annotation /// 5675 // transcription factor TFIIH complex // inferred from sequence or structural similarity /// 5634 // nucleus // inferred from electronic annotation /// 5675 // transcription factor TFIIH complex // inferred from sequence similarity	IPR004575 // Cdk-activating kinase assembly factor (MAT1) // 1.0E-126
6791	147990_at	0.449032	0.438753	7.45782	1.93007e-08	2.2838e-07	8.86523	FBgn0035243	CG13926	CG13926	CG13926	38192	---	---	---	IPR008493 // Protein of unknown function DUF775 // 1.0E-126
3702	144901_at	0.485538	0.804094	7.45728	1.93292e-08	2.28525e-07	8.86374	FBgn0030343	CG1886	ATP7	ATP7	32142	4008 // copper-exporting ATPase activity // inferred from sequence or structural similarity /// 5507 // copper ion binding // inferred from electronic annotation /// 5524 // ATP binding // inferred from electronic annotation /// 46872 // metal ion binding // inferred from electronic annotation /// 166 // nucleotide binding // inferred from electronic annotation /// 3824 // catalytic activity // i…	6812 // cation transport // inferred from electronic annotation /// 6825 // copper ion transport // inferred from mutant phenotype /// 8152 // metabolism // inferred from electronic annotation /// 6825 // copper ion transport // inferred from electronic annotation /// 30001 // metal ion transport // inferred from electronic annotation	16020 // membrane // inferred from electronic annotation /// 16021 // integral to membrane // inferred from electronic annotation	IPR006121 // Heavy metal transport/detoxification protein // 3.1E-7 /// IPR006121 // Heavy metal transport/detoxification protein // 4.6E-14 /// IPR006121 // Heavy metal transport/detoxification protein // 2.4E-6 /// IPR006121 // Heavy metal transport/detoxification protein // 1.8E-15 /// IPR008250 // E1-E2 ATPase-associated region // 1.8E-87 /// IPR005834 // Haloacid dehalogenase-like hydrolase …
2527	143726_at	0.384894	0.154227	7.45057	1.96877e-08	2.32567e-07	8.84522	FBgn0013812	CG3723	Dhc93AB	Dynein heavy chain at 93AB	42485	166 // nucleotide binding // inferred from electronic annotation /// 3774 // motor activity // inferred from sequence or structural similarity /// 3777 // microtubule motor activity // inferred from electronic annotation /// 4197 // cysteine-type endopeptidase activity // inferred from electronic annotation /// 5200 // structural constituent of cytoskeleton // inferred from electronic annotation …	6508 // proteolysis // inferred from electronic annotation /// 6928 // cell motility // inferred from electronic annotation /// 7018 // microtubule-based movement // inferred from sequence or structural similarity /// 7018 // microtubule-based movement // inferred from sequence similarity	5858 // axonemal dynein complex // inferred from sequence or structural similarity /// 5875 // microtubule associated complex // inferred from sequence or structural similarity /// 5858 // axonemal dynein complex // inferred from sequence similarity /// 5875 // microtubule associated complex // inferred from sequence similarity	IPR004273 // Dynein heavy chain // 1.0E-126
10337	151536_at	0.689805	1.48003	7.44897	1.97742e-08	2.33392e-07	8.84079	FBgn0033441	CG1776	CG1776	CG1776	36002	4674 // protein serine/threonine kinase activity // non-traceable author statement /// 4687 // myosin light chain kinase activity // inferred from sequence or structural similarity /// 4702 // receptor signaling protein serine/threonine kinase activity // inferred from electronic annotation /// 4713 // protein-tyrosine kinase activity // inferred from electronic annotation /// 5200 // structural …	6468 // protein amino acid phosphorylation // non-traceable author statement /// 6917 // induction of apoptosis // inferred from electronic annotation /// 6936 // muscle contraction // inferred from electronic annotation /// 7015 // actin filament organization // inferred from mutant phenotype /// 7165 // signal transduction // inferred from electronic annotation /// 8360 // regulation of cell sh…	---	IPR000719 // Protein kinase // 1.7E-81
5173	146372_at	0.438297	3.32736	7.43541	2.05224e-08	2.41612e-07	8.80336	FBgn0032596	CG17331	CG17331	CG17331	34999	4175 // endopeptidase activity // inferred from sequence or structural similarity /// 5515 // protein binding // inferred from physical interaction /// 4175 // endopeptidase activity // inferred from electronic annotation /// 4298 // threonine endopeptidase activity // inferred from electronic annotation /// 8233 // peptidase activity // inferred from electronic annotation /// 16787 // hydrolase …	6508 // proteolysis // inferred from electronic annotation /// 6511 // ubiquitin-dependent protein catabolism // inferred from electronic annotation /// 50875 // cellular physiological process // inferred from mutant phenotype	5839 // proteasome core complex (sensu Eukaryota) // inferred from sequence or structural similarity /// 5829 // cytosol // inferred from electronic annotation /// 5839 // proteasome core complex (sensu Eukaryota) // inferred from electronic annotation /// 43234 // protein complex // inferred from electronic annotation /// 5839 // proteasome core complex (sensu Eukaryota) // inferred from sequenc…	IPR001353 // Peptidase T1, 20S proteasome // 2.0E-48
5511	146710_at	0.546766	1.92361	7.43399	2.06025e-08	2.42288e-07	8.79943	FBgn0033127	CG12845	Tsp42Ef	Tetraspanin 42Ef	35615	---	---	16021 // integral to membrane // inferred from sequence or structural similarity /// 16021 // integral to membrane // inferred from electronic annotation /// 16021 // integral to membrane // inferred from sequence similarity	IPR000301 // CD9/CD37/CD63 antigen // 1.7E-28
13337	154536_at	0.706041	1.82219	7.43378	2.06144e-08	2.42288e-07	8.79885	FBgn0031450	CG2903	Hrs	Hepatocyte growth factor regulated tyrosine kinase substrate	33458	5515 // protein binding // non-traceable author statement /// 8270 // zinc ion binding // inferred from electronic annotation /// 5515 // protein binding // inferred from physical interaction /// 46872 // metal ion binding // inferred from electronic annotation	6886 // intracellular protein transport // inferred from electronic annotation /// 6887 // exocytosis // traceable author statement /// 6897 // endocytosis // non-traceable author statement /// 7269 // neurotransmitter secretion // non-traceable author statement /// 8293 // torso signaling pathway // non-traceable author statement /// 8333 // endosome to lysosome transport // traceable author sta…	5737 // cytoplasm // non-traceable author statement /// 5768 // endosome // traceable author statement /// 5769 // early endosome // non-traceable author statement /// 5770 // late endosome // non-traceable author statement /// 8021 // synaptic vesicle // non-traceable author statement	IPR002014 // VHS // 8.3E-43 /// IPR003903 // Ubiquitin interacting motif // 4.4E-4 /// IPR000306 // Zn-finger, FYVE type // 4.2E-28 /// IPR003903 // Ubiquitin interacting motif // 4.4E-4 /// IPR000306 // Zn-finger, FYVE type // 4.2E-28
6341	147540_at	0.558176	1.74791	7.43251	2.06863e-08	2.4293e-07	8.79534	FBgn0034505	CG16739	CG16739	CG16739	37307	---	---	---	---
3018	144217_at	0.63967	0.793697	7.42844	2.09186e-08	2.45042e-07	8.78408	FBgn0028485	CG4272	CG4272	CG4272	33419	5515 // protein binding // inferred from physical interaction	---	---	---
7170	148369_at	0.969492	0.0799199	7.42767	2.09624e-08	2.4535e-07	8.78198	FBgn0035830	CG8209	CG8209	CG8209	38888	---	---	---	IPR000449 // Ubiquitin-associated domain // 5.9E-11 /// IPR001012 // UBX domain // 9.5E-22
349	141548_at	0.864308	1.22705	7.42345	2.12063e-08	2.47997e-07	8.77032	FBgn0029095	CG4276	aru	arouser	33268	3735 // structural constituent of ribosome // inferred from electronic annotation	6412 // protein biosynthesis // inferred from electronic annotation /// 7173 // epidermal growth factor receptor signaling pathway // inferred from sequence or structural similarity /// 7173 // epidermal growth factor receptor signaling pathway // non-traceable author statement /// 7173 // epidermal growth factor receptor signaling pathway // inferred from sequence similarity	5622 // intracellular // inferred from electronic annotation /// 5840 // ribosome // inferred from electronic annotation	IPR001452 // SH3 // 1.1E-6 /// IPR001452 // SH3 // 1.1E-6
1575	142774_at	0.346092	-0.0100223	7.41067	2.19628e-08	2.5663e-07	8.73499	FBgn0053231	CG33231	CG33231	CG33231	2769003	---	---	---	---
5590	146789_i_at	0.563084	0.590664	7.41011	2.19966e-08	2.56811e-07	8.73344	FBgn0050372	CG30372	CG30372	CG30372	35783	8060 // ARF GTPase activator activity // inferred from sequence or structural similarity /// 8060 // ARF GTPase activator activity // inferred from sequence similarity	7264 // small GTPase mediated signal transduction // inferred from sequence or structural similarity /// 43087 // regulation of GTPase activity // inferred from electronic annotation /// 7264 // small GTPase mediated signal transduction // inferred from sequence similarity	---	IPR001164 // Human Rev interacting-like protein (hRIP) // 7.1E-34 /// IPR002110 // Ankyrin // 0.0098 /// IPR002110 // Ankyrin // 2.5E-5 /// IPR001452 // SH3 // 1.7E-12 /// IPR001849 // Pleckstrin-like // 1.8E-19
11213	152412_at	0.765104	3.13125	7.4076	2.21491e-08	2.57946e-07	8.72648	FBgn0035346	CG1146	CG1146	CG1146	38313	---	---	---	---
4426	145625_f_at	0.701776	1.93457	7.39781	2.27518e-08	2.64087e-07	8.69941	FBgn0031399	CG7074	mio	missing oocyte	33399	51082 // unfolded protein binding // inferred from sequence or structural similarity /// 51082 // unfolded protein binding // inferred from sequence similarity	6457 // protein folding // inferred from sequence or structural similarity /// 16350 // maintenance of oocyte identity (sensu Insecta) // inferred from mutant phenotype /// 30716 // oocyte fate determination // inferred from mutant phenotype /// 40020 // regulation of meiosis // inferred from mutant phenotype /// 6457 // protein folding // inferred from sequence similarity	---	---
545	141744_at	0.370052	-0.430843	7.38702	2.34359e-08	2.71128e-07	8.66956	FBgn0028675	CG5772	Sur	Sulfonylurea receptor	34350	166 // nucleotide binding // inferred from electronic annotation /// 5215 // transporter activity // inferred from electronic annotation /// 5524 // ATP binding // inferred from electronic annotation /// 8281 // sulfonylurea receptor activity // inferred from sequence or structural similarity /// 16887 // ATPase activity // inferred from electronic annotation /// 17111 // nucleoside-triphosphatas…	6858 // extracellular transport // inferred from electronic annotation /// 6952 // defense response // inferred from electronic annotation /// 7507 // heart development // non-traceable author statement /// 9636 // response to toxin // inferred from electronic annotation /// 6810 // transport // inferred from electronic annotation	8282 // ATP-sensitive potassium channel complex // inferred from sequence or structural similarity /// 16020 // membrane // inferred from electronic annotation /// 16021 // integral to membrane // inferred from electronic annotation /// 8282 // ATP-sensitive potassium channel complex // inferred from sequence similarity	IPR001140 // ABC transporter, transmembrane region // 3.8E-18 /// IPR001140 // ABC transporter, transmembrane region // 2.1E-17 /// IPR003439 // ABC transporter // 5.9E-36 /// IPR003439 // ABC transporter // 2.7E-39
1608	142807_at	0.994572	4.8665	7.38667	2.34585e-08	2.71167e-07	8.66859	FBgn0040994	CG17567	CG17567	CG17567	50468	---	---	---	---
13230	154429_at	0.380194	0.087018	7.38291	2.37017e-08	2.73752e-07	8.65819	FBgn0022702	CG2054	Cht2	Chitinase 2	38223	4568 // chitinase activity // inferred from sequence or structural similarity /// 4568 // chitinase activity // non-traceable author statement /// 16799 // hydrolase activity, hydrolyzing N-glycosyl compounds // inferred from electronic annotation /// 5515 // protein binding // inferred from physical interaction /// 4553 // hydrolase activity, hydrolyzing O-glycosyl compounds // inferred from ele…	6036 // cuticle chitin catabolism // inferred from sequence or structural similarity /// 272 // polysaccharide catabolism // inferred from electronic annotation /// 5975 // carbohydrate metabolism // inferred from electronic annotation /// 6032 // chitin catabolism // inferred from electronic annotation /// 6032 // chitin catabolism // non-traceable author statement /// 6036 // cuticle chitin cat…	---	IPR001223 // Glycoside hydrolase, family 18 // 9.5E-126
9440	150639_at	0.495467	1.26776	7.37657	2.41182e-08	2.78333e-07	8.64064	FBgn0039401	CG6095	CG6095	CG6095	43163	---	---	145 // exocyst // inferred from sequence or structural similarity /// 145 // exocyst // inferred from sequence similarity	---
13919	155118_at	0.610121	2.71808	7.37297	2.43581e-08	2.80639e-07	8.63066	FBgn0002044	CG10084	swm	second mitotic wave missing	48814	5515 // protein binding // inferred from physical interaction /// 166 // nucleotide binding // inferred from electronic annotation /// 3676 // nucleic acid binding // inferred from electronic annotation /// 8270 // zinc ion binding // inferred from electronic annotation	---	---	IPR000504 // RNA-binding region RNP-1 (RNA recognition motif) // 8.8E-5 /// IPR000571 // Zn-finger, C-x8-C-x5-C-x3-H type // 1.9E-4
9267	150466_at	0.710004	1.28982	7.3651	2.48907e-08	2.8607e-07	8.60886	FBgn0039111	CG10371	Plip	PTEN-like phosphatase	42807	8138 // protein tyrosine/serine/threonine phosphatase activity // non-traceable author statement /// 4721 // phosphoprotein phosphatase activity // inferred from electronic annotation /// 8138 // protein tyrosine/serine/threonine phosphatase activity // inferred from electronic annotation /// 16787 // hydrolase activity // inferred from electronic annotation	6470 // protein amino acid dephosphorylation // non-traceable author statement /// 6470 // protein amino acid dephosphorylation // inferred from electronic annotation	5739 // mitochondrion // inferred from electronic annotation /// 16020 // membrane // inferred from electronic annotation	IPR000340 // Dual specificity protein phosphatase // 1.9E-15 /// IPR000340 // Dual specificity protein phosphatase // 1.9E-15
9971	151170_at	0.533635	0.9077	7.35135	2.58494e-08	2.96358e-07	8.57078	FBgn0052306	CG32306	CG32306	CG32306	38306	---	---	---	---
474	141673_at	0.575503	1.35842	7.34432	2.63541e-08	3.01854e-07	8.55129	FBgn0034049	CG8291	CG8291	CG8291	36747	5326 // neurotransmitter transporter activity // inferred from sequence or structural similarity /// 5328 // neurotransmitter:sodium symporter activity // inferred from electronic annotation /// 15293 // symporter activity // inferred from electronic annotation /// 5326 // neurotransmitter transporter activity // inferred from sequence similarity	6811 // ion transport // inferred from electronic annotation /// 6836 // neurotransmitter transport // inferred from electronic annotation /// 6858 // extracellular transport // inferred from electronic annotation /// 6810 // transport // inferred from electronic annotation	5887 // integral to plasma membrane // inferred from electronic annotation /// 16020 // membrane // inferred from electronic annotation /// 16021 // integral to membrane // inferred from electronic annotation	---
4071	145270_at	0.439387	-0.302284	7.33495	2.70427e-08	3.08274e-07	8.5253	FBgn0030884	CG6847	CG6847	CG6847	32778	4806 // triacylglycerol lipase activity // inferred from sequence or structural similarity /// 3824 // catalytic activity // inferred from electronic annotation /// 4806 // triacylglycerol lipase activity // inferred from sequence similarity	6629 // lipid metabolism // inferred from electronic annotation	---	IPR000734 // Lipase // 2.9E-70
58	141257_at	0.915669	2.62587	7.33416	2.71017e-08	3.08695e-07	8.5231	FBgn0001142	CG2718	Gs1	Glutamine synthetase 1	33172	4356 // glutamate-ammonia ligase activity // inferred from direct assay /// 4356 // glutamate-ammonia ligase activity // inferred from sequence or structural similarity /// 4356 // glutamate-ammonia ligase activity // non-traceable author statement /// 15930 // glutamate synthase activity // non-traceable author statement /// 4356 // glutamate-ammonia ligase activity // inferred from electronic a…	6541 // glutamine metabolism // non-traceable author statement /// 8652 // amino acid biosynthesis // inferred from electronic annotation /// 9399 // nitrogen fixation // inferred from electronic annotation /// 6542 // glutamine biosynthesis // inferred from electronic annotation /// 6807 // nitrogen compound metabolism // inferred from electronic annotation	5739 // mitochondrion // inferred from direct assay /// 5739 // mitochondrion // non-traceable author statement /// 5739 // mitochondrion // inferred from electronic annotation	IPR008147 // Glutamine synthetase, beta-Grasp domain // 4.4E-32 /// IPR008146 // Glutamine synthetase, catalytic domain // 4.9E-109
3595	144794_at	0.462988	0.00893267	7.32607	2.77113e-08	3.15382e-07	8.50069	FBgn0030193	CG12641	CG12641	CG12641	31963	---	---	---	---
8484	149683_at	0.691466	1.38397	7.32109	2.80939e-08	3.19477e-07	8.48687	FBgn0037893	CG6719	CG6719	CG6719	41365	51087 // chaperone binding // inferred from sequence or structural similarity /// 5515 // protein binding // inferred from electronic annotation /// 51087 // chaperone binding // inferred from sequence similarity	6458 // 'de novo' protein folding // inferred from sequence or structural similarity /// 6461 // protein complex assembly // inferred from electronic annotation /// 6457 // protein folding // inferred from electronic annotation /// 6458 // 'de novo' protein folding // inferred from sequence similarity	16272 // prefoldin complex // inferred from sequence or structural similarity /// 16272 // prefoldin complex // inferred from electronic annotation /// 16272 // prefoldin complex // inferred from sequence similarity	IPR004127 // Putative prefoldin chaperone // 5.9E-42
980	142179_s_at	0.654437	0.425871	7.32041	2.81469e-08	3.19561e-07	8.48498	FBgn0028495	CG18616	CG18616	CG18616	41552	5488 // binding // inferred from electronic annotation	---	---	---
7703	148902_at	0.60905	0.115956	7.32045	2.81441e-08	3.19561e-07	8.48508	FBgn0036643	CG4109	Syx8	Syntaxin 8	39847	5486 // t-SNARE activity // inferred from sequence or structural similarity /// 5486 // t-SNARE activity // inferred from sequence similarity	6886 // intracellular protein transport // inferred from electronic annotation /// 7269 // neurotransmitter secretion // inferred from sequence or structural similarity /// 16081 // synaptic vesicle docking during exocytosis // inferred from sequence or structural similarity /// 16192 // vesicle-mediated transport // inferred from sequence or structural similarity /// 7269 // neurotransmitter sec…	5886 // plasma membrane // inferred from sequence or structural similarity /// 5886 // plasma membrane // inferred from sequence similarity	IPR000727 // Target SNARE coiled-coil domain // 1.4E-13 /// IPR000727 // Target SNARE coiled-coil domain // 1.4E-13
5502	146701_at	0.543509	1.16463	7.32	2.8179e-08	3.19667e-07	8.48383	FBgn0033113	CG9455	CG9455	CG9455	35600	4867 // serine-type endopeptidase inhibitor activity // inferred from sequence or structural similarity /// 4867 // serine-type endopeptidase inhibitor activity // inferred from electronic annotation /// 4867 // serine-type endopeptidase inhibitor activity // inferred from sequence similarity	6508 // proteolysis // inferred from electronic annotation	---	IPR000215 // Serpin // 3.5E-100
7162	148361_at	0.519343	0.2203	7.31844	2.83002e-08	3.20782e-07	8.4795	FBgn0052369	CG32369	CG32369	CG32369	38873	4176 // ATP-dependent peptidase activity // inferred from electronic annotation /// 4553 // hydrolase activity, hydrolyzing O-glycosyl compounds // inferred from electronic annotation /// 4842 // ubiquitin-protein ligase activity // inferred from electronic annotation /// 8270 // zinc ion binding // inferred from electronic annotation /// 5488 // binding // inferred from electronic annotation ///…	5975 // carbohydrate metabolism // inferred from electronic annotation /// 6510 // ATP-dependent proteolysis // inferred from electronic annotation /// 16567 // protein ubiquitination // inferred from electronic annotation	151 // ubiquitin ligase complex // inferred from electronic annotation	IPR003111 // Peptidase S16, lon N-terminal // 1.0E-8 /// IPR001841 // Zn-finger, RING // 2.6E-9
13607	154806_at	0.411045	0.129167	7.31492	2.85758e-08	3.23382e-07	8.46974	FBgn0010750	CG2503	atms	antimeros	40593	19894 // kinesin binding // inferred from direct assay	---	---	IPR007133 // RNA polymerase II associated, Paf1 // 1.0E-126
13062	154261_at	0.669304	0.89256	7.2887	3.07166e-08	3.45932e-07	8.39695	FBgn0030973	CG7332	CG7332	CG7332	32885	5509 // calcium ion binding // inferred from electronic annotation	---	---	---
[truncated: 1,895 more rows]
