# Supplementary material for: Gene expression changes in response to aging compared to heat stress, oxidative stress and ionizing radiation in Drosophila melanogaster
Source: Aging (Albany NY). 2012 Nov 30;4(11):768–89. doi: 10.18632/aging.100499 (PMC3560439; doi:10.18632/aging.100499)
Supplement: Supplementary file 16 [file aging-04-768-s016.xlsx]

## Sheet: TableS4l.IRdown
Table S4l. IR down
ID	M	A	t	P.Value	adj.P.Val	B	FlyBase	Ensembl	Gene.Symbol	Gene.Title	Entrez.Gene	Gene.Ontology.Molecular.Function	Gene.Ontology.Biological.Process	Gene.Ontology.Cellular.Component	InterPro
2772	143971_at	-4.80755	3.42583	-36.0241	3.85e-27	9.31e-24	51.5494	FBgn0023077	CG2457	inaF	inaF	32126	5246 // calcium channel regulator activity // inferred from genetic interaction /// 5246 // calcium channel regulator activity // inferred from mutant phenotype	9416 // response to light stimulus // inferred from mutant phenotype /// 16056 // rhodopsin mediated signaling // inferred from mutant phenotype /// 16058 // maintenance of rhodopsin mediated signaling // inferred from mutant phenotype	---	---
4251	145450_at	-2.33888	0.34687	-35.8929	4.31e-27	9.31e-24	51.445	FBgn0031141	CG1304	CG1304	CG1304	33074	4252 // serine-type endopeptidase activity // inferred from sequence or structural similarity /// 4252 // serine-type endopeptidase activity // non-traceable author statement /// 4263 // chymotrypsin activity // inferred from electronic annotation /// 4295 // trypsin activity // inferred from electronic annotation /// 4252 // serine-type endopeptidase activity // inferred from electronic annotati…	6508 // proteolysis // non-traceable author statement /// 6508 // proteolysis // inferred from electronic annotation	---	IPR001254 // Peptidase S1, chymotrypsin // 1.3E-63
2500	143699_at	-2.28046	0.717104	-32.2156	1.18e-25	1.51e-22	48.3296	FBgn0011834	CG2071	Ser6	Serine protease 6	33073	4252 // serine-type endopeptidase activity // inferred from sequence or structural similarity /// 4252 // serine-type endopeptidase activity // non-traceable author statement /// 4263 // chymotrypsin activity // inferred from electronic annotation /// 4295 // trypsin activity // inferred from electronic annotation /// 8236 // serine-type peptidase activity // non-traceable author statement /// 42…	6508 // proteolysis // non-traceable author statement /// 6508 // proteolysis // inferred from electronic annotation	---	IPR001254 // Peptidase S1, chymotrypsin // 9.9E-67
12057	153256_at	-3.56244	3.41458	-26.9321	2.73e-23	2.12e-20	43.1023	FBgn0029870	CG3869	Marf	Mitochondrial assembly regulatory factor	31581	3924 // GTPase activity // inferred from sequence or structural similarity /// 5525 // GTP binding // non-traceable author statement /// 19204 // nucleotide phosphatase activity // inferred from electronic annotation /// 166 // nucleotide binding // inferred from electronic annotation /// 3924 // GTPase activity // inferred from electronic annotation /// 5525 // GTP binding // inferred from elect…	6626 // protein targeting to mitochondrion // inferred from electronic annotation /// 7005 // mitochondrion organization and biogenesis // non-traceable author statement /// 8053 // mitochondrial fusion // inferred from sequence or structural similarity /// 8053 // mitochondrial fusion // inferred from electronic annotation /// 8053 // mitochondrial fusion // inferred from sequence similarity	5740 // mitochondrial envelope // inferred from sequence or structural similarity /// 5886 // plasma membrane // non-traceable author statement /// 5739 // mitochondrion // inferred from electronic annotation /// 5741 // mitochondrial outer membrane // inferred from electronic annotation /// 16020 // membrane // inferred from electronic annotation /// 16021 // integral to membrane // inferred fro…	IPR006884 // Fzo-like conserved region // 1.1E-118 /// IPR006884 // Fzo-like conserved region // 1.1E-118
12234	153433_at	-2.28396	3.09084	-24.7401	3.51e-22	2.14e-19	40.612	FBgn0011693	CG4899	Pdh	Photoreceptor dehydrogenase	39812	4022 // alcohol dehydrogenase activity // inferred from electronic annotation /// 16616 // oxidoreductase activity, acting on the CH-OH group of donors, NAD or NADP as acceptor // inferred from sequence or structural similarity /// 5515 // protein binding // inferred from physical interaction /// 3824 // catalytic activity // inferred from electronic annotation /// 16491 // oxidoreductase activit…	6629 // lipid metabolism // inferred from electronic annotation /// 8152 // metabolism // inferred from electronic annotation	---	IPR002198 // Short-chain dehydrogenase/reductase SDR // 6.5E-49 /// IPR002198 // Short-chain dehydrogenase/reductase SDR // 6.5E-47
11066	152265_at	-2.72312	2.63127	-24.0866	7.81e-22	4.56e-19	39.8266	FBgn0039313	CG11892	CG11892	CG11892	43053	5515 // protein binding // inferred from physical interaction /// 16301 // kinase activity // inferred from electronic annotation /// 16740 // transferase activity // inferred from electronic annotation	---	---	IPR004119 // Protein of unknown function DUF227 // 5.1E-119
8416	149615_at	-1.95978	1.58516	-23.8715	1.02e-21	5.72e-19	39.5636	FBgn0037788	CG3940	CG3940	CG3940	41238	4089 // carbonate dehydratase activity // inferred from sequence or structural similarity /// 8270 // zinc ion binding // inferred from electronic annotation /// 4089 // carbonate dehydratase activity // inferred from electronic annotation /// 4089 // carbonate dehydratase activity // inferred from sequence similarity	6730 // one-carbon compound metabolism // inferred from electronic annotation	---	IPR001148 // Carbonic anhydrase, eukaryotic // 7.7E-20 /// IPR001148 // Carbonic anhydrase, eukaryotic // 2.0E-14
4167	145366_at	-1.26012	0.142616	-22.6527	4.86e-21	2.2e-18	38.0274	FBgn0031016	CG12199	kek5	kekkon5	32930	4601 // peroxidase activity // inferred from electronic annotation /// 16491 // oxidoreductase activity // inferred from electronic annotation	6800 // oxygen and reactive oxygen species metabolism // inferred from electronic annotation /// 6952 // defense response // inferred from electronic annotation /// 7155 // cell adhesion // inferred from electronic annotation /// 19226 // transmission of nerve impulse // inferred from electronic annotation	---	IPR000483 // Cysteine-rich flanking region, C-terminal // 0.0011 /// IPR001611 // Leucine-rich repeat // 0.38 /// IPR001611 // Leucine-rich repeat // 0.0033 /// IPR001611 // Leucine-rich repeat // 0.04 /// IPR001611 // Leucine-rich repeat // 0.25 /// IPR007110 // Immunoglobulin-like // 2.6E-6
13027	154226_at	-1.58202	4.15574	-22.1156	9.9e-21	3.96e-18	37.325	FBgn0011760	CG6998	ctp	cut up	31405	3777 // microtubule motor activity // non-traceable author statement /// 5200 // structural constituent of cytoskeleton // inferred from electronic annotation /// 42623 // ATPase activity, coupled // inferred from sequence or structural similarity /// 5515 // protein binding // inferred from physical interaction /// 3774 // motor activity // inferred from electronic annotation /// 3777 // microtu…	6403 // RNA localization // inferred from electronic annotation /// 6886 // intracellular protein transport // inferred from electronic annotation /// 7018 // microtubule-based movement // inferred from sequence or structural similarity /// 7049 // cell cycle // inferred from electronic annotation /// 7283 // spermatogenesis // inferred from mutant phenotype /// 7476 // wing morphogenesis // infe…	5856 // cytoskeleton // non-traceable author statement /// 5868 // cytoplasmic dynein complex // inferred from sequence or structural similarity /// 5868 // cytoplasmic dynein complex // non-traceable author statement /// 30286 // dynein complex // inferred from sequence or structural similarity /// 5874 // microtubule // inferred from electronic annotation /// 5875 // microtubule associated comp…	IPR001372 // Dynein light chain, type 1 // 1.6E-67
5359	146558_at	-1.65021	1.14103	-21.8993	1.32e-20	5.15e-18	37.0374	FBgn0032896	CG14400	CG14400	CG14400	35354	---	---	---	---
11567	152766_at	-1.99677	1.32725	-21.7749	1.57e-20	5.78e-18	36.8709	FBgn0002563	CG4178	Lsp1	Larval serum protein 1	33274	5344 // oxygen transporter activity // inferred from electronic annotation /// 45735 // nutrient reservoir activity // non-traceable author statement /// 45735 // nutrient reservoir activity // inferred from electronic annotation	6810 // transport // inferred from electronic annotation	5576 // extracellular region // non-traceable author statement /// 5616 // larval serum protein complex // inferred from direct assay	IPR000896 // Arthropod hemocyanin/insect LSP // 8.2E-98 /// IPR005204 // Hemocyanin, N-terminal // 8.4E-38 /// IPR005203 // Hemocyanin, C-terminal // 1.8E-109
10997	152196_at	-1.49286	1.82689	-20.439	1.01e-19	3.08e-17	35.023	FBgn0027562	CG10345	CG10345	CG10345	42017	5044 // scavenger receptor activity // non-traceable author statement	6915 // apoptosis // inferred from electronic annotation /// 6952 // defense response // non-traceable author statement /// 7155 // cell adhesion // inferred from electronic annotation	5887 // integral to plasma membrane // non-traceable author statement /// 16020 // membrane // inferred from electronic annotation	IPR002159 // CD36 antigen // 1.8E-30 /// IPR002159 // CD36 antigen // 2.3E-21
266	141465_at	-1.73322	1.79992	-19.3897	4.71e-19	1.29e-16	33.4915	FBgn0032785	CG10026	CG10026	CG10026	35226	5386 // carrier activity // inferred from electronic annotation /// 8431 // vitamin E binding // inferred from sequence or structural similarity /// 16918 // retinal binding // inferred from sequence or structural similarity /// 5215 // transporter activity // inferred from electronic annotation /// 8431 // vitamin E binding // inferred from sequence similarity /// 16918 // retinal binding // inf…	6732 // coenzyme metabolism // inferred from electronic annotation /// 6810 // transport // inferred from electronic annotation /// 51189 // prosthetic group metabolism // inferred from electronic annotation	5622 // intracellular // inferred from electronic annotation	IPR001251 // Cellular retinaldehyde-binding)/triple function, C-terminal // 5.9E-26 /// IPR001251 // Cellular retinaldehyde-binding)/triple function, C-terminal // 5.9E-26
2461	143660_at	-2.14306	1.51962	-19.1668	6.59e-19	1.68e-16	33.1565	FBgn0011555	CG12385	Try	Trypsin	36218	4263 // chymotrypsin activity // inferred from electronic annotation /// 4295 // trypsin activity // inferred from sequence or structural similarity /// 4295 // trypsin activity // non-traceable author statement /// 4252 // serine-type endopeptidase activity // inferred from electronic annotation /// 4295 // trypsin activity // inferred from electronic annotation /// 8233 // peptidase activity //…	6508 // proteolysis // non-traceable author statement /// 6508 // proteolysis // inferred from electronic annotation	5576 // extracellular region // non-traceable author statement	IPR001254 // Peptidase S1, chymotrypsin // 5.3E-85
2847	144046_at	-1.69123	1.34319	-19.0158	8.29e-19	1.94e-16	32.9275	FBgn0024995	CG2680	CG2680	CG2680	31257	3869 // 4-nitrophenylphosphatase activity // inferred from sequence or structural similarity /// 3824 // catalytic activity // inferred from electronic annotation /// 16787 // hydrolase activity // inferred from electronic annotation /// 3869 // 4-nitrophenylphosphatase activity // inferred from sequence similarity	8152 // metabolism // inferred from electronic annotation	---	IPR005834 // Haloacid dehalogenase-like hydrolase // 1.3E-13
9510	150709_at	-1.7081	1.95327	-19.0139	8.32e-19	1.94e-16	32.9247	FBgn0039483	CG14259	CG14259	CG14259	43261	---	---	---	IPR004272 // Odorant binding protein // 1.2E-56
8104	149303_at	-1.83355	2.65474	-18.589	1.6e-18	3.45e-16	32.2715	FBgn0037288	CG14661	CG14661	CG14661	40611	---	---	---	IPR004272 // Odorant binding protein // 1.1E-48
5250	146449_at	-1.3817	1.42504	-18.4789	1.9e-18	3.97e-16	32.1	FBgn0032706	CG10369	Irk3	Inwardly rectifying potassium channel 3	35131	5242 // inward rectifier potassium channel activity // inferred from sequence or structural similarity /// 5242 // inward rectifier potassium channel activity // non-traceable author statement /// 5216 // ion channel activity // inferred from electronic annotation /// 5242 // inward rectifier potassium channel activity // inferred from electronic annotation /// 5242 // inward rectifier potassium …	6812 // cation transport // inferred from electronic annotation /// 6813 // potassium ion transport // inferred from electronic annotation	16020 // membrane // inferred from electronic annotation	IPR001838 // K+ channel, inward rectifier // 4.1E-83
8411	149610_at	-1.95176	1.20336	-18.2598	2.68e-18	5.52e-16	31.7562	FBgn0037782	CG12813	CG12813	CG12813	41232	---	---	---	IPR003172 // E1 protein and Def2/Der2 allergen // 4.6E-40
13144	154343_at	-1.31566	2.45465	-18.1703	3.09e-18	6.01e-16	31.6148	FBgn0030594	CG9509	CG9509	CG9509	32420	8812 // choline dehydrogenase activity // inferred from sequence or structural similarity /// 50660 // FAD binding // inferred from electronic annotation /// 16491 // oxidoreductase activity // inferred from electronic annotation /// 16614 // oxidoreductase activity, acting on CH-OH group of donors // inferred from electronic annotation /// 8812 // choline dehydrogenase activity // inferred from …	6118 // electron transport // inferred from electronic annotation /// 7498 // mesoderm development // inferred from expression pattern	---	IPR000172 // Glucose-methanol-choline oxidoreductase // 2.5E-86 /// IPR007867 // GMC oxidoreductase // 2.5E-35
9377	150576_at	-1.44155	2.6363	-18.0922	3.5e-18	6.71e-16	31.4907	FBgn0039312	CG10514	CG10514	CG10514	43052	5515 // protein binding // inferred from physical interaction /// 16301 // kinase activity // inferred from electronic annotation /// 16740 // transferase activity // inferred from electronic annotation	---	---	IPR004119 // Protein of unknown function DUF227 // 2.2E-121
10531	151730_at	-1.10089	0.419083	-18.0775	3.58e-18	6.77e-16	31.4674	FBgn0040069	CG32754	vanin-like	vanin-like	31551	16787 // hydrolase activity // non-traceable author statement /// 17159 // pantetheinase activity // inferred from sequence or structural similarity /// 16787 // hydrolase activity // inferred from electronic annotation /// 16810 // hydrolase activity, acting on carbon-nitrogen (but not peptide) bonds // inferred from electronic annotation /// 16811 // hydrolase activity, acting on carbon-nitroge…	6732 // coenzyme metabolism // inferred from electronic annotation /// 6807 // nitrogen compound metabolism // inferred from electronic annotation /// 6928 // cell motility // inferred from electronic annotation /// 7010 // cytoskeleton organization and biogenesis // inferred from electronic annotation /// 7165 // signal transduction // inferred from electronic annotation /// 9110 // vitamin bios…	19898 // extrinsic to membrane // non-traceable author statement	IPR003010 // Nitrilase/cyanide hydratase and apolipoprotein N-acyltransferase // 2.6E-5
2142	143341_at	-2.20196	2.38511	-18.0124	3.97e-18	7.4e-16	31.3636	FBgn0003358	CG31039	Jon99Ci	Jonah 99Ci	43545	4252 // serine-type endopeptidase activity // inferred from sequence or structural similarity /// 4252 // serine-type endopeptidase activity // non-traceable author statement /// 4263 // chymotrypsin activity // inferred from electronic annotation /// 4295 // trypsin activity // inferred from electronic annotation /// 42708 // elastase activity // non-traceable author statement /// 4252 // serine…	6508 // proteolysis // non-traceable author statement /// 7586 // digestion // non-traceable author statement /// 6508 // proteolysis // inferred from electronic annotation	---	IPR001254 // Peptidase S1, chymotrypsin // 4.8E-60
13347	154546_at	-1.15935	2.03382	-17.9638	4.29e-18	7.64e-16	31.286	FBgn0037807	CG6293	CG6293	CG6293	41259	8520 // L-ascorbate:sodium symporter activity // inferred from sequence or structural similarity /// 5515 // protein binding // inferred from physical interaction /// 5215 // transporter activity // inferred from electronic annotation /// 8520 // L-ascorbate:sodium symporter activity // inferred from sequence similarity	6139 // nucleobase, nucleoside, nucleotide and nucleic acid metabolism // inferred from electronic annotation /// 15931 // nucleobase, nucleoside, nucleotide and nucleic acid transport // inferred from electronic annotation /// 6810 // transport // inferred from electronic annotation	16020 // membrane // inferred from electronic annotation	IPR006043 // Xanthine/uracil/vitamin C permease family // 1.6E-87
1692	142891_at	-1.01391	0.823076	-17.8767	4.93e-18	8.64e-16	31.1462	FBgn0031097	CG17052	CG17052	CG17052	33022	8061 // chitin binding // inferred from electronic annotation /// 16490 // structural constituent of peritrophic membrane (sensu Insecta) // inferred from sequence or structural similarity /// 16490 // structural constituent of peritrophic membrane (sensu Insecta) // inferred from sequence similarity	6030 // chitin metabolism // inferred from electronic annotation	5576 // extracellular region // inferred from electronic annotation	IPR002557 // Chitin binding Peritrophin-A // 7.6E-17 /// IPR002557 // Chitin binding Peritrophin-A // 4.0E-17 /// IPR002557 // Chitin binding Peritrophin-A // 2.7E-13
11028	152227_at	-1.5496	2.77106	-17.827	5.34e-18	9.02e-16	31.0662	FBgn0038407	CG6126	CG6126	CG6126	41967	15101 // organic cation transporter activity // inferred from sequence or structural similarity /// 15144 // carbohydrate transporter activity // inferred from electronic annotation /// 5515 // protein binding // inferred from physical interaction /// 5215 // transporter activity // inferred from electronic annotation /// 15101 // organic cation transporter activity // inferred from sequence simi…	5975 // carbohydrate metabolism // inferred from electronic annotation /// 6812 // cation transport // inferred from electronic annotation /// 6858 // extracellular transport // inferred from electronic annotation /// 8643 // carbohydrate transport // inferred from electronic annotation /// 6810 // transport // inferred from electronic annotation	16020 // membrane // inferred from electronic annotation /// 16021 // integral to membrane // inferred from electronic annotation	IPR005828 // General substrate transporter // 1.0E-15
7678	148877_at	-2.40051	3.70979	-17.7959	5.62e-18	9.37e-16	31.0162	FBgn0042201 /// FBgn0068114	CG13061	Nplp3 /// DyakNplp3	Neuropeptide-like precursor 3 /// Nplp3	59235	5184 // neuropeptide hormone activity // non-traceable author statement	7218 // neuropeptide signaling pathway // non-traceable author statement /// 7218 // neuropeptide signaling pathway // inferred from electronic annotation	5576 // extracellular region // non-traceable author statement	---
5536	146735_at	-1.3523	1.3527	-17.37	1.12e-17	1.77e-15	30.3217	FBgn0033165	CG11113	CG11113	CG11113	35659	---	---	---	---
8952	150151_at	-2.02223	2.99004	-17.3373	1.19e-17	1.85e-15	30.2679	FBgn0038631	CG7695	CG7695	CG7695	42234	---	---	---	---
11830	153029_at	-1.95887	2.29889	-17.3068	1.25e-17	1.92e-15	30.2175	FBgn0005633	CG7445	fln	flightin	40185	---	30241 // muscle thick filament assembly // inferred from mutant phenotype	5863 // striated muscle thick filament // inferred from direct assay /// 30016 // myofibril // inferred from direct assay /// 43292 // contractile fiber // non-traceable author statement	---
11374	152573_at	-1.78817	3.6154	-17.2711	1.32e-17	1.97e-15	30.1585	---	CG10096 /// CG10097	---	---	---	---	---	---	---
3644	144843_at	-0.818427	0.594073	-17.1812	1.54e-17	2.2e-15	30.0092	FBgn0030259	CG1545	CG1545	CG1545	32036	---	---	---	---
10806	152005_at	-1.06364	0.679321	-17.1023	1.75e-17	2.45e-15	29.8778	FBgn0038946	CG7077	CG7077	CG7077	42614	16616 // oxidoreductase activity, acting on the CH-OH group of donors, NAD or NADP as acceptor // inferred from sequence or structural similarity /// 16491 // oxidoreductase activity // inferred from electronic annotation /// 16616 // oxidoreductase activity, acting on the CH-OH group of donors, NAD or NADP as acceptor // inferred from sequence similarity	8152 // metabolism // inferred from electronic annotation	---	IPR002198 // Short-chain dehydrogenase/reductase SDR // 6.4E-46
12020	153219_at	-1.7249	2.46337	-16.8974	2.47e-17	3.32e-15	29.534	FBgn0036415	CG7768	CG7768	CG7768	39573	3755 // peptidyl-prolyl cis-trans isomerase activity // inferred from sequence or structural similarity /// 5515 // protein binding // inferred from physical interaction /// 3755 // peptidyl-prolyl cis-trans isomerase activity // inferred from electronic annotation /// 16853 // isomerase activity // inferred from electronic annotation /// 3755 // peptidyl-prolyl cis-trans isomerase activity // in…	6457 // protein folding // inferred from electronic annotation /// 6605 // protein targeting // inferred from electronic annotation /// 6952 // defense response // inferred from electronic annotation	---	IPR002130 // Peptidyl-prolyl cis-trans isomerase, cyclophilin type // 3.1E-115
12040	153239_at	-0.930775	3.6526	-16.7533	3.15e-17	4.12e-15	29.2899	FBgn0033382	CG8058	CG8058	CG8058	35930	3824 // catalytic activity // inferred from electronic annotation	---	---	---
7602	148801_at	-1.37273	1.2906	-16.6341	3.85e-17	4.91e-15	29.0868	FBgn0036496	CG7804	CG7804	CG7804	39665	3729 // mRNA binding // inferred from sequence or structural similarity /// 30528 // transcription regulator activity // inferred from electronic annotation /// 166 // nucleotide binding // inferred from electronic annotation /// 3676 // nucleic acid binding // inferred from electronic annotation /// 3729 // mRNA binding // inferred from sequence similarity	398 // nuclear mRNA splicing, via spliceosome // inferred from electronic annotation /// 6357 // regulation of transcription from RNA polymerase II promoter // inferred from electronic annotation	30530 // heterogeneous nuclear ribonucleoprotein complex // inferred from sequence or structural similarity /// 30530 // heterogeneous nuclear ribonucleoprotein complex // inferred from sequence similarity	IPR000504 // RNA-binding region RNP-1 (RNA recognition motif) // 1.0E-15 /// IPR000504 // RNA-binding region RNP-1 (RNA recognition motif) // 1.2E-6
7781	148980_at	-1.9277	2.59174	-16.6389	3.82e-17	4.91e-15	29.0951	FBgn0036766	CG5506	CG5506	CG5506	39992	---	---	---	---
13622	154821_at	-2.47157	0.229926	-16.6189	3.95e-17	4.99e-15	29.0609	FBgn0043791	CG8147	CG8147	CG8147	41135	4035 // alkaline phosphatase activity // inferred from sequence or structural similarity /// 19204 // nucleotide phosphatase activity // inferred from electronic annotation /// 287 // magnesium ion binding // inferred from electronic annotation /// 8270 // zinc ion binding // inferred from electronic annotation /// 16787 // hydrolase activity // inferred from electronic annotation /// 4035 // alk…	1501 // skeletal development // inferred from electronic annotation /// 7498 // mesoderm development // inferred from electronic annotation /// 8152 // metabolism // inferred from electronic annotation	---	IPR001952 // Alkaline phosphatase // 1.6E-99
2802	144001_at	-1.28743	0.683854	-16.5314	4.59e-17	5.69e-15	28.9109	FBgn0023541	CG3540	Cyp4d14	Cyp4d14	45706	4497 // monooxygenase activity // inferred from electronic annotation /// 16491 // oxidoreductase activity // inferred from electronic annotation	6118 // electron transport // inferred from electronic annotation	5792 // microsome // non-traceable author statement /// 16020 // membrane // non-traceable author statement	IPR001128 // Cytochrome P450 // 7.8E-117
10601	151800_at	-1.79503	2.9106	-16.5144	4.73e-17	5.81e-15	28.8817	FBgn0034229	CG4847	CG4847	CG4847	36973	4216 // cathepsin K activity // inferred from sequence or structural similarity /// 8234 // cysteine-type peptidase activity // inferred from sequence or structural similarity /// 4197 // cysteine-type endopeptidase activity // inferred from electronic annotation /// 8233 // peptidase activity // inferred from electronic annotation /// 8234 // cysteine-type peptidase activity // inferred from ele…	6508 // proteolysis // inferred from electronic annotation /// 6508 // proteolysis // inferred from sequence or structural similarity /// 6508 // proteolysis // inferred from sequence similarity	---	IPR000668 // Peptidase C1A, papain // 2.7E-96 /// IPR000668 // Peptidase C1A, papain // 2.7E-96
227	141426_at	-1.92926	2.25709	-16.4695	5.1e-17	6.17e-15	28.8044	FBgn0036996	CG5932	CG5932	CG5932	40267	4806 // triacylglycerol lipase activity // inferred from sequence or structural similarity /// 3824 // catalytic activity // inferred from electronic annotation /// 16789 // carboxylic ester hydrolase activity // inferred from electronic annotation /// 4806 // triacylglycerol lipase activity // inferred from sequence similarity	6629 // lipid metabolism // inferred from electronic annotation /// 16042 // lipid catabolism // inferred from electronic annotation	---	IPR000073 // Alpha/beta hydrolase fold // 2.2E-14 /// IPR006693 // Ab-hydrolase associated lipase region // 1.1E-21
11825	153024_at	-1.28415	4.82747	-16.2976	6.87e-17	8.22e-15	28.5068	FBgn0004551	CG3725	Ca-P60A	Calcium ATPase at 60A	49297	5388 // calcium-transporting ATPase activity // inferred from sequence or structural similarity /// 5388 // calcium-transporting ATPase activity // non-traceable author statement /// 5524 // ATP binding // inferred from electronic annotation /// 16820 // hydrolase activity, acting on acid anhydrides, catalyzing transmembrane movement of substances // inferred from electronic annotation /// 166 //…	6816 // calcium ion transport // non-traceable author statement /// 6874 // calcium ion homeostasis // inferred from electronic annotation /// 7274 // neuromuscular synaptic transmission // inferred from mutant phenotype /// 8152 // metabolism // inferred from electronic annotation /// 51282 // regulation of sequestering of calcium ion // inferred from mutant phenotype /// 6810 // transport // in…	5635 // nuclear envelope // inferred from direct assay /// 5783 // endoplasmic reticulum // inferred from direct assay /// 5783 // endoplasmic reticulum // inferred from sequence or structural similarity /// 5789 // endoplasmic reticulum membrane // non-traceable author statement /// 16021 // integral to membrane // non-traceable author statement /// 16529 // sarcoplasmic reticulum // non-traceab…	IPR006068 // Cation transporting ATPase, C-terminal // 8.1E-82 /// IPR008250 // E1-E2 ATPase-associated region // 1.5E-125 /// IPR005834 // Haloacid dehalogenase-like hydrolase // 5.3E-15 /// IPR004014 // Cation transporting ATPase, N-terminal // 3.9E-32
5329	146528_at	-1.65133	1.56542	-16.264	7.28e-17	8.43e-15	28.4483	FBgn0032839	CG10659	CG10659	CG10659	35285	---	---	---	---
10627	151826_at	-1.62354	3.79652	-16.2683	7.22e-17	8.43e-15	28.4557	FBgn0037913	CG6783	CG6783	CG6783	3772232	5215 // transporter activity // inferred from electronic annotation /// 5504 // fatty acid binding // inferred from sequence or structural similarity /// 5488 // binding // inferred from electronic annotation /// 8289 // lipid binding // inferred from electronic annotation /// 5504 // fatty acid binding // inferred from sequence similarity	6810 // transport // inferred from electronic annotation	5743 // mitochondrial inner membrane // inferred from electronic annotation /// 16020 // membrane // inferred from electronic annotation /// 16021 // integral to membrane // inferred from electronic annotation	IPR000566 // Lipocalin-related protein and Bos/Can/Equ allergen // 1.6E-36
7223	148422_at	-2.72119	2.82563	-16.1797	8.43e-17	9.6e-15	28.3012	FBgn0035926	CG5804	CG5804	CG5804	39005	62 // acyl-CoA binding // inferred from sequence or structural similarity /// 4857 // enzyme inhibitor activity // inferred from sequence or structural similarity /// 5386 // carrier activity // inferred from electronic annotation /// 50809 // diazepam binding // inferred from sequence or structural similarity /// 62 // acyl-CoA binding // inferred from electronic annotation /// 62 // acyl-CoA bi…	6869 // lipid transport // inferred from electronic annotation /// 42049 // cell acyl-CoA homeostasis // inferred from sequence or structural similarity /// 42049 // cell acyl-CoA homeostasis // inferred from sequence similarity	---	IPR000582 // Acyl-coA-binding protein, ACBP // 2.7E-15
10513	151712_at	-0.960703	1.11648	-16.1531	8.83e-17	9.9e-15	28.2546	FBgn0031097	CG17052	CG17052	CG17052	33022	8061 // chitin binding // inferred from electronic annotation /// 16490 // structural constituent of peritrophic membrane (sensu Insecta) // inferred from sequence or structural similarity /// 16490 // structural constituent of peritrophic membrane (sensu Insecta) // inferred from sequence similarity	6030 // chitin metabolism // inferred from electronic annotation	5576 // extracellular region // inferred from electronic annotation	IPR002557 // Chitin binding Peritrophin-A // 7.6E-17 /// IPR002557 // Chitin binding Peritrophin-A // 4.0E-17 /// IPR002557 // Chitin binding Peritrophin-A // 2.7E-13
970	142169_at	-1.28384	2.07398	-16.0364	1.08e-16	1.19e-14	28.0496	FBgn0038749	CG4468	CG4468	CG4468	42373	5515 // protein binding // inferred from physical interaction	---	---	---
6534	147733_r_at	-1.15983	0.650592	-16.0153	1.12e-16	1.22e-14	28.0124	FBgn0034809	CG13542	CG13542	CG13542	37653	---	---	---	---
12591	153790_at	-1.70155	2.49595	-16.017	1.12e-16	1.22e-14	28.0153	FBgn0028325	CG7010	l(1)G0334	lethal (1) G0334	31406	4739 // pyruvate dehydrogenase (acetyl-transferring) activity // inferred from sequence or structural similarity /// 16624 // oxidoreductase activity, acting on the aldehyde or oxo group of donors, disulfide as acceptor // inferred from electronic annotation /// 4739 // pyruvate dehydrogenase (acetyl-transferring) activity // inferred from sequence similarity	6090 // pyruvate metabolism // inferred from sequence or structural similarity /// 6099 // tricarboxylic acid cycle // inferred from electronic annotation /// 8152 // metabolism // inferred from electronic annotation /// 6090 // pyruvate metabolism // inferred from sequence similarity	45254 // pyruvate dehydrogenase complex // inferred from sequence or structural similarity /// 45254 // pyruvate dehydrogenase complex // inferred from sequence similarity	IPR001017 // Dehydrogenase, E1 component // 1.0E-126 /// IPR001017 // Dehydrogenase, E1 component // 1.0E-126 /// IPR001017 // Dehydrogenase, E1 component // 1.0E-126
11579	152778_at	-2.16022	2.57086	-15.9516	1.26e-16	1.34e-14	27.8998	FBgn0039872	CG2196	CG2196	CG2196	43742	8324 // cation transporter activity // inferred from electronic annotation /// 8507 // sodium:iodide symporter activity // inferred from sequence or structural similarity /// 5215 // transporter activity // inferred from electronic annotation /// 8507 // sodium:iodide symporter activity // inferred from sequence similarity	6732 // coenzyme metabolism // inferred from electronic annotation /// 6812 // cation transport // inferred from electronic annotation /// 6858 // extracellular transport // inferred from electronic annotation /// 51189 // prosthetic group metabolism // inferred from electronic annotation /// 6810 // transport // inferred from electronic annotation	16020 // membrane // inferred from electronic annotation	---
11437	152636_at	-1.44476	4.99707	-15.9282	1.31e-16	1.39e-14	27.8584	FBgn0031066 /// FBgn0042132	CG14235	CG14235 /// CG18809	CG14235 /// CG18809	32989 /// 59170	4129 // cytochrome-c oxidase activity // inferred from sequence or structural similarity /// 4129 // cytochrome-c oxidase activity // inferred from sequence similarity	6118 // electron transport // inferred from electronic annotation /// 6119 // oxidative phosphorylation // inferred from electronic annotation /// 6123 // mitochondrial electron transport, cytochrome c to oxygen // inferred from sequence or structural similarity /// 6123 // mitochondrial electron transport, cytochrome c to oxygen // inferred from sequence similarity	5751 // respiratory chain complex IV (sensu Eukaryota) // inferred from sequence or structural similarity /// 5751 // respiratory chain complex IV (sensu Eukaryota) // inferred from sequence similarity	IPR003213 // Cytochrome oxidase c, subunit VIb // 2.6E-42 /// IPR003213 // Cytochrome oxidase c, subunit VIb // 2.6E-42
27	141226_at	-2.05675	2.50009	-15.8492	1.51e-16	1.55e-14	27.7181	FBgn0038293	CG6904	CG6904	CG6904	41823	4373 // glycogen (starch) synthase activity // non-traceable author statement /// 5515 // protein binding // inferred from physical interaction /// 4373 // glycogen (starch) synthase activity // inferred from electronic annotation /// 16740 // transferase activity // inferred from electronic annotation /// 16757 // transferase activity, transferring glycosyl groups // inferred from electronic ann…	5978 // glycogen biosynthesis // non-traceable author statement /// 5978 // glycogen biosynthesis // inferred from electronic annotation	---	IPR008631 // Glycogen synthase // 1.0E-126 /// IPR008631 // Glycogen synthase // 1.0E-126
4078	145277_at	-1.18867	-0.0794428	-15.7712	1.73e-16	1.77e-14	27.5791	FBgn0030895	CG7135	CG7135	CG7135	32793	16301 // kinase activity // inferred from electronic annotation /// 16740 // transferase activity // inferred from electronic annotation	---	---	IPR004119 // Protein of unknown function DUF227 // 1.4E-110
11163	152362_at	-2.43915	4.13732	-15.7407	1.83e-16	1.85e-14	27.5245	FBgn0011559	CG7157	Acp36DE	Accessory gland peptide 36DE	35096	5179 // hormone activity // non-traceable author statement	7321 // sperm displacement // non-traceable author statement /// 42628 // mating plug formation // traceable author statement /// 45434 // negative regulation of female receptivity, post-mating // non-traceable author statement /// 46692 // sperm competition // traceable author statement /// 46693 // sperm storage // inferred from mutant phenotype /// 46693 // sperm storage // traceable author st…	5576 // extracellular region // non-traceable author statement /// 5576 // extracellular region // traceable author statement	---
5124	146323_at	-2.17038	4.45456	-15.7064	1.94e-16	1.9e-14	27.4631	FBgn0032494	CG5945	CG5945	CG5945	34729	5515 // protein binding // inferred from physical interaction	---	---	IPR004272 // Odorant binding protein // 1.9E-47
1952	143151_at	-1.92335	4.89511	-15.4917	2.85e-16	2.75e-14	27.0762	FBgn0000592	CG6917	Est-6	Esterase 6	39392	4091 // carboxylesterase activity // non-traceable author statement /// 4091 // carboxylesterase activity // traceable author statement /// 5102 // receptor binding // inferred from electronic annotation /// 3824 // catalytic activity // inferred from electronic annotation /// 4091 // carboxylesterase activity // inferred from electronic annotation /// 4759 // serine esterase activity // inferred…	7165 // signal transduction // inferred from electronic annotation /// 7267 // cell-cell signaling // inferred from electronic annotation /// 7618 // mating // traceable author statement /// 7619 // courtship behavior // inferred from mutant phenotype /// 19953 // sexual reproduction // non-traceable author statement /// 30728 // ovulation // traceable author statement /// 42811 // pheromone bios…	---	IPR002018 // Carboxylesterase, type B // 1.0E-126 /// IPR002018 // Carboxylesterase, type B // 1.0E-126
9512	150711_at	-1.16405	1.46019	-15.4111	3.3e-16	3.14e-14	26.9299	FBgn0039485	CG17189	CG17189	CG17189	43263	---	---	---	IPR004272 // Odorant binding protein // 3.8E-59
11765	152964_at	-0.982292	2.04103	-15.4112	3.3e-16	3.14e-14	26.93	FBgn0033915	CG8485	CG8485	CG8485	36579	4674 // protein serine/threonine kinase activity // non-traceable author statement /// 5524 // ATP binding // inferred from electronic annotation /// 16909 // SAP kinase activity // inferred from sequence or structural similarity /// 166 // nucleotide binding // inferred from electronic annotation /// 4672 // protein kinase activity // inferred from electronic annotation /// 4674 // protein serin…	6468 // protein amino acid phosphorylation // non-traceable author statement /// 6468 // protein amino acid phosphorylation // inferred from electronic annotation	---	IPR000719 // Protein kinase // 2.4E-88
13531	154730_at	-1.4639	2.25702	-15.2652	4.3e-16	3.99e-14	26.6633	FBgn0034618	CG9485	CG9485	CG9485	37435	4134 // 4-alpha-glucanotransferase activity // inferred from sequence or structural similarity /// 4135 // amylo-alpha-1,6-glucosidase activity // inferred from sequence or structural similarity /// 16799 // hydrolase activity, hydrolyzing N-glycosyl compounds // inferred from electronic annotation /// 4135 // amylo-alpha-1,6-glucosidase activity // inferred from electronic annotation /// 4134 //…	5977 // glycogen metabolism // inferred from electronic annotation /// 5978 // glycogen biosynthesis // inferred from electronic annotation	---	IPR010401 // Amylo-alpha-1,6-glucosidase // 1.0E-126 /// IPR010401 // Amylo-alpha-1,6-glucosidase // 1.0E-126 /// IPR010401 // Amylo-alpha-1,6-glucosidase // 1.0E-126
1183	142382_at	-1.33745	-0.274554	-15.2474	4.44e-16	4.09e-14	26.6306	FBgn0026577	CG8677	CG8677	CG8677	35397	3677 // DNA binding // inferred from electronic annotation /// 5515 // protein binding // inferred from electronic annotation /// 8270 // zinc ion binding // inferred from electronic annotation	6355 // regulation of transcription, DNA-dependent // inferred from electronic annotation	---	IPR001965 // Zn-finger-like, PHD finger // 2.2E-12
12802	154001_at	-1.63821	1.62831	-15.185	4.98e-16	4.5e-14	26.5159	FBgn0030607	CG5560	CG5560	CG5560	32436	---	6629 // lipid metabolism // inferred from electronic annotation	---	IPR002641 // Patatin // 2.4E-41
6154	147353_at	-1.58938	3.19826	-15.1593	5.22e-16	4.61e-14	26.4686	FBgn0034198	CG11400	CG11400	CG11400	36935	---	---	---	---
1268	142467_at	-0.926406	0.194663	-15.0472	6.41e-16	5.51e-14	26.2612	---	CG33950	---	---	---	5198 // structural molecule activity // inferred from electronic annotation	7155 // cell adhesion // inferred from electronic annotation	31012 // extracellular matrix // inferred from electronic annotation	---
9191	150390_at	-0.761346	1.22202	-14.9677	7.42e-16	6.29e-14	26.1135	FBgn0039002	CG17625	CG17625	CG17625	42678	---	---	---	IPR001660 // Sterile alpha motif SAM // 1.2E-9
2626	143825_at	-2.07657	3.90379	-14.9366	7.86e-16	6.6e-14	26.0555	FBgn0015584 /// FBgn0064259	CG8622	Acp53Ea /// DyakAcp53Ea	Accessory gland-specific peptide 53Ea /// Acp53Ea	36874	5179 // hormone activity // non-traceable author statement /// 5515 // protein binding // inferred from physical interaction	7321 // sperm displacement // non-traceable author statement /// 7582 // physiological process // non-traceable author statement /// 45297 // post-mating behavior // non-traceable author statement /// 46692 // sperm competition // traceable author statement /// 7610 // behavior // inferred from electronic annotation	5576 // extracellular region // non-traceable author statement	IPR009392 // Drosophila ACP53EA // 6.0E-106
4832	146031_at	-1.4492	3.39979	-14.9282	7.98e-16	6.66e-14	26.0398	FBgn0040098	CG17799	lectin-29Ca	lectin-29Ca	53547	5534 // galactose binding // inferred from sequence or structural similarity /// 5534 // galactose binding // inferred from sequence similarity	7283 // spermatogenesis // inferred from electronic annotation	---	IPR001304 // C-type lectin // 3.9E-5
11397	152596_at	-0.737523	0.185426	-14.8913	8.55e-16	7.05e-14	25.9709	FBgn0031808	CG9507	CG9507	CG9507	33892	4222 // metalloendopeptidase activity // inferred from sequence or structural similarity /// 4245 // neprilysin activity // inferred from electronic annotation /// 8270 // zinc ion binding // inferred from electronic annotation /// 8237 // metallopeptidase activity // inferred from electronic annotation /// 8233 // peptidase activity // inferred from electronic annotation /// 16787 // hydrolase a…	6508 // proteolysis // inferred from electronic annotation	16020 // membrane // inferred from electronic annotation	IPR000718 // Peptidase M13, neprilysin // 1.2E-5 /// IPR000718 // Peptidase M13, neprilysin // 1.9E-13 /// IPR008753 // Peptidase M13 // 7.1E-7
1132	142331_i_at	-1.28102	0.775299	-14.8684	8.92e-16	7.31e-14	25.928	FBgn0034740	CG3875	CG3875	CG3875	37577	3729 // mRNA binding // inferred from electronic annotation	6139 // nucleobase, nucleoside, nucleotide and nucleic acid metabolism // inferred from electronic annotation /// 6744 // ubiquinone biosynthesis // inferred from sequence or structural similarity /// 6915 // apoptosis // inferred from electronic annotation /// 7283 // spermatogenesis // inferred from electronic annotation /// 8283 // cell proliferation // inferred from electronic annotation /// …	---	---
10692	151891_at	-1.20184	0.179018	-14.8141	9.87e-16	8.04e-14	25.8261	FBgn0024997	CG2681	CG2681	CG2681	31258	4842 // ubiquitin-protein ligase activity // inferred from electronic annotation /// 8270 // zinc ion binding // inferred from electronic annotation	6511 // ubiquitin-dependent protein catabolism // inferred from electronic annotation /// 7275 // development // inferred from electronic annotation /// 16567 // protein ubiquitination // inferred from electronic annotation	151 // ubiquitin ligase complex // inferred from electronic annotation /// 5634 // nucleus // inferred from electronic annotation	IPR004162 // Seven in absentia protein family // 6.9E-123
7601	148800_at	-1.03845	0.889123	-14.7368	1.14e-15	9.13e-14	25.6806	FBgn0036495	CG33259	CG33259	CG33259	2768950	---	---	---	IPR002919 // Trypsin inhibitor-like, cysteine-rich TIL region // 1.0E-17
2677	143876_at	-1.69371	2.04425	-14.7103	1.2e-15	9.45e-14	25.6307	FBgn0016675	CG9976	Lectin-galC1	Galactose-specific C-type lectin	35216	4872 // receptor activity // traceable author statement /// 5529 // sugar binding // non-traceable author statement /// 5534 // galactose binding // inferred from direct assay /// 5534 // galactose binding // non-traceable author statement /// 5515 // protein binding // inferred from physical interaction /// 5529 // sugar binding // inferred from electronic annotation	6952 // defense response // non-traceable author statement	---	IPR001304 // C-type lectin // 3.9E-14
6904	148103_at	-3.39428	3.59024	-14.7097	1.2e-15	9.45e-14	25.6295	FBgn0035434	CG10812	dro5	drosomycin-5	38409	8200 // ion channel inhibitor activity // inferred from electronic annotation	6952 // defense response // non-traceable author statement /// 9405 // pathogenesis // inferred from electronic annotation /// 6952 // defense response // inferred from electronic annotation	5576 // extracellular region // inferred from electronic annotation	IPR008176 // Gamma thionin // 5.4E-18
10620	151819_at	-1.0235	2.05454	-14.6689	1.3e-15	1.01e-13	25.5524	FBgn0038878	CG3301	CG3301	CG3301	42528	16616 // oxidoreductase activity, acting on the CH-OH group of donors, NAD or NADP as acceptor // inferred from sequence or structural similarity /// 42802 // identical protein binding // inferred from physical interaction /// 16491 // oxidoreductase activity // inferred from electronic annotation /// 16616 // oxidoreductase activity, acting on the CH-OH group of donors, NAD or NADP as acceptor /…	8152 // metabolism // inferred from electronic annotation	---	IPR002198 // Short-chain dehydrogenase/reductase SDR // 3.2E-36
10636	151835_at	-1.15391	0.983748	-14.662	1.31e-15	1.02e-13	25.5393	FBgn0035734	CG14823	CG14823	CG14823	38772	---	---	---	IPR008597 // Destabilase // 1.4E-71
1054	142253_at	-1.57931	2.74185	-14.6245	1.41e-15	1.08e-13	25.4683	FBgn0039325	CG10560	CG10560	CG10560	43065	16301 // kinase activity // inferred from electronic annotation /// 16740 // transferase activity // inferred from electronic annotation	---	---	IPR004119 // Protein of unknown function DUF227 // 6.7E-111
4817	146016_at	-1.55079	3.05477	-14.61	1.45e-15	1.1e-13	25.4407	FBgn0028987	CG8137	Spn2	Serine protease inhibitor 2	49807	4867 // serine-type endopeptidase inhibitor activity // inferred from sequence or structural similarity /// 4867 // serine-type endopeptidase inhibitor activity // non-traceable author statement /// 42562 // hormone binding // inferred from sequence or structural similarity /// 4867 // serine-type endopeptidase inhibitor activity // inferred from electronic annotation /// 8233 // peptidase activi…	6508 // proteolysis // inferred from electronic annotation /// 45861 // negative regulation of proteolysis // inferred from sequence or structural similarity /// 45861 // negative regulation of proteolysis // inferred from sequence similarity	---	IPR000215 // Serpin // 1.2E-112
11243	152442_at	-1.5347	1.96775	-14.6008	1.47e-15	1.12e-13	25.4232	FBgn0051233	CG31233	CG31233	CG31233	42557	4179 // membrane alanyl aminopeptidase activity // inferred from sequence or structural similarity /// 4179 // membrane alanyl aminopeptidase activity // inferred from electronic annotation /// 4179 // membrane alanyl aminopeptidase activity // inferred from sequence similarity	6508 // proteolysis // inferred from electronic annotation	---	IPR001930 // Peptidase M1, membrane alanine aminopeptidase // 1.0E-126
3321	144520_at	-1.66663	1.68822	-14.5207	1.71e-15	1.27e-13	25.2708	FBgn0029765	CG16756	CG16756	CG16756	31460	3796 // lysozyme activity // non-traceable author statement	6960 // antimicrobial humoral response (sensu Protostomia) // non-traceable author statement	5576 // extracellular region // inferred from electronic annotation	IPR001916 // Glycoside hydrolase, family 22 // 4.0E-37
10780	151979_at	-1.11986	3.79898	-14.4744	1.87e-15	1.38e-13	25.1824	FBgn0019960	CG6455	CG6455	CG6455	42587	---	---	5743 // mitochondrial inner membrane // inferred from sequence or structural similarity /// 5739 // mitochondrion // inferred from electronic annotation /// 16020 // membrane // inferred from electronic annotation /// 16021 // integral to membrane // inferred from electronic annotation /// 5743 // mitochondrial inner membrane // inferred from sequence similarity	---
1203	142402_at	-1.40245	1.5392	-14.4518	1.95e-15	1.42e-13	25.1392	FBgn0037678	CG16749	CG16749	CG16749	41111	4252 // serine-type endopeptidase activity // inferred from sequence or structural similarity /// 4252 // serine-type endopeptidase activity // non-traceable author statement /// 4263 // chymotrypsin activity // inferred from electronic annotation /// 4295 // trypsin activity // inferred from electronic annotation /// 4252 // serine-type endopeptidase activity // inferred from electronic annotati…	6508 // proteolysis // non-traceable author statement /// 6508 // proteolysis // inferred from electronic annotation	---	IPR001254 // Peptidase S1, chymotrypsin // 5.2E-67
2073	143272_at	-1.44628	3.24277	-14.4118	2.11e-15	1.53e-13	25.0625	FBgn0002855	CG8982	Acp26Aa	Accessory gland-specific peptide 26Aa	33817	5179 // hormone activity // non-traceable author statement	7321 // sperm displacement // non-traceable author statement /// 7618 // mating // inferred from electronic annotation /// 18991 // oviposition // non-traceable author statement /// 18991 // oviposition // traceable author statement /// 30728 // ovulation // inferred from mutant phenotype /// 30728 // ovulation // traceable author statement /// 45297 // post-mating behavior // non-traceable autho…	5576 // extracellular region // non-traceable author statement	IPR004315 // Male Drosophila accessory gland secretory protein // 1.0E-126
3694	144893_at	-1.32396	0.990731	-14.4103	2.11e-15	1.53e-13	25.0597	FBgn0030332	CG9360	CG9360	CG9360	32128	16614 // oxidoreductase activity, acting on CH-OH group of donors // inferred from sequence or structural similarity /// 5515 // protein binding // inferred from physical interaction /// 16491 // oxidoreductase activity // inferred from electronic annotation /// 16614 // oxidoreductase activity, acting on CH-OH group of donors // inferred from sequence similarity	8152 // metabolism // inferred from electronic annotation	---	IPR002198 // Short-chain dehydrogenase/reductase SDR // 1.1E-39
2673	143872_at	-1.4584	1.9203	-14.3323	2.45e-15	1.74e-13	24.9097	FBgn0016123	CG1462	Aph-4	Alkaline phosphatase 4	43671	4035 // alkaline phosphatase activity // inferred from sequence or structural similarity /// 4035 // alkaline phosphatase activity // non-traceable author statement /// 19204 // nucleotide phosphatase activity // inferred from electronic annotation /// 287 // magnesium ion binding // inferred from electronic annotation /// 4035 // alkaline phosphatase activity // inferred from electronic annotati…	1501 // skeletal development // inferred from electronic annotation /// 7399 // nervous system development // inferred from expression pattern /// 7498 // mesoderm development // inferred from electronic annotation /// 8152 // metabolism // inferred from electronic annotation /// 42045 // epithelial fluid transport // inferred from mutant phenotype	46658 // anchored to plasma membrane // inferred from sequence or structural similarity /// 16020 // membrane // inferred from electronic annotation /// 16021 // integral to membrane // inferred from electronic annotation /// 46658 // anchored to plasma membrane // inferred from sequence similarity	IPR001952 // Alkaline phosphatase // 3.0E-77 /// IPR001952 // Alkaline phosphatase // 9.8E-89
11667	152866_at	-1.86972	3.85691	-14.3362	2.43e-15	1.74e-13	24.9173	FBgn0031689	CG10833	Cyp28d1	Cyp28d1	33749	4497 // monooxygenase activity // inferred from electronic annotation /// 16491 // oxidoreductase activity // inferred from electronic annotation /// 5515 // protein binding // inferred from physical interaction /// 5506 // iron ion binding // inferred from electronic annotation /// 20037 // heme binding // inferred from electronic annotation /// 46872 // metal ion binding // inferred from electr…	6118 // electron transport // inferred from electronic annotation /// 8202 // steroid metabolism // inferred from electronic annotation	5792 // microsome // non-traceable author statement /// 16020 // membrane // non-traceable author statement /// 5783 // endoplasmic reticulum // inferred from electronic annotation /// 5792 // microsome // inferred from electronic annotation /// 16020 // membrane // inferred from electronic annotation	IPR001128 // Cytochrome P450 // 4.4E-74
4335	145534_at	-1.93712	1.69123	-14.2933	2.64e-15	1.84e-13	24.8344	FBgn0043364	CG4427	cbt	cabut	33224	3676 // nucleic acid binding // inferred from electronic annotation /// 8270 // zinc ion binding // inferred from electronic annotation /// 16563 // transcriptional activator activity // inferred from sequence or structural similarity /// 46872 // metal ion binding // inferred from electronic annotation /// 16563 // transcriptional activator activity // inferred from sequence similarity	1736 // establishment of planar polarity // non-traceable author statement /// 6357 // regulation of transcription from RNA polymerase II promoter // inferred from electronic annotation /// 7254 // JNK cascade // non-traceable author statement /// 7390 // germ-band shortening // non-traceable author statement /// 7391 // dorsal closure // non-traceable author statement /// 7423 // sensory organ d…	5634 // nucleus // inferred from electronic annotation	IPR007087 // Zn-finger, C2H2 type // 1.7E-6 /// IPR007087 // Zn-finger, C2H2 type // 1.9E-7 /// IPR007087 // Zn-finger, C2H2 type // 3.2E-5 /// IPR007087 // Zn-finger, C2H2 type // 1.7E-6 /// IPR007087 // Zn-finger, C2H2 type // 1.9E-7 /// IPR007087 // Zn-finger, C2H2 type // 3.2E-5
5388	146587_at	-2.01454	2.22396	-14.2385	2.93e-15	2.02e-13	24.7286	FBgn0032947	CG17571	CG17571	CG17571	35409	4252 // serine-type endopeptidase activity // inferred from sequence or structural similarity /// 4263 // chymotrypsin activity // inferred from electronic annotation /// 4295 // trypsin activity // non-traceable author statement /// 4252 // serine-type endopeptidase activity // inferred from sequence similarity	6508 // proteolysis // non-traceable author statement	---	IPR001254 // Peptidase S1, chymotrypsin // 3.6E-83
1798	142997_at	-1.23513	1.13219	-14.1105	3.76e-15	2.54e-13	24.4799	FBgn0039124	CG13597	CG13597	CG13597	42823	3676 // nucleic acid binding // inferred from electronic annotation /// 3697 // single-stranded DNA binding // inferred from electronic annotation /// 16301 // kinase activity // inferred from electronic annotation	165 // MAPKKK cascade // inferred from electronic annotation /// 7165 // signal transduction // inferred from electronic annotation /// 7242 // intracellular signaling cascade // inferred from electronic annotation /// 7275 // development // inferred from electronic annotation /// 7276 // gametogenesis // inferred from electronic annotation /// 7283 // spermatogenesis // inferred from electronic …	---	IPR001487 // Bromodomain // 7.4E-34
6801	148000_at	-0.802704	0.575462	-14.0867	3.93e-15	2.65e-13	24.4334	FBgn0035265	CG18173	CG18173	CG18173	38220	16407 // acetyltransferase activity // inferred from electronic annotation	6506 // GPI anchor biosynthesis // inferred from electronic annotation	5789 // endoplasmic reticulum membrane // inferred from electronic annotation /// 16021 // integral to membrane // inferred from electronic annotation	IPR009447 // GWT1 // 9.2E-93
10774	151973_at	-1.20637	3.45387	-14.0537	4.19e-15	2.81e-13	24.369	FBgn0042138	CG18815	CG18815	CG18815	59176	4620 // phospholipase activity // inferred from electronic annotation /// 16298 // lipase activity // inferred from electronic annotation /// 16787 // hydrolase activity // inferred from electronic annotation /// 16788 // hydrolase activity, acting on ester bonds // inferred from electronic annotation /// 3824 // catalytic activity // inferred from electronic annotation	6629 // lipid metabolism // inferred from electronic annotation /// 8152 // metabolism // inferred from electronic annotation /// 6631 // fatty acid metabolism // inferred from electronic annotation	---	IPR003140 // Phospholipase/Carboxylesterase // 8.9E-91
5057	146256_at	-3.13318	1.87781	-13.9867	4.78e-15	3.19e-13	24.2376	FBgn0032381	CG14934	CG14934	CG14934	34597	4556 // alpha-amylase activity // inferred from electronic annotation /// 4558 // alpha-glucosidase activity // inferred from sequence or structural similarity /// 5215 // transporter activity // inferred from electronic annotation /// 4558 // alpha-glucosidase activity // inferred from sequence similarity	5975 // carbohydrate metabolism // inferred from electronic annotation	---	IPR006047 // Alpha amylase, catalytic domain // 3.0E-113
3032	144231_at	-1.0874	1.55918	-13.982	4.82e-15	3.2e-13	24.2284	FBgn0028532	CG7968	CG7968	CG7968	34802	---	---	---	---
11194	152393_at	-1.32751	3.61615	-13.9682	4.95e-15	3.27e-13	24.2013	FBgn0030593	CG9512	CG9512	CG9512	32419	8812 // choline dehydrogenase activity // inferred from sequence or structural similarity /// 50660 // FAD binding // inferred from electronic annotation /// 16491 // oxidoreductase activity // inferred from electronic annotation /// 16614 // oxidoreductase activity, acting on CH-OH group of donors // inferred from electronic annotation /// 8812 // choline dehydrogenase activity // inferred from …	6118 // electron transport // inferred from electronic annotation /// 6066 // alcohol metabolism // inferred from electronic annotation	---	IPR000172 // Glucose-methanol-choline oxidoreductase // 9.6E-85 /// IPR007867 // GMC oxidoreductase // 9.8E-48
6036	147235_at	-1.59002	1.98876	-13.922	5.42e-15	3.53e-13	24.1103	FBgn0033999	CG8093	CG8093	CG8093	36686	4806 // triacylglycerol lipase activity // inferred from sequence or structural similarity /// 16298 // lipase activity // inferred from sequence or structural similarity /// 5515 // protein binding // inferred from physical interaction /// 3824 // catalytic activity // inferred from electronic annotation /// 16787 // hydrolase activity // inferred from electronic annotation /// 16789 // carboxyl…	6629 // lipid metabolism // inferred from electronic annotation /// 6629 // lipid metabolism // inferred from sequence or structural similarity /// 16042 // lipid catabolism // inferred from electronic annotation /// 6629 // lipid metabolism // inferred from sequence similarity	---	IPR006693 // Ab-hydrolase associated lipase region // 2.1E-27
5557	146756_at	-1.35962	0.789298	-13.9097	5.55e-15	3.6e-13	24.0861	FBgn0033203	CG2070	CG2070	CG2070	35706	16491 // oxidoreductase activity // inferred from sequence or structural similarity /// 16491 // oxidoreductase activity // inferred from electronic annotation /// 16491 // oxidoreductase activity // inferred from sequence similarity	8152 // metabolism // inferred from electronic annotation	---	IPR002198 // Short-chain dehydrogenase/reductase SDR // 1.0E-41
1000	142199_at	-1.42121	1.92428	-13.9054	5.6e-15	3.61e-13	24.0777	FBgn0029608	CG3091	CG3091	CG3091	31210	5386 // carrier activity // inferred from electronic annotation /// 8431 // vitamin E binding // inferred from sequence or structural similarity /// 5215 // transporter activity // inferred from electronic annotation /// 8431 // vitamin E binding // inferred from sequence similarity	6732 // coenzyme metabolism // inferred from electronic annotation /// 6810 // transport // inferred from electronic annotation /// 51189 // prosthetic group metabolism // inferred from electronic annotation	5622 // intracellular // inferred from electronic annotation	IPR001251 // Cellular retinaldehyde-binding)/triple function, C-terminal // 2.1E-14
2691	143890_at	-1.19025	1.60921	-13.9038	5.61e-15	3.61e-13	24.0745	FBgn0017448	CG2187	CG2187	CG2187	43743	8324 // cation transporter activity // inferred from electronic annotation /// 8507 // sodium:iodide symporter activity // inferred from sequence or structural similarity /// 5215 // transporter activity // inferred from electronic annotation /// 8507 // sodium:iodide symporter activity // inferred from sequence similarity	6732 // coenzyme metabolism // inferred from electronic annotation /// 6812 // cation transport // inferred from electronic annotation /// 6858 // extracellular transport // inferred from electronic annotation /// 51189 // prosthetic group metabolism // inferred from electronic annotation /// 6810 // transport // inferred from electronic annotation /// 6811 // ion transport // inferred from elect…	16020 // membrane // inferred from electronic annotation /// 16021 // integral to membrane // inferred from electronic annotation	IPR001734 // Na+/solute symporter // 1.6E-11 /// IPR001734 // Na+/solute symporter // 8.9E-6
1072	142271_at	-1.33137	2.56687	-13.8995	5.66e-15	3.62e-13	24.0661	FBgn0026314	CG6649	Ugt35b	UDP-glycosyltransferase 35b	41333	15020 // glucuronosyltransferase activity // inferred from sequence or structural similarity /// 15020 // glucuronosyltransferase activity // non-traceable author statement /// 16740 // transferase activity // inferred from electronic annotation /// 16757 // transferase activity, transferring glycosyl groups // inferred from electronic annotation /// 16758 // transferase activity, transferring he…	5976 // polysaccharide metabolism // inferred from electronic annotation /// 6952 // defense response // inferred from electronic annotation /// 8202 // steroid metabolism // inferred from electronic annotation /// 9636 // response to toxin // inferred from electronic annotation /// 8152 // metabolism // inferred from electronic annotation	---	IPR002213 // UDP-glucoronosyl/UDP-glucosyl transferase // 5.4E-93
2387	143586_at	-1.46239	4.17303	-13.898	5.68e-15	3.62e-13	24.063	FBgn0010217	CG11154	ATPsyn-	ATP synthase-	43829	166 // nucleotide binding // inferred from electronic annotation /// 5524 // ATP binding // inferred from electronic annotation /// 8553 // hydrogen-exporting ATPase activity, phosphorylative mechanism // inferred from sequence or structural similarity /// 46933 // hydrogen-transporting ATP synthase activity, rotational mechanism // inferred from electronic annotation /// 46961 // hydrogen-transp…	6144 // purine base metabolism // inferred from electronic annotation /// 6754 // ATP biosynthesis // inferred from electronic annotation /// 6928 // cell motility // inferred from electronic annotation /// 7010 // cytoskeleton organization and biogenesis // inferred from electronic annotation /// 15986 // ATP synthesis coupled proton transport // inferred from electronic annotation /// 15992 // …	275 // proton-transporting ATP synthase complex, catalytic core F(1) (sensu Eukaryota) // inferred from sequence or structural similarity /// 5739 // mitochondrion // inferred from electronic annotation /// 16021 // integral to membrane // inferred from electronic annotation /// 16469 // proton-transporting two-sector ATPase complex // inferred from electronic annotation /// 45255 // hydrogen-tra…	IPR004100 // H+-transporting two-sector ATPase, alpha/beta subunit, N-terminal // 3.0E-31 /// IPR000194 // H+-transporting two-sector ATPase, alpha/beta subunit, central region // 3.8E-85 /// IPR000793 // H+-transporting two-sector ATPase, alpha/beta subunit, C-terminal // 1.2E-51
11232	152431_at	-1.91629	3.66508	-13.8497	6.24e-15	3.96e-13	23.9677	FBgn0028480	CG17841	CG17841	CG17841	31965	5515 // protein binding // inferred from physical interaction	---	16021 // integral to membrane // inferred from electronic annotation	IPR010283 // Eukaryotic protein of unknown function DUF887 // 3.0E-5
2713	143912_at	-1.21842	3.63405	-13.8337	6.44e-15	4.06e-13	23.9361	FBgn0020236	CG8322	ATPCL	ATP citrate lyase	36760	3878 // ATP citrate synthase activity // inferred from sequence or structural similarity /// 3878 // ATP citrate synthase activity // non-traceable author statement /// 16829 // lyase activity // inferred from electronic annotation /// 3824 // catalytic activity // inferred from electronic annotation /// 3878 // ATP citrate synthase activity // inferred from sequence similarity	6085 // acetyl-CoA biosynthesis // inferred from sequence or structural similarity /// 6099 // tricarboxylic acid cycle // inferred from electronic annotation /// 6101 // citrate metabolism // inferred from sequence or structural similarity /// 8152 // metabolism // inferred from electronic annotation /// 6085 // acetyl-CoA biosynthesis // inferred from sequence similarity /// 6101 // citrate met…	5737 // cytoplasm // inferred from sequence or structural similarity /// 5737 // cytoplasm // inferred from sequence similarity	IPR003781 // CoA-binding domain // 2.1E-15 /// IPR005811 // ATP-citrate lyase/succinyl-CoA ligase // 4.7E-47 /// IPR003781 // CoA-binding domain // 4.8E-21 /// IPR005811 // ATP-citrate lyase/succinyl-CoA ligase // 4.7E-47
11734	152933_at	-1.60584	2.84731	-13.8219	6.59e-15	4.14e-13	23.9127	FBgn0037090	CG7529	CG7529	CG7529	40381	4091 // carboxylesterase activity // inferred from sequence or structural similarity /// 3824 // catalytic activity // inferred from electronic annotation /// 4759 // serine esterase activity // inferred from electronic annotation /// 4091 // carboxylesterase activity // inferred from sequence similarity	---	---	IPR002018 // Carboxylesterase, type B // 1.0E-126
4539	145738_at	-0.981445	1.80973	-13.7089	8.23e-15	5.08e-13	23.6882	FBgn0051960 /// FBgn0051958	CG31960 /// CG31958	CG31960 /// CG31958	CG31960 /// CG31958	319047 /// 33603	5509 // calcium ion binding // inferred from sequence or structural similarity /// 5516 // calmodulin binding // inferred from electronic annotation /// 5509 // calcium ion binding // inferred from sequence similarity	6936 // muscle contraction // inferred from electronic annotation /// 19722 // calcium-mediated signaling // inferred from electronic annotation	---	IPR002048 // Calcium-binding EF-hand // 0.0018 /// IPR002048 // Calcium-binding EF-hand // 7.0E-6 /// IPR002048 // Calcium-binding EF-hand // 9.9E-8 /// IPR002048 // Calcium-binding EF-hand // 3.2E-8 /// IPR002048 // Calcium-binding EF-hand // 9.9E-8 /// IPR002048 // Calcium-binding EF-hand // 3.9E-5
5011	146210_at	-1.04079	2.08489	-13.6887	8.57e-15	5.24e-13	23.648	FBgn0032318	CG14072	CG14072	CG14072	34513	---	---	---	---
11314	152513_at	-1.47097	2.67424	-13.6812	8.7e-15	5.29e-13	23.6331	FBgn0039311	CG10513	CG10513	CG10513	43051	16301 // kinase activity // inferred from electronic annotation /// 16740 // transferase activity // inferred from electronic annotation	---	---	IPR004119 // Protein of unknown function DUF227 // 5.7E-122
13063	154262_at	-1.1674	2.76583	-13.6099	1e-14	6e-13	23.4904	FBgn0004507	CG7254	GlyP	Glycogen phosphorylase	33386	4645 // phosphorylase activity // inferred from direct assay /// 8184 // glycogen phosphorylase activity // inferred from mutant phenotype /// 8184 // glycogen phosphorylase activity // inferred from sequence or structural similarity /// 8184 // glycogen phosphorylase activity // non-traceable author statement /// 4645 // phosphorylase activity // inferred from electronic annotation /// 16740 // …	5975 // carbohydrate metabolism // non-traceable author statement /// 5977 // glycogen metabolism // inferred from electronic annotation /// 5977 // glycogen metabolism // inferred from mutant phenotype /// 5975 // carbohydrate metabolism // inferred from electronic annotation	---	IPR000811 // Glycosyl transferase, family 35 // 1.0E-126
1254	142453_at	-1.27857	1.17351	-13.5744	1.07e-14	6.39e-13	23.4193	FBgn0040321	CG5008	GNBP3	Gram-negative bacteria binding protein 3	39020	8329 // pattern recognition receptor activity // inferred from sequence or structural similarity /// 8329 // pattern recognition receptor activity // non-traceable author statement /// 8368 // Gram-negative bacterial binding // non-traceable author statement /// 15926 // glucosidase activity // inferred from electronic annotation /// 8367 // bacterial binding // inferred from sequence or structur…	5976 // polysaccharide metabolism // inferred from electronic annotation /// 6952 // defense response // non-traceable author statement /// 9620 // response to fungi // non-traceable author statement /// 42830 // defense response to pathogenic bacteria // inferred from sequence or structural similarity /// 45088 // regulation of innate immune response // inferred from sequence or structural simil…	5576 // extracellular region // inferred from sequence or structural similarity	IPR000757 // Glycoside hydrolase, family 16 // 5.6E-5
4968	146167_at	-0.947545	1.42026	-13.532	1.17e-14	6.91e-13	23.3341	FBgn0032266	CG18302	CG18302	CG18302	34452	16298 // lipase activity // inferred from electronic annotation /// 16787 // hydrolase activity // inferred from electronic annotation	6629 // lipid metabolism // inferred from electronic annotation	---	IPR006693 // Ab-hydrolase associated lipase region // 4.0E-22
1370	142569_at	-1.02957	3.50436	-13.5293	1.18e-14	6.92e-13	23.3286	FBgn0003423	CG1417	slgA	sluggish A	33117	4657 // proline dehydrogenase activity // inferred from sequence or structural similarity /// 4657 // proline dehydrogenase activity // inferred from electronic annotation /// 16491 // oxidoreductase activity // inferred from electronic annotation /// 4657 // proline dehydrogenase activity // inferred from sequence similarity	6537 // glutamate biosynthesis // inferred from sequence or structural similarity /// 6537 // glutamate biosynthesis // non-traceable author statement /// 6562 // proline catabolism // inferred from sequence or structural similarity /// 6562 // proline catabolism // non-traceable author statement /// 7626 // locomotory behavior // inferred from mutant phenotype /// 6537 // glutamate biosynthesis …	5759 // mitochondrial matrix // inferred from sequence or structural similarity /// 5759 // mitochondrial matrix // non-traceable author statement /// 5739 // mitochondrion // inferred from electronic annotation /// 5759 // mitochondrial matrix // inferred from sequence similarity	IPR002872 // Proline dehydrogenase // 1.0E-126 /// IPR002872 // Proline dehydrogenase // 1.0E-126 /// IPR002872 // Proline dehydrogenase // 1.0E-126
9387	150586_at	-1.62465	3.25108	-13.4567	1.36e-14	7.84e-13	23.1823	FBgn0039324	CG10553	CG10553	CG10553	43064	---	---	---	IPR004119 // Protein of unknown function DUF227 // 1.8E-95
2013	143212_at	-1.36398	2.15415	-13.4438	1.39e-14	7.98e-13	23.1561	FBgn0001491	CG1639	l(1)10Bb	lethal (1) 10Bb	32069	30528 // transcription regulator activity // inferred from electronic annotation /// 3676 // nucleic acid binding // inferred from electronic annotation /// 8270 // zinc ion binding // inferred from electronic annotation /// 46872 // metal ion binding // inferred from electronic annotation	---	5634 // nucleus // inferred from sequence or structural similarity /// 5634 // nucleus // inferred from electronic annotation /// 5634 // nucleus // inferred from sequence similarity	IPR001748 // G10 protein // 5.6E-110 /// IPR007087 // Zn-finger, C2H2 type // 2.2E-6
1667	142866_at	-0.855645	1.61028	-13.4239	1.45e-14	8.27e-13	23.116	FBgn0038665	CG12269	CG12269	CG12269	42271	5515 // protein binding // inferred from physical interaction /// 3735 // structural constituent of ribosome // inferred from electronic annotation /// 3906 // DNA-(apurinic or apyrimidinic site) lyase activity // inferred from electronic annotation /// 16829 // lyase activity // inferred from electronic annotation /// 3735 // structural constituent of ribosome // non-traceable author statement /…	6281 // DNA repair // inferred from electronic annotation /// 6414 // translational elongation // inferred from electronic annotation /// 6974 // response to DNA damage stimulus // inferred from electronic annotation /// 42254 // ribosome biogenesis and assembly // inferred from electronic annotation /// 6412 // protein biosynthesis // non-traceable author statement	5622 // intracellular // inferred from electronic annotation /// 5634 // nucleus // inferred from electronic annotation /// 5840 // ribosome // inferred from electronic annotation /// 30529 // ribonucleoprotein complex // inferred from electronic annotation /// 5830 // cytosolic ribosome (sensu Eukaryota) // non-traceable author statement	---
5535	146734_at	-1.14872	1.21963	-13.4184	1.47e-14	8.32e-13	23.1049	FBgn0033164	CG11112	CG11112	CG11112	35658	---	---	---	---
6128	147327_at	-1.63047	5.09981	-13.407	1.5e-14	8.45e-13	23.0818	FBgn0034152	CG8626	Acp53C14a	Acp53C14a	36872	---	---	---	IPR009392 // Drosophila ACP53EA // 3.2E-11
9689	150888_at	-1.07802	0.900561	-13.4081	1.5e-14	8.45e-13	23.084	FBgn0039769	CG15534	CG15534	CG15534	43613	4767 // sphingomyelin phosphodiesterase activity // inferred from sequence or structural similarity /// 4767 // sphingomyelin phosphodiesterase activity // inferred from electronic annotation /// 16787 // hydrolase activity // inferred from electronic annotation /// 4767 // sphingomyelin phosphodiesterase activity // inferred from sequence similarity	6684 // sphingomyelin metabolism // inferred from sequence or structural similarity /// 6685 // sphingomyelin catabolism // inferred from electronic annotation /// 6684 // sphingomyelin metabolism // inferred from sequence similarity	---	IPR004843 // Metallo-phosphoesterase // 3.9E-16
8700	149899_at	-1.25302	2.82671	-13.2918	1.89e-14	1.05e-12	22.8477	FBgn0038236	CG3360	Cyp313a1	Cyp313a1	41759	3735 // structural constituent of ribosome // inferred from electronic annotation /// 4497 // monooxygenase activity // inferred from electronic annotation /// 16491 // oxidoreductase activity // inferred from electronic annotation	6118 // electron transport // inferred from electronic annotation /// 6412 // protein biosynthesis // inferred from electronic annotation /// 8202 // steroid metabolism // inferred from electronic annotation /// 17143 // insecticide metabolism // non-traceable author statement	5622 // intracellular // inferred from electronic annotation /// 5792 // microsome // non-traceable author statement /// 5840 // ribosome // inferred from electronic annotation /// 16020 // membrane // non-traceable author statement	IPR001128 // Cytochrome P450 // 5.5E-5 /// IPR001128 // Cytochrome P450 // 4.8E-59
1916	143115_at	-0.93747	4.33775	-13.2511	2.06e-14	1.13e-12	22.7647	FBgn0000409	CG17903	Cyt-c-p	Cytochrome c proximal	34996	16491 // oxidoreductase activity // inferred from electronic annotation /// 45155 // electron transporter, transferring electrons from CoQH2-cytochrome c reductase complex and cytochrome c oxidase complex activity // inferred from sequence or structural similarity /// 5515 // protein binding // inferred from physical interaction /// 5506 // iron ion binding // inferred from electronic annotation …	6118 // electron transport // inferred from sequence or structural similarity /// 6118 // electron transport // non-traceable author statement /// 6119 // oxidative phosphorylation // inferred from sequence or structural similarity /// 6118 // electron transport // inferred from direct assay /// 6118 // electron transport // inferred from electronic annotation /// 6810 // transport // inferred fr…	5739 // mitochondrion // inferred from direct assay /// 5743 // mitochondrial inner membrane // inferred from sequence or structural similarity /// 5759 // mitochondrial matrix // inferred from sequence or structural similarity /// 5759 // mitochondrial matrix // non-traceable author statement /// 5739 // mitochondrion // inferred from electronic annotation /// 5746 // mitochondrial electron tran…	IPR003088 // Cytochrome c, class I // 6.0E-34
11618	152817_at	-1.98402	3.8207	-13.1461	2.54e-14	1.39e-12	22.5495	FBgn0033446	CG1648	CG1648	CG1648	36009	5515 // protein binding // inferred from physical interaction	---	---	---
10927	152126_at	-1.51421	5.20321	-13.0578	3.05e-14	1.64e-12	22.3676	FBgn0027571	CG3523	CG3523	CG3523	33524	4024 // alcohol dehydrogenase activity, zinc-dependent // inferred from electronic annotation /// 4312 // fatty-acid synthase activity // inferred from sequence or structural similarity /// 8270 // zinc ion binding // inferred from electronic annotation /// 16788 // hydrolase activity, acting on ester bonds // inferred from electronic annotation /// 48037 // cofactor binding // inferred from elec…	6633 // fatty acid biosynthesis // inferred from electronic annotation /// 8152 // metabolism // inferred from electronic annotation /// 9058 // biosynthesis // inferred from electronic annotation	---	IPR002085 // Zinc-containing alcohol dehydrogenase superfamily // 4.4E-53 /// IPR000794 // Beta-ketoacyl synthase // 1.9E-66 /// IPR001227 // Acyl transferase domain // 7.6E-87 /// IPR001031 // Thioesterase // 3.7E-16 /// IPR000794 // Beta-ketoacyl synthase // 2.0E-82
7366	148565_at	-0.931162	1.11292	-13.0364	3.18e-14	1.71e-12	22.3234	FBgn0036146	CG14141	CG14141	CG14141	39264	---	---	16020 // membrane // inferred from electronic annotation	IPR007110 // Immunoglobulin-like // 5.1E-6
1396	142595_at	-0.805557	0.657384	-13.009	3.37e-14	1.8e-12	22.2667	FBgn0051674	CG31674	CG31674	CG31674	318878	30267 // glyoxylate reductase (NADP) activity // inferred from sequence or structural similarity /// 16616 // oxidoreductase activity, acting on the CH-OH group of donors, NAD or NADP as acceptor // inferred from electronic annotation /// 51287 // NAD binding // inferred from electronic annotation /// 30267 // glyoxylate reductase (NADP) activity // inferred from sequence similarity	5975 // carbohydrate metabolism // inferred from electronic annotation /// 6564 // L-serine biosynthesis // inferred from electronic annotation /// 8152 // metabolism // inferred from electronic annotation	---	IPR006140 // D-isomer specific 2-hydroxyacid dehydrogenase, NAD binding domain // 1.6E-74 /// IPR006139 // D-isomer specific 2-hydroxyacid dehydrogenase, catalytic domain // 1.7E-23
5356	146555_at	-1.26761	2.73881	-12.99	3.5e-14	1.86e-12	22.2274	FBgn0028986	CG9334	Spn3	Serine protease inhibitor 3	49806	4867 // serine-type endopeptidase inhibitor activity // inferred from sequence or structural similarity /// 4867 // serine-type endopeptidase inhibitor activity // non-traceable author statement /// 4867 // serine-type endopeptidase inhibitor activity // inferred from electronic annotation /// 8233 // peptidase activity // inferred from electronic annotation /// 4867 // serine-type endopeptidase …	6508 // proteolysis // inferred from electronic annotation /// 45861 // negative regulation of proteolysis // inferred from sequence or structural similarity /// 45861 // negative regulation of proteolysis // inferred from sequence similarity	---	IPR000215 // Serpin // 1.4E-106
9280	150479_at	-0.950828	1.02546	-12.9469	3.82e-14	2.02e-12	22.1379	FBgn0039145	CG6000	CG6000	CG6000	42851	51082 // unfolded protein binding // inferred from sequence or structural similarity /// 51082 // unfolded protein binding // inferred from sequence similarity	6457 // protein folding // inferred from sequence or structural similarity /// 6457 // protein folding // inferred from sequence similarity	---	IPR001763 // Rhodanese-like // 2.1E-17
10146	151345_at	-0.861764	0.436826	-12.9146	4.09e-14	2.14e-12	22.0708	---	---	---	---	---	---	---	---	---
1447	142646_at	-0.665369	0.954009	-12.8879	4.32e-14	2.26e-12	22.0153	FBgn0036839	CG18136	CG18136	CG18136	40075	---	---	---	IPR002893 // Zn-finger, MYND type // 6.6E-15 /// IPR001214 // Nuclear protein SET // 9.7E-5
13723	154922_at	-0.781508	1.39902	-12.8693	4.49e-14	2.33e-12	21.9765	FBgn0039690	CG1969	CG1969	CG1969	43504	4343 // glucosamine 6-phosphate N-acetyltransferase activity // non-traceable author statement /// 4343 // glucosamine 6-phosphate N-acetyltransferase activity // inferred from electronic annotation /// 8080 // N-acetyltransferase activity // inferred from electronic annotation /// 8415 // acyltransferase activity // inferred from electronic annotation /// 16740 // transferase activity // inferre…	---	---	IPR000182 // GCN5-related N-acetyltransferase // 3.7E-14 /// IPR000182 // GCN5-related N-acetyltransferase // 3.7E-14
4698	145897_at	-1.81098	2.99703	-12.8353	4.81e-14	2.47e-12	21.9055	FBgn0031810	CG9511	CG9511	CG9511	33894	---	---	---	---
5578	146777_at	-1.10658	1.77554	-12.8232	4.94e-14	2.52e-12	21.8801	FBgn0033238	CG11165	CG11165	CG11165	35751	5509 // calcium ion binding // inferred from sequence or structural similarity /// 5516 // calmodulin binding // inferred from electronic annotation /// 5515 // protein binding // inferred from physical interaction /// 5509 // calcium ion binding // inferred from electronic annotation /// 5509 // calcium ion binding // inferred from sequence similarity	6936 // muscle contraction // inferred from electronic annotation /// 19722 // calcium-mediated signaling // inferred from electronic annotation	---	IPR002048 // Calcium-binding EF-hand // 0.0013 /// IPR002048 // Calcium-binding EF-hand // 0.015 /// IPR002048 // Calcium-binding EF-hand // 3.6E-9 /// IPR002048 // Calcium-binding EF-hand // 7.0E-8
991	142190_at	-0.884566	2.03891	-12.7834	5.36e-14	2.7e-12	21.7969	FBgn0033981	CG10247	Cyp6a21	Cyp6a21	36665	4497 // monooxygenase activity // inferred from electronic annotation /// 16491 // oxidoreductase activity // inferred from electronic annotation /// 5506 // iron ion binding // inferred from electronic annotation /// 20037 // heme binding // inferred from electronic annotation /// 46872 // metal ion binding // inferred from electronic annotation	6118 // electron transport // inferred from electronic annotation /// 8202 // steroid metabolism // inferred from electronic annotation	5792 // microsome // non-traceable author statement /// 16020 // membrane // non-traceable author statement /// 16020 // membrane // inferred from electronic annotation	IPR001128 // Cytochrome P450 // 2.5E-120
4054	145253_at	-1.33905	1.93527	-12.7855	5.34e-14	2.7e-12	21.8013	FBgn0030859	CG12990	CG12990	CG12990	32747	16747 // transferase activity, transferring groups other than amino-acyl groups // inferred from electronic annotation	---	---	---
8831	150030_at	-1.62403	1.50163	-12.757	5.66e-14	2.83e-12	21.7414	FBgn0038449	CG17562	CG17562	CG17562	42021	16491 // oxidoreductase activity // inferred from electronic annotation	---	---	IPR004262 // Male sterility protein // 4.0E-117
1781	142980_at	-1.3694	1.08021	-12.7345	5.93e-14	2.96e-12	21.6942	FBgn0029777	CG17763	CG17763	CG17763	31472	---	---	---	---
997	142196_at	-0.976686	2.52045	-12.704	6.32e-14	3.12e-12	21.6301	FBgn0010053	CG15101	Jheh1	Juvenile hormone epoxide hydrolase 1	251984	4301 // epoxide hydrolase activity // inferred from sequence or structural similarity /// 8096 // juvenile hormone epoxide hydrolase activity // inferred from direct assay /// 8096 // juvenile hormone epoxide hydrolase activity // non-traceable author statement /// 5515 // protein binding // inferred from physical interaction /// 3824 // catalytic activity // inferred from electronic annotation /…	6719 // juvenile hormone catabolism // inferred from direct assay /// 6719 // juvenile hormone catabolism // non-traceable author statement /// 6952 // defense response // inferred from electronic annotation /// 9636 // response to toxin // inferred from electronic annotation /// 19439 // aromatic compound catabolism // inferred from electronic annotation	5783 // endoplasmic reticulum // inferred from electronic annotation /// 5792 // microsome // inferred from electronic annotation /// 16020 // membrane // inferred from electronic annotation /// 16021 // integral to membrane // inferred from electronic annotation	IPR010497 // Epoxide hydrolase, N-terminal // 1.2E-68
7935	149134_at	-1.1384	2.55981	-12.6635	6.88e-14	3.37e-12	21.5447	FBgn0037004	CG17637	CG17637	CG17637	40275	15144 // carbohydrate transporter activity // inferred from sequence or structural similarity /// 15520 // tetracycline:hydrogen antiporter activity // inferred from electronic annotation /// 15144 // carbohydrate transporter activity // inferred from sequence similarity	5975 // carbohydrate metabolism // inferred from electronic annotation /// 8643 // carbohydrate transport // inferred from electronic annotation /// 15904 // tetracycline transport // inferred from electronic annotation	16021 // integral to membrane // inferred from electronic annotation	---
13207	154406_at	-1.21012	4.01115	-12.6499	7.08e-14	3.46e-12	21.5161	FBgn0033356	CG8229	CG8229	CG8229	35898	---	---	---	---
10683	151882_at	-1.04785	1.99333	-12.6389	7.24e-14	3.52e-12	21.4928	FBgn0033093	CG3270	CG3270	CG3270	35575	16491 // oxidoreductase activity // inferred from electronic annotation	6118 // electron transport // inferred from electronic annotation /// 8152 // metabolism // inferred from electronic annotation	---	---
8922	150121_at	-1.16521	4.03422	-12.5839	8.13e-14	3.93e-12	21.3764	FBgn0038587	CG7998	CG7998	CG7998	42185	30060 // L-malate dehydrogenase activity // inferred from sequence or structural similarity /// 4459 // L-lactate dehydrogenase activity // inferred from electronic annotation /// 16491 // oxidoreductase activity // inferred from electronic annotation /// 30060 // L-malate dehydrogenase activity // inferred from electronic annotation /// 30060 // L-malate dehydrogenase activity // inferred from s…	6099 // tricarboxylic acid cycle // inferred from sequence or structural similarity /// 6100 // tricarboxylic acid cycle intermediate metabolism // inferred from electronic annotation /// 6108 // malate metabolism // inferred from electronic annotation /// 6096 // glycolysis // inferred from electronic annotation /// 6099 // tricarboxylic acid cycle // inferred from sequence similarity	5759 // mitochondrial matrix // inferred from sequence or structural similarity /// 5759 // mitochondrial matrix // inferred from sequence similarity	IPR001236 // Lactate/malate dehydrogenase // 2.7E-69 /// IPR001236 // Lactate/malate dehydrogenase // 6.0E-63
2628	143827_at	-1.31694	2.10335	-12.5795	8.2e-14	3.95e-12	21.3671	FBgn0015586	CG3801	Acp76A	Accessory gland-specific peptide 76A	40078	4867 // serine-type endopeptidase inhibitor activity // inferred from sequence or structural similarity /// 42562 // hormone binding // inferred from sequence or structural similarity /// 4867 // serine-type endopeptidase inhibitor activity // inferred from electronic annotation /// 4867 // serine-type endopeptidase inhibitor activity // inferred from sequence similarity /// 42562 // hormone bind…	45861 // negative regulation of proteolysis // inferred from sequence or structural similarity /// 45861 // negative regulation of proteolysis // inferred from sequence similarity	---	---
7024	148223_at	-1.03112	2.26794	-12.5531	8.67e-14	4.15e-12	21.3111	FBgn0035608	CG10630	CG10630	CG10630	38620	3725 // double-stranded RNA binding // inferred from electronic annotation	---	5622 // intracellular // inferred from electronic annotation	IPR001159 // Double-stranded RNA binding (DsRBD) domain // 3.3E-4
9114	150313_at	-0.783629	0.459025	-12.522	9.26e-14	4.41e-12	21.2451	FBgn0038887	CG7907	CG7907	CG7907	42539	339 // RNA cap binding // inferred from sequence or structural similarity /// 3723 // RNA binding // inferred from electronic annotation /// 339 // RNA cap binding // inferred from sequence similarity	398 // nuclear mRNA splicing, via spliceosome // inferred from sequence or structural similarity /// 6412 // protein biosynthesis // inferred from electronic annotation /// 398 // nuclear mRNA splicing, via spliceosome // inferred from sequence similarity	5634 // nucleus // inferred from sequence or structural similarity /// 5681 // spliceosome complex // inferred from electronic annotation /// 5845 // mRNA cap complex // inferred from sequence or structural similarity /// 5634 // nucleus // inferred from sequence similarity /// 5845 // mRNA cap complex // inferred from sequence similarity	IPR003890 // Initiation factor eIF-4 gamma, middle // 7.5E-41
3630	144829_at	-0.908796	2.61325	-12.5123	9.45e-14	4.46e-12	21.2244	FBgn0030237	CG15209	CG15209	CG15209	32011	5515 // protein binding // inferred from physical interaction	---	---	---
4697	145896_at	-0.951135	1.4362	-12.5128	9.44e-14	4.46e-12	21.2254	FBgn0031809	---	CG9508	CG9508	33893	4245 // neprilysin activity // inferred from sequence or structural similarity /// 8270 // zinc ion binding // inferred from electronic annotation /// 4245 // neprilysin activity // inferred from sequence similarity	6508 // proteolysis // inferred from electronic annotation /// 7155 // cell adhesion // inferred from electronic annotation	16020 // membrane // inferred from electronic annotation	IPR000718 // Peptidase M13, neprilysin // 8.6E-8 /// IPR007110 // Immunoglobulin-like // 6.7E-5 /// IPR007110 // Immunoglobulin-like // 7.1E-8
7957	149156_at	-1.07664	2.17388	-12.5142	9.41e-14	4.46e-12	21.2285	FBgn0037038	CG11037	CG11037	CG11037	40317	4252 // serine-type endopeptidase activity // inferred from sequence or structural similarity /// 4263 // chymotrypsin activity // inferred from electronic annotation /// 4295 // trypsin activity // non-traceable author statement /// 4252 // serine-type endopeptidase activity // inferred from electronic annotation /// 4252 // serine-type endopeptidase activity // inferred from sequence similarity	6508 // proteolysis // non-traceable author statement /// 6508 // proteolysis // inferred from electronic annotation	---	IPR001254 // Peptidase S1, chymotrypsin // 6.4E-55
4975	146174_s_at	-1.74997	3.97832	-12.4888	9.93e-14	4.65e-12	21.1744	FBgn0043825 /// FBgn0051872	CG31872 /// CG18284	CG18284 /// CG31872	CG18284 /// CG31872	34458 /// 34460	4806 // triacylglycerol lipase activity // inferred from sequence or structural similarity /// 16298 // lipase activity // inferred from electronic annotation /// 16298 // lipase activity // inferred from sequence or structural similarity /// 16787 // hydrolase activity // inferred from electronic annotation /// 3824 // catalytic activity // inferred from electronic annotation /// 16789 // carbox…	6629 // lipid metabolism // inferred from electronic annotation /// 6629 // lipid metabolism // inferred from sequence or structural similarity /// 16042 // lipid catabolism // inferred from electronic annotation /// 6629 // lipid metabolism // inferred from sequence similarity	---	IPR006693 // Ab-hydrolase associated lipase region // 1.3E-24 /// IPR006693 // Ab-hydrolase associated lipase region // 1.3E-23
6997	148196_at	-1.1952	1.29374	-12.4902	9.9e-14	4.65e-12	21.1774	FBgn0035571	CG12493	CG12493	CG12493	38575	3725 // double-stranded RNA binding // inferred from sequence or structural similarity /// 3725 // double-stranded RNA binding // inferred from electronic annotation /// 3725 // double-stranded RNA binding // inferred from sequence similarity	---	5622 // intracellular // inferred from electronic annotation	IPR001159 // Double-stranded RNA binding (DsRBD) domain // 1.5E-6
5538	146737_at	-1.1184	2.23364	-12.4864	9.98e-14	4.66e-12	21.1692	FBgn0033167	CG1701	CG1701	CG1701	35661	---	---	---	---
116	141315_at	-1.72522	4.29463	-12.4769	1.02e-13	4.72e-12	21.1491	FBgn0040732	CG16926	CG16926	CG16926	50205	5515 // protein binding // inferred from physical interaction	---	---	---
10698	151897_at	-1.6789	2.42185	-12.4766	1.02e-13	4.72e-12	21.1485	FBgn0046114	CG4919	Gclm	Glutamate-cysteine ligase modifier subunit	248194	4357 // glutamate-cysteine ligase activity // Unknown /// 19899 // enzyme binding // inferred from physical interaction /// 30234 // enzyme regulator activity // inferred from sequence or structural similarity /// 35226 // glutamate-cysteine ligase catalytic subunit binding // inferred from physical interaction /// 4357 // glutamate-cysteine ligase activity // inferred from curator /// 30234 // e…	6750 // glutathione biosynthesis // inferred from direct assay /// 6750 // glutathione biosynthesis // inferred from mutant phenotype /// 6750 // glutathione biosynthesis // inferred from sequence or structural similarity /// 7611 // learning and/or memory // inferred from mutant phenotype /// 8355 // olfactory learning // inferred from mutant phenotype /// 35227 // regulation of glutamate-cystei…	17109 // glutamate-cysteine ligase complex // inferred from physical interaction /// 17109 // glutamate-cysteine ligase complex // inferred from sequence or structural similarity /// 17109 // glutamate-cysteine ligase complex // inferred from sequence similarity	---
5018	146217_at	-0.960484	1.11728	-12.428	1.13e-13	5.2e-12	21.0447	FBgn0040096	CG16834	lectin-33A	lectin-33A	53516	5534 // galactose binding // inferred from sequence or structural similarity /// 5529 // sugar binding // inferred from electronic annotation /// 5534 // galactose binding // inferred from sequence similarity	---	---	IPR001304 // C-type lectin // 1.0E-4
11708	152907_at	-1.47184	2.26628	-12.4249	1.14e-13	5.22e-12	21.0381	FBgn0004364	CG8896	18w	18 wheeler	37277	4888 // transmembrane receptor activity // inferred from sequence or structural similarity /// 4888 // transmembrane receptor activity // inferred from electronic annotation /// 4888 // transmembrane receptor activity // inferred from sequence similarity	6952 // defense response // traceable author statement /// 6955 // immune response // inferred from expression pattern /// 6961 // antibacterial humoral response (sensu Protostomia) // inferred from mutant phenotype /// 6961 // antibacterial humoral response (sensu Protostomia) // non-traceable author statement /// 6961 // antibacterial humoral response (sensu Protostomia) // traceable author sta…	5624 // membrane fraction // inferred from direct assay /// 5737 // cytoplasm // inferred from direct assay /// 5886 // plasma membrane // inferred from direct assay /// 5886 // plasma membrane // inferred from sequence or structural similarity /// 16021 // integral to membrane // inferred from sequence or structural similarity /// 16020 // membrane // inferred from electronic annotation /// 5886…	IPR001611 // Leucine-rich repeat // 0.14 /// IPR001611 // Leucine-rich repeat // 0.1 /// IPR001611 // Leucine-rich repeat // 0.091 /// IPR001611 // Leucine-rich repeat // 2.0E-4 /// IPR001611 // Leucine-rich repeat // 3.3E-5 /// IPR001611 // Leucine-rich repeat // 0.023 /// IPR001611 // Leucine-rich repeat // 0.0037 /// IPR001611 // Leucine-rich repeat // 0.019 /// IPR001611 // Leucine-rich repea…
11800	152999_at	-1.1881	1.87521	-12.3688	1.28e-13	5.8e-12	20.918	FBgn0031305	CG4715	Iris	Iris	33290	---	9993 // oogenesis (sensu Insecta) // non-traceable author statement	---	---
2265	143464_f_at	-2.63775	3.86708	-12.3577	1.31e-13	5.92e-12	20.8941	FBgn0004425	CG1179	LysB	Lysozyme B	38125	3796 // lysozyme activity // inferred from sequence or structural similarity /// 3796 // lysozyme activity // non-traceable author statement /// 3796 // lysozyme activity // inferred from sequence similarity	6960 // antimicrobial humoral response (sensu Protostomia) // non-traceable author statement /// 16998 // cell wall catabolism // inferred from electronic annotation	5576 // extracellular region // inferred from electronic annotation	IPR001916 // Glycoside hydrolase, family 22 // 1.3E-67
8968	150167_at	-1.08306	1.68898	-12.3284	1.39e-13	6.28e-12	20.8311	---	---	---	---	---	---	---	---	---
8643	149842_at	-0.901482	1.48781	-12.3082	1.46e-13	6.49e-12	20.7877	FBgn0041711	CG9792	yellow-e	yellow-e	41653	---	---	---	IPR003534 // Major royal jelly protein // 5.3E-126
1172	142371_at	-1.37653	1.59098	-12.2736	1.57e-13	6.97e-12	20.7134	FBgn0016684	CG10207	NaPi-T	Na<up>+</up>-dependent inorganic phosphate cotransporter	36651	5316 // high affinity inorganic phosphate:sodium symporter activity // inferred from sequence or structural similarity /// 5316 // high affinity inorganic phosphate:sodium symporter activity // non-traceable author statement /// 15114 // phosphate transporter activity // inferred from electronic annotation /// 5515 // protein binding // inferred from physical interaction /// 5215 // transporter a…	6796 // phosphate metabolism // inferred from electronic annotation /// 6812 // cation transport // inferred from electronic annotation /// 6817 // phosphate transport // inferred from electronic annotation /// 6858 // extracellular transport // inferred from electronic annotation /// 6810 // transport // inferred from electronic annotation /// 6814 // sodium ion transport // inferred from electr…	16021 // integral to membrane // inferred from electronic annotation /// 16020 // membrane // inferred from electronic annotation	---
8612	149811_at	-0.700202	1.17641	-12.2662	1.59e-13	7.04e-12	20.6973	FBgn0038102	CG14383	CG14383	CG14383	41593	5515 // protein binding // inferred from physical interaction	---	---	---
9638	150837_at	-2.46971	1.20653	-12.2531	1.64e-13	7.21e-12	20.6691	FBgn0039685	CG7592	Obp99b	Odorant-binding protein 99b	43497	5549 // odorant binding // inferred from electronic annotation /// 5549 // odorant binding // inferred from sequence or structural similarity /// 5549 // odorant binding // non-traceable author statement /// 5549 // odorant binding // inferred from sequence similarity	6810 // transport // inferred from electronic annotation /// 7606 // sensory perception of chemical stimulus // inferred from sequence or structural similarity /// 19236 // response to pheromone // inferred from sequence or structural similarity /// 35071 // salivary gland cell autophagic cell death // inferred from expression pattern /// 42048 // olfactory behavior // inferred from sequence or s…	5576 // extracellular region // inferred from sequence or structural similarity /// 5576 // extracellular region // inferred from sequence similarity	IPR006170 // Pheromone/general odorant binding protein, PBP/GOBP // 5.8E-31
5332	146531_at	-0.889392	0.933845	-12.1991	1.84e-13	8.04e-12	20.5523	FBgn0032843	CG10730	CG10730	CG10730	35291	---	---	---	IPR004245 // Protein of unknown function DUF229 // 1.0E-126
6436	147635_at	-1.2257	2.41511	-12.1806	1.91e-13	8.32e-12	20.5124	FBgn0034659	CG4021	CG4021	CG4021	37484	3676 // nucleic acid binding // inferred from electronic annotation /// 3729 // mRNA binding // inferred from electronic annotation	6139 // nucleobase, nucleoside, nucleotide and nucleic acid metabolism // inferred from electronic annotation /// 6915 // apoptosis // inferred from electronic annotation /// 7275 // development // inferred from electronic annotation /// 7276 // gametogenesis // inferred from electronic annotation /// 7283 // spermatogenesis // inferred from electronic annotation /// 8283 // cell proliferation //…	---	---
10456	151655_at	-0.966237	3.02027	-12.1691	1.96e-13	8.47e-12	20.4873	FBgn0034087	CG8443	CG8443	CG8443	36793	3743 // translation initiation factor activity // inferred from sequence or structural similarity /// 5488 // binding // inferred from electronic annotation /// 3743 // translation initiation factor activity // inferred from sequence similarity	6413 // translational initiation // inferred from sequence or structural similarity /// 6445 // regulation of translation // inferred from electronic annotation /// 6413 // translational initiation // inferred from sequence similarity	5852 // eukaryotic translation initiation factor 3 complex // inferred from sequence or structural similarity /// 5852 // eukaryotic translation initiation factor 3 complex // inferred from sequence similarity	---
10757	151956_at	-0.842157	1.2036	-12.1701	1.96e-13	8.47e-12	20.4895	FBgn0033423	CG1809	CG1809	CG1809	35981	4035 // alkaline phosphatase activity // inferred from sequence or structural similarity /// 19204 // nucleotide phosphatase activity // inferred from electronic annotation /// 287 // magnesium ion binding // inferred from electronic annotation /// 8270 // zinc ion binding // inferred from electronic annotation /// 16787 // hydrolase activity // inferred from electronic annotation /// 4035 // alk…	1501 // skeletal development // inferred from electronic annotation /// 7498 // mesoderm development // inferred from electronic annotation /// 8152 // metabolism // inferred from electronic annotation	---	IPR001952 // Alkaline phosphatase // 8.2E-96
6127	147326_at	-0.70777	0.748117	-12.1676	1.97e-13	8.47e-12	20.4841	FBgn0034151	CG15617	CG15617	CG15617	36871	5515 // protein binding // inferred from electronic annotation	---	---	IPR001478 // PDZ/DHR/GLGF domain // 6.1E-6
9374	150573_at	-1.13227	1.50108	-12.1563	2.01e-13	8.65e-12	20.4596	---	CG11889 /// CG11891	---	---	---	16301 // kinase activity // inferred from electronic annotation /// 16740 // transferase activity // inferred from electronic annotation	---	---	---
951	142150_at	-0.839368	0.265815	-12.131	2.13e-13	9.08e-12	20.4047	FBgn0003380	CG12348	Sh	Shaker	32780	5249 // voltage-gated potassium channel activity // inferred from sequence or structural similarity /// 5249 // voltage-gated potassium channel activity // non-traceable author statement /// 5249 // voltage-gated potassium channel activity // traceable author statement /// 5515 // protein binding // inferred from electronic annotation /// 5216 // ion channel activity // inferred from electronic a…	6813 // potassium ion transport // non-traceable author statement /// 6813 // potassium ion transport // traceable author statement /// 7611 // learning and/or memory // non-traceable author statement /// 7619 // courtship behavior // non-traceable author statement /// 7619 // courtship behavior // traceable author statement /// 7629 // flight behavior // inferred from mutant phenotype /// 30431 …	8076 // voltage-gated potassium channel complex // non-traceable author statement /// 8076 // voltage-gated potassium channel complex // traceable author statement /// 16021 // integral to membrane // non-traceable author statement /// 8076 // voltage-gated potassium channel complex // inferred from electronic annotation /// 16020 // membrane // inferred from electronic annotation /// 16021 // in…	IPR005821 // Ion transport protein // 2.2E-53 /// IPR003131 // K+ channel tetramerisation // 5.6E-50 /// IPR005821 // Ion transport protein // 2.2E-53 /// IPR003131 // K+ channel tetramerisation // 5.6E-50
8992	150191_at	-1.1402	1.62933	-12.1207	2.17e-13	9.26e-12	20.3822	FBgn0038700	CG3734	CG3734	CG3734	42318	8236 // serine-type peptidase activity // inferred from sequence or structural similarity /// 3824 // catalytic activity // inferred from electronic annotation /// 8233 // peptidase activity // inferred from electronic annotation /// 8236 // serine-type peptidase activity // inferred from electronic annotation /// 8236 // serine-type peptidase activity // inferred from sequence similarity	6508 // proteolysis // inferred from electronic annotation	5764 // lysosome // inferred from electronic annotation	IPR008758 // Peptidase S28 // 1.0E-126
6549	147748_at	-0.874988	1.66244	-12.1033	2.26e-13	9.58e-12	20.3444	FBgn0034827	CG12192	Klp59D	Klp59D	37674	3774 // motor activity // inferred from sequence or structural similarity /// 3777 // microtubule motor activity // inferred from electronic annotation /// 3777 // microtubule motor activity // inferred from sequence or structural similarity /// 5200 // structural constituent of cytoskeleton // inferred from electronic annotation /// 5524 // ATP binding // inferred from electronic annotation /// …	6605 // protein targeting // inferred from electronic annotation /// 6886 // intracellular protein transport // inferred from electronic annotation /// 7018 // microtubule-based movement // inferred from sequence or structural similarity /// 7018 // microtubule-based movement // inferred from electronic annotation /// 7018 // microtubule-based movement // inferred from sequence similarity	5871 // kinesin complex // inferred from sequence or structural similarity /// 5875 // microtubule associated complex // inferred from electronic annotation /// 5871 // kinesin complex // inferred from sequence similarity	IPR001752 // Kinesin, motor region // 1.0E-126
8502	149701_at	-0.929975	2.19324	-12.0963	2.29e-13	9.67e-12	20.3292	FBgn0037936	CG6908	CG6908	CG6908	41410	16301 // kinase activity // inferred from electronic annotation /// 16740 // transferase activity // inferred from electronic annotation	---	---	IPR004119 // Protein of unknown function DUF227 // 8.4E-110
4879	146078_at	-0.937158	3.5923	-12.0942	2.3e-13	9.68e-12	20.3247	FBgn0028433	CG3694	G30A	G protein 30A	45234	3924 // GTPase activity // inferred from physical interaction /// 3924 // GTPase activity // inferred from sequence or structural similarity /// 3924 // GTPase activity // non-traceable author statement /// 4871 // signal transducer activity // inferred from electronic annotation /// 3924 // GTPase activity // inferred from sequence similarity	7186 // G-protein coupled receptor protein signaling pathway // non-traceable author statement /// 7602 // phototransduction // inferred from physical interaction /// 7165 // signal transduction // inferred from electronic annotation /// 7186 // G-protein coupled receptor protein signaling pathway // inferred from electronic annotation /// 7601 // visual perception // inferred from electronic ann…	5737 // cytoplasm // inferred from direct assay /// 5834 // heterotrimeric G-protein complex // inferred from physical interaction /// 5834 // heterotrimeric G-protein complex // non-traceable author statement /// 16028 // rhabdomere // inferred from direct assay /// 5834 // heterotrimeric G-protein complex // inferred from electronic annotation /// 16020 // membrane // inferred from electronic a…	IPR001770 // G-protein, gamma subunit // 2.3E-13
9378	150577_at	-1.38593	2.426	-12.0504	2.53e-13	1.06e-11	20.2291	FBgn0051104	CG31104	CG31104	CG31104	43054	16301 // kinase activity // inferred from electronic annotation /// 16740 // transferase activity // inferred from electronic annotation	---	---	IPR004119 // Protein of unknown function DUF227 // 7.8E-101
4862	146061_at	-1.65902	1.23795	-12.0433	2.57e-13	1.07e-11	20.2136	FBgn0032088	CG13102	CG13102	CG13102	34228	---	---	---	---
12583	153782_at	-1.30094	5.32773	-12.0404	2.58e-13	1.08e-11	20.2074	FBgn0035978	CG4347	UGP	UGP	39065	3983 // UTP:glucose-1-phosphate uridylyltransferase activity // inferred from sequence or structural similarity /// 42802 // identical protein binding // inferred from physical interaction /// 16779 // nucleotidyltransferase activity // inferred from electronic annotation /// 3983 // UTP:glucose-1-phosphate uridylyltransferase activity // inferred from sequence similarity	5976 // polysaccharide metabolism // inferred from electronic annotation /// 8152 // metabolism // inferred from electronic annotation	---	IPR002618 // UTP--glucose-1-phosphate uridylyltransferase // 1.0E-126 /// IPR002618 // UTP--glucose-1-phosphate uridylyltransferase // 1.0E-126
11764	152963_at	-1.28277	2.14812	-12.0361	2.61e-13	1.08e-11	20.1979	FBgn0017561	CG1615	Ork1	Open rectifier K<up>+</up> channel 1	32020	5242 // inward rectifier potassium channel activity // non-traceable author statement /// 5267 // potassium channel activity // non-traceable author statement /// 15271 // outward rectifier potassium channel activity // non-traceable author statement /// 5515 // protein binding // inferred from physical interaction /// 5267 // potassium channel activity // inferred from electronic annotation /// …	6813 // potassium ion transport // non-traceable author statement /// 19226 // transmission of nerve impulse // inferred from electronic annotation /// 6813 // potassium ion transport // inferred from electronic annotation /// 6810 // transport // inferred from electronic annotation /// 6811 // ion transport // inferred from electronic annotation	5886 // plasma membrane // inferred from sequence or structural similarity /// 5886 // plasma membrane // non-traceable author statement /// 16020 // membrane // inferred from electronic annotation /// 16021 // integral to membrane // inferred from electronic annotation /// 5886 // plasma membrane // inferred from sequence similarity	---
277	141476_at	-0.677971	1.59954	-12.0184	2.71e-13	1.12e-11	20.1592	FBgn0033905	CG18324	CG18324	CG18324	36568	5386 // carrier activity // inferred from sequence or structural similarity /// 5488 // binding // inferred from electronic annotation /// 5215 // transporter activity // inferred from electronic annotation /// 5386 // carrier activity // inferred from sequence similarity	6810 // transport // inferred from electronic annotation	5740 // mitochondrial envelope // inferred from sequence or structural similarity /// 5743 // mitochondrial inner membrane // inferred from electronic annotation /// 16020 // membrane // inferred from electronic annotation /// 16021 // integral to membrane // inferred from electronic annotation /// 5740 // mitochondrial envelope // inferred from sequence similarity	IPR001993 // Mitochondrial substrate carrier // 1.1E-15 /// IPR001993 // Mitochondrial substrate carrier // 2.9E-13 /// IPR001993 // Mitochondrial substrate carrier // 1.5E-26 /// IPR001993 // Mitochondrial substrate carrier // 2.7E-10 /// IPR001993 // Mitochondrial substrate carrier // 1.5E-26
4976	146175_at	-1.63715	3.82536	-12.0158	2.73e-13	1.12e-11	20.1535	FBgn0032275	CG17097	CG17097	CG17097	34461	4806 // triacylglycerol lipase activity // inferred from sequence or structural similarity /// 16298 // lipase activity // inferred from sequence or structural similarity /// 3824 // catalytic activity // inferred from electronic annotation /// 16787 // hydrolase activity // inferred from electronic annotation /// 16789 // carboxylic ester hydrolase activity // inferred from electronic annotation…	6629 // lipid metabolism // inferred from electronic annotation /// 6629 // lipid metabolism // inferred from sequence or structural similarity /// 16042 // lipid catabolism // inferred from electronic annotation /// 6629 // lipid metabolism // inferred from sequence similarity	---	IPR006693 // Ab-hydrolase associated lipase region // 7.9E-24 /// IPR006693 // Ab-hydrolase associated lipase region // 7.9E-24
3112	144311_at	-1.10195	1.83424	-12.0123	2.75e-13	1.13e-11	20.1459	FBgn0041713	CG4182	yellow-c	yellow-c	34879	5515 // protein binding // inferred from physical interaction	---	---	IPR003534 // Major royal jelly protein // 1.0E-126
6345	147544_at	-1.05824	4.01551	-11.9873	2.9e-13	1.17e-11	20.0913	FBgn0034509	CG13421	Obp57c	Odorant-binding protein 57c	37311	5549 // odorant binding // inferred from electronic annotation /// 5549 // odorant binding // inferred from sequence or structural similarity /// 5549 // odorant binding // non-traceable author statement /// 5549 // odorant binding // inferred from sequence similarity	6810 // transport // inferred from electronic annotation /// 7606 // sensory perception of chemical stimulus // inferred from sequence or structural similarity /// 7608 // sensory perception of smell // inferred from electronic annotation /// 50896 // response to stimulus // inferred from electronic annotation /// 6810 // transport // non-traceable author statement /// 7606 // sensory perception …	---	IPR006170 // Pheromone/general odorant binding protein, PBP/GOBP // 1.4E-25
11316	152515_at	-1.22983	4.85957	-11.9866	2.9e-13	1.17e-11	20.0896	FBgn0003074	CG8251	Pgi	Phosphoglucose isomerase	35886	4347 // glucose-6-phosphate isomerase activity // non-traceable author statement /// 4616 // phosphogluconate dehydrogenase (decarboxylating) activity // inferred from sequence or structural similarity /// 4616 // phosphogluconate dehydrogenase (decarboxylating) activity // traceable author statement /// 4347 // glucose-6-phosphate isomerase activity // inferred from electronic annotation /// 168…	6094 // gluconeogenesis // non-traceable author statement /// 6096 // glycolysis // non-traceable author statement /// 6094 // gluconeogenesis // inferred from electronic annotation /// 6096 // glycolysis // inferred from electronic annotation	5737 // cytoplasm // non-traceable author statement	IPR001672 // Phosphoglucose isomerase (PGI) // 1.0E-126
11637	152836_at	-1.31992	2.25021	-11.9511	3.14e-13	1.26e-11	20.0118	FBgn0025595	CG11325	GRHR	Gonadotropin-releasing hormone receptor	33942	1653 // peptide receptor activity // inferred from direct assay /// 4930 // G-protein coupled receptor activity // inferred from sequence or structural similarity /// 4968 // gonadotropin-releasing hormone receptor activity // inferred from sequence or structural similarity /// 8188 // neuropeptide receptor activity // inferred from sequence or structural similarity /// 8188 // neuropeptide recep…	7186 // G-protein coupled receptor protein signaling pathway // inferred from sequence or structural similarity /// 7186 // G-protein coupled receptor protein signaling pathway // non-traceable author statement /// 7292 // female gamete generation // inferred from electronic annotation /// 19226 // transmission of nerve impulse // inferred from electronic annotation /// 19722 // calcium-mediated …	5887 // integral to plasma membrane // inferred from sequence or structural similarity /// 16021 // integral to membrane // inferred from sequence or structural similarity /// 16021 // integral to membrane // inferred from electronic annotation /// 16020 // membrane // inferred from electronic annotation /// 5887 // integral to plasma membrane // inferred from sequence similarity /// 16021 // int…	IPR000276 // Rhodopsin-like GPCR superfamily // 1.1E-57
5886	147085_at	-1.41007	0.0874899	-11.9391	3.22e-13	1.29e-11	19.9854	FBgn0050042	CG30042	CG30042	CG30042	36345	---	---	---	IPR000618 // Insect cuticle protein // 1.5E-26
8568	149767_at	-2.1566	3.91474	-11.8994	3.51e-13	1.39e-11	19.8981	---	CG10096 /// CG10097	---	---	---	---	---	---	---
932	142131_at	-0.767169	1.39308	-11.8737	3.71e-13	1.46e-11	19.8416	FBgn0034715	CG3382	Oatp58Db	Organic anion transporting polypeptide 58Db	37544	8514 // organic anion transporter activity // inferred from sequence or structural similarity /// 8514 // organic anion transporter activity // inferred from sequence similarity	6364 // rRNA processing // inferred from electronic annotation /// 6820 // anion transport // inferred from electronic annotation /// 15711 // organic anion transport // inferred from sequence or structural similarity /// 15711 // organic anion transport // inferred from sequence similarity	16020 // membrane // inferred from electronic annotation	IPR004157 // Organic anion transporter polypeptide (OATP), C-terminal // 1.0E-126
5989	147188_at	-0.596448	0.334093	-11.8567	3.85e-13	1.51e-11	19.8042	FBgn0033904	CG18327	CG18327	CG18327	36567	5386 // carrier activity // inferred from sequence or structural similarity /// 5488 // binding // inferred from electronic annotation /// 5215 // transporter activity // inferred from electronic annotation /// 5386 // carrier activity // inferred from sequence similarity	6810 // transport // inferred from electronic annotation	5740 // mitochondrial envelope // inferred from sequence or structural similarity /// 5743 // mitochondrial inner membrane // inferred from electronic annotation /// 16020 // membrane // inferred from electronic annotation /// 16021 // integral to membrane // inferred from electronic annotation /// 5740 // mitochondrial envelope // inferred from sequence similarity	IPR001993 // Mitochondrial substrate carrier // 4.1E-18 /// IPR001993 // Mitochondrial substrate carrier // 7.4E-23 /// IPR001993 // Mitochondrial substrate carrier // 5.7E-25
11353	152552_at	-0.745406	3.31811	-11.81	4.27e-13	1.66e-11	19.701	FBgn0053970	---	CG33970	CG33970	43186	166 // nucleotide binding // inferred from electronic annotation /// 5215 // transporter activity // inferred from sequence or structural similarity /// 5524 // ATP binding // inferred from electronic annotation /// 42626 // ATPase activity, coupled to transmembrane movement of substances // inferred from sequence or structural similarity /// 16887 // ATPase activity // inferred from electronic a…	6810 // transport // inferred from sequence or structural similarity /// 6810 // transport // inferred from electronic annotation /// 6810 // transport // inferred from sequence similarity	16020 // membrane // inferred from electronic annotation /// 43190 // ATP-binding cassette (ABC) transporter complex // inferred from sequence or structural similarity /// 43190 // ATP-binding cassette (ABC) transporter complex // inferred from sequence similarity	---
191	141390_at	-1.42269	3.61418	-11.8016	4.34e-13	1.68e-11	19.6825	FBgn0010609	CG8732	l(2)44DEa	lethal (2) 44DEa	46068	3987 // acetate-CoA ligase activity // inferred from sequence or structural similarity /// 3824 // catalytic activity // inferred from electronic annotation /// 8121 // ubiquinol-cytochrome-c reductase activity // inferred from electronic annotation /// 3987 // acetate-CoA ligase activity // inferred from sequence similarity	6631 // fatty acid metabolism // inferred from electronic annotation /// 8152 // metabolism // inferred from electronic annotation /// 6122 // mitochondrial electron transport, ubiquinol to cytochrome c // inferred from electronic annotation	---	IPR000873 // AMP-dependent synthetase and ligase // 1.3E-87 /// IPR000873 // AMP-dependent synthetase and ligase // 1.3E-87 /// IPR000873 // AMP-dependent synthetase and ligase // 1.3E-87
3865	145064_at	-0.799569	0.0981894	-11.7427	4.94e-13	1.9e-11	19.5519	FBgn0052598 /// FBgn0052601	CG32598 /// CG32601	CG32598 /// CG32601	CG32598 /// CG32601	318107 /// 326224	3700 // transcription factor activity // inferred from sequence or structural similarity /// 3700 // transcription factor activity // inferred from sequence similarity	6355 // regulation of transcription, DNA-dependent // inferred from sequence or structural similarity /// 6355 // regulation of transcription, DNA-dependent // inferred from sequence similarity	5634 // nucleus // inferred from sequence or structural similarity /// 5727 // extrachromosomal circular DNA // inferred from electronic annotation /// 5634 // nucleus // inferred from sequence similarity	---
10297	151496_s_at	-1.44219	3.95175	-11.7131	5.27e-13	2.02e-11	19.4862	FBgn0027578	CG14526	CG14526	CG14526	43413	4245 // neprilysin activity // inferred from electronic annotation /// 8270 // zinc ion binding // inferred from electronic annotation /// 16511 // endothelin-converting enzyme activity // inferred from sequence or structural similarity /// 8233 // peptidase activity // inferred from electronic annotation /// 8237 // metallopeptidase activity // inferred from electronic annotation /// 16787 // hy…	6508 // proteolysis // inferred from electronic annotation /// 7165 // signal transduction // inferred from electronic annotation	16020 // membrane // inferred from electronic annotation	IPR008753 // Peptidase M13 // 9.3E-10 /// IPR000718 // Peptidase M13, neprilysin // 2.0E-46
6129	147328_at	-1.59961	3.74396	-11.6896	5.55e-13	2.11e-11	19.4339	FBgn0034153	CG15616	Acp53C14b	Acp53C14b	36873	---	---	---	---
6321	147520_at	-1.45048	4.51921	-11.6697	5.8e-13	2.19e-11	19.3896	FBgn0034474	CG13873	Obp56g	Odorant-binding protein 56g	37270	5549 // odorant binding // inferred from sequence or structural similarity /// 5549 // odorant binding // non-traceable author statement /// 5549 // odorant binding // inferred from electronic annotation /// 5549 // odorant binding // inferred from sequence similarity	6810 // transport // inferred from electronic annotation /// 7606 // sensory perception of chemical stimulus // inferred from sequence or structural similarity /// 7606 // sensory perception of chemical stimulus // inferred from sequence similarity	---	IPR006170 // Pheromone/general odorant binding protein, PBP/GOBP // 3.9E-25 /// IPR006170 // Pheromone/general odorant binding protein, PBP/GOBP // 1.6E-23
11320	152519_at	-0.796866	2.44705	-11.6701	5.8e-13	2.19e-11	19.3904	FBgn0033764	CG8776	CG8776	CG8776	36395	8805 // carbon-monoxide oxygenase activity // inferred from sequence or structural similarity /// 5515 // protein binding // inferred from physical interaction /// 4359 // glutaminase activity // inferred from electronic annotation /// 5509 // calcium ion binding // inferred from electronic annotation /// 3824 // catalytic activity // inferred from electronic annotation /// 51287 // NAD binding /…	6118 // electron transport // inferred from electronic annotation /// 7613 // memory // inferred from mutant phenotype /// 7626 // locomotory behavior // inferred from mutant phenotype /// 6541 // glutamine metabolism // inferred from electronic annotation /// 9225 // nucleotide-sugar metabolism // inferred from electronic annotation	16021 // integral to membrane // inferred from electronic annotation /// 30133 // transport vesicle // inferred from sequence or structural similarity /// 30133 // transport vesicle // inferred from sequence similarity	IPR004877 // Cytochrome b561 // 5.1E-101 /// IPR004877 // Cytochrome b561 // 2.6E-93 /// IPR004877 // Cytochrome b561 // 5.1E-101
11480	152679_at	-0.890302	2.59215	-11.6686	5.82e-13	2.19e-11	19.3871	FBgn0039321	CG10550	CG10550	CG10550	43061	16301 // kinase activity // inferred from electronic annotation /// 16740 // transferase activity // inferred from electronic annotation	---	---	IPR004119 // Protein of unknown function DUF227 // 6.1E-114
10814	152013_at	-1.19486	2.63906	-11.645	6.13e-13	2.3e-11	19.3344	FBgn0027586	CG5867	CG5867	CG5867	34728	---	---	---	IPR004272 // Odorant binding protein // 2.2E-52
13463	154662_at	-0.798946	2.95263	-11.633	6.29e-13	2.35e-11	19.3077	FBgn0032222	CG5037	CG5037	CG5037	34394	8415 // acyltransferase activity // inferred from electronic annotation /// 8495 // protoheme IX farnesyltransferase activity // inferred from sequence or structural similarity /// 4659 // prenyltransferase activity // inferred from electronic annotation /// 8495 // protoheme IX farnesyltransferase activity // inferred from electronic annotation /// 8495 // protoheme IX farnesyltransferase activi…	6732 // coenzyme metabolism // inferred from electronic annotation /// 48034 // heme o biosynthesis // inferred from sequence or structural similarity /// 6783 // heme biosynthesis // inferred from electronic annotation /// 48034 // heme o biosynthesis // inferred from sequence similarity	5740 // mitochondrial envelope // inferred from sequence or structural similarity /// 16021 // integral to membrane // inferred from electronic annotation /// 5740 // mitochondrial envelope // inferred from sequence similarity	IPR000537 // UbiA prenyltransferase // 2.4E-61
1013	142212_at	-1.17418	2.15286	-11.6205	6.47e-13	2.41e-11	19.2798	FBgn0010651	CG15095	l(2)08717	lethal (2) 08717	46085	5316 // high affinity inorganic phosphate:sodium symporter activity // inferred from sequence or structural similarity /// 5215 // transporter activity // inferred from electronic annotation /// 5316 // high affinity inorganic phosphate:sodium symporter activity // inferred from sequence similarity	5975 // carbohydrate metabolism // inferred from electronic annotation /// 6796 // phosphate metabolism // inferred from electronic annotation /// 6812 // cation transport // inferred from electronic annotation /// 6817 // phosphate transport // inferred from electronic annotation /// 6858 // extracellular transport // inferred from electronic annotation /// 6810 // transport // inferred from ele…	16021 // integral to membrane // inferred from electronic annotation /// 16020 // membrane // inferred from electronic annotation	IPR005828 // General substrate transporter // 9.5E-5
2308	143507_at	-1.22141	2.35817	-11.6139	6.56e-13	2.44e-11	19.265	FBgn0004657	CG1560	mys	myospheroid	44885	4872 // receptor activity // traceable author statement /// 50839 // cell adhesion molecule binding // traceable author statement /// 4872 // receptor activity // inferred from electronic annotation /// 5515 // protein binding // inferred from electronic annotation	6952 // defense response // inferred from electronic annotation /// 7010 // cytoskeleton organization and biogenesis // inferred from electronic annotation /// 7155 // cell adhesion // inferred from mutant phenotype /// 7157 // heterophilic cell adhesion // traceable author statement /// 7160 // cell-matrix adhesion // traceable author statement /// 7165 // signal transduction // inferred from el…	5925 // focal adhesion // inferred from sequence or structural similarity /// 8305 // integrin complex // inferred from sequence or structural similarity /// 8305 // integrin complex // non-traceable author statement /// 8305 // integrin complex // inferred from electronic annotation /// 16020 // membrane // inferred from electronic annotation /// 16021 // integral to membrane // inferred from el…	IPR002369 // Integrin, beta chain // 1.0E-126
4877	146076_at	-0.869049	3.18758	-11.5869	6.97e-13	2.57e-11	19.2045	FBgn0040097	CG17011	lectin-30A	lectin-30A	53541	5534 // galactose binding // inferred from sequence or structural similarity /// 5534 // galactose binding // inferred from sequence similarity	7283 // spermatogenesis // inferred from electronic annotation	---	IPR001304 // C-type lectin // 2.0E-7
9421	150620_at	-0.622537	0.957926	-11.5239	8.02e-13	2.91e-11	19.0631	FBgn0039378	CG5878	4GT2	4GT2	43124	8378 // galactosyltransferase activity // inferred from electronic annotation /// 16740 // transferase activity // inferred from electronic annotation /// 16757 // transferase activity, transferring glycosyl groups // inferred from electronic annotation	5975 // carbohydrate metabolism // inferred from electronic annotation /// 6629 // lipid metabolism // inferred from electronic annotation	5795 // Golgi stack // inferred from electronic annotation	---
9222	150421_at	-1.10027	3.06914	-11.5154	8.17e-13	2.96e-11	19.044	FBgn0039049	CG6726	CG6726	CG6726	42728	4046 // aminoacylase activity // non-traceable author statement /// 8237 // metallopeptidase activity // inferred from electronic annotation /// 4046 // aminoacylase activity // inferred from electronic annotation /// 16787 // hydrolase activity // inferred from electronic annotation /// 46983 // protein dimerization activity // inferred from electronic annotation	6508 // proteolysis // inferred from electronic annotation /// 6520 // amino acid metabolism // inferred from electronic annotation	5737 // cytoplasm // inferred from electronic annotation	IPR002933 // Peptidase M20 // 7.9E-91 /// IPR002933 // Peptidase M20 // 7.9E-91
9283	150482_at	-1.32222	1.34264	-11.497	8.51e-13	3.07e-11	19.0028	FBgn0039151	CG13607	CG13607	CG13607	42859	---	---	---	---
8437	149636_at	-0.746416	0.816126	-11.4936	8.57e-13	3.09e-11	18.995	FBgn0037824	CG14684	CG14684	CG14684	41281	---	---	---	---
11445	152644_at	-1.03557	1.57031	-11.4719	9e-13	3.23e-11	18.9461	FBgn0038398	CG4979	sxe2	sex-specific enzyme 2	41954	17063 // phosphatidylserine-specific phospholipase A1 activity // inferred from sequence or structural similarity /// 3824 // catalytic activity // inferred from electronic annotation /// 17063 // phosphatidylserine-specific phospholipase A1 activity // inferred from sequence similarity	6629 // lipid metabolism // inferred from electronic annotation	---	IPR000734 // Lipase // 4.6E-21
3449	144648_at	-0.869999	3.40747	-11.4696	9.04e-13	3.24e-11	18.9411	FBgn0029948	CG15033	CheA7a	CheA7a	31672	---	---	---	---
11864	153063_at	-0.711671	2.3302	-11.457	9.3e-13	3.32e-11	18.9126	FBgn0032713	CG17323	CG17323	CG17323	35138	15020 // glucuronosyltransferase activity // inferred from sequence or structural similarity /// 16740 // transferase activity // inferred from electronic annotation /// 16757 // transferase activity, transferring glycosyl groups // inferred from electronic annotation /// 16758 // transferase activity, transferring hexosyl groups // inferred from electronic annotation /// 15020 // glucuronosyltra…	5976 // polysaccharide metabolism // inferred from electronic annotation /// 6952 // defense response // inferred from electronic annotation /// 8202 // steroid metabolism // inferred from electronic annotation /// 9636 // response to toxin // inferred from electronic annotation /// 8152 // metabolism // inferred from electronic annotation	---	IPR002213 // UDP-glucoronosyl/UDP-glucosyl transferase // 1.9E-42
5524	146723_at	-0.733682	1.14836	-11.448	9.49e-13	3.37e-11	18.8923	---	---	---	---	---	---	---	---	---
1299	142498_at	-1.18798	4.6427	-11.4384	9.7e-13	3.43e-11	18.8706	FBgn0039830	CG1746	CG1746	CG1746	43693	8553 // hydrogen-exporting ATPase activity, phosphorylative mechanism // inferred from sequence or structural similarity /// 8553 // hydrogen-exporting ATPase activity, phosphorylative mechanism // non-traceable author statement /// 46933 // hydrogen-transporting ATP synthase activity, rotational mechanism // inferred from electronic annotation /// 46961 // hydrogen-transporting ATPase activity, …	6144 // purine base metabolism // inferred from electronic annotation /// 15986 // ATP synthesis coupled proton transport // inferred from electronic annotation /// 15992 // proton transport // inferred from sequence or structural similarity /// 15992 // proton transport // inferred from sequence similarity	276 // proton-transporting ATP synthase complex, coupling factor F(o) (sensu Eukaryota) // inferred from sequence or structural similarity /// 16020 // membrane // inferred from electronic annotation /// 16469 // proton-transporting two-sector ATPase complex // inferred from electronic annotation /// 276 // proton-transporting ATP synthase complex, coupling factor F(o) (sensu Eukaryota) // inferr…	IPR002379 // H+-transporting two-sector ATPase, C subunit // 2.5E-29
1069	142268_at	-0.928361	1.06412	-11.4132	1.03e-12	3.59e-11	18.8136	FBgn0051752	CG31752	CG31752	CG31752	35143	---	---	---	---
5230	146429_at	-1.53507	2.15953	-11.4143	1.02e-12	3.59e-11	18.8162	FBgn0032669	CG15155	CG15155	CG15155	35087	---	---	---	IPR000182 // GCN5-related N-acetyltransferase // 1.1E-5
10709	151908_at	-0.965501	2.36621	-11.4061	1.04e-12	3.64e-11	18.7978	FBgn0030668	CG8128	CG8128	CG8128	32504	16791 // phosphoric monoester hydrolase activity // inferred from electronic annotation /// 19204 // nucleotide phosphatase activity // inferred from electronic annotation /// 16787 // hydrolase activity // inferred from electronic annotation	6139 // nucleobase, nucleoside, nucleotide and nucleic acid metabolism // inferred from electronic annotation /// 6397 // mRNA processing // inferred from electronic annotation /// 8283 // cell proliferation // inferred from electronic annotation	---	IPR000086 // NUDIX hydrolase // 8.2E-28
8242	149441_at	-0.942387	1.22159	-11.385	1.09e-12	3.81e-11	18.75	FBgn0037498	CG10029	CG10029	CG10029	40883	3756 // protein disulfide isomerase activity // inferred from sequence or structural similarity /// 3756 // protein disulfide isomerase activity // inferred from sequence similarity	6118 // electron transport // inferred from electronic annotation	---	IPR006662 // Thioredoxin type domain // 1.4E-17
13951	155150_at	-0.807204	3.54068	-11.3753	1.12e-12	3.88e-11	18.7279	---	CG6782 /// CG6783	---	---	---	5371 // tricarboxylate carrier activity // inferred from sequence or structural similarity /// 5386 // carrier activity // inferred from sequence or structural similarity /// 5215 // transporter activity // inferred from electronic annotation /// 5504 // fatty acid binding // inferred from sequence or structural similarity /// 5488 // binding // inferred from electronic annotation /// 8289 // lip…	6810 // transport // inferred from electronic annotation	5740 // mitochondrial envelope // inferred from sequence or structural similarity /// 5743 // mitochondrial inner membrane // inferred from electronic annotation /// 16020 // membrane // inferred from electronic annotation /// 16021 // integral to membrane // inferred from electronic annotation	---
2901	144100_at	-0.939886	2.73546	-11.349	1.18e-12	4.11e-11	18.6684	FBgn0025827	CG6421	CG6421	CG6421	46813	5509 // calcium ion binding // inferred from electronic annotation	6952 // defense response // inferred from electronic annotation /// 42742 // defense response to bacteria // inferred from electronic annotation	---	IPR008597 // Destabilase // 2.0E-78
11723	152922_at	-0.573914	0.337081	-11.3361	1.22e-12	4.22e-11	18.6389	FBgn0003244	CG6775	rg	rugose	44531	16491 // oxidoreductase activity // inferred from electronic annotation /// 51018 // protein kinase A binding // inferred from direct assay /// 51018 // protein kinase A binding // non-traceable author statement /// 5515 // protein binding // inferred from physical interaction /// 5488 // binding // inferred from electronic annotation	6118 // electron transport // inferred from electronic annotation /// 6605 // protein targeting // inferred from electronic annotation /// 8104 // protein localization // inferred from direct assay /// 8104 // protein localization // non-traceable author statement /// 42674 // cone cell differentiation (sensu Endopterygota) // inferred from mutant phenotype /// 42462 // eye photoreceptor cell dev…	5737 // cytoplasm // inferred from direct assay /// 16021 // integral to membrane // inferred from direct assay /// 16020 // membrane // inferred from electronic annotation /// 16021 // integral to membrane // inferred from electronic annotation	IPR010508 // Protein of unknown function DUF1088 // 1.0E-126 /// IPR000409 // Beige/BEACH domain // 1.0E-126 /// IPR001680 // G-protein beta WD-40 repeat // 1.4E-8 /// IPR001680 // G-protein beta WD-40 repeat // 1.5E-4 /// IPR001680 // G-protein beta WD-40 repeat // 0.088 /// IPR001680 // G-protein beta WD-40 repeat // 0.051 /// IPR010508 // Protein of unknown function DUF1088 // 1.0E-126 /// IPR…
8106	149305_at	-0.559452	2.58423	-11.333	1.23e-12	4.24e-11	18.632	FBgn0037290	CG1124	CG1124	CG1124	40613	5515 // protein binding // inferred from physical interaction	---	---	IPR004272 // Odorant binding protein // 4.5E-48
6038	147237_at	-1.22869	3.11039	-11.2837	1.37e-12	4.71e-11	18.5198	FBgn0001187	CG8094	Hex-C	Hexokinase C	44008	4396 // hexokinase activity // inferred from direct assay /// 4396 // hexokinase activity // inferred from sequence or structural similarity /// 4396 // hexokinase activity // non-traceable author statement /// 5524 // ATP binding // inferred from electronic annotation /// 166 // nucleotide binding // inferred from electronic annotation /// 4396 // hexokinase activity // inferred from electronic …	6096 // glycolysis // inferred from electronic annotation	---	IPR001312 // Hexokinase // 1.2E-100 /// IPR001312 // Hexokinase // 2.6E-89
940	142139_at	-1.82175	2.89332	-11.2788	1.39e-12	4.75e-11	18.5087	FBgn0040349	CG3699	CG3699	CG3699	31046	16614 // oxidoreductase activity, acting on CH-OH group of donors // inferred from sequence or structural similarity /// 16491 // oxidoreductase activity // inferred from electronic annotation /// 16614 // oxidoreductase activity, acting on CH-OH group of donors // inferred from sequence similarity	8152 // metabolism // inferred from electronic annotation	---	IPR002198 // Short-chain dehydrogenase/reductase SDR // 4.1E-83
11716	152915_at	-0.922224	0.967564	-11.2621	1.44e-12	4.92e-11	18.4707	FBgn0030589	CG9519	CG9519	CG9519	32415	8812 // choline dehydrogenase activity // inferred from sequence or structural similarity /// 50660 // FAD binding // inferred from electronic annotation /// 16491 // oxidoreductase activity // inferred from electronic annotation /// 16614 // oxidoreductase activity, acting on CH-OH group of donors // inferred from electronic annotation /// 8812 // choline dehydrogenase activity // inferred from …	6118 // electron transport // inferred from electronic annotation /// 6066 // alcohol metabolism // inferred from electronic annotation	---	IPR000172 // Glucose-methanol-choline oxidoreductase // 3.1E-112 /// IPR007867 // GMC oxidoreductase // 4.9E-45
11832	153031_at	-0.891954	4.16232	-11.2568	1.46e-12	4.97e-11	18.4586	FBgn0038037	CG11466	Cyp9f2	Cyp9f2	41520	4497 // monooxygenase activity // inferred from electronic annotation /// 16491 // oxidoreductase activity // inferred from electronic annotation /// 5506 // iron ion binding // inferred from electronic annotation /// 20037 // heme binding // inferred from electronic annotation /// 46872 // metal ion binding // inferred from electronic annotation	6118 // electron transport // inferred from electronic annotation	5792 // microsome // non-traceable author statement /// 16020 // membrane // non-traceable author statement /// 5783 // endoplasmic reticulum // inferred from electronic annotation /// 5792 // microsome // inferred from electronic annotation /// 16020 // membrane // inferred from electronic annotation	IPR001128 // Cytochrome P450 // 1.5E-76 /// IPR001128 // Cytochrome P450 // 1.5E-79
6273	147472_at	-0.878788	3.57893	-11.2465	1.49e-12	5.07e-11	18.4351	FBgn0034405	CG15102	Jheh2	Juvenile hormone epoxide hydrolase 2	37181	4301 // epoxide hydrolase activity // inferred from sequence or structural similarity /// 8096 // juvenile hormone epoxide hydrolase activity // non-traceable author statement /// 5515 // protein binding // inferred from physical interaction /// 3824 // catalytic activity // inferred from electronic annotation /// 4301 // epoxide hydrolase activity // inferred from electronic annotation /// 16787…	6719 // juvenile hormone catabolism // non-traceable author statement /// 6952 // defense response // inferred from electronic annotation /// 9636 // response to toxin // inferred from electronic annotation /// 19439 // aromatic compound catabolism // inferred from electronic annotation	5792 // microsome // inferred from sequence or structural similarity /// 5783 // endoplasmic reticulum // inferred from electronic annotation /// 5792 // microsome // inferred from electronic annotation /// 16020 // membrane // inferred from electronic annotation /// 16021 // integral to membrane // inferred from electronic annotation /// 5792 // microsome // inferred from sequence similarity	IPR000073 // Alpha/beta hydrolase fold // 9.3E-13 /// IPR010497 // Epoxide hydrolase, N-terminal // 1.7E-69 /// IPR010497 // Epoxide hydrolase, N-terminal // 2.2E-37
2090	143289_at	-0.967456	4.58053	-11.2187	1.59e-12	5.37e-11	18.3717	FBgn0003034	CG17673	Acp70A	Accessory gland peptide 70A	39494	5179 // hormone activity // non-traceable author statement /// 5515 // protein binding // inferred from physical interaction	6718 // juvenile hormone biosynthesis // non-traceable author statement /// 7557 // regulation of juvenile hormone biosynthesis // traceable author statement /// 7621 // negative regulation of female receptivity // non-traceable author statement /// 7621 // negative regulation of female receptivity // traceable author statement /// 9993 // oogenesis (sensu Insecta) // traceable author statement /…	5576 // extracellular region // non-traceable author statement /// 5576 // extracellular region // traceable author statement	---
210	141409_at	-1.23247	1.36587	-11.2138	1.61e-12	5.42e-11	18.3605	FBgn0039154	CG6164	CG6164	CG6164	42864	5515 // protein binding // inferred from physical interaction	---	---	IPR003172 // E1 protein and Def2/Der2 allergen // 2.3E-29
550	141749_at	-1.85997	4.09016	-11.1944	1.68e-12	5.64e-11	18.3161	FBgn0013576	CG32464	l(3)82Fd	l(3)82Fd	45467	5515 // protein binding // inferred from physical interaction	16998 // cell wall catabolism // inferred from electronic annotation	---	IPR002482 // Peptidoglycan-binding LysM // 1.0E-15 /// IPR002482 // Peptidoglycan-binding LysM // 1.0E-15
11295	152494_at	-2.51518	3.67771	-11.1946	1.68e-12	5.64e-11	18.3166	FBgn0033065	CG8345	Cyp6w1	Cyp6w1	35543	4497 // monooxygenase activity // inferred from electronic annotation /// 16491 // oxidoreductase activity // inferred from electronic annotation /// 5506 // iron ion binding // inferred from electronic annotation /// 20037 // heme binding // inferred from electronic annotation /// 46872 // metal ion binding // inferred from electronic annotation	6118 // electron transport // inferred from electronic annotation	5792 // microsome // non-traceable author statement /// 16020 // membrane // non-traceable author statement /// 5783 // endoplasmic reticulum // inferred from electronic annotation /// 5792 // microsome // inferred from electronic annotation /// 16020 // membrane // inferred from electronic annotation	IPR001128 // Cytochrome P450 // 1.7E-89
11030	152229_at	-1.28733	1.71407	-11.1708	1.77e-12	5.93e-11	18.2619	FBgn0038952	CG7069	CG7069	CG7069	42621	4743 // pyruvate kinase activity // inferred from sequence or structural similarity /// 19200 // carbohydrate kinase activity // inferred from electronic annotation /// 287 // magnesium ion binding // inferred from electronic annotation /// 4743 // pyruvate kinase activity // inferred from electronic annotation /// 16301 // kinase activity // inferred from electronic annotation /// 16740 // trans…	6096 // glycolysis // inferred from electronic annotation	---	IPR001697 // Pyruvate kinase // 2.8E-6 /// IPR001697 // Pyruvate kinase // 1.0E-126
7365	148564_at	-0.839632	1.41475	-11.1617	1.81e-12	6.04e-11	18.2411	FBgn0036145	CG7607	CG7607	CG7607	39263	---	7275 // development // inferred from electronic annotation	---	IPR007110 // Immunoglobulin-like // 1.6E-6
8395	149594_at	-0.78489	2.50742	-11.1473	1.87e-12	6.23e-11	18.208	FBgn0037764	CG9459	CG9459	CG9459	41213	8415 // acyltransferase activity // inferred from electronic annotation /// 16740 // transferase activity // inferred from electronic annotation	6629 // lipid metabolism // inferred from electronic annotation /// 6631 // fatty acid metabolism // inferred from electronic annotation	16021 // integral to membrane // inferred from electronic annotation	---
11233	152432_at	-0.671724	0.506992	-11.0983	2.09e-12	6.88e-11	18.0956	FBgn0028480	CG17841	CG17841	CG17841	31965	5515 // protein binding // inferred from physical interaction	---	16021 // integral to membrane // inferred from electronic annotation	IPR010283 // Eukaryotic protein of unknown function DUF887 // 3.0E-5
5547	146746_at	-1.0653	4.1275	-11.0919	2.12e-12	6.96e-11	18.0809	FBgn0033189	CG2140	Cyt-b5	Cyt-b5	35688	16491 // oxidoreductase activity // inferred from electronic annotation /// 5506 // iron ion binding // inferred from electronic annotation /// 46872 // metal ion binding // inferred from electronic annotation	6118 // electron transport // non-traceable author statement /// 8202 // steroid metabolism // inferred from electronic annotation /// 6118 // electron transport // inferred from electronic annotation /// 6810 // transport // inferred from electronic annotation	5792 // microsome // inferred from sequence or structural similarity /// 5792 // microsome // non-traceable author statement /// 16020 // membrane // non-traceable author statement /// 5783 // endoplasmic reticulum // inferred from electronic annotation /// 5792 // microsome // inferred from electronic annotation /// 16020 // membrane // inferred from electronic annotation /// 16021 // integral t…	IPR001199 // Cytochrome b5 // 2.3E-22 /// IPR001199 // Cytochrome b5 // 4.1E-9 /// IPR001199 // Cytochrome b5 // 4.1E-9
5453	146652_at	-0.779945	2.7197	-11.0796	2.18e-12	7.14e-11	18.0525	FBgn0033035	CG17337	CG17337	CG17337	35507	5515 // protein binding // inferred from physical interaction /// 8237 // metallopeptidase activity // inferred from electronic annotation /// 16787 // hydrolase activity // inferred from electronic annotation /// 46983 // protein dimerization activity // inferred from electronic annotation	6508 // proteolysis // inferred from electronic annotation	---	IPR002933 // Peptidase M20 // 6.3E-67
4250	145449_at	-0.651393	0.643805	-11.074	2.21e-12	7.22e-11	18.0396	FBgn0031140	CG12092	NPC1b	NPC1b	33072	4197 // cysteine-type endopeptidase activity // inferred from electronic annotation /// 4872 // receptor activity // inferred from electronic annotation /// 8158 // hedgehog receptor activity // inferred from electronic annotation	6508 // proteolysis // inferred from electronic annotation /// 6629 // lipid metabolism // inferred from electronic annotation /// 6869 // lipid transport // inferred from electronic annotation	5886 // plasma membrane // inferred from sequence or structural similarity /// 5886 // plasma membrane // inferred from sequence similarity	IPR003392 // Patched family // 6.5E-29 /// IPR003392 // Patched family // 4.5E-7
2625	143824_at	-1.03512	2.1661	-11.0669	2.24e-12	7.32e-11	18.0233	FBgn0015583	CG17797	Acp29AB	Accessory gland-specific peptide 29AB	34162	5179 // hormone activity // non-traceable author statement /// 5529 // sugar binding // inferred from sequence or structural similarity /// 5534 // galactose binding // inferred from sequence or structural similarity /// 5515 // protein binding // inferred from physical interaction /// 5529 // sugar binding // inferred from electronic annotation /// 5529 // sugar binding // inferred from sequence…	7283 // spermatogenesis // inferred from electronic annotation /// 7321 // sperm displacement // non-traceable author statement /// 7582 // physiological process // non-traceable author statement /// 45297 // post-mating behavior // non-traceable author statement /// 46692 // sperm competition // traceable author statement /// 7610 // behavior // inferred from electronic annotation	5576 // extracellular region // non-traceable author statement	IPR001304 // C-type lectin // 1.8E-9
9170	150369_at	-1.1784	1.98564	-11.0527	2.31e-12	7.54e-11	17.9905	FBgn0038973	CG18594	CG18594	CG18594	42644	19207 // kinase regulator activity // inferred from electronic annotation /// 19210 // kinase inhibitor activity // inferred from electronic annotation /// 5515 // protein binding // inferred from physical interaction	7165 // signal transduction // inferred from electronic annotation	---	IPR008914 // PEBP // 1.9E-57
10793	151992_at	-0.967874	2.54955	-11.0413	2.38e-12	7.71e-11	17.9643	FBgn0037302	CG10233	CG10233	CG10233	40627	5515 // protein binding // inferred from physical interaction	---	---	IPR003409 // MORN motif // 1.5E-6 /// IPR003409 // MORN motif // 5.6E-6 /// IPR003409 // MORN motif // 1.3E-6 /// IPR003409 // MORN motif // 1.1E-4
8637	149836_at	-0.715331	2.22601	-11.039	2.39e-12	7.73e-11	17.9588	FBgn0038142	CG14379	CheA87a	CheA87a	41642	---	---	---	---
11415	152614_at	-1.05218	2.7979	-10.9685	2.81e-12	9.04e-11	17.7958	FBgn0031702	CG14021	CG14021	CG14021	33765	---	---	---	---
6850	148049_at	-0.995562	1.00588	-10.8701	3.52e-12	1.13e-10	17.5672	FBgn0035344	CG16761	Cyp4d20	Cyp4d20	38311	4497 // monooxygenase activity // inferred from electronic annotation /// 16491 // oxidoreductase activity // inferred from electronic annotation /// 5506 // iron ion binding // inferred from electronic annotation /// 20037 // heme binding // inferred from electronic annotation /// 46872 // metal ion binding // inferred from electronic annotation	6118 // electron transport // inferred from electronic annotation	5792 // microsome // non-traceable author statement /// 16020 // membrane // non-traceable author statement /// 16020 // membrane // inferred from electronic annotation	IPR001128 // Cytochrome P450 // 3.9E-114
157	141356_at	-0.696445	3.02179	-10.8339	3.82e-12	1.22e-10	17.4829	FBgn0036762	CG7430	CG7430	CG7430	39988	4148 // dihydrolipoyl dehydrogenase activity // inferred from sequence or structural similarity /// 15036 // disulfide oxidoreductase activity // inferred from electronic annotation /// 46872 // metal ion binding // inferred from electronic annotation /// 4148 // dihydrolipoyl dehydrogenase activity // inferred from electronic annotation /// 16491 // oxidoreductase activity // inferred from elect…	6096 // glycolysis // inferred from electronic annotation /// 6099 // tricarboxylic acid cycle // inferred from sequence or structural similarity /// 6118 // electron transport // inferred from electronic annotation /// 6546 // glycine catabolism // inferred from sequence or structural similarity /// 6748 // lipoamide metabolism // inferred from sequence or structural similarity /// 6099 // trica…	5947 // alpha-ketoglutarate dehydrogenase complex (sensu Eukaryota) // inferred from sequence or structural similarity /// 5960 // glycine cleavage complex // inferred from sequence or structural similarity /// 5737 // cytoplasm // inferred from electronic annotation /// 5947 // alpha-ketoglutarate dehydrogenase complex (sensu Eukaryota) // inferred from sequence similarity /// 5960 // glycine cl…	IPR004099 // Pyridine nucleotide-disulphide oxidoreductase dimerisation domain // 1.2E-64 /// IPR001327 // FAD-dependent pyridine nucleotide-disulphide oxidoreductase // 5.1E-103
11899	153098_at	-1.43726	3.04911	-10.8284	3.87e-12	1.23e-10	17.4699	FBgn0039102	CG16705	CG16705	CG16705	42791	4263 // chymotrypsin activity // inferred from electronic annotation /// 4295 // trypsin activity // non-traceable author statement /// 8439 // monophenol monooxygenase activator activity // inferred from sequence or structural similarity /// 4252 // serine-type endopeptidase activity // inferred from electronic annotation /// 8233 // peptidase activity // inferred from electronic annotation /// …	6508 // proteolysis // non-traceable author statement /// 6521 // regulation of amino acid metabolism // inferred from electronic annotation /// 8652 // amino acid biosynthesis // inferred from electronic annotation /// 6508 // proteolysis // inferred from electronic annotation	---	IPR001254 // Peptidase S1, chymotrypsin // 8.0E-69
1214	142413_at	-1.69211	3.58022	-10.8221	3.93e-12	1.25e-10	17.4552	FBgn0039800	CG11314	CG11314	CG11314	43648	---	7498 // mesoderm development // inferred from expression pattern	---	IPR003172 // E1 protein and Def2/Der2 allergen // 4.2E-46 /// IPR003172 // E1 protein and Def2/Der2 allergen // 4.2E-46
2839	144038_at	-1.22084	1.76611	-10.7946	4.19e-12	1.32e-10	17.3911	FBgn0024963	CG7535	GluCl	GluCl	---	8068 // glutamate-gated chloride channel activity // inferred from direct assay /// 4872 // receptor activity // inferred from electronic annotation /// 4890 // GABA-A receptor activity // inferred from electronic annotation /// 5216 // ion channel activity // inferred from electronic annotation /// 5230 // extracellular ligand-gated ion channel activity // inferred from electronic annotation ///…	6821 // chloride transport // inferred from direct assay /// 6810 // transport // inferred from electronic annotation /// 6811 // ion transport // inferred from electronic annotation	16020 // membrane // inferred from electronic annotation /// 16021 // integral to membrane // inferred from electronic annotation /// 45211 // postsynaptic membrane // inferred from electronic annotation	IPR006029 // Neurotransmitter-gated ion-channel transmembrane region // 2.4E-33 /// IPR006029 // Neurotransmitter-gated ion-channel transmembrane region // 2.0E-7 /// IPR006202 // Neurotransmitter-gated ion-channel ligand binding domain // 2.7E-65
6706	147905_at	-0.914573	2.09863	-10.7418	4.73e-12	1.48e-10	17.2674	FBgn0003715	CG16778	Tkr	Tyrosine kinase-related protein	38007	3677 // DNA binding // inferred from sequence or structural similarity /// 3677 // DNA binding // non-traceable author statement /// 3779 // actin binding // inferred from electronic annotation /// 5200 // structural constituent of cytoskeleton // inferred from electronic annotation /// 3677 // DNA binding // inferred from electronic annotation /// 5515 // protein binding // inferred from electro…	---	5634 // nucleus // inferred from electronic annotation	IPR000210 // BTB/POZ domain // 1.8E-25 /// IPR007889 // Helix-turn-helix, Psq // 5.7E-13
6855	148054_at	-1.07677	1.8545	-10.73	4.86e-12	1.51e-10	17.2396	FBgn0035355	CG16985	CG16985	CG16985	38323	5515 // protein binding // inferred from physical interaction /// 3824 // catalytic activity // inferred from electronic annotation	---	---	IPR006683 // Thioesterase superfamily // 5.9E-18
5462	146661_at	-0.604409	0.569388	-10.678	5.49e-12	1.69e-10	17.1173	FBgn0033048	CG7881	CG7881	CG7881	35521	5316 // high affinity inorganic phosphate:sodium symporter activity // inferred from sequence or structural similarity /// 5215 // transporter activity // inferred from electronic annotation /// 5316 // high affinity inorganic phosphate:sodium symporter activity // inferred from sequence similarity	6796 // phosphate metabolism // inferred from electronic annotation /// 6812 // cation transport // inferred from electronic annotation /// 6817 // phosphate transport // inferred from electronic annotation /// 6858 // extracellular transport // inferred from electronic annotation /// 6810 // transport // inferred from electronic annotation	16021 // integral to membrane // inferred from electronic annotation /// 16020 // membrane // inferred from electronic annotation	---
13892	155091_at	-1.02781	5.27019	-10.6692	5.6e-12	1.72e-10	17.0966	FBgn0015766	CG10596	Msr-110	Msr-110	38629	---	---	---	---
420	141619_at	-0.985778	4.4462	-10.6674	5.63e-12	1.73e-10	17.0924	FBgn0021953	CG7400	Fatp	Fatty acid (long chain) transport protein	44227	3824 // catalytic activity // inferred from electronic annotation /// 5324 // long-chain fatty acid transporter activity // inferred from sequence or structural similarity /// 5324 // long-chain fatty acid transporter activity // inferred from sequence similarity	6631 // fatty acid metabolism // inferred from electronic annotation /// 15909 // long-chain fatty acid transport // inferred from sequence or structural similarity /// 8152 // metabolism // inferred from electronic annotation /// 15909 // long-chain fatty acid transport // inferred from sequence similarity	5886 // plasma membrane // inferred from sequence or structural similarity /// 5886 // plasma membrane // inferred from sequence similarity	IPR000873 // AMP-dependent synthetase and ligase // 9.3E-87
5945	147144_at	-1.17477	1.43125	-10.6481	5.88e-12	1.8e-10	17.0469	FBgn0033826	CG4734	CG4734	CG4734	36477	---	---	---	---
2462	143661_at	-0.695761	0.859319	-10.6371	6.04e-12	1.84e-10	17.0209	FBgn0011556	CG12387	Try	Trypsin	36216	4263 // chymotrypsin activity // inferred from electronic annotation /// 4295 // trypsin activity // inferred from sequence or structural similarity /// 4295 // trypsin activity // non-traceable author statement /// 5515 // protein binding // inferred from physical interaction /// 4252 // serine-type endopeptidase activity // inferred from electronic annotation /// 4295 // trypsin activity // inf…	6508 // proteolysis // non-traceable author statement /// 6508 // proteolysis // inferred from electronic annotation	5576 // extracellular region // non-traceable author statement	IPR001254 // Peptidase S1, chymotrypsin // 3.5E-74
10810	152009_at	-0.796383	2.17293	-10.6341	6.08e-12	1.85e-10	17.0138	FBgn0030692	CG8470	mRpS30	mitochondrial ribosomal protein S30	32530	3735 // structural constituent of ribosome // inferred from sequence or structural similarity /// 5515 // protein binding // inferred from physical interaction /// 3735 // structural constituent of ribosome // inferred from electronic annotation /// 3735 // structural constituent of ribosome // inferred from sequence similarity	6412 // protein biosynthesis // inferred from sequence or structural similarity /// 6412 // protein biosynthesis // inferred from electronic annotation /// 6412 // protein biosynthesis // inferred from sequence similarity	5763 // mitochondrial small ribosomal subunit // inferred from sequence or structural similarity /// 5739 // mitochondrion // inferred from electronic annotation /// 5840 // ribosome // inferred from electronic annotation /// 5763 // mitochondrial small ribosomal subunit // inferred from sequence similarity	IPR010793 // Mitochondrial 28S ribosomal S30 // 1.0E-126
12849	154048_at	-0.666363	2.19353	-10.6306	6.13e-12	1.86e-10	17.0056	FBgn0026576	CG5991	CG5991	CG5991	42849	4609 // phosphatidylserine decarboxylase activity // inferred from sequence or structural similarity /// 4609 // phosphatidylserine decarboxylase activity // inferred from electronic annotation /// 4609 // phosphatidylserine decarboxylase activity // inferred from sequence similarity	6644 // phospholipid metabolism // inferred from electronic annotation /// 8654 // phospholipid biosynthesis // inferred from electronic annotation	---	IPR003817 // Phosphatidylserine decarboxylase-related // 5.5E-51
7133	148332_at	-1.00427	1.67366	-10.6211	6.27e-12	1.9e-10	16.9831	FBgn0035779	CG8562	CG8562	CG8562	38828	4181 // metallocarboxypeptidase activity // inferred from sequence or structural similarity /// 4182 // carboxypeptidase A activity // inferred from electronic annotation /// 4181 // metallocarboxypeptidase activity // inferred from sequence similarity	6508 // proteolysis // inferred from electronic annotation	---	IPR000834 // Peptidase M14, carboxypeptidase A // 1.1E-66
7439	148638_at	-1.64613	2.30322	-10.6004	6.58e-12	1.99e-10	16.9343	FBgn0027843	CG6906	CAH2	Carbonic anhydrase 2	39390	4089 // carbonate dehydratase activity // inferred from sequence or structural similarity /// 4089 // carbonate dehydratase activity // non-traceable author statement /// 8270 // zinc ion binding // inferred from electronic annotation /// 5515 // protein binding // inferred from physical interaction /// 4089 // carbonate dehydratase activity // inferred from electronic annotation /// 4089 // carb…	6730 // one-carbon compound metabolism // inferred from electronic annotation	---	IPR001148 // Carbonic anhydrase, eukaryotic // 9.3E-57
5177	146376_at	-0.796018	1.75042	-10.5981	6.61e-12	1.99e-10	16.9288	FBgn0032603	CG17928	CG17928	CG17928	35009	16491 // oxidoreductase activity // inferred from electronic annotation	---	---	IPR005804 // Fatty acid desaturase // 3.1E-34 /// IPR001199 // Cytochrome b5 // 4.5E-18
171	141370_at	-0.830432	2.8766	-10.5807	6.89e-12	2.07e-10	16.8876	FBgn0027945	CG7758	ppl	pumpless	40349	16787 // hydrolase activity // inferred from electronic annotation /// 31405 // lipoic acid binding // inferred from electronic annotation	6546 // glycine catabolism // inferred from sequence or structural similarity /// 6546 // glycine catabolism // inferred from electronic annotation /// 6546 // glycine catabolism // inferred from sequence similarity	5739 // mitochondrion // inferred from sequence or structural similarity /// 5960 // glycine cleavage complex // inferred from sequence or structural similarity /// 5739 // mitochondrion // inferred from electronic annotation /// 5960 // glycine cleavage complex // inferred from electronic annotation /// 5739 // mitochondrion // inferred from sequence similarity /// 5960 // glycine cleavage compl…	IPR002930 // Glycine cleavage H-protein // 4.2E-62
7212	148411_at	-0.86113	0.4527	-10.5551	7.31e-12	2.18e-10	16.8271	FBgn0035905	CG6781	CG6781	CG6781	38973	4364 // glutathione transferase activity // inferred from sequence or structural similarity /// 5515 // protein binding // inferred from physical interaction /// 4364 // glutathione transferase activity // inferred from electronic annotation /// 16740 // transferase activity // inferred from electronic annotation /// 4364 // glutathione transferase activity // inferred from sequence similarity	6800 // oxygen and reactive oxygen species metabolism // inferred from electronic annotation /// 6952 // defense response // inferred from electronic annotation /// 9636 // response to toxin // inferred from electronic annotation /// 8152 // metabolism // inferred from electronic annotation	5737 // cytoplasm // inferred from electronic annotation	IPR004045 // Glutathione S-transferase, N-terminal // 3.0E-14
2199	143398_at	-1.09379	6.05344	-10.5478	7.44e-12	2.22e-10	16.8097	FBgn0003942	CG5271	RpS27A	Ribosomal protein S27A	34420	3676 // nucleic acid binding // inferred from electronic annotation /// 3735 // structural constituent of ribosome // inferred from sequence or structural similarity /// 3735 // structural constituent of ribosome // non-traceable author statement /// 5515 // protein binding // inferred from sequence or structural similarity /// 5515 // protein binding // inferred from physical interaction /// 373…	6325 // establishment and/or maintenance of chromatin architecture // non-traceable author statement /// 6355 // regulation of transcription, DNA-dependent // non-traceable author statement /// 6412 // protein biosynthesis // inferred from sequence or structural similarity /// 6464 // protein modification // inferred from sequence or structural similarity /// 6510 // ATP-dependent proteolysis // …	5634 // nucleus // non-traceable author statement /// 5737 // cytoplasm // non-traceable author statement /// 5840 // ribosome // non-traceable author statement /// 5843 // cytosolic small ribosomal subunit (sensu Eukaryota) // inferred from sequence or structural similarity /// 5622 // intracellular // inferred from electronic annotation /// 5840 // ribosome // inferred from electronic annotatio…	IPR002906 // Ribosomal protein S27a // 1.8E-31 /// IPR000626 // Ubiquitin // 3.8E-43
11341	152540_at	-1.20518	-0.243591	-10.539	7.59e-12	2.26e-10	16.789	FBgn0031248	CG11912	CG11912	CG11912	33205	4252 // serine-type endopeptidase activity // inferred from sequence or structural similarity /// 4252 // serine-type endopeptidase activity // non-traceable author statement /// 4263 // chymotrypsin activity // inferred from electronic annotation /// 4295 // trypsin activity // inferred from electronic annotation /// 4252 // serine-type endopeptidase activity // inferred from electronic annotati…	6508 // proteolysis // non-traceable author statement /// 6508 // proteolysis // inferred from electronic annotation	---	IPR001254 // Peptidase S1, chymotrypsin // 5.3E-55
8864	150063_at	-0.839255	0.406108	-10.537	7.63e-12	2.26e-10	16.784	---	---	---	---	---	---	---	---	---
4437	145636_at	-1.09333	2.34606	-10.526	7.83e-12	2.32e-10	16.758	FBgn0031417	CG3597	CG3597	CG3597	33420	16491 // oxidoreductase activity // inferred from electronic annotation	6118 // electron transport // inferred from electronic annotation /// 8152 // metabolism // inferred from electronic annotation	---	IPR000683 // Oxidoreductase, N-terminal // 5.6E-28 /// IPR004104 // Oxidoreductase, C-terminal // 7.9E-6
6856	148055_at	-1.13416	2.94057	-10.5151	8.03e-12	2.36e-10	16.7321	FBgn0035356	CG16986	CG16986	CG16986	38325	3824 // catalytic activity // inferred from electronic annotation	---	---	IPR006683 // Thioesterase superfamily // 2.5E-17
11357	152556_at	-1.03205	1.89727	-10.5089	8.15e-12	2.39e-10	16.7173	FBgn0019929	CG2045	Ser7	Ser7	31917	4197 // cysteine-type endopeptidase activity // inferred from electronic annotation /// 4252 // serine-type endopeptidase activity // inferred from sequence or structural similarity /// 4263 // chymotrypsin activity // inferred from electronic annotation /// 4295 // trypsin activity // non-traceable author statement /// 8236 // serine-type peptidase activity // inferred from sequence or structura…	6508 // proteolysis // non-traceable author statement /// 6508 // proteolysis // inferred from electronic annotation	---	IPR001254 // Peptidase S1, chymotrypsin // 6.6E-55
2474	143673_at	-1.11126	4.04552	-10.5067	8.19e-12	2.4e-10	16.7122	FBgn0011670	CG4986	Mst57Dc	Male-specific RNA 57Dc	43121	---	18991 // oviposition // non-traceable author statement /// 45297 // post-mating behavior // non-traceable author statement /// 7610 // behavior // inferred from electronic annotation	5576 // extracellular region // non-traceable author statement	---
5354	146553_at	-0.662291	1.01523	-10.4929	8.46e-12	2.47e-10	16.6794	FBgn0032888	CG14405	CheB38c	CheB38c	35346	5272 // sodium channel activity // inferred from electronic annotation	6814 // sodium ion transport // inferred from electronic annotation	16020 // membrane // inferred from electronic annotation	---
2373	143572_at	-0.7317	0.137441	-10.4747	8.83e-12	2.56e-10	16.636	FBgn0005670	CG3656	Cyp4d1	Cytochrome P450-4d1	31188	4497 // monooxygenase activity // inferred from electronic annotation /// 16491 // oxidoreductase activity // inferred from electronic annotation /// 5506 // iron ion binding // inferred from electronic annotation /// 20037 // heme binding // inferred from electronic annotation /// 46872 // metal ion binding // inferred from electronic annotation	6118 // electron transport // inferred from electronic annotation /// 8202 // steroid metabolism // inferred from electronic annotation	5792 // microsome // non-traceable author statement /// 16020 // membrane // non-traceable author statement /// 5783 // endoplasmic reticulum // inferred from electronic annotation /// 5792 // microsome // inferred from electronic annotation /// 16020 // membrane // inferred from electronic annotation	IPR001128 // Cytochrome P450 // 1.0E-126 /// IPR001128 // Cytochrome P450 // 1.0E-126
2439	143638_at	-0.81813	4.02947	-10.4743	8.84e-12	2.56e-10	16.6352	FBgn0011217	CG7425	eff	effete	41785	4840 // ubiquitin conjugating enzyme activity // inferred from genetic interaction /// 4840 // ubiquitin conjugating enzyme activity // inferred from sequence or structural similarity /// 4840 // ubiquitin conjugating enzyme activity // non-traceable author statement /// 4840 // ubiquitin conjugating enzyme activity // traceable author statement /// 5515 // protein binding // inferred from physic…	1745 // compound eye morphogenesis (sensu Endopterygota) // inferred from mutant phenotype /// 6512 // ubiquitin cycle // inferred from genetic interaction /// 6512 // ubiquitin cycle // inferred from sequence or structural similarity /// 7001 // chromosome organization and biogenesis (sensu Eukaryota) // inferred from mutant phenotype /// 7067 // mitosis // inferred from mutant phenotype /// 714…	---	IPR000608 // Ubiquitin-conjugating enzymes // 4.2E-81
10517	151716_s_at	-0.725932	1.72843	-10.4537	9.28e-12	2.68e-10	16.5861	FBgn0052043	CG32043	CG32043	CG32043	39099	---	---	---	---
3669	144868_at	-0.593053	2.09821	-10.4453	9.46e-12	2.72e-10	16.566	FBgn0030292	CG11752	CG11752	CG11752	32076	---	---	---	---
10746	151945_at	-0.680916	0.571501	-10.4399	9.59e-12	2.75e-10	16.5531	FBgn0002937	CG9347	ninaB	neither inactivation nor afterpotential B	41678	3834 // beta-carotene 15,15'-monooxygenase activity // inferred from direct assay /// 3834 // beta-carotene 15,15'-monooxygenase activity // inferred from mutant phenotype /// 3834 // beta-carotene 15,15'-monooxygenase activity // non-traceable author statement /// 16702 // oxidoreductase activity, acting on single donors with incorporation of molecular oxygen, incorporation of two atoms of oxyge…	6732 // coenzyme metabolism // inferred from electronic annotation /// 7601 // visual perception // inferred from electronic annotation /// 7602 // phototransduction // traceable author statement /// 7603 // phototransduction, visible light // inferred from mutant phenotype /// 7604 // phototransduction, UV // inferred from mutant phenotype /// 9110 // vitamin biosynthesis // inferred from electr…	---	IPR004294 // Retinal pigment epithelial membrane protein // 1.0E-126
5887	147086_at	-0.684143	0.743175	-10.4377	9.64e-12	2.75e-10	16.5478	FBgn0033723	CG13155	CG13155	CG13155	36346	---	---	---	---
2941	144140_at	-1.35663	5.44742	-10.4229	9.98e-12	2.84e-10	16.5126	FBgn0026409	CG4994	Mpcp	Mitochondrial phosphate carrier protein	39587	5386 // carrier activity // inferred from sequence or structural similarity /// 5488 // binding // inferred from electronic annotation /// 15114 // phosphate transporter activity // inferred from sequence or structural similarity /// 15114 // phosphate transporter activity // non-traceable author statement /// 5386 // carrier activity // inferred from sequence similarity /// 15114 // phosphate tr…	6796 // phosphate metabolism // inferred from electronic annotation /// 6817 // phosphate transport // inferred from sequence or structural similarity /// 6817 // phosphate transport // non-traceable author statement /// 6810 // transport // inferred from electronic annotation /// 6817 // phosphate transport // inferred from sequence similarity	5739 // mitochondrion // non-traceable author statement /// 5740 // mitochondrial envelope // inferred from sequence or structural similarity /// 5743 // mitochondrial inner membrane // inferred from sequence or structural similarity /// 16020 // membrane // inferred from electronic annotation /// 16021 // integral to membrane // inferred from electronic annotation /// 5740 // mitochondrial envel…	IPR001993 // Mitochondrial substrate carrier // 6.6E-28 /// IPR001993 // Mitochondrial substrate carrier // 1.2E-25 /// IPR001993 // Mitochondrial substrate carrier // 1.9E-10
5287	146486_at	-0.929698	1.22046	-10.4188	1.01e-11	2.86e-10	16.5028	FBgn0032770	CG13086	CG13086	CG13086	35208	---	---	---	---
5291	146490_at	-1.12718	0.943574	-10.419	1.01e-11	2.86e-10	16.5031	FBgn0053533	CG33533	lectin-37Db	lectin-37Db	3346221	5534 // galactose binding // inferred from sequence or structural similarity /// 5529 // sugar binding // inferred from electronic annotation /// 5534 // galactose binding // inferred from sequence similarity	---	---	IPR001304 // C-type lectin // 4.0E-14
13764	154963_at	-0.867378	2.32095	-10.4151	1.02e-11	2.88e-10	16.4939	FBgn0032783	CG10237	CG10237	CG10237	35222	5386 // carrier activity // inferred from electronic annotation /// 8431 // vitamin E binding // inferred from sequence or structural similarity /// 16918 // retinal binding // inferred from sequence or structural similarity /// 5215 // transporter activity // inferred from electronic annotation /// 8431 // vitamin E binding // inferred from sequence similarity /// 16918 // retinal binding // inf…	6732 // coenzyme metabolism // inferred from electronic annotation /// 6810 // transport // inferred from electronic annotation /// 51189 // prosthetic group metabolism // inferred from electronic annotation	5622 // intracellular // inferred from electronic annotation	IPR001251 // Cellular retinaldehyde-binding)/triple function, C-terminal // 3.3E-36 /// IPR001251 // Cellular retinaldehyde-binding)/triple function, C-terminal // 3.3E-36 /// IPR001251 // Cellular retinaldehyde-binding)/triple function, C-terminal // 3.3E-36
213	141412_at	-0.945138	0.237062	-10.4019	1.05e-11	2.96e-10	16.4623	FBgn0030955	CG6891	CG6891	CG6891	32865	3779 // actin binding // inferred from electronic annotation	---	5622 // intracellular // inferred from electronic annotation	IPR002108 // Actin-binding, cofilin/tropomyosin type // 6.2E-12 /// IPR002108 // Actin-binding, cofilin/tropomyosin type // 6.2E-12
11865	153064_at	-1.58164	4.60333	-10.3961	1.06e-11	2.99e-10	16.4485	FBgn0032055	CG13091	CG13091	CG13091	34188	16491 // oxidoreductase activity // inferred from electronic annotation	---	---	IPR004262 // Male sterility protein // 1.4E-74
11876	153075_at	-1.27296	0.417267	-10.3761	1.11e-11	3.13e-10	16.4006	FBgn0033439	CG1773	CG1773	CG1773	35999	4263 // chymotrypsin activity // inferred from electronic annotation /// 4295 // trypsin activity // inferred from sequence or structural similarity /// 4295 // trypsin activity // non-traceable author statement /// 4252 // serine-type endopeptidase activity // inferred from electronic annotation /// 8233 // peptidase activity // inferred from electronic annotation /// 16787 // hydrolase activity…	6508 // proteolysis // inferred from sequence or structural similarity /// 6508 // proteolysis // non-traceable author statement /// 6508 // proteolysis // inferred from electronic annotation /// 6508 // proteolysis // inferred from sequence similarity	---	IPR001254 // Peptidase S1, chymotrypsin // 5.0E-48
11057	152256_at	-0.744113	0.761075	-10.3414	1.21e-11	3.39e-10	16.3174	FBgn0033289	CG2121	CG2121	CG2121	35814	---	6936 // muscle contraction // inferred from electronic annotation	---	---
3654	144853_at	-1.00033	2.48074	-10.3226	1.27e-11	3.53e-10	16.2724	FBgn0030272	CG15201	CG15201	CG15201	32053	---	---	---	---
12262	153461_at	-0.768658	1.75773	-10.3207	1.27e-11	3.54e-10	16.2679	FBgn0050503	CG30503	CG30503	CG30503	246656	5515 // protein binding // inferred from physical interaction /// 4623 // phospholipase A2 activity // inferred from electronic annotation /// 5509 // calcium ion binding // inferred from electronic annotation /// 166 // nucleotide binding // inferred from electronic annotation /// 5525 // GTP binding // inferred from electronic annotation	6644 // phospholipid metabolism // inferred from electronic annotation /// 7264 // small GTPase mediated signal transduction // inferred from electronic annotation	5576 // extracellular region // inferred from electronic annotation /// 16020 // membrane // inferred from electronic annotation	IPR008774 // A2 Phospholipase // 1.7E-67
12305	153504_at	-0.910598	1.46252	-10.3182	1.28e-11	3.55e-10	16.2618	FBgn0053138	CG33138	CG33138	CG33138	326264	3844 // 1,4-alpha-glucan branching enzyme activity // inferred from sequence or structural similarity /// 4553 // hydrolase activity, hydrolyzing O-glycosyl compounds // inferred from electronic annotation /// 4556 // alpha-amylase activity // inferred from electronic annotation /// 3844 // 1,4-alpha-glucan branching enzyme activity // inferred from sequence similarity	5977 // glycogen metabolism // inferred from electronic annotation /// 5975 // carbohydrate metabolism // inferred from electronic annotation	---	IPR006047 // Alpha amylase, catalytic domain // 1.6E-11 /// IPR004193 // Glycoside hydrolase, family 13, N-terminal // 6.2E-34
2746	143945_at	-1.0411	3.60495	-10.2898	1.37e-11	3.79e-10	16.1936	FBgn0020907	CG14904	Scp2	Sarcoplasmic calcium-binding protein 2	42015	3924 // GTPase activity // inferred from direct assay /// 3924 // GTPase activity // inferred from sequence or structural similarity /// 5509 // calcium ion binding // inferred from sequence or structural similarity /// 5509 // calcium ion binding // non-traceable author statement /// 5515 // protein binding // inferred from physical interaction /// 5509 // calcium ion binding // inferred from el…	---	16529 // sarcoplasmic reticulum // inferred from sequence or structural similarity /// 16529 // sarcoplasmic reticulum // inferred from sequence similarity	IPR002048 // Calcium-binding EF-hand // 0.038 /// IPR002048 // Calcium-binding EF-hand // 0.0011 /// IPR002048 // Calcium-binding EF-hand // 0.05
9058	150257_at	-1.77493	3.23839	-10.2846	1.38e-11	3.83e-10	16.1811	FBgn0038790	CG5097	MtnC	Metallothionein C	42416	46872 // metal ion binding // inferred from electronic annotation	---	---	IPR000966 // Diptera metallothionein, family 5 // 8.7E-17
4044	145243_at	-0.887463	1.64767	-10.2816	1.39e-11	3.84e-10	16.1739	FBgn0030837	CG8661	CG8661	CG8661	32720	---	---	---	---
13597	154796_at	-0.679478	1.96098	-10.2688	1.44e-11	3.95e-10	16.1431	FBgn0037203	CG11128	slif	slimfast	40510	15171 // amino acid transporter activity // non-traceable author statement /// 15326 // cationic amino acid transporter activity // inferred from sequence or structural similarity /// 15326 // cationic amino acid transporter activity // traceable author statement /// 5515 // protein binding // inferred from physical interaction /// 5279 // amino acid-polyamine transporter activity // inferred fro…	6520 // amino acid metabolism // inferred from electronic annotation /// 6865 // amino acid transport // inferred from electronic annotation /// 6865 // amino acid transport // traceable author statement /// 40007 // growth // traceable author statement /// 6810 // transport // inferred from electronic annotation	16020 // membrane // inferred from electronic annotation /// 16021 // integral to membrane // inferred from electronic annotation	IPR004841 // Amino acid permease-associated region // 7.6E-17
1834	143033_at	-0.922252	1.2656	-10.2537	1.49e-11	4.08e-10	16.1068	FBgn0001089	CG9092	Gal	galactosidase	33839	4565 // beta-galactosidase activity // inferred from direct assay /// 4565 // beta-galactosidase activity // inferred from sequence or structural similarity /// 4565 // beta-galactosidase activity // inferred from electronic annotation /// 4565 // beta-galactosidase activity // inferred from sequence similarity	5975 // carbohydrate metabolism // inferred from electronic annotation	5764 // lysosome // inferred from sequence or structural similarity /// 9341 // beta-galactosidase complex // inferred from electronic annotation /// 5764 // lysosome // inferred from sequence similarity	IPR001944 // Glycoside hydrolase, family 35 // 5.1E-100 /// IPR001944 // Glycoside hydrolase, family 35 // 2.3E-8
7149	148348_at	-0.721805	1.68288	-10.2276	1.59e-11	4.32e-10	16.0438	FBgn0035800	CG7716	CG7716	CG7716	38852	5200 // structural constituent of cytoskeleton // inferred from sequence or structural similarity /// 8017 // microtubule binding // inferred from electronic annotation /// 5200 // structural constituent of cytoskeleton // inferred from sequence similarity	7020 // microtubule nucleation // inferred from sequence or structural similarity /// 7067 // mitosis // inferred from electronic annotation /// 226 // microtubule cytoskeleton organization and biogenesis // inferred from electronic annotation /// 7020 // microtubule nucleation // inferred from sequence similarity	5813 // centrosome // inferred from sequence or structural similarity /// 922 // spindle pole // inferred from electronic annotation /// 5815 // microtubule organizing center // inferred from electronic annotation /// 5813 // centrosome // inferred from sequence similarity	IPR007259 // Spc97/Spc98 // 1.0E-126
11362	152561_at	-0.589186	2.16793	-10.2257	1.59e-11	4.33e-10	16.0392	FBgn0039332	CG11910	CG11910	CG11910	43074	4930 // G-protein coupled receptor activity // inferred from electronic annotation /// 5515 // protein binding // inferred from sequence or structural similarity /// 5515 // protein binding // inferred from sequence similarity	6952 // defense response // inferred from electronic annotation /// 7155 // cell adhesion // inferred from electronic annotation /// 7166 // cell surface receptor linked signal transduction // inferred from electronic annotation	16942 // insulin-like growth factor binding protein complex // inferred from sequence or structural similarity /// 16942 // insulin-like growth factor binding protein complex // inferred from sequence similarity	IPR001611 // Leucine-rich repeat // 0.12 /// IPR001611 // Leucine-rich repeat // 0.0046 /// IPR001611 // Leucine-rich repeat // 0.61 /// IPR001611 // Leucine-rich repeat // 0.77 /// IPR001611 // Leucine-rich repeat // 0.0077 /// IPR001611 // Leucine-rich repeat // 0.04 /// IPR001611 // Leucine-rich repeat // 0.0066
2076	143275_at	-1.36287	6.05744	-10.2245	1.6e-11	4.34e-10	16.0364	FBgn0002863	CG17924	Acp95EF	Accessory gland-specific peptide 95EF	47852	---	---	5576 // extracellular region // non-traceable author statement	---
13045	154244_at	-0.979551	4.40915	-10.2157	1.63e-11	4.42e-10	16.015	FBgn0001091	CG12055	Gapdh1	Glyceraldehyde 3 phosphate dehydrogenase 1	35728	4365 // glyceraldehyde-3-phosphate dehydrogenase (phosphorylating) activity // inferred from direct assay /// 4365 // glyceraldehyde-3-phosphate dehydrogenase (phosphorylating) activity // inferred from sequence or structural similarity /// 4365 // glyceraldehyde-3-phosphate dehydrogenase (phosphorylating) activity // non-traceable author statement /// 4365 // glyceraldehyde-3-phosphate dehydroge…	6096 // glycolysis // inferred from expression pattern /// 6096 // glycolysis // non-traceable author statement /// 6006 // glucose metabolism // inferred from electronic annotation /// 6096 // glycolysis // inferred from electronic annotation	5737 // cytoplasm // non-traceable author statement	IPR000173 // Glyceraldehyde 3-phosphate dehydrogenase // 2.9E-118 /// IPR000173 // Glyceraldehyde 3-phosphate dehydrogenase // 1.0E-126
5370	146569_at	-1.56478	2.37369	-10.2069	1.67e-11	4.51e-10	15.9938	FBgn0032913	CG9259	CG9259	CG9259	35372	16301 // kinase activity // inferred from electronic annotation /// 16740 // transferase activity // inferred from electronic annotation	---	---	IPR004119 // Protein of unknown function DUF227 // 1.0E-85
11370	152569_at	-0.931229	2.1324	-10.2061	1.67e-11	4.51e-10	15.9918	FBgn0033564 /// FBgn0061356	CG11919 /// CG18003	CG11919 /// CG18003	CG11919 /// CG18003	3771779 /// 3772165	8891 // glycolate oxidase activity // inferred from sequence or structural similarity /// 166 // nucleotide binding // inferred from electronic annotation /// 5524 // ATP binding // inferred from electronic annotation /// 17111 // nucleoside-triphosphatase activity // inferred from electronic annotation /// 16491 // oxidoreductase activity // inferred from electronic annotation /// 8891 // glycol…	6118 // electron transport // inferred from electronic annotation /// 7031 // peroxisome organization and biogenesis // inferred from sequence or structural similarity /// 7031 // peroxisome organization and biogenesis // inferred from sequence similarity	5777 // peroxisome // inferred from sequence or structural similarity /// 5777 // peroxisome // inferred from sequence similarity	---
9585	150784_at	-0.683239	1.00329	-10.1956	1.71e-11	4.6e-10	15.9664	FBgn0039598	CG14061	CG14061	CG14061	43396	4252 // serine-type endopeptidase activity // inferred from electronic annotation	6508 // proteolysis // inferred from electronic annotation	---	---
5749	146948_at	-0.764443	1.53304	-10.188	1.74e-11	4.68e-10	15.9481	FBgn0033523	CG12895	CG12895	CG12895	36103	---	---	---	IPR005631 // Protein of unknown function DUF339 // 2.9E-42
2974	144173_at	-0.64358	2.25942	-10.1472	1.92e-11	5.14e-10	15.8493	FBgn0027106	CG2977	inx7	innexin 7	33027	5243 // gap-junction forming channel activity // inferred from sequence or structural similarity /// 15286 // innexin channel activity // non-traceable author statement /// 5515 // protein binding // inferred from physical interaction /// 15286 // innexin channel activity // inferred from expression pattern /// 5243 // gap-junction forming channel activity // inferred from sequence similarity	7165 // signal transduction // inferred from electronic annotation /// 381 // regulation of alternative nuclear mRNA splicing, via spliceosome // inferred from mutant phenotype /// 6727 // ommochrome biosynthesis // inferred from mutant phenotype /// 6810 // transport // inferred from electronic annotation /// 6886 // intracellular protein transport // inferred from electronic annotation /// 6901…	5921 // gap junction // inferred from sequence or structural similarity /// 5921 // gap junction // non-traceable author statement /// 16021 // integral to membrane // non-traceable author statement /// 5921 // gap junction // inferred from expression pattern /// 30125 // clathrin vesicle coat // inferred from electronic annotation /// 5921 // gap junction // inferred from electronic annotation /…	IPR000990 // Innexin // 6.9E-14 /// IPR000990 // Innexin // 9.7E-23 /// IPR000990 // Innexin // 4.4E-27 /// IPR000990 // Innexin // 9.7E-23
12679	153878_at	-0.721867	2.22255	-10.1372	1.97e-11	5.25e-10	15.825	FBgn0003429	CG10693	slo	slowpoke	42940	5249 // voltage-gated potassium channel activity // inferred from electronic annotation /// 5515 // protein binding // inferred from physical interaction /// 15269 // calcium-activated potassium channel activity // inferred from direct assay /// 15269 // calcium-activated potassium channel activity // non-traceable author statement /// 5216 // ion channel activity // inferred from electronic anno…	6813 // potassium ion transport // inferred from direct assay /// 6813 // potassium ion transport // non-traceable author statement /// 7268 // synaptic transmission // inferred from electronic annotation /// 7623 // circadian rhythm // inferred from mutant phenotype /// 42493 // response to drug // inferred from mutant phenotype /// 45433 // male courtship behavior (sensu Insecta), song producti…	5886 // plasma membrane // non-traceable author statement /// 8076 // voltage-gated potassium channel complex // inferred from electronic annotation /// 16020 // membrane // inferred from electronic annotation /// 16021 // integral to membrane // inferred from electronic annotation	IPR005821 // Ion transport protein // 5.4E-22 /// IPR003929 // Calcium-activated BK potassium channel, alpha subunit // 1.0E-126 /// IPR003929 // Calcium-activated BK potassium channel, alpha subunit // 1.0E-126 /// IPR005821 // Ion transport protein // 1.3E-22 /// IPR005821 // Ion transport protein // 5.4E-22 /// IPR003929 // Calcium-activated BK potassium channel, alpha subunit // 1.0E-126 /// …
611	141810_at	-1.38275	6.37616	-10.1305	2e-11	5.32e-10	15.809	FBgn0010352	CG11661	Nc73EF	Neural conserved at 73EF	39899	4591 // oxoglutarate dehydrogenase (succinyl-transferring) activity // inferred from sequence or structural similarity /// 4591 // oxoglutarate dehydrogenase (succinyl-transferring) activity // inferred from electronic annotation /// 16624 // oxidoreductase activity, acting on the aldehyde or oxo group of donors, disulfide as acceptor // inferred from electronic annotation /// 30976 // thiamin py…	6099 // tricarboxylic acid cycle // inferred from sequence or structural similarity /// 6096 // glycolysis // inferred from electronic annotation /// 8152 // metabolism // inferred from electronic annotation /// 6099 // tricarboxylic acid cycle // inferred from sequence similarity	9353 // oxoglutarate dehydrogenase complex (sensu Eukaryota) // inferred from sequence or structural similarity /// 9353 // oxoglutarate dehydrogenase complex (sensu Eukaryota) // inferred from sequence similarity	IPR005475 // Transketolase, central region // 7.4E-67 /// IPR001017 // Dehydrogenase, E1 component // 3.3E-112 /// IPR001017 // Dehydrogenase, E1 component // 1.9E-96 /// IPR005475 // Transketolase, central region // 7.4E-67 /// IPR005475 // Transketolase, central region // 7.4E-67 /// IPR001017 // Dehydrogenase, E1 component // 3.3E-112
13613	154812_at	-0.733924	2.19346	-10.102	2.14e-11	5.65e-10	15.7398	FBgn0003162	CG9441	Pu	Punch	37415	3934 // GTP cyclohydrolase I activity // inferred from sequence or structural similarity /// 3934 // GTP cyclohydrolase I activity // non-traceable author statement /// 42802 // identical protein binding // inferred from physical interaction /// 3824 // catalytic activity // inferred from electronic annotation /// 3934 // GTP cyclohydrolase I activity // inferred from electronic annotation /// 16…	6144 // purine base metabolism // inferred from electronic annotation /// 6727 // ommochrome biosynthesis // inferred from mutant phenotype /// 6729 // tetrahydrobiopterin biosynthesis // non-traceable author statement /// 6729 // tetrahydrobiopterin biosynthesis // inferred from electronic annotation /// 9058 // biosynthesis // inferred from electronic annotation	---	IPR001474 // GTP cyclohydrolase I // 7.2E-59 /// IPR001474 // GTP cyclohydrolase I // 7.2E-59 /// IPR001474 // GTP cyclohydrolase I // 7.2E-59
4281	145480_at	-0.891011	0.871207	-10.0973	2.17e-11	5.7e-10	15.7283	FBgn0031182	CG1644	Cyp6t1	Cyp6t1	33127	4497 // monooxygenase activity // inferred from electronic annotation /// 16491 // oxidoreductase activity // inferred from electronic annotation /// 5506 // iron ion binding // inferred from electronic annotation /// 20037 // heme binding // inferred from electronic annotation /// 46872 // metal ion binding // inferred from electronic annotation	6118 // electron transport // inferred from electronic annotation	5792 // microsome // non-traceable author statement /// 16020 // membrane // non-traceable author statement /// 5783 // endoplasmic reticulum // inferred from electronic annotation /// 5792 // microsome // inferred from electronic annotation /// 16020 // membrane // inferred from electronic annotation	IPR001128 // Cytochrome P450 // 1.1E-66
11720	152919_at	-0.702689	3.39562	-10.093	2.19e-11	5.74e-10	15.7177	FBgn0031228 /// FBgn0031229	CG11455	CG11455 /// CG3436	CG11455 /// CG3436	33179 /// 33180	3954 // NADH dehydrogenase activity // inferred from sequence or structural similarity /// 5515 // protein binding // inferred from physical interaction /// 3954 // NADH dehydrogenase activity // inferred from sequence similarity	6120 // mitochondrial electron transport, NADH to ubiquinone // inferred from sequence or structural similarity /// 398 // nuclear mRNA splicing, via spliceosome // inferred from sequence similarity /// 6120 // mitochondrial electron transport, NADH to ubiquinone // inferred from sequence similarity	5747 // respiratory chain complex I (sensu Eukaryota) // inferred from sequence or structural similarity /// 5682 // snRNP U5 // inferred from sequence similarity /// 30532 // small nuclear ribonucleoprotein complex // inferred from sequence similarity /// 5747 // respiratory chain complex I (sensu Eukaryota) // inferred from sequence similarity	---
5187	146386_at	-0.71799	1.60306	-10.0844	2.23e-11	5.84e-10	15.6969	FBgn0032614	CG13284	CG13284	CG13284	35021	16229 // steroid dehydrogenase activity // inferred from sequence or structural similarity /// 16491 // oxidoreductase activity // inferred from electronic annotation /// 16229 // steroid dehydrogenase activity // inferred from sequence similarity	8202 // steroid metabolism // inferred from electronic annotation /// 8152 // metabolism // inferred from electronic annotation	---	IPR002198 // Short-chain dehydrogenase/reductase SDR // 1.1E-41 /// IPR002198 // Short-chain dehydrogenase/reductase SDR // 1.1E-41
11108	152307_r_at	-1.87683	4.9581	-10.0816	2.25e-11	5.87e-10	15.6901	FBgn0043825	CG18284	CG18284	CG18284	34460	16298 // lipase activity // inferred from electronic annotation /// 16298 // lipase activity // inferred from sequence or structural similarity /// 16787 // hydrolase activity // inferred from electronic annotation /// 3824 // catalytic activity // inferred from electronic annotation /// 16789 // carboxylic ester hydrolase activity // inferred from electronic annotation /// 16298 // lipase activi…	6629 // lipid metabolism // inferred from electronic annotation /// 6629 // lipid metabolism // inferred from sequence or structural similarity /// 16042 // lipid catabolism // inferred from electronic annotation /// 6629 // lipid metabolism // inferred from sequence similarity	---	IPR006693 // Ab-hydrolase associated lipase region // 1.3E-23
6235	147434_at	-0.952233	0.67949	-10.0517	2.42e-11	6.23e-10	15.6173	FBgn0063499	CG17522	GstE10	Glutathione S transferase E10	37105	4364 // glutathione transferase activity // inferred from sequence or structural similarity /// 5515 // protein binding // inferred from physical interaction /// 16740 // transferase activity // inferred from electronic annotation /// 4364 // glutathione transferase activity // inferred from sequence similarity	6952 // defense response // inferred from electronic annotation /// 9636 // response to toxin // inferred from electronic annotation	---	IPR004046 // Glutathione S-transferase, C-terminal // 1.1E-10 /// IPR004045 // Glutathione S-transferase, N-terminal // 6.6E-17
1007	142206_s_at	-1.29813	1.64324	-10.0357	2.51e-11	6.46e-10	15.5783	FBgn0027578 /// FBgn0039613	CG14527 /// CG14526	CG14526 /// CG14527	CG14526 /// CG14527	43412 /// 43413	4222 // metalloendopeptidase activity // inferred from sequence or structural similarity /// 4245 // neprilysin activity // inferred from electronic annotation /// 8270 // zinc ion binding // inferred from electronic annotation /// 16511 // endothelin-converting enzyme activity // inferred from sequence or structural similarity /// 8233 // peptidase activity // inferred from electronic annotation…	6508 // proteolysis // inferred from electronic annotation /// 7165 // signal transduction // inferred from electronic annotation	16020 // membrane // inferred from electronic annotation	IPR008753 // Peptidase M13 // 8.0E-12 /// IPR008753 // Peptidase M13 // 7.5E-5 /// IPR000718 // Peptidase M13, neprilysin // 1.3E-45 /// IPR008753 // Peptidase M13 // 9.3E-10 /// IPR000718 // Peptidase M13, neprilysin // 2.0E-46
12119	153318_at	-1.16566	3.23001	-10.031	2.54e-11	6.52e-10	15.5668	FBgn0027348	CG4501	bgm	bubblegum	44117	4467 // long-chain-fatty-acid-CoA ligase activity // inferred from sequence or structural similarity /// 3824 // catalytic activity // inferred from electronic annotation /// 4467 // long-chain-fatty-acid-CoA ligase activity // inferred from sequence similarity	6631 // fatty acid metabolism // inferred from electronic annotation /// 8152 // metabolism // inferred from electronic annotation	---	IPR000873 // AMP-dependent synthetase and ligase // 1.5E-79
2348	143547_at	-0.953034	3.90663	-9.99083	2.8e-11	7.09e-10	15.4688	FBgn0005585	CG9429	Crc	Calreticulin	41166	5509 // calcium ion binding // inferred from sequence or structural similarity /// 5509 // calcium ion binding // non-traceable author statement /// 51082 // unfolded protein binding // inferred from electronic annotation /// 5509 // calcium ion binding // inferred from electronic annotation /// 5529 // sugar binding // inferred from electronic annotation /// 8270 // zinc ion binding // inferred …	6457 // protein folding // inferred from electronic annotation /// 6886 // intracellular protein transport // inferred from electronic annotation /// 6887 // exocytosis // inferred from electronic annotation /// 7417 // central nervous system development // inferred from mutant phenotype /// 7422 // peripheral nervous system development // traceable author statement /// 42048 // olfactory behavio…	5788 // endoplasmic reticulum lumen // inferred from sequence or structural similarity /// 5788 // endoplasmic reticulum lumen // non-traceable author statement /// 16020 // membrane // inferred from electronic annotation /// 16021 // integral to membrane // inferred from electronic annotation /// 5783 // endoplasmic reticulum // inferred from electronic annotation /// 5788 // endoplasmic reticul…	IPR001580 // Calreticulin/calnexin // 1.0E-126
6466	147665_at	-1.46875	2.05608	-9.96928	2.95e-11	7.45e-10	15.4161	FBgn0034711	CG3290	CG3290	CG3290	37539	4035 // alkaline phosphatase activity // inferred from sequence or structural similarity /// 19204 // nucleotide phosphatase activity // inferred from electronic annotation /// 287 // magnesium ion binding // inferred from electronic annotation /// 8270 // zinc ion binding // inferred from electronic annotation /// 16787 // hydrolase activity // inferred from electronic annotation /// 4035 // alk…	1501 // skeletal development // inferred from electronic annotation /// 7498 // mesoderm development // inferred from electronic annotation /// 8152 // metabolism // inferred from electronic annotation	---	IPR001952 // Alkaline phosphatase // 8.0E-84
4408	145607_at	-0.760833	1.84212	-9.95737	3.04e-11	7.59e-10	15.387	FBgn0031372	CG7295	CG7295	CG7295	33365	---	---	---	---
10582	151781_at	-2.11896	3.71164	-9.93919	3.17e-11	7.91e-10	15.3424	FBgn0039342	CG5107	CG5107	CG5107	43084	5515 // protein binding // inferred from physical interaction	---	---	---
3034	144233_at	-2.15259	6.08532	-9.93573	3.2e-11	7.95e-10	15.3339	FBgn0028536 /// FBgn0038971	CG15281	CG15281 /// CG13845	CG15281 /// CG13845	34855 /// 42640	---	---	---	IPR007588 // FLYWCH Zn-finger // 1.1E-25
9694	150893_f_at	-1.83021	4.23988	-9.93549	3.2e-11	7.95e-10	15.3334	FBgn0039778 /// FBgn0039777	CG2229 /// CG18030	Jon99Fi /// Jon99Fii	Jonah 99Fi /// Jonah 99Fii	43621 /// 43622	4252 // serine-type endopeptidase activity // inferred from sequence or structural similarity /// 4263 // chymotrypsin activity // inferred from electronic annotation /// 4295 // trypsin activity // inferred from electronic annotation /// 42708 // elastase activity // non-traceable author statement /// 3700 // transcription factor activity // inferred from mutant phenotype /// 4252 // serine-type…	6508 // proteolysis // non-traceable author statement /// 2168 // larval development (sensu Insecta) // inferred from mutant phenotype /// 7591 // molting cycle (sensu Insecta) // inferred from mutant phenotype /// 6508 // proteolysis // inferred from electronic annotation	5634 // nucleus // inferred from direct assay	IPR001254 // Peptidase S1, chymotrypsin // 8.0E-56 /// IPR001254 // Peptidase S1, chymotrypsin // 3.7E-55
13232	154431_at	-0.959102	3.21841	-9.93176	3.23e-11	8.01e-10	15.3242	FBgn0016122	CG10593	Acer	Angiotensin-converting enzyme-related	34189	4246 // peptidyl-dipeptidase A activity // inferred from sequence or structural similarity /// 4246 // peptidyl-dipeptidase A activity // non-traceable author statement /// 4246 // peptidyl-dipeptidase A activity // traceable author statement /// 8270 // zinc ion binding // inferred from electronic annotation /// 5515 // protein binding // inferred from physical interaction /// 4180 // carboxypep…	6508 // proteolysis // inferred from electronic annotation /// 7507 // heart development // inferred from mutant phenotype /// 6508 // proteolysis // traceable author statement	16020 // membrane // inferred from electronic annotation /// 5576 // extracellular region // inferred from direct assay	IPR001548 // Peptidase M2, peptidyl-dipeptidase A // 1.0E-126
9	141208_at	-1.49848	4.49353	-9.92724	3.27e-11	8.08e-10	15.3131	FBgn0015623	CG11567	Cpr	Cytochrome P450 reductase	33883	3958 // NADPH-hemoprotein reductase activity // inferred from sequence or structural similarity /// 3958 // NADPH-hemoprotein reductase activity // non-traceable author statement /// 10181 // FMN binding // inferred from electronic annotation /// 3958 // NADPH-hemoprotein reductase activity // inferred from electronic annotation /// 16491 // oxidoreductase activity // inferred from electronic ann…	6118 // electron transport // non-traceable author statement /// 6118 // electron transport // inferred from electronic annotation	5783 // endoplasmic reticulum // non-traceable author statement /// 5783 // endoplasmic reticulum // inferred from electronic annotation /// 16020 // membrane // inferred from electronic annotation	IPR008254 // Flavodoxin/nitric oxide synthase // 5.8E-43 /// IPR001433 // Oxidoreductase FAD/NAD(P)-binding // 1.2E-40 /// IPR003097 // FAD-binding // 1.0E-126 /// IPR008254 // Flavodoxin/nitric oxide synthase // 9.9E-18 /// IPR001433 // Oxidoreductase FAD/NAD(P)-binding // 1.2E-40 /// IPR003097 // FAD-binding // 1.0E-126
4963	146162_at	-0.809705	1.96553	-9.90869	3.42e-11	8.44e-10	15.2676	FBgn0032253	CG5322	CG5322	CG5322	34436	4559 // alpha-mannosidase activity // inferred from sequence or structural similarity /// 16799 // hydrolase activity, hydrolyzing N-glycosyl compounds // inferred from electronic annotation /// 4559 // alpha-mannosidase activity // inferred from sequence similarity	5975 // carbohydrate metabolism // inferred from electronic annotation	5764 // lysosome // inferred from sequence or structural similarity /// 5764 // lysosome // inferred from sequence similarity	IPR000602 // Glycoside hydrolase, family 38 // 1.0E-126
5327	146526_at	-2.00381	3.91334	-9.88619	3.61e-11	8.87e-10	15.2124	FBgn0032836	CG10680	CG10680	CG10680	35282	---	---	---	---
9996	151195_i_at	-0.693782	1.71436	-9.86478	3.8e-11	9.28e-10	15.1597	FBgn0040718	CG15353	CG15353	CG15353	50191	---	---	---	---
6762	147961_at	-0.727109	0.956282	-9.84532	3.98e-11	9.66e-10	15.1118	FBgn0053966	---	CG33966	CG33966	3885642	---	---	---	---
4904	146103_at	-1.36701	2.63932	-9.83955	4.04e-11	9.78e-10	15.0976	FBgn0032144	CG17633	CG17633	CG17633	34297	4182 // carboxypeptidase A activity // inferred from sequence or structural similarity /// 4180 // carboxypeptidase activity // inferred from electronic annotation /// 4182 // carboxypeptidase A activity // inferred from electronic annotation /// 4182 // carboxypeptidase A activity // inferred from sequence similarity	6508 // proteolysis // inferred from electronic annotation	---	IPR000834 // Peptidase M14, carboxypeptidase A // 3.8E-83
2947	144146_at	-1.18201	4.35943	-9.8357	4.08e-11	9.82e-10	15.0881	FBgn0026439	CG3747	Eaat1	Excitatory amino acid transporter 1	34251	5313 // L-glutamate transporter activity // inferred from direct assay /// 8324 // cation transporter activity // inferred from electronic annotation /// 15501 // glutamate:sodium symporter activity // inferred from sequence or structural similarity /// 15501 // glutamate:sodium symporter activity // non-traceable author statement /// 17153 // sodium:dicarboxylate symporter activity // inferred f…	6520 // amino acid metabolism // inferred from electronic annotation /// 6812 // cation transport // inferred from electronic annotation /// 6835 // dicarboxylic acid transport // inferred from electronic annotation /// 6865 // amino acid transport // inferred from electronic annotation	5886 // plasma membrane // inferred from sequence or structural similarity /// 16020 // membrane // inferred from electronic annotation /// 5886 // plasma membrane // inferred from sequence similarity	IPR001991 // Sodium:dicarboxylate symporter // 1.0E-126
9498	150697_at	-0.812367	1.81683	-9.82865	4.15e-11	9.97e-10	15.0707	FBgn0051075	CG31075	CG31075	CG31075	43244	4029 // aldehyde dehydrogenase (NAD) activity // inferred from sequence or structural similarity /// 4029 // aldehyde dehydrogenase (NAD) activity // inferred from sequence similarity	6090 // pyruvate metabolism // inferred from sequence or structural similarity /// 9063 // amino acid catabolism // inferred from electronic annotation /// 6090 // pyruvate metabolism // inferred from sequence similarity	5739 // mitochondrion // inferred from sequence or structural similarity /// 5759 // mitochondrial matrix // inferred from sequence or structural similarity /// 5739 // mitochondrion // inferred from sequence similarity /// 5759 // mitochondrial matrix // inferred from sequence similarity	IPR002086 // Aldehyde dehydrogenase // 1.0E-126
1295	142494_at	-1.37161	6.35489	-9.82732	4.16e-11	9.99e-10	15.0675	FBgn0003360	CG16944	sesB	stress-sensitive B	32007	5386 // carrier activity // inferred from sequence or structural similarity /// 5471 // ATP:ADP antiporter activity // inferred from mutant phenotype /// 5471 // ATP:ADP antiporter activity // inferred from sequence or structural similarity /// 5471 // ATP:ADP antiporter activity // non-traceable author statement /// 5488 // binding // inferred from electronic annotation /// 5215 // transporter a…	6139 // nucleobase, nucleoside, nucleotide and nucleic acid metabolism // inferred from electronic annotation /// 6812 // cation transport // inferred from electronic annotation /// 7629 // flight behavior // inferred from mutant phenotype /// 9612 // response to mechanical stimulus // inferred from mutant phenotype /// 15866 // ADP transport // inferred from sequence or structural similarity ///…	5740 // mitochondrial envelope // inferred from sequence or structural similarity /// 5743 // mitochondrial inner membrane // inferred from sequence or structural similarity /// 5743 // mitochondrial inner membrane // non-traceable author statement /// 16021 // integral to membrane // non-traceable author statement /// 5743 // mitochondrial inner membrane // inferred from expression pattern /// 5…	IPR001993 // Mitochondrial substrate carrier // 1.3E-37 /// IPR001993 // Mitochondrial substrate carrier // 5.1E-31 /// IPR001993 // Mitochondrial substrate carrier // 1.4E-14 /// IPR001993 // Mitochondrial substrate carrier // 6.4E-39 /// IPR001993 // Mitochondrial substrate carrier // 3.3E-32 /// IPR001993 // Mitochondrial substrate carrier // 2.3E-19 /// IPR001993 // Mitochondrial substrate ca…
6557	147756_at	-0.840404	0.986895	-9.8157	4.28e-11	1.03e-09	15.0388	FBgn0040063	CG13549	yip3	yippee interacting protein 3	37683	4175 // endopeptidase activity // inferred from electronic annotation /// 4298 // threonine endopeptidase activity // inferred from electronic annotation	6511 // ubiquitin-dependent protein catabolism // inferred from electronic annotation	5839 // proteasome core complex (sensu Eukaryota) // inferred from electronic annotation	---
5919	147118_at	-1.43657	3.41103	-9.80307	4.42e-11	1.05e-09	15.0076	FBgn0033774	CG12374	CG12374	CG12374	36410	4182 // carboxypeptidase A activity // inferred from sequence or structural similarity /// 5515 // protein binding // inferred from physical interaction /// 4180 // carboxypeptidase activity // inferred from electronic annotation /// 4182 // carboxypeptidase A activity // inferred from electronic annotation /// 4182 // carboxypeptidase A activity // inferred from sequence similarity	6508 // proteolysis // inferred from electronic annotation	---	IPR000834 // Peptidase M14, carboxypeptidase A // 4.3E-52
5627	146826_at	-0.949401	0.190411	-9.79683	4.48e-11	1.07e-09	14.9922	FBgn0001285	CG8579	Jon44E	Jonah 44E	35853	4263 // chymotrypsin activity // inferred from sequence or structural similarity /// 4263 // chymotrypsin activity // non-traceable author statement /// 4295 // trypsin activity // inferred from electronic annotation /// 4252 // serine-type endopeptidase activity // inferred from electronic annotation /// 8233 // peptidase activity // inferred from electronic annotation /// 16787 // hydrolase act…	6508 // proteolysis // non-traceable author statement /// 6508 // proteolysis // inferred from electronic annotation	---	IPR001254 // Peptidase S1, chymotrypsin // 2.0E-64
7638	148837_at	-0.673923	1.00961	-9.78683	4.6e-11	1.09e-09	14.9675	FBgn0036551	CG17029	CG17029	CG17029	39740	8934 // inositol-1(or 4)-monophosphatase activity // inferred from sequence or structural similarity /// 8934 // inositol-1(or 4)-monophosphatase activity // non-traceable author statement /// 4437 // inositol or phosphatidylinositol phosphatase activity // inferred from electronic annotation /// 8934 // inositol-1(or 4)-monophosphatase activity // inferred from sequence similarity	6644 // phospholipid metabolism // inferred from electronic annotation /// 7242 // intracellular signaling cascade // inferred from electronic annotation /// 16311 // dephosphorylation // non-traceable author statement	---	IPR000760 // Inositol monophosphatase // 7.1E-104
11126	152325_at	-1.66972	2.1595	-9.76731	4.82e-11	1.14e-09	14.9193	FBgn0039114	CG10374	Lsd-1	Lipid storage droplet-1	42810	5515 // protein binding // inferred from physical interaction /// 5319 // lipid transporter activity // inferred from expression pattern	19915 // sequestering of lipid // non-traceable author statement /// 6869 // lipid transport // inferred from expression pattern /// 19915 // sequestering of lipid // inferred from expression pattern /// 6810 // transport // inferred from electronic annotation /// 6869 // lipid transport // inferred from electronic annotation	5811 // lipid particle // inferred from direct assay	IPR004279 // Perilipin // 1.0E-126 /// IPR004279 // Perilipin // 1.3E-16 /// IPR004279 // Perilipin // 1.0E-126 /// IPR004279 // Perilipin // 1.3E-16 /// IPR004279 // Perilipin // 3.9E-109 /// IPR004279 // Perilipin // 1.3E-16
7960	149159_at	-0.807522	0.577208	-9.75021	5.03e-11	1.18e-09	14.8769	FBgn0053287	CG33287	CG33287	CG33287	2768986	---	---	---	---
10191	151390_at	-0.595923	1.53192	-9.72359	5.36e-11	1.25e-09	14.811	FBgn0052736	CG32736	CG32736	CG32736	50395	5515 // protein binding // inferred from physical interaction	---	---	---
9007	150206_at	-1.49075	2.04294	-9.71525	5.48e-11	1.28e-09	14.7903	FBgn0038718	CG17752	CG17752	CG17752	42337	8513 // organic cation porter activity // inferred from sequence or structural similarity /// 15144 // carbohydrate transporter activity // inferred from electronic annotation /// 5215 // transporter activity // inferred from electronic annotation /// 8513 // organic cation porter activity // inferred from sequence similarity	6812 // cation transport // inferred from electronic annotation /// 6858 // extracellular transport // inferred from electronic annotation /// 6810 // transport // inferred from electronic annotation	16021 // integral to membrane // inferred from electronic annotation /// 16020 // membrane // inferred from electronic annotation	IPR005828 // General substrate transporter // 2.8E-10
11368	152567_at	-0.919011	1.55536	-9.70536	5.61e-11	1.3e-09	14.7658	FBgn0031929	CG18585	CG18585	CG18585	34041	4180 // carboxypeptidase activity // inferred from electronic annotation /// 4182 // carboxypeptidase A activity // inferred from electronic annotation /// 8233 // peptidase activity // inferred from electronic annotation /// 8237 // metallopeptidase activity // inferred from electronic annotation	6508 // proteolysis // inferred from electronic annotation /// 19538 // protein metabolism // inferred from electronic annotation	---	IPR000834 // Peptidase M14, carboxypeptidase A // 6.1E-78 /// IPR003146 // Peptidase M14A, carboxypeptidase activation peptide // 2.5E-8 /// IPR000834 // Peptidase M14, carboxypeptidase A // 6.1E-78 /// IPR003146 // Peptidase M14A, carboxypeptidase activation peptide // 6.0E-6
6380	147579_at	-0.517716	0.511842	-9.69963	5.69e-11	1.32e-09	14.7516	FBgn0034554	CG15227	CG15227	CG15227	37359	4089 // carbonate dehydratase activity // inferred from sequence or structural similarity /// 8270 // zinc ion binding // inferred from electronic annotation /// 4089 // carbonate dehydratase activity // inferred from sequence similarity	6730 // one-carbon compound metabolism // inferred from electronic annotation	---	---
13582	154781_at	-0.751383	1.57245	-9.69233	5.79e-11	1.34e-09	14.7334	FBgn0043792	CG30427	CG30427	CG30427	37986	16491 // oxidoreductase activity // inferred from electronic annotation	---	---	IPR004262 // Male sterility protein // 5.6E-100
8923	150122_at	-0.71265	0.877098	-9.69036	5.82e-11	1.35e-09	14.7285	FBgn0038589	CG18598	CG18598	CG18598	42188	---	---	---	---
1121	142320_at	-0.761293	0.0551049	-9.67963	5.98e-11	1.38e-09	14.7019	FBgn0026268	CG1386	antdh	antdh	32058	4090 // carbonyl reductase (NADPH) activity // inferred from sequence or structural similarity /// 16491 // oxidoreductase activity // inferred from electronic annotation /// 4090 // carbonyl reductase (NADPH) activity // inferred from sequence similarity	8152 // metabolism // inferred from electronic annotation	---	IPR002198 // Short-chain dehydrogenase/reductase SDR // 6.3E-42 /// IPR002198 // Short-chain dehydrogenase/reductase SDR // 1.6E-39
4072	145271_at	-0.77268	1.70615	-9.67958	5.98e-11	1.38e-09	14.7018	FBgn0003380	CG12348	Sh	Shaker	32780	5249 // voltage-gated potassium channel activity // inferred from sequence or structural similarity /// 5249 // voltage-gated potassium channel activity // non-traceable author statement /// 5249 // voltage-gated potassium channel activity // traceable author statement /// 5515 // protein binding // inferred from electronic annotation /// 5216 // ion channel activity // inferred from electronic a…	6813 // potassium ion transport // non-traceable author statement /// 6813 // potassium ion transport // traceable author statement /// 7611 // learning and/or memory // non-traceable author statement /// 7619 // courtship behavior // non-traceable author statement /// 7619 // courtship behavior // traceable author statement /// 7629 // flight behavior // inferred from mutant phenotype /// 30431 …	8076 // voltage-gated potassium channel complex // non-traceable author statement /// 8076 // voltage-gated potassium channel complex // traceable author statement /// 16021 // integral to membrane // non-traceable author statement /// 8076 // voltage-gated potassium channel complex // inferred from electronic annotation /// 16020 // membrane // inferred from electronic annotation /// 16021 // in…	IPR005821 // Ion transport protein // 2.5E-53 /// IPR003131 // K+ channel tetramerisation // 5.6E-50 /// IPR005821 // Ion transport protein // 2.5E-53 /// IPR003131 // K+ channel tetramerisation // 5.6E-50
3599	144798_at	-0.559382	0.501706	-9.65621	6.33e-11	1.45e-09	14.6437	FBgn0030200	CG2885	RabX2	RabX2	31971	3677 // DNA binding // inferred from electronic annotation /// 3924 // GTPase activity // inferred from sequence or structural similarity /// 5525 // GTP binding // inferred from electronic annotation /// 3924 // GTPase activity // inferred from sequence similarity	160 // two-component signal transduction system (phosphorelay) // inferred from electronic annotation /// 6355 // regulation of transcription, DNA-dependent // inferred from electronic annotation /// 6886 // intracellular protein transport // inferred from electronic annotation /// 6897 // endocytosis // inferred from electronic annotation /// 7264 // small GTPase mediated signal transduction // …	---	IPR001806 // Ras GTPase superfamily // 9.1E-62
348	141547_at	-0.857216	1.48321	-9.6395	6.6e-11	1.51e-09	14.6021	FBgn0004057	CG12529	Zw	Zwischenferment	32974	4345 // glucose-6-phosphate 1-dehydrogenase activity // inferred from sequence or structural similarity /// 4345 // glucose-6-phosphate 1-dehydrogenase activity // traceable author statement /// 5515 // protein binding // inferred from physical interaction /// 4345 // glucose-6-phosphate 1-dehydrogenase activity // inferred from electronic annotation /// 16491 // oxidoreductase activity // inferr…	6098 // pentose-phosphate shunt // non-traceable author statement /// 5975 // carbohydrate metabolism // inferred from electronic annotation /// 6006 // glucose metabolism // inferred from electronic annotation	---	IPR001282 // Glucose-6-phosphate dehydrogenase // 1.0E-126 /// IPR001282 // Glucose-6-phosphate dehydrogenase // 1.0E-126 /// IPR001282 // Glucose-6-phosphate dehydrogenase // 1.0E-126 /// IPR001282 // Glucose-6-phosphate dehydrogenase // 1.0E-126
3111	144310_at	-1.87891	2.9726	-9.63506	6.67e-11	1.52e-09	14.591	FBgn0028920	CG8997	CG8997	CG8997	34799	---	---	---	IPR004272 // Odorant binding protein // 4.9E-35
6315	147514_at	-1.06563	0.76289	-9.63335	6.7e-11	1.53e-09	14.5867	FBgn0034468	CG11797	Obp56a	Odorant-binding protein 56a	37264	5549 // odorant binding // inferred from sequence or structural similarity /// 5549 // odorant binding // non-traceable author statement /// 5515 // protein binding // inferred from physical interaction /// 5549 // odorant binding // inferred from electronic annotation /// 5549 // odorant binding // inferred from sequence similarity	7606 // sensory perception of chemical stimulus // inferred from sequence or structural similarity /// 7608 // sensory perception of smell // inferred from expression pattern /// 19236 // response to pheromone // inferred from sequence or structural similarity /// 42048 // olfactory behavior // inferred from sequence or structural similarity /// 6810 // transport // inferred from electronic annot…	5576 // extracellular region // inferred from sequence or structural similarity /// 5576 // extracellular region // inferred from sequence similarity	IPR006170 // Pheromone/general odorant binding protein, PBP/GOBP // 3.5E-31
9880	151079_at	-1.06266	-0.392158	-9.62598	6.82e-11	1.55e-09	14.5684	FBgn0040591	CG13828	CG13828	CG13828	50064	---	---	---	---
11113	152312_at	-0.901738	1.72787	-9.61837	6.95e-11	1.58e-09	14.5494	FBgn0022160	CG8256	l(2)k05713	lethal (2) k05713	47611	4368 // glycerol-3-phosphate dehydrogenase activity // inferred from sequence or structural similarity /// 5515 // protein binding // inferred from physical interaction /// 4368 // glycerol-3-phosphate dehydrogenase activity // inferred from electronic annotation /// 5509 // calcium ion binding // inferred from electronic annotation /// 16491 // oxidoreductase activity // inferred from electronic…	6071 // glycerol metabolism // inferred from sequence or structural similarity /// 6072 // glycerol-3-phosphate metabolism // inferred from electronic annotation /// 6118 // electron transport // inferred from electronic annotation /// 6071 // glycerol metabolism // inferred from sequence similarity	5739 // mitochondrion // inferred from sequence or structural similarity /// 9331 // glycerol-3-phosphate dehydrogenase complex // inferred from electronic annotation /// 5739 // mitochondrion // inferred from sequence similarity	IPR002048 // Calcium-binding EF-hand // 7.7E-5 /// IPR002048 // Calcium-binding EF-hand // 2.7E-6 /// IPR006076 // FAD dependent oxidoreductase // 1.0E-126
11385	152584_at	-0.610294	3.4045	-9.61652	6.98e-11	1.58e-09	14.5448	FBgn0039697	CG7834	CG7834	CG7834	43515	9055 // electron carrier activity // inferred from sequence or structural similarity /// 16491 // oxidoreductase activity // inferred from electronic annotation /// 9055 // electron carrier activity // inferred from sequence similarity	6118 // electron transport // inferred from electronic annotation /// 6119 // oxidative phosphorylation // inferred from sequence or structural similarity /// 6119 // oxidative phosphorylation // inferred from sequence similarity	17133 // electron transfer flavoprotein complex (sensu Eukaryota) // inferred from sequence or structural similarity /// 17133 // electron transfer flavoprotein complex (sensu Eukaryota) // inferred from sequence similarity	IPR000049 // Electron transfer flavoprotein beta-subunit // 4.8E-108
12691	153890_at	-0.830467	1.87016	-9.57794	7.68e-11	1.72e-09	14.4485	FBgn0003087	CG5052	pim	pimples	34404	5515 // protein binding // inferred from physical interaction	70 // mitotic sister chromatid segregation // inferred from mutant phenotype /// 70 // mitotic sister chromatid segregation // non-traceable author statement /// 70 // mitotic sister chromatid segregation // traceable author statement /// 7443 // Malpighian tubule morphogenesis // inferred from mutant phenotype	5737 // cytoplasm // inferred from direct assay	---
128	141327_at	-0.794586	0.825292	-9.57184	7.79e-11	1.75e-09	14.4333	FBgn0038135	CG8773	CG8773	CG8773	41634	4179 // membrane alanyl aminopeptidase activity // inferred from electronic annotation /// 4230 // glutamyl aminopeptidase activity // inferred from sequence or structural similarity /// 8270 // zinc ion binding // inferred from electronic annotation /// 4230 // glutamyl aminopeptidase activity // inferred from sequence similarity	6508 // proteolysis // inferred from electronic annotation	---	IPR001930 // Peptidase M1, membrane alanine aminopeptidase // 1.0E-126
5348	146547_at	-0.758356	3.55068	-9.55003	8.22e-11	1.83e-09	14.3788	FBgn0032868	CG17472	CG17472	CG17472	35320	---	---	---	---
13183	154382_at	-0.52112	2.65696	-9.54329	8.36e-11	1.86e-09	14.3619	FBgn0036353	CG10171	CG10171	CG10171	39501	---	---	---	IPR002794 // Protein of unknown function DUF92 // 1.8E-14 /// IPR002794 // Protein of unknown function DUF92 // 1.8E-14
43	141242_at	-0.996782	1.27341	-9.52304	8.79e-11	1.95e-09	14.3112	FBgn0034388 /// FBgn0054020	CG15092	CG15092 /// CG34020	CG15092 /// CG34020	37164 /// 3885593	5515 // protein binding // inferred from physical interaction	---	---	---
11148	152347_at	-1.10321	2.97396	-9.52081	8.84e-11	1.96e-09	14.3056	FBgn0039628	CG11841	CG11841	CG11841	43430	4252 // serine-type endopeptidase activity // inferred from sequence or structural similarity /// 4263 // chymotrypsin activity // inferred from electronic annotation /// 4295 // trypsin activity // non-traceable author statement /// 4252 // serine-type endopeptidase activity // inferred from electronic annotation /// 4252 // serine-type endopeptidase activity // inferred from sequence similarity	6508 // proteolysis // non-traceable author statement /// 6508 // proteolysis // inferred from electronic annotation	---	IPR001254 // Peptidase S1, chymotrypsin // 2.1E-47 /// IPR001254 // Peptidase S1, chymotrypsin // 3.6E-26
56	141255_at	-0.82852	2.20951	-9.51813	8.9e-11	1.97e-09	14.2989	FBgn0029174	CG4535	FKBP59	FK506-binding protein FKBP59	47762	3755 // peptidyl-prolyl cis-trans isomerase activity // inferred from sequence or structural similarity /// 5515 // protein binding // inferred from physical interaction /// 5528 // FK506 binding // inferred from sequence or structural similarity /// 3755 // peptidyl-prolyl cis-trans isomerase activity // inferred from electronic annotation /// 5488 // binding // inferred from electronic annotati…	6457 // protein folding // inferred from electronic annotation /// 6816 // calcium ion transport // inferred from direct assay /// 7422 // peripheral nervous system development // traceable author statement /// 50908 // detection of light stimulus during visual perception // inferred from physical interaction /// 7601 // visual perception // inferred from electronic annotation /// 50896 // respon…	16027 // inaD signaling complex // inferred from physical interaction	IPR001179 // Peptidylprolyl isomerase, FKBP-type // 6.5E-46 /// IPR001179 // Peptidylprolyl isomerase, FKBP-type // 7.0E-24 /// IPR001440 // TPR repeat // 0.0010 /// IPR001440 // TPR repeat // 0.0012 /// IPR001440 // TPR repeat // 1.9E-9
12138	153337_at	-0.566314	1.16067	-9.50883	9.11e-11	2e-09	14.2756	FBgn0036212	CG11597	CG11597	CG11597	39337	158 // protein phosphatase type 2A activity // inferred from sequence or structural similarity /// 4722 // protein serine/threonine phosphatase activity // non-traceable author statement /// 5506 // iron ion binding // inferred from electronic annotation /// 16787 // hydrolase activity // inferred from electronic annotation /// 158 // protein phosphatase type 2A activity // inferred from sequence…	6470 // protein amino acid dephosphorylation // non-traceable author statement	159 // protein phosphatase type 2A complex // inferred from sequence or structural similarity /// 159 // protein phosphatase type 2A complex // inferred from sequence similarity	IPR004843 // Metallo-phosphoesterase // 1.0E-39
7636	148835_at	-0.883576	0.889854	-9.50085	9.29e-11	2.04e-09	14.2555	FBgn0036549	CG10516	CG10516	CG10516	39738	---	---	---	IPR003877 // SPla/RYanodine receptor SPRY // 3.2E-32
5061	146260_at	-0.824023	1.77403	-9.49352	9.46e-11	2.07e-09	14.2372	FBgn0032385	CG16964	CG16964	CG16964	34605	---	---	---	---
8257	149456_at	-0.493289	0.563365	-9.48446	9.68e-11	2.11e-09	14.2144	FBgn0037516	CG11286	CG11286	CG11286	40919	---	---	---	---
9075	150274_at	-0.993315	2.26459	-9.48451	9.67e-11	2.11e-09	14.2145	FBgn0038820	CG4000	CG4000	CG4000	42451	---	---	---	---
10882	152081_at	-0.584158	2.07458	-9.4664	1.01e-10	2.2e-09	14.1691	FBgn0036760	CG5567	CG5567	CG5567	39986	3869 // 4-nitrophenylphosphatase activity // inferred from sequence or structural similarity /// 3869 // 4-nitrophenylphosphatase activity // inferred from sequence similarity	8152 // metabolism // inferred from electronic annotation	---	IPR005834 // Haloacid dehalogenase-like hydrolase // 2.7E-17
2597	143796_at	-0.626834	0.975602	-9.45662	1.04e-10	2.25e-09	14.1445	FBgn0015316	CG9564	Try29F	Trypsin 29F	34226	4263 // chymotrypsin activity // inferred from electronic annotation /// 4295 // trypsin activity // inferred from sequence or structural similarity /// 4295 // trypsin activity // non-traceable author statement /// 8233 // peptidase activity // inferred from electronic annotation /// 8236 // serine-type peptidase activity // inferred from electronic annotation /// 4252 // serine-type endopeptida…	6508 // proteolysis // non-traceable author statement /// 6508 // proteolysis // inferred from electronic annotation	---	IPR001254 // Peptidase S1, chymotrypsin // 7.3E-89
6085	147284_at	-0.958337	2.981	-9.44762	1.06e-10	2.3e-09	14.1218	FBgn0034082	CG10734	CG10734	CG10734	36787	5515 // protein binding // inferred from physical interaction	---	---	---
11090	152289_at	-0.615656	0.757498	-9.42339	1.13e-10	2.43e-09	14.0609	FBgn0030148	CG3106	CG3106	CG3106	31909	16747 // transferase activity, transferring groups other than amino-acyl groups // inferred from electronic annotation	---	---	IPR002656 // Acyltransferase 3 family // 5.1E-7
5235	146434_at	-0.926501	2.78577	-9.4042	1.18e-10	2.54e-09	14.0125	FBgn0051802	CG31802	CG31802	CG31802	318949	5509 // calcium ion binding // inferred from sequence or structural similarity /// 5516 // calmodulin binding // inferred from electronic annotation /// 5509 // calcium ion binding // inferred from electronic annotation /// 5509 // calcium ion binding // inferred from sequence similarity	7059 // chromosome segregation // inferred from electronic annotation /// 7067 // mitosis // inferred from electronic annotation /// 19722 // calcium-mediated signaling // inferred from electronic annotation	5813 // centrosome // inferred from sequence or structural similarity /// 5856 // cytoskeleton // inferred from sequence or structural similarity /// 5813 // centrosome // inferred from sequence similarity /// 5856 // cytoskeleton // inferred from sequence similarity	IPR002048 // Calcium-binding EF-hand // 1.7E-5 /// IPR002048 // Calcium-binding EF-hand // 5.2E-6 /// IPR002048 // Calcium-binding EF-hand // 0.01 /// IPR002048 // Calcium-binding EF-hand // 1.8E-5
2140	143339_i_at	-1.58825	6.23047	-9.39992	1.19e-10	2.56e-09	14.0017	FBgn0003357	CG31362	Jon99Ciii	Jonah 99Ciii	43543	4252 // serine-type endopeptidase activity // inferred from sequence or structural similarity /// 4252 // serine-type endopeptidase activity // non-traceable author statement /// 4263 // chymotrypsin activity // non-traceable author statement /// 4295 // trypsin activity // inferred from electronic annotation /// 8236 // serine-type peptidase activity // non-traceable author statement /// 4252 //…	6508 // proteolysis // non-traceable author statement /// 7586 // digestion // non-traceable author statement /// 6508 // proteolysis // inferred from electronic annotation	---	IPR001254 // Peptidase S1, chymotrypsin // 1.1E-57
10858	152057_at	-0.762821	1.14089	-9.38928	1.23e-10	2.62e-09	13.9749	FBgn0050431	CG30431	CG30431	CG30431	35549	3676 // nucleic acid binding // inferred from sequence or structural similarity /// 8270 // zinc ion binding // inferred from electronic annotation /// 30528 // transcription regulator activity // inferred from electronic annotation /// 5515 // protein binding // inferred from physical interaction /// 3676 // nucleic acid binding // inferred from electronic annotation /// 46872 // metal ion bindi…	6357 // regulation of transcription from RNA polymerase II promoter // inferred from electronic annotation /// 8283 // cell proliferation // inferred from electronic annotation	5634 // nucleus // inferred from electronic annotation	IPR007087 // Zn-finger, C2H2 type // 3.2E-5 /// IPR007087 // Zn-finger, C2H2 type // 4.5E-5 /// IPR007087 // Zn-finger, C2H2 type // 8.2E-5 /// IPR007087 // Zn-finger, C2H2 type // 8.6E-5
2409	143608_at	-1.22421	3.90659	-9.38823	1.23e-10	2.62e-09	13.9722	FBgn0010387	CG8627	Dbi	Diazepam-binding inhibitor	38784	62 // acyl-CoA binding // inferred from sequence or structural similarity /// 62 // acyl-CoA binding // non-traceable author statement /// 62 // acyl-CoA binding // traceable author statement /// 4857 // enzyme inhibitor activity // inferred from sequence or structural similarity /// 5386 // carrier activity // inferred from electronic annotation /// 50809 // diazepam binding // inferred from seq…	6869 // lipid transport // inferred from electronic annotation /// 42049 // cell acyl-CoA homeostasis // inferred from sequence or structural similarity /// 42049 // cell acyl-CoA homeostasis // non-traceable author statement /// 6810 // transport // inferred from electronic annotation /// 42049 // cell acyl-CoA homeostasis // inferred from sequence similarity	---	IPR000582 // Acyl-coA-binding protein, ACBP // 1.1E-54
1215	142414_at	-0.96885	3.6928	-9.37693	1.26e-10	2.68e-09	13.9437	FBgn0039801	CG11315	CG11315	CG11315	43649	---	---	---	IPR003172 // E1 protein and Def2/Der2 allergen // 3.5E-45 /// IPR003172 // E1 protein and Def2/Der2 allergen // 4.1E-22 /// IPR003172 // E1 protein and Def2/Der2 allergen // 1.1E-5
10938	152137_at	-0.91951	1.6169	-9.3577	1.33e-10	2.8e-09	13.8951	FBgn0039754	CG9747	CG9747	CG9747	43591	4768 // stearoyl-CoA 9-desaturase activity // inferred from electronic annotation /// 5506 // iron ion binding // inferred from electronic annotation /// 17105 // acyl-CoA delta11-desaturase activity // inferred from sequence or structural similarity /// 5515 // protein binding // inferred from physical interaction /// 16491 // oxidoreductase activity // inferred from electronic annotation /// 17…	6631 // fatty acid metabolism // inferred from electronic annotation /// 6633 // fatty acid biosynthesis // inferred from electronic annotation /// 8610 // lipid biosynthesis // inferred from electronic annotation	5783 // endoplasmic reticulum // inferred from electronic annotation /// 16020 // membrane // inferred from electronic annotation /// 16021 // integral to membrane // inferred from electronic annotation	IPR005804 // Fatty acid desaturase // 4.9E-80
5340	146539_at	-0.597069	0.568237	-9.35023	1.35e-10	2.84e-09	13.8762	FBgn0032853	CG10651	CG10651	CG10651	35303	---	6952 // defense response // inferred from electronic annotation	5576 // extracellular region // inferred from electronic annotation	IPR001283 // Allergen V5/Tpx-1 related // 2.2E-24
11771	152970_at	-0.655144	2.56004	-9.33257	1.41e-10	2.96e-09	13.8316	FBgn0010548	CG11140	Aldh-III	Aldehyde dehydrogenase type III	45398	4028 // 3-chloroallyl aldehyde dehydrogenase activity // inferred from sequence or structural similarity /// 4030 // aldehyde dehydrogenase [NAD(P)+] activity // inferred from electronic annotation /// 16491 // oxidoreductase activity // inferred from electronic annotation /// 4028 // 3-chloroallyl aldehyde dehydrogenase activity // inferred from sequence similarity	6952 // defense response // inferred from electronic annotation /// 8152 // metabolism // inferred from electronic annotation /// 9636 // response to toxin // inferred from electronic annotation /// 6081 // aldehyde metabolism // inferred from electronic annotation	---	IPR002086 // Aldehyde dehydrogenase // 3.3E-32 /// IPR002086 // Aldehyde dehydrogenase // 8.4E-8 /// IPR002086 // Aldehyde dehydrogenase // 5.7E-49 /// IPR002086 // Aldehyde dehydrogenase // 1.3E-44 /// IPR002086 // Aldehyde dehydrogenase // 1.3E-44
11870	153069_at	-1.40176	4.34847	-9.3103	1.49e-10	3.11e-09	13.7752	FBgn0034394	CG15096	CG15096	CG15096	37170	5316 // high affinity inorganic phosphate:sodium symporter activity // inferred from sequence or structural similarity /// 5215 // transporter activity // inferred from electronic annotation /// 5316 // high affinity inorganic phosphate:sodium symporter activity // inferred from sequence similarity	5975 // carbohydrate metabolism // inferred from electronic annotation /// 6796 // phosphate metabolism // inferred from electronic annotation /// 6812 // cation transport // inferred from electronic annotation /// 6817 // phosphate transport // inferred from electronic annotation /// 6858 // extracellular transport // inferred from electronic annotation /// 8643 // carbohydrate transport // infe…	16020 // membrane // inferred from electronic annotation /// 16021 // integral to membrane // inferred from electronic annotation	---
5816	147015_at	-0.651277	1.58957	-9.29994	1.53e-10	3.19e-09	13.7489	FBgn0043471	CG12388	Try	Try	36215	4252 // serine-type endopeptidase activity // non-traceable author statement /// 4263 // chymotrypsin activity // inferred from electronic annotation /// 4295 // trypsin activity // inferred from electronic annotation	6508 // proteolysis // inferred from electronic annotation	---	IPR001254 // Peptidase S1, chymotrypsin // 4.3E-67
6237	147436_at	-0.950952	3.40028	-9.29454	1.55e-10	3.22e-09	13.7352	FBgn0068150 /// FBgn0063497	CG17524	DyakGstE3 /// GstE3	GstE3 /// Glutathione S transferase E3	---	---	---	---	IPR004046 // Glutathione S-transferase, C-terminal // 1.9E-11 /// IPR004045 // Glutathione S-transferase, N-terminal // 3.7E-20
3100	144299_at	-0.861813	2.61479	-9.27886	1.62e-10	3.34e-09	13.6955	FBgn0028901	CG18109	CG18109	CG18109	34931	---	---	---	---
2268	143467_f_at	-2.11825	3.06298	-9.26549	1.67e-10	3.45e-09	13.6615	FBgn0004428	CG1180	LysE	Lysozyme E	38128	3796 // lysozyme activity // inferred from sequence or structural similarity /// 3796 // lysozyme activity // non-traceable author statement /// 3796 // lysozyme activity // inferred from electronic annotation /// 3796 // lysozyme activity // inferred from sequence similarity	6960 // antimicrobial humoral response (sensu Protostomia) // non-traceable author statement /// 16998 // cell wall catabolism // inferred from electronic annotation	5576 // extracellular region // inferred from electronic annotation	IPR001916 // Glycoside hydrolase, family 22 // 1.0E-67 /// IPR001916 // Glycoside hydrolase, family 22 // 1.0E-67
10761	151960_at	-0.909958	2.32431	-9.25917	1.7e-10	3.49e-09	13.6455	FBgn0010246	CG9155	Myo61F	Myosin 61F	38153	3774 // motor activity // non-traceable author statement /// 3779 // actin binding // non-traceable author statement /// 5200 // structural constituent of cytoskeleton // inferred from electronic annotation /// 5524 // ATP binding // inferred from electronic annotation /// 42623 // ATPase activity, coupled // inferred from sequence or structural similarity /// 166 // nucleotide binding // inferre…	6886 // intracellular protein transport // inferred from electronic annotation /// 7498 // mesoderm development // inferred from expression pattern /// 7601 // visual perception // inferred from electronic annotation /// 7605 // sensory perception of sound // inferred from electronic annotation /// 16192 // vesicle-mediated transport // inferred from electronic annotation	5737 // cytoplasm // non-traceable author statement /// 16459 // myosin // inferred from sequence or structural similarity /// 16459 // myosin // inferred from electronic annotation /// 16459 // myosin // inferred from sequence similarity	IPR001609 // Myosin head (motor domain) // 1.0E-126 /// IPR000048 // IQ calmodulin-binding region // 2.8E-5 /// IPR010926 // Myosin tail 2 // 1.6E-72 /// IPR001609 // Myosin head (motor domain) // 1.0E-126 /// IPR000048 // IQ calmodulin-binding region // 2.8E-5 /// IPR010926 // Myosin tail 2 // 1.6E-72 /// IPR001609 // Myosin head (motor domain) // 1.0E-126 /// IPR000048 // IQ calmodulin-binding …
8993	150192_at	-0.784309	1.93784	-9.24799	1.75e-10	3.58e-09	13.6171	FBgn0038701	CG18493	CG18493	CG18493	42319	8233 // peptidase activity // inferred from electronic annotation /// 8236 // serine-type peptidase activity // inferred from electronic annotation /// 3824 // catalytic activity // inferred from electronic annotation	6508 // proteolysis // inferred from electronic annotation /// 19538 // protein metabolism // inferred from electronic annotation	5764 // lysosome // inferred from electronic annotation	IPR008758 // Peptidase S28 // 1.0E-126
12832	154031_at	-1.05759	3.40612	-9.24803	1.75e-10	3.58e-09	13.6172	FBgn0013763	CG5210	Chit	Chitinase-like	36868	4568 // chitinase activity // inferred from sequence or structural similarity /// 4568 // chitinase activity // non-traceable author statement /// 8083 // growth factor activity // inferred from electronic annotation /// 16799 // hydrolase activity, hydrolyzing N-glycosyl compounds // inferred from electronic annotation /// 4553 // hydrolase activity, hydrolyzing O-glycosyl compounds // inferred …	6036 // cuticle chitin catabolism // inferred from sequence or structural similarity /// 6036 // cuticle chitin catabolism // non-traceable author statement /// 7165 // signal transduction // inferred from electronic annotation /// 7267 // cell-cell signaling // inferred from electronic annotation /// 5975 // carbohydrate metabolism // inferred from electronic annotation /// 6032 // chitin catabo…	5576 // extracellular region // inferred from direct assay	IPR001223 // Glycoside hydrolase, family 18 // 2.7E-101
13030	154229_at	-0.808488	2.31481	-9.24744	1.75e-10	3.58e-09	13.6157	FBgn0029969	CG10932	CG10932	CG10932	31695	3985 // acetyl-CoA C-acetyltransferase activity // inferred from sequence or structural similarity /// 3985 // acetyl-CoA C-acetyltransferase activity // inferred from sequence similarity	6090 // pyruvate metabolism // inferred from sequence or structural similarity /// 6633 // fatty acid biosynthesis // inferred from sequence or structural similarity /// 6090 // pyruvate metabolism // inferred from sequence similarity /// 6633 // fatty acid biosynthesis // inferred from sequence similarity	5739 // mitochondrion // inferred from sequence or structural similarity /// 5739 // mitochondrion // inferred from sequence similarity	IPR002155 // Thiolase // 2.4E-60 /// IPR002155 // Thiolase // 1.0E-126
6037	147236_at	-0.578205	1.4744	-9.241	1.78e-10	3.63e-09	13.5993	FBgn0034001	CG12954	mRpL41	mitochondrial ribosomal protein L41	36688	3735 // structural constituent of ribosome // inferred from sequence or structural similarity /// 5515 // protein binding // inferred from physical interaction /// 3735 // structural constituent of ribosome // inferred from sequence similarity	6412 // protein biosynthesis // inferred from sequence or structural similarity /// 6412 // protein biosynthesis // inferred from sequence similarity	5762 // mitochondrial large ribosomal subunit // inferred from sequence or structural similarity /// 5762 // mitochondrial large ribosomal subunit // inferred from sequence similarity	---
4312	145511_at	-1.05999	4.73068	-9.24041	1.78e-10	3.63e-09	13.5978	FBgn0025683	CG3164	CG3164	CG3164	33171	166 // nucleotide binding // inferred from electronic annotation /// 5215 // transporter activity // inferred from sequence or structural similarity /// 5524 // ATP binding // inferred from electronic annotation /// 42626 // ATPase activity, coupled to transmembrane movement of substances // inferred from sequence or structural similarity /// 16887 // ATPase activity // inferred from electronic a…	6629 // lipid metabolism // inferred from electronic annotation /// 6869 // lipid transport // inferred from electronic annotation	43190 // ATP-binding cassette (ABC) transporter complex // inferred from sequence or structural similarity /// 43190 // ATP-binding cassette (ABC) transporter complex // inferred from sequence similarity	IPR003439 // ABC transporter // 3.1E-37 /// IPR003439 // ABC transporter // 1.4E-18 /// IPR003439 // ABC transporter // 3.1E-37
2951	144150_at	-0.657375	2.5856	-9.23606	1.8e-10	3.66e-09	13.5867	FBgn0026619	CG8766	tafazzin	tafazzin	36405	8415 // acyltransferase activity // inferred from electronic annotation /// 5515 // protein binding // inferred from physical interaction	8152 // metabolism // inferred from electronic annotation	16020 // membrane // inferred from electronic annotation /// 16021 // integral to membrane // inferred from electronic annotation /// 16021 // integral to membrane // non-traceable author statement	IPR002123 // Phospholipid/glycerol acyltransferase // 4.0E-16 /// IPR002123 // Phospholipid/glycerol acyltransferase // 4.0E-16 /// IPR002123 // Phospholipid/glycerol acyltransferase // 4.0E-16
6179	147378_at	-0.857295	4.57778	-9.23556	1.8e-10	3.66e-09	13.5855	FBgn0034245	CG14482	CG14482	CG14482	36991	8121 // ubiquinol-cytochrome-c reductase activity // inferred from sequence or structural similarity /// 5515 // protein binding // inferred from physical interaction /// 8121 // ubiquinol-cytochrome-c reductase activity // inferred from sequence similarity	6122 // mitochondrial electron transport, ubiquinol to cytochrome c // inferred from sequence or structural similarity /// 6122 // mitochondrial electron transport, ubiquinol to cytochrome c // inferred from sequence similarity	5750 // respiratory chain complex III (sensu Eukaryota) // inferred from sequence or structural similarity /// 5750 // respiratory chain complex III (sensu Eukaryota) // inferred from sequence similarity	---
60	141259_at	-0.615494	1.68602	-9.23489	1.81e-10	3.66e-09	13.5838	FBgn0052633	CG32633	CG32633	CG32633	326225	---	---	---	---
2920	144119_at	-0.989511	1.43348	-9.23395	1.81e-10	3.66e-09	13.5814	FBgn0026089	CG14817	CG14817	CG14817	31145	---	---	---	---
7005	148204_at	-0.914553	0.445797	-9.20678	1.94e-10	3.9e-09	13.5122	FBgn0035581	CG17150	CG17150	CG17150	38586	166 // nucleotide binding // inferred from electronic annotation /// 3774 // motor activity // inferred from sequence or structural similarity /// 3777 // microtubule motor activity // inferred from electronic annotation /// 4197 // cysteine-type endopeptidase activity // inferred from electronic annotation /// 5200 // structural constituent of cytoskeleton // inferred from electronic annotation …	6508 // proteolysis // inferred from electronic annotation /// 6928 // cell motility // inferred from electronic annotation /// 7018 // microtubule-based movement // inferred from sequence or structural similarity /// 7018 // microtubule-based movement // inferred from sequence similarity	5875 // microtubule associated complex // inferred from sequence or structural similarity /// 30286 // dynein complex // inferred from sequence or structural similarity /// 5875 // microtubule associated complex // inferred from sequence similarity /// 30286 // dynein complex // inferred from sequence similarity	IPR004273 // Dynein heavy chain // 1.0E-126
10028	151227_f_at	-0.663575	0.518383	-9.20245	1.96e-10	3.94e-09	13.5012	FBgn0005613	CG8404	Sox15	Sox box protein 15	36575	3700 // transcription factor activity // inferred from sequence or structural similarity /// 4812 // aminoacyl-tRNA ligase activity // inferred from electronic annotation /// 5524 // ATP binding // inferred from electronic annotation /// 3677 // DNA binding // inferred from electronic annotation /// 3700 // transcription factor activity // inferred from sequence similarity	6357 // regulation of transcription from RNA polymerase II promoter // inferred from electronic annotation /// 6418 // tRNA aminoacylation for protein translation // inferred from electronic annotation /// 7398 // ectoderm development // inferred from electronic annotation /// 7399 // nervous system development // inferred from electronic annotation /// 45449 // regulation of transcription // inf…	5634 // nucleus // inferred from sequence or structural similarity /// 5634 // nucleus // non-traceable author statement /// 5634 // nucleus // inferred from electronic annotation /// 5634 // nucleus // inferred from sequence similarity	IPR000910 // HMG1/2 (high mobility group) box // 1.1E-31
5633	146832_at	-1.12836	1.56196	-9.19927	1.97e-10	3.96e-09	13.4931	FBgn0043575	CG14745	PGRP-SC2	PGRP-SC2	35862	8745 // N-acetylmuramoyl-L-alanine amidase activity // inferred from electronic annotation /// 42834 // peptidoglycan binding // inferred from sequence or structural similarity /// 42834 // peptidoglycan binding // non-traceable author statement /// 42834 // peptidoglycan binding // inferred from sequence similarity	6952 // defense response // non-traceable author statement /// 6955 // immune response // inferred from sequence or structural similarity /// 9253 // peptidoglycan catabolism // inferred from electronic annotation /// 9253 // peptidoglycan catabolism // inferred from sequence or structural similarity /// 45087 // innate immune response // inferred from sequence or structural similarity /// 6955 /…	5576 // extracellular region // inferred from sequence or structural similarity /// 5887 // integral to plasma membrane // non-traceable author statement /// 5576 // extracellular region // inferred from sequence similarity	IPR002502 // N-acetylmuramoyl-L-alanine amidase, family 2 // 5.6E-65
13127	154326_at	-0.537676	2.64958	-9.19811	1.98e-10	3.97e-09	13.4902	FBgn0027070	CG17322	CG17322	CG17322	35139	3851 // 2-hydroxyacylsphingosine 1-beta-galactosyltransferase activity // inferred from sequence or structural similarity /// 16740 // transferase activity // inferred from electronic annotation /// 16757 // transferase activity, transferring glycosyl groups // inferred from electronic annotation /// 16758 // transferase activity, transferring hexosyl groups // inferred from electronic annotation…	5976 // polysaccharide metabolism // inferred from electronic annotation /// 6952 // defense response // inferred from electronic annotation /// 8202 // steroid metabolism // inferred from electronic annotation /// 9636 // response to toxin // inferred from electronic annotation /// 8152 // metabolism // inferred from electronic annotation	---	IPR002213 // UDP-glucoronosyl/UDP-glucosyl transferase // 2.4E-40
238	141437_at	-0.858452	1.29215	-9.19034	2.02e-10	4.04e-09	13.4704	FBgn0036975	CG5618	CG5618	CG5618	40241	4782 // sulfinoalanine decarboxylase activity // inferred from sequence or structural similarity /// 17039 // dipeptidyl-peptidase III activity // inferred from electronic annotation /// 5515 // protein binding // inferred from physical interaction /// 16829 // lyase activity // inferred from electronic annotation /// 16831 // carboxy-lyase activity // inferred from electronic annotation /// 4782…	6508 // proteolysis // inferred from electronic annotation /// 6520 // amino acid metabolism // inferred from electronic annotation /// 6790 // sulfur metabolism // inferred from electronic annotation /// 7268 // synaptic transmission // inferred from electronic annotation /// 19752 // carboxylic acid metabolism // inferred from electronic annotation	5737 // cytoplasm // inferred from electronic annotation	IPR002129 // Pyridoxal-dependent decarboxylase // 1.3E-96 /// IPR002129 // Pyridoxal-dependent decarboxylase // 1.5E-80
10442	151641_at	-0.818329	2.62848	-9.18086	2.07e-10	4.13e-09	13.4462	FBgn0051673	CG31673	CG31673	CG31673	35348	30267 // glyoxylate reductase (NADP) activity // inferred from sequence or structural similarity /// 16616 // oxidoreductase activity, acting on the CH-OH group of donors, NAD or NADP as acceptor // inferred from electronic annotation /// 51287 // NAD binding // inferred from electronic annotation /// 30267 // glyoxylate reductase (NADP) activity // inferred from sequence similarity	5975 // carbohydrate metabolism // inferred from electronic annotation /// 6564 // L-serine biosynthesis // inferred from electronic annotation /// 8652 // amino acid biosynthesis // inferred from electronic annotation /// 8152 // metabolism // inferred from electronic annotation	---	IPR006140 // D-isomer specific 2-hydroxyacid dehydrogenase, NAD binding domain // 1.0E-57 /// IPR006139 // D-isomer specific 2-hydroxyacid dehydrogenase, catalytic domain // 6.0E-21
13638	154837_at	-0.420268	1.27617	-9.16333	2.16e-10	4.31e-09	13.4014	FBgn0034275	CG5002	CG5002	CG5002	37025	5215 // transporter activity // non-traceable author statement /// 15381 // high affinity sulfate permease activity // inferred from sequence or structural similarity /// 5515 // protein binding // inferred from physical interaction /// 5215 // transporter activity // inferred from electronic annotation /// 15381 // high affinity sulfate permease activity // inferred from sequence similarity	6790 // sulfur metabolism // inferred from electronic annotation /// 6820 // anion transport // inferred from electronic annotation /// 6858 // extracellular transport // inferred from electronic annotation /// 6810 // transport // inferred from electronic annotation	16020 // membrane // inferred from electronic annotation /// 16021 // integral to membrane // inferred from electronic annotation	IPR001902 // Sulphate transporter // 2.4E-65
11989	153188_at	-0.543926	3.11214	-9.13017	2.35e-10	4.66e-09	13.3167	FBgn0026567	CG2358	CG2358	CG2358	40815	8236 // serine-type peptidase activity // inferred from electronic annotation /// 9003 // signal peptidase activity // inferred from sequence or structural similarity /// 8233 // peptidase activity // inferred from electronic annotation /// 9003 // signal peptidase activity // inferred from sequence similarity	6465 // signal peptide processing // inferred from sequence or structural similarity /// 6508 // proteolysis // inferred from electronic annotation /// 6465 // signal peptide processing // inferred from electronic annotation /// 6465 // signal peptide processing // inferred from sequence similarity	5787 // signal peptidase complex // inferred from sequence or structural similarity /// 16020 // membrane // inferred from electronic annotation /// 5787 // signal peptidase complex // inferred from sequence similarity	IPR000508 // Peptidase S26, signal peptidase I // 4.1E-51
5611	146810_at	-1.30125	2.48543	-9.12362	2.39e-10	4.72e-09	13.3	FBgn0033297	CG8690	CG8690	CG8690	35830	4556 // alpha-amylase activity // inferred from electronic annotation /// 4558 // alpha-glucosidase activity // inferred from sequence or structural similarity /// 5215 // transporter activity // inferred from electronic annotation /// 4558 // alpha-glucosidase activity // inferred from sequence similarity	5975 // carbohydrate metabolism // inferred from electronic annotation	---	IPR006047 // Alpha amylase, catalytic domain // 2.2E-111
10646	151845_at	-1.21223	2.76584	-9.11565	2.44e-10	4.8e-09	13.2796	FBgn0034718	CG3413	wdp	windpipe	37548	---	---	5886 // plasma membrane // non-traceable author statement /// 16021 // integral to membrane // inferred from electronic annotation	IPR001611 // Leucine-rich repeat // 1.0E-4
7229	148428_at	-0.863356	2.91105	-9.08617	2.63e-10	5.12e-09	13.2041	FBgn0035933	CG13309	CG13309	CG13309	39012	8061 // chitin binding // inferred from electronic annotation	6030 // chitin metabolism // inferred from electronic annotation	5576 // extracellular region // inferred from electronic annotation	---
7136	148335_at	-0.615096	0.753131	-9.08387	2.64e-10	5.14e-09	13.1982	FBgn0052383	CG32383	CG32383	CG32383	318005	4295 // trypsin activity // inferred from sequence or structural similarity /// 4252 // serine-type endopeptidase activity // inferred from electronic annotation /// 4295 // trypsin activity // inferred from sequence similarity	6508 // proteolysis // inferred from electronic annotation	---	IPR001254 // Peptidase S1, chymotrypsin // 7.9E-12 /// IPR001254 // Peptidase S1, chymotrypsin // 7.9E-12
12206	153405_at	-1.01376	2.29313	-9.07392	2.71e-10	5.26e-09	13.1727	FBgn0051778	CG31778	CG31778	CG31778	261616	4867 // serine-type endopeptidase inhibitor activity // inferred from electronic annotation	---	---	---
5112	146311_at	-1.46646	3.74234	-9.06945	2.74e-10	5.31e-09	13.1612	FBgn0032472	CG9928	CG9928	CG9928	34704	5515 // protein binding // inferred from physical interaction	---	---	---
3568	144767_at	-0.433397	-0.029332	-9.0656	2.77e-10	5.36e-09	13.1514	FBgn0052698	CG32698	CG32698	CG32698	31915	4089 // carbonate dehydratase activity // inferred from sequence or structural similarity /// 8270 // zinc ion binding // inferred from electronic annotation /// 4089 // carbonate dehydratase activity // inferred from electronic annotation /// 4089 // carbonate dehydratase activity // inferred from sequence similarity	6730 // one-carbon compound metabolism // inferred from electronic annotation	---	IPR001148 // Carbonic anhydrase, eukaryotic // 5.9E-6 /// IPR001148 // Carbonic anhydrase, eukaryotic // 4.3E-48
3068	144267_at	-0.843149	2.48066	-9.065	2.77e-10	5.36e-09	13.1498	FBgn0028856	CG18063	CG18063	CG18063	34943	---	---	---	IPR000048 // IQ calmodulin-binding region // 5.1E-6 /// IPR000048 // IQ calmodulin-binding region // 9.8E-5 /// IPR000048 // IQ calmodulin-binding region // 5.1E-6 /// IPR000048 // IQ calmodulin-binding region // 9.8E-5
12289	153488_at	-0.762168	2.02514	-9.04502	2.92e-10	5.63e-09	13.0985	FBgn0011224	CG31000	heph	hephaestus	48571	3729 // mRNA binding // inferred from sequence or structural similarity /// 8187 // poly-pyrimidine tract binding // inferred from sequence or structural similarity /// 8187 // poly-pyrimidine tract binding // non-traceable author statement /// 5515 // protein binding // inferred from physical interaction /// 166 // nucleotide binding // inferred from electronic annotation /// 3676 // nucleic aci…	398 // nuclear mRNA splicing, via spliceosome // inferred from sequence or structural similarity /// 7219 // Notch signaling pathway // inferred from mutant phenotype /// 7286 // spermatid development // inferred from mutant phenotype /// 8586 // wing vein morphogenesis // inferred from mutant phenotype /// 8587 // wing margin morphogenesis // inferred from mutant phenotype /// 6397 // mRNA proce…	5681 // spliceosome complex // inferred from electronic annotation /// 5634 // nucleus // inferred from electronic annotation	IPR000504 // RNA-binding region RNP-1 (RNA recognition motif) // 1.1E-6 /// IPR000504 // RNA-binding region RNP-1 (RNA recognition motif) // 7.8E-8 /// IPR000504 // RNA-binding region RNP-1 (RNA recognition motif) // 3.7E-8 /// IPR000504 // RNA-binding region RNP-1 (RNA recognition motif) // 1.1E-6 /// IPR000504 // RNA-binding region RNP-1 (RNA recognition motif) // 7.8E-8 /// IPR000504 // RNA-bi…
13555	154754_at	-0.632024	2.19493	-9.04388	2.93e-10	5.64e-09	13.0956	FBgn0011817	CG7892	nmo	nemo	38890	4674 // protein serine/threonine kinase activity // inferred from sequence or structural similarity /// 4674 // protein serine/threonine kinase activity // non-traceable author statement /// 4702 // receptor signaling protein serine/threonine kinase activity // inferred from electronic annotation /// 4707 // MAP kinase activity // inferred from electronic annotation /// 5524 // ATP binding // inf…	165 // MAPKKK cascade // inferred from electronic annotation /// 1736 // establishment of planar polarity // traceable author statement /// 6468 // protein amino acid phosphorylation // non-traceable author statement /// 6916 // anti-apoptosis // inferred from electronic annotation /// 7456 // eye development (sensu Endopterygota) // inferred from mutant phenotype /// 7474 // wing vein specificat…	---	IPR000719 // Protein kinase // 4.9E-81 /// IPR000719 // Protein kinase // 7.5E-23
8474	149673_at	-0.494818	3.02704	-9.04204	2.94e-10	5.66e-09	13.0909	FBgn0037873	CG6666	CG6666	CG6666	41340	104 // succinate dehydrogenase activity // inferred from sequence or structural similarity /// 8177 // succinate dehydrogenase (ubiquinone) activity // inferred from sequence or structural similarity /// 104 // succinate dehydrogenase activity // inferred from electronic annotation /// 104 // succinate dehydrogenase activity // inferred from sequence similarity /// 8177 // succinate dehydrogenase…	6099 // tricarboxylic acid cycle // inferred from sequence or structural similarity /// 6105 // succinate metabolism // inferred from sequence or structural similarity /// 6121 // mitochondrial electron transport, succinate to ubiquinone // inferred from sequence or structural similarity /// 6099 // tricarboxylic acid cycle // inferred from electronic annotation /// 6118 // electron transport // …	5749 // respiratory chain complex II (sensu Eukaryota) // inferred from sequence or structural similarity /// 16020 // membrane // inferred from electronic annotation /// 5749 // respiratory chain complex II (sensu Eukaryota) // inferred from sequence similarity	IPR000701 // Succinate dehydrogenase, cytochrome b subunit // 5.5E-52
11751	152950_at	-0.964232	1.37417	-9.0025	3.25e-10	6.21e-09	12.9892	FBgn0029769	CG3239	CG3239	CG3239	31464	4245 // neprilysin activity // inferred from electronic annotation /// 8270 // zinc ion binding // inferred from electronic annotation /// 16511 // endothelin-converting enzyme activity // inferred from sequence or structural similarity /// 8233 // peptidase activity // inferred from electronic annotation /// 8237 // metallopeptidase activity // inferred from electronic annotation /// 16787 // hy…	6508 // proteolysis // inferred from electronic annotation	16020 // membrane // inferred from electronic annotation	IPR000718 // Peptidase M13, neprilysin // 3.1E-10 /// IPR000718 // Peptidase M13, neprilysin // 3.1E-10
2784	143983_r_at	-1.49706	5.17275	-8.99911	3.28e-10	6.25e-09	12.9805	---	CG15841 /// CG6555	---	---	---	5179 // hormone activity // non-traceable author statement	7610 // behavior // inferred from electronic annotation /// 45434 // negative regulation of female receptivity, post-mating // non-traceable author statement	5576 // extracellular region // traceable author statement	---
8569	149768_s_at	-0.783894	3.16182	-8.99792	3.29e-10	6.26e-09	12.9775	FBgn0038037	CG11466	Cyp9f2	Cyp9f2	41520	4497 // monooxygenase activity // inferred from electronic annotation /// 16491 // oxidoreductase activity // inferred from electronic annotation /// 5506 // iron ion binding // inferred from electronic annotation /// 20037 // heme binding // inferred from electronic annotation /// 46872 // metal ion binding // inferred from electronic annotation	6118 // electron transport // inferred from electronic annotation	5792 // microsome // non-traceable author statement /// 16020 // membrane // non-traceable author statement /// 5783 // endoplasmic reticulum // inferred from electronic annotation /// 5792 // microsome // inferred from electronic annotation /// 16020 // membrane // inferred from electronic annotation	IPR001128 // Cytochrome P450 // 1.5E-76 /// IPR001128 // Cytochrome P450 // 1.5E-79
2267	143466_f_at	-2.02349	3.09548	-8.99028	3.35e-10	6.36e-09	12.9578	FBgn0004427 /// FBgn0011201	CG9118	LysD /// LysA	Lysozyme D /// Lysozyme A	38127	3796 // lysozyme activity // inferred from direct assay /// 3796 // lysozyme activity // inferred from sequence or structural similarity /// 3796 // lysozyme activity // non-traceable author statement /// 4568 // chitinase activity // inferred from direct assay /// 3796 // lysozyme activity // inferred from electronic annotation /// 3824 // catalytic activity // inferred from electronic annotatio…	6960 // antimicrobial humoral response (sensu Protostomia) // non-traceable author statement /// 5975 // carbohydrate metabolism // inferred from electronic annotation /// 16998 // cell wall catabolism // inferred from electronic annotation /// 19835 // cytolysis // inferred from electronic annotation /// 42742 // defense response to bacteria // inferred from electronic annotation	5576 // extracellular region // inferred from electronic annotation	IPR001916 // Glycoside hydrolase, family 22 // 1.3E-67 /// IPR001916 // Glycoside hydrolase, family 22 // 3.2E-65
236	141435_at	-1.50846	2.45129	-8.96388	3.59e-10	6.77e-09	12.8898	FBgn0031249	CG11911	CG11911	CG11911	33206	4252 // serine-type endopeptidase activity // inferred from sequence or structural similarity /// 4263 // chymotrypsin activity // non-traceable author statement /// 4295 // trypsin activity // inferred from electronic annotation /// 4252 // serine-type endopeptidase activity // inferred from electronic annotation /// 8236 // serine-type peptidase activity // inferred from electronic annotation /…	6508 // proteolysis // non-traceable author statement /// 6508 // proteolysis // inferred from electronic annotation	---	IPR001254 // Peptidase S1, chymotrypsin // 1.6E-63
7479	148678_at	-0.764256	1.54758	-8.95688	3.65e-10	6.87e-09	12.8717	FBgn0036321	CG14120	CG14120	CG14120	39463	---	---	---	IPR001604 // DNA/RNA non-specific endonuclease // 7.9E-29 /// IPR001604 // DNA/RNA non-specific endonuclease // 1.8E-14 /// IPR001604 // DNA/RNA non-specific endonuclease // 5.3E-34
10269	151468_s_at	-0.6645	1.15667	-8.94422	3.77e-10	7.07e-09	12.839	FBgn0001404	CG9659	egh	egghead	31239	19187 // beta-1,4-mannosyltransferase activity // inferred from direct assay /// 5515 // protein binding // inferred from physical interaction /// 16740 // transferase activity // inferred from electronic annotation /// 16757 // transferase activity, transferring glycosyl groups // inferred from electronic annotation	7281 // germ cell development // inferred from mutant phenotype /// 7293 // egg chamber formation (sensu Insecta) // inferred from mutant phenotype /// 7298 // border follicle cell migration (sensu Insecta) // inferred from mutant phenotype /// 7299 // follicle cell adhesion (sensu Insecta) // inferred from mutant phenotype /// 9993 // oogenesis (sensu Insecta) // traceable author statement /// 1…	5887 // integral to plasma membrane // non-traceable author statement /// 16020 // membrane // inferred from electronic annotation /// 16021 // integral to membrane // inferred from electronic annotation /// 16021 // integral to membrane // non-traceable author statement	---
7600	148799_at	-0.679277	0.92065	-8.93464	3.86e-10	7.22e-09	12.8143	FBgn0036492	CG12327	Best3	Bestrophin 3	39661	---	6810 // transport // inferred from electronic annotation /// 6811 // ion transport // inferred from electronic annotation	---	IPR000615 // Bestrophin // 1.0E-126
3749	144948_at	-0.515101	-0.11794	-8.92809	3.93e-10	7.33e-09	12.7974	FBgn0030403	CG1824	CG1824	CG1824	32208	166 // nucleotide binding // inferred from electronic annotation /// 5215 // transporter activity // inferred from sequence or structural similarity /// 5524 // ATP binding // inferred from electronic annotation /// 42626 // ATPase activity, coupled to transmembrane movement of substances // inferred from sequence or structural similarity /// 16887 // ATPase activity // inferred from electronic a…	6858 // extracellular transport // inferred from electronic annotation /// 6952 // defense response // inferred from electronic annotation /// 9636 // response to toxin // inferred from electronic annotation /// 6810 // transport // inferred from electronic annotation	5743 // mitochondrial inner membrane // inferred from sequence or structural similarity /// 16021 // integral to membrane // inferred from electronic annotation /// 16020 // membrane // inferred from electronic annotation /// 5743 // mitochondrial inner membrane // inferred from sequence similarity	IPR001140 // ABC transporter, transmembrane region // 1.9E-36 /// IPR003439 // ABC transporter // 8.3E-65
1846	143045_at	-0.653365	0.843236	-8.90937	4.12e-10	7.67e-09	12.749	FBgn0038098	CG7381	CG7381	CG7381	41589	---	---	16020 // membrane // inferred from electronic annotation /// 16021 // integral to membrane // inferred from electronic annotation	---
5074	146273_at	-0.745292	1.8801	-8.87011	4.56e-10	8.43e-09	12.6474	FBgn0032413	CG16997	CG16997	CG16997	34638	4252 // serine-type endopeptidase activity // inferred from sequence or structural similarity /// 4263 // chymotrypsin activity // non-traceable author statement /// 4295 // trypsin activity // inferred from electronic annotation /// 4252 // serine-type endopeptidase activity // inferred from electronic annotation /// 4252 // serine-type endopeptidase activity // inferred from sequence similarity	6508 // proteolysis // non-traceable author statement /// 6508 // proteolysis // inferred from electronic annotation	---	IPR001254 // Peptidase S1, chymotrypsin // 1.2E-53
5563	146762_at	-0.671182	1.0171	-8.86271	4.64e-10	8.58e-09	12.6282	FBgn0033214	CG1941	CG1941	CG1941	35718	---	---	---	IPR007130 // Diacylglycerol acyltransferase // 1.0E-126
5882	147081_at	-0.427943	0.441814	-8.85175	4.78e-10	8.81e-09	12.5998	FBgn0033718	CG13162	CG13162	CG13162	36341	---	---	---	---
13007	154206_at	-1.06901	2.7111	-8.84834	4.82e-10	8.87e-09	12.591	FBgn0038984	CG5315	CG5315	CG5315	42656	42562 // hormone binding // inferred from sequence or structural similarity /// 5515 // protein binding // inferred from physical interaction /// 4872 // receptor activity // inferred from electronic annotation /// 42562 // hormone binding // inferred from sequence similarity	9755 // hormone-mediated signaling // inferred from sequence or structural similarity /// 19395 // fatty acid oxidation // inferred from sequence or structural similarity /// 6629 // lipid metabolism // inferred from electronic annotation /// 6631 // fatty acid metabolism // inferred from electronic annotation /// 9755 // hormone-mediated signaling // inferred from sequence similarity /// 19395 /…	16021 // integral to membrane // inferred from sequence or structural similarity /// 16020 // membrane // inferred from electronic annotation /// 16021 // integral to membrane // inferred from electronic annotation /// 16021 // integral to membrane // inferred from sequence similarity	IPR004254 // Hly-III related proteins // 1.0E-112 /// IPR004254 // Hly-III related proteins // 1.0E-112
5525	146724_at	-0.990347	3.60887	-8.84582	4.85e-10	8.92e-09	12.5844	FBgn0024293	CG1865	Spn43Ab	Serine protease inhibitor 43Ab	45040	4867 // serine-type endopeptidase inhibitor activity // inferred from sequence or structural similarity /// 4867 // serine-type endopeptidase inhibitor activity // inferred from electronic annotation /// 4867 // serine-type endopeptidase inhibitor activity // inferred from sequence similarity	6508 // proteolysis // inferred from electronic annotation	---	IPR000215 // Serpin // 5.8E-62
6115	147314_at	-0.626518	1.41942	-8.83703	4.96e-10	9.1e-09	12.5616	FBgn0034133	CG7813	CG7813	CG7813	36845	8553 // hydrogen-exporting ATPase activity, phosphorylative mechanism // inferred from sequence or structural similarity /// 46933 // hydrogen-transporting ATP synthase activity, rotational mechanism // inferred from electronic annotation /// 46961 // hydrogen-transporting ATPase activity, rotational mechanism // inferred from electronic annotation /// 8553 // hydrogen-exporting ATPase activity, …	6812 // cation transport // inferred from electronic annotation /// 15986 // ATP synthesis coupled proton transport // inferred from electronic annotation	5753 // proton-transporting ATP synthase complex (sensu Eukaryota) // inferred from sequence or structural similarity /// 16469 // proton-transporting two-sector ATPase complex // inferred from electronic annotation /// 5753 // proton-transporting ATP synthase complex (sensu Eukaryota) // inferred from sequence similarity	IPR008689 // ATP synthase D chain, mitochondrial // 3.5E-117
2919	144118_at	-0.720462	2.56237	-8.83273	5.02e-10	9.19e-09	12.5505	FBgn0026088	CG14818	CG14818	CG14818	31147	5515 // protein binding // inferred from physical interaction	---	---	IPR005374 // Protein of unknown function UPF0184 // 2.0E-54
2671	143870_at	-0.647338	4.66432	-8.83164	5.03e-10	9.2e-09	12.5476	FBgn0016119	CG4412	ATPsyn-Cf6	ATPase coupling factor 6	42759	8553 // hydrogen-exporting ATPase activity, phosphorylative mechanism // inferred from sequence or structural similarity /// 8553 // hydrogen-exporting ATPase activity, phosphorylative mechanism // non-traceable author statement /// 46933 // hydrogen-transporting ATP synthase activity, rotational mechanism // inferred from electronic annotation /// 46961 // hydrogen-transporting ATPase activity, …	6118 // electron transport // inferred from electronic annotation /// 6119 // oxidative phosphorylation // inferred from electronic annotation /// 15986 // ATP synthesis coupled proton transport // inferred from electronic annotation /// 15992 // proton transport // inferred from sequence or structural similarity /// 15992 // proton transport // non-traceable author statement /// 6810 // transpor…	5756 // proton-transporting ATP synthase, central stalk (sensu Eukaryota) // inferred from sequence or structural similarity /// 5739 // mitochondrion // inferred from electronic annotation /// 16469 // proton-transporting two-sector ATPase complex // inferred from electronic annotation /// 45263 // proton-transporting ATP synthase complex, coupling factor F(o) // inferred from electronic annotat…	IPR008387 // Mitochondrial ATP synthase coupling factor 6 // 3.3E-65
9685	150884_at	-1.38101	2.68926	-8.81952	5.19e-10	9.47e-09	12.5162	FBgn0039761	CG18404	CG18404	CG18404	43603	5515 // protein binding // inferred from physical interaction	---	---	---
370	141569_at	-0.972508	3.31923	-8.81049	5.31e-10	9.65e-09	12.4927	FBgn0039122	CG10192	CG10192	CG10192	42819	3729 // mRNA binding // inferred from electronic annotation /// 3743 // translation initiation factor activity // inferred from sequence or structural similarity /// 3723 // RNA binding // inferred from electronic annotation /// 3743 // translation initiation factor activity // inferred from sequence similarity	6413 // translational initiation // inferred from sequence or structural similarity /// 6445 // regulation of translation // inferred from electronic annotation /// 35071 // salivary gland cell autophagic cell death // inferred from expression pattern /// 48102 // autophagic cell death // inferred from expression pattern /// 6413 // translational initiation // inferred from sequence similarity	16281 // eukaryotic translation initiation factor 4F complex // inferred from sequence or structural similarity /// 16281 // eukaryotic translation initiation factor 4F complex // inferred from sequence similarity	IPR003890 // Initiation factor eIF-4 gamma, middle // 2.1E-66 /// IPR003891 // Initiation factor eIF-4 gamma, MA3 // 7.0E-37
2581	143780_at	-0.962331	1.13877	-8.80286	5.42e-10	9.82e-09	12.4729	FBgn0015034	CG2062	Cyp4e1	Cytochrome P450-4e1	44632	4497 // monooxygenase activity // inferred from electronic annotation /// 16491 // oxidoreductase activity // inferred from electronic annotation /// 5506 // iron ion binding // inferred from electronic annotation /// 20037 // heme binding // inferred from electronic annotation /// 46872 // metal ion binding // inferred from electronic annotation	6118 // electron transport // inferred from electronic annotation	5792 // microsome // non-traceable author statement /// 16020 // membrane // non-traceable author statement /// 5783 // endoplasmic reticulum // inferred from electronic annotation /// 5792 // microsome // inferred from electronic annotation /// 16020 // membrane // inferred from electronic annotation	IPR001128 // Cytochrome P450 // 5.0E-90
195	141394_at	-0.577027	1.93436	-8.80221	5.43e-10	9.82e-09	12.4712	FBgn0035656	CG10479	CG10479	CG10479	38674	---	7242 // intracellular signaling cascade // inferred from electronic annotation	---	IPR000980 // SH2 motif // 6.2E-11
10340	151539_at	-0.858857	2.82661	-8.79598	5.51e-10	9.95e-09	12.455	FBgn0050359	CG30359	CG30359	CG30359	35828	4556 // alpha-amylase activity // inferred from electronic annotation /// 5215 // transporter activity // inferred from electronic annotation /// 15926 // glucosidase activity // inferred from electronic annotation /// 16787 // hydrolase activity // inferred from electronic annotation	5975 // carbohydrate metabolism // inferred from electronic annotation	---	IPR006047 // Alpha amylase, catalytic domain // 1.0E-126
6973	148172_at	-0.595202	1.46534	-8.78998	5.6e-10	1.01e-08	12.4394	FBgn0053514	CG33514	CG33514	CG33514	3346239	8431 // vitamin E binding // inferred from sequence or structural similarity /// 5215 // transporter activity // inferred from electronic annotation /// 8431 // vitamin E binding // inferred from sequence similarity	6810 // transport // inferred from electronic annotation	5622 // intracellular // inferred from electronic annotation	IPR001251 // Cellular retinaldehyde-binding)/triple function, C-terminal // 6.9E-23
5518	146717_at	-0.72162	1.21994	-8.78683	5.64e-10	1.01e-08	12.4312	FBgn0033138	CG12832	Tsp42Eq	Tetraspanin 42Eq	35628	---	---	16021 // integral to membrane // inferred from sequence or structural similarity /// 16021 // integral to membrane // inferred from electronic annotation /// 16021 // integral to membrane // inferred from sequence similarity	IPR000301 // CD9/CD37/CD63 antigen // 1.1E-18
9204	150403_at	-0.8416	1.76825	-8.77637	5.8e-10	1.04e-08	12.404	FBgn0039030	CG6660	CG6660	CG6660	42708	8415 // acyltransferase activity // inferred from electronic annotation /// 16740 // transferase activity // inferred from electronic annotation	6629 // lipid metabolism // inferred from electronic annotation /// 6631 // fatty acid metabolism // inferred from electronic annotation	16021 // integral to membrane // inferred from electronic annotation	IPR002076 // GNS1/SUR4 membrane protein // 4.3E-8 /// IPR002076 // GNS1/SUR4 membrane protein // 4.3E-8
9784	150983_at	-0.695025	2.236	-8.77583	5.81e-10	1.04e-08	12.4026	FBgn0039914	CG1901	mav	maverick	43804	5160 // transforming growth factor beta receptor binding // inferred from sequence or structural similarity /// 5160 // transforming growth factor beta receptor binding // non-traceable author statement /// 8083 // growth factor activity // inferred from electronic annotation /// 5515 // protein binding // inferred from physical interaction /// 5160 // transforming growth factor beta receptor bin…	7179 // transforming growth factor beta receptor signaling pathway // inferred from sequence or structural similarity /// 40007 // growth // inferred from electronic annotation /// 50875 // cellular physiological process // inferred from electronic annotation /// 7179 // transforming growth factor beta receptor signaling pathway // inferred from sequence similarity	---	IPR001839 // Transforming growth factor beta // 1.0E-13 /// IPR001111 // Transforming growth factor beta (TGFb), N-terminal // 2.5E-8 /// IPR001839 // Transforming growth factor beta // 1.0E-13 /// IPR001111 // Transforming growth factor beta (TGFb), N-terminal // 2.5E-8
5815	147014_at	-1.08317	1.52473	-8.76299	6e-10	1.07e-08	12.3691	FBgn0043470	CG12350	Try	Try	36214	4263 // chymotrypsin activity // inferred from electronic annotation /// 4295 // trypsin activity // inferred from sequence or structural similarity /// 4295 // trypsin activity // non-traceable author statement /// 4252 // serine-type endopeptidase activity // inferred from electronic annotation /// 4295 // trypsin activity // inferred from electronic annotation /// 8233 // peptidase activity //…	6508 // proteolysis // non-traceable author statement /// 6508 // proteolysis // inferred from electronic annotation	5576 // extracellular region // inferred from sequence or structural similarity /// 5576 // extracellular region // inferred from sequence similarity	IPR001254 // Peptidase S1, chymotrypsin // 2.5E-81
5113	146312_at	-0.556266	0.727365	-8.74984	6.21e-10	1.1e-08	12.3349	FBgn0032473	CG5204	CG5204	CG5204	34706	3676 // nucleic acid binding // inferred from electronic annotation /// 8270 // zinc ion binding // inferred from electronic annotation	---	5634 // nucleus // inferred from electronic annotation	---
4967	146166_at	-0.783607	1.79497	-8.73875	6.39e-10	1.13e-08	12.306	FBgn0032265	CG18301	CG18301	CG18301	34451	16298 // lipase activity // inferred from electronic annotation /// 16787 // hydrolase activity // inferred from electronic annotation /// 5515 // protein binding // inferred from physical interaction /// 3824 // catalytic activity // inferred from electronic annotation /// 16789 // carboxylic ester hydrolase activity // inferred from electronic annotation	6629 // lipid metabolism // inferred from electronic annotation /// 16042 // lipid catabolism // inferred from electronic annotation	---	IPR000073 // Alpha/beta hydrolase fold // 1.5E-13 /// IPR006693 // Ab-hydrolase associated lipase region // 2.9E-30
2266	143465_f_at	-1.84513	2.13452	-8.73452	6.46e-10	1.14e-08	12.2949	FBgn0004426 /// FBgn0011201	CG9111	LysC /// LysA	Lysozyme C /// Lysozyme A	38126	3796 // lysozyme activity // inferred from sequence or structural similarity /// 3796 // lysozyme activity // non-traceable author statement /// 5515 // protein binding // inferred from physical interaction /// 3796 // lysozyme activity // inferred from electronic annotation /// 3824 // catalytic activity // inferred from electronic annotation /// 16787 // hydrolase activity // inferred from elec…	6960 // antimicrobial humoral response (sensu Protostomia) // non-traceable author statement /// 5975 // carbohydrate metabolism // inferred from electronic annotation /// 16998 // cell wall catabolism // inferred from electronic annotation /// 19835 // cytolysis // inferred from electronic annotation /// 42742 // defense response to bacteria // inferred from electronic annotation /// 16043 // ce…	5576 // extracellular region // inferred from electronic annotation	IPR001916 // Glycoside hydrolase, family 22 // 3.2E-65
1528	142727_at	-0.555452	0.474668	-8.73078	6.52e-10	1.15e-08	12.2852	FBgn0032449	CG17036	CG17036	CG17036	34679	5542 // folic acid binding // inferred from electronic annotation /// 8518 // reduced folate carrier activity // inferred from sequence or structural similarity /// 8518 // reduced folate carrier activity // inferred from sequence similarity	6732 // coenzyme metabolism // inferred from electronic annotation /// 6810 // transport // inferred from electronic annotation /// 51189 // prosthetic group metabolism // inferred from electronic annotation	5886 // plasma membrane // inferred from sequence or structural similarity /// 5886 // plasma membrane // inferred from sequence similarity	IPR002666 // Reduced folate carrier // 3.2E-63 /// IPR002666 // Reduced folate carrier // 2.8E-44
10784	151983_at	-0.6088	4.05155	-8.72234	6.67e-10	1.17e-08	12.2632	FBgn0027590	CG16936	CG16936	CG16936	37960	4364 // glutathione transferase activity // inferred from sequence or structural similarity /// 16740 // transferase activity // inferred from electronic annotation /// 4364 // glutathione transferase activity // inferred from sequence similarity	6952 // defense response // inferred from electronic annotation /// 9636 // response to toxin // inferred from electronic annotation	---	IPR004046 // Glutathione S-transferase, C-terminal // 4.5E-11 /// IPR004045 // Glutathione S-transferase, N-terminal // 1.7E-15
3572	144771_at	-1.01501	3.94664	-8.71956	6.71e-10	1.18e-08	12.2559	FBgn0030160	CG9691	CG9691	CG9691	31923	---	---	---	---
9688	150887_at	-0.705471	0.23838	-8.71601	6.77e-10	1.19e-08	12.2467	FBgn0039768	CG15533	CG15533	CG15533	43612	4767 // sphingomyelin phosphodiesterase activity // inferred from sequence or structural similarity /// 4767 // sphingomyelin phosphodiesterase activity // inferred from electronic annotation /// 16787 // hydrolase activity // inferred from electronic annotation /// 4767 // sphingomyelin phosphodiesterase activity // inferred from sequence similarity	6684 // sphingomyelin metabolism // inferred from sequence or structural similarity /// 6685 // sphingomyelin catabolism // inferred from electronic annotation /// 6684 // sphingomyelin metabolism // inferred from sequence similarity	---	IPR004843 // Metallo-phosphoesterase // 8.3E-18
13391	154590_at	-0.60621	0.914282	-8.70247	7.02e-10	1.23e-08	12.2113	FBgn0036379	CG12478	bru-3	bruno-3	39527	3729 // mRNA binding // inferred from sequence or structural similarity /// 5515 // protein binding // inferred from physical interaction /// 166 // nucleotide binding // inferred from electronic annotation /// 3676 // nucleic acid binding // inferred from electronic annotation /// 3729 // mRNA binding // inferred from sequence similarity	19538 // protein metabolism // inferred from electronic annotation	---	IPR000504 // RNA-binding region RNP-1 (RNA recognition motif) // 1.1E-15 /// IPR000504 // RNA-binding region RNP-1 (RNA recognition motif) // 1.5E-21 /// IPR000504 // RNA-binding region RNP-1 (RNA recognition motif) // 1.5E-21
13988	AFFX-Dros-GAPDH_3_at	-0.94664	4.64258	-8.69889	7.08e-10	1.23e-08	12.2019	---	---	---	---	---	166 // nucleotide binding // inferred from electronic annotation /// 3676 // nucleic acid binding // inferred from electronic annotation /// 3677 // DNA binding // inferred from electronic annotation /// 3723 // RNA binding // inferred from electronic annotation /// 3743 // translation initiation factor activity // inferred from electronic annotation /// 4386 // helicase activity // inferred from…	381 // regulation of alternative nuclear mRNA splicing, via spliceosome // inferred from mutant phenotype /// 6412 // protein biosynthesis // inferred from electronic annotation /// 2168 // larval development (sensu Insecta) // traceable author statement /// 7446 // imaginal disc growth // traceable author statement	---	---
13633	154832_at	-0.841274	4.03791	-8.69797	7.1e-10	1.24e-08	12.1995	FBgn0001215	CG9983	Hrb98DE	Heterogeneous nuclear ribonucleoprotein at 98DE	43385	3729 // mRNA binding // inferred from sequence or structural similarity /// 3729 // mRNA binding // non-traceable author statement /// 5515 // protein binding // inferred from physical interaction /// 166 // nucleotide binding // inferred from electronic annotation /// 3676 // nucleic acid binding // inferred from electronic annotation /// 3723 // RNA binding // inferred from electronic annotatio…	6397 // mRNA processing // inferred from electronic annotation /// 6403 // RNA localization // inferred from electronic annotation	30529 // ribonucleoprotein complex // inferred from direct assay /// 30529 // ribonucleoprotein complex // inferred from physical interaction /// 30529 // ribonucleoprotein complex // inferred from sequence or structural similarity /// 30529 // ribonucleoprotein complex // non-traceable author statement /// 30530 // heterogeneous nuclear ribonucleoprotein complex // inferred from sequence or stru…	IPR000504 // RNA-binding region RNP-1 (RNA recognition motif) // 3.8E-19 /// IPR000504 // RNA-binding region RNP-1 (RNA recognition motif) // 2.6E-20 /// IPR000504 // RNA-binding region RNP-1 (RNA recognition motif) // 3.8E-19 /// IPR000504 // RNA-binding region RNP-1 (RNA recognition motif) // 2.6E-20 /// IPR000504 // RNA-binding region RNP-1 (RNA recognition motif) // 3.8E-19 /// IPR000504 // R…
2473	143672_at	-1.00758	5.76972	-8.68389	7.36e-10	1.28e-08	12.1627	FBgn0011669	CG5016	Mst57Db	Male-specific RNA 57Db	43122	4418 // hydroxymethylbilane synthase activity // inferred from electronic annotation	18991 // oviposition // non-traceable author statement /// 45297 // post-mating behavior // non-traceable author statement /// 6779 // porphyrin biosynthesis // inferred from electronic annotation	5576 // extracellular region // non-traceable author statement	---
10489	151688_s_at	-0.756366	2.16622	-8.6806	7.42e-10	1.29e-08	12.1541	FBgn0001169	CG5460	H	Hairless	42445	3714 // transcription corepressor activity // inferred from direct assay /// 5515 // protein binding // inferred from physical interaction /// 3677 // DNA binding // inferred from electronic annotation	7219 // Notch signaling pathway // non-traceable author statement /// 8052 // sensory organ determination // inferred from mutant phenotype /// 16360 // sensory organ precursor cell fate determination // inferred from mutant phenotype /// 16360 // sensory organ precursor cell fate determination // traceable author statement /// 45746 // negative regulation of Notch signaling pathway // inferred f…	5634 // nucleus // non-traceable author statement /// 5634 // nucleus // traceable author statement /// 5634 // nucleus // inferred from electronic annotation	---
7756	148955_at	-0.519082	2.3534	-8.67749	7.48e-10	1.29e-08	12.146	FBgn0036726	CG7603	CG7603	CG7603	39948	5515 // protein binding // inferred from physical interaction	---	---	---
11022	152221_at	-0.666121	1.65894	-8.67795	7.48e-10	1.29e-08	12.1472	FBgn0038292	CG3987	CG3987	CG3987	41822	---	7498 // mesoderm development // inferred from expression pattern	---	---
10855	152054_at	-1.08427	2.20592	-8.6769	7.5e-10	1.29e-08	12.1445	FBgn0030425	CG3775	CG3775	CG3775	32234	4222 // metalloendopeptidase activity // inferred from sequence or structural similarity /// 4245 // neprilysin activity // inferred from electronic annotation /// 8270 // zinc ion binding // inferred from electronic annotation /// 8233 // peptidase activity // inferred from electronic annotation /// 8237 // metallopeptidase activity // inferred from electronic annotation /// 16787 // hydrolase a…	6508 // proteolysis // inferred from electronic annotation	16020 // membrane // inferred from electronic annotation	IPR008753 // Peptidase M13 // 4.2E-6 /// IPR000718 // Peptidase M13, neprilysin // 1.3E-8 /// IPR000718 // Peptidase M13, neprilysin // 1.6E-17
10098	151297_at	-0.575118	0.346388	-8.65946	7.84e-10	1.34e-08	12.0988	FBgn0040823	CG14162	dpr6	dpr6	50296	---	---	---	IPR007110 // Immunoglobulin-like // 5.5E-4 /// IPR007110 // Immunoglobulin-like // 2.8E-7
9093	150292_at	-0.548044	1.48322	-8.65712	7.89e-10	1.35e-08	12.0927	FBgn0038849	CG7079	CG7079	CG7079	42488	---	---	---	IPR004272 // Odorant binding protein // 6.3E-53
10839	152038_at	-0.6444	1.67731	-8.65042	8.03e-10	1.37e-08	12.0752	FBgn0021800	CG3920	l(2)k16918	lethal (2) k16918	47399	---	---	---	---
1567	142766_at	-0.949352	2.2711	-8.64929	8.05e-10	1.38e-08	12.0722	FBgn0032235	CG5096	CG5096	CG5096	34410	4872 // receptor activity // inferred from electronic annotation /// 5515 // protein binding // inferred from physical interaction	7155 // cell adhesion // inferred from electronic annotation /// 7275 // development // inferred from electronic annotation /// 19226 // transmission of nerve impulse // inferred from electronic annotation	---	IPR001611 // Leucine-rich repeat // 0.0034 /// IPR001611 // Leucine-rich repeat // 0.079 /// IPR001611 // Leucine-rich repeat // 0.0055 /// IPR001611 // Leucine-rich repeat // 0.37 /// IPR001611 // Leucine-rich repeat // 0.23 /// IPR001611 // Leucine-rich repeat // 0.18
11620	152819_at	-0.828847	1.31197	-8.64759	8.09e-10	1.38e-08	12.0677	FBgn0038733	CG11407	CG11407	CG11407	42354	5324 // long-chain fatty acid transporter activity // inferred from sequence or structural similarity /// 16874 // ligase activity // inferred from electronic annotation /// 5515 // protein binding // inferred from physical interaction /// 3824 // catalytic activity // inferred from electronic annotation /// 5324 // long-chain fatty acid transporter activity // inferred from sequence similarity	8152 // metabolism // inferred from electronic annotation	---	IPR000873 // AMP-dependent synthetase and ligase // 9.1E-88
2238	143437_at	-1.62916	5.68096	-8.6439	8.16e-10	1.39e-08	12.0581	FBgn0011694	CG2665	PebII	Protein ejaculatory bulb II	326108	5198 // structural molecule activity // inferred from sequence or structural similarity	45297 // post-mating behavior // inferred from sequence or structural similarity /// 7610 // behavior // inferred from electronic annotation	5576 // extracellular region // non-traceable author statement	---
8722	149921_at	-1.59891	-0.609496	-8.63802	8.29e-10	1.41e-08	12.0427	FBgn0053555	CG33555	btsz	bitesize	3346167	3677 // DNA binding // inferred from electronic annotation /// 5215 // transporter activity // inferred from sequence or structural similarity /// 5215 // transporter activity // inferred from electronic annotation /// 5215 // transporter activity // inferred from sequence similarity	40018 // positive regulation of body size // inferred from mutant phenotype /// 45793 // positive regulation of cell size // inferred from mutant phenotype /// 48489 // synaptic vesicle transport // inferred from sequence or structural similarity /// 6810 // transport // inferred from electronic annotation /// 48489 // synaptic vesicle transport // inferred from sequence similarity	5634 // nucleus // inferred from electronic annotation /// 8021 // synaptic vesicle // inferred from electronic annotation /// 16020 // membrane // inferred from sequence or structural similarity /// 16020 // membrane // inferred from electronic annotation /// 16020 // membrane // inferred from sequence similarity	IPR000008 // C2 domain // 1.9E-37 /// IPR000008 // C2 domain // 1.3E-32
3170	144369_at	-0.687777	0.830749	-8.63533	8.35e-10	1.42e-08	12.0356	FBgn0040364	CG11378	CG11378	CG11378	31060	---	---	---	IPR009832 // Protein of unknown function DUF1397 // 1.0E-126
8370	149569_at	-0.589521	2.63244	-8.63483	8.36e-10	1.42e-08	12.0343	FBgn0037715	CG9399	CG9399	CG9399	41157	5515 // protein binding // inferred from physical interaction	---	---	IPR005336 // Protein of unknown function UPF0041 // 3.0E-42
273	141472_at	-1.37925	2.15635	-8.61108	8.89e-10	1.5e-08	11.972	FBgn0001114	CG9280	Glt	Glutactin	34193	3824 // catalytic activity // inferred from electronic annotation /// 5509 // calcium ion binding // non-traceable author statement /// 5509 // calcium ion binding // inferred from electronic annotation	---	5604 // basement membrane // inferred from direct assay /// 5604 // basement membrane // non-traceable author statement	IPR002018 // Carboxylesterase, type B // 1.0E-126
7399	148598_at	-0.607417	0.374121	-8.60796	8.96e-10	1.51e-08	11.9638	FBgn0052087	CG32087	CG32087	CG32087	39323	---	---	---	---
3476	144675_at	-1.25258	2.77967	-8.58277	9.57e-10	1.6e-08	11.8977	FBgn0029994	CG2254	CG2254	CG2254	31726	16491 // oxidoreductase activity // inferred from sequence or structural similarity /// 16491 // oxidoreductase activity // inferred from electronic annotation /// 16491 // oxidoreductase activity // inferred from sequence similarity	7601 // visual perception // inferred from electronic annotation /// 8152 // metabolism // inferred from electronic annotation	---	IPR002198 // Short-chain dehydrogenase/reductase SDR // 2.3E-49
8539	149738_r_at	-0.708396	0.321517	-8.58343	9.55e-10	1.6e-08	11.8994	---	---	---	---	---	---	---	---	---
9983	151182_at	-0.8544	2.14587	-8.58308	9.56e-10	1.6e-08	11.8985	FBgn0040705	CG15434	CG15434	CG15434	50178	3954 // NADH dehydrogenase activity // inferred from sequence or structural similarity /// 3954 // NADH dehydrogenase activity // inferred from sequence similarity	6120 // mitochondrial electron transport, NADH to ubiquinone // inferred from sequence or structural similarity /// 6120 // mitochondrial electron transport, NADH to ubiquinone // inferred from sequence similarity	5747 // respiratory chain complex I (sensu Eukaryota) // inferred from sequence or structural similarity /// 5747 // respiratory chain complex I (sensu Eukaryota) // inferred from sequence similarity	IPR007741 // Mitochondrial ribosome // 9.7E-23
12811	154010_at	-0.518514	1.39646	-8.58147	9.6e-10	1.6e-08	11.8943	FBgn0027528	CG9634	CG9634	CG9634	32660	4222 // metalloendopeptidase activity // inferred from sequence or structural similarity /// 16511 // endothelin-converting enzyme activity // inferred from sequence or structural similarity /// 4245 // neprilysin activity // inferred from electronic annotation /// 8237 // metallopeptidase activity // inferred from electronic annotation /// 4222 // metalloendopeptidase activity // inferred from s…	6508 // proteolysis // inferred from electronic annotation /// 7165 // signal transduction // inferred from electronic annotation	16020 // membrane // inferred from electronic annotation	IPR008753 // Peptidase M13 // 2.0E-6
10848	152047_at	-0.615709	1.64065	-8.56899	9.92e-10	1.65e-08	11.8615	FBgn0027583	CG7601	CG7601	CG7601	43502	16491 // oxidoreductase activity // inferred from sequence or structural similarity /// 16491 // oxidoreductase activity // inferred from electronic annotation /// 16491 // oxidoreductase activity // inferred from sequence similarity	8152 // metabolism // inferred from electronic annotation	---	IPR002198 // Short-chain dehydrogenase/reductase SDR // 1.7E-49
12148	153347_at	-0.89925	3.74132	-8.56146	1.01e-09	1.68e-08	11.8417	FBgn0001128	CG9042	Gpdh	Glycerol 3 phosphate dehydrogenase	33824	4367 // glycerol-3-phosphate dehydrogenase (NAD+) activity // inferred from sequence or structural similarity /// 4367 // glycerol-3-phosphate dehydrogenase (NAD+) activity // non-traceable author statement /// 4367 // glycerol-3-phosphate dehydrogenase (NAD+) activity // inferred from electronic annotation /// 16491 // oxidoreductase activity // inferred from electronic annotation /// 16614 // o…	5975 // carbohydrate metabolism // inferred from electronic annotation /// 6072 // glycerol-3-phosphate metabolism // inferred from sequence or structural similarity /// 6127 // glycerophosphate shuttle // non-traceable author statement /// 6629 // lipid metabolism // inferred from electronic annotation /// 6072 // glycerol-3-phosphate metabolism // inferred from electronic annotation /// 46168 /…	5737 // cytoplasm // non-traceable author statement /// 9331 // glycerol-3-phosphate dehydrogenase complex // inferred from electronic annotation /// 5737 // cytoplasm // inferred from electronic annotation	IPR006168 // NAD-dependent glycerol-3-phosphate dehydrogenase // 1.0E-126
12178	153377_at	-0.948409	2.7777	-8.55803	1.02e-09	1.69e-08	11.8327	FBgn0010350	CG7962	CdsA	CDP diglyceride synthetase	43950	4605 // phosphatidate cytidylyltransferase activity // inferred from sequence or structural similarity /// 4605 // phosphatidate cytidylyltransferase activity // non-traceable author statement /// 4605 // phosphatidate cytidylyltransferase activity // inferred from sequence similarity	6644 // phospholipid metabolism // inferred from electronic annotation /// 7430 // terminal branching of trachea, cytoplasmic projection extension (sensu Insecta) // non-traceable author statement /// 7602 // phototransduction // inferred from genetic interaction /// 7602 // phototransduction // inferred from mutant phenotype /// 7602 // phototransduction // non-traceable author statement /// 865…	5635 // nuclear envelope // inferred from direct assay /// 5783 // endoplasmic reticulum // inferred from direct assay /// 5790 // smooth endoplasmic reticulum // inferred from direct assay /// 5887 // integral to plasma membrane // non-traceable author statement	IPR000374 // Phosphatidate cytidylyltransferase // 1.0E-126
7496	148695_at	-0.890535	1.89169	-8.53724	1.08e-09	1.78e-08	11.778	FBgn0036342	CG11279	CG11279	CG11279	39486	---	---	---	---
6901	148100_at	-0.392051	-0.132143	-8.51314	1.15e-09	1.88e-08	11.7145	FBgn0035429	CG12017	CG12017	CG12017	38404	---	---	---	---
7566	148765_at	-0.658883	1.13237	-8.51343	1.15e-09	1.88e-08	11.7152	FBgn0036443	CG13471	CG13471	CG13471	39604	---	---	---	---
7562	148761_at	-0.450765	0.798119	-8.50619	1.17e-09	1.91e-08	11.6961	FBgn0036439	CG13474	CG13474	CG13474	39600	4001 // adenosine kinase activity // inferred from electronic annotation	6166 // purine ribonucleoside salvage // inferred from electronic annotation	---	---
9231	150430_at	-0.56256	-0.0292882	-8.50521	1.17e-09	1.91e-08	11.6935	FBgn0039060	CG13836	CG13836	CG13836	42741	---	---	---	---
7066	148265_at	-0.692941	1.70224	-8.50471	1.17e-09	1.91e-08	11.6922	FBgn0035679	CG10467	CG10467	CG10467	38697	4034 // aldose 1-epimerase activity // inferred from sequence or structural similarity /// 4034 // aldose 1-epimerase activity // inferred from electronic annotation /// 4034 // aldose 1-epimerase activity // inferred from sequence similarity	5996 // monosaccharide metabolism // inferred from electronic annotation /// 6012 // galactose metabolism // inferred from electronic annotation	---	IPR008183 // Aldose 1-epimerase // 1.0E-126
7955	149154_at	-0.774577	1.05047	-8.49671	1.2e-09	1.95e-08	11.6711	FBgn0037036	CG10586	CG10586	CG10586	40315	4175 // endopeptidase activity // inferred from sequence or structural similarity /// 4263 // chymotrypsin activity // inferred from electronic annotation /// 4295 // trypsin activity // non-traceable author statement /// 4252 // serine-type endopeptidase activity // inferred from electronic annotation /// 4175 // endopeptidase activity // inferred from sequence similarity	6508 // proteolysis // non-traceable author statement /// 6508 // proteolysis // inferred from electronic annotation	---	IPR001254 // Peptidase S1, chymotrypsin // 2.2E-54
12383	153582_at	-0.595428	1.96147	-8.48977	1.22e-09	1.98e-08	11.6528	FBgn0032084	CG13101	CG13101	CG13101	34221	---	7275 // development // inferred from electronic annotation /// 7498 // mesoderm development // inferred from electronic annotation /// 7517 // muscle development // inferred from electronic annotation	---	---
8589	149788_at	-0.639176	2.09823	-8.48106	1.25e-09	2.02e-08	11.6298	FBgn0038067	CG11598	CG11598	CG11598	41554	4806 // triacylglycerol lipase activity // inferred from sequence or structural similarity /// 16298 // lipase activity // inferred from sequence or structural similarity /// 3824 // catalytic activity // inferred from electronic annotation /// 16787 // hydrolase activity // inferred from electronic annotation /// 16789 // carboxylic ester hydrolase activity // inferred from electronic annotation…	6629 // lipid metabolism // inferred from electronic annotation /// 6629 // lipid metabolism // inferred from sequence or structural similarity /// 16042 // lipid catabolism // inferred from electronic annotation /// 6629 // lipid metabolism // inferred from sequence similarity	---	IPR000073 // Alpha/beta hydrolase fold // 2.2E-14 /// IPR006693 // Ab-hydrolase associated lipase region // 3.7E-19 /// IPR000073 // Alpha/beta hydrolase fold // 2.2E-14 /// IPR006693 // Ab-hydrolase associated lipase region // 1.7E-20
2528	143727_at	-0.564825	0.204528	-8.47966	1.25e-09	2.03e-08	11.6261	FBgn0013813	CG1842	Dhc98D	Dynein heavy chain at 89D	43379	3735 // structural constituent of ribosome // inferred from electronic annotation /// 3774 // motor activity // inferred from sequence or structural similarity /// 3777 // microtubule motor activity // inferred from electronic annotation /// 5200 // structural constituent of cytoskeleton // inferred from electronic annotation /// 42623 // ATPase activity, coupled // inferred from sequence or stru…	6412 // protein biosynthesis // inferred from electronic annotation /// 6928 // cell motility // inferred from electronic annotation /// 7018 // microtubule-based movement // inferred from sequence or structural similarity /// 7018 // microtubule-based movement // inferred from electronic annotation /// 7018 // microtubule-based movement // inferred from sequence similarity	5840 // ribosome // inferred from electronic annotation /// 5858 // axonemal dynein complex // inferred from sequence or structural similarity /// 5875 // microtubule associated complex // inferred from sequence or structural similarity /// 5875 // microtubule associated complex // non-traceable author statement /// 30286 // dynein complex // inferred from electronic annotation /// 5858 // axonem…	IPR004273 // Dynein heavy chain // 1.0E-126 /// IPR004273 // Dynein heavy chain // 1.0E-126
10107	151306_at	-0.701225	2.34611	-8.47577	1.26e-09	2.04e-08	11.6159	FBgn0040832	CG8012	CG8012	CG8012	50305	---	---	---	---
9429	150628_at	-0.56889	1.41773	-8.47385	1.27e-09	2.05e-08	11.6108	FBgn0039390	CG8932	CG8932	CG8932	43137	8324 // cation transporter activity // inferred from electronic annotation /// 8523 // sodium-dependent multivitamin transporter activity // inferred from sequence or structural similarity /// 5515 // protein binding // inferred from physical interaction /// 5215 // transporter activity // inferred from electronic annotation /// 8523 // sodium-dependent multivitamin transporter activity // inferr…	6732 // coenzyme metabolism // inferred from electronic annotation /// 6812 // cation transport // inferred from electronic annotation /// 6858 // extracellular transport // inferred from electronic annotation /// 51189 // prosthetic group metabolism // inferred from electronic annotation /// 6810 // transport // inferred from electronic annotation /// 6811 // ion transport // inferred from elect…	16020 // membrane // inferred from electronic annotation /// 16021 // integral to membrane // inferred from electronic annotation	---
11686	152885_at	-0.756134	1.39038	-8.46957	1.29e-09	2.07e-08	11.5995	FBgn0038919	CG17843	CG17843	CG17843	42583	15926 // glucosidase activity // inferred from electronic annotation /// 16491 // oxidoreductase activity // inferred from sequence or structural similarity /// 16971 // flavin-linked sulfhydryl oxidase activity // inferred from sequence or structural similarity /// 16491 // oxidoreductase activity // inferred from sequence similarity /// 16971 // flavin-linked sulfhydryl oxidase activity // infe…	6118 // electron transport // inferred from electronic annotation	---	IPR006863 // Erv1/Alr // 4.2E-50
2329	143528_at	-0.773932	3.40366	-8.45877	1.32e-09	2.12e-08	11.5709	FBgn0004879	CG1093	plx	pollux	40704	5083 // small GTPase regulator activity // inferred from electronic annotation	7155 // cell adhesion // inferred from electronic annotation	---	IPR000195 // RabGAP/TBC domain // 2.9E-27 /// IPR000195 // RabGAP/TBC domain // 2.9E-27
966	142165_at	-0.787322	3.7226	-8.44086	1.39e-09	2.22e-08	11.5236	FBgn0031245	CG3625	CG3625	CG3625	33198	---	---	---	IPR006838 // FAR-17a/AIG1-like protein // 6.7E-120 /// IPR006838 // FAR-17a/AIG1-like protein // 8.1E-119
569	141768_at	-0.600398	3.47915	-8.42803	1.43e-09	2.29e-08	11.4896	FBgn0022708	CG3140	Adk2	Adenylate kinase-2	37834	4017 // adenylate kinase activity // inferred from sequence or structural similarity /// 5524 // ATP binding // inferred from electronic annotation /// 5515 // protein binding // inferred from physical interaction /// 4017 // adenylate kinase activity // inferred from electronic annotation /// 16301 // kinase activity // inferred from electronic annotation /// 16740 // transferase activity // inf…	6144 // purine base metabolism // inferred from electronic annotation /// 6172 // ADP biosynthesis // inferred from sequence or structural similarity /// 6139 // nucleobase, nucleoside, nucleotide and nucleic acid metabolism // inferred from electronic annotation /// 6172 // ADP biosynthesis // inferred from sequence similarity	5739 // mitochondrion // inferred from sequence or structural similarity /// 5758 // mitochondrial intermembrane space // inferred from sequence or structural similarity /// 5739 // mitochondrion // inferred from sequence similarity /// 5758 // mitochondrial intermembrane space // inferred from sequence similarity	IPR000850 // Adenylate kinase // 5.8E-94 /// IPR007862 // Adenylate kinase, lid region // 2.3E-23
5318	146517_at	-0.892469	-0.172824	-8.42596	1.44e-09	2.3e-08	11.4841	FBgn0032826	CG33316	CG33316	CG33316	2768936	---	---	---	---
10754	151953_at	-0.456244	0.923448	-8.41646	1.48e-09	2.36e-08	11.459	FBgn0030562	CG9400	CG9400	CG9400	32385	---	6952 // defense response // inferred from electronic annotation /// 8152 // metabolism // inferred from electronic annotation	5576 // extracellular region // inferred from electronic annotation	IPR001283 // Allergen V5/Tpx-1 related // 1.1E-43
11451	152650_at	-0.567585	1.37422	-8.4055	1.52e-09	2.42e-08	11.43	FBgn0032495	CG16820	CG16820	CG16820	34730	---	---	---	IPR004272 // Odorant binding protein // 2.6E-44
11315	152514_at	-0.497374	1.20893	-8.39242	1.57e-09	2.5e-08	11.3953	FBgn0038716	CG7342	CG7342	CG7342	42335	8513 // organic cation porter activity // inferred from sequence or structural similarity /// 15144 // carbohydrate transporter activity // inferred from electronic annotation /// 8513 // organic cation porter activity // inferred from sequence similarity	6812 // cation transport // inferred from electronic annotation /// 6858 // extracellular transport // inferred from electronic annotation	16021 // integral to membrane // inferred from electronic annotation	IPR005828 // General substrate transporter // 9.9E-10
3365	144564_at	-0.649666	0.282428	-8.36736	1.68e-09	2.66e-08	11.3288	FBgn0029827	CG6048	CG6048	CG6048	31528	4252 // serine-type endopeptidase activity // inferred from sequence or structural similarity /// 4263 // chymotrypsin activity // inferred from electronic annotation /// 4295 // trypsin activity // non-traceable author statement /// 4252 // serine-type endopeptidase activity // inferred from electronic annotation /// 8233 // peptidase activity // inferred from electronic annotation /// 16787 // …	6508 // proteolysis // non-traceable author statement /// 6952 // defense response // inferred from electronic annotation /// 6508 // proteolysis // inferred from electronic annotation	---	IPR001254 // Peptidase S1, chymotrypsin // 1.3E-68
5474	146673_at	-1.09058	1.42218	-8.36276	1.7e-09	2.69e-08	11.3166	FBgn0033067	CG11211	CG11211	CG11211	35545	5537 // mannose binding // inferred from sequence or structural similarity /// 5529 // sugar binding // inferred from electronic annotation /// 5537 // mannose binding // inferred from sequence similarity	---	---	IPR001304 // C-type lectin // 1.9E-14
2911	144110_at	-0.452099	0.242723	-8.3538	1.74e-09	2.74e-08	11.2928	FBgn0026058	CG6352	OdsH	Ods-site homeobox	32758	3700 // transcription factor activity // non-traceable author statement /// 3677 // DNA binding // inferred from electronic annotation /// 3700 // transcription factor activity // inferred from electronic annotation /// 43565 // sequence-specific DNA binding // inferred from electronic annotation	6357 // regulation of transcription from RNA polymerase II promoter // inferred from electronic annotation /// 45449 // regulation of transcription // non-traceable author statement /// 6355 // regulation of transcription, DNA-dependent // inferred from electronic annotation /// 7275 // development // inferred from electronic annotation /// 45449 // regulation of transcription // inferred from el…	5634 // nucleus // non-traceable author statement /// 5634 // nucleus // inferred from electronic annotation	IPR001356 // Homeobox // 1.7E-29 /// IPR001356 // Homeobox // 1.7E-29
8853	150052_at	-0.562555	0.436258	-8.3533	1.74e-09	2.74e-08	11.2915	FBgn0051267	CG31267	CG31267	CG31267	318651	4252 // serine-type endopeptidase activity // inferred from sequence or structural similarity /// 4263 // chymotrypsin activity // inferred from electronic annotation /// 4295 // trypsin activity // inferred from electronic annotation /// 4252 // serine-type endopeptidase activity // inferred from electronic annotation /// 4252 // serine-type endopeptidase activity // inferred from sequence simil…	6508 // proteolysis // inferred from electronic annotation	---	IPR001254 // Peptidase S1, chymotrypsin // 3.6E-50
12061	153260_at	-0.681529	2.29434	-8.35042	1.76e-09	2.76e-08	11.2839	FBgn0026061	CG4123	Mipp1	Multiple inositol polyphosphate phosphatase 1	39841	3993 // acid phosphatase activity // inferred from electronic annotation /// 4437 // inositol or phosphatidylinositol phosphatase activity // inferred from sequence or structural similarity /// 4721 // phosphoprotein phosphatase activity // non-traceable author statement /// 4437 // inositol or phosphatidylinositol phosphatase activity // inferred from sequence similarity	---	---	---
6081	147280_at	-0.618968	2.01093	-8.34045	1.8e-09	2.82e-08	11.2573	FBgn0034076	CG8424	CG8424	CG8424	36779	4091 // carboxylesterase activity // inferred from sequence or structural similarity /// 3824 // catalytic activity // inferred from electronic annotation /// 4759 // serine esterase activity // inferred from electronic annotation /// 16787 // hydrolase activity // inferred from electronic annotation /// 4091 // carboxylesterase activity // inferred from sequence similarity	7165 // signal transduction // inferred from electronic annotation /// 7267 // cell-cell signaling // inferred from electronic annotation	---	IPR002018 // Carboxylesterase, type B // 1.0E-126
5922	147121_at	-0.645687	0.55303	-8.33981	1.81e-09	2.82e-08	11.2556	FBgn0050488	CG30488	CG30488	CG30488	246647	---	6952 // defense response // inferred from electronic annotation	5576 // extracellular region // inferred from sequence or structural similarity /// 5576 // extracellular region // inferred from electronic annotation /// 5576 // extracellular region // inferred from sequence similarity	IPR001283 // Allergen V5/Tpx-1 related // 8.1E-7
2962	144161_r_at	-0.641496	4.95237	-8.33669	1.82e-09	2.84e-08	11.2474	FBgn0011227	CG8764	ox	oxen	45401	8121 // ubiquinol-cytochrome-c reductase activity // inferred from sequence or structural similarity /// 8121 // ubiquinol-cytochrome-c reductase activity // non-traceable author statement /// 8121 // ubiquinol-cytochrome-c reductase activity // inferred from electronic annotation /// 8121 // ubiquinol-cytochrome-c reductase activity // inferred from sequence similarity	6122 // mitochondrial electron transport, ubiquinol to cytochrome c // inferred from sequence or structural similarity /// 7286 // spermatid development // inferred from mutant phenotype /// 6122 // mitochondrial electron transport, ubiquinol to cytochrome c // inferred from electronic annotation /// 6122 // mitochondrial electron transport, ubiquinol to cytochrome c // inferred from sequence sim…	5750 // respiratory chain complex III (sensu Eukaryota) // inferred from sequence or structural similarity /// 5750 // respiratory chain complex III (sensu Eukaryota) // non-traceable author statement /// 5740 // mitochondrial envelope // inferred from electronic annotation /// 5750 // respiratory chain complex III (sensu Eukaryota) // inferred from sequence similarity	IPR008027 // Ubiquinol-cytochrome C reductase, UQCRXQCR9 like // 2.3E-32 /// IPR008027 // Ubiquinol-cytochrome C reductase, UQCRXQCR9 like // 5.4E-33
11654	152853_at	-0.756293	0.95947	-8.32347	1.89e-09	2.94e-08	11.2122	FBgn0051149	CG31149	CG31149	CG31149	42269	---	---	---	IPR002172 // Low density lipoprotein-receptor, class A // 3.4E-7 /// IPR000859 // CUB // 1.3E-16 /// IPR000859 // CUB // 1.2E-6 /// IPR000859 // CUB // 7.1E-24 /// IPR000859 // CUB // 2.4E-18
5933	147132_at	-0.630888	1.48996	-8.32173	1.89e-09	2.95e-08	11.2076	FBgn0033807 /// FBgn0011211	CG12251	AQP /// blw	aquaporin /// bellwether	36456 /// 37617	5372 // water transporter activity // non-traceable author statement /// 5515 // protein binding // inferred from physical interaction /// 166 // nucleotide binding // inferred from electronic annotation /// 5524 // ATP binding // inferred from electronic annotation /// 15078 // hydrogen ion transporter activity // inferred from electronic annotation /// 16787 // hydrolase activity // inferred fr…	6833 // water transport // non-traceable author statement /// 7286 // spermatid development // inferred from mutant phenotype /// 40007 // growth // inferred from mutant phenotype /// 6754 // ATP biosynthesis // inferred from electronic annotation /// 6810 // transport // inferred from electronic annotation /// 6811 // ion transport // inferred from electronic annotation /// 15986 // ATP synthesi…	5739 // mitochondrion // inferred from electronic annotation /// 16469 // proton-transporting two-sector ATPase complex // inferred from electronic annotation /// 45261 // proton-transporting ATP synthase complex, catalytic core F(1) // inferred from electronic annotation /// 16021 // integral to membrane // inferred from electronic annotation /// 19867 // outer membrane // inferred from electron…	IPR004100 // H+-transporting two-sector ATPase, alpha/beta subunit, N-terminal // 1.4E-25 /// IPR000194 // H+-transporting two-sector ATPase, alpha/beta subunit, central region // 3.2E-109 /// IPR000793 // H+-transporting two-sector ATPase, alpha/beta subunit, C-terminal // 1.1E-42
10459	151658_at	-0.644302	3.46536	-8.32147	1.9e-09	2.95e-08	11.2069	FBgn0027356	CG8604	Amph	Amphiphysin	36383	5515 // protein binding // inferred from electronic annotation /// 5515 // protein binding // inferred from physical interaction	6886 // intracellular protein transport // inferred from electronic annotation /// 6887 // exocytosis // traceable author statement /// 6897 // endocytosis // non-traceable author statement /// 6898 // receptor mediated endocytosis // inferred from electronic annotation /// 6937 // regulation of muscle contraction // inferred from mutant phenotype /// 7269 // neurotransmitter secretion // non-tra…	5737 // cytoplasm // inferred from electronic annotation /// 5886 // plasma membrane // inferred from direct assay /// 45202 // synapse // inferred from direct assay	IPR004148 // BAR domain // 1.4E-126 /// IPR001452 // SH3 // 8.3E-15
10410	151609_at	-0.912072	2.64814	-8.31801	1.91e-09	2.97e-08	11.1977	---	---	---	---	---	---	---	---	---
7639	148838_at	-0.404819	0.481793	-8.31452	1.93e-09	3e-08	11.1884	FBgn0036552	CG17028	CG17028	CG17028	39741	8934 // inositol-1(or 4)-monophosphatase activity // inferred from sequence or structural similarity /// 8934 // inositol-1(or 4)-monophosphatase activity // non-traceable author statement /// 4437 // inositol or phosphatidylinositol phosphatase activity // inferred from electronic annotation /// 8934 // inositol-1(or 4)-monophosphatase activity // inferred from sequence similarity	6644 // phospholipid metabolism // inferred from electronic annotation /// 7242 // intracellular signaling cascade // inferred from electronic annotation /// 16311 // dephosphorylation // non-traceable author statement	---	IPR000760 // Inositol monophosphatase // 1.5E-88
1068	142267_at	-0.492263	-0.193029	-8.3114	1.95e-09	3.02e-08	11.1801	FBgn0052635	CG32635	CG32635	CG32635	32303	4872 // receptor activity // inferred from electronic annotation /// 17026 // procollagen C-endopeptidase activity // inferred from sequence or structural similarity /// 5515 // protein binding // inferred from physical interaction /// 17026 // procollagen C-endopeptidase activity // inferred from sequence similarity	6508 // proteolysis // inferred from electronic annotation /// 6732 // coenzyme metabolism // inferred from electronic annotation /// 6810 // transport // inferred from electronic annotation /// 51189 // prosthetic group metabolism // inferred from electronic annotation	---	IPR000859 // CUB // 1.2E-32 /// IPR000859 // CUB // 5.8E-10
10516	151715_at	-0.539932	2.07023	-8.30772	1.97e-09	3.04e-08	11.1703	---	---	---	---	---	---	---	---	---
11710	152909_at	-0.552902	1.90214	-8.27983	2.12e-09	3.25e-08	11.096	FBgn0051116	CG31116	CG31116	CG31116	41428	5247 // voltage-gated chloride channel activity // inferred from electronic annotation /// 5254 // chloride channel activity // inferred from sequence or structural similarity /// 5254 // chloride channel activity // inferred from sequence similarity	6821 // chloride transport // inferred from sequence or structural similarity /// 6821 // chloride transport // inferred from electronic annotation /// 6821 // chloride transport // inferred from sequence similarity	16020 // membrane // inferred from electronic annotation	IPR000644 // CBS domain // 0.0012 /// IPR000644 // CBS domain // 4.2E-4 /// IPR001807 // Cl- channel, voltage gated // 1.0E-126 /// IPR000644 // CBS domain // 4.2E-4 /// IPR000644 // CBS domain // 0.0012 /// IPR000644 // CBS domain // 4.2E-4 /// IPR001807 // Cl- channel, voltage gated // 1.0E-126
3868	145067_at	-0.796173	0.11912	-8.27123	2.16e-09	3.31e-08	11.0731	FBgn0052600	CG32600	dpr8	dpr8	32387	---	7275 // development // inferred from electronic annotation	5727 // extrachromosomal circular DNA // inferred from electronic annotation /// 16020 // membrane // inferred from electronic annotation /// 16021 // integral to membrane // inferred from electronic annotation	IPR007110 // Immunoglobulin-like // 2.0E-5 /// IPR007110 // Immunoglobulin-like // 2.1E-7
8672	149871_at	-0.561934	2.79182	-8.2624	2.22e-09	3.38e-08	11.0495	FBgn0038198	CG3153	CG3153	CG3153	41710	5102 // receptor binding // inferred from electronic annotation	---	---	IPR003172 // E1 protein and Def2/Der2 allergen // 3.7E-43
3107	144306_at	-0.508358	1.52357	-8.258	2.24e-09	3.42e-08	11.0378	FBgn0028915	CG7532	CG7532	CG7532	34838	4252 // serine-type endopeptidase activity // inferred from sequence or structural similarity /// 4252 // serine-type endopeptidase activity // inferred from sequence similarity	---	---	IPR002861 // Reeler region // 8.5E-11
498	141697_at	-0.735137	3.78234	-8.25749	2.24e-09	3.42e-08	11.0364	FBgn0010225	CG1106	Gel	Gelsolin	46008	3779 // actin binding // inferred from sequence or structural similarity /// 5200 // structural constituent of cytoskeleton // inferred from electronic annotation /// 5351 // sugar porter activity // inferred from electronic annotation /// 3779 // actin binding // inferred from electronic annotation /// 5509 // calcium ion binding // inferred from electronic annotation /// 3779 // actin binding /…	7010 // cytoskeleton organization and biogenesis // inferred from electronic annotation /// 9401 // phosphoenolpyruvate-dependent sugar phosphotransferase system // inferred from electronic annotation /// 30041 // actin filament polymerization // inferred from sequence or structural similarity	5576 // extracellular region // inferred from direct assay /// 5829 // cytosol // inferred from direct assay /// 5884 // actin filament // inferred from direct assay /// 5576 // extracellular region // inferred from expression pattern /// 5829 // cytosol // inferred from expression pattern /// 5856 // cytoskeleton // inferred from electronic annotation	IPR007123 // Gelsolin region // 5.9E-16 /// IPR007123 // Gelsolin region // 8.6E-15 /// IPR007123 // Gelsolin region // 2.6E-16 /// IPR007123 // Gelsolin region // 1.9E-7 /// IPR007123 // Gelsolin region // 7.5E-14 /// IPR007123 // Gelsolin region // 5.9E-16 /// IPR007123 // Gelsolin region // 8.6E-15 /// IPR007123 // Gelsolin region // 2.6E-16 /// IPR007123 // Gelsolin region // 1.9E-7 /// IPR00…
7354	148553_at	-0.760037	1.29713	-8.2476	2.3e-09	3.5e-08	11.0101	FBgn0052072	CG32072	CG32072	CG32072	---	9922 // fatty acid elongase activity // inferred from direct assay /// 8415 // acyltransferase activity // inferred from electronic annotation	19368 // fatty acid elongation, unsaturated fatty acid // inferred from direct assay /// 42811 // pheromone biosynthesis // inferred from mutant phenotype /// 38 // very-long-chain fatty acid metabolism // inferred from sequence similarity /// 6633 // fatty acid biosynthesis // inferred from sequence similarity	16021 // integral to membrane // inferred from electronic annotation /// 5783 // endoplasmic reticulum // inferred from sequence similarity	IPR002076 // GNS1/SUR4 membrane protein // 1.2E-19 /// IPR002076 // GNS1/SUR4 membrane protein // 1.2E-19
10483	151682_at	-0.82697	3.41513	-8.24772	2.3e-09	3.5e-08	11.0104	FBgn0000251	CG1759	cad	caudal	35341	3677 // DNA binding // inferred from electronic annotation /// 3700 // transcription factor activity // inferred from electronic annotation /// 3702 // RNA polymerase II transcription factor activity // non-traceable author statement /// 3704 // specific RNA polymerase II transcription factor activity // non-traceable author statement /// 16563 // transcriptional activator activity // inferred fr…	6357 // regulation of transcription from RNA polymerase II promoter // inferred from electronic annotation /// 7377 // germ-band extension // inferred from mutant phenotype /// 7379 // segment specification // inferred from mutant phenotype /// 7442 // hindgut morphogenesis // inferred from mutant phenotype /// 7442 // hindgut morphogenesis // traceable author statement /// 7443 // Malpighian tub…	5634 // nucleus // inferred from direct assay /// 5634 // nucleus // non-traceable author statement /// 5737 // cytoplasm // inferred from direct assay /// 5634 // nucleus // inferred from electronic annotation	IPR001356 // Homeobox // 2.8E-23
1842	143041_i_at	-0.700828	0.613355	-8.24069	2.35e-09	3.55e-08	10.9916	FBgn0029856	CG11700	CG11700	CG11700	31564	---	6508 // proteolysis // inferred from electronic annotation /// 19538 // protein metabolism // inferred from electronic annotation /// 50875 // cellular physiological process // inferred from mutant phenotype	---	IPR000626 // Ubiquitin // 1.4E-35 /// IPR000626 // Ubiquitin // 1.4E-35 /// IPR000626 // Ubiquitin // 7.4E-42 /// IPR000626 // Ubiquitin // 8.5E-35
11502	152701_at	-1.01383	2.16461	-8.24025	2.35e-09	3.55e-08	10.9904	FBgn0038865	CG10824	CG10824	CG10824	42512	4190 // aspartic-type endopeptidase activity // inferred from electronic annotation /// 4872 // receptor activity // inferred from electronic annotation	6508 // proteolysis // inferred from electronic annotation /// 6952 // defense response // inferred from electronic annotation /// 7155 // cell adhesion // inferred from electronic annotation /// 7165 // signal transduction // inferred from electronic annotation /// 7166 // cell surface receptor linked signal transduction // inferred from electronic annotation /// 19226 // transmission of nerve i…	---	IPR001611 // Leucine-rich repeat // 0.17 /// IPR001611 // Leucine-rich repeat // 0.0061 /// IPR001611 // Leucine-rich repeat // 0.0016 /// IPR001611 // Leucine-rich repeat // 0.0099 /// IPR001611 // Leucine-rich repeat // 0.071 /// IPR001611 // Leucine-rich repeat // 0.023 /// IPR001611 // Leucine-rich repeat // 1.2E-6
10342	151541_s_at	-0.391584	-0.146392	-8.23928	2.36e-09	3.56e-08	10.9878	FBgn0051619	CG31619	CG31619	CG31619	35424	17074 // procollagen N-endopeptidase activity // inferred from sequence or structural similarity /// 8233 // peptidase activity // inferred from electronic annotation /// 17074 // procollagen N-endopeptidase activity // inferred from sequence similarity	6508 // proteolysis // inferred from sequence or structural similarity /// 6952 // defense response // inferred from electronic annotation /// 7165 // signal transduction // inferred from electronic annotation /// 16337 // cell-cell adhesion // inferred from electronic annotation /// 6508 // proteolysis // inferred from sequence similarity	---	IPR000884 // Thrombospondin, type I // 1.2E-9 /// IPR000884 // Thrombospondin, type I // 4.9E-7 /// IPR007110 // Immunoglobulin-like // 1.4E-6
2950	144149_at	-0.611163	0.265288	-8.23656	2.37e-09	3.58e-08	10.9806	FBgn0026602	CG1851	Ady43A	Ady43A	44750	4001 // adenosine kinase activity // inferred from sequence or structural similarity /// 4001 // adenosine kinase activity // non-traceable author statement /// 19201 // nucleotide kinase activity // inferred from electronic annotation /// 5515 // protein binding // inferred from physical interaction /// 4001 // adenosine kinase activity // inferred from electronic annotation /// 4001 // adenosin…	6139 // nucleobase, nucleoside, nucleotide and nucleic acid metabolism // inferred from electronic annotation /// 6166 // purine ribonucleoside salvage // inferred from electronic annotation	---	IPR002173 // Carbohydrate kinase, PfkB // 8.2E-45
3373	144572_at	-0.861995	1.6928	-8.21573	2.51e-09	3.76e-08	10.9249	FBgn0029838	CG4666	CG4666	CG4666	31541	---	---	---	---
11100	152299_at	-0.663028	1.486	-8.21352	2.52e-09	3.77e-08	10.919	FBgn0035293	CG5687	CG5687	CG5687	38255	8324 // cation transporter activity // inferred from electronic annotation /// 8507 // sodium:iodide symporter activity // inferred from sequence or structural similarity /// 5215 // transporter activity // inferred from electronic annotation /// 8507 // sodium:iodide symporter activity // inferred from sequence similarity	6732 // coenzyme metabolism // inferred from electronic annotation /// 6812 // cation transport // inferred from electronic annotation /// 6858 // extracellular transport // inferred from electronic annotation /// 51189 // prosthetic group metabolism // inferred from electronic annotation /// 6810 // transport // inferred from electronic annotation	16020 // membrane // inferred from electronic annotation	---
2403	143602_at	-1.7901	4.36375	-8.2097	2.55e-09	3.81e-08	10.9088	FBgn0010357	CG18211	Try	Trypsin	47901	4263 // chymotrypsin activity // inferred from electronic annotation /// 4295 // trypsin activity // non-traceable author statement /// 4252 // serine-type endopeptidase activity // inferred from electronic annotation /// 4295 // trypsin activity // inferred from electronic annotation /// 8233 // peptidase activity // inferred from electronic annotation /// 16787 // hydrolase activity // inferred…	6508 // proteolysis // non-traceable author statement /// 6508 // proteolysis // inferred from electronic annotation	5576 // extracellular region // non-traceable author statement	IPR001254 // Peptidase S1, chymotrypsin // 2.8E-88
3979	145178_at	-1.478	3.26223	-8.19784	2.63e-09	3.92e-08	10.8771	FBgn0030737	CG9914	CG9914	CG9914	32592	5198 // structural molecule activity // inferred from electronic annotation /// 16491 // oxidoreductase activity // inferred from electronic annotation	6629 // lipid metabolism // inferred from electronic annotation /// 6631 // fatty acid metabolism // inferred from electronic annotation /// 7010 // cytoskeleton organization and biogenesis // inferred from electronic annotation	---	IPR006108 // 3-hydroxyacyl-CoA dehydrogenase, C-terminal // 1.4E-25 /// IPR006176 // 3-hydroxyacyl-CoA dehydrogenase, NAD binding domain // 2.0E-49
4003	145202_at	-0.973396	1.63979	-8.17995	2.76e-09	4.09e-08	10.8292	FBgn0030775	CG9673	CG9673	CG9673	32649	4252 // serine-type endopeptidase activity // non-traceable author statement /// 4263 // chymotrypsin activity // inferred from electronic annotation /// 4295 // trypsin activity // inferred from electronic annotation /// 4252 // serine-type endopeptidase activity // inferred from electronic annotation	6508 // proteolysis // inferred from electronic annotation	---	IPR001254 // Peptidase S1, chymotrypsin // 1.5E-54
8436	149635_at	-0.689584	1.49581	-8.1729	2.81e-09	4.16e-08	10.8103	FBgn0051391	CG31391	CG31391	CG31391	41280	---	---	---	---
13184	154383_at	-0.491555	2.74543	-8.15894	2.91e-09	4.31e-08	10.7729	FBgn0032721	CG10602	CG10602	CG10602	35146	4179 // membrane alanyl aminopeptidase activity // inferred from electronic annotation /// 4463 // leukotriene-A4 hydrolase activity // inferred from sequence or structural similarity /// 8237 // metallopeptidase activity // inferred from electronic annotation /// 8270 // zinc ion binding // inferred from electronic annotation /// 4463 // leukotriene-A4 hydrolase activity // inferred from sequenc…	6508 // proteolysis // inferred from electronic annotation /// 6952 // defense response // inferred from electronic annotation /// 7166 // cell surface receptor linked signal transduction // inferred from electronic annotation	---	IPR001930 // Peptidase M1, membrane alanine aminopeptidase // 4.6E-110 /// IPR001930 // Peptidase M1, membrane alanine aminopeptidase // 4.6E-110
8599	149798_at	-1.12731	1.09017	-8.15767	2.92e-09	4.32e-08	10.7695	FBgn0038082	CG5724	CG5724	CG5724	41573	15020 // glucuronosyltransferase activity // inferred from sequence or structural similarity /// 15020 // glucuronosyltransferase activity // inferred from sequence similarity	5976 // polysaccharide metabolism // inferred from electronic annotation /// 6952 // defense response // inferred from electronic annotation /// 8202 // steroid metabolism // inferred from electronic annotation /// 9636 // response to toxin // inferred from electronic annotation	---	IPR002213 // UDP-glucoronosyl/UDP-glucosyl transferase // 9.4E-41
1157	142356_at	-1.02981	5.20913	-8.15628	2.93e-09	4.33e-08	10.7658	FBgn0016724	CG11064	RfaBp	Retinoid- and fatty-acid binding protein	43827	5198 // structural molecule activity // inferred from sequence or structural similarity /// 5319 // lipid transporter activity // inferred from electronic annotation /// 5501 // retinoid binding // non-traceable author statement /// 5504 // fatty acid binding // non-traceable author statement /// 8017 // microtubule binding // inferred from direct assay /// 19841 // retinol binding // inferred fr…	6810 // transport // traceable author statement /// 6869 // lipid transport // inferred from electronic annotation /// 7224 // smoothened signaling pathway // inferred from mutant phenotype /// 16055 // Wnt receptor signaling pathway // inferred from mutant phenotype /// 6810 // transport // inferred from electronic annotation /// 16055 // Wnt receptor signaling pathway // inferred from electroni…	5576 // extracellular region // non-traceable author statement	IPR009454 // Protein of unknown function DUF1081 // 3.0E-55 /// IPR001846 // von Willebrand factor, type D // 2.9E-29 /// IPR001747 // Lipid transport protein, N-terminal // 7.1E-119
6182	147381_at	-0.430637	0.639112	-8.15486	2.95e-09	4.34e-08	10.762	FBgn0034251	CG11423	CG11423	CG11423	36998	8137 // NADH dehydrogenase (ubiquinone) activity // inferred from sequence or structural similarity /// 5506 // iron ion binding // inferred from electronic annotation /// 8137 // NADH dehydrogenase (ubiquinone) activity // inferred from electronic annotation /// 10181 // FMN binding // inferred from electronic annotation /// 16651 // oxidoreductase activity, acting on NADH or NADPH // inferred f…	6118 // electron transport // inferred from electronic annotation /// 6119 // oxidative phosphorylation // inferred from electronic annotation /// 6120 // mitochondrial electron transport, NADH to ubiquinone // inferred from electronic annotation	5747 // respiratory chain complex I (sensu Eukaryota) // inferred from sequence or structural similarity /// 5747 // respiratory chain complex I (sensu Eukaryota) // inferred from sequence similarity	IPR001949 // Respiratory-chain NADH dehydrogenase, 51 kDa subunit // 1.0E-126
1135	142334_at	-0.583544	0.896259	-8.15176	2.97e-09	4.37e-08	10.7537	FBgn0042131	CG18808	CG18808	CG18808	59169	16491 // oxidoreductase activity // inferred from electronic annotation	5975 // carbohydrate metabolism // inferred from electronic annotation /// 6099 // tricarboxylic acid cycle // inferred from electronic annotation /// 8152 // metabolism // inferred from electronic annotation	---	IPR003767 // Malate/L-lactate dehydrogenase // 5.3E-65
11170	152369_at	-1.28287	3.60346	-8.15055	2.98e-09	4.38e-08	10.7504	FBgn0032049	CG13095	CG13095	CG13095	34182	4190 // aspartic-type endopeptidase activity // inferred from sequence or structural similarity /// 4194 // pepsin A activity // inferred from electronic annotation /// 4190 // aspartic-type endopeptidase activity // inferred from electronic annotation /// 8233 // peptidase activity // inferred from electronic annotation /// 16787 // hydrolase activity // inferred from electronic annotation /// 4…	6508 // proteolysis // inferred from electronic annotation	---	IPR001461 // Peptidase A1, pepsin // 1.0E-126
7493	148692_at	-0.588766	0.0209892	-8.14932	2.99e-09	4.38e-08	10.7471	FBgn0036338	CG11253	CG11253	CG11253	39481	8270 // zinc ion binding // inferred from electronic annotation	---	---	IPR002893 // Zn-finger, MYND type // 3.4E-14
10955	152154_at	-0.714847	0.492284	-8.13974	3.07e-09	4.48e-08	10.7214	FBgn0031970	CG7227	CG7227	CG7227	34088	5044 // scavenger receptor activity // non-traceable author statement	6915 // apoptosis // inferred from electronic annotation /// 6952 // defense response // non-traceable author statement /// 7155 // cell adhesion // inferred from electronic annotation /// 42116 // macrophage activation // inferred from electronic annotation	5887 // integral to plasma membrane // non-traceable author statement /// 16020 // membrane // inferred from electronic annotation	IPR002159 // CD36 antigen // 1.1E-60
1752	142951_at	-1.59258	2.99316	-8.12576	3.18e-09	4.64e-08	10.6839	FBgn0028534	CG7916	CG7916	CG7916	34800	5515 // protein binding // inferred from physical interaction	---	---	---
7549	148748_at	-0.858706	1.19037	-8.12382	3.2e-09	4.66e-08	10.6787	FBgn0036421	CG13481	CG13481	CG13481	39579	5515 // protein binding // inferred from electronic annotation /// 8270 // zinc ion binding // inferred from electronic annotation /// 46872 // metal ion binding // inferred from electronic annotation	6512 // ubiquitin cycle // inferred from electronic annotation	5634 // nucleus // inferred from electronic annotation	---
6980	148179_at	-0.600208	0.0375791	-8.11991	3.23e-09	4.7e-08	10.6682	FBgn0035548	CG15023	CG15023	CG15023	38550	---	---	---	---
11379	152578_at	-0.621103	0.540449	-8.11204	3.3e-09	4.79e-08	10.6471	FBgn0037003	CG18281	CG18281	CG18281	40274	5215 // transporter activity // inferred from electronic annotation /// 15520 // tetracycline:hydrogen antiporter activity // inferred from electronic annotation	5975 // carbohydrate metabolism // inferred from electronic annotation /// 6810 // transport // inferred from electronic annotation /// 8643 // carbohydrate transport // inferred from electronic annotation /// 15904 // tetracycline transport // inferred from electronic annotation	16021 // integral to membrane // inferred from electronic annotation	---
5446	146645_at	-0.959025	3.95753	-8.10237	3.39e-09	4.9e-08	10.6211	FBgn0033027 /// FBgn0068016	CG12408	TpnC4 /// DyakTpnC4	TpnC4 /// TpnC4	35498	5509 // calcium ion binding // inferred from sequence or structural similarity /// 5509 // calcium ion binding // non-traceable author statement /// 5516 // calmodulin binding // inferred from electronic annotation /// 5515 // protein binding // inferred from physical interaction /// 5509 // calcium ion binding // inferred from electronic annotation /// 5509 // calcium ion binding // inferred fro…	1539 // ciliary or flagellar motility // inferred from electronic annotation /// 6936 // muscle contraction // inferred from electronic annotation /// 19722 // calcium-mediated signaling // inferred from electronic annotation	9288 // flagellum (sensu Bacteria) // inferred from electronic annotation	IPR002048 // Calcium-binding EF-hand // 0.025 /// IPR002048 // Calcium-binding EF-hand // 0.0076 /// IPR002048 // Calcium-binding EF-hand // 4.0E-5 /// IPR002048 // Calcium-binding EF-hand // 1.2E-6
4344	145543_at	-1.08131	1.56394	-8.09712	3.43e-09	4.96e-08	10.607	FBgn0040107	CG2826	lectin-21Ca	lectin-21Ca	53552	5534 // galactose binding // inferred from sequence or structural similarity /// 5534 // galactose binding // inferred from sequence similarity	7283 // spermatogenesis // inferred from electronic annotation	---	IPR001304 // C-type lectin // 3.9E-10
572	141771_at	-0.618214	1.49505	-8.09389	3.46e-09	5e-08	10.5983	FBgn0050456	CG30456	CG30456	CG30456	36929	5085 // guanyl-nucleotide exchange factor activity // inferred from electronic annotation	---	---	IPR000219 // DH domain // 2.6E-5 /// IPR000219 // DH domain // 7.1E-5
3978	145177_at	-0.668614	4.27143	-8.0896	3.5e-09	5.05e-08	10.5868	FBgn0030733	CG3560	CG3560	CG3560	32586	8121 // ubiquinol-cytochrome-c reductase activity // inferred from sequence or structural similarity /// 5515 // protein binding // inferred from physical interaction /// 8121 // ubiquinol-cytochrome-c reductase activity // inferred from electronic annotation /// 8121 // ubiquinol-cytochrome-c reductase activity // inferred from sequence similarity	6122 // mitochondrial electron transport, ubiquinol to cytochrome c // inferred from sequence or structural similarity /// 6118 // electron transport // inferred from electronic annotation /// 6122 // mitochondrial electron transport, ubiquinol to cytochrome c // inferred from electronic annotation /// 6122 // mitochondrial electron transport, ubiquinol to cytochrome c // inferred from sequence s…	5750 // respiratory chain complex III (sensu Eukaryota) // inferred from sequence or structural similarity /// 5750 // respiratory chain complex III (sensu Eukaryota) // inferred from sequence similarity	IPR003197 // Cytochrome bd ubiquinol oxidase, 14 kDa subunit // 1.2E-48
9183	150382_at	-0.610652	2.16575	-8.0869	3.53e-09	5.08e-08	10.5796	FBgn0038993	CG13843	CG13843	CG13843	42668	5515 // protein binding // inferred from physical interaction	---	---	---
11289	152488_at	-0.699169	3.23538	-8.08648	3.53e-09	5.08e-08	10.5784	FBgn0040502	CG8343	CG8343	CG8343	35544	5537 // mannose binding // inferred from sequence or structural similarity /// 5529 // sugar binding // inferred from electronic annotation /// 5537 // mannose binding // inferred from sequence similarity	---	---	IPR001304 // C-type lectin // 2.5E-17
11659	152858_at	-0.559419	1.22888	-8.08216	3.57e-09	5.13e-08	10.5668	FBgn0003302	CG4336	rux	roughex	31535	---	74 // regulation of progression through cell cycle // inferred from mutant phenotype /// 278 // mitotic cell cycle // inferred from mutant phenotype /// 7088 // regulation of mitosis // non-traceable author statement /// 7096 // regulation of exit from mitosis // traceable author statement /// 7455 // eye-antennal disc morphogenesis // non-traceable author statement /// 7456 // eye development (s…	5634 // nucleus // inferred from direct assay	IPR009259 // Drosophila roughex // 1.0E-126
2139	143338_f_at	-1.64996	5.2732	-8.076	3.63e-09	5.2e-08	10.5502	FBgn0003356 /// FBgn0003357	CG31362 /// CG31034	Jon99Cii /// Jon99Ciii	Jonah 99Cii /// Jonah 99Ciii	43543 /// 43544	4252 // serine-type endopeptidase activity // inferred from sequence or structural similarity /// 4252 // serine-type endopeptidase activity // non-traceable author statement /// 4263 // chymotrypsin activity // non-traceable author statement /// 4295 // trypsin activity // inferred from electronic annotation /// 8236 // serine-type peptidase activity // non-traceable author statement /// 5515 //…	6508 // proteolysis // non-traceable author statement /// 7586 // digestion // non-traceable author statement /// 6508 // proteolysis // inferred from electronic annotation	---	IPR001254 // Peptidase S1, chymotrypsin // 1.1E-57 /// IPR001254 // Peptidase S1, chymotrypsin // 1.2E-22
2756	143955_at	-0.918961	3.54983	-8.04819	3.91e-09	5.56e-08	10.4754	FBgn0053521	CG33521	CG33521	CG33521	3346141	8270 // zinc ion binding // inferred from electronic annotation /// 46872 // metal ion binding // inferred from electronic annotation	---	---	IPR001781 // Zn-binding protein, LIM // 2.2E-7 /// IPR001781 // Zn-binding protein, LIM // 2.2E-7
4691	145890_at	-1.05179	2.18474	-8.04638	3.93e-09	5.58e-08	10.4705	FBgn0031801	CG9498	CG9498	CG9498	33885	16301 // kinase activity // inferred from electronic annotation /// 16740 // transferase activity // inferred from electronic annotation	---	---	IPR004119 // Protein of unknown function DUF227 // 5.8E-109
13773	154972_at	-0.496445	0.97847	-8.03927	4.01e-09	5.68e-08	10.4513	FBgn0037664	CG8420	CG8420	CG8420	41097	---	---	---	---
12244	153443_at	-0.847112	1.95541	-8.03756	4.02e-09	5.7e-08	10.4467	FBgn0038925	CG6022	CG6022	CG6022	42590	4408 // holocytochrome-c synthase activity // inferred from sequence or structural similarity /// 5515 // protein binding // inferred from physical interaction /// 4408 // holocytochrome-c synthase activity // inferred from electronic annotation /// 4408 // holocytochrome-c synthase activity // inferred from sequence similarity	6732 // coenzyme metabolism // inferred from electronic annotation /// 18063 // cytochrome c-heme linkage // inferred from sequence or structural similarity /// 18063 // cytochrome c-heme linkage // inferred from sequence similarity	5743 // mitochondrial inner membrane // inferred from sequence or structural similarity /// 5739 // mitochondrion // inferred from electronic annotation /// 5743 // mitochondrial inner membrane // inferred from sequence similarity	IPR000511 // Cytochrome c and c1 heme-lyase // 4.5E-118
11727	152926_at	-0.736656	5.84378	-8.02638	4.15e-09	5.86e-08	10.4166	FBgn0040992	CG10570	CG10570	CG10570	50466	5515 // protein binding // inferred from physical interaction	---	---	---
5710	146909_at	-0.567199	0.78827	-8.02213	4.19e-09	5.92e-08	10.4051	FBgn0033461	CG12923	CG12923	CG12923	36026	---	---	---	---
10059	151258_at	-0.550311	-0.198619	-8.00742	4.36e-09	6.15e-08	10.3655	FBgn0053255	CG33255	CG33255	CG33255	2768959	---	---	---	---
5220	146419_at	-0.646824	1.60782	-7.99742	4.48e-09	6.3e-08	10.3385	FBgn0032658	CG5681	CG5681	CG5681	35074	---	---	---	---
61	141260_at	-0.70296	3.54619	-7.98326	4.65e-09	6.53e-08	10.3003	FBgn0038738 /// FBgn0064427	CG4572	CG4572 /// DpseGA18267	CG4572 /// GA18267	42360	4185 // serine carboxypeptidase activity // inferred from sequence or structural similarity /// 3824 // catalytic activity // inferred from electronic annotation /// 4185 // serine carboxypeptidase activity // inferred from electronic annotation /// 4185 // serine carboxypeptidase activity // inferred from sequence similarity	6508 // proteolysis // inferred from electronic annotation	---	IPR001563 // Peptidase S10, serine carboxypeptidase // 1.4E-65 /// IPR001563 // Peptidase S10, serine carboxypeptidase // 1.3E-21
7805	149004_at	-0.6751	0.855318	-7.97439	4.77e-09	6.66e-08	10.2763	---	---	---	---	---	4656 // procollagen-proline 4-dioxygenase activity // inferred from sequence or structural similarity /// 5488 // binding // inferred from electronic annotation /// 16706 // oxidoreductase activity, acting on paired donors, with incorporation or reduction of molecular oxygen, 2-oxoglutarate as one donor, and incorporation of one atom each of oxygen into both donors // inferred from electronic ann…	18401 // peptidyl-proline hydroxylation to 4-hydroxy-L-proline // inferred from sequence or structural similarity /// 19538 // protein metabolism // inferred from electronic annotation	16222 // procollagen-proline, 2-oxoglutarate-4-dioxygenase complex // Unknown	---
11909	153108_at	-0.548648	1.95409	-7.96486	4.89e-09	6.83e-08	10.2505	FBgn0036710	CG6479	CG6479	CG6479	39930	---	---	---	---
1677	142876_at	-0.497383	3.06491	-7.95663	5e-09	6.97e-08	10.2283	FBgn0013263	CG33261	Trl	Trithorax-like	2768981	3677 // DNA binding // non-traceable author statement /// 3702 // RNA polymerase II transcription factor activity // non-traceable author statement /// 3704 // specific RNA polymerase II transcription factor activity // inferred from mutant phenotype /// 3704 // specific RNA polymerase II transcription factor activity // non-traceable author statement /// 5515 // protein binding // inferred from …	280 // nuclear division // inferred from mutant phenotype /// 6325 // establishment and/or maintenance of chromatin architecture // non-traceable author statement /// 6357 // regulation of transcription from RNA polymerase II promoter // non-traceable author statement /// 7549 // dosage compensation // inferred from mutant phenotype /// 35186 // syncytial blastoderm mitotic cell cycle // inferred…	785 // chromatin // non-traceable author statement /// 5634 // nucleus // inferred from direct assay /// 5634 // nucleus // non-traceable author statement /// 5721 // centric heterochromatin // inferred from direct assay /// 5721 // centric heterochromatin // traceable author statement /// 791 // euchromatin // inferred from direct assay /// 5700 // polytene chromosome // inferred from direct ass…	IPR000210 // BTB/POZ domain // 6.7E-30
7764	148963_at	-1.3546	3.66247	-7.95467	5.02e-09	7e-08	10.223	FBgn0023197	CG6298	Jon74E	Jonah 74E	39959	4263 // chymotrypsin activity // inferred from sequence or structural similarity /// 4263 // chymotrypsin activity // non-traceable author statement /// 4295 // trypsin activity // inferred from electronic annotation /// 4263 // chymotrypsin activity // inferred from sequence similarity	6508 // proteolysis // non-traceable author statement	---	IPR001254 // Peptidase S1, chymotrypsin // 9.2E-56 /// IPR001254 // Peptidase S1, chymotrypsin // 1.5E-43
13209	154408_at	-0.747842	1.84519	-7.94497	5.16e-09	7.17e-08	10.1968	FBgn0028528	CG4482	mol	moladietz	34872	5515 // protein binding // inferred from physical interaction	7611 // learning and/or memory // inferred from mutant phenotype /// 8105 // asymmetric protein localization // inferred from mutant phenotype /// 8355 // olfactory learning // inferred from mutant phenotype	5886 // plasma membrane // inferred from direct assay /// 45178 // basal part of cell // inferred from direct assay	---
12168	153367_at	-0.486712	1.21765	-7.93989	5.23e-09	7.24e-08	10.183	FBgn0037977	CG3132	Ect3	Ect3	41457	4565 // beta-galactosidase activity // inferred from sequence or structural similarity /// 4565 // beta-galactosidase activity // inferred from electronic annotation /// 4565 // beta-galactosidase activity // inferred from sequence similarity	5975 // carbohydrate metabolism // inferred from electronic annotation /// 35071 // salivary gland cell autophagic cell death // inferred from expression pattern /// 48102 // autophagic cell death // inferred from expression pattern	5764 // lysosome // inferred from sequence or structural similarity /// 9341 // beta-galactosidase complex // inferred from electronic annotation /// 5764 // lysosome // inferred from sequence similarity	IPR001944 // Glycoside hydrolase, family 35 // 1.5E-119 /// IPR001944 // Glycoside hydrolase, family 35 // 2.8E-8
6569	147768_at	-0.867713	1.00599	-7.935	5.3e-09	7.33e-08	10.1698	FBgn0034851	CG11079	CG11079	CG11079	37699	4857 // enzyme inhibitor activity // inferred from electronic annotation /// 30272 // 5-formyltetrahydrofolate cyclo-ligase activity // inferred from sequence or structural similarity /// 30272 // 5-formyltetrahydrofolate cyclo-ligase activity // inferred from sequence similarity	8152 // metabolism // inferred from electronic annotation /// 45978 // negative regulation of nucleoside metabolism // inferred from electronic annotation	5739 // mitochondrion // inferred from electronic annotation	IPR007648 // Mitochondrial ATPase inhibitor, IATP // 3.2E-22 /// IPR002698 // 5-formyltetrahydrofolate cyclo-ligase // 5.0E-85 /// IPR002698 // 5-formyltetrahydrofolate cyclo-ligase // 5.0E-85 /// IPR002698 // 5-formyltetrahydrofolate cyclo-ligase // 5.0E-85
961	142160_at	-0.461546	1.30647	-7.92472	5.44e-09	7.51e-08	10.1419	FBgn0035262	CG18171	CG18171	CG18171	38216	---	---	---	---
12589	153788_at	-0.453674	1.47634	-7.92289	5.47e-09	7.54e-08	10.137	FBgn0031868	CG10354	CG10354	CG10354	33964	3676 // nucleic acid binding // inferred from electronic annotation /// 4534 // 5'-3' exoribonuclease activity // inferred from sequence or structural similarity /// 4527 // exonuclease activity // inferred from electronic annotation /// 4534 // 5'-3' exoribonuclease activity // inferred from sequence similarity	6139 // nucleobase, nucleoside, nucleotide and nucleic acid metabolism // inferred from electronic annotation /// 6259 // DNA metabolism // inferred from electronic annotation	5634 // nucleus // inferred from electronic annotation	IPR004859 // Putative 5-3 exonuclease domain // 1.0E-126
2425	143624_at	-1.17445	3.06914	-7.91676	5.56e-09	7.64e-08	10.1204	FBgn0010425	CG18681	Try	Trypsin	49080	4263 // chymotrypsin activity // inferred from electronic annotation /// 4295 // trypsin activity // non-traceable author statement /// 4252 // serine-type endopeptidase activity // inferred from electronic annotation	6508 // proteolysis // non-traceable author statement /// 6508 // proteolysis // inferred from electronic annotation	5576 // extracellular region // non-traceable author statement	IPR001254 // Peptidase S1, chymotrypsin // 5.6E-86
7564	148763_at	-0.55206	2.65548	-7.90603	5.72e-09	7.82e-08	10.0913	FBgn0036441	CG13476	CG13476	CG13476	39602	---	---	---	---
4615	145814_at	-0.857556	2.53726	-7.89672	5.87e-09	8e-08	10.0661	FBgn0031691	CG14034	CG14034	CG14034	33751	4620 // phospholipase activity // inferred from sequence or structural similarity /// 3824 // catalytic activity // inferred from electronic annotation /// 4620 // phospholipase activity // inferred from sequence similarity	6629 // lipid metabolism // inferred from electronic annotation /// 6644 // phospholipid metabolism // inferred from sequence or structural similarity /// 6644 // phospholipid metabolism // inferred from sequence similarity	---	IPR000734 // Lipase // 4.9E-30
6719	147918_at	-0.568856	0.512996	-7.88295	6.09e-09	8.28e-08	10.0287	FBgn0035122	CG13880	mRpL17	mitochondrial ribosomal protein L17	38046	3735 // structural constituent of ribosome // inferred from sequence or structural similarity /// 3735 // structural constituent of ribosome // inferred from electronic annotation /// 3735 // structural constituent of ribosome // inferred from sequence similarity	6412 // protein biosynthesis // inferred from sequence or structural similarity /// 6412 // protein biosynthesis // inferred from electronic annotation /// 6412 // protein biosynthesis // inferred from sequence similarity	5762 // mitochondrial large ribosomal subunit // inferred from sequence or structural similarity /// 5622 // intracellular // inferred from electronic annotation /// 5840 // ribosome // inferred from electronic annotation /// 30529 // ribonucleoprotein complex // inferred from electronic annotation /// 5762 // mitochondrial large ribosomal subunit // inferred from sequence similarity	---
3483	144682_at	-0.639574	0.780146	-7.88132	6.12e-09	8.3e-08	10.0243	FBgn0030011	CG10763	G5	G5	31744	3924 // GTPase activity // inferred from sequence or structural similarity /// 4871 // signal transducer activity // inferred from electronic annotation /// 3924 // GTPase activity // inferred from sequence similarity	7186 // G-protein coupled receptor protein signaling pathway // non-traceable author statement /// 7165 // signal transduction // inferred from electronic annotation	5834 // heterotrimeric G-protein complex // inferred from sequence or structural similarity /// 5834 // heterotrimeric G-protein complex // non-traceable author statement /// 5834 // heterotrimeric G-protein complex // inferred from sequence similarity	IPR001680 // G-protein beta WD-40 repeat // 4.6E-11 /// IPR001680 // G-protein beta WD-40 repeat // 2.7E-4 /// IPR001680 // G-protein beta WD-40 repeat // 2.9E-6 /// IPR001680 // G-protein beta WD-40 repeat // 6.7E-10 /// IPR001680 // G-protein beta WD-40 repeat // 1.6E-11 /// IPR001680 // G-protein beta WD-40 repeat // 1.5E-4 /// IPR001680 // G-protein beta WD-40 repeat // 3.4E-10
9038	150237_at	-0.529051	0.475241	-7.8701	6.3e-09	8.54e-08	9.99387	FBgn0038761	CG17190	CG17190	CG17190	42386	---	---	---	---
8851	150050_at	-0.75142	0.890833	-7.86599	6.37e-09	8.63e-08	9.9827	FBgn0038481	CG17475	CG17475	CG17475	42069	4252 // serine-type endopeptidase activity // inferred from sequence or structural similarity /// 4252 // serine-type endopeptidase activity // non-traceable author statement /// 4263 // chymotrypsin activity // inferred from electronic annotation /// 4295 // trypsin activity // inferred from electronic annotation /// 4252 // serine-type endopeptidase activity // inferred from electronic annotati…	6508 // proteolysis // non-traceable author statement /// 6508 // proteolysis // inferred from electronic annotation	---	IPR001254 // Peptidase S1, chymotrypsin // 1.6E-60
10753	151952_at	-0.527434	1.73957	-7.86534	6.38e-09	8.63e-08	9.98095	FBgn0037818	CG6465	CG6465	CG6465	41274	4046 // aminoacylase activity // inferred from sequence or structural similarity /// 8237 // metallopeptidase activity // inferred from electronic annotation /// 4046 // aminoacylase activity // inferred from electronic annotation /// 16787 // hydrolase activity // inferred from electronic annotation /// 46983 // protein dimerization activity // inferred from electronic annotation /// 4046 // ami…	6508 // proteolysis // inferred from electronic annotation /// 8652 // amino acid biosynthesis // inferred from electronic annotation /// 6520 // amino acid metabolism // inferred from electronic annotation	5737 // cytoplasm // inferred from electronic annotation	IPR002933 // Peptidase M20 // 1.1E-91
11874	153073_at	-1.02289	2.82575	-7.86296	6.43e-09	8.68e-08	9.97448	FBgn0033837	CG17034	CG17034	CG17034	36488	5524 // ATP binding // inferred from electronic annotation /// 15662 // ATPase activity, coupled to transmembrane movement of ions, phosphorylative mechanism // inferred from sequence or structural similarity /// 16820 // hydrolase activity, acting on acid anhydrides, catalyzing transmembrane movement of substances // inferred from electronic annotation /// 166 // nucleotide binding // inferred f…	6629 // lipid metabolism // inferred from electronic annotation /// 6812 // cation transport // inferred from electronic annotation /// 6869 // lipid transport // inferred from electronic annotation /// 8152 // metabolism // inferred from electronic annotation	16020 // membrane // inferred from electronic annotation /// 16021 // integral to membrane // inferred from electronic annotation	---
4310	145509_at	-0.405608	0.560467	-7.86129	6.45e-09	8.7e-08	9.96995	FBgn0002931	CG11450	net	net	45339	3700 // transcription factor activity // inferred from sequence or structural similarity /// 3702 // RNA polymerase II transcription factor activity // non-traceable author statement /// 30528 // transcription regulator activity // inferred from electronic annotation /// 3677 // DNA binding // inferred from electronic annotation /// 3700 // transcription factor activity // inferred from sequence …	8586 // wing vein morphogenesis // traceable author statement /// 45449 // regulation of transcription // inferred from sequence or structural similarity /// 7275 // development // inferred from electronic annotation /// 30154 // cell differentiation // inferred from electronic annotation /// 45449 // regulation of transcription // inferred from electronic annotation /// 45449 // regulation of tr…	5634 // nucleus // non-traceable author statement /// 5634 // nucleus // inferred from electronic annotation	IPR001092 // Basic helix-loop-helix dimerization domain bHLH // 1.5E-17 /// IPR001092 // Basic helix-loop-helix dimerization domain bHLH // 1.5E-17
11062	152261_at	-0.747511	3.59981	-7.86155	6.45e-09	8.7e-08	9.97064	FBgn0027844	CG7820	CAH1	Carbonic anhydrase 1	34786	4089 // carbonate dehydratase activity // inferred from sequence or structural similarity /// 8270 // zinc ion binding // inferred from electronic annotation /// 4089 // carbonate dehydratase activity // inferred from electronic annotation /// 4089 // carbonate dehydratase activity // inferred from sequence similarity	6730 // one-carbon compound metabolism // inferred from electronic annotation	---	IPR001148 // Carbonic anhydrase, eukaryotic // 1.9E-104
1133	142332_f_at	-0.544582	1.36063	-7.85158	6.63e-09	8.92e-08	9.94358	FBgn0034740	CG3875	CG3875	CG3875	37577	3729 // mRNA binding // inferred from electronic annotation	6139 // nucleobase, nucleoside, nucleotide and nucleic acid metabolism // inferred from electronic annotation /// 6744 // ubiquinone biosynthesis // inferred from sequence or structural similarity /// 6915 // apoptosis // inferred from electronic annotation /// 7283 // spermatogenesis // inferred from electronic annotation /// 8283 // cell proliferation // inferred from electronic annotation /// …	---	---
3933	145132_at	-0.69769	0.873637	-7.83688	6.89e-09	9.26e-08	9.90363	FBgn0030660	CG8097	CG8097	CG8097	32495	4814 // arginine-tRNA ligase activity // inferred from electronic annotation /// 5524 // ATP binding // inferred from electronic annotation	6420 // arginyl-tRNA aminoacylation // inferred from electronic annotation	---	IPR008909 // Arginyl tRNA synthetase anticodon binding // 8.7E-28
6682	147881_at	-0.553315	3.27693	-7.83656	6.9e-09	9.26e-08	9.90277	FBgn0035046	CG3683	CG3683	CG3683	37946	3954 // NADH dehydrogenase activity // inferred from sequence or structural similarity /// 8137 // NADH dehydrogenase (ubiquinone) activity // inferred from sequence or structural similarity /// 5515 // protein binding // inferred from physical interaction /// 3954 // NADH dehydrogenase activity // inferred from sequence similarity /// 8137 // NADH dehydrogenase (ubiquinone) activity // inferred …	6120 // mitochondrial electron transport, NADH to ubiquinone // inferred from sequence or structural similarity /// 6120 // mitochondrial electron transport, NADH to ubiquinone // inferred from sequence similarity	5747 // respiratory chain complex I (sensu Eukaryota) // inferred from sequence or structural similarity /// 5747 // respiratory chain complex I (sensu Eukaryota) // inferred from sequence similarity	IPR010625 // CHCH // 0.037 /// IPR010625 // CHCH // 3.0E-12
11372	152571_at	-0.468229	1.34825	-7.83353	6.96e-09	9.33e-08	9.89452	FBgn0038115	CG7966	CG7966	CG7966	41610	8430 // selenium binding // inferred from sequence or structural similarity /// 8430 // selenium binding // inferred from electronic annotation /// 8430 // selenium binding // inferred from sequence similarity	6952 // defense response // inferred from electronic annotation	---	IPR008826 // 56kDa selenium binding // 1.0E-126
3279	144478_at	-0.467952	0.0820514	-7.82907	7.04e-09	9.43e-08	9.88239	FBgn0029710	CG3568	CG3568	CG3568	31383	---	---	---	---
7758	148957_at	-1.18355	5.70276	-7.82306	7.16e-09	9.57e-08	9.86605	FBgn0036728	CG7580	CG7580	CG7580	39950	8121 // ubiquinol-cytochrome-c reductase activity // inferred from sequence or structural similarity /// 48039 // ubiquinone binding // inferred from sequence or structural similarity /// 8121 // ubiquinol-cytochrome-c reductase activity // inferred from electronic annotation /// 8121 // ubiquinol-cytochrome-c reductase activity // inferred from sequence similarity /// 48039 // ubiquinone binding…	6122 // mitochondrial electron transport, ubiquinol to cytochrome c // inferred from sequence or structural similarity /// 6118 // electron transport // inferred from electronic annotation /// 6122 // mitochondrial electron transport, ubiquinol to cytochrome c // inferred from sequence similarity	5750 // respiratory chain complex III (sensu Eukaryota) // inferred from sequence or structural similarity /// 5750 // respiratory chain complex III (sensu Eukaryota) // inferred from sequence similarity	IPR004205 // UcrQ // 1.7E-50
2141	143340_f_at	-1.71299	5.27556	-7.80844	7.44e-09	9.95e-08	9.82627	FBgn0003356 /// FBgn0003357	CG31362 /// CG31034	Jon99Cii /// Jon99Ciii	Jonah 99Cii /// Jonah 99Ciii	43543 /// 43544	4252 // serine-type endopeptidase activity // inferred from sequence or structural similarity /// 4252 // serine-type endopeptidase activity // non-traceable author statement /// 4263 // chymotrypsin activity // non-traceable author statement /// 4295 // trypsin activity // inferred from electronic annotation /// 8236 // serine-type peptidase activity // non-traceable author statement /// 4252 //…	6508 // proteolysis // non-traceable author statement /// 7586 // digestion // non-traceable author statement /// 6508 // proteolysis // inferred from electronic annotation	---	IPR001254 // Peptidase S1, chymotrypsin // 1.1E-57
2635	143834_at	-0.385407	1.70282	-7.80783	7.45e-09	9.96e-08	9.82462	FBgn0015625	CG5814	CycB3	CycB3	42971	5515 // protein binding // inferred from physical interaction /// 16538 // cyclin-dependent protein kinase regulator activity // inferred from sequence or structural similarity /// 19209 // kinase activator activity // inferred from electronic annotation /// 16538 // cyclin-dependent protein kinase regulator activity // inferred from sequence similarity	74 // regulation of progression through cell cycle // inferred from electronic annotation /// 281 // cytokinesis after mitosis // inferred from direct assay /// 281 // cytokinesis after mitosis // inferred from mutant phenotype /// 7052 // mitotic spindle organization and biogenesis // inferred from mutant phenotype /// 7067 // mitosis // inferred from direct assay /// 910 // cytokinesis // infer…	5634 // nucleus // inferred from direct assay /// 15630 // microtubule cytoskeleton // inferred from electronic annotation /// 5634 // nucleus // inferred from electronic annotation	IPR004367 // Cyclin, C-terminal // 2.3E-36 /// IPR006671 // Cyclin, N-terminal domain // 3.5E-55
2391	143590_at	-0.402075	0.111795	-7.79918	7.63e-09	1.02e-07	9.80108	FBgn0010258	CG9654	Rbp4	RNA-binding protein 4	41668	3727 // single-stranded RNA binding // inferred from direct assay /// 3729 // mRNA binding // inferred from sequence or structural similarity /// 3729 // mRNA binding // non-traceable author statement /// 166 // nucleotide binding // inferred from electronic annotation /// 3676 // nucleic acid binding // inferred from electronic annotation /// 3729 // mRNA binding // inferred from sequence simila…	6397 // mRNA processing // inferred from sequence or structural similarity /// 6403 // RNA localization // inferred from electronic annotation /// 6397 // mRNA processing // inferred from sequence similarity	5737 // cytoplasm // inferred from direct assay	IPR000504 // RNA-binding region RNP-1 (RNA recognition motif) // 4.8E-16 /// IPR000504 // RNA-binding region RNP-1 (RNA recognition motif) // 3.0E-16
4617	145816_at	-0.753796	1.39158	-7.79681	7.68e-09	1.02e-07	9.79464	FBgn0031694	CG17970	Cyp4ac2	Cyp4ac2	33755	4497 // monooxygenase activity // inferred from electronic annotation /// 16491 // oxidoreductase activity // inferred from electronic annotation /// 5506 // iron ion binding // inferred from electronic annotation /// 20037 // heme binding // inferred from electronic annotation /// 46872 // metal ion binding // inferred from electronic annotation	6118 // electron transport // inferred from electronic annotation /// 8202 // steroid metabolism // inferred from electronic annotation /// 42445 // hormone metabolism // non-traceable author statement /// 46701 // insecticide catabolism // non-traceable author statement	5792 // microsome // non-traceable author statement /// 16020 // membrane // non-traceable author statement	IPR001128 // Cytochrome P450 // 2.1E-78
6972	148171_at	-0.620912	1.1002	-7.7937	7.74e-09	1.03e-07	9.78616	FBgn0053514	CG33514	CG33514	CG33514	3346239	8431 // vitamin E binding // inferred from sequence or structural similarity /// 5215 // transporter activity // inferred from electronic annotation /// 8431 // vitamin E binding // inferred from sequence similarity	6810 // transport // inferred from electronic annotation	5622 // intracellular // inferred from electronic annotation	IPR001251 // Cellular retinaldehyde-binding)/triple function, C-terminal // 6.9E-23
2492	143691_at	-0.786227	2.78081	-7.77379	8.17e-09	1.09e-07	9.73193	FBgn0011770	CG2227	Gip	GIP-like	31960	3677 // DNA binding // inferred from electronic annotation /// 4519 // endonuclease activity // inferred from electronic annotation /// 16853 // isomerase activity // inferred from electronic annotation /// 5515 // protein binding // inferred from physical interaction	5975 // carbohydrate metabolism // inferred from electronic annotation /// 6281 // DNA repair // inferred from electronic annotation	5622 // intracellular // inferred from electronic annotation	---
9381	150580_at	-0.49287	0.870309	-7.76427	8.39e-09	1.11e-07	9.70597	FBgn0051098	CG31098	CG31098	CG31098	43057	---	---	---	IPR004119 // Protein of unknown function DUF227 // 2.2E-103
1253	142452_at	-0.763475	2.39895	-7.76183	8.44e-09	1.12e-07	9.69933	FBgn0003498	CG16901	sqd	squid	41666	3729 // mRNA binding // inferred from sequence or structural similarity /// 3729 // mRNA binding // non-traceable author statement /// 3730 // mRNA 3'-UTR binding // traceable author statement /// 166 // nucleotide binding // inferred from electronic annotation /// 3676 // nucleic acid binding // inferred from electronic annotation /// 3723 // RNA binding // inferred from electronic annotation //…	184 // mRNA catabolism, nonsense-mediated decay // traceable author statement /// 381 // regulation of alternative nuclear mRNA splicing, via spliceosome // inferred from mutant phenotype /// 6405 // RNA export from nucleus // traceable author statement /// 6406 // mRNA export from nucleus // non-traceable author statement /// 7297 // follicle cell migration (sensu Insecta) // inferred from mutan…	785 // chromatin // inferred from direct assay /// 5634 // nucleus // Unknown /// 5634 // nucleus // inferred from direct assay /// 5634 // nucleus // traceable author statement /// 5703 // polytene chromosome puff // inferred from direct assay /// 5730 // nucleolus // inferred from direct assay /// 5737 // cytoplasm // traceable author statement /// 30529 // ribonucleoprotein complex // inferred…	IPR000504 // RNA-binding region RNP-1 (RNA recognition motif) // 3.2E-26 /// IPR000504 // RNA-binding region RNP-1 (RNA recognition motif) // 2.6E-21
4799	145998_at	-0.576513	0.234659	-7.76167	8.44e-09	1.12e-07	9.69889	FBgn0031968	CG7231	CG7231	CG7231	34086	---	---	---	---
7804	149003_at	-0.58243	1.34373	-7.75491	8.6e-09	1.13e-07	9.68043	FBgn0052199	CG32199	CG32199	CG32199	40028	4656 // procollagen-proline 4-dioxygenase activity // inferred from sequence or structural similarity /// 16706 // oxidoreductase activity, acting on paired donors, with incorporation or reduction of molecular oxygen, 2-oxoglutarate as one donor, and incorporation of one atom each of oxygen into both donors // inferred from electronic annotation /// 4656 // procollagen-proline 4-dioxygenase activ…	18401 // peptidyl-proline hydroxylation to 4-hydroxy-L-proline // inferred from sequence or structural similarity /// 19538 // protein metabolism // inferred from electronic annotation /// 18401 // peptidyl-proline hydroxylation to 4-hydroxy-L-proline // inferred from sequence similarity	16222 // procollagen-proline, 2-oxoglutarate-4-dioxygenase complex // inferred from sequence or structural similarity /// 16222 // procollagen-proline, 2-oxoglutarate-4-dioxygenase complex // inferred from sequence similarity	IPR005123 // 2OG-Fe(II) oxygenase superfamily // 4.7E-11
10536	151735_at	-0.685606	2.99708	-7.75495	8.6e-09	1.13e-07	9.68056	FBgn0003731	---	Egfr	Epidermal growth factor receptor	37455	4713 // protein-tyrosine kinase activity // non-traceable author statement /// 4888 // transmembrane receptor activity // traceable author statement /// 5006 // epidermal growth factor receptor activity // inferred from sequence or structural similarity /// 5006 // epidermal growth factor receptor activity // traceable author statement /// 5524 // ATP binding // inferred from electronic annotatio…	86 // G2/M transition of mitotic cell cycle // traceable author statement /// 578 // embryonic axis specification // non-traceable author statement /// 1654 // eye development // inferred from mutant phenotype /// 1709 // cell fate determination // traceable author statement /// 1742 // oenocyte differentiation // traceable author statement /// 1745 // compound eye morphogenesis (sensu Endopteryg…	5886 // plasma membrane // traceable author statement /// 5887 // integral to plasma membrane // non-traceable author statement /// 16020 // membrane // inferred from electronic annotation /// 16021 // integral to membrane // inferred from electronic annotation	IPR006211 // Furin-like cysteine rich region // 2.4E-91 /// IPR000719 // Protein kinase // 1.2E-91 /// IPR000494 // Epidermal growth-factor receptor (EGFR), L domain // 1.3E-38 /// IPR000494 // Epidermal growth-factor receptor (EGFR), L domain // 4.0E-47
10618	151817_at	-0.964331	2.93832	-7.75007	8.71e-09	1.15e-07	9.66723	FBgn0036022	CG8329	CG8329	CG8329	39123	4263 // chymotrypsin activity // inferred from sequence or structural similarity /// 4263 // chymotrypsin activity // non-traceable author statement /// 4295 // trypsin activity // inferred from electronic annotation /// 4252 // serine-type endopeptidase activity // inferred from electronic annotation /// 8233 // peptidase activity // inferred from electronic annotation /// 16787 // hydrolase act…	6508 // proteolysis // non-traceable author statement /// 6508 // proteolysis // inferred from electronic annotation	---	IPR001254 // Peptidase S1, chymotrypsin // 1.8E-46
13221	154420_at	-0.734488	2.76475	-7.75018	8.71e-09	1.15e-07	9.66755	FBgn0005771	CG4491	noc	no ocelli	34847	3676 // nucleic acid binding // inferred from electronic annotation /// 3702 // RNA polymerase II transcription factor activity // inferred from sequence or structural similarity /// 8270 // zinc ion binding // inferred from electronic annotation /// 5515 // protein binding // inferred from physical interaction /// 3702 // RNA polymerase II transcription factor activity // inferred from sequence …	6357 // regulation of transcription from RNA polymerase II promoter // inferred from sequence or structural similarity /// 7424 // tracheal system development (sensu Insecta) // inferred from mutant phenotype /// 6357 // regulation of transcription from RNA polymerase II promoter // inferred from sequence similarity	5634 // nucleus // inferred from sequence or structural similarity /// 5634 // nucleus // inferred from electronic annotation /// 5634 // nucleus // inferred from sequence similarity	---
11334	152533_at	-0.772512	0.754179	-7.74759	8.77e-09	1.15e-07	9.66047	FBgn0050281	CG30281	CG30281	CG30281	246525	5102 // receptor binding // inferred from electronic annotation	6952 // defense response // inferred from electronic annotation /// 42742 // defense response to bacteria // inferred from electronic annotation	---	IPR002181 // Fibrinogen, beta/gamma chain, C-terminal globular // 2.1E-66
11496	152695_at	-0.485061	0.497591	-7.73974	8.96e-09	1.18e-07	9.63906	FBgn0033502	CG12910	CG12910	CG12910	36082	---	---	---	IPR008166 // Protein of unknown function DUF23 // 6.3E-94
4596	145795_at	-1.7426	3.11998	-7.7358	9.06e-09	1.19e-07	9.62831	FBgn0031653	CG8871	Jon25Biii	Jonah 25Biii	33706	4263 // chymotrypsin activity // inferred from electronic annotation /// 4295 // trypsin activity // inferred from electronic annotation /// 8236 // serine-type peptidase activity // inferred from electronic annotation /// 42708 // elastase activity // non-traceable author statement /// 4252 // serine-type endopeptidase activity // inferred from electronic annotation /// 8233 // peptidase activit…	6508 // proteolysis // non-traceable author statement /// 6508 // proteolysis // inferred from electronic annotation	---	IPR001254 // Peptidase S1, chymotrypsin // 1.0E-43
8396	149595_at	-0.620398	2.71067	-7.72431	9.34e-09	1.22e-07	9.59692	FBgn0037765	CG9458	CG9458	CG9458	41214	8415 // acyltransferase activity // inferred from electronic annotation /// 16740 // transferase activity // inferred from electronic annotation /// 5515 // protein binding // inferred from physical interaction	6629 // lipid metabolism // inferred from electronic annotation /// 6631 // fatty acid metabolism // inferred from electronic annotation	16021 // integral to membrane // inferred from electronic annotation	---
10807	152006_at	-1.33254	3.71831	-7.72114	9.42e-09	1.23e-07	9.58826	FBgn0035670	CG10472	CG10472	CG10472	38688	4252 // serine-type endopeptidase activity // inferred from sequence or structural similarity /// 4263 // chymotrypsin activity // non-traceable author statement /// 4295 // trypsin activity // inferred from electronic annotation /// 5515 // protein binding // inferred from physical interaction /// 4252 // serine-type endopeptidase activity // inferred from electronic annotation /// 8233 // pepti…	6508 // proteolysis // non-traceable author statement /// 6508 // proteolysis // inferred from electronic annotation	---	IPR001254 // Peptidase S1, chymotrypsin // 2.5E-70
12139	153338_at	-0.449784	0.113092	-7.7115	9.67e-09	1.26e-07	9.56194	FBgn0031848	CG11329	CG11329	CG11329	33938	---	---	---	---
268	141467_at	-0.455231	2.05658	-7.70762	9.77e-09	1.27e-07	9.55134	FBgn0003175	CG4444	px	plexus	37573	---	8586 // wing vein morphogenesis // traceable author statement	5654 // nucleoplasm // non-traceable author statement	---
8081	149280_at	-0.50542	0.480948	-7.70373	9.88e-09	1.28e-07	9.5407	FBgn0037254	CG14651	CG14651	CG14651	40568	---	---	---	---
7989	149188_at	-0.755049	4.90771	-7.70165	9.93e-09	1.29e-07	9.535	FBgn0037097	CG7181	CG7181	CG7181	40390	4129 // cytochrome-c oxidase activity // non-traceable author statement	6123 // mitochondrial electron transport, cytochrome c to oxygen // non-traceable author statement	5751 // respiratory chain complex IV (sensu Eukaryota) // non-traceable author statement	---
11325	152524_at	-0.836824	1.82442	-7.68944	1.03e-08	1.33e-07	9.50163	FBgn0040350	CG3690	CG3690	CG3690	31047	5215 // transporter activity // inferred from electronic annotation	6810 // transport // inferred from electronic annotation /// 7268 // synaptic transmission // inferred from electronic annotation /// 7269 // neurotransmitter secretion // inferred from electronic annotation /// 19226 // transmission of nerve impulse // inferred from electronic annotation	16021 // integral to membrane // inferred from electronic annotation	IPR005828 // General substrate transporter // 1.3E-4
7055	148254_at	-1.04462	1.21933	-7.68762	1.03e-08	1.33e-07	9.49666	FBgn0035666	CG6580	Jon65Aii	Jonah 65Aii	38684	4252 // serine-type endopeptidase activity // inferred from sequence or structural similarity /// 4252 // serine-type endopeptidase activity // non-traceable author statement /// 4263 // chymotrypsin activity // inferred from electronic annotation /// 4295 // trypsin activity // inferred from electronic annotation /// 4252 // serine-type endopeptidase activity // inferred from sequence similarity	6508 // proteolysis // non-traceable author statement	---	IPR001254 // Peptidase S1, chymotrypsin // 8.7E-43
5225	146424_at	-0.655706	2.08131	-7.67832	1.06e-08	1.36e-07	9.47121	FBgn0032664	CG5755	CG5755	CG5755	35081	5488 // binding // inferred from electronic annotation	6810 // transport // inferred from electronic annotation	16020 // membrane // inferred from electronic annotation /// 16021 // integral to membrane // inferred from electronic annotation	IPR001993 // Mitochondrial substrate carrier // 5.1E-6
10339	151538_s_at	-1.52953	3.89074	-7.67835	1.06e-08	1.36e-07	9.47131	FBgn0016724	CG11064	RfaBp	Retinoid- and fatty-acid binding protein	43827	5198 // structural molecule activity // inferred from sequence or structural similarity /// 5319 // lipid transporter activity // inferred from electronic annotation /// 5501 // retinoid binding // non-traceable author statement /// 5504 // fatty acid binding // non-traceable author statement /// 8017 // microtubule binding // inferred from direct assay /// 19841 // retinol binding // inferred fr…	6810 // transport // traceable author statement /// 6869 // lipid transport // inferred from electronic annotation /// 7224 // smoothened signaling pathway // inferred from mutant phenotype /// 16055 // Wnt receptor signaling pathway // inferred from mutant phenotype /// 6810 // transport // inferred from electronic annotation /// 16055 // Wnt receptor signaling pathway // inferred from electroni…	5576 // extracellular region // non-traceable author statement	IPR009454 // Protein of unknown function DUF1081 // 3.0E-55 /// IPR001846 // von Willebrand factor, type D // 2.9E-29 /// IPR001747 // Lipid transport protein, N-terminal // 7.1E-119
7373	148572_at	-0.560586	1.49644	-7.67784	1.06e-08	1.36e-07	9.4699	FBgn0036156	CG11726	CG11726	CG11726	39275	3729 // mRNA binding // inferred from sequence or structural similarity /// 5515 // protein binding // inferred from physical interaction /// 166 // nucleotide binding // inferred from electronic annotation /// 3676 // nucleic acid binding // inferred from electronic annotation /// 3729 // mRNA binding // inferred from sequence similarity	---	---	IPR000504 // RNA-binding region RNP-1 (RNA recognition motif) // 1.1E-10
7435	148634_at	-0.773837	3.29598	-7.66312	1.1e-08	1.42e-07	9.42963	FBgn0011455 /// FBgn0067956	CG9762	l(3)neo18 /// Dyakl(3)neo18	lethal (3) neo18 /// lethal (3) neo18	46260	3954 // NADH dehydrogenase activity // inferred from sequence or structural similarity /// 8137 // NADH dehydrogenase (ubiquinone) activity // inferred from sequence or structural similarity /// 3954 // NADH dehydrogenase activity // inferred from sequence similarity /// 8137 // NADH dehydrogenase (ubiquinone) activity // inferred from sequence similarity	6120 // mitochondrial electron transport, NADH to ubiquinone // inferred from sequence or structural similarity /// 6120 // mitochondrial electron transport, NADH to ubiquinone // inferred from sequence similarity	5747 // respiratory chain complex I (sensu Eukaryota) // inferred from sequence or structural similarity /// 5747 // respiratory chain complex I (sensu Eukaryota) // inferred from sequence similarity	---
1237	142436_at	-0.482225	1.04496	-7.66185	1.11e-08	1.42e-07	9.42615	FBgn0051493	CG31493	CG31493	CG31493	318765	---	---	---	---
6842	148041_at	-0.474008	1.88305	-7.64991	1.14e-08	1.46e-07	9.39343	FBgn0035335	CG1320	mRpL23	mitochondrial ribosomal protein L23	38302	3676 // nucleic acid binding // inferred from electronic annotation /// 3723 // RNA binding // inferred from sequence or structural similarity /// 3729 // mRNA binding // inferred from electronic annotation /// 3735 // structural constituent of ribosome // inferred from sequence or structural similarity /// 166 // nucleotide binding // inferred from electronic annotation /// 3723 // RNA binding /…	6412 // protein biosynthesis // inferred from sequence or structural similarity /// 6412 // protein biosynthesis // inferred from sequence similarity	5762 // mitochondrial large ribosomal subunit // inferred from sequence or structural similarity /// 5739 // mitochondrion // inferred from electronic annotation /// 30529 // ribonucleoprotein complex // inferred from electronic annotation /// 5762 // mitochondrial large ribosomal subunit // inferred from sequence similarity	IPR001014 // Ribosomal L23 protein // 2.2E-8
11484	152683_at	-0.369337	1.41751	-7.65014	1.14e-08	1.46e-07	9.39407	FBgn0034883	CG17664	CG17664	CG17664	37737	5386 // carrier activity // inferred from electronic annotation /// 5488 // binding // inferred from electronic annotation /// 15250 // water channel activity // inferred from sequence or structural similarity /// 5215 // transporter activity // inferred from electronic annotation /// 15250 // water channel activity // inferred from sequence similarity	6810 // transport // inferred from electronic annotation /// 19725 // cell homeostasis // inferred from electronic annotation	16020 // membrane // inferred from electronic annotation /// 16021 // integral to membrane // inferred from electronic annotation	IPR000425 // Major intrinsic protein // 3.8E-51
10634	151833_at	-0.593414	1.42645	-7.64574	1.16e-08	1.48e-07	9.38201	FBgn0030163	CG1791	CG1791	CG1791	31927	5102 // receptor binding // inferred from electronic annotation	---	---	IPR002181 // Fibrinogen, beta/gamma chain, C-terminal globular // 7.8E-48
7788	148987_at	-0.72611	2.06769	-7.62721	1.22e-08	1.55e-07	9.33122	FBgn0036778	CG5137	Cyp312a1	Cyp312a1	40005	4497 // monooxygenase activity // inferred from electronic annotation /// 16491 // oxidoreductase activity // inferred from electronic annotation	6118 // electron transport // inferred from electronic annotation /// 8202 // steroid metabolism // inferred from electronic annotation	5792 // microsome // non-traceable author statement /// 16020 // membrane // non-traceable author statement	IPR001128 // Cytochrome P450 // 7.6E-97
8791	149990_at	-0.59408	0.621625	-7.62494	1.22e-08	1.55e-07	9.325	FBgn0038387	CG5268	blp	black pearl	41937	---	1700 // embryonic development (sensu Insecta) // inferred from mutant phenotype /// 2168 // larval development (sensu Insecta) // inferred from mutant phenotype /// 6605 // protein targeting // inferred from electronic annotation /// 6810 // transport // inferred from electronic annotation /// 7275 // development // inferred from electronic annotation /// 15031 // protein transport // inferred fr…	5739 // mitochondrion // inferred from electronic annotation /// 16020 // membrane // inferred from electronic annotation	IPR005341 // Protein of unknown function UPF0108 // 2.3E-50
10179	151378_at	-1.27782	2.80961	-7.61846	1.25e-08	1.58e-07	9.30724	FBgn0040907	CG3712	mRpL33	mitochondrial ribosomal protein L33	50381	3735 // structural constituent of ribosome // inferred from sequence or structural similarity /// 3735 // structural constituent of ribosome // inferred from sequence similarity	6412 // protein biosynthesis // inferred from sequence or structural similarity /// 6412 // protein biosynthesis // inferred from sequence similarity	5762 // mitochondrial large ribosomal subunit // inferred from sequence or structural similarity /// 5762 // mitochondrial large ribosomal subunit // inferred from sequence similarity	---
2467	143666_at	-0.636541	0.752754	-7.61616	1.25e-08	1.58e-07	9.30092	FBgn0011596	CG4568	fzo	fuzzy onions	42745	3924 // GTPase activity // inferred from sequence or structural similarity /// 3924 // GTPase activity // non-traceable author statement /// 5525 // GTP binding // inferred from electronic annotation /// 19204 // nucleotide phosphatase activity // inferred from electronic annotation /// 3924 // GTPase activity // inferred from mutant phenotype /// 5515 // protein binding // inferred from physical…	6626 // protein targeting to mitochondrion // inferred from electronic annotation /// 7005 // mitochondrion organization and biogenesis // inferred from mutant phenotype /// 7283 // spermatogenesis // traceable author statement /// 7287 // Nebenkern formation // inferred from mutant phenotype /// 7287 // Nebenkern formation // traceable author statement /// 8053 // mitochondrial fusion // inferre…	5740 // mitochondrial envelope // inferred from direct assay /// 5886 // plasma membrane // non-traceable author statement /// 16021 // integral to membrane // traceable author statement /// 5739 // mitochondrion // inferred from electronic annotation /// 5741 // mitochondrial outer membrane // inferred from electronic annotation /// 16020 // membrane // inferred from electronic annotation /// 16…	IPR006884 // Fzo-like conserved region // 2.8E-102
12588	153787_at	-0.655162	0.424641	-7.61519	1.26e-08	1.59e-07	9.29826	FBgn0032848	CG10722	CG10722	CG10722	35298	---	---	---	---
11544	152743_at	-1.40623	3.31202	-7.61362	1.26e-08	1.59e-07	9.29394	FBgn0040398	CG14629	CG14629	CG14629	31055	---	---	---	IPR009832 // Protein of unknown function DUF1397 // 1.0E-126
3698	144897_at	-0.489843	-0.257989	-7.6121	1.27e-08	1.6e-07	9.28978	FBgn0030339	CG1895	Cyp28c1	Cyp28c1	32138	4197 // cysteine-type endopeptidase activity // inferred from electronic annotation /// 4497 // monooxygenase activity // inferred from electronic annotation /// 16491 // oxidoreductase activity // inferred from electronic annotation	6118 // electron transport // inferred from electronic annotation /// 6508 // proteolysis // inferred from electronic annotation /// 8202 // steroid metabolism // inferred from electronic annotation	5792 // microsome // non-traceable author statement /// 16020 // membrane // non-traceable author statement	IPR001128 // Cytochrome P450 // 4.7E-65
11541	152740_at	-0.617692	1.77723	-7.60981	1.27e-08	1.61e-07	9.2835	FBgn0035266	CG7995	CG7995	CG7995	38221	4370 // glycerol kinase activity // inferred from sequence or structural similarity /// 19200 // carbohydrate kinase activity // inferred from electronic annotation /// 4370 // glycerol kinase activity // inferred from electronic annotation /// 16301 // kinase activity // inferred from electronic annotation /// 16740 // transferase activity // inferred from electronic annotation /// 4370 // glyce…	5975 // carbohydrate metabolism // inferred from electronic annotation /// 6072 // glycerol-3-phosphate metabolism // inferred from electronic annotation /// 6629 // lipid metabolism // inferred from electronic annotation /// 6810 // transport // inferred from electronic annotation	---	IPR000577 // Carbohydrate kinase, FGGY // 1.0E-73 /// IPR000577 // Carbohydrate kinase, FGGY // 2.9E-63
4302	145501_at	-0.628746	1.20959	-7.60879	1.28e-08	1.61e-07	9.28071	FBgn0031208	CG11023	CG11023	CG11023	33155	8233 // peptidase activity // inferred from electronic annotation /// 8234 // cysteine-type peptidase activity // inferred from electronic annotation	6464 // protein modification // inferred from electronic annotation /// 6508 // proteolysis // inferred from electronic annotation /// 6605 // protein targeting // inferred from electronic annotation /// 19538 // protein metabolism // inferred from electronic annotation	---	IPR003653 // Peptidase C48, SUMO/Sentrin/Ubl1 // 1.1E-61
5290	146489_at	-0.909736	1.38218	-7.60748	1.28e-08	1.61e-07	9.27711	FBgn0041789	CG31794	Pax	Paxillin	35215	5200 // structural constituent of cytoskeleton // inferred from electronic annotation /// 8270 // zinc ion binding // inferred from electronic annotation /// 46872 // metal ion binding // inferred from electronic annotation	6928 // cell motility // inferred from electronic annotation /// 7016 // cytoskeletal anchoring // inferred from sequence or structural similarity /// 7016 // cytoskeletal anchoring // inferred from sequence similarity	5925 // focal adhesion // inferred from sequence or structural similarity /// 5925 // focal adhesion // non-traceable author statement /// 5925 // focal adhesion // inferred from sequence similarity	---
2538	143737_at	-0.537153	2.00175	-7.60513	1.29e-08	1.62e-07	9.27067	FBgn0013995	CG5685	Calx	Na/Ca-exchange protein	42481	5432 // calcium:sodium antiporter activity // inferred from direct assay /// 5432 // calcium:sodium antiporter activity // inferred from sequence or structural similarity /// 5432 // calcium:sodium antiporter activity // traceable author statement /// 8324 // cation transporter activity // inferred from electronic annotation /// 5432 // calcium:sodium antiporter activity // inferred from electron…	6364 // rRNA processing // inferred from electronic annotation /// 6812 // cation transport // inferred from electronic annotation /// 6816 // calcium ion transport // inferred from electronic annotation /// 7154 // cell communication // inferred from electronic annotation	5886 // plasma membrane // inferred from sequence or structural similarity /// 16021 // integral to membrane // inferred from electronic annotation /// 16020 // membrane // inferred from electronic annotation /// 5886 // plasma membrane // inferred from sequence similarity	IPR004837 // Sodium/calcium exchanger membrane region // 4.9E-27 /// IPR004837 // Sodium/calcium exchanger membrane region // 1.8E-27 /// IPR003644 // Na-Ca exchanger/integrin-beta4 // 5.4E-43 /// IPR003644 // Na-Ca exchanger/integrin-beta4 // 6.1E-40
1208	142407_at	-0.538105	1.84807	-7.59557	1.33e-08	1.65e-07	9.24441	FBgn0036622	CG4753	CG4753	CG4753	39819	3841 // 1-acylglycerol-3-phosphate O-acyltransferase activity // inferred from sequence or structural similarity /// 8415 // acyltransferase activity // inferred from electronic annotation /// 3841 // 1-acylglycerol-3-phosphate O-acyltransferase activity // inferred from sequence similarity	8152 // metabolism // inferred from electronic annotation	---	IPR002123 // Phospholipid/glycerol acyltransferase // 8.0E-9
1756	142955_at	-0.586677	0.188222	-7.59485	1.33e-08	1.66e-07	9.24245	FBgn0034291	CG5770	CG5770	CG5770	37054	---	---	---	IPR007931 // Protein of unknown function DUF725 // 1.8E-74
10850	152049_at	-1.52054	5.74886	-7.58875	1.35e-08	1.68e-07	9.22571	FBgn0004181	CG2668	Peb	Protein ejaculatory bulb	38009	5198 // structural molecule activity // inferred from expression pattern /// 5515 // protein binding // inferred from physical interaction	42628 // mating plug formation // traceable author statement /// 45297 // post-mating behavior // inferred from expression pattern /// 7610 // behavior // inferred from electronic annotation	5576 // extracellular region // inferred from direct assay	---
4766	145965_at	-0.575261	1.6561	-7.5848	1.36e-08	1.7e-07	9.21486	FBgn0083141	CG6717	Spn7	Serine protease inhibitor 7	---	4867 // serine-type endopeptidase inhibitor activity // inferred from electronic annotation	---	---	IPR000215 // Serpin // 3.5E-85 /// IPR000215 // Serpin // 8.2E-84
11426	152625_at	-0.605182	1.66083	-7.58168	1.38e-08	1.71e-07	9.20628	FBgn0031522	CG3285	CG3285	CG3285	33547	3677 // DNA binding // inferred from electronic annotation /// 5215 // transporter activity // inferred from electronic annotation /// 8170 // N-methyltransferase activity // inferred from electronic annotation /// 15144 // carbohydrate transporter activity // inferred from electronic annotation /// 5351 // sugar porter activity // inferred from electronic annotation	5975 // carbohydrate metabolism // inferred from electronic annotation /// 6306 // DNA methylation // inferred from electronic annotation /// 6810 // transport // inferred from electronic annotation /// 8643 // carbohydrate transport // inferred from electronic annotation	16020 // membrane // inferred from electronic annotation /// 16021 // integral to membrane // inferred from electronic annotation	IPR005828 // General substrate transporter // 1.2E-33
8587	149786_at	-0.348625	-0.175073	-7.57415	1.4e-08	1.74e-07	9.18559	---	---	---	---	---	4989 // octopamine receptor activity // inferred from sequence or structural similarity /// 1584 // rhodopsin-like receptor activity // inferred from electronic annotation /// 4871 // signal transducer activity // inferred from electronic annotation /// 4872 // receptor activity // inferred from electronic annotation /// 4930 // G-protein coupled receptor activity // inferred from electronic anno…	7189 // G-protein signaling, adenylate cyclase activating pathway // inferred from sequence or structural similarity /// 7165 // signal transduction // inferred from electronic annotation /// 7186 // G-protein coupled receptor protein signaling pathway // inferred from electronic annotation	16021 // integral to membrane // inferred from sequence or structural similarity /// 16020 // membrane // inferred from electronic annotation /// 16021 // integral to membrane // inferred from electronic annotation	---
12308	153507_at	-0.732112	2.42612	-7.57228	1.41e-08	1.75e-07	9.18045	FBgn0024986	CG3719	CG3719	CG3719	44736	30508 // thiol-disulfide exchange intermediate activity // inferred from sequence or structural similarity /// 5515 // protein binding // inferred from physical interaction /// 30508 // thiol-disulfide exchange intermediate activity // inferred from sequence similarity	6118 // electron transport // inferred from electronic annotation /// 6790 // sulfur metabolism // inferred from electronic annotation	5739 // mitochondrion // inferred from sequence or structural similarity /// 5739 // mitochondrion // inferred from sequence similarity	IPR006662 // Thioredoxin type domain // 1.8E-13
5699	146898_at	-0.480145	1.07099	-7.56232	1.45e-08	1.79e-07	9.15307	FBgn0033437	CG12926	CG12926	CG12926	35996	5386 // carrier activity // inferred from electronic annotation /// 8431 // vitamin E binding // inferred from sequence or structural similarity /// 5215 // transporter activity // inferred from electronic annotation /// 8431 // vitamin E binding // inferred from sequence similarity	6732 // coenzyme metabolism // inferred from electronic annotation /// 6810 // transport // inferred from electronic annotation /// 51189 // prosthetic group metabolism // inferred from electronic annotation	5622 // intracellular // inferred from electronic annotation	IPR001251 // Cellular retinaldehyde-binding)/triple function, C-terminal // 7.8E-24
1119	142318_at	-0.59541	1.73611	-7.55539	1.48e-08	1.82e-07	9.13404	FBgn0037433	CG17919	CG17919	CG17919	40780	8429 // phosphatidylethanolamine binding // inferred from sequence or structural similarity /// 19210 // kinase inhibitor activity // inferred from electronic annotation /// 8429 // phosphatidylethanolamine binding // inferred from sequence similarity	7165 // signal transduction // inferred from electronic annotation	---	IPR008914 // PEBP // 7.6E-63
1976	143175_at	-0.839191	4.24515	-7.55388	1.48e-08	1.82e-07	9.12988	FBgn0001092	CG8893	Gapdh2	Glyceraldehyde 3 phosphate dehydrogenase 2	32545	4365 // glyceraldehyde-3-phosphate dehydrogenase (phosphorylating) activity // inferred from direct assay /// 4365 // glyceraldehyde-3-phosphate dehydrogenase (phosphorylating) activity // inferred from sequence or structural similarity /// 4365 // glyceraldehyde-3-phosphate dehydrogenase (phosphorylating) activity // non-traceable author statement /// 4365 // glyceraldehyde-3-phosphate dehydroge…	6096 // glycolysis // inferred from expression pattern /// 6096 // glycolysis // non-traceable author statement /// 6006 // glucose metabolism // inferred from electronic annotation /// 6096 // glycolysis // inferred from electronic annotation	5737 // cytoplasm // non-traceable author statement	IPR000173 // Glyceraldehyde 3-phosphate dehydrogenase // 4.8E-120 /// IPR000173 // Glyceraldehyde 3-phosphate dehydrogenase // 1.0E-126
12792	153991_at	-0.680019	2.0349	-7.55131	1.49e-08	1.84e-07	9.1228	FBgn0031738	CG9171	CG9171	CG9171	33807	8109 // N-acetyllactosaminide beta-1,6-N-acetylglucosaminyltransferase activity // inferred from sequence or structural similarity /// 8109 // N-acetyllactosaminide beta-1,6-N-acetylglucosaminyltransferase activity // inferred from sequence similarity	---	---	---
12747	153946_at	-0.669497	3.92104	-7.5456	1.52e-08	1.86e-07	9.1071	FBgn0037358	CG2185	CG2185	CG2185	40695	5509 // calcium ion binding // inferred from sequence or structural similarity /// 5516 // calmodulin binding // inferred from electronic annotation /// 5509 // calcium ion binding // inferred from electronic annotation /// 5509 // calcium ion binding // inferred from sequence similarity	6886 // intracellular protein transport // inferred from electronic annotation /// 6887 // exocytosis // inferred from electronic annotation /// 7242 // intracellular signaling cascade // inferred from electronic annotation	---	IPR002048 // Calcium-binding EF-hand // 2.7E-7 /// IPR002048 // Calcium-binding EF-hand // 0.037
4868	146067_at	-0.492813	0.27025	-7.53903	1.55e-08	1.89e-07	9.08904	FBgn0032094	CG12439	CG12439	CG12439	34234	---	---	---	---
13192	154391_at	-0.442015	1.99712	-7.53435	1.57e-08	1.91e-07	9.07615	FBgn0033635	CG7777	CG7777	CG7777	36237	5372 // water transporter activity // inferred from sequence or structural similarity /// 5386 // carrier activity // inferred from electronic annotation /// 5488 // binding // inferred from electronic annotation /// 5215 // transporter activity // inferred from electronic annotation /// 5372 // water transporter activity // inferred from sequence similarity	6810 // transport // inferred from electronic annotation /// 19725 // cell homeostasis // inferred from electronic annotation	16020 // membrane // inferred from electronic annotation /// 16021 // integral to membrane // inferred from electronic annotation	IPR000425 // Major intrinsic protein // 1.4E-81
11608	152807_at	-0.399785	0.388765	-7.53228	1.57e-08	1.92e-07	9.07046	FBgn0033778	CG3790	CG3790	CG3790	36417	4867 // serine-type endopeptidase inhibitor activity // inferred from electronic annotation /// 8324 // cation transporter activity // inferred from electronic annotation /// 15226 // carnitine transporter activity // inferred from sequence or structural similarity /// 5215 // transporter activity // inferred from electronic annotation /// 15226 // carnitine transporter activity // inferred from …	6812 // cation transport // inferred from electronic annotation /// 6858 // extracellular transport // inferred from electronic annotation /// 6810 // transport // inferred from electronic annotation	16021 // integral to membrane // inferred from electronic annotation /// 16020 // membrane // inferred from electronic annotation	IPR005828 // General substrate transporter // 3.2E-12
1631	142830_at	-0.593618	2.19411	-7.52434	1.61e-08	1.96e-07	9.04859	FBgn0001316	CG17046	klar	klarsicht	38067	5215 // transporter activity // inferred from electronic annotation /// 5515 // protein binding // inferred from physical interaction /// 42623 // ATPase activity, coupled // inferred from sequence or structural similarity /// 3779 // actin binding // inferred from electronic annotation /// 42623 // ATPase activity, coupled // inferred from sequence similarity	7018 // microtubule-based movement // inferred from sequence or structural similarity /// 7097 // nuclear migration // inferred from mutant phenotype /// 7097 // nuclear migration // traceable author statement /// 7431 // salivary gland development // traceable author statement /// 16044 // membrane organization and biogenesis // traceable author statement /// 42051 // eye photoreceptor developme…	5635 // nuclear envelope // inferred from direct assay /// 16020 // membrane // inferred from electronic annotation /// 30286 // dynein complex // inferred from sequence or structural similarity /// 16021 // integral to membrane // inferred from electronic annotation /// 30286 // dynein complex // inferred from sequence similarity	---
9124	150323_at	-0.427521	0.053368	-7.52254	1.62e-08	1.97e-07	9.04364	FBgn0038900	CG13420	CG13420	CG13420	42559	---	---	---	---
9756	150955_at	-1.04662	2.29655	-7.50959	1.68e-08	2.03e-07	9.00798	FBgn0039873	CG2191	CG2191	CG2191	43744	8324 // cation transporter activity // inferred from electronic annotation /// 8523 // sodium-dependent multivitamin transporter activity // inferred from sequence or structural similarity /// 5215 // transporter activity // inferred from electronic annotation /// 8523 // sodium-dependent multivitamin transporter activity // inferred from sequence similarity	6732 // coenzyme metabolism // inferred from electronic annotation /// 6812 // cation transport // inferred from electronic annotation /// 6858 // extracellular transport // inferred from electronic annotation /// 51189 // prosthetic group metabolism // inferred from electronic annotation /// 6810 // transport // inferred from electronic annotation /// 6811 // ion transport // inferred from elect…	16020 // membrane // inferred from electronic annotation /// 16021 // integral to membrane // inferred from electronic annotation	IPR001734 // Na+/solute symporter // 1.7E-10 /// IPR001734 // Na+/solute symporter // 3.1E-6
2949	144148_at	-0.717731	1.3312	-7.49841	1.73e-08	2.09e-07	8.97718	FBgn0026565	CG1315	CG1315	CG1315	40812	4055 // argininosuccinate synthase activity // inferred from sequence or structural similarity /// 4055 // argininosuccinate synthase activity // non-traceable author statement /// 5524 // ATP binding // inferred from electronic annotation /// 4055 // argininosuccinate synthase activity // inferred from sequence similarity	50 // urea cycle // non-traceable author statement /// 53 // argininosuccinate metabolism // inferred from sequence or structural similarity /// 6526 // arginine biosynthesis // non-traceable author statement /// 53 // argininosuccinate metabolism // inferred from sequence similarity	---	IPR001518 // Argininosuccinate synthase // 1.0E-126
4818	146017_at	-0.585846	1.57236	-7.48412	1.8e-08	2.16e-07	8.93778	FBgn0032008	CG14277	CG14277	CG14277	34129	---	---	---	---
10738	151937_at	-0.654016	3.04391	-7.47954	1.82e-08	2.19e-07	8.92515	FBgn0037387	CG1213	CG1213	CG1213	40728	5351 // sugar porter activity // inferred from electronic annotation /// 5355 // glucose transporter activity // inferred from sequence or structural similarity /// 5515 // protein binding // inferred from physical interaction /// 5215 // transporter activity // inferred from electronic annotation /// 5355 // glucose transporter activity // inferred from sequence similarity	5975 // carbohydrate metabolism // inferred from electronic annotation /// 8643 // carbohydrate transport // inferred from electronic annotation /// 6810 // transport // inferred from electronic annotation	16020 // membrane // inferred from electronic annotation /// 16021 // integral to membrane // inferred from electronic annotation	IPR005828 // General substrate transporter // 1.2E-81
6898	148097_at	-0.389723	1.39942	-7.47714	1.83e-08	2.19e-07	8.91855	FBgn0035426	CG12078	CG12078	CG12078	38401	16791 // phosphoric monoester hydrolase activity // inferred from electronic annotation	7275 // development // inferred from electronic annotation /// 7398 // ectoderm development // inferred from electronic annotation /// 7399 // nervous system development // inferred from electronic annotation	---	IPR004274 // NLI interacting factor // 3.1E-104
[truncated: 1,711 more rows]
