# Supplementary material for: Gene expression changes in response to aging compared to heat stress, oxidative stress and ionizing radiation in Drosophila melanogaster
Source: publisher site journal article supplement (doi:10.18632/aging.100499), 2012-11-30
Supplement: Supplementary file [file aging-v4i11-100499-supplementary-material-SD18.pdf]

Supplemental Table S6. Sugar up-regulated genes

| Gene > Secondary Identifier | Gene > Symbol | Gene > Name                                           | Gene > DB identifier |
|-----------------------------|---------------|-------------------------------------------------------|----------------------|
| CG10033                     | for           | foraging                                              | FBgn0000721          |
| CG1007                      | emc           | extra                                                 | FBgn0000575          |
| CG10128                     | tra2          | macrochaetae transformer 2                            | FBgn0003742          |
| CG10207                     | NaPi-T        | Na[+]-dependent inorganic phosphate cotransporter     | FBgn0016684          |
| CG10241                     | Cyp6a17       | Cyp6a17                                               | FBgn0015714          |
| CG10289                     | CG10289       |                                                       | FBgn0035688          |
| CG10433                     | CG10433       |                                                       | FBgn0034638          |
| CG1059                      | Karybeta3     | Karyopherin beta 3                                    | FBgn0087013          |
| CG10645                     | lama          | lamina ancestor                                       | FBgn0016031          |
| CG10701                     | Moe           | Moesin                                                | FBgn0011661          |
| CG10706                     | SK            | small conductance calcium-activated potassium channel | FBgn0029761          |
| CG10810                     | Drs           | Drosomycin                                            | FBgn0010381          |
| CG10812                     | dro5          | drosomycin-5                                          | FBgn0035434          |
| CG10824                     | CG10824       |                                                       | FBgn0038865          |
| CG10833                     | Cyp28d1       | Cyp28d1                                               | FBgn0031689          |
| CG1088                      | Vha26         | Vacuolar H[+]-ATPase 26kD E subunit                   | FBgn0015324          |
| CG10912                     | CG10912       |                                                       | FBgn0034296          |
| CG11154                     | ATPsyn-beta   | ATP synthase-beta                                     | FBgn0010217          |
| CG11165                     | CG11165       |                                                       | FBgn0033238          |
| CG11198                     | ACC           | Acetyl-CoA carboxylase                                | FBgn0033246          |
| CG11259                     | MICAL-like    | MICAL-like                                            | FBgn0036333          |
| CG11279                     | CG11279       |                                                       | FBgn0036342          |
| CG11301                     | Mes4          | Mes4                                                  | FBgn0034726          |
| CG11400                     | CG11400       |                                                       | FBgn0034198          |
| CG11407                     | CG11407       |                                                       | FBgn0038733          |
| CG11589                     | VhaM9.7-c     | Vacuolar H[+] ATPase subunit M9.7-c                   | FBgn0028664          |
| CG11661                     | Nc73EF        | Neural conserved at 73EF                              | FBgn0010352          |
| CG11711                     | Mob2          | Mob2                                                  | FBgn0259481          |
| CG11791                     | CG11791       |                                                       | FBgn0039266          |
| CG11796                     | CG11796       |                                                       | FBgn0036992          |
| CG11842                     | CG11842       |                                                       | FBgn0039629          |

|         |           |                                                                                    |             |
|---------|-----------|------------------------------------------------------------------------------------|-------------|
| CG11893 | CG11893   |                                                                                    | FBgn0039316 |
| CG12008 | kst       | karst                                                                              | FBgn0004167 |
| CG1210  | Pdk1      | Phosphoinositide<br>-dependent<br>kinase 1                                         | FBgn0020386 |
| CG12116 | CG12116   |                                                                                    | FBgn0030041 |
| CG12163 | CG12163   |                                                                                    | FBgn0260462 |
| CG12288 | CG12288   |                                                                                    | FBgn0032620 |
| CG12338 | CG12338   |                                                                                    | FBgn0033543 |
| CG12737 | Crag      | Calmodulin-<br>binding protein<br>related to a<br>Rab3 GDP/GTP<br>exchange protein | FBgn0025864 |
| CG12775 | RpL21     | Ribosomal<br>protein L21                                                           | FBgn0032987 |
| CG12780 | CG12780   |                                                                                    | FBgn0033301 |
| CG12868 | CG12868   |                                                                                    | FBgn0033945 |
| CG12895 | CG12895   |                                                                                    | FBgn0033523 |
| CG13215 | CG13215   |                                                                                    | FBgn0033592 |
| CG13272 | CG13272   |                                                                                    | FBgn0086673 |
| CG13315 | CG13315   |                                                                                    | FBgn0040827 |
| CG13849 | Nop56     | Nop56                                                                              | FBgn0038964 |
| CG13868 | CG13868   |                                                                                    | FBgn0034501 |
| CG14029 | vri       | vriille                                                                            | FBgn0016076 |
| CG1412  | RhoGAP19D | RhoGAP19D                                                                          | FBgn0031118 |
| CG14125 | CG14125   |                                                                                    | FBgn0036232 |
| CG14176 | Or67b     | Odorant receptor<br>67b                                                            | FBgn0036019 |
| CG14400 | CG14400   |                                                                                    | FBgn0032896 |
| CG14535 | CG14535   |                                                                                    | FBgn0031955 |
| CG14648 | lost      | lost                                                                               | FBgn0263594 |
| CG14687 | CG14687   |                                                                                    | FBgn0037835 |
| CG14782 | CG14782   |                                                                                    | FBgn0025381 |
| CG14933 | CG14933   |                                                                                    | FBgn0040968 |
| CG14935 | Mal-B2    | Maltase B2                                                                         | FBgn0032382 |
| CG14949 | CG14949   |                                                                                    | FBgn0035358 |
| CG15019 | CG15019   |                                                                                    | FBgn0035541 |
| CG15040 | CG15040   |                                                                                    | FBgn0030940 |
| CG15067 | CG15067   |                                                                                    | FBgn0034331 |
| CG15432 | CG15432   |                                                                                    | FBgn0031603 |
| CG15745 | CG15745   |                                                                                    | FBgn0030469 |
| CG15870 | CG15870   |                                                                                    | FBgn0033798 |
| CG1600  | CG1600    |                                                                                    | FBgn0033188 |
| CG1607  | CG1607    |                                                                                    | FBgn0039844 |
| CG16707 | vsg       | visgun                                                                             | FBgn0045823 |
| CG16836 | CG16836   |                                                                                    | FBgn0040735 |
| CG16844 | IM3       | Immune induced<br>molecule 3                                                       | FBgn0040736 |

|         |         |                                       |             |
|---------|---------|---------------------------------------|-------------|
| CG16986 | CG16986 |                                       | FBgn0035356 |
| CG17210 | scpr-B  | SCP-containing protein B              | FBgn0037888 |
| CG17369 | Vha55   | Vacuolar H[+]-ATPase 55kD B subunit   | FBgn0005671 |
| CG17599 | CG17599 |                                       | FBgn0031196 |
| CG1793  | MED26   | Mediator complex subunit 26           | FBgn0039923 |
| CG18106 | IM2     | Immune induced molecule 2             | FBgn0025583 |
| CG18107 | CG18107 |                                       | FBgn0034330 |
| CG18108 | IM1     | Immune induced molecule 1             | FBgn0034329 |
| CG18135 | CG18135 |                                       | FBgn0036837 |
| CG18193 | CG18193 |                                       | FBgn0037579 |
| CG1821  | RpL31   | Ribosomal protein L31                 | FBgn0025286 |
| CG18321 | miple2  | miple2                                | FBgn0029002 |
| CG18609 | CG18609 |                                       | FBgn0034382 |
| CG18619 | CG18619 |                                       | FBgn0032202 |
| CG1984  | djl     | don juan like                         | FBgn0037463 |
| CG2050  | mod     | modulo                                | FBgn0002780 |
| CG2173  | Rs1     | Rs1                                   | FBgn0021995 |
| CG2196  | salt    | salty dog                             | FBgn0039872 |
| CG2216  | Fer1HCH | Ferritin 1 heavy chain homologue      | FBgn0015222 |
| CG2248  | Rac1    | Rac1                                  | FBgn0010333 |
| CG2249  | CG2249  |                                       | FBgn0040773 |
| CG2257  | Ubc-E2H | Ubc-E2H                               | FBgn0029996 |
| CG2471  | Sc1p    | Sc1p                                  | FBgn0030357 |
| CG2671  | l(2)g1  | lethal (2) giant larvae               | FBgn0002121 |
| CG2699  | Pi3K21B | Pi3K21B                               | FBgn0020622 |
| CG2790  | CG2790  |                                       | FBgn0027599 |
| CG2947  | HIP-R   | Hsc/Hsp70-interacting protein related | FBgn0029676 |
| CG2998  | RpS28b  | Ribosomal protein S28b                | FBgn0030136 |
| CG30015 | CG30015 |                                       | FBgn0050015 |
| CG30456 | CG30456 |                                       | FBgn0050456 |
| CG31098 | CG31098 |                                       | FBgn0051098 |
| CG31151 | wge     | winged eye                            | FBgn0051151 |
| CG31212 | Ino80   | Ino80                                 | FBgn0086613 |
| CG3164  | CG3164  |                                       | FBgn0025683 |
| CG3174  | Fmo-2   | Flavin-containing monooxygenase 2     | FBgn0033079 |
| CG31778 | CG31778 |                                       | FBgn0051778 |
| CG3186  | eIF-5A  | eIF-5A                                | FBgn0034967 |
| CG3201  | Mlc-c   | Myosin light chain cytoplasmic        | FBgn0004687 |
| CG32043 | CG32043 |                                       | FBgn0052043 |

|         |                |                                             |             |
|---------|----------------|---------------------------------------------|-------------|
| CG3226  | CG3226         |                                             | FBgn0029882 |
| CG32428 | CG32428        |                                             | FBgn0052428 |
| CG32464 | 1(3)82Fd       | 1(3)82Fd                                    | FBgn0013576 |
| CG32479 | CG32479        |                                             | FBgn0052479 |
| CG32549 | CG32549        |                                             | FBgn0052549 |
| CG32593 | Flo-2          | flotillin 2                                 | FBgn0024753 |
| CG32649 | CG32649        |                                             | FBgn0052649 |
| CG32656 | Muc11A         | Mucin 11A                                   | FBgn0052656 |
| CG32758 | CG32758        |                                             | FBgn0052758 |
| CG32789 | HIP            | Hsc/Hsp70-<br>interacting<br>protein        | FBgn0260484 |
| CG32813 | CG32813        |                                             | FBgn0052813 |
| CG3320  | Rab1           | Rab-protein 1                               | FBgn0016700 |
| CG33255 | CG33255        |                                             | FBgn0053255 |
| CG33278 | CG33278        |                                             | FBgn0053278 |
| CG3350  | bigmax         | bigmax                                      | FBgn0039509 |
| CG3354  | Mst77F         | Male-specific<br>transcript 77F             | FBgn0086915 |
| CG3376  | CG3376         |                                             | FBgn0034997 |
| CG3400  | Pfrx           | 6-phosphofructo-<br>2-kinase                | FBgn0027621 |
| CG3413  | wdp            | windpipe                                    | FBgn0034718 |
| CG3497  | Su(H)          | Suppressor of<br>Hairless                   | FBgn0004837 |
| CG3644  | bic            | bicaudal                                    | FBgn0000181 |
| CG3662  | CG3662         |                                             | FBgn0031285 |
| CG3712  | mRpL33         | mitochondrial<br>ribosomal<br>protein L33   | FBgn0040907 |
| CG3823  | CG3823         |                                             | FBgn0029863 |
| CG3920  | 1(2)k1691<br>8 | lethal (2)<br>k16918                        | FBgn0021800 |
| CG3983  | ns1            | nucleostemin 1                              | FBgn0038473 |
| CG3997  | RpL39          | Ribosomal<br>protein L39                    | FBgn0023170 |
| CG4067  | pug            | pugilist                                    | FBgn0020385 |
| CG4111  | RpL35          | Ribosomal<br>protein L35                    | FBgn0029785 |
| CG42321 | CG42321        |                                             | FBgn0259221 |
| CG4233  | Got2           | Glutamate<br>oxaloacetate<br>transaminase 2 | FBgn0001125 |
| CG42331 | CG42331        |                                             | FBgn0259233 |
| CG42390 | CG42390        |                                             | FBgn0259736 |
| CG42543 | mp             | multiplexin                                 | FBgn0260660 |
| CG42563 | inaF-D         | inaF-D                                      | FBgn0260812 |
| CG4264  | Hsc70-4        | Heat shock<br>protein cognate<br>4          | FBgn0001219 |
| CG4312  | MtnB           | Metallothionein<br>B                        | FBgn0002869 |
| CG43427 | CG43427        |                                             | FBgn0263346 |
| CG4364  | CG4364         |                                             | FBgn0032138 |

|        |         |                                               |             |
|--------|---------|-----------------------------------------------|-------------|
| CG4399 | east    | enhanced adult<br>sensory<br>threshold        | FBgn0261954 |
| CG4427 | cbt     | cabut                                         | FBgn0043364 |
| CG4491 | noc     | no ocelli                                     | FBgn0005771 |
| CG4501 | bgm     | bubblegum                                     | FBgn0027348 |
| CG4580 | CG4580  |                                               | FBgn0032585 |
| CG4710 | Pino    | Pinocchio                                     | FBgn0016926 |
| CG4716 | CG4716  |                                               | FBgn0033820 |
| CG4783 | CG4783  |                                               | FBgn0038756 |
| CG4994 | Mpcp    | Mitochondrial<br>phosphate<br>carrier protein | FBgn0026409 |
| CG5193 | TfIIB   | Transcription<br>factor IIB                   | FBgn0004915 |
| CG5203 | CHIP    | CHIP                                          | FBgn0027052 |
| CG5271 | RpS27A  | Ribosomal<br>protein S27A                     | FBgn0003942 |
| CG5277 | Ip259   | Intronic Protein<br>259                       | FBgn0025366 |
| CG5295 | bmm     | brummer                                       | FBgn0036449 |
| CG5330 | Nap1    | Nucleosome<br>assembly protein<br>1           | FBgn0015268 |
| CG5373 | Pi3K59F | Phosphatidylinositol<br>3 kinase<br>59F       | FBgn0015277 |
| CG5395 | nmd     | no mitochondrial<br>derivative                | FBgn0005322 |
| CG5411 | Pde8    | Phosphodiesterase<br>8                        | FBgn0034886 |
| CG5508 | CG5508  |                                               | FBgn0027579 |
| CG5527 | CG5527  |                                               | FBgn0039564 |
| CG5535 | CG5535  |                                               | FBgn0036764 |
| CG5547 | Pect    | Phosphoethanolamine<br>cytidyltransferase     | FBgn0032482 |
| CG5560 | dob     | doppelganger von<br>brummer                   | FBgn0030607 |
| CG5654 | yps     | epsilon<br>schachtel                          | FBgn0022959 |
| CG5794 | CG5794  |                                               | FBgn0039214 |
| CG5820 | Gp150   | Gp150                                         | FBgn0013272 |
| CG5874 | Nelf-A  | Negative<br>elongation<br>factor A            | FBgn0038872 |
| CG5887 | desat1  | desat1                                        | FBgn0086687 |
| CG5915 | Rab7    | Rab-protein 7                                 | FBgn0015795 |
| CG6004 | Muc68D  | Mucin 68D                                     | FBgn0036203 |
| CG6115 | CG6115  |                                               | FBgn0040985 |
| CG6169 | Dcp2    | Decapping<br>protein 2                        | FBgn0036534 |
| CG6213 | Vha13   | Vacuolar H[+]<br>ATPase G-subunit             | FBgn0026753 |
| CG6311 | Edc3    | Enhancer of<br>decapping 3                    | FBgn0036735 |
| CG6357 | CG6357  |                                               | FBgn0033875 |
| CG6438 | amon    | amontillado                                   | FBgn0023179 |

|        |            |                                             |             |
|--------|------------|---------------------------------------------|-------------|
| CG6455 | CG6455     |                                             | FBgn0019960 |
| CG6500 | Bx         | Beadex                                      | FBgn0000242 |
| CG6501 | ns2        | nucleostemin 2                              | FBgn0034243 |
| CG6597 | CG6597     |                                             | FBgn0036967 |
| CG6721 | Gap1       | GTPase-activating protein 1                 | FBgn0004390 |
| CG6764 | RpL24-like | Ribosomal protein L24-like                  | FBgn0037899 |
| CG6843 | CG6843     |                                             | FBgn0036827 |
| CG6904 | CG6904     |                                             | FBgn0038293 |
| CG6910 | CG6910     |                                             | FBgn0036262 |
| CG6957 | Oscillin   | Oscillin                                    | FBgn0031717 |
| CG6980 | CG6980     |                                             | FBgn0039228 |
| CG6998 | ctp        | cut up                                      | FBgn0011760 |
| CG7007 | VhaPPA1-1  | Vacuolar H[+] ATPase subunit PPA1-1         | FBgn0028662 |
| CG7069 | CG7069     |                                             | FBgn0038952 |
| CG7106 | lectin-28C | lectin-28C                                  | FBgn0040099 |
| CG7224 | CG7224     |                                             | FBgn0031971 |
| CG7338 | CG7338     |                                             | FBgn0037073 |
| CG7380 | baf        | barrier to autointegration factor           | FBgn0031977 |
| CG7398 | Trn        | Transportin                                 | FBgn0024921 |
| CG7425 | eff        | effete                                      | FBgn0011217 |
| CG7452 | Syx17      | Syntaxin 17                                 | FBgn0035540 |
| CG7535 | GluClalpha | GluClalpha                                  | FBgn0024963 |
| CG7574 | bipl       | bipl                                        | FBgn0026263 |
| CG7586 | Mcr        | Macroglobulin complement-related cropped    | FBgn0020240 |
| CG7664 | crp        |                                             | FBgn0001994 |
| CG7695 | CG7695     |                                             | FBgn0038631 |
| CG7763 | CG7763     |                                             | FBgn0040503 |
| CG7808 | RpS8       | Ribosomal protein S8                        | FBgn0039713 |
| CG7917 | Nlp        | Nucleoplasmin                               | FBgn0016685 |
| CG7962 | CdsA       | CDP diglyceride synthetase                  | FBgn0010350 |
| CG8029 | VhaAC45    | Vacuolar H[+] ATPase accessory protein AC45 | FBgn0262515 |
| CG8053 | eIF-1A     | Eukaryotic initiation factor 1A             | FBgn0026250 |
| CG8094 | Hex-C      | Hexokinase C                                | FBgn0001187 |
| CG8147 | CG8147     |                                             | FBgn0043791 |
| CG8153 | mus210     | mutagen-sensitive 210                       | FBgn0004698 |
| CG8156 | Arf51F     | ADP ribosylation factor 51F                 | FBgn0013750 |
| CG8174 | SRPK       | SRPK                                        | FBgn0026370 |

|        |                 |                                                                          |             |
|--------|-----------------|--------------------------------------------------------------------------|-------------|
| CG8229 | CG8229          |                                                                          | FBgn0033356 |
| CG8280 | Ef1alpha4<br>8D | Elongation<br>factor 1alpha48D                                           | FBgn0000556 |
| CG8344 | RpIII128        | RNA polymerase<br>III 128kD<br>subunit                                   | FBgn0004463 |
| CG8345 | Cyp6w1          | Cyp6w1                                                                   | FBgn0033065 |
| CG8353 | CG8353          |                                                                          | FBgn0032002 |
| CG8358 | CG8358          |                                                                          | FBgn0037727 |
| CG8385 | Arf79F          | ADP ribosylation<br>factor 79F                                           | FBgn0010348 |
| CG8404 | Sox15           | Sox box protein<br>15                                                    | FBgn0005613 |
| CG8416 | Rho1            | Rho1                                                                     | FBgn0014020 |
| CG8430 | Got1            | Glutamate<br>oxaloacetate<br>transaminase 1                              | FBgn0001124 |
| CG8444 | VhaM8.9         |                                                                          | FBgn0037671 |
| CG8448 | mrj             | mrj                                                                      | FBgn0034091 |
| CG8468 | CG8468          |                                                                          | FBgn0033913 |
| CG8542 | Hsc70-5         | Heat shock<br>protein cognate<br>5                                       | FBgn0001220 |
| CG8588 | pst             | pastrel                                                                  | FBgn0035770 |
| CG8651 | trx             | trithorax                                                                | FBgn0003862 |
| CG8677 | CG8677          |                                                                          | FBgn0026577 |
| CG8759 | Nacalpa         | Nascent<br>polypeptide<br>associated<br>complex protein<br>alpha subunit | FBgn0086904 |
| CG8764 | ox              | oxen                                                                     | FBgn0011227 |
| CG8801 | CG8801          |                                                                          | FBgn0028473 |
| CG8874 | Fps85D          | Fps oncogene<br>analog                                                   | FBgn0000723 |
| CG8965 | CG8965          |                                                                          | FBgn0031745 |
| CG9091 | RpL37a          | Ribosomal<br>protein L37a                                                | FBgn0030616 |
| CG9171 | CG9171          |                                                                          | FBgn0031738 |
| CG9214 | Tob             | Tob                                                                      | FBgn0028397 |
| CG9261 | nrv2            | nervana 2                                                                | FBgn0015777 |
| CG9277 | betaTub56<br>D  | beta-Tubulin at<br>56D                                                   | FBgn0003887 |
| CG9324 | Pomp            | Pomp                                                                     | FBgn0032884 |
| CG9434 | Fst             | Frost                                                                    | FBgn0037724 |
| CG9472 | brv1            | brivido-1                                                                | FBgn0036874 |
| CG9621 | Adgf-D          | Adenosine<br>deaminase-<br>related growth<br>factor D                    | FBgn0038172 |
| CG9648 | Max             | Max                                                                      | FBgn0017578 |
| CG9655 | nes             | nessy                                                                    | FBgn0026630 |
| CG9696 | dom             | domino                                                                   | FBgn0020306 |
| CG9837 | CG9837          |                                                                          | FBgn0037635 |
| CG9894 | CG9894          |                                                                          | FBgn0031453 |

|         |         |             |
|---------|---------|-------------|
| CG9928  | CG9928  | FBgn0032472 |
| CR4575  | CR4575  |             |
| CG42747 | CG42747 |             |

### Sugar down-regulated genes

| Gene ><br>Secondary<br>Identifier | Gene ><br>Symbol | Gene > Name                                                           | Gene > DB identifier |
|-----------------------------------|------------------|-----------------------------------------------------------------------|----------------------|
| CG10037                           | vv1              | ventral veins<br>lacking                                              | FBgn0086680          |
| CG10096                           | CG10096          |                                                                       | FBgn0038032          |
| CG10097                           | CG10097          |                                                                       | FBgn0038033          |
| CG10120                           | Men              | Malic enzyme                                                          | FBgn0002719          |
| CG10125                           | zpg              | zero population<br>growth                                             | FBgn0024177          |
| CG10160                           | ImpL3            | Ecdysone-<br>inducible gene<br>L3                                     | FBgn0001258          |
| CG1019                            | Mlp84B           | Muscle LIM<br>protein at 84B                                          | FBgn0014863          |
| CG10221                           | Hrd3             |                                                                       | FBgn0028475          |
| CG10237                           | CG10237          |                                                                       | FBgn0032783          |
| CG10374                           | Lsd-1            | Lipid storage<br>droplet-1                                            | FBgn0039114          |
| CG10472                           | CG10472          |                                                                       | FBgn0035670          |
| CG10475                           | Jonah65Ai        | Jonah 65Ai                                                            | FBgn0035667          |
| CG10513                           | CG10513          |                                                                       | FBgn0039311          |
| CG10514                           | CG10514          |                                                                       | FBgn0039312          |
| CG10516                           | CG10516          |                                                                       | FBgn0036549          |
| CG10578                           | DnaJ-1           | DnaJ-like-1                                                           | FBgn0263106          |
| CG10657                           | CG10657          |                                                                       | FBgn0036289          |
| CG10706                           | SK               | small<br>conductance<br>calcium-<br>activated<br>potassium<br>channel | FBgn0029761          |
| CG10747                           | CG10747          |                                                                       | FBgn0032845          |
| CG10840                           | eIF5B            | eIF5B                                                                 | FBgn0026259          |
| CG10852                           | Acp63F           | Accessory gland<br>peptide 63F                                        | FBgn0015585          |
| CG10866                           | CG10866          |                                                                       | FBgn0035475          |
| CG10960                           | CG10960          |                                                                       | FBgn0036316          |
| CG11037                           | CG11037          |                                                                       | FBgn0037038          |
| CG11051                           | Nplp2            | Neuropeptide-<br>like precursor 2                                     | FBgn0040813          |
| CG11064                           | Rfabg            | Retinoid- and<br>fatty acid-<br>binding<br>glycoprotein               | FBgn0087002          |
| CG11143                           | Inos             | Inos                                                                  | FBgn0025885          |
| CG11166                           | Eaf              | ELL-associated<br>factor                                              | FBgn0033166          |
| CG11200                           | CG11200          | Carbonyl<br>reductase                                                 | FBgn0034500          |



|         |          |                                       |             |
|---------|----------|---------------------------------------|-------------|
| CG11379 | CG11379  |                                       | FBgn0040362 |
| CG11505 | CG11505  |                                       | FBgn0035424 |
| CG1152  | Gld      | Glucose<br>dehydrogenase              | FBgn0001112 |
| CG11598 | CG11598  |                                       | FBgn0038067 |
| CG11601 | CG11601  |                                       | FBgn0031244 |
| CG11624 | Ubi-p63E | Ubiquitin-63E                         | FBgn0003943 |
| CG11635 | CG11635  |                                       | FBgn0033283 |
| CG1165  | LysS     | Lysozyme S                            | FBgn0004430 |
| CG11719 | Mst98Ca  | Male-specific<br>RNA 98Ca             | FBgn0002865 |
| CG1179  | LysB     | Lysozyme B                            | FBgn0004425 |
| CG1180  | LysE     | Lysozyme E                            | FBgn0004428 |
| CG11892 | CG11892  |                                       | FBgn0039313 |
| CG11911 | CG11911  |                                       | FBgn0031249 |
| CG11942 | skpE     | skpE                                  | FBgn0031074 |
| CG12057 | CG12057  |                                       | FBgn0030098 |
| CG12120 | t        | tan                                   | FBgn0086367 |
| CG12262 | CG12262  |                                       | FBgn0035811 |
| CG12287 | pdm2     | POU domain<br>protein 2               | FBgn0004394 |
| CG1231  | CG1231   |                                       | FBgn0035134 |
| CG12351 | deltaTry | deltaTrypsin                          | FBgn0010358 |
| CG12374 | CG12374  |                                       | FBgn0033774 |
| CG12385 | thetaTry | thetaTrypsin                          | FBgn0011555 |
| CG1242  | Hsp83    | Heat shock<br>protein 83              | FBgn0001233 |
| CG12498 | CG12498  |                                       | FBgn0040356 |
| CG12534 | Alr      | Augmenter of<br>liver<br>regeneration | FBgn0031068 |
| CG1262  | Acp62F   | Accessory gland<br>peptide 62F        | FBgn0020509 |
| CG12679 | CG12679  |                                       | FBgn0031103 |
| CG12703 | CG12703  |                                       | FBgn0031069 |
| CG12730 | CG12730  |                                       | FBgn0029771 |
| CG12813 | Npc2d    | Niemann-Pick<br>type C-2d             | FBgn0037782 |
| CG1287  | CG1287   |                                       | FBgn0037506 |
| CG1288  | CG1288   |                                       | FBgn0250845 |
| CG12902 | CG12902  |                                       | FBgn0033512 |
| CG12990 | CG12990  |                                       | FBgn0030859 |
| CG13061 | Nplp3    | Neuropeptide-<br>like precursor 3     | FBgn0042201 |
| CG13095 | Bace     | beta-site APP-<br>cleaving enzyme     | FBgn0032049 |
| CG1316  | CG1316   |                                       | FBgn0035526 |
| CG1327  | Ccp84Ac  | Ccp84Ac                               | FBgn0004781 |
| CG1330  | Ccp84Ae  | Ccp84Ae                               | FBgn0004779 |
| CG1331  | Ccp84Af  | Ccp84Af                               | FBgn0004778 |
| CG13310 | CG13310  |                                       | FBgn0035928 |

|         |           |                                                |             |
|---------|-----------|------------------------------------------------|-------------|
| CG13801 | CG13801   |                                                | FBgn0035332 |
| CG13873 | Obp56g    | Odorant-binding protein 56g                    | FBgn0034474 |
| CG13907 | CG13907   |                                                | FBgn0035173 |
| CG1394  | CG1394    |                                                | FBgn0030277 |
| CG13977 | Cyp6a18   | Cyp6a18                                        | FBgn0039519 |
| CG13989 | CG13989   |                                                | FBgn0031786 |
| CG14011 | CG14011   |                                                | FBgn0031722 |
| CG14028 | cype      | cyclope                                        | FBgn0015031 |
| CG14034 | CG14034   |                                                | FBgn0250847 |
| CG14080 | Mkp3      | Mitogen-activated protein kinase phosphatase 3 | FBgn0036844 |
| CG14191 | CG14191   |                                                | FBgn0030981 |
| CG14220 | CG14220   |                                                | FBgn0031036 |
| CG14224 | Ubqn      | Ubiquilin                                      | FBgn0031057 |
| CG14245 | CG14245   |                                                | FBgn0039452 |
| CG14246 | CG14246   |                                                | FBgn0040608 |
| CG14302 | CG14302   |                                                | FBgn0038647 |
| CG14375 | CCHa2     | CCHamide-2                                     | FBgn0038147 |
| CG14471 | CG14471   |                                                | FBgn0033049 |
| CG14513 | yemalpha  | yemanuclein alpha                              | FBgn0005596 |
| CG14515 | CG14515   |                                                | FBgn0039648 |
| CG14560 | msopa     | male-specific opa containing gene              | FBgn0004414 |
| CG14688 | CG14688   |                                                | FBgn0037819 |
| CG14745 | PGRP-SC2  | PGRP-SC2                                       | FBgn0043575 |
| CG14746 | PGRP-SC1a | PGRP-SC1a                                      | FBgn0043576 |
| CG14770 | CG14770   |                                                | FBgn0029573 |
| CG14879 | CG14879   |                                                | FBgn0038419 |
| CG14938 | cro1      | crooked legs                                   | FBgn0020309 |
| CG14995 | CG14995   |                                                | FBgn0035497 |
| CG15008 | Cpr64Ac   | Cuticular protein 64Ac                         | FBgn0035512 |
| CG15147 | CG15147   |                                                | FBgn0032654 |
| CG15155 | CG15155   |                                                | FBgn0032669 |
| CG15199 | CG15199   |                                                | FBgn0030270 |
| CG15239 | CG15239   |                                                | FBgn0029681 |
| CG15278 | CG15278   |                                                | FBgn0032554 |
| CG15353 | CG15353   |                                                | FBgn0040718 |
| CG15358 | CG15358   |                                                | FBgn0031373 |
| CG15572 | CG15572   |                                                | FBgn0029702 |
| CG15616 | Acp53C14b | Acp53C14b                                      | FBgn0034153 |
| CG15635 | CG15635   |                                                | FBgn0031617 |
| CG15704 | CG15704   |                                                | FBgn0034103 |
| CG15708 | CG15708   |                                                | FBgn0034099 |

|         |                |                                                  |             |
|---------|----------------|--------------------------------------------------|-------------|
| CG15862 | Pka-R2         | cAMP-dependent<br>protein kinase<br>R2           | FBgn0022382 |
| CG1633  | Jafrac1        | thioredoxin<br>peroxidase 1                      | FBgn0040309 |
| CG1657  | CG1657         |                                                  | FBgn0030286 |
| CG16711 | CG16711        |                                                  | FBgn0036032 |
| CG16738 | slp1           | sloppy paired 1                                  | FBgn0003430 |
| CG16749 | CG16749        |                                                  | FBgn0037678 |
| CG16772 | CG16772        |                                                  | FBgn0032835 |
| CG1678  | CG1678         |                                                  | FBgn0031176 |
| CG1683  | Ant2           | Adenine<br>nucleotide<br>translocase 2           | FBgn0025111 |
| CG16926 | CG16926        |                                                  | FBgn0040732 |
| CG17097 | CG17097        |                                                  | FBgn0032275 |
| CG17192 | CG17192        |                                                  | FBgn0039472 |
| CG17248 | n-syb          | n-synaptobrevin                                  | FBgn0013342 |
| CG17320 | ScpX           | Sterol carrier<br>protein X-<br>related thiolase | FBgn0015808 |
| CG17323 | CG17323        |                                                  | FBgn0032713 |
| CG17325 | CG17325        |                                                  | FBgn0040993 |
| CG1742  | Mgst1          | Microsomal<br>glutathione S-<br>transferase-like | FBgn0025814 |
| CG17472 | CG17472        |                                                  | FBgn0032868 |
| CG1751  | Spase25        | Spase 25-subunit                                 | FBgn0030306 |
| CG17525 | GstE4          | Glutathione S<br>transferase E4                  | FBgn0063496 |
| CG17571 | CG17571        |                                                  | FBgn0259998 |
| CG17597 | CG17597        |                                                  | FBgn0032715 |
| CG17633 | CG17633        |                                                  | FBgn0032144 |
| CG17637 | CG17637        |                                                  | FBgn0037004 |
| CG17666 | CG17666        |                                                  | FBgn0036311 |
| CG17673 | Acp70A         | Accessory gland<br>peptide 70A                   | FBgn0003034 |
| CG17725 | Pepck          | Phosphoenolpyruv<br>ate<br>carboxykinase         | FBgn0003067 |
| CG17751 | CG17751        |                                                  | FBgn0038717 |
| CG17752 | CG17752        |                                                  | FBgn0038718 |
| CG1787  | Hexo2          | Hexosaminidase 2                                 | FBgn0041629 |
| CG17924 | Acp95EF        | Accessory gland-<br>specific peptide<br>95EF     | FBgn0002863 |
| CG1803  | regucalc<br>in | regucalcin                                       | FBgn0030362 |
| CG18030 | Jon99Fi        | Jonah 99Fi                                       | FBgn0039778 |
| CG18064 | Met75Cb        | Met75Cb                                          | FBgn0028415 |
| CG18170 | CG18170        |                                                  | FBgn0035239 |
| CG18180 | CG18180        |                                                  | FBgn0036024 |
| CG18211 | betaTry        | betaTrypsin                                      | FBgn0010357 |
| CG18258 | CG18258        |                                                  | FBgn0030827 |

|         |              |                                                   |             |
|---------|--------------|---------------------------------------------------|-------------|
| CG18284 | CG18284      |                                                   | FBgn0043825 |
| CG18301 | CG18301      |                                                   | FBgn0032265 |
| CG18444 | alphaTry     | alphaTrypsin                                      | FBgn0003863 |
| CG18594 | Pebp1        | Phosphatidylethanolamine-binding protein 1        | FBgn0038973 |
| CG18681 | epsilonTry   | epsilonTrypsin                                    | FBgn0010425 |
| CG1951  | CG1951       |                                                   | FBgn0039623 |
| CG2034  | CG2034       |                                                   | FBgn0015359 |
| CG2229  | Jon99Fii     | Jonah 99Fii                                       | FBgn0039777 |
| CG2244  | MTA1-like    | MTA1-like                                         | FBgn0027951 |
| CG2254  | CG2254       |                                                   | FBgn0029994 |
| CG2310  | CG2310       |                                                   | FBgn0039665 |
| CG2665  | PebII        | Protein ejaculatory bulb II                       | FBgn0011694 |
| CG2668  | Peb          | Protein ejaculatory bulb                          | FBgn0004181 |
| CG2675  | Csat         | Csat                                              | FBgn0024994 |
| CG2781  | CG2781       |                                                   | FBgn0037534 |
| CG2943  | CG2943       |                                                   | FBgn0037530 |
| CG30025 | CG30025      |                                                   | FBgn0050025 |
| CG30028 | gammaTry     | gammaTrypsin                                      | FBgn0010359 |
| CG30031 | CG30031      |                                                   | FBgn0050031 |
| CG30042 | Cpr49Ab      | Cuticular protein 49Ab                            | FBgn0050042 |
| CG30084 | Zasp52       | Z band alternatively spliced PDZ-motif protein 52 | FBgn0083919 |
| CG30158 | CG30158      |                                                   | FBgn0050158 |
| CG30183 | CG30183      |                                                   | FBgn0050183 |
| CG3019  | su(w[a])     | suppressor of white-apricot                       | FBgn0003638 |
| CG30372 | CG30372      |                                                   | FBgn0050372 |
| CG30431 | CG30431      |                                                   | FBgn0050431 |
| CG31022 | PH4alpha EFB | prolyl-4-hydroxylase-alpha EFB                    | FBgn0039776 |
| CG31034 | Jon99Cii     | Jonah 99Cii                                       | FBgn0003356 |
| CG31039 | Jon99Ci      | Jonah 99Ci                                        | FBgn0003358 |
| CG31072 | Lerp         | lysosomal enzyme receptor protein                 | FBgn0051072 |
| CG31094 | LpR1         | Lipophorin receptor 1                             | FBgn0066101 |
| CG31233 | CG31233      |                                                   | FBgn0051233 |
| CG31362 | Jon99Ciii    | Jonah 99Ciii                                      | FBgn0003357 |
| CG3143  | foxo         | forkhead box, sub-group O                         | FBgn0038197 |
| CG31522 | CG31522      |                                                   | FBgn0051522 |
| CG31688 | CG31688      |                                                   | FBgn0263355 |
| CG31772 | CG31772      |                                                   | FBgn0051772 |
| CG31795 | IA-2         | IA-2 ortholog                                     | FBgn0031294 |

|         |                |                                             |             |
|---------|----------------|---------------------------------------------|-------------|
| CG31872 | CG31872        |                                             | FBgn0051872 |
| CG32031 | Argk           | Arginine kinase                             | FBgn0000116 |
| CG32096 | rols           | rolling pebbles                             | FBgn0041096 |
| CG32226 | CG32226        |                                             | FBgn0052226 |
| CG32436 | CG32436        |                                             | FBgn0052436 |
| CG3244  | Clect27        | C-type lectin<br>27kD                       | FBgn0031629 |
| CG32473 | CG32473        |                                             | FBgn0052473 |
| CG32479 | CG32479        |                                             | FBgn0052479 |
| CG32548 | CG32548        |                                             | FBgn0052548 |
| CG32694 | CG32694        |                                             | FBgn0052694 |
| CG32703 | CG32703        |                                             | FBgn0052703 |
| CG32815 | CG32815        |                                             | FBgn0052815 |
| CG33110 | CG33110        |                                             | FBgn0053110 |
| CG33113 | Rtnl1          | Rtnl1                                       | FBgn0053113 |
| CG33173 | CG33173        |                                             | FBgn0053173 |
| CG3329  | Prosbeta<br>2  | Proteasome beta2<br>subunit                 | FBgn0023174 |
| CG33519 | Unc-89         | Unc-89                                      | FBgn0053519 |
| CG33555 | btsz           | bitesize                                    | FBgn0053555 |
| CG33791 | CG33791        |                                             | FBgn0035240 |
| CG33936 | CG33936        |                                             | FBgn0053936 |
| CG3401  | betaTub6<br>0D | beta-Tubulin at<br>60D                      | FBgn0003888 |
| CG34120 | CG34120        |                                             | FBgn0083956 |
| CG34205 | CG34205        |                                             | FBgn0085234 |
| CG34330 | CG34330        |                                             | FBgn0085359 |
| CG34381 | CG34381        |                                             | FBgn0085410 |
| CG34383 | CG34383        |                                             | FBgn0085412 |
| CG34394 | CG34394        |                                             | FBgn0085423 |
| CG3481  | Adh            | Alcohol<br>dehydrogenase                    | FBgn0000055 |
| CG3484  | Adhr           | Adh-related                                 | FBgn0000056 |
| CG3581  | CG3581         |                                             | FBgn0038697 |
| CG3612  | blw            | bellwether                                  | FBgn0011211 |
| CG3725  | Ca-P60A        | Calcium ATPase<br>at 60A                    | FBgn0263006 |
| CG3780  | Spx            | Spliceosomal<br>protein on the X            | FBgn0015818 |
| CG3801  | Acp76A         | Accessory gland-<br>specific peptide<br>76A | FBgn0015586 |
| CG3861  | kdn            | knockdown                                   | FBgn0261955 |
| CG3868  | CG3868         |                                             | FBgn0036422 |
| CG3902  | CG3902         |                                             | FBgn0036824 |
| CG3971  | Baldspot       | Baldspot                                    | FBgn0260960 |
| CG4068  | CG4068         |                                             | FBgn0029738 |
| CG4097  | Pros26         | Proteasome 26kD<br>subunit                  | FBgn0002284 |
| CG4105  | Cyp4e3         | Cytochrome P450-<br>4e3                     | FBgn0015035 |

|         |          |                                                       |             |
|---------|----------|-------------------------------------------------------|-------------|
| CG4147  | Hsc70-3  | Heat shock protein cognate 3                          | FBgn0001218 |
| CG4178  | Lsplbeta | Larval serum protein 1 beta                           | FBgn0002563 |
| CG42268 | CG42268  |                                                       | FBgn0259163 |
| CG42339 | CG42339  |                                                       | FBgn0259241 |
| CG42349 | Pkcdelta | Protein kinase C delta                                | FBgn0259680 |
| CG42351 | CG42351  |                                                       | FBgn0259682 |
| CG42540 | CG42540  |                                                       | FBgn0260657 |
| CG42551 | larp     | Ia related protein                                    | FBgn0261618 |
| CG42572 | MCPH1    | Microcephalin                                         | FBgn0260959 |
| CG42610 | Fhos     |                                                       | FBgn0261259 |
| CG42666 | CG42666  |                                                       | FBgn0261548 |
| CG42669 | CG42669  |                                                       | FBgn0261551 |
| CG42683 | CG42683  |                                                       | FBgn0261569 |
| CG4272  | Axud1    |                                                       | FBgn0261647 |
| CG42732 | CG42732  |                                                       | FBgn0261698 |
| CG4286  | CG4286   |                                                       | FBgn0034601 |
| CG43119 | Ect4     | Ect4                                                  | FBgn0262579 |
| CG43286 | cnc      | cap-n-collar                                          | FBgn0262975 |
| CG43442 | Nha2     | Na <sup>+</sup> /H <sup>+</sup> hydrogen antiporter 2 | FBgn0263390 |
| CG43658 | CG43658  |                                                       | FBgn0263706 |
| CG4379  | Pka-C1   | cAMP-dependent protein kinase 1                       | FBgn0000273 |
| CG4451  | Hs6st    | Heparan sulfate 6-O-sulfotransferase                  | FBgn0038755 |
| CG4527  | slik     | Sterile20-like kinase                                 | FBgn0035001 |
| CG4581  | Thiolase | Thiolase                                              | FBgn0025352 |
| CG4600  | yip2     | yippee interacting protein 2                          | FBgn0040064 |
| CG4654  | Dp       | DP transcription factor                               | FBgn0011763 |
| CG4666  | CG4666   |                                                       | FBgn0029838 |
| CG4690  | Tsp5D    | Tetraspanin 5D                                        | FBgn0029837 |
| CG4692  | CG4692   |                                                       | FBgn0035032 |
| CG4734  | CG4734   |                                                       | FBgn0033826 |
| CG4750  | loopin-1 | loopin-1                                              | FBgn0259795 |
| CG4753  | CG4753   |                                                       | FBgn0036622 |
| CG4812  | Ser8     | Ser8                                                  | FBgn0019928 |
| CG4898  | Tm1      | Tropomyosin 1                                         | FBgn0003721 |
| CG4986  | Mst57Dc  | Male-specific RNA 57Dc                                | FBgn0011670 |
| CG5016  | Mst57Db  | Male-specific RNA 57Db                                | FBgn0011669 |
| CG5021  | CG5021   |                                                       | FBgn0035944 |
| CG5155  | CG5155   |                                                       | FBgn0031905 |
| CG5162  | CG5162   |                                                       | FBgn0030828 |

|        |           |                                  |             |
|--------|-----------|----------------------------------|-------------|
| CG5177 | CG5177    |                                  | FBgn0031908 |
| CG5326 | CG5326    |                                  | FBgn0038983 |
| CG5389 | CG5389    |                                  | FBgn0036568 |
| CG5594 | kcc       | kazachoc                         | FBgn0261794 |
| CG5767 | CG5767    |                                  | FBgn0034292 |
| CG5773 | CG5773    |                                  | FBgn0034290 |
| CG5902 | CG5902    |                                  | FBgn0039136 |
| CG5932 | CG5932    |                                  | FBgn0036996 |
| CG5945 | CG5945    |                                  | FBgn0032494 |
| CG6051 | CG6051    |                                  | FBgn0039492 |
| CG6186 | Tsfl      | Transferrin 1                    | FBgn0022355 |
| CG6202 | Surf4     | Surfeit 4                        | FBgn0019925 |
| CG6271 | CG6271    |                                  | FBgn0039476 |
| CG6289 | Spn77Bc   | Serpin 77Bc                      | FBgn0036970 |
| CG6295 | CG6295    |                                  | FBgn0039471 |
| CG6298 | Jon74E    | Jonah 74E                        | FBgn0023197 |
| CG6342 | Irp-1B    | Iron regulatory protein 1B       | FBgn0024957 |
| CG6372 | S-Lap1    | Sperm-Leucylaminopeptidase 1     | FBgn0035915 |
| CG6457 | yip7      | yippee interacting protein 7     | FBgn0040060 |
| CG6467 | Jon65Aiv  | Jonah 65Aiv                      | FBgn0250815 |
| CG6483 | Jon65Aiii | Jonah 65Aiii                     | FBgn0035665 |
| CG6492 | Ucp4A     | Ucp4A                            | FBgn0030872 |
| CG6543 | CG6543    |                                  | FBgn0033879 |
| CG6580 | Jon65Aii  | Jonah 65Aii                      | FBgn0035666 |
| CG6663 | Spn77Bb   | Serpin 77Bb                      | FBgn0036969 |
| CG6730 | Cyp4d21   | Cyp4d21                          | FBgn0031925 |
| CG6763 | CG6763    |                                  | FBgn0039069 |
| CG6783 | fabp      | fatty acid binding protein       | FBgn0037913 |
| CG6806 | Lsp2      | Larval serum protein 2           | FBgn0002565 |
| CG7052 | TepII     | Thiolester containing protein II | FBgn0041182 |
| CG7157 | Acp36DE   | Accessory gland peptide 36DE     | FBgn0011559 |
| CG7176 | Idh       | Isocitrate dehydrogenase         | FBgn0001248 |
| CG7203 | CG7203    |                                  | FBgn0031942 |
| CG7228 | pes       | peste                            | FBgn0031969 |
| CG7287 | Lcp65Aa   | Lcp65Aa                          | FBgn0020645 |
| CG7349 | CG7349    |                                  | FBgn0030975 |
| CG7478 | Act79B    | Actin 79B                        | FBgn0000045 |
| CG7532 | l(2)34Fc  | lethal (2) 34Fc                  | FBgn0261534 |
| CG7542 | CG7542    |                                  | FBgn0036738 |
| CG7592 | Obp99b    | Odorant-binding protein 99b      | FBgn0039685 |

|        |           |                                       |             |
|--------|-----------|---------------------------------------|-------------|
| CG7720 | CG7720    |                                       | FBgn0038652 |
| CG7781 | CG7781    |                                       | FBgn0032021 |
| CG7916 | CG7916    |                                       | FBgn0028534 |
| CG7920 | CG7920    |                                       | FBgn0039737 |
| CG7953 | CG7953    |                                       | FBgn0028533 |
| CG8116 | CG8116    |                                       | FBgn0037614 |
| CG8129 | CG8129    |                                       | FBgn0037684 |
| CG8137 | Spn2      | Serine protease inhibitor 2           | FBgn0028987 |
| CG8193 | CG8193    |                                       | FBgn0033367 |
| CG8299 | CG8299    |                                       | FBgn0034052 |
| CG8566 | unc-104   | unc-104                               | FBgn0034155 |
| CG8577 | PGRP-SC1b | PGRP-SC1b                             | FBgn0033327 |
| CG8622 | Acp53Ea   | Accessory gland-specific peptide 53Ea | FBgn0015584 |
| CG8626 | Acp53C14a | Acp53C14a                             | FBgn0034152 |
| CG8628 | CG8628    |                                       | FBgn0250836 |
| CG8654 | CG8654    |                                       | FBgn0034479 |
| CG8661 | CG8661    |                                       | FBgn0030837 |
| CG8722 | Nup44A    | Nucleoporin 44A                       | FBgn0033247 |
| CG8786 | CG8786    |                                       | FBgn0036897 |
| CG8867 | Jon25Bi   | Jonah 25Bi                            | FBgn0020906 |
| CG8869 | Jon25Bii  | Jonah 25Bii                           | FBgn0031654 |
| CG8871 | Jon25Biii | Jonah 25Biii                          | FBgn0031653 |
| CG8952 | CG8952    |                                       | FBgn0030688 |
| CG8982 | Acp26Aa   | Accessory gland-specific peptide 26Aa | FBgn0002855 |
| CG8994 | exu       | exuperantia                           | FBgn0000615 |
| CG8997 | CG8997    |                                       | FBgn0028920 |
| CG9057 | Lsd-2     | Lipid storage droplet-2               | FBgn0030608 |
| CG9074 | Mst57Da   | Male-specific RNA 57Da                | FBgn0011668 |
| CG9090 | CG9090    |                                       | FBgn0034497 |
| CG9092 | Gal       | beta galactosidase                    | FBgn0001089 |
| CG9111 | LysC      | Lysozyme C                            | FBgn0004426 |
| CG9118 | LysD      | Lysozyme D                            | FBgn0004427 |
| CG9130 | CG9130    |                                       | FBgn0035197 |
| CG9132 | CG9132    |                                       | FBgn0030791 |
| CG9133 | CG9133    |                                       | FBgn0035198 |
| CG9159 | Kr-h2     | Kruppel homolog 2                     | FBgn0028419 |
| CG9259 | CG9259    |                                       | FBgn0032913 |
| CG9297 | CG9297    |                                       | FBgn0038181 |
| CG9334 | Spn3      | Serine protease inhibitor 3           | FBgn0028986 |
| CG9379 | by        | blistery                              | FBgn0000244 |



|         |                |                         |             |
|---------|----------------|-------------------------|-------------|
| CG9380  | CG9380         |                         | FBgn0035094 |
| CG9396  | CG9396         |                         | FBgn0037714 |
| CG9399  | CG9399         |                         | FBgn0037715 |
| CG9494  | Tsp29Fa        | Tetraspanin 29Fa        | FBgn0032074 |
| CG9528  | retm           | real-time               | FBgn0031814 |
| CG9539  | Sec61alp<br>ha | Sec61alpha              | FBgn0086357 |
| CG9540  | Ag5r2          | Antigen 5-<br>related 2 | FBgn0020508 |
| CG9570  | CG9570         |                         | FBgn0031085 |
| CG9572  | CG9572         |                         | FBgn0031089 |
| CG9619  | CG9619         |                         | FBgn0036862 |
| CG9673  | CG9673         |                         | FBgn0030775 |
| CG9748  | bel            | belle                   | FBgn0263231 |
| CG9753  | AdoR           | Adenosine<br>receptor   | FBgn0039747 |
| CG9861  | CG9861         |                         | FBgn0034844 |
| CG9919  | CG9919         |                         | FBgn0030742 |
| CR18854 | CR18854        |                         | FBgn0042174 |
| CR31781 | CR31781        |                         | FBgn0051781 |
| CG43313 | CG43313        |                         | FBgn0263005 |
